# Supplementary material for: Phytochrome-Mediated Light Perception Affects Fruit Development and Ripening Through Epigenetic Mechanisms
Source: Front Plant Sci. 2022 Apr 28;13:870974. doi: 10.3389/fpls.2022.870974 (PMC9096621; doi:10.3389/fpls.2022.870974)
Supplement: Supplementary file 1 [file Data_Sheet_1.XLSX]

## Sheet: Table S1
Supplementary Table 1. Summary of sequencing, trimming and mapping RNAseq data.
Genotype/Stage/Replicate	Raw Reads	Reads written after trimming	%	Uniquely mapped reads number	Uniquely mapped reads number (%)	Number of identified loci
WT/Immature Green/A	24045944	23087347	96.0135	19864226	86.04	22119
WT/Immature Green/B	20026170	19293653	96.3422	16271277	84.33	22246
WT/Immature Green/C	21363136	20466656	95.8036	17111988	83.61	22256
phyA/Immature Green/A	19959051	19088563	95.6386	15725055	82.38	21815
phyA/Immature Green/B	25832732	25126460	97.266	22237040	88.5	23137
phyA/Immature Green/C	23654742	22674570	95.8563	18922826	83.45	22683
phyB1B2/Immature Green/A	25213493	24283724	96.3124	20767277	85.52	22104
phyB1B2/Immature Green/B	22672086	21748986	95.9285	18382847	84.52	21762
phyB1B2/Immature Green/C	25423016	24281788	95.511	20571783	84.72	22690
WT/Breaker/A	20447875	19603874	95.8724	15752262	80.35	20251
WT/Breaker/B	29271999	27867981	95.2035	22874180	82.08	20606
WT/Breaker/C	17285214	16716456	96.7096	14124513	84.49	19195
phyA/Breaker/A	25990106	24863174	95.664	20968981	84.34	21117
phyA/Breaker/B	28591229	27631392	96.6429	22905994	82.9	21873
phyA/Breaker/C	20779443	19929194	95.9082	17130203	85.96	20225
phyB1B2/Breaker/A	20210092	19412984	96.0559	16409411	84.53	22020
phyB1B2/Breaker/B	23342125	22471698	96.271	19278809	85.79	22187
phyB1B2/Breaker/C	24176246	23217402	96.0339	18158443	78.21	21687

## Sheet: Table S2
Supplementary Table 2. Primer sequences.
Gene	Locus	Primer sequence
POR1	Solyc12g013710	F: 5´- CATCCCTCGGAGCTATTAGA - 3´
		R: 5´- GAGTCACAGGGGTACTCGT - 3´
POR2	Solyc10g006900	F: 5´- AGAAACTCGTTGGTTTGGC - 3´
		R: 5´- TCGGTTACAAATTCTCACTC - 3´
POR3	Solyc07g054210	F: 5´- TGGAGGGACCTGCAAAGAAT - 3´
		R: 5´- TGAATGGTAACAAGTAACGAAGC - 3´
CHLM	Solyc03g118240	F: 5´- AAGGTGCCATTGTATCAG - 3´
		R: 5´-TCCAAACTCTCCAAGTCC - 3´
CHLD	Solyc10g008740	F: 5´- TTTGTATCATTCCCTTCCGA - 3´
		R: 5´- ATCCCAACTCTAACTGCC - 3´
CRD1	Solyc10g077040	F: 5´- TGCCTTTCGGTTTATGTG - 3´
		R: 5´- GTTAATCTCCACCATCCTG - 3´
DXS1	Solyc01g067890	F: 5´- CAGGACTGGTGTGGTTTCAG - 3´
		R: 5´- GGGATAGTTCACAGTGTCC - 3´
ISPE	Solyc01g009010	F: 5´- GTAATGCTGCAACAACTC - 3´
		R: 5´- GGCTTTATGAGGACCATTGG - 3´
GGPS2	Solyc04g079960	F: 5´- GTTGATTCATGGGGTCAAGC - 3´
		R: 5´- CAAATCGCCTTTTCAGCTACG - 3
PSY1	Solyc03g031860	F: 5´- CGATGGTGCTTTGTCCGATAC - 3´
		R: 5´- CGCATTCCTTCAACCATATCTCTG- 3´
PDS	Solyc03g123760	F: 5´- CGTTCCGTGCTTCTCCGC - 3´
		R: 5´- CTAGAACATCCCTTGCCTCCAG - 3´
ZDS	solyc01g097810	F: 5´- AGTGGTTTCTGTCTAAAGGTGG - 3´
		R: 5´- ACCGAGCACTCATGTTATCAC - 3´
CRTISO	Solyc10g081650	F: 5´- AAGACCCACAGACGATACCT - 3´
		R: 5´- ATCGCCAACACAATATAGACCA - 3´
ZISO	Solyc12g097810	F: 5´- CCTTCTTCTTCCTATACCCGTCG - 3´
		R: 5´- AGCGTGTGAGCTAAGCACCA - 3´
PIF4	Solyc07g043580	F: 5´- GGCTTAGGTTCACATACAG - 3´
		R: 5´- TGATGGTGTCGTTGTCTC - 3´
SPS	Solyc07g061990	F: 5´- GTGGTTGCGGATGACCTACTTA - 3´
		R: 5´- CTTCTGTGATTTGTGGTGAGTTCC - 3´
RIN	Solyc05g012020	F: 5´- TCAAACATCATGGCATTGTGGTG - 3´
		R: 5´- TGCATTTTCGGGTTGTACATTATCG - 3´
NOR	Solyc10g006880	F: 5´- TAATGATGGGGTCGTCTTTCG - 3´
		R: 5´- ATTTTACAGGGCTAACTATTTTTTGC - 3´
CNR	Solyc02g077920	F: 5´- GCCAAATCAAGCAATGATGA - 3´
		R: 5´- TCGCAACCATACAGACCATT - 3´
AP2a	Solyc03g044300	F: 5´- AACGGACCACAATCTTGAC - 3´
		R: 5´- CTGCTCGGAGTCTGAACC - 3´
CAC	Solyc10g049850	F: 5´ - CCTCCGTTGTGATGTAACTGG - 3´
		R: 5´ -ATTGGTGGAAAGTAACATCATCG - 3´
Expressed	Solyc07g025390	F: 5´ - GCTAAGAACGCTGGACCTAATG - 3´
		R: 5´ - TGGGTGTGCCTTTCTGAATG - 3´

## Sheet: Table S3
Supplementary Table 3. Summary of sequencing, trimming, mapping and methylation calling in WGBS.
					Total methylated C's				Total unmethylated C's				Global C methylation
Sample	Raw Reads	Reads written after trimming	Uniquely aligned reads	Total number of C´s analysed	CG	CHG	CHH	Unknown	CG	CHG	CHH	Unknown (CN or CHN)	CG	CHG	CHH	Unknown (CN or CHN)
WT - Immature Green	292.140.964	281.414.251	157.644.029	3529577274	341000576	245498631	598770661	1591245	79813414	131294064	2133199928	2576434	0.81	0.652	0.219	0.382
phyA - Immature Green	249.778.386	240.101.127	147.741.798	3258438565	285720107	224581950	599323032	1537500	69283593	109816051	1969713832	2352451	0.805	0.672	0.233	0.395
phyB1B2 - Immature Green	265.522.292	254.589.275	157.050.082	3372109788	285382657	227325230	582712332	1614725	72588374	116456741	2087644454	2552276	0.797	0.661	0.218	0.388
WT - Breaker	240.861.066	230.085.609	131.310.984	2841743699	266898889	204107803	527794222	1305112	61553665	92072331	1689316789	2068820	0.813	0.689	0.238	0.387
phyA - Breaker	245.678.032	238.305.429	149.588.601	3202172217	286800610	228328658	649124787	1549625	66740808	99928817	1871248537	2146232	0.811	0.696	0.258	0.419
phyB1B2 - Breaker	248.353.338	238.670.736	145.719.945	3065587621	259115771	209271628	536149431	1492824	63347605	100474002	1897229184	2362026	0.804	0.676	0.22	0.387
