# Supplementary material for: Phytochrome-Mediated Light Perception Affects Fruit Development and Ripening Through Epigenetic Mechanisms
Source: Front Plant Sci. 2022 Apr 28;13:870974. doi: 10.3389/fpls.2022.870974 (PMC9096621; doi:10.3389/fpls.2022.870974)
Supplement: Supplementary file 2 [file Data_Sheet_2.XLSX]

## Sheet: 4A_Summary_sRNA_data
Supplementary Table 4A. Summary of sequencing, trimming and mapping sRNAseq data.
Genotype/Stage/Replicate	Raw Reads	Reads written after trimming	%	Uniquely mapped reads number	Uniquely mapped reads number (%)	Multiple mapped reads number	Multiple mappes reads number (%)
WT - Immature Green A	24429390	20682244	84.6613	5145647	0.2488	13590151	0.6571
WT - Immature Green B	21292955	16799591	78.8974	4582376	0.2728	10512194	0.6257
WT - Immature Green C	22888567	16969690	74.1405	4144450	0.2442	11305722	0.6662
phyA - Immature Green A	22907628	15399532	67.2245	4127655	0.268	9964901	0.6471
phyA - Immature Green B	22377750	10170820	45.4506	2465983	0.2425	6329502	0.6223
phyA - Immature Green C	20952939	17439702	83.2327	4219230	0.2419	11161540	0.64
phyB1B2 - Immature Green A	25446146	20897096	82.1228	6432712	0.3078	11254002	0.5385
phyB1B2 - Immature Green B	24430011	14892894	60.9615	3932884	0.2641	8889723	0.5969
phyB1B2 - Immature Green C	23143401	14462408	62.4904	3447303	0.2384	9035633	0.6248
WT - Breaker A	22215240	8330891	37.5008	1812433	0.2176	5410794	0.6495
WT - Breaker B	23930950	18516914	77.3764	3876864	0.2094	12039636	0.6502
WT - Breaker C	21267985	12872788	60.5266	3233217	0.2512	8173469	0.6349
phyA - Breaker A	21767300	13842880	63.5948	3373224	0.2437	8720448	0.63
phyA - Breaker B	23630510	17062513	72.2054	3913204	0.2293	11062730	0.6484
phyA - Breaker C	18187847	8817703	48.4813	2214749	0.2512	5522559	0.6263
phyB1B2 - Breaker A	22114037	17221116	77.8741	4920500	0.2857	10349354	0.601
phyB1B2 - Breaker B	22251034	9556872	42.9502	2934084	0.203	9341003	0.6462
phyB1B2 - Breaker C	24386405	14455598	59.2773	2934084	0.203	9341003	0.6462

## Sheet: 4B_sRNA_Clusters
Supplementary Table 4B. sRNA clusters identification
								Overlapping feature ID
end	Cluster_ID	Chromosome	type	start	end	strand	DicerCall	gene_body	promoter	TE_superfamily	TE_ID
568407	Cluster_1	SL3.0ch00	nc_RNA	567201	568407	*	24			TIR_MITEov10	ms65618_SL3.0ch00_DXX-MITE_SL3_120k-B-G372-Map9
1149060	Cluster_2	SL3.0ch00	nc_RNA	1148684	1149060	*	N			Gypsy	ms114702_SL3.0ch00_RYX-incomp-chim_SL3_120k-B-R1684-Map20
1212333	Cluster_3	SL3.0ch00	nc_RNA	1211481	1212333	-	24			Gypsy	ms459014_SL3.0ch00_RLX-incomp_SL3_120k-B-R7097-Map7
1683267	Cluster_4	SL3.0ch00	nc_RNA	1683063	1683267	+	N
1683900	Cluster_5	SL3.0ch00	nc_RNA	1683722	1683900	*	24			SAT	ms327975_SL3.0ch00_RXX-LARD_SL3_120k-B-R1426-Map12
1692294	Cluster_6	SL3.0ch00	nc_RNA	1691756	1692294	*	24			Gypsy	ms262659_SL3.0ch00_RLX-incomp_SL3_120k-B-R2710-Map7
2017569	Cluster_7	SL3.0ch00	nc_RNA	2017540	2017569	+	24				ms262659_SL3.0ch00_RLX-incomp_SL3_120k-B-R2710-Map7-exon1
2513922	Cluster_8	SL3.0ch00	nc_RNA	2513652	2513922	*	24			Gypsy_withPotentialHostGeneDomain	ms65641_SL3.0ch00_RLX-incomp_SL3_120k-B-R4132-Map10
2513922	Cluster_8	SL3.0ch00	nc_RNA	2513652	2513922	*	24			Gypsy	ms557636_SL3.0ch00_RLX-incomp_SL3_120k-B-R4207-Map20_reversed
3988204	Cluster_9	SL3.0ch00	nc_RNA	3988033	3988204	*	22			Gypsy	ms355100_SL3.0ch00_RLX-incomp_SL3_120k-B-R1909-Map5
3988204	Cluster_9	SL3.0ch00	nc_RNA	3988033	3988204	*	22				ms65641_SL3.0ch00_RLX-incomp_SL3_120k-B-R4132-Map10-exon2
4198708	Cluster_10	SL3.0ch00	nc_RNA	4196807	4198708	+	N			Gypsy	ms427218_SL3.0ch00_RYX-incomp-chim_SL3_120k-B-R1684-Map20
4200944	Cluster_11	SL3.0ch00	nc_RNA	4200821	4200944	-	24			Gypsy	ms427218_SL3.0ch00_RYX-incomp-chim_SL3_120k-B-R1684-Map20
4257118	Cluster_12	SL3.0ch00	nc_RNA	4256935	4257118	-	22			Gypsy	ms427218_SL3.0ch00_RYX-incomp-chim_SL3_120k-B-R1684-Map20
4277292	Cluster_13	SL3.0ch00	nc_RNA	4276950	4277292	-	N			Confused_TE_withPotentialHostGeneDomain	ms427222_SL3.0ch00_RLX-incomp_SL3_120k-B-R7791-Map20
4306311	Cluster_14	SL3.0ch00	nc_RNA	4305872	4306311	-	24	Solyc00g006490		Copia_withPotentialHostGeneDomain	ms16611_SL3.0ch00_RLX-incomp_SL3_120k-B-R7657-Map20_reversed
5349540	Cluster_15	SL3.0ch00	nc_RNA	5349152	5349540	*	24
5631827	Cluster_16	SL3.0ch00	nc_RNA	5630963	5631827	-	N
5632560	Cluster_17	SL3.0ch00	nc_RNA	5632352	5632560	*	23			Gypsy	ms1621_SL3.0ch00_RYX-incomp-chim_SL3_120k-B-R1684-Map20
5656548	Cluster_18	SL3.0ch00	nc_RNA	5655604	5656548	-	N
5774993	Cluster_19	SL3.0ch00	nc_RNA	5774011	5774993	*	24
5782021	Cluster_20	SL3.0ch00	nc_RNA	5781093	5782021	*	24		PROM_Solyc00g006805
5822869	Cluster_21	SL3.0ch00	nc_RNA	5822809	5822869	+	23	Solyc00g006820
5833041	Cluster_22	SL3.0ch00	nc_RNA	5832312	5833041	*	N	Solyc00g006830
6383027	Cluster_23	SL3.0ch00	nc_RNA	6382735	6383027	-	24			EPRV	ms2447_SL3.0ch00_RLX-incomp_SL3_120k-B-R1955-Map8_reversed
6383027	Cluster_23	SL3.0ch00	nc_RNA	6382735	6383027	-	24				ms1621_SL3.0ch00_RYX-incomp-chim_SL3_120k-B-R1684-Map20-exon1
6385509	Cluster_24	SL3.0ch00	nc_RNA	6385122	6385509	*	24			Unclassified	ms264704_SL3.0ch00_noCat_SL3_120k-B-R200-Map13
6393342	Cluster_25	SL3.0ch00	nc_RNA	6392330	6393342	-	24	Solyc00g006867
6650379	Cluster_26	SL3.0ch00	nc_RNA	6649959	6650379	*	N
6693681	Cluster_27	SL3.0ch00	nc_RNA	6692580	6693681	*	24
7018548	Cluster_28	SL3.0ch00	nc_RNA	7018226	7018548	-	N			Unclassified	ms264750_SL3.0ch00_noCat_SL3_120k-B-R3538-Map5
7584581	Cluster_29	SL3.0ch00	nc_RNA	7582871	7584581	-	N
7588674	Cluster_30	SL3.0ch00	nc_RNA	7586797	7588674	-	N			EPRV	ms166597_SL3.0ch00_RLX-incomp_SL3_120k-B-R1955-Map8_reversed
7792763	Cluster_31	SL3.0ch00	nc_RNA	7792321	7792763	*	24
7802956	Cluster_32	SL3.0ch00	nc_RNA	7802610	7802956	*	23		PROM_Solyc00g009030
7843597	Cluster_33	SL3.0ch00	nc_RNA	7843137	7843597	*	24		PROM_Solyc00g009090
7846367	Cluster_34	SL3.0ch00	nc_RNA	7846004	7846367	*	24
7846993	Cluster_35	SL3.0ch00	nc_RNA	7846779	7846993	*	24
7858018	Cluster_36	SL3.0ch00	nc_RNA	7857451	7858018	*	24
7860870	Cluster_37	SL3.0ch00	nc_RNA	7860105	7860870	*	24
7863893	Cluster_38	SL3.0ch00	nc_RNA	7863586	7863893	*	24
8382099	Cluster_39	SL3.0ch00	nc_RNA	8381658	8382099	-	N			Copia	ms414735_SL3.0ch00_RLX-incomp_SL3_120k-B-R142-Map20
8382099	Cluster_39	SL3.0ch00	nc_RNA	8381658	8382099	-	N			Gypsy	ms3114_SL3.0ch00_RLX-incomp_SL3_120k-B-G1550-Map9
8407016	Cluster_40	SL3.0ch00	nc_RNA	8405292	8407016	-	N
8408794	Cluster_41	SL3.0ch00	nc_RNA	8408684	8408794	*	24			Unclassified	ms262679_SL3.0ch00_noCat_SL3_120k-B-R388-Map5
8410058	Cluster_42	SL3.0ch00	nc_RNA	8409833	8410058	-	N			Gypsy	ms363714_SL3.0ch00_RYX-incomp-chim_SL3_120k-B-P72.379-Map17
8411086	Cluster_43	SL3.0ch00	nc_RNA	8410662	8411086	-	N			Unclassified	ms462241_SL3.0ch00_noCat_SL3_120k-B-R2743-Map5
8411086	Cluster_43	SL3.0ch00	nc_RNA	8410662	8411086	-	N			Gypsy	ms462238_SL3.0ch00_RYX-incomp-chim_SL3_120k-B-R1684-Map20
8413767	Cluster_44	SL3.0ch00	nc_RNA	8411187	8413767	-	N			Gypsy	ms3571_SL3.0ch00_RYX-incomp-chim_SL3_120k-B-G103-Map20
8437812	Cluster_45	SL3.0ch00	nc_RNA	8437338	8437812	-	N			Confused_TE	ms4155_SL3.0ch00_RIX-incomp-chim_SL3_120k-B-R187-Map11_reversed
8437812	Cluster_45	SL3.0ch00	nc_RNA	8437338	8437812	-	N			hAT	ms4154_SL3.0ch00_DTX-incomp_SL3_120k-B-G1812-Map20_reversed
8438455	Cluster_46	SL3.0ch00	nc_RNA	8437967	8438455	-	N			Unclassified	ms528522_SL3.0ch00_noCat_SL3_120k-B-G1192-Map10
8438455	Cluster_46	SL3.0ch00	nc_RNA	8437967	8438455	-	N			Gypsy	ms528472_SL3.0ch00_RLX-incomp-chim_SL3_120k-B-P178.0-Map5
8440374	Cluster_47	SL3.0ch00	nc_RNA	8438612	8440374	-	N				ms528522_SL3.0ch00_noCat_SL3_120k-B-G1192-Map10-exon2
8440934	Cluster_48	SL3.0ch00	nc_RNA	8440849	8440934	-	N			Gypsy	ms528556_SL3.0ch00_RYX-incomp-chim_SL3_120k-B-R1684-Map20
8440934	Cluster_48	SL3.0ch00	nc_RNA	8440849	8440934	-	N			Copia_withPotentialHostGeneDomain	ms202179_SL3.0ch00_RLX-incomp_SL3_120k-B-R7657-Map20_reversed
8636673	Cluster_49	SL3.0ch00	nc_RNA	8636351	8636673	+	N
8637557	Cluster_50	SL3.0ch00	nc_RNA	8636752	8637557	+	N			HostGene	ms5618_SL3.0ch00_noCat_SL3_120k-B-R3049-Map6
8637833	Cluster_51	SL3.0ch00	nc_RNA	8637663	8637833	+	N			SSR	ms71423_SL3.0ch00_SSR_SL3_120k-B-G318-Map20_reversed
8639355	Cluster_52	SL3.0ch00	nc_RNA	8637986	8639355	+	N			Gypsy	ms71853_SL3.0ch00_RIX-incomp-chim_SL3_120k-B-R4047-Map5
8641944	Cluster_53	SL3.0ch00	nc_RNA	8641435	8641944	+	N
8846200	Cluster_54	SL3.0ch00	nc_RNA	8845748	8846200	+	N	Solyc06g024330		Gypsy	ms596175_SL3.0ch00_RYX-incomp-chim_SL3_120k-B-R1684-Map20
8846810	Cluster_55	SL3.0ch00	nc_RNA	8846668	8846810	+	N	Solyc06g024330		Gypsy	ms596176_SL3.0ch00_RYX-incomp-chim_SL3_120k-B-R1684-Map20
8847818	Cluster_56	SL3.0ch00	nc_RNA	8847000	8847818	+	N	Solyc06g024330		Gypsy	ms596176_SL3.0ch00_RYX-incomp-chim_SL3_120k-B-R1684-Map20
8848271	Cluster_57	SL3.0ch00	nc_RNA	8847960	8848271	+	N	Solyc06g024330		Gypsy	ms596176_SL3.0ch00_RYX-incomp-chim_SL3_120k-B-R1684-Map20
8848627	Cluster_58	SL3.0ch00	nc_RNA	8848352	8848627	+	N	Solyc06g024330		Gypsy	ms596176_SL3.0ch00_RYX-incomp-chim_SL3_120k-B-R1684-Map20
8849595	Cluster_59	SL3.0ch00	nc_RNA	8848712	8849595	+	N	Solyc06g024330		Gypsy	ms596179_SL3.0ch00_RYX-incomp-chim_SL3_120k-B-R1684-Map20
8855897	Cluster_60	SL3.0ch00	nc_RNA	8854470	8855897	+	N	Solyc00g010525
8884639	Cluster_61	SL3.0ch00	nc_RNA	8884399	8884639	+	N			Gypsy	ms596179_SL3.0ch00_RYX-incomp-chim_SL3_120k-B-R1684-Map20
8884639	Cluster_61	SL3.0ch00	nc_RNA	8884399	8884639	+	N			Gypsy	ms596179_SL3.0ch00_RYX-incomp-chim_SL3_120k-B-R1684-Map20
8885635	Cluster_62	SL3.0ch00	nc_RNA	8885151	8885635	+	N
8886310	Cluster_63	SL3.0ch00	nc_RNA	8885772	8886310	+	N			Copia	ms236671_SL3.0ch00_RLX-incomp_SL3_120k-B-R1190-Map8
8887088	Cluster_64	SL3.0ch00	nc_RNA	8886851	8887088	+	N			Gypsy	ms7924_SL3.0ch00_RLX-incomp_SL3_120k-B-R3383-Map9
8888201	Cluster_65	SL3.0ch00	nc_RNA	8887197	8888201	+	N			Gypsy	ms7924_SL3.0ch00_RLX-incomp_SL3_120k-B-R3383-Map9
8920484	Cluster_66	SL3.0ch00	nc_RNA	8919337	8920484	*	22
9120709	Cluster_67	SL3.0ch00	nc_RNA	9120509	9120709	+	N			Copia	ms28828_SL3.0ch00_RLX-comp_SL3_120k-B-G2041-Map6
9125466	Cluster_68	SL3.0ch00	nc_RNA	9124665	9125466	+	N			Gypsy	ms566983_SL3.0ch00_RLX-incomp-chim_SL3_120k-B-G1951-Map12_reversed
9126076	Cluster_69	SL3.0ch00	nc_RNA	9125922	9126076	*	N			Gypsy	ms10558_SL3.0ch00_RLX-incomp_SL3_120k-B-R676-Map11
9126854	Cluster_70	SL3.0ch00	nc_RNA	9126214	9126854	+	N			Gypsy	ms472832_SL3.0ch00_RYX-incomp-chim_SL3_120k-B-G2039-Map20
9128147	Cluster_71	SL3.0ch00	nc_RNA	9126977	9128147	+	N			Confused_TE_withPotentialHostGeneDomain	ms601283_SL3.0ch00_RLX-incomp_SL3_120k-B-R7791-Map20
9129249	Cluster_72	SL3.0ch00	nc_RNA	9129015	9129249	*	24			Gypsy	ms110105_SL3.0ch00_RYX-incomp-chim_SL3_120k-B-R1684-Map20
9132440	Cluster_73	SL3.0ch00	nc_RNA	9130526	9132440	+	N
9407458	Cluster_74	SL3.0ch00	nc_RNA	9406968	9407458	*	24
9553560	Cluster_75	SL3.0ch00	nc_RNA	9551725	9553560	-	N
9565859	Cluster_76	SL3.0ch00	nc_RNA	9564794	9565859	-	N
9721673	Cluster_77	SL3.0ch00	nc_RNA	9720830	9721673	*	N			Unclassified	ms175775_SL3.0ch00_noCat_SL3_120k-B-R1377-Map13
9729649	Cluster_78	SL3.0ch00	nc_RNA	9729150	9729649	-	N	Solyc00g013137	PROM_Solyc00g013133
9730487	Cluster_79	SL3.0ch00	nc_RNA	9730112	9730487	*	N		PROM_Solyc00g013137
9731522	Cluster_80	SL3.0ch00	nc_RNA	9730846	9731522	-	N		PROM_Solyc00g013137
9734618	Cluster_81	SL3.0ch00	nc_RNA	9734207	9734618	-	N
9738962	Cluster_82	SL3.0ch00	nc_RNA	9735103	9738962	-	N
9739533	Cluster_83	SL3.0ch00	nc_RNA	9739155	9739533	-	N		PROM_Solyc00g013140
9745915	Cluster_84	SL3.0ch00	nc_RNA	9740607	9745915	-	N
10014219	Cluster_85	SL3.0ch00	nc_RNA	10014018	10014219	-	N
10109722	Cluster_86	SL3.0ch00	nc_RNA	10108873	10109722	+	N		PROM_Solyc00g014790
10113523	Cluster_87	SL3.0ch00	nc_RNA	10109818	10113523	*	N
10115326	Cluster_88	SL3.0ch00	nc_RNA	10114264	10115326	*	N		PROM_Solyc00g014800
10115326	Cluster_88	SL3.0ch00	nc_RNA	10114264	10115326	*	N		PROM_Solyc00g014820
10116969	Cluster_89	SL3.0ch00	nc_RNA	10115403	10116969	*	21
10118274	Cluster_90	SL3.0ch00	nc_RNA	10117100	10118274	*	N
10124721	Cluster_91	SL3.0ch00	nc_RNA	10120099	10124721	-	N	Solyc00g014830
10129222	Cluster_92	SL3.0ch00	nc_RNA	10124808	10129222	*	N
10738123	Cluster_93	SL3.0ch00	nc_RNA	10737230	10738123	-	N
10821959	Cluster_94	SL3.0ch00	nc_RNA	10820369	10821959	-	N		PROM_Solyc00g019630
10828275	Cluster_95	SL3.0ch00	nc_RNA	10827144	10828275	*	N
10829714	Cluster_96	SL3.0ch00	nc_RNA	10828879	10829714	-	N
10832396	Cluster_97	SL3.0ch00	nc_RNA	10829850	10832396	-	N
10845649	Cluster_98	SL3.0ch00	nc_RNA	10844644	10845649	-	N		PROM_Solyc00g019970
10856654	Cluster_99	SL3.0ch00	nc_RNA	10845798	10856654	*	N
10942564	Cluster_100	SL3.0ch00	nc_RNA	10942188	10942564	-	24			Gypsy	ms372657_SL3.0ch00_RLX-incomp_SL3_120k-B-R7097-Map7
10947050	Cluster_101	SL3.0ch00	nc_RNA	10946508	10947050	*	24		PROM_Solyc00g020545
11019713	Cluster_102	SL3.0ch00	nc_RNA	11013554	11019713	-	N
11020648	Cluster_103	SL3.0ch00	nc_RNA	11019864	11020648	-	N		PROM_Solyc00g021640
11022227	Cluster_104	SL3.0ch00	nc_RNA	11020751	11022227	*	24
11054753	Cluster_105	SL3.0ch00	nc_RNA	11052898	11054753	*	N
11062433	Cluster_106	SL3.0ch00	nc_RNA	11055128	11062433	-	N
11149260	Cluster_107	SL3.0ch00	nc_RNA	11149061	11149260	*	24
11149645	Cluster_108	SL3.0ch00	nc_RNA	11149351	11149645	-	24
11155084	Cluster_109	SL3.0ch00	nc_RNA	11154638	11155084	*	24			Gypsy	ms78209_SL3.0ch00_RYX-incomp-chim_SL3_120k-B-R1684-Map20
11156331	Cluster_110	SL3.0ch00	nc_RNA	11155183	11156331	*	24
11180006	Cluster_111	SL3.0ch00	nc_RNA	11179010	11180006	*	24
11190498	Cluster_112	SL3.0ch00	nc_RNA	11183225	11190498	*	N
11194469	Cluster_113	SL3.0ch00	nc_RNA	11192873	11194469	*	N
11195632	Cluster_114	SL3.0ch00	nc_RNA	11194551	11195632	*	N
11197596	Cluster_115	SL3.0ch00	nc_RNA	11197000	11197596	*	22
11200191	Cluster_116	SL3.0ch00	nc_RNA	11199369	11200191	*	N
11226280	Cluster_117	SL3.0ch00	nc_RNA	11226026	11226280	-	24		PROM_Solyc00g024040	Gypsy	ms78209_SL3.0ch00_RYX-incomp-chim_SL3_120k-B-R1684-Map20
11226280	Cluster_117	SL3.0ch00	nc_RNA	11226026	11226280	-	24		PROM_Solyc00g024150	Gypsy	ms78209_SL3.0ch00_RYX-incomp-chim_SL3_120k-B-R1684-Map20
11232834	Cluster_118	SL3.0ch00	nc_RNA	11232238	11232834	*	24
11285266	Cluster_119	SL3.0ch00	nc_RNA	11285124	11285266	-	22			Gypsy	ms78209_SL3.0ch00_RYX-incomp-chim_SL3_120k-B-R1684-Map20
11317555	Cluster_120	SL3.0ch00	nc_RNA	11313437	11317555	+	N
11319929	Cluster_121	SL3.0ch00	nc_RNA	11317671	11319929	*	N
11320723	Cluster_122	SL3.0ch00	nc_RNA	11320051	11320723	*	21
11321810	Cluster_123	SL3.0ch00	nc_RNA	11320835	11321810	*	N
11324522	Cluster_124	SL3.0ch00	nc_RNA	11322720	11324522	-	N
11328230	Cluster_125	SL3.0ch00	nc_RNA	11324708	11328230	*	N
11374962	Cluster_126	SL3.0ch00	nc_RNA	11374425	11374962	*	24	Solyc00g026160
11376579	Cluster_127	SL3.0ch00	nc_RNA	11376092	11376579	*	24	Solyc00g026160		Unclassified	ms45560_SL3.0ch00_noCat_SL3_120k-B-R283-Map20
11379631	Cluster_128	SL3.0ch00	nc_RNA	11378967	11379631	-	24
11385118	Cluster_129	SL3.0ch00	nc_RNA	11384676	11385118	*	23			EPRV	ms602629_SL3.0ch00_RLX-incomp_SL3_120k-B-G2038-Map13_reversed
11385118	Cluster_129	SL3.0ch00	nc_RNA	11384676	11385118	*	23			put_hAT	ms602722_SL3.0ch00_DTX-incomp_SL3_120k-B-R325-Map20
11458806	Cluster_130	SL3.0ch00	nc_RNA	11458689	11458806	*	24			Gypsy	ms45711_SL3.0ch00_RLX-incomp_SL3_120k-B-R3378-Map7_reversed
11468285	Cluster_131	SL3.0ch00	nc_RNA	11468128	11468285	+	22		PROM_Solyc00g027640	EPRV	ms209941_SL3.0ch00_RLX-incomp_SL3_120k-B-G94-Map20_reversed
11568344	Cluster_132	SL3.0ch00	nc_RNA	11568030	11568344	-	24	Solyc00g029190		Gypsy	ms209973_SL3.0ch00_RYX-incomp-chim_SL3_120k-B-R1684-Map20
11571884	Cluster_133	SL3.0ch00	nc_RNA	11571661	11571884	*	24
11580722	Cluster_134	SL3.0ch00	nc_RNA	11580456	11580722	*	24
11584136	Cluster_135	SL3.0ch00	nc_RNA	11583842	11584136	+	21
11622899	Cluster_136	SL3.0ch00	nc_RNA	11622145	11622899	*	24	Solyc00g030000
11623474	Cluster_137	SL3.0ch00	nc_RNA	11623090	11623474	*	24	Solyc00g030000
11624291	Cluster_138	SL3.0ch00	nc_RNA	11623854	11624291	-	24	Solyc00g030000	PROM_Solyc00g030000
11625344	Cluster_139	SL3.0ch00	nc_RNA	11624718	11625344	*	24		PROM_Solyc00g030000
11625344	Cluster_139	SL3.0ch00	nc_RNA	11624718	11625344	*	24		PROM_Solyc00g030100
11626192	Cluster_140	SL3.0ch00	nc_RNA	11625831	11626192	-	N		PROM_Solyc00g030100	Gypsy	ms209973_SL3.0ch00_RYX-incomp-chim_SL3_120k-B-R1684-Map20
11642912	Cluster_141	SL3.0ch00	nc_RNA	11642771	11642912	*	24	Solyc00g030215
11653421	Cluster_142	SL3.0ch00	nc_RNA	11653202	11653421	*	24	Solyc00g030510
11677898	Cluster_143	SL3.0ch00	nc_RNA	11676636	11677898	-	22
11679991	Cluster_144	SL3.0ch00	nc_RNA	11678984	11679991	*	24
11758426	Cluster_145	SL3.0ch00	nc_RNA	11758001	11758426	*	24
11830618	Cluster_146	SL3.0ch00	nc_RNA	11830299	11830618	+	24	Solyc00g032947
11842512	Cluster_147	SL3.0ch00	nc_RNA	11842019	11842512	*	24
11989539	Cluster_148	SL3.0ch00	nc_RNA	11988725	11989539	*	24
12001533	Cluster_149	SL3.0ch00	nc_RNA	12000005	12001533	*	N
12002254	Cluster_150	SL3.0ch00	nc_RNA	12001641	12002254	*	N
12003804	Cluster_151	SL3.0ch00	nc_RNA	12002574	12003804	*	N
12005019	Cluster_152	SL3.0ch00	nc_RNA	12003894	12005019	*	N		PROM_Solyc00g036530
12056790	Cluster_153	SL3.0ch00	nc_RNA	12056312	12056790	-	23			Gypsy	ms209973_SL3.0ch00_RYX-incomp-chim_SL3_120k-B-R1684-Map20
12084161	Cluster_154	SL3.0ch00	nc_RNA	12084009	12084161	-	N			TRIM_LARD	ms209993_SL3.0ch00_DTX-incomp-chim_SL3_120k-B-R3849-Map6
12084161	Cluster_154	SL3.0ch00	nc_RNA	12084009	12084161	-	N			Gypsy	ms603354_SL3.0ch00_RLX-incomp_SL3_120k-B-R1902-Map10_reversed
12084504	Cluster_155	SL3.0ch00	nc_RNA	12084401	12084504	-	N			HostGene	ms13968_SL3.0ch00_PotentialHostGene_SL3_120k-B-R7815-Map13
12084504	Cluster_155	SL3.0ch00	nc_RNA	12084401	12084504	-	N			Gypsy	ms309003_SL3.0ch00_RYX-incomp-chim_SL3_120k-B-R1684-Map20
12084994	Cluster_156	SL3.0ch00	nc_RNA	12084768	12084994	-	N				ms309003_SL3.0ch00_RYX-incomp-chim_SL3_120k-B-R1684-Map20-exon1
12084994	Cluster_156	SL3.0ch00	nc_RNA	12084768	12084994	-	N			Gypsy	ms604195_SL3.0ch00_RLX-incomp_SL3_120k-B-R3347-Map7_reversed
12085816	Cluster_157	SL3.0ch00	nc_RNA	12085200	12085816	-	N			TIR_MITEov10	ms24511_SL3.0ch00_DXX-MITE_SL3_120k-B-G372-Map9
12085816	Cluster_157	SL3.0ch00	nc_RNA	12085200	12085816	-	N			Gypsy	ms254863_SL3.0ch00_RLX-incomp_SL3_120k-B-G2080-Map10_reversed
12086485	Cluster_158	SL3.0ch00	nc_RNA	12086110	12086485	-	N			Copia	ms15715_SL3.0ch00_RLX-incomp_SL3_120k-B-R1190-Map8
12086485	Cluster_158	SL3.0ch00	nc_RNA	12086110	12086485	-	N			Copia	ms409135_SL3.0ch00_RLX-comp_SL3_120k-B-G2035-Map20
12154288	Cluster_159	SL3.0ch00	nc_RNA	12153927	12154288	-	24
12235854	Cluster_160	SL3.0ch00	nc_RNA	12234432	12235854	*	24
12362186	Cluster_161	SL3.0ch00	nc_RNA	12361846	12362186	*	24			Gypsy	ms409200_SL3.0ch00_RYX-incomp-chim_SL3_120k-B-R1684-Map20
12396141	Cluster_162	SL3.0ch00	nc_RNA	12395845	12396141	*	24			Gypsy	ms409200_SL3.0ch00_RYX-incomp-chim_SL3_120k-B-R1684-Map20
12414635	Cluster_163	SL3.0ch00	nc_RNA	12414235	12414635	*	N
12415733	Cluster_164	SL3.0ch00	nc_RNA	12415416	12415733	-	24
12422027	Cluster_165	SL3.0ch00	nc_RNA	12421552	12422027	-	N		PROM_Solyc00g044550
12423578	Cluster_166	SL3.0ch00	nc_RNA	12423177	12423578	-	N
12439321	Cluster_167	SL3.0ch00	nc_RNA	12439128	12439321	-	23
12451327	Cluster_168	SL3.0ch00	nc_RNA	12450669	12451327	+	N			Gypsy	ms409200_SL3.0ch00_RYX-incomp-chim_SL3_120k-B-R1684-Map20
12451680	Cluster_169	SL3.0ch00	nc_RNA	12451424	12451680	+	N			Gypsy	ms409200_SL3.0ch00_RYX-incomp-chim_SL3_120k-B-R1684-Map20
12452466	Cluster_170	SL3.0ch00	nc_RNA	12452239	12452466	+	N				ms409200_SL3.0ch00_RYX-incomp-chim_SL3_120k-B-R1684-Map20-exon1
12526499	Cluster_171	SL3.0ch00	nc_RNA	12526259	12526499	+	24
12554753	Cluster_172	SL3.0ch00	nc_RNA	12554527	12554753	-	N
12584942	Cluster_173	SL3.0ch00	nc_RNA	12583500	12584942	-	22
12617003	Cluster_174	SL3.0ch00	nc_RNA	12616212	12617003	*	24	Solyc00g048510
12619002	Cluster_175	SL3.0ch00	nc_RNA	12618567	12619002	*	24
12619978	Cluster_176	SL3.0ch00	nc_RNA	12619559	12619978	+	24
12654299	Cluster_177	SL3.0ch00	nc_RNA	12651410	12654299	-	N
12680657	Cluster_178	SL3.0ch00	nc_RNA	12680238	12680657	*	24
12681722	Cluster_179	SL3.0ch00	nc_RNA	12680939	12681722	*	24
12682366	Cluster_180	SL3.0ch00	nc_RNA	12682174	12682366	*	24				ms409200_SL3.0ch00_RYX-incomp-chim_SL3_120k-B-R1684-Map20-exon1
12698178	Cluster_181	SL3.0ch00	nc_RNA	12697861	12698178	*	N
12705891	Cluster_182	SL3.0ch00	nc_RNA	12705849	12705891	-	24				ms409200_SL3.0ch00_RYX-incomp-chim_SL3_120k-B-R1684-Map20-exon2
12748710	Cluster_183	SL3.0ch00	nc_RNA	12748240	12748710	*	24			Gypsy	ms409201_SL3.0ch00_RYX-incomp-chim_SL3_120k-B-R1684-Map20
12760074	Cluster_184	SL3.0ch00	nc_RNA	12758863	12760074	*	22
12814417	Cluster_185	SL3.0ch00	nc_RNA	12811008	12814417	+	N
12815514	Cluster_186	SL3.0ch00	nc_RNA	12814515	12815514	*	N
12855162	Cluster_187	SL3.0ch00	nc_RNA	12854799	12855162	*	24			Gypsy	ms409201_SL3.0ch00_RYX-incomp-chim_SL3_120k-B-R1684-Map20
12857915	Cluster_188	SL3.0ch00	nc_RNA	12857320	12857915	+	N	Solyc00g053440
12858990	Cluster_189	SL3.0ch00	nc_RNA	12857990	12858990	+	N
12993976	Cluster_190	SL3.0ch00	nc_RNA	12993552	12993976	*	24			Gypsy	ms409201_SL3.0ch00_RYX-incomp-chim_SL3_120k-B-R1684-Map20
12998404	Cluster_191	SL3.0ch00	nc_RNA	12998171	12998404	*	24
13006308	Cluster_192	SL3.0ch00	nc_RNA	13006133	13006308	*	24
13057020	Cluster_193	SL3.0ch00	nc_RNA	13056657	13057020	*	22			Gypsy	ms409201_SL3.0ch00_RYX-incomp-chim_SL3_120k-B-R1684-Map20
13060471	Cluster_194	SL3.0ch00	nc_RNA	13059650	13060471	*	22		PROM_Solyc00g057880
13071800	Cluster_195	SL3.0ch00	nc_RNA	13070924	13071800	*	24			Gypsy	ms409201_SL3.0ch00_RYX-incomp-chim_SL3_120k-B-R1684-Map20
13080595	Cluster_196	SL3.0ch00	nc_RNA	13080277	13080595	+	24				ms409201_SL3.0ch00_RYX-incomp-chim_SL3_120k-B-R1684-Map20-exon1
13107710	Cluster_197	SL3.0ch00	nc_RNA	13107396	13107710	+	24
13111249	Cluster_198	SL3.0ch00	nc_RNA	13110993	13111249	*	24		PROM_Solyc00g058900
13117687	Cluster_199	SL3.0ch00	nc_RNA	13116432	13117687	*	24
13131205	Cluster_200	SL3.0ch00	nc_RNA	13130730	13131205	*	24				ms409201_SL3.0ch00_RYX-incomp-chim_SL3_120k-B-R1684-Map20-exon1
13132145	Cluster_201	SL3.0ch00	nc_RNA	13131883	13132145	+	24				ms409201_SL3.0ch00_RYX-incomp-chim_SL3_120k-B-R1684-Map20-exon1
13196399	Cluster_202	SL3.0ch00	nc_RNA	13195625	13196399	-	N	Solyc00g060810
13197233	Cluster_203	SL3.0ch00	nc_RNA	13196822	13197233	*	24	Solyc00g060810
13217828	Cluster_204	SL3.0ch00	nc_RNA	13217553	13217828	*	24
13219177	Cluster_205	SL3.0ch00	nc_RNA	13218579	13219177	-	24
13281001	Cluster_206	SL3.0ch00	nc_RNA	13280205	13281001	*	24				ms409201_SL3.0ch00_RYX-incomp-chim_SL3_120k-B-R1684-Map20-exon1
13301055	Cluster_207	SL3.0ch00	nc_RNA	13300665	13301055	*	24	Solyc00g063110			ms409201_SL3.0ch00_RYX-incomp-chim_SL3_120k-B-R1684-Map20-exon2
13303369	Cluster_208	SL3.0ch00	nc_RNA	13302999	13303369	*	24		PROM_Solyc00g063110
13306692	Cluster_209	SL3.0ch00	nc_RNA	13306381	13306692	+	24
13418161	Cluster_210	SL3.0ch00	nc_RNA	13417921	13418161	*	24			PutativeNoutoClassII	ms81563_SL3.0ch00_DXX_SL3_120k-B-R2407-Map6
13420025	Cluster_211	SL3.0ch00	nc_RNA	13419783	13420025	*	24			Gypsy	ms343959_SL3.0ch00_RYX-incomp-chim_SL3_120k-B-R8311-Map5_reversed
13438570	Cluster_212	SL3.0ch00	nc_RNA	13438366	13438570	*	23		PROM_Solyc00g066155
13438570	Cluster_212	SL3.0ch00	nc_RNA	13438366	13438570	*	23		PROM_Solyc00g066350
13497454	Cluster_213	SL3.0ch00	nc_RNA	13496900	13497454	*	24
13500662	Cluster_214	SL3.0ch00	nc_RNA	13500400	13500662	*	24			HostGene	ms343998_SL3.0ch00_SSR_SL3_120k-B-R1705-Map8
13513689	Cluster_215	SL3.0ch00	nc_RNA	13513529	13513689	*	24			Gypsy	ms344019_SL3.0ch00_RLX-incomp_SL3_120k-B-R35-Map14
13554624	Cluster_216	SL3.0ch00	nc_RNA	13553590	13554624	+	N		PROM_Solyc00g068980
13555396	Cluster_217	SL3.0ch00	nc_RNA	13554738	13555396	+	N
13591740	Cluster_218	SL3.0ch00	nc_RNA	13591575	13591740	+	24		PROM_Solyc00g069880	Confused_TE_withPotentialHostGeneDomain	ms52022_SL3.0ch00_RXX_SL3_120k-B-R2153-Map8
13596639	Cluster_219	SL3.0ch00	nc_RNA	13592441	13596639	*	N
13613136	Cluster_220	SL3.0ch00	nc_RNA	13612409	13613136	+	22			EPRV	ms149209_SL3.0ch00_RLX-incomp_SL3_120k-B-G1815-Map7
13613814	Cluster_221	SL3.0ch00	nc_RNA	13613274	13613814	*	22			put_hAT	ms608333_SL3.0ch00_DTX-comp_SL3_120k-B-P509.143-Map7_reversed
13652331	Cluster_222	SL3.0ch00	nc_RNA	13652272	13652331	-	24		PROM_Solyc00g071180
13688643	Cluster_223	SL3.0ch00	nc_RNA	13687930	13688643	*	24
13712794	Cluster_224	SL3.0ch00	nc_RNA	13712683	13712794	*	24				ms608333_SL3.0ch00_DTX-comp_SL3_120k-B-P509.143-Map7_reversed-exon1
13730354	Cluster_225	SL3.0ch00	nc_RNA	13729651	13730354	*	24			Copia	ms608345_SL3.0ch00_RYX-incomp-chim_SL3_120k-B-G180-Map20_reversed
13783415	Cluster_226	SL3.0ch00	nc_RNA	13783118	13783415	*	24			Gypsy	ms121894_SL3.0ch00_RIX-incomp-chim_SL3_120k-B-R4047-Map5
14050424	Cluster_227	SL3.0ch00	nc_RNA	14050373	14050424	*	24		PROM_Solyc00g080750
14074377	Cluster_228	SL3.0ch00	nc_RNA	14074147	14074377	*	24
14122642	Cluster_229	SL3.0ch00	nc_RNA	14120426	14122642	-	N				ms121894_SL3.0ch00_RIX-incomp-chim_SL3_120k-B-R4047-Map5-exon2
14371973	Cluster_230	SL3.0ch00	nc_RNA	14371789	14371973	*	N
14392738	Cluster_231	SL3.0ch00	nc_RNA	14391969	14392738	+	N
14426477	Cluster_232	SL3.0ch00	nc_RNA	14425798	14426477	*	24	Solyc00g090115
14481816	Cluster_233	SL3.0ch00	nc_RNA	14481076	14481816	*	24			EPRV	ms3146_SL3.0ch00_RLX-incomp_SL3_120k-B-R1655-Map20
14588810	Cluster_234	SL3.0ch00	nc_RNA	14585131	14588810	-	N
14589614	Cluster_235	SL3.0ch00	nc_RNA	14589310	14589614	-	24		PROM_Solyc00g094550
14635995	Cluster_236	SL3.0ch00	nc_RNA	14635924	14635995	-	24
14663405	Cluster_237	SL3.0ch00	nc_RNA	14663178	14663405	*	24			EPRV	ms3146_SL3.0ch00_RLX-incomp_SL3_120k-B-R1655-Map20
14663405	Cluster_237	SL3.0ch00	nc_RNA	14663178	14663405	*	24			Confused_TE_withPotentialHostGeneDomain	ms19325_SL3.0ch00_RLX-incomp_SL3_120k-B-R5-Map20_reversed
14674609	Cluster_238	SL3.0ch00	nc_RNA	14674405	14674609	+	23
14715541	Cluster_239	SL3.0ch00	nc_RNA	14715440	14715541	+	N		PROM_Solyc00g097960
14720635	Cluster_240	SL3.0ch00	nc_RNA	14719930	14720635	*	24
14729755	Cluster_241	SL3.0ch00	nc_RNA	14729483	14729755	+	N
14732081	Cluster_242	SL3.0ch00	nc_RNA	14731728	14732081	+	23			Unclassified	ms445872_SL3.0ch00_noCat_SL3_120k-B-R4-Map18
14737371	Cluster_243	SL3.0ch00	nc_RNA	14737016	14737371	*	23
14740607	Cluster_244	SL3.0ch00	nc_RNA	14740378	14740607	-	24
14826485	Cluster_245	SL3.0ch00	nc_RNA	14826242	14826485	*	24
14864037	Cluster_246	SL3.0ch00	nc_RNA	14863293	14864037	+	N
14873760	Cluster_247	SL3.0ch00	nc_RNA	14873342	14873760	*	N
14969934	Cluster_248	SL3.0ch00	nc_RNA	14969692	14969934	*	24		PROM_Solyc00g104940
14970418	Cluster_249	SL3.0ch00	nc_RNA	14970026	14970418	*	24		PROM_Solyc00g104940
14972755	Cluster_250	SL3.0ch00	nc_RNA	14972092	14972755	*	24
15045060	Cluster_251	SL3.0ch00	nc_RNA	15044460	15045060	*	24
15060472	Cluster_252	SL3.0ch00	nc_RNA	15059616	15060472	*	24
15072742	Cluster_253	SL3.0ch00	nc_RNA	15069777	15072742	-	N			Gypsy	ms610175_SL3.0ch00_RYX-incomp-chim_SL3_120k-B-R1684-Map20
15099679	Cluster_254	SL3.0ch00	nc_RNA	15098615	15099679	*	N
15100922	Cluster_255	SL3.0ch00	nc_RNA	15100274	15100922	+	N
15101774	Cluster_256	SL3.0ch00	nc_RNA	15101160	15101774	+	N
15141271	Cluster_257	SL3.0ch00	nc_RNA	15140460	15141271	*	24
15213573	Cluster_258	SL3.0ch00	nc_RNA	15212931	15213573	*	24
15214413	Cluster_259	SL3.0ch00	nc_RNA	15214119	15214413	*	24		PROM_Solyc00g111780	Gypsy	ms610175_SL3.0ch00_RYX-incomp-chim_SL3_120k-B-R1684-Map20
15217123	Cluster_260	SL3.0ch00	nc_RNA	15216454	15217123	*	24				ms610175_SL3.0ch00_RYX-incomp-chim_SL3_120k-B-R1684-Map20-exon1
15229274	Cluster_261	SL3.0ch00	nc_RNA	15227081	15229274	*	N
15323616	Cluster_262	SL3.0ch00	nc_RNA	15323317	15323616	*	24			Gypsy	ms610176_SL3.0ch00_RYX-incomp-chim_SL3_120k-B-R1684-Map20
15417409	Cluster_263	SL3.0ch00	nc_RNA	15417391	15417409	-	N
15447816	Cluster_264	SL3.0ch00	nc_RNA	15444462	15447816	+	N
15490446	Cluster_265	SL3.0ch00	nc_RNA	15489949	15490446	+	24
15530116	Cluster_266	SL3.0ch00	nc_RNA	15529766	15530116	*	24
15540412	Cluster_267	SL3.0ch00	nc_RNA	15539620	15540412	*	24
15596463	Cluster_268	SL3.0ch00	nc_RNA	15595356	15596463	*	22
15684257	Cluster_269	SL3.0ch00	nc_RNA	15683150	15684257	*	N
15684743	Cluster_270	SL3.0ch00	nc_RNA	15684350	15684743	+	N	Solyc00g125990	PROM_Solyc00g126010
15684743	Cluster_270	SL3.0ch00	nc_RNA	15684350	15684743	+	N	Solyc00g125990	PROM_Solyc00g126000
15685671	Cluster_271	SL3.0ch00	nc_RNA	15684904	15685671	*	N		PROM_Solyc00g126010
15686247	Cluster_272	SL3.0ch00	nc_RNA	15685756	15686247	*	N
15794994	Cluster_273	SL3.0ch00	nc_RNA	15794878	15794994	+	24	Solyc00g128875		Gypsy	ms610176_SL3.0ch00_RYX-incomp-chim_SL3_120k-B-R1684-Map20
15884381	Cluster_274	SL3.0ch00	nc_RNA	15884235	15884381	+	23			Gypsy	ms610176_SL3.0ch00_RYX-incomp-chim_SL3_120k-B-R1684-Map20
15926849	Cluster_275	SL3.0ch00	nc_RNA	15926138	15926849	+	N
16015792	Cluster_276	SL3.0ch00	nc_RNA	16014645	16015792	-	N
16060670	Cluster_277	SL3.0ch00	nc_RNA	16060263	16060670	+	N
16080504	Cluster_278	SL3.0ch00	nc_RNA	16079988	16080504	*	24
16175317	Cluster_279	SL3.0ch00	nc_RNA	16175092	16175317	+	24			Gypsy	ms610176_SL3.0ch00_RYX-incomp-chim_SL3_120k-B-R1684-Map20
16177857	Cluster_280	SL3.0ch00	nc_RNA	16177651	16177857	-	24			Gypsy	ms577462_SL3.0ch00_RLX-incomp_SL3_120k-B-R35-Map14
16177857	Cluster_280	SL3.0ch00	nc_RNA	16177651	16177857	-	24				ms577462_SL3.0ch00_RLX-incomp_SL3_120k-B-R35-Map14-exon2
16204787	Cluster_281	SL3.0ch00	nc_RNA	16202039	16204787	*	N
16229542	Cluster_282	SL3.0ch00	nc_RNA	16229192	16229542	+	N			Gypsy	ms184350_SL3.0ch00_RYX-incomp-chim_SL3_120k-B-G37-Map5_reversed
16229908	Cluster_283	SL3.0ch00	nc_RNA	16229626	16229908	+	N			MuDR	ms282659_SL3.0ch00_DTX-incomp_SL3_120k-B-R1380-Map10
16266799	Cluster_284	SL3.0ch00	nc_RNA	16266628	16266799	*	24
16267309	Cluster_285	SL3.0ch00	nc_RNA	16267111	16267309	+	N
16362294	Cluster_286	SL3.0ch00	nc_RNA	16361937	16362294	+	24
16364071	Cluster_287	SL3.0ch00	nc_RNA	16363786	16364071	*	24
16549366	Cluster_288	SL3.0ch00	nc_RNA	16549080	16549366	-	24
16569720	Cluster_289	SL3.0ch00	nc_RNA	16569122	16569720	*	N		PROM_Solyc00g153980
16571115	Cluster_290	SL3.0ch00	nc_RNA	16569812	16571115	*	N
16571697	Cluster_291	SL3.0ch00	nc_RNA	16571217	16571697	*	N
16585342	Cluster_292	SL3.0ch00	nc_RNA	16584959	16585342	*	N
16587169	Cluster_293	SL3.0ch00	nc_RNA	16586099	16587169	*	24		PROM_Solyc00g154480
16613999	Cluster_294	SL3.0ch00	nc_RNA	16613301	16613999	*	24			SAT	ms3564_SL3.0ch00_RXX-TRIM_SL3_120k-B-G2068-Map9
16616485	Cluster_295	SL3.0ch00	nc_RNA	16615616	16616485	*	24
16625472	Cluster_296	SL3.0ch00	nc_RNA	16625160	16625472	*	24
16664072	Cluster_297	SL3.0ch00	nc_RNA	16663684	16664072	*	24	Solyc00g157083
16664072	Cluster_297	SL3.0ch00	nc_RNA	16663684	16664072	*	24	Solyc00g157080
16745381	Cluster_298	SL3.0ch00	nc_RNA	16744950	16745381	-	N
16776872	Cluster_299	SL3.0ch00	nc_RNA	16776227	16776872	-	N
16881104	Cluster_300	SL3.0ch00	nc_RNA	16880690	16881104	+	N
16888062	Cluster_301	SL3.0ch00	nc_RNA	16886582	16888062	*	N
16889426	Cluster_302	SL3.0ch00	nc_RNA	16888142	16889426	*	N		PROM_Solyc00g164680
16922831	Cluster_303	SL3.0ch00	nc_RNA	16922221	16922831	*	24			Gypsy	ms54276_SL3.0ch00_RYX-incomp-chim_SL3_120k-B-R1684-Map20
17015673	Cluster_304	SL3.0ch00	nc_RNA	17015313	17015673	-	N
17093915	Cluster_305	SL3.0ch00	nc_RNA	17093642	17093915	*	24		PROM_Solyc00g171710	Unclassified	ms382140_SL3.0ch00_noCat_SL3_120k-B-R1877-Map8
17098961	Cluster_306	SL3.0ch00	nc_RNA	17096534	17098961	-	N
17157842	Cluster_307	SL3.0ch00	nc_RNA	17157160	17157842	+	N			EPRV	ms218651_SL3.0ch00_RLX-incomp_SL3_120k-B-G1815-Map7
17159302	Cluster_308	SL3.0ch00	nc_RNA	17158340	17159302	+	N			Gypsy	ms218798_SL3.0ch00_RLX-incomp_SL3_120k-B-R4207-Map20_reversed
17159858	Cluster_309	SL3.0ch00	nc_RNA	17159502	17159858	+	N			Harbinger	ms612053_SL3.0ch00_DTX-incomp_SL3_120k-B-R175-Map20
17166707	Cluster_310	SL3.0ch00	nc_RNA	17165961	17166707	*	24	Solyc00g174330
17168165	Cluster_311	SL3.0ch00	nc_RNA	17167317	17168165	*	N	Solyc00g174340
17204591	Cluster_312	SL3.0ch00	nc_RNA	17204371	17204591	*	24
17318647	Cluster_313	SL3.0ch00	nc_RNA	17317268	17318647	-	N			Copia	ms612913_SL3.0ch00_RLX-incomp_SL3_120k-B-G1823-Map20
17318647	Cluster_313	SL3.0ch00	nc_RNA	17317268	17318647	-	N			HostGene	ms166612_SL3.0ch00_PotentialHostGene_SL3_120k-B-R7815-Map13
17318892	Cluster_314	SL3.0ch00	nc_RNA	17318791	17318892	-	N				ms140439_SL3.0ch00_RLX-comp_SL3_120k-B-G251-Map7_reversed-exon1
17318892	Cluster_314	SL3.0ch00	nc_RNA	17318791	17318892	-	N			Copia	ms140439_SL3.0ch00_RLX-comp_SL3_120k-B-G251-Map7_reversed
17319361	Cluster_315	SL3.0ch00	nc_RNA	17319051	17319361	-	N			Gypsy	ms122001_SL3.0ch00_RLX-incomp-chim_SL3_120k-B-R223-Map6_reversed
17319844	Cluster_316	SL3.0ch00	nc_RNA	17319480	17319844	-	N			Gypsy	ms140504_SL3.0ch00_RLX-incomp-chim_SL3_120k-B-G1951-Map12_reversed
17319844	Cluster_316	SL3.0ch00	nc_RNA	17319480	17319844	-	N			Copia	ms56763_SL3.0ch00_RLX-incomp_SL3_120k-B-G191-Map20
17342188	Cluster_317	SL3.0ch00	nc_RNA	17341995	17342188	*	N	Solyc00g180440
17348111	Cluster_318	SL3.0ch00	nc_RNA	17347743	17348111	*	24			Gypsy	ms89815_SL3.0ch00_RYX-incomp-chim_SL3_120k-B-R1684-Map20
17353170	Cluster_319	SL3.0ch00	nc_RNA	17353125	17353170	*	24	Solyc00g180840
17353602	Cluster_320	SL3.0ch00	nc_RNA	17353420	17353602	+	24
17363764	Cluster_321	SL3.0ch00	nc_RNA	17362894	17363764	*	N
17364884	Cluster_322	SL3.0ch00	nc_RNA	17363898	17364884	*	N		PROM_Solyc00g181240
17391511	Cluster_323	SL3.0ch00	nc_RNA	17391192	17391511	*	24
17392837	Cluster_324	SL3.0ch00	nc_RNA	17392120	17392837	*	24
17401632	Cluster_325	SL3.0ch00	nc_RNA	17398925	17401632	*	N
17423899	Cluster_326	SL3.0ch00	nc_RNA	17423845	17423899	+	24			Gypsy	ms89815_SL3.0ch00_RYX-incomp-chim_SL3_120k-B-R1684-Map20
17499253	Cluster_327	SL3.0ch00	nc_RNA	17498147	17499253	*	24
17515217	Cluster_328	SL3.0ch00	nc_RNA	17514582	17515217	*	24			Gypsy	ms89815_SL3.0ch00_RYX-incomp-chim_SL3_120k-B-R1684-Map20
17571121	Cluster_329	SL3.0ch00	nc_RNA	17570567	17571121	+	24
17599123	Cluster_330	SL3.0ch00	nc_RNA	17598685	17599123	*	24
17645899	Cluster_331	SL3.0ch00	nc_RNA	17645693	17645899	*	24			Confused_TE	ms184429_SL3.0ch00_RIX-incomp_SL3_120k-B-R1553-Map20
17646157	Cluster_332	SL3.0ch00	nc_RNA	17646000	17646157	*	24
17719910	Cluster_333	SL3.0ch00	nc_RNA	17719543	17719910	*	24			SAT	ms254631_SL3.0ch00_RXX-TRIM_SL3_120k-B-R86-Map20
17846759	Cluster_334	SL3.0ch00	nc_RNA	17846001	17846759	*	24
17856019	Cluster_335	SL3.0ch00	nc_RNA	17855706	17856019	*	24				ms254631_SL3.0ch00_RXX-TRIM_SL3_120k-B-R86-Map20-exon1
17906405	Cluster_336	SL3.0ch00	nc_RNA	17906294	17906405	*	24		PROM_Solyc00g201060	Confused_TE	ms254934_SL3.0ch00_RIX-incomp_SL3_120k-B-R1553-Map20
17977487	Cluster_337	SL3.0ch00	nc_RNA	17976429	17977487	-	N
18094675	Cluster_338	SL3.0ch00	nc_RNA	18094478	18094675	-	N
18169018	Cluster_339	SL3.0ch00	nc_RNA	18167020	18169018	*	N
18244625	Cluster_340	SL3.0ch00	nc_RNA	18244005	18244625	*	24
18430108	Cluster_341	SL3.0ch00	nc_RNA	18429863	18430108	*	24				ms254934_SL3.0ch00_RIX-incomp_SL3_120k-B-R1553-Map20-exon1
18585180	Cluster_342	SL3.0ch00	nc_RNA	18584515	18585180	*	24
18611523	Cluster_343	SL3.0ch00	nc_RNA	18611329	18611523	+	24
18661002	Cluster_344	SL3.0ch00	nc_RNA	18659751	18661002	*	N
18662134	Cluster_345	SL3.0ch00	nc_RNA	18661101	18662134	*	N		PROM_Solyc00g230070
18671410	Cluster_346	SL3.0ch00	nc_RNA	18670508	18671410	*	24
18703258	Cluster_347	SL3.0ch00	nc_RNA	18703041	18703258	-	N	Solyc00g231780	PROM_Solyc00g231680
18735296	Cluster_348	SL3.0ch00	nc_RNA	18735008	18735296	+	24
18953561	Cluster_349	SL3.0ch00	nc_RNA	18953187	18953561	*	24			Unclassified	ms31572_SL3.0ch00_noCat_SL3_120k-B-R1318-Map7
18963738	Cluster_350	SL3.0ch00	nc_RNA	18962571	18963738	*	N			Gypsy	ms615535_SL3.0ch00_RLX-incomp_SL3_120k-B-R3590-Map5
18979063	Cluster_351	SL3.0ch00	nc_RNA	18977917	18979063	*	24			TIR_MITEov10	ms125105_SL3.0ch00_DXX-MITE_SL3_120k-B-R3744-Map5
18982585	Cluster_352	SL3.0ch00	nc_RNA	18982101	18982585	*	24			Unclassified	ms158094_SL3.0ch00_noCat_SL3_120k-B-R7057-Map5
18982585	Cluster_352	SL3.0ch00	nc_RNA	18982101	18982585	*	24			TIR_MITEov10	ms400274_SL3.0ch00_DTX-incomp_SL3_120k-B-G1586-Map7
19011745	Cluster_353	SL3.0ch00	nc_RNA	19011351	19011745	*	N		PROM_Solyc00g244280
19013445	Cluster_354	SL3.0ch00	nc_RNA	19013151	19013445	+	N		PROM_Solyc00g244290
19071353	Cluster_355	SL3.0ch00	nc_RNA	19070986	19071353	-	24			Gypsy	ms519342_SL3.0ch00_RYX-incomp-chim_SL3_120k-B-P147.0-Map20
19071353	Cluster_355	SL3.0ch00	nc_RNA	19070986	19071353	-	24			Gypsy	ms519339_SL3.0ch00_RYX-incomp-chim_SL3_120k-B-P139.0-Map19
19085344	Cluster_356	SL3.0ch00	nc_RNA	19085265	19085344	*	24	Solyc00g247300
19090096	Cluster_357	SL3.0ch00	nc_RNA	19089150	19090096	*	22
19136758	Cluster_358	SL3.0ch00	nc_RNA	19136624	19136758	*	23
19182625	Cluster_359	SL3.0ch00	nc_RNA	19181736	19182625	*	24
19205654	Cluster_360	SL3.0ch00	nc_RNA	19205247	19205654	*	N
19207162	Cluster_361	SL3.0ch00	nc_RNA	19205754	19207162	*	24
19232502	Cluster_362	SL3.0ch00	nc_RNA	19231262	19232502	*	24
19251058	Cluster_363	SL3.0ch00	nc_RNA	19250776	19251058	*	24			Gypsy	ms519342_SL3.0ch00_RYX-incomp-chim_SL3_120k-B-P147.0-Map20
19370589	Cluster_364	SL3.0ch00	nc_RNA	19370478	19370589	*	24
19370999	Cluster_365	SL3.0ch00	nc_RNA	19370793	19370999	*	24
19382675	Cluster_366	SL3.0ch00	nc_RNA	19382574	19382675	+	N
19383015	Cluster_367	SL3.0ch00	nc_RNA	19382835	19383015	*	N
19490433	Cluster_368	SL3.0ch00	nc_RNA	19490025	19490433	*	24
19499358	Cluster_369	SL3.0ch00	nc_RNA	19499026	19499358	*	22			Unclassified	ms94281_SL3.0ch00_noCat_SL3_120k-B-R542-Map5
19517550	Cluster_370	SL3.0ch00	nc_RNA	19517096	19517550	*	N
19518202	Cluster_371	SL3.0ch00	nc_RNA	19517705	19518202	*	24		PROM_Solyc00g265510	Gypsy	ms618712_SL3.0ch00_RYX-incomp-chim_SL3_120k-B-R1684-Map20
19575670	Cluster_372	SL3.0ch00	nc_RNA	19575437	19575670	*	N			Gypsy	ms618712_SL3.0ch00_RYX-incomp-chim_SL3_120k-B-R1684-Map20
19576060	Cluster_373	SL3.0ch00	nc_RNA	19575886	19576060	+	N			Gypsy	ms618712_SL3.0ch00_RYX-incomp-chim_SL3_120k-B-R1684-Map20
19577636	Cluster_374	SL3.0ch00	nc_RNA	19576199	19577636	+	N			Gypsy	ms618712_SL3.0ch00_RYX-incomp-chim_SL3_120k-B-R1684-Map20
19582131	Cluster_375	SL3.0ch00	nc_RNA	19581792	19582131	*	24
19585744	Cluster_376	SL3.0ch00	nc_RNA	19584754	19585744	+	24		PROM_Solyc00g268310
19643519	Cluster_377	SL3.0ch00	nc_RNA	19642970	19643519	*	24				ms618712_SL3.0ch00_RYX-incomp-chim_SL3_120k-B-R1684-Map20-exon1
19646281	Cluster_378	SL3.0ch00	nc_RNA	19645692	19646281	-	24
19658870	Cluster_379	SL3.0ch00	nc_RNA	19658243	19658870	*	22				ms618712_SL3.0ch00_RYX-incomp-chim_SL3_120k-B-R1684-Map20-exon2
19687529	Cluster_380	SL3.0ch00	nc_RNA	19687289	19687529	*	24
19771976	Cluster_381	SL3.0ch00	nc_RNA	19771832	19771976	-	N
19795916	Cluster_382	SL3.0ch00	nc_RNA	19795603	19795916	-	N	Solyc00g277510
19832486	Cluster_383	SL3.0ch00	nc_RNA	19832209	19832486	+	24
19835554	Cluster_384	SL3.0ch00	nc_RNA	19835417	19835554	*	22
19915408	Cluster_385	SL3.0ch00	nc_RNA	19915361	19915408	-	24				ms618712_SL3.0ch00_RYX-incomp-chim_SL3_120k-B-R1684-Map20-exon3
19980107	Cluster_386	SL3.0ch00	nc_RNA	19979885	19980107	+	24			Copia	ms299788_SL3.0ch00_RYX-incomp-chim_SL3_120k-B-G198-Map20_reversed
20012607	Cluster_387	SL3.0ch00	nc_RNA	20012129	20012607	+	24			Unclassified	ms291433_SL3.0ch00_noCat_SL3_120k-B-R3537-Map5
20022002	Cluster_388	SL3.0ch00	nc_RNA	20021559	20022002	*	24
20022594	Cluster_389	SL3.0ch00	nc_RNA	20022219	20022594	*	24
20235590	Cluster_390	SL3.0ch00	nc_RNA	20235500	20235590	-	22			Copia	ms619411_SL3.0ch00_RLX-comp_SL3_120k-B-G2035-Map20
20334214	Cluster_391	SL3.0ch00	nc_RNA	20334012	20334214	*	24			Gypsy	ms619707_SL3.0ch00_RLX-incomp_SL3_120k-B-R2330-Map5
20387144	Cluster_392	SL3.0ch00	nc_RNA	20386781	20387144	-	24		PROM_Solyc00g304030
20486620	Cluster_393	SL3.0ch00	nc_RNA	20486442	20486620	+	22			Gypsy	ms619734_SL3.0ch00_RYX-incomp-chim_SL3_120k-B-R1684-Map20
20532573	Cluster_394	SL3.0ch00	nc_RNA	20532406	20532573	-	24			Confused_TE	ms391206_SL3.0ch00_RIX-incomp-chim_SL3_120k-B-R55-Map7
20581400	Cluster_395	SL3.0ch00	nc_RNA	20580805	20581400	*	N
20594574	Cluster_396	SL3.0ch00	nc_RNA	20594103	20594574	+	24			Copia	ms162908_SL3.0ch00_RLX-incomp_SL3_120k-B-G1957-Map10_reversed
20594574	Cluster_396	SL3.0ch00	nc_RNA	20594103	20594574	+	24			Gypsy	ms97996_SL3.0ch00_RLX-comp_SL3_120k-B-G2073-Map8_reversed
20601029	Cluster_397	SL3.0ch00	nc_RNA	20600821	20601029	+	24
20601766	Cluster_398	SL3.0ch00	nc_RNA	20601580	20601766	*	24
20602063	Cluster_399	SL3.0ch00	nc_RNA	20601888	20602063	+	24
20639005	Cluster_400	SL3.0ch00	nc_RNA	20638604	20639005	+	22
20640628	Cluster_401	SL3.0ch00	nc_RNA	20640021	20640628	+	24
20656920	Cluster_402	SL3.0ch00	nc_RNA	20656573	20656920	*	21
20738151	Cluster_403	SL3.0ch00	nc_RNA	20738003	20738151	+	24		PROM_Solyc00g320430	Gypsy	ms98259_SL3.0ch00_RYX-incomp-chim_SL3_120k-B-R1684-Map20
20738151	Cluster_403	SL3.0ch00	nc_RNA	20738003	20738151	+	24		PROM_Solyc00g320430		ms162908_SL3.0ch00_RLX-incomp_SL3_120k-B-G1957-Map10_reversed-exon2
20739766	Cluster_404	SL3.0ch00	nc_RNA	20738588	20739766	-	N
20740557	Cluster_405	SL3.0ch00	nc_RNA	20740009	20740557	+	N
20814917	Cluster_406	SL3.0ch00	nc_RNA	20814669	20814917	*	23			Gypsy	ms98259_SL3.0ch00_RYX-incomp-chim_SL3_120k-B-R1684-Map20
30408	Cluster_407	SL3.0ch01	nc_RNA	30004	30408	*	24
54732	Cluster_408	SL3.0ch01	nc_RNA	54378	54732	*	24	Solyc01g005030	PROM_Solyc01g005040
65255	Cluster_409	SL3.0ch01	nc_RNA	65179	65255	-	24		PROM_Solyc01g005070	Confused_TE	ms131531_SL3.0ch01_RIX-incomp-chim_SL3_120k-B-R187-Map11_reversed
76208	Cluster_410	SL3.0ch01	nc_RNA	75950	76208	*	24			Confused_TE	ms132554_SL3.0ch01_RLX-incomp_SL3_120k-B-R1328-Map9
76208	Cluster_410	SL3.0ch01	nc_RNA	75950	76208	*	24			Gypsy	ms525834_SL3.0ch01_RLX-incomp_SL3_120k-B-R2000-Map8
82338	Cluster_411	SL3.0ch01	nc_RNA	81523	82338	*	24
90440	Cluster_412	SL3.0ch01	nc_RNA	90151	90440	+	N		PROM_Solyc01g005090	Copia	ms525859_SL3.0ch01_RLX-incomp_SL3_120k-B-R448-Map20
91892	Cluster_413	SL3.0ch01	nc_RNA	91521	91892	+	21
105305	Cluster_414	SL3.0ch01	nc_RNA	105057	105305	*	24	Solyc01g005120
106110	Cluster_415	SL3.0ch01	nc_RNA	105779	106110	-	24	Solyc01g005120
139681	Cluster_416	SL3.0ch01	nc_RNA	139595	139681	*	23		PROM_Solyc01g005170
141223	Cluster_417	SL3.0ch01	nc_RNA	141079	141223	+	24		PROM_Solyc01g005170
167869	Cluster_418	SL3.0ch01	nc_RNA	165627	167869	+	N	Solyc01g005210
175519	Cluster_419	SL3.0ch01	nc_RNA	174805	175519	+	N	Solyc01g005220
181067	Cluster_420	SL3.0ch01	nc_RNA	180785	181067	*	24		PROM_Solyc01g005230
195033	Cluster_421	SL3.0ch01	nc_RNA	194432	195033	-	N	Solyc01g005250	PROM_Solyc01g005260
204310	Cluster_422	SL3.0ch01	nc_RNA	203939	204310	*	24		PROM_Solyc01g005270	HostGene	ms525930_SL3.0ch01_SSR_SL3_120k-B-R1705-Map8
210672	Cluster_423	SL3.0ch01	nc_RNA	210471	210672	-	24		PROM_Solyc01g005290
220368	Cluster_424	SL3.0ch01	nc_RNA	218491	220368	+	N	Solyc01g005300
224871	Cluster_425	SL3.0ch01	nc_RNA	224577	224871	*	24	Solyc01g005310
225393	Cluster_426	SL3.0ch01	nc_RNA	224967	225393	*	24	Solyc01g005310
225839	Cluster_427	SL3.0ch01	nc_RNA	225557	225839	-	23	Solyc01g005310
227228	Cluster_428	SL3.0ch01	nc_RNA	226991	227228	*	24	Solyc01g005320	PROM_Solyc01g005310
237549	Cluster_429	SL3.0ch01	nc_RNA	237232	237549	-	24		PROM_Solyc01g005330
239181	Cluster_430	SL3.0ch01	nc_RNA	238932	239181	+	24
242394	Cluster_431	SL3.0ch01	nc_RNA	241037	242394	-	N	Solyc01g005340
248193	Cluster_432	SL3.0ch01	nc_RNA	247758	248193	*	24
258423	Cluster_433	SL3.0ch01	nc_RNA	258039	258423	*	24	Solyc01g005360	PROM_Solyc01g005370
272906	Cluster_434	SL3.0ch01	nc_RNA	271394	272906	*	24			EPRV	ms132762_SL3.0ch01_RLX-incomp_SL3_120k-B-G1815-Map7
275967	Cluster_435	SL3.0ch01	nc_RNA	275719	275967	*	24		PROM_Solyc01g005390	Gypsy	ms132855_SL3.0ch01_RLX-incomp_SL3_120k-B-R3388-Map9
278462	Cluster_436	SL3.0ch01	nc_RNA	278141	278462	*	24		PROM_Solyc01g005400
284397	Cluster_437	SL3.0ch01	nc_RNA	284208	284397	-	23
284699	Cluster_438	SL3.0ch01	nc_RNA	284481	284699	-	24			PutativeNoutoClassII	ms113541_SL3.0ch01_DTX-incomp_SL3_120k-B-R445-Map20
293364	Cluster_439	SL3.0ch01	nc_RNA	292638	293364	*	24			Unclassified	ms133087_SL3.0ch01_noCat_SL3_120k-B-P71.46-Map20
296202	Cluster_440	SL3.0ch01	nc_RNA	296109	296202	*	24		PROM_Solyc01g005420
307008	Cluster_441	SL3.0ch01	nc_RNA	306623	307008	*	24
318455	Cluster_442	SL3.0ch01	nc_RNA	318202	318455	*	24	Solyc01g005460	PROM_Solyc01g005450
318987	Cluster_443	SL3.0ch01	nc_RNA	318799	318987	-	24	Solyc01g005460	PROM_Solyc01g005450
340917	Cluster_444	SL3.0ch01	nc_RNA	340190	340917	*	N
349761	Cluster_445	SL3.0ch01	nc_RNA	349353	349761	+	24		PROM_Solyc01g005510
349761	Cluster_445	SL3.0ch01	nc_RNA	349353	349761	+	24		PROM_Solyc01g005520
357156	Cluster_446	SL3.0ch01	nc_RNA	356743	357156	*	23		PROM_Solyc01g005530
357857	Cluster_447	SL3.0ch01	nc_RNA	357724	357857	*	24		PROM_Solyc01g005530
358565	Cluster_448	SL3.0ch01	nc_RNA	358346	358565	*	24
359558	Cluster_449	SL3.0ch01	nc_RNA	359259	359558	*	24
370776	Cluster_450	SL3.0ch01	nc_RNA	370568	370776	-	24		PROM_Solyc01g005540	Unclassified	ms133124_SL3.0ch01_noCat_SL3_120k-B-R25-Map20
374177	Cluster_451	SL3.0ch01	nc_RNA	373786	374177	*	24
392041	Cluster_452	SL3.0ch01	nc_RNA	391812	392041	-	N
399261	Cluster_453	SL3.0ch01	nc_RNA	398939	399261	+	N	Solyc01g005560
399626	Cluster_454	SL3.0ch01	nc_RNA	399409	399626	+	24
427108	Cluster_455	SL3.0ch01	nc_RNA	426859	427108	*	24		PROM_Solyc01g005600
427108	Cluster_455	SL3.0ch01	nc_RNA	426859	427108	*	24		PROM_Solyc01g005610
429057	Cluster_456	SL3.0ch01	nc_RNA	428715	429057	*	24	Solyc01g005610
430053	Cluster_457	SL3.0ch01	nc_RNA	429591	430053	*	24	Solyc01g005610
431034	Cluster_458	SL3.0ch01	nc_RNA	430574	431034	-	N	Solyc01g005620
432439	Cluster_459	SL3.0ch01	nc_RNA	432073	432439	-	N	Solyc01g005620
435062	Cluster_460	SL3.0ch01	nc_RNA	434828	435062	-	N	Solyc01g005620
435834	Cluster_461	SL3.0ch01	nc_RNA	435274	435834	*	24		PROM_Solyc01g005620
441636	Cluster_462	SL3.0ch01	nc_RNA	440908	441636	-	N
444775	Cluster_463	SL3.0ch01	nc_RNA	444296	444775	*	24		PROM_Solyc01g005630
461747	Cluster_464	SL3.0ch01	nc_RNA	460864	461747	*	24
472285	Cluster_465	SL3.0ch01	nc_RNA	471963	472285	*	24		PROM_Solyc01g005680	EPRV	ms133400_SL3.0ch01_RLX-incomp_SL3_120k-B-G94-Map20_reversed
480024	Cluster_466	SL3.0ch01	nc_RNA	477975	480024	-	N
485768	Cluster_467	SL3.0ch01	nc_RNA	485655	485768	*	24		PROM_Solyc01g005710
485768	Cluster_467	SL3.0ch01	nc_RNA	485655	485768	*	24		PROM_Solyc01g005700
485768	Cluster_467	SL3.0ch01	nc_RNA	485655	485768	*	24		PROM_Solyc01g005720
490265	Cluster_468	SL3.0ch01	nc_RNA	490046	490265	*	24	Solyc01g005705	PROM_Solyc01g005730
493745	Cluster_469	SL3.0ch01	nc_RNA	491711	493745	+	N	Solyc01g005730
495859	Cluster_470	SL3.0ch01	nc_RNA	495509	495859	*	24		PROM_Solyc01g005755
495859	Cluster_470	SL3.0ch01	nc_RNA	495509	495859	*	24		PROM_Solyc01g005760
495859	Cluster_470	SL3.0ch01	nc_RNA	495509	495859	*	24		PROM_Solyc01g005740
498898	Cluster_471	SL3.0ch01	nc_RNA	496519	498898	+	N	Solyc01g005760
498898	Cluster_471	SL3.0ch01	nc_RNA	496519	498898	+	N	Solyc01g005755
537145	Cluster_472	SL3.0ch01	nc_RNA	537063	537145	+	N	Solyc01g005820
537757	Cluster_473	SL3.0ch01	nc_RNA	537251	537757	+	N	Solyc01g005820
537979	Cluster_474	SL3.0ch01	nc_RNA	537898	537979	+	N	Solyc01g005820
538362	Cluster_475	SL3.0ch01	nc_RNA	538236	538362	+	N	Solyc01g005820
576538	Cluster_476	SL3.0ch01	nc_RNA	575857	576538	*	24
579902	Cluster_477	SL3.0ch01	nc_RNA	579270	579902	*	24	Solyc01g005860
588750	Cluster_478	SL3.0ch01	nc_RNA	588118	588750	*	24	Solyc01g005890
607428	Cluster_479	SL3.0ch01	nc_RNA	606570	607428	*	24	Solyc01g005930
609032	Cluster_480	SL3.0ch01	nc_RNA	608474	609032	+	N	Solyc01g005930
610304	Cluster_481	SL3.0ch01	nc_RNA	609955	610304	-	N
610900	Cluster_482	SL3.0ch01	nc_RNA	610388	610900	*	24
611921	Cluster_483	SL3.0ch01	nc_RNA	611782	611921	-	24
615436	Cluster_484	SL3.0ch01	nc_RNA	613802	615436	*	24
616050	Cluster_485	SL3.0ch01	nc_RNA	615918	616050	*	24	Solyc01g005940
648436	Cluster_486	SL3.0ch01	nc_RNA	648138	648436	*	24
649522	Cluster_487	SL3.0ch01	nc_RNA	649208	649522	-	24
653031	Cluster_488	SL3.0ch01	nc_RNA	652808	653031	-	24		PROM_Solyc01g005980
658753	Cluster_489	SL3.0ch01	nc_RNA	658446	658753	*	24			Gypsy	ms133434_SL3.0ch01_RLX-incomp-chim_SL3_120k-B-R223-Map6_reversed
661750	Cluster_490	SL3.0ch01	nc_RNA	661160	661750	*	24		PROM_Solyc01g006000
670518	Cluster_491	SL3.0ch01	nc_RNA	669883	670518	*	24		PROM_Solyc01g006010
722984	Cluster_492	SL3.0ch01	nc_RNA	722656	722984	+	24	Solyc01g006040
726668	Cluster_493	SL3.0ch01	nc_RNA	726617	726668	*	24	Solyc01g006040
738216	Cluster_494	SL3.0ch01	nc_RNA	737813	738216	*	24
743117	Cluster_495	SL3.0ch01	nc_RNA	742834	743117	*	24
744927	Cluster_496	SL3.0ch01	nc_RNA	744628	744927	*	24			Unclassified	ms264891_SL3.0ch01_noCat_SL3_120k-B-G308-Map20
750103	Cluster_497	SL3.0ch01	nc_RNA	749822	750103	*	24
759228	Cluster_498	SL3.0ch01	nc_RNA	759160	759228	*	22	Solyc01g006100
773076	Cluster_499	SL3.0ch01	nc_RNA	772871	773076	+	24		PROM_Solyc01g006110
773943	Cluster_500	SL3.0ch01	nc_RNA	773239	773943	*	24		PROM_Solyc01g006110
797492	Cluster_501	SL3.0ch01	nc_RNA	796590	797492	-	24
804479	Cluster_502	SL3.0ch01	nc_RNA	804237	804479	*	24			TIR_MITEov10	ms264897_SL3.0ch01_DTX-incomp-chim_SL3_120k-B-P345.259-Map12
805891	Cluster_503	SL3.0ch01	nc_RNA	805672	805891	-	N
806881	Cluster_504	SL3.0ch01	nc_RNA	806649	806881	-	N	Solyc01g006160
812204	Cluster_505	SL3.0ch01	nc_RNA	811760	812204	*	24		PROM_Solyc01g006170
818347	Cluster_506	SL3.0ch01	nc_RNA	817670	818347	*	24	Solyc01g006180
831220	Cluster_507	SL3.0ch01	nc_RNA	830859	831220	+	24	Solyc01g006200
832310	Cluster_508	SL3.0ch01	nc_RNA	831664	832310	*	22	Solyc01g006200
852633	Cluster_509	SL3.0ch01	nc_RNA	852004	852633	*	24		PROM_Solyc01g006230
852633	Cluster_509	SL3.0ch01	nc_RNA	852004	852633	*	24		PROM_Solyc01g006220
860714	Cluster_510	SL3.0ch01	nc_RNA	860369	860714	*	24	Solyc01g006240
866402	Cluster_511	SL3.0ch01	nc_RNA	865649	866402	*	24
868067	Cluster_512	SL3.0ch01	nc_RNA	867906	868067	+	24	Solyc01g006260
869886	Cluster_513	SL3.0ch01	nc_RNA	869589	869886	*	24
870952	Cluster_514	SL3.0ch01	nc_RNA	870792	870952	-	24			TIR_MITEov10	ms264898_SL3.0ch01_DTX-incomp-chim_SL3_120k-B-P345.259-Map12
877731	Cluster_515	SL3.0ch01	nc_RNA	876561	877731	+	N	Solyc01g006280
880550	Cluster_516	SL3.0ch01	nc_RNA	879814	880550	+	N	Solyc01g006280
892281	Cluster_517	SL3.0ch01	nc_RNA	891765	892281	*	24		PROM_Solyc01g006300
910235	Cluster_518	SL3.0ch01	nc_RNA	909625	910235	*	24	Solyc01g006330
934650	Cluster_519	SL3.0ch01	nc_RNA	934072	934650	*	N	Solyc01g006350
1025047	Cluster_520	SL3.0ch01	nc_RNA	1024652	1025047	*	24	Solyc01g006410
1029665	Cluster_521	SL3.0ch01	nc_RNA	1029129	1029665	+	24		PROM_Solyc01g006420
1032639	Cluster_522	SL3.0ch01	nc_RNA	1032476	1032639	*	24
1032939	Cluster_523	SL3.0ch01	nc_RNA	1032731	1032939	*	24
1034719	Cluster_524	SL3.0ch01	nc_RNA	1033112	1034719	-	N
1072732	Cluster_525	SL3.0ch01	nc_RNA	1072455	1072732	*	24	Solyc01g006470	PROM_Solyc01g006480	Unclassified	ms527238_SL3.0ch01_noCat_SL3_120k-B-R855-Map5
1087728	Cluster_526	SL3.0ch01	nc_RNA	1086996	1087728	*	24		PROM_Solyc01g006490
1099868	Cluster_527	SL3.0ch01	nc_RNA	1099742	1099868	+	24	Solyc01g006520
1102763	Cluster_528	SL3.0ch01	nc_RNA	1102327	1102763	*	24		PROM_Solyc01g006530
1104173	Cluster_529	SL3.0ch01	nc_RNA	1103830	1104173	*	23		PROM_Solyc01g006530
1117348	Cluster_530	SL3.0ch01	nc_RNA	1116862	1117348	+	N	Solyc01g006540
1120859	Cluster_531	SL3.0ch01	nc_RNA	1119868	1120859	*	24	Solyc01g006540
1123357	Cluster_532	SL3.0ch01	nc_RNA	1122915	1123357	+	N	Solyc01g006540
1136873	Cluster_533	SL3.0ch01	nc_RNA	1136654	1136873	*	24	Solyc01g006565
1138160	Cluster_534	SL3.0ch01	nc_RNA	1137860	1138160	*	24	Solyc01g006565
1139563	Cluster_535	SL3.0ch01	nc_RNA	1139271	1139563	*	24		PROM_Solyc01g006565	Copia_withPotentialHostGeneDomain	ms134901_SL3.0ch01_RLX-incomp_SL3_120k-B-R210-Map6
1196864	Cluster_536	SL3.0ch01	nc_RNA	1196033	1196864	*	24			EPRV	ms135165_SL3.0ch01_RLX-incomp_SL3_120k-B-G1815-Map7
1199523	Cluster_537	SL3.0ch01	nc_RNA	1199265	1199523	-	24	Solyc01g006590
1209284	Cluster_538	SL3.0ch01	nc_RNA	1208824	1209284	*	24		PROM_Solyc01g006600	EPRV	ms135167_SL3.0ch01_RLX-incomp_SL3_120k-B-G2038-Map13_reversed
1210433	Cluster_539	SL3.0ch01	nc_RNA	1210133	1210433	*	24	Solyc01g006610		EPRV	ms135168_SL3.0ch01_RLX-incomp_SL3_120k-B-G2038-Map13_reversed
1211808	Cluster_540	SL3.0ch01	nc_RNA	1211454	1211808	*	24	Solyc01g006610
1219676	Cluster_541	SL3.0ch01	nc_RNA	1219565	1219676	-	24		PROM_Solyc01g006620
1222301	Cluster_542	SL3.0ch01	nc_RNA	1222096	1222301	*	24
1244574	Cluster_543	SL3.0ch01	nc_RNA	1244157	1244574	-	24		PROM_Solyc01g006650
1254925	Cluster_544	SL3.0ch01	nc_RNA	1254461	1254925	*	24	Solyc01g006660
1256274	Cluster_545	SL3.0ch01	nc_RNA	1255842	1256274	+	24		PROM_Solyc01g006660
1266835	Cluster_546	SL3.0ch01	nc_RNA	1266595	1266835	*	24
1271966	Cluster_547	SL3.0ch01	nc_RNA	1271493	1271966	*	24		PROM_Solyc01g006690
1300541	Cluster_548	SL3.0ch01	nc_RNA	1300058	1300541	-	24
1301323	Cluster_549	SL3.0ch01	nc_RNA	1300779	1301323	*	24
1305406	Cluster_550	SL3.0ch01	nc_RNA	1304817	1305406	*	24	Solyc01g006720
1313574	Cluster_551	SL3.0ch01	nc_RNA	1313524	1313574	-	23			EPRV	ms135168_SL3.0ch01_RLX-incomp_SL3_120k-B-G2038-Map13_reversed
1332243	Cluster_552	SL3.0ch01	nc_RNA	1332088	1332243	*	24		PROM_Solyc01g006730
1333637	Cluster_553	SL3.0ch01	nc_RNA	1333044	1333637	-	N		PROM_Solyc01g006735
1333637	Cluster_553	SL3.0ch01	nc_RNA	1333044	1333637	-	N		PROM_Solyc01g006730
1345901	Cluster_554	SL3.0ch01	nc_RNA	1345787	1345901	-	N		PROM_Solyc01g006755
1346114	Cluster_555	SL3.0ch01	nc_RNA	1346051	1346114	-	N		PROM_Solyc01g006755
1362578	Cluster_556	SL3.0ch01	nc_RNA	1362309	1362578	+	24		PROM_Solyc01g006800
1370699	Cluster_557	SL3.0ch01	nc_RNA	1370174	1370699	+	N	Solyc01g006800
1379096	Cluster_558	SL3.0ch01	nc_RNA	1378819	1379096	*	24
1381741	Cluster_559	SL3.0ch01	nc_RNA	1381431	1381741	-	24
1389270	Cluster_560	SL3.0ch01	nc_RNA	1388692	1389270	*	24		PROM_Solyc01g006825
1391799	Cluster_561	SL3.0ch01	nc_RNA	1390247	1391799	+	N	Solyc01g006825
1398900	Cluster_562	SL3.0ch01	nc_RNA	1398371	1398900	*	24
1407757	Cluster_563	SL3.0ch01	nc_RNA	1407587	1407757	*	24
1410006	Cluster_564	SL3.0ch01	nc_RNA	1409293	1410006	-	24
1410625	Cluster_565	SL3.0ch01	nc_RNA	1410254	1410625	*	24	Solyc01g006840
1416929	Cluster_566	SL3.0ch01	nc_RNA	1416746	1416929	+	24		PROM_Solyc01g006850
1416929	Cluster_566	SL3.0ch01	nc_RNA	1416746	1416929	+	24		PROM_Solyc01g006840
1427736	Cluster_567	SL3.0ch01	nc_RNA	1426898	1427736	*	24	Solyc01g006860
1427736	Cluster_567	SL3.0ch01	nc_RNA	1426898	1427736	*	24	Solyc01g006870
1441412	Cluster_568	SL3.0ch01	nc_RNA	1440937	1441412	*	24		PROM_Solyc01g006880
1459587	Cluster_569	SL3.0ch01	nc_RNA	1458995	1459587	*	24
1472464	Cluster_570	SL3.0ch01	nc_RNA	1472070	1472464	-	N	Solyc01g006900
1478617	Cluster_571	SL3.0ch01	nc_RNA	1478263	1478617	-	24		PROM_Solyc01g006900
1480415	Cluster_572	SL3.0ch01	nc_RNA	1480058	1480415	*	24			EPRV	ms731_SL3.0ch01_RLX-incomp_SL3_120k-B-R274-Map12
1485389	Cluster_573	SL3.0ch01	nc_RNA	1485121	1485389	-	24		PROM_Solyc01g006910
1496118	Cluster_574	SL3.0ch01	nc_RNA	1495520	1496118	*	24
1511478	Cluster_575	SL3.0ch01	nc_RNA	1511084	1511478	*	24		PROM_Solyc01g006940
1514929	Cluster_576	SL3.0ch01	nc_RNA	1514706	1514929	*	24
1517200	Cluster_577	SL3.0ch01	nc_RNA	1516060	1517200	*	24	Solyc01g006950
1540676	Cluster_578	SL3.0ch01	nc_RNA	1539802	1540676	*	24		PROM_Solyc01g006970
1540676	Cluster_578	SL3.0ch01	nc_RNA	1539802	1540676	*	24		PROM_Solyc01g006960
1549195	Cluster_579	SL3.0ch01	nc_RNA	1549047	1549195	+	N	Solyc01g006970
1558891	Cluster_580	SL3.0ch01	nc_RNA	1558763	1558891	*	24	Solyc01g006993	PROM_Solyc01g006990
1560094	Cluster_581	SL3.0ch01	nc_RNA	1559806	1560094	+	24		PROM_Solyc01g006993
1584818	Cluster_582	SL3.0ch01	nc_RNA	1584415	1584818	*	24		PROM_Solyc01g007040
1585617	Cluster_583	SL3.0ch01	nc_RNA	1585355	1585617	*	24
1587302	Cluster_584	SL3.0ch01	nc_RNA	1586911	1587302	*	24
1594561	Cluster_585	SL3.0ch01	nc_RNA	1593394	1594561	*	24
1597079	Cluster_586	SL3.0ch01	nc_RNA	1596924	1597079	+	N	Solyc01g007060
1600552	Cluster_587	SL3.0ch01	nc_RNA	1600161	1600552	*	24
1602898	Cluster_588	SL3.0ch01	nc_RNA	1601315	1602898	-	N
1605152	Cluster_589	SL3.0ch01	nc_RNA	1604111	1605152	-	N	Solyc01g007070
1607063	Cluster_590	SL3.0ch01	nc_RNA	1605955	1607063	*	24		PROM_Solyc01g007070
1613975	Cluster_591	SL3.0ch01	nc_RNA	1613688	1613975	-	24
1622674	Cluster_592	SL3.0ch01	nc_RNA	1622226	1622674	-	24
1627102	Cluster_593	SL3.0ch01	nc_RNA	1626558	1627102	*	24
1643680	Cluster_594	SL3.0ch01	nc_RNA	1643379	1643680	-	24
1645510	Cluster_595	SL3.0ch01	nc_RNA	1645376	1645510	+	24
1649124	Cluster_596	SL3.0ch01	nc_RNA	1648836	1649124	*	24	Solyc01g007090		EPRV	ms731_SL3.0ch01_RLX-incomp_SL3_120k-B-R274-Map12
1656720	Cluster_597	SL3.0ch01	nc_RNA	1656254	1656720	*	24	Solyc01g007100
1660279	Cluster_598	SL3.0ch01	nc_RNA	1659123	1660279	*	N	Solyc01g007110
1662960	Cluster_599	SL3.0ch01	nc_RNA	1660355	1662960	*	N	Solyc01g007110
1682602	Cluster_600	SL3.0ch01	nc_RNA	1682314	1682602	*	N		PROM_Solyc01g007140
1713283	Cluster_601	SL3.0ch01	nc_RNA	1712792	1713283	-	N	Solyc01g007150
1734302	Cluster_602	SL3.0ch01	nc_RNA	1733724	1734302	*	24	Solyc01g007170
1745252	Cluster_603	SL3.0ch01	nc_RNA	1744944	1745252	*	24		PROM_Solyc01g007180
1746006	Cluster_604	SL3.0ch01	nc_RNA	1745357	1746006	*	N		PROM_Solyc01g007180
1747206	Cluster_605	SL3.0ch01	nc_RNA	1746995	1747206	-	N
1749791	Cluster_606	SL3.0ch01	nc_RNA	1749262	1749791	-	24
1757502	Cluster_607	SL3.0ch01	nc_RNA	1757097	1757502	*	N
1775862	Cluster_608	SL3.0ch01	nc_RNA	1775322	1775862	*	24	Solyc01g007200
1776608	Cluster_609	SL3.0ch01	nc_RNA	1776116	1776608	*	24	Solyc01g007200
1792818	Cluster_610	SL3.0ch01	nc_RNA	1792692	1792818	+	N
1800812	Cluster_611	SL3.0ch01	nc_RNA	1799608	1800812	+	N
1805619	Cluster_612	SL3.0ch01	nc_RNA	1805374	1805619	*	24		PROM_Solyc01g007230
1805619	Cluster_612	SL3.0ch01	nc_RNA	1805374	1805619	*	24		PROM_Solyc01g007230
1806503	Cluster_613	SL3.0ch01	nc_RNA	1806103	1806503	*	24		PROM_Solyc01g007240
1806503	Cluster_613	SL3.0ch01	nc_RNA	1806103	1806503	*	24		PROM_Solyc01g007240
1815582	Cluster_614	SL3.0ch01	nc_RNA	1814806	1815582	*	24				ms731_SL3.0ch01_RLX-incomp_SL3_120k-B-R274-Map12-exon1
1817324	Cluster_615	SL3.0ch01	nc_RNA	1817000	1817324	+	24
1817684	Cluster_616	SL3.0ch01	nc_RNA	1817525	1817684	*	24			Gypsy_withPotentialHostGeneDomain	ms528938_SL3.0ch01_RLX-incomp_SL3_120k-B-R3693-Map17_reversed
1817684	Cluster_616	SL3.0ch01	nc_RNA	1817525	1817684	*	24				ms731_SL3.0ch01_RLX-incomp_SL3_120k-B-R274-Map12-exon2
1861265	Cluster_617	SL3.0ch01	nc_RNA	1860994	1861265	*	24		PROM_Solyc01g007770
1862357	Cluster_618	SL3.0ch01	nc_RNA	1861916	1862357	*	24		PROM_Solyc01g007770
1866250	Cluster_619	SL3.0ch01	nc_RNA	1865825	1866250	*	24	Solyc01g007780
1866897	Cluster_620	SL3.0ch01	nc_RNA	1866579	1866897	+	24	Solyc01g007780
1873324	Cluster_621	SL3.0ch01	nc_RNA	1873065	1873324	*	24		PROM_Solyc01g007790
1874875	Cluster_622	SL3.0ch01	nc_RNA	1874212	1874875	*	24		PROM_Solyc01g007790
1886096	Cluster_623	SL3.0ch01	nc_RNA	1885728	1886096	*	24
1890664	Cluster_624	SL3.0ch01	nc_RNA	1890307	1890664	*	24		PROM_Solyc01g007800
1899121	Cluster_625	SL3.0ch01	nc_RNA	1898818	1899121	*	24			PutativeNoutoClassII	ms525078_SL3.0ch01_DXX_SL3_120k-B-R2407-Map6
1904482	Cluster_626	SL3.0ch01	nc_RNA	1904195	1904482	*	24
1928474	Cluster_627	SL3.0ch01	nc_RNA	1927955	1928474	*	24
1939635	Cluster_628	SL3.0ch01	nc_RNA	1939525	1939635	-	24		PROM_Solyc01g007830
1944710	Cluster_629	SL3.0ch01	nc_RNA	1944495	1944710	+	24		PROM_Solyc01g007840
1954172	Cluster_630	SL3.0ch01	nc_RNA	1953833	1954172	-	N	Solyc01g007855
1954172	Cluster_630	SL3.0ch01	nc_RNA	1953833	1954172	-	N	Solyc01g007860
1955586	Cluster_631	SL3.0ch01	nc_RNA	1955451	1955586	-	N	Solyc01g007860
1962958	Cluster_632	SL3.0ch01	nc_RNA	1962703	1962958	*	24
1973608	Cluster_633	SL3.0ch01	nc_RNA	1973352	1973608	+	24
1975602	Cluster_634	SL3.0ch01	nc_RNA	1975253	1975602	*	24
1977016	Cluster_635	SL3.0ch01	nc_RNA	1976354	1977016	*	24
2030822	Cluster_636	SL3.0ch01	nc_RNA	2030486	2030822	*	24			Copia	ms135962_SL3.0ch01_RLX-incomp_SL3_120k-B-R2801-Map7
2085089	Cluster_637	SL3.0ch01	nc_RNA	2084335	2085089	*	24	Solyc01g007960
2092913	Cluster_638	SL3.0ch01	nc_RNA	2092703	2092913	+	23
2096028	Cluster_639	SL3.0ch01	nc_RNA	2095508	2096028	*	23		PROM_Solyc01g007980
2109871	Cluster_640	SL3.0ch01	nc_RNA	2108899	2109871	*	24		PROM_Solyc01g008000
2111606	Cluster_641	SL3.0ch01	nc_RNA	2111416	2111606	+	N	Solyc01g008000
2112657	Cluster_642	SL3.0ch01	nc_RNA	2112340	2112657	+	N	Solyc01g008000
2112935	Cluster_643	SL3.0ch01	nc_RNA	2112795	2112935	+	N	Solyc01g008000
2114149	Cluster_644	SL3.0ch01	nc_RNA	2113971	2114149	+	N	Solyc01g008000
2114681	Cluster_645	SL3.0ch01	nc_RNA	2114386	2114681	+	N
2133503	Cluster_646	SL3.0ch01	nc_RNA	2133224	2133503	+	24		PROM_Solyc01g008050
2137164	Cluster_647	SL3.0ch01	nc_RNA	2136649	2137164	*	24		PROM_Solyc01g008060
2137998	Cluster_648	SL3.0ch01	nc_RNA	2137868	2137998	*	24		PROM_Solyc01g008060
2155763	Cluster_649	SL3.0ch01	nc_RNA	2155341	2155763	-	N	Solyc01g008080
2156630	Cluster_650	SL3.0ch01	nc_RNA	2156524	2156630	-	N	Solyc01g008090
2156630	Cluster_650	SL3.0ch01	nc_RNA	2156524	2156630	-	N	Solyc01g008080
2157664	Cluster_651	SL3.0ch01	nc_RNA	2157578	2157664	-	N	Solyc01g008090	PROM_Solyc01g008080
2158737	Cluster_652	SL3.0ch01	nc_RNA	2157900	2158737	*	24	Solyc01g008090	PROM_Solyc01g008080
2159892	Cluster_653	SL3.0ch01	nc_RNA	2159538	2159892	-	N	Solyc01g008090
2162734	Cluster_654	SL3.0ch01	nc_RNA	2162242	2162734	*	24	Solyc01g008090
2169023	Cluster_655	SL3.0ch01	nc_RNA	2168379	2169023	*	24
2171422	Cluster_656	SL3.0ch01	nc_RNA	2171149	2171422	*	24
2178572	Cluster_657	SL3.0ch01	nc_RNA	2177455	2178572	+	N	Solyc01g008110
2179338	Cluster_658	SL3.0ch01	nc_RNA	2178814	2179338	*	24		PROM_Solyc01g008115
2199688	Cluster_659	SL3.0ch01	nc_RNA	2199182	2199688	*	24		PROM_Solyc01g008120	Gypsy	ms136126_SL3.0ch01_RLX-incomp-chim_SL3_120k-B-R223-Map6_reversed
2203792	Cluster_660	SL3.0ch01	nc_RNA	2203699	2203792	-	24			Unclassified	ms530424_SL3.0ch01_noCat_SL3_120k-B-G308-Map20
2220568	Cluster_661	SL3.0ch01	nc_RNA	2220142	2220568	*	24
2221699	Cluster_662	SL3.0ch01	nc_RNA	2221367	2221699	*	24
2231282	Cluster_663	SL3.0ch01	nc_RNA	2230936	2231282	*	24			Confused_TE	ms530428_SL3.0ch01_RIX-incomp_SL3_120k-B-P242.323-Map6
2242713	Cluster_664	SL3.0ch01	nc_RNA	2242172	2242713	*	24		PROM_Solyc01g008170
2243040	Cluster_665	SL3.0ch01	nc_RNA	2242810	2243040	+	24		PROM_Solyc01g008170
2273849	Cluster_666	SL3.0ch01	nc_RNA	2273379	2273849	*	24
2288914	Cluster_667	SL3.0ch01	nc_RNA	2288662	2288914	*	24	Solyc01g008220
2289269	Cluster_668	SL3.0ch01	nc_RNA	2288998	2289269	*	24	Solyc01g008220
2290143	Cluster_669	SL3.0ch01	nc_RNA	2289535	2290143	*	23
2295208	Cluster_670	SL3.0ch01	nc_RNA	2293915	2295208	-	N
2308991	Cluster_671	SL3.0ch01	nc_RNA	2308777	2308991	*	24	Solyc01g008240		put_hAT	ms530430_SL3.0ch01_DTX-comp_SL3_120k-B-P509.143-Map7_reversed
2309420	Cluster_672	SL3.0ch01	nc_RNA	2309068	2309420	-	24	Solyc01g008240
2313112	Cluster_673	SL3.0ch01	nc_RNA	2312477	2313112	*	24		PROM_Solyc01g008240
2313112	Cluster_673	SL3.0ch01	nc_RNA	2312477	2313112	*	24		PROM_Solyc01g008240
2313237	Cluster_674	SL3.0ch01	nc_RNA	2313210	2313237	-	23		PROM_Solyc01g008250
2313237	Cluster_674	SL3.0ch01	nc_RNA	2313210	2313237	-	23		PROM_Solyc01g008250
2313237	Cluster_674	SL3.0ch01	nc_RNA	2313210	2313237	-	23		PROM_Solyc01g008260
2315064	Cluster_675	SL3.0ch01	nc_RNA	2314620	2315064	*	24		PROM_Solyc01g008260
2320091	Cluster_676	SL3.0ch01	nc_RNA	2319513	2320091	*	24		PROM_Solyc01g008270
2330458	Cluster_677	SL3.0ch01	nc_RNA	2330083	2330458	*	24		PROM_Solyc01g008290
2336367	Cluster_678	SL3.0ch01	nc_RNA	2336278	2336367	*	24	Solyc01g008290			ms530430_SL3.0ch01_DTX-comp_SL3_120k-B-P509.143-Map7_reversed-exon1
2340320	Cluster_679	SL3.0ch01	nc_RNA	2339796	2340320	*	24	Solyc01g008300
2342345	Cluster_680	SL3.0ch01	nc_RNA	2341968	2342345	*	24
2406891	Cluster_681	SL3.0ch01	nc_RNA	2406356	2406891	*	24		PROM_Solyc01g008350
2408712	Cluster_682	SL3.0ch01	nc_RNA	2408570	2408712	-	24		PROM_Solyc01g008360
2412500	Cluster_683	SL3.0ch01	nc_RNA	2412116	2412500	-	N	Solyc01g008370
2433641	Cluster_684	SL3.0ch01	nc_RNA	2433465	2433641	-	24
2453342	Cluster_685	SL3.0ch01	nc_RNA	2453038	2453342	*	24		PROM_Solyc01g008430	Unclassified	ms530431_SL3.0ch01_noCat_SL3_120k-B-P71.46-Map20
2476028	Cluster_686	SL3.0ch01	nc_RNA	2475722	2476028	*	24
2482741	Cluster_687	SL3.0ch01	nc_RNA	2482080	2482741	*	24		PROM_Solyc01g008460
2482741	Cluster_687	SL3.0ch01	nc_RNA	2482080	2482741	*	24		PROM_Solyc01g008470
2527613	Cluster_688	SL3.0ch01	nc_RNA	2527075	2527613	*	24			Unclassified	ms503523_SL3.0ch01_noCat_SL3_120k-B-G308-Map20
2539714	Cluster_689	SL3.0ch01	nc_RNA	2538888	2539714	*	24
2540615	Cluster_690	SL3.0ch01	nc_RNA	2540294	2540615	*	24
2542677	Cluster_691	SL3.0ch01	nc_RNA	2541606	2542677	*	24
2546280	Cluster_692	SL3.0ch01	nc_RNA	2545959	2546280	*	24	Solyc01g008500
2546280	Cluster_692	SL3.0ch01	nc_RNA	2545959	2546280	*	24	Solyc01g008497
2549416	Cluster_693	SL3.0ch01	nc_RNA	2548917	2549416	*	24		PROM_Solyc01g008497
2551284	Cluster_694	SL3.0ch01	nc_RNA	2550930	2551284	*	24		PROM_Solyc01g008510
2552678	Cluster_695	SL3.0ch01	nc_RNA	2552393	2552678	*	24		PROM_Solyc01g008510
2553818	Cluster_696	SL3.0ch01	nc_RNA	2552942	2553818	*	24
2554577	Cluster_697	SL3.0ch01	nc_RNA	2554177	2554577	+	24		PROM_Solyc01g008520
2565073	Cluster_698	SL3.0ch01	nc_RNA	2564637	2565073	*	24
2572977	Cluster_699	SL3.0ch01	nc_RNA	2572070	2572977	*	24		PROM_Solyc01g008530
2580920	Cluster_700	SL3.0ch01	nc_RNA	2580150	2580920	*	24
2585002	Cluster_701	SL3.0ch01	nc_RNA	2584659	2585002	*	24		PROM_Solyc01g008550
2609556	Cluster_702	SL3.0ch01	nc_RNA	2608993	2609556	*	24		PROM_Solyc01g008580
2609556	Cluster_702	SL3.0ch01	nc_RNA	2608993	2609556	*	24		PROM_Solyc01g008590
2611764	Cluster_703	SL3.0ch01	nc_RNA	2611334	2611764	*	24			Gypsy	ms138167_SL3.0ch01_RLX-incomp_SL3_120k-B-G1580-Map6_reversed
2615769	Cluster_704	SL3.0ch01	nc_RNA	2615179	2615769	*	24		PROM_Solyc01g008600
2617582	Cluster_705	SL3.0ch01	nc_RNA	2617321	2617582	*	24	Solyc01g008600		HostGene	ms138572_SL3.0ch01_PotentialHostGene_SL3_120k-B-R2129-Map7
2629625	Cluster_706	SL3.0ch01	nc_RNA	2629474	2629625	*	24	Solyc01g008610
2632828	Cluster_707	SL3.0ch01	nc_RNA	2632435	2632828	*	24		PROM_Solyc01g008610
2646303	Cluster_708	SL3.0ch01	nc_RNA	2645823	2646303	*	24
2651644	Cluster_709	SL3.0ch01	nc_RNA	2651265	2651644	*	24
2668215	Cluster_710	SL3.0ch01	nc_RNA	2667841	2668215	*	24		PROM_Solyc01g008670
2670729	Cluster_711	SL3.0ch01	nc_RNA	2670542	2670729	*	24
2671662	Cluster_712	SL3.0ch01	nc_RNA	2671437	2671662	+	24	Solyc01g008680
2671898	Cluster_713	SL3.0ch01	nc_RNA	2671763	2671898	-	24	Solyc01g008680
2673640	Cluster_714	SL3.0ch01	nc_RNA	2673116	2673640	*	23	Solyc01g008680
2674886	Cluster_715	SL3.0ch01	nc_RNA	2674586	2674886	+	24		PROM_Solyc01g008680
2677181	Cluster_716	SL3.0ch01	nc_RNA	2676736	2677181	*	24	Solyc01g008690
2686462	Cluster_717	SL3.0ch01	nc_RNA	2685876	2686462	*	24		PROM_Solyc01g008700
2690134	Cluster_718	SL3.0ch01	nc_RNA	2689372	2690134	+	N	Solyc01g008710
2691430	Cluster_719	SL3.0ch01	nc_RNA	2690857	2691430	+	N	Solyc01g008710
2692689	Cluster_720	SL3.0ch01	nc_RNA	2691691	2692689	+	N
2694851	Cluster_721	SL3.0ch01	nc_RNA	2694606	2694851	*	24	Solyc01g008720
2695809	Cluster_722	SL3.0ch01	nc_RNA	2695719	2695809	*	24	Solyc01g008720
2715965	Cluster_723	SL3.0ch01	nc_RNA	2715612	2715965	*	24	Solyc01g008740
2731358	Cluster_724	SL3.0ch01	nc_RNA	2730928	2731358	*	24	Solyc01g008770
2759871	Cluster_725	SL3.0ch01	nc_RNA	2759675	2759871	*	24		PROM_Solyc01g008790
2763387	Cluster_726	SL3.0ch01	nc_RNA	2762413	2763387	*	24	Solyc01g008790
2765018	Cluster_727	SL3.0ch01	nc_RNA	2764615	2765018	-	N	Solyc01g008790
2770044	Cluster_728	SL3.0ch01	nc_RNA	2769116	2770044	*	21	Solyc01g008800
2775292	Cluster_729	SL3.0ch01	nc_RNA	2774727	2775292	-	24		PROM_Solyc01g008810	Unclassified	ms139309_SL3.0ch01_noCat_SL3_120k-B-R3389-Map5
2775292	Cluster_729	SL3.0ch01	nc_RNA	2774727	2775292	-	24		PROM_Solyc01g008800	Unclassified	ms139309_SL3.0ch01_noCat_SL3_120k-B-R3389-Map5
2782179	Cluster_730	SL3.0ch01	nc_RNA	2782068	2782179	-	24	Solyc01g008820
2784915	Cluster_731	SL3.0ch01	nc_RNA	2784300	2784915	*	24
2785892	Cluster_732	SL3.0ch01	nc_RNA	2785366	2785892	-	24
2788200	Cluster_733	SL3.0ch01	nc_RNA	2787722	2788200	*	24		PROM_Solyc01g008830
2790743	Cluster_734	SL3.0ch01	nc_RNA	2790329	2790743	*	24	Solyc01g008830
2794501	Cluster_735	SL3.0ch01	nc_RNA	2793915	2794501	*	24	Solyc01g008830
2796977	Cluster_736	SL3.0ch01	nc_RNA	2796881	2796977	-	23	Solyc01g008830	PROM_Solyc01g008840
2814635	Cluster_737	SL3.0ch01	nc_RNA	2813141	2814635	*	N	Solyc01g008850
2816748	Cluster_738	SL3.0ch01	nc_RNA	2815240	2816748	+	N	Solyc01g008850
2829802	Cluster_739	SL3.0ch01	nc_RNA	2828965	2829802	*	N	Solyc01g008870
2830564	Cluster_740	SL3.0ch01	nc_RNA	2830137	2830564	+	24		PROM_Solyc01g008870
2831460	Cluster_741	SL3.0ch01	nc_RNA	2831144	2831460	+	24		PROM_Solyc01g008870	Copia	ms419048_SL3.0ch01_RLX-incomp_SL3_120k-B-R1957-Map11
2848454	Cluster_742	SL3.0ch01	nc_RNA	2847798	2848454	*	24	Solyc01g008890
2848779	Cluster_743	SL3.0ch01	nc_RNA	2848610	2848779	-	21	Solyc01g008890
2862876	Cluster_744	SL3.0ch01	nc_RNA	2862462	2862876	*	24			Gypsy	ms219977_SL3.0ch01_RYX-incomp-chim_SL3_120k-B-R1684-Map20
2874198	Cluster_745	SL3.0ch01	nc_RNA	2873452	2874198	*	23
2895061	Cluster_746	SL3.0ch01	nc_RNA	2894378	2895061	-	N
2899669	Cluster_747	SL3.0ch01	nc_RNA	2899308	2899669	*	24
2916387	Cluster_748	SL3.0ch01	nc_RNA	2916237	2916387	+	N	Solyc01g008960
2916716	Cluster_749	SL3.0ch01	nc_RNA	2916582	2916716	+	N	Solyc01g008960
2917983	Cluster_750	SL3.0ch01	nc_RNA	2917740	2917983	+	N	Solyc01g008960
2923016	Cluster_751	SL3.0ch01	nc_RNA	2922580	2923016	-	N	Solyc01g008970
2924307	Cluster_752	SL3.0ch01	nc_RNA	2923124	2924307	-	N	Solyc01g008970
2929843	Cluster_753	SL3.0ch01	nc_RNA	2927926	2929843	*	24
2933775	Cluster_754	SL3.0ch01	nc_RNA	2933283	2933775	*	24	Solyc01g008977
2935191	Cluster_755	SL3.0ch01	nc_RNA	2934768	2935191	*	24	Solyc01g008977		SSR	ms118776_SL3.0ch01_SSR_SL3_120k-B-G318-Map20_reversed
2956137	Cluster_756	SL3.0ch01	nc_RNA	2955257	2956137	*	24
2974422	Cluster_757	SL3.0ch01	nc_RNA	2973893	2974422	*	24
2974583	Cluster_758	SL3.0ch01	nc_RNA	2974499	2974583	+	23		PROM_Solyc01g009040
2975718	Cluster_759	SL3.0ch01	nc_RNA	2975374	2975718	*	24		PROM_Solyc01g009040
2985507	Cluster_760	SL3.0ch01	nc_RNA	2985254	2985507	-	N	Solyc01g009050
2986247	Cluster_761	SL3.0ch01	nc_RNA	2986112	2986247	-	N	Solyc01g009050
3001338	Cluster_762	SL3.0ch01	nc_RNA	3000332	3001338	*	24		PROM_Solyc01g009060
3024517	Cluster_763	SL3.0ch01	nc_RNA	3024269	3024517	*	24		PROM_Solyc01g009080
3036145	Cluster_764	SL3.0ch01	nc_RNA	3035393	3036145	-	N	Solyc01g009090
3045921	Cluster_765	SL3.0ch01	nc_RNA	3045627	3045921	*	24		PROM_Solyc01g009100
3051133	Cluster_766	SL3.0ch01	nc_RNA	3050918	3051133	+	24
3053116	Cluster_767	SL3.0ch01	nc_RNA	3052801	3053116	*	24			Copia_withPotentialHostGeneDomain	ms140604_SL3.0ch01_RLX-incomp_SL3_120k-B-R210-Map6
3054347	Cluster_768	SL3.0ch01	nc_RNA	3054025	3054347	+	24			Copia	ms140706_SL3.0ch01_RYX-incomp-chim_SL3_120k-B-G198-Map20_reversed
3055961	Cluster_769	SL3.0ch01	nc_RNA	3055785	3055961	*	24
3068502	Cluster_770	SL3.0ch01	nc_RNA	3067634	3068502	-	24	Solyc01g009120		TIR_MITEov10	ms534409_SL3.0ch01_DTX-incomp_SL3_120k-B-R3669-Map8
3068502	Cluster_770	SL3.0ch01	nc_RNA	3067634	3068502	-	24	Solyc01g009120		Unclassified	ms372993_SL3.0ch01_noCat_SL3_120k-B-R154-Map20
3069615	Cluster_771	SL3.0ch01	nc_RNA	3068581	3069615	-	24	Solyc01g009120
3074611	Cluster_772	SL3.0ch01	nc_RNA	3073838	3074611	*	24	Solyc01g009120
3106010	Cluster_773	SL3.0ch01	nc_RNA	3105366	3106010	*	24
3107290	Cluster_774	SL3.0ch01	nc_RNA	3106412	3107290	-	N	Solyc01g009160
3113374	Cluster_775	SL3.0ch01	nc_RNA	3113148	3113374	*	24
3114054	Cluster_776	SL3.0ch01	nc_RNA	3113458	3114054	+	24
3115000	Cluster_777	SL3.0ch01	nc_RNA	3114568	3115000	+	24
3116281	Cluster_778	SL3.0ch01	nc_RNA	3115984	3116281	+	N
3136442	Cluster_779	SL3.0ch01	nc_RNA	3135899	3136442	*	24
3138717	Cluster_780	SL3.0ch01	nc_RNA	3137267	3138717	-	N	Solyc01g009170
3139811	Cluster_781	SL3.0ch01	nc_RNA	3138809	3139811	-	N	Solyc01g009170
3143040	Cluster_782	SL3.0ch01	nc_RNA	3142813	3143040	-	24
3151270	Cluster_783	SL3.0ch01	nc_RNA	3151001	3151270	*	24			MuDR	ms534486_SL3.0ch01_DTX-incomp_SL3_120k-B-G1991-Map5
3160468	Cluster_784	SL3.0ch01	nc_RNA	3160086	3160468	*	24
3161652	Cluster_785	SL3.0ch01	nc_RNA	3161250	3161652	+	24		PROM_Solyc01g009180
3170501	Cluster_786	SL3.0ch01	nc_RNA	3170099	3170501	-	24		PROM_Solyc01g009190
3200174	Cluster_787	SL3.0ch01	nc_RNA	3198999	3200174	*	24
3204112	Cluster_788	SL3.0ch01	nc_RNA	3203430	3204112	*	24	Solyc01g009240
3207841	Cluster_789	SL3.0ch01	nc_RNA	3207691	3207841	*	23
3208109	Cluster_790	SL3.0ch01	nc_RNA	3208031	3208109	+	N
3209039	Cluster_791	SL3.0ch01	nc_RNA	3208826	3209039	*	24	Solyc01g009245
3214528	Cluster_792	SL3.0ch01	nc_RNA	3214373	3214528	-	N		PROM_Solyc01g009250
3229410	Cluster_793	SL3.0ch01	nc_RNA	3228828	3229410	*	24				ms534486_SL3.0ch01_DTX-incomp_SL3_120k-B-G1991-Map5-exon2
3256669	Cluster_794	SL3.0ch01	nc_RNA	3256237	3256669	*	24
3257570	Cluster_795	SL3.0ch01	nc_RNA	3257194	3257570	*	24
3283791	Cluster_796	SL3.0ch01	nc_RNA	3283644	3283791	*	24			Unclassified	ms307550_SL3.0ch01_noCat_SL3_120k-B-R3813-Map5
3416169	Cluster_797	SL3.0ch01	nc_RNA	3415843	3416169	*	24
3417076	Cluster_798	SL3.0ch01	nc_RNA	3416642	3417076	*	24
3431877	Cluster_799	SL3.0ch01	nc_RNA	3431486	3431877	+	24			SSR	ms460469_SL3.0ch01_SSR_SL3_120k-B-G318-Map20_reversed
3433025	Cluster_800	SL3.0ch01	nc_RNA	3432687	3433025	-	24
3434600	Cluster_801	SL3.0ch01	nc_RNA	3434324	3434600	*	24
3473337	Cluster_802	SL3.0ch01	nc_RNA	3472982	3473337	*	24	Solyc01g009340		HostGene	ms403831_SL3.0ch01_noCat_SL3_120k-B-R3049-Map6
3486645	Cluster_803	SL3.0ch01	nc_RNA	3485119	3486645	*	24
3492833	Cluster_804	SL3.0ch01	nc_RNA	3492598	3492833	*	24	Solyc01g009370
3497673	Cluster_805	SL3.0ch01	nc_RNA	3497509	3497673	*	24	Solyc01g009370
3500155	Cluster_806	SL3.0ch01	nc_RNA	3499818	3500155	*	24		PROM_Solyc01g009370
3502623	Cluster_807	SL3.0ch01	nc_RNA	3502401	3502623	*	24
3504831	Cluster_808	SL3.0ch01	nc_RNA	3504286	3504831	*	24		PROM_Solyc01g009380	Gypsy_withPotentialHostGeneDomain	ms141764_SL3.0ch01_RLX-incomp_SL3_120k-B-R3693-Map17_reversed
3515212	Cluster_809	SL3.0ch01	nc_RNA	3513964	3515212	+	24	Solyc01g009380
3516225	Cluster_810	SL3.0ch01	nc_RNA	3515435	3516225	+	24	Solyc01g009380
3517005	Cluster_811	SL3.0ch01	nc_RNA	3516554	3517005	+	24	Solyc01g009380
3528690	Cluster_812	SL3.0ch01	nc_RNA	3528457	3528690	*	24
3537039	Cluster_813	SL3.0ch01	nc_RNA	3536352	3537039	*	22		PROM_Solyc01g009390	TRIM_LARD	ms141942_SL3.0ch01_DTX-incomp-chim_SL3_120k-B-R3849-Map6
3539172	Cluster_814	SL3.0ch01	nc_RNA	3538805	3539172	*	N		PROM_Solyc01g009400
3551297	Cluster_815	SL3.0ch01	nc_RNA	3550931	3551297	*	24	Solyc01g009430
3553898	Cluster_816	SL3.0ch01	nc_RNA	3553553	3553898	*	24	Solyc01g009430		Gypsy	ms142343_SL3.0ch01_RLX-incomp_SL3_120k-B-R6751-Map5
3554319	Cluster_817	SL3.0ch01	nc_RNA	3554074	3554319	*	24	Solyc01g009430	PROM_Solyc01g009420
3556190	Cluster_818	SL3.0ch01	nc_RNA	3555669	3556190	+	N	Solyc01g009430
3556190	Cluster_818	SL3.0ch01	nc_RNA	3555669	3556190	+	N	Solyc01g009430
3560501	Cluster_819	SL3.0ch01	nc_RNA	3559879	3560501	+	N	Solyc01g009430
3560501	Cluster_819	SL3.0ch01	nc_RNA	3559879	3560501	+	N	Solyc01g009430
3562430	Cluster_820	SL3.0ch01	nc_RNA	3562288	3562430	*	24	Solyc01g009430		Copia	ms142372_SL3.0ch01_RLX-incomp_SL3_120k-B-G1848-Map20
3563295	Cluster_821	SL3.0ch01	nc_RNA	3562738	3563295	-	N	Solyc01g009430
3564796	Cluster_822	SL3.0ch01	nc_RNA	3564423	3564796	*	24	Solyc01g009430
3568069	Cluster_823	SL3.0ch01	nc_RNA	3567709	3568069	*	24	Solyc01g009430
3569003	Cluster_824	SL3.0ch01	nc_RNA	3568375	3569003	-	N	Solyc01g009420
3570143	Cluster_825	SL3.0ch01	nc_RNA	3569525	3570143	-	N	Solyc01g009420
3576799	Cluster_826	SL3.0ch01	nc_RNA	3576621	3576799	+	24
3608063	Cluster_827	SL3.0ch01	nc_RNA	3607858	3608063	*	24
3609607	Cluster_828	SL3.0ch01	nc_RNA	3609414	3609607	-	24			Copia	ms142772_SL3.0ch01_RYX-incomp-chim_SL3_120k-B-G198-Map20_reversed
3617087	Cluster_829	SL3.0ch01	nc_RNA	3616288	3617087	*	24		PROM_Solyc01g009450
3617874	Cluster_830	SL3.0ch01	nc_RNA	3617354	3617874	*	24
3623402	Cluster_831	SL3.0ch01	nc_RNA	3623078	3623402	*	24
3633295	Cluster_832	SL3.0ch01	nc_RNA	3632727	3633295	*	24	Solyc01g009470
3641629	Cluster_833	SL3.0ch01	nc_RNA	3641325	3641629	*	24		PROM_Solyc01g009480
3652946	Cluster_834	SL3.0ch01	nc_RNA	3651489	3652946	*	24
3683225	Cluster_835	SL3.0ch01	nc_RNA	3682913	3683225	+	23	Solyc01g009500			ms142772_SL3.0ch01_RYX-incomp-chim_SL3_120k-B-G198-Map20_reversed-exon2
3683472	Cluster_836	SL3.0ch01	nc_RNA	3683300	3683472	+	24	Solyc01g009500		Copia	ms274093_SL3.0ch01_RLX-incomp-chim_SL3_120k-B-R550-Map20_reversed
3683472	Cluster_836	SL3.0ch01	nc_RNA	3683300	3683472	+	24	Solyc01g009500		put_hAT	ms142837_SL3.0ch01_DTX-incomp_SL3_120k-B-R325-Map20
3754942	Cluster_837	SL3.0ch01	nc_RNA	3754838	3754942	+	24		PROM_Solyc01g009565
3754942	Cluster_837	SL3.0ch01	nc_RNA	3754838	3754942	+	24		PROM_Solyc01g009570
3756128	Cluster_838	SL3.0ch01	nc_RNA	3755481	3756128	*	21	Solyc01g009565
3759495	Cluster_839	SL3.0ch01	nc_RNA	3758981	3759495	*	24			Gypsy	ms143520_SL3.0ch01_RLX-comp_SL3_120k-B-P108.118-Map6
3763851	Cluster_840	SL3.0ch01	nc_RNA	3763492	3763851	*	24	Solyc01g009580
3772391	Cluster_841	SL3.0ch01	nc_RNA	3771936	3772391	*	24		PROM_Solyc01g009600
3792839	Cluster_842	SL3.0ch01	nc_RNA	3792628	3792839	+	24	Solyc01g009620
3794182	Cluster_843	SL3.0ch01	nc_RNA	3793831	3794182	+	N	Solyc01g009620
3812600	Cluster_844	SL3.0ch01	nc_RNA	3812204	3812600	-	24
3837618	Cluster_845	SL3.0ch01	nc_RNA	3837278	3837618	*	24
3911550	Cluster_846	SL3.0ch01	nc_RNA	3911351	3911550	*	24	Solyc01g009690	PROM_Solyc01g009700
3923227	Cluster_847	SL3.0ch01	nc_RNA	3922852	3923227	-	24			Unclassified	ms143998_SL3.0ch01_noCat_SL3_120k-B-R129-Map5
3924003	Cluster_848	SL3.0ch01	nc_RNA	3923598	3924003	*	24			Gypsy	ms144085_SL3.0ch01_RLX-incomp-chim_SL3_120k-B-R6950-Map7_reversed
3926201	Cluster_849	SL3.0ch01	nc_RNA	3925964	3926201	*	24	Solyc01g009715
3942798	Cluster_850	SL3.0ch01	nc_RNA	3942257	3942798	*	24			Copia	ms144936_SL3.0ch01_RLX-incomp_SL3_120k-B-R1346-Map13
3942798	Cluster_850	SL3.0ch01	nc_RNA	3942257	3942798	*	24				ms144085_SL3.0ch01_RLX-incomp-chim_SL3_120k-B-R6950-Map7_reversed-exon4
3963619	Cluster_851	SL3.0ch01	nc_RNA	3963095	3963619	*	24
3966291	Cluster_852	SL3.0ch01	nc_RNA	3966196	3966291	-	N
3982928	Cluster_853	SL3.0ch01	nc_RNA	3982590	3982928	+	N		PROM_Solyc01g009730
4056644	Cluster_854	SL3.0ch01	nc_RNA	4056294	4056644	-	N	Solyc01g009750
4071423	Cluster_855	SL3.0ch01	nc_RNA	4070969	4071423	*	24		PROM_Solyc01g009760
4088073	Cluster_856	SL3.0ch01	nc_RNA	4087202	4088073	*	24			Unclassified	ms13996_SL3.0ch01_noCat_SL3_120k-B-R4-Map18
4116606	Cluster_857	SL3.0ch01	nc_RNA	4116305	4116606	*	24				ms13996_SL3.0ch01_noCat_SL3_120k-B-R4-Map18-exon2
4133477	Cluster_858	SL3.0ch01	nc_RNA	4132668	4133477	*	24
4138154	Cluster_859	SL3.0ch01	nc_RNA	4137838	4138154	*	24		PROM_Solyc01g009780
4140993	Cluster_860	SL3.0ch01	nc_RNA	4139270	4140993	+	N	Solyc01g009780
4144157	Cluster_861	SL3.0ch01	nc_RNA	4143646	4144157	*	24
4153422	Cluster_862	SL3.0ch01	nc_RNA	4153210	4153422	+	24			Gypsy	ms526648_SL3.0ch01_RLX-incomp_SL3_120k-B-G1748-Map20
4204197	Cluster_863	SL3.0ch01	nc_RNA	4203741	4204197	*	24
4276949	Cluster_864	SL3.0ch01	nc_RNA	4276427	4276949	*	23
4294444	Cluster_865	SL3.0ch01	nc_RNA	4294293	4294444	+	24
4306450	Cluster_866	SL3.0ch01	nc_RNA	4306408	4306450	+	24	Solyc01g009850
4306450	Cluster_866	SL3.0ch01	nc_RNA	4306408	4306450	+	24	Solyc01g009845
4311107	Cluster_867	SL3.0ch01	nc_RNA	4310523	4311107	*	24
4318699	Cluster_868	SL3.0ch01	nc_RNA	4318367	4318699	-	24		PROM_Solyc01g009860
4333919	Cluster_869	SL3.0ch01	nc_RNA	4333674	4333919	*	24
4335342	Cluster_870	SL3.0ch01	nc_RNA	4334633	4335342	*	24
4337152	Cluster_871	SL3.0ch01	nc_RNA	4336285	4337152	*	N
4344417	Cluster_872	SL3.0ch01	nc_RNA	4343688	4344417	-	N		PROM_Solyc01g009870
4417080	Cluster_873	SL3.0ch01	nc_RNA	4416152	4417080	*	24				ms526648_SL3.0ch01_RLX-incomp_SL3_120k-B-G1748-Map20-exon1
4420401	Cluster_874	SL3.0ch01	nc_RNA	4420246	4420401	+	24
4442633	Cluster_875	SL3.0ch01	nc_RNA	4442082	4442633	*	24			Gypsy	ms276711_SL3.0ch01_RLX-incomp_SL3_120k-B-R1909-Map5
4453666	Cluster_876	SL3.0ch01	nc_RNA	4453467	4453666	*	24				ms276711_SL3.0ch01_RLX-incomp_SL3_120k-B-R1909-Map5-exon2
4461951	Cluster_877	SL3.0ch01	nc_RNA	4461559	4461951	*	24			Gypsy	ms145888_SL3.0ch01_RLX-comp_SL3_120k-B-R1432-Map9_reversed
4466393	Cluster_878	SL3.0ch01	nc_RNA	4466201	4466393	*	24			Gypsy	ms277117_SL3.0ch01_RLX-incomp_SL3_120k-B-R392-Map6_reversed
4466393	Cluster_878	SL3.0ch01	nc_RNA	4466201	4466393	*	24			Gypsy	ms548674_SL3.0ch01_RLX-incomp-chim_SL3_120k-B-G2005-Map9
4470161	Cluster_879	SL3.0ch01	nc_RNA	4469276	4470161	*	24			Copia	ms146425_SL3.0ch01_RYX-incomp-chim_SL3_120k-B-R20-Map20_reversed
4481258	Cluster_880	SL3.0ch01	nc_RNA	4480981	4481258	*	24
4481786	Cluster_881	SL3.0ch01	nc_RNA	4481499	4481786	-	24
4493238	Cluster_882	SL3.0ch01	nc_RNA	4493095	4493238	+	24
4509377	Cluster_883	SL3.0ch01	nc_RNA	4508735	4509377	*	24
4513304	Cluster_884	SL3.0ch01	nc_RNA	4513066	4513304	+	N
4514444	Cluster_885	SL3.0ch01	nc_RNA	4513995	4514444	*	24		PROM_Solyc01g009970	Confused_TE_withPotentialHostGeneDomain	ms146817_SL3.0ch01_RLX-incomp_SL3_120k-B-R5-Map20_reversed
4543448	Cluster_886	SL3.0ch01	nc_RNA	4543133	4543448	*	24				ms146817_SL3.0ch01_RLX-incomp_SL3_120k-B-R5-Map20_reversed-exon2
4548209	Cluster_887	SL3.0ch01	nc_RNA	4547775	4548209	*	24
4557219	Cluster_888	SL3.0ch01	nc_RNA	4557062	4557219	+	24
4570451	Cluster_889	SL3.0ch01	nc_RNA	4570163	4570451	*	24			Gypsy	ms554823_SL3.0ch01_RLX-incomp-chim_SL3_120k-B-R702-Map10
4576842	Cluster_890	SL3.0ch01	nc_RNA	4576146	4576842	*	24			Copia	ms147014_SL3.0ch01_RLX-incomp_SL3_120k-B-P73.8-Map20
4599009	Cluster_891	SL3.0ch01	nc_RNA	4597356	4599009	-	24	Solyc01g010030		Gypsy	ms147068_SL3.0ch01_RLX-incomp_SL3_120k-B-R392-Map6_reversed
4599009	Cluster_891	SL3.0ch01	nc_RNA	4597356	4599009	-	24	Solyc01g010030		Gypsy	ms147068_SL3.0ch01_RLX-incomp_SL3_120k-B-R392-Map6_reversed
4601215	Cluster_892	SL3.0ch01	nc_RNA	4599300	4601215	-	24	Solyc01g010035
4616142	Cluster_893	SL3.0ch01	nc_RNA	4615867	4616142	-	24
4624057	Cluster_894	SL3.0ch01	nc_RNA	4622639	4624057	*	N
4742294	Cluster_895	SL3.0ch01	nc_RNA	4741678	4742294	*	24	Solyc01g010080
4746770	Cluster_896	SL3.0ch01	nc_RNA	4746338	4746770	*	24	Solyc01g010080
4755710	Cluster_897	SL3.0ch01	nc_RNA	4755517	4755710	*	24		PROM_Solyc01g010083
4759629	Cluster_898	SL3.0ch01	nc_RNA	4759228	4759629	*	24
4763870	Cluster_899	SL3.0ch01	nc_RNA	4763331	4763870	*	24
4765437	Cluster_900	SL3.0ch01	nc_RNA	4765134	4765437	*	24
4770756	Cluster_901	SL3.0ch01	nc_RNA	4766458	4770756	*	24
4810897	Cluster_902	SL3.0ch01	nc_RNA	4810149	4810897	-	24
4815952	Cluster_903	SL3.0ch01	nc_RNA	4815430	4815952	*	24				ms147068_SL3.0ch01_RLX-incomp_SL3_120k-B-R392-Map6_reversed-exon1
4817815	Cluster_904	SL3.0ch01	nc_RNA	4817523	4817815	*	24
4832184	Cluster_905	SL3.0ch01	nc_RNA	4830857	4832184	*	24
4832772	Cluster_906	SL3.0ch01	nc_RNA	4832520	4832772	-	24
4834374	Cluster_907	SL3.0ch01	nc_RNA	4834207	4834374	-	24			Gypsy	ms147108_SL3.0ch01_RLX-incomp-chim_SL3_120k-B-R6950-Map7_reversed
4834818	Cluster_908	SL3.0ch01	nc_RNA	4834615	4834818	*	24
4852559	Cluster_909	SL3.0ch01	nc_RNA	4851870	4852559	*	24			Copia	ms147196_SL3.0ch01_RLX-incomp_SL3_120k-B-R29-Map20
4858660	Cluster_910	SL3.0ch01	nc_RNA	4858015	4858660	*	24
4859793	Cluster_911	SL3.0ch01	nc_RNA	4859377	4859793	*	24
4880023	Cluster_912	SL3.0ch01	nc_RNA	4879669	4880023	*	24
4901685	Cluster_913	SL3.0ch01	nc_RNA	4901465	4901685	*	24	Solyc01g010170		Confused_TE_withPotentialHostGeneDomain	ms409775_SL3.0ch01_RXX_SL3_120k-B-R2153-Map8
4902357	Cluster_914	SL3.0ch01	nc_RNA	4902124	4902357	+	21	Solyc01g010170		HostGene	ms409798_SL3.0ch01_PotentialHostGene_SL3_120k-B-R7815-Map13
4911556	Cluster_915	SL3.0ch01	nc_RNA	4911108	4911556	*	24		PROM_Solyc01g010180
4913122	Cluster_916	SL3.0ch01	nc_RNA	4911948	4913122	*	N
4914852	Cluster_917	SL3.0ch01	nc_RNA	4914693	4914852	*	24
4917590	Cluster_918	SL3.0ch01	nc_RNA	4917319	4917590	*	23
4921167	Cluster_919	SL3.0ch01	nc_RNA	4920025	4921167	*	N
4925723	Cluster_920	SL3.0ch01	nc_RNA	4924925	4925723	+	N	Solyc01g010200
4929374	Cluster_921	SL3.0ch01	nc_RNA	4927653	4929374	*	N
4931425	Cluster_922	SL3.0ch01	nc_RNA	4931199	4931425	*	24
4940134	Cluster_923	SL3.0ch01	nc_RNA	4939394	4940134	*	21	Solyc01g010220
4944801	Cluster_924	SL3.0ch01	nc_RNA	4944111	4944801	-	N
4972866	Cluster_925	SL3.0ch01	nc_RNA	4972148	4972866	*	23
4982585	Cluster_926	SL3.0ch01	nc_RNA	4982528	4982585	+	24			Copia	ms528662_SL3.0ch01_RLX-incomp_SL3_120k-B-R4194-Map10
4982941	Cluster_927	SL3.0ch01	nc_RNA	4982703	4982941	*	23
4996109	Cluster_928	SL3.0ch01	nc_RNA	4995485	4996109	*	24			Confused_TE	ms541663_SL3.0ch01_RLX-incomp-chim_SL3_120k-B-R620-Map17_reversed
4999428	Cluster_929	SL3.0ch01	nc_RNA	4998923	4999428	*	24	Solyc01g010260
5005536	Cluster_930	SL3.0ch01	nc_RNA	5004870	5005536	-	23			Copia	ms279761_SL3.0ch01_RLX-incomp_SL3_120k-B-G1955-Map5_reversed
5005536	Cluster_930	SL3.0ch01	nc_RNA	5004870	5005536	-	23			Copia	ms527332_SL3.0ch01_RLX-incomp_SL3_120k-B-R4191-Map8_reversed
5013692	Cluster_931	SL3.0ch01	nc_RNA	5013575	5013692	-	24
5019866	Cluster_932	SL3.0ch01	nc_RNA	5019710	5019866	+	23		PROM_Solyc01g010280
5020884	Cluster_933	SL3.0ch01	nc_RNA	5020483	5020884	*	24			Gypsy	ms149508_SL3.0ch01_RLX-incomp-chim_SL3_120k-B-R702-Map10
5041414	Cluster_934	SL3.0ch01	nc_RNA	5041183	5041414	-	24				ms149508_SL3.0ch01_RLX-incomp-chim_SL3_120k-B-R702-Map10-exon2
5067590	Cluster_935	SL3.0ch01	nc_RNA	5067141	5067590	*	24
5073057	Cluster_936	SL3.0ch01	nc_RNA	5072386	5073057	*	24
5090974	Cluster_937	SL3.0ch01	nc_RNA	5090845	5090974	-	23
5093569	Cluster_938	SL3.0ch01	nc_RNA	5092927	5093569	*	24
5119975	Cluster_939	SL3.0ch01	nc_RNA	5119343	5119975	-	N			Copia	ms149582_SL3.0ch01_RIX-incomp-chim_SL3_120k-B-P50.56-Map20
5129413	Cluster_940	SL3.0ch01	nc_RNA	5127951	5129413	*	24
5134041	Cluster_941	SL3.0ch01	nc_RNA	5133716	5134041	*	24			Gypsy	ms149712_SL3.0ch01_RLX-incomp_SL3_120k-B-R1078-Map6_reversed
5160188	Cluster_942	SL3.0ch01	nc_RNA	5160106	5160188	+	24
5161332	Cluster_943	SL3.0ch01	nc_RNA	5161081	5161332	*	24			EPRV	ms149915_SL3.0ch01_RLX-incomp_SL3_120k-B-R1955-Map8_reversed
5168163	Cluster_944	SL3.0ch01	nc_RNA	5167957	5168163	*	24				ms149915_SL3.0ch01_RLX-incomp_SL3_120k-B-R1955-Map8_reversed-exon1
5186249	Cluster_945	SL3.0ch01	nc_RNA	5185933	5186249	-	N			TIR_MITEov10	ms150202_SL3.0ch01_DTX-incomp_SL3_120k-B-G1011-Map13
5198910	Cluster_946	SL3.0ch01	nc_RNA	5198416	5198910	*	N		PROM_Solyc01g010390
5214298	Cluster_947	SL3.0ch01	nc_RNA	5213969	5214298	-	24
5224362	Cluster_948	SL3.0ch01	nc_RNA	5223958	5224362	-	N
5227423	Cluster_949	SL3.0ch01	nc_RNA	5227269	5227423	+	24
5235891	Cluster_950	SL3.0ch01	nc_RNA	5235712	5235891	-	N
5261287	Cluster_951	SL3.0ch01	nc_RNA	5260980	5261287	*	24			HostGene	ms150206_SL3.0ch01_noCat_SL3_120k-B-R1062-Map7
5269953	Cluster_952	SL3.0ch01	nc_RNA	5268815	5269953	*	24
5283318	Cluster_953	SL3.0ch01	nc_RNA	5282988	5283318	*	24		PROM_Solyc01g010430
5284063	Cluster_954	SL3.0ch01	nc_RNA	5283674	5284063	+	N	Solyc01g010430
5285722	Cluster_955	SL3.0ch01	nc_RNA	5284435	5285722	*	N	Solyc01g010430
5288197	Cluster_956	SL3.0ch01	nc_RNA	5285851	5288197	*	N
5292901	Cluster_957	SL3.0ch01	nc_RNA	5292129	5292901	-	N	Solyc01g010440
5299578	Cluster_958	SL3.0ch01	nc_RNA	5298996	5299578	*	24		PROM_Solyc01g010460
5318781	Cluster_959	SL3.0ch01	nc_RNA	5318054	5318781	*	24
5321466	Cluster_960	SL3.0ch01	nc_RNA	5321264	5321466	*	24		PROM_Solyc01g010490	Unclassified	ms150207_SL3.0ch01_noCat_SL3_120k-B-R1063-Map5
5356049	Cluster_961	SL3.0ch01	nc_RNA	5355997	5356049	*	24
5390618	Cluster_962	SL3.0ch01	nc_RNA	5390008	5390618	*	24
5391184	Cluster_963	SL3.0ch01	nc_RNA	5390742	5391184	*	24
5405364	Cluster_964	SL3.0ch01	nc_RNA	5405104	5405364	*	24			Unclassified	ms150208_SL3.0ch01_noCat_SL3_120k-B-R1063-Map5
5447199	Cluster_965	SL3.0ch01	nc_RNA	5445737	5447199	*	24	Solyc01g010506
5451837	Cluster_966	SL3.0ch01	nc_RNA	5451682	5451837	+	N	Solyc01g010508
5461544	Cluster_967	SL3.0ch01	nc_RNA	5461160	5461544	*	24
5463532	Cluster_968	SL3.0ch01	nc_RNA	5463264	5463532	*	24
5464823	Cluster_969	SL3.0ch01	nc_RNA	5463933	5464823	*	24
5465194	Cluster_970	SL3.0ch01	nc_RNA	5464905	5465194	*	24
5499442	Cluster_971	SL3.0ch01	nc_RNA	5499055	5499442	+	N	Solyc01g010540
5506913	Cluster_972	SL3.0ch01	nc_RNA	5506493	5506913	*	24
5524579	Cluster_973	SL3.0ch01	nc_RNA	5523901	5524579	*	24
5536596	Cluster_974	SL3.0ch01	nc_RNA	5536215	5536596	+	N	Solyc01g010580
5537777	Cluster_975	SL3.0ch01	nc_RNA	5537209	5537777	+	N		PROM_Solyc01g010590
5538621	Cluster_976	SL3.0ch01	nc_RNA	5538161	5538621	*	24		PROM_Solyc01g010590
5546246	Cluster_977	SL3.0ch01	nc_RNA	5545935	5546246	*	24
5550703	Cluster_978	SL3.0ch01	nc_RNA	5549983	5550703	*	24
5551154	Cluster_979	SL3.0ch01	nc_RNA	5550988	5551154	*	24
5555628	Cluster_980	SL3.0ch01	nc_RNA	5555185	5555628	*	24		PROM_Solyc01g010600	Unclassified	ms150209_SL3.0ch01_noCat_SL3_120k-B-R1063-Map5
5598527	Cluster_981	SL3.0ch01	nc_RNA	5597863	5598527	*	24
5667731	Cluster_982	SL3.0ch01	nc_RNA	5664919	5667731	*	24
5668360	Cluster_983	SL3.0ch01	nc_RNA	5668082	5668360	-	24
5669753	Cluster_984	SL3.0ch01	nc_RNA	5669265	5669753	*	24
5675929	Cluster_985	SL3.0ch01	nc_RNA	5675618	5675929	*	24		PROM_Solyc01g010700	HostGene	ms150211_SL3.0ch01_noCat_SL3_120k-B-R1066-Map7
5683631	Cluster_986	SL3.0ch01	nc_RNA	5683349	5683631	-	24			EPRV	ms150231_SL3.0ch01_RLX-incomp_SL3_120k-B-R1955-Map8_reversed
5686300	Cluster_987	SL3.0ch01	nc_RNA	5685762	5686300	*	24		PROM_Solyc01g010710
5687070	Cluster_988	SL3.0ch01	nc_RNA	5686724	5687070	+	24
5691889	Cluster_989	SL3.0ch01	nc_RNA	5691135	5691889	*	24	Solyc01g010720		HostGene	ms150345_SL3.0ch01_noCat_SL3_120k-B-R1066-Map7
5702634	Cluster_990	SL3.0ch01	nc_RNA	5702278	5702634	*	24	Solyc01g010720
5706939	Cluster_991	SL3.0ch01	nc_RNA	5706535	5706939	*	24
5710516	Cluster_992	SL3.0ch01	nc_RNA	5710330	5710516	-	24
5717833	Cluster_993	SL3.0ch01	nc_RNA	5717442	5717833	*	23			Copia_withPotentialHostGeneDomain	ms150394_SL3.0ch01_RLX-incomp_SL3_120k-B-R210-Map6
5717833	Cluster_993	SL3.0ch01	nc_RNA	5717442	5717833	*	23			Copia_withPotentialHostGeneDomain	ms150394_SL3.0ch01_RLX-incomp_SL3_120k-B-R210-Map6
5719369	Cluster_994	SL3.0ch01	nc_RNA	5719062	5719369	*	N				ms150394_SL3.0ch01_RLX-incomp_SL3_120k-B-R210-Map6-exon1
5720399	Cluster_995	SL3.0ch01	nc_RNA	5719869	5720399	*	24			HostGene	ms150454_SL3.0ch01_noCat_SL3_120k-B-R6423-Map5
5722375	Cluster_996	SL3.0ch01	nc_RNA	5722044	5722375	*	24	Solyc01g010740
5725024	Cluster_997	SL3.0ch01	nc_RNA	5724579	5725024	*	24	Solyc01g010740
5726868	Cluster_998	SL3.0ch01	nc_RNA	5726254	5726868	-	N		PROM_Solyc01g010740
5727976	Cluster_999	SL3.0ch01	nc_RNA	5727740	5727976	-	N	Solyc01g010750
5731683	Cluster_1000	SL3.0ch01	nc_RNA	5730997	5731683	-	N	Solyc01g010750
5742627	Cluster_1001	SL3.0ch01	nc_RNA	5742364	5742627	-	N
5747665	Cluster_1002	SL3.0ch01	nc_RNA	5747360	5747665	*	24			Copia	ms150518_SL3.0ch01_RIX-incomp-chim_SL3_120k-B-P50.56-Map20
5756670	Cluster_1003	SL3.0ch01	nc_RNA	5756565	5756670	-	N
5757264	Cluster_1004	SL3.0ch01	nc_RNA	5757019	5757264	*	24
5758813	Cluster_1005	SL3.0ch01	nc_RNA	5758663	5758813	*	24			TIR_MITEov10	ms150522_SL3.0ch01_DTX-incomp_SL3_120k-B-R1100-Map5
5761847	Cluster_1006	SL3.0ch01	nc_RNA	5761120	5761847	*	24			put_hAT	ms413203_SL3.0ch01_DTX-incomp_SL3_120k-B-R325-Map20
5764664	Cluster_1007	SL3.0ch01	nc_RNA	5764416	5764664	*	24		PROM_Solyc01g010760
5771058	Cluster_1008	SL3.0ch01	nc_RNA	5770499	5771058	*	24	Solyc01g010770
5782671	Cluster_1009	SL3.0ch01	nc_RNA	5782164	5782671	*	24		PROM_Solyc01g010780	EPRV	ms151081_SL3.0ch01_RLX-incomp_SL3_120k-B-R1955-Map8_reversed
5784062	Cluster_1010	SL3.0ch01	nc_RNA	5783836	5784062	+	24				ms151211_SL3.0ch01_RLX-incomp_SL3_120k-B-G2070-Map20-exon2
5784062	Cluster_1010	SL3.0ch01	nc_RNA	5783836	5784062	+	24			Gypsy	ms151211_SL3.0ch01_RLX-incomp_SL3_120k-B-G2070-Map20
6149512	Cluster_1011	SL3.0ch01	nc_RNA	6148917	6149512	*	24			Gypsy	ms151235_SL3.0ch01_RLX-incomp_SL3_120k-B-R195-Map20
6150554	Cluster_1012	SL3.0ch01	nc_RNA	6150202	6150554	*	24
6155598	Cluster_1013	SL3.0ch01	nc_RNA	6155539	6155598	-	N	Solyc01g010810
6156124	Cluster_1014	SL3.0ch01	nc_RNA	6155789	6156124	*	24	Solyc01g010810
6170770	Cluster_1015	SL3.0ch01	nc_RNA	6168637	6170770	+	N	Solyc01g010820
6183491	Cluster_1016	SL3.0ch01	nc_RNA	6183003	6183491	*	N
6184496	Cluster_1017	SL3.0ch01	nc_RNA	6183664	6184496	*	N
6187931	Cluster_1018	SL3.0ch01	nc_RNA	6187534	6187931	*	24			hAT_withPotentialHostGeneDomain	ms151633_SL3.0ch01_DTX-incomp_SL3_120k-B-R5803-Map6
6187931	Cluster_1018	SL3.0ch01	nc_RNA	6187534	6187931	*	24			TIR_MITEov10	ms544538_SL3.0ch01_DTX-incomp_SL3_120k-B-P256.313-Map18
6243111	Cluster_1019	SL3.0ch01	nc_RNA	6242790	6243111	*	24		PROM_Solyc01g010860	Confused_TE_withPotentialHostGeneDomain	ms282888_SL3.0ch01_RLX-incomp_SL3_120k-B-R7791-Map20
6250429	Cluster_1020	SL3.0ch01	nc_RNA	6249805	6250429	-	N	Solyc01g010870
6254931	Cluster_1021	SL3.0ch01	nc_RNA	6254270	6254931	-	N	Solyc01g010870
6287504	Cluster_1022	SL3.0ch01	nc_RNA	6287164	6287504	*	24	Solyc01g010890
6379328	Cluster_1023	SL3.0ch01	nc_RNA	6379215	6379328	*	24	Solyc01g010910
6382078	Cluster_1024	SL3.0ch01	nc_RNA	6381341	6382078	*	24
6417294	Cluster_1025	SL3.0ch01	nc_RNA	6417178	6417294	-	24	Solyc01g010937	PROM_Solyc01g010930	Unclassified	ms200101_SL3.0ch01_noCat_SL3_120k-B-R703-Map5
6431938	Cluster_1026	SL3.0ch01	nc_RNA	6431766	6431938	*	24
6432577	Cluster_1027	SL3.0ch01	nc_RNA	6432281	6432577	*	24
6437162	Cluster_1028	SL3.0ch01	nc_RNA	6437066	6437162	+	24		PROM_Solyc01g010940
6455942	Cluster_1029	SL3.0ch01	nc_RNA	6455711	6455942	*	24	Solyc01g010950
6458617	Cluster_1030	SL3.0ch01	nc_RNA	6458062	6458617	-	24		PROM_Solyc01g010950
6557096	Cluster_1031	SL3.0ch01	nc_RNA	6556651	6557096	*	24
6563649	Cluster_1032	SL3.0ch01	nc_RNA	6563207	6563649	*	24
6580983	Cluster_1033	SL3.0ch01	nc_RNA	6580497	6580983	+	24
6583084	Cluster_1034	SL3.0ch01	nc_RNA	6582522	6583084	-	24			Unclassified	ms414611_SL3.0ch01_noCat_SL3_120k-B-P4.84-Map20
6583084	Cluster_1034	SL3.0ch01	nc_RNA	6582522	6583084	-	24			Unclassified	ms112792_SL3.0ch01_noCat_SL3_120k-B-P396.231-Map7
6613209	Cluster_1035	SL3.0ch01	nc_RNA	6612903	6613209	*	22	Solyc01g010980		Gypsy	ms112829_SL3.0ch01_RLX-incomp-chim_SL3_120k-B-R702-Map10
6613209	Cluster_1035	SL3.0ch01	nc_RNA	6612903	6613209	*	22	Solyc01g010980		TIR_MITEov10	ms118562_SL3.0ch01_DTX-incomp_SL3_120k-B-G1011-Map13
6800410	Cluster_1036	SL3.0ch01	nc_RNA	6800252	6800410	+	21
6803063	Cluster_1037	SL3.0ch01	nc_RNA	6802711	6803063	-	N	Solyc01g011000
6803506	Cluster_1038	SL3.0ch01	nc_RNA	6803309	6803506	-	N	Solyc01g011000
6954710	Cluster_1039	SL3.0ch01	nc_RNA	6954518	6954710	*	24			Confused_TE_withPotentialHostGeneDomain	ms152958_SL3.0ch01_DTX-incomp-chim_SL3_120k-B-R6897-Map7_reversed
6954984	Cluster_1040	SL3.0ch01	nc_RNA	6954801	6954984	*	24
6968094	Cluster_1041	SL3.0ch01	nc_RNA	6967599	6968094	*	24
6970438	Cluster_1042	SL3.0ch01	nc_RNA	6970366	6970438	-	24	Solyc01g011050
6970964	Cluster_1043	SL3.0ch01	nc_RNA	6970897	6970964	+	23	Solyc01g011050
6984296	Cluster_1044	SL3.0ch01	nc_RNA	6983596	6984296	*	24			TIR_MITEov10	ms153136_SL3.0ch01_DXX-MITE_SL3_120k-B-R840-Map11
6986663	Cluster_1045	SL3.0ch01	nc_RNA	6985881	6986663	+	N			Copia	ms153669_SL3.0ch01_RLX-comp_SL3_120k-B-G251-Map7_reversed
6998446	Cluster_1046	SL3.0ch01	nc_RNA	6998018	6998446	-	N
7380441	Cluster_1047	SL3.0ch01	nc_RNA	7380193	7380441	*	24
7431996	Cluster_1048	SL3.0ch01	nc_RNA	7431960	7431996	+	24			Unclassified	ms416350_SL3.0ch01_noCat_SL3_120k-B-R7215-Map5
7527322	Cluster_1049	SL3.0ch01	nc_RNA	7527070	7527322	*	24			HostGene	ms154580_SL3.0ch01_PotentialHostGene_SL3_120k-B-R7815-Map13
7527322	Cluster_1049	SL3.0ch01	nc_RNA	7527070	7527322	*	24			Gypsy	ms154850_SL3.0ch01_RLX-incomp_SL3_120k-B-R665-Map19
7529861	Cluster_1050	SL3.0ch01	nc_RNA	7529778	7529861	-	22
7548731	Cluster_1051	SL3.0ch01	nc_RNA	7548474	7548731	+	24		PROM_Solyc01g011091	Unclassified	ms419044_SL3.0ch01_noCat_SL3_120k-B-G308-Map20
7548731	Cluster_1051	SL3.0ch01	nc_RNA	7548474	7548731	+	24		PROM_Solyc01g011090	Unclassified	ms419044_SL3.0ch01_noCat_SL3_120k-B-G308-Map20
7558414	Cluster_1052	SL3.0ch01	nc_RNA	7556686	7558414	*	24	Solyc01g011091		Gypsy	ms155104_SL3.0ch01_RLX-incomp_SL3_120k-B-R392-Map6_reversed
7579055	Cluster_1053	SL3.0ch01	nc_RNA	7578670	7579055	*	24
7618519	Cluster_1054	SL3.0ch01	nc_RNA	7618167	7618519	-	N
7985753	Cluster_1055	SL3.0ch01	nc_RNA	7985560	7985753	-	24
8100488	Cluster_1056	SL3.0ch01	nc_RNA	8100399	8100488	+	N		PROM_Solyc01g011230
8617001	Cluster_1057	SL3.0ch01	nc_RNA	8616907	8617001	+	N	Solyc01g011335	PROM_Solyc01g011333
8647485	Cluster_1058	SL3.0ch01	nc_RNA	8646781	8647485	-	N	Solyc01g011350
8649360	Cluster_1059	SL3.0ch01	nc_RNA	8649181	8649360	*	21		PROM_Solyc01g011350
8697850	Cluster_1060	SL3.0ch01	nc_RNA	8697105	8697850	*	24			hAT	ms155170_SL3.0ch01_DTX-incomp_SL3_120k-B-G1812-Map20_reversed
8738855	Cluster_1061	SL3.0ch01	nc_RNA	8738038	8738855	*	24
8954842	Cluster_1062	SL3.0ch01	nc_RNA	8954622	8954842	-	N	Solyc01g011410
9051539	Cluster_1063	SL3.0ch01	nc_RNA	9051410	9051539	*	N	Solyc01g011415
9322012	Cluster_1064	SL3.0ch01	nc_RNA	9321816	9322012	*	24			put_hAT	ms155234_SL3.0ch01_DTX-incomp_SL3_120k-B-R325-Map20
9339750	Cluster_1065	SL3.0ch01	nc_RNA	9339508	9339750	+	24			Copia	ms155261_SL3.0ch01_RLX-comp_SL3_120k-B-R622-Map7
9339750	Cluster_1065	SL3.0ch01	nc_RNA	9339508	9339750	+	24			Gypsy	ms548690_SL3.0ch01_RLX-incomp-chim_SL3_120k-B-R3420-Map5_reversed
9343044	Cluster_1066	SL3.0ch01	nc_RNA	9342577	9343044	*	23
9402576	Cluster_1067	SL3.0ch01	nc_RNA	9401813	9402576	*	24
9483465	Cluster_1068	SL3.0ch01	nc_RNA	9482862	9483465	*	24	Solyc01g011510
9488636	Cluster_1069	SL3.0ch01	nc_RNA	9488474	9488636	*	24	Solyc01g011510
9659256	Cluster_1070	SL3.0ch01	nc_RNA	9659107	9659256	-	N
10019554	Cluster_1071	SL3.0ch01	nc_RNA	10019394	10019554	-	24	Solyc01g012760
10241294	Cluster_1072	SL3.0ch01	nc_RNA	10241159	10241294	*	24	Solyc01g013885		Confused_TE	ms155627_SL3.0ch01_RLX-incomp-chim_SL3_120k-B-R620-Map17_reversed
10241294	Cluster_1072	SL3.0ch01	nc_RNA	10241159	10241294	*	24	Solyc01g013885		Copia	ms155564_SL3.0ch01_RYX-incomp-chim_SL3_120k-B-R20-Map20_reversed
10242463	Cluster_1073	SL3.0ch01	nc_RNA	10242301	10242463	*	24	Solyc01g013885
10356030	Cluster_1074	SL3.0ch01	nc_RNA	10356009	10356030	+	N			Gypsy	ms155887_SL3.0ch01_RLX-incomp_SL3_120k-B-R1735-Map10
10757130	Cluster_1075	SL3.0ch01	nc_RNA	10756516	10757130	*	24
10757520	Cluster_1076	SL3.0ch01	nc_RNA	10757224	10757520	-	22			Confused_TE	ms156225_SL3.0ch01_RIX-incomp_SL3_120k-B-R1553-Map20
10763965	Cluster_1077	SL3.0ch01	nc_RNA	10763633	10763965	*	22			hAT	ms156267_SL3.0ch01_DTX-incomp_SL3_120k-B-R3692-Map5
11573725	Cluster_1078	SL3.0ch01	nc_RNA	11572681	11573725	*	24
11581957	Cluster_1079	SL3.0ch01	nc_RNA	11581707	11581957	*	24	Solyc01g014103
11590992	Cluster_1080	SL3.0ch01	nc_RNA	11590559	11590992	*	24
11592545	Cluster_1081	SL3.0ch01	nc_RNA	11592346	11592545	-	24
11629023	Cluster_1082	SL3.0ch01	nc_RNA	11628764	11629023	*	24		PROM_Solyc01g014140
11697795	Cluster_1083	SL3.0ch01	nc_RNA	11696778	11697795	-	N
11869207	Cluster_1084	SL3.0ch01	nc_RNA	11866722	11869207	+	N	Solyc01g014245
11890258	Cluster_1085	SL3.0ch01	nc_RNA	11889848	11890258	*	24		PROM_Solyc01g014270
11911383	Cluster_1086	SL3.0ch01	nc_RNA	11910941	11911383	+	24			hAT	ms156267_SL3.0ch01_DTX-incomp_SL3_120k-B-R3692-Map5
11919778	Cluster_1087	SL3.0ch01	nc_RNA	11919551	11919778	+	N
11923455	Cluster_1088	SL3.0ch01	nc_RNA	11922947	11923455	-	24
11946087	Cluster_1089	SL3.0ch01	nc_RNA	11945294	11946087	*	24			hAT	ms156268_SL3.0ch01_DTX-incomp_SL3_120k-B-R3692-Map5
11946087	Cluster_1089	SL3.0ch01	nc_RNA	11945294	11946087	*	24			hAT	ms156267_SL3.0ch01_DTX-incomp_SL3_120k-B-R3692-Map5
12020589	Cluster_1090	SL3.0ch01	nc_RNA	12020202	12020589	*	24			hAT	ms156268_SL3.0ch01_DTX-incomp_SL3_120k-B-R3692-Map5
12140075	Cluster_1091	SL3.0ch01	nc_RNA	12139914	12140075	*	24
12140899	Cluster_1092	SL3.0ch01	nc_RNA	12140675	12140899	*	24				ms156268_SL3.0ch01_DTX-incomp_SL3_120k-B-R3692-Map5-exon2
12142541	Cluster_1093	SL3.0ch01	nc_RNA	12142108	12142541	*	24
12202436	Cluster_1094	SL3.0ch01	nc_RNA	12201738	12202436	*	22				ms156268_SL3.0ch01_DTX-incomp_SL3_120k-B-R3692-Map5-exon2
12260475	Cluster_1095	SL3.0ch01	nc_RNA	12260190	12260475	-	24			Unclassified	ms113439_SL3.0ch01_noCat_SL3_120k-B-R3817-Map10
12649886	Cluster_1096	SL3.0ch01	nc_RNA	12649249	12649886	*	24				ms156590_SL3.0ch01_RLX-incomp_SL3_120k-B-G1580-Map6_reversed-exon2
12649886	Cluster_1096	SL3.0ch01	nc_RNA	12649249	12649886	*	24			Gypsy	ms156590_SL3.0ch01_RLX-incomp_SL3_120k-B-G1580-Map6_reversed
12653693	Cluster_1097	SL3.0ch01	nc_RNA	12653223	12653693	*	24
13898967	Cluster_1098	SL3.0ch01	nc_RNA	13898790	13898967	*	24			EPRV	ms157222_SL3.0ch01_RLX-incomp_SL3_120k-B-G2038-Map13_reversed
13908894	Cluster_1099	SL3.0ch01	nc_RNA	13908314	13908894	*	24
13916251	Cluster_1100	SL3.0ch01	nc_RNA	13915702	13916251	-	24	Solyc01g014490		Unclassified	ms157248_SL3.0ch01_noCat_SL3_120k-B-R129-Map5
13916575	Cluster_1101	SL3.0ch01	nc_RNA	13916338	13916575	-	24	Solyc01g014490		HostGene	ms157381_SL3.0ch01_PotentialHostGene_SL3_120k-B-R7815-Map13
13916888	Cluster_1102	SL3.0ch01	nc_RNA	13916663	13916888	-	24	Solyc01g014490		HostGene	ms157488_SL3.0ch01_PotentialHostGene_SL3_120k-B-R7815-Map13
13917520	Cluster_1103	SL3.0ch01	nc_RNA	13917268	13917520	-	22	Solyc01g014490		PutativeNoutoClassII	ms289046_SL3.0ch01_DXX-MITE_SL3_120k-B-R1964-Map5
13917520	Cluster_1103	SL3.0ch01	nc_RNA	13917268	13917520	-	22	Solyc01g014490		Copia_withPotentialHostGeneDomain	ms118725_SL3.0ch01_RLX-incomp_SL3_120k-B-R7657-Map20_reversed
13918752	Cluster_1104	SL3.0ch01	nc_RNA	13917874	13918752	-	24	Solyc01g014490		HostGene	ms289058_SL3.0ch01_noCat_SL3_120k-B-R3049-Map6
13918752	Cluster_1104	SL3.0ch01	nc_RNA	13917874	13918752	-	24	Solyc01g014490		Confused_TE	ms289090_SL3.0ch01_RIX-incomp_SL3_120k-B-R6856-Map5
14274531	Cluster_1105	SL3.0ch01	nc_RNA	14274119	14274531	-	24			SAT	ms289098_SL3.0ch01_RXX-TRIM_SL3_120k-B-R725-Map6
14626282	Cluster_1106	SL3.0ch01	nc_RNA	14625882	14626282	*	24			SSR	ms289224_SL3.0ch01_SSR_SL3_120k-B-P129.242-Map20
14725907	Cluster_1107	SL3.0ch01	nc_RNA	14725175	14725907	+	24			EPRV	ms158570_SL3.0ch01_RLX-incomp_SL3_120k-B-G2038-Map13_reversed
14731063	Cluster_1108	SL3.0ch01	nc_RNA	14726042	14731063	+	22
14817380	Cluster_1109	SL3.0ch01	nc_RNA	14816625	14817380	-	24
14826887	Cluster_1110	SL3.0ch01	nc_RNA	14826252	14826887	*	24
14991034	Cluster_1111	SL3.0ch01	nc_RNA	14990456	14991034	*	24			Gypsy	ms159391_SL3.0ch01_RLX-incomp_SL3_120k-B-G244-Map20
14991034	Cluster_1111	SL3.0ch01	nc_RNA	14990456	14991034	*	24			EPRV	ms158677_SL3.0ch01_RLX-incomp_SL3_120k-B-G2031-Map7
15238777	Cluster_1112	SL3.0ch01	nc_RNA	15238699	15238777	+	23			Gypsy	ms159609_SL3.0ch01_RLX-incomp_SL3_120k-B-R1909-Map5
15238777	Cluster_1112	SL3.0ch01	nc_RNA	15238699	15238777	+	23				ms159609_SL3.0ch01_RLX-incomp_SL3_120k-B-R1909-Map5-exon2
15332901	Cluster_1113	SL3.0ch01	nc_RNA	15331959	15332901	*	24			Gypsy	ms223227_SL3.0ch01_RLX-incomp-chim_SL3_120k-B-R702-Map10
15332901	Cluster_1113	SL3.0ch01	nc_RNA	15331959	15332901	*	24			SAT	ms159686_SL3.0ch01_RXX-TRIM_SL3_120k-B-R725-Map6
15467177	Cluster_1114	SL3.0ch01	nc_RNA	15466875	15467177	*	24			Copia	ms159859_SL3.0ch01_RLX-incomp_SL3_120k-B-P15.43-Map10_reversed
15484814	Cluster_1115	SL3.0ch01	nc_RNA	15483565	15484814	*	24
15493430	Cluster_1116	SL3.0ch01	nc_RNA	15492998	15493430	+	24			Unclassified	ms159935_SL3.0ch01_noCat_SL3_120k-B-R3120-Map5
15503287	Cluster_1117	SL3.0ch01	nc_RNA	15502676	15503287	*	24
15503858	Cluster_1118	SL3.0ch01	nc_RNA	15503656	15503858	-	24		PROM_Solyc01g014830
15511421	Cluster_1119	SL3.0ch01	nc_RNA	15510534	15511421	*	24		PROM_Solyc01g014840	Unclassified	ms159937_SL3.0ch01_noCat_SL3_120k-B-R3197-Map5
15925858	Cluster_1120	SL3.0ch01	nc_RNA	15925471	15925858	+	24			PutativeNoutoClassII	ms160671_SL3.0ch01_DXX_SL3_120k-B-R2407-Map6
16017806	Cluster_1121	SL3.0ch01	nc_RNA	16017673	16017806	-	24			Gypsy	ms160782_SL3.0ch01_RLX-incomp_SL3_120k-B-G249-Map5
16538972	Cluster_1122	SL3.0ch01	nc_RNA	16536430	16538972	+	N	Solyc01g015020
16617431	Cluster_1123	SL3.0ch01	nc_RNA	16616844	16617431	*	24				ms160782_SL3.0ch01_RLX-incomp_SL3_120k-B-G249-Map5-exon1
16729956	Cluster_1124	SL3.0ch01	nc_RNA	16729029	16729956	*	24
17554882	Cluster_1125	SL3.0ch01	nc_RNA	17554726	17554882	-	24			Unclassified	ms160839_SL3.0ch01_noCat_SL3_120k-B-R2470-Map11
17965672	Cluster_1126	SL3.0ch01	nc_RNA	17965100	17965672	*	24			PutativeNoutoClassII	ms161113_SL3.0ch01_DXX_SL3_120k-B-P7.236-Map20_reversed
17965672	Cluster_1126	SL3.0ch01	nc_RNA	17965100	17965672	*	24				ms160839_SL3.0ch01_noCat_SL3_120k-B-R2470-Map11-exon2
18553249	Cluster_1127	SL3.0ch01	nc_RNA	18552311	18553249	*	24
19002173	Cluster_1128	SL3.0ch01	nc_RNA	19002017	19002173	*	24
19404176	Cluster_1129	SL3.0ch01	nc_RNA	19403870	19404176	*	24	Solyc01g016390	PROM_Solyc01g016380
19404664	Cluster_1130	SL3.0ch01	nc_RNA	19404488	19404664	*	24	Solyc01g016390	PROM_Solyc01g016380
19408240	Cluster_1131	SL3.0ch01	nc_RNA	19407909	19408240	*	24			Unclassified	ms161165_SL3.0ch01_noCat_SL3_120k-B-G1555-Map7
19409939	Cluster_1132	SL3.0ch01	nc_RNA	19409676	19409939	*	24			Unclassified	ms161210_SL3.0ch01_noCat_SL3_120k-B-G308-Map20
19421617	Cluster_1133	SL3.0ch01	nc_RNA	19421096	19421617	-	24
19782322	Cluster_1134	SL3.0ch01	nc_RNA	19782142	19782322	+	24			SSR	ms289037_SL3.0ch01_SSR_SL3_120k-B-R1121-Map20
20375965	Cluster_1135	SL3.0ch01	nc_RNA	20375635	20375965	*	24
20449612	Cluster_1136	SL3.0ch01	nc_RNA	20449362	20449612	-	24			Unclassified	ms108441_SL3.0ch01_noCat_SL3_120k-B-R6304-Map6
20664439	Cluster_1137	SL3.0ch01	nc_RNA	20663970	20664439	*	24			Unclassified	ms161419_SL3.0ch01_noCat_SL3_120k-B-G512-Map6
21064573	Cluster_1138	SL3.0ch01	nc_RNA	21063590	21064573	*	24
22515117	Cluster_1139	SL3.0ch01	nc_RNA	22514994	22515117	-	22			Confused_TE	ms161516_SL3.0ch01_RLX-incomp-chim_SL3_120k-B-R7766-Map11_reversed
22868234	Cluster_1140	SL3.0ch01	nc_RNA	22868096	22868234	-	N			HostGene	ms161522_SL3.0ch01_PotentialHostGene_SL3_120k-B-R7815-Map13
22998659	Cluster_1141	SL3.0ch01	nc_RNA	22998561	22998659	-	N				ms161627_SL3.0ch01_RLX-comp_SL3_120k-B-R109-Map6-exon1
22998659	Cluster_1141	SL3.0ch01	nc_RNA	22998561	22998659	-	N			Copia	ms161627_SL3.0ch01_RLX-comp_SL3_120k-B-R109-Map6
23164013	Cluster_1142	SL3.0ch01	nc_RNA	23163776	23164013	+	24
23176307	Cluster_1143	SL3.0ch01	nc_RNA	23176071	23176307	+	24			PutativeNoutoClassII	ms161651_SL3.0ch01_DXX_SL3_120k-B-R2407-Map6
23447319	Cluster_1144	SL3.0ch01	nc_RNA	23447056	23447319	+	N
23689328	Cluster_1145	SL3.0ch01	nc_RNA	23689153	23689328	+	24			EPRV	ms161660_SL3.0ch01_RLX-incomp_SL3_120k-B-R2839-Map20_reversed
23710113	Cluster_1146	SL3.0ch01	nc_RNA	23709833	23710113	-	N	Solyc01g017050		TRIM_LARD	ms161696_SL3.0ch01_RXX-LARD_SL3_120k-B-R5522-Map5
23788657	Cluster_1147	SL3.0ch01	nc_RNA	23788500	23788657	+	N			Gypsy	ms161709_SL3.0ch01_RLX-incomp-chim_SL3_120k-B-R702-Map10
23790225	Cluster_1148	SL3.0ch01	nc_RNA	23790149	23790225	+	N		PROM_Solyc01g017060	SAT	ms161711_SL3.0ch01_RXX-LARD_SL3_120k-B-R722-Map11
23790225	Cluster_1148	SL3.0ch01	nc_RNA	23790149	23790225	+	N		PROM_Solyc01g017070	SAT	ms161711_SL3.0ch01_RXX-LARD_SL3_120k-B-R722-Map11
23790225	Cluster_1148	SL3.0ch01	nc_RNA	23790149	23790225	+	N		PROM_Solyc01g017080	SAT	ms161711_SL3.0ch01_RXX-LARD_SL3_120k-B-R722-Map11
23792536	Cluster_1149	SL3.0ch01	nc_RNA	23791829	23792536	*	N		PROM_Solyc01g017083
23796102	Cluster_1150	SL3.0ch01	nc_RNA	23795564	23796102	*	N		PROM_Solyc01g017110
23800062	Cluster_1151	SL3.0ch01	nc_RNA	23799866	23800062	+	N
23803213	Cluster_1152	SL3.0ch01	nc_RNA	23802964	23803213	-	N			Copia_withPotentialHostGeneDomain	ms161713_SL3.0ch01_RLX-incomp_SL3_120k-B-R7657-Map20_reversed
23806911	Cluster_1153	SL3.0ch01	nc_RNA	23806373	23806911	*	N		PROM_Solyc01g017180
23806911	Cluster_1153	SL3.0ch01	nc_RNA	23806373	23806911	*	N		PROM_Solyc01g017180
23806911	Cluster_1153	SL3.0ch01	nc_RNA	23806373	23806911	*	N		PROM_Solyc01g017170
23806911	Cluster_1153	SL3.0ch01	nc_RNA	23806373	23806911	*	N		PROM_Solyc01g017190
23807727	Cluster_1154	SL3.0ch01	nc_RNA	23807369	23807727	*	21		PROM_Solyc01g017183
23807727	Cluster_1154	SL3.0ch01	nc_RNA	23807369	23807727	*	21		PROM_Solyc01g017185
23807727	Cluster_1154	SL3.0ch01	nc_RNA	23807369	23807727	*	21		PROM_Solyc01g017190
23807727	Cluster_1154	SL3.0ch01	nc_RNA	23807369	23807727	*	21		PROM_Solyc01g017185
23807727	Cluster_1154	SL3.0ch01	nc_RNA	23807369	23807727	*	21		PROM_Solyc01g017183
23808424	Cluster_1155	SL3.0ch01	nc_RNA	23808022	23808424	+	N	Solyc01g017200	PROM_Solyc01g017187
23808424	Cluster_1155	SL3.0ch01	nc_RNA	23808022	23808424	+	N	Solyc01g017200	PROM_Solyc01g017200
23808424	Cluster_1155	SL3.0ch01	nc_RNA	23808022	23808424	+	N	Solyc01g017200	PROM_Solyc01g017187
23809480	Cluster_1156	SL3.0ch01	nc_RNA	23808711	23809480	*	N		PROM_Solyc01g017200
23811729	Cluster_1157	SL3.0ch01	nc_RNA	23811121	23811729	-	N		PROM_Solyc01g017230
23811729	Cluster_1157	SL3.0ch01	nc_RNA	23811121	23811729	-	N		PROM_Solyc01g017210
23813009	Cluster_1158	SL3.0ch01	nc_RNA	23811818	23813009	*	N		PROM_Solyc01g017230
23814869	Cluster_1159	SL3.0ch01	nc_RNA	23814674	23814869	*	N		PROM_Solyc01g017235	HostGene	ms161718_SL3.0ch01_PotentialHostGene_SL3_120k-B-R7815-Map13
23814869	Cluster_1159	SL3.0ch01	nc_RNA	23814674	23814869	*	N		PROM_Solyc01g017235	HostGene	ms161718_SL3.0ch01_PotentialHostGene_SL3_120k-B-R7815-Map13
23815504	Cluster_1160	SL3.0ch01	nc_RNA	23815010	23815504	*	N	Solyc01g017250	PROM_Solyc01g017240
23815504	Cluster_1160	SL3.0ch01	nc_RNA	23815010	23815504	*	N	Solyc01g017250	PROM_Solyc01g017240
23815504	Cluster_1160	SL3.0ch01	nc_RNA	23815010	23815504	*	N	Solyc01g017250	PROM_Solyc01g017245
23817313	Cluster_1161	SL3.0ch01	nc_RNA	23816753	23817313	+	N		PROM_Solyc01g017260
23817313	Cluster_1161	SL3.0ch01	nc_RNA	23816753	23817313	+	N		PROM_Solyc01g017250
23819135	Cluster_1162	SL3.0ch01	nc_RNA	23818834	23819135	+	N			Confused_TE	ms161793_SL3.0ch01_RIX-incomp_SL3_120k-B-P242.323-Map6
23854580	Cluster_1163	SL3.0ch01	nc_RNA	23854286	23854580	+	N	Solyc01g017330	PROM_Solyc01g017333	PutativeNoutoClassII	ms161828_SL3.0ch01_DXX_SL3_120k-B-R2407-Map6
23854580	Cluster_1163	SL3.0ch01	nc_RNA	23854286	23854580	+	N	Solyc01g017330	PROM_Solyc01g017320	PutativeNoutoClassII	ms161828_SL3.0ch01_DXX_SL3_120k-B-R2407-Map6
23854580	Cluster_1163	SL3.0ch01	nc_RNA	23854286	23854580	+	N	Solyc01g017300	PROM_Solyc01g017320	PutativeNoutoClassII	ms161828_SL3.0ch01_DXX_SL3_120k-B-R2407-Map6
23854580	Cluster_1163	SL3.0ch01	nc_RNA	23854286	23854580	+	N	Solyc01g017300	PROM_Solyc01g017310	PutativeNoutoClassII	ms161828_SL3.0ch01_DXX_SL3_120k-B-R2407-Map6
23854580	Cluster_1163	SL3.0ch01	nc_RNA	23854286	23854580	+	N	Solyc01g017330	PROM_Solyc01g017310	PutativeNoutoClassII	ms161828_SL3.0ch01_DXX_SL3_120k-B-R2407-Map6
23854580	Cluster_1163	SL3.0ch01	nc_RNA	23854286	23854580	+	N	Solyc01g017300	PROM_Solyc01g017333	PutativeNoutoClassII	ms161828_SL3.0ch01_DXX_SL3_120k-B-R2407-Map6
23856246	Cluster_1164	SL3.0ch01	nc_RNA	23855141	23856246	+	N	Solyc01g017330	PROM_Solyc01g017333
23856917	Cluster_1165	SL3.0ch01	nc_RNA	23856519	23856917	*	N
23858401	Cluster_1166	SL3.0ch01	nc_RNA	23857927	23858401	*	N		PROM_Solyc01g017360
23858401	Cluster_1166	SL3.0ch01	nc_RNA	23857927	23858401	*	N		PROM_Solyc01g017337
23860469	Cluster_1167	SL3.0ch01	nc_RNA	23859482	23860469	*	N
23861072	Cluster_1168	SL3.0ch01	nc_RNA	23860734	23861072	+	N	Solyc01g017370	PROM_Solyc01g017380
23861072	Cluster_1168	SL3.0ch01	nc_RNA	23860734	23861072	+	N	Solyc01g017370	PROM_Solyc01g017380
23861412	Cluster_1169	SL3.0ch01	nc_RNA	23861151	23861412	+	N		PROM_Solyc01g017390
23861412	Cluster_1169	SL3.0ch01	nc_RNA	23861151	23861412	+	N		PROM_Solyc01g017400
23861412	Cluster_1169	SL3.0ch01	nc_RNA	23861151	23861412	+	N		PROM_Solyc01g017390
23866236	Cluster_1170	SL3.0ch01	nc_RNA	23865919	23866236	-	N		PROM_Solyc01g017410
23866236	Cluster_1170	SL3.0ch01	nc_RNA	23865919	23866236	-	N		PROM_Solyc01g017410
23866236	Cluster_1170	SL3.0ch01	nc_RNA	23865919	23866236	-	N		PROM_Solyc01g017420
23867134	Cluster_1171	SL3.0ch01	nc_RNA	23866467	23867134	*	N	Solyc01g017420	PROM_Solyc01g017460
23867134	Cluster_1171	SL3.0ch01	nc_RNA	23866467	23867134	*	N	Solyc01g017420	PROM_Solyc01g017460
23868211	Cluster_1172	SL3.0ch01	nc_RNA	23867729	23868211	*	21	Solyc01g017460	PROM_Solyc01g017430
23868211	Cluster_1172	SL3.0ch01	nc_RNA	23867729	23868211	*	21	Solyc01g017460	PROM_Solyc01g017430
23869731	Cluster_1173	SL3.0ch01	nc_RNA	23869303	23869731	*	N	Solyc01g017460
23870674	Cluster_1174	SL3.0ch01	nc_RNA	23869807	23870674	*	N	Solyc01g017460	PROM_Solyc01g017440
23871184	Cluster_1175	SL3.0ch01	nc_RNA	23870785	23871184	*	N	Solyc01g017460	PROM_Solyc01g017470
23871184	Cluster_1175	SL3.0ch01	nc_RNA	23870785	23871184	*	N	Solyc01g017460	PROM_Solyc01g017450
23871184	Cluster_1175	SL3.0ch01	nc_RNA	23870785	23871184	*	N	Solyc01g017460	PROM_Solyc01g017470
23872808	Cluster_1176	SL3.0ch01	nc_RNA	23872578	23872808	-	N		PROM_Solyc01g017480	HostGene	ms424054_SL3.0ch01_PotentialHostGene_SL3_120k-B-R7815-Map13
23874128	Cluster_1177	SL3.0ch01	nc_RNA	23873235	23874128	-	N		PROM_Solyc01g017480
23874968	Cluster_1178	SL3.0ch01	nc_RNA	23874225	23874968	-	N			Unclassified	ms162009_SL3.0ch01_noCat_SL3_120k-B-R2595-Map11
23874968	Cluster_1178	SL3.0ch01	nc_RNA	23874225	23874968	-	N			Unclassified	ms293304_SL3.0ch01_noCat_SL3_120k-B-R2271-Map7
23875311	Cluster_1179	SL3.0ch01	nc_RNA	23875054	23875311	-	N		PROM_Solyc01g017490	Unclassified	ms293346_SL3.0ch01_noCat_SL3_120k-B-R703-Map5
23876720	Cluster_1180	SL3.0ch01	nc_RNA	23875393	23876720	-	N		PROM_Solyc01g017500
23877882	Cluster_1181	SL3.0ch01	nc_RNA	23876811	23877882	-	N
23879014	Cluster_1182	SL3.0ch01	nc_RNA	23878498	23879014	-	N	Solyc01g017485
23879014	Cluster_1182	SL3.0ch01	nc_RNA	23878498	23879014	-	N	Solyc01g017485
23879820	Cluster_1183	SL3.0ch01	nc_RNA	23879085	23879820	-	N	Solyc01g017500	PROM_Solyc01g017510
23880333	Cluster_1184	SL3.0ch01	nc_RNA	23879906	23880333	-	N		PROM_Solyc01g017510
23883720	Cluster_1185	SL3.0ch01	nc_RNA	23882863	23883720	*	N
23884536	Cluster_1186	SL3.0ch01	nc_RNA	23883857	23884536	*	21
24043740	Cluster_1187	SL3.0ch01	nc_RNA	24043555	24043740	-	24				ms293346_SL3.0ch01_noCat_SL3_120k-B-R703-Map5-exon2
24055116	Cluster_1188	SL3.0ch01	nc_RNA	24054291	24055116	*	24			Confused_TE_withPotentialHostGeneDomain	ms555621_SL3.0ch01_RXX_SL3_120k-B-R2153-Map8
24200501	Cluster_1189	SL3.0ch01	nc_RNA	24200471	24200501	+	N
24245588	Cluster_1190	SL3.0ch01	nc_RNA	24245215	24245588	*	24			EPRV	ms294413_SL3.0ch01_RLX-incomp_SL3_120k-B-R2839-Map20_reversed
24246982	Cluster_1191	SL3.0ch01	nc_RNA	24246820	24246982	*	24
24386443	Cluster_1192	SL3.0ch01	nc_RNA	24386250	24386443	-	N
24540451	Cluster_1193	SL3.0ch01	nc_RNA	24539683	24540451	*	24			Confused_TE	ms294771_SL3.0ch01_DTX-incomp-chim_SL3_120k-B-R6827-Map14_reversed
24752994	Cluster_1194	SL3.0ch01	nc_RNA	24751995	24752994	*	24
24789764	Cluster_1195	SL3.0ch01	nc_RNA	24788934	24789764	+	24
24832719	Cluster_1196	SL3.0ch01	nc_RNA	24832416	24832719	*	23			Unclassified	ms163797_SL3.0ch01_noCat_SL3_120k-B-G462-Map10
25042077	Cluster_1197	SL3.0ch01	nc_RNA	25041664	25042077	*	N			Confused_TE_withPotentialHostGeneDomain	ms163822_SL3.0ch01_RXX_SL3_120k-B-R2153-Map8
25136156	Cluster_1198	SL3.0ch01	nc_RNA	25135398	25136156	+	24			Gypsy	ms163879_SL3.0ch01_RLX-incomp-chim_SL3_120k-B-R702-Map10
25136156	Cluster_1198	SL3.0ch01	nc_RNA	25135398	25136156	+	24			PutativeNoutoClassII	ms557681_SL3.0ch01_DXX_SL3_120k-B-R2407-Map6
25270730	Cluster_1199	SL3.0ch01	nc_RNA	25270546	25270730	+	24			SAT	ms557688_SL3.0ch01_RXX-TRIM_SL3_120k-B-R725-Map6
25353498	Cluster_1200	SL3.0ch01	nc_RNA	25353092	25353498	+	24			Gypsy	ms165208_SL3.0ch01_RLX-incomp_SL3_120k-B-R7-Map20_reversed
25353498	Cluster_1200	SL3.0ch01	nc_RNA	25353092	25353498	+	24			Gypsy	ms558485_SL3.0ch01_RLX-incomp-chim_SL3_120k-B-R702-Map10
25725357	Cluster_1201	SL3.0ch01	nc_RNA	25724321	25725357	*	24
25783561	Cluster_1202	SL3.0ch01	nc_RNA	25782674	25783561	*	24
25875060	Cluster_1203	SL3.0ch01	nc_RNA	25874923	25875060	*	N			MuDR	ms355277_SL3.0ch01_DTX-incomp_SL3_120k-B-R1738-Map15_reversed
26085608	Cluster_1204	SL3.0ch01	nc_RNA	26085461	26085608	+	24
26407690	Cluster_1205	SL3.0ch01	nc_RNA	26407651	26407690	-	21			Gypsy	ms165655_SL3.0ch01_RLX-incomp_SL3_120k-B-G244-Map20
27815602	Cluster_1206	SL3.0ch01	nc_RNA	27815413	27815602	-	24
27876578	Cluster_1207	SL3.0ch01	nc_RNA	27876426	27876578	+	24			Gypsy	ms165655_SL3.0ch01_RLX-incomp_SL3_120k-B-G244-Map20
27876578	Cluster_1207	SL3.0ch01	nc_RNA	27876426	27876578	+	24			Copia	ms115023_SL3.0ch01_RLX-incomp-chim_SL3_120k-B-G1894-Map5_reversed
27878828	Cluster_1208	SL3.0ch01	nc_RNA	27878212	27878828	*	24		PROM_Solyc01g020240	Copia	ms115023_SL3.0ch01_RLX-incomp-chim_SL3_120k-B-G1894-Map5_reversed
27890125	Cluster_1209	SL3.0ch01	nc_RNA	27889522	27890125	*	24
27890622	Cluster_1210	SL3.0ch01	nc_RNA	27890405	27890622	*	24
27909178	Cluster_1211	SL3.0ch01	nc_RNA	27908828	27909178	*	24			Unclassified	ms165927_SL3.0ch01_noCat_SL3_120k-B-G308-Map20
28224067	Cluster_1212	SL3.0ch01	nc_RNA	28223934	28224067	-	24			Unclassified	ms49116_SL3.0ch01_noCat_SL3_120k-B-R2595-Map11
28224067	Cluster_1212	SL3.0ch01	nc_RNA	28223934	28224067	-	24			Unclassified	ms165947_SL3.0ch01_noCat_SL3_120k-B-R2455-Map6
28519470	Cluster_1213	SL3.0ch01	nc_RNA	28518461	28519470	*	24
28555170	Cluster_1214	SL3.0ch01	nc_RNA	28554908	28555170	-	N	Solyc01g020285		TIR_MITEov10	ms35475_SL3.0ch01_DXX-MITE_SL3_120k-B-G372-Map9
29240680	Cluster_1215	SL3.0ch01	nc_RNA	29240251	29240680	*	24			Unclassified	ms115162_SL3.0ch01_noCat_SL3_120k-B-R2137-Map8
29550721	Cluster_1216	SL3.0ch01	nc_RNA	29550451	29550721	+	22	Solyc01g020376		Unclassified	ms559913_SL3.0ch01_noCat_SL3_120k-B-G308-Map20
29550843	Cluster_1217	SL3.0ch01	nc_RNA	29550801	29550843	+	21	Solyc01g020376		PutativeNoutoClassII	ms115167_SL3.0ch01_DXX_SL3_120k-B-R2407-Map6
30385842	Cluster_1218	SL3.0ch01	nc_RNA	30385701	30385842	*	N
30389923	Cluster_1219	SL3.0ch01	nc_RNA	30389636	30389923	*	24			TIR_MITEov10	ms120700_SL3.0ch01_DXX-MITE_SL3_120k-B-G372-Map9
30504510	Cluster_1220	SL3.0ch01	nc_RNA	30503793	30504510	*	24			Unclassified	ms167781_SL3.0ch01_noCat_SL3_120k-B-R2595-Map11
30595203	Cluster_1221	SL3.0ch01	nc_RNA	30594885	30595203	-	24			TIR_MITEov10	ms167795_SL3.0ch01_DXX-MITE_SL3_120k-B-R3744-Map5
30595203	Cluster_1221	SL3.0ch01	nc_RNA	30594885	30595203	-	24			Copia	ms167785_SL3.0ch01_RLX-incomp_SL3_120k-B-R29-Map20
30832533	Cluster_1222	SL3.0ch01	nc_RNA	30832260	30832533	+	N	Solyc01g020460	PROM_Solyc01g020450
30836794	Cluster_1223	SL3.0ch01	nc_RNA	30836650	30836794	+	N		PROM_Solyc01g020460
30837701	Cluster_1224	SL3.0ch01	nc_RNA	30837558	30837701	+	N
30937988	Cluster_1225	SL3.0ch01	nc_RNA	30937593	30937988	*	24
31473907	Cluster_1226	SL3.0ch01	nc_RNA	31473741	31473907	*	N			SAT	ms553467_SL3.0ch01_RXX-TRIM_SL3_120k-B-R725-Map6
31801710	Cluster_1227	SL3.0ch01	nc_RNA	31800872	31801710	*	24
31814855	Cluster_1228	SL3.0ch01	nc_RNA	31814650	31814855	+	24
31928876	Cluster_1229	SL3.0ch01	nc_RNA	31928681	31928876	*	24
32026230	Cluster_1230	SL3.0ch01	nc_RNA	32025506	32026230	*	24			put_hAT	ms223841_SL3.0ch01_DTX-comp_SL3_120k-B-P509.143-Map7_reversed
32039076	Cluster_1231	SL3.0ch01	nc_RNA	32038331	32039076	*	24
32386493	Cluster_1232	SL3.0ch01	nc_RNA	32385984	32386493	+	N	Solyc01g021640
32411690	Cluster_1233	SL3.0ch01	nc_RNA	32411189	32411690	*	24
32434141	Cluster_1234	SL3.0ch01	nc_RNA	32433607	32434141	+	N
32444365	Cluster_1235	SL3.0ch01	nc_RNA	32443518	32444365	+	24	Solyc01g021675
32446436	Cluster_1236	SL3.0ch01	nc_RNA	32446130	32446436	+	N
32624772	Cluster_1237	SL3.0ch01	nc_RNA	32624622	32624772	+	N			Unclassified	ms115513_SL3.0ch01_noCat_SL3_120k-B-G1527-Map5
32624772	Cluster_1237	SL3.0ch01	nc_RNA	32624622	32624772	+	N			HostGene	ms115505_SL3.0ch01_noCat_SL3_120k-B-R3049-Map6
32664176	Cluster_1238	SL3.0ch01	nc_RNA	32663754	32664176	-	24
32668037	Cluster_1239	SL3.0ch01	nc_RNA	32667506	32668037	*	N
32671537	Cluster_1240	SL3.0ch01	nc_RNA	32671282	32671537	*	24		PROM_Solyc01g021730	HostGene	ms115561_SL3.0ch01_PotentialHostGene_SL3_120k-B-R7815-Map13
32706720	Cluster_1241	SL3.0ch01	nc_RNA	32706237	32706720	*	24
32707456	Cluster_1242	SL3.0ch01	nc_RNA	32707130	32707456	+	24
32710940	Cluster_1243	SL3.0ch01	nc_RNA	32710562	32710940	*	N
32713697	Cluster_1244	SL3.0ch01	nc_RNA	32713173	32713697	*	24
32729860	Cluster_1245	SL3.0ch01	nc_RNA	32729836	32729860	+	N
32791099	Cluster_1246	SL3.0ch01	nc_RNA	32790663	32791099	*	24
32837889	Cluster_1247	SL3.0ch01	nc_RNA	32837337	32837889	*	24
32840229	Cluster_1248	SL3.0ch01	nc_RNA	32839724	32840229	-	N	Solyc01g022750
32847437	Cluster_1249	SL3.0ch01	nc_RNA	32847094	32847437	-	N	Solyc01g022760	PROM_Solyc01g022750
32847730	Cluster_1250	SL3.0ch01	nc_RNA	32847553	32847730	-	N	Solyc01g022760	PROM_Solyc01g022750
32848002	Cluster_1251	SL3.0ch01	nc_RNA	32847901	32848002	-	N		PROM_Solyc01g022750
32848002	Cluster_1251	SL3.0ch01	nc_RNA	32847901	32848002	-	N		PROM_Solyc01g022760
32848392	Cluster_1252	SL3.0ch01	nc_RNA	32848238	32848392	-	N		PROM_Solyc01g022760
32848722	Cluster_1253	SL3.0ch01	nc_RNA	32848602	32848722	-	N		PROM_Solyc01g022760
32849751	Cluster_1254	SL3.0ch01	nc_RNA	32849624	32849751	-	N		PROM_Solyc01g022760
32850036	Cluster_1255	SL3.0ch01	nc_RNA	32849976	32850036	-	N
32850772	Cluster_1256	SL3.0ch01	nc_RNA	32850664	32850772	*	N
32851111	Cluster_1257	SL3.0ch01	nc_RNA	32850977	32851111	-	N
32851727	Cluster_1258	SL3.0ch01	nc_RNA	32851630	32851727	-	N
32852226	Cluster_1259	SL3.0ch01	nc_RNA	32851981	32852226	-	N
32852435	Cluster_1260	SL3.0ch01	nc_RNA	32852308	32852435	-	N
32853129	Cluster_1261	SL3.0ch01	nc_RNA	32853009	32853129	-	N
32854266	Cluster_1262	SL3.0ch01	nc_RNA	32854066	32854266	-	N
32854883	Cluster_1263	SL3.0ch01	nc_RNA	32854422	32854883	-	N
32855672	Cluster_1264	SL3.0ch01	nc_RNA	32855456	32855672	-	N
32856417	Cluster_1265	SL3.0ch01	nc_RNA	32856161	32856417	-	N
32857424	Cluster_1266	SL3.0ch01	nc_RNA	32856853	32857424	*	N
32857721	Cluster_1267	SL3.0ch01	nc_RNA	32857546	32857721	*	N
32857987	Cluster_1268	SL3.0ch01	nc_RNA	32857883	32857987	-	N
32867236	Cluster_1269	SL3.0ch01	nc_RNA	32866968	32867236	-	N		PROM_Solyc01g022780
32868340	Cluster_1270	SL3.0ch01	nc_RNA	32867376	32868340	-	N
32868572	Cluster_1271	SL3.0ch01	nc_RNA	32868448	32868572	-	N	Solyc01g022780
32868971	Cluster_1272	SL3.0ch01	nc_RNA	32868764	32868971	-	N
32888263	Cluster_1273	SL3.0ch01	nc_RNA	32887956	32888263	-	N
35379896	Cluster_1274	SL3.0ch01	nc_RNA	35379561	35379896	+	24		PROM_Solyc01g034020	TIR_MITEov10	ms115586_SL3.0ch01_DTX-incomp_SL3_120k-B-G1236-Map8
35870847	Cluster_1275	SL3.0ch01	nc_RNA	35870631	35870847	*	24
35871658	Cluster_1276	SL3.0ch01	nc_RNA	35871426	35871658	+	24
36178192	Cluster_1277	SL3.0ch01	nc_RNA	36177973	36178192	+	24			Unclassified	ms508828_SL3.0ch01_noCat_SL3_120k-B-R2399-Map5
36274186	Cluster_1278	SL3.0ch01	nc_RNA	36274012	36274186	+	24
36291329	Cluster_1279	SL3.0ch01	nc_RNA	36290632	36291329	*	24	Solyc01g034155
36507978	Cluster_1280	SL3.0ch01	nc_RNA	36507179	36507978	*	24			Unclassified	ms169498_SL3.0ch01_noCat_SL3_120k-B-G308-Map20
36507978	Cluster_1280	SL3.0ch01	nc_RNA	36507179	36507978	*	24			Unclassified	ms169553_SL3.0ch01_noCat_SL3_120k-B-R2455-Map6
37077225	Cluster_1281	SL3.0ch01	nc_RNA	37076854	37077225	-	22			Unclassified	ms169563_SL3.0ch01_noCat_SL3_120k-B-R3245-Map14
37079320	Cluster_1282	SL3.0ch01	nc_RNA	37078845	37079320	*	22			Gypsy	ms169605_SL3.0ch01_RLX-incomp-chim_SL3_120k-B-R702-Map10
39350068	Cluster_1283	SL3.0ch01	nc_RNA	39349785	39350068	*	23
40060367	Cluster_1284	SL3.0ch01	nc_RNA	40060100	40060367	*	22			Confused_TE	ms300725_SL3.0ch01_RLX-incomp-chim_SL3_120k-B-R7766-Map11_reversed
40393294	Cluster_1285	SL3.0ch01	nc_RNA	40393155	40393294	+	24			PutativeNoutoClassII	ms300730_SL3.0ch01_DXX_SL3_120k-B-G359-Map20_reversed
40988023	Cluster_1286	SL3.0ch01	nc_RNA	40987628	40988023	*	24			Gypsy	ms300731_SL3.0ch01_RLX-incomp-chim_SL3_120k-B-G99-Map20
40989474	Cluster_1287	SL3.0ch01	nc_RNA	40988561	40989474	*	24
40993897	Cluster_1288	SL3.0ch01	nc_RNA	40992558	40993897	+	N	Solyc01g028860
40995530	Cluster_1289	SL3.0ch01	nc_RNA	40994026	40995530	+	N	Solyc01g028860
41068021	Cluster_1290	SL3.0ch01	nc_RNA	41067602	41068021	*	24			HostGene	ms38772_SL3.0ch01_PotentialHostGene_SL3_120k-B-R6211-Map5
41068021	Cluster_1290	SL3.0ch01	nc_RNA	41067602	41068021	*	24			HostGene	ms38772_SL3.0ch01_PotentialHostGene_SL3_120k-B-R6211-Map5
41072819	Cluster_1291	SL3.0ch01	nc_RNA	41072135	41072819	*	23
41227185	Cluster_1292	SL3.0ch01	nc_RNA	41226451	41227185	*	22			MuDR	ms114925_SL3.0ch01_DTX-incomp_SL3_120k-B-G1991-Map5
41230885	Cluster_1293	SL3.0ch01	nc_RNA	41230531	41230885	+	22			Unclassified	ms169986_SL3.0ch01_noCat_SL3_120k-B-R242-Map5
41288862	Cluster_1294	SL3.0ch01	nc_RNA	41288357	41288862	+	N	Solyc01g028810
41289152	Cluster_1295	SL3.0ch01	nc_RNA	41289015	41289152	+	N	Solyc01g028810
41290108	Cluster_1296	SL3.0ch01	nc_RNA	41289525	41290108	+	N	Solyc01g028810
41290535	Cluster_1297	SL3.0ch01	nc_RNA	41290203	41290535	+	N	Solyc01g028810
41290912	Cluster_1298	SL3.0ch01	nc_RNA	41290620	41290912	+	N	Solyc01g028810
41292776	Cluster_1299	SL3.0ch01	nc_RNA	41292019	41292776	+	N	Solyc01g028810
41294682	Cluster_1300	SL3.0ch01	nc_RNA	41293659	41294682	*	24			HostGene	ms170052_SL3.0ch01_PotentialHostGene_SL3_120k-B-R7815-Map13
41396013	Cluster_1301	SL3.0ch01	nc_RNA	41395690	41396013	*	24
42270315	Cluster_1302	SL3.0ch01	nc_RNA	42270114	42270315	*	N
42415476	Cluster_1303	SL3.0ch01	nc_RNA	42414791	42415476	*	24	Solyc01g028805
42417087	Cluster_1304	SL3.0ch01	nc_RNA	42416929	42417087	-	24
42434739	Cluster_1305	SL3.0ch01	nc_RNA	42433626	42434739	*	N
42436969	Cluster_1306	SL3.0ch01	nc_RNA	42434822	42436969	+	N
42438326	Cluster_1307	SL3.0ch01	nc_RNA	42437324	42438326	+	N
42941964	Cluster_1308	SL3.0ch01	nc_RNA	42941743	42941964	-	N			Unclassified	ms433084_SL3.0ch01_noCat_SL3_120k-B-G308-Map20
43022092	Cluster_1309	SL3.0ch01	nc_RNA	43021892	43022092	*	N			TIR_MITEov10	ms433088_SL3.0ch01_DTX-incomp_SL3_120k-B-G1236-Map8
43022092	Cluster_1309	SL3.0ch01	nc_RNA	43021892	43022092	*	N			Copia	ms433121_SL3.0ch01_RLX-incomp_SL3_120k-B-R448-Map20
43036171	Cluster_1310	SL3.0ch01	nc_RNA	43035795	43036171	*	22			Copia	ms433123_SL3.0ch01_RLX-incomp_SL3_120k-B-R448-Map20
43036171	Cluster_1310	SL3.0ch01	nc_RNA	43035795	43036171	*	22				ms433121_SL3.0ch01_RLX-incomp_SL3_120k-B-R448-Map20-exon1
43160131	Cluster_1311	SL3.0ch01	nc_RNA	43159767	43160131	*	24	Solyc01g044350
43197649	Cluster_1312	SL3.0ch01	nc_RNA	43196318	43197649	+	N	Solyc01g044360
43208265	Cluster_1313	SL3.0ch01	nc_RNA	43207367	43208265	+	N
43830132	Cluster_1314	SL3.0ch01	nc_RNA	43829824	43830132	-	24		PROM_Solyc01g044420	PutativeNoutoClassII	ms113743_SL3.0ch01_DXX_SL3_120k-B-G359-Map20_reversed
44232082	Cluster_1315	SL3.0ch01	nc_RNA	44231819	44232082	-	24
44234324	Cluster_1316	SL3.0ch01	nc_RNA	44233409	44234324	*	24				ms113743_SL3.0ch01_DXX_SL3_120k-B-G359-Map20_reversed-exon2
44577982	Cluster_1317	SL3.0ch01	nc_RNA	44577855	44577982	+	24			Unclassified	ms434017_SL3.0ch01_noCat_SL3_120k-B-R3197-Map5
44913045	Cluster_1318	SL3.0ch01	nc_RNA	44912753	44913045	+	N	Solyc01g047597
45565023	Cluster_1319	SL3.0ch01	nc_RNA	45564734	45565023	-	N	Solyc01g049650
45791081	Cluster_1320	SL3.0ch01	nc_RNA	45789826	45791081	*	24	Solyc01g049685		EPRV	ms172029_SL3.0ch01_RLX-incomp_SL3_120k-B-G2031-Map7
46129895	Cluster_1321	SL3.0ch01	nc_RNA	46129694	46129895	-	N			LINE	ms172085_SL3.0ch01_RIX-incomp_SL3_120k-B-R3614-Map6
46576297	Cluster_1322	SL3.0ch01	nc_RNA	46576148	46576297	*	24		PROM_Solyc01g049840	LINE	ms172085_SL3.0ch01_RIX-incomp_SL3_120k-B-R3614-Map6
46585686	Cluster_1323	SL3.0ch01	nc_RNA	46585518	46585686	*	24
46637200	Cluster_1324	SL3.0ch01	nc_RNA	46636539	46637200	*	N
46642547	Cluster_1325	SL3.0ch01	nc_RNA	46642184	46642547	*	24		PROM_Solyc01g049880
46651672	Cluster_1326	SL3.0ch01	nc_RNA	46651471	46651672	-	24			Unclassified	ms172140_SL3.0ch01_noCat_SL3_120k-B-R7820-Map8
46652229	Cluster_1327	SL3.0ch01	nc_RNA	46651807	46652229	*	24			Copia	ms116077_SL3.0ch01_RIX-incomp-chim_SL3_120k-B-P50.56-Map20
46749531	Cluster_1328	SL3.0ch01	nc_RNA	46749041	46749531	*	24			PutativeNoutoClassII	ms179869_SL3.0ch01_DXX-MITE_SL3_120k-B-P404.225-Map14_reversed
46751028	Cluster_1329	SL3.0ch01	nc_RNA	46750572	46751028	-	N	Solyc01g049890
47091436	Cluster_1330	SL3.0ch01	nc_RNA	47091146	47091436	*	21
47270141	Cluster_1331	SL3.0ch01	nc_RNA	47269871	47270141	*	24			Unclassified	ms116101_SL3.0ch01_noCat_SL3_120k-B-R2470-Map11
47615981	Cluster_1332	SL3.0ch01	nc_RNA	47615273	47615981	*	24	Solyc01g049960
47691604	Cluster_1333	SL3.0ch01	nc_RNA	47690972	47691604	*	24		PROM_Solyc01g049975
47954309	Cluster_1334	SL3.0ch01	nc_RNA	47954145	47954309	*	N			Unclassified	ms116101_SL3.0ch01_noCat_SL3_120k-B-R2470-Map11
48393821	Cluster_1335	SL3.0ch01	nc_RNA	48392622	48393821	*	24			HostGene	ms116175_SL3.0ch01_noCat_SL3_120k-B-R2100-Map5
50890181	Cluster_1336	SL3.0ch01	nc_RNA	50890162	50890181	+	N			Unclassified	ms446576_SL3.0ch01_noCat_SL3_120k-B-G308-Map20
50890181	Cluster_1336	SL3.0ch01	nc_RNA	50890162	50890181	+	N			Confused_TE	ms116182_SL3.0ch01_DXX-MITE_SL3_120k-B-R2337-Map12
52757884	Cluster_1337	SL3.0ch01	nc_RNA	52756910	52757884	*	24
53336439	Cluster_1338	SL3.0ch01	nc_RNA	53336374	53336439	+	21
53345360	Cluster_1339	SL3.0ch01	nc_RNA	53344730	53345360	*	24			Gypsy	ms116212_SL3.0ch01_RLX-incomp_SL3_120k-B-R444-Map10
53384840	Cluster_1340	SL3.0ch01	nc_RNA	53384623	53384840	*	21			Gypsy	ms116212_SL3.0ch01_RLX-incomp_SL3_120k-B-R444-Map10
53600939	Cluster_1341	SL3.0ch01	nc_RNA	53599452	53600939	*	24	Solyc01g056340			ms116212_SL3.0ch01_RLX-incomp_SL3_120k-B-R444-Map10-exon1
53871252	Cluster_1342	SL3.0ch01	nc_RNA	53871083	53871252	+	N	Solyc01g056370
54289913	Cluster_1343	SL3.0ch01	nc_RNA	54289512	54289913	*	N
54330745	Cluster_1344	SL3.0ch01	nc_RNA	54330640	54330745	-	N
54387263	Cluster_1345	SL3.0ch01	nc_RNA	54386603	54387263	*	22			TIR_MITEov10	ms435181_SL3.0ch01_DTX-incomp_SL3_120k-B-R2955-Map6
54388500	Cluster_1346	SL3.0ch01	nc_RNA	54387550	54388500	*	22
54391523	Cluster_1347	SL3.0ch01	nc_RNA	54389102	54391523	*	22			Gypsy	ms304624_SL3.0ch01_RLX-incomp_SL3_120k-B-R8423-Map5
54392762	Cluster_1348	SL3.0ch01	nc_RNA	54391618	54392762	*	22			SAT	ms173883_SL3.0ch01_RXX-TRIM_SL3_120k-B-R725-Map6
54393563	Cluster_1349	SL3.0ch01	nc_RNA	54393069	54393563	-	22			HostGene	ms568081_SL3.0ch01_PotentialHostGene_SL3_120k-B-R7815-Map13
54529306	Cluster_1350	SL3.0ch01	nc_RNA	54529145	54529306	+	N			TIR_MITEov10	ms553457_SL3.0ch01_RIX-incomp-chim_SL3_120k-B-P34.434-Map7
54701566	Cluster_1351	SL3.0ch01	nc_RNA	54700945	54701566	*	21	Solyc01g056570
54707157	Cluster_1352	SL3.0ch01	nc_RNA	54707027	54707157	-	24	Solyc01g056570
54882385	Cluster_1353	SL3.0ch01	nc_RNA	54882105	54882385	*	24
54883078	Cluster_1354	SL3.0ch01	nc_RNA	54882645	54883078	*	24
54888379	Cluster_1355	SL3.0ch01	nc_RNA	54888304	54888379	*	N	Solyc01g056580
55572073	Cluster_1356	SL3.0ch01	nc_RNA	55571587	55572073	*	N
56241634	Cluster_1357	SL3.0ch01	nc_RNA	56241372	56241634	+	N			put_hAT	ms553458_SL3.0ch01_DTX-comp_SL3_120k-B-P509.143-Map7_reversed
56273210	Cluster_1358	SL3.0ch01	nc_RNA	56272406	56273210	*	24			Unclassified	ms175179_SL3.0ch01_noCat_SL3_120k-B-R3086-Map6
56439166	Cluster_1359	SL3.0ch01	nc_RNA	56437958	56439166	+	24		PROM_Solyc01g056730
56451734	Cluster_1360	SL3.0ch01	nc_RNA	56451056	56451734	*	22	Solyc01g056730		PutativeNoutoClassII	ms44131_SL3.0ch01_DXX_SL3_120k-B-R120-Map20
56451734	Cluster_1360	SL3.0ch01	nc_RNA	56451056	56451734	*	22	Solyc01g056730			ms175179_SL3.0ch01_noCat_SL3_120k-B-R3086-Map6-exon3
56452720	Cluster_1361	SL3.0ch01	nc_RNA	56451823	56452720	*	22	Solyc01g056730		Gypsy	ms568679_SL3.0ch01_RLX-incomp_SL3_120k-B-R35-Map14
56452720	Cluster_1361	SL3.0ch01	nc_RNA	56451823	56452720	*	22	Solyc01g056730			ms568672_SL3.0ch01_RLX-incomp_SL3_120k-B-G2080-Map10_reversed-exon2
56452720	Cluster_1361	SL3.0ch01	nc_RNA	56451823	56452720	*	22	Solyc01g056730		Gypsy	ms568672_SL3.0ch01_RLX-incomp_SL3_120k-B-G2080-Map10_reversed
56534893	Cluster_1362	SL3.0ch01	nc_RNA	56534739	56534893	+	N		PROM_Solyc01g056780	Unclassified	ms313266_SL3.0ch01_noCat_SL3_120k-B-R2455-Map6
56538728	Cluster_1363	SL3.0ch01	nc_RNA	56538475	56538728	*	24		PROM_Solyc01g056790	Copia	ms44906_SL3.0ch01_RLX-incomp-chim_SL3_120k-B-P355.254-Map7_reversed
56763649	Cluster_1364	SL3.0ch01	nc_RNA	56763342	56763649	*	24		PROM_Solyc01g056830
56763649	Cluster_1364	SL3.0ch01	nc_RNA	56763342	56763649	*	24		PROM_Solyc01g056810
56921535	Cluster_1365	SL3.0ch01	nc_RNA	56921186	56921535	*	24			Unclassified	ms307238_SL3.0ch01_noCat_SL3_120k-B-R242-Map5
56921535	Cluster_1365	SL3.0ch01	nc_RNA	56921186	56921535	*	24			Helitron	ms215360_SL3.0ch01_DHX-incomp-chim_SL3_120k-B-R6210-Map5
56989605	Cluster_1366	SL3.0ch01	nc_RNA	56988936	56989605	*	24
57175931	Cluster_1367	SL3.0ch01	nc_RNA	57175441	57175931	*	24
57346802	Cluster_1368	SL3.0ch01	nc_RNA	57346613	57346802	*	N		PROM_Solyc01g056870
57364290	Cluster_1369	SL3.0ch01	nc_RNA	57364074	57364290	-	24
57368643	Cluster_1370	SL3.0ch01	nc_RNA	57368347	57368643	+	24
57464717	Cluster_1371	SL3.0ch01	nc_RNA	57464522	57464717	-	N				ms307862_SL3.0ch01_DTX-incomp_SL3_120k-B-G1812-Map20_reversed-exon3
57464717	Cluster_1371	SL3.0ch01	nc_RNA	57464522	57464717	-	N			hAT	ms307862_SL3.0ch01_DTX-incomp_SL3_120k-B-G1812-Map20_reversed
57597239	Cluster_1372	SL3.0ch01	nc_RNA	57596588	57597239	+	N	Solyc01g056940
57683096	Cluster_1373	SL3.0ch01	nc_RNA	57682529	57683096	*	24
57891383	Cluster_1374	SL3.0ch01	nc_RNA	57890590	57891383	+	N	Solyc01g057000
57892415	Cluster_1375	SL3.0ch01	nc_RNA	57891651	57892415	+	N	Solyc01g057000
57897194	Cluster_1376	SL3.0ch01	nc_RNA	57897051	57897194	*	24
57905254	Cluster_1377	SL3.0ch01	nc_RNA	57904413	57905254	*	24			Confused_TE_withPotentialHostGeneDomain	ms307876_SL3.0ch01_RXX_SL3_120k-B-R2153-Map8
57907293	Cluster_1378	SL3.0ch01	nc_RNA	57906775	57907293	-	24
57920766	Cluster_1379	SL3.0ch01	nc_RNA	57920502	57920766	*	24
57957224	Cluster_1380	SL3.0ch01	nc_RNA	57956987	57957224	*	N
58197302	Cluster_1381	SL3.0ch01	nc_RNA	58196884	58197302	-	N
58282428	Cluster_1382	SL3.0ch01	nc_RNA	58281986	58282428	+	24
58285089	Cluster_1383	SL3.0ch01	nc_RNA	58284737	58285089	*	24		PROM_Solyc01g057080
58289338	Cluster_1384	SL3.0ch01	nc_RNA	58288504	58289338	*	24
58338446	Cluster_1385	SL3.0ch01	nc_RNA	58338202	58338446	*	24			hAT	ms307878_SL3.0ch01_DTX-incomp_SL3_120k-B-R2321-Map8
59032994	Cluster_1386	SL3.0ch01	nc_RNA	59032476	59032994	*	24
59149040	Cluster_1387	SL3.0ch01	nc_RNA	59147980	59149040	*	24
59400794	Cluster_1388	SL3.0ch01	nc_RNA	59400308	59400794	*	24			Unclassified	ms307884_SL3.0ch01_noCat_SL3_120k-B-G1454-Map8
59502227	Cluster_1389	SL3.0ch01	nc_RNA	59502001	59502227	-	N
59529966	Cluster_1390	SL3.0ch01	nc_RNA	59529513	59529966	*	24			Unclassified	ms307911_SL3.0ch01_noCat_SL3_120k-B-P4.84-Map20
59616135	Cluster_1391	SL3.0ch01	nc_RNA	59616003	59616135	-	N
59692633	Cluster_1392	SL3.0ch01	nc_RNA	59692207	59692633	+	24
59699465	Cluster_1393	SL3.0ch01	nc_RNA	59698519	59699465	*	24
59735284	Cluster_1394	SL3.0ch01	nc_RNA	59734922	59735284	*	24
59762057	Cluster_1395	SL3.0ch01	nc_RNA	59761871	59762057	*	22				ms219762_SL3.0ch01_RLX-incomp_SL3_120k-B-R4133-Map11_reversed-exon1
59762057	Cluster_1395	SL3.0ch01	nc_RNA	59761871	59762057	*	22			Gypsy_withPotentialHostGeneDomain	ms219762_SL3.0ch01_RLX-incomp_SL3_120k-B-R4133-Map11_reversed
60176283	Cluster_1396	SL3.0ch01	nc_RNA	60176224	60176283	+	N
60242552	Cluster_1397	SL3.0ch01	nc_RNA	60242256	60242552	*	24			Gypsy	ms219763_SL3.0ch01_RLX-incomp-chim_SL3_120k-B-R4192-Map10
60257467	Cluster_1398	SL3.0ch01	nc_RNA	60257247	60257467	+	24			Confused_TE_withPotentialHostGeneDomain	ms116976_SL3.0ch01_RLX-incomp_SL3_120k-B-R7791-Map20
60257467	Cluster_1398	SL3.0ch01	nc_RNA	60257247	60257467	+	24			put_hAT	ms570650_SL3.0ch01_DTX-incomp_SL3_120k-B-R325-Map20
60268319	Cluster_1399	SL3.0ch01	nc_RNA	60267616	60268319	*	24
60271375	Cluster_1400	SL3.0ch01	nc_RNA	60270474	60271375	*	24
60490066	Cluster_1401	SL3.0ch01	nc_RNA	60489737	60490066	*	24
60519174	Cluster_1402	SL3.0ch01	nc_RNA	60518866	60519174	*	24			Confused_TE	ms571132_SL3.0ch01_RLX-incomp-chim_SL3_120k-B-R620-Map17_reversed
60519174	Cluster_1402	SL3.0ch01	nc_RNA	60518866	60519174	*	24			Copia	ms439892_SL3.0ch01_RLX-incomp_SL3_120k-B-G283-Map20
60522054	Cluster_1403	SL3.0ch01	nc_RNA	60521924	60522054	*	24			Unclassified	ms117043_SL3.0ch01_noCat_SL3_120k-B-P71.46-Map20
60522054	Cluster_1403	SL3.0ch01	nc_RNA	60521924	60522054	*	24			Gypsy	ms571135_SL3.0ch01_RLX-incomp-chim_SL3_120k-B-R702-Map10
60523189	Cluster_1404	SL3.0ch01	nc_RNA	60523050	60523189	-	24
60773498	Cluster_1405	SL3.0ch01	nc_RNA	60773012	60773498	*	24
60918732	Cluster_1406	SL3.0ch01	nc_RNA	60918141	60918732	*	24		PROM_Solyc01g057440
61016845	Cluster_1407	SL3.0ch01	nc_RNA	61016489	61016845	*	24	Solyc01g057465		Copia	ms309058_SL3.0ch01_RLX-incomp_SL3_120k-B-G355-Map6_reversed
61021405	Cluster_1408	SL3.0ch01	nc_RNA	61020803	61021405	*	24			Unclassified	ms309068_SL3.0ch01_noCat_SL3_120k-B-P325.152-Map6
61044735	Cluster_1409	SL3.0ch01	nc_RNA	61044051	61044735	*	24
61053912	Cluster_1410	SL3.0ch01	nc_RNA	61053520	61053912	-	24		PROM_Solyc01g057490
61131034	Cluster_1411	SL3.0ch01	nc_RNA	61130831	61131034	-	N
61233349	Cluster_1412	SL3.0ch01	nc_RNA	61233282	61233349	*	24				ms309068_SL3.0ch01_noCat_SL3_120k-B-P325.152-Map6-exon2
61820944	Cluster_1413	SL3.0ch01	nc_RNA	61820869	61820944	*	22			TIR_MITEov10	ms309076_SL3.0ch01_DXX-MITE_SL3_120k-B-P84.407-Map15
61880602	Cluster_1414	SL3.0ch01	nc_RNA	61880193	61880602	-	24	Solyc01g057570		Confused_TE_withPotentialHostGeneDomain	ms309094_SL3.0ch01_RXX_SL3_120k-B-R2153-Map8
61881763	Cluster_1415	SL3.0ch01	nc_RNA	61881729	61881763	+	N	Solyc01g057570
62781922	Cluster_1416	SL3.0ch01	nc_RNA	62781527	62781922	*	24
62800900	Cluster_1417	SL3.0ch01	nc_RNA	62800535	62800900	*	24
63547876	Cluster_1418	SL3.0ch01	nc_RNA	63547480	63547876	-	24		PROM_Solyc01g057740	Copia	ms309121_SL3.0ch01_RLX-comp_SL3_120k-B-R4218-Map7_reversed
63620891	Cluster_1419	SL3.0ch01	nc_RNA	63620285	63620891	*	24
63672626	Cluster_1420	SL3.0ch01	nc_RNA	63672309	63672626	+	N	Solyc01g057770
63676111	Cluster_1421	SL3.0ch01	nc_RNA	63672737	63676111	+	N	Solyc01g057770
63717774	Cluster_1422	SL3.0ch01	nc_RNA	63717010	63717774	+	24
63866907	Cluster_1423	SL3.0ch01	nc_RNA	63866560	63866907	*	24		PROM_Solyc01g057780
63914573	Cluster_1424	SL3.0ch01	nc_RNA	63914514	63914573	+	N	Solyc01g057805
63962965	Cluster_1425	SL3.0ch01	nc_RNA	63962358	63962965	*	24
64042896	Cluster_1426	SL3.0ch01	nc_RNA	64041668	64042896	*	24
64044356	Cluster_1427	SL3.0ch01	nc_RNA	64043833	64044356	*	24
64056456	Cluster_1428	SL3.0ch01	nc_RNA	64054034	64056456	*	22	Solyc01g057850		Confused_TE	ms309130_SL3.0ch01_RXX_SL3_120k-B-R4657-Map6
64056456	Cluster_1428	SL3.0ch01	nc_RNA	64054034	64056456	*	22	Solyc01g057850		Confused_TE_withPotentialHostGeneDomain	ms309159_SL3.0ch01_RLX-incomp_SL3_120k-B-R7791-Map20
64060170	Cluster_1429	SL3.0ch01	nc_RNA	64057372	64060170	*	22	Solyc01g057850		Copia	ms115047_SL3.0ch01_RIX-incomp-chim_SL3_120k-B-P50.56-Map20
64087229	Cluster_1430	SL3.0ch01	nc_RNA	64086071	64087229	*	24
64097841	Cluster_1431	SL3.0ch01	nc_RNA	64097549	64097841	*	24			PutativeNoutoClassII	ms441698_SL3.0ch01_DXX_SL3_120k-B-R1358-Map13
64097841	Cluster_1431	SL3.0ch01	nc_RNA	64097549	64097841	*	24			SAT	ms572493_SL3.0ch01_RXX-TRIM_SL3_120k-B-R86-Map20
64097841	Cluster_1431	SL3.0ch01	nc_RNA	64097549	64097841	*	24			Unclassified	ms440847_SL3.0ch01_noCat_SL3_120k-B-R283-Map20
64101278	Cluster_1432	SL3.0ch01	nc_RNA	64100676	64101278	*	24
64106637	Cluster_1433	SL3.0ch01	nc_RNA	64106324	64106637	*	24			Unclassified	ms179865_SL3.0ch01_noCat_SL3_120k-B-P162.84-Map20
64106637	Cluster_1433	SL3.0ch01	nc_RNA	64106324	64106637	*	24			TIR_MITEov10	ms179860_SL3.0ch01_DXX-MITE_SL3_120k-B-G372-Map9
64281057	Cluster_1434	SL3.0ch01	nc_RNA	64280837	64281057	*	24
64755872	Cluster_1435	SL3.0ch01	nc_RNA	64755600	64755872	*	24			TIR_MITEov10	ms179873_SL3.0ch01_DXX-MITE_SL3_120k-B-P84.407-Map15
65097779	Cluster_1436	SL3.0ch01	nc_RNA	65097663	65097779	-	N
65141271	Cluster_1437	SL3.0ch01	nc_RNA	65141028	65141271	*	24
65168403	Cluster_1438	SL3.0ch01	nc_RNA	65168313	65168403	+	23
65439279	Cluster_1439	SL3.0ch01	nc_RNA	65438568	65439279	+	24	Solyc01g058140		MuDR	ms117439_SL3.0ch01_DXX_SL3_120k-B-R1574-Map6
65440669	Cluster_1440	SL3.0ch01	nc_RNA	65439380	65440669	+	22	Solyc01g058140
65539853	Cluster_1441	SL3.0ch01	nc_RNA	65538808	65539853	+	N
65548806	Cluster_1442	SL3.0ch01	nc_RNA	65548553	65548806	+	24			Gypsy	ms180532_SL3.0ch01_RYX-incomp-chim_SL3_120k-B-G2058-Map5
65651372	Cluster_1443	SL3.0ch01	nc_RNA	65650999	65651372	*	N			Copia	ms270424_SL3.0ch01_RLX-incomp_SL3_120k-B-R170-Map20
65734879	Cluster_1444	SL3.0ch01	nc_RNA	65734601	65734879	-	24
65820059	Cluster_1445	SL3.0ch01	nc_RNA	65819861	65820059	-	22			Confused_TE_withPotentialHostGeneDomain	ms574031_SL3.0ch01_RXX_SL3_120k-B-R2153-Map8
65820059	Cluster_1445	SL3.0ch01	nc_RNA	65819861	65820059	-	22			Confused_TE_withPotentialHostGeneDomain	ms443224_SL3.0ch01_DTX-incomp-chim_SL3_120k-B-R6897-Map7_reversed
65820059	Cluster_1445	SL3.0ch01	nc_RNA	65819861	65820059	-	22			Unclassified	ms443226_SL3.0ch01_noCat_SL3_120k-B-R778-Map20
65874017	Cluster_1446	SL3.0ch01	nc_RNA	65873613	65874017	*	24			TIR_MITEov10	ms574397_SL3.0ch01_DXX-MITE_SL3_120k-B-R87-Map20
65875154	Cluster_1447	SL3.0ch01	nc_RNA	65874583	65875154	*	24		PROM_Solyc01g058270
65979183	Cluster_1448	SL3.0ch01	nc_RNA	65978691	65979183	*	24
66006623	Cluster_1449	SL3.0ch01	nc_RNA	66006229	66006623	*	24			SSR	ms574408_SL3.0ch01_SSR_SL3_120k-B-R2572-Map7
66009667	Cluster_1450	SL3.0ch01	nc_RNA	66009294	66009667	*	22			PutativeNoutoClassII	ms182176_SL3.0ch01_DXX-MITE_SL3_120k-B-G706-Map8_reversed
66009667	Cluster_1450	SL3.0ch01	nc_RNA	66009294	66009667	*	22			Copia	ms119543_SL3.0ch01_RLX-incomp_SL3_120k-B-R169-Map20
66033685	Cluster_1451	SL3.0ch01	nc_RNA	66031998	66033685	*	N	Solyc01g058320
66281183	Cluster_1452	SL3.0ch01	nc_RNA	66280790	66281183	*	24			Copia	ms358052_SL3.0ch01_RLX-incomp_SL3_120k-B-G96-Map20_reversed
66281183	Cluster_1452	SL3.0ch01	nc_RNA	66280790	66281183	*	24			hAT	ms313303_SL3.0ch01_DTX-incomp_SL3_120k-B-R4806-Map5_reversed
66327586	Cluster_1453	SL3.0ch01	nc_RNA	66327254	66327586	-	N			Unclassified	ms193744_SL3.0ch01_noCat_SL3_120k-B-R231-Map12
66386804	Cluster_1454	SL3.0ch01	nc_RNA	66386464	66386804	*	24
66484043	Cluster_1455	SL3.0ch01	nc_RNA	66483702	66484043	*	N	Solyc01g058450
66654879	Cluster_1456	SL3.0ch01	nc_RNA	66654823	66654879	+	24			hAT	ms193745_SL3.0ch01_DTX-incomp_SL3_120k-B-R2321-Map8
66782025	Cluster_1457	SL3.0ch01	nc_RNA	66780570	66782025	-	N			Copia	ms182528_SL3.0ch01_RIX-incomp-chim_SL3_120k-B-P50.56-Map20
66783016	Cluster_1458	SL3.0ch01	nc_RNA	66782109	66783016	+	N
66806991	Cluster_1459	SL3.0ch01	nc_RNA	66806684	66806991	*	24	Solyc01g058520
66967119	Cluster_1460	SL3.0ch01	nc_RNA	66966894	66967119	-	N
67095590	Cluster_1461	SL3.0ch01	nc_RNA	67095459	67095590	*	22				ms182528_SL3.0ch01_RIX-incomp-chim_SL3_120k-B-P50.56-Map20-exon1
67096059	Cluster_1462	SL3.0ch01	nc_RNA	67095966	67096059	+	22			Unclassified	ms336309_SL3.0ch01_noCat_SL3_120k-B-R778-Map20
67140338	Cluster_1463	SL3.0ch01	nc_RNA	67140158	67140338	-	N
67143759	Cluster_1464	SL3.0ch01	nc_RNA	67143379	67143759	*	24	Solyc01g058595
67317312	Cluster_1465	SL3.0ch01	nc_RNA	67316933	67317312	*	24			Unclassified	ms355255_SL3.0ch01_noCat_SL3_120k-B-G1208-Map11
67456014	Cluster_1466	SL3.0ch01	nc_RNA	67455809	67456014	*	24
67462944	Cluster_1467	SL3.0ch01	nc_RNA	67461422	67462944	-	N	Solyc01g058670
67466221	Cluster_1468	SL3.0ch01	nc_RNA	67465933	67466221	*	24
67699343	Cluster_1469	SL3.0ch01	nc_RNA	67699184	67699343	+	23
67722369	Cluster_1470	SL3.0ch01	nc_RNA	67722175	67722369	*	N
68300969	Cluster_1471	SL3.0ch01	nc_RNA	68300479	68300969	+	N			TIR_MITEov10	ms119580_SL3.0ch01_DXX-MITE_SL3_120k-B-R3744-Map5
68406297	Cluster_1472	SL3.0ch01	nc_RNA	68405677	68406297	-	24
68840242	Cluster_1473	SL3.0ch01	nc_RNA	68839685	68840242	*	N
68850131	Cluster_1474	SL3.0ch01	nc_RNA	68849808	68850131	*	24		PROM_Solyc01g059860
68876776	Cluster_1475	SL3.0ch01	nc_RNA	68876250	68876776	*	24
68888263	Cluster_1476	SL3.0ch01	nc_RNA	68887723	68888263	*	24			Confused_TE	ms237426_SL3.0ch01_RLX-incomp_SL3_120k-B-R7539-Map9_reversed
68990124	Cluster_1477	SL3.0ch01	nc_RNA	68989827	68990124	*	N				ms237426_SL3.0ch01_RLX-incomp_SL3_120k-B-R7539-Map9_reversed-exon1
69086319	Cluster_1478	SL3.0ch01	nc_RNA	69086050	69086319	-	22			Confused_TE	ms193788_SL3.0ch01_RIX-incomp_SL3_120k-B-R6856-Map5
69160966	Cluster_1479	SL3.0ch01	nc_RNA	69160758	69160966	+	N		PROM_Solyc01g059900
69277201	Cluster_1480	SL3.0ch01	nc_RNA	69276826	69277201	*	23			Unclassified	ms446057_SL3.0ch01_noCat_SL3_120k-B-G681-Map20
69286399	Cluster_1481	SL3.0ch01	nc_RNA	69286006	69286399	+	24
69288122	Cluster_1482	SL3.0ch01	nc_RNA	69287918	69288122	+	24		PROM_Solyc01g059950	Confused_TE	ms446066_SL3.0ch01_DXX-MITE_SL3_120k-B-R2337-Map12
69288122	Cluster_1482	SL3.0ch01	nc_RNA	69287918	69288122	+	24		PROM_Solyc01g059950	Unclassified	ms446060_SL3.0ch01_noCat_SL3_120k-B-R1245-Map9
69299422	Cluster_1483	SL3.0ch01	nc_RNA	69298992	69299422	*	24		PROM_Solyc01g059960	PutativeNoutoClassII	ms118079_SL3.0ch01_DXX_SL3_120k-B-R2407-Map6
69321234	Cluster_1484	SL3.0ch01	nc_RNA	69320921	69321234	*	24		PROM_Solyc01g059980	Unclassified	ms118083_SL3.0ch01_noCat_SL3_120k-B-R2455-Map6
69321234	Cluster_1484	SL3.0ch01	nc_RNA	69320921	69321234	*	24		PROM_Solyc01g059965	Unclassified	ms118083_SL3.0ch01_noCat_SL3_120k-B-R2455-Map6
69323410	Cluster_1485	SL3.0ch01	nc_RNA	69322418	69323410	+	N	Solyc01g059980
69323410	Cluster_1485	SL3.0ch01	nc_RNA	69322418	69323410	+	N	Solyc01g059965
69324220	Cluster_1486	SL3.0ch01	nc_RNA	69323710	69324220	+	24
69345281	Cluster_1487	SL3.0ch01	nc_RNA	69344069	69345281	-	N	Solyc01g059990
69345281	Cluster_1487	SL3.0ch01	nc_RNA	69344069	69345281	-	N	Solyc01g060020
69348590	Cluster_1488	SL3.0ch01	nc_RNA	69348299	69348590	-	24			Copia	ms315311_SL3.0ch01_RLX-incomp-chim_SL3_120k-B-R152-Map20
69378538	Cluster_1489	SL3.0ch01	nc_RNA	69377300	69378538	*	24		PROM_Solyc01g060030
69380530	Cluster_1490	SL3.0ch01	nc_RNA	69379463	69380530	+	N	Solyc01g060030
69384140	Cluster_1491	SL3.0ch01	nc_RNA	69383855	69384140	*	24
69384945	Cluster_1492	SL3.0ch01	nc_RNA	69384586	69384945	*	24
69456800	Cluster_1493	SL3.0ch01	nc_RNA	69455876	69456800	*	24
69480489	Cluster_1494	SL3.0ch01	nc_RNA	69479600	69480489	*	24	Solyc01g060080
69481419	Cluster_1495	SL3.0ch01	nc_RNA	69480608	69481419	*	24	Solyc01g060080
69496084	Cluster_1496	SL3.0ch01	nc_RNA	69495505	69496084	+	N	Solyc01g060080
69496084	Cluster_1496	SL3.0ch01	nc_RNA	69495505	69496084	+	N	Solyc01g060080
69501110	Cluster_1497	SL3.0ch01	nc_RNA	69500181	69501110	-	22	Solyc01g060085
69552456	Cluster_1498	SL3.0ch01	nc_RNA	69552220	69552456	-	N
69650093	Cluster_1499	SL3.0ch01	nc_RNA	69649892	69650093	+	24		PROM_Solyc01g060170	SSR	ms315328_SL3.0ch01_SSR_SL3_120k-B-R3083-Map5
69650989	Cluster_1500	SL3.0ch01	nc_RNA	69650336	69650989	*	24		PROM_Solyc01g060170
69653254	Cluster_1501	SL3.0ch01	nc_RNA	69652686	69653254	*	24
69679016	Cluster_1502	SL3.0ch01	nc_RNA	69678814	69679016	*	24
69687244	Cluster_1503	SL3.0ch01	nc_RNA	69686776	69687244	*	24
69691400	Cluster_1504	SL3.0ch01	nc_RNA	69691004	69691400	*	24
69717935	Cluster_1505	SL3.0ch01	nc_RNA	69717832	69717935	*	24
69725410	Cluster_1506	SL3.0ch01	nc_RNA	69725192	69725410	+	24		PROM_Solyc01g060200	Confused_TE	ms315350_SL3.0ch01_RLX-incomp-chim_SL3_120k-B-R620-Map17_reversed
69733816	Cluster_1507	SL3.0ch01	nc_RNA	69733475	69733816	*	24
69737185	Cluster_1508	SL3.0ch01	nc_RNA	69737066	69737185	*	22	Solyc01g060210	PROM_Solyc01g060205
69740240	Cluster_1509	SL3.0ch01	nc_RNA	69740012	69740240	*	24	Solyc01g060215
69742095	Cluster_1510	SL3.0ch01	nc_RNA	69741724	69742095	-	24		PROM_Solyc01g060215	Gypsy	ms184343_SL3.0ch01_RLX-incomp_SL3_120k-B-G1748-Map20
69742095	Cluster_1510	SL3.0ch01	nc_RNA	69741724	69742095	-	24		PROM_Solyc01g060220	Gypsy	ms184343_SL3.0ch01_RLX-incomp_SL3_120k-B-G1748-Map20
69743293	Cluster_1511	SL3.0ch01	nc_RNA	69743006	69743293	*	24		PROM_Solyc01g060220	hAT	ms315498_SL3.0ch01_DTX-incomp_SL3_120k-B-R1768-Map20
69850636	Cluster_1512	SL3.0ch01	nc_RNA	69850289	69850636	*	24		PROM_Solyc01g060240
69943593	Cluster_1513	SL3.0ch01	nc_RNA	69943423	69943593	-	N			hAT	ms315498_SL3.0ch01_DTX-incomp_SL3_120k-B-R1768-Map20
69943593	Cluster_1513	SL3.0ch01	nc_RNA	69943423	69943593	-	N				ms315498_SL3.0ch01_DTX-incomp_SL3_120k-B-R1768-Map20-exon2
69985647	Cluster_1514	SL3.0ch01	nc_RNA	69985406	69985647	-	N
70022818	Cluster_1515	SL3.0ch01	nc_RNA	70022552	70022818	-	N		PROM_Solyc01g060286	LINE	ms315510_SL3.0ch01_RIX-comp_SL3_120k-B-R2369-Map16
70834648	Cluster_1516	SL3.0ch01	nc_RNA	70834392	70834648	+	24		PROM_Solyc01g060420	LINE	ms315510_SL3.0ch01_RIX-comp_SL3_120k-B-R2369-Map16
70911554	Cluster_1517	SL3.0ch01	nc_RNA	70911009	70911554	+	24
70913289	Cluster_1518	SL3.0ch01	nc_RNA	70912857	70913289	+	24			put_hAT	ms161836_SL3.0ch01_DTX-incomp_SL3_120k-B-R325-Map20
70992253	Cluster_1519	SL3.0ch01	nc_RNA	70991834	70992253	+	N	Solyc01g060470
70992925	Cluster_1520	SL3.0ch01	nc_RNA	70992361	70992925	+	N	Solyc01g060470
71201731	Cluster_1521	SL3.0ch01	nc_RNA	71201245	71201731	*	24
71555391	Cluster_1522	SL3.0ch01	nc_RNA	71555060	71555391	*	24
71564528	Cluster_1523	SL3.0ch01	nc_RNA	71564093	71564528	*	24
71570143	Cluster_1524	SL3.0ch01	nc_RNA	71569657	71570143	*	24
71582301	Cluster_1525	SL3.0ch01	nc_RNA	71581791	71582301	*	24			hAT	ms113547_SL3.0ch01_DTX-incomp_SL3_120k-B-R488-Map20
71604491	Cluster_1526	SL3.0ch01	nc_RNA	71603430	71604491	*	24
71618508	Cluster_1527	SL3.0ch01	nc_RNA	71618036	71618508	*	24		PROM_Solyc01g065530
71622875	Cluster_1528	SL3.0ch01	nc_RNA	71619607	71622875	+	N	Solyc01g065540
71622875	Cluster_1528	SL3.0ch01	nc_RNA	71619607	71622875	+	N	Solyc01g065530
71652236	Cluster_1529	SL3.0ch01	nc_RNA	71651611	71652236	*	24			Gypsy	ms578178_SL3.0ch01_RLX-incomp_SL3_120k-B-G895-Map7
71657170	Cluster_1530	SL3.0ch01	nc_RNA	71656992	71657170	*	24			Gypsy	ms578178_SL3.0ch01_RLX-incomp_SL3_120k-B-G895-Map7
71657170	Cluster_1530	SL3.0ch01	nc_RNA	71656992	71657170	*	24			Unclassified	ms447184_SL3.0ch01_noCat_SL3_120k-B-R119-Map10
71659070	Cluster_1531	SL3.0ch01	nc_RNA	71658726	71659070	*	24			Gypsy	ms447202_SL3.0ch01_RLX-incomp-chim_SL3_120k-B-R702-Map10
71729687	Cluster_1532	SL3.0ch01	nc_RNA	71729375	71729687	*	24			Unclassified	ms447206_SL3.0ch01_noCat_SL3_120k-B-R7092-Map5
71729687	Cluster_1532	SL3.0ch01	nc_RNA	71729375	71729687	*	24			SAT	ms447208_SL3.0ch01_RXX-TRIM_SL3_120k-B-R725-Map6
71731208	Cluster_1533	SL3.0ch01	nc_RNA	71731055	71731208	+	22
71743884	Cluster_1534	SL3.0ch01	nc_RNA	71743444	71743884	*	24		PROM_Solyc01g065570	Confused_TE_withPotentialHostGeneDomain	ms447271_SL3.0ch01_RXX_SL3_120k-B-R2153-Map8
71771302	Cluster_1535	SL3.0ch01	nc_RNA	71770696	71771302	+	N			HostGene	ms316433_SL3.0ch01_PotentialHostGene_SL3_120k-B-R7815-Map13
71772630	Cluster_1536	SL3.0ch01	nc_RNA	71772387	71772630	+	N		PROM_Solyc01g065590
71779080	Cluster_1537	SL3.0ch01	nc_RNA	71778950	71779080	*	N
71834453	Cluster_1538	SL3.0ch01	nc_RNA	71833818	71834453	*	N
72095626	Cluster_1539	SL3.0ch01	nc_RNA	72095105	72095626	*	24
72100584	Cluster_1540	SL3.0ch01	nc_RNA	72100488	72100584	*	24
72107384	Cluster_1541	SL3.0ch01	nc_RNA	72107172	72107384	*	24
72148988	Cluster_1542	SL3.0ch01	nc_RNA	72148745	72148988	*	24
72164441	Cluster_1543	SL3.0ch01	nc_RNA	72164261	72164441	*	24	Solyc01g065740
72184397	Cluster_1544	SL3.0ch01	nc_RNA	72184245	72184397	-	N		PROM_Solyc01g065760	Copia	ms620757_SL3.0ch01_RLX-incomp_SL3_120k-B-R2151-Map13
72185439	Cluster_1545	SL3.0ch01	nc_RNA	72185217	72185439	*	N				ms620757_SL3.0ch01_RLX-incomp_SL3_120k-B-R2151-Map13-exon2
72299985	Cluster_1546	SL3.0ch01	nc_RNA	72299751	72299985	-	N
72565831	Cluster_1547	SL3.0ch01	nc_RNA	72565745	72565831	-	23			Unclassified	ms316901_SL3.0ch01_noCat_SL3_120k-B-P71.46-Map20
72594950	Cluster_1548	SL3.0ch01	nc_RNA	72594075	72594950	-	N	Solyc01g065980
72596470	Cluster_1549	SL3.0ch01	nc_RNA	72596174	72596470	-	N	Solyc01g065980
72604391	Cluster_1550	SL3.0ch01	nc_RNA	72603856	72604391	*	24		PROM_Solyc01g065980
72781512	Cluster_1551	SL3.0ch01	nc_RNA	72780390	72781512	*	24
72803169	Cluster_1552	SL3.0ch01	nc_RNA	72801411	72803169	-	N	Solyc01g066050
72805465	Cluster_1553	SL3.0ch01	nc_RNA	72805091	72805465	*	24
72842007	Cluster_1554	SL3.0ch01	nc_RNA	72841783	72842007	-	24			Confused_TE_withPotentialHostGeneDomain	ms316910_SL3.0ch01_RXX_SL3_120k-B-R2153-Map8
72849846	Cluster_1555	SL3.0ch01	nc_RNA	72848769	72849846	*	24			PutativeNoutoClassII	ms316912_SL3.0ch01_DXX_SL3_120k-B-R2407-Map6
72852019	Cluster_1556	SL3.0ch01	nc_RNA	72851728	72852019	*	24
72856599	Cluster_1557	SL3.0ch01	nc_RNA	72856460	72856599	-	24	Solyc01g066070
72857536	Cluster_1558	SL3.0ch01	nc_RNA	72857240	72857536	*	24		PROM_Solyc01g066070
73183666	Cluster_1559	SL3.0ch01	nc_RNA	73183552	73183666	*	24			MuDR	ms424204_SL3.0ch01_DXX_SL3_120k-B-G1936-Map5
73188976	Cluster_1560	SL3.0ch01	nc_RNA	73188157	73188976	*	24
73214004	Cluster_1561	SL3.0ch01	nc_RNA	73213818	73214004	*	24			Gypsy	ms446056_SL3.0ch01_RLX-incomp-chim_SL3_120k-B-G119-Map17
73241487	Cluster_1562	SL3.0ch01	nc_RNA	73241341	73241487	*	24
73416055	Cluster_1563	SL3.0ch01	nc_RNA	73415882	73416055	-	N			HostGene	ms118381_SL3.0ch01_PotentialHostGene_SL3_120k-B-R7815-Map13
73416055	Cluster_1563	SL3.0ch01	nc_RNA	73415882	73416055	-	N			Copia_withPotentialHostGeneDomain	ms424222_SL3.0ch01_RLX-incomp_SL3_120k-B-R210-Map6
73727954	Cluster_1564	SL3.0ch01	nc_RNA	73727816	73727954	*	24		PROM_Solyc01g066290	put_hAT	ms620854_SL3.0ch01_DTX-incomp_SL3_120k-B-R325-Map20
73929939	Cluster_1565	SL3.0ch01	nc_RNA	73929768	73929939	-	24			Confused_TE_withPotentialHostGeneDomain	ms124045_SL3.0ch01_RXX_SL3_120k-B-R2153-Map8
73929939	Cluster_1565	SL3.0ch01	nc_RNA	73929768	73929939	-	24			Unclassified	ms118569_SL3.0ch01_noCat_SL3_120k-B-R129-Map5
74126635	Cluster_1566	SL3.0ch01	nc_RNA	74126287	74126635	-	24
74131060	Cluster_1567	SL3.0ch01	nc_RNA	74129721	74131060	-	N
74151507	Cluster_1568	SL3.0ch01	nc_RNA	74151187	74151507	*	24		PROM_Solyc01g066440	Unclassified	ms179892_SL3.0ch01_noCat_SL3_120k-B-R2595-Map11
74161060	Cluster_1569	SL3.0ch01	nc_RNA	74160414	74161060	*	24
74172838	Cluster_1570	SL3.0ch01	nc_RNA	74172114	74172838	*	24			Unclassified	ms179892_SL3.0ch01_noCat_SL3_120k-B-R2595-Map11
74305552	Cluster_1571	SL3.0ch01	nc_RNA	74305000	74305552	*	24		PROM_Solyc01g066500
74339947	Cluster_1572	SL3.0ch01	nc_RNA	74339900	74339947	-	N	Solyc01g066520
74346926	Cluster_1573	SL3.0ch01	nc_RNA	74346427	74346926	+	24			Confused_TE_withPotentialHostGeneDomain	ms118683_SL3.0ch01_RXX_SL3_120k-B-R2153-Map8
74346926	Cluster_1573	SL3.0ch01	nc_RNA	74346427	74346926	+	24			TIR_MITEov10	ms319139_SL3.0ch01_DTX-incomp_SL3_120k-B-G1236-Map8
74355890	Cluster_1574	SL3.0ch01	nc_RNA	74355697	74355890	-	24			PutativeNoutoClassII	ms319141_SL3.0ch01_DXX-MITE_SL3_120k-B-P404.225-Map14_reversed
74370612	Cluster_1575	SL3.0ch01	nc_RNA	74370412	74370612	-	24
74372955	Cluster_1576	SL3.0ch01	nc_RNA	74372620	74372955	+	24			PutativeNoutoClassII	ms319141_SL3.0ch01_DXX-MITE_SL3_120k-B-P404.225-Map14_reversed
74373678	Cluster_1577	SL3.0ch01	nc_RNA	74373621	74373678	+	24
74406969	Cluster_1578	SL3.0ch01	nc_RNA	74405620	74406969	*	N
74452486	Cluster_1579	SL3.0ch01	nc_RNA	74452095	74452486	+	24		PROM_Solyc01g066570	Copia	ms319144_SL3.0ch01_RYX-incomp-chim_SL3_120k-B-P54.93-Map20
74458756	Cluster_1580	SL3.0ch01	nc_RNA	74458141	74458756	*	24			Unclassified	ms319151_SL3.0ch01_noCat_SL3_120k-B-R129-Map5
74458756	Cluster_1580	SL3.0ch01	nc_RNA	74458141	74458756	*	24			Confused_TE_withPotentialHostGeneDomain	ms319153_SL3.0ch01_RXX_SL3_120k-B-R2153-Map8
74469217	Cluster_1581	SL3.0ch01	nc_RNA	74468190	74469217	*	24			Unclassified	ms451138_SL3.0ch01_noCat_SL3_120k-B-R4262-Map5
74482803	Cluster_1582	SL3.0ch01	nc_RNA	74482355	74482803	-	24			HostGene	ms189035_SL3.0ch01_noCat_SL3_120k-B-R3049-Map6
74517822	Cluster_1583	SL3.0ch01	nc_RNA	74517493	74517822	*	24		PROM_Solyc01g066610
74569048	Cluster_1584	SL3.0ch01	nc_RNA	74568608	74569048	-	24			HostGene	ms189043_SL3.0ch01_PotentialHostGene_SL3_120k-B-R7815-Map13
74571915	Cluster_1585	SL3.0ch01	nc_RNA	74571572	74571915	+	24		PROM_Solyc01g066620
74575483	Cluster_1586	SL3.0ch01	nc_RNA	74575122	74575483	*	24	Solyc01g066620
74578806	Cluster_1587	SL3.0ch01	nc_RNA	74578664	74578806	*	24	Solyc01g066620
74587509	Cluster_1588	SL3.0ch01	nc_RNA	74587158	74587509	-	24			TIR_MITEov10	ms124137_SL3.0ch01_DTX-incomp_SL3_120k-B-R1100-Map5
74603223	Cluster_1589	SL3.0ch01	nc_RNA	74602589	74603223	*	24
74637624	Cluster_1590	SL3.0ch01	nc_RNA	74637414	74637624	*	23				ms124137_SL3.0ch01_DTX-incomp_SL3_120k-B-R1100-Map5-exon2
74644476	Cluster_1591	SL3.0ch01	nc_RNA	74644147	74644476	*	24
74658532	Cluster_1592	SL3.0ch01	nc_RNA	74658263	74658532	*	24
74661208	Cluster_1593	SL3.0ch01	nc_RNA	74661001	74661208	+	24		PROM_Solyc01g066650	Unclassified	ms320171_SL3.0ch01_noCat_SL3_120k-B-R3197-Map5
74662258	Cluster_1594	SL3.0ch01	nc_RNA	74661350	74662258	*	24		PROM_Solyc01g066650	Confused_TE_withPotentialHostGeneDomain	ms320198_SL3.0ch01_RLX-incomp_SL3_120k-B-R7791-Map20
74662258	Cluster_1594	SL3.0ch01	nc_RNA	74661350	74662258	*	24		PROM_Solyc01g066650	Copia	ms320190_SL3.0ch01_RLX-incomp-chim_SL3_120k-B-R550-Map20_reversed
74664541	Cluster_1595	SL3.0ch01	nc_RNA	74664317	74664541	*	24		PROM_Solyc01g066680
74684954	Cluster_1596	SL3.0ch01	nc_RNA	74684558	74684954	*	24	Solyc01g066700
74687712	Cluster_1597	SL3.0ch01	nc_RNA	74687016	74687712	-	N	Solyc01g066720	PROM_Solyc01g066700
74687712	Cluster_1597	SL3.0ch01	nc_RNA	74687016	74687712	-	N	Solyc01g066720	PROM_Solyc01g066710
74689338	Cluster_1598	SL3.0ch01	nc_RNA	74688668	74689338	-	N	Solyc01g066720
74703956	Cluster_1599	SL3.0ch01	nc_RNA	74703202	74703956	*	24
74720630	Cluster_1600	SL3.0ch01	nc_RNA	74719132	74720630	*	24			Unclassified	ms320328_SL3.0ch01_noCat_SL3_120k-B-P71.46-Map20
74724028	Cluster_1601	SL3.0ch01	nc_RNA	74723726	74724028	-	24			PutativeNoutoClassII	ms320331_SL3.0ch01_DXX-MITE_SL3_120k-B-R1964-Map5
74734093	Cluster_1602	SL3.0ch01	nc_RNA	74734042	74734093	-	24		PROM_Solyc01g066750
74741422	Cluster_1603	SL3.0ch01	nc_RNA	74741226	74741422	*	24			Gypsy	ms320355_SL3.0ch01_RLX-incomp_SL3_120k-B-R4044-Map20_reversed
74741422	Cluster_1603	SL3.0ch01	nc_RNA	74741226	74741422	*	24				ms320331_SL3.0ch01_DXX-MITE_SL3_120k-B-R1964-Map5-exon1
74742919	Cluster_1604	SL3.0ch01	nc_RNA	74742799	74742919	-	24
74760151	Cluster_1605	SL3.0ch01	nc_RNA	74759943	74760151	*	24
74804785	Cluster_1606	SL3.0ch01	nc_RNA	74804355	74804785	*	24	Solyc01g066810
74805754	Cluster_1607	SL3.0ch01	nc_RNA	74805701	74805754	+	24		PROM_Solyc01g066810
74807080	Cluster_1608	SL3.0ch01	nc_RNA	74806723	74807080	+	24		PROM_Solyc01g066810
74870674	Cluster_1609	SL3.0ch01	nc_RNA	74870544	74870674	+	N	Solyc01g066840
74871586	Cluster_1610	SL3.0ch01	nc_RNA	74871367	74871586	+	N	Solyc01g066840
74967307	Cluster_1611	SL3.0ch01	nc_RNA	74966958	74967307	*	N		PROM_Solyc01g066900
74991707	Cluster_1612	SL3.0ch01	nc_RNA	74991288	74991707	*	24
74992883	Cluster_1613	SL3.0ch01	nc_RNA	74992615	74992883	*	24		PROM_Solyc01g066910
75033757	Cluster_1614	SL3.0ch01	nc_RNA	75033229	75033757	*	24
75039632	Cluster_1615	SL3.0ch01	nc_RNA	75038617	75039632	*	24
75080627	Cluster_1616	SL3.0ch01	nc_RNA	75079845	75080627	*	24			Gypsy	ms451621_SL3.0ch01_RYX-incomp-chim_SL3_120k-B-G2058-Map5
75123900	Cluster_1617	SL3.0ch01	nc_RNA	75123821	75123900	+	24
75124722	Cluster_1618	SL3.0ch01	nc_RNA	75124517	75124722	+	N
75156032	Cluster_1619	SL3.0ch01	nc_RNA	75155973	75156032	-	24			PutativeNoutoClassII	ms112794_SL3.0ch01_DXX_SL3_120k-B-R120-Map20
75157672	Cluster_1620	SL3.0ch01	nc_RNA	75157212	75157672	*	24
75161031	Cluster_1621	SL3.0ch01	nc_RNA	75160724	75161031	*	24
75166344	Cluster_1622	SL3.0ch01	nc_RNA	75164924	75166344	+	N	Solyc01g067010
75167212	Cluster_1623	SL3.0ch01	nc_RNA	75166699	75167212	*	24
75169445	Cluster_1624	SL3.0ch01	nc_RNA	75168948	75169445	*	24	Solyc01g067020		PutativeNoutoClassII	ms112794_SL3.0ch01_DXX_SL3_120k-B-R120-Map20
75170890	Cluster_1625	SL3.0ch01	nc_RNA	75169580	75170890	*	24	Solyc01g067020
75173622	Cluster_1626	SL3.0ch01	nc_RNA	75173181	75173622	*	24		PROM_Solyc01g067020
75178140	Cluster_1627	SL3.0ch01	nc_RNA	75178069	75178140	*	24	Solyc01g067025
75180847	Cluster_1628	SL3.0ch01	nc_RNA	75180591	75180847	*	24
75181750	Cluster_1629	SL3.0ch01	nc_RNA	75180983	75181750	*	24
75231945	Cluster_1630	SL3.0ch01	nc_RNA	75231038	75231945	*	24	Solyc01g067080
75235413	Cluster_1631	SL3.0ch01	nc_RNA	75234367	75235413	*	24	Solyc01g067080
75238392	Cluster_1632	SL3.0ch01	nc_RNA	75238110	75238392	-	24		PROM_Solyc01g067080
75239163	Cluster_1633	SL3.0ch01	nc_RNA	75238798	75239163	*	24
75241973	Cluster_1634	SL3.0ch01	nc_RNA	75241024	75241973	+	24				ms112794_SL3.0ch01_DXX_SL3_120k-B-R120-Map20-exon2
75258803	Cluster_1635	SL3.0ch01	nc_RNA	75258007	75258803	+	24			Helitron	ms294769_SL3.0ch01_DHX-incomp-chim_SL3_120k-B-R6210-Map5
75279266	Cluster_1636	SL3.0ch01	nc_RNA	75278682	75279266	-	N	Solyc01g067100
75314234	Cluster_1637	SL3.0ch01	nc_RNA	75313914	75314234	-	24
75330233	Cluster_1638	SL3.0ch01	nc_RNA	75329919	75330233	*	24			PutativeNoutoClassII	ms250186_SL3.0ch01_DXX_SL3_120k-B-R2407-Map6
75330233	Cluster_1638	SL3.0ch01	nc_RNA	75329919	75330233	*	24			TIR_MITEov10	ms583913_SL3.0ch01_DXX-MITE_SL3_120k-B-R3744-Map5
75333976	Cluster_1639	SL3.0ch01	nc_RNA	75333286	75333976	*	24
75339693	Cluster_1640	SL3.0ch01	nc_RNA	75339238	75339693	*	24
75394892	Cluster_1641	SL3.0ch01	nc_RNA	75393657	75394892	*	24			Gypsy	ms583917_SL3.0ch01_RLX-incomp_SL3_120k-B-G1580-Map6_reversed
75422575	Cluster_1642	SL3.0ch01	nc_RNA	75422131	75422575	*	24		PROM_Solyc01g067180	Gypsy	ms583917_SL3.0ch01_RLX-incomp_SL3_120k-B-G1580-Map6_reversed
75450968	Cluster_1643	SL3.0ch01	nc_RNA	75450415	75450968	*	24			Copia	ms293937_SL3.0ch01_RLX-incomp_SL3_120k-B-R769-Map5
75478336	Cluster_1644	SL3.0ch01	nc_RNA	75477251	75478336	+	24	Solyc01g067273
75478336	Cluster_1644	SL3.0ch01	nc_RNA	75477251	75478336	+	24	Solyc01g067275
75508601	Cluster_1645	SL3.0ch01	nc_RNA	75508193	75508601	*	24
75539077	Cluster_1646	SL3.0ch01	nc_RNA	75538396	75539077	*	24	Solyc01g067300
75541037	Cluster_1647	SL3.0ch01	nc_RNA	75540552	75541037	*	24		PROM_Solyc01g067300	Confused_TE_withPotentialHostGeneDomain	ms372972_SL3.0ch01_RXX_SL3_120k-B-R2153-Map8
75622843	Cluster_1648	SL3.0ch01	nc_RNA	75622675	75622843	*	24	Solyc01g067340
75634623	Cluster_1649	SL3.0ch01	nc_RNA	75634432	75634623	*	24		PROM_Solyc01g067360	Gypsy	ms584648_SL3.0ch01_RLX-incomp-chim_SL3_120k-B-R702-Map10
75635455	Cluster_1650	SL3.0ch01	nc_RNA	75634960	75635455	*	24
75651008	Cluster_1651	SL3.0ch01	nc_RNA	75650865	75651008	*	23		PROM_Solyc01g067370
75654559	Cluster_1652	SL3.0ch01	nc_RNA	75654219	75654559	*	24			SAT	ms61135_SL3.0ch01_RXX-LARD_SL3_120k-B-R722-Map11
75677827	Cluster_1653	SL3.0ch01	nc_RNA	75677483	75677827	*	23		PROM_Solyc01g067390
75704952	Cluster_1654	SL3.0ch01	nc_RNA	75704467	75704952	*	24			CACTA	ms462172_SL3.0ch01_DTX-incomp-chim_SL3_120k-B-R1765-Map10_reversed
75707248	Cluster_1655	SL3.0ch01	nc_RNA	75706242	75707248	*	24
75765572	Cluster_1656	SL3.0ch01	nc_RNA	75765270	75765572	*	24			PutativeNoutoClassII	ms119467_SL3.0ch01_DXX_SL3_120k-B-G1559-Map5
75767991	Cluster_1657	SL3.0ch01	nc_RNA	75767472	75767991	+	24
75782888	Cluster_1658	SL3.0ch01	nc_RNA	75782857	75782888	-	22				ms119467_SL3.0ch01_DXX_SL3_120k-B-G1559-Map5-exon1
75806301	Cluster_1659	SL3.0ch01	nc_RNA	75806082	75806301	*	24			Gypsy	ms307566_SL3.0ch01_RLX-incomp-chim_SL3_120k-B-R702-Map10
75896645	Cluster_1660	SL3.0ch01	nc_RNA	75896270	75896645	*	24
75950296	Cluster_1661	SL3.0ch01	nc_RNA	75949585	75950296	*	24
75965438	Cluster_1662	SL3.0ch01	nc_RNA	75965280	75965438	-	24
75996578	Cluster_1663	SL3.0ch01	nc_RNA	75996077	75996578	+	24	Solyc01g067480			ms307566_SL3.0ch01_RLX-incomp-chim_SL3_120k-B-R702-Map10-exon1
76044536	Cluster_1664	SL3.0ch01	nc_RNA	76044369	76044536	+	N	Solyc01g067500
76057772	Cluster_1665	SL3.0ch01	nc_RNA	76057628	76057772	*	24
76074370	Cluster_1666	SL3.0ch01	nc_RNA	76073807	76074370	*	24
76074831	Cluster_1667	SL3.0ch01	nc_RNA	76074446	76074831	*	24
76082116	Cluster_1668	SL3.0ch01	nc_RNA	76081110	76082116	+	24
76084629	Cluster_1669	SL3.0ch01	nc_RNA	76084125	76084629	*	24		PROM_Solyc01g067530
76098864	Cluster_1670	SL3.0ch01	nc_RNA	76098297	76098864	*	24			TIR_MITEov10	ms119520_SL3.0ch01_DTX-incomp_SL3_120k-B-G1175-Map20
76099877	Cluster_1671	SL3.0ch01	nc_RNA	76099679	76099877	*	24
76106209	Cluster_1672	SL3.0ch01	nc_RNA	76106141	76106209	*	24
76106528	Cluster_1673	SL3.0ch01	nc_RNA	76106293	76106528	*	24
76107533	Cluster_1674	SL3.0ch01	nc_RNA	76107286	76107533	*	N			TIR_MITEov10	ms119520_SL3.0ch01_DTX-incomp_SL3_120k-B-G1175-Map20
76109924	Cluster_1675	SL3.0ch01	nc_RNA	76109793	76109924	*	24		PROM_Solyc01g067540		ms119520_SL3.0ch01_DTX-incomp_SL3_120k-B-G1175-Map20-exon1
76131555	Cluster_1676	SL3.0ch01	nc_RNA	76131160	76131555	*	24			TIR_MITEov10	ms119523_SL3.0ch01_DXX-MITE_SL3_120k-B-G372-Map9
76156039	Cluster_1677	SL3.0ch01	nc_RNA	76155516	76156039	*	24
76161041	Cluster_1678	SL3.0ch01	nc_RNA	76159988	76161041	*	24
76189512	Cluster_1679	SL3.0ch01	nc_RNA	76189341	76189512	*	24			Copia	ms119524_SL3.0ch01_RYX-incomp-chim_SL3_120k-B-G42-Map20_reversed
76214617	Cluster_1680	SL3.0ch01	nc_RNA	76214212	76214617	*	24
76238487	Cluster_1681	SL3.0ch01	nc_RNA	76238026	76238487	*	23
76243273	Cluster_1682	SL3.0ch01	nc_RNA	76242943	76243273	*	23
76272926	Cluster_1683	SL3.0ch01	nc_RNA	76272728	76272926	*	23
76274164	Cluster_1684	SL3.0ch01	nc_RNA	76273760	76274164	-	23
76304679	Cluster_1685	SL3.0ch01	nc_RNA	76304367	76304679	*	24
76306244	Cluster_1686	SL3.0ch01	nc_RNA	76305869	76306244	*	24
76307602	Cluster_1687	SL3.0ch01	nc_RNA	76307283	76307602	-	24			Mariner	ms455025_SL3.0ch01_DTX-incomp_SL3_120k-B-R9474-Map5_reversed
76310347	Cluster_1688	SL3.0ch01	nc_RNA	76309954	76310347	*	24
76332546	Cluster_1689	SL3.0ch01	nc_RNA	76332077	76332546	*	24	Solyc01g067650		Copia	ms193717_SL3.0ch01_RYX-incomp-chim_SL3_120k-B-G180-Map20_reversed
76332546	Cluster_1689	SL3.0ch01	nc_RNA	76332077	76332546	*	24	Solyc01g067650			ms193717_SL3.0ch01_RYX-incomp-chim_SL3_120k-B-G180-Map20_reversed-exon2
76356619	Cluster_1690	SL3.0ch01	nc_RNA	76356515	76356619	*	24
76364789	Cluster_1691	SL3.0ch01	nc_RNA	76364332	76364789	+	N	Solyc01g067660
76366082	Cluster_1692	SL3.0ch01	nc_RNA	76365495	76366082	+	N	Solyc01g067660
76367384	Cluster_1693	SL3.0ch01	nc_RNA	76366172	76367384	+	N	Solyc01g067660
76373439	Cluster_1694	SL3.0ch01	nc_RNA	76372428	76373439	-	N	Solyc01g067680
76374882	Cluster_1695	SL3.0ch01	nc_RNA	76374390	76374882	-	N	Solyc01g067680
76377080	Cluster_1696	SL3.0ch01	nc_RNA	76376248	76377080	*	24		PROM_Solyc01g067680
76394561	Cluster_1697	SL3.0ch01	nc_RNA	76394531	76394561	-	24		PROM_Solyc01g067690
76454562	Cluster_1698	SL3.0ch01	nc_RNA	76454417	76454562	*	24
76456047	Cluster_1699	SL3.0ch01	nc_RNA	76455975	76456047	-	24			Confused_TE	ms193723_SL3.0ch01_RIX-incomp_SL3_120k-B-P242.323-Map6
76458766	Cluster_1700	SL3.0ch01	nc_RNA	76457876	76458766	*	24
76468705	Cluster_1701	SL3.0ch01	nc_RNA	76468229	76468705	*	24
76475646	Cluster_1702	SL3.0ch01	nc_RNA	76475218	76475646	*	24		PROM_Solyc01g067720
76487506	Cluster_1703	SL3.0ch01	nc_RNA	76487115	76487506	+	N	Solyc01g067730
76492857	Cluster_1704	SL3.0ch01	nc_RNA	76492670	76492857	*	24		PROM_Solyc01g067740	hAT_withPotentialHostGeneDomain	ms587009_SL3.0ch01_DTX-incomp_SL3_120k-B-R5803-Map6
76495418	Cluster_1705	SL3.0ch01	nc_RNA	76494244	76495418	+	N	Solyc01g067740
76495606	Cluster_1706	SL3.0ch01	nc_RNA	76495502	76495606	+	N	Solyc01g067740
76495911	Cluster_1707	SL3.0ch01	nc_RNA	76495684	76495911	+	N	Solyc01g067740
76496386	Cluster_1708	SL3.0ch01	nc_RNA	76496024	76496386	+	N	Solyc01g067740
76498515	Cluster_1709	SL3.0ch01	nc_RNA	76498353	76498515	+	N	Solyc01g067740
76499399	Cluster_1710	SL3.0ch01	nc_RNA	76498616	76499399	+	N	Solyc01g067740
76533550	Cluster_1711	SL3.0ch01	nc_RNA	76532163	76533550	*	24
76555169	Cluster_1712	SL3.0ch01	nc_RNA	76554814	76555169	*	N		PROM_Solyc01g067770
76569912	Cluster_1713	SL3.0ch01	nc_RNA	76569747	76569912	*	24		PROM_Solyc01g067780	Gypsy	ms587235_SL3.0ch01_RYX-incomp-chim_SL3_120k-B-P72.379-Map17
76575634	Cluster_1714	SL3.0ch01	nc_RNA	76575337	76575634	*	24
76576418	Cluster_1715	SL3.0ch01	nc_RNA	76576011	76576418	+	N
76576811	Cluster_1716	SL3.0ch01	nc_RNA	76576498	76576811	*	24			Unclassified	ms115580_SL3.0ch01_noCat_SL3_120k-B-G308-Map20
76578725	Cluster_1717	SL3.0ch01	nc_RNA	76578302	76578725	*	24			Unclassified	ms194241_SL3.0ch01_noCat_SL3_120k-B-R2595-Map11
76580110	Cluster_1718	SL3.0ch01	nc_RNA	76579449	76580110	*	24		PROM_Solyc01g067790
76580403	Cluster_1719	SL3.0ch01	nc_RNA	76580190	76580403	*	24		PROM_Solyc01g067790
76587514	Cluster_1720	SL3.0ch01	nc_RNA	76587327	76587514	-	24			Copia	ms587759_SL3.0ch01_RLX-incomp_SL3_120k-B-R1190-Map8
76587970	Cluster_1721	SL3.0ch01	nc_RNA	76587590	76587970	*	24
76591005	Cluster_1722	SL3.0ch01	nc_RNA	76590357	76591005	-	24	Solyc01g067800
76642964	Cluster_1723	SL3.0ch01	nc_RNA	76642403	76642964	*	24	Solyc01g067850
76648073	Cluster_1724	SL3.0ch01	nc_RNA	76647414	76648073	*	24			EPRV	ms10584_SL3.0ch01_RLX-incomp_SL3_120k-B-R1655-Map20
76663038	Cluster_1725	SL3.0ch01	nc_RNA	76662776	76663038	*	24
76676255	Cluster_1726	SL3.0ch01	nc_RNA	76675575	76676255	*	24
76677021	Cluster_1727	SL3.0ch01	nc_RNA	76676543	76677021	*	24
76679944	Cluster_1728	SL3.0ch01	nc_RNA	76679188	76679944	-	N	Solyc01g067890
76681658	Cluster_1729	SL3.0ch01	nc_RNA	76680927	76681658	-	N	Solyc01g067890
76683448	Cluster_1730	SL3.0ch01	nc_RNA	76683084	76683448	-	N	Solyc01g067890
76696028	Cluster_1731	SL3.0ch01	nc_RNA	76695654	76696028	+	24			EPRV	ms10584_SL3.0ch01_RLX-incomp_SL3_120k-B-R1655-Map20
76700823	Cluster_1732	SL3.0ch01	nc_RNA	76700778	76700823	+	24
76701347	Cluster_1733	SL3.0ch01	nc_RNA	76700950	76701347	*	24			Unclassified	ms115595_SL3.0ch01_noCat_SL3_120k-B-R129-Map5
76717471	Cluster_1734	SL3.0ch01	nc_RNA	76717206	76717471	*	22			Unclassified	ms403940_SL3.0ch01_noCat_SL3_120k-B-R119-Map10
76717471	Cluster_1734	SL3.0ch01	nc_RNA	76717206	76717471	*	22			Copia	ms294728_SL3.0ch01_RIX-incomp-chim_SL3_120k-B-P50.56-Map20
76719542	Cluster_1735	SL3.0ch01	nc_RNA	76719096	76719542	+	22			Unclassified	ms294730_SL3.0ch01_noCat_SL3_120k-B-P71.46-Map20
76719542	Cluster_1735	SL3.0ch01	nc_RNA	76719096	76719542	+	22			Unclassified	ms294729_SL3.0ch01_noCat_SL3_120k-B-P554.115-Map6
76729295	Cluster_1736	SL3.0ch01	nc_RNA	76728270	76729295	*	24
76730121	Cluster_1737	SL3.0ch01	nc_RNA	76729461	76730121	*	24
76732253	Cluster_1738	SL3.0ch01	nc_RNA	76732212	76732253	-	24		PROM_Solyc01g067900
76733675	Cluster_1739	SL3.0ch01	nc_RNA	76732779	76733675	*	24		PROM_Solyc01g067900
76734956	Cluster_1740	SL3.0ch01	nc_RNA	76734133	76734956	+	N
76741220	Cluster_1741	SL3.0ch01	nc_RNA	76740500	76741220	*	24		PROM_Solyc01g067910	Unclassified	ms294738_SL3.0ch01_noCat_SL3_120k-B-R200-Map13
76741220	Cluster_1741	SL3.0ch01	nc_RNA	76740500	76741220	*	24		PROM_Solyc01g067920	Unclassified	ms294738_SL3.0ch01_noCat_SL3_120k-B-R200-Map13
76741220	Cluster_1741	SL3.0ch01	nc_RNA	76740500	76741220	*	24		PROM_Solyc01g067905	Unclassified	ms294738_SL3.0ch01_noCat_SL3_120k-B-R200-Map13
76754084	Cluster_1742	SL3.0ch01	nc_RNA	76752127	76754084	+	N
76770135	Cluster_1743	SL3.0ch01	nc_RNA	76769863	76770135	*	24
76771301	Cluster_1744	SL3.0ch01	nc_RNA	76770807	76771301	*	24
76772217	Cluster_1745	SL3.0ch01	nc_RNA	76771758	76772217	*	24
76774438	Cluster_1746	SL3.0ch01	nc_RNA	76773678	76774438	*	24
76811875	Cluster_1747	SL3.0ch01	nc_RNA	76811460	76811875	*	24
76818712	Cluster_1748	SL3.0ch01	nc_RNA	76818445	76818712	-	24
76845379	Cluster_1749	SL3.0ch01	nc_RNA	76845271	76845379	-	24
76867270	Cluster_1750	SL3.0ch01	nc_RNA	76866440	76867270	+	N	Solyc01g068000
76870256	Cluster_1751	SL3.0ch01	nc_RNA	76869819	76870256	*	24		PROM_Solyc01g068010
76873162	Cluster_1752	SL3.0ch01	nc_RNA	76872663	76873162	*	24
76889784	Cluster_1753	SL3.0ch01	nc_RNA	76889265	76889784	*	24		PROM_Solyc01g068050
76901317	Cluster_1754	SL3.0ch01	nc_RNA	76901195	76901317	*	24		PROM_Solyc01g068065
76903214	Cluster_1755	SL3.0ch01	nc_RNA	76902686	76903214	*	24			Unclassified	ms294739_SL3.0ch01_noCat_SL3_120k-B-R200-Map13
76930666	Cluster_1756	SL3.0ch01	nc_RNA	76930477	76930666	*	24
76931717	Cluster_1757	SL3.0ch01	nc_RNA	76931596	76931717	*	24
76932631	Cluster_1758	SL3.0ch01	nc_RNA	76932219	76932631	+	24	Solyc01g068080
76953105	Cluster_1759	SL3.0ch01	nc_RNA	76951291	76953105	*	22			Unclassified	ms120013_SL3.0ch01_noCat_SL3_120k-B-R2353-Map13
76954435	Cluster_1760	SL3.0ch01	nc_RNA	76953188	76954435	*	22			PutativeNoutoClassII	ms395860_SL3.0ch01_DXX_SL3_120k-B-R2407-Map6
76985635	Cluster_1761	SL3.0ch01	nc_RNA	76984267	76985635	*	22			SAT	ms120202_SL3.0ch01_RXX-TRIM_SL3_120k-B-R725-Map6
76985635	Cluster_1761	SL3.0ch01	nc_RNA	76984267	76985635	*	22			Gypsy	ms120276_SL3.0ch01_RLX-incomp_SL3_120k-B-R1402-Map5_reversed
76987499	Cluster_1762	SL3.0ch01	nc_RNA	76987005	76987499	*	22			TIR_MITEov10	ms590683_SL3.0ch01_DTX-incomp_SL3_120k-B-P119.392-Map20
76987499	Cluster_1762	SL3.0ch01	nc_RNA	76987005	76987499	*	22			Confused_TE	ms197700_SL3.0ch01_DXX-MITE_SL3_120k-B-R2337-Map12
76990871	Cluster_1763	SL3.0ch01	nc_RNA	76989254	76990871	*	22
76992317	Cluster_1764	SL3.0ch01	nc_RNA	76991466	76992317	*	22			TRIM_LARD	ms460332_SL3.0ch01_DTX-incomp-chim_SL3_120k-B-R3849-Map6
76994285	Cluster_1765	SL3.0ch01	nc_RNA	76992657	76994285	*	24
76994964	Cluster_1766	SL3.0ch01	nc_RNA	76994446	76994964	-	21			SSR	ms460483_SL3.0ch01_SSR_SL3_120k-B-R3083-Map5
77006713	Cluster_1767	SL3.0ch01	nc_RNA	77005913	77006713	-	N	Solyc01g068100
77007552	Cluster_1768	SL3.0ch01	nc_RNA	77006792	77007552	-	N	Solyc01g068100
77010178	Cluster_1769	SL3.0ch01	nc_RNA	77009555	77010178	-	N	Solyc01g068100
77013404	Cluster_1770	SL3.0ch01	nc_RNA	77010990	77013404	-	N	Solyc01g068100
77020195	Cluster_1771	SL3.0ch01	nc_RNA	77019685	77020195	*	24			Unclassified	ms591556_SL3.0ch01_noCat_SL3_120k-B-R129-Map5
77021019	Cluster_1772	SL3.0ch01	nc_RNA	77020892	77021019	*	24
77025087	Cluster_1773	SL3.0ch01	nc_RNA	77024261	77025087	*	24
77035241	Cluster_1774	SL3.0ch01	nc_RNA	77034897	77035241	*	24
77036900	Cluster_1775	SL3.0ch01	nc_RNA	77036211	77036900	-	24
77038063	Cluster_1776	SL3.0ch01	nc_RNA	77037720	77038063	*	24
77043441	Cluster_1777	SL3.0ch01	nc_RNA	77042916	77043441	-	24		PROM_Solyc01g068120	Unclassified	ms329528_SL3.0ch01_noCat_SL3_120k-B-R3817-Map10
77049189	Cluster_1778	SL3.0ch01	nc_RNA	77048394	77049189	+	24	Solyc01g068130
77052167	Cluster_1779	SL3.0ch01	nc_RNA	77051939	77052167	*	24		PROM_Solyc01g068130	Unclassified	ms329540_SL3.0ch01_noCat_SL3_120k-B-R2455-Map6
77053956	Cluster_1780	SL3.0ch01	nc_RNA	77053046	77053956	*	24
77057654	Cluster_1781	SL3.0ch01	nc_RNA	77057368	77057654	*	24			TIR_MITEov10	ms198477_SL3.0ch01_DXX-MITE_SL3_120k-B-G372-Map9
77058365	Cluster_1782	SL3.0ch01	nc_RNA	77058102	77058365	*	24		PROM_Solyc01g068140
77084305	Cluster_1783	SL3.0ch01	nc_RNA	77084017	77084305	*	24		PROM_Solyc01g068170
77099517	Cluster_1784	SL3.0ch01	nc_RNA	77099228	77099517	*	24
77100506	Cluster_1785	SL3.0ch01	nc_RNA	77100086	77100506	*	24
77104849	Cluster_1786	SL3.0ch01	nc_RNA	77103952	77104849	*	24		PROM_Solyc01g068190
77162817	Cluster_1787	SL3.0ch01	nc_RNA	77162219	77162817	*	24		PROM_Solyc01g068240
77176036	Cluster_1788	SL3.0ch01	nc_RNA	77175747	77176036	*	24
77179728	Cluster_1789	SL3.0ch01	nc_RNA	77179270	77179728	*	24
77205547	Cluster_1790	SL3.0ch01	nc_RNA	77205015	77205547	*	24
77207559	Cluster_1791	SL3.0ch01	nc_RNA	77207108	77207559	*	24
77217263	Cluster_1792	SL3.0ch01	nc_RNA	77217081	77217263	-	24
77242643	Cluster_1793	SL3.0ch01	nc_RNA	77242499	77242643	+	24			PutativeNoutoClassII	ms198480_SL3.0ch01_DTX-incomp_SL3_120k-B-G828-Map17_reversed
77258389	Cluster_1794	SL3.0ch01	nc_RNA	77257859	77258389	*	24		PROM_Solyc01g068290	Gypsy	ms198554_SL3.0ch01_RLX-incomp-chim_SL3_120k-B-R702-Map10
77258973	Cluster_1795	SL3.0ch01	nc_RNA	77258487	77258973	*	24			Unclassified	ms592015_SL3.0ch01_noCat_SL3_120k-B-R855-Map5
77353165	Cluster_1796	SL3.0ch01	nc_RNA	77353026	77353165	+	24			Unclassified	ms120540_SL3.0ch01_noCat_SL3_120k-B-G308-Map20
77399600	Cluster_1797	SL3.0ch01	nc_RNA	77399242	77399600	*	24	Solyc01g068380		PutativeNoutoClassII	ms199097_SL3.0ch01_DXX_SL3_120k-B-G359-Map20_reversed
77407621	Cluster_1798	SL3.0ch01	nc_RNA	77407229	77407621	*	24			Unclassified	ms120589_SL3.0ch01_noCat_SL3_120k-B-R2553-Map16
77417941	Cluster_1799	SL3.0ch01	nc_RNA	77417559	77417941	*	24		PROM_Solyc01g068390	Gypsy	ms142444_SL3.0ch01_RLX-incomp_SL3_120k-B-R35-Map14
77444061	Cluster_1800	SL3.0ch01	nc_RNA	77443771	77444061	*	24			Gypsy	ms142444_SL3.0ch01_RLX-incomp_SL3_120k-B-R35-Map14
77475595	Cluster_1801	SL3.0ch01	nc_RNA	77475432	77475595	*	24
77479317	Cluster_1802	SL3.0ch01	nc_RNA	77479164	77479317	*	24	Solyc01g068410
77482362	Cluster_1803	SL3.0ch01	nc_RNA	77482235	77482362	+	24		PROM_Solyc01g068420
77490317	Cluster_1804	SL3.0ch01	nc_RNA	77490036	77490317	*	23	Solyc01g068430
77503113	Cluster_1805	SL3.0ch01	nc_RNA	77502477	77503113	*	24	Solyc01g068440
77513989	Cluster_1806	SL3.0ch01	nc_RNA	77511675	77513989	-	N	Solyc01g068460
77513989	Cluster_1806	SL3.0ch01	nc_RNA	77511675	77513989	-	N	Solyc01g068450
77531152	Cluster_1807	SL3.0ch01	nc_RNA	77530949	77531152	*	24		PROM_Solyc01g068480
77545491	Cluster_1808	SL3.0ch01	nc_RNA	77544497	77545491	+	N
77567193	Cluster_1809	SL3.0ch01	nc_RNA	77566547	77567193	-	N		PROM_Solyc01g068520
77569765	Cluster_1810	SL3.0ch01	nc_RNA	77569539	77569765	+	24		PROM_Solyc01g068540
77570156	Cluster_1811	SL3.0ch01	nc_RNA	77570096	77570156	-	24		PROM_Solyc01g068540
77590437	Cluster_1812	SL3.0ch01	nc_RNA	77589560	77590437	*	24		PROM_Solyc01g068560
77591313	Cluster_1813	SL3.0ch01	nc_RNA	77591068	77591313	*	24
77608900	Cluster_1814	SL3.0ch01	nc_RNA	77608262	77608900	+	23
77614911	Cluster_1815	SL3.0ch01	nc_RNA	77614687	77614911	+	N	Solyc01g068590
77645705	Cluster_1816	SL3.0ch01	nc_RNA	77645407	77645705	+	24	Solyc01g068590	PROM_Solyc01g068630
77649580	Cluster_1817	SL3.0ch01	nc_RNA	77649069	77649580	*	24	Solyc01g068630
77649580	Cluster_1817	SL3.0ch01	nc_RNA	77649069	77649580	*	24	Solyc01g068590
77989531	Cluster_1818	SL3.0ch01	nc_RNA	77989020	77989531	*	24
77997655	Cluster_1819	SL3.0ch01	nc_RNA	77996737	77997655	*	24	Solyc01g079060
77998930	Cluster_1820	SL3.0ch01	nc_RNA	77998271	77998930	*	22	Solyc01g079060		PutativeNoutoClassII_withPotentialHostGeneDomain	ms592952_SL3.0ch01_DXX_SL3_120k-B-R6377-Map11
77999669	Cluster_1821	SL3.0ch01	nc_RNA	77999100	77999669	*	22	Solyc01g079060		Unclassified	ms294713_SL3.0ch01_noCat_SL3_120k-B-G308-Map20
78001407	Cluster_1822	SL3.0ch01	nc_RNA	77999801	78001407	*	22	Solyc01g079060
78016110	Cluster_1823	SL3.0ch01	nc_RNA	78015462	78016110	*	24		PROM_Solyc01g079080		ms294713_SL3.0ch01_noCat_SL3_120k-B-G308-Map20-exon2
[truncated: 28,704 more rows]

## Sheet: 4C_ClustersDiff_PHYA-IGvsWT-IG
Supplementary Table 4C. Differential sRNA clusters between PHYA IG x WT IG
Cluster_ID	logFC	logCPM	PValue	padj
193	5.66512	2.90191	1.5673e-10	2.21572e-07
194	5.37019	1.93839	1.53988e-06	0.000670749
268	7.74656	4.91172	1.15635e-12	4.98205e-09
338	6.66604	-0.438468	7.93918e-06	0.00255434
370	-2.99042	-0.089166	2.04545e-05	0.00508006
637	3.58122	-0.225558	0.000137448	0.0215003
646	-3.7683	-1.01637	9.74874e-06	0.00306684
760	-3.6768	1.94941	0.000133632	0.021137
761	-3.74937	1.55743	5.29409e-05	0.0104819
871	-3.14762	4.30413	4.44544e-08	3.06985e-05
940	-2.34692	1.06429	0.000285472	0.0392357
961	6.82191	-0.906884	1.69487e-06	0.000705689
1165	-2.87987	0.692894	5.62248e-05	0.0110548
1282	5.55439	1.16093	8.80263e-09	8.30763e-06
1319	6.06435	3.62199	4.95056e-07	0.000259565
1376	-4.13536	0.83011	7.05988e-07	0.000350678
1533	4.84181	2.83278	2.60604e-07	0.000144676
1537	-3.55351	-0.172802	6.83018e-05	0.0124763
1602	-3.76453	-0.123833	3.83264e-06	0.00132334
1653	-4.03759	-0.267718	6.8703e-08	4.59134e-05
1751	2.2786	-0.630745	5.85204e-05	0.0114256
1960	-2.47258	-0.624985	6.11121e-05	0.0116125
2180	-3.39632	2.61155	0.000123046	0.0197944
2196	8.06892	-0.720223	1.42918e-08	1.20808e-05
2444	-2.42628	0.626932	0.000122712	0.0197944
2783	3.16746	1.39868	0.000109213	0.0179777
2858	4.83853	-0.838945	0.000217698	0.0315188
2962	-3.23069	1.88019	0.000280171	0.038695
3414	5.83623	0.497763	2.09205e-08	1.60087e-05
3602	-6.95066	-0.917053	8.0832e-08	4.97521e-05
3821	8.59028	2.83768	2.6491e-15	7.50041e-11
3822	8.2222	2.68637	1.58367e-12	4.98205e-09
4445	4.63023	-0.491637	2.61555e-05	0.00632941
4446	4.11008	-0.236342	5.40779e-06	0.00178016
4447	4.06435	0.428131	1.50804e-05	0.0041841
4544	-2.59947	-0.441369	1.93805e-05	0.00494313
4613	-4.83102	-0.353515	5.62797e-09	5.69089e-06
4713	5.40993	-0.543053	2.1597e-06	0.000861234
5021	3.1999	-0.811418	0.000218192	0.0315188
5156	-3.55368	0.288713	5.9672e-05	0.0114256
5586	2.42574	0.0834104	0.000204399	0.0301974
5653	-3.49486	1.37711	1.52214e-05	0.0041841
5670	3.7054	-0.817509	4.53082e-05	0.00916293
5763	-2.25213	0.222931	0.000276885	0.0384287
6242	-3.19244	-0.695053	0.000108494	0.0179636
6351	-3.1327	1.08392	1.88213e-05	0.00488887
6402	-3.32719	-0.862422	4.99774e-05	0.0100355
6532	2.93165	-0.252285	0.000194506	0.0292928
6573	-4.1035	1.75086	5.30606e-06	0.00176742
7105	6.54079	-0.554218	3.14525e-06	0.00117173
7106	5.12742	2.62095	1.64342e-10	2.21572e-07
7107	6.3304	1.03596	2.51444e-09	2.84765e-06
7109	4.96441	0.763019	2.95089e-06	0.00112903
7136	-6.35651	-0.610383	3.62838e-13	2.56826e-09
7137	-5.32805	0.476943	1.4934e-08	1.20808e-05
7284	-3.44205	0.00550111	3.39349e-07	0.000181283
7604	5.08094	1.61702	0.00022509	0.0323502
7770	-2.61557	3.21989	0.000200696	0.0299068
7858	-3.47486	-1.00687	9.67276e-05	0.0163015
8009	3.73182	0.941204	0.000214843	0.0313548
8119	2.69191	5.82109	0.000334417	0.0448737
8480	-2.51894	1.32038	0.000249803	0.0351874
8521	4.26751	-0.570796	2.31865e-05	0.00565931
9573	-4.01472	0.0379724	1.27781e-05	0.00380829
9719	-4.36723	1.09301	3.79535e-06	0.00132334
9720	6.93197	3.43769	1.8245e-12	5.1657e-09
9809	-3.77251	2.27383	9.35234e-06	0.0029752
9857	8.32523	0.475323	1.22061e-05	0.00371537
11219	-5.35484	0.156734	1.29239e-10	2.03285e-07
12096	-2.7932	-1.00994	0.000302907	0.041431
12387	4.66509	-0.239247	0.000345637	0.0461604
12668	4.0625	-1.00122	0.000315022	0.0428808
12855	5.16142	-0.559825	7.50953e-05	0.0132886
13092	-3.21369	1.48396	9.29872e-05	0.015765
13588	3.03082	-0.723773	0.000185597	0.0281006
13957	2.97561	3.3376	0.000265914	0.0370878
14576	-2.62511	4.65372	0.000180617	0.0274936
14760	-5.69833	1.31435	1.27934e-08	1.13193e-05
14845	-3.20364	-0.576958	2.92937e-06	0.00112903
14847	-6.2386	-0.225513	6.42626e-13	3.63893e-09
14851	7.35938	-0.100455	1.04985e-05	0.00324041
14866	-2.44621	-0.330612	6.34589e-05	0.0118988
14957	5.78784	1.89042	6.59561e-05	0.0122856
15006	-3.32785	8.71815	0.000323951	0.0438853
15279	-2.91144	4.48218	7.17986e-05	0.012866
15620	6.02411	-0.690985	0.000262391	0.0367776
15740	5.08182	1.059	1.75509e-06	0.000720174
15932	-3.13921	-0.732942	3.21852e-08	2.33657e-05
15984	-4.6061	1.98341	1.94373e-08	1.52869e-05
16435	-4.66647	-0.163204	3.12491e-12	8.04323e-09
16500	3.76135	-0.92057	0.000173792	0.0267133
16519	5.0123	0.457554	1.52538e-06	0.000670749
16547	5.94629	4.05616	3.91092e-11	7.8437e-08
16548	5.13332	1.78278	7.36888e-12	1.60489e-08
16549	6.93772	1.05219	1.47729e-12	4.98205e-09
16550	5.91746	-1.25066	7.31842e-05	0.0130318
16551	4.79626	3.34733	4.87849e-11	8.63279e-08
16552	5.36895	2.60402	1.90869e-09	2.25169e-06
16553	5.028	-0.294854	8.05751e-07	0.000386665
16554	5.92161	-1.13283	5.94348e-05	0.0114256
16555	4.35279	-0.630467	6.25986e-05	0.0118157
16556	6.96273	2.26373	1.43915e-10	2.14456e-07
16623	5.49708	3.56199	4.55616e-12	1.07499e-08
16624	5.56792	4.07617	5.46738e-09	5.69089e-06
16625	3.21242	2.87665	1.46352e-05	0.00417447
16627	3.74453	0.83605	1.23351e-05	0.00371537
16696	3.59764	-0.510855	0.000207828	0.0304882
16958	-4.20091	0.369758	0.000121341	0.0197444
17121	2.98122	0.490214	1.66989e-05	0.00446034
17129	-3.16856	-0.24797	0.000199659	0.0299068
17152	2.40521	-0.528029	0.000375944	0.0497388
17171	2.6973	-0.324463	0.000161109	0.0250631
17180	3.93676	-0.563371	2.89958e-05	0.00678479
17491	4.16264	-0.327096	3.52894e-05	0.0075693
17513	-3.04449	0.370588	3.07071e-05	0.00706838
17675	-5.53497	0.255973	2.68871e-05	0.00642718
18488	-2.29225	-0.3368	0.000134934	0.0212243
18496	6.7526	2.54711	3.01249e-14	4.26463e-10
18527	-3.68554	-0.187473	4.09493e-05	0.00840143
18602	4.15445	0.49555	3.11925e-05	0.00708377
18603	6.9705	2.49746	5.92986e-14	5.5964e-10
18740	-3.42811	0.073475	1.93369e-06	0.000782122
18874	-2.50949	-0.762973	1.6862e-06	0.000705689
19007	5.40187	1.28479	2.12977e-05	0.0052435
19770	-3.78317	-0.871542	0.000234945	0.0334271
20014	3.95378	0.176228	1.03169e-06	0.000478857
20016	5.34234	1.25026	7.70866e-05	0.0135562
20697	6.89232	0.170927	1.50803e-05	0.0041841
20716	7.10542	-0.311497	1.63187e-06	0.000700049
20728	3.78308	-0.300441	3.22364e-05	0.00718669
20739	3.34524	-0.192855	1.74309e-05	0.00461235
20753	6.37953	-0.706322	1.05293e-05	0.00324041
20759	3.09674	-1.02709	7.16682e-05	0.012866
20766	3.30841	-0.93476	6.75743e-05	0.0124763
20789	4.49608	-1.04748	1.36225e-05	0.00397622
20795	4.84508	-0.425936	3.31033e-06	0.00120161
20796	6.22585	1.36492	8.66233e-11	1.44269e-07
20797	2.76867	0.44058	0.000174547	0.0267133
20800	3.38213	-1.07755	4.15795e-06	0.00141836
20808	4.41789	-0.810399	5.47008e-06	0.00178016
20809	4.64128	-0.689334	3.68957e-09	4.0178e-06
20810	5.83205	-1.24281	0.00023454	0.0334271
20811	4.95514	-0.194487	1.2358e-06	0.000555383
20814	8.04645	0.602307	4.15553e-11	7.8437e-08
20832	-2.5389	2.71889	1.9711e-05	0.00494313
20833	5.21426	-0.89948	1.45268e-08	1.20808e-05
20853	8.0638	-0.130033	8.87252e-08	5.34485e-05
20869	-2.44413	-0.804858	3.6831e-05	0.00779535
20871	-2.82729	1.10884	4.46867e-05	0.00910227
20874	3.75639	0.395282	5.97249e-05	0.0114256
20888	3.27597	-0.98736	6.81356e-05	0.0124763
20899	4.96734	-0.683088	3.42575e-05	0.00751886
20921	7.3875	0.0227634	4.84693e-10	6.23777e-07
20927	7.345	-0.171186	1.20843e-07	7.12797e-05
20937	4.18426	-0.96379	0.000170689	0.0264083
20939	4.27089	-0.955097	3.0677e-06	0.00115808
20951	7.47137	-0.0210634	3.39467e-08	2.40283e-05
20961	3.35798	-0.390169	1.40953e-05	0.00407224
20966	3.72174	-0.908083	5.18041e-06	0.00174611
20967	4.99809	0.334997	2.16245e-07	0.000122451
20968	5.96285	-1.19916	7.16916e-05	0.012866
20969	4.80842	-0.968069	1.97285e-05	0.00494313
20974	3.05337	0.230228	5.08397e-05	0.0101368
20975	3.45129	0.458094	3.17768e-05	0.00714045
20977	4.64584	-1.01037	3.45493e-05	0.00752457
20983	-3.308	-0.321574	6.98875e-07	0.000350678
20995	4.96445	-0.85262	3.68939e-05	0.00779535
21001	4.59874	0.85723	2.59999e-06	0.00102241
21017	3.21433	-0.253274	0.000132422	0.0210633
21021	3.87389	-0.566356	3.12744e-05	0.00708377
21024	4.41702	-0.75379	8.57041e-05	0.014796
21033	6.1198	-0.59286	1.87067e-05	0.00488887
21034	5.78466	-0.341566	7.32457e-07	0.000357552
21044	3.09487	-0.0833805	2.70136e-05	0.00642718
21045	5.92821	1.28249	1.01248e-08	9.24718e-06
21051	4.51212	-0.662523	3.25132e-06	0.00119551
21052	6.98502	-0.710702	1.44005e-07	8.32086e-05
21066	-5.96218	-0.0460444	1.48626e-12	4.98205e-09
21080	3.55613	-0.248316	8.6766e-05	0.0147988
21090	3.97059	-1.22115	0.000204779	0.0301974
21092	4.25155	-1.11603	3.71081e-06	0.0013133
21098	-2.1233	-0.837359	3.33782e-05	0.0073831
21104	8.40771	0.463681	7.90189e-09	7.71469e-06
21115	3.43976	-0.340628	1.33189e-05	0.0039281
21137	5.27809	0.14416	7.8319e-08	4.92766e-05
21138	6.84603	-0.586687	5.05128e-07	0.000260031
21147	3.88648	-0.584002	0.000112469	0.0184065
21152	5.4986	0.226466	1.17271e-06	0.000535532
21161	4.04189	1.15027	7.83982e-05	0.0137018
21222	4.23117	-0.618124	0.000237965	0.0336875
22472	6.75693	0.191501	4.01336e-05	0.00830572
22668	2.3573	-0.44566	0.000129474	0.0207107
22722	-3.94867	-0.612961	2.79833e-08	2.08497e-05
22982	5.21014	-0.0438189	9.76015e-07	0.000460565
23033	6.51895	-0.818336	1.58686e-05	0.00432008
23376	-4.64022	-1.03811	3.12204e-07	0.000169989
23456	-3.86305	0.00243371	8.03747e-05	0.013961
23481	-2.97609	-0.653674	9.7806e-05	0.0163857
23585	-2.6314	-0.584011	3.97372e-05	0.00830572
23759	6.10667	0.000302507	1.4744e-05	0.00417447
23763	-4.15113	0.913381	6.97304e-08	4.59134e-05
23941	-2.8801	2.45608	4.01895e-05	0.00830572
24206	5.82543	-1.06329	9.97909e-05	0.0166199
24209	4.51144	-0.0154059	2.85376e-05	0.00673321
24328	6.7556	-0.605143	7.56134e-08	4.86555e-05
24382	-3.56659	-0.730387	8.67062e-05	0.0147988
25146	5.83901	0.48774	3.48258e-05	0.00752689
25245	-2.47018	1.44721	0.000371409	0.0493695
25812	-5.11235	1.71364	9.64855e-10	1.18774e-06
27008	-2.84156	-0.0985265	3.57866e-06	0.00128256
27021	-4.17783	-0.752122	0.000329711	0.0444528
27087	3.92149	-0.255991	1.64202e-05	0.00442766
28004	6.40658	2.60073	2.99502e-05	0.00695066
28273	-2.23453	-0.303579	1.93024e-05	0.00494313

## Sheet: 4D_ClustDiff_PHYB1B2-IGvsWT-IG
Supplementary Table 4D. Differential sRNA clusters between PHYB1B2 IG x WT IG
Cluster_ID	logFC	logCPM	PValue	padj
193	6.20926	2.90191	4.40939e-12	4.62381e-09
194	5.53989	1.93839	5.98486e-07	0.000166127
268	7.95098	4.91172	3.96183e-13	5.60857e-10
333	2.03665	0.237744	0.000205715	0.0191592
337	-3.21734	5.77514	2.81098e-05	0.00403505
370	-3.69162	-0.089166	1.65869e-07	5.2767e-05
515	-2.66306	1.57048	0.000381597	0.0300116
637	4.18004	-0.225558	4.50846e-06	0.000905304
751	-2.34529	-0.537072	0.000311159	0.0257597
825	-3.11164	1.95602	4.32763e-05	0.00564646
882	-2.92247	-0.198679	5.78365e-05	0.00711967
946	-2.41613	1.54557	0.000116372	0.0122485
961	6.79335	-0.906884	3.89022e-05	0.00526257
1140	-2.75372	5.23857	0.000463383	0.0345257
1144	-3.65472	2.01144	0.000180207	0.0174673
1146	-2.78378	8.87561	0.000428433	0.0322612
1165	-2.76654	0.692894	6.19877e-05	0.00751785
1178	-2.71506	5.4165	0.000445725	0.0333858
1213	2.83161	-1.01392	2.74062e-05	0.00395894
1281	4.41082	-0.958944	5.65716e-09	2.83335e-06
1282	6.88816	1.16093	8.15039e-14	1.44226e-10
1319	4.22636	3.62199	0.000150433	0.0151573
1479	-3.35365	9.9287	0.00017145	0.0167389
1533	5.38066	2.83278	1.84232e-08	7.45164e-06
1898	1.84577	-0.982345	0.000548864	0.0386567
1974	-3.24526	2.47616	0.000407271	0.0314198
2369	-3.47839	0.200911	0.000565259	0.0395663
2388	-3.8592	-0.53852	1.10865e-07	3.82797e-05
2461	-6.19381	-0.241733	0.00034894	0.027956
2519	-2.56254	0.653345	0.00028281	0.0239737
2721	-3.0835	-0.599138	0.000107435	0.0114785
2805	-7.08064	-0.579437	2.18439e-06	0.000498763
2962	-3.47514	1.88019	9.93111e-05	0.0108146
3001	-3.05438	0.676902	0.000197956	0.0185745
3018	-2.55126	3.1566	0.00042085	0.0319941
3102	-3.51829	-0.370065	0.000132643	0.0137565
3134	-3.74427	1.92579	0.000522154	0.0375943
3203	-2.86646	0.254154	0.000624092	0.0427843
3244	-2.88347	0.0276906	1.29772e-05	0.00214867
3417	6.13522	-0.42849	7.80149e-14	1.44226e-10
3578	-2.71306	-0.0413824	0.000379379	0.0299399
3637	-2.59096	-0.256339	0.000541868	0.0385475
3718	-1.8969	-0.640987	0.000546523	0.0386567
3821	9.16627	2.83768	1.08849e-16	7.63112e-13
3822	9.30215	2.68637	1.8708e-15	7.56684e-12
3839	-2.35657	1.98358	0.000772392	0.0487054
3858	-3.66812	0.877434	0.000234725	0.0210309
4158	-2.37496	2.6284	0.000565972	0.0395663
4283	-4.90346	-0.559298	6.90732e-07	0.000184497
4324	5.35985	-0.329737	7.56407e-11	5.77094e-08
4336	7.48117	-1.49256	3.36595e-06	0.000716543
4445	5.18553	-0.491637	3.337e-07	9.8249e-05
4446	5.02337	-0.236342	7.66555e-10	4.71815e-07
4447	4.68607	0.428131	4.64047e-07	0.000132713
4509	-2.78837	0.416843	2.36333e-05	0.00352174
4544	-3.04306	-0.441369	1.60639e-07	5.16838e-05
4613	-9.14547	-0.353515	1.23817e-14	3.50564e-11
4628	4.73836	-1.05128	2.27467e-07	6.92501e-05
4713	4.34884	-0.543053	0.000226488	0.0205531
4757	3.59322	2.07913	3.09611e-05	0.00431823
4909	-3.70833	-0.729535	1.27117e-08	5.29274e-06
4932	-2.27369	6.46181	0.000228908	0.0207063
5021	3.1992	-0.811418	7.70059e-05	0.00893553
5026	-2.11192	-0.55366	0.000414575	0.0317649
5029	-5.05442	0.897404	2.86836e-07	8.54862e-05
5030	-2.43808	-0.567001	1.65885e-05	0.00260928
5035	-2.20565	0.335158	0.000109833	0.0116468
5088	-4.84294	0.27093	1.37233e-05	0.00223303
5131	-5.53321	2.23567	1.25098e-07	4.25817e-05
5353	-3.48466	-0.328267	0.000209845	0.0194161
5371	-2.56895	0.0964254	0.000631769	0.0431019
5515	-3.12991	1.66251	0.00024517	0.0215714
5586	2.26036	0.0834104	0.000493369	0.0362013
5599	-2.95878	-0.302007	0.00025578	0.0222144
5653	-3.67713	1.37711	2.99033e-06	0.000641403
5660	3.17497	-1.04545	0.000330042	0.0267549
5670	3.23808	-0.817509	0.000268288	0.0229757
5705	-2.50597	2.23403	0.000576126	0.03998
6010	-2.76875	0.372763	0.000470877	0.0349003
6190	-3.99888	5.2486	2.71637e-06	0.000591605
6233	-3.18197	1.82188	0.000349153	0.027956
6285	-3.28634	-0.443598	2.30933e-06	0.00051892
6337	-4.4206	0.466817	4.32854e-06	0.000875385
6351	-4.20694	1.08392	5.94165e-08	2.15674e-05
6531	-3.28841	-0.122048	7.00379e-05	0.00830134
6573	-4.49372	1.75086	6.21661e-07	0.000170884
7104	-2.0597	0.290373	0.00037652	0.0298611
7105	8.24483	-0.554218	7.83932e-10	4.72244e-07
7106	6.03416	2.62095	1.59017e-13	2.64838e-10
7107	7.02003	1.03596	4.70184e-11	3.69787e-08
7108	7.31837	-1.42604	1.20604e-05	0.00205702
7109	6.17864	0.763019	4.06685e-09	2.09354e-06
7136	-4.31771	-0.610383	4.92937e-13	6.34387e-10
7137	-6.90326	0.476943	2.28495e-11	2.0869e-08
7284	-3.64356	0.00550111	5.59043e-08	2.05561e-05
7288	-3.25976	0.640733	9.24633e-05	0.0102663
7304	-4.33498	-0.271715	0.000640581	0.043598
7327	-2.43791	1.58069	0.000232858	0.0209299
7337	-1.73348	2.17779	0.000418154	0.0319115
7499	-2.90924	-0.00893645	5.22001e-05	0.00656863
7784	2.10845	-0.957967	0.000220182	0.0201097
7843	-3.04676	2.28507	1.9892e-06	0.000465456
7856	-2.67191	-0.0880394	0.000100675	0.0108794
7875	-3.17282	1.02144	3.04997e-05	0.00427493
7958	-2.50321	-0.55578	0.000757477	0.0483028
8190	7.49103	-1.03559	3.20061e-08	1.24135e-05
8267	2.88403	-0.660522	0.000571173	0.0397337
8287	-3.13123	0.203986	0.000180762	0.0174673
8480	-3.10925	1.32038	8.73748e-06	0.00161264
8517	-2.61226	1.57094	0.000330739	0.0267549
8521	3.97364	-0.570796	9.54551e-05	0.010516
8688	-3.30642	1.3422	0.0007038	0.0463334
9193	-2.02154	-0.00320701	0.000349537	0.027956
9227	-3.69921	-0.661669	0.000194533	0.0184826
9272	-3.0079	0.129249	0.000295863	0.0248569
9519	2.09408	-0.891947	4.95873e-05	0.0062958
9669	-3.01905	-0.333683	0.00070917	0.0463712
9712	-2.2076	4.08002	0.000731122	0.0471709
9719	-8.15755	1.09301	2.83125e-11	2.48854e-08
9720	7.65772	3.43769	1.02874e-14	3.23631e-11
9743	-2.59331	0.761639	0.000214216	0.019756
9773	-3.06919	-0.273949	1.25307e-05	0.00211056
9808	-2.24978	2.57539	0.000174449	0.0169731
9809	-11.5991	2.27383	6.7473e-16	3.18394e-12
9909	-2.86324	-0.214786	0.000297904	0.0248704
10100	-2.51947	1.91867	0.000386343	0.030217
10168	-2.57017	2.82428	8.19654e-05	0.00935761
10273	-3.2863	1.05099	0.000106859	0.0114603
10404	-2.66633	0.394165	0.000193763	0.0184826
10814	-2.87375	-0.602008	5.45773e-05	0.0067774
10839	-3.13487	4.21609	0.000665836	0.0444778
10863	7.93533	-1.20638	3.87194e-05	0.00526257
11219	-6.13751	0.156734	3.4231e-14	8.07652e-11
11252	-3.16224	1.9421	8.8854e-06	0.00161264
11289	-2.10354	-0.656956	1.15966e-05	0.00199719
11322	2.36301	-1.18638	0.000250294	0.0218722
12097	-2.8125	-0.424169	0.000186968	0.0180055
12177	-4.10499	-0.218939	7.80047e-05	0.00897783
12218	-2.50328	-0.781318	9.23902e-06	0.0016556
12254	3.18896	1.16407	3.40968e-05	0.00473226
12256	2.64688	-1.15908	0.000328786	0.0267498
12257	3.11733	-0.745127	9.78065e-05	0.0106919
12259	2.71337	-0.0510692	0.000508106	0.0369091
12262	4.3209	-0.443989	2.0453e-05	0.00314721
12263	4.01135	-0.877492	2.23874e-05	0.00337157
12273	-2.34873	2.17647	0.000108159	0.0115124
12314	2.56993	-0.602425	0.000251982	0.0219519
12316	-1.89616	2.71452	0.000520339	0.0375825
12317	-2.14896	1.89933	0.000313956	0.0259156
12340	-2.93978	0.130503	0.000713277	0.0464268
12410	7.00016	-0.59165	0.000652899	0.0440131
12430	-1.9014	2.10731	0.000426107	0.0321716
12548	-2.96958	-0.173317	0.000245328	0.0215714
12780	-3.01442	-0.149748	0.000294721	0.0248346
12920	7.76458	-1.26202	0.000769855	0.0487054
13168	-3.00036	0.892946	0.000242551	0.0215278
13283	-4.0426	0.756307	8.43294e-07	0.00021318
13383	-2.61258	-0.152005	4.2697e-06	0.000869699
13384	-2.56228	-0.323198	0.000164405	0.0163326
13460	-2.13618	1.04479	0.000628372	0.0429737
13801	2.35561	-0.833612	0.000104543	0.0112545
13825	-7.7322	-0.389306	0.000530227	0.0380059
13955	-2.45123	7.21075	0.000523158	0.0375943
13956	-2.36957	6.84662	0.000738033	0.0473831
14459	-2.34815	2.51089	0.000714391	0.0464268
14589	-3.59904	-0.181845	2.56273e-05	0.00374013
14609	3.29195	-0.96052	6.23987e-05	0.00751785
14728	-3.86645	-0.279892	7.35603e-05	0.00857589
14755	-3.57247	0.0536499	5.40569e-05	0.00677219
14760	-7.14005	1.31435	7.63566e-12	7.72102e-09
14845	-2.56119	-0.576958	3.90329e-05	0.00526257
14847	-4.53626	-0.225513	3.44241e-11	2.78471e-08
14851	7.17383	-0.100455	3.82472e-05	0.00523137
14882	-2.20273	-0.863539	0.000298511	0.0248704
14920	-2.97937	0.948444	0.000194111	0.0184826
14949	4.02559	-0.0770956	4.16474e-08	1.57222e-05
15230	-2.74009	1.20273	0.00064624	0.0438777
15403	3.69572	-1.57322	0.000434672	0.0326442
15404	8.76597	1.4306	1.13998e-08	4.96039e-06
15620	8.25851	-0.690985	1.26333e-07	4.25817e-05
15664	-2.73023	-0.43816	0.000774678	0.048741
15740	4.17676	1.059	4.64428e-05	0.00597698
15932	-3.00198	-0.732942	1.20022e-08	5.07189e-06
15984	-7.59317	1.98341	1.52426e-14	3.92331e-11
16011	-3.09109	2.24986	1.01057e-05	0.00177717
16012	-3.24973	2.50734	6.93247e-06	0.00132621
16078	-2.95186	-0.71453	0.000690709	0.0457987
16100	-5.18423	0.278779	1.42852e-10	1.03707e-07
16101	-6.52218	0.0388774	5.83175e-06	0.00113092
16341	-3.99113	11.3207	7.93255e-06	0.00148738
16435	-8.00575	-0.163204	1.14857e-20	3.25194e-16
16436	-2.87604	0.165682	1.22604e-05	0.00207862
16450	-2.60915	-0.467549	0.000132379	0.0137565
16500	3.83565	-0.92057	8.92769e-05	0.0100705
16519	4.23565	0.457554	4.64292e-05	0.00597698
16538	2.84975	-0.57727	0.000240123	0.0213793
16544	-5.33549	2.16644	7.75897e-05	0.00896652
16547	6.73215	4.05616	3.70061e-13	5.5145e-10
16548	5.62079	1.78278	3.76726e-14	8.20481e-11
16549	7.1908	1.05219	2.80122e-13	4.40616e-10
16550	7.23251	-1.25066	7.8722e-07	0.000202623
16551	4.40243	3.34733	6.92508e-10	4.35711e-07
16552	6.08272	2.60402	3.40498e-11	2.78471e-08
16553	6.08655	-0.294854	1.84593e-10	1.3066e-07
16554	7.44717	-1.13283	9.03235e-08	3.1572e-05
16555	5.76063	-0.630467	3.6581e-09	1.918e-06
16556	7.81396	2.26373	1.27456e-12	1.5036e-09
16559	-2.54619	0.72308	0.00024632	0.0215915
16623	6.44144	3.56199	2.75746e-15	9.75901e-12
16624	6.03537	4.07617	4.35455e-10	2.86722e-07
16625	4.2704	2.87665	2.28173e-08	8.97258e-06
16626	7.30916	-1.27829	3.61208e-05	0.00498872
16627	3.62286	0.83605	1.39972e-05	0.00225172
16696	3.53089	-0.510855	0.000112313	0.0118654
17020	-3.41521	-0.569319	0.000752206	0.048075
17063	-2.5039	1.49958	0.000157088	0.015716
17121	3.15278	0.490214	3.53697e-06	0.000747331
17129	-3.7204	-0.24797	8.74482e-06	0.00161264
17171	2.96295	-0.324463	1.43239e-05	0.00229126
17180	3.72522	-0.563371	4.27751e-05	0.00562983
17182	4.14095	-1.25172	8.86753e-06	0.00161264
17373	-4.30619	0.920765	1.04644e-05	0.00182252
17491	3.79369	-0.327096	0.000134532	0.0138509
17492	2.488	0.0926577	0.000704835	0.0463334
17570	2.75352	0.454143	0.000258355	0.0223694
17957	-2.84725	0.162235	0.000207454	0.0192578
17964	3.59138	-1.08644	2.14564e-05	0.00328375
18022	3.6973	-1.02698	3.79268e-08	1.45111e-05
18428	-3.81582	0.0188017	0.000140415	0.0143522
18488	-2.24878	-0.3368	8.86085e-05	0.0100351
18496	7.6822	2.54711	3.81518e-18	3.60064e-14
18527	-3.70997	-0.187473	2.3678e-06	0.000527871
18570	-2.56681	-0.060053	9.6056e-05	0.0105412
18602	5.45181	0.49555	5.70413e-09	2.83335e-06
18603	8.3579	2.49746	1.2442e-18	1.76135e-14
18633	-2.76852	4.53841	5.18558e-05	0.00655443
18648	2.21971	1.49852	0.000229766	0.0207177
18652	-3.94875	0.315486	0.000142881	0.0145518
18738	-2.56388	13.5832	6.4259e-05	0.00770918
18874	-1.48619	-0.762973	0.000518318	0.0375323
18909	-4.1276	3.14013	2.30613e-06	0.00051892
19298	-2.63468	9.19696	0.000197348	0.0185745
19360	-3.08505	0.377862	8.10912e-05	0.00929529
19555	4.37628	-1.31997	0.000569372	0.039706
19633	7.91439	-0.522483	1.24058e-06	0.00030543
19655	-2.2292	0.515302	0.000705318	0.0463334
19922	-3.90667	0.863606	0.000328592	0.0267498
19993	-3.50527	0.601213	2.08638e-07	6.42084e-05
19994	-3.46218	-0.098755	2.02701e-09	1.10367e-06
20014	4.17221	0.176228	1.8762e-07	5.83746e-05
20016	5.51291	1.25026	3.9448e-05	0.00529333
20157	-3.02861	1.22098	0.000665295	0.0444778
20197	-3.95496	0.432489	0.00029866	0.0248704
20311	4.10198	-1.01056	2.91941e-05	0.00411231
20372	-8.92787	0.634429	7.74541e-11	5.77094e-08
20385	7.5811	-0.992981	6.34788e-07	0.000172815
20416	1.84774	-0.572989	0.000672028	0.0446646
20498	5.12205	-0.594242	5.44068e-05	0.0067774
20616	-2.95786	2.13439	0.000260065	0.0224488
20697	5.82249	0.170927	9.34553e-05	0.0103359
20716	7.86736	-0.311497	6.85248e-07	0.000184497
20728	4.2971	-0.300441	1.48488e-06	0.000356284
20731	3.48351	-1.04998	0.000496196	0.0362082
20739	3.85625	-0.192855	2.5041e-07	7.54241e-05
20753	7.81525	-0.706322	4.62543e-08	1.72315e-05
20759	3.49039	-1.02709	4.94498e-07	0.000138621
20763	2.68369	0.126542	0.000592042	0.0408841
20765	3.76611	-0.10902	2.16516e-05	0.00329581
20766	3.42923	-0.93476	1.33296e-05	0.0021942
20769	2.47459	-0.757631	0.00041511	0.0317649
20770	2.98646	-0.115815	0.000371829	0.0295719
20772	2.22046	-0.356028	0.000421495	0.0319941
20777	2.97189	-0.457115	0.00053558	0.0382926
20787	2.01498	-0.992854	0.000383736	0.0300962
20789	4.40851	-1.04748	3.65483e-05	0.00502327
20795	5.65607	-0.425936	1.09239e-08	4.88743e-06
20796	5.34407	1.36492	1.10478e-08	4.88743e-06
20800	2.89169	-1.07755	5.74824e-05	0.00710699
20808	5.28605	-0.810399	5.77408e-10	3.71549e-07
20809	3.61802	-0.689334	1.60312e-05	0.0025357
20810	7.2922	-1.24281	3.69976e-06	0.000764609
20811	6.05395	-0.194487	2.03542e-10	1.40558e-07
20813	3.09733	-0.912906	9.05264e-06	0.00163253
20814	9.32831	0.602307	4.92878e-14	9.96774e-11
20824	4.19086	-0.766611	1.26724e-05	0.00211056
20829	2.43321	-0.612558	4.25061e-05	0.00562371
20832	-2.53512	2.71889	1.53534e-05	0.00244213
20833	4.72329	-0.89948	8.29389e-07	0.000211554
20834	3.76846	-0.974973	7.35473e-06	0.00138823
20835	2.1137	-0.992848	0.000740318	0.0474222
20847	-2.6309	1.09407	0.000585195	0.0405101
20853	7.79493	-0.130033	5.00141e-06	0.000976586
20861	2.83061	0.315598	0.00016695	0.0164791
20869	-1.47494	-0.804858	0.00047698	0.0351686
20871	-2.47013	1.10884	0.000197121	0.0185745
20874	3.94247	0.395282	2.53059e-05	0.00372293
20880	3.92122	-1.28594	4.14054e-05	0.00550381
20886	-1.99677	1.91892	0.000424545	0.0321394
20888	3.16399	-0.98736	9.14354e-05	0.0101922
20890	4.21792	-0.806282	2.53779e-05	0.00372293
20899	4.74398	-0.683088	6.68018e-05	0.00798042
20921	8.59579	0.0227634	1.55262e-12	1.75837e-09
20927	8.40313	-0.171186	5.83768e-09	2.8497e-06
20931	2.6653	-1.12409	0.000772221	0.0487054
20937	4.58984	-0.96379	2.68277e-05	0.00389525
20939	3.68476	-0.955097	7.3471e-05	0.00857589
20951	8.49575	-0.0210634	1.44323e-09	8.17241e-07
20960	-2.41901	3.49452	0.00045608	0.0340712
20961	3.88881	-0.390169	1.4478e-07	4.76645e-05
20963	3.96246	-1.02942	7.3361e-06	0.00138823
20965	-2.2282	1.87206	0.00032537	0.026702
20966	2.97159	-0.908083	0.000379629	0.0299399
20967	5.68958	0.334997	1.38133e-09	8.12079e-07
20968	7.43	-1.19916	1.82883e-07	5.75331e-05
20969	4.31697	-0.968069	0.000473521	0.0350047
20974	3.27789	0.230228	1.04924e-05	0.00182252
20975	3.58354	0.458094	1.75829e-05	0.00275041
20977	4.41018	-1.01037	6.23802e-05	0.00751785
20982	2.73463	-0.502693	4.79118e-06	0.00094862
20983	-3.02471	-0.321574	2.05423e-06	0.000476732
20995	4.35762	-0.85262	0.000403614	0.0313083
20996	2.60796	-0.524857	0.000406185	0.0314198
21001	4.81407	0.85723	7.16145e-07	0.000187743
21003	-2.93853	13.8008	0.000390876	0.0304873
21014	2.42977	-0.291327	0.000761005	0.0484187
21017	4.33267	-0.253274	1.09094e-08	4.88743e-06
21019	3.0137	-0.477243	0.000303852	0.0252287
21020	3.00437	-0.508227	0.000652611	0.0440131
21021	3.57846	-0.566356	0.000167043	0.0164791
21024	5.12819	-0.75379	7.1554e-07	0.000187743
21027	2.55491	0.657159	9.01226e-05	0.0101256
21030	2.14782	2.19038	0.000666075	0.0444778
21033	7.74525	-0.59286	7.16085e-09	3.37908e-06
21034	5.39166	-0.341566	3.56741e-06	0.000748179
21035	3.82618	-0.978648	2.85035e-05	0.00405538
21036	3.07063	0.825298	0.000217462	0.0199256
21037	2.96433	4.12982	2.17881e-05	0.00329885
21041	2.49652	1.70671	8.65335e-05	0.00983945
21044	3.38937	-0.0833805	2.40385e-06	0.00052989
21045	6.74162	1.28249	1.95583e-11	1.90949e-08
21047	4.08003	-1.19016	0.000144364	0.0146501
21049	2.38491	-0.499941	7.36037e-05	0.00857589
21051	4.8202	-0.662523	1.41494e-07	4.71307e-05
21052	7.36662	-0.710702	3.366e-07	9.8249e-05
21055	3.2102	0.0283826	0.000594232	0.0409355
21060	3.93613	-1.18839	4.13576e-06	0.00084852
21062	2.93709	0.0249732	4.74485e-05	0.00605576
21064	2.94619	0.4381	6.37968e-06	0.00122876
21066	-6.99506	-0.0460444	1.34763e-16	7.63112e-13
21071	4.69557	-1.03008	0.000148246	0.0149903
21080	4.31664	-0.248316	7.75371e-07	0.000201404
21090	3.51977	-1.22115	0.000606182	0.0416573
21092	4.76114	-1.11603	2.49877e-09	1.33486e-06
21097	3.62706	-0.712674	1.71839e-06	0.000405439
21098	-1.79844	-0.837359	7.05905e-05	0.00832762
21104	8.91763	0.463681	1.32188e-08	5.42411e-06
21105	3.34729	-0.485951	6.2033e-05	0.00751785
21111	2.8294	0.940477	0.000273588	0.0232615
21113	-3.68152	2.95666	1.71765e-06	0.000405439
21122	7.41638	-1.3971	1.59865e-07	5.16838e-05
21124	3.82267	-0.619456	0.00021733	0.0199256
21127	3.35071	-0.723229	6.14779e-05	0.00751785
21130	4.19279	-1.00577	9.51304e-06	0.00169398
21137	6.20961	0.14416	2.9005e-11	2.48854e-08
21138	7.26561	-0.586687	8.86721e-07	0.000222175
21144	3.32729	-1.099	0.000126078	0.0132209
21147	3.82265	-0.584002	9.06809e-05	0.010148
21148	4.94207	-0.981063	4.95134e-06	0.000973524
21149	4.24335	-1.20535	4.295e-05	0.00562983
21150	3.3108	0.0493074	3.6793e-06	0.000764609
21152	4.6089	0.226466	2.51676e-05	0.00372293
21161	3.97957	1.15027	7.00745e-05	0.00830134
21286	2.78561	-0.889016	0.000493544	0.0362013
21416	-7.09338	-0.125734	6.32128e-09	3.03346e-06
21417	-5.93279	-0.377877	7.09356e-08	2.5105e-05
21418	-6.74307	-0.437828	7.84495e-09	3.64121e-06
21427	-6.33062	2.86788	1.31426e-06	0.00031804
21428	-9.44283	2.76268	1.8422e-09	1.02271e-06
21750	-4.25485	-0.472791	1.3883e-05	0.00224612
21932	-5.98083	0.836458	2.41429e-06	0.00052989
21934	-6.61335	-0.684137	1.07931e-06	0.000268057
22132	2.74444	-0.50049	0.000152696	0.0153308
22233	-4.30183	0.711953	8.80277e-06	0.00161264
22281	-3.50115	-0.346093	0.000322067	0.0265078
22427	-3.47128	0.317562	0.000168516	0.0165667
22472	9.42223	0.191501	1.15631e-08	4.96039e-06
22519	5.38527	-1.13617	1.40543e-09	8.12079e-07
22722	-5.12412	-0.612961	1.63062e-12	1.77568e-09
22788	-2.41177	2.65518	0.000133563	0.0138013
22792	-2.32123	4.00687	0.000268603	0.0229757
22793	-2.0703	3.86453	0.000188096	0.0180528
22825	-3.62548	-0.558624	0.00054129	0.0385475
22944	-2.56977	1.92979	1.81339e-05	0.00282101
22982	6.4677	-0.0438189	2.87272e-10	1.93656e-07
23033	7.50556	-0.818336	2.14793e-06	0.000494427
23039	-2.60267	10.0845	0.000768907	0.0487054
23053	2.29756	-0.490659	0.000239482	0.0213793
23321	-2.62198	0.346482	9.98584e-05	0.0108325
23465	4.48391	-0.0547811	4.79234e-07	0.000135685
23532	2.51156	0.677849	0.000269881	0.0230155
23585	-2.62697	-0.584011	1.88947e-05	0.00292331
23661	-3.96428	0.538981	0.000561269	0.0394323
23759	8.91488	0.000302507	4.36832e-13	5.88954e-10
23763	-6.09893	0.913381	7.80695e-13	9.61035e-10
23824	-3.30388	3.3254	1.26693e-05	0.00211056
23950	-3.00318	3.13292	0.000128715	0.0134476
24059	-2.39195	1.02576	0.000290319	0.0245367
24179	-2.08448	1.54669	0.000170221	0.0166764
24181	-2.45396	3.30954	0.000548376	0.0386567
24206	7.54181	-1.06329	6.69119e-08	2.39807e-05
24208	3.93872	-0.411791	0.000261892	0.0225378
24328	8.29407	-0.605143	2.26119e-11	2.0869e-08
24636	-2.3318	5.23392	0.000159829	0.015934
24670	-2.59449	0.507122	0.000668527	0.0445365
24703	-2.54199	0.271573	0.00039462	0.0306947
24861	2.88009	-0.537155	2.87864e-05	0.00407515
24962	-2.14399	0.577982	0.000198124	0.0185745
25002	-2.33788	2.80194	0.00065255	0.0440131
25100	1.82344	2.41034	0.000361995	0.0288709
25114	-2.4432	12.4008	0.000135564	0.0139066
25209	-1.98841	9.05443	0.000736947	0.0473831
25214	-1.9559	8.55375	0.000699206	0.0462538
25236	-2.94269	0.446935	9.76478e-06	0.00172794
25245	-2.38505	1.44721	0.000508407	0.0369091
25361	-2.74378	7.95824	2.82182e-05	0.00403505
25362	-3.0147	2.04502	0.000413105	0.0317649
25369	-2.66437	4.13611	0.000343403	0.0277002
25370	-2.29142	1.13789	0.000717016	0.0464551
25371	-3.08589	15.3584	2.26545e-05	0.00339374
25469	-2.14873	1.69623	0.000245051	0.0215714
25499	3.9003	-0.0955155	4.74827e-05	0.00605576
25501	5.35829	-0.947689	1.1639e-05	0.00199719
25546	-3.2433	-0.0895073	0.000202216	0.0188955
25547	-3.08343	1.25488	4.04245e-05	0.00539876
25574	-2.96442	0.258241	0.000466664	0.0346789
25811	3.54093	-1.0549	1.25858e-06	0.000307191
25905	5.80631	-0.589701	2.96931e-06	0.000641403
25939	-2.55202	-0.555716	0.000708075	0.0463712
25984	4.80242	3.79195	4.2209e-07	0.000121945
26038	2.74898	-0.144291	0.000495857	0.0362082
26048	2.3014	0.786163	0.000731396	0.0471709
26274	-3.63051	-0.35954	1.36909e-05	0.00223303
26670	-2.40164	5.08382	0.000222808	0.0202841
26684	-2.66865	3.06506	0.000327301	0.0267498
26984	-2.54208	1.2239	0.00054658	0.0386567
27008	-2.28565	-0.0985265	4.63297e-05	0.00597698
27026	-4.11711	0.0249795	0.00071494	0.0464268
27087	4.77394	-0.255991	2.2803e-08	8.97258e-06
27115	-2.37847	4.85236	0.000659094	0.0443252
27457	-4.28958	-0.120303	4.56033e-06	0.000909272

## Sheet: 4E_ClustDiff_PHYA-BKvsWT-BK
Supplementary Table 4E. Differential sRNA clusters between PHYA BK x WT BK
Cluster_ID	logFC	logCPM	PValue	padj
193	4.21956	2.90191	1.40787e-05	0.00346617
194	4.70676	1.93839	1.80994e-05	0.00416624
239	-3.79856	-0.306264	1.05524e-05	0.00284542
268	7.96612	4.91172	5.71844e-12	8.09531e-08
366	-2.81399	2.29346	0.000118394	0.0151511
460	-3.7142	-0.413077	2.34483e-05	0.00502949
474	-3.09364	1.33222	0.000301179	0.0292604
554	-2.67565	0.895373	0.000156997	0.0181431
694	4.16272	-0.534702	0.000561577	0.0458212
761	-3.73385	1.55743	0.000253849	0.0265211
825	-2.61515	1.95602	0.000142659	0.0169473
852	-4.2135	-0.49121	1.07861e-06	0.000610776
871	-3.07168	4.30413	1.35039e-07	0.000125899
884	-2.47841	0.152596	0.000292577	0.0286635
1003	-3.39786	4.95287	4.6457e-06	0.00158474
1046	-3.56526	1.36843	4.49199e-06	0.001551
1148	-5.15313	1.04639	1.0285e-05	0.00280194
1162	-2.46657	4.1934	2.76366e-05	0.00567011
1218	-3.12724	2.55448	7.29854e-06	0.00215737
1268	-2.69289	2.13458	0.000218281	0.0232436
1282	6.74044	1.16093	3.21331e-05	0.00649846
1305	-2.86903	1.04124	0.000512375	0.0436954
1307	-3.06111	0.145765	0.000280055	0.0277983
1371	-4.72607	2.7332	4.48702e-06	0.001551
1376	-4.81441	0.83011	3.30204e-05	0.00658385
1485	9.08225	0.805736	0.000124508	0.015808
1487	6.03628	1.09477	0.000365395	0.034031
1533	4.61209	2.83278	1.73509e-06	0.000818761
1544	-4.03991	5.66389	3.73093e-06	0.0014199
1602	-6.49448	-0.123833	1.99526e-05	0.00448348
1653	-5.86442	-0.267718	0.000270795	0.0274803
1712	-2.64407	0.809197	7.31838e-05	0.0108484
2180	-3.51098	2.61155	0.000186385	0.0206945
2196	6.06863	-0.720223	0.000332751	0.0316147
2297	-3.18462	-0.677017	0.000601857	0.0481367
2328	-6.51157	1.83947	8.06852e-08	7.87737e-05
2392	-3.05623	2.29043	8.61599e-05	0.0123117
2497	-2.23432	0.0236217	0.000427745	0.0380841
2706	-4.7141	0.110092	1.6587e-05	0.00388122
2752	4.12857	0.252502	0.000360254	0.0336629
3103	3.42435	0.87516	0.000256773	0.0266301
3174	-3.3745	6.80867	4.09813e-06	0.00150689
3208	-3.49507	-0.616792	1.19947e-05	0.00308732
3261	-2.68461	0.564825	9.93527e-06	0.00278512
3262	-3.21582	0.125486	3.23013e-07	0.000247175
3313	-4.51753	-0.416138	1.2954e-06	0.000654942
3379	3.18062	0.554485	0.000633938	0.049665
3386	-3.19845	3.26964	5.7484e-07	0.000396962
3409	-3.11036	5.20696	1.27794e-05	0.00325967
3413	-3.6868	0.49379	0.000103064	0.0138297
3414	4.8722	0.497763	6.05283e-06	0.00185621
3680	-4.07809	4.75294	1.90401e-07	0.000154023
3702	-2.63713	0.077545	0.000280607	0.0277983
3821	6.53511	2.83768	5.32213e-09	1.25571e-05
3822	5.76745	2.68637	2.1232e-06	0.000946537
3947	-2.8932	5.2647	1.32717e-05	0.00332531
4006	-4.69398	2.6335	8.38931e-09	1.69662e-05
4239	-2.60498	6.64883	8.65338e-05	0.0123117
4296	-2.49366	3.52592	0.000301771	0.0292604
4308	-3.87885	-0.0500317	0.000129858	0.0161804
4352	-4.74837	10.1021	5.56909e-05	0.00904862
4445	5.83438	-0.491637	0.000243525	0.0256418
4496	-2.99534	0.402061	1.37848e-07	0.000125899
4508	-2.59232	2.94797	4.7376e-05	0.0083314
4533	-4.67464	5.55184	8.95397e-05	0.0125502
4605	-2.85633	2.30677	1.60141e-05	0.0038164
4613	-6.99277	-0.353515	4.38303e-07	0.00032657
5180	-2.7478	0.298143	8.1769e-05	0.0118724
5183	-2.97746	0.949516	0.000559833	0.0458212
5232	-4.83617	9.34045	4.52439e-05	0.00815917
5254	-2.40883	-0.470143	0.000215358	0.0231842
5510	-2.83679	6.60634	0.00017913	0.020206
5514	-2.50946	5.3974	0.000559474	0.0458212
5554	4.30682	-0.46225	0.000282517	0.0278708
5610	-4.83567	9.94746	0.000126914	0.0159703
5613	6.96677	-0.644881	0.000369979	0.0341212
5653	-5.88561	1.37711	3.81434e-10	1.79992e-06
5663	-4.74304	5.2441	6.92407e-05	0.0104835
5664	-4.87908	6.92846	3.95976e-05	0.00757519
5724	-2.06166	2.8606	0.000305096	0.0294818
5809	-3.86217	2.71824	3.76126e-06	0.0014199
5898	-2.32669	5.03949	0.000275875	0.0277939
5983	-2.72294	4.23561	7.90532e-05	0.0115971
6046	-2.38671	3.8934	0.000169442	0.0191896
6101	5.45779	-0.691295	0.000623197	0.0491492
6214	-3.03373	-0.0997502	2.44397e-06	0.00106456
6217	-4.35995	4.28891	0.000132933	0.0164355
6453	-2.84336	2.64157	2.44653e-05	0.00520817
6501	-4.04103	1.27743	9.4658e-05	0.0129471
6573	-4.39913	1.75086	2.09875e-06	0.000946537
6710	-3.14806	2.00569	0.000263669	0.0269137
6711	-5.28661	0.850574	6.0971e-06	0.00185621
6714	-3.23549	0.929329	0.000108491	0.0142208
6774	-2.45443	6.25995	0.000543486	0.0455258
6936	-2.95109	0.069841	0.000383051	0.0350982
7060	-4.65169	1.91341	0.00020828	0.022594
7106	4.97622	2.62095	5.70306e-07	0.000396962
7107	7.11681	1.03596	6.63107e-06	0.00199729
7109	7.23982	0.763019	1.18356e-05	0.00307433
7136	-6.25231	-0.610383	1.84642e-05	0.00421594
7137	-8.6798	0.476943	5.03652e-11	3.56498e-07
7176	-2.42708	2.15101	0.000297289	0.0290246
7272	-2.79826	1.62197	3.26e-05	0.00654613
7329	-3.50904	2.31342	7.18949e-05	0.0107135
7337	-1.9044	2.17779	0.000356411	0.0334141
7338	-2.84369	1.53724	2.18989e-05	0.00480638
7420	-4.80715	10.2557	4.50543e-05	0.00815917
7463	-2.64192	0.164815	0.000125954	0.0159202
7467	-3.78438	0.87188	2.55621e-06	0.00108312
7503	2.94102	0.805101	0.000262901	0.0269137
7521	-3.62215	0.854533	4.98441e-06	0.0016287
7522	-2.77021	2.4282	8.58968e-05	0.0123117
7610	3.61879	0.993357	0.00027683	0.0277939
7616	4.4994	1.5923	1.54162e-05	0.00373058
7860	-3.00613	3.15568	1.33939e-05	0.00332649
8162	-3.17661	-0.418315	5.21361e-07	0.000378495
8190	-3.48417	-1.03559	0.000129207	0.0161804
8270	-3.18905	2.70117	1.47054e-07	0.000130111
8360	-4.35523	4.20097	0.000136079	0.016607
8377	-2.60185	3.91574	0.000143058	0.0169473
8659	-4.2775	8.08491	1.88561e-05	0.00427099
8663	7.27918	0.214151	1.61752e-05	0.0038164
8679	-4.76119	8.87887	5.22922e-05	0.00886556
8727	-2.40916	2.98385	0.000385434	0.0352026
9112	-2.22585	0.481064	0.000618458	0.0489117
9386	-2.24539	5.33845	8.52941e-06	0.00246422
9438	-3.41717	3.37789	1.12187e-05	0.00296855
9468	-2.68358	0.143929	0.000262877	0.0269137
9669	-5.20454	-0.333683	7.31493e-06	0.00215737
9702	-3.09588	-0.447649	0.000113079	0.0146192
9708	-4.45124	2.74402	4.20632e-06	0.00151931
9719	-8.49909	1.09301	2.33099e-08	3.14273e-05
9720	5.82526	3.43769	3.58939e-09	1.01627e-05
9809	-10.0303	2.27383	2.61189e-12	7.39504e-08
9850	-6.98684	-0.5776	4.2929e-06	0.00151931
9857	4.99429	0.475323	0.000577957	0.0464878
9913	-2.85008	3.55011	3.88301e-05	0.0074789
10021	-3.49299	0.710948	1.40385e-06	0.000685295
10095	-2.32235	2.51887	0.00021013	0.0227077
10108	-4.79895	9.92113	4.21796e-05	0.0079639
10391	-3.85687	5.70596	1.28023e-08	2.26545e-05
10503	-2.07512	7.49918	0.00055396	0.0457471
10717	3.32581	0.165491	0.000391915	0.035565
10925	-3.89879	1.13235	8.36101e-05	0.0120778
11004	-2.13088	2.54206	0.000314996	0.0302321
11052	-3.18884	6.88922	3.32543e-06	0.0013261
11110	-3.50249	6.58409	5.00467e-06	0.0016287
11219	-6.57261	0.156734	2.2349e-11	2.10922e-07
11275	-2.61901	4.06801	0.000452267	0.0398911
11990	-2.66994	1.49332	0.000130298	0.0161804
11991	-2.75897	2.33909	0.000154	0.0179432
12004	-2.57212	1.48669	0.000184948	0.0206612
12005	-4.33146	0.398567	4.75614e-06	0.00158487
12056	-4.38558	4.00924	7.3521e-08	7.87737e-05
12093	-4.52701	0.452588	6.23532e-07	0.000410761
12170	-2.79477	0.139834	0.000118799	0.0151511
12341	-4.77641	8.42794	6.67601e-05	0.0101623
12483	-4.30754	0.37028	4.26744e-06	0.00151931
12583	-3.0727	0.181004	0.000157774	0.0181587
12698	-2.3371	0.511801	0.000243621	0.0256418
12703	-3.90742	4.81212	7.15675e-05	0.0107135
12854	-2.46375	3.9252	7.95478e-05	0.0116095
12855	7.21021	-0.559825	9.32995e-05	0.0129451
12891	3.72574	1.11101	0.000191196	0.0211458
12905	-4.91119	4.86828	5.62457e-05	0.00904862
13107	-2.55807	6.23312	0.000514315	0.0437291
13362	-4.77804	8.32339	4.37744e-05	0.00812317
13430	-2.54793	4.52193	0.000222645	0.0236095
13742	-3.13176	-0.558664	0.000554207	0.0457471
13808	-4.29068	-0.184484	4.38966e-05	0.00812317
13871	-2.55186	4.62657	0.000427233	0.0380841
13922	-4.82157	8.99113	4.63801e-05	0.00828396
13944	-2.74069	4.84224	8.31805e-06	0.00242793
13956	-2.43799	6.84662	0.00053911	0.0452932
13973	-2.25091	3.76037	0.000197894	0.021717
14151	-3.31076	5.39109	5.28705e-06	0.00170105
14204	-2.95108	2.53222	1.45792e-06	0.000699627
14225	-3.07891	8.24091	6.55745e-05	0.0100357
14262	-3.78705	1.42182	6.65272e-07	0.000413515
14306	-2.26871	1.31822	0.00030693	0.0295582
14529	-3.28907	2.01844	5.80379e-05	0.00913069
14600	-4.82433	9.66316	4.21921e-05	0.0079639
14602	-3.21194	1.87364	6.71836e-07	0.000413515
14642	5.02072	0.900155	0.000610748	0.0485843
14760	-5.86576	1.31435	2.08362e-08	3.10492e-05
14811	-2.94234	1.95552	6.38346e-07	0.000410761
14825	-2.81678	1.20361	0.000391675	0.035565
14830	-3.19518	-0.518287	0.000635	0.049665
14831	3.34289	0.533648	0.000150821	0.0176454
14847	-6.33853	-0.225513	2.57476e-05	0.00539995
14851	7.03389	-0.100455	5.39605e-05	0.00904015
14854	-4.77966	9.4804	4.45092e-05	0.00815917
14855	-4.77731	9.21858	5.15023e-05	0.00883748
14875	-2.64691	5.79538	0.000107272	0.0141925
14890	-2.47634	0.597678	5.66855e-05	0.00904862
14891	3.23807	2.13323	3.85022e-05	0.00746653
14893	-2.95387	1.07889	0.000546453	0.0456393
14960	-4.31487	4.2529	0.00014199	0.0169473
15145	-2.68995	5.60969	1.38435e-06	0.000685295
15198	-4.30201	5.25601	0.000108164	0.0142208
15229	-3.81223	4.87457	1.60903e-05	0.0038164
15279	-2.59734	4.48218	0.000502071	0.0431772
15313	4.40657	0.409301	0.000156396	0.0181431
15323	-2.96183	-0.117353	9.8963e-05	0.0133426
15381	4.93086	0.148229	5.47955e-05	0.00904862
15395	-2.82974	0.0737148	0.000516715	0.0438016
15429	6.34635	1.03909	0.000433894	0.0385105
15464	4.10568	0.918499	0.000168198	0.0191252
15465	-2.19382	1.59358	0.000565212	0.0458533
15519	-2.37486	1.25293	0.000559977	0.0458212
15532	-4.79696	10.5202	4.67039e-05	0.00828396
15636	-4.71552	8.19319	5.21725e-05	0.00886556
15689	-3.05662	4.69341	3.23903e-06	0.0013101
15740	7.76325	1.059	1.06967e-05	0.00285714
15778	-2.88775	4.29384	5.37479e-06	0.00170985
15905	-2.50698	0.451407	0.000110769	0.0144526
15984	-5.41655	1.98341	1.09169e-08	2.06061e-05
15993	-2.47693	1.53964	0.000565724	0.0458533
16100	-4.63307	0.278779	1.1009e-06	0.00061117
16101	-7.25048	0.0388774	0.000166528	0.0190118
16435	-4.46629	-0.163204	3.19364e-07	0.000247175
16495	-2.36425	0.95521	0.00041268	0.0370927
16547	5.82341	4.05616	4.37665e-09	1.12651e-05
16548	4.01947	1.78278	9.45533e-05	0.0129471
16549	6.95724	1.05219	5.82446e-06	0.00181218
16551	4.13715	3.34733	5.54093e-08	6.82089e-05
16552	6.64444	2.60402	6.17191e-09	1.3442e-05
16556	5.79205	2.26373	2.56311e-06	0.00108312
16623	4.48284	3.56199	7.14873e-08	7.87737e-05
16624	6.24048	4.07617	1.63839e-09	5.79848e-06
16625	3.78267	2.87665	1.02628e-05	0.00280194
17059	-2.53457	-0.570156	0.000323619	0.0309548
17181	5.96835	-0.666443	0.000346565	0.032599
17231	3.44988	0.201614	0.000459788	0.0401789
17249	-2.50247	3.16921	9.61759e-05	0.0130288
17355	-2.70782	-0.0622606	0.000184216	0.0206612
17391	-4.4727	5.609	0.000105878	0.0140739
17491	6.014	-0.327096	0.000340716	0.0322632
17513	-3.73323	0.370588	0.000135668	0.016607
17531	-3.91455	5.32	3.71696e-08	4.78356e-05
17752	-4.07963	0.788643	2.1643e-05	0.00478732
18106	-2.56873	-0.0448066	0.000216993	0.0232436
18217	-3.97226	1.26304	8.75138e-07	0.000516204
18262	-2.76124	0.876078	2.76321e-05	0.00567011
18496	5.14554	2.54711	5.99294e-08	7.06992e-05
18527	-4.29109	-0.187473	1.27045e-06	0.000654002
18603	5.84655	2.49746	1.38755e-08	2.31092e-05
18740	-3.55666	0.073475	4.68136e-05	0.00828396
19007	4.86144	1.28479	0.000278859	0.0277983
19011	4.00821	-0.736567	0.000280801	0.0277983
19186	-2.8242	3.60452	3.76713e-05	0.00735578
19187	-2.99203	3.404	5.66988e-05	0.00904862
19188	-3.17998	6.17759	5.68875e-05	0.00904862
19191	-4.06454	2.62255	3.63586e-06	0.00141016
19327	-2.87263	3.93266	1.7915e-05	0.0041576
19348	5.82245	-0.505597	0.000470847	0.0410187
19364	-4.47085	-0.731448	0.000474897	0.0412447
19550	-2.48914	4.83199	0.000326638	0.0311384
19551	-2.89713	7.87396	3.1036e-05	0.00632175
19594	-4.04847	0.0244897	1.18147e-05	0.00307433
19901	-4.4228	-0.336836	9.59749e-05	0.0130288
20014	6.05964	0.176228	0.000610886	0.0485843
20016	8.68084	1.25026	3.46468e-06	0.00136244
20268	-1.83975	0.439288	0.000369718	0.0341212
20323	-3.23503	0.6179	2.09473e-06	0.000946537
20324	-3.08769	0.629569	0.000566929	0.0458533
20611	-4.68579	5.834	5.56217e-05	0.00904862
20650	-3.68368	4.00549	1.20042e-06	0.000641273
20716	5.98561	-0.311497	0.000402628	0.0364205
20796	3.4374	1.36492	5.80484e-05	0.00913069
20797	3.91345	0.44058	9.37289e-05	0.0129451
20814	4.22808	0.602307	0.000134629	0.0165728
20828	4.14736	0.0862201	0.000614276	0.0487171
20832	-3.0033	2.71889	1.07205e-06	0.000610776
20861	3.46604	0.315598	0.000632197	0.049665
20869	-3.58288	-0.804858	1.26991e-06	0.000654002
20874	4.62215	0.395282	7.79902e-05	0.0115007
20921	6.31491	0.0227634	6.02187e-05	0.00935273
20927	5.98744	-0.171186	0.000246437	0.0258421
20951	6.42422	-0.0210634	0.00019943	0.021801
20967	6.17618	0.334997	0.000503249	0.0431772
20974	5.88931	0.230228	0.000204918	0.0223148
20995	6.0707	-0.85262	0.000289013	0.0284126
20996	5.68737	-0.524857	0.000435441	0.038527
21017	6.07678	-0.253274	0.000185355	0.0206612
21030	2.65089	2.19038	0.000255089	0.0265527
21037	2.7114	4.12982	0.000118466	0.0151511
21041	3.06136	1.70671	0.0001397	0.0169031
21045	4.36244	1.28249	2.47906e-05	0.00523804
21049	5.86017	-0.499941	0.000491811	0.042583
21055	6.77417	0.0283826	0.000218373	0.0232436
21066	-5.17894	-0.0460444	1.48993e-09	5.79848e-06
21106	-4.90115	2.73166	2.32791e-08	3.14273e-05
21111	4.94964	0.940477	2.60794e-05	0.00542931
21112	4.32884	1.08448	1.02922e-05	0.00280194
21115	5.82317	-0.340628	0.00034526	0.0325845
21120	3.08724	0.689998	9.01902e-05	0.0125791
21134	3.63205	-0.419641	0.000454772	0.0399874
21137	6.41231	0.14416	5.01982e-05	0.00877321
21152	7.12115	0.226466	3.67489e-05	0.0072255
21161	4.36307	1.15027	8.71946e-06	0.00249368
21571	-5.01188	2.34739	1.87122e-07	0.000154023
21580	-3.06494	4.97333	7.93503e-08	7.87737e-05
21834	-3.09006	0.645689	0.000146504	0.0172115
22016	-3.24664	-0.965653	0.000520895	0.0440242
22161	-3.67209	1.53825	2.61819e-06	0.00109013
22492	-3.83796	1.92361	8.59692e-07	0.000516204
22530	-4.67035	6.70118	6.44934e-05	0.00992392
22766	-6.19518	4.27741	7.35246e-11	4.1634e-07
23035	-2.62835	2.06828	0.000369571	0.0341212
23038	-3.18486	4.86649	2.1396e-06	0.000946537
23052	-2.86526	5.21335	5.45469e-05	0.00904862
23135	-2.9316	1.03654	0.000263102	0.0269137
23321	-2.85859	0.346482	6.0451e-05	0.00935273
23398	-2.46964	2.39047	0.000112561	0.014619
23541	-2.01285	3.73178	8.86597e-05	0.0124887
23650	-2.90503	3.53923	2.30631e-05	0.00502097
23763	-5.40786	0.913381	2.05281e-08	3.10492e-05
23823	-2.97912	0.874464	0.00056845	0.0458533
23872	6.18828	-0.245776	0.000159626	0.0182975
23941	-2.77533	2.45608	0.000264261	0.0269137
24008	-3.20812	3.17888	5.59002e-05	0.00904862
24030	-4.98229	-0.158119	1.6634e-07	0.000142714
24190	-3.63693	1.42537	5.56934e-06	0.00175205
24410	-3.32928	1.16786	4.04242e-06	0.00150596
24604	6.93936	-0.0578698	0.000143748	0.0169581
24638	-2.80224	0.434906	7.05173e-05	0.01062
24706	-2.69264	0.468201	0.00019768	0.021717
25066	-2.61805	2.26088	0.000137618	0.0167226
25141	-3.03726	8.35822	0.000105556	0.0140739
25161	-2.52871	3.2718	5.13729e-05	0.00883748
25245	-2.76022	1.44721	0.000553658	0.0457471
25246	3.7851	1.35794	0.000584139	0.0468519
25457	-2.98818	1.57243	3.36099e-05	0.00665452
25768	-3.09586	1.1356	1.51272e-05	0.00369222
25812	-6.4677	1.71364	3.58743e-09	1.01627e-05
25840	5.70374	-0.641012	0.000550643	0.0457471
25910	5.74141	-0.475293	0.000382332	0.0350982
25929	-3.74902	4.69066	4.75802e-06	0.00158487
26393	-2.26215	1.60277	0.000141153	0.0169473
26433	-4.19499	2.61038	6.24496e-07	0.000410761
26595	5.75799	-0.663992	0.000508815	0.0435229
26703	-2.50699	3.0087	0.000535807	0.0451497
26767	-2.52369	1.60132	5.13609e-05	0.00883748
26768	-3.01949	0.180884	2.80329e-06	0.00115028
26918	6.48974	-0.46922	2.09586e-05	0.00467245
27025	-4.04602	-0.172619	4.25207e-05	0.00797278
27088	-3.65341	3.97897	1.15421e-06	0.000628443
27135	-4.88832	0.355074	1.29618e-05	0.00327668
27230	-4.68984	0.123414	7.762e-08	7.87737e-05
27295	-2.98731	0.740855	9.39205e-06	0.00265917
27365	3.97296	1.41384	0.000497413	0.0429368
27504	-3.5355	1.27566	5.31046e-05	0.00894971
27714	-3.09941	-0.0866978	0.000142979	0.0169473
27746	-2.63247	1.19737	0.000422753	0.0378779
27747	-2.91566	1.74514	2.32313e-05	0.00502097
27809	6.02751	-0.266686	0.000411242	0.0370812
28004	5.86636	2.60073	8.82131e-05	0.0124879
28195	-2.5038	2.72629	0.000457787	0.040128
28261	-3.07906	2.42359	5.87786e-05	0.00919446
28269	5.84396	-0.615754	0.000272181	0.0275224
28281	-4.77097	8.82435	4.48916e-05	0.00815917

## Sheet: 4F_ClustDiff_PHYB1B2-BKvsWT-BK
Supplementary Table 4F. Differential sRNA clusters between PHYB1B2 BK x WT BK
Cluster_ID	logFC	logCPM	PValue	padj
127	3.07506	0.476584	0.000280823	0.0320603
193	5.35857	2.90191	4.12419e-08	4.04875e-05
194	4.5422	1.93839	2.89911e-05	0.00707608
196	6.58396	-0.541776	5.61379e-06	0.00205366
202	-3.50085	1.75117	1.4203e-05	0.00423295
268	8.19147	4.91172	1.64689e-12	1.91104e-08
333	3.55161	0.237744	4.35786e-05	0.00963939
473	3.39129	5.51735	7.97541e-05	0.0142018
507	4.49291	1.18339	0.000230118	0.0277248
530	-3.44459	-0.284181	1.51497e-05	0.00437739
532	-3.58392	-0.175563	1.65975e-06	0.000745911
681	3.09392	-0.295306	0.000211635	0.0261661
1084	-3.18368	0.740497	4.65169e-06	0.00180415
1282	8.21528	1.16093	6.40043e-09	9.53765e-06
1485	8.25155	0.805736	0.000533609	0.0475097
1487	5.76365	1.09477	0.000568065	0.0496408
1533	5.05311	2.83278	1.79158e-07	0.000123092
1544	-3.36948	5.66389	6.98883e-05	0.0131398
1722	3.34127	1.0003	0.000198382	0.0253008
1865	2.79783	0.330012	0.000530393	0.0475097
2040	-2.59666	0.352616	7.22083e-05	0.0133623
2042	-2.33254	3.02156	0.000270633	0.0313444
2128	-2.71904	0.701899	7.66591e-05	0.0139131
2298	-3.22821	2.38776	6.72458e-06	0.00230552
2299	-3.29662	0.712582	4.98091e-07	0.000293801
2300	-3.01409	0.237139	0.000524469	0.0472907
2301	-2.70321	3.60523	4.8927e-05	0.0106282
2302	-2.79301	0.582387	0.000404911	0.0413871
2303	-3.00132	1.67591	3.91871e-05	0.00887604
2328	-6.01072	1.83947	4.34237e-07	0.000269775
2497	-2.92515	0.0236217	4.81188e-06	0.00182087
2597	-3.32785	3.15097	9.9765e-07	0.000504644
2598	-3.42106	1.05879	8.555e-06	0.00275247
2619	-3.75505	1.91773	3.36522e-06	0.00136114
2805	-6.58957	-0.579437	3.25134e-05	0.00773572
2865	-2.72677	1.32722	0.000205235	0.0257832
2866	-3.18804	0.201071	4.91918e-05	0.0106282
3027	-2.86923	0.0275325	1.82516e-05	0.00506625
3073	3.86611	-0.587097	0.000509757	0.0465798
3103	4.36988	0.87516	3.21425e-06	0.00135105
3122	-3.24653	0.052744	0.000128033	0.0194828
3417	7.1455	-0.42849	4.68707e-08	4.28081e-05
3444	-3.41799	0.186531	2.26692e-05	0.00581454
3475	-3.30116	0.32902	7.32154e-05	0.0134607
3547	-2.98906	3.35931	4.24635e-06	0.00169334
3576	-2.63032	1.84124	0.000212705	0.026184
3695	3.84515	0.271423	0.000489423	0.0459033
3702	-2.51184	0.077545	0.00021022	0.0261661
3787	-2.67695	-0.633887	0.000505078	0.0464295
3799	-2.01024	-0.0583139	0.000238385	0.0284785
3821	7.13333	2.83768	1.00954e-10	2.85832e-07
3822	7.18302	2.68637	1.01069e-09	1.90771e-06
3936	-4.48966	0.204682	6.27048e-05	0.0124151
4006	-3.76951	2.6335	1.32536e-06	0.000649793
4097	-2.78128	0.0973194	0.000169695	0.022996
4296	-2.59439	3.52592	0.000183174	0.0240102
4324	7.23397	-0.329737	1.50445e-07	0.000115123
4445	6.5446	-0.491637	5.73331e-05	0.0115948
4446	3.34307	-0.236342	0.000321266	0.0347518
4447	4.00205	0.428131	0.000124102	0.018993
4496	-5.22049	0.402061	3.7498e-13	1.06168e-08
4497	-4.50546	1.46809	7.11731e-11	2.5189e-07
4500	-2.58106	1.66502	7.0542e-05	0.0131398
4605	-2.65029	2.30677	8.4417e-05	0.0147537
4613	-7.11283	-0.353515	4.38303e-07	0.000269775
4642	2.84697	0.0768568	0.000481572	0.0457542
4739	5.87438	-0.708627	0.000417255	0.042299
5046	-2.30857	1.84014	0.000486067	0.0458958
5123	-2.43969	2.79081	0.00012283	0.0189004
5131	-3.62392	2.23567	0.000316368	0.0347184
5180	-2.51088	0.298143	0.000495497	0.0459033
5254	-2.64074	-0.470143	0.000133972	0.0196793
5611	-3.02295	0.114915	8.63471e-05	0.014907
5653	-4.59609	1.37711	9.22076e-08	7.67845e-05
5669	-3.33967	0.0323129	2.4435e-05	0.00606868
5835	-2.62373	1.57766	0.000186859	0.0243803
5841	3.16741	0.46905	0.000325956	0.0349575
6214	-2.23474	-0.0997502	0.000135559	0.0197599
6573	-4.7306	1.75086	4.9341e-07	0.000293801
6710	-3.57736	2.00569	5.23353e-05	0.0107807
6711	-4.65264	0.850574	1.88673e-05	0.00509892
6714	-3.8698	0.929329	6.84011e-06	0.00230552
6715	-3.65621	0.442717	3.48529e-05	0.00802269
6773	-2.90926	3.80414	2.20901e-05	0.00573796
6901	3.6449	-0.0902741	0.000515812	0.0469588
6956	-3.17214	-0.0836994	2.32064e-05	0.00581454
7106	6.0412	2.62095	4.14314e-10	8.3789e-07
7107	8.32833	1.03596	7.48537e-09	1.05967e-05
7109	7.59058	0.763019	3.15819e-06	0.00135105
7136	-3.60807	-0.610383	6.92346e-05	0.0131398
7137	-6.45546	0.476943	3.88721e-10	8.3789e-07
7177	-2.43018	3.80009	0.000522111	0.0472907
7465	-3.71814	2.16355	6.01588e-06	0.00210281
7503	2.98002	0.805101	0.000295379	0.0330985
8148	-2.84709	0.538598	0.000137723	0.0198275
8162	-2.80231	-0.418315	1.94524e-05	0.00514724
8299	-3.40655	0.875132	0.000293527	0.0330985
8385	3.11526	0.6717	0.000337184	0.0358898
8426	-3.31941	-0.125369	0.000256221	0.0302266
8514	-3.27967	1.82693	0.000100886	0.016704
8576	-3.61726	-0.572543	5.09719e-05	0.0106282
8725	-3.15579	2.23103	8.88907e-06	0.00282782
8727	-2.7576	2.98385	5.51183e-05	0.0112271
8756	4.11983	0.402011	1.86413e-05	0.00509892
9112	-3.09878	0.481064	1.93293e-05	0.00514724
9119	-2.59854	3.0721	0.000238135	0.0284785
9144	2.8879	1.10195	0.000510004	0.0465798
9419	-2.11174	0.0670279	0.00036038	0.0377905
9468	-2.84111	0.143929	4.1544e-05	0.0093352
9471	3.73267	1.87642	0.000469905	0.0452531
9719	-8.61974	1.09301	1.95354e-08	2.4048e-05
9720	6.76557	3.43769	1.13436e-11	6.42341e-08
9809	-10.1512	2.27383	2.02491e-12	1.91104e-08
9842	5.60782	-0.620637	0.000372822	0.0388078
10021	-2.75397	0.710948	9.97445e-05	0.0166121
10102	-2.78037	2.37341	4.19357e-05	0.00934901
10503	-2.43995	7.49918	6.17526e-05	0.0123127
10827	-2.78222	0.664391	0.000122494	0.0189004
10836	-3.12403	0.652336	0.0002808	0.0320603
10838	-3.83465	0.553209	0.000210865	0.0261661
10962	-2.68634	0.763729	0.00015708	0.021801
10983	6.35703	-0.0232089	0.000375221	0.0389145
11063	-2.51711	0.591507	0.000276664	0.0318423
11219	-6.65515	0.156734	2.15194e-10	5.53889e-07
11239	-3.54064	1.07769	2.1792e-07	0.000143488
11256	-3.28177	0.243173	6.80554e-06	0.00230552
11275	-3.00076	4.06801	8.09101e-05	0.0143175
11322	5.99443	-1.18638	0.00030219	0.0335525
11398	6.03987	-0.393437	0.000445123	0.0434579
11800	-2.92579	1.35409	0.000122624	0.0189004
11805	-2.97508	2.03276	3.2033e-05	0.00768602
11942	-2.99897	0.192994	0.000161383	0.0221808
11947	4.12485	-0.506128	0.000419397	0.042299
12004	-3.36229	1.48669	1.5366e-06	0.000725094
12005	-3.43654	0.398567	3.35713e-05	0.00792088
12093	-3.21588	0.452588	7.91194e-05	0.0141779
12254	3.15118	1.16407	0.000120963	0.0189004
12262	3.65155	-0.443989	0.000551621	0.0489594
12263	6.57703	-0.877492	0.000119955	0.0189004
12264	2.96807	1.82991	2.29526e-05	0.00581454
12265	2.89125	1.70494	0.000118472	0.0189004
12619	-2.93991	0.0847165	0.000137958	0.0198275
12906	3.28352	1.09578	0.000407231	0.0414745
13083	-3.91292	5.98141	9.81394e-06	0.00308736
13623	3.06208	-0.47565	0.000117535	0.0189004
14204	-3.21817	2.53222	1.72335e-07	0.000121983
14306	-2.42638	1.31822	0.000152637	0.0213941
14309	4.26457	-0.309986	0.000104993	0.017183
14359	-2.26255	1.77822	0.000393607	0.0403775
14421	-2.80935	4.27559	4.84239e-05	0.0106281
14422	-2.81464	4.87975	1.51756e-05	0.00437739
14465	-2.58273	-0.337255	0.000440162	0.0432719
14586	-2.4485	0.167165	0.000533249	0.0475097
14587	-3.19179	0.00105944	0.000120383	0.0189004
14642	5.41267	0.900155	0.000216832	0.0264586
14760	-6.26992	1.31435	3.6769e-09	5.78356e-06
14805	4.01354	0.0642963	0.00019486	0.0250776
14825	-2.82455	1.20361	0.000265426	0.030926
14831	3.3712	0.533648	0.000283326	0.0322161
14847	-3.15275	-0.225513	0.000196525	0.0251775
14851	6.52872	-0.100455	0.000321583	0.0347518
14891	3.04084	2.13323	9.17241e-05	0.0157393
15112	-3.76236	0.416421	0.00012166	0.0189004
15221	3.0669	0.552646	0.000567411	0.0496408
15323	-2.51867	-0.117353	0.000335072	0.0357996
15346	3.35926	0.642864	0.00045018	0.0438005
15404	7.89409	1.4306	1.74456e-05	0.00489046
15519	-2.37577	1.25293	0.000388109	0.0399583
15539	-3.06231	3.22448	0.000260385	0.0305903
15740	7.25259	1.059	9.63609e-05	0.0162397
15861	6.40695	0.170006	3.15399e-05	0.00763239
15984	-5.13385	1.98341	6.69033e-08	5.91948e-05
16100	-5.96016	0.278779	8.65167e-08	7.42287e-05
16101	-5.93374	0.0388774	0.000153846	0.0214573
16117	4.42617	-0.22654	1.11762e-05	0.00343948
16310	-2.28364	0.275323	0.000532359	0.0475097
16435	-4.54858	-0.163204	3.35014e-06	0.00136114
16520	2.42358	0.233894	0.000558593	0.0492823
16547	6.94382	4.05616	5.72753e-12	4.05409e-08
16548	4.94293	1.78278	1.61832e-07	0.000120577
16549	7.76882	1.05219	4.14699e-08	4.04875e-05
16551	4.36959	3.34733	1.32619e-08	1.78802e-05
16552	6.78766	2.60402	2.43185e-09	4.05018e-06
16553	6.03316	-0.294854	0.000573191	0.0497786
16556	6.61831	2.26373	3.5799e-08	3.75399e-05
16615	3.44449	-0.555708	0.000205357	0.0257832
16623	5.42758	3.56199	8.24446e-11	2.59362e-07
16624	6.58625	4.07617	2.4082e-10	5.68196e-07
16625	4.87779	2.87665	2.15563e-08	2.4413e-05
16782	-2.23332	1.79563	0.000432595	0.0429757
17055	-2.02322	7.44498	0.000357699	0.0376488
17121	2.96887	0.490214	0.000294288	0.0330985
17249	-2.53565	3.16921	7.02186e-05	0.0131398
17354	-2.48454	2.75829	7.51484e-05	0.0137269
17355	-3.36841	-0.0622606	4.56562e-06	0.00179537
17551	-3.71767	2.1808	3.4131e-05	0.00797194
17557	-3.26919	0.178378	6.58742e-05	0.0128627
17660	-2.65601	0.264245	0.000436801	0.0430911
17794	-2.85229	2.60352	1.53061e-05	0.00437739
17889	-2.3057	-0.0554187	0.000354647	0.0374669
17890	-2.54669	0.74926	0.000145558	0.0207095
18017	-2.48072	1.7148	6.73551e-05	0.0130618
18018	-2.41365	2.87858	0.000435462	0.0430911
18020	-2.65925	0.113357	0.000570332	0.0496855
18022	6.48095	-1.02698	1.62279e-06	0.000741067
18037	-2.5723	4.49965	4.82342e-06	0.00182087
18088	5.55363	-0.630395	0.000477174	0.045489
18108	-2.37868	1.62547	6.81313e-05	0.0131098
18221	-2.2338	3.6691	0.000173595	0.0232938
18280	-2.981	0.233585	5.76308e-06	0.00205366
18337	6.60123	-0.694166	0.000131089	0.0196377
18372	-4.12176	1.23475	1.82597e-07	0.000123092
18373	-3.83132	0.984703	0.000128679	0.0194828
18374	-4.16201	0.828147	1.08322e-05	0.00337023
18376	-3.1587	0.687934	0.000176838	0.0236171
18496	6.20087	2.54711	6.03042e-11	2.43913e-07
18527	-5.61075	-0.187473	2.29543e-08	2.49964e-05
18580	5.81432	-0.556852	0.000429693	0.0429757
18602	3.60719	0.49555	0.000205807	0.0257832
18603	6.7822	2.49746	5.81684e-11	2.43913e-07
18758	6.26593	-0.385034	8.52238e-05	0.0148033
18984	-2.45996	2.2645	9.58859e-05	0.0162397
18985	-2.18684	5.40393	0.000295884	0.0330985
18987	-2.94868	3.59247	7.25584e-07	0.000402813
19040	-2.08451	2.15447	0.000503523	0.0464295
19056	5.67944	-0.482299	0.000491999	0.0459033
19633	7.33176	-0.522483	1.89096e-05	0.00509892
19732	3.29628	2.54145	5.80274e-06	0.00205366
19956	3.33861	1.68626	0.000431239	0.0429757
20014	6.69567	0.176228	3.58011e-05	0.00817448
20268	-1.96281	0.439288	0.000189601	0.0246086
20372	-5.43041	0.634429	8.47406e-06	0.00275247
20462	3.90894	2.04711	8.27717e-05	0.014556
20716	6.4457	-0.311497	0.000563862	0.0495796
20757	2.77634	0.0572941	0.000296931	0.0330985
20770	4.42453	-0.115815	0.00017957	0.0237578
20811	6.36982	-0.194487	0.000105879	0.0172284
20814	4.91693	0.602307	2.12505e-06	0.000925638
20824	6.21099	-0.766611	0.000486305	0.0458958
20828	4.13458	0.0862201	0.000496111	0.0459033
20832	-2.19809	2.71889	0.000372773	0.0388078
20843	-2.78707	1.5262	0.000217739	0.0264586
20861	3.90216	0.315598	0.000164829	0.0225449
20869	-2.91189	-0.804858	1.34081e-05	0.00403855
20921	6.64886	0.0227634	8.13114e-06	0.00267694
20951	6.30177	-0.0210634	0.000429434	0.0429757
20967	7.08007	0.334997	7.81695e-06	0.00260378
20974	6.76505	0.230228	2.83584e-05	0.00698184
20996	6.11939	-0.524857	0.000474619	0.0453983
21017	6.71836	-0.253274	3.24486e-06	0.00135105
21027	4.86729	0.657159	1.16528e-05	0.00354759
21030	3.06589	2.19038	2.16907e-05	0.00568638
21033	4.27055	-0.59286	5.0082e-05	0.0106282
21036	2.88579	0.825298	0.00055874	0.0492823
21037	3.54446	4.12982	9.98131e-07	0.000504644
21038	3.35372	0.543049	5.25459e-05	0.0107807
21041	4.23705	1.70671	4.60421e-08	4.28081e-05
21045	4.85627	1.28249	1.46972e-06	0.000705293
21049	6.10835	-0.499941	0.000134147	0.0196793
21051	3.74955	-0.662523	0.000262634	0.0307271
21064	3.20495	0.4381	0.000202635	0.0257274
21066	-7.62755	-0.0460444	1.48993e-09	2.63652e-06
21097	6.17678	-0.712674	0.00017011	0.022996
21104	7.35532	0.463681	2.31422e-05	0.00581454
21111	4.8787	0.940477	3.43509e-05	0.00797194
21112	4.37295	1.08448	5.78012e-06	0.00205366
21115	6.15112	-0.340628	0.000419808	0.042299
21134	3.81707	-0.419641	0.000130521	0.0196377
21137	7.08379	0.14416	7.85193e-07	0.000427523
21152	6.02099	0.226466	0.000524175	0.0472907
21161	3.379	1.15027	0.000474192	0.0453983
21351	-2.8172	-0.136287	0.000220968	0.0267361
21378	-2.8226	4.47013	0.000148066	0.020961
21537	3.91035	1.82666	0.000318534	0.0347518
21637	-2.92858	0.627914	6.36004e-05	0.012505
22029	8.15714	0.135515	0.000306987	0.0339521
22257	-3.1566	-0.611628	0.000149388	0.0210429
22472	7.28811	0.191501	7.82476e-05	0.014111
22722	-3.46769	-0.612961	0.00011869	0.0189004
22778	2.38546	3.8264	0.000309781	0.0341277
22882	-2.29335	3.2529	0.000190347	0.0246086
22982	6.41162	-0.0438189	0.000181922	0.023957
23001	3.09296	0.218232	0.000444045	0.0434579
23067	3.74704	-0.707558	0.000136092	0.0197599
23321	-2.86472	0.346482	9.38102e-05	0.0160003
23377	6.34603	-0.0609464	0.000133114	0.0196793
23484	4.38768	-0.208906	0.000491038	0.0459033
23661	-5.51006	0.538981	5.05563e-05	0.0106282
23759	7.05909	0.000302507	8.39002e-07	0.000448201
23763	-5.44924	0.913381	1.48945e-08	1.91685e-05
23767	-3.31088	4.35498	1.67732e-07	0.000121769
23768	-3.21677	2.77258	1.56309e-06	0.000725504
23769	-3.28808	4.07621	2.44164e-07	0.000157114
23770	-3.41831	2.57397	9.93059e-07	0.000504644
23771	-3.50889	1.78523	1.33112e-06	0.000649793
23772	-3.22273	3.75652	1.10014e-07	8.89948e-05
23773	-2.8595	1.25926	5.80195e-05	0.0116504
23774	-3.82714	2.90541	2.06168e-08	2.43218e-05
24012	-4.02269	0.743377	2.05925e-06	0.000910993
24039	-2.52354	2.20326	0.000133311	0.0196793
24777	-2.02345	6.94547	0.000574916	0.0497786
25067	-2.63493	2.36299	0.000380446	0.0393123
25100	2.34509	2.41034	6.85288e-05	0.0131098
25245	-2.98037	1.44721	9.74761e-05	0.0163304
25457	-2.64655	1.57243	0.000144772	0.0207017
25657	3.27235	-0.678768	0.000179429	0.0237578
26048	3.09351	0.786163	0.000159174	0.0219838
26382	-2.27102	5.47439	0.000271232	0.0313444
26393	-2.32948	1.60277	0.000101664	0.016735
26575	4.68699	0.448127	0.00032291	0.0347625
26673	-2.65422	2.01461	1.67172e-05	0.00473314
26703	-2.66332	3.0087	0.000217581	0.0264586
26767	-3.36855	1.60132	1.4671e-07	0.000115123
26768	-3.21313	0.180884	7.20501e-07	0.000402813
26796	-2.24822	4.47595	0.000494562	0.0459033
26798	-2.60177	0.848096	5.04718e-05	0.0106282
26918	6.10286	-0.46922	0.000251477	0.029791
26967	2.89161	-0.28617	0.000578563	0.0499416
27350	3.18206	3.7829	0.000455902	0.0442053
27357	-2.38319	1.44972	0.00045926	0.0443789
27457	-4.63552	-0.120303	0.000320302	0.0347518
27766	2.42233	3.16281	0.000353671	0.0374669
27914	-3.22433	0.583117	5.36571e-06	0.00199894
27915	-2.38534	0.480215	0.000245915	0.0292546
27916	-2.2035	2.49702	1.46091e-05	0.00430861
28026	3.71597	0.29123	0.000170563	0.022996
28211	-2.88822	1.3443	5.10522e-05	0.0106282
28212	-3.32311	3.88863	6.64624e-07	0.00038403

## Sheet: 4G
Supplementary Table 4G. sCTGR differentially methylated (PHYA IG x WT IG)
Cluster_ID	%diff_methyl	FDR
Cluster_14	6.37584	4.76393e-06
Cluster_21	-11.5667	0.0142823
Cluster_22	12.0343	1.86418e-97
Cluster_32	5.92078	1.79866e-07
Cluster_35	10.6387	2.68265e-10
Cluster_36	5.35952	8.02628e-07
Cluster_42	5.77371	0.0316594
Cluster_45	-6.20208	0.00156706
Cluster_49	5.37428	0.00241897
Cluster_51	-6.45751	0.0322156
Cluster_55	-11.9713	0.0032715
Cluster_68	9.58228	0.000210174
Cluster_74	11.0454	3.06765e-16
Cluster_79	6.88114	3.9932e-08
Cluster_80	8.46885	2.85589e-34
Cluster_85	5.74335	0.00111208
Cluster_107	8.88729	1.15527e-36
Cluster_129	5.54404	1.65804e-10
Cluster_142	14.4954	1.95179e-14
Cluster_144	5.61715	6.27319e-09
Cluster_145	6.42613	1.43747e-06
Cluster_147	6.0468	9.59059e-12
Cluster_156	8.73662	0.00225833
Cluster_161	5.85364	1.06355e-11
Cluster_163	5.60099	2.80387e-06
Cluster_164	7.10085	2.11569e-05
Cluster_166	8.00097	2.07688e-14
Cluster_171	6.19213	7.57838e-07
Cluster_181	5.10086	0.000461722
Cluster_182	13.8877	8.10932e-07
Cluster_189	5.21024	1.29541e-05
Cluster_192	5.64054	0.000230404
Cluster_194	5.31177	1.4926e-21
Cluster_214	11.3763	0.000921176
Cluster_221	6.1677	3.33494e-07
Cluster_226	7.26434	2.45473e-36
Cluster_227	5.24392	0.0172343
Cluster_229	-27.6196	0
Cluster_237	-7.01466	5.40736e-08
Cluster_249	7.47349	1.13192e-17
Cluster_250	-5.16904	1.41778e-08
Cluster_258	6.73901	2.93364e-07
Cluster_265	6.36411	5.47375e-11
Cluster_273	17.0677	1.0676e-06
Cluster_278	5.84638	1.52078e-10
Cluster_303	5.87439	6.64532e-13
Cluster_304	14.198	1.13542e-31
Cluster_305	-5.94073	6.12599e-07
Cluster_312	9.4219	2.09429e-15
Cluster_315	5.93617	0.015883
Cluster_319	7.67061	0.00035426
Cluster_323	7.98095	9.55806e-14
Cluster_327	7.22633	4.487e-16
Cluster_330	10.1763	2.04723e-10
Cluster_358	5.06472	0.0252573
Cluster_364	-7.97782	0.00101214
Cluster_365	8.20465	2.27474e-08
Cluster_372	8.54626	0.0239624
Cluster_384	-9.34802	6.27769e-05
Cluster_385	5.41219	0.011932
Cluster_396	8.76148	2.18567e-09
Cluster_410	7.29438	0.000191541
Cluster_417	9.74884	0.000191086
Cluster_419	6.38009	1.3539e-09
Cluster_423	6.68251	0.000315473
Cluster_427	-6.64009	2.7901e-05
Cluster_431	10.3091	1.18182e-06
Cluster_432	8.27997	3.17561e-16
Cluster_436	9.15456	2.85217e-06
Cluster_439	5.13625	1.05605e-05
Cluster_440	11.2357	7.51114e-06
Cluster_442	12.135	3.84544e-08
Cluster_445	-5.14529	3.2067e-07
Cluster_448	7.81885	8.44836e-09
Cluster_454	13.5762	1.13084e-12
Cluster_455	5.59133	4.69744e-09
Cluster_464	-5.99058	1.36426e-11
Cluster_468	-5.16177	0.00417674
Cluster_470	10.8254	5.68919e-14
Cluster_476	5.13158	0.0129526
Cluster_477	11.985	2.58719e-08
Cluster_481	6.07674	0.0215752
Cluster_482	13.9756	2.76951e-20
Cluster_488	7.12336	4.54629e-06
Cluster_490	5.43423	1.11353e-09
Cluster_491	6.57664	1.978e-17
Cluster_492	-9.97715	0.00148235
Cluster_493	7.29793	0.00148364
Cluster_497	7.1401	5.27548e-11
Cluster_503	16.9863	1.51599e-05
Cluster_507	7.29128	0.000245259
Cluster_513	14.1993	1.16994e-17
Cluster_514	14.6841	1.87074e-16
Cluster_518	14.2425	7.36531e-18
Cluster_520	7.82936	0.000223916
Cluster_522	6.36919	6.82548e-07
Cluster_523	8.96785	3.40009e-06
Cluster_528	7.28442	2.08167e-05
Cluster_539	8.86363	4.65921e-06
Cluster_540	-18.6134	0.0116158
Cluster_541	10.1967	2.63629e-06
Cluster_543	5.77471	2.8696e-05
Cluster_544	7.31367	1.56353e-07
Cluster_546	10.9108	1.28647e-11
Cluster_548	11.8032	2.35752e-22
Cluster_549	7.61041	1.26965e-09
Cluster_553	5.71794	2.88325e-07
Cluster_554	13.4056	1.78062e-11
Cluster_557	-8.20638	0.00482954
Cluster_568	8.55773	1.94054e-23
Cluster_569	5.31834	2.10802e-07
Cluster_573	-8.77104	5.31651e-08
Cluster_576	15.1897	2.76784e-11
Cluster_577	15.5604	6.55152e-54
Cluster_588	-7.87735	9.77316e-09
Cluster_590	7.55712	5.57075e-23
Cluster_591	-12.2063	1.69201e-12
Cluster_597	-7.93488	0.000165262
Cluster_598	-14.3258	1.27221e-28
Cluster_599	-5.88674	0.0142091
Cluster_601	-16.0129	4.42935e-07
Cluster_604	6.32828	1.08807e-10
Cluster_610	-13.3618	1.39099e-08
Cluster_615	5.75438	4.17103e-07
Cluster_632	5.93204	9.35219e-09
Cluster_633	6.36244	3.06088e-08
Cluster_646	-16.8049	8.31628e-11
Cluster_656	6.75953	3.65021e-10
Cluster_663	6.09822	4.54065e-09
Cluster_667	33.1735	1.82313e-34
Cluster_668	-21.1631	1.24006e-23
Cluster_677	6.5369	4.82178e-09
Cluster_680	8.78324	1.28084e-13
Cluster_681	9.16706	2.38615e-15
Cluster_682	5.07515	0.0300365
Cluster_685	12.6717	5.04984e-23
Cluster_693	8.36062	1.8288e-18
Cluster_694	-13.1469	5.58089e-08
Cluster_697	6.49364	1.4835e-09
Cluster_698	-9.06154	5.29428e-06
Cluster_702	5.02934	2.20813e-08
Cluster_705	7.143	1.479e-09
Cluster_706	-6.95981	0.0126156
Cluster_711	-18.9223	2.31145e-12
Cluster_712	-31.1757	1.21846e-15
Cluster_720	-5.12886	0.00115513
Cluster_723	7.23789	7.74767e-09
Cluster_724	-6.26275	2.20575e-09
Cluster_725	7.33054	1.27963e-05
Cluster_726	-7.63874	1.85751e-22
Cluster_727	-6.7733	0.0104579
Cluster_728	-10.0247	3.25041e-05
Cluster_729	5.51995	8.27538e-08
Cluster_736	12.9341	1.7107e-05
Cluster_742	-6.29821	5.22675e-09
Cluster_743	-13.7319	1.30896e-07
Cluster_746	-8.83053	3.49548e-06
Cluster_755	7.04457	3.38049e-19
Cluster_756	7.93314	3.62111e-16
Cluster_763	7.02758	2.6405e-10
Cluster_767	12.31	1.30156e-21
Cluster_773	9.81325	6.8367e-30
Cluster_774	14.7597	5.07886e-29
Cluster_777	6.11444	8.20743e-07
Cluster_787	16.1777	1.86574e-32
Cluster_793	9.78489	6.7155e-26
Cluster_795	7.66743	6.06062e-06
Cluster_797	-5.61994	3.64617e-06
Cluster_800	7.25515	6.85871e-07
Cluster_810	-6.99244	3.05638e-05
Cluster_815	6.33705	4.92709e-16
Cluster_819	6.29501	7.58378e-05
Cluster_821	14.7197	1.87235e-24
Cluster_823	9.84884	1.34989e-06
Cluster_829	6.04263	2.31454e-12
Cluster_831	-6.1706	3.3963e-09
Cluster_835	6.97717	4.43863e-09
Cluster_836	5.80265	7.26928e-06
Cluster_840	5.08427	1.54398e-05
Cluster_848	7.64867	1.64533e-09
Cluster_850	7.59447	0.000340994
Cluster_853	11.4805	2.25662e-10
Cluster_857	-6.05868	2.61569e-06
Cluster_863	5.3781	2.50545e-07
Cluster_867	7.58427	2.82511e-16
Cluster_869	7.86706	9.02496e-07
Cluster_873	5.28935	3.51103e-11
Cluster_883	-5.99389	4.07625e-05
Cluster_885	5.00436	3.46283e-05
Cluster_895	5.24792	0.000283664
Cluster_902	5.42819	2.70431e-11
Cluster_908	-6.89626	0.00659604
Cluster_915	5.13853	6.63135e-05
Cluster_916	8.40132	1.50599e-21
Cluster_919	-13.9522	5.33199e-24
Cluster_925	-15.1793	1.73354e-10
Cluster_927	9.46671	3.15573e-07
Cluster_932	8.26128	4.19716e-07
Cluster_938	7.61954	2.03862e-26
Cluster_940	-41.5852	9.95602e-142
Cluster_945	6.18596	0.000135104
Cluster_947	8.55438	8.39992e-10
Cluster_950	-20.4099	1.1083e-45
Cluster_951	7.77926	6.14728e-09
Cluster_955	9.52762	3.28797e-19
Cluster_956	-7.3156	5.72934e-05
Cluster_959	5.40138	1.52178e-08
Cluster_960	6.66262	5.25025e-08
Cluster_961	30.3535	3.38353e-27
Cluster_969	5.15283	7.31281e-07
Cluster_972	5.36577	1.89166e-05
Cluster_977	10.2751	9.46345e-19
Cluster_979	5.73614	0.00473694
Cluster_982	5.04013	7.52487e-23
Cluster_983	14.3452	2.68072e-16
Cluster_984	8.46506	1.35086e-08
Cluster_1001	5.78099	3.48147e-05
Cluster_1003	-25.1093	3.04287e-07
Cluster_1009	5.56841	3.9375e-14
Cluster_1012	11.5906	1.34799e-08
Cluster_1014	6.31142	3.4656e-09
Cluster_1015	11.7233	9.70517e-11
Cluster_1018	5.61631	4.10092e-08
Cluster_1033	8.32101	8.18882e-25
Cluster_1039	5.99574	0.0101072
Cluster_1040	6.94119	0.000307165
Cluster_1043	-7.50534	0.0406742
Cluster_1045	-10.8042	6.86968e-23
Cluster_1048	26.2698	0.000316513
Cluster_1055	-9.77531	0.00017798
Cluster_1059	5.0283	0.00113359
Cluster_1064	8.69281	9.34832e-09
Cluster_1066	-8.12916	6.35452e-07
Cluster_1067	5.62644	6.99751e-19
Cluster_1075	6.77362	5.11581e-09
Cluster_1080	5.02767	3.27389e-06
Cluster_1081	9.32414	6.85605e-10
Cluster_1085	5.23447	1.31361e-08
Cluster_1086	13.3205	4.59934e-17
Cluster_1088	36.0409	1.19396e-08
Cluster_1090	10.3763	5.37707e-14
Cluster_1091	9.18033	8.11993e-10
Cluster_1096	8.93906	6.44318e-23
Cluster_1105	6.25085	5.77092e-09
Cluster_1109	-5.72081	0.00135967
Cluster_1117	25.3995	2.32539e-30
Cluster_1125	10.9575	4.20125e-05
Cluster_1130	-18.4521	7.55117e-06
Cluster_1132	8.97441	4.0986e-14
Cluster_1134	9.6772	0.00357074
Cluster_1135	6.69898	1.11679e-06
Cluster_1136	7.47949	2.0927e-05
Cluster_1142	5.93926	0.00441309
Cluster_1145	12.4163	3.65566e-14
Cluster_1152	11.7092	0.00110852
Cluster_1153	5.43673	8.11093e-06
Cluster_1161	11.6911	2.03862e-26
Cluster_1172	5.31141	1.63258e-68
Cluster_1179	5.26292	0.0248483
Cluster_1180	5.23685	7.16229e-07
Cluster_1183	9.22627	5.40299e-64
Cluster_1184	7.86002	1.47874e-18
Cluster_1187	9.83104	7.55337e-13
Cluster_1188	7.28794	1.16972e-26
Cluster_1195	7.63482	2.69363e-10
Cluster_1196	17.06	2.95449e-26
Cluster_1198	6.36655	2.10467e-10
Cluster_1203	14.2938	1.11774e-05
Cluster_1208	6.55306	7.35397e-19
Cluster_1209	6.56938	1.00038e-12
Cluster_1210	12.3816	8.49611e-09
Cluster_1224	7.74973	0.000147831
Cluster_1228	8.19963	3.30134e-14
Cluster_1229	6.06722	6.7549e-06
Cluster_1232	15.2655	2.19482e-05
Cluster_1248	-14.3286	2.31692e-08
Cluster_1251	11.4668	0.000177788
Cluster_1254	6.76336	0.0078493
Cluster_1255	5.32116	0.00495603
Cluster_1259	-5.58341	0.0101168
Cluster_1262	8.18919	5.03843e-05
Cluster_1265	40.8169	3.74131e-21
Cluster_1271	5.77419	0.0369408
Cluster_1273	5.7516	0.00188312
Cluster_1276	-5.15489	0.00307989
Cluster_1279	18.5551	3.56795e-39
Cluster_1281	5.18836	0.00121271
Cluster_1285	12.4014	0.00032262
Cluster_1300	7.36573	3.20295e-20
Cluster_1301	-5.93214	7.9657e-05
Cluster_1315	7.70672	9.75264e-15
Cluster_1321	16.1826	1.23026e-06
Cluster_1326	-5.051	0.00775979
Cluster_1329	-6.16335	0.00631368
Cluster_1338	-5.3245	0.039294
Cluster_1342	7.32384	0.012925
Cluster_1346	7.32417	6.11589e-41
Cluster_1362	10.2733	0.00128991
Cluster_1364	6.38489	9.64502e-06
Cluster_1368	14.9408	7.53489e-10
Cluster_1369	7.77818	0.00222351
Cluster_1376	-60.831	7.26407e-40
Cluster_1386	5.42119	1.37655e-12
Cluster_1391	8.22575	0.000348721
Cluster_1392	8.73323	1.16929e-08
Cluster_1395	6.47787	0.00226822
Cluster_1397	5.19252	0.000189677
Cluster_1402	6.37459	4.14767e-09
Cluster_1405	6.56765	3.40807e-06
Cluster_1406	6.27768	7.80102e-12
Cluster_1410	-6.62529	0.00263992
Cluster_1412	-10.6587	0.00172102
Cluster_1414	-9.01435	0.000244965
Cluster_1419	7.76771	9.12019e-11
Cluster_1420	8.75445	1.37425e-06
Cluster_1421	8.19357	1.20183e-11
Cluster_1427	-13.9934	1.17516e-05
Cluster_1433	-9.21182	0.00098409
Cluster_1434	5.55834	0.00302926
Cluster_1438	5.11675	0.0232111
Cluster_1441	5.3717	2.79416e-09
Cluster_1442	7.77239	2.50286e-11
Cluster_1444	7.64183	2.67636e-06
Cluster_1446	6.76697	1.72749e-09
Cluster_1447	11.8689	5.66247e-22
Cluster_1452	7.37475	5.95809e-22
Cluster_1459	15.1219	2.81661e-18
Cluster_1460	6.50365	4.40259e-05
Cluster_1466	7.01347	2.39449e-05
Cluster_1471	5.97807	0.00291394
Cluster_1473	7.1855	1.17556e-05
Cluster_1474	5.38246	1.34391e-07
Cluster_1493	7.46967	7.58765e-07
Cluster_1494	-10.0271	0.00742347
Cluster_1499	9.59981	5.86828e-12
Cluster_1507	19.6049	1.49961e-12
Cluster_1509	5.47323	0.00562148
Cluster_1514	11.4428	1.48749e-16
Cluster_1524	6.11855	1.76609e-06
Cluster_1525	-11.1121	6.39383e-29
Cluster_1529	7.03539	6.78588e-13
Cluster_1532	-7.61368	1.51642e-07
Cluster_1533	13.9397	5.55724e-09
Cluster_1538	8.71635	4.56842e-22
Cluster_1540	8.34628	0.00391477
Cluster_1544	-10.0716	0.0361015
Cluster_1546	-10.2915	5.93921e-10
Cluster_1547	-6.00132	0.00186021
Cluster_1548	-5.62016	8.92027e-05
Cluster_1557	17.1761	3.07423e-10
Cluster_1559	10.4304	2.07188e-10
Cluster_1560	-11.1303	1.15831e-17
Cluster_1564	5.45014	0.000424145
Cluster_1566	8.51522	2.29062e-20
Cluster_1582	7.91259	4.63724e-09
Cluster_1583	5.32714	1.01872e-05
Cluster_1590	6.56976	6.49651e-09
Cluster_1594	7.63755	1.42286e-16
Cluster_1601	8.45266	9.08685e-12
Cluster_1602	-19.3518	3.21288e-14
Cluster_1607	9.80572	0.000366893
Cluster_1609	10.0995	0.00855438
Cluster_1612	5.9709	1.61724e-09
Cluster_1617	16.9188	0.0178674
Cluster_1618	8.1146	4.76993e-10
Cluster_1630	7.69569	8.027e-05
Cluster_1632	11.0716	1.92854e-09
Cluster_1633	5.15565	0.000430958
Cluster_1636	-6.02837	0.0406772
Cluster_1638	7.4224	5.99362e-11
Cluster_1639	5.33887	1.17881e-09
Cluster_1645	11.3363	8.15631e-30
Cluster_1649	5.22316	2.10554e-05
Cluster_1650	8.21234	1.79802e-09
Cluster_1652	6.75214	5.24629e-11
Cluster_1653	-22.9324	3.89819e-50
Cluster_1662	-7.51292	0.0187694
Cluster_1669	5.37941	7.18512e-07
Cluster_1670	5.86374	1.18909e-11
Cluster_1671	16.0182	9.186e-15
Cluster_1672	8.34937	0.000637962
Cluster_1674	6.94297	5.48159e-07
Cluster_1676	6.47041	1.69201e-12
Cluster_1689	6.4566	2.50005e-08
Cluster_1693	22.4421	2.51403e-24
Cluster_1713	-8.0091	0.00240418
Cluster_1714	5.0797	0.00841876
Cluster_1715	6.87147	3.22223e-09
Cluster_1722	-16.5794	0.00421899
Cluster_1748	5.40727	0.00256793
Cluster_1749	-7.90187	0.000324781
Cluster_1751	14.8304	7.73598e-27
Cluster_1752	5.0013	9.30564e-08
Cluster_1756	15.4226	1.78088e-16
Cluster_1757	-5.30084	0.029275
Cluster_1758	15.1998	1.82726e-15
Cluster_1761	5.17651	4.24954e-12
Cluster_1778	7.17255	9.54431e-07
Cluster_1780	8.66207	7.66983e-25
Cluster_1782	6.43987	5.7821e-08
Cluster_1802	7.60124	0.00726493
Cluster_1803	6.4687	6.00874e-06
Cluster_1811	8.58664	6.77715e-05
Cluster_1817	6.64656	4.71525e-08
Cluster_1825	-6.39745	0.000376767
Cluster_1826	-6.13982	1.96396e-05
Cluster_1828	-6.00935	0.00837913
Cluster_1829	8.06386	5.34745e-16
Cluster_1831	8.58238	7.59409e-10
Cluster_1844	6.90037	6.52472e-12
Cluster_1851	-5.40083	4.35173e-05
Cluster_1859	-5.01549	0.000132728
Cluster_1871	7.62435	3.78575e-09
Cluster_1877	5.21314	0.0290289
Cluster_1883	-5.89431	0.00654629
Cluster_1890	5.41936	1.86684e-08
Cluster_1894	8.28012	0.0280368
Cluster_1896	9.09091	0.022506
Cluster_1900	6.99218	0.000220822
Cluster_1919	8.27068	0.00321882
Cluster_1935	13.5311	7.17108e-35
Cluster_1943	5.72354	0.00658505
Cluster_1946	10.9757	1.39214e-12
Cluster_1962	6.68561	2.46369e-05
Cluster_1975	5.70898	5.74979e-07
Cluster_1979	6.93815	3.0984e-06
Cluster_1981	6.41308	6.37101e-13
Cluster_1982	5.25313	2.23305e-07
Cluster_1986	6.36717	9.66623e-14
Cluster_1987	5.46464	6.05564e-05
Cluster_1996	14.2995	1.72679e-10
Cluster_1997	5.35485	4.82986e-05
Cluster_2000	6.48351	5.18555e-05
Cluster_2001	7.14289	3.47166e-05
Cluster_2027	-24.3169	2.14485e-19
Cluster_2031	5.98833	5.5576e-09
Cluster_2032	7.5635	3.75577e-06
Cluster_2046	5.33781	0.00101481
Cluster_2047	5.07602	1.8129e-05
Cluster_2048	7.31938	1.36479e-12
Cluster_2049	6.75603	4.22179e-81
Cluster_2052	8.89319	8.51498e-18
Cluster_2053	10.6211	4.01429e-15
Cluster_2054	-11.9877	5.00938e-08
Cluster_2056	10.3476	5.66678e-19
Cluster_2063	-5.03542	0.0235019
Cluster_2070	7.57497	7.21198e-12
Cluster_2082	-21.7836	3.6058e-92
Cluster_2084	-18.4365	1.85017e-35
Cluster_2093	-13.6165	3.12293e-06
Cluster_2098	-16.9526	3.71375e-16
Cluster_2099	6.71468	1.6221e-11
Cluster_2105	8.23738	8.00715e-15
Cluster_2108	6.94429	2.13854e-08
Cluster_2112	10.4379	7.84941e-08
Cluster_2114	9.82885	5.37191e-08
Cluster_2117	7.29052	9.8963e-11
Cluster_2118	7.13342	4.67403e-12
Cluster_2124	5.0079	0.000635541
Cluster_2126	9.23567	0.0179549
Cluster_2128	5.38405	1.94934e-12
Cluster_2142	9.00089	7.56337e-27
Cluster_2152	7.46309	1.57268e-05
Cluster_2157	12.4247	0.00021497
Cluster_2159	11.4936	3.27347e-27
Cluster_2162	8.60805	8.07019e-13
Cluster_2165	5.9758	7.949e-10
Cluster_2167	7.48503	1.81735e-10
Cluster_2168	7.32755	3.22439e-10
Cluster_2178	14.2254	5.11438e-23
Cluster_2190	5.40114	0.0235774
Cluster_2198	7.46859	5.10361e-11
Cluster_2214	6.48202	2.42585e-06
Cluster_2216	6.78356	4.4124e-07
Cluster_2217	5.25768	8.8973e-07
Cluster_2222	8.34526	1.55081e-16
Cluster_2232	8.22346	0.00481072
Cluster_2233	6.55354	1.97203e-13
Cluster_2234	5.56598	3.51836e-12
Cluster_2235	5.45104	0.000758866
Cluster_2237	5.46049	4.22249e-14
Cluster_2248	8.30316	0.00052141
Cluster_2251	7.11212	1.03052e-13
Cluster_2256	8.10448	6.99196e-07
Cluster_2263	13.7159	2.33418e-07
Cluster_2272	-6.78312	0.00482065
Cluster_2273	-5.06058	2.94283e-05
Cluster_2274	-8.48329	1.17473e-07
Cluster_2277	7.98553	7.21313e-06
Cluster_2280	6.8805	4.59848e-16
Cluster_2287	8.46644	1.61375e-06
Cluster_2292	-8.70596	3.45853e-05
Cluster_2301	-9.10755	1.09632e-09
Cluster_2302	5.35477	0.0474049
Cluster_2304	7.16497	7.14872e-10
Cluster_2307	6.05048	9.64263e-07
Cluster_2313	11.7633	4.96741e-12
Cluster_2320	7.25589	1.6006e-06
Cluster_2323	6.76403	2.88837e-05
Cluster_2324	5.22028	1.63956e-09
Cluster_2329	6.25073	7.70104e-14
Cluster_2330	6.56694	0.000352827
Cluster_2337	9.49231	0.00134968
Cluster_2340	5.35509	7.60347e-07
Cluster_2342	8.78045	1.09278e-25
Cluster_2346	5.43067	3.81891e-14
Cluster_2348	10.5497	9.221e-22
Cluster_2349	6.56332	1.06773e-21
Cluster_2352	5.09954	5.4928e-06
Cluster_2373	7.31216	2.94915e-12
Cluster_2375	5.82719	1.18715e-05
Cluster_2376	9.18681	4.92706e-25
Cluster_2379	5.56705	4.80719e-05
Cluster_2381	12.4489	2.7032e-06
Cluster_2382	5.59462	5.484e-06
Cluster_2383	6.52035	2.45408e-10
Cluster_2395	5.55865	0.00157115
Cluster_2398	6.02423	2.80543e-10
Cluster_2410	5.63231	6.18369e-07
Cluster_2413	6.31273	1.5498e-10
Cluster_2416	14.4462	0.00493134
Cluster_2426	6.23542	0.0015448
Cluster_2433	7.9727	1.65033e-06
Cluster_2436	6.67434	0.000777526
Cluster_2437	8.00053	1.71209e-16
Cluster_2444	-25.7076	2.86718e-44
Cluster_2447	-8.52533	1.17133e-05
Cluster_2451	-10.9819	0.0122482
Cluster_2464	8.09761	1.09479e-15
Cluster_2468	8.31405	0.00255258
Cluster_2479	6.64771	2.60405e-06
Cluster_2484	6.58647	1.06202e-07
Cluster_2485	10.6087	1.71844e-22
Cluster_2487	10.0155	1.61811e-22
Cluster_2488	-6.90777	9.20087e-09
Cluster_2494	11.3454	1.56318e-12
Cluster_2495	6.53193	1.34066e-18
Cluster_2499	73	1.37372e-06
Cluster_2502	5.57534	1.61861e-07
Cluster_2503	6.66385	2.30039e-12
Cluster_2512	5.23123	1.77511e-08
Cluster_2513	5.10727	1.86027e-06
Cluster_2518	8.28338	6.70223e-06
Cluster_2519	16.2133	1.42437e-32
Cluster_2526	51.2075	2.34418e-33
Cluster_2532	-6.50198	0.000145503
Cluster_2534	7.77791	3.47737e-05
Cluster_2540	7.50117	7.34885e-11
Cluster_2549	7.51918	1.0516e-45
Cluster_2563	5.12101	4.22362e-09
Cluster_2569	6.03812	3.45144e-06
Cluster_2572	-23.7292	4.22845e-51
Cluster_2573	-9.16049	3.88842e-09
Cluster_2582	-6.80572	1.16009e-09
Cluster_2584	-16.913	7.01056e-20
Cluster_2590	8.45636	7.69877e-07
Cluster_2598	-8.36199	7.88315e-31
Cluster_2600	20.1591	7.03835e-13
Cluster_2611	7.04252	4.35417e-13
Cluster_2614	5.24687	1.40449e-14
Cluster_2616	5.82812	0.0416665
Cluster_2618	5.33156	2.47038e-06
Cluster_2620	-5.00903	3.74423e-07
Cluster_2640	6.75777	1.76297e-18
Cluster_2662	7.13427	7.49708e-12
Cluster_2668	10.4718	0.00122272
Cluster_2671	6.47369	2.2797e-08
Cluster_2679	6.0909	2.19271e-13
Cluster_2683	5.95189	0.0242646
Cluster_2687	6.2188	3.22906e-09
Cluster_2692	8.5653	1.11167e-17
Cluster_2695	7.84853	1.14289e-30
Cluster_2700	10.2842	4.1453e-05
Cluster_2709	6.97486	0.0182505
Cluster_2710	6.23769	3.28603e-06
Cluster_2712	8.95094	0.00574992
Cluster_2714	-5.64238	0.0273813
Cluster_2720	6.06294	0.00391405
Cluster_2724	17.322	9.25776e-05
Cluster_2730	-28.1479	8.17228e-40
Cluster_2732	8.99114	3.97082e-16
Cluster_2737	7.49419	6.2066e-07
Cluster_2747	-18.8015	1.61079e-08
Cluster_2748	9.68921	7.46163e-18
Cluster_2750	6.24321	1.76284e-12
Cluster_2761	5.02809	2.56351e-06
Cluster_2762	6.18027	6.70991e-09
Cluster_2765	5.12321	0.00201624
Cluster_2766	6.2076	4.46131e-05
Cluster_2767	7.68391	1.54132e-25
Cluster_2777	5.51143	0.000194548
Cluster_2778	11.3341	0.00418718
Cluster_2779	18.9425	8.69346e-07
Cluster_2781	9.44463	0.000143723
Cluster_2783	26.6575	2.29052e-23
Cluster_2784	8.43717	6.37421e-20
Cluster_2789	5.18952	2.43772e-06
Cluster_2791	6.56968	2.88837e-05
Cluster_2804	-7.50689	4.75215e-05
Cluster_2805	6.43084	0.000495242
Cluster_2807	7.57573	1.15625e-21
Cluster_2809	5.20153	8.27151e-08
Cluster_2814	5.49335	0.000143273
Cluster_2815	8.05873	1.93705e-14
Cluster_2822	6.39511	0.000326292
Cluster_2823	-7.40546	1.55922e-06
Cluster_2824	20.7853	1.43599e-15
Cluster_2825	6.2219	2.5909e-07
Cluster_2828	5.14861	0.0275004
Cluster_2841	5.81071	2.61565e-08
Cluster_2842	10.9329	4.33771e-06
Cluster_2858	74.605	7.85194e-135
Cluster_2863	7.04562	3.69776e-18
Cluster_2868	21.9025	1.18149e-23
Cluster_2870	7.88179	0.00250469
Cluster_2871	-11.0092	0.000188073
Cluster_2873	7.76123	9.51478e-08
Cluster_2879	5.63005	3.65123e-08
Cluster_2880	6.99419	0.000459283
Cluster_2886	17.0378	3.07823e-08
Cluster_2891	-15.1823	4.4644e-08
Cluster_2903	9.33606	3.3558e-06
Cluster_2911	6.51235	7.67494e-10
Cluster_2916	5.52881	5.38214e-12
Cluster_2937	-15.7653	3.41693e-05
Cluster_2952	7.45299	2.84235e-05
Cluster_2958	5.51247	1.50754e-49
Cluster_2971	-17.5943	5.88691e-13
Cluster_2973	-5.33958	6.51526e-06
Cluster_2979	8.36986	6.00382e-21
Cluster_2982	11.9466	6.85501e-15
Cluster_2985	7.74866	0.00214677
Cluster_2986	7.09395	0.00823642
Cluster_2995	-22.4337	4.40694e-10
Cluster_2996	6.78977	1.01694e-13
Cluster_2998	5.16481	0.00135093
Cluster_3000	27.1575	6.41628e-07
Cluster_3019	8.32803	1.00966e-22
Cluster_3027	7.29128	6.05206e-08
Cluster_3029	-5.9011	0.013205
Cluster_3034	6.21486	0.00366489
Cluster_3041	-5.39079	0.00157331
Cluster_3057	7.75749	1.29486e-30
Cluster_3058	-8.51287	7.45297e-05
Cluster_3059	5.55309	3.40508e-14
Cluster_3062	5.71999	1.20354e-16
Cluster_3064	-8.10211	0.0160555
Cluster_3073	7.67779	7.68074e-07
Cluster_3096	-7.12297	0.000429427
Cluster_3097	-8.17132	8.70563e-05
Cluster_3101	5.82496	0.000982688
Cluster_3103	12.1957	1.54515e-21
Cluster_3106	-11.2295	0.00026659
Cluster_3109	6.71973	4.70414e-05
Cluster_3116	68.1457	3.72027e-05
Cluster_3118	5.62252	7.37232e-06
Cluster_3119	6.35549	3.36184e-11
Cluster_3123	5.06306	0.0143621
Cluster_3126	8.25727	5.80586e-19
Cluster_3136	5.26013	1.33814e-15
Cluster_3139	8.29205	1.2433e-15
Cluster_3141	5.0352	9.51074e-06
Cluster_3142	5.00007	1.0226e-08
Cluster_3143	5.17141	3.56088e-10
Cluster_3148	7.68541	2.83167e-06
Cluster_3154	22.0338	5.72373e-22
Cluster_3155	9.96367	3.75953e-08
Cluster_3156	-9.08638	0.000613897
Cluster_3158	8.71955	1.98735e-21
Cluster_3159	5.05223	4.59154e-05
Cluster_3168	-16.0257	5.0771e-19
Cluster_3170	20.0717	0.00704561
Cluster_3173	6.58822	1.02506e-08
Cluster_3182	6.09859	9.99633e-13
Cluster_3189	8.25541	0.00298599
Cluster_3198	-12.2004	0.000264853
Cluster_3201	8.4792	0.00110422
Cluster_3207	-5.24977	0.00266877
Cluster_3211	6.525	5.99512e-13
Cluster_3213	-9.35284	0.0004615
Cluster_3221	5.49196	5.2175e-06
Cluster_3237	10.3244	1.16711e-14
Cluster_3238	5.28989	0.000106886
Cluster_3239	9.47321	1.95831e-12
Cluster_3246	-8.50655	4.3268e-08
Cluster_3251	5.30558	4.12771e-05
Cluster_3270	5.65429	0.000910715
Cluster_3272	5.27452	3.72262e-09
Cluster_3280	-31.2321	0.0305696
Cluster_3282	7.24293	7.45142e-10
Cluster_3283	7.83727	1.00681e-15
Cluster_3285	8.90679	1.06188e-17
Cluster_3296	-5.42591	0.00665251
Cluster_3299	6.01205	1.84098e-10
Cluster_3307	7.00339	1.81796e-07
Cluster_3311	5.13498	2.04215e-07
Cluster_3313	-8.711	0.0114538
Cluster_3320	6.11395	1.53202e-09
Cluster_3326	5.14949	0.000918529
Cluster_3328	6.55955	4.36865e-09
Cluster_3339	5.21966	2.82438e-11
Cluster_3341	9.38974	2.20217e-17
Cluster_3343	13.5059	3.28838e-05
Cluster_3346	5.43859	5.05379e-06
Cluster_3347	-5.4532	1.09411e-05
Cluster_3349	6.29668	3.79112e-08
Cluster_3352	-5.73796	3.54318e-08
Cluster_3354	7.25782	1.23365e-10
Cluster_3355	18.674	8.30827e-26
Cluster_3359	8.86879	1.14236e-08
Cluster_3364	5.26031	4.59025e-08
Cluster_3366	-5.12313	0.0110899
Cluster_3383	6.38641	1.1965e-12
Cluster_3397	9.12033	5.22976e-18
Cluster_3405	5.40607	1.03841e-06
Cluster_3406	6.17672	5.28103e-11
Cluster_3412	5.22163	3.20795e-07
Cluster_3414	55.5332	4.5339e-99
Cluster_3421	5.18104	2.18069e-08
Cluster_3423	9.8322	4.46741e-27
Cluster_3425	6.82731	0.00237239
Cluster_3427	13.8197	2.82599e-27
Cluster_3430	5.74919	1.53925e-05
Cluster_3435	6.15853	1.37071e-07
Cluster_3436	12.0751	3.59458e-14
Cluster_3440	17.3485	4.60211e-24
Cluster_3445	6.04072	0.0243089
Cluster_3446	8.58559	1.69703e-09
Cluster_3452	-14.4186	1.14276e-05
Cluster_3455	5.75429	0.00016879
Cluster_3458	19.5238	2.80029e-06
Cluster_3460	12.1446	1.24652e-12
Cluster_3467	10.3779	4.03288e-13
Cluster_3472	8.98047	1.10141e-14
Cluster_3484	-6.31504	0.0146445
Cluster_3495	7.64037	9.60632e-08
Cluster_3496	5.31521	2.27637e-09
Cluster_3505	5.01827	1.32859e-06
Cluster_3508	8.48381	8.89527e-13
Cluster_3515	7.9235	4.65674e-10
Cluster_3518	7.34239	3.58573e-08
Cluster_3524	10.5342	0.00119448
Cluster_3533	8.60756	7.99103e-14
Cluster_3536	-10.3367	9.21092e-10
Cluster_3538	9.16745	6.445e-05
Cluster_3539	14.5128	8.67557e-06
Cluster_3543	6.01853	2.66631e-18
Cluster_3551	6.65195	6.34547e-06
Cluster_3552	5.28438	3.12415e-08
Cluster_3554	6.07892	1.18495e-07
Cluster_3558	6.19718	2.4186e-06
Cluster_3560	6.78097	0.000961369
Cluster_3565	5.30304	0.000238618
Cluster_3571	-9.94739	1.83182e-46
Cluster_3572	6.19967	0.000246883
Cluster_3575	8.31584	6.03981e-19
Cluster_3582	7.82359	1.8597e-28
Cluster_3585	7.23149	0.0051712
Cluster_3587	6.97178	1.61375e-06
Cluster_3588	-11.26	1.61249e-14
Cluster_3602	-42.4851	4.01788e-19
Cluster_3603	8.31081	5.4844e-20
Cluster_3619	6.07679	0.00231837
Cluster_3624	-5.21303	5.13484e-10
Cluster_3649	-10.7236	1.4904e-09
Cluster_3651	6.03162	4.25463e-11
Cluster_3661	-10.1246	0.00625189
Cluster_3670	5.64862	1.44426e-19
Cluster_3671	6.39193	1.06687e-05
Cluster_3672	-5.53876	1.8276e-05
Cluster_3685	11.3414	1.48806e-41
Cluster_3696	30.5912	0.0473159
Cluster_3709	8.22201	3.34971e-10
Cluster_3717	9.01096	1.06137e-08
Cluster_3720	7.27968	2.90077e-15
Cluster_3724	6.36314	1.69078e-13
Cluster_3733	7.84657	6.78908e-12
Cluster_3734	-7.41999	7.19126e-12
Cluster_3740	5.66888	1.21949e-08
Cluster_3749	7.81075	2.60074e-17
Cluster_3753	-7.26445	0.00386802
Cluster_3764	10.1844	7.99329e-09
Cluster_3776	16.0826	8.47513e-39
Cluster_3786	5.78173	6.76597e-07
Cluster_3789	5.94399	8.66125e-21
Cluster_3799	8.21918	0.000163528
Cluster_3805	6.3692	2.53638e-09
Cluster_3807	6.94252	3.85925e-05
Cluster_3811	-11.3095	9.04536e-05
Cluster_3814	6.45481	7.52763e-12
Cluster_3832	9.15555	2.30789e-13
Cluster_3835	5.66355	6.81672e-08
Cluster_3837	-8.14392	0.000180938
Cluster_3844	8.33706	9.27902e-10
Cluster_3848	12.416	0.0109362
Cluster_3849	6.44699	0.00829372
Cluster_3853	5.71646	2.74355e-74
Cluster_3862	5.51657	0.0151638
Cluster_3864	5.04616	0.00875238
Cluster_3891	5.08374	5.92008e-05
Cluster_3899	9.37634	0.00594762
Cluster_3902	-11.7172	0.00704561
Cluster_3904	6.74208	7.83218e-06
Cluster_3909	14.3633	3.30609e-12
Cluster_3910	9.58412	0.0129935
Cluster_3913	5.01507	1.23912e-05
Cluster_3915	-10.7505	0.0186688
Cluster_3919	11.0497	5.57918e-24
Cluster_3947	48.7592	1.0391e-05
Cluster_3952	-15.9414	1.57386e-08
Cluster_3958	6.37915	1.95147e-12
Cluster_3960	7.67981	4.57827e-05
Cluster_3974	-11.7745	6.67137e-25
Cluster_3976	36.5701	9.40876e-24
Cluster_3984	5.56365	2.4379e-13
Cluster_3985	5.44247	5.17523e-75
Cluster_3990	6.19955	3.56444e-06
Cluster_3991	7.21528	8.12766e-08
Cluster_4001	-6.0668	0.00862546
Cluster_4006	8.02781	3.37703e-15
Cluster_4009	18.1288	2.09602e-13
Cluster_4013	-5.02421	1.49245e-07
Cluster_4016	10.9453	6.09261e-26
Cluster_4019	5.22695	5.26819e-06
Cluster_4023	7.54579	3.37621e-18
Cluster_4040	11.5018	1.69516e-07
Cluster_4042	21.4122	6.4567e-20
Cluster_4046	28.4798	2.07253e-31
Cluster_4049	19.0145	7.03469e-95
Cluster_4050	6.79082	6.31732e-11
Cluster_4054	9.63949	6.42439e-10
Cluster_4056	5.72024	4.87973e-07
Cluster_4061	7.24617	1.04242e-08
Cluster_4063	6.25782	2.80208e-06
Cluster_4072	-9.18389	0.0226099
Cluster_4080	-14.3333	0.0481725
Cluster_4083	6.96904	1.38247e-05
Cluster_4088	7.91092	3.1912e-08
Cluster_4096	6.43317	1.85659e-11
Cluster_4099	9.57139	1.4059e-16
Cluster_4103	5.55636	3.18792e-07
Cluster_4104	-6.36808	0.000185867
Cluster_4110	5.10307	4.81946e-05
Cluster_4117	5.5829	0.000195408
Cluster_4123	-5.28997	2.04474e-05
Cluster_4124	-11.4135	0.00188258
Cluster_4125	-6.00509	1.48328e-12
Cluster_4129	-13.1422	1.35511e-16
Cluster_4130	5.27471	2.45535e-05
Cluster_4139	-9.36639	0.0122398
Cluster_4140	8.81704	1.5991e-24
Cluster_4142	5.33825	0.000267802
Cluster_4149	7.1127	4.31271e-17
Cluster_4156	8.96262	3.48122e-11
Cluster_4159	5.90809	9.98308e-07
Cluster_4163	-5.54452	0.000212364
Cluster_4169	6.4219	0.000125032
Cluster_4171	5.92332	0.000108889
Cluster_4177	6.19803	0.0139548
Cluster_4178	5.27442	2.93957e-12
Cluster_4181	8.05247	1.36149e-17
Cluster_4185	5.48898	3.1473e-09
Cluster_4190	11.1639	2.30318e-26
Cluster_4191	5.87838	4.19928e-07
Cluster_4195	8.89768	2.34029e-16
Cluster_4203	-5.60781	3.19447e-07
Cluster_4209	9.07326	8.3133e-12
Cluster_4212	5.50965	1.15036e-10
Cluster_4229	5.39583	0.00177156
Cluster_4230	7.99432	1.88018e-08
Cluster_4233	5.48046	1.6539e-08
Cluster_4245	7.57552	6.93776e-10
Cluster_4249	6.26149	5.38607e-17
Cluster_4250	9.47773	1.38582e-15
Cluster_4256	5.98426	7.53615e-06
Cluster_4261	6.67478	0.000989784
Cluster_4265	7.0178	1.30183e-08
Cluster_4267	7.70623	5.31153e-09
Cluster_4268	10.6778	4.07483e-09
Cluster_4278	6.03558	2.80098e-08
Cluster_4280	7.97419	1.03032e-11
Cluster_4281	5.92754	7.51784e-06
Cluster_4282	7.92105	6.86677e-05
Cluster_4285	5.25616	9.14776e-11
Cluster_4291	6.39351	1.10564e-07
Cluster_4304	7.16567	1.9614e-05
Cluster_4306	-8.4413	3.02878e-07
Cluster_4310	6.6214	1.78405e-18
Cluster_4316	6.97056	8.78379e-09
Cluster_4327	5.97051	8.00366e-07
Cluster_4329	5.9093	0.0194505
Cluster_4333	6.30185	3.14619e-06
Cluster_4336	49.9577	3.33234e-54
Cluster_4343	10.3608	0.000113822
Cluster_4348	8.34397	8.47095e-10
Cluster_4350	-5.04002	0.006402
Cluster_4352	16.6887	1.35188e-08
Cluster_4358	5.30387	6.38368e-07
Cluster_4364	10.6677	2.63829e-06
Cluster_4370	7.94468	0.00915079
Cluster_4385	8.1509	1.6338e-12
Cluster_4394	6.46071	1.011e-09
Cluster_4403	7.33118	8.64587e-13
Cluster_4404	-5.98954	0.0111716
Cluster_4422	7.23447	3.00051e-13
Cluster_4425	5.80964	1.24404e-10
Cluster_4427	8.03067	1.08902e-05
Cluster_4431	16.949	4.76759e-23
Cluster_4434	6.29912	5.2335e-08
Cluster_4437	5.71338	6.92656e-05
Cluster_4439	8.76804	4.92544e-23
Cluster_4449	6.87025	0.000336823
Cluster_4450	7.02339	0.0001609
Cluster_4454	5.21165	1.99959e-06
Cluster_4456	6.32437	2.84856e-10
Cluster_4465	5.72826	1.1485e-15
Cluster_4467	7.17173	2.83786e-11
Cluster_4468	-7.57584	1.70029e-06
Cluster_4477	5.43997	2.80713e-08
Cluster_4482	10.5654	1.14241e-11
Cluster_4483	8.20363	9.18091e-06
Cluster_4484	7.13446	8.58789e-16
Cluster_4485	7.16936	6.80719e-08
Cluster_4489	-5.87719	0.0189907
Cluster_4492	6.10508	1.61621e-07
Cluster_4510	6.22339	2.62801e-10
Cluster_4511	-7.06613	7.11027e-06
Cluster_4512	6.16501	9.50232e-13
Cluster_4516	-8.98254	1.19912e-09
Cluster_4518	-7.01917	1.39136e-06
Cluster_4524	10.0472	6.64008e-19
Cluster_4528	8.74408	3.871e-12
Cluster_4531	6.78777	0.000709643
Cluster_4535	10.6088	1.37701e-18
Cluster_4537	7.7567	3.26062e-05
Cluster_4540	-12.9052	1.42604e-08
Cluster_4544	11.8443	0.000245302
Cluster_4560	10.4548	1.89124e-05
Cluster_4561	14.9017	5.07595e-31
Cluster_4563	6.45197	0.0023347
Cluster_4564	5.28798	6.82462e-11
Cluster_4566	14.5659	0.00174151
Cluster_4567	5.29493	0.000133396
Cluster_4572	-14.8214	2.70926e-05
Cluster_4575	-19.7948	4.60562e-13
Cluster_4576	7.46101	1.46008e-06
Cluster_4577	7.54422	0.00318054
Cluster_4578	-13.9153	2.54929e-06
Cluster_4580	7.91556	9.93261e-07
Cluster_4583	13.3725	2.56959e-11
Cluster_4593	5.20904	0.000523523
Cluster_4598	6.65256	4.12821e-15
Cluster_4603	7.96829	0.000167722
Cluster_4604	-6.37519	9.27637e-05
Cluster_4606	8.27321	0.00187214
Cluster_4607	13.7901	0.000151576
Cluster_4608	6.12371	1.5294e-16
Cluster_4611	5.90598	5.41675e-14
Cluster_4618	5.81084	0.00303237
Cluster_4623	11.0605	0.000381086
Cluster_4633	-9.94706	3.86291e-10
Cluster_4635	16.7027	2.47018e-12
Cluster_4638	13.1454	9.67551e-09
Cluster_4640	6.85364	0.0029583
Cluster_4650	5.20015	4.11559e-11
Cluster_4652	8.45137	1.10886e-27
Cluster_4670	7.12353	1.53011e-21
Cluster_4675	-5.53208	5.58856e-09
Cluster_4681	6.32838	0.00758772
Cluster_4682	5.6892	1.69842e-08
Cluster_4683	5.29308	0.00183756
Cluster_4687	5.79505	1.5149e-07
Cluster_4688	-5.53357	0.00251275
Cluster_4692	5.511	9.0853e-05
Cluster_4696	5.87682	9.19598e-07
Cluster_4703	6.35407	1.27432e-18
Cluster_4704	13.3623	8.09076e-09
Cluster_4707	21.8094	1.79757e-34
Cluster_4711	10.5694	3.60222e-10
Cluster_4712	16.9818	3.25962e-17
Cluster_4718	6.69683	1.03837e-07
Cluster_4721	-18.7344	5.45079e-08
Cluster_4732	11.6494	5.2455e-06
Cluster_4733	-6.70122	0.0089189
Cluster_4734	15.6578	9.3985e-09
Cluster_4737	7.51564	0.000168657
Cluster_4739	6.32289	2.22257e-11
Cluster_4741	5.18853	3.56734e-09
Cluster_4746	10.3433	1.60882e-11
Cluster_4747	13.5336	7.17282e-14
Cluster_4750	8.18841	5.05683e-12
Cluster_4761	6.87778	8.43429e-07
Cluster_4763	5.47094	5.08514e-07
Cluster_4765	5.47181	0.000115931
Cluster_4768	-7.7375	4.38193e-06
Cluster_4780	9.41261	3.34526e-11
Cluster_4781	5.54469	2.27725e-07
Cluster_4782	9.66361	1.3223e-12
Cluster_4785	5.6246	4.68915e-08
Cluster_4790	-5.12573	5.33342e-09
Cluster_4793	5.96372	3.46776e-06
Cluster_4797	10.6936	1.2133e-16
Cluster_4805	5.57877	1.23341e-08
Cluster_4813	7.13826	2.37732e-05
Cluster_4815	7.0685	6.32391e-06
Cluster_4820	5.74958	7.8857e-08
Cluster_4822	17.3959	0.002978
Cluster_4823	5.43499	2.49018e-07
Cluster_4831	-6.81053	6.49738e-05
Cluster_4832	6.31545	5.55343e-12
Cluster_4835	-5.44211	0.0140972
Cluster_4839	7.05057	2.67142e-11
Cluster_4842	-46.0035	6.69159e-31
Cluster_4845	9.1068	9.42896e-12
Cluster_4846	5.70321	9.15813e-09
Cluster_4847	6.05627	1.43032e-14
Cluster_4858	-8.80745	1.17039e-05
Cluster_4861	-5.51394	5.68491e-05
Cluster_4868	12.6896	9.4267e-05
Cluster_4870	5.98764	0.000629942
Cluster_4874	7.18325	5.73132e-07
Cluster_4883	5.10362	0.00200082
Cluster_4893	8.03207	1.22608e-12
Cluster_4895	-8.5406	0.000207124
Cluster_4898	13.8265	2.66203e-51
Cluster_4899	5.92183	5.47902e-05
Cluster_4901	7.58685	2.9891e-11
Cluster_4903	5.98848	8.14187e-08
Cluster_4905	12.149	3.51481e-19
Cluster_4911	7.10189	8.07948e-11
Cluster_4914	19.4232	2.89815e-56
Cluster_4915	6.63543	2.72639e-07
Cluster_4919	5.50651	0.000110846
Cluster_4923	7.39516	2.48796e-15
Cluster_4926	6.10403	8.64835e-05
Cluster_4945	15.1696	1.46319e-41
Cluster_4948	5.77692	3.77206e-10
Cluster_4953	6.43467	1.12963e-07
Cluster_4958	16.4243	2.09569e-08
Cluster_4964	8.43929	4.48645e-10
Cluster_4965	12.4124	4.51123e-16
Cluster_4967	14.4857	8.52831e-40
Cluster_4982	9.96593	2.49331e-08
Cluster_4983	5.64851	0.00077622
Cluster_4987	5.58066	3.15006e-06
Cluster_4990	8.43493	0.00462583
Cluster_4999	7.54832	3.31106e-14
Cluster_5006	5.5504	1.05712e-09
Cluster_5011	6.08955	9.39188e-05
Cluster_5016	12.1694	1.4539e-18
Cluster_5021	-12.2726	5.05859e-23
Cluster_5024	9.96836	1.02461e-15
Cluster_5028	-8.84433	1.0091e-72
Cluster_5030	-16.587	1.92015e-11
Cluster_5031	-7.81445	2.50611e-06
Cluster_5059	5.29561	2.84924e-38
Cluster_5068	11.1836	7.92338e-09
Cluster_5069	5.59717	0.00105826
Cluster_5071	10.7486	0.000327241
Cluster_5077	13.8094	4.53705e-08
Cluster_5082	9.1227	1.01833e-18
Cluster_5085	5.85203	3.18678e-09
Cluster_5094	-14.1721	3.4582e-08
Cluster_5102	-5.56871	0.000234789
Cluster_5103	5.03466	2.74126e-05
Cluster_5107	-5.60817	9.46394e-07
Cluster_5112	5.89831	0.0019773
Cluster_5117	5.64342	1.36052e-08
Cluster_5120	-6.30431	2.57771e-05
Cluster_5133	5.28476	0.000488496
Cluster_5136	5.66975	4.11065e-34
Cluster_5141	5.58898	1.01189e-07
Cluster_5146	-7.26309	0.000482693
Cluster_5147	11.2078	2.98541e-23
Cluster_5148	5.18113	4.31381e-05
Cluster_5150	5.96039	1.82135e-07
Cluster_5151	-5.00723	0.000475257
Cluster_5162	5.48355	0.00158127
Cluster_5163	5.50926	1.18686e-06
Cluster_5168	6.09357	5.05005e-08
Cluster_5183	8.27586	9.95025e-06
Cluster_5190	-5.45706	0.0227479
Cluster_5199	5.51869	1.30733e-05
Cluster_5201	-6.34311	8.35027e-07
Cluster_5203	5.68714	1.21167e-06
Cluster_5204	5.50351	0.0122943
Cluster_5207	5.11395	5.45993e-10
Cluster_5214	-12.1124	1.62545e-10
Cluster_5218	-6.75398	0.0279631
Cluster_5222	5.28599	1.80152e-06
Cluster_5226	5.57065	0.00255547
Cluster_5227	6.79442	9.02883e-11
Cluster_5237	5.80866	6.62574e-19
Cluster_5240	6.36512	7.98262e-14
Cluster_5241	10.1853	9.13895e-11
Cluster_5248	16.9956	0.00477946
Cluster_5249	6.98344	8.3909e-10
Cluster_5258	-15.8748	1.45299e-11
Cluster_5260	5.91148	1.14327e-16
Cluster_5263	5.20999	6.20673e-05
Cluster_5267	9.91617	3.54825e-22
Cluster_5269	7.25332	1.6719e-17
Cluster_5270	5.77495	8.35011e-06
Cluster_5272	6.09229	0.000170048
Cluster_5276	5.85336	1.00402e-15
Cluster_5279	5.49314	3.15343e-05
Cluster_5281	6.0593	4.57938e-05
Cluster_5282	10.7017	1.70573e-08
Cluster_5288	12.5616	2.5558e-06
Cluster_5294	-5.801	0.000254842
Cluster_5295	12.9219	8.42386e-20
Cluster_5313	-10.7196	1.48354e-08
Cluster_5319	6.11536	3.01066e-07
Cluster_5322	7.61892	4.64522e-25
Cluster_5336	5.80517	4.24402e-10
Cluster_5343	5.92941	3.90221e-20
Cluster_5344	-12.0588	0.000279233
Cluster_5351	5.09706	0.00166177
Cluster_5353	-22.2708	4.52003e-07
Cluster_5354	7.40394	9.99539e-07
Cluster_5366	11.6344	1.29093e-06
Cluster_5376	6.55732	1.5439e-16
Cluster_5378	7.20037	8.00878e-10
Cluster_5380	8.94435	1.7604e-10
Cluster_5382	5.32489	2.64452e-11
Cluster_5390	5.16102	4.76795e-13
Cluster_5391	16.2631	3.45608e-37
Cluster_5396	5.02337	5.01434e-05
Cluster_5404	6.71159	7.08193e-13
Cluster_5407	-13.8079	9.84377e-05
Cluster_5408	5.82642	0.000757862
Cluster_5422	17.3309	6.06559e-05
Cluster_5427	11.0511	2.83766e-21
Cluster_5429	6.95744	3.29945e-13
Cluster_5446	15.4246	2.92335e-09
Cluster_5452	6.72475	1.05413e-05
Cluster_5461	9.12824	6.81965e-06
Cluster_5462	17.9918	0.00276197
Cluster_5466	7.90097	7.65581e-06
Cluster_5470	5.77519	1.51668e-08
Cluster_5473	-5.15221	0.000765561
Cluster_5477	-5.68086	2.55301e-06
Cluster_5482	7.16225	7.35964e-06
Cluster_5490	5.23663	1.7424e-06
Cluster_5492	7.79357	7.43393e-16
Cluster_5493	7.37043	5.23757e-13
Cluster_5495	15.2717	2.60226e-09
Cluster_5498	12.1896	8.05875e-07
Cluster_5510	-6.45161	0.0418016
Cluster_5511	5.87595	8.70583e-14
Cluster_5513	6.24282	2.71721e-14
Cluster_5514	-24.6349	1.45888e-12
Cluster_5518	13.3282	1.06003e-10
Cluster_5521	-7.56409	8.27119e-08
Cluster_5530	5.51501	1.15593e-09
Cluster_5531	7.98937	1.82959e-22
Cluster_5542	6.33326	1.87072e-07
Cluster_5546	6.15387	0.00022327
Cluster_5547	-7.34185	1.34671e-09
Cluster_5558	11.2257	2.10723e-52
Cluster_5569	-18.2143	0.024348
Cluster_5570	5.99217	1.85009e-08
Cluster_5575	7.03383	4.28305e-05
Cluster_5579	6.44064	4.20878e-52
Cluster_5585	-7.33448	0.000975536
Cluster_5586	13.4686	1.0652e-13
Cluster_5587	5.3728	2.95785e-09
Cluster_5593	20.6719	0
Cluster_5596	5.66631	1.86466e-06
Cluster_5598	22.3129	2.84973e-72
Cluster_5600	5.12254	5.55574e-06
Cluster_5602	-9.1813	1.72563e-11
Cluster_5606	7.63812	6.32247e-13
Cluster_5608	6.002	4.24561e-13
Cluster_5609	22.9024	3.55926e-30
Cluster_5610	-10.8641	0.000168625
Cluster_5611	11.3139	3.67385e-08
Cluster_5614	20.1707	4.53348e-18
Cluster_5616	63.7968	8.22662e-20
Cluster_5621	7.16301	0.000574914
Cluster_5622	5.51426	1.73158e-05
Cluster_5625	6.66484	2.73774e-08
Cluster_5627	11.5363	5.07403e-10
Cluster_5628	6.94429	3.24513e-10
Cluster_5633	12.9325	5.18798e-15
Cluster_5635	-5.93607	0.00754878
Cluster_5636	-18.018	0.00015592
Cluster_5637	5.71661	0.00133485
Cluster_5647	21.5148	7.70662e-159
Cluster_5648	10.6843	3.63526e-27
Cluster_5651	7.91678	7.00459e-08
Cluster_5654	12.7878	9.01557e-20
Cluster_5658	19.1434	2.32519e-45
Cluster_5660	13.4229	1.98493e-07
Cluster_5665	5.18923	2.85193e-13
Cluster_5670	5.29559	0.000953756
Cluster_5674	5.37959	0.00558149
Cluster_5680	11.4921	1.35506e-20
Cluster_5681	6.07959	1.931e-06
Cluster_5701	-7.26253	9.31099e-05
Cluster_5721	5.5037	0.00288688
Cluster_5725	13.3026	7.30621e-06
Cluster_5729	11.8692	1.79503e-37
Cluster_5761	7.79003	2.06571e-06
Cluster_5766	12.4874	1.91335e-05
Cluster_5774	11.0702	7.3857e-26
Cluster_5775	7.16021	0.000116485
Cluster_5794	6.91724	2.08264e-17
Cluster_5803	-13.5409	0.000103118
Cluster_5807	-10.1359	0.00193192
Cluster_5808	-7.44983	2.57113e-06
Cluster_5809	-11.6156	5.14174e-11
Cluster_5818	5.65199	1.15227e-09
Cluster_5836	5.44299	0.000228755
Cluster_5837	6.32555	5.96063e-07
Cluster_5850	-6.49773	0.000197138
Cluster_5862	-7.25986	0.00040309
Cluster_5863	19.6805	8.98781e-14
Cluster_5878	11.8951	3.00523e-23
Cluster_5879	9.19035	5.44582e-14
Cluster_5880	6.7098	0.000760806
Cluster_5882	-5.34917	6.38412e-08
Cluster_5885	8.1677	3.79302e-11
Cluster_5888	6.15396	7.76178e-06
Cluster_5892	-6.05491	0.0450006
Cluster_5893	-11.2801	2.02854e-08
Cluster_5895	6.90527	4.81808e-10
Cluster_5899	5.14194	0.00107191
Cluster_5919	6.36145	6.82059e-06
Cluster_5924	10.1432	3.96298e-18
Cluster_5926	-5.39898	0.0424673
Cluster_5945	11.4815	4.76231e-21
Cluster_5950	5.9473	1.46235e-11
Cluster_5954	5.37018	0.000177993
Cluster_5957	-12.2681	3.13106e-10
Cluster_5958	12.3209	2.98249e-11
Cluster_5961	5.30366	5.15794e-19
Cluster_5963	5.10537	7.94511e-06
Cluster_5980	13.8631	0.000169914
Cluster_5982	7.11274	3.72101e-38
Cluster_5988	7.58717	6.49418e-17
Cluster_5999	14.9586	2.08305e-43
Cluster_6001	7.34893	2.28477e-07
Cluster_6005	8.23642	1.70811e-07
Cluster_6016	6.20247	2.81012e-10
Cluster_6022	9.81453	9.46346e-09
Cluster_6025	-6.89372	0.00393852
Cluster_6030	-7.86585	0.0195859
Cluster_6034	-18.5841	0.00717328
Cluster_6040	8.96794	1.03788e-06
Cluster_6043	-5.04573	0.015894
Cluster_6056	16.7921	3.77732e-08
Cluster_6064	11.672	3.33341e-09
Cluster_6076	10.0635	2.73084e-32
Cluster_6084	5.16849	0.000116965
Cluster_6088	-5.20855	0.0465963
Cluster_6093	-5.0028	1.16081e-05
Cluster_6096	5.10862	8.43045e-08
Cluster_6098	8.16936	4.69402e-24
Cluster_6107	13.8158	5.91321e-22
Cluster_6111	6.97442	1.67242e-12
Cluster_6114	-12.4674	2.63153e-10
Cluster_6115	6.79265	7.49708e-12
Cluster_6116	6.56218	0.00312307
Cluster_6124	7.81238	1.00361e-21
Cluster_6126	5.19911	1.75205e-11
Cluster_6130	6.52037	2.84944e-10
Cluster_6131	-6.18396	6.99614e-10
Cluster_6139	6.83541	1.65725e-08
Cluster_6143	24.1169	4.38619e-06
Cluster_6145	6.67448	4.56028e-11
Cluster_6146	19.8777	4.39535e-25
Cluster_6151	6.22422	9.14816e-15
Cluster_6152	12.3704	8.34245e-14
Cluster_6154	12.6877	1.48333e-22
Cluster_6160	6.99612	0.00891281
Cluster_6162	17.9665	4.10529e-13
Cluster_6164	13.9051	9.76223e-27
Cluster_6174	9.1484	4.26365e-28
Cluster_6179	8.16328	1.18333e-18
Cluster_6181	5.40861	0.000715909
Cluster_6194	8.40095	3.7072e-05
Cluster_6200	8.3518	1.16821e-06
Cluster_6201	5.79194	5.5833e-14
Cluster_6211	5.88135	1.85905e-12
Cluster_6212	5.93649	2.2997e-11
Cluster_6220	8.71517	7.46958e-21
Cluster_6225	6.50817	0.0445452
Cluster_6238	5.66661	1.30319e-18
Cluster_6239	5.40959	8.31515e-07
Cluster_6242	-15.1701	9.89694e-14
Cluster_6245	10.5759	2.14349e-06
Cluster_6248	7.88573	1.09198e-24
Cluster_6252	7.13728	6.09868e-35
Cluster_6255	8.72947	2.18443e-09
Cluster_6256	5.15003	1.08117e-09
Cluster_6263	5.19177	1.53392e-11
Cluster_6265	-11.8417	1.97322e-23
Cluster_6266	5.37031	0.0143939
Cluster_6268	11.7008	6.28118e-19
Cluster_6275	5.89816	2.73345e-08
Cluster_6276	7.30206	2.97114e-12
Cluster_6284	7.43651	1.16858e-06
Cluster_6286	-7.06415	6.77281e-10
Cluster_6287	9.59116	3.43906e-24
Cluster_6289	6.06564	2.76197e-06
Cluster_6292	6.27526	1.16382e-08
Cluster_6293	5.04119	4.07145e-06
Cluster_6295	17.5571	4.89444e-19
Cluster_6296	5.8677	0.00244429
Cluster_6301	8.5871	6.20066e-13
Cluster_6305	-19.0345	6.49898e-06
Cluster_6309	-16.0645	1.32652e-29
Cluster_6316	-11.8211	0.000143002
Cluster_6317	5.91143	1.63341e-08
Cluster_6320	5.14108	0.042903
Cluster_6322	7.97417	2.39832e-06
Cluster_6326	5.79728	0.00771237
Cluster_6328	8.55229	4.13807e-05
Cluster_6331	-5.28306	6.80361e-07
Cluster_6337	20.613	6.01908e-12
Cluster_6338	-5.78599	0.00121439
Cluster_6339	10.9208	1.26672e-09
Cluster_6342	16.409	7.58125e-06
Cluster_6343	13.5386	1.04808e-14
Cluster_6346	8.6303	1.53767e-24
Cluster_6348	9.59837	1.39911e-09
Cluster_6352	-9.04966	0.000921176
Cluster_6358	10.9847	0.00218331
Cluster_6359	45.2411	1.22145e-14
Cluster_6363	6.0729	5.50621e-06
Cluster_6364	6.3857	1.3159e-07
Cluster_6365	16.1555	9.65614e-11
Cluster_6366	5.22187	2.45633e-14
Cluster_6370	8.43729	6.27627e-07
Cluster_6372	5.48959	1.63667e-09
Cluster_6374	8.71213	1.83557e-23
Cluster_6382	-11.1041	0.00419082
Cluster_6386	5.01211	2.62267e-06
Cluster_6399	6.38529	1.50462e-19
Cluster_6402	-8.06014	2.74126e-05
Cluster_6403	7.02889	4.12947e-12
Cluster_6404	8.47237	2.89158e-10
Cluster_6406	8.88249	1.04514e-11
Cluster_6414	5.20582	0.0169406
Cluster_6415	-9.88114	0.00155885
Cluster_6416	-5.22504	0.00270793
Cluster_6422	6.58469	1.30468e-07
Cluster_6430	-5.13463	5.51334e-07
Cluster_6442	9.53872	3.74313e-06
Cluster_6444	24.7368	0.00647918
Cluster_6448	-7.40262	1.00837e-11
Cluster_6457	9.30365	0.000272267
Cluster_6459	10.9502	2.63926e-08
Cluster_6460	5.2898	1.02128e-05
Cluster_6461	5.12036	7.8799e-07
Cluster_6463	10.0051	1.10135e-10
Cluster_6464	6.85685	2.26584e-15
Cluster_6469	15.2464	1.31615e-48
Cluster_6474	5.3025	1.28291e-13
Cluster_6476	8.54077	1.07662e-18
Cluster_6478	5.50959	1.32758e-06
Cluster_6482	5.32971	0.000255241
Cluster_6483	11.295	4.76208e-06
Cluster_6487	6.5264	1.12163e-07
Cluster_6489	5.76132	7.2946e-19
Cluster_6490	8.50209	1.50269e-13
Cluster_6504	-9.59103	7.0901e-08
Cluster_6506	-5.13308	6.18636e-06
Cluster_6507	6.95862	4.35549e-06
Cluster_6515	5.84351	6.75063e-05
Cluster_6517	7.47071	1.01175e-14
Cluster_6533	-5.3001	8.80397e-09
Cluster_6541	6.63462	1.65795e-29
Cluster_6553	-10.9886	1.88878e-09
Cluster_6554	6.85158	1.44301e-09
Cluster_6561	5.83953	0.00707435
Cluster_6566	6.75928	2.7316e-18
Cluster_6572	5.94683	8.17781e-05
Cluster_6573	-14.0786	5.83857e-36
Cluster_6574	-8.80639	4.42907e-05
Cluster_6580	8.25287	2.24677e-22
Cluster_6585	5.15495	0.00014669
Cluster_6587	-27.1138	0.00158525
Cluster_6594	9.09339	3.16433e-22
Cluster_6601	-24.5525	1.50366e-08
Cluster_6610	5.49201	0.0468827
Cluster_6611	6.47572	4.56851e-05
Cluster_6612	-5.90945	9.62946e-09
Cluster_6613	6.04697	0.000294091
Cluster_6619	7.41948	1.21049e-17
Cluster_6622	7.46567	7.05149e-15
Cluster_6625	5.51399	4.73775e-07
Cluster_6626	5.37075	0.000845064
Cluster_6632	8.62359	7.30032e-15
Cluster_6639	20.7166	1.64399e-77
Cluster_6640	10.0374	3.18822e-12
Cluster_6645	-7.38682	1.75084e-07
Cluster_6649	-13.1774	0.000413669
Cluster_6650	8.75546	0.000599352
Cluster_6660	11.2151	3.12553e-18
Cluster_6666	6.68544	1.94315e-08
Cluster_6669	-5.13548	4.09623e-05
Cluster_6670	-6.95845	0.00806316
Cluster_6673	6.25099	1.12401e-18
Cluster_6677	-5.44606	2.96391e-06
Cluster_6681	6.79619	2.58252e-06
Cluster_6687	5.23729	1.15098e-07
Cluster_6693	5.64306	7.87789e-09
Cluster_6695	-12.6498	1.2103e-19
Cluster_6702	5.37554	1.1276e-09
Cluster_6713	15.3435	2.02701e-33
Cluster_6714	16.1538	0.0225403
Cluster_6717	5.43296	5.95126e-12
Cluster_6719	8.85766	1.67499e-11
Cluster_6721	10.0043	1.27923e-18
Cluster_6730	11.4512	5.25455e-07
Cluster_6731	6.92624	1.87506e-06
Cluster_6737	10.2971	5.27226e-11
Cluster_6740	5.32174	1.07313e-20
Cluster_6742	7.37438	0.00206237
Cluster_6747	5.37975	0.00477716
Cluster_6752	7.47827	2.8581e-05
Cluster_6757	6.05803	7.16717e-14
Cluster_6761	-8.22269	0.000491736
Cluster_6764	-6.83592	0.000282228
Cluster_6767	6.30079	7.12548e-26
Cluster_6774	-5.71352	5.13173e-05
Cluster_6779	-6.52154	0.0012031
Cluster_6785	6.44269	7.03868e-12
Cluster_6786	9.78924	1.79962e-06
Cluster_6787	6.49744	0.000206451
Cluster_6789	6.55165	2.38721e-09
Cluster_6791	-9.54015	7.95757e-06
Cluster_6792	5.14428	1.69487e-07
Cluster_6793	-5.57789	0.00948274
Cluster_6794	-23.191	2.00141e-11
Cluster_6805	5.72693	0.00742421
Cluster_6808	5.21408	1.98918e-11
Cluster_6811	7.8632	3.3369e-08
Cluster_6813	-7.64218	5.57381e-07
Cluster_6818	5.27161	1.34683e-05
Cluster_6820	8.57974	0.00240954
Cluster_6821	8.3028	8.08827e-11
Cluster_6825	7.98805	1.22694e-67
Cluster_6836	8.60851	6.05185e-21
Cluster_6840	5.50443	0.00148717
Cluster_6844	35.7626	2.09051e-20
Cluster_6846	13.0014	0.000218023
Cluster_6848	-5.61287	8.60192e-07
Cluster_6854	9.02925	5.4706e-12
Cluster_6860	12.0718	1.95518e-14
Cluster_6863	7.31914	1.22546e-09
Cluster_6867	-15.8456	2.58173e-11
Cluster_6870	7.02137	1.92392e-17
Cluster_6873	5.43405	4.73637e-07
Cluster_6875	-7.59343	9.35799e-05
Cluster_6876	13.2874	1.32352e-05
Cluster_6881	5.18708	0.0133518
Cluster_6884	10.0878	3.06862e-05
Cluster_6890	8.05367	8.18139e-06
Cluster_6893	6.50257	2.09602e-05
Cluster_6894	5.30226	0.000587661
Cluster_6898	7.06017	0.00607163
Cluster_6900	5.20731	0.0102253
Cluster_6909	5.49197	2.66575e-12
Cluster_6911	5.14168	1.14291e-14
Cluster_6917	5.40341	0.00187127
Cluster_6921	-7.15663	7.76734e-06
Cluster_6924	6.37427	9.97874e-10
Cluster_6927	6.12399	0.00021408
Cluster_6928	-18.1133	2.19094e-06
Cluster_6930	9.01065	4.70721e-34
Cluster_6932	20.924	3.20585e-25
Cluster_6933	12.4887	6.16564e-29
Cluster_6936	-11.286	3.66827e-11
Cluster_6940	5.72906	0.00891019
Cluster_6953	5.64763	6.05998e-05
Cluster_6962	5.014	1.7504e-07
Cluster_6964	-7.10645	1.81809e-08
Cluster_6965	-7.23533	3.60897e-05
Cluster_6970	13.843	3.89874e-07
Cluster_6972	5.37108	0.000371068
Cluster_6985	5.61387	1.67134e-13
Cluster_6988	8.78757	7.02609e-18
Cluster_6989	5.20316	2.40878e-05
Cluster_6991	8.10337	5.42172e-13
Cluster_6992	8.71891	1.21874e-11
Cluster_6995	12.8642	0.00720754
Cluster_6998	5.87556	0.00454875
Cluster_7003	19.3313	1.12222e-113
Cluster_7004	9.67446	1.10977e-16
Cluster_7005	5.03834	1.69733e-05
Cluster_7006	-8.87947	8.8171e-05
Cluster_7008	6.04061	2.15049e-05
Cluster_7010	5.62036	1.78076e-07
Cluster_7014	10.0864	7.2562e-09
Cluster_7016	8.62452	5.94379e-15
Cluster_7017	12.9259	2.17973e-24
Cluster_7020	5.08477	0.00032013
Cluster_7021	6.34308	2.89536e-09
Cluster_7023	13.5349	3.90468e-14
Cluster_7025	7.22274	1.27295e-12
Cluster_7029	8.87612	2.9336e-07
Cluster_7033	7.45887	1.06694e-24
Cluster_7035	-14.2291	2.55299e-09
Cluster_7041	-18.9183	0.000826133
Cluster_7042	5.98817	6.86564e-12
Cluster_7045	7.17418	1.83117e-08
Cluster_7049	-6.23303	7.56595e-05
Cluster_7053	-7.93057	3.78947e-21
Cluster_7064	-5.93498	1.81816e-05
Cluster_7070	6.97503	3.64382e-06
Cluster_7074	9.47453	0.000292536
Cluster_7076	5.19122	3.26822e-12
Cluster_7078	6.98068	2.00192e-22
Cluster_7080	6.74627	4.16673e-10
Cluster_7083	5.53218	0.00109445
Cluster_7085	5.32291	6.04755e-08
Cluster_7091	6.92851	1.5885e-06
Cluster_7097	7.72275	1.80145e-07
Cluster_7098	10.0206	8.52123e-17
Cluster_7101	6.25272	1.6332e-07
Cluster_7102	-5.49487	0.0364112
Cluster_7105	10.9024	0.00118059
Cluster_7107	5.12484	4.48645e-10
Cluster_7108	6.76857	0.000664498
Cluster_7109	19.0055	1.55867e-06
Cluster_7111	16.4347	0.00109498
Cluster_7117	5.36285	6.47179e-09
Cluster_7121	-5.77644	1.89233e-06
Cluster_7126	8.7174	8.04384e-12
Cluster_7127	5.52546	1.19062e-05
Cluster_7131	5.13042	8.87938e-07
Cluster_7135	9.25701	2.90024e-12
Cluster_7145	5.95177	1.79977e-07
Cluster_7149	8.04473	6.73071e-06
Cluster_7151	8.45401	4.50266e-05
Cluster_7153	-5.33103	1.13969e-10
Cluster_7155	5.77526	4.64438e-09
Cluster_7160	10.9225	2.1561e-18
Cluster_7162	5.30379	1.05228e-06
Cluster_7168	-36.2283	0.000713198
Cluster_7172	14.6716	0.00041921
Cluster_7174	7.71737	1.80274e-06
Cluster_7176	13.5866	1.70569e-27
Cluster_7179	5.70642	4.36409e-11
Cluster_7180	-5.66435	4.54889e-11
Cluster_7181	-6.36515	4.26955e-07
Cluster_7182	7.14296	1.06515e-15
Cluster_7186	-14.3505	6.49339e-05
Cluster_7188	7.11584	3.41155e-05
Cluster_7198	8.98197	7.50569e-09
Cluster_7202	5.60178	8.44335e-07
Cluster_7216	5.19995	0.000375628
Cluster_7230	5.42685	0.000411631
Cluster_7233	10.9191	1.10891e-21
Cluster_7237	6.60242	7.45684e-17
Cluster_7242	11.9528	0.000270652
Cluster_7255	9.39296	2.65113e-11
Cluster_7268	7.62205	9.34456e-11
Cluster_7269	-17.5605	1.2583e-23
Cluster_7270	6.33752	2.2009e-11
Cluster_7276	6.65877	0.000800307
Cluster_7295	6.51736	2.2162e-06
Cluster_7296	8.65974	2.96319e-15
Cluster_7298	6.6079	9.23235e-10
Cluster_7306	-16.5978	4.57856e-08
Cluster_7307	8.36781	0.000702784
Cluster_7310	5.44091	0.00100943
Cluster_7311	6.58206	5.25209e-12
Cluster_7315	6.39499	6.94202e-35
Cluster_7325	-8.04379	1.83953e-07
Cluster_7328	15.4118	3.82416e-16
Cluster_7329	52.6582	0.00159872
Cluster_7330	5.92279	0.00878198
Cluster_7340	7.49085	0.000599352
Cluster_7345	5.54992	2.39072e-08
Cluster_7348	-8.85355	5.34212e-07
Cluster_7349	9.92191	2.65896e-06
Cluster_7350	-36.2935	8.10085e-05
Cluster_7358	9.02071	8.75218e-05
Cluster_7360	-6.64764	0.00142204
Cluster_7362	10.4846	2.881e-20
Cluster_7364	7.62904	4.67187e-10
Cluster_7366	5.75538	9.54791e-10
Cluster_7368	5.1858	2.13451e-15
Cluster_7375	-12.6972	0.0427192
Cluster_7378	5.51874	4.33341e-07
Cluster_7383	-39.5002	5.39515e-29
Cluster_7385	7.63408	3.14031e-06
Cluster_7388	6.04624	4.41721e-07
Cluster_7400	6.52428	1.15035e-08
Cluster_7407	7.44501	4.39602e-05
Cluster_7410	5.89793	9.35251e-10
Cluster_7416	7.74667	4.48701e-10
Cluster_7419	6.23888	0.00597611
Cluster_7424	6.47787	5.76155e-07
Cluster_7429	6.00032	3.94212e-12
Cluster_7430	6.37904	4.50194e-07
Cluster_7432	5.63385	0.000483176
Cluster_7433	6.00266	0.000321158
Cluster_7443	11.1119	8.50124e-16
Cluster_7448	-17.1515	1.74108e-06
Cluster_7462	16.6667	7.14814e-08
Cluster_7475	11.7313	1.02727e-17
Cluster_7478	-5.02143	0.0332455
Cluster_7481	7.05495	8.41948e-23
Cluster_7482	7.31308	3.46224e-08
Cluster_7483	17.1787	0.00461901
Cluster_7485	5.25559	7.9834e-12
Cluster_7492	5.86595	1.46204e-09
Cluster_7498	5.37299	3.49779e-06
Cluster_7499	-11.6387	4.23387e-16
Cluster_7502	13.5572	5.04032e-11
Cluster_7504	8.25527	9.79657e-08
Cluster_7506	8.47834	1.56923e-07
Cluster_7514	6.64703	2.95994e-15
Cluster_7515	5.5717	2.74997e-07
Cluster_7516	6.06878	2.57636e-05
Cluster_7519	5.00793	1.04253e-16
Cluster_7520	-5.50082	0.00341754
Cluster_7522	-11.4643	1.22484e-06
Cluster_7525	6.07879	1.42502e-06
Cluster_7526	-17.5578	5.8399e-17
Cluster_7528	5.66179	0.00278864
Cluster_7540	16.7436	8.72907e-25
Cluster_7541	8.01508	5.31192e-05
Cluster_7542	5.8861	7.93307e-05
Cluster_7555	5.27862	2.45794e-07
Cluster_7557	-5.80904	0.0377338
Cluster_7558	8.15432	2.06011e-17
Cluster_7560	-6.20211	0.00142623
Cluster_7562	8.07686	1.24142e-13
Cluster_7564	5.80422	5.34489e-06
Cluster_7568	18.8943	3.48071e-17
Cluster_7577	5.60349	0.0214896
Cluster_7579	9.92173	5.35611e-31
Cluster_7581	5.85719	4.32847e-06
Cluster_7583	7.20906	1.86189e-05
Cluster_7592	-8.06175	5.22456e-05
Cluster_7594	5.13038	5.12104e-05
Cluster_7599	10.1967	8.18531e-13
Cluster_7602	-5.2876	5.66709e-06
Cluster_7625	5.90504	2.3664e-18
Cluster_7630	-9.40755	1.41109e-05
Cluster_7631	11.0971	4.92883e-46
Cluster_7633	8.35545	5.77911e-07
Cluster_7635	8.01449	0.0220762
Cluster_7639	6.01889	4.36537e-09
Cluster_7640	6.1005	1.11449e-10
Cluster_7642	15.7472	4.51006e-25
Cluster_7654	6.85058	1.50185e-08
Cluster_7655	5.3604	0.00677621
Cluster_7657	5.35332	3.85629e-10
Cluster_7659	18.9499	1.53791e-24
Cluster_7670	7.31905	5.36987e-10
Cluster_7671	12.7659	3.70212e-24
Cluster_7673	8.27308	3.86175e-13
Cluster_7677	5.3095	1.10879e-05
Cluster_7679	5.84743	0.00141893
Cluster_7682	8.34362	8.25433e-08
Cluster_7683	5.18508	0.0346254
Cluster_7685	9.35907	1.63637e-10
Cluster_7686	5.81669	9.17982e-07
Cluster_7689	8.65993	8.77875e-06
Cluster_7695	-6.16676	0.000888841
Cluster_7697	-6.77665	1.1692e-06
Cluster_7699	7.67204	3.69825e-08
Cluster_7703	7.16774	2.67327e-09
Cluster_7711	6.7722	0.00080153
Cluster_7713	11.0552	8.1568e-20
Cluster_7718	6.41581	1.49151e-16
Cluster_7720	7.64008	3.86201e-14
Cluster_7721	6.33983	1.48652e-05
Cluster_7722	6.39106	0.000151501
Cluster_7727	5.04912	1.90362e-07
Cluster_7729	-5.61048	0.0167033
Cluster_7743	8.0799	7.36314e-19
Cluster_7744	5.31533	0.000153234
Cluster_7753	61.3559	3.91547e-12
Cluster_7759	8.37745	1.32714e-19
Cluster_7760	12.4179	1.65526e-22
Cluster_7761	6.43352	9.16854e-09
Cluster_7782	5.62898	0.00109882
Cluster_7784	5.22198	1.52101e-06
Cluster_7786	6.63827	2.34916e-05
Cluster_7789	9.05388	4.50861e-11
Cluster_7795	6.92961	2.41401e-10
Cluster_7798	-7.16552	2.92311e-05
Cluster_7819	5.38566	6.32249e-08
Cluster_7827	5.7615	4.487e-16
Cluster_7831	6.4339	1.49079e-14
Cluster_7833	7.83654	3.77732e-08
Cluster_7838	10.1406	4.21612e-11
Cluster_7848	5.59736	2.32328e-05
Cluster_7857	5.23564	0.000355116
Cluster_7858	-40.6203	4.06307e-80
Cluster_7859	-5.74778	6.32634e-06
Cluster_7861	6.44751	2.67584e-12
Cluster_7863	7.00539	3.53771e-22
Cluster_7864	8.67064	1.74121e-11
Cluster_7869	5.04814	1.23076e-07
Cluster_7873	8.53027	0.000689919
Cluster_7880	6.63407	5.85561e-12
Cluster_7887	-11.5536	1.06752e-40
Cluster_7890	6.29095	5.64492e-05
Cluster_7892	13.2287	1.20269e-40
Cluster_7897	-15.5706	2.03682e-34
Cluster_7900	10.3763	3.91388e-07
Cluster_7904	7.1033	3.22651e-13
Cluster_7912	19.1752	3.4419e-39
Cluster_7915	9.34314	2.15178e-11
Cluster_7917	5.45576	8.20356e-06
Cluster_7918	8.89215	0.00121248
Cluster_7920	5.79648	1.93378e-05
Cluster_7922	6.52742	4.02065e-12
Cluster_7927	-5.66494	0.000541745
Cluster_7934	5.77538	4.16648e-10
Cluster_7935	9.75173	2.3224e-18
Cluster_7940	-40.919	1.43156e-85
Cluster_7952	5.86437	0.00443863
Cluster_7953	5.63322	0.000270244
Cluster_7958	5.28455	0.0339829
Cluster_7968	5.58547	1.94376e-13
Cluster_7972	-14.6599	2.58897e-17
Cluster_7977	17.5637	5.58679e-64
Cluster_7983	6.70861	1.7146e-07
Cluster_7991	10.302	6.27638e-32
Cluster_8002	6.4283	1.17469e-10
Cluster_8008	5.00576	2.03564e-05
Cluster_8011	6.22154	3.46818e-09
Cluster_8012	7.5878	2.44335e-28
Cluster_8018	31.7264	1.55447e-31
Cluster_8031	7.76024	3.46385e-20
Cluster_8034	8.74435	2.57132e-20
Cluster_8042	6.2214	3.25539e-07
Cluster_8044	5.52266	0.00032827
Cluster_8047	20.456	2.80718e-12
Cluster_8049	9.47653	2.45826e-07
Cluster_8053	21.5944	1.02818e-35
Cluster_8059	-33.923	1.96984e-17
Cluster_8062	6.55152	2.53899e-10
Cluster_8063	6.23414	0.00058024
Cluster_8068	6.49574	0.000490966
Cluster_8070	-6.05278	2.63387e-08
Cluster_8097	8.04619	1.14066e-06
Cluster_8098	9.91173	2.87217e-08
Cluster_8110	5.92565	5.9773e-11
Cluster_8111	15.2765	5.50399e-06
Cluster_8118	-8.26135	4.123e-05
Cluster_8121	19.8908	2.94522e-65
Cluster_8128	5.22073	0.000724351
Cluster_8130	6.13369	1.06311e-05
Cluster_8136	-13.2791	8.63847e-12
Cluster_8139	19.5916	4.52683e-07
Cluster_8147	-6.29635	2.05989e-05
Cluster_8151	7.43006	1.24057e-33
Cluster_8162	6.15482	1.08085e-12
Cluster_8163	11.2289	3.29793e-10
Cluster_8170	8.19605	1.33315e-31
Cluster_8173	6.69471	1.15927e-08
Cluster_8175	5.51609	7.07823e-06
Cluster_8180	5.0973	0.00486735
Cluster_8186	8.40106	1.98212e-14
Cluster_8188	7.58123	4.94858e-09
Cluster_8191	8.65375	6.8021e-06
Cluster_8195	11.1829	6.87511e-17
Cluster_8206	5.28508	6.30944e-06
Cluster_8207	7.68191	4.15687e-06
Cluster_8212	26.3814	1.72457e-12
Cluster_8227	6.69769	3.18392e-05
Cluster_8235	-12.5658	1.29195e-07
Cluster_8239	5.30493	1.30554e-18
Cluster_8241	5.35293	5.3195e-06
Cluster_8250	5.25856	1.38617e-12
Cluster_8253	6.42868	7.99099e-15
Cluster_8257	-28.5683	2.57915e-15
Cluster_8265	7.92448	0.000122366
Cluster_8266	10.9396	5.08788e-23
Cluster_8267	20.5752	1.31825e-27
Cluster_8271	10.6357	2.32747e-23
Cluster_8272	-5.33426	0.02369
Cluster_8275	5.98634	4.89077e-08
Cluster_8276	7.25141	7.23343e-20
Cluster_8280	5.33201	6.19564e-10
Cluster_8281	8.60627	0.00865912
Cluster_8283	8.9873	1.85973e-07
Cluster_8284	5.79176	1.76781e-12
Cluster_8291	6.3267	1.60868e-17
Cluster_8293	-10.5048	0.000157798
Cluster_8295	-7.88593	0.000103436
Cluster_8307	8.39669	8.46543e-05
Cluster_8310	-11.3636	7.97723e-05
Cluster_8311	-13.5706	2.98973e-11
Cluster_8314	5.03383	2.1494e-08
Cluster_8322	7.4399	3.65214e-05
Cluster_8337	5.47429	1.06679e-11
Cluster_8338	7.28252	5.6054e-23
Cluster_8340	6.12316	2.14917e-08
Cluster_8341	5.41767	0.00112764
Cluster_8343	5.25829	0.000499546
Cluster_8349	6.8658	0.0010488
Cluster_8351	8.57635	2.92895e-06
Cluster_8354	5.53615	3.05183e-17
Cluster_8358	42.1482	1.1127e-23
Cluster_8367	7.09145	4.29523e-09
Cluster_8368	5.53188	1.86282e-19
Cluster_8370	6.46254	8.13779e-17
Cluster_8371	5.59439	2.74653e-16
Cluster_8384	5.343	0.000100125
Cluster_8386	5.60797	0.000231456
Cluster_8391	-15.9126	4.27968e-07
Cluster_8392	5.53727	1.48324e-05
Cluster_8395	-9.98131	2.97244e-15
Cluster_8396	7.65696	4.61888e-11
Cluster_8397	5.26341	0.000251144
Cluster_8399	6.18596	2.09201e-05
Cluster_8400	5.93251	1.62132e-17
Cluster_8407	7.70219	0.00563888
Cluster_8412	20.9196	1.02534e-19
Cluster_8413	5.82215	1.38259e-14
Cluster_8420	6.37966	9.02747e-10
Cluster_8422	7.39914	2.31274e-07
Cluster_8427	7.59463	3.26467e-10
Cluster_8429	-23.0336	1.08402e-23
Cluster_8433	6.47867	9.69969e-06
Cluster_8437	5.2239	4.70414e-05
Cluster_8438	7.86134	5.03905e-16
Cluster_8439	-5.57651	0.0360856
Cluster_8440	7.98432	1.34253e-07
Cluster_8442	5.23554	0.00938785
Cluster_8444	-6.97585	0.0186872
Cluster_8448	6.23541	0.00123289
Cluster_8449	16.2845	2.39018e-58
Cluster_8450	-32.3529	0.00810722
Cluster_8453	-12.0339	2.11898e-10
Cluster_8454	5.32176	0.00731546
Cluster_8460	-6.57617	0.0070143
Cluster_8473	-6.66554	0.000661824
Cluster_8475	11.014	2.90065e-07
Cluster_8480	12.1552	1.45944e-29
Cluster_8483	-5.24363	0.0115999
Cluster_8486	-8.96266	1.26442e-08
Cluster_8489	15.9484	8.66367e-33
Cluster_8495	28.7375	2.17724e-30
Cluster_8500	62.0833	5.10993e-12
Cluster_8504	-7.39071	5.24252e-10
Cluster_8507	12.8375	1.39935e-10
Cluster_8508	-6.70644	0.00919326
Cluster_8512	6.01242	2.31702e-07
Cluster_8516	5.21361	1.23929e-05
Cluster_8518	10.635	1.74608e-31
Cluster_8521	16.4614	1.56103e-12
Cluster_8524	6.42806	6.72766e-10
Cluster_8542	5.92397	1.56362e-13
Cluster_8546	-7.34635	0.0196026
Cluster_8547	6.78177	0.0108381
Cluster_8551	21.5373	1.28895e-08
Cluster_8552	-5.57185	0.014216
Cluster_8553	6.07728	4.83969e-05
Cluster_8554	22.6258	1.90552e-26
Cluster_8555	-15.2667	2.65062e-08
Cluster_8561	8.94837	2.6949e-14
Cluster_8566	9.04413	5.18821e-08
Cluster_8569	17.0803	4.98973e-15
Cluster_8572	12.6511	2.48885e-30
Cluster_8583	-28.3333	0.00314405
Cluster_8596	-7.70293	4.29686e-32
Cluster_8613	5.0525	1.0975e-08
Cluster_8614	5.18172	6.85936e-05
Cluster_8617	10.1539	1.42303e-24
Cluster_8619	7.54841	3.11655e-14
Cluster_8625	25.0301	6.49244e-77
Cluster_8630	16.2758	1.22302e-06
Cluster_8631	-7.01638	9.78125e-07
Cluster_8655	7.45246	1.75351e-18
Cluster_8662	5.66643	0.000263734
Cluster_8663	26.7017	6.28336e-11
Cluster_8674	5.35176	3.30517e-14
Cluster_8675	-10.1095	0.000206268
Cluster_8676	5.49029	1.0882e-11
Cluster_8678	18.9547	2.52661e-07
Cluster_8680	-5.47616	2.48951e-05
Cluster_8689	9.78593	1.94106e-07
Cluster_8701	10.1574	0.012648
Cluster_8705	5.47405	4.53896e-08
Cluster_8710	6.21621	0.0014758
Cluster_8714	-14.0837	1.12487e-16
Cluster_8726	8.11011	6.59994e-28
Cluster_8732	5.31741	7.17388e-06
Cluster_8734	-15.8756	0.0134152
Cluster_8737	7.99566	4.60324e-15
Cluster_8746	5.20494	4.13469e-05
Cluster_8748	10.104	2.18688e-25
Cluster_8753	-15.5606	4.79268e-25
Cluster_8756	7.54319	1.94293e-16
Cluster_8757	7.12509	0.00387896
Cluster_8758	-8.69436	4.58068e-06
Cluster_8759	8.44702	1.30877e-12
Cluster_8760	6.55358	1.88702e-13
Cluster_8763	-7.29498	3.62749e-09
Cluster_8768	5.41713	0.00530645
Cluster_8772	12.9671	2.25305e-23
Cluster_8778	5.75854	1.58854e-07
Cluster_8784	5.71741	1.73158e-05
Cluster_8794	7.13655	0.00273057
Cluster_8795	5.62622	1.75149e-22
Cluster_8814	-16.3931	0.000165278
Cluster_8819	-21.425	6.741e-11
Cluster_8831	6.21437	2.42066e-10
Cluster_8836	-10.8753	3.11655e-14
Cluster_8838	6.4575	9.27902e-10
Cluster_8848	13.0606	2.11351e-29
Cluster_8849	5.9014	1.79648e-08
Cluster_8852	-9.95272	0.00137206
Cluster_8856	17.7718	1.08916e-22
Cluster_8877	7.80529	1.64918e-07
Cluster_8893	8.3881	1.81115e-18
Cluster_8894	-19.7861	1.78493e-27
Cluster_8899	9.8414	3.17544e-15
Cluster_8900	-21.7601	1.96482e-14
Cluster_8915	5.02014	0.0154123
Cluster_8919	5.26289	8.08414e-07
Cluster_8921	-9.49218	0.000883861
Cluster_8926	13.9072	9.68958e-16
Cluster_8927	-6.26641	0.0138282
Cluster_8928	8.94662	1.80551e-10
Cluster_8931	5.12057	3.41913e-08
Cluster_8933	-7.05026	1.83949e-07
Cluster_8937	6.41011	1.34411e-11
Cluster_8938	5.02588	5.41322e-05
Cluster_8940	5.55282	1.44523e-08
Cluster_8944	-6.67495	0.00350419
Cluster_8945	-5.1853	0.0285746
Cluster_8952	7.23242	0.00583965
Cluster_8956	-10.2691	2.67578e-08
Cluster_8961	-20.8617	1.64162e-12
Cluster_8963	-17.7902	1.86984e-21
Cluster_8973	-52	1.59836e-22
Cluster_8977	5.02809	9.33703e-06
Cluster_8981	6.07743	6.87814e-08
Cluster_8984	8.57564	2.99128e-09
Cluster_8987	9.05818	5.56197e-15
Cluster_8989	-6.80153	0.000156575
Cluster_9000	-5.56156	7.59881e-05
Cluster_9002	-7.18068	4.02402e-09
Cluster_9011	6.3614	5.83561e-06
Cluster_9012	12.5203	1.97619e-15
Cluster_9014	7.98881	0.000346434
Cluster_9019	5.32616	3.66582e-07
Cluster_9024	-16.0888	3.17701e-10
Cluster_9036	7.04143	3.56066e-13
Cluster_9038	7.05693	2.4587e-05
Cluster_9039	5.26077	4.89027e-08
Cluster_9052	8.74367	1.71802e-05
Cluster_9055	6.86363	4.87773e-13
Cluster_9057	8.29742	7.30758e-10
Cluster_9065	12.9536	7.0098e-26
Cluster_9068	7.31114	0.000297922
Cluster_9070	6.23106	0.000190014
Cluster_9071	7.10846	8.40571e-08
Cluster_9079	5.32244	4.04192e-06
Cluster_9080	-16.1911	1.64024e-19
Cluster_9083	7.39324	1.15953e-05
Cluster_9084	11.1849	5.28783e-10
Cluster_9092	-11.1834	1.03923e-09
Cluster_9109	6.78139	0.000320869
Cluster_9110	5.40071	0.00015939
Cluster_9124	6.12385	2.50545e-07
Cluster_9125	5.05933	1.00558e-12
Cluster_9136	6.42101	1.99831e-07
Cluster_9137	-10.1388	0.0011982
Cluster_9138	8.58944	3.87633e-09
Cluster_9142	19.7313	5.91202e-70
Cluster_9144	6.58416	8.31304e-16
Cluster_9146	-7.58838	0.008189
Cluster_9147	-25.9359	1.03263e-16
Cluster_9152	-7.54241	9.65449e-05
Cluster_9154	7.52643	0.0100753
Cluster_9160	5.3568	2.18073e-15
Cluster_9163	-17.5593	9.89979e-08
Cluster_9185	10.4922	2.7837e-137
Cluster_9189	-6.02241	0.0363176
Cluster_9193	-10.0378	4.62535e-14
Cluster_9195	5.59043	6.13485e-05
Cluster_9206	-7.19158	7.0586e-13
Cluster_9211	11.027	1.72534e-10
Cluster_9214	-5.79362	0.00833081
Cluster_9221	29.7057	5.9307e-31
Cluster_9223	5.76794	5.82657e-13
Cluster_9225	6.20953	3.13853e-11
Cluster_9226	7.05231	0.00509152
Cluster_9228	7.39802	0.0150167
Cluster_9233	8.23646	0.000720937
Cluster_9235	13.0273	6.05564e-10
Cluster_9243	8.57399	1.06459e-07
Cluster_9252	13.8216	1.81788e-07
[truncated: 4,582 more rows]

## Sheet: 4H
Supplementary Table 4H. sCTGR differentially methylated (PHYB1B2 IG x WT IG)
Cluster_ID	%diff_methyl	FDR
Cluster_10	-10.3336	0
Cluster_11	-32.4255	0
Cluster_16	-9.97461	1.92799e-177
Cluster_17	-26.2766	3.94522e-32
Cluster_18	-10.7702	0
Cluster_22	8.19263	2.23363e-43
Cluster_26	-5.77106	2.26023e-06
Cluster_29	-11.8139	0
Cluster_30	-10.0275	0
Cluster_40	-16.1249	0
Cluster_41	-18.745	3.24852e-124
Cluster_44	-18.571	0
Cluster_45	-9.66039	4.32232e-07
Cluster_46	-13.2892	1.51766e-18
Cluster_47	-5.2793	1.58512e-40
Cluster_50	-10.8945	4.6749e-09
Cluster_51	-13.4911	0.003143
Cluster_52	-16.6854	0
Cluster_53	-11.0983	0
Cluster_55	-19.1722	1.39723e-05
Cluster_57	-20.6605	5.99582e-16
Cluster_58	-19.0143	6.08893e-151
Cluster_59	-13.6369	3.71033e-199
Cluster_60	-10.9776	3.41549e-276
Cluster_63	-5.83754	9.61859e-05
Cluster_64	-20.1492	1.15474e-40
Cluster_65	-13.4154	0
Cluster_68	10.3361	0.000141547
Cluster_70	-12.5486	2.22801e-209
Cluster_72	-7.94346	8.05581e-05
Cluster_73	-15.436	0
Cluster_74	9.66779	8.68419e-14
Cluster_75	-10.9795	0
Cluster_76	-5.01442	1.188e-21
Cluster_79	7.44172	5.49534e-07
Cluster_80	5.00983	2.18676e-14
Cluster_93	-8.64533	1.53403e-95
Cluster_107	7.38029	1.86358e-25
Cluster_126	6.44353	4.90685e-57
Cluster_127	6.63975	1.47483e-54
Cluster_128	5.23555	4.59324e-43
Cluster_129	5.91696	9.54697e-13
Cluster_131	5.04818	0.00378367
Cluster_143	7.47527	5.70991e-24
Cluster_147	5.38178	5.42455e-10
Cluster_155	-10.1047	0.0109838
Cluster_156	24.8868	1.45536e-06
Cluster_157	-12.0899	8.29789e-40
Cluster_167	-6.4347	0.0123838
Cluster_168	-5.14161	0.00210358
Cluster_181	10.1213	3.28654e-14
Cluster_189	6.12511	1.18729e-07
Cluster_208	5.64826	8.03332e-11
Cluster_214	-7.9277	0.00883842
Cluster_216	-12.3275	0
Cluster_217	-8.10316	3.78202e-76
Cluster_222	-5.24511	0.000531479
Cluster_226	5.1259	9.63633e-21
Cluster_229	-31.0626	0
Cluster_231	-6.95987	5.98626e-131
Cluster_237	-5.95699	3.27903e-06
Cluster_243	9.72764	2.97219e-12
Cluster_244	8.56787	2.91812e-11
Cluster_245	7.86874	3.08472e-07
Cluster_246	-7.16251	2.05076e-73
Cluster_249	8.57163	4.28973e-24
Cluster_258	7.06629	4.60607e-08
Cluster_265	7.09406	2.19092e-13
Cluster_266	7.20339	1.06214e-07
Cluster_273	17.9815	0.000145271
Cluster_277	-5.18991	1.50066e-66
Cluster_278	6.23553	2.00224e-14
Cluster_279	11.2447	0.000245802
Cluster_282	5.25415	3.24979e-16
Cluster_294	5.19064	0.00111061
Cluster_297	-6.97599	3.48883e-05
Cluster_308	-5.66897	1.61259e-301
Cluster_310	6.65616	4.35909e-30
Cluster_311	5.92816	3.59264e-22
Cluster_313	-11.1257	0
Cluster_315	-6.19471	0.0214672
Cluster_327	7.72785	2.8167e-20
Cluster_331	-5.70661	4.35543e-07
Cluster_358	11.5006	1.48408e-05
Cluster_364	-5.68979	0.0132937
Cluster_365	7.01975	2.29982e-06
Cluster_372	9.90605	0.00964389
Cluster_373	-13.3468	2.05326e-23
Cluster_378	6.08319	5.23649e-21
Cluster_383	5.42843	0.000208876
Cluster_384	-12.8405	6.26804e-05
Cluster_388	5.18785	6.60298e-12
Cluster_390	-6.86093	0.00848573
Cluster_396	8.55343	2.8222e-10
Cluster_403	18.5817	8.79972e-28
Cluster_415	-12.4896	9.58185e-10
Cluster_417	-15.5826	1.43079e-07
Cluster_423	-6.21725	0.000380216
Cluster_424	-5.30965	0.00535152
Cluster_428	-5.95636	0.00145483
Cluster_432	5.21536	9.88753e-08
Cluster_442	7.7888	0.000140443
Cluster_444	7.82892	4.48373e-16
Cluster_445	-5.08466	4.06273e-08
Cluster_448	8.33411	1.52381e-09
Cluster_451	5.04818	0.000448934
Cluster_452	-8.50331	0.000198737
Cluster_454	6.4924	0.000636997
Cluster_471	5.89235	2.87279e-06
Cluster_476	13.0241	1.63337e-11
Cluster_477	6.94536	0.0244389
Cluster_478	6.82042	0.0318851
Cluster_480	-6.12222	0.0223999
Cluster_482	9.84013	9.1779e-10
Cluster_483	-5.83588	2.25104e-05
Cluster_487	-5.38112	2.97234e-05
Cluster_488	5.25474	0.000806028
Cluster_490	6.53658	2.22391e-15
Cluster_492	-5.69444	0.02764
Cluster_493	6.33478	0.0055759
Cluster_495	7.80377	9.33624e-13
Cluster_507	9.8713	1.64147e-05
Cluster_508	-8.00145	0.000364056
Cluster_513	5.52859	0.000619167
Cluster_514	16.4128	3.74518e-22
Cluster_518	17.3609	1.06289e-29
Cluster_520	5.23466	0.011017
Cluster_523	8.05326	2.50564e-05
Cluster_532	12.1775	1.19133e-05
Cluster_538	7.09339	1.43061e-10
Cluster_540	-10.1989	0.000602909
Cluster_541	-5.99639	0.0067244
Cluster_546	6.01852	0.000127612
Cluster_548	8.63634	1.89395e-14
Cluster_550	-25.1247	5.50853e-17
Cluster_552	-8.53164	0.0104475
Cluster_553	6.47296	2.44315e-09
Cluster_557	8.67701	0.0374772
Cluster_569	7.92141	1.61657e-15
Cluster_576	10.5958	3.24481e-08
Cluster_577	15.6731	2.79771e-62
Cluster_588	-8.56062	1.907e-09
Cluster_590	7.8528	3.85721e-26
Cluster_593	-5.02602	1.7596e-22
Cluster_598	-12.3337	1.3411e-18
Cluster_599	-12.4474	1.5085e-11
Cluster_601	-10.5183	0.00881585
Cluster_602	-9.56067	3.41523e-06
Cluster_610	-8.32648	2.52414e-06
Cluster_615	5.12418	3.31837e-06
Cluster_624	-5.64819	3.86046e-10
Cluster_633	7.02349	1.93633e-10
Cluster_645	8.08156	3.44297e-08
Cluster_654	5.16884	2.63703e-12
Cluster_655	6.61199	1.55851e-07
Cluster_656	5.56359	1.29205e-07
Cluster_660	8.13187	9.07341e-06
Cluster_664	11.0353	1.45389e-31
Cluster_666	7.81094	4.82208e-16
Cluster_667	13.0727	4.25573e-08
Cluster_676	6.96361	4.51132e-14
Cluster_681	13.3101	1.21608e-35
Cluster_682	14.6446	8.69957e-09
Cluster_685	8.90238	2.63128e-11
Cluster_694	5.33543	0.0477797
Cluster_705	5.61754	1.92184e-07
Cluster_710	6.86043	4.78403e-09
Cluster_711	-6.64374	0.00059103
Cluster_712	-25.651	6.52435e-11
Cluster_721	5.47779	8.57656e-05
Cluster_724	-9.62076	7.98442e-20
Cluster_728	-7.70083	0.00149088
Cluster_736	8.58304	0.00153387
Cluster_742	-7.77381	3.18075e-14
Cluster_743	-10.0678	2.32418e-05
Cluster_767	6.05476	9.78574e-08
Cluster_769	6.61862	5.62868e-05
Cluster_774	12.8021	1.76852e-24
Cluster_780	18.2185	5.24004e-07
Cluster_786	-10.2314	1.2472e-05
Cluster_787	17.1582	2.79494e-42
Cluster_791	7.6426	1.2872e-05
Cluster_792	7.43112	5.84182e-06
Cluster_798	6.52642	1.71437e-11
Cluster_799	5.17019	0.00094138
Cluster_802	5.47326	3.03968e-06
Cluster_807	14.7463	1.34054e-09
Cluster_815	5.17108	2.95969e-12
Cluster_819	9.4754	1.4359e-06
Cluster_821	7.53049	4.12494e-07
Cluster_823	9.90493	2.68418e-08
Cluster_829	6.69282	2.18953e-16
Cluster_833	5.54693	4.30172e-07
Cluster_835	5.82945	1.40569e-06
Cluster_846	5.28051	0.0174356
Cluster_850	5.50651	0.0424522
Cluster_853	16.1007	1.49077e-23
Cluster_855	5.88422	1.488e-06
Cluster_866	11.6165	1.34353e-05
Cluster_867	5.52382	1.03192e-10
Cluster_869	7.54779	2.03739e-06
Cluster_873	5.62718	4.30265e-13
Cluster_874	6.57676	0.000225623
Cluster_881	7.21872	1.82817e-08
Cluster_886	-5.85689	5.12402e-05
Cluster_888	5.89572	0.000101056
Cluster_895	7.56029	2.35684e-07
Cluster_896	5.85086	7.28986e-06
Cluster_907	7.79834	0.000788057
Cluster_908	11.2867	5.01698e-06
Cluster_910	6.07886	7.07571e-08
Cluster_912	6.79273	2.37611e-12
Cluster_918	5.03773	5.43453e-06
Cluster_921	7.57632	1.22031e-27
Cluster_925	9.53032	0.00113019
Cluster_931	9.91429	0.000437802
Cluster_934	5.39436	2.43535e-07
Cluster_938	5.95482	3.61417e-18
Cluster_943	-6.36141	2.32044e-06
Cluster_948	-6.70636	0.0233309
Cluster_951	10.4148	2.13841e-16
Cluster_955	13.3528	5.46093e-40
Cluster_956	-7.6979	4.89488e-07
Cluster_960	7.33187	1.62006e-09
Cluster_961	23.9236	7.34757e-21
Cluster_969	10.2923	2.78248e-23
Cluster_979	7.03527	0.000137353
Cluster_980	7.41335	3.8502e-12
Cluster_983	6.53834	0.000330385
Cluster_984	5.95083	2.80677e-05
Cluster_986	-5.84843	6.82021e-05
Cluster_987	5.34836	1.64823e-09
Cluster_996	7.49699	1.64789e-06
Cluster_998	9.26521	8.81263e-12
Cluster_1002	6.12261	1.08905e-11
Cluster_1003	-14.6417	0.00567513
Cluster_1004	-7.7759	4.05719e-10
Cluster_1007	5.87635	9.66923e-09
Cluster_1010	6.82173	1.65838e-11
Cluster_1012	6.44594	0.000707873
Cluster_1015	7.7419	6.70423e-06
Cluster_1025	-6.67726	0.000103928
Cluster_1026	-12.3225	4.82672e-10
Cluster_1027	-7.11612	8.72958e-10
Cluster_1029	-5.06693	0.0334469
Cluster_1030	5.07112	6.26816e-09
Cluster_1042	9.02051	0.000204636
Cluster_1045	-7.6686	1.72156e-11
Cluster_1046	10.2351	1.03868e-18
Cluster_1049	8.21249	4.72604e-09
Cluster_1055	-19.989	1.27762e-17
Cluster_1064	6.70528	2.54814e-05
Cluster_1065	6.22027	6.93129e-06
Cluster_1066	-7.23472	2.37387e-05
Cluster_1071	-5.15824	0.00159787
Cluster_1072	-14.235	5.93901e-09
Cluster_1073	5.79793	0.000130661
Cluster_1075	7.14288	5.98482e-12
Cluster_1079	-6.73621	3.69321e-05
Cluster_1082	6.62426	1.82621e-05
Cluster_1083	5.60183	0.0110621
Cluster_1086	13.4241	1.10635e-17
Cluster_1088	-19.1599	5.34389e-22
Cluster_1090	14.0705	2.847e-27
Cluster_1100	6.68835	5.53052e-05
Cluster_1105	5.26372	1.52227e-07
Cluster_1112	15.9589	1.79367e-05
Cluster_1117	15.8052	2.20746e-06
Cluster_1125	12.3026	0.000131728
Cluster_1128	7.89332	7.42445e-05
Cluster_1129	6.40684	0.000593333
Cluster_1130	-12.6212	1.40579e-05
Cluster_1135	6.03626	1.30147e-06
Cluster_1136	6.60361	0.000323573
Cluster_1140	-9.82337	0.0106846
Cluster_1142	5.83482	0.00299599
Cluster_1143	-5.63471	0.000407439
Cluster_1161	6.06733	2.3244e-07
Cluster_1169	6.93713	7.72999e-15
Cluster_1174	5.35234	5.40564e-41
Cluster_1181	5.97938	4.89826e-27
Cluster_1183	5.40073	3.44332e-22
Cluster_1184	11.4847	2.92629e-33
Cluster_1187	13.4769	6.29263e-25
Cluster_1188	7.69012	9.34533e-35
Cluster_1204	7.41526	0.00633737
Cluster_1205	-10.2331	0.0336477
Cluster_1216	6.52939	0.00164227
Cluster_1228	5.24547	1.37943e-06
Cluster_1232	12.2391	0.00181797
Cluster_1235	5.65262	0.00211896
Cluster_1238	7.23336	2.06012e-09
Cluster_1241	7.09646	3.42296e-16
Cluster_1247	6.78754	1.40161e-10
Cluster_1248	-14.321	6.39871e-06
Cluster_1254	5.79202	0.0303268
Cluster_1256	-6.58338	0.0285841
Cluster_1258	-10.3055	0.00207159
Cluster_1262	15.2317	1.47031e-11
Cluster_1265	6.72243	0.0133849
Cluster_1276	7.53409	5.4539e-06
Cluster_1279	14.8605	3.80238e-26
Cluster_1281	8.10475	7.82204e-06
Cluster_1292	5.90683	0.000596954
Cluster_1304	6.40028	6.1486e-06
Cluster_1310	-17.4009	0.000222749
Cluster_1321	-8.58456	0.0048396
Cluster_1323	-9.05674	7.05653e-11
Cluster_1325	-10.4687	1.77728e-22
Cluster_1326	-5.27782	0.00618415
Cluster_1329	41.4414	1.03158e-05
Cluster_1330	9.81071	1.01693e-31
Cluster_1344	-6.48156	0.0302444
Cluster_1350	54.6948	0.000630881
Cluster_1359	7.87834	1.3411e-14
Cluster_1367	5.69126	2.37994e-13
Cluster_1368	15.9495	1.87375e-10
Cluster_1372	-5.39353	3.86123e-07
Cluster_1377	5.04525	2.29555e-07
Cluster_1389	6.04151	7.46093e-07
Cluster_1391	10.8165	4.89492e-07
Cluster_1392	9.44459	1.59502e-10
Cluster_1394	-7.32937	2.57572e-06
Cluster_1398	-7.98503	6.53737e-08
Cluster_1404	13.4864	1.03971e-09
Cluster_1405	10.1868	1.02874e-12
Cluster_1413	-27.8576	7.79535e-06
Cluster_1416	6.19119	1.2129e-08
Cluster_1423	-6.86876	7.9932e-08
Cluster_1424	-13.8641	0.00252867
Cluster_1427	-22.8743	1.56931e-11
Cluster_1433	5.45141	0.0323554
Cluster_1438	5.46517	0.0219544
Cluster_1445	-12.6729	0.0346011
Cluster_1446	5.43335	1.07157e-06
Cluster_1453	-17.8992	0
Cluster_1454	5.85033	7.3635e-08
Cluster_1456	-13.5516	0.00242916
Cluster_1457	-11.3633	0
Cluster_1458	-24.6823	0
Cluster_1461	13.7189	0.00363871
Cluster_1464	7.79979	3.4e-18
Cluster_1468	8.15951	4.84523e-11
Cluster_1470	-7.20652	0.0464659
Cluster_1471	5.07287	0.0167727
Cluster_1473	7.47964	3.94491e-07
Cluster_1483	5.10759	3.59878e-06
Cluster_1494	19.3001	1.27839e-06
Cluster_1495	7.98049	0.00037726
Cluster_1499	6.33421	7.25963e-06
Cluster_1505	-5.18654	0.00786524
Cluster_1507	7.58315	0.00538224
Cluster_1508	11.6382	0.0243503
Cluster_1510	5.62807	1.02264e-05
Cluster_1513	-27.7283	2.08463e-39
Cluster_1521	6.44639	1.48306e-11
Cluster_1533	15.483	2.48736e-11
Cluster_1534	5.03455	1.34031e-11
Cluster_1538	5.65255	2.09567e-10
Cluster_1541	-10.915	6.54566e-05
Cluster_1544	-9.58155	0.0490317
Cluster_1546	-11.5417	7.44014e-08
Cluster_1559	8.91225	9.37121e-08
Cluster_1565	5.78594	9.27471e-05
Cluster_1566	9.93714	5.37087e-28
Cluster_1576	7.76287	1.21527e-10
Cluster_1589	8.93916	2.02757e-20
Cluster_1590	5.84418	2.96359e-08
Cluster_1594	5.7745	1.66432e-10
Cluster_1601	6.6415	3.54546e-08
Cluster_1613	-8.5855	4.06476e-11
Cluster_1619	-5.17787	0.0108433
Cluster_1623	7.17405	3.33259e-18
Cluster_1630	8.93136	9.90834e-07
Cluster_1632	7.13048	0.00118134
Cluster_1633	7.97727	5.1588e-08
Cluster_1637	6.17455	0.00421546
Cluster_1638	5.461	3.17381e-07
Cluster_1639	6.45741	6.39658e-14
Cluster_1645	7.84636	1.12326e-16
Cluster_1646	9.5677	4.02739e-18
Cluster_1648	-6.48175	0.00103267
Cluster_1649	7.57035	2.49685e-09
Cluster_1650	6.41855	8.8674e-07
Cluster_1652	5.39892	6.92929e-08
Cluster_1660	5.33751	1.37922e-08
Cluster_1662	-9.13983	0.00571014
Cluster_1671	6.52665	0.00141247
Cluster_1672	7.62274	0.00263749
Cluster_1676	6.80357	5.77435e-16
Cluster_1693	31.1168	0.00961979
Cluster_1701	5.12191	1.3665e-07
Cluster_1710	8.81306	0.00846084
Cluster_1722	-19.0184	0.0286795
Cluster_1723	9.01113	2.97219e-12
Cluster_1726	-8.58669	5.35936e-10
Cluster_1731	5.10191	1.02293e-05
Cluster_1732	7.56644	0.0133828
Cluster_1738	-6.50588	0.0156286
Cluster_1747	-6.41975	0.000391661
Cluster_1749	-11.5465	2.58544e-06
Cluster_1758	19.3499	4.87609e-20
Cluster_1782	9.4661	4.42065e-21
Cluster_1793	-5.13626	0.000858961
Cluster_1800	-6.0532	4.56458e-11
Cluster_1802	10.028	0.000611162
Cluster_1811	-8.25676	0.000497115
Cluster_1817	6.37179	1.32348e-07
Cluster_1828	-6.26136	0.0201554
Cluster_1829	6.39885	2.02605e-10
Cluster_1830	5.90352	2.30859e-06
Cluster_1831	6.01418	2.19095e-05
Cluster_1832	5.94424	1.35132e-05
Cluster_1834	-6.69044	0.000712948
Cluster_1838	-6.54995	0.00650597
Cluster_1839	5.18632	3.217e-10
Cluster_1841	5.30335	4.9347e-06
Cluster_1844	5.25029	1.28154e-08
Cluster_1850	6.80404	5.2821e-07
Cluster_1857	-9.39192	1.47979e-17
Cluster_1880	-6.90267	0.00149424
Cluster_1883	-7.70018	0.00135629
Cluster_1890	7.07749	1.27251e-16
Cluster_1894	45.0617	1.21787e-13
Cluster_1900	14.8375	1.56368e-08
Cluster_1904	5.52359	0.000104584
Cluster_1916	5.67211	6.32163e-15
Cluster_1923	-5.25071	0.00237915
Cluster_1930	-5.2428	9.83033e-06
Cluster_1931	9.04862	1.63265e-06
Cluster_1935	9.03303	1.34753e-17
Cluster_1946	10.3108	4.40644e-12
Cluster_1949	6.30006	0.000187125
Cluster_1962	6.292	0.000111888
Cluster_1963	-6.29658	3.57397e-07
Cluster_1975	7.11135	5.025e-10
Cluster_1981	8.82692	1.15744e-24
Cluster_1983	8.08944	2.69041e-15
Cluster_1986	6.70075	1.98508e-16
Cluster_1990	8.2981	5.9962e-16
Cluster_1992	-5.53766	8.27481e-07
Cluster_1998	8.30014	1.0629e-07
Cluster_1999	-7.56518	3.09104e-10
Cluster_2027	15.7945	2.50873e-12
Cluster_2033	7.48268	0.0016885
Cluster_2037	-5.91121	0.000101603
Cluster_2039	5.04279	2.41295e-08
Cluster_2043	-8.32537	2.44121e-07
Cluster_2046	-9.73894	1.85025e-07
Cluster_2049	5.025	9.29902e-51
Cluster_2051	-9.84984	0.000150923
Cluster_2052	11.548	2.0885e-30
Cluster_2053	8.03827	9.95652e-09
Cluster_2054	-9.00293	6.70335e-05
Cluster_2062	-18.5454	2.54506e-60
Cluster_2066	6.91779	3.20994e-07
Cluster_2067	6.01534	2.1237e-05
Cluster_2075	10.2601	0.0020616
Cluster_2076	-7.77243	7.69742e-05
Cluster_2091	5.88423	8.72817e-09
Cluster_2093	-9.24007	0.000289301
Cluster_2098	-12.5566	2.3413e-10
Cluster_2100	5.0788	0.000657865
Cluster_2114	15.591	3.06697e-17
Cluster_2117	5.16908	2.51904e-06
Cluster_2128	7.33548	2.54478e-20
Cluster_2142	6.8862	3.26166e-17
Cluster_2152	6.23017	0.000643969
Cluster_2159	10.0322	1.02963e-21
Cluster_2167	8.87961	5.27002e-16
Cluster_2173	8.25011	1.14701e-08
Cluster_2178	11.2607	1.32117e-16
Cluster_2184	6.58781	5.47169e-05
Cluster_2190	-7.22022	0.0106376
Cluster_2203	-7.62555	1.71577e-10
Cluster_2204	11.8673	0.000105277
Cluster_2211	5.85686	0.00163275
Cluster_2215	7.01752	1.91767e-14
Cluster_2222	7.60181	3.79597e-15
Cluster_2231	46.8124	5.08165e-11
Cluster_2232	6.33245	0.0436084
Cluster_2251	7.72841	8.6175e-19
Cluster_2262	-9.85451	0.000725077
Cluster_2263	19.3277	9.64336e-13
Cluster_2265	-5.54955	0.00128016
Cluster_2278	-5.26315	0.00296183
Cluster_2286	5.18121	3.56112e-16
Cluster_2291	5.37709	1.78282e-05
Cluster_2292	-6.50157	0.0289501
Cluster_2301	20.1515	0.000315467
Cluster_2306	-11.3614	2.32601e-11
Cluster_2308	9.98153	5.59222e-09
Cluster_2312	-7.76245	2.36992e-07
Cluster_2320	6.73412	2.60834e-05
Cluster_2324	6.14308	8.98199e-15
Cluster_2330	11.9669	3.95282e-12
Cluster_2337	9.53761	0.00244755
Cluster_2340	6.01668	8.27554e-08
Cluster_2346	6.29888	7.45085e-19
Cluster_2348	6.49814	2.2563e-08
Cluster_2353	6.6388	8.61833e-17
Cluster_2366	6.55166	1.14926e-14
Cluster_2373	7.52937	6.54503e-14
Cluster_2374	-6.79248	0.00189931
Cluster_2376	5.90378	1.00668e-11
Cluster_2377	7.28965	7.38158e-07
Cluster_2383	8.94069	3.56707e-20
Cluster_2386	5.24937	0.00150861
Cluster_2388	-15.2907	5.36781e-28
Cluster_2399	5.07201	3.09366e-10
Cluster_2409	5.12585	9.43152e-08
Cluster_2416	-17.4949	2.43559e-06
Cluster_2421	5.46879	0.000698829
Cluster_2426	7.38324	0.000160351
Cluster_2431	5.52512	0.00220012
Cluster_2437	5.76625	7.43237e-10
Cluster_2444	-8.14445	3.81669e-06
Cluster_2445	-6.36648	4.65202e-10
Cluster_2447	-12.9011	4.22235e-09
Cluster_2451	-36.8025	4.11585e-16
Cluster_2452	-6.09031	0.00382776
Cluster_2468	9.85529	0.00126621
Cluster_2479	6.65114	1.30568e-06
Cluster_2483	8.37785	1.22925e-07
Cluster_2484	7.22824	6.29981e-10
Cluster_2494	8.83932	1.97286e-08
Cluster_2495	5.96248	3.88697e-18
Cluster_2499	9.03053	0.037333
Cluster_2503	5.03766	2.67142e-08
Cluster_2509	-6.29135	6.1985e-07
Cluster_2511	12.9456	4.92251e-07
Cluster_2517	-7.08257	8.56644e-15
Cluster_2528	-6.13368	0.000123302
Cluster_2533	5.69668	1.68263e-13
Cluster_2534	6.03239	0.0020572
Cluster_2535	-6.99791	2.81981e-05
Cluster_2540	7.60649	3.02299e-12
Cluster_2543	5.70175	0.0254448
Cluster_2545	-6.7105	0.00670559
Cluster_2549	11.8559	1.42748e-101
Cluster_2558	-13.5494	3.55889e-10
Cluster_2570	6.12166	4.74221e-09
Cluster_2572	-6.59318	0.000556935
Cluster_2580	8.38524	0.000246826
Cluster_2584	-10.0245	2.92086e-06
Cluster_2588	-9.55719	1.46476e-06
Cluster_2590	5.94567	4.18888e-05
Cluster_2598	-7.90386	1.24224e-28
Cluster_2600	14.3587	1.10067e-07
Cluster_2610	5.86492	2.30867e-06
Cluster_2616	6.85236	0.028521
Cluster_2620	-6.7612	2.47274e-12
Cluster_2632	-7.99564	1.41759e-05
Cluster_2636	6.9978	2.1558e-33
Cluster_2639	-5.96605	0.00942963
Cluster_2655	5.26552	7.08937e-07
Cluster_2661	6.63626	0.000305784
Cluster_2666	8.65623	3.16679e-11
Cluster_2671	6.39437	3.89362e-09
Cluster_2679	5.98657	1.65994e-14
Cluster_2682	-5.55118	0.00190952
Cluster_2700	23.992	0.000449343
Cluster_2702	7.40299	7.66966e-09
Cluster_2711	-5.88283	0.00383664
Cluster_2714	-7.81001	2.45436e-06
Cluster_2715	6.01508	2.0434e-11
Cluster_2716	6.28134	3.11962e-14
Cluster_2720	-9.89714	0.000228619
Cluster_2724	9.4392	0.0454343
Cluster_2726	6.08248	1.9638e-06
Cluster_2732	5.09786	3.69246e-06
Cluster_2733	14.3964	0.00128912
Cluster_2734	8.50104	0.00642986
Cluster_2744	9.88454	9.68394e-11
Cluster_2745	6.37596	0.0494887
Cluster_2750	6.32362	1.86414e-13
Cluster_2757	5.684	0.0012961
Cluster_2765	7.25975	1.90799e-05
Cluster_2767	8.38926	1.72564e-31
Cluster_2777	6.3245	5.225e-05
Cluster_2778	7.66709	0.0343724
Cluster_2779	36.1107	1.55376e-28
Cluster_2781	17.9064	4.25551e-14
Cluster_2783	31.0867	1.61891e-42
Cluster_2784	8.36059	9.60823e-22
Cluster_2802	-18.8879	7.15052e-17
Cluster_2803	10.2747	2.02051e-11
Cluster_2804	6.27555	0.000149485
Cluster_2805	-88.6105	1.33499e-93
Cluster_2808	7.48846	3.7563e-06
Cluster_2811	5.85174	2.6358e-11
Cluster_2816	7.32738	5.50062e-10
Cluster_2821	-7.03319	0.000336402
Cluster_2822	6.33003	5.67459e-05
Cluster_2823	-9.21322	7.42887e-11
Cluster_2824	21.8601	1.06479e-21
Cluster_2842	13.1714	1.63986e-07
Cluster_2858	40.8747	1.64881e-36
Cluster_2863	5.30214	8.28934e-11
Cluster_2865	7.00683	3.73759e-12
Cluster_2868	23.8242	6.91432e-28
Cluster_2871	-8.86632	0.00213156
Cluster_2875	-5.08346	3.88561e-06
Cluster_2883	5.81692	4.29579e-08
Cluster_2886	8.49233	3.43294e-05
Cluster_2888	12.9805	2.77991e-15
Cluster_2891	-5.58192	0.0165576
Cluster_2903	6.63814	0.000567801
Cluster_2906	-9.83197	5.71718e-08
Cluster_2907	-8.44759	0.000120623
Cluster_2910	7.67039	0.00318872
Cluster_2916	6.55856	3.45149e-18
Cluster_2937	-49.9793	1.38549e-27
Cluster_2951	-9.85894	1.72667e-14
Cluster_2952	5.01014	0.00287532
Cluster_2958	6.35239	4.09541e-67
Cluster_2971	-11.5279	7.99198e-06
Cluster_2972	7.83431	0.00500849
Cluster_2979	6.39002	1.73441e-12
Cluster_2981	-5.22113	0.046818
Cluster_2982	5.87023	8.70016e-05
Cluster_2995	-38.0951	4.0397e-31
Cluster_3000	-8.29643	2.97364e-07
Cluster_3003	6.39673	5.58677e-09
Cluster_3008	-7.28923	4.28001e-13
Cluster_3014	7.10368	2.457e-11
Cluster_3027	-6.5811	2.30859e-06
Cluster_3034	7.28498	0.000803004
Cluster_3037	-5.66308	0.000423986
Cluster_3038	5.29638	4.71332e-10
Cluster_3058	-8.33333	6.23186e-06
Cluster_3064	11.2729	0.000116241
Cluster_3073	8.56437	4.0621e-08
Cluster_3079	5.90379	3.54654e-07
Cluster_3089	6.19492	9.24557e-06
Cluster_3100	16.0782	2.13275e-29
Cluster_3101	5.58283	0.00229604
Cluster_3103	16.5719	1.36099e-41
Cluster_3106	-10.5114	1.2833e-05
Cluster_3109	9.10032	1.96254e-09
Cluster_3115	5.26435	3.1681e-05
Cluster_3116	40.6457	2.27873e-11
Cluster_3117	7.3162	2.88158e-06
Cluster_3119	16.6362	9.75193e-83
Cluster_3124	6.66258	0.0373936
Cluster_3126	7.5385	2.14252e-17
Cluster_3128	-8.48561	1.88976e-10
Cluster_3129	-5.48472	5.69004e-07
Cluster_3153	-5.22635	2.18239e-07
Cluster_3156	-7.16985	0.00366619
Cluster_3158	10.2477	8.61279e-33
Cluster_3164	6.8433	0.00121506
Cluster_3168	-9.92231	3.74239e-08
Cluster_3173	7.875	5.61542e-13
Cluster_3181	32.9926	4.78815e-89
Cluster_3198	-12.003	0.00149424
Cluster_3200	-16.601	0.0261282
Cluster_3201	6.69706	0.00300174
Cluster_3204	-5.41423	6.71872e-06
Cluster_3211	8.45731	5.87748e-21
Cluster_3212	-5.77275	0.00571015
Cluster_3213	-12.9565	1.11648e-07
Cluster_3215	-7.94595	0.000657412
Cluster_3237	5.78052	5.56365e-06
Cluster_3239	11.9864	2.63047e-21
Cluster_3243	7.54679	0.000527069
Cluster_3246	-8.78227	1.24367e-05
Cluster_3258	-6.85475	0.00343966
Cluster_3270	9.35055	1.055e-05
Cluster_3276	-12.6051	4.17609e-10
Cluster_3282	6.71528	2.03612e-09
Cluster_3285	5.08586	1.38344e-08
Cluster_3292	6.09999	0.0163209
Cluster_3299	9.02328	1.42765e-26
Cluster_3303	6.73094	1.03101e-09
Cluster_3306	-5.62625	0.00245719
Cluster_3312	-10.7394	0.000521589
Cluster_3314	5.41876	0.00298458
Cluster_3324	-8.41072	8.73778e-07
Cluster_3327	-13.8707	0.000514743
Cluster_3330	16.7215	6.07788e-69
Cluster_3339	6.06816	1.01379e-16
Cluster_3343	-9.08983	0.00151545
Cluster_3346	7.59481	1.03686e-09
Cluster_3352	-5.85913	5.21775e-09
Cluster_3355	7.57172	7.34538e-05
Cluster_3359	5.04513	0.00115641
Cluster_3362	5.19541	1.6027e-06
Cluster_3374	5.78047	3.60472e-23
Cluster_3376	8.33343	1.39281e-12
Cluster_3381	5.68374	6.4085e-10
Cluster_3388	-6.13052	0.000518546
Cluster_3395	10.0273	0.00011112
Cluster_3397	6.00378	2.02776e-09
Cluster_3411	15.4406	1.5305e-06
Cluster_3414	5.9681	0.0101261
Cluster_3417	51.7838	4.09296e-279
Cluster_3423	6.85697	3.19911e-16
Cluster_3427	18.1238	3.14737e-52
Cluster_3436	12.3303	1.09935e-13
Cluster_3440	13.0473	1.0799e-12
Cluster_3446	8.24816	4.74511e-10
Cluster_3456	10.1779	2.97613e-20
Cluster_3461	-6.0379	6.9287e-05
Cluster_3467	7.89584	1.4724e-07
Cluster_3487	-5.03923	7.38484e-11
Cluster_3488	7.1425	1.15853e-23
Cluster_3495	10.0703	1.23341e-12
Cluster_3499	-21.994	2.10363e-10
Cluster_3501	-16.4184	1.03563e-14
Cluster_3502	6.11195	0.00507465
Cluster_3518	12.1233	1.42765e-26
Cluster_3524	8.98314	0.0126518
Cluster_3536	-22.9278	1.73621e-33
Cluster_3539	17.4988	7.00071e-09
Cluster_3540	6.01941	0.00379554
Cluster_3558	5.69987	2.1877e-05
Cluster_3560	6.70156	0.000300561
Cluster_3561	6.52716	1.52092e-10
Cluster_3563	6.25819	2.14808e-16
Cluster_3565	7.66649	4.41862e-08
Cluster_3571	-5.52373	2.70677e-15
Cluster_3575	9.81107	3.90396e-27
Cluster_3588	-12.5596	4.75314e-18
Cluster_3596	-6.08557	9.49917e-05
Cluster_3604	9.83412	0.00850697
Cluster_3617	-10.3601	5.17145e-16
Cluster_3628	5.94498	4.19758e-07
Cluster_3634	5.84751	2.98883e-25
Cluster_3636	-6.27947	4.48384e-30
Cluster_3647	-6.19767	1.84884e-06
Cluster_3653	5.36625	8.9373e-06
Cluster_3654	-6.52188	2.1965e-06
Cluster_3664	6.20164	8.22604e-11
Cluster_3672	-8.87632	4.69288e-11
Cluster_3685	5.11369	6.21133e-10
Cluster_3691	24.0876	7.42887e-11
Cluster_3696	-51.227	1.43687e-09
Cluster_3698	-13.0218	1.4132e-15
Cluster_3709	7.30742	9.0336e-10
Cluster_3710	8.23438	0.0251174
Cluster_3715	6.24399	3.131e-08
Cluster_3724	11.0398	8.28865e-47
Cluster_3726	5.62776	1.02703e-11
Cluster_3733	8.68704	2.06587e-17
Cluster_3734	-7.92459	1.39272e-16
Cluster_3736	6.22827	5.87072e-11
Cluster_3738	5.61479	2.08114e-07
Cluster_3749	10.016	1.52276e-28
Cluster_3750	5.95989	1.07066e-13
Cluster_3753	-8.08644	0.000158312
Cluster_3764	8.62228	2.58957e-07
Cluster_3768	-5.70246	6.4562e-07
Cluster_3776	11.7372	4.99815e-30
Cluster_3787	6.25011	4.18137e-07
Cluster_3792	-6.83619	9.65854e-05
Cluster_3810	-15.7694	9.49946e-06
Cluster_3820	9.63069	1.71725e-15
Cluster_3828	6.0616	2.48824e-08
Cluster_3835	6.21618	3.48507e-08
Cluster_3837	5.59918	0.00339422
Cluster_3844	6.32667	1.96134e-06
Cluster_3853	6.12409	6.91382e-76
Cluster_3854	6.23548	4.42832e-22
Cluster_3859	5.74934	5.6962e-37
Cluster_3862	7.93058	0.0015856
Cluster_3864	7.31756	0.000518546
Cluster_3865	7.49061	1.7278e-06
Cluster_3876	14.6488	0.0205492
Cluster_3877	-5.55893	2.03581e-11
Cluster_3886	5.89394	7.78403e-06
Cluster_3888	5.58122	1.67354e-06
Cluster_3903	5.10688	0.00450747
Cluster_3907	-10.4799	0.000101639
Cluster_3911	7.5259	4.11154e-20
Cluster_3915	-11.1716	0.0129338
Cluster_3919	9.82581	5.04893e-21
Cluster_3935	7.54839	0.0167657
Cluster_3947	26.8545	0.00727871
Cluster_3948	9.07349	1.99644e-11
Cluster_3952	-12.6774	3.26704e-06
Cluster_3954	6.51826	3.09068e-08
Cluster_3960	6.29039	0.000675988
Cluster_3961	-5.64695	4.27158e-08
Cluster_3968	-6.73599	0.00370373
Cluster_3970	5.62801	7.85759e-14
Cluster_3974	-9.43322	1.40212e-17
Cluster_3976	38.7023	1.09979e-25
Cluster_3977	10.5209	2.26727e-05
Cluster_3979	-6.12513	1.80651e-05
Cluster_3981	-5.7516	0.0220143
Cluster_3986	-17.6496	1.68394e-26
Cluster_3998	5.26403	1.25799e-05
Cluster_4002	-12.8972	8.89416e-26
Cluster_4006	5.1571	1.5259e-07
Cluster_4009	12.2404	2.32187e-12
Cluster_4011	9.24807	3.63243e-15
Cluster_4012	-5.76803	0.000509413
Cluster_4015	-5.44052	2.24531e-158
Cluster_4016	7.11469	4.80464e-12
Cluster_4032	11.1337	0.0182497
Cluster_4033	7.68134	3.06089e-07
Cluster_4040	25.4832	2.03971e-18
Cluster_4042	22.4393	7.83936e-23
Cluster_4046	-11.5958	5.38035e-12
Cluster_4049	13.4025	5.08428e-49
Cluster_4054	13.2106	2.38146e-19
Cluster_4055	17.3514	0.000596387
Cluster_4060	-8.50559	5.59459e-08
Cluster_4076	11.9173	7.55554e-12
Cluster_4080	19.1818	0.00135264
Cluster_4082	7.35467	2.20346e-06
Cluster_4083	12.2006	9.85228e-18
Cluster_4084	11.347	3.64878e-12
Cluster_4086	-8.38176	1.32335e-10
Cluster_4088	9.67022	1.51699e-13
Cluster_4090	5.3271	5.04673e-09
Cluster_4091	-6.54412	0.00740877
Cluster_4095	-7.35472	0.00267159
Cluster_4104	-9.35201	3.42197e-07
Cluster_4107	5.88103	6.77455e-05
Cluster_4112	6.52134	0.000192928
Cluster_4119	6.44886	1.83708e-06
Cluster_4126	-7.85935	1.08772e-07
Cluster_4129	-7.08763	1.26106e-06
Cluster_4131	9.36311	7.08987e-24
Cluster_4138	5.5794	2.80805e-05
Cluster_4140	7.18026	3.1638e-17
Cluster_4143	-8.88437	0.00142095
Cluster_4150	-8.16963	2.36993e-06
Cluster_4164	13.8419	3.52422e-14
Cluster_4169	5.70326	0.000411178
Cluster_4174	6.8251	7.30229e-11
Cluster_4175	10.5102	1.14423e-07
Cluster_4181	8.20222	2.06851e-20
Cluster_4190	10.3124	1.04154e-23
Cluster_4195	6.80899	2.97901e-11
Cluster_4204	-5.2144	1.00925e-05
Cluster_4229	5.64904	0.000698609
Cluster_4233	5.13681	5.1364e-08
Cluster_4235	5.37665	8.18374e-09
Cluster_4242	-7.75063	1.08175e-07
Cluster_4250	8.52172	1.98747e-13
Cluster_4268	8.88535	1.55194e-07
Cluster_4270	5.13021	0.00557506
Cluster_4275	6.52387	1.11253e-09
Cluster_4285	6.33521	1.07553e-17
Cluster_4295	6.44376	3.79698e-13
Cluster_4299	8.13124	2.46468e-12
Cluster_4304	9.67339	1.71667e-09
Cluster_4306	-6.06585	0.000291193
Cluster_4310	5.64669	1.54109e-13
Cluster_4317	16.8762	2.38941e-26
Cluster_4324	48.6656	1.36754e-205
Cluster_4325	-7.14666	3.33772e-08
Cluster_4336	42.029	1.27109e-43
Cluster_4348	5.5132	9.99478e-05
Cluster_4350	-8.86039	9.54421e-06
Cluster_4352	21.7476	2.93313e-12
Cluster_4354	-8.43864	2.07376e-06
Cluster_4357	7.73377	1.63583e-07
Cluster_4362	6.90339	0.00157793
Cluster_4369	-5.2333	0.00313357
Cluster_4370	8.80061	0.0014564
Cluster_4375	-6.16921	0.000100847
Cluster_4387	-11.5788	2.0811e-07
Cluster_4388	-5.17301	0.00167594
Cluster_4394	11.693	2.09009e-28
Cluster_4403	5.0896	7.59639e-07
Cluster_4404	18.0336	0.000271968
Cluster_4406	7.04604	5.35129e-07
Cluster_4408	19.5609	3.55184e-05
Cluster_4412	-5.24712	1.65239e-10
Cluster_4420	7.79212	8.47592e-06
Cluster_4422	6.04556	4.57804e-11
Cluster_4426	5.41017	2.64679e-14
Cluster_4431	20.0754	1.41173e-32
Cluster_4434	6.29137	6.08409e-09
Cluster_4439	7.86212	5.5573e-21
Cluster_4464	-5.83195	1.68205e-07
Cluster_4471	-5.33204	1.3686e-10
Cluster_4482	8.79931	4.50063e-09
Cluster_4483	7.06213	4.43036e-05
Cluster_4484	6.43595	1.24313e-14
Cluster_4493	-5.96113	0.00306652
Cluster_4505	-17.0367	3.96003e-19
Cluster_4507	9.78482	6.67167e-17
Cluster_4510	5.41409	1.30477e-08
Cluster_4512	7.81585	7.85274e-21
Cluster_4518	-7.50047	1.22565e-07
Cluster_4528	8.83802	1.16529e-13
Cluster_4531	16.0443	1.75266e-14
Cluster_4540	6.86605	0.00037726
Cluster_4544	9.26808	0.000506868
Cluster_4560	23.031	9.45923e-23
Cluster_4561	9.78385	5.06801e-17
Cluster_4566	18.7398	7.82581e-08
Cluster_4569	-5.4277	0.0491186
Cluster_4572	14.2695	2.08995e-05
Cluster_4575	-21.1799	1.08532e-12
Cluster_4583	12.6823	9.97607e-11
Cluster_4590	-5.51072	0.0061334
Cluster_4595	9.23439	0.0010797
Cluster_4621	7.05383	3.43122e-08
Cluster_4623	-8.22421	0.0191561
Cluster_4625	9.7851	1.68641e-08
Cluster_4627	-5.71489	2.82678e-05
Cluster_4628	42.9904	1.03837e-223
Cluster_4631	9.12089	5.03823e-10
Cluster_4634	-5.39528	2.56793e-06
Cluster_4635	6.52095	0.00874804
Cluster_4638	12.0915	1.25038e-08
Cluster_4641	14.116	7.9015e-11
Cluster_4649	-15.4545	9.49606e-05
Cluster_4662	-6.79799	6.42574e-06
Cluster_4665	-9.37076	1.57144e-09
Cluster_4670	5.26259	4.37451e-14
Cluster_4680	6.47652	1.26395e-15
Cluster_4681	19.8379	1.62755e-26
Cluster_4687	10.4967	4.1437e-24
Cluster_4688	-9.16699	1.39251e-06
Cluster_4689	8.29611	3.10132e-09
Cluster_4701	26.7268	4.73269e-05
Cluster_4703	7.01787	2.38343e-26
Cluster_4706	6.93138	3.95048e-05
Cluster_4707	9.2097	3.52331e-07
Cluster_4711	11.8785	3.83834e-13
Cluster_4712	7.70452	0.0004397
Cluster_4721	-13.6116	3.34228e-05
Cluster_4727	6.53244	6.71954e-10
Cluster_4732	10.1811	3.56388e-05
Cluster_4733	-25.1693	1.21096e-05
Cluster_4734	12.0823	3.88318e-05
Cluster_4737	-10.1679	3.88089e-09
Cluster_4742	8.50728	2.63673e-08
Cluster_4743	6.36044	3.58746e-13
Cluster_4746	9.85895	1.30805e-09
Cluster_4747	7.74004	8.39799e-05
Cluster_4749	6.44172	4.29841e-13
Cluster_4750	5.55082	2.47998e-06
Cluster_4754	-5.39861	0.000304749
Cluster_4768	-6.38731	3.24778e-05
Cluster_4778	-9.83624	5.68995e-06
Cluster_4782	6.72557	9.23744e-08
Cluster_4784	6.97758	2.07779e-07
Cluster_4797	8.82876	3.27014e-10
Cluster_4810	6.11436	2.1755e-13
Cluster_4822	-13.3037	8.87813e-07
Cluster_4824	-10.8439	0.000774988
Cluster_4825	5.78115	4.02281e-07
Cluster_4828	6.70749	2.33396e-05
Cluster_4832	5.25889	3.69475e-09
Cluster_4836	-10.2367	1.18432e-47
Cluster_4842	-11.5508	0.00590871
Cluster_4844	21.6667	0.0439733
Cluster_4851	6.06029	1.82227e-09
Cluster_4882	6.99229	5.54505e-10
Cluster_4892	-10	0.0103085
Cluster_4896	-14.0959	0.000300561
Cluster_4901	8.09341	3.55945e-13
Cluster_4914	9.72044	1.23788e-18
Cluster_4915	6.28277	8.87579e-07
Cluster_4923	6.59472	1.11406e-13
Cluster_4927	6.05542	1.66648e-14
Cluster_4940	5.00304	3.25503e-07
Cluster_4943	5.40057	2.61394e-07
Cluster_4945	15.5025	1.62699e-46
Cluster_4948	6.15463	2.36034e-12
Cluster_4958	-6.66755	0.00087059
Cluster_4965	5.35425	0.000354465
Cluster_4967	9.00908	1.9666e-16
Cluster_4969	5.36488	1.6231e-09
Cluster_4970	-6.41804	3.45012e-09
Cluster_4973	-8.89469	1.16777e-09
Cluster_4982	7.98001	3.0286e-06
Cluster_4983	6.05341	0.000183308
Cluster_4986	6.37373	2.68749e-09
Cluster_4987	5.82639	2.2769e-07
Cluster_4990	-26.1748	4.46915e-10
Cluster_4999	6.85459	2.84201e-13
Cluster_5000	-7.32367	8.01999e-07
Cluster_5001	-11.8234	9.59446e-08
Cluster_5007	6.18785	3.38535e-20
Cluster_5013	-6.4101	0.00165768
Cluster_5016	8.53879	1.94025e-10
Cluster_5019	5.16817	2.99745e-13
Cluster_5021	-12.6899	2.16537e-27
Cluster_5024	9.52679	1.13775e-15
Cluster_5025	5.99863	3.03645e-08
Cluster_5028	-8.83245	3.34656e-76
Cluster_5030	-22.2962	1.20623e-22
Cluster_5031	-7.62949	1.51539e-06
Cluster_5035	-8.5768	3.85733e-34
Cluster_5041	-10.0634	0.0185448
Cluster_5051	-21.9413	2.45704e-21
Cluster_5054	-10.3881	9.67859e-08
Cluster_5059	5.32312	2.98074e-38
Cluster_5065	-13.708	3.87288e-07
Cluster_5067	5.96492	1.5959e-15
Cluster_5069	8.45164	2.62182e-07
Cluster_5071	5.65262	0.0340353
Cluster_5077	-9.99582	1.46324e-10
Cluster_5082	6.23998	1.87234e-09
Cluster_5088	-6.54854	0.00801247
Cluster_5093	-9.54497	2.93802e-11
Cluster_5094	-24.5586	1.15927e-24
Cluster_5098	8.20748	5.82059e-20
Cluster_5103	5.8456	1.35492e-07
Cluster_5104	6.23034	0.000131673
Cluster_5107	-6.04836	9.87542e-08
Cluster_5112	5.77252	0.00482412
Cluster_5117	6.10292	2.02605e-10
Cluster_5126	-10.8903	6.59474e-21
Cluster_5133	5.63363	7.76195e-05
Cluster_5136	8.77269	7.65192e-88
Cluster_5141	7.73819	1.23211e-13
Cluster_5142	9.80695	3.89755e-14
Cluster_5147	10.3772	4.39459e-23
Cluster_5151	-5.09482	0.00042115
Cluster_5168	5.44583	5.21594e-07
Cluster_5181	9.89469	1.42959e-08
Cluster_5190	-10.7029	3.89245e-05
Cluster_5196	-5.27059	0.0134446
Cluster_5199	7.50072	1.36956e-07
Cluster_5203	8.10807	3.10333e-14
Cluster_5204	13.3333	6.90737e-12
Cluster_5207	5.03609	1.04218e-11
Cluster_5219	6.73397	3.63148e-13
Cluster_5226	14.4558	1.36993e-15
Cluster_5227	6.59786	7.97526e-12
Cluster_5247	8.46092	9.52771e-21
Cluster_5251	-9.37619	4.04027e-06
Cluster_5258	-24.1897	8.38555e-26
Cluster_5262	7.05749	1.54575e-23
Cluster_5267	8.70655	3.89798e-19
Cluster_5270	7.88583	1.9457e-09
Cluster_5272	6.29477	6.06129e-05
Cluster_5288	15.171	4.82087e-08
Cluster_5293	-5.56819	0.000170521
Cluster_5294	-6.66055	2.21956e-05
Cluster_5305	6.32683	1.40518e-06
Cluster_5306	9.51038	0.000952589
Cluster_5310	6.2412	1.54508e-16
Cluster_5313	30.0269	1.5561e-25
Cluster_5321	-5.54931	0.00678162
Cluster_5322	8.34366	9.01834e-33
Cluster_5351	6.48409	3.56561e-05
Cluster_5352	5.70402	1.44023e-13
Cluster_5353	-59.1141	1.01693e-31
Cluster_5357	5.6551	4.64196e-12
Cluster_5380	5.60015	0.000103112
Cluster_5388	7.11559	5.69661e-05
Cluster_5391	9.26757	5.54714e-15
Cluster_5407	-41.5756	2.44394e-35
Cluster_5408	7.98479	8.25365e-07
Cluster_5413	7.64147	5.26135e-06
Cluster_5416	5.66714	1.36364e-05
Cluster_5420	-12.3077	1.30013e-05
Cluster_5422	10.5808	0.0367095
Cluster_5427	11.1741	9.59295e-21
Cluster_5429	5.62539	2.29138e-10
Cluster_5442	-10.0521	0.000379984
Cluster_5446	6.33104	0.0176508
Cluster_5461	7.40913	0.000142407
Cluster_5470	5.91189	4.33106e-10
Cluster_5475	6.0361	2.91108e-06
Cluster_5493	8.19094	2.49505e-16
Cluster_5498	10.9492	2.62058e-07
Cluster_5501	-5.01401	0.000874674
Cluster_5512	5.52168	0.000411967
Cluster_5518	22.2083	0.00222862
Cluster_5521	-8.107	1.04612e-08
Cluster_5522	-11.4824	6.30503e-12
Cluster_5547	-6.30434	4.73495e-08
Cluster_5558	7.3836	2.5249e-26
Cluster_5559	6.07914	1.04021e-22
Cluster_5562	16.375	1.44134e-09
Cluster_5569	-32.5	0.0401014
Cluster_5579	5.28289	3.92978e-37
Cluster_5586	16.3525	5.2309e-21
Cluster_5587	5.42964	8.39541e-11
Cluster_5593	20.5823	0
Cluster_5595	-6.27075	6.59327e-08
Cluster_5598	32.8588	2.97589e-163
Cluster_5600	13.6901	6.77535e-37
Cluster_5602	-6.25689	2.48371e-06
Cluster_5606	10.3267	1.29698e-28
Cluster_5609	19.6591	3.74239e-22
Cluster_5610	-16.1874	1.11475e-09
Cluster_5611	21.4876	4.40066e-12
Cluster_5614	18.8241	3.75974e-16
Cluster_5615	-6.91039	1.07192e-21
Cluster_5616	57.774	5.33093e-15
Cluster_5621	11.164	3.55582e-06
Cluster_5622	7.37858	1.01857e-08
Cluster_5628	8.53588	3.03517e-15
Cluster_5630	5.0827	5.2916e-12
Cluster_5633	5.29084	0.000740827
Cluster_5636	36.982	0.00132732
Cluster_5637	9.79072	2.89537e-07
Cluster_5639	-5.16191	0.000125329
Cluster_5642	17.7857	0.000907019
Cluster_5643	11.0987	0.00246056
Cluster_5645	-6.68125	4.77303e-09
Cluster_5647	23.4348	4.8735e-204
Cluster_5648	6.32314	1.35076e-10
Cluster_5654	7.83333	2.36363e-09
Cluster_5658	17.1015	9.99351e-36
Cluster_5680	5.58916	1.61845e-06
Cluster_5686	7.15835	9.70251e-17
Cluster_5701	-5.23166	0.00539856
Cluster_5721	6.80173	9.52243e-05
Cluster_5723	8.15073	2.95869e-22
Cluster_5725	9.36526	0.000605027
Cluster_5729	5.34802	2.94087e-09
Cluster_5739	-5.35796	4.29101e-08
Cluster_5744	5.42375	1.3066e-05
Cluster_5747	5.42549	1.60776e-06
Cluster_5749	13.6118	3.30574e-27
Cluster_5761	-8.12771	1.27865e-06
Cluster_5762	9.93809	1.54616e-19
Cluster_5763	5.29333	0.00340608
Cluster_5764	-10.521	1.30343e-13
Cluster_5765	-12.0587	8.038e-14
Cluster_5766	10.982	0.000194269
Cluster_5771	7.67722	7.7789e-07
Cluster_5773	9.61832	0.0139366
Cluster_5774	7.0898	3.02299e-12
Cluster_5779	-7.79311	9.1029e-07
Cluster_5789	-7.81479	3.06766e-06
Cluster_5790	-7.40607	1.81639e-24
Cluster_5792	6.78994	3.86837e-10
Cluster_5793	10.2635	0.000206902
Cluster_5799	-6.41151	1.2007e-07
Cluster_5803	-17.1879	1.3444e-09
Cluster_5816	-7.34888	7.03626e-06
Cluster_5827	7.27428	1.70265e-19
Cluster_5836	8.1825	2.54729e-08
Cluster_5841	5.14543	1.51226e-12
Cluster_5849	25.2502	9.95739e-141
Cluster_5862	-10.3988	3.59848e-06
Cluster_5877	8.43363	1.56366e-06
Cluster_5878	17.9999	6.75059e-54
Cluster_5883	6.25199	0.00326898
Cluster_5885	5.87135	1.17105e-06
Cluster_5888	6.66092	6.74177e-08
Cluster_5899	5.10728	0.00151056
Cluster_5920	-17.6028	6.73217e-24
Cluster_5923	-5.1946	0.0135029
Cluster_5924	6.99645	2.65013e-10
Cluster_5926	-5.55237	1.01252e-06
Cluster_5927	21.9563	1.44492e-06
Cluster_5928	-5.28926	0.00624514
Cluster_5931	5.60202	0.0287222
Cluster_5933	-5.28325	0.000955138
Cluster_5934	9.42602	8.25097e-05
Cluster_5958	10.4357	1.50524e-07
Cluster_5961	6.69776	4.97921e-32
Cluster_5980	8.72447	0.00190449
Cluster_5983	8.01073	0.00233109
Cluster_5988	6.55288	1.58615e-13
Cluster_5999	7.38608	1.4316e-10
Cluster_6001	7.93884	4.59112e-09
Cluster_6012	-6.60829	0.00276973
Cluster_6013	5.02638	1.6057e-05
Cluster_6017	-6.65676	1.66787e-06
Cluster_6034	-13.1937	3.25596e-05
Cluster_6040	5.23281	0.00127486
Cluster_6043	-13.9284	2.54224e-10
Cluster_6054	-14.4788	7.36147e-09
Cluster_6060	-5.41916	0.0350464
Cluster_6070	5.09118	2.05893e-06
Cluster_6076	12.4988	8.51162e-52
Cluster_6077	5.08563	2.23092e-05
Cluster_6083	5.44943	0.000144697
Cluster_6086	-5.01992	0.00538195
Cluster_6098	9.15601	6.03039e-33
Cluster_6101	11.6601	0.00201294
Cluster_6107	23.4919	3.404e-66
Cluster_6112	-6.51496	1.79001e-06
Cluster_6114	-16.7885	4.6577e-19
Cluster_6116	7.30489	0.000905204
Cluster_6126	5.04391	1.04487e-11
Cluster_6143	19.3963	0.00029601
Cluster_6146	14.605	1.51725e-16
Cluster_6149	-5.10117	0.000215979
Cluster_6152	6.0675	0.000145722
Cluster_6154	8.50813	3.39341e-11
Cluster_6162	19.3064	2.56208e-16
Cluster_6164	8.4996	2.4089e-11
Cluster_6166	-5.23961	0.0181177
Cluster_6167	-8.93914	2.9171e-09
Cluster_6170	-15.3527	1.82165e-08
Cluster_6174	7.52752	5.20744e-19
Cluster_6179	6.08264	1.29111e-11
Cluster_6181	6.26594	0.00105245
Cluster_6192	6.92682	0.000193601
Cluster_6195	7.60166	2.14409e-10
Cluster_6203	-8.20097	0.00223027
Cluster_6218	10.332	5.35987e-07
Cluster_6222	5.84944	8.54287e-15
Cluster_6226	6.38042	9.54005e-05
Cluster_6228	-8.04083	0.00012885
Cluster_6229	-8.07727	1.44601e-07
Cluster_6235	-7.27204	0.000212569
Cluster_6240	-7.47493	7.14244e-12
Cluster_6242	-9.02913	2.91741e-06
Cluster_6244	5.16143	6.19431e-240
Cluster_6255	5.65332	6.70608e-05
Cluster_6263	6.33201	3.95063e-18
Cluster_6268	6.86369	3.10945e-07
Cluster_6276	7.99862	1.91621e-15
Cluster_6284	8.36377	4.54706e-07
Cluster_6286	-6.67054	3.15645e-09
Cluster_6287	6.79768	1.24129e-13
Cluster_6289	5.76094	6.02579e-06
Cluster_6294	14.4067	8.7322e-15
Cluster_6295	-9.5027	1.65689e-15
Cluster_6304	-5.46749	0.00067841
Cluster_6305	-24.0093	1.59988e-07
Cluster_6306	-6.89631	0.000870091
Cluster_6309	-6.57641	7.6857e-07
Cluster_6320	9.57797	0.00210239
Cluster_6322	6.89104	3.59063e-05
Cluster_6337	5.34245	0.0274567
Cluster_6339	5.44187	0.00143223
Cluster_6342	6.85272	0.0250743
Cluster_6344	-7.76693	0.00207275
Cluster_6348	6.29636	6.12388e-05
Cluster_6352	-6.24555	0.0127441
Cluster_6354	5.59168	3.49866e-08
Cluster_6358	14.0431	2.61281e-05
Cluster_6359	53.6949	9.92961e-21
Cluster_6361	-8.8399	8.65922e-11
Cluster_6363	9.06339	9.14288e-14
Cluster_6365	11.9989	8.58838e-06
Cluster_6370	10.3729	3.65572e-10
Cluster_6371	13.006	0.000301381
Cluster_6374	10.7677	3.06537e-41
Cluster_6375	5.07003	3.55471e-07
Cluster_6377	6.84871	5.88851e-12
Cluster_6381	10.5314	1.22491e-15
Cluster_6392	6.85881	3.60981e-10
Cluster_6403	5.35015	6.07901e-09
Cluster_6405	5.35432	0.000842602
Cluster_6406	7.36048	4.98751e-09
Cluster_6411	9.96132	0.000232988
Cluster_6429	27.064	6.03411e-48
Cluster_6442	14.8317	2.26459e-14
Cluster_6452	6.77375	1.26392e-17
Cluster_6456	6.9398	3.00401e-13
Cluster_6464	8.4842	1.62512e-24
Cluster_6469	14.4756	1.96568e-52
Cluster_6476	5.87887	1.1152e-10
Cluster_6478	7.84225	2.16832e-15
Cluster_6484	5.92287	4.21203e-18
Cluster_6488	5.19912	0.0201794
Cluster_6489	6.94698	4.40711e-29
Cluster_6497	7.69521	0.00196741
Cluster_6502	-29.0145	0
Cluster_6503	-5.37963	1.32727e-05
Cluster_6504	-9.11261	7.56455e-07
Cluster_6515	7.0563	1.32419e-05
Cluster_6528	8.30378	5.80428e-11
Cluster_6533	-11.0895	2.36026e-37
Cluster_6542	6.47234	1.08488e-09
Cluster_6566	10.2539	1.77137e-46
Cluster_6573	-12.7929	1.72564e-31
Cluster_6574	-9.44964	7.02157e-06
Cluster_6586	-5.68505	8.44809e-07
Cluster_6587	-36.4209	2.91013e-05
Cluster_6591	5.44704	1.33376e-10
Cluster_6594	5.66116	1.59281e-09
Cluster_6601	-19.9448	3.82654e-06
Cluster_6603	5.92163	8.27481e-07
Cluster_6605	-5.92861	0.0091875
Cluster_6613	5.71613	0.00147067
Cluster_6619	7.54602	3.75256e-19
Cluster_6626	6.69621	6.93182e-06
Cluster_6632	9.45122	1.71567e-17
Cluster_6634	7.21638	1.78474e-08
Cluster_6635	-18.3955	6.81583e-07
Cluster_6639	17.2647	9.17694e-70
Cluster_6640	5.6157	8.90218e-05
Cluster_6642	5.57544	7.57824e-08
Cluster_6647	15	0.00185899
Cluster_6649	-5.9269	0.0341144
Cluster_6650	-6.71585	0.00522716
Cluster_6657	-6.99349	2.20824e-09
Cluster_6660	11.4163	5.27877e-21
Cluster_6664	6.55653	1.45401e-10
Cluster_6677	-11.6248	3.19726e-21
Cluster_6682	6.91398	2.58003e-06
Cluster_6683	-6.79254	0.00032335
Cluster_6685	9.29801	4.65155e-06
Cluster_6693	5.27295	3.29571e-08
Cluster_6695	-14.4564	2.11726e-30
Cluster_6702	6.34735	2.33305e-13
Cluster_6712	9.62995	2.27333e-13
Cluster_6713	15.9454	1.96001e-43
Cluster_6715	-11.3318	1.66824e-06
Cluster_6724	7.6579	1.24535e-07
Cluster_6726	-8.9727	1.53552e-06
Cluster_6730	16.6196	1.08488e-09
Cluster_6731	7.48448	1.16944e-08
Cluster_6735	9.24735	4.92438e-08
Cluster_6736	-13.5615	3.9444e-12
Cluster_6737	9.29324	3.61245e-09
Cluster_6742	7.83169	0.000361862
Cluster_6744	5.64645	2.76202e-06
Cluster_6751	-5.97146	2.8199e-06
Cluster_6752	6.66296	0.000842602
Cluster_6758	5.32769	8.87413e-05
Cluster_6760	5.00182	1.13149e-09
Cluster_6761	-9.84832	9.01338e-05
Cluster_6762	5.18441	2.09084e-07
Cluster_6764	-18.9144	1.85455e-26
Cluster_6767	6.7215	3.77587e-31
Cluster_6781	6.00475	3.87074e-08
Cluster_6782	9.16265	1.039e-08
Cluster_6785	8.8173	9.66628e-27
Cluster_6786	8.16839	0.000137155
Cluster_6791	8.92929	0.000200982
Cluster_6796	-6.16011	0.000117986
Cluster_6800	-5.84507	0.00291664
Cluster_6802	6.99304	1.27445e-07
Cluster_6805	14.4278	4.36987e-09
Cluster_6808	6.52983	3.04731e-20
Cluster_6820	-5.67633	0.0276924
Cluster_6821	6.92434	4.75379e-09
Cluster_6825	8.81149	1.42716e-83
Cluster_6842	-11.9073	9.63392e-18
Cluster_6844	8.93084	0.0169886
Cluster_6846	24.2822	3.33352e-15
Cluster_6850	-8.20887	6.46513e-05
Cluster_6854	8.46751	1.29533e-10
Cluster_6858	-8.91141	6.20595e-18
Cluster_6859	6.39218	1.41328e-05
Cluster_6860	5.93847	0.00041552
Cluster_6863	6.98731	1.88708e-08
Cluster_6867	7.57468	0.000212569
Cluster_6870	6.42315	1.06151e-16
Cluster_6881	12.8876	1.05598e-09
Cluster_6884	7.26953	0.00465113
Cluster_6886	6.19536	3.54169e-15
Cluster_6888	-5.73926	0.00213181
Cluster_6889	5.1496	5.28807e-05
Cluster_6903	-7.53838	3.55049e-14
Cluster_6907	-9.02097	7.2002e-05
Cluster_6911	6.12092	1.20335e-22
Cluster_6914	5.14607	1.59885e-10
Cluster_6921	-8.00473	7.04006e-07
Cluster_6922	15.8388	7.41025e-09
Cluster_6930	6.60152	4.89653e-20
Cluster_6932	7.03975	0.000215406
Cluster_6936	-18.3164	2.43249e-34
Cluster_6940	7.52896	0.000117859
Cluster_6947	-5.51653	8.27998e-07
Cluster_6953	5.40012	7.624e-05
Cluster_6954	-5.91038	0.00131883
Cluster_6960	-14.3582	3.41036e-06
Cluster_6962	5.08718	3.2316e-08
Cluster_6964	-5.33679	1.13718e-05
Cluster_6970	20.3517	7.71754e-14
Cluster_6980	6.88564	1.1022e-12
Cluster_6982	-6.80597	8.31851e-06
Cluster_6983	5.74966	0.000186244
Cluster_6988	7.00683	5.16521e-13
Cluster_6991	8.71433	6.29211e-17
Cluster_6992	8.44537	4.09291e-13
Cluster_6993	5.10206	4.07512e-07
Cluster_6996	7.18799	9.18779e-10
Cluster_7000	6.9487	9.2277e-247
Cluster_7003	20.1657	1.77162e-131
Cluster_7007	-5.25831	1.38591e-08
Cluster_7008	6.35871	1.93351e-06
Cluster_7014	10.4578	2.05347e-10
Cluster_7016	5.90638	2.1239e-08
Cluster_7017	8.33325	2.80638e-12
Cluster_7021	6.32824	1.26929e-09
Cluster_7025	6.90677	2.30192e-11
Cluster_7027	5.91407	1.82062e-06
Cluster_7029	8.24923	1.46594e-07
Cluster_7031	5.5958	0.00145483
Cluster_7035	-9.83425	7.10841e-06
Cluster_7041	-6.09614	0.0138415
Cluster_7047	-5.07234	2.82259e-07
Cluster_7053	-10.2747	3.99904e-40
Cluster_7064	-5.54579	6.50349e-05
Cluster_7065	7.35045	3.57304e-18
Cluster_7066	8.90067	2.62366e-14
Cluster_7074	8.79776	0.000865357
Cluster_7078	7.17142	6.84093e-26
Cluster_7087	-5.8826	0.00328089
Cluster_7088	-5.57535	0.000205549
Cluster_7091	5.64519	8.11315e-05
Cluster_7105	15.5514	1.48894e-05
Cluster_7108	10.7189	3.05852e-07
Cluster_7109	10.3273	0.027321
Cluster_7111	12.5801	0.0136998
Cluster_7115	5.69571	0.00059985
Cluster_7117	6.20222	1.59855e-12
Cluster_7121	-7.15097	1.82245e-09
Cluster_7127	6.15334	4.59321e-07
Cluster_7149	18.0056	1.99687e-37
Cluster_7151	6.5282	0.000566544
Cluster_7157	5.82485	4.58653e-07
Cluster_7160	5.16878	5.07045e-05
Cluster_7161	8.45085	3.20601e-11
Cluster_7162	9.57102	4.56209e-21
Cluster_7165	16.4117	1.90835e-06
Cluster_7168	-47.0674	2.95418e-05
Cluster_7169	-9.86726	0.016111
Cluster_7172	7.14013	0.0143102
Cluster_7176	5.4679	4.02729e-06
Cluster_7182	5.39538	1.9362e-10
Cluster_7186	-12.8391	1.22729e-05
Cluster_7188	10.4266	3.51691e-11
Cluster_7189	-5.0991	0.000210708
Cluster_7190	-5.19396	9.27177e-05
Cluster_7194	7.87254	6.1944e-14
Cluster_7200	5.0652	4.11153e-06
Cluster_7204	6.60056	4.10019e-14
Cluster_7211	10.2825	0.000398988
Cluster_7213	-5.69333	0.00300437
Cluster_7218	6.47703	7.9015e-05
Cluster_7221	5.07594	0.000301617
Cluster_7225	-6.94918	1.74606e-05
Cluster_7228	-6.56467	3.85862e-06
Cluster_7233	7.98376	8.00449e-10
Cluster_7236	7.2529	2.05271e-08
Cluster_7242	-37.4041	6.82869e-14
Cluster_7252	-8.00783	2.09111e-05
Cluster_7255	14.4345	9.75117e-26
Cluster_7264	5.69469	3.32164e-14
Cluster_7265	7.77364	0.000118792
Cluster_7266	-17.1872	0
Cluster_7267	-11.9572	0
Cluster_7269	-24.9237	3.04401e-43
Cluster_7272	5.53556	0.00124677
Cluster_7273	-5.70543	2.07995e-07
Cluster_7276	8.44833	3.35142e-05
Cluster_7284	9.95547	0.00349925
Cluster_7290	-8.32015	4.78684e-15
Cluster_7295	5.64909	1.86934e-05
Cluster_7296	9.47588	5.67912e-21
Cluster_7297	-6.16885	0.00133285
Cluster_7303	-5.07549	0.0263161
Cluster_7306	-15.7684	4.37534e-15
Cluster_7308	-5.39067	0.000802823
Cluster_7310	11.4661	1.8299e-13
Cluster_7312	5.18929	0.0446663
Cluster_7315	5.82833	6.63841e-34
Cluster_7321	5.04667	0.00170214
Cluster_7328	5.09243	0.00246145
Cluster_7331	-6.34025	0.00691631
Cluster_7341	7.87693	0.00593834
Cluster_7349	-5.83123	0.00909566
Cluster_7352	7.13701	0.000661157
Cluster_7358	10.6766	1.11045e-05
Cluster_7359	5.33436	4.40244e-06
Cluster_7361	7.01813	3.0013e-05
Cluster_7362	11.0908	2.4325e-25
Cluster_7372	7.77341	1.35961e-09
Cluster_7373	-7.34238	0.0295562
Cluster_7374	6.23248	0.0105744
Cluster_7375	-12.8162	0.00350989
Cluster_7383	-19.2113	2.2136e-05
Cluster_7388	5.85834	2.24833e-07
Cluster_7398	9.65977	4.54164e-99
Cluster_7402	-5.80405	0.000572574
Cluster_7407	10.4451	7.02288e-09
Cluster_7411	6.20042	3.49304e-19
Cluster_7416	7.83002	1.64162e-08
Cluster_7419	16.8485	2.19092e-13
Cluster_7422	7.24681	1.08215e-18
Cluster_7423	15.5329	1.07253e-10
Cluster_7427	5.81003	1.58459e-09
Cluster_7430	5.57886	2.78934e-05
Cluster_7435	6.31674	6.04079e-19
Cluster_7438	5.8839	1.15624e-25
Cluster_7445	-5.05185	2.82003e-09
Cluster_7446	-5.72238	0.00124861
Cluster_7448	-25.9452	6.14407e-09
Cluster_7453	5.85197	3.54208e-10
Cluster_7457	6.70136	1.54962e-08
Cluster_7459	8.7314	6.90651e-05
Cluster_7467	-6.53269	0.00112895
Cluster_7474	-7.88331	0.000318866
Cluster_7475	8.42504	2.26757e-09
Cluster_7478	-6.35339	0.00680199
Cluster_7485	6.04277	1.78166e-16
Cluster_7495	-5.34857	0.00114236
Cluster_7499	-27.3455	9.84549e-62
Cluster_7502	7.62317	0.0277911
Cluster_7504	6.30381	3.99229e-05
Cluster_7507	6.973	8.47418e-07
Cluster_7514	-5.70406	1.6962e-11
Cluster_7515	5.40966	7.99172e-07
Cluster_7520	-6.58178	0.00865936
Cluster_7522	19.9042	1.24697e-22
Cluster_7524	14.8654	2.09551e-13
Cluster_7526	-10.0544	6.84271e-06
Cluster_7528	18.0697	3.18395e-09
Cluster_7535	8.64479	1.32695e-10
Cluster_7542	-7.1852	6.13634e-06
Cluster_7543	13.4757	7.78901e-15
Cluster_7544	7.15639	3.64255e-14
Cluster_7550	-6.20012	0.000278388
Cluster_7562	5.98317	9.28903e-09
Cluster_7566	-24.5689	2.30471e-15
Cluster_7568	15.958	1.54833e-11
Cluster_7578	7.63394	5.51912e-06
Cluster_7579	12.7546	4.69864e-55
Cluster_7588	10.5155	0.00119985
Cluster_7593	5.49367	0.000423188
Cluster_7594	6.64783	2.03695e-07
Cluster_7597	6.80776	4.06664e-11
Cluster_7603	-10.109	0.000613384
Cluster_7605	-5.47583	0.00306407
Cluster_7608	5.05762	5.61804e-05
Cluster_7614	5.28545	5.61958e-11
Cluster_7626	7.129	1.81009e-19
Cluster_7630	-5.66947	0.00688795
Cluster_7631	9.4016	4.50807e-37
Cluster_7632	-25.9572	3.93065e-12
Cluster_7633	6.25355	7.3151e-05
Cluster_7635	8.16885	0.0335964
Cluster_7640	5.72554	1.74497e-09
Cluster_7642	15.0485	1.06853e-27
Cluster_7643	11.5602	6.07759e-06
Cluster_7655	12.6233	1.02396e-09
Cluster_7659	6.19405	0.000162267
Cluster_7660	6.7291	1.9416e-12
Cluster_7673	7.32332	2.33559e-11
Cluster_7680	8.27716	1.47769e-12
Cluster_7685	7.46116	1.29828e-08
Cluster_7687	5.49799	1.79076e-06
Cluster_7689	12.5459	1.27284e-12
Cluster_7694	-9.04155	5.93122e-05
Cluster_7695	-12.8814	4.14053e-11
Cluster_7698	5.30247	4.64832e-09
Cluster_7699	10.1179	3.10773e-14
Cluster_7706	-6.5718	0.00211251
Cluster_7711	5.05156	0.00648343
Cluster_7717	6.74187	2.01092e-07
Cluster_7720	5.47305	2.4745e-07
Cluster_7722	6.47295	3.39657e-05
Cluster_7724	7.40271	1.29457e-20
Cluster_7729	-7.58715	0.00849661
Cluster_7730	8.20268	8.80982e-10
Cluster_7733	6.79021	0.00601888
Cluster_7736	5.01822	0.0146989
Cluster_7737	9.44103	0.0321188
Cluster_7739	8.20509	0.00150281
Cluster_7753	51.0695	1.24917e-09
Cluster_7759	6.20692	1.60441e-12
Cluster_7761	7.18508	9.47417e-11
Cluster_7762	-5.27181	0.000261402
Cluster_7779	6.62499	0.0107543
Cluster_7780	11.5092	4.47544e-06
Cluster_7782	8.6368	1.3713e-07
Cluster_7786	9.80873	4.17702e-12
Cluster_7795	9.25182	6.52934e-17
Cluster_7798	-7.97061	1.50363e-06
Cluster_7799	7.0826	5.2713e-09
Cluster_7801	9.67267	3.35267e-15
Cluster_7803	5.38232	0.000425522
Cluster_7804	-14.6121	9.85994e-07
Cluster_7817	-6.91436	1.24106e-08
Cluster_7823	6.05513	2.9282e-13
Cluster_7825	5.1704	6.42317e-08
Cluster_7829	5.08725	4.20452e-07
Cluster_7832	-5.49096	1.23265e-07
Cluster_7833	7.88725	1.03106e-08
Cluster_7844	5.16125	4.06193e-05
Cluster_7848	10.3864	5.8189e-16
Cluster_7860	11.702	4.10539e-18
Cluster_7864	8.02503	6.4288e-15
Cluster_7866	-6.44699	1.43658e-05
Cluster_7885	5.80017	3.15306e-11
Cluster_7887	-12.0767	1.55509e-48
Cluster_7890	6.26551	0.000169909
Cluster_7892	17.8833	8.70893e-83
Cluster_7897	-11.3057	1.28336e-21
Cluster_7900	8.70131	9.44248e-06
Cluster_7901	-6.35652	4.54819e-07
Cluster_7904	9.22313	9.04787e-25
Cluster_7905	-7.49068	3.01076e-07
Cluster_7908	5.01792	0.043761
Cluster_7914	5.60254	1.4348e-07
Cluster_7915	5.78571	2.15291e-05
Cluster_7916	-13.7131	8.69203e-27
Cluster_7918	13.7488	4.95057e-07
Cluster_7927	-5.69111	0.000593589
Cluster_7931	-5.27869	0.000306156
Cluster_7932	25.1327	1.48018e-93
Cluster_7935	9.15192	4.01493e-18
Cluster_7940	-12.183	1.80383e-09
Cluster_7946	-10.9429	1.92959e-10
Cluster_7955	-14.7663	2.84986e-05
Cluster_7972	-16.6104	9.90991e-10
Cluster_7973	6.71097	1.74034e-06
Cluster_7976	-10.2514	9.92633e-13
Cluster_7977	10.8113	3.08445e-26
Cluster_7983	24.3509	8.76255e-67
Cluster_7985	6.42127	0.00342386
Cluster_7987	-10.3989	9.4712e-15
Cluster_7988	-8.40966	1.43942e-12
Cluster_7996	5.11887	3.65726e-12
Cluster_7998	5.69613	8.91608e-11
Cluster_8006	-5.36549	5.99742e-05
Cluster_8013	-10.7914	1.48666e-12
Cluster_8018	19.1854	3.36614e-13
Cluster_8023	5.82731	7.58479e-05
Cluster_8024	-5.512	0.0105976
Cluster_8034	6.87535	3.25789e-15
Cluster_8035	-6.54565	6.36837e-06
Cluster_8047	24.3148	1.40639e-20
Cluster_8049	5.89475	2.14122e-05
Cluster_8053	10.6422	9.83996e-10
Cluster_8059	-32.5568	4.90874e-21
Cluster_8063	11.0768	4.61131e-10
Cluster_8076	5.84022	1.22734e-07
Cluster_8097	11.7733	1.56991e-12
Cluster_8105	-12.0878	3.26786e-20
Cluster_8107	11.1255	2.9133e-18
Cluster_8111	7.06635	3.72195e-05
Cluster_8121	15.7324	1.55555e-48
Cluster_8122	-5.74335	1.64249e-13
Cluster_8134	-6.74335	0.000413608
Cluster_8136	-11.3467	8.55306e-10
Cluster_8139	12.1967	0.00186948
Cluster_8143	5.50481	1.82165e-08
Cluster_8146	5.0136	1.52029e-07
Cluster_8147	8.5557	4.86252e-06
Cluster_8148	-5.61102	1.76645e-20
Cluster_8149	6.65523	0.000378069
Cluster_8162	6.27668	1.31276e-12
Cluster_8163	10.3431	2.20559e-09
Cluster_8175	5.64621	1.19641e-06
Cluster_8178	5.16488	6.19827e-07
Cluster_8181	5.16306	5.69923e-06
Cluster_8185	6.29033	0.00797154
Cluster_8186	8.75199	1.0986e-17
Cluster_8190	37.2271	5.73606e-170
Cluster_8191	7.65478	8.47687e-05
Cluster_8192	-5.88438	2.4092e-05
Cluster_8195	12.0892	2.66505e-27
Cluster_8220	7.08982	8.39165e-05
Cluster_8223	5.90989	2.65172e-10
Cluster_8224	-5.59466	0.00463799
Cluster_8226	6.87142	5.78572e-21
Cluster_8227	9.63927	1.94086e-10
Cluster_8228	-5.8152	1.65782e-15
Cluster_8233	-7.64807	2.9438e-05
Cluster_8235	5.64847	0.0249772
Cluster_8238	-5.10243	0.0194239
Cluster_8240	5.51524	0.000238988
Cluster_8260	7.98439	7.24821e-18
Cluster_8262	5.06402	3.90502e-06
Cluster_8264	6.28848	7.32039e-06
Cluster_8266	7.08768	9.20693e-10
Cluster_8267	24.7375	3.0092e-44
Cluster_8271	16.166	1.56159e-55
Cluster_8272	-6.54158	0.0091253
Cluster_8275	5.01922	1.34858e-06
Cluster_8277	-5.16394	0.00314737
Cluster_8280	5.76828	1.81798e-13
Cluster_8283	-7.89323	0.000103086
Cluster_8292	-9.9597	1.40397e-10
Cluster_8296	-10.7465	2.85817e-15
Cluster_8302	-32.9932	0.0186269
Cluster_8311	-5.74334	0.000643969
Cluster_8313	7.76309	1.59368e-25
Cluster_8319	-7.13265	1.69452e-09
Cluster_8322	7.29491	2.48212e-05
Cluster_8323	-5.10712	2.28331e-06
Cluster_8324	5.33264	3.23068e-08
Cluster_8357	-5.79006	0.0396091
Cluster_8358	6.37004	0.00202367
Cluster_8359	7.62835	2.31784e-06
Cluster_8363	-5.59558	3.71251e-06
Cluster_8367	5.7497	7.05433e-07
Cluster_8369	5.49736	3.76078e-09
Cluster_8370	6.44846	2.09763e-18
Cluster_8378	5.71777	1.4557e-13
Cluster_8379	-9.51975	8.01263e-06
Cluster_8384	-7.18696	3.48474e-07
Cluster_8386	-5.37273	0.000689494
Cluster_8391	-13.6032	4.93517e-21
Cluster_8395	-12.0601	8.21546e-24
Cluster_8396	10.1325	4.10567e-20
Cluster_8398	5.23068	3.11324e-08
Cluster_8400	5.21022	3.73236e-15
Cluster_8406	7.04166	0.000303021
Cluster_8411	11	0.00158524
Cluster_8413	6.44263	6.04079e-19
Cluster_8422	6.95242	5.05021e-08
Cluster_8425	-5.66734	0.000214634
Cluster_8429	-9.09962	2.97234e-05
Cluster_8433	7.86549	2.21348e-07
Cluster_8437	5.99879	2.54485e-06
Cluster_8438	10.4901	1.94106e-27
Cluster_8440	6.85999	2.24146e-05
Cluster_8444	-14.619	0.000254374
Cluster_8448	24.3258	2.02383e-36
Cluster_8449	10.8181	1.66956e-34
Cluster_8453	-6.49997	0.0152337
Cluster_8456	-10.7489	2.81311e-10
Cluster_8460	-7.94537	0.000978639
Cluster_8461	-6.67209	0.00431064
Cluster_8465	5.89411	0.000295126
Cluster_8470	7.8432	1.85025e-07
Cluster_8474	-5.35659	0.00265265
Cluster_8476	-6.03555	1.43254e-07
Cluster_8479	7.83618	4.4596e-05
Cluster_8480	15.946	4.57163e-49
Cluster_8482	9.41743	0.00524754
Cluster_8483	-12.8796	2.66706e-06
Cluster_8489	9.31389	3.03783e-10
Cluster_8495	30.2224	5.07196e-21
Cluster_8501	5.73931	0.000774177
Cluster_8504	-5.38159	0.00033546
Cluster_8508	-16.1972	3.64205e-05
Cluster_8510	6.82437	4.94783e-05
Cluster_8516	6.40707	7.59066e-09
Cluster_8518	8.8727	4.82759e-25
Cluster_8521	11.0052	2.9942e-06
Cluster_8523	8.6889	4.09837e-09
Cluster_8536	-7.47037	0.0173498
Cluster_8541	6.0818	1.76429e-16
Cluster_8544	-5.53056	0.0269747
Cluster_8547	14.0929	2.24272e-08
Cluster_8549	5.88537	3.37127e-10
Cluster_8551	26.7022	4.06134e-14
Cluster_8552	-7.27706	0.00110851
Cluster_8553	13.0288	1.02416e-18
Cluster_8554	29.7987	2.29588e-45
Cluster_8555	28.3621	1.49993e-33
Cluster_8561	6.02925	2.4613e-08
Cluster_8562	-10.967	1.27556e-06
Cluster_8563	7.10183	2.08804e-11
Cluster_8572	7.40599	1.79538e-10
Cluster_8573	-5.41591	7.60851e-06
Cluster_8580	-12.0074	2.11557e-16
Cluster_8583	-25.2475	0.000252272
Cluster_8586	-23.9063	6.96349e-21
Cluster_8592	-6.56083	8.0598e-11
Cluster_8596	-5.9711	2.22973e-18
Cluster_8609	-8.95482	2.15942e-06
Cluster_8614	7.62284	1.14247e-10
Cluster_8617	5.07489	1.33131e-07
Cluster_8620	9.97626	1.04636e-287
Cluster_8622	-20.0038	0.000899099
Cluster_8623	-15.0776	5.86861e-11
Cluster_8625	14.352	2.81692e-42
Cluster_8630	-6.2337	0.0164019
Cluster_8634	-6.4747	0.00309909
Cluster_8651	-6.11984	2.64405e-05
Cluster_8652	6.1626	5.54857e-06
Cluster_8663	19.2516	1.71272e-06
Cluster_8672	6.32355	0.000105829
Cluster_8673	11.0947	9.15252e-14
Cluster_8677	-5.93359	0.00150221
Cluster_8678	47.6974	4.38881e-25
Cluster_8679	-10.7381	2.29929e-06
Cluster_8688	8	0.00202224
Cluster_8696	5.93275	3.47491e-08
Cluster_8701	7.18654	0.0290923
Cluster_8709	5.85761	0
Cluster_8710	8.91247	8.4727e-05
Cluster_8714	-6.05834	0.00484147
Cluster_8720	8.01969	0.00176071
Cluster_8729	-7.32961	3.88243e-08
Cluster_8737	8.07997	2.91988e-18
Cluster_8748	6.56232	1.57227e-12
Cluster_8757	6.03305	0.021317
Cluster_8758	-9.50906	5.05119e-06
Cluster_8759	8.75773	7.94935e-14
Cluster_8779	10.0474	2.53747e-24
Cluster_8799	-5.2756	0.000730363
Cluster_8800	5.24514	2.4188e-12
Cluster_8806	13.6182	2.28612e-10
Cluster_8813	-10.1014	4.37227e-17
Cluster_8814	25.1027	7.036e-05
Cluster_8816	6.70049	9.79484e-21
Cluster_8822	6.08483	1.29763e-05
Cluster_8836	-7.4212	3.44439e-08
Cluster_8838	8.28023	3.37889e-14
Cluster_8851	-12.1341	4.75876e-12
Cluster_8852	-15.6713	1.67172e-08
Cluster_8855	-8.6963	5.5368e-07
Cluster_8856	9.8389	1.35916e-07
Cluster_8900	-23.7098	1.7737e-20
Cluster_8910	5.81489	1.23102e-23
Cluster_8913	5.57322	0.0195206
Cluster_8918	5.07611	2.69569e-07
Cluster_8921	6.6811	0.000945012
Cluster_8926	6.1968	0.000361998
Cluster_8928	5.7149	4.08453e-05
Cluster_8933	-8.60168	8.14278e-12
Cluster_8941	-12.465	1.72193e-07
Cluster_8945	-7.16423	0.00328474
Cluster_8950	7.60463	0.000129137
Cluster_8952	11.7441	2.61044e-05
Cluster_8964	-9.19706	4.41998e-10
Cluster_8973	-51.4505	1.61052e-18
Cluster_8975	-5.24821	4.09026e-08
Cluster_8982	-24.1084	7.00421e-21
Cluster_8984	5.53353	8.3196e-05
Cluster_8987	5.63904	4.34191e-07
Cluster_8994	-7.61298	4.54843e-08
Cluster_8998	7.1328	0.000320093
Cluster_8999	-6.02737	0.00191319
Cluster_9000	-5.27421	0.0237127
Cluster_9011	9.71651	7.39492e-12
Cluster_9024	-10.7023	0.000164823
Cluster_9025	6.06974	6.14046e-05
Cluster_9034	-9.91144	6.83697e-11
Cluster_9048	7.95388	8.69615e-06
Cluster_9052	7.03026	0.000290089
Cluster_9065	6.11832	5.69414e-08
Cluster_9069	5.45967	7.97658e-06
Cluster_9071	9.70896	1.68454e-14
Cluster_9074	-16.4868	3.90495e-27
Cluster_9080	-12.392	2.5085e-13
Cluster_9083	6.73643	2.04212e-05
Cluster_9084	5.24995	0.00349564
Cluster_9085	12.515	0.000642412
Cluster_9102	5.87636	8.36937e-06
Cluster_9103	-8.38923	2.64797e-09
Cluster_9104	5.06056	1.02467e-09
Cluster_9105	7.31152	4.00424e-08
Cluster_9109	-8.37772	1.12607e-05
Cluster_9124	6.03289	3.65584e-07
Cluster_9137	-9.02597	0.0302236
Cluster_9138	-7.29856	2.67479e-07
Cluster_9142	14.8964	3.48576e-44
Cluster_9144	13.4777	2.79953e-49
Cluster_9146	-23.0809	2.81969e-16
Cluster_9147	-28.3524	1.72907e-22
Cluster_9148	-7.46161	0.00112077
Cluster_9153	6.10261	9.11566e-06
Cluster_9163	-17.2986	1.40763e-07
Cluster_9180	12.5179	6.50865e-11
Cluster_9184	-7.28523	4.58807e-05
Cluster_9185	12.1873	8.71654e-183
Cluster_9192	-6.91437	2.22045e-15
Cluster_9193	-7.87715	7.43341e-09
Cluster_9196	5.80429	1.27973e-06
Cluster_9203	-8.37182	0.0354659
Cluster_9205	5.04505	0.000233683
Cluster_9212	-6.33883	8.85623e-05
Cluster_9216	-7.98425	1.85528e-13
Cluster_9221	8.51042	5.88995e-06
Cluster_9226	7.51395	0.00353217
Cluster_9235	16.8459	3.5812e-15
Cluster_9243	6.47546	8.22029e-06
Cluster_9246	10.8067	5.4557e-26
Cluster_9252	5.3647	0.017836
Cluster_9256	-28.3296	6.9561e-112
Cluster_9261	7.78085	2.39088e-10
Cluster_9263	5.23133	5.90414e-11
Cluster_9267	7.14116	1.37073e-15
Cluster_9270	5.01869	7.96544e-10
Cluster_9271	6.09593	2.27036e-07
Cluster_9272	-22.6509	1.62942e-07
Cluster_9273	5.24829	0.0494105
Cluster_9277	20.2931	4.29584e-07
Cluster_9284	7.67556	1.36079e-31
Cluster_9285	-9.66533	6.2118e-22
Cluster_9288	-6.31126	1.3066e-05
Cluster_9290	10.973	2.53958e-12
Cluster_9292	-17.768	2.1661e-11
Cluster_9293	8.19947	4.4371e-12
Cluster_9302	-13.7124	0.000296829
Cluster_9314	9.75859	2.22967e-09
Cluster_9319	5.71339	1.49075e-06
Cluster_9324	13.5072	1.11222e-06
Cluster_9338	12.1536	2.48892e-12
Cluster_9342	5.96095	0.027872
Cluster_9352	5.18212	1.72193e-07
Cluster_9365	7.55446	4.35048e-14
Cluster_9375	5.74121	2.39244e-07
Cluster_9378	5.225	1.16941e-09
Cluster_9386	7.25868	1.93777e-63
Cluster_9390	5.06584	0.00112714
Cluster_9392	-9.27298	3.69246e-06
Cluster_9396	-13.5903	2.0963e-09
Cluster_9399	-7.36789	0.0143979
Cluster_9400	12.9988	2.58905e-22
Cluster_9402	5.94477	0.00190149
Cluster_9408	5.82798	5.59012e-07
Cluster_9411	6.89109	0.00318872
Cluster_9412	7.02209	1.3409e-05
Cluster_9413	6.61254	0.0129446
Cluster_9420	7.3015	9.36423e-15
Cluster_9424	5.96688	0.00017861
Cluster_9425	5.39084	0.0153069
Cluster_9426	-6.91121	2.48324e-06
Cluster_9431	-9.74261	6.19523e-06
Cluster_9433	11.365	1.03187e-06
Cluster_9439	6.11028	1.45769e-07
Cluster_9441	9.01511	4.68663e-20
Cluster_9466	-6.68884	0.00381451
Cluster_9467	6.97459	2.161e-09
Cluster_9473	7.63494	9.93828e-26
Cluster_9476	5.2276	0.000241906
Cluster_9477	5.97202	2.14331e-05
Cluster_9483	-16.0546	7.75438e-06
Cluster_9485	-11.1143	0.000969662
Cluster_9486	-8.28837	0.003378
Cluster_9499	7.79635	4.04608e-10
Cluster_9500	5.77448	5.78292e-09
Cluster_9504	6.21417	1.17853e-07
Cluster_9510	7.43199	0.000995967
Cluster_9514	8.31622	2.04539e-21
Cluster_9521	7.75528	2.09765e-08
Cluster_9531	5.71823	3.07703e-13
Cluster_9538	-7.43805	7.97943e-09
Cluster_9541	19.6848	4.11168e-27
Cluster_9551	7.44897	6.00747e-15
Cluster_9556	8.08419	3.67841e-09
Cluster_9561	11.1234	8.96077e-08
Cluster_9565	11.1365	4.59036e-08
Cluster_9566	5.0779	5.03128e-09
Cluster_9568	6.73382	3.24028e-09
Cluster_9569	-7.73908	0.000176616
Cluster_9576	7.86057	3.42233e-09
Cluster_9587	9.48229	2.61167e-10
Cluster_9590	7.23776	5.20838e-16
Cluster_9594	-6.27818	6.47198e-06
Cluster_9595	7.92333	0.00541986
Cluster_9601	9.03243	4.80482e-10
Cluster_9610	6.35982	3.10848e-12
Cluster_9615	6.87557	4.61268e-11
Cluster_9616	-11.635	0.000243739
Cluster_9618	-18.6423	2.18292e-19
Cluster_9623	7.51905	2.12095e-09
Cluster_9627	-5.72946	1.729e-06
Cluster_9635	9.94329	2.76193e-07
Cluster_9639	6.30114	1.33275e-06
Cluster_9645	5.28466	0.00122078
Cluster_9649	7.84172	2.19092e-13
Cluster_9650	14.8102	2.43339e-57
Cluster_9653	-13.4647	2.09856e-09
Cluster_9656	6.33968	1.28254e-05
Cluster_9657	8.61276	0.0020917
Cluster_9659	-5.68054	8.96077e-08
Cluster_9660	22.49	3.75992e-09
Cluster_9661	-11.1444	1.04158e-06
Cluster_9666	9.10799	1.93451e-06
Cluster_9672	-6.15489	0.000538307
Cluster_9681	12.111	5.44358e-39
Cluster_9689	6.31816	0.000330382
Cluster_9707	-8.45075	0.0177182
Cluster_9713	6.34177	3.00561e-25
Cluster_9714	8.09359	1.66813e-25
Cluster_9717	23.8742	9.06745e-07
Cluster_9720	9.01324	1.07144e-06
Cluster_9734	8.6261	2.26471e-19
Cluster_9739	19.9872	9.67714e-09
Cluster_9750	-7.61607	1.29862e-05
Cluster_9752	-9.45833	0.00425048
Cluster_9753	-12.7946	1.76706e-21
Cluster_9759	-5.67694	1.98596e-09
Cluster_9760	5.60546	1.85109e-06
Cluster_9765	15.5721	8.86346e-05
Cluster_9768	8.91213	4.57147e-13
Cluster_9770	5.95113	4.54282e-08
Cluster_9773	-34.409	5.47125e-42
Cluster_9774	7.34367	2.16307e-16
Cluster_9777	26.9914	0.00127765
Cluster_9779	-5.32431	0.000241144
Cluster_9781	7.28194	4.5632e-08
Cluster_9784	9.01085	6.14562e-08
Cluster_9785	5.4437	0.00738904
Cluster_9786	9.2463	0.00280891
Cluster_9788	7.33226	9.18072e-19
Cluster_9791	-8.18392	3.68651e-15
Cluster_9800	-7.85523	0.000400307
Cluster_9808	5.46779	1.31857e-05
Cluster_9809	-17.1746	2.44974e-05
Cluster_9815	-18.0302	1.33298e-114
Cluster_9818	6.64588	0.0109419
Cluster_9821	5.72581	1.86074e-10
Cluster_9829	7.8966	3.70753e-15
Cluster_9830	-7.14776	6.77314e-07
Cluster_9835	5.22172	1.98405e-64
Cluster_9846	6.78267	0.0184519
Cluster_9847	9.79385	0.0264157
Cluster_9848	16.6667	5.55057e-05
Cluster_9852	53.5185	5.30068e-08
Cluster_9854	7.17176	2.67393e-12
Cluster_9855	28.1707	1.27054e-09
Cluster_9863	5.17072	0.00119113
Cluster_9865	6.43008	0.000348423
[truncated: 4,038 more rows]

## Sheet: 4I
Supplementary Table 4I. sCTGR differentially methylated (PHYA BK x WT BK)
Cluster_ID	%diff_methyl	FDR
Cluster_11	5.3199	4.68981e-58
Cluster_17	-7.0631	1.65525e-05
Cluster_22	-11.1417	1.1772e-23
Cluster_27	5.21381	4.3448e-12
Cluster_29	6.32446	0
Cluster_34	6.13986	7.81114e-09
Cluster_40	8.92743	0
Cluster_42	8.06078	0.0269414
Cluster_45	5.65778	0.000172605
Cluster_53	6.99334	0
Cluster_54	5.2595	3.85161e-05
Cluster_58	8.15442	1.76782e-143
Cluster_70	5.11247	4.31693e-304
Cluster_72	7.17629	0.000269971
Cluster_73	5.96805	0
Cluster_74	9.21392	2.78449e-10
Cluster_78	-8.28647	8.70929e-50
Cluster_83	-5.78086	1.97122e-25
Cluster_84	-6.11399	0
Cluster_118	5.05806	1.28885e-10
Cluster_120	-7.07864	0
Cluster_121	-6.19372	1.45736e-153
Cluster_126	8.86971	1.2493e-96
Cluster_127	5.50267	4.41249e-37
Cluster_130	-8.86769	0.00342251
Cluster_132	-5.6795	5.82025e-06
Cluster_134	7.28429	0.000146993
Cluster_141	-14.8351	0.00577856
Cluster_142	16.4802	4.77867e-15
Cluster_158	-15.069	8.16733e-06
Cluster_163	-6.29667	2.59868e-08
Cluster_164	-13.21	1.14477e-14
Cluster_165	-6.77814	1.40922e-47
Cluster_167	-5.58111	0.043411
Cluster_182	11.2132	3.25348e-05
Cluster_189	17.438	9.18576e-18
Cluster_193	5.69101	0.00416789
Cluster_194	6.4092	7.11694e-24
Cluster_198	10.6613	0.0068993
Cluster_200	6.10151	3.72082e-09
Cluster_204	-5.38044	0.000176343
Cluster_207	-7.12582	2.62148e-08
Cluster_212	9.01158	5.10602e-17
Cluster_213	10.7772	6.00925e-38
Cluster_216	5.91789	1.04646e-296
Cluster_220	5.75601	3.05052e-05
Cluster_227	6.36231	0.00865774
Cluster_229	-27.3057	0
Cluster_230	5.74822	0.0107328
Cluster_238	5.66534	0.0164907
Cluster_240	6.24429	6.67984e-08
Cluster_248	8.18211	3.06899e-14
Cluster_249	7.20591	1.98016e-17
Cluster_250	6.24966	3.08928e-11
Cluster_254	-5.62211	2.1869e-128
Cluster_258	11.9914	5.75101e-19
Cluster_266	-8.6565	7.15209e-12
Cluster_268	6.80453	9.81784e-31
Cluster_273	9.00323	0.0398377
Cluster_274	6.76669	1.19069e-06
Cluster_275	-13.1526	5.50111e-70
Cluster_279	7.37575	0.00799037
Cluster_280	6.32525	0.000202533
Cluster_282	-5.64483	5.92641e-07
Cluster_283	-8.26572	5.95361e-08
Cluster_292	7.19349	2.29798e-16
Cluster_293	-7.37855	5.03091e-13
Cluster_294	-5.85871	0.00167308
Cluster_298	-15.7561	1.32896e-22
Cluster_307	8.178	8.78726e-06
Cluster_309	13.5968	2.74301e-08
Cluster_315	25.7143	0.00198912
Cluster_324	5.75283	1.43227e-16
Cluster_327	6.2706	2.5715e-14
Cluster_328	6.12826	7.824e-14
Cluster_330	6.40583	2.48405e-05
Cluster_332	6.42327	0.00853958
Cluster_358	-8.97821	8.24242e-05
Cluster_365	-6.88225	2.46049e-07
Cluster_372	20.6714	0.000621031
Cluster_376	6.08715	3.48939e-16
Cluster_381	-10.1776	0.033295
Cluster_383	5.51824	0.000111456
Cluster_385	10.0654	5.55342e-05
Cluster_392	7.30211	2.41444e-12
Cluster_404	-5.95565	8.56938e-91
Cluster_417	-7.92619	0.0220273
Cluster_418	-28.1567	0.000197308
Cluster_423	7.04316	0.000437815
Cluster_425	7.38036	0.000263418
Cluster_427	5.10116	0.00167094
Cluster_447	10.5773	5.41214e-05
Cluster_450	6.14298	1.58922e-06
Cluster_451	5.30465	0.000197831
Cluster_458	12.2706	2.08547e-08
Cluster_464	-7.39657	3.62064e-14
Cluster_466	-5.96659	1.17604e-05
Cluster_468	-12.5878	1.3999e-05
Cluster_470	5.91067	0.00533911
Cluster_471	20.073	5.56572e-09
Cluster_472	5.53774	0.000277485
Cluster_478	18.7542	0.00553858
Cluster_482	5.9041	8.57955e-05
Cluster_483	5.0872	0.000205434
Cluster_501	9.5144	5.46287e-19
Cluster_506	5.73314	4.84712e-07
Cluster_507	31.875	2.36444e-11
Cluster_509	8.3144	6.35803e-12
Cluster_512	6.29754	0.00274107
Cluster_518	6.4045	0.0099687
Cluster_529	-6.87632	7.49628e-07
Cluster_530	-6.80263	6.84472e-08
Cluster_531	5.63187	2.54603e-08
Cluster_532	-17.5953	2.01204e-10
Cluster_535	-6.09604	2.52734e-07
Cluster_537	6.3445	0.00410763
Cluster_540	-5.28481	0.0325538
Cluster_541	-8.2638	1.85693e-05
Cluster_544	18.0186	6.07749e-20
Cluster_546	13.4425	6.30864e-17
Cluster_548	6.3848	4.54058e-08
Cluster_550	-29.3286	0.0130423
Cluster_551	13.1796	4.37982e-07
Cluster_553	7.48015	8.12101e-06
Cluster_556	5.77999	4.25294e-07
Cluster_557	8.25279	0.00165133
Cluster_559	19.4421	8.71851e-29
Cluster_567	5.8765	1.77827e-12
Cluster_570	6.39855	2.74554e-09
Cluster_576	6.4325	0.000909645
Cluster_577	7.37131	1.74655e-13
Cluster_578	5.31667	1.77655e-20
Cluster_587	5.53373	0.000210741
Cluster_591	20.6634	4.75715e-18
Cluster_593	-9.02832	4.50769e-26
Cluster_598	11.6739	3.43552e-11
Cluster_602	-30.2881	1.4948e-14
Cluster_605	6.93835	0.00257002
Cluster_609	12.4374	6.13093e-08
Cluster_620	-10.8978	2.28003e-07
Cluster_621	-5.58623	0.000104683
Cluster_629	8.47915	0.000834157
Cluster_633	9.64399	5.08137e-15
Cluster_645	8.40699	1.15641e-05
Cluster_646	-19.1131	3.95173e-13
Cluster_656	6.13187	1.26908e-09
Cluster_665	7.21481	0.0016858
Cluster_666	6.67932	8.48218e-12
Cluster_667	-6.1115	0.00775421
Cluster_668	-9.26721	1.60207e-09
Cluster_672	6.24697	6.0261e-07
Cluster_674	13.7054	0.00228024
Cluster_679	11.6783	9.85871e-21
Cluster_682	14.0169	2.44857e-08
Cluster_685	5.95877	4.86981e-08
Cluster_687	5.87145	8.69547e-12
Cluster_693	8.24827	5.61324e-24
Cluster_696	6.65694	1.78367e-09
Cluster_706	-16.3959	2.17055e-06
Cluster_711	-6.34441	0.00873535
Cluster_713	-30.4525	2.94842e-09
Cluster_715	-7.28655	3.43718e-05
Cluster_717	6.33492	1.17298e-08
Cluster_719	-6.59965	4.14592e-06
Cluster_726	5.24634	1.58711e-12
Cluster_727	-24.6978	4.77204e-06
Cluster_732	-7.96852	5.91916e-07
Cluster_735	8.77226	1.81075e-20
Cluster_736	-7.85374	0.00726924
Cluster_743	-13.1533	3.74163e-05
Cluster_755	5.60984	5.6078e-15
Cluster_756	8.7725	6.43305e-22
Cluster_766	6.15599	0.0163578
Cluster_768	5.03011	0.000219479
Cluster_774	-7.80829	0.000328974
Cluster_776	-6.96451	1.69124e-10
Cluster_786	8.24436	0.000318802
Cluster_791	7.71899	6.85557e-05
Cluster_807	-34.8606	3.81586e-37
Cluster_810	15.2542	3.95037e-14
Cluster_821	-12.1317	4.42156e-11
Cluster_822	7.27967	2.79287e-10
Cluster_827	-5.9867	1.02624e-05
Cluster_837	-11.111	1.6833e-10
Cluster_862	-8.26628	4.57086e-06
Cluster_865	-6.6273	0.0125457
Cluster_867	5.40965	1.14533e-09
Cluster_870	-7.61129	2.28332e-07
Cluster_871	-9.72403	2.63515e-08
Cluster_873	6.96774	1.67559e-20
Cluster_876	5.93799	1.10348e-05
Cluster_878	7.19762	0.000100775
Cluster_881	7.01957	1.47372e-08
Cluster_883	10.975	4.16891e-15
Cluster_885	-5.13871	3.65126e-06
Cluster_896	7.56071	2.90775e-08
Cluster_897	-5.86409	0.000539098
Cluster_904	-5.447	0.0384827
Cluster_908	44.8638	8.79845e-19
Cluster_913	11.8546	5.82891e-15
Cluster_914	6.83859	1.72832e-05
Cluster_915	8.81595	1.02639e-13
Cluster_917	-5.66861	0.00342682
Cluster_918	-5.68778	5.05608e-07
Cluster_921	-7.78046	2.42051e-16
Cluster_925	-95	2.87242e-08
Cluster_927	9.74606	5.38677e-08
Cluster_930	-6.29347	2.05123e-10
Cluster_931	11.3699	6.63703e-05
Cluster_940	-43.2869	3.52842e-171
Cluster_944	-5.03599	3.30891e-06
Cluster_950	-29.3716	3.51427e-85
Cluster_955	-8.30186	2.18948e-06
Cluster_959	-5.68983	9.89906e-13
Cluster_961	28.2129	9.89023e-33
Cluster_967	-5.23644	4.95111e-06
Cluster_972	5.9235	2.25013e-06
Cluster_979	-8.66749	9.3968e-05
Cluster_980	-5.15746	4.72916e-06
Cluster_984	10.6103	1.27243e-14
Cluster_986	-5.34129	0.000464678
Cluster_988	-26.5446	6.07975e-11
Cluster_996	5.5294	0.000286921
Cluster_998	-13.5781	1.16085e-16
Cluster_1001	5.46477	0.000161392
Cluster_1004	9.8062	7.45133e-12
Cluster_1011	8.92686	7.96382e-22
Cluster_1016	6.00238	7.64731e-07
Cluster_1020	-5.61137	0.00143562
Cluster_1023	-9.82559	0.000116504
Cluster_1033	8.50026	2.05681e-27
Cluster_1042	6.05993	0.0118762
Cluster_1045	-10.3334	3.81811e-08
Cluster_1046	5.63692	7.56788e-06
Cluster_1049	6.10433	3.21477e-07
Cluster_1055	-9.39862	0.00102512
Cluster_1059	6.83702	5.19324e-05
Cluster_1060	13.3383	1.45997e-09
Cluster_1063	-6.31515	0.0388761
Cluster_1066	-9.38926	3.07556e-05
Cluster_1069	6.32126	0.00232674
Cluster_1071	-5.00816	0.00258687
Cluster_1072	5.76848	0.0443176
Cluster_1075	6.49909	3.03531e-08
Cluster_1076	5.36381	1.10514e-05
Cluster_1077	6.42856	3.39145e-12
Cluster_1079	-14.141	9.70251e-12
Cluster_1082	6.35275	0.000668017
Cluster_1088	-15.4138	0.00210229
Cluster_1091	6.26135	2.10873e-06
Cluster_1095	7.45229	4.82959e-11
Cluster_1097	6.85213	2.24693e-19
Cluster_1103	5.45147	0.00750204
Cluster_1117	18.3643	2.57481e-13
Cluster_1120	6.66853	4.78249e-06
Cluster_1126	5.31902	1.52133e-07
Cluster_1131	7.62113	4.32181e-13
Cluster_1134	9.80838	0.0415428
Cluster_1138	-6.89391	3.92777e-12
Cluster_1139	5.50588	0.000629919
Cluster_1142	-8.59737	0.000177218
Cluster_1143	5.23316	0.000110266
Cluster_1154	7.4898	0.0100427
Cluster_1159	6.82716	0.00500586
Cluster_1160	-7.3187	2.96577e-14
Cluster_1169	-9.68737	8.29816e-15
Cluster_1176	6.28031	0.0187885
Cluster_1181	10.847	5.2961e-29
Cluster_1183	-11.3106	4.73884e-27
Cluster_1184	-5.52365	0.000229317
Cluster_1187	5.69132	0.000599518
Cluster_1188	5.21425	8.00108e-22
Cluster_1190	-6.02481	3.63249e-08
Cluster_1201	-10.7476	4.59933e-28
Cluster_1209	5.96355	6.88187e-12
Cluster_1215	7.38038	0.00972456
Cluster_1216	7.09533	0.00507781
Cluster_1222	-55	0.000830606
Cluster_1223	-5.97654	0.0352944
Cluster_1226	16.4506	0.000460274
Cluster_1235	-29.0769	7.3495e-27
Cluster_1238	7.1437	1.16803e-08
Cluster_1255	6.33185	0.00456157
Cluster_1256	9.64031	0.0290668
Cluster_1262	6.81968	0.0048321
Cluster_1264	6.65271	0.0222678
Cluster_1269	12.9218	3.38593e-07
Cluster_1270	-10.0608	1.86075e-25
Cluster_1272	5.17083	1.83798e-12
Cluster_1274	5.29567	5.69556e-08
Cluster_1275	-6.08674	0.00908467
Cluster_1277	5.8186	0.00161177
Cluster_1279	21.402	9.47866e-33
Cluster_1281	-6.0425	0.00486922
Cluster_1282	6.4305	6.40247e-08
Cluster_1288	-7.31132	4.47373e-07
Cluster_1291	5.14196	3.23204e-12
Cluster_1302	20.4606	1.37532e-10
Cluster_1303	7.56598	9.81171e-13
Cluster_1313	7.55814	0.022041
Cluster_1315	6.99328	6.09913e-08
Cluster_1320	5.13545	7.44789e-08
Cluster_1321	-20.1007	0.00107884
Cluster_1330	8.01398	5.39302e-11
Cluster_1338	-14.868	7.37314e-07
Cluster_1353	-6.09487	6.30013e-08
Cluster_1361	10.3247	6.04374e-07
Cluster_1364	5.72102	2.93683e-05
Cluster_1368	-8.15349	0.00370159
Cluster_1369	10.0919	0.000723894
Cluster_1370	-8.17195	5.43008e-09
Cluster_1373	23.5271	7.77869e-12
Cluster_1379	6.17439	4.47455e-05
Cluster_1380	6.98854	6.92554e-06
Cluster_1383	-5.00687	3.50987e-05
Cluster_1386	6.22599	6.93976e-20
Cluster_1389	10.844	3.32188e-08
Cluster_1390	8.71821	1.3897e-10
Cluster_1391	-9.56798	0.000186107
Cluster_1397	9.05272	2.5486e-14
Cluster_1398	6.85032	6.52675e-08
Cluster_1407	8.88244	2.62272e-12
Cluster_1411	11.6242	0.00136502
Cluster_1412	-9.63571	0.0116372
Cluster_1414	7.34735	0.00835061
Cluster_1416	5.18068	4.45857e-06
Cluster_1419	-5.43068	5.73933e-07
Cluster_1427	-26.5212	6.72047e-12
Cluster_1447	16.6427	5.77222e-36
Cluster_1458	13.2028	0
Cluster_1459	-9.30752	2.39006e-09
Cluster_1460	11.8724	1.91028e-05
Cluster_1466	6.75322	0.0002257
Cluster_1472	5.08591	4.60877e-08
Cluster_1473	-8.9293	9.83901e-07
Cluster_1474	6.7678	6.40166e-09
Cluster_1478	6.20772	0.0233685
Cluster_1486	6.43133	5.6334e-10
Cluster_1490	11.9038	9.83564e-06
Cluster_1492	-11.8647	1.49675e-07
Cluster_1494	-6.16453	0.0325848
Cluster_1495	-20.3977	3.15719e-27
Cluster_1499	6.51691	2.2805e-07
Cluster_1507	11.2799	2.71183e-05
Cluster_1508	-14.8445	0.0268257
Cluster_1511	8.5865	1.43105e-10
Cluster_1514	-19.857	1.50964e-18
Cluster_1517	6.54427	3.81786e-11
Cluster_1525	-5.59673	5.02529e-08
Cluster_1527	6.08796	2.45001e-07
Cluster_1533	7.84334	0.00653984
Cluster_1534	5.66813	5.78948e-20
Cluster_1541	-17.5021	3.87279e-06
Cluster_1543	10.5067	0.0188343
Cluster_1544	6.40983	0.0218018
Cluster_1546	7.42076	5.29231e-06
Cluster_1556	-13.414	7.65731e-16
Cluster_1557	12.3982	7.2329e-07
Cluster_1558	-8.00232	1.23001e-06
Cluster_1559	6.04013	0.000250001
Cluster_1564	7.01945	2.20662e-05
Cluster_1568	5.34635	8.47826e-06
Cluster_1587	-17.9918	0.000340895
Cluster_1595	-6.38943	1.23357e-05
Cluster_1600	6.1586	3.11076e-19
Cluster_1602	-5.25836	0.0220581
Cluster_1603	7.21557	0.000329862
Cluster_1605	5.58442	2.14387e-08
Cluster_1606	9.88053	1.58659e-18
Cluster_1607	6.07231	0.0137417
Cluster_1611	5.61547	9.21312e-06
Cluster_1612	5.28199	6.39767e-08
Cluster_1613	7.5218	3.69143e-06
Cluster_1618	8.31417	2.47316e-05
Cluster_1620	5.60905	1.79168e-06
Cluster_1630	13.2332	0.000223591
Cluster_1631	7.57533	1.03487e-07
Cluster_1637	-10.6936	6.60627e-05
Cluster_1646	-10.3783	2.4776e-17
Cluster_1648	13.0386	7.57124e-09
Cluster_1653	-21.8749	2.27898e-25
Cluster_1659	9.52684	1.99655e-10
Cluster_1662	11.0667	0.00127967
Cluster_1666	6.71212	7.75862e-06
Cluster_1685	5.03817	2.21713e-07
Cluster_1702	5.51531	8.73692e-12
Cluster_1711	5.43991	4.26002e-32
Cluster_1712	5.73167	1.59156e-16
Cluster_1716	6.59404	1.69906e-08
Cluster_1719	-6.22764	0.000758009
Cluster_1726	18.0778	6.1643e-19
Cluster_1735	-7.55441	0.0106473
Cluster_1747	5.68152	0.00157841
Cluster_1757	-11.5662	0.00681638
Cluster_1758	12.1702	0.000290876
Cluster_1761	5.73972	2.42126e-13
Cluster_1762	5.88414	1.05869e-10
Cluster_1778	-8.89297	1.09293e-08
Cluster_1786	5.21445	7.58474e-12
Cluster_1788	-8.19773	5.5806e-08
Cluster_1791	6.28774	3.79535e-07
Cluster_1795	5.40579	1.23218e-07
Cluster_1796	7.33011	9.1834e-08
Cluster_1800	5.72981	2.61847e-11
Cluster_1801	5.44751	0.019681
Cluster_1802	-15.625	0.000237774
Cluster_1803	-6.12446	1.09002e-05
Cluster_1811	6.40518	0.00718313
Cluster_1826	-5.36582	0.000225493
Cluster_1828	-6.47317	0.0254039
Cluster_1838	14.2297	3.001e-05
Cluster_1851	-9.73705	2.71133e-13
Cluster_1853	8.39377	6.82621e-06
Cluster_1877	-9.63058	0.00136286
Cluster_1878	-5.64003	3.90881e-17
Cluster_1900	35.3383	0.0301631
Cluster_1904	-5.01992	0.000191448
Cluster_1913	5.5424	0.00224937
Cluster_1914	-5.99028	0.0159184
Cluster_1931	-9.61026	3.3352e-05
Cluster_1937	6.65666	0.0123488
Cluster_1940	-8.23395	1.93827e-29
Cluster_1943	-12.0753	1.62794e-07
Cluster_1948	-6.3262	3.44389e-05
Cluster_1949	13.4245	2.06852e-17
Cluster_1951	5.07282	1.46744e-07
Cluster_1954	6.15719	1.4211e-07
Cluster_1975	14.64	3.94942e-28
Cluster_1980	-27.1682	0.00185746
Cluster_1992	6.27649	2.77724e-06
Cluster_1998	-9.52789	1.33114e-10
Cluster_2004	9.69189	2.23418e-11
Cluster_2011	6.21747	1.55413e-17
Cluster_2013	7.27771	0.000245333
Cluster_2016	-7.5286	0.000385174
Cluster_2019	-6.16862	3.07448e-10
Cluster_2027	-46.6474	3.56871e-10
Cluster_2031	5.33326	1.33584e-08
Cluster_2032	-6.33503	0.00040504
Cluster_2034	5.09753	5.00131e-08
Cluster_2038	-7.52712	1.81031e-13
Cluster_2049	-13.2048	4.50606e-74
Cluster_2053	9.99992	5.21152e-10
Cluster_2056	6.8912	2.00864e-10
Cluster_2067	5.85288	0.00562338
Cluster_2068	8.75459	5.18276e-10
Cluster_2069	-5.36326	0.00297628
Cluster_2077	35.5311	7.75522e-20
Cluster_2080	6.37079	4.6911e-09
Cluster_2082	-11.3605	3.94035e-17
Cluster_2084	-20.8821	3.72307e-53
Cluster_2087	-5.02342	5.12785e-09
Cluster_2090	-15.8272	0.000556501
Cluster_2094	-6.11238	6.91944e-10
Cluster_2098	-13.8556	3.04221e-08
Cluster_2100	-11.1299	4.94425e-11
Cluster_2106	6.24736	1.40741e-07
Cluster_2107	-6.59021	6.35088e-05
Cluster_2111	7.51211	0.0127701
Cluster_2112	9.83954	1.64072e-05
Cluster_2121	9.39672	1.54919e-07
Cluster_2129	9.02803	2.57578e-11
Cluster_2148	5.63777	0.000267562
Cluster_2149	-5.10743	1.55958e-05
Cluster_2156	-5.19267	8.01256e-07
Cluster_2159	-7.25749	9.68944e-11
Cluster_2160	8.70983	0.0228289
Cluster_2162	-8.82563	3.52332e-10
Cluster_2171	-5.58321	1.99555e-07
Cluster_2173	-24.4068	2.08622e-52
Cluster_2178	25.1939	7.28734e-70
Cluster_2184	6.78084	1.54301e-06
Cluster_2191	5.18635	1.71957e-06
Cluster_2192	14.614	4.50194e-41
Cluster_2198	10.8309	5.67929e-21
Cluster_2209	-5.03944	5.31129e-06
Cluster_2211	5.7417	0.0010511
Cluster_2225	-6.74139	0.000239168
Cluster_2232	9.93978	0.00147702
Cluster_2235	-5.18868	0.0247116
Cluster_2242	5.12117	9.49992e-14
Cluster_2249	-7.87286	5.34009e-22
Cluster_2252	6.04683	5.20087e-08
Cluster_2267	7.16217	3.82574e-09
Cluster_2269	-20.8813	6.83306e-23
Cluster_2287	7.92063	8.87959e-06
Cluster_2290	8.84308	1.22107e-26
Cluster_2295	-5.47543	0.00945772
Cluster_2300	23.0284	2.23599e-42
Cluster_2308	-7.11516	0.000276711
Cluster_2317	-5.036	0.0131769
Cluster_2320	9.00899	1.84824e-05
Cluster_2323	-18.7726	2.67538e-23
Cluster_2343	7.04008	2.45498e-08
Cluster_2359	14.7238	8.06775e-12
Cluster_2362	5.72428	0.00226099
Cluster_2370	5.24937	8.38305e-08
Cluster_2374	-5.429	0.0415082
Cluster_2377	-11.3855	1.85706e-16
Cluster_2380	5.28801	4.16916e-05
Cluster_2382	-5.70818	8.45305e-05
Cluster_2386	-5.94369	0.00267503
Cluster_2388	-8.73434	6.17537e-12
Cluster_2402	-5.80825	0.0172646
Cluster_2405	7.72677	5.37012e-23
Cluster_2408	5.17012	1.75894e-06
Cluster_2411	-6.4295	9.47268e-10
Cluster_2416	-17.652	0.00364008
Cluster_2431	-11.8665	1.38256e-08
Cluster_2433	-11.9887	0.0023283
Cluster_2436	8.30702	4.67303e-05
Cluster_2439	5.07991	3.65417e-09
Cluster_2444	-22.5077	7.37825e-36
Cluster_2446	-5.11031	7.71947e-08
Cluster_2452	5.1936	0.00618723
Cluster_2456	5.20718	3.19295e-10
Cluster_2462	5.50635	2.50471e-10
Cluster_2468	28.3629	3.38474e-09
Cluster_2471	-5.42513	0.0117916
Cluster_2479	7.75415	1.14898e-07
Cluster_2483	13.4873	1.90423e-10
Cluster_2502	5.55193	7.64552e-08
Cluster_2509	-5.14352	1.46958e-05
Cluster_2511	-14.8662	3.21338e-06
Cluster_2518	-5.76405	0.0201172
Cluster_2519	9.01758	0.0200749
Cluster_2522	5.39688	1.29201e-08
Cluster_2525	8.93529	1.04174e-24
Cluster_2527	5.96127	3.71626e-13
Cluster_2533	-10.0478	5.7098e-34
Cluster_2534	13.0865	1.3547e-09
Cluster_2540	-5.54387	5.90017e-06
Cluster_2543	6.29323	0.00971101
Cluster_2556	-7.24287	1.24861e-07
Cluster_2559	-5.2094	7.18065e-09
Cluster_2572	-24.6502	2.38164e-34
Cluster_2579	-6.87185	0.00290991
Cluster_2582	-10.7146	1.83943e-14
Cluster_2584	-6.8274	0.00596302
Cluster_2588	-15.8567	2.77409e-10
Cluster_2592	6.28595	2.43211e-06
Cluster_2598	-6.49347	1.22215e-11
Cluster_2600	12.2362	9.97615e-05
Cluster_2610	-19.0693	0.000106599
Cluster_2616	8.3993	0.0169575
Cluster_2640	5.60846	2.29489e-13
Cluster_2650	7.3227	2.23478e-20
Cluster_2667	9.09091	0.0304537
Cluster_2682	-7.39865	0.00035936
Cluster_2684	-6.14056	0.000208782
Cluster_2687	-5.23429	0.000792565
Cluster_2689	7.50516	1.56017e-17
Cluster_2692	6.20866	2.14423e-10
Cluster_2695	5.51732	9.19737e-18
Cluster_2718	-9.46001	0.000199928
Cluster_2720	15.1289	1.61505e-09
Cluster_2723	48.3741	1.14013e-19
Cluster_2726	6.66105	3.41815e-08
Cluster_2733	13.4093	0.00553407
Cluster_2747	-43.3604	5.43922e-05
Cluster_2760	6.49638	6.21966e-09
Cluster_2761	5.01124	6.9711e-06
Cluster_2763	5.25778	0.000222308
Cluster_2777	22.3508	1.48331e-23
Cluster_2779	23.0763	9.63158e-05
Cluster_2781	14.8793	0.000191524
Cluster_2782	6.76031	4.81089e-14
Cluster_2783	17.2176	7.25505e-11
Cluster_2784	-5.64987	1.04697e-10
Cluster_2788	7.3459	9.84308e-05
Cluster_2793	8.04485	0.000257957
Cluster_2796	11.5385	0.00872276
Cluster_2823	-12.7552	1.15425e-13
Cluster_2824	-21.7658	9.23648e-08
Cluster_2826	5.07228	4.36407e-05
Cluster_2828	-8.78615	0.000172469
Cluster_2831	7.97472	6.43447e-06
Cluster_2858	63.9757	8.02056e-79
Cluster_2872	6.047	2.13527e-06
Cluster_2873	6.32989	6.78521e-05
Cluster_2879	7.91067	4.24128e-10
Cluster_2880	5.92267	0.0020055
Cluster_2888	-11.6482	8.47321e-12
Cluster_2897	5.23452	2.53244e-05
Cluster_2901	6.64348	7.41109e-17
Cluster_2903	10.4487	1.53098e-06
Cluster_2909	12.1446	1.69202e-10
Cluster_2910	-61.4556	1.45423e-14
Cluster_2913	-5.25771	0.00525735
Cluster_2930	9.68964	0.022955
Cluster_2958	-6.05188	1.59864e-28
Cluster_2982	9.4802	7.68258e-05
Cluster_2993	-10.4888	1.64618e-08
Cluster_3011	7.02619	1.09666e-07
Cluster_3014	-6.02601	4.94898e-06
Cluster_3023	6.69934	1.73193e-16
Cluster_3027	18.6018	4.77712e-32
Cluster_3030	-27.2917	0.000436904
Cluster_3041	-9.15979	6.30884e-09
Cluster_3074	-7.31618	0.000619253
Cluster_3075	-5.14895	0.00212935
Cluster_3076	-11.1402	4.03192e-07
Cluster_3096	-9.74232	9.76616e-07
Cluster_3100	8.52072	4.82024e-06
Cluster_3103	15.2845	5.53655e-36
Cluster_3108	-13.3535	0.000532822
Cluster_3109	-6.57768	1.1077e-05
Cluster_3116	-59.3886	0.000318534
Cluster_3123	-6.60971	0.016803
Cluster_3124	13.7657	0.00217888
Cluster_3125	6.22692	1.69057e-11
Cluster_3127	6.20571	1.84038e-10
Cluster_3128	9.90442	2.40815e-15
Cluster_3133	6.33754	2.81761e-11
Cluster_3140	-6.42457	0.00473186
Cluster_3148	8.80698	2.80839e-06
Cluster_3154	-38.1907	3.87508e-42
Cluster_3156	-9.34882	0.0155114
Cluster_3159	6.95377	8.58572e-09
Cluster_3169	7.51702	3.84135e-05
Cluster_3178	-14.3691	7.91032e-08
Cluster_3193	6.40351	0.0045476
Cluster_3211	-9.35439	1.74413e-15
Cluster_3213	5.27473	0.0222519
Cluster_3223	5.41419	0.0118839
Cluster_3231	5.18576	1.61773e-08
Cluster_3237	9.30713	4.20177e-10
Cluster_3238	-11.5926	9.46045e-12
Cluster_3239	-5.23573	0.000144658
Cluster_3255	50	2.49312e-07
Cluster_3258	9.22947	0.000803254
Cluster_3274	-8.05428	1.41721e-06
Cluster_3298	9.7508	2.23724e-11
Cluster_3304	-5.49467	0.000183
Cluster_3306	7.69668	6.94719e-05
Cluster_3308	22.5674	2.17586e-10
Cluster_3309	-9.75375	1.82114e-08
Cluster_3314	8.08701	0.000270441
Cluster_3319	8.67662	0.000815577
Cluster_3322	-7.66741	4.89805e-15
Cluster_3323	-7.88283	4.83722e-20
Cluster_3329	-10.2992	4.07518e-08
Cluster_3335	8.03671	0.000429834
Cluster_3357	7.45961	1.79459e-09
Cluster_3369	5.04541	1.18122e-14
Cluster_3395	-9.33109	0.00137669
Cluster_3403	7.57383	1.70996e-05
Cluster_3414	42.8905	5.16755e-57
Cluster_3436	13.1036	5.81175e-16
Cluster_3437	5.04681	3.7314e-07
Cluster_3445	-14.2645	8.58159e-06
Cluster_3448	-6.03834	1.33083e-22
Cluster_3450	-5.12122	0.00740145
Cluster_3455	11.3929	8.64602e-06
Cluster_3458	7.69635	0.014246
Cluster_3475	7.52671	0.000198426
Cluster_3481	19.1111	0.00254013
Cluster_3495	-5.56848	0.000885187
Cluster_3501	12.5041	1.38362e-10
Cluster_3502	-5.10459	0.0216923
Cluster_3515	7.82466	6.77061e-09
Cluster_3534	7.14953	0.00076457
Cluster_3536	7.21333	0.000107195
Cluster_3538	12.4382	5.35619e-08
Cluster_3540	18.0221	3.38066e-07
Cluster_3552	7.22564	2.26024e-07
Cluster_3560	6.54291	0.000108062
Cluster_3572	-12.1475	5.56362e-09
Cluster_3579	5.62216	1.91362e-05
Cluster_3587	7.76975	6.69166e-09
Cluster_3588	6.9513	4.09109e-05
Cluster_3596	-5.33574	0.00109876
Cluster_3598	-11.448	2.11245e-21
Cluster_3601	-11.3453	4.57539e-09
Cluster_3619	6.76648	0.00075595
Cluster_3623	-5.18084	9.82169e-07
Cluster_3655	17.0785	5.48172e-12
Cluster_3678	-40	0.0235253
Cluster_3684	-5.03101	0.000161818
Cluster_3690	-6.84774	2.80805e-05
Cluster_3691	-14.1216	3.21671e-05
Cluster_3698	-9.01319	7.93722e-06
Cluster_3699	-7.19253	5.72477e-09
Cluster_3709	5.2535	5.88373e-06
Cluster_3715	5.46464	0.0397883
Cluster_3717	-8.15765	0.000541096
Cluster_3734	-11.9186	4.48646e-08
Cluster_3740	5.593	2.68307e-10
Cluster_3755	-11.1081	1.99476e-10
Cluster_3763	-5.69717	4.6323e-16
Cluster_3772	-5.72304	2.9364e-06
Cluster_3774	5.10017	2.03956e-11
Cluster_3776	-18.5345	3.46214e-31
Cluster_3787	7.72209	2.2899e-07
Cluster_3792	9.31405	6.26503e-07
Cluster_3798	-5.06808	0.00216863
Cluster_3807	9.21531	5.97335e-11
Cluster_3811	26.8325	3.99878e-05
Cluster_3812	7.20989	1.75529e-14
Cluster_3822	7.94301	2.54108e-05
Cluster_3824	-14.2827	1.18701e-05
Cluster_3825	-6.19609	2.35842e-06
Cluster_3826	47.6821	0.00322709
Cluster_3828	10.0734	3.27107e-22
Cluster_3835	5.30098	1.46452e-06
Cluster_3838	-22.4396	1.8199e-07
Cluster_3846	-16.8293	0.00680014
Cluster_3850	-7.61312	0.0292662
Cluster_3851	6.23388	4.76903e-05
Cluster_3858	26.9001	8.75492e-05
Cluster_3865	7.77647	0.00014906
Cluster_3866	-8.70035	0.0112917
Cluster_3871	7.22689	3.51229e-07
Cluster_3879	10.3648	3.30275e-21
Cluster_3881	7.73768	0.0430487
Cluster_3883	6.38368	8.63296e-06
Cluster_3886	10.0085	5.17765e-12
Cluster_3887	-13.5256	1.68782e-63
Cluster_3890	5.08058	9.69073e-07
Cluster_3897	9.17941	8.8899e-12
Cluster_3900	5.50907	0.0344156
Cluster_3902	17.8502	0.0343187
Cluster_3903	7.87506	7.846e-05
Cluster_3907	-6.98003	0.00885947
Cluster_3911	-8.5364	9.13198e-09
Cluster_3915	17.3707	0.000379203
Cluster_3916	17.0736	8.62504e-05
Cluster_3922	-6.02079	0.000169174
Cluster_3924	-10.9254	0.00692791
Cluster_3925	5.52146	0.00279305
Cluster_3926	6.08755	2.31965e-07
Cluster_3952	-6.18169	0.0184522
Cluster_3953	6.55556	1.29139e-13
Cluster_3954	5.67972	1.314e-06
Cluster_3974	-8.77922	6.84487e-17
Cluster_3999	8.49341	0.000120398
Cluster_4000	-11.7802	5.53528e-49
Cluster_4001	8.73477	0.0443584
Cluster_4009	7.2318	0.00413168
Cluster_4012	-11.7897	9.53018e-14
Cluster_4014	-7.20757	0.000261829
Cluster_4015	5.30861	0
Cluster_4018	-13.945	2.32083e-05
Cluster_4021	6.09297	9.00118e-06
Cluster_4028	-6.30119	0.000993237
Cluster_4033	6.62132	2.25579e-05
Cluster_4039	-9.34325	5.4729e-11
Cluster_4040	15.9544	0.000778881
Cluster_4042	8.29806	0.00246539
Cluster_4044	-12.6607	3.19951e-11
Cluster_4046	17.0549	9.71643e-11
Cluster_4049	-6.42869	7.54003e-05
Cluster_4053	28.5953	0.00392567
Cluster_4063	-25.6356	1.37595e-17
Cluster_4072	8.63829	0.0150734
Cluster_4074	5.52864	1.0175e-16
Cluster_4076	8.95214	4.8649e-06
Cluster_4077	7.0594	1.1222e-09
[truncated: 4,697 more rows]

[truncated: 5 more sheets: 4J, 4K_DEGs_clust_PHYAvsWT_IG, 4L_DEGs_clust_PHYB1B2vsWT_IG, 4M_DEGs_clust_PHYAvsWT_BK, 4N_DEGs_clust_PHYB1B2vsWT_BK]
