# Supplementary material for: Phytochrome-Mediated Light Perception Affects Fruit Development and Ripening Through Epigenetic Mechanisms
Source: Front Plant Sci. 2022 Apr 28;13:870974. doi: 10.3389/fpls.2022.870974 (PMC9096621; doi:10.3389/fpls.2022.870974)
Supplement: Supplementary file 3 [file Data_Sheet_3.XLSX]

## Sheet: WT-IG_vs_PHYA-IG
Supplementary Table 5. DEGs in phyA and phyB1B1 mutants at IG and BK stages. Up- and down-regulated genes in the mutants compared to WT are highlighted in red and blue, respectively.
Gene	logFC	logCPM	PValue	padj	Description	GO_Term	GO_name	MapMan_bin	MapMan_name	NCBI	A._thaliana_ortholog
Solyc09g016950	12.6725	4.00641	1.19298e-57	4.26706e-53	Concanavalin A-like lectin protein kinase family protein			35.2	not assigned.not annotated	XP_019071253.1
Solyc12g035225	12.3739	2.6285	2.27805e-35	2.03704e-31	BED zinc finger,hAT family dimerization domain, putative	GO:0046983	protein dimerization activity	15.5	RNA biosynthesis.transcriptional regulation	XP_010314162.1
Solyc12g049030	11.5969	3.12213	0.0001496	0.0251216	Fatty acid desaturase	GO:0016717|GO:0055114	oxidoreductase activity, acting on paired donors, with oxidation of a pair of donors resulting in the reduction of molecular oxygen to two molecules of water | oxidation-reduction process	5.1.7.3	Lipid metabolism.fatty acid biosynthesis.fatty acid desaturation.omega-3/omega-6 fatty acid desaturase (FAD2/3/6-8)	XP_004252384.1	AT3G12120.1
Solyc09g030360	11.4659	2.67105	1.29162e-32	7.6998e-29	LOW QUALITY:Thiamine biosynthetic bifunctional enzyme TH1, chloroplastic			35.2	not assigned.not annotated	XP_010326791.1
Solyc09g042785	10.7874	2.57793	1.57082e-29	7.02312e-26	DNA gyrase subunit A, chloroplastic/mitochondrial			35.2	not assigned.not annotated	XP_004232503.1
Solyc09g055550	10.7316	2.31598	9.89127e-20	2.21119e-16	RING/FYVE/PHD zinc finger superfamily protein			35.2	not assigned.not annotated	XP_004238401.1
Solyc09g018960	10.7122	1.7666	1.92792e-12	2.08964e-09	Chaperone DnaJ-domain superfamily protein			35.1	not assigned.annotated	XP_010325724.1
Solyc09g015700	10.6324	2.34864	2.23551e-15	3.33165e-12	Replication factor C subunit 3			35.2	not assigned.not annotated	XP_004250824.1
Solyc12g035223	10.5541	0.668115	1.15602e-18	2.29714e-15	Cytochrome b561 and DOMON domain-containing protein At5g35735			2.4.1	Cellular respiration.oxidative phosphorylation.NADH dehydrogenase complex	XP_004237881.1
Solyc02g070110	10.5271	0.897886	0.000118742	0.0216693	FAD-binding Berberine family protein	GO:0050660	flavin adenine dinucleotide binding	50.1.1 | 10	Enzyme classification.EC_1 oxidoreductases.EC_1.1 oxidoreductase acting on CH-OH group of donor | Redox homeostasis	XP_004233882.2	AT5G44440.1
Solyc01g009810	10.4758	0.898053	9.10703e-05	0.0179733	Leucine-rich repeat receptor-like kinase protein	GO:0005515	protein binding	27	Multi-process regulation	XP_004228437.1
Solyc09g059250	10.4716	1.85248	1.24333e-25	3.70595e-22	global transcription factor group E4			35.2	not assigned.not annotated	XP_010322376.1
Solyc09g048970	10.3961	1.39875	9.4399e-22	2.41176e-18	DNA-directed RNA polymerase II subunit RPB7			15.1.6.5	RNA biosynthesis.DNA-dependent RNA polymerase (Pol) complexes.Pol I-V shared regulatory components.subunit 7	XP_004235838.1
Solyc09g018840	10.3444	1.78803	9.34278e-21	2.22782e-17	MLO-like protein	GO:0006952|GO:0016021	defense response | integral component of membrane	35.1	not assigned.annotated	NP_001335375.1
Solyc09g059260	9.88148	2.64991	1.8574e-36	2.21452e-32	CBL-interacting protein kinase 3			35.2	not assigned.not annotated	XP_010318313.1
Solyc09g098080	9.84282	0.717231	0.000235581	0.0366359	Glycosyltransferase	GO:0008152|GO:0016758	metabolic process | transferase activity, transferring hexosyl groups	50.2.4	Enzyme classification.EC_2 transferases.EC_2.4 glycosyltransferase	XP_004248013.1
Solyc09g015457	9.68198	1.11733	6.8838e-17	1.17248e-13	P-loop containing nucleoside triphosphate hydrolases superfamily protein			35.2	not assigned.not annotated	XP_019070520.1
Solyc07g026710	9.64444	0.806031	4.56901e-17	8.17121e-14	Transposon protein, putative, Mutator sub-class			35.2	not assigned.not annotated	XP_025886080.1
Solyc11g017373	9.62293	-0.153897	5.87287e-15	8.07927e-12	Serine/threonine protein phosphatase 7 long form isogeny			18.4	Protein modification.phosphorylation	XP_025887697.1
Solyc10g005120	8.72583	3.22424	1.56982e-34	1.12299e-30	2-oxoglutarate (2OG) and Fe(II)-dependent oxygenase superfamily protein	GO:0016491|GO:0055114	oxidoreductase activity | oxidation-reduction process	7.12.4.2.1	Coenzyme metabolism.tetrapyrrol biosynthesis.protoporphyrin IX formation.coproporphyrinogen III oxidase activities.oxygen-dependent coproporphyrinogen III oxidase (HemF)	XP_004248411.1
Solyc10g079570	8.71878	4.38628	4.22549e-10	3.59851e-07	HXXXD-type acyl-transferase family protein	GO:0016747	transferase activity, transferring acyl groups other than amino-acyl groups	35.1	not assigned.annotated	XP_025883713.1
Solyc09g030420	8.70565	-0.145077	3.69392e-10	3.30311e-07	auxin response factor, putative (DUF688)			35.2	not assigned.not annotated	NP_001307785.1
Solyc01g109010	8.62249	-0.834748	0.000239267	0.0370481	Sorting nexin-16			35.2	not assigned.not annotated	XP_025884400.1
Solyc09g056010	8.26644	0.342633	5.10724e-10	4.15172e-07	LOW QUALITY:ACT-like protein tyrosine kinase family protein			35.2	not assigned.not annotated	XP_004246939.1
Solyc09g056200	8.26527	3.52426	8.37883e-32	4.28134e-28	F-box/RNI-like/FBD-like domains-containing protein			35.2	not assigned.not annotated	XP_010325520.1
Solyc10g075150	8.15981	6.62904	1.17309e-06	0.000499513	Non-specific lipid-transfer protein	GO:0006869|GO:0008289	lipid transport | lipid binding	35.1	not assigned.annotated	XP_004249051.1
Solyc09g015680	8.09358	0.10661	1.33065e-09	9.91555e-07	LOW QUALITY:Aquaporin TIP3-2			35.2	not assigned.not annotated	XP_010313237.1
Solyc09g018955	8.019	4.92	6.23603e-52	1.11525e-47	DnaJ domain protein			22.1.6.4	Vesicle trafficking.clathrin coated vesicle (CCV) machinery.CCV accessory factors.clathrin uncoating protein (AUL)	XP_010325724.1
Solyc10g079860	7.86659	4.87018	2.9095e-06	0.00106191	LEQB L.esculentum TomQ'b beta(1,3)glucanase	GO:0005975	carbohydrate metabolic process	50.3.2	Enzyme classification.EC_3 hydrolases.EC_3.2 glycosylase	NP_001234158.2
Solyc12g100260	7.74999	3.59491	0.000248138	0.0376076	Fatty acid desaturase			5.1.7.3	Lipid metabolism.fatty acid biosynthesis.fatty acid desaturation.omega-3/omega-6 fatty acid desaturase (FAD2/3/6-8)	XP_019067122.1	AT3G12120.1
Solyc03g078490	7.74127	-0.0552641	0.000174111	0.0284365	Glycosyltransferase	GO:0008152|GO:0016758	metabolic process | transferase activity, transferring hexosyl groups	50.2.4	Enzyme classification.EC_2 transferases.EC_2.4 glycosyltransferase	XP_004235065.1
Solyc01g108975	7.65084	-1.53468	0.000132071	0.0234993	Germacrene A oxidase			15.5.46	RNA biosynthesis.transcriptional regulation.transcription factor (FAR1)	XP_025884759.1
Solyc02g022900	7.62983	-0.924666	1.68104e-06	0.000683268	fatty acid hydroxylase 2			35.2	not assigned.not annotated	XP_004233153.1
Solyc07g039440	7.55634	-0.516583	2.4308e-06	0.000905674	LOW QUALITY:Disease resistance protein	GO:0043531	ADP binding	35.1	not assigned.annotated	XP_010319324.1	AT3G46530.1
Solyc08g081350	7.5526	-0.792094	1.11473e-05	0.00325273	LOW QUALITY:Zinc finger protein CONSTANS-LIKE 3	GO:0005515	protein binding	35.2	not assigned.not annotated	XP_004245581.1	AT1G63820.1
Solyc09g060070	7.44402	-1.26283	8.31335e-06	0.00258944	RAP release 2, galactose-binding-like domain protein, putative (DUF1997)			16.6.3.4	RNA processing.tRNA modification.pseudouridylation.dual-specificity tRNA/rRNA pseudouridine synthase (RluA)	XP_004252515.1
Solyc09g056040	7.27473	-0.911425	6.35333e-05	0.0139048	E3 ubiquitin-protein ligase UPL5-like protein	GO:0004842	ubiquitin-protein transferase activity	19.2.2.1.5.1.1	Protein homeostasis.ubiquitin-proteasome system.ubiquitin-fold protein conjugation.ubiquitin conjugation (ubiquitylation).ubiquitin-ligase E3 activities.HECT-type E3 ligase activities.monomeric E3 ubiquitin ligase (HECT)	XP_004246939.1
Solyc03g059435	7.21903	-2.07436	0.000196535	0.0315232	Serine/threonine protein phosphatase 7 long form isogeny			18.4	Protein modification.phosphorylation	XP_019069006.1
Solyc09g031523	7.20046	-0.44284	9.25697e-08	5.17349e-05	P-loop containing nucleoside triphosphate hydrolases superfamily protein			35.2	not assigned.not annotated	XP_010320708.1
Solyc09g042230	7.19669	-0.042995	1.09777e-05	0.00324505	LOW QUALITY:AIG2-like (avirulence induced gene) family protein			35.2	not assigned.not annotated	XP_004245532.1
Solyc09g031875	7.11887	-1.43917	0.000335189	0.0470158	Cytochrome P450	GO:0005506|GO:0016705|GO:0020037|GO:0055114	iron ion binding | oxidoreductase activity, acting on paired donors, with incorporation or reduction of molecular oxygen | heme binding | oxidation-reduction process	35.1	not assigned.annotated	XP_004242874.1
Solyc05g023990	7.07138	-1.96632	3.8575e-05	0.00938606	LOW QUALITY:Leucine-rich receptor-like protein kinase family protein			35.2	not assigned.not annotated	XP_004238042.1
Solyc11g020320	7.04182	-0.565266	8.84159e-06	0.00272626	LOW QUALITY:MADS-box transcription factor family protein	GO:0003677|GO:0046983	DNA binding | protein dimerization activity	15.5.14	RNA biosynthesis.transcriptional regulation.transcription factor (MADS/AGL)	XP_019066449.1	AT5G55690.1
Solyc07g052040	7.03727	-1.79634	0.000169487	0.0278083	Tubulin beta chain	GO:0005874|GO:0007017	microtubule | microtubule-based process	35.2	not assigned.not annotated	XP_004249594.1
Solyc09g056270	7.02937	2.37857	1.42085e-27	4.6201e-24	Chlorophyllide a oxygenase, chloroplastic			35.1	not assigned.annotated	XP_004250311.1
Solyc07g052100	7.02717	0.171064	1.04246e-06	0.000460228	SNF2 domain-containing protein	GO:0046872	metal ion binding	12.4.1.5.2	Chromatin organisation.chromatin remodeling complexes.ATPase modules.Rad5/16-like group.chromatin remodeling factor (Rad5-like)	XP_010323837.1
Solyc08g078450	6.85939	1.35045	6.44911e-05	0.0139048	Exostosin family protein			35.1	not assigned.annotated	XP_025888194.1
Solyc08g068870	6.77718	2.89883	0.000148856	0.0251146	aspartate protease family protein	GO:0004190|GO:0006508	aspartic-type endopeptidase activity | proteolysis	19.4.3.1	Protein homeostasis.proteolysis.aspartic-type peptidase activities.A1-class protease (Pepsin)	NP_001316135.1
Solyc03g122130	6.71228	1.24728	3.518e-06	0.00125832	Peroxisomal (S)-2-hydroxy-acid oxidase	GO:0016491|GO:0055114	oxidoreductase activity | oxidation-reduction process	50.1.1	Enzyme classification.EC_1 oxidoreductases.EC_1.1 oxidoreductase acting on CH-OH group of donor	XP_004235561.1
Solyc09g061790	6.67573	-0.486414	1.9017e-09	1.3604e-06	LOW QUALITY:Pentatricopeptide repeat-containing protein, putative			35.1	not assigned.annotated	XP_004247300.1	AT2G17525.1
Solyc01g058595	6.66991	-2.40495	2.11711e-05	0.00565112	LOW QUALITY:Polyprotein, putative	GO:0046983	protein dimerization activity	35.2	not assigned.not annotated	XP_010318584.1
Solyc03g059460	6.66021	-2.08385	5.81878e-05	0.0130897	Serine/threonine protein phosphatase 7 long form isogeny			18.4	Protein modification.phosphorylation	XP_025887697.1	AT1G48120.1
Solyc01g044480	6.64798	-1.63033	0.00010142	0.0191936	Elongation factor P	GO:0003746|GO:0006414	translation elongation factor activity | translational elongation	17.7.4.4	Protein biosynthesis.organelle machinery.translation elongation.elongation factor (EF-P)	XP_004228965.1
Solyc09g014860	6.61722	-0.180923	3.77272e-06	0.00132297	LURP-one-like protein			35.1	not assigned.annotated	XP_004246313.1
Solyc08g005630	6.39472	8.80712	1.29312e-13	1.5949e-10	Long-chain-alcohol oxidase	GO:0046577|GO:0055114	long-chain-alcohol oxidase activity | oxidation-reduction process	27	Multi-process regulation	NP_001317921.1
Solyc09g014740	6.10227	-0.99517	4.98488e-08	2.97999e-05	Kinase, putative	GO:0030247	polysaccharide binding	18.4.1.25	Protein modification.phosphorylation.TKL protein kinase superfamily.protein kinase (WAK/WAKL)	XP_010325784.1
Solyc03g098740	6.05206	4.889	1.70193e-06	0.000683983	Kunitz trypsin inhibitor	GO:0004866	endopeptidase inhibitor activity	35.2	not assigned.not annotated	XP_004235492.2	AT1G17860.1
Solyc09g031520	6.0135	-1.80566	0.000195901	0.0315232	LOW QUALITY:Phosphoglycerate mutase family protein			35.2	not assigned.not annotated
Solyc09g059400	5.97037	1.6217	3.45145e-15	4.93807e-12	CCCH-type zinc fingerfamily protein with RNA-binding domain-containing protein			35.2	not assigned.not annotated	XP_019071232.1
Solyc01g111900	5.94362	-1.24438	2.97378e-05	0.00759758	O-methyltransferase, putative	GO:0046983	protein dimerization activity	50.2.1 | 5.5.1.1	Enzyme classification.EC_2 transferases.EC_2.1 transferase transferring one-carbon group | Lipid metabolism.phytosterol biosynthesis.campesterol.sterol C-24 methyltransferase	XP_004231071.1
Solyc08g062220	5.94255	3.1338	1.27567e-08	8.29606e-06	Glycosyltransferase	GO:0008152|GO:0016758	metabolic process | transferase activity, transferring hexosyl groups	11.8.3.3	Phytohormone action.salicylic acid.conjugation and degradation.UDP-dependent glycosyl transferase	XP_004245060.1
Solyc01g097240	5.82331	7.30032	0.000125581	0.022459	Pathogenesis-related protein PR-4	GO:0042742|GO:0050832	defense response to bacterium | defense response to fungus	26.8	External stimuli response.pathogen	NP_001234083.1
Solyc09g011590	5.61227	4.8038	0.000284451	0.0415275	Glutathione S-transferase-like protein	GO:0005515	protein binding	18.8.1.4	Protein modification.S-glutathionylation.glutathione S-transferase activities.class tau glutathione S-transferase	XP_004246381.1
Solyc08g007460	5.51894	4.80439	0.000162746	0.0269496	Lipid transfer protein			35.2	not assigned.not annotated	XP_004244575.1	AT1G62790.1
Solyc01g014390	5.34939	0.4447	7.84549e-11	7.79493e-08	DNA-directed RNA polymerase subunit beta''			15.1	RNA biosynthesis.DNA-dependent RNA polymerase (Pol) complexes	XP_004238280.1
Solyc09g008720	5.19219	3.29215	8.30346e-18	1.56315e-14	Exostosin-like protein			21.3.4.1.1	Cell wall organisation.pectin.xylogalacturonan.biosynthesis.xylogalacturonan xylosyltransferase	XP_010325948.1
Solyc00g060810	5.17765	7.62728	7.0793e-06	0.00228119	Sn-1 protein	GO:0006952|GO:0009607	defense response | response to biotic stimulus	35.1	not assigned.annotated	XP_004253390.1
Solyc08g079900	5.05517	3.73654	0.000222256	0.0350205	subtilisin-like protease	GO:0004252|GO:0006508	serine-type endopeptidase activity | proteolysis	19.4.2.1	Protein homeostasis.proteolysis.serine-type peptidase activities.S8-class protease (subtilisin) families	XP_019070934.1
Solyc09g092300	5.01339	1.56378	2.06564e-13	2.4628e-10	Ph-3 resistance protein	GO:0043531	ADP binding	35.1	not assigned.annotated	XP_004247880.1
Solyc03g095900	4.96553	10.4677	2.61618e-14	3.46576e-11	E8 protein homolog	GO:0016491|GO:0055114	oxidoreductase activity | oxidation-reduction process	50.1.13	Enzyme classification.EC_1 oxidoreductases.EC_1.14 oxidoreductase acting on paired donor with incorporation or reduction of molecular oxygen	NP_001233961.2
Solyc06g059720	4.86168	3.69572	9.14544e-05	0.0179733	Acyl-[acyl-carrier-protein] desaturase	GO:0016491|GO:0055114	oxidoreductase activity | oxidation-reduction process	5.1.7.1	Lipid metabolism.fatty acid biosynthesis.fatty acid desaturation.stearoyl-ACP desaturase	XP_004242060.1
Solyc02g084037	4.75541	-0.286793	3.45079e-05	0.00863257	stress response NST1-like protein			26.8	External stimuli response.pathogen	XP_025885257.1
Solyc07g056510	4.53249	6.01151	1.61863e-05	0.00452402	Glutathione S-transferase	GO:0005515	protein binding	18.8.1.4	Protein modification.S-glutathionylation.glutathione S-transferase activities.class tau glutathione S-transferase	XP_004243193.1
Solyc10g078600	4.51436	3.89999	6.51224e-16	1.01274e-12	Inorganic phosphate transporter 1-1			35.1	not assigned.annotated	XP_010314629.1
Solyc09g059650	4.46808	3.75064	8.12736e-14	1.03821e-10	Vacuolar iron transporter family protein			24.2.12.3	Solute transport.carrier-mediated transport.VIT family.iron cation transporter (VTL)	XP_004230639.1
Solyc03g045140	4.42797	2.15272	1.42646e-09	1.04126e-06	Cyclopropane-fatty-acyl-phospholipid synthase	GO:0016491|GO:0055114	oxidoreductase activity | oxidation-reduction process	5.1	Lipid metabolism.fatty acid biosynthesis	XP_004234691.1
Solyc05g041540	4.39832	4.21101	9.2133e-06	0.00279272	Carboxypeptidase	GO:0004185|GO:0006508	serine-type carboxypeptidase activity | proteolysis	19.4.2.2	Protein homeostasis.proteolysis.serine-type peptidase activities.S10-class serine carboxypeptidase (SCPL)	XP_004240167.1
Solyc04g010155	4.39656	0.10771	0.000152054	0.0254144	Pax6			15.5	RNA biosynthesis.transcriptional regulation	XP_019068839.1
Solyc03g117470	4.28792	2.11599	1.3469e-12	1.55406e-09	Calcium-binding EF-hand family protein	GO:0005509	calcium ion binding	35.2	not assigned.not annotated	XP_004236447.1
Solyc02g084890	4.16529	6.12622	1.3483e-10	1.30341e-07	NBS-LRR disease resistance protein NBS50	GO:0043531	ADP binding	26.8	External stimuli response.pathogen	XP_004232433.1
Solyc11g045150	4.14852	2.00598	4.07385e-05	0.0098455	myosin XI D			22	Vesicle trafficking	XP_004242175.1	ATMG00030.1
Solyc01g087950	4.12945	6.00203	1.06005e-07	5.7448e-05	Carboxypeptidase	GO:0004185|GO:0006508	serine-type carboxypeptidase activity | proteolysis	19.4.2.2	Protein homeostasis.proteolysis.serine-type peptidase activities.S10-class serine carboxypeptidase (SCPL)	XP_004229672.1
Solyc03g120560	4.08558	5.32486	8.78833e-28	3.14341e-24	Major facilitator superfamily protein	GO:0005215|GO:0006857|GO:0016020	transporter activity | oligopeptide transport | membrane	24.2.2.9	Solute transport.carrier-mediated transport.MFS superfamily.anion transporter (NRT1/PTR)	XP_004235683.1
Solyc09g015490	4.0689	2.93404	4.21859e-16	6.85866e-13	Phosphoenolpyruvate carboxylase	GO:0006099|GO:0008964|GO:0015977	tricarboxylic acid cycle | phosphoenolpyruvate carboxylase activity | carbon fixation	35.1	not assigned.annotated	XP_004236950.1
Solyc10g048060	4.01986	3.08234	5.50956e-05	0.012552	myosin XI D			35.1	not assigned.annotated	XP_004242175.1	ATMG00030.1
Solyc01g095080	3.93952	8.53518	4.85826e-06	0.00163934	1-aminocyclopropane-1-carboxylic acid synthase-2	GO:0009058|GO:0030170	biosynthetic process | pyridoxal phosphate binding	11.5.1.1	Phytohormone action.ethylene.biosynthesis.1-aminocyclopropane-1-carboxylate (ACC) synthase	NP_001234178.2
Solyc06g036250	3.89695	3.12995	7.36813e-10	5.85652e-07	stress response NST1-like protein			35.2	not assigned.not annotated	XP_010321988.1	AT4G25670.1
Solyc02g031960	3.88804	2.50803	5.29135e-05	0.0121321	Pectate lyase	GO:0030570	pectate lyase activity	35.2	not assigned.not annotated	XP_004231596.1
Solyc02g067790	3.83682	1.80274	0.000247418	0.0376076	High affinity nitrate transporter	GO:0016021|GO:0055085	integral component of membrane | transmembrane transport	24.2.2.10 | 25.1.3.1	Solute transport.carrier-mediated transport.MFS superfamily.nitrate transporter (NRT2) | Nutrient uptake.nitrogen assimilation.nitrate uptake system.nitrate transporter (NRT2)	XP_004233327.2
Solyc08g006470	3.79715	3.94479	0.000119715	0.0217359	Zinc finger protein	GO:0046872	metal ion binding	17.1.2.2.3.2	Protein biosynthesis.ribosome biogenesis.large ribosomal subunit (LSU).LSU processome.60S ribosomal subunit cytoplasmic maturation.maturation factor (REIL)	XP_004244493.1
Solyc07g056700	3.79686	4.07555	2.23051e-06	0.000848733	LOW QUALITY:Armadillo/beta-catenin-like repeat family protein			35.2	not assigned.not annotated	XP_004244272.1
Solyc07g045090	3.78911	5.67495	3.12498e-06	0.00112903	NADP-dependent alkenal double bond reductase P1	GO:0055114	oxidation-reduction process	50.1.3	Enzyme classification.EC_1 oxidoreductases.EC_1.3 oxidoreductase acting on CH-CH group of donor	NP_001309000.1
Solyc07g056170	3.76266	4.42995	3.70516e-05	0.00911571	Subtilisin-like protease family protein	GO:0004252|GO:0006508	serine-type endopeptidase activity | proteolysis	19.4.2.1.5	Protein homeostasis.proteolysis.serine-type peptidase activities.S8-class protease (subtilisin) families.protease (SBT5)	XP_004243217.1
Solyc04g016470	3.75339	6.56721	0.000247059	0.0376076	LEQA L.esculentum TomQ'a beta(1,3)glucanase	GO:0005975	carbohydrate metabolic process	50.3.2 | 21.1.3.1	Enzyme classification.EC_3 hydrolases.EC_3.2 glycosylase | Cell wall organisation.cellulose.cellulose degradation.endo-1,4-beta-glucanase	NP_001234155.2
Solyc01g099850	3.74393	-1.49145	0.000217746	0.0345051	Folate receptor-like protein			35.2	not assigned.not annotated	XP_004230254.1
Solyc05g012020	3.71165	8.99143	1.80112e-07	9.20322e-05	Ripening Inhibitor (RIN) MADS-box transcription factor MADS-MC	GO:0003700|GO:0005634|GO:0006355	DNA-binding transcription factor activity | nucleus | regulation of transcription, DNA-templated	15.5.14	RNA biosynthesis.transcriptional regulation.transcription factor (MADS/AGL)	NP_001234670.1
Solyc06g008050	3.60896	5.30062	9.59424e-07	0.000428958	Flavin-containing monooxygenase	GO:0016491|GO:0055114	oxidoreductase activity | oxidation-reduction process	11.2.1.1.2	Phytohormone action.auxin.biosynthesis.indole-3-pyruvic acid (IPyA) pathway.flavin monooxygenase (YUCCA)	NP_001307429.1
Solyc08g005770	3.59116	9.13936	2.13924e-06	0.000822757	alcohol acyl transferase	GO:0016747	transferase activity, transferring acyl groups other than amino-acyl groups	50.2.3 | 27	Enzyme classification.EC_2 transferases.EC_2.3 acyltransferase | Multi-process regulation	NP_001234496.1
Solyc03g006030	3.53964	2.05945	1.61897e-05	0.00452402	LRR receptor-like kinase	GO:0005524	ATP binding	18.4.1.12	Protein modification.phosphorylation.TKL protein kinase superfamily.protein kinase (LRR-XII)	XP_019068299.1
Solyc09g059280	3.51264	0.768287	1.11275e-07	5.9404e-05	Histone H3	GO:0046982	protein heterodimerization activity	35.1	not assigned.annotated	XP_010324306.1
Solyc09g011110	3.46675	0.875908	3.71299e-05	0.00911571	LOW QUALITY:Zinc finger, C2H2	GO:0046872	metal ion binding	15.5.15	RNA biosynthesis.transcriptional regulation.transcription factor (C2H2-ZF)	XP_004249544.1	AT3G53820.1
Solyc12g096310	3.39234	7.34904	3.6158e-09	2.53588e-06	plant/protein (Protein of unknown function, DUF599)			35.2	not assigned.not annotated	XP_004253068.1
Solyc05g010517	3.35557	0.850733	1.16845e-06	0.000499513	BZip transcription factor	GO:0003700|GO:0006355|GO:0043565	DNA-binding transcription factor activity | regulation of transcription, DNA-templated | sequence-specific DNA binding	15.5.4.1	RNA biosynthesis.transcriptional regulation.bZIP transcription factor superfamily.transcription factor (bZIP)	XP_004239003.1
Solyc09g082460	3.31039	6.78241	1.25156e-05	0.00361014	Homocysteine S-methyltransferase			4.1.2.2.6.3.1	Amino acid metabolism.biosynthesis.aspartate family.aspartate-derived amino acids.methionine.S-methylmethionine cycle.homocysteine S-methyltransferase	XP_019070998.1
Solyc09g015470	3.17949	0.538559	1.31614e-07	6.92291e-05	Protein TIC 56, chloroplastic			23.1.3.1.4	Protein translocation.chloroplast.inner envelope TIC translocation system.TIC-20 complex.component Tic56	XP_004246347.1
Solyc02g070280	3.13265	2.11074	6.55554e-05	0.0139571	Cationic amino acid transporter, putative	GO:0003333|GO:0015171|GO:0016020	amino acid transmembrane transport | amino acid transmembrane transporter activity | membrane	24.2.3.5.2	Solute transport.carrier-mediated transport.APC superfamily.APC family.cationic amino acid transporter (CAT)	XP_019067803.1
Solyc03g118100	3.12806	5.10339	0.000134663	0.0237043	()-neomenthol dehydrogenase			50.1.1	Enzyme classification.EC_1 oxidoreductases.EC_1.1 oxidoreductase acting on CH-OH group of donor	XP_004235853.1
Solyc09g015473	3.09879	0.188441	6.44342e-05	0.0139048	histone-lysine N-methyltransferase ATXR3-like protein			23.1.3.1.4	Protein translocation.chloroplast.inner envelope TIC translocation system.TIC-20 complex.component Tic56	XP_004246347.1
Solyc09g092310	3.07606	2.72451	1.0551e-06	0.000460228	Ph-3 resistance protein	GO:0043531	ADP binding	35.1	not assigned.annotated	XP_004247881.1	AT3G46530.1
Solyc09g018170	3.04884	0.995068	0.0001408	0.0241371	MAP kinase kinase kinase 70	GO:0004672|GO:0006468	protein kinase activity | protein phosphorylation	18.4.2.4	Protein modification.phosphorylation.STE protein kinase superfamily.protein kinase (MAP3K-WNK)	XP_004246271.1
Solyc09g015475	3.04499	-0.612089	9.99326e-05	0.0191144	SPOC domain / Transcription elongation factor S-II protein			35.1	not assigned.annotated	XP_004246347.1
Solyc03g116510	3.00371	5.30504	2.18708e-05	0.00579462	cotton fiber protein			35.2	not assigned.not annotated	XP_010321083.1
Solyc11g072470	2.99715	5.77082	8.27609e-06	0.00258944	LOB domain-containing protein, putative			15.5.24	RNA biosynthesis.transcriptional regulation.transcription factor (AS2/LOB)	XP_004251265.1
Solyc08g078460	2.8816	5.99018	0.000145885	0.02473	Oxidoreductase family protein	GO:0016491	oxidoreductase activity	10	Redox homeostasis	XP_004245781.1
Solyc06g024380	2.79522	1.97949	0.000272777	0.0399864	DNA polymerase epsilon catalytic subunit			35.2	not assigned.not annotated	XP_025884342.1
Solyc09g018550	2.79486	0.344163	9.87402e-05	0.0189878	LOW QUALITY:RNA-binding (RRM/RBD/RNP motifs) family protein			35.2	not assigned.not annotated	XP_025886939.1
Solyc06g071580	2.74568	2.91116	2.03225e-06	0.000790104	MORC family CW-type zinc finger protein 4			12.5.1.2	Chromatin organisation.DNA methylation.RNA-directed DNA methylation (RdDM) pathway.auxiliary factor (MORC)	XP_010322545.1
Solyc03g111690	2.66327	10.2999	5.06836e-06	0.00169425	Pectate lyase family protein			21.3.5.2	Cell wall organisation.pectin.modification and degradation.pectate lyase	NP_001351955.1
Solyc03g097580	2.62212	5.25906	1.26615e-05	0.003623	Bidirectional sugar transporter SWEET	GO:0016021	integral component of membrane	24.2.6.1	Solute transport.carrier-mediated transport.TOC superfamily.sugar efflux transporter (SWEET)	XP_019068532.1
Solyc08g074940	2.62002	4.38827	0.000251414	0.0376259	Eukaryotic aspartyl protease family protein	GO:0004190|GO:0006508	aspartic-type endopeptidase activity | proteolysis	19.4.3.1	Protein homeostasis.proteolysis.aspartic-type peptidase activities.A1-class protease (Pepsin)	XP_004246049.1
Solyc05g024260	2.59479	6.7693	7.69739e-05	0.0156432	Bidirectional sugar transporter SWEET	GO:0016021	integral component of membrane	24.2.6.1	Solute transport.carrier-mediated transport.TOC superfamily.sugar efflux transporter (SWEET)	XP_004239304.1
Solyc07g049550	2.5173	7.16291	0.000108817	0.0202717	1-aminocyclopropane-1-carboxylate oxidase 1	GO:0016491|GO:0055114	oxidoreductase activity | oxidation-reduction process	11.5.1.2	Phytohormone action.ethylene.biosynthesis.1-aminocyclopropane-1-carboxylate (ACC) oxidase	NP_001233928.1
Solyc05g025683	2.51695	2.23712	9.74735e-05	0.0188456	Respiratory burst oxidase, putative			10.1.1	Redox homeostasis.reactive oxygen generation.NADPH-oxidase (Rboh)	XP_004239582.1
Solyc12g039080	2.51259	3.26604	5.04384e-07	0.000247135	Leucine-rich repeat protein kinase family protein			35.1	not assigned.annotated	XP_025888725.1
Solyc07g065290	2.49332	2.74144	8.01984e-05	0.0161154	Zinc finger transcription factor 51	GO:0046872	metal ion binding	15.5.16	RNA biosynthesis.transcriptional regulation.transcription factor (C3H-ZF)	XP_025887958.1
Solyc08g078650	2.4617	4.93805	6.76659e-05	0.0142369	Nucleotide-diphospho-sugar transferases superfamily protein	GO:0006486|GO:0016757	protein glycosylation | transferase activity, transferring glycosyl groups	35.1	not assigned.annotated	XP_004245766.1
Solyc07g006600	2.40998	4.75156	2.10678e-05	0.00565112	glutamine dumper 3			35.2	not assigned.not annotated	XP_004242668.1	AT5G57685.1
Solyc02g062390	2.4069	6.3406	4.63637e-05	0.0108388	Dehydrin	GO:0006950|GO:0009415	response to stress | response to water	26.4.3.1	External stimuli response.temperature.cold response.cold sensor (COLD1)	XP_004233545.1
Solyc06g005960	2.37477	5.35016	5.25683e-08	3.0824e-05	dentin sialophosphoprotein			35.2	not assigned.not annotated	XP_010321911.1
Solyc04g011540	2.36947	3.88939	7.54117e-05	0.0155019	Calcium-dependent lipid-binding (CaLB domain) family protein	GO:0005515	protein binding	35.1	not assigned.annotated	XP_010319255.1
Solyc10g084880	2.34255	6.92558	2.46522e-05	0.00648352	LOW QUALITY:Avr9/Cf-9 rapidly elicited protein 137			35.2	not assigned.not annotated	NP_001234706.2
Solyc01g016970	2.33195	1.1362	7.2251e-05	0.0150249	LOW QUALITY:Autophagy protein 5			35.2	not assigned.not annotated
Solyc01g107857	2.32915	4.23231	2.85722e-05	0.00740559	Glycosyltransferase	GO:0008152|GO:0016758	metabolic process | transferase activity, transferring hexosyl groups	35.1	not assigned.annotated	NP_001315561.1
Solyc10g006880	2.32792	8.00461	1.03848e-05	0.00309535	Non-ripening (nor) NAC domain protein	GO:0003677|GO:0006355	DNA binding | regulation of transcription, DNA-templated	15.5.17	RNA biosynthesis.transcriptional regulation.transcription factor (NAC)	NP_001234652.1
Solyc06g051800	2.30045	6.79947	3.00342e-05	0.00761889	expansin 1	GO:0009664	plant-type cell wall organization	21.4.2.1	Cell wall organisation.cell wall proteins.expansin activities.alpha-class expansin	NP_001233958.1
Solyc09g057650	2.27226	5.37886	1.05556e-09	8.2077e-07	40S ribosomal protein S8	GO:0003735|GO:0005622|GO:0005840|GO:0006412	structural constituent of ribosome | intracellular | ribosome | translation	17.1.3.1.9	Protein biosynthesis.ribosome biogenesis.small ribosomal subunit (SSU).SSU proteome.component RPS8	XP_004247043.1
Solyc03g034140	2.22555	3.46511	9.24888e-05	0.017979	Quinone reductase family protein	GO:0016491	oxidoreductase activity	10.1	Redox homeostasis.reactive oxygen generation	XP_004234563.1
Solyc09g047930	2.20941	2.27222	0.00011414	0.0211532	maternal effect embryo arrest protein			35.2	not assigned.not annotated	XP_019071347.1	AT3G07510.1
Solyc02g089150	2.17987	4.1823	3.68766e-06	0.00130594	PI-PLC X domain-containing protein	GO:0006629|GO:0008081	lipid metabolic process | phosphoric diester hydrolase activity	35.1	not assigned.annotated	XP_004232139.1
Solyc07g056040	2.13525	4.38894	4.99886e-08	2.97999e-05	CASP-like protein			35.1	not assigned.annotated	XP_004243226.1
Solyc12g017250	2.12102	7.73502	0.000135196	0.0237043	Photosystem II 10 kDa polypeptide family protein	GO:0009523|GO:0009654|GO:0015979|GO:0042651	photosystem II | photosystem II oxygen evolving complex | photosynthesis | thylakoid membrane	1.1.1.2.9	Photosynthesis.photophosphorylation.photosystem II.PS-II complex.component PsbR	XP_004251952.1
Solyc02g032170	2.09851	1.49548	0.000354916	0.0488255	Alpha/beta-hydrolase			21.9.1.6	Cell wall organisation.cutin and suberin.cuticular lipid formation.acyl-reduction pathway	XP_025888029.1
Solyc04g071770	2.06949	3.8491	0.000317436	0.0454162	Ethylene-responsive transcription factor	GO:0003700|GO:0006355	DNA-binding transcription factor activity | regulation of transcription, DNA-templated	15.5.7.1	RNA biosynthesis.transcriptional regulation.AP2/ERF transcription factor superfamily.transcription factor (ERF)	XP_004237817.1
Solyc04g008500	1.94982	3.25557	1.24326e-06	0.000523163	Zinc finger protein, putative	GO:0046872	metal ion binding	15.5.15	RNA biosynthesis.transcriptional regulation.transcription factor (C2H2-ZF)	XP_004236896.1
Solyc09g082810	1.94786	3.90633	9.2297e-05	0.017979	Glycine-rich protein			35.2	not assigned.not annotated	NP_001292912.1
Solyc01g098490	1.92849	3.53737	0.000299797	0.0432385	Sugar facilitator protein 1	GO:0016021|GO:0022857|GO:0055085	integral component of membrane | transmembrane transporter activity | transmembrane transport	24.2.2.1.5	Solute transport.carrier-mediated transport.MFS superfamily.SP family.monosaccharide transporter (ERD6)	XP_010312431.1
Solyc07g052960	1.91158	7.90061	2.91476e-05	0.00750036	GRAS family TF			15.5.12	RNA biosynthesis.transcriptional regulation.transcription factor (GRAS)	XP_004243434.1
Solyc02g085600	1.91125	6.14515	6.23282e-08	3.53866e-05	Transcription factor GRAS			15.5.12	RNA biosynthesis.transcriptional regulation.transcription factor (GRAS)	XP_004232383.1	AT4G36710.1
Solyc01g107830	1.89818	7.7244	3.45129e-05	0.00863257	Glycosyltransferase	GO:0008152|GO:0016758	metabolic process | transferase activity, transferring hexosyl groups	9.2.2.6.1	Secondary metabolism.phenolics.flavonoid biosynthesis.flavonol glycosides.flavonol 3-O-glycosyltransferase	XP_004230760.1
Solyc09g055890	1.88317	2.83843	0.000139629	0.0241268	Lipoxygenase	GO:0016702|GO:0046872|GO:0055114	oxidoreductase activity, acting on single donors with incorporation of molecular oxygen, incorporation of two atoms of oxygen | metal ion binding | oxidation-reduction process	35.1	not assigned.annotated	XP_010326261.1
Solyc03g097700	1.71066	7.24532	6.20981e-05	0.0137958	O-methyltransferase	GO:0046983	protein dimerization activity	50.2.1	Enzyme classification.EC_2 transferases.EC_2.1 transferase transferring one-carbon group	XP_004235335.1
Solyc12g088680	1.69844	3.27476	0.000117085	0.0214763	Ubiquitin-conjugating enzyme			19.2.2.2.3	Protein homeostasis.ubiquitin-proteasome system.ubiquitin-fold protein conjugation.SUMO conjugation (sumoylation).SUMO conjugation E2 enzyme (SCE1)	XP_004252754.1
Solyc10g083580	1.60186	7.70155	2.71429e-06	0.00100087	Phytosulfokine 3, putative	GO:0005576|GO:0008083|GO:0008283	extracellular region | growth factor activity | cell population proliferation	11.10.1.2.1	Phytohormone action.signalling peptides.NCRP (non-cysteine-rich-peptide) category.phytosulfokine activity.pythosulfokine precursor polypeptide (PSK)	NP_001333918.1
Solyc01g104130	1.53754	6.90557	0.00021802	0.0345051	2-oxoglutarate (2OG) and Fe(II)-dependent oxygenase-like protein	GO:0016491|GO:0055114	oxidoreductase activity | oxidation-reduction process	16.5.3.1	RNA processing.mRNA modification.N6-methyladenosine demethylation.demethylase (ALKBH9)	XP_004230493.1
Solyc09g092500	1.53662	8.80938	8.16067e-05	0.0163067	Glycosyltransferase	GO:0008152|GO:0016758	metabolic process | transferase activity, transferring hexosyl groups	50.2.4	Enzyme classification.EC_2 transferases.EC_2.4 glycosyltransferase	NP_001348274.1	AT4G14090.1
Solyc03g096670	1.49931	5.96689	0.000139064	0.0241268	Protein phosphatase 2C	GO:0043169	cation binding	18.4.24.2.1	Protein modification.phosphorylation.serine/threonine protein phosphatase superfamily.PPM/PP2C Mn/Mg-dependent phosphatase families.clade A phosphatase	NP_001234692.2
Solyc07g055140	1.45124	4.57299	0.000256745	0.0382635	DUF688 family protein			35.2	not assigned.not annotated	XP_025887894.1
Solyc09g057875	1.42242	2.59856	0.000333436	0.0469542	Far-red impaired responsive (FAR1) family protein	GO:0006355	regulation of transcription, DNA-templated	15.5.46	RNA biosynthesis.transcriptional regulation.transcription factor (FAR1)	XP_004247048.1
Solyc08g008550	1.40212	5.40847	1.79412e-06	0.000713022	Kinase	GO:0005524	ATP binding	18.4.2.3	Protein modification.phosphorylation.STE protein kinase superfamily.protein kinase (MAP4K)	XP_004244653.1
Solyc09g061710	1.37503	4.78432	1.6457e-05	0.00456306	Alba DNA/RNA-binding protein	GO:0003676	nucleic acid binding	16.3.3.6	RNA processing.ribonuclease activities.RNA-dependent RNase P complex.component RPP25/POP6|RPP20/POP7	XP_004247299.3
Solyc09g057660	-1.03625	6.73475	0.00032202	0.0458885	Peptidyl-prolyl cis-trans isomerase	GO:0005515	protein binding	18.12.2	Protein modification.protein folding.protein folding catalyst (FKBP)	XP_004247044.1
Solyc06g068670	-1.22797	6.03224	0.00017907	0.0291135	ACT domain-containing protein	GO:0008152|GO:0016597	metabolic process | amino acid binding	35.1	not assigned.annotated	NP_001295110.1
Solyc09g009530	-1.28106	6.4502	8.32549e-06	0.00258944	alpha/beta-Hydrolases superfamily protein			35.2	not assigned.not annotated	NP_001311389.1
Solyc06g068230	-1.34994	5.38756	0.000245078	0.0376076	Tetratricopeptide repeat (TPR)-like superfamily protein	GO:0005515	protein binding	35.1	not assigned.annotated	XP_004241691.2
Solyc02g083310	-1.40698	5.36634	0.000231113	0.036098	Wound-responsive family protein, putative	GO:0004518	nuclease activity	35.1	not assigned.annotated	XP_004232531.1
Solyc09g011080	-1.45603	3.67615	4.48095e-05	0.0106142	Ribulose bisphosphate carboxylase/oxygenase activase	GO:0005524	ATP binding	1.2.1.3.2	Photosynthesis.calvin cycle.ribulose-1,5-bisphosphat carboxylase/oxygenase (RuBisCo) activity.RuBisCo regulation.ATP-dependent activase (RCA)	XP_010325843.1
Solyc03g081240	-1.48817	4.40796	7.44164e-05	0.0153857	Two-component response regulator-like protein	GO:0005515	protein binding	27.1.4	Multi-process regulation.circadian clock system.time-of-day-dependent expressed repressor (PRR)	XP_004235024.1
Solyc06g073300	-1.55171	8.56217	9.38772e-06	0.00282168	60S ribosomal protein L27	GO:0003735|GO:0005622|GO:0005840|GO:0006412	structural constituent of ribosome | intracellular | ribosome | translation	17.1.2.1.27	Protein biosynthesis.ribosome biogenesis.large ribosomal subunit (LSU).LSU proteome.component RPL27	XP_004241408.1	AT4G15000.1
Solyc02g078150	-1.59562	6.59687	0.000270582	0.0398279	DUF506 family protein			35.2	not assigned.not annotated	XP_004232883.1
Solyc10g005030	-1.61051	2.9527	0.000245646	0.0376076	Pseudo-response regulator 9	GO:0005515	protein binding	27.1.4	Multi-process regulation.circadian clock system.time-of-day-dependent expressed repressor (PRR)	XP_010327246.1
Solyc03g117675	-1.63722	5.90329	0.000159219	0.0264881	ATP-dependent DNA helicase			13.2.1.2	Cell cycle organisation.DNA replication.preinitiation.MCM replicative DNA helicase complex	XP_004235885.1
Solyc01g104950	-1.68937	6.08466	6.45418e-07	0.000299809	LEXYL2	GO:0004553|GO:0005975	hydrolase activity, hydrolyzing O-glycosyl compounds | carbohydrate metabolic process	21.3.2.2.3.2	Cell wall organisation.pectin.rhamnogalacturonan I.modification and degradation.alpha-L-arabinofuranosidase activities.bifunctional alpha-L-arabinofuranosidase and beta-D-xylosidase (BXL)	NP_001296718.1
Solyc10g085850	-1.74151	4.07653	0.000340192	0.0473463	LOW QUALITY:S-locus lectin protein kinase family protein			35.2	not assigned.not annotated	XP_010316864.1
Solyc03g115870	-1.75565	4.35115	0.000103836	0.019445	Thioredoxin	GO:0045454	cell redox homeostasis	10.5.7	Redox homeostasis.chloroplast redox homeostasis.atypical thioredoxin (ACHT)	XP_004236024.1
Solyc07g063610	-1.78405	4.40603	0.000124552	0.0223868	Dynein light chain family protein	GO:0007017|GO:0030286	microtubule-based process | dynein complex	35.2	not assigned.not annotated	XP_004244185.1
Solyc06g063370	-1.88332	7.14593	0.000250914	0.0376259	Type I (26 kD) CP29 polypeptide	GO:0009765|GO:0016020	photosynthesis, light harvesting | membrane	1.1.1.1.3	Photosynthesis.photophosphorylation.photosystem II.LHC-II complex.component LHCb5	NP_001317571.1
Solyc11g072310	-1.90741	4.935	1.11856e-05	0.00325273	gibberellin 20-oxidase-3	GO:0016491|GO:0055114	oxidoreductase activity | oxidation-reduction process	11.6.1.5	Phytohormone action.gibberellin.biosynthesis.gibberellin 20-oxidase	NP_001234579.1
Solyc01g080020	-2.04508	5.74884	4.42576e-06	0.00152212	Eukaryotic aspartyl protease family protein, putative	GO:0004190|GO:0006508	aspartic-type endopeptidase activity | proteolysis	19.4.3.1	Protein homeostasis.proteolysis.aspartic-type peptidase activities.A1-class protease (Pepsin)	XP_004229435.1	AT1G03230.1
Solyc06g068435	-2.19454	2.1578	7.36298e-06	0.00235142	Sister chromatid cohesion protein PDS5 like B-B			13.3.5.3.2	Cell cycle organisation.mitosis and meiosis.sister chromatid separation.cohesin establishment.cohesin cofactor (PDS5)	XP_025887402.1
Solyc07g007250	-2.33178	5.25423	6.45324e-05	0.0139048	Metallocarboxypeptidase inhibitor	GO:0004866	endopeptidase inhibitor activity	35.1	not assigned.annotated	NP_001233934.1
Solyc03g083770	-2.50129	1.96268	0.000136982	0.0239004	Plant invertase/pectin methylesterase inhibitor superfamily protein	GO:0004857	enzyme inhibitor activity	3.1.4.1	Carbohydrate metabolism.sucrose metabolism.degradation.invertase activities	XP_004234934.1	AT5G62360.1
Solyc10g086620	-2.5121	4.21801	7.07893e-06	0.00228119	NAD(P)-binding Rossmann-fold superfamily protein	GO:0016491	oxidoreductase activity	50.1.1	Enzyme classification.EC_1 oxidoreductases.EC_1.1 oxidoreductase acting on CH-OH group of donor	XP_004249635.1
Solyc07g063600	-2.60107	4.43883	4.28092e-05	0.010208	Chlorophyll a-b binding protein, chloroplastic	GO:0009765|GO:0016020	photosynthesis, light harvesting | membrane	1.1.1.1.1	Photosynthesis.photophosphorylation.photosystem II.LHC-II complex.component LHCb1/2/3	XP_004244187.1
Solyc02g086970	-2.60619	7.45274	8.95838e-09	5.93377e-06	Aldehyde dehydrogenase	GO:0008152|GO:0016491|GO:0055114	metabolic process | oxidoreductase activity | oxidation-reduction process	50.1.2 | 27	Enzyme classification.EC_1 oxidoreductases.EC_1.2 oxidoreductase acting on aldehyde or oxo group of donor | Multi-process regulation	XP_010316283.1
Solyc04g071820	-2.71396	-0.0426637	6.60609e-05	0.0139815	Cytochrome P450	GO:0016705|GO:0055114	oxidoreductase activity, acting on paired donors, with incorporation or reduction of molecular oxygen | oxidation-reduction process	50.1.13	Enzyme classification.EC_1 oxidoreductases.EC_1.14 oxidoreductase acting on paired donor with incorporation or reduction of molecular oxygen	XP_010320112.1
Solyc01g079470	-2.85766	3.28484	0.000121601	0.0219668	CP12			1.2	Photosynthesis.calvin cycle	XP_004229393.1
Solyc01g080680	-2.85919	4.51473	0.000340084	0.0473463	Sugar facilitator protein 3	GO:0016021|GO:0022857|GO:0055085	integral component of membrane | transmembrane transporter activity | transmembrane transport	24.2.2.1.5	Solute transport.carrier-mediated transport.MFS superfamily.SP family.monosaccharide transporter (ERD6)	XP_004229493.1
Solyc02g070940	-2.88606	4.26419	1.96994e-05	0.00537869	Chlorophyll a-b binding protein, chloroplastic	GO:0009765|GO:0016020	photosynthesis, light harvesting | membrane	1.1.1.1.1	Photosynthesis.photophosphorylation.photosystem II.LHC-II complex.component LHCb1/2/3	NP_001333218.1	AT1G29930.1
Solyc02g081980	-2.93366	2.99621	0.000302077	0.0433923	Apyrase	GO:0016787	hydrolase activity	50.3.6	Enzyme classification.EC_3 hydrolases.EC_3.6 hydrolase acting on acid anhydride	XP_004232617.1
Solyc09g083100	-2.95396	4.25883	2.58064e-08	1.61938e-05	Non-specific serine/threonine protein kinase	GO:0007165	signal transduction	18.4.5.3	Protein modification.phosphorylation.CAMK protein kinase superfamily.SNF1-related protein kinase (SnRK3)	XP_004247630.1	AT3G23000.1
Solyc02g076640	-2.99291	-0.743085	0.000298831	0.0432385	LOW QUALITY:transcription factor-like protein	GO:0006351|GO:0043565	transcription, DNA-templated | sequence-specific DNA binding	35.1	not assigned.annotated	XP_010316825.1	AT4G18650.1
Solyc05g024230	-3.01228	2.79756	0.00014161	0.0241371	ATP-dependent 6-phosphofructokinase			2.1.1.1.1	Cellular respiration.glycolysis.cytosolic glycolysis.phosphofructokinase activities.ATP-dependent phosphofructokinase	XP_004245542.1
Solyc08g082990	-3.02924	5.51454	4.77356e-11	4.87831e-08	Oligopeptide transporter, putative	GO:0055085	transmembrane transport	24.2.10.2	Solute transport.carrier-mediated transport.OPT family.oligopeptide transporter (OPT)	XP_004245468.1
Solyc07g064210	-3.0361	1.62614	2.01112e-05	0.00544954	LOW QUALITY:Grain softness protein			35.2	not assigned.not annotated	XP_004244148.1	AT4G27170.1
Solyc06g009190	-3.03831	4.61628	2.3424e-06	0.000881926	Pectinesterase	GO:0005618|GO:0030599|GO:0042545	cell wall | pectinesterase activity | cell wall modification	21.3.1.2.1	Cell wall organisation.pectin.homogalacturonan.modification and degradation.pectin methylesterase	XP_010321856.1
Solyc03g005760	-3.07864	8.15367	6.83995e-07	0.000313655	chlorophyll a/b-binding protein	GO:0009765|GO:0016020	photosynthesis, light harvesting | membrane	1.1.1.1.1	Photosynthesis.photophosphorylation.photosystem II.LHC-II complex.component LHCb1/2/3	XP_010317413.1	AT1G29930.1
Solyc10g008680	-3.14076	0.0775961	7.63402e-05	0.0156031	Anthocyanin 5-aromatic acyltransferase	GO:0016747	transferase activity, transferring acyl groups other than amino-acyl groups	50.2.3	Enzyme classification.EC_2 transferases.EC_2.3 acyltransferase	XP_025883531.1
Solyc03g005770	-3.20441	4.08491	2.77784e-05	0.0072524	chlorophyll a/b-binding protein	GO:0009765|GO:0016020	photosynthesis, light harvesting | membrane	1.1.1.1.1	Photosynthesis.photophosphorylation.photosystem II.LHC-II complex.component LHCb1/2/3	NP_001316911.1
Solyc09g058980	-3.23289	0.554061	5.64831e-05	0.0127866	long-chain acyl-CoA synthetase 7			35.2	not assigned.not annotated	XP_004243697.1
Solyc01g090360	-3.25467	1.49136	1.45212e-06	0.000597004	non-specific lipid-transfer protein	GO:0006869|GO:0008289	lipid transport | lipid binding	22	Vesicle trafficking	NP_001316123.1
Solyc05g010650	-3.33523	-1.04071	6.53327e-05	0.0139571	U box domain-containing protein	GO:0005515	protein binding	19.2.2.1.5.2.1	Protein homeostasis.ubiquitin-proteasome system.ubiquitin-fold protein conjugation.ubiquitin conjugation (ubiquitylation).ubiquitin-ligase E3 activities.U-Box E3 ligase activities.E3 ubiquitin ligase (PUB)	XP_004239445.2
Solyc09g074380	-3.49855	2.86638	6.23803e-07	0.000293581	DCD (Development and Cell Death) domain protein			35.1	not assigned.annotated	XP_010326613.1
Solyc09g063060	-3.57613	-1.9689	0.000205009	0.0327355	GDSL esterase/lipase	GO:0016788	hydrolase activity, acting on ester bonds	21.9.5.2	Cell wall organisation.cutin and suberin.cutin polyester biosynthesis.cutin synthase (CD)	XP_004247304.1
Solyc09g059170	-3.5765	3.70126	6.75075e-06	0.00221524	Glycosyltransferase	GO:0008152|GO:0016758	metabolic process | transferase activity, transferring hexosyl groups	50.2.4	Enzyme classification.EC_2 transferases.EC_2.4 glycosyltransferase	XP_004247056.1
Solyc12g038805	-3.65229	-0.0447673	3.72091e-05	0.00911571	Serine/threonine-protein kinase			35.2	not assigned.not annotated	XP_010321858.1
Solyc10g054900	-3.65713	3.55907	7.46445e-09	5.03752e-06	Proline-rich protein			35.1	not assigned.annotated	XP_004248679.1
Solyc01g096670	-3.81489	0.130527	2.0079e-06	0.000789217	Cytochrome P450, putative	GO:0016705|GO:0055114	oxidoreductase activity, acting on paired donors, with incorporation or reduction of molecular oxygen | oxidation-reduction process	21.6.1.2	Cell wall organisation.lignin.monolignol biosynthesis.p-coumaroyl shikimate/quinate 3+IBk--hydroxylase (C3H)	XP_004230046.1
Solyc03g005780	-3.83716	2.52088	0.000132713	0.0234993	chlorophyll a/b-binding protein Cab-3C	GO:0009765|GO:0016020	photosynthesis, light harvesting | membrane	1.1.1.1.1	Photosynthesis.photophosphorylation.photosystem II.LHC-II complex.component LHCb1/2/3	NP_001316912.1
Solyc07g008103	-3.8427	3.49174	4.17391e-10	3.59851e-07	Blue copper protein	GO:0009055	electron transfer activity	2.4	Cellular respiration.oxidative phosphorylation	NP_001234429.1
Solyc09g042670	-3.8892	2.20506	4.29712e-12	4.52057e-09	Methyltransferase MT-A70 family protein isoform 1			35.2	not assigned.not annotated	XP_004246979.1
Solyc12g011040	-3.97645	0.109427	9.05079e-05	0.0179733	Lipoxygenase	GO:0016702|GO:0046872|GO:0055114	oxidoreductase activity, acting on single donors with incorporation of molecular oxygen, incorporation of two atoms of oxygen | metal ion binding | oxidation-reduction process	11.7.1.2	Phytohormone action.jasmonic acid.biosynthesis.13-lipoxygenase	XP_004251816.1
Solyc02g014430	-4.02011	2.27961	0.000102686	0.0193309	Equilibrative nucleoside transporter	GO:0005337|GO:0006810|GO:0016021	nucleoside transmembrane transporter activity | transport | integral component of membrane	24.2.17	Solute transport.carrier-mediated transport.nucleoside transporter (ENT)	XP_004231487.1
Solyc01g087790	-4.27978	1.47557	1.38628e-07	7.18614e-05	LOW QUALITY:subtilisin-like serine protease family protein	GO:0004252|GO:0006508	serine-type endopeptidase activity | proteolysis	19.4.2.1.1	Protein homeostasis.proteolysis.serine-type peptidase activities.S8-class protease (subtilisin) families.protease (SBT1)	NP_001316530.1	AT5G67090.1
Solyc04g064763	-4.29018	4.91636	1.74346e-22	4.79693e-19	Zinc finger CCCH domain-containing protein 38	GO:0046872	metal ion binding	15.5.16	RNA biosynthesis.transcriptional regulation.transcription factor (C3H-ZF)	XP_004237735.1
Solyc04g072790	-4.39284	-2.37194	0.000330687	0.0467511	Cellulose synthase	GO:0016020|GO:0016760|GO:0030244	membrane | cellulose synthase (UDP-forming) activity | cellulose biosynthetic process	21.1.1.1.1	Cell wall organisation.cellulose.cellulose synthase complex (CSC).CSC components.catalytic component CesA	XP_004238519.1
Solyc01g100750	-4.44115	0.3169	0.00023043	0.036098	LOW QUALITY:plant/protein (Protein of unknown function, DUF538)			35.2	not assigned.not annotated	XP_004230325.1	AT1G56580.1
Solyc06g074390	-4.48117	-0.018724	4.62833e-05	0.0108388	Fatty acyl-CoA reductase	GO:0080019	fatty-acyl-CoA reductase (alcohol-forming) activity	21.9.1.6.1	Cell wall organisation.cutin and suberin.cuticular lipid formation.acyl-reduction pathway.acyl CoA reductase	XP_004241314.1
Solyc11g068630	-4.56676	-0.837913	5.9779e-06	0.00197979	Unknown			35.2	not assigned.not annotated
Solyc03g006100	-4.57114	3.66929	7.65543e-07	0.000346607	Receptor-kinase, putative	GO:0005524	ATP binding	18.4.1.12	Protein modification.phosphorylation.TKL protein kinase superfamily.protein kinase (LRR-XII)	XP_004234250.3
Solyc03g006410	-4.64896	-1.24249	0.000352944	0.0488255	DUF506 family protein			35.2	not assigned.not annotated	XP_004234117.1
Solyc02g073571	-4.66596	0.835815	2.3621e-10	2.16635e-07	UPF0183 protein family			13	Cell cycle organisation	XP_019067938.2
Solyc06g066280	-4.68152	-1.24059	5.12965e-05	0.0118372	Cytochrome P450, putative	GO:0016705|GO:0055114	oxidoreductase activity, acting on paired donors, with incorporation or reduction of molecular oxygen | oxidation-reduction process	50.1.13	Enzyme classification.EC_1 oxidoreductases.EC_1.14 oxidoreductase acting on paired donor with incorporation or reduction of molecular oxygen	XP_019069749.1
Solyc03g006110	-4.72264	-0.203654	4.78534e-05	0.0111144	Non-specific serine/threonine protein kinase	GO:0007165	signal transduction	18.4.5.3	Protein modification.phosphorylation.CAMK protein kinase superfamily.SNF1-related protein kinase (SnRK3)	XP_004234086.1
Solyc01g016455	-4.74253	2.55628	4.6921e-09	3.22744e-06	Ubiquitin carboxyl-terminal hydrolase-related protein			19.2	Protein homeostasis.ubiquitin-proteasome system	XP_010318961.1
Solyc09g059020	-4.7845	4.88472	4.66904e-28	1.85558e-24	Quinone-oxidoreductase QR1	GO:0016491	oxidoreductase activity	35.1	not assigned.annotated	XP_010326282.1
Solyc09g014310	-4.80692	0.358446	0.000115563	0.0213064	Desiccation-related PCC13-62			35.1	not assigned.annotated	XP_004246335.2
Solyc05g055990	-4.92136	-0.563438	0.000195117	0.0315232	plasma membrane intrinsic protein 2.12	GO:0005215|GO:0006810|GO:0016020	transporter activity | transport | membrane	24.3.1.2	Solute transport.channels.MIP family.plasma membrane intrinsic protein (PIP)	XP_004239679.1
Solyc06g034310	-4.98102	0.259469	4.7966e-06	0.00163395	Myb/SANT-like DNA-binding domain protein			35.2	not assigned.not annotated	XP_025883703.1
Solyc05g043390	-5.01333	0.0744233	0.000261941	0.038876	Pseudouridine-5'-phosphate glycosidase			6.1	Nucleotide metabolism.purines	XP_004248187.1
Solyc08g006490	-5.03535	-2.66292	0.000267852	0.039589	transcriptional factor B3 family protein	GO:0003677	DNA binding	15.5.5.2	RNA biosynthesis.transcriptional regulation.B3 transcription factor superfamily.transcription factor (REM)	XP_019070638.1
Solyc06g009890	-5.04189	1.01734	3.98704e-08	2.45877e-05	PHD finger family protein			35.2	not assigned.not annotated	XP_010313748.1
Solyc01g104400	-5.07862	0.480823	0.000141713	0.0241371	Basic blue protein	GO:0009055	electron transfer activity	35.1	not assigned.annotated	XP_004230515.1
Solyc02g065280	-5.08366	4.52317	1.69337e-08	1.08158e-05	Methyl esterase			27	Multi-process regulation	XP_004233421.1
Solyc01g016460	-5.21158	-0.617724	9.49905e-08	5.22711e-05	Phototropic-responsive NPH3 family protein			35.2	not assigned.not annotated
Solyc01g008940	-5.26675	-2.67371	0.000290427	0.0422275	LOW QUALITY:ATPase E1-E2 type family protein / haloacid dehalogenase-like hydrolase family protein			24.1.1.2.5	Solute transport.primary active transport.V-type ATPase complex.peripheral V1 subcomplex.subunit E	XP_010326006.2
Solyc04g064765	-5.27136	1.5348	6.11557e-07	0.000291656	exostosin family protein			22.6.1	Vesicle trafficking.target membrane tethering.GARP/EARP (Golgi-/Endosome-Associated-Retrograde-Protein) complexes	XP_004237735.1
Solyc09g047920	-5.35483	2.01552	1.41988e-12	1.58707e-09	Protein kinase			35.2	not assigned.not annotated	XP_004252831.1
Solyc05g007790	-5.3988	-2.53535	0.000101295	0.0191936	CASP-like protein			35.1	not assigned.annotated	XP_004238811.1
Solyc01g066613	-5.44082	2.2714	4.85567e-19	1.02163e-15	Guanylate-binding family protein	GO:0003924|GO:0005525	GTPase activity | GTP binding	27.4	Multi-process regulation.Rop-GTPase regulatory system	XP_025886291.1
Solyc05g009200	-5.50874	2.40191	4.51445e-10	3.75518e-07	DUF1639 family protein			35.2	not assigned.not annotated	XP_004239412.1
Solyc12g038810	-5.54187	1.28588	1.39243e-05	0.00395274	Protein kinase			18.4.1	Protein modification.phosphorylation.TKL protein kinase superfamily	XP_010312865.1
Solyc09g015380	-6.02643	0.891972	0.000354463	0.0488255	Abscisic acid receptor			11.1.2.1.1.1	Phytohormone action.abscisic acid.perception and signalling.PYR/PYL-receptor.cytoplasm-localized receptor complex.receptor component PYL/RCAR	XP_004246292.1	AT2G40330.1
Solyc05g014580	-6.14298	-1.64726	6.42335e-05	0.0139048	LOW QUALITY:FER-like regulator of iron uptake			25.4.1	Nutrient uptake.iron uptake.regulation	XP_025887554.1
Solyc09g055660	-6.19571	-0.456335	6.14075e-08	3.53866e-05	Bromodomain	GO:0005515	protein binding	35.2	not assigned.not annotated	XP_019071059.1
Solyc03g006540	-6.42356	-1.87923	8.94363e-06	0.00273415	NADH-ubiquinone oxidoreductase 75 kDa subunit, mitochondrial			2.4.1.4.1	Cellular respiration.oxidative phosphorylation.NADH dehydrogenase complex.non-core components.alpha subcomplex	XP_004234127.1
Solyc03g005900	-6.52001	-1.28744	0.000325152	0.046151	GDSL-lipase protein	GO:0016788	hydrolase activity, acting on ester bonds	5.7.1	Lipid metabolism.lipid degradation.triacylglycerol lipase activities	XP_004234068.1
Solyc07g051845	-6.60654	-2.78194	5.97724e-05	0.0133621	Disease resistance protein (TIR-NBS-LRR class) family			35.2	not assigned.not annotated	XP_010325813.1
Solyc09g059477	-6.75198	-1.45943	7.77345e-05	0.0157085	Transducin/WD40 repeat-like superfamily protein			35.2	not assigned.not annotated	XP_025888768.1
Solyc04g064600	-6.77708	-2.84126	0.000168654	0.0277992	Structural maintenance of chromosomes protein			35.2	not assigned.not annotated	XP_010320024.3
Solyc08g079370	-6.78443	-2.81311	0.000250655	0.0376259	Cytochrome P450 family protein	GO:0016705|GO:0055114	oxidoreductase activity, acting on paired donors, with incorporation or reduction of molecular oxygen | oxidation-reduction process	50.1.13	Enzyme classification.EC_1 oxidoreductases.EC_1.14 oxidoreductase acting on paired donor with incorporation or reduction of molecular oxygen	XP_004246143.1
Solyc05g010580	-6.86214	-2.80828	4.18187e-05	0.0100387	Nodule Cysteine-Rich (NCR) secreted peptide			35.2	not assigned.not annotated	XP_025886757.1
Solyc10g078610	-7.07749	-0.387019	4.22833e-06	0.00146834	Ethylene-responsive transcription factor	GO:0003700|GO:0006355	DNA-binding transcription factor activity | regulation of transcription, DNA-templated	15.5.7.1 | 26.9.1.7	RNA biosynthesis.transcriptional regulation.AP2/ERF transcription factor superfamily.transcription factor (ERF) | External stimuli response.symbiont.symbiosis signalling pathway.transcription factor (ERN1)	XP_004249156.1	AT5G19790.1
Solyc00g010750	-7.08728	-2.19298	6.96632e-05	0.0145714	Guanylate-binding family protein	GO:0003924|GO:0005525	GTPase activity | GTP binding	35.2	not assigned.not annotated	XP_025884064.1
Solyc01g058210	-7.1456	-1.41099	1.30757e-06	0.000543829	HCO3- transporter family			20.2.2.5	Cytoskeleton organisation.microfilament network.actin polymerisation.villin actin-crosslinking factor	XP_004245187.1
Solyc09g005765	-7.36319	-2.52665	1.70375e-05	0.00468767	T-complex protein 1 subunit zeta 1			35.2	not assigned.not annotated	XP_004246931.1
Solyc09g059125	-7.52551	-2.15175	3.55982e-07	0.000179335	CW14 protein (DUF1336)			35.2	not assigned.not annotated	XP_004236975.1
Solyc09g059130	-8.12072	-0.713136	3.99624e-07	0.000198524	LOW QUALITY:RING/U-box superfamily protein	GO:0005515|GO:0008270	protein binding | zinc ion binding	35.2	not assigned.not annotated	XP_004247279.1	AT3G19950.1
Solyc00g180840	-8.19983	-1.86649	0.000356582	0.0488667	Transposon Ty3-I Gag-Pol polyprotein			35.2	not assigned.not annotated	XP_010315033.1
Solyc09g063040	-8.39893	-1.79177	5.20592e-07	0.000251629	LOW QUALITY:NBS-LRR resistance protein-like protein	GO:0043531	ADP binding	35.2	not assigned.not annotated	XP_019069506.1
Solyc10g012210	-8.49443	-0.546276	1.91809e-10	1.80543e-07	AT-rich interactive domain protein			15.5.25	RNA biosynthesis.transcriptional regulation.transcription factor (ARID)	XP_010326976.1
Solyc12g036870	-8.79634	-0.399952	1.16996e-09	8.90366e-07	Myb/SANT-like DNA-binding domain protein			15.5.2.2	RNA biosynthesis.transcriptional regulation.MYB transcription factor superfamily.transcription factor (MYB-related)	XP_019067004.1
Solyc01g008040	2.93019	2.50448	0.000371691	0.0503988	LOW QUALITY:F-box protein family			19.2.2.8.1.4.6	Protein homeostasis.ubiquitin-proteasome system.ubiquitin-fold protein conjugation.Cullin-based ubiquitylation complexes.SKP1-CUL1-FBX (SCF) E3 ligase complexes.F-BOX substrate adaptor components.component FBX	XP_010317951.1	AT3G06240.1
Solyc05g008235	3.10616	2.08217	0.000369868	0.0503988	MYB transcription factor	GO:0003677	DNA binding	35.1	not assigned.annotated	XP_004238850.1
Solyc09g014520	-1.44165	6.68617	0.000371988	0.0503988	Chlorophyll a-b binding protein, chloroplastic	GO:0009765|GO:0016020	photosynthesis, light harvesting | membrane	1.1.1.1.2	Photosynthesis.photophosphorylation.photosystem II.LHC-II complex.component LHCb4	XP_004246325.1
Solyc07g051860	-3.26197	2.40419	0.00037605	0.0504222	MAP kinase kinase kinase 50	GO:0005524	ATP binding	18.4.2.2	Protein modification.phosphorylation.STE protein kinase superfamily.protein kinase (MAP3K-MEKK)	XP_004243854.1	AT2G32510.1
Solyc09g031975	6.80074	-1.96214	0.000374847	0.0504222	60S acidic ribosomal protein family			35.2	not assigned.not annotated	XP_010319445.1
Solyc09g090070	3.38764	6.11092	0.00037639	0.0504222	phosphate transporter 1	GO:0016021|GO:0022857|GO:0055085	integral component of membrane | transmembrane transporter activity | transmembrane transport	24.2.2.6 | 25.3.2.1	Solute transport.carrier-mediated transport.MFS superfamily.phosphate transporter (PHT1) | Nutrient uptake.phosphorus assimilation.phosphate uptake.phosphate transporter (PHT1)	NP_001234361.2	AT2G38940.1
Solyc09g005320	1.18987	5.1711	0.000387237	0.0516817	RING/U-box superfamily protein	GO:0005515|GO:0008270	protein binding | zinc ion binding	35.1	not assigned.annotated	XP_004246765.1
Solyc07g005420	2.57471	0.200524	0.000389824	0.0518336	Thiamin diphosphate-binding fold (THDP-binding) superfamily protein			35.2	not assigned.not annotated	XP_004231179.1
Solyc04g077810	4.32492	3.17466	0.000395605	0.0524075	LOW QUALITY:ZCF37, putative			35.2	not assigned.not annotated	XP_019069220.1	AT1G59590.1
Solyc06g065825	1.10865	4.85633	0.000403578	0.0532664	dipeptide transport ATP-binding protein			35.2	not assigned.not annotated	XP_019070120.1
Solyc11g007420	6.10627	0.235483	0.000408768	0.053753	LOW QUALITY:Receptor-like protein kinase			35.1	not assigned.annotated	XP_025883939.1	AT5G38280.1
Solyc03g006490	-2.63546	5.89857	0.00041513	0.0543896	glutaminase domain-containing protein			35.1	not assigned.annotated	NP_001234039.2
Solyc03g025670	6.14439	3.18638	0.000425247	0.0555117	PAR1 protein			35.2	not assigned.not annotated	XP_004234399.1
Solyc08g066530	-2.59014	-1.52167	0.000430417	0.0559823	Acid phosphatase 1			35.1	not assigned.annotated	XP_004245159.1
Solyc03g007030	-2.93723	0.714253	0.000434482	0.0563064	CDGSH iron-sulfur domain-containing protein	GO:0043231|GO:0051537	intracellular membrane-bounded organelle | 2 iron, 2 sulfur cluster binding	35.1	not assigned.annotated	NP_001309349.1
Solyc07g049690	-1.36127	6.74306	0.000449829	0.0580848	hydroperoxide lyase	GO:0005506|GO:0016705|GO:0020037|GO:0055114	iron ion binding | oxidoreductase activity, acting on paired donors, with incorporation or reduction of molecular oxygen | heme binding | oxidation-reduction process	35.1	not assigned.annotated	NP_001234420.2
Solyc05g050550	-6.96644	-2.58369	0.000451696	0.058116	DUF688 family protein			35.2	not assigned.not annotated	XP_004240072.1
Solyc04g082290	-1.41043	3.52664	0.000465999	0.0597414	At1g76250			3.2.3.1.3	Carbohydrate metabolism.starch metabolism.degradation.phosphorylation.dikinase regulator (ESV1)	XP_004238417.1
Solyc07g052470	2.05921	0.296362	0.000472065	0.0603029	Syntaxin, putative	GO:0016020|GO:0016192	membrane | vesicle-mediated transport	5.7.3.6.3 | 22.7.1.1	Lipid metabolism.lipid degradation.fatty acid degradation.glyoxylate cycle.isocitrate lyase | Vesicle trafficking.SNARE target membrane recognition and fusion complexes.Qa-type SNARE components.SYP1-group component	XP_010323814.1
Solyc07g009530	4.85488	10.273	0.000482418	0.0614061	Chitinase	GO:0008061	chitin binding	21.1.2	Cell wall organisation.cellulose.cellulose-hemicellulose network assembly	XP_004248635.1	AT3G12500.1
Solyc09g014940	-5.16506	-0.898119	0.000492304	0.0624423	Wound-induced protein 1			35.2	not assigned.not annotated	XP_004246826.1
Solyc12g036860	-5.87318	-2.37097	0.000494477	0.0624964	Retrotransposon protein			35.2	not assigned.not annotated	XP_004240177.1
Solyc01g007100	-1.37237	3.82582	0.000499077	0.0628556	Digalactosyldiacylglycerol synthase 1			5.3.3	Lipid metabolism.galactolipid and sulfolipid biosynthesis.digalactosyldiacylglycerol synthase (DGD)	XP_004228603.1
Solyc01g079170	2.90177	2.21383	0.000513755	0.0642517	Hexosyltransferase	GO:0016757	transferase activity, transferring glycosyl groups	3.4.1	Carbohydrate metabolism.oligosaccharide metabolism.galactinol synthase	XP_004229370.1
Solyc04g071800	-2.60389	6.0232	0.000513524	0.0642517	Cytochrome P450	GO:0016705|GO:0055114	oxidoreductase activity, acting on paired donors, with incorporation or reduction of molecular oxygen | oxidation-reduction process	50.1.13	Enzyme classification.EC_1 oxidoreductases.EC_1.14 oxidoreductase acting on paired donor with incorporation or reduction of molecular oxygen	XP_004237820.1
Solyc02g082920	5.18006	7.14702	0.000525087	0.0654402	acidic extracellular 26 kD chitinase	GO:0004568|GO:0006032|GO:0016998	chitinase activity | chitin catabolic process | cell wall macromolecule catabolic process	35.1	not assigned.annotated	NP_001234404.1
Solyc04g040130	5.81188	3.69339	0.000529219	0.0657261	Fatty acid desaturase	GO:0016717|GO:0055114	oxidoreductase activity, acting on paired donors, with oxidation of a pair of donors resulting in the reduction of molecular oxygen to two molecules of water | oxidation-reduction process	5.1.7.3	Lipid metabolism.fatty acid biosynthesis.fatty acid desaturation.omega-3/omega-6 fatty acid desaturase (FAD2/3/6-8)	XP_025886451.1	AT3G12120.1
Solyc01g100000	-1.03716	5.86395	0.000535628	0.0662919	F-box protein	GO:0005515	protein binding	35.1	not assigned.annotated	XP_004230266.1
Solyc02g079170	2.10214	5.74799	0.000543963	0.0670913	External alternative NAD(P)H-ubiquinone oxidoreductase B2, mitochondrial	GO:0016491|GO:0055114	oxidoreductase activity | oxidation-reduction process	2.4.2.1.2	Cellular respiration.oxidative phosphorylation.alternative NAD(P)H dehydrogenase activities.type-II NAD(P)H dehydrogenase activities.NAD(P)H dehydrogenase (NDB)	XP_004232796.1
Solyc04g074640	-2.66995	2.07608	0.00055183	0.0678277	Ascorbate peroxidase	GO:0004601|GO:0006979|GO:0020037|GO:0055114	peroxidase activity | response to oxidative stress | heme binding | oxidation-reduction process	10.4.1.1	Redox homeostasis.hydrogen peroxide removal.ascorbate-glutathione cycle.ascorbate peroxidase (APX)	XP_004237942.1
Solyc10g076290	1.38059	3.28961	0.000562575	0.0689116	F-box/LRR protein	GO:0005515	protein binding	35.1	not assigned.annotated	XP_004249058.1
Solyc06g035560	-5.83155	-0.890775	0.000590785	0.0719229	MADS-box transcription factor	GO:0003677|GO:0046983	DNA binding | protein dimerization activity	15.5.14	RNA biosynthesis.transcriptional regulation.transcription factor (MADS/AGL)	XP_019069748.1
Solyc08g067610	5.42918	3.51121	0.00059118	0.0719229	Pleiotropic drug resistance ABC transporter	GO:0016020	membrane	24.1.3.2.2	Solute transport.primary active transport.ABC superfamily.ABC2 family.subfamily ABCG transporter	XP_004245224.1
Solyc03g121600	-2.86659	0.908862	0.000605445	0.0734086	Glucose-methanol-choline (GMC) oxidoreductase family protein	GO:0016614|GO:0055114	oxidoreductase activity, acting on CH-OH group of donors | oxidation-reduction process	21.9.1.4	Cell wall organisation.cutin and suberin.cuticular lipid formation.omega-hydroxy fatty acyl dehydrogenase	XP_004236390.1
Solyc05g021550	3.64213	-1.64056	0.000611587	0.0736541	Sister-chromatide cohesion protein 3			35.2	not assigned.not annotated	XP_025886976.1
Solyc11g067270	-5.3958	-0.278876	0.000609725	0.0736541	Acylsugar acyltransferase 3	GO:0016747	transferase activity, transferring acyl groups other than amino-acyl groups	50.2.3	Enzyme classification.EC_2 transferases.EC_2.3 acyltransferase	XP_004251378.4	AT3G26040.1
Solyc03g045070	-3.56004	1.02993	0.000643217	0.0770897	ammonium transporter AF118858	GO:0008519|GO:0016020|GO:0072488	ammonium transmembrane transporter activity | membrane | ammonium transmembrane transport	24.3.4.1	Solute transport.channels.AMT family.ammonium transporter (AMT1)	NP_001234216.1	AT4G13510.1
Solyc11g009010	1.15164	4.64632	0.000644426	0.0770897	alpha/beta-Hydrolases superfamily protein			35.2	not assigned.not annotated	XP_004248797.1
Solyc09g042710	-1.32503	3.38989	0.000649355	0.0774204	weak chloroplast movement under blue light protein (DUF827)			35.1	not assigned.annotated	XP_004246982.1
Solyc01g007960	5.83354	0.105201	0.000659825	0.0784074	Kinase family protein	GO:0005524	ATP binding	18.4.1.17	Protein modification.phosphorylation.TKL protein kinase superfamily.protein kinase (DUF26)	XP_004228898.1
Solyc02g082670	1.49642	6.29968	0.000674707	0.0796466	WUSCHEL-related homeobox 8	GO:0003677	DNA binding	15.5.3.6	RNA biosynthesis.transcriptional regulation.Homeobox transcription factor superfamily.transcription factor (WOX)	NP_001335376.1
Solyc02g086310	-2.79334	2.69833	0.000673309	0.0796466	lipid-transfer protein 7k-LTP	GO:0006869	lipid transport	35.1	not assigned.annotated	NP_001306883.1	AT3G18280.1
Solyc04g072370	7.56682	-2.28418	0.000677685	0.079735	Bidirectional sugar transporter SWEET			35.2	not assigned.not annotated	XP_004247459.1
Solyc01g106460	-5.64275	-0.902776	0.000699861	0.0820741	bHLH transcription factor 007	GO:0046983	protein dimerization activity	15.5.32 | 25.4.1.7	RNA biosynthesis.transcriptional regulation.transcription factor (bHLH) | Nutrient uptake.iron uptake.regulation.bHLH-IVa-class iron homeostasis regulator	XP_004230658.1
Solyc09g075710	-5.27095	-2.60374	0.000735272	0.0859451	Alpha/beta-Hydrolases superfamily protein	GO:0008152|GO:0016787	metabolic process | hydrolase activity	35.1	not assigned.annotated	NP_001316334.1	AT3G48700.1
Solyc02g031940	1.72296	3.80821	0.000741955	0.0861632	Pathogen-like protein			35.2	not assigned.not annotated	XP_004231588.1
Solyc07g048100	-2.79939	0.957798	0.000739612	0.0861632	BRCT domain-containing protein			35.1	not assigned.annotated	XP_010323866.1
Solyc08g007230	-2.01106	1.89319	0.000745239	0.0862644	Ethylene-responsive transcription factor	GO:0003700|GO:0006355	DNA-binding transcription factor activity | regulation of transcription, DNA-templated	15.5.7.1	RNA biosynthesis.transcriptional regulation.AP2/ERF transcription factor superfamily.transcription factor (ERF)	XP_004244707.2
Solyc11g006300	-4.86672	-0.288484	0.000754179	0.0870176	3-oxo-5-alpha-steroid 4-dehydrogenase family protein	GO:0005737|GO:0006629|GO:0016021|GO:0016627	cytoplasm | lipid metabolic process | integral component of membrane | oxidoreductase activity, acting on the CH-CH group of donors	50.1.3	Enzyme classification.EC_1 oxidoreductases.EC_1.3 oxidoreductase acting on CH-CH group of donor	XP_004249926.1
Solyc06g068060	1.00071	5.72416	0.000763619	0.0878236	Sister chromatid cohesion protein PDS5 like B-B			13.3.5.3.2	Cell cycle organisation.mitosis and meiosis.sister chromatid separation.cohesin establishment.cohesin cofactor (PDS5)	XP_025887394.1
Solyc00g010755	-4.45443	-2.03165	0.00077025	0.0883022	D-alanine-D-alanine ligase	GO:0005524	ATP binding	35.2	not assigned.not annotated	XP_019071155.1
Solyc03g112030	4.87026	2.91291	0.000774904	0.0885519	Cytochrome P450	GO:0016705|GO:0055114	oxidoreductase activity, acting on paired donors, with incorporation or reduction of molecular oxygen | oxidation-reduction process	50.1.13	Enzyme classification.EC_1 oxidoreductases.EC_1.14 oxidoreductase acting on paired donor with incorporation or reduction of molecular oxygen	XP_019068571.1
Solyc04g051025	5.91646	-3.018	0.000804988	0.0916968	L18 ribosomal protein Heart Stopper	GO:0003735|GO:0005622|GO:0005840|GO:0006412	structural constituent of ribosome | intracellular | ribosome | translation	35.2	not assigned.not annotated	XP_004237376.1
Solyc04g072760	-6.2244	-0.855577	0.000831563	0.0942747	Sulfate transporter	GO:0008272|GO:0015116|GO:0016021	sulfate transport | sulfate transmembrane transporter activity | integral component of membrane	24.2.3.1.1	Solute transport.carrier-mediated transport.APC superfamily.SulP family.sulfate transporter (SULTR)	XP_004237882.1
Solyc10g048050	6.11417	-2.69293	0.00083289	0.0942747	LOW QUALITY:Developmentally-regulated GTP-binding protein			35.1	not assigned.annotated	XP_004235570.1	AT1G17470.1
Solyc06g008065	-6.81992	-2.54261	0.000836978	0.0944385	cullin 1	GO:0006511|GO:0031625	ubiquitin-dependent protein catabolic process | ubiquitin protein ligase binding	35.1	not assigned.annotated	XP_004242315.1
Solyc06g065620	-5.05078	-2.12499	0.00084524	0.0950709	probable protein phosphatase 2C			13.3.6.2.1.2	Cell cycle organisation.mitosis and meiosis.meiotic recombination.meiotic double strand break initiation.meiotic topoisomerase-VI complex.component b/MTOP6b	XP_010322745.1
Solyc09g018750	-0.97233	7.59001	0.000855296	0.0959004	CBS domain-containing protein			35.1	not assigned.annotated	NP_001294933.1
Solyc09g055320	2.89158	1.2732	0.000870079	0.0969502	LOW QUALITY:Oxygen-evolving enhancer protein 2, chloroplastic			35.2	not assigned.not annotated	XP_004235944.1
Solyc10g009570	-1.39086	4.61131	0.000867528	0.0969502	thylakoid rhodanese-like protein	GO:0008152|GO:0008410	metabolic process | CoA-transferase activity	1.1.5.2.2.1	Photosynthesis.photophosphorylation.linear electron flow.ferredoxin-NADP reductase (FNR) activity.FNR membrane-tethering.FNR-recruitment protein (TROL)	XP_004248078.3
Solyc02g070980	-3.87142	0.301856	0.000881248	0.0978897	Chlorophyll a-b binding protein, chloroplastic	GO:0009765|GO:0016020	photosynthesis, light harvesting | membrane	1.1.1.1.1	Photosynthesis.photophosphorylation.photosystem II.LHC-II complex.component LHCb1/2/3	NP_001316869.1	AT1G29930.1
Solyc10g083290	5.94765	2.93644	0.000899691	0.0993215	symbol=Lin6	GO:0004553|GO:0005975	hydrolase activity, hydrolyzing O-glycosyl compounds | carbohydrate metabolic process	3.1.4.1.1	Carbohydrate metabolism.sucrose metabolism.degradation.invertase activities.acid beta-fructofuranosidase (CWIN)	NP_001233842.2
Solyc12g008500	3.48077	2.39909	0.000897574	0.0993215	Receptor-like protein kinase	GO:0005524	ATP binding	18.4.1.15	Protein modification.phosphorylation.TKL protein kinase superfamily.protein kinase (LRR-XV)	XP_004251639.1
Solyc03g070440	-4.56426	-2.51293	0.000905604	0.0994427	COBRA-like protein	GO:0010215|GO:0016049|GO:0031225	cellulose microfibril organization | cell growth | anchored component of membrane	21.1.2.2	Cell wall organisation.cellulose.cellulose-hemicellulose network assembly.regulatory protein (COB)	XP_019068399.1
Solyc11g068940	8.12135	0.539277	0.00090635	0.0994427	U-box domain-containing family protein	GO:0005488	binding	35.1	not assigned.annotated	XP_004251097.1	AT3G11840.1
Solyc12g044280	-2.6036	1.86035	0.000937725	0.102571	Photosystem I reaction center subunit VI	GO:0009522|GO:0009538|GO:0015979	photosystem I | photosystem I reaction center | photosynthesis	1.1.4.2.8	Photosynthesis.photophosphorylation.photosystem I.PS-I complex.component PsaH	NP_001308141.1
Solyc10g050880	7.9119	1.79587	0.000945295	0.103083	Alpha/beta-Hydrolases superfamily protein, putative	GO:0008152|GO:0016787	metabolic process | hydrolase activity	35.1	not assigned.annotated	XP_004248737.1	AT3G48700.1
Solyc02g084850	-2.49236	2.35956	0.000970734	0.105216	Abscisic acid and environmental stress-inducible protein TAS14	GO:0006950|GO:0009415	response to stress | response to water	26.5	External stimuli response.drought	NP_001234038.1
Solyc11g005290	-7.25763	-2.52774	0.000967802	0.105216	RING/U-box superfamily protein	GO:0005515|GO:0008270	protein binding | zinc ion binding	35.1	not assigned.annotated	XP_004250440.1	AT1G49230.1
Solyc02g070950	-3.08722	0.819866	0.000989877	0.106967	Chlorophyll a-b binding protein, chloroplastic	GO:0009765|GO:0016020	photosynthesis, light harvesting | membrane	1.1.1.1.1	Photosynthesis.photophosphorylation.photosystem II.LHC-II complex.component LHCb1/2/3	NP_001333218.1	AT1G29930.1
Solyc02g084810	-0.961554	4.60748	0.000993705	0.107057	AT4G36440-like protein			35.2	not assigned.not annotated	XP_010316391.1
Solyc03g053130	3.29811	0.285566	0.00102114	0.109323	Strictosidine synthase family protein	GO:0009058|GO:0016844	biosynthetic process | strictosidine synthase activity	50.4.3	Enzyme classification.EC_4 lyases.EC_4.3 carbon-nitrogen lyase	XP_004234762.1
Solyc07g009050	4.66846	0.972926	0.00102391	0.109323	Defensin-like protein, putative	GO:0006952	defense response	26.8	External stimuli response.pathogen	XP_004242838.1
Solyc12g039100	3.51751	0.148583	0.00102074	0.109323	ACT domain-containing protein			35.2	not assigned.not annotated	XP_010324799.1	AT1G69040.2
Solyc03g111610	-1.76483	2.55703	0.00102733	0.109361	Haloacid dehalogenase-like hydrolase (HAD) superfamily protein	GO:0008152|GO:0016787	metabolic process | hydrolase activity	1.2.1.3.3	Photosynthesis.calvin cycle.ribulose-1,5-bisphosphat carboxylase/oxygenase (RuBisCo) activity.RuBisCo regulation.xylulose-1,5-bisphosphate phosphatase (CbbY)	XP_004236312.1
Solyc06g084370	1.99305	3.74838	0.0010324	0.109576	LOW QUALITY:sodium hydrogen exchanger 4			35.2	not assigned.not annotated	XP_004240531.1
Solyc05g052390	-4.4027	-0.144075	0.00103933	0.109984	Laccase	GO:0055114	oxidation-reduction process	50.1.10	Enzyme classification.EC_1 oxidoreductases.EC_1.10 oxidoreductase acting on diphenol or related substance as donor	XP_004239958.1
Solyc07g052930	3.01943	-0.713381	0.00108539	0.114519	bHLH transcription factor141	GO:0046983	protein dimerization activity	15.5.32	RNA biosynthesis.transcriptional regulation.transcription factor (bHLH)	XP_019070343.1
Solyc04g076440	7.5108	-2.11882	0.00109526	0.115221	LOW QUALITY:Tetratricopeptide repeat-like superfamily protein			35.2	not assigned.not annotated	XP_004244494.1
Solyc09g082690	-2.00284	5.87522	0.00110606	0.116017	superoxide dismutase			1.1.1.6.2.1	Photosynthesis.photophosphorylation.photosystem II.LHC-related protein groups.three-helix LHC-related protein group.protein (ELIP)	NP_001307185.1
Solyc11g017460	1.05172	5.45732	0.00111068	0.11616	U-box domain-containing protein 13	GO:0005515	protein binding	21.1.1.4.2	Cell wall organisation.cellulose.cellulose synthase complex (CSC).microtubule-dependent CSC insertion.regulatory protein (CSI)	XP_010312839.1
Solyc07g066610	-0.976127	7.39901	0.00111446	0.116215	phosphoglycerate kinase	GO:0004618|GO:0006096	phosphoglycerate kinase activity | glycolytic process	1.2.2 | 2.1.1.5 | 3.12.5	Photosynthesis.calvin cycle.phosphoglycerate kinase | Cellular respiration.glycolysis.cytosolic glycolysis.phosphoglycerate kinase | Carbohydrate metabolism.plastidial glycolysis.phosphoglycerate kinase	XP_004243968.1
Solyc09g075020	3.03091	6.24106	0.00111771	0.116216	Multidrug resistance protein ABC transporter family protein	GO:0005524|GO:0016887	ATP binding | ATPase activity	24.1.3.1.2	Solute transport.primary active transport.ABC superfamily.ABC1 family.subfamily ABCC transporter	XP_025888545.1
Solyc03g006970	-2.72287	0.893641	0.0011322	0.117381	serine protease SBT2	GO:0004252|GO:0006508	serine-type endopeptidase activity | proteolysis	19.4.2.1.1	Protein homeostasis.proteolysis.serine-type peptidase activities.S8-class protease (subtilisin) families.protease (SBT1)	NP_001234288.1	AT5G51750.1
Solyc07g044820	-6.06586	-3.17501	0.00113552	0.117386	LOW QUALITY:Hexosyltransferase	GO:0006486|GO:0008378|GO:0016020	protein glycosylation | galactosyltransferase activity | membrane	35.2	not assigned.not annotated	XP_004243885.2	AT5G57500.1
Solyc01g090350	-2.80582	0.400427	0.00114496	0.117891	non-specific lipid-transfer protein	GO:0006869|GO:0008289	lipid transport | lipid binding	35.1	not assigned.annotated	NP_001316121.1
Solyc02g086980	-2.59369	0.955746	0.001147	0.117891	LOW QUALITY:Trimeric LpxA-like enzymes superfamily protein			24.3.2.4	Solute transport.channels.VIC superfamily.cyclic nucleotide-gated cation channel (CNGC)	XP_004228809.1
Solyc10g083610	1.00923	5.56038	0.0011574	0.118618	ethylene-inducible CTR1-like protein kinase	GO:0005524	ATP binding	11.5.2.2 | 17.1.2.2.1.11.1 | 18.4.1.30	Phytohormone action.ethylene.perception and signal transduction.protein kinase (CTR1) | Protein biosynthesis.ribosome biogenesis.large ribosomal subunit (LSU).LSU processome.pre-60S ribosomal subunit nuclear assembly.ARPF2-ARRS1 assembly complex.component ARPF2 | Protein modification.phosphorylation.TKL protein kinase superfamily.protein kinase (MAP3K-RAF)	XP_010327687.1
Solyc12g009930	-2.52095	3.0014	0.00116491	0.119047	Glycosyltransferase	GO:0008152|GO:0016758	metabolic process | transferase activity, transferring hexosyl groups	11.4.3.1	Phytohormone action.cytokinin.conjugation and degradation.UDP-dependent glycosyl transferase	XP_004251744.1
Solyc09g008320	-1.62163	4.17882	0.00118933	0.121197	Xyloglucan endotransglucosylase/hydrolase	GO:0010411|GO:0016762|GO:0042546	xyloglucan metabolic process | xyloglucan:xyloglucosyl transferase activity | cell wall biogenesis	21.2.1.2.6	Cell wall organisation.hemicellulose.xyloglucan.modification and degradation.xyloglucan endotransglucosylase/hydrolase	XP_004246615.1
Solyc02g021660	6.60886	-2.80927	0.00120702	0.12265	Kinase, putative	GO:0004672|GO:0006468	protein kinase activity | protein phosphorylation	50.2.7	Enzyme classification.EC_2 transferases.EC_2.7 transferase transferring phosphorus-containing group	XP_019067666.1
Solyc05g010240	-1.8581	0.643815	0.00124055	0.1257	Chaperonin-60 beta subunit	GO:0005737|GO:0042026	cytoplasm | protein refolding	1.1.8.1.6.2.2 | 1.2.1.2.1.2 | 19.1.7.1	Photosynthesis.photophosphorylation.chlororespiration.NADH dehydrogenase-like (NDH) complex.assembly and stabilization.Cpn60 chaperonin heterodimer.subunit beta | Photosynthesis.calvin cycle.ribulose-1,5-bisphosphat carboxylase/oxygenase (RuBisCo) activity.RuBisCo assembly.CPN60 assembly chaperone complex.component CPN60b | Protein homeostasis.protein quality control.Hsp60 chaperone system.chaper…	XP_010320801.1
Solyc12g089300	1.62502	6.02846	0.00126153	0.127465	Gibberellin-regulated protein 2			11.10.2.1.1	Phytohormone action.signalling peptides.CRP (cysteine-rich-peptide) category.GASA/GAST-peptide activity.GASA-precursor polypeptide	XP_010314649.1
Solyc02g087910	-4.11864	-0.311845	0.00128278	0.129247	Non-specific lipid-transfer protein	GO:0006869|GO:0008289	lipid transport | lipid binding	35.1	not assigned.annotated	XP_004233683.1
Solyc09g092580	-4.85063	-1.9297	0.00129994	0.130608	Cytochrome P450, putative	GO:0016705|GO:0055114	oxidoreductase activity, acting on paired donors, with incorporation or reduction of molecular oxygen | oxidation-reduction process	50.1.13	Enzyme classification.EC_1 oxidoreductases.EC_1.14 oxidoreductase acting on paired donor with incorporation or reduction of molecular oxygen	XP_004247901.1
Solyc02g076690	-1.35158	5.50997	0.00130814	0.131063	Cysteine protease	GO:0008234	cysteine-type peptidase activity	50.3.4 | 19.4.1	Enzyme classification.EC_3 hydrolases.EC_3.4 hydrolase acting on peptide bond (peptidase) | Protein homeostasis.proteolysis.cysteine-type peptidase activities	XP_004233043.1
Solyc02g082930	4.11531	5.2262	0.00131715	0.131597	acidic extracellular 27 kD chitinase	GO:0004568|GO:0006032|GO:0016998	chitinase activity | chitin catabolic process | cell wall macromolecule catabolic process	35.1	not assigned.annotated	NP_001234400.1
Solyc04g008210	1.33002	4.08445	0.00133761	0.133269	ETAG-A3	GO:0010411|GO:0016762|GO:0042546	xyloglucan metabolic process | xyloglucan:xyloglucosyl transferase activity | cell wall biogenesis	50.2.4	Enzyme classification.EC_2 transferases.EC_2.4 glycosyltransferase	NP_001296719.1
Solyc05g015460	2.62059	1.40459	0.00135459	0.134586	F-box family protein			35.2	not assigned.not annotated	XP_025886916.1
Solyc09g018010	-3.11941	2.54984	0.0014058	0.139287	Non-specific lipid-transfer protein	GO:0006869|GO:0008289	lipid transport | lipid binding	35.1	not assigned.annotated	XP_004246276.1
Solyc03g006010	1.7507	5.54821	0.00143132	0.141034	calcium/calcium/calmodulin-dependent Serine/Threonine-kinase			35.2	not assigned.not annotated	XP_004234077.1
Solyc08g079800	-6.42264	-2.98341	0.0014294	0.141034	Growth-regulating factor	GO:0005634|GO:0006351|GO:0032502	nucleus | transcription, DNA-templated | developmental process	15.5.52.1	RNA biosynthesis.transcriptional regulation.GRF-GIF transcription factor complex.component GRF	XP_004246135.1
Solyc01g106920	-4.66496	-2.20233	0.00144994	0.142477	Nucleobase-ascorbate transporter-like protein	GO:0005215|GO:0006810|GO:0016020|GO:0055085	transporter activity | transport | membrane | transmembrane transport	24.2.3.3.2	Solute transport.carrier-mediated transport.APC superfamily.NCS-2 family.solute transporter (NAT)	XP_025884040.1
Solyc02g071000	-4.81553	-0.910736	0.00147445	0.1437	Chlorophyll a-b binding protein, chloroplastic	GO:0009765|GO:0016020	photosynthesis, light harvesting | membrane	1.1.1.1.1	Photosynthesis.photophosphorylation.photosystem II.LHC-II complex.component LHCb1/2/3	NP_001333706.1	AT1G29930.1
Solyc07g014680	-6.56839	-2.958	0.0014665	0.1437	sodium transporter HKT1,2	GO:0006812|GO:0008324|GO:0055085	cation transport | cation transmembrane transporter activity | transmembrane transport	24.2.20	Solute transport.carrier-mediated transport.potassium/sodium cation transporter (HKT)	NP_001289833.1
Solyc07g047850	-1.75422	5.0265	0.00147082	0.1437	Chlorophyll a-b binding protein, chloroplastic	GO:0009765|GO:0016020	photosynthesis, light harvesting | membrane	1.1.1.1.1	Photosynthesis.photophosphorylation.photosystem II.LHC-II complex.component LHCb1/2/3	NP_001234739.1
Solyc02g062960	-7.95026	-2.09695	0.00152466	0.146798	Homeobox-leucine zipper family protein	GO:0006355|GO:0043565	regulation of transcription, DNA-templated | sequence-specific DNA binding	15.5.3.1	RNA biosynthesis.transcriptional regulation.Homeobox transcription factor superfamily.transcription factor (HD-ZIP I/II)	XP_004233508.1
Solyc03g043850	1.24273	6.48567	0.0015336	0.146798	cytochrome c oxidase-like protein	GO:0004129|GO:0005743|GO:0005751	cytochrome-c oxidase activity | mitochondrial inner membrane | mitochondrial respiratory chain complex IV	2.4.5.1.6	Cellular respiration.oxidative phosphorylation.cytochrome c oxidase complex.core components.component COX6a	XP_004234642.1
Solyc04g015480	-1.0467	5.9456	0.00153115	0.146798	BTB/POZ domain-containing protein TNFAIP1 isoform 2			35.2	not assigned.not annotated	NP_001294941.1
Solyc04g081970	-1.00367	6.14302	0.00151034	0.146798	Thioredoxin	GO:0045454	cell redox homeostasis	35.1	not assigned.annotated	XP_004238392.1
Solyc07g054210	-1.12056	6.28085	0.00152196	0.146798	light dependent NADH:protochlorophyllide oxidoreductase 2	GO:0016630|GO:0055114	protochlorophyllide reductase activity | oxidation-reduction process	7.12.6.5.1	Coenzyme metabolism.tetrapyrrol biosynthesis.chlorophyll metabolism.protochlorophyllide oxidoreductase (POR) activities.light-dependent POR	NP_001296970.1
Solyc07g054670	1.60479	2.88475	0.00153496	0.146798	External alternative NAD(P)H-ubiquinone oxidoreductase B2, mitochondrial	GO:0016491|GO:0055114	oxidoreductase activity | oxidation-reduction process	2.4.2.1.2	Cellular respiration.oxidative phosphorylation.alternative NAD(P)H dehydrogenase activities.type-II NAD(P)H dehydrogenase activities.NAD(P)H dehydrogenase (NDB)	XP_004243314.1
Solyc10g005740	3.46178	-0.81774	0.00152546	0.146798	Sec14p-like phosphatidylinositol transfer family protein			35.1	not assigned.annotated	XP_010327217.1
Solyc01g068560	-1.49833	1.92278	0.00154436	0.147101	Agglutinin-like protein ALA1, putative isoform 3			35.2	not assigned.not annotated	XP_025886607.1
Solyc01g098820	-2.76432	0.33091	0.00154635	0.147101	Phototropic-responsive NPH3 family protein, putative	GO:0005515	protein binding	35.1	not assigned.annotated	XP_004231266.1
Solyc08g007130	-2.56075	1.43822	0.00155234	0.147279	Beta-amylase	GO:0005975	carbohydrate metabolic process	3.2.3.3.1.2	Carbohydrate metabolism.starch metabolism.degradation.hydrolysis and phosphorolysis.amylase activities.beta amylase	XP_004244551.1
Solyc08g082460	6.84215	-1.01719	0.00156254	0.147855	Kinase	GO:0004672|GO:0006468	protein kinase activity | protein phosphorylation	50.2.7 | 18.4	Enzyme classification.EC_2 transferases.EC_2.7 transferase transferring phosphorus-containing group | Protein modification.phosphorylation	XP_004246095.1
Solyc01g106170	4.32395	-1.57341	0.00158648	0.149329	AGAMOUS-like MADS-box transcription factor	GO:0003677|GO:0046983	DNA binding | protein dimerization activity	15.5.14	RNA biosynthesis.transcriptional regulation.transcription factor (MADS/AGL)	XP_019067399.1
Solyc03g006600	4.89707	-2.16148	0.00158232	0.149329	LOW QUALITY:P-loop containing nucleoside triphosphate hydrolases superfamily protein			35.2	not assigned.not annotated	XP_010317516.1	AT1G11125.1
Solyc10g082020	7.0179	-0.624707	0.00159269	0.14952	Cytokinin riboside 5'-monophosphate phosphoribohydrolase			11.4.1.2	Phytohormone action.cytokinin.biosynthesis.cytokinin phosphoribohydrolase	NP_001244910.1
Solyc09g005770	-4.74209	-1.56213	0.00161595	0.151307	F-box family protein, putative	GO:0005515	protein binding	19.2.2.8.1.4.6	Protein homeostasis.ubiquitin-proteasome system.ubiquitin-fold protein conjugation.Cullin-based ubiquitylation complexes.SKP1-CUL1-FBX (SCF) E3 ligase complexes.F-BOX substrate adaptor components.component FBX	XP_004246931.1	AT1G50870.1
Solyc02g092415	-6.19779	-3.13586	0.00162062	0.151348	LOW QUALITY:LINE-1 reverse transcriptase isogeny			35.2	not assigned.not annotated	XP_010327536.1
Solyc06g068240	1.26285	3.64812	0.00163356	0.152159	Pyrophosphate-energized vacuolar membrane proton pump	GO:0004427|GO:0009678|GO:0015992|GO:0016020	inorganic diphosphatase activity | pyrophosphate hydrolysis-driven proton transmembrane transporter activity | membrane	24.1.4.1	Solute transport.primary active transport.VHP PPase family.proton-translocating pyrophosphatase (VHP1)	XP_004241690.1
Solyc04g078560	-6.49706	-2.71589	0.00164771	0.153078	Leucine-rich repeat receptor-like protein kinase family			35.1	not assigned.annotated	XP_019069223.1	AT4G06744.1
Solyc03g098480	2.51179	3.92298	0.00165645	0.153492	LOW QUALITY:cotton fiber (DUF761)			35.2	not assigned.not annotated	XP_004235399.1
Solyc07g005410	2.58645	0.456828	0.00166388	0.153782	Cytochrome C oxidase, subunit VIb family protein	GO:0004129|GO:0005739	cytochrome-c oxidase activity | mitochondrion	35.2	not assigned.not annotated	XP_004242578.1
Solyc12g010670	5.33406	0.962356	0.00167981	0.154854	RING/U-box superfamily protein	GO:0046872	metal ion binding	19.2.2.1.5.3.2	Protein homeostasis.ubiquitin-proteasome system.ubiquitin-fold protein conjugation.ubiquitin conjugation (ubiquitylation).ubiquitin-ligase E3 activities.RING-domain E3 ligase activities.RING-HC-class E3 ligase	XP_004251789.1	AT4G27470.1
Solyc06g068480	-1.09817	4.19631	0.00171195	0.157412	Low PSII Accumulation 3 isoform 3			1.1.1.3.3	Photosynthesis.photophosphorylation.photosystem II.assembly and maintenance.assembly factor (LPA3)	XP_004241678.1
Solyc05g013710	2.02779	3.78476	0.00173897	0.159486	Quinolinate synthase A			7.11.1.1.2.3	Coenzyme metabolism.iron-sulfur cluster assembly machinery.plastidial SUF system.assembly phase.SUF-SE sulfur transfer complex.component SUF-E2/-E3	XP_010320941.1
Solyc05g009270	-4.47784	0.0801147	0.00174682	0.159796	3-ketoacyl-CoA synthase	GO:0006633|GO:0016020|GO:0016747	fatty acid biosynthetic process | membrane | transferase activity, transferring acyl groups other than amino-acyl groups	5.1.6.1.1	Lipid metabolism.fatty acid biosynthesis.endoplasmic reticulum-localized fatty acid elongase (FAE) system.fatty acid elongation complex.3-ketoacyl-CoA synthase (KCS)	XP_004238922.1
Solyc07g062160	-0.862978	5.47432	0.00176613	0.16115	Zinc finger, B-box	GO:0005622|GO:0008270	intracellular | zinc ion binding	15.5.1.1	RNA biosynthesis.transcriptional regulation.C2C2 transcription factor superfamily.transcription factor (BBX-DBB)	XP_004244294.1
Solyc02g075615	-0.978403	4.60628	0.00180291	0.163671	LOW QUALITY:Golgin candidate 6	GO:0005737|GO:0006886|GO:0008565|GO:0016020	cytoplasm | intracellular protein transport | obsolete protein transporter activity | membrane	22.6.7.7	Vesicle trafficking.target membrane tethering.Golgi membrane tethering factors.golgin (GC6)	XP_010316822.1
Solyc02g084990	-1.08115	5.25299	0.00180287	0.163671	Mannan endo-1,4-beta-mannosidase-like protein	GO:0005975	carbohydrate metabolic process	21.2.3.2.2	Cell wall organisation.hemicellulose.heteromannan.modification and degradation.endo-beta-1,4-mannanase	XP_004232427.1
Solyc01g066040	-4.1668	-0.530144	0.0018194	0.164176	LOW QUALITY:WD40 domain-containing protein			35.2	not assigned.not annotated	XP_004238364.1
Solyc05g050010	2.00291	7.4093	0.00182224	0.164176	1-aminocyclopropane-1-carboxylic acid synthase-4	GO:0009058|GO:0030170	biosynthetic process | pyridoxal phosphate binding	11.5.1.1	Phytohormone action.ethylene.biosynthesis.1-aminocyclopropane-1-carboxylate (ACC) synthase	NP_001234280.1
Solyc10g085270	2.95871	-0.533065	0.00181663	0.164176	LOW QUALITY:DNA-directed RNA polymerase subunit beta''			35.2	not assigned.not annotated	XP_004236142.1
Solyc12g077630	2.95263	-1.68833	0.00183354	0.164779	LOW QUALITY:NAD(P)-binding Rossmann-fold superfamily protein			35.2	not assigned.not annotated	XP_004238520.1
Solyc01g008710	-4.27517	10.1427	0.00184752	0.165205	inactive endo-beta-mannanase	GO:0005975	carbohydrate metabolic process	21.2.3.2.2	Cell wall organisation.hemicellulose.heteromannan.modification and degradation.endo-beta-1,4-mannanase	NP_001234131.1
Solyc11g007430	6.64933	-0.850016	0.00184494	0.165205	Receptor-like protein kinase	GO:0030247	polysaccharide binding	35.2	not assigned.not annotated	XP_025883938.1
Solyc12g013830	5.94392	1.18605	0.00189224	0.168782	Metallothionein			35.2	not assigned.not annotated	XP_004239146.1
Solyc03g117660	-1.22052	3.14065	0.00190747	0.169718	RING/U-box superfamily protein	GO:0005515|GO:0008270	protein binding | zinc ion binding	35.2	not assigned.not annotated	XP_019068680.1
Solyc09g061890	3.71983	1.33226	0.0019261	0.170949	Pectate lyase			21.3.5.2	Cell wall organisation.pectin.modification and degradation.pectate lyase	XP_004247105.1
Solyc05g005380	-6.75264	-2.84698	0.00196286	0.173352	Transcription factor	GO:0046982	protein heterodimerization activity	15.5.51.2	RNA biosynthesis.transcriptional regulation.NF-Y transcription factor complex.component NF-YB	XP_010320573.1
Solyc12g009440	-1.0733	6.07486	0.00196071	0.173352	Chaperone DnaJ	GO:0031072|GO:0051082	heat shock protein binding | unfolded protein binding	1.2.1.2.7	Photosynthesis.calvin cycle.ribulose-1,5-bisphosphat carboxylase/oxygenase (RuBisCo) activity.RuBisCo assembly.assembly factor (BSD2)	XP_004251716.1
Solyc01g097430	5.89778	-1.63318	0.00197967	0.173986	ABC transporter	GO:0016020	membrane	26.9.4.1	External stimuli response.symbiont.solute transport.lipid transporter (STR)	XP_004231234.1
Solyc02g032910	-2.2602	3.18158	0.00197977	0.173986	Glycine rich protein			35.2	not assigned.not annotated	NP_001233996.1
Solyc06g065950	1.42454	3.69509	0.00199479	0.174209	Vesicle-associated membrane protein, putative	GO:0016021|GO:0016192	integral component of membrane | vesicle-mediated transport	15.5.46 | 22.7.5.1	RNA biosynthesis.transcriptional regulation.transcription factor (FAR1) | Vesicle trafficking.SNARE target membrane recognition and fusion complexes.R-type SNARE longin components.VAMP7-group component	XP_010322723.1
Solyc07g051950	-1.66363	4.78348	0.00199692	0.174209	S-type anion channel SLAH1	GO:0016021|GO:0055085	integral component of membrane | transmembrane transport	24.3.10	Solute transport.channels.anion channel (SLAC)	XP_004243481.1
Solyc12g062160	4.53715	-0.531529	0.00199403	0.174209	LOW QUALITY:DUF1645 family protein			35.2	not assigned.not annotated	XP_010314561.1
Solyc12g099130	6.04108	-2.93925	0.00200978	0.174905	R2R3MYB transcription factor 108	GO:0003677	DNA binding	15.5.2.1	RNA biosynthesis.transcriptional regulation.MYB transcription factor superfamily.transcription factor (MYB)	NP_001234125.1
Solyc01g099990	1.86163	2.4248	0.00201968	0.17534	F-box protein	GO:0005515	protein binding	35.1	not assigned.annotated	XP_004230265.1
Solyc10g055240	-2.34734	1.00837	0.00202635	0.175493	1-phosphatidylinositol phosphodiesterase-related family protein	GO:0006629|GO:0008081	lipid metabolic process | phosphoric diester hydrolase activity	35.2	not assigned.not annotated	XP_004248661.1
Solyc04g007350	1.23432	3.80108	0.00204757	0.176903	DUF1639 family protein			35.2	not assigned.not annotated	XP_004237003.1
Solyc12g100120	-0.879039	5.98513	0.00208746	0.179914	DUF1680 domain protein	GO:0046373|GO:0046556	L-arabinose metabolic process | alpha-L-arabinofuranosidase activity	35.2	not assigned.not annotated	XP_004252848.1
Solyc07g008140	3.1424	2.83191	0.00211064	0.181039	Blue copper protein	GO:0009055	electron transfer activity	35.1	not assigned.annotated	XP_010323300.1
Solyc08g066690	1.27474	9.1919	0.0021085	0.181039	Exostosin family protein			18.1	Protein modification.glycosylation	XP_010325097.1
Solyc02g085290	1.88102	2.33383	0.0021428	0.182877	Maf protein, putative	GO:0047429	nucleoside-triphosphate diphosphatase activity	35.2	not assigned.not annotated	XP_004232406.1
Solyc04g078410	-2.86165	-1.08338	0.00214026	0.182877	Serine/threonine-protein kinase	GO:0048544	recognition of pollen	12.3.3.10 | 18.4.1.24.2	Chromatin organisation.histone modifications.histone lysine methylation.histone H3K4/H3K36 methylation reader (MRG) | Protein modification.phosphorylation.TKL protein kinase superfamily.G-Lectin protein kinase families.protein kinase (SD-2)	NP_001333998.1
Solyc06g068650	-2.35794	1.51342	0.00214741	0.182877	4-coumarate--CoA ligase	GO:0003824|GO:0008152	catalytic activity | metabolic process	7.8.1.1 | 9.2.1.3	Coenzyme metabolism.prenylquinone biosynthesis.4-hydroxybenzoate biosynthesis.p-coumarate:CoA ligase | Secondary metabolism.phenolics.p-coumaroyl-CoA biosynthesis.4-coumarate:CoA ligase (4CL)	NP_001333774.1
Solyc06g035555	-4.22251	0.394953	0.00215945	0.183466	MADS-box transcription factor	GO:0003700|GO:0005634|GO:0006355	DNA-binding transcription factor activity | nucleus | regulation of transcription, DNA-templated	35.2	not assigned.not annotated	XP_010321999.1
Solyc06g071820	-0.993217	7.85964	0.00218587	0.18527	BTB/POZ and TAZ domain protein	GO:0005515	protein binding	15.5.31 | 19.2.2.8.2.2.4	RNA biosynthesis.transcriptional regulation.transcription factor (TAZ) | Protein homeostasis.ubiquitin-proteasome system.ubiquitin-fold protein conjugation.Cullin-based ubiquitylation complexes.CUL3-BTB E3 ligase complexes.BTB/POZ substrate adaptor components.component BT	XP_004241527.1
Solyc07g055780	7.10504	-2.69513	0.00220594	0.18653	Trichome birefringence-like protein			35.1	not assigned.annotated	XP_004243780.1
Solyc12g011450	-2.55863	4.07131	0.00222585	0.187769	Chlorophyll a-b binding protein, chloroplastic	GO:0009765|GO:0016020	photosynthesis, light harvesting | membrane	1.1.1.1.1 | 12.1.3	Photosynthesis.photophosphorylation.photosystem II.LHC-II complex.component LHCb1/2/3 | Chromatin organisation.histones.histone (H2B)	NP_001296244.1
Solyc07g042360	7.74513	-1.65624	0.00223866	0.188406	Serine/threonine protein phosphatase 7 long form isogeny			35.2	not assigned.not annotated	XP_010318225.1	AT1G48120.1
Solyc06g053140	-1.42855	3.20639	0.00225418	0.189266	Rhodanese-like domain-containing protein			35.1	not assigned.annotated	XP_004240967.1
Solyc01g005000	-1.50025	5.49685	0.00226091	0.189387	Glutamate decarboxylase	GO:0016831|GO:0019752|GO:0030170	carboxy-lyase activity | carboxylic acid metabolic process | pyridoxal phosphate binding	4.1.1.1.3.1	Amino acid metabolism.biosynthesis.glutamate family.glutamate-derived amino acids.gamma-aminobutyrate (GABA).glutamate decarboxylase	NP_001233827.1
Solyc02g069180	1.27206	5.75329	0.00227532	0.190149	SBP (S-ribonuclease binding protein) family protein	GO:0005515|GO:0008270	protein binding | zinc ion binding	35.1	not assigned.annotated	XP_004233217.1
Solyc06g082860	-5.38609	-1.9619	0.00228074	0.190157	Cytochrome b561/ferric reductase transmembrane with DOMON related domain-containing protein			35.1	not assigned.annotated	XP_004242458.1
Solyc05g008120	-1.56043	2.7666	0.0022935	0.190776	Chaperone DnaJ			35.2	not assigned.not annotated	XP_004238841.1
Solyc06g065690	-1.93551	3.06566	0.00234138	0.194307	Serine/threonine protein phosphatase 2A regulatory subunit B	GO:0005488	binding	18.4.24.1.2.3	Protein modification.phosphorylation.serine/threonine protein phosphatase superfamily.PPP Fe-Zn-dependent phosphatase families.PP2A-class phosphatase complexes.regulatory component B1	NP_001296947.1
Solyc01g099650	-3.87039	-1.62647	0.00235671	0.195127	Formin-like protein			20.2.2.6.1	Cytoskeleton organisation.microfilament network.actin polymerisation.formin actin filament elongation factor activities.group-I formin	XP_010313078.1
Solyc02g014843	-5.96705	-3.04292	0.00237281	0.196006	Pectate lyase			35.2	not assigned.not annotated	XP_025884798.1
Solyc08g081700	4.89685	0.181516	0.00238361	0.196445	LOW QUALITY:Late embryogenesis abundant hydroxyproline-rich glycofamily protein, putative			35.2	not assigned.not annotated	NP_001233914.1	AT2G46150.1
Solyc04g054760	-1.25674	3.4802	0.00240005	0.197345	senescence-associated family protein (DUF581)			27.3.3	Multi-process regulation.SnRK1-kinase regulatory system.SnRK1-interacting factor (FLZ)	XP_004237417.1
Solyc00g010525	1.73563	4.61594	0.00248785	0.203163	Tetratricopeptide repeat (TPR)-like superfamily protein			35.2	not assigned.not annotated	XP_010312634.1
Solyc09g031970	-0.896336	6.37838	0.0024836	0.203163	Alpha-1,4 glucan phosphorylase	GO:0005975|GO:0008184	carbohydrate metabolic process | glycogen phosphorylase activity	3.2.3.5.2	Carbohydrate metabolism.starch metabolism.degradation.maltose metabolism.cytosolic alpha-glucan phosphorylase	XP_025888885.1
Solyc09g083310	-5.676	-3.31963	0.00248665	0.203163	E3 ubiquitin ligase DRIP2-like protein			35.1	not assigned.annotated	XP_025888788.1
Solyc07g049495	-3.98839	-1.33898	0.00252654	0.205384	RING/FYVE/PHD zinc finger superfamily protein			35.2	not assigned.not annotated	XP_019070335.1
Solyc09g089930	4.26631	1.88844	0.00252265	0.205384	ethylene responsive factor E.2	GO:0003700|GO:0006355	DNA-binding transcription factor activity | regulation of transcription, DNA-templated	15.5.7.1	RNA biosynthesis.transcriptional regulation.AP2/ERF transcription factor superfamily.transcription factor (ERF)	NP_001234818.1
Solyc01g107277	4.82521	-2.10723	0.0025505	0.206863	Phosphoribosylformylglycinamidine synthase, putative			35.2	not assigned.not annotated	XP_010316815.1
Solyc10g081470	-1.00523	4.65567	0.00258902	0.209511	lutescent-2	GO:0004222|GO:0006508	metalloendopeptidase activity | proteolysis	18.10.3.1	Protein modification.targeting peptide maturation.plastid.plastidial protease (EGY)	NP_001299816.1
Solyc12g005660	-2.2486	0.475673	0.00259531	0.209546	Zinc finger, B-box	GO:0005622|GO:0008270	intracellular | zinc ion binding	35.2	not assigned.not annotated	NP_001266001.1
Solyc03g113430	2.19146	5.66516	0.00260346	0.209731	Nitrate transporter NRT1-2	GO:0005215|GO:0006810|GO:0016020	transporter activity | transport | membrane	24.2.2.9	Solute transport.carrier-mediated transport.MFS superfamily.anion transporter (NRT1/PTR)	XP_004236178.1
Solyc06g065820	2.84142	0.943757	0.00264926	0.212941	Ethylene Response Factor H.1	GO:0003700|GO:0006355	DNA-binding transcription factor activity | regulation of transcription, DNA-templated	15.5.7.1	RNA biosynthesis.transcriptional regulation.AP2/ERF transcription factor superfamily.transcription factor (ERF)	NP_001234848.1
Solyc03g033840	2.63522	3.97054	0.00267439	0.213521	P-loop containing nucleoside triphosphate hydrolases superfamily protein	GO:0005524	ATP binding	35.1	not assigned.annotated	XP_004234549.1
Solyc09g007810	1.21383	3.15715	0.00266251	0.213521	Auxin Response Factor 16A	GO:0005515	protein binding	15.5.5.1	RNA biosynthesis.transcriptional regulation.B3 transcription factor superfamily.transcription factor (ARF)	XP_004246657.1
Solyc12g013710	-1.76435	3.35274	0.00267135	0.213521	light dependent NADH:protochlorophyllide oxidoreductase 1	GO:0016630|GO:0055114	protochlorophyllide reductase activity | oxidation-reduction process	7.12.6.5.1	Coenzyme metabolism.tetrapyrrol biosynthesis.chlorophyll metabolism.protochlorophyllide oxidoreductase (POR) activities.light-dependent POR	XP_004251852.1
Solyc03g044180	5.64301	2.08409	0.00269666	0.21482	Transmembrane protein, putative			11.10.1.1.1	Phytohormone action.signalling peptides.NCRP (non-cysteine-rich-peptide) category.PIP/PIPL-peptide activity.PIP/PIPL-precursor polypeptide	XP_019070303.1	AT4G37290.1
Solyc04g076800	-1.45937	2.17012	0.00272308	0.216442	Pentatricopeptide repeat-containing protein	GO:0008270	zinc ion binding	35.1	not assigned.annotated	XP_004238030.1
Solyc09g065620	-5.51122	-2.77342	0.00273551	0.216948	Chlorophyllase	GO:0015996|GO:0047746	chlorophyll catabolic process | chlorophyllase activity	7.12.6.7.1	Coenzyme metabolism.tetrapyrrol biosynthesis.chlorophyll metabolism.chlorophyll breakdown.chlorophyllase (CLH)	XP_004247197.1
Solyc07g065940	-2.44489	0.606376	0.00274668	0.217353	Transmembrane protein, putative			35.2	not assigned.not annotated	XP_010324235.1	AT3G13275.1
Solyc01g100760	-1.83102	7.49163	0.00278125	0.219602	plant/protein (Protein of unknown function, DUF538)			35.2	not assigned.not annotated	XP_004230326.1	AT1G56580.1
Solyc08g013910	-7.47651	-2.27147	0.00281206	0.221546	Plant cadmium resistance 2, putative			35.1	not assigned.annotated	XP_019070612.1
Solyc02g037490	-5.02134	-2.35892	0.00281883	0.221591	AMP-dependent synthetase and ligase family protein	GO:0003824|GO:0008152	catalytic activity | metabolic process	35.1	not assigned.annotated	XP_004231630.1	AT5G16370.1
Solyc01g108100	-1.29902	4.63521	0.00283459	0.22222	Cold regulated gene 27, putative isoform 1			35.2	not assigned.not annotated	XP_004230779.1
Solyc02g089460	2.26495	0.686018	0.00283926	0.22222	Glutamine dumper 2, putative			24.2.3	Solute transport.carrier-mediated transport.APC superfamily	XP_004244496.1
Solyc01g105500	-2.91672	-1.46846	0.00292475	0.227914	Endo-1,4-beta-xylanase	GO:0016798	hydrolase activity, acting on glycosyl bonds	35.1	not assigned.annotated	XP_010315116.1
Solyc07g007730	4.08093	-1.40614	0.00292263	0.227914	Defensin protein	GO:0006952	defense response	26.8.3.2.2	External stimuli response.pathogen.defense mechanisms.defensin activities.defensin (PDF2)	NP_001297247.1
Solyc00g008570	1.73308	4.32545	0.00294513	0.228012	SPA1-related 2			35.2	not assigned.not annotated	XP_004244387.1
Solyc03g115620	6.13078	-2.23297	0.00293669	0.228012	weak chloroplast movement under blue light protein (DUF827)			35.1	not assigned.annotated	XP_004236483.1
Solyc07g049530	2.06247	11.3626	0.00294313	0.228012	1-aminocyclopropane-1-carboxylate oxidase 1	GO:0016491|GO:0055114	oxidoreductase activity | oxidation-reduction process	11.5.1.2	Phytohormone action.ethylene.biosynthesis.1-aminocyclopropane-1-carboxylate (ACC) oxidase	NP_001234024.2
Solyc02g085950	-2.48115	1.9322	0.00295267	0.228102	cell wall protein X77373			1.2.1.1.2	Photosynthesis.calvin cycle.ribulose-1,5-bisphosphat carboxylase/oxygenase (RuBisCo) activity.RuBisCo heterodimer.small subunit	XP_025884840.1
Solyc03g120260	3.44599	2.95938	0.00296153	0.228293	Coatomer beta subunit, putative	GO:0005515	protein binding	35.1	not assigned.annotated	XP_004235705.1
Solyc04g053120	-0.956319	5.98056	0.00298919	0.228945	4-alpha-glucanotransferase	GO:0005975	carbohydrate metabolic process	3.2.3.3.3	Carbohydrate metabolism.starch metabolism.degradation.hydrolysis and phosphorolysis.plastidial glucanotransferase	XP_004237445.1
Solyc09g055830	-6.69726	-2.68948	0.00297974	0.228945	cation/hydrogen exchanger family protein			35.2	not assigned.not annotated	XP_004250374.1
Solyc11g068820	-0.955016	6.82862	0.00298883	0.228945	50S ribosomal protein L27	GO:0003735|GO:0005622|GO:0005840|GO:0006412	structural constituent of ribosome | intracellular | ribosome | translation	17.7.2.1.23	Protein biosynthesis.organelle machinery.plastidial ribosome.large ribosomal subunit proteome.component psRPL27	NP_001316317.1
Solyc08g014010	6.20529	1.15198	0.00300684	0.229804	Transmembrane protein, putative			35.2	not assigned.not annotated	XP_004244749.1
Solyc02g014847	-4.74491	-1.54746	0.00302447	0.230323	Replication protein A 70 kDa DNA-binding subunit B			13.2	Cell cycle organisation.DNA replication	XP_025888385.1
Solyc09g064490	6.12272	-2.73812	0.00302649	0.230323	Subtilisin-like protease SDD1	GO:0004252|GO:0006508	serine-type endopeptidase activity | proteolysis	19.4.2.1.1	Protein homeostasis.proteolysis.serine-type peptidase activities.S8-class protease (subtilisin) families.protease (SBT1)	XP_004247312.3
Solyc04g050950	-2.66691	1.59254	0.00307713	0.233679	Sn-1 protein	GO:0006952|GO:0009607	defense response | response to biotic stimulus	35.1	not assigned.annotated	XP_004237497.1
Solyc10g017980	3.42599	12.0903	0.00312421	0.236752	Chitinase	GO:0008061	chitin binding	35.1	not assigned.annotated	NP_001315589.1	AT3G12500.1
Solyc01g096720	4.05919	0.928351	0.00314368	0.237723	zinc induced facilitator-like 1	GO:0016021|GO:0055085	integral component of membrane | transmembrane transport	24.2.2.2.1	Solute transport.carrier-mediated transport.MFS superfamily.DHA-1 family.metal chelator transporter (ZIF/TOM)	XP_004230048.3
Solyc03g032035	-4.38879	-1.95405	0.00316359	0.238222	SNF2 domain-containing protein / helicase domain-containing protein / zinc finger protein-like protein			35.2	not assigned.not annotated
Solyc04g074000	4.29685	2.97374	0.00315761	0.238222	Receptor protein kinase, putative	GO:0005524	ATP binding	18.4.1.12	Protein modification.phosphorylation.TKL protein kinase superfamily.protein kinase (LRR-XII)	XP_010320167.1
Solyc10g049470	-3.17034	-1.48472	0.00317607	0.238659	Ycf1	GO:0016021	integral component of membrane	35.1	not assigned.annotated	YP_008563147.1	ATCG01130.1
Solyc06g048740	4.60612	0.04151	0.00320669	0.240455	Non-specific serine/threonine protein kinase	GO:0005515	protein binding	18.4.1.12	Protein modification.phosphorylation.TKL protein kinase superfamily.protein kinase (LRR-XII)	XP_010322115.1
Solyc05g056070	-2.09229	5.61824	0.00322589	0.241389	photosystem 1 protein	GO:0009765|GO:0016020	photosynthesis, light harvesting | membrane	1.1.4.1.1	Photosynthesis.photophosphorylation.photosystem I.LHC-I complex.component LHCa1	NP_001234032.2
Solyc01g006670	-1.25636	3.1716	0.00325904	0.242383	Glycosyltransferase	GO:0008152|GO:0016758	metabolic process | transferase activity, transferring hexosyl groups	50.2.4	Enzyme classification.EC_2 transferases.EC_2.4 glycosyltransferase	XP_004250870.1	AT5G12890.1
Solyc03g098310	-6.62744	-2.8499	0.00325951	0.242383	Ornithine decarboxylase 2	GO:0006596	polyamine biosynthetic process	8.1.2.1	Polyamine metabolism.putrescine biosynthesis.cytosolic pathway.ornithine decarboxylase	XP_004235480.2	AT3G14390.1
Solyc08g083190	-2.78838	-0.995733	0.00324938	0.242383	Alpha/beta-Hydrolases superfamily protein			21.9.5.1	Cell wall organisation.cutin and suberin.cutin polyester biosynthesis.lysophospholipase (BDG)	XP_004245454.1
Solyc02g022890	3.77868	-0.0202057	0.00328893	0.243056	Fatty acid 2-hydroxylase			5.4.10	Lipid metabolism.sphingolipid biosynthesis.sphingolipid fatty acid 2-hydroxylase	XP_004233153.1
Solyc02g072070	7.12695	-2.11149	0.00329073	0.243056	Serine/threonine-protein kinase	GO:0005524	ATP binding	18.4.1.24.2	Protein modification.phosphorylation.TKL protein kinase superfamily.G-Lectin protein kinase families.protein kinase (SD-2)	XP_010316850.1
Solyc04g016230	5.99094	1.24123	0.00329574	0.243056	Glycosyltransferase	GO:0008152|GO:0016758	metabolic process | transferase activity, transferring hexosyl groups	11.4.3.1	Phytohormone action.cytokinin.conjugation and degradation.UDP-dependent glycosyl transferase	XP_004236592.1
Solyc06g024386	3.21608	-0.696039	0.00327653	0.243056	Alpha-mannosidase			35.2	not assigned.not annotated	XP_004232502.1
Solyc02g087000	1.0419	4.56155	0.00332724	0.244371	Potassium transporter	GO:0015079|GO:0016020|GO:0071805	potassium ion transmembrane transporter activity | membrane | potassium ion transmembrane transport	24.2.3.11	Solute transport.carrier-mediated transport.APC superfamily.potassium cation transporter (HAK/KUP/KT)	XP_004232287.1
Solyc09g060100	-2.45986	0.152163	0.00332651	0.244371	transmembrane protein			50.2.7	Enzyme classification.EC_2 transferases.EC_2.7 transferase transferring phosphorus-containing group	XP_004247084.1
Solyc05g052600	-1.16086	6.27792	0.00334252	0.24499	Sedoheptulose-1,7-bisphosphatase	GO:0005975|GO:0042578	carbohydrate metabolic process | phosphoric ester hydrolase activity	1.2.8	Photosynthesis.calvin cycle.sedoheptulose-1,7-bisphosphatase	NP_001234585.1
Solyc12g010800	1.44747	4.06087	0.00336619	0.246221	BZIP family transcription factor	GO:0003700|GO:0006355|GO:0043565	DNA-binding transcription factor activity | regulation of transcription, DNA-templated | sequence-specific DNA binding	15.5.4.1	RNA biosynthesis.transcriptional regulation.bZIP transcription factor superfamily.transcription factor (bZIP)	XP_004251798.1
Solyc05g045670	-4.7131	1.384	0.00338567	0.246899	Glucose-6-phosphate/phosphate-translocator	GO:0005215|GO:0006810|GO:0016021	transporter activity | transport | integral component of membrane	24.2.1.1.1	Solute transport.carrier-mediated transport.DMT superfamily.NST-TPT group.phosphometabolite transporter (TPT|PPT|GPT|XPT)	XP_004240145.1
Solyc09g097910	-1.09821	4.62201	0.00338927	0.246899	30S ribosomal protein S1	GO:0003676	nucleic acid binding	35.1	not assigned.annotated	XP_004248019.1
Solyc01g097340	-1.09504	5.23972	0.00343468	0.248532	GDP-mannose 3',5'-epimerase	GO:0047918|GO:0051287	GDP-mannose 3,5-epimerase activity | NAD binding	10.3.1.4	Redox homeostasis.low-molecular-weight scavengers.ascorbate biosynthesis.GDP-D-mannose-epimerase (GME)	XP_010323635.1
Solyc03g121420	-3.27629	0.527503	0.00342985	0.248532	Inorganic pyrophosphatase 2	GO:0016791	phosphatase activity	5.2.4.5.1	Lipid metabolism.glycerolipid biosynthesis.phosphatidylcholine.choline homeostasis.phosphocholine phosphatase	XP_004235613.1
Solyc07g064890	0.823313	7.0734	0.00343948	0.248532	Ethylene Response Factor F.2	GO:0003700|GO:0006355	DNA-binding transcription factor activity | regulation of transcription, DNA-templated	15.5.7.1	RNA biosynthesis.transcriptional regulation.AP2/ERF transcription factor superfamily.transcription factor (ERF)	NP_001239044.1	AT1G50640.1
Solyc12g009490	4.38972	-1.94072	0.0034277	0.248532	Ethylene-responsive transcription factor	GO:0003700|GO:0006355	DNA-binding transcription factor activity | regulation of transcription, DNA-templated	15.5.7.1	RNA biosynthesis.transcriptional regulation.AP2/ERF transcription factor superfamily.transcription factor (ERF)	XP_004251720.1
Solyc07g054310	-2.73616	3.36595	0.00346068	0.24956	Cell wall protein			35.2	not assigned.not annotated	XP_025887944.1
Solyc00g011160	1.75312	5.13575	0.00352554	0.253725	Glucan endo-1,3-beta-glucosidase, basic vacuolar isoform			35.2	not assigned.not annotated	XP_004251509.1
Solyc03g112755	-4.02395	-1.57903	0.00354763	0.254802	Tornado 1			35.1	not assigned.annotated	XP_025885575.1
Solyc06g059880	-4.57557	-2.97682	0.00356654	0.25556	Acetolactate synthase	GO:0030976	thiamine pyrophosphate binding	4.1.2.2.8.3.1 | 4.1.3.2.1.1	Amino acid metabolism.biosynthesis.aspartate family.aspartate-derived amino acids.isoleucine.acetolactate synthase complex.catalytic subunit | Amino acid metabolism.biosynthesis.pyruvate family.pyruvate-derived amino acids.acetolactate synthase complex.catalytic subunit	XP_004242053.1
Solyc09g015020	1.62004	6.27154	0.00357928	0.25556	Heat-shock protein, putative			19.1.8.1	Protein homeostasis.protein quality control.smallHsp holdase chaperone activities.class-C-I protein	XP_004246305.1	AT3G46230.1
Solyc12g044950	3.68726	1.31429	0.00357962	0.25556	lipid desaturase	GO:0016717|GO:0055114	oxidoreductase activity, acting on paired donors, with oxidation of a pair of donors resulting in the reduction of molecular oxygen to two molecules of water | oxidation-reduction process	5.1.7.3	Lipid metabolism.fatty acid biosynthesis.fatty acid desaturation.omega-3/omega-6 fatty acid desaturase (FAD2/3/6-8)	NP_001292750.1
Solyc04g078300	-4.40102	-2.78162	0.00360153	0.256613	MADS-box transcription factor family protein	GO:0003677|GO:0046983	DNA binding | protein dimerization activity	15.5.14	RNA biosynthesis.transcriptional regulation.transcription factor (MADS/AGL)	XP_010320313.1
Solyc07g051840	1.45995	3.35833	0.00361163	0.256821	WRKY transcription factor 17			15.5.22	RNA biosynthesis.transcriptional regulation.transcription factor (WRKY)	XP_004243486.1
Solyc02g083810	-1.00976	7.13517	0.00364496	0.258164	Ferredoxin--NADP reductase	GO:0016491|GO:0055114	oxidoreductase activity | oxidation-reduction process	1.1.5.2.1	Photosynthesis.photophosphorylation.linear electron flow.ferredoxin-NADP reductase (FNR) activity.ferredoxin-NADP oxidoreductase	XP_004232495.1
Solyc08g082780	-2.93359	-1.49908	0.00364022	0.258164	Transmembrane protein, putative			35.2	not assigned.not annotated	XP_010318034.1
Solyc05g050280	-1.80823	3.2921	0.00366172	0.258254	Auxin-responsive GH3 family protein	GO:0009611|GO:0009694|GO:0009864|GO:0080123	response to wounding | jasmonic acid metabolic process | induced systemic resistance, jasmonic acid mediated signaling pathway | jasmonate-amino synthetase activity	11.7.3.2	Phytohormone action.jasmonic acid.conjugation and degradation.jasmonoyl-amino acid synthetase (JAR1)	XP_004240084.1
Solyc06g075070	-3.4738	-1.0502	0.00366789	0.258254	Carbonic anhydrase	GO:0004089|GO:0006730|GO:0008270	carbonate dehydratase activity | one-carbon metabolic process | zinc ion binding	50.4.2	Enzyme classification.EC_4 lyases.EC_4.2 carbon-oxygen lyase	XP_004241280.1
Solyc09g082270	7.86515	1.44777	0.00365502	0.258254	Lipid transfer protein	GO:0006869|GO:0008289	lipid transport | lipid binding	21.4.1.1.4	Cell wall organisation.cell wall proteins.hydroxyproline-rich glycoprotein activities.arabinogalactan-protein (AGP) activities.xylogen-type AGP (XYP/XYLP)	XP_004247575.1
Solyc06g068200	3.49772	-1.87209	0.00372078	0.261463	Far1-related sequence 6	GO:0008270	zinc ion binding	15.5.46	RNA biosynthesis.transcriptional regulation.transcription factor (FAR1)	XP_019069862.1	AT1G52520.1
Solyc06g009290	3.852	4.66726	0.00373502	0.261949	ABC transporter B family protein	GO:0005524|GO:0016887	ATP binding | ATPase activity	24.1.3.1.1	Solute transport.primary active transport.ABC superfamily.ABC1 family.subfamily ABCB transporter	XP_010321860.1
Solyc01g086680	4.02597	4.58389	0.0037698	0.263871	glutathione S-transferase T1	GO:0005515	protein binding	18.8.1.4	Protein modification.S-glutathionylation.glutathione S-transferase activities.class tau glutathione S-transferase	NP_001234082.1
Solyc09g055860	-2.97634	-1.45321	0.0037851	0.26391	LOW QUALITY:Plant invertase/pectin methylesterase inhibitor superfamily protein			35.2	not assigned.not annotated	XP_004239608.1
Solyc10g008300	-0.846266	5.35098	0.00378482	0.26391	Mannan endo-1,4-beta-mannosidase 1	GO:0005975	carbohydrate metabolic process	21.2.3.2.2	Cell wall organisation.hemicellulose.heteromannan.modification and degradation.endo-beta-1,4-mannanase	XP_004248170.1
Solyc02g075610	-0.75147	6.40498	0.00385823	0.267963	Golgin candidate 6	GO:0000139|GO:0005737|GO:0006886|GO:0048280	Golgi membrane | cytoplasm | intracellular protein transport | vesicle fusion with Golgi apparatus	22.6.7.7	Vesicle trafficking.target membrane tethering.Golgi membrane tethering factors.golgin (GC6)	XP_010316823.1
Solyc06g066620	-0.836187	6.24553	0.00385687	0.267963	Thylakoid membrane phosphoprotein, chloroplastic	GO:0009579	thylakoid	35.1	not assigned.annotated	XP_004241735.1
Solyc02g065240	-1.94062	8.91435	0.00394325	0.272282	Methyl esterase			35.1	not assigned.annotated	XP_004233422.1
Solyc02g071770	1.44751	4.48738	0.00393482	0.272282	histone acetyltransferase (DUF1264)			12.3.1	Chromatin organisation.histone modifications.histone acetylation	XP_004232996.1
Solyc09g014350	-2.2567	1.96787	0.00394226	0.272282	Glycerol-3-phosphate acyltransferase	GO:0008152|GO:0016746	metabolic process | transferase activity, transferring acyl groups	5.2.1.2.2 | 21.9.1.5.1	Lipid metabolism.glycerolipid biosynthesis.phosphatidate.endoplasmic reticulum phosphatidate biosynthesis.glycerol-3-phosphate acyltransferase (GPAT4-8) | Cell wall organisation.cutin and suberin.cuticular lipid formation.monoacylglyceryl ester monomer biosynthesis.cutin sn-glycerol-3-phosphate acyltransferase	NP_001315360.1
Solyc09g011540	4.24081	0.4723	0.00399402	0.275257	Glutathione S-transferase	GO:0005515	protein binding	18.8.1.4	Protein modification.S-glutathionylation.glutathione S-transferase activities.class tau glutathione S-transferase	XP_004246385.1	AT3G09270.1
Solyc02g094300	-1.36812	2.86883	0.00402887	0.277124	ACT domain-containing protein	GO:0008152|GO:0016597	metabolic process | amino acid binding	35.1	not assigned.annotated	XP_004231764.1
Solyc09g031940	-0.846198	4.30808	0.00406119	0.278811	Protein RETICULATA-RELATED 3, chloroplastic			35.1	not assigned.annotated	XP_004246971.1	AT3G08640.1
Solyc04g009910	1.23166	2.67005	0.00407482	0.279211	phosphoenolpyruvate carboxylase kinase 1	GO:0005524	ATP binding	1.4.1.2 | 18.4.5.7	Photosynthesis.CAM/C4 photosynthesis.phosphoenolpyruvate (PEP) carboxylase activity.PEP carboxylase regulatory kinase | Protein modification.phosphorylation.CAMK protein kinase superfamily.protein kinase (PPCK)	XP_004236793.1
Solyc07g007620	-2.14816	0.356378	0.00408384	0.279294	Monogalactosyldiacylglycerol synthase	GO:0016758	transferase activity, transferring hexosyl groups	5.3.2	Lipid metabolism.galactolipid and sulfolipid biosynthesis.monogalactosyldiacylglycerol synthase (MGD)	XP_004242736.1
Solyc03g118240	-1.03037	4.41658	0.00409751	0.279694	Magnesium-protoporphyrin O-methyltransferase	GO:0015995|GO:0046406	chlorophyll biosynthetic process | magnesium protoporphyrin IX methyltransferase activity	7.12.6.2	Coenzyme metabolism.tetrapyrrol biosynthesis.chlorophyll metabolism.Mg-protoporphyrin IX O-methyltransferase	XP_004235845.1
Solyc06g035940	-2.55513	0.759868	0.00412432	0.280113	Homeobox leucine zipper protein	GO:0008289	lipid binding	15.5.3.3	RNA biosynthesis.transcriptional regulation.Homeobox transcription factor superfamily.transcription factor (HD-ZIP IV)	XP_004240735.1
Solyc09g010800	1.06233	11.1582	0.00411544	0.280113	metallothionein II-like protein	GO:0046872	metal ion binding	35.1	not assigned.annotated	NP_001234046.2
Solyc12g062200	2.04601	2.27336	0.00412714	0.280113	LOW QUALITY:Ferredoxin--NADP reductase, chloroplastic			35.2	not assigned.not annotated	XP_004250300.2
Solyc07g045340	0.983387	7.68206	0.00415613	0.281547	RPM1-interacting protein 4 family protein			35.1	not assigned.annotated	XP_004243583.1
Solyc01g010720	-2.12743	0.45585	0.0041963	0.283195	Carboxypeptidase	GO:0004185|GO:0006508	serine-type carboxypeptidase activity | proteolysis	19.4.2.2	Protein homeostasis.proteolysis.serine-type peptidase activities.S10-class serine carboxypeptidase (SCPL)	XP_004228838.3
Solyc12g100270	8.37255	2.63727	0.00419127	0.283195	Fatty acid hydroxylase superfamily	GO:0005506|GO:0006633|GO:0016491|GO:0055114	iron ion binding | fatty acid biosynthetic process | oxidoreductase activity | oxidation-reduction process	21.9.1.7.1.1	Cell wall organisation.cutin and suberin.cuticular lipid formation.alkane-forming pathway.CER1-CER3 alkane-forming complex.aldehyde decarbonylase component CER1	XP_004252845.1
Solyc02g072560	-6.17375	-3.00602	0.00425472	0.286597	LOW QUALITY:transcription factor-like protein	GO:0006351|GO:0043565	transcription, DNA-templated | sequence-specific DNA binding	35.2	not assigned.not annotated	XP_019067599.1	AT4G18690.1
Solyc04g081250	2.61749	1.28866	0.00426736	0.286908	Small auxin up-regulated RNA51	GO:0009733	response to auxin	35.2	not assigned.not annotated	XP_004238340.1	AT1G75590.1
Solyc07g040890	5.86396	1.49947	0.00431456	0.28738	Gibberellin receptor GID1, putative	GO:0008152|GO:0016787	metabolic process | hydrolase activity	35.1	not assigned.annotated	XP_010324041.1	AT5G62180.1
Solyc07g049560	-1.29834	4.06248	0.00428917	0.28738	Tyrosine specific protein phosphatase family protein	GO:0004725|GO:0016311|GO:0016791	protein tyrosine phosphatase activity | dephosphorylation | phosphatase activity	18.4.23.2.6	Protein modification.phosphorylation.tyrosine protein phosphatase (PTP) superfamily.dual-specificity phosphatase activities.atypical dual-specificity phosphatase (PFA-DSP)	XP_010323851.1
Solyc07g065110	-3.05359	2.06613	0.00431106	0.28738	Lipid transfer protein			35.2	not assigned.not annotated	XP_010324294.1	AT5G55410.2
Solyc09g008020	1.02258	6.5831	0.00430959	0.28738	OTU domain-containing protein			19.2.3.1.2.7	Protein homeostasis.ubiquitin-proteasome system.ubiquitin-fold protein deconjugation.ubiquitin deconjugation.OTU deubiquitinase activities.deubiquitinase (OTU6-12)	XP_004246644.1
Solyc09g075810	-1.82768	2.44762	0.00429915	0.28738	Early nodulin-like protein	GO:0009055	electron transfer activity	35.1	not assigned.annotated	XP_004247371.1
Solyc08g075800	-3.59697	-2.20794	0.0043467	0.288983	AMP-dependent synthetase and ligase family protein	GO:0003824|GO:0008152	catalytic activity | metabolic process	27	Multi-process regulation	XP_004246201.2	AT1G20560.1
Solyc09g059340	-1.49958	1.7658	0.00441805	0.293181	serine/threonine protein kinase 2			35.2	not assigned.not annotated	XP_010325928.1
Solyc05g014300	2.0771	3.61488	0.00447698	0.295994	LOW QUALITY:NAC domain containing protein 5			35.2	not assigned.not annotated	XP_004243550.1
Solyc06g075220	-4.41149	-2.79078	0.00447101	0.295994	Fasciclin-like arabinogalactan protein			21.4.1.1.3	Cell wall organisation.cell wall proteins.hydroxyproline-rich glycoprotein activities.arabinogalactan-protein (AGP) activities.fasciclin-type AGP (FLA)	XP_004241271.1	AT5G03170.1
Solyc04g082010	-1.50389	5.78871	0.00448944	0.29627	pre-plastocyanin	GO:0005507|GO:0009055	copper ion binding | electron transfer activity	1.1.3.1	Photosynthesis.photophosphorylation.Cytb6/f to PS-I electron carriers.plastocyanin	NP_001296192.1	AT1G20340.1
Solyc08g068290	1.10863	5.93675	0.00450531	0.29677	Sulfite exporter TauE/SafE family protein	GO:0016021	integral component of membrane	24.2.6.2	Solute transport.carrier-mediated transport.TOC superfamily.transport protein (TSUP)	XP_004245262.1
Solyc10g050870	0.93972	4.2281	0.00454243	0.298665	Sulfotransferase			35.2	not assigned.not annotated	XP_004248738.1
Solyc00g265510	-2.26804	4.97836	0.00464193	0.303148	LOW QUALITY:Protein Ycf2			35.2	not assigned.not annotated
Solyc07g042440	-1.32506	5.01465	0.00463649	0.303148	Peroxiredoxin	GO:0045454	cell redox homeostasis	10.5.3.2	Redox homeostasis.chloroplast redox homeostasis.2-Cys peroxiredoxin activities.atypical 2-Cys peroxiredoxin (PrxQ)	NP_001296953.1
Solyc08g080280	-6.40055	-2.19178	0.00462347	0.303148	FAM91 carboxy-terminus protein			35.2	not assigned.not annotated	XP_004246130.1
Solyc10g007040	-2.47536	1.65289	0.00464452	0.303148	Core-2/I-branching beta-1,6-N-acetylglucosaminyltransferase family protein	GO:0008375|GO:0016020	acetylglucosaminyltransferase activity | membrane	35.1	not assigned.annotated	XP_010327134.1
Solyc05g047580	2.83103	1.3924	0.00465739	0.303434	Terpene cyclase/mutase family member	GO:0016866	intramolecular transferase activity	9.1.4.3	Secondary metabolism.terpenoids.terpene biosynthesis.triterpenoid synthase	XP_019069346.1
Solyc01g090460	1.75271	3.74967	0.00475383	0.309155	HD-ZIP	GO:0006355|GO:0043565	regulation of transcription, DNA-templated | sequence-specific DNA binding	15.5.3.1	RNA biosynthesis.transcriptional regulation.Homeobox transcription factor superfamily.transcription factor (HD-ZIP I/II)	NP_001234233.1
Solyc09g009420	-2.2962	1.44561	0.00478299	0.309924	LOW QUALITY:AMP-dependent synthetase and ligase family protein			35.1	not assigned.annotated	XP_010313363.1	AT3G52740.1
Solyc09g020190	0.773835	6.57348	0.00477614	0.309924	non-specific phospholipase C1-like	GO:0016788	hydrolase activity, acting on ester bonds	5.7.2.3.1	Lipid metabolism.lipid degradation.phospholipase activities.phospholipase C activities.phospholipase C (nPLC)	NP_001332942.1
Solyc04g009050	-1.0233	4.20109	0.00481527	0.311451	Dentin sialophosphoprotein-related, putative isoform 5			35.1	not assigned.annotated	XP_025886366.1
Solyc10g009380	-1.54668	3.18607	0.00484586	0.312864	arginine N-methyltransferase, putative (DUF688)			35.2	not assigned.not annotated	XP_004248086.1
Solyc12g100250	6.59344	4.07417	0.00485939	0.313172	Fatty acid desaturase	GO:0016717|GO:0055114	oxidoreductase activity, acting on paired donors, with oxidation of a pair of donors resulting in the reduction of molecular oxygen to two molecules of water | oxidation-reduction process	5.1.7.3	Lipid metabolism.fatty acid biosynthesis.fatty acid desaturation.omega-3/omega-6 fatty acid desaturase (FAD2/3/6-8)	XP_004252862.1
Solyc05g053640	-2.47954	-1.8469	0.00488218	0.314075	LOW QUALITY:Clavata3/ESR (CLE) gene family member MtCLE06			35.2	not assigned.not annotated	XP_010314494.1
Solyc04g081655	1.74136	0.894808	0.00489123	0.314092	Cyclin			35.2	not assigned.not annotated	XP_004238428.1
Solyc07g065570	-3.53245	-1.5445	0.00491897	0.314193	Nuclear transcription factor Y subunit B	GO:0046982	protein heterodimerization activity	35.1	not assigned.annotated	XP_025887967.1
Solyc10g008250	4.00127	-1.11176	0.00491915	0.314193	Basic helix-loop-helix transcription factor	GO:0046983	protein dimerization activity	35.2	not assigned.not annotated	XP_004248474.1
Solyc12g089130	0.911721	4.36406	0.00490779	0.314193	Sec14p-like phosphatidylinositol transfer family protein			35.2	not assigned.not annotated	XP_010314636.1
Solyc03g097440	-1.35624	7.2976	0.00494135	0.314488	Dehydrogenase/reductase SDR family protein 7-like protein	GO:0016491	oxidoreductase activity	5.9.4	Lipid metabolism.lipid bodies-associated activities.steroleosin dehydrogenase (HSD/SLO)	XP_004235330.1
Solyc06g064500	-1.3863	4.34021	0.0049343	0.314488	O-methyltransferase	GO:0046983	protein dimerization activity	50.2.1	Enzyme classification.EC_2 transferases.EC_2.1 transferase transferring one-carbon group	XP_004241912.1	AT5G54160.1
Solyc02g077520	6.25926	0.479907	0.00498185	0.316502	O-methyltransferase, putative	GO:0046983	protein dimerization activity	50.2.1 | 5.5.1.1	Enzyme classification.EC_2 transferases.EC_2.1 transferase transferring one-carbon group | Lipid metabolism.phytosterol biosynthesis.campesterol.sterol C-24 methyltransferase	XP_004232928.1
Solyc01g080570	8.01586	0.22227	0.00503246	0.316913	inosine-uridine preferring nucleoside hydrolase family protein			6.1.4.4	Nucleotide metabolism.purines.catabolism.nucleoside hydrolase (NSH3)	XP_004229485.1
Solyc02g078210	-1.22441	4.22688	0.00500727	0.316913	Ubiquitin-conjugating enzyme family protein			25.3.1.2	Nutrient uptake.phosphorus assimilation.phosphate signalling.ubiquitin-conjugating E2 protein (PHO2)	XP_010316754.1
Solyc03g116190	3.26225	1.28101	0.00503262	0.316913	LOW QUALITY:Chitinase	GO:0008061	chitin binding	35.2	not assigned.not annotated	XP_019068637.1
Solyc06g083650	-3.94683	-2.17033	0.00502002	0.316913	GDSL esterase/lipase	GO:0016788	hydrolase activity, acting on ester bonds	21.9.5.2	Cell wall organisation.cutin and suberin.cutin polyester biosynthesis.cutin synthase (CD)	XP_004242381.1
Solyc09g090970	4.15882	2.57323	0.00500466	0.316913	Major allergen Pru ar 1	GO:0006952|GO:0009607	defense response | response to biotic stimulus	35.1	not assigned.annotated	NP_001234352.2
Solyc05g024490	-3.284	0.565702	0.00508863	0.319877	Actin family protein			35.2	not assigned.not annotated	XP_010326147.2
Solyc01g087040	-1.34526	3.18908	0.00510132	0.320112	PsbP-like	GO:0005509|GO:0009523|GO:0009654|GO:0015979|GO:0019898	calcium ion binding | photosystem II | photosystem II oxygen evolving complex | photosynthesis | extrinsic component of membrane	35.1	not assigned.annotated	XP_004229619.1	AT3G63540.1
Solyc01g006930	-1.19902	4.44443	0.00517614	0.320661	Nuclear transcription factor Y subunit A-10, putative	GO:0003700|GO:0006355	DNA-binding transcription factor activity | regulation of transcription, DNA-templated	15.5.51.1	RNA biosynthesis.transcriptional regulation.NF-Y transcription factor complex.component NF-YA	XP_004228658.1
Solyc02g092590	-2.61204	1.28552	0.00519415	0.320661	T-box transcription factor, putative (DUF863)			35.2	not assigned.not annotated	XP_010316006.1
Solyc03g071533	-1.51476	1.06284	0.00519688	0.320661	catalase 3			35.2	not assigned.not annotated	XP_010315995.1
Solyc07g006030	-1.39916	2.58556	0.00520868	0.320661	F-box family protein			35.2	not assigned.not annotated	XP_004230284.1
Solyc07g055260	-1.11378	3.41858	0.00513339	0.320661	DnaJ			35.1	not assigned.annotated	NP_001317628.1
Solyc09g018490	-1.95507	0.0610067	0.00519371	0.320661	Serine/threonine-protein kinase			35.1	not assigned.annotated	XP_019071354.1
Solyc09g020110	-0.7497	6.76871	0.00515139	0.320661	T2-type RNase	GO:0003723|GO:0033897	RNA binding | ribonuclease T2 activity	35.1	not assigned.annotated	NP_001307144.1
Solyc10g083330	1.6763	2.57158	0.00515327	0.320661	LOW QUALITY:At2g36220/F2H17.17			35.2	not assigned.not annotated	XP_004249438.1	AT2G36220.1
Solyc11g043115	-4.03822	-2.8272	0.00517671	0.320661	Cytochrome c biogenesis protein CcsA			35.1	not assigned.annotated	XP_004242877.1
Solyc12g006050	-4.09488	-0.494065	0.0051742	0.320661	Major facilitator superfamily protein	GO:0005215|GO:0006810|GO:0016020	transporter activity | transport | membrane	24.2.2.9	Solute transport.carrier-mediated transport.MFS superfamily.anion transporter (NRT1/PTR)	XP_004251535.1
Solyc12g009200	-3.35972	0.491882	0.00520005	0.320661	Chlorophyll a-b binding protein, chloroplastic	GO:0009765|GO:0016020	photosynthesis, light harvesting | membrane	1.1.4.1.6	Photosynthesis.photophosphorylation.photosystem I.LHC-I complex.component LHCa6	XP_004251698.1
Solyc09g025200	-5.81921	-3.25685	0.0052933	0.325311	60S ribosomal protein L18	GO:0003735|GO:0005622|GO:0005840|GO:0006412	structural constituent of ribosome | intracellular | ribosome | translation	17.1.2.1.18	Protein biosynthesis.ribosome biogenesis.large ribosomal subunit (LSU).LSU proteome.component RPL18	XP_010313195.1
Solyc01g008620	8.31419	-1.16532	0.00530598	0.32553	Beta-1,3-glucanase	GO:0005975	carbohydrate metabolic process	50.3.2	Enzyme classification.EC_3 hydrolases.EC_3.2 glycosylase	NP_001234798.2
Solyc04g008260	-1.99045	1.22889	0.00537006	0.328898	PURPLE ACID PHOSPHATASE family protein	GO:0016787	hydrolase activity	35.1	not assigned.annotated	XP_004236915.1
Solyc09g065560	2.54061	2.9458	0.00544032	0.332632	Sulfate transporter	GO:0008272|GO:0015116|GO:0016021	sulfate transport | sulfate transmembrane transporter activity | integral component of membrane	20.2.5.1.1 | 24.2.3.1.1	Cytoskeleton organisation.microfilament network.actin-membrane compartment interaction.NET-type actin-membrane nexus protein families.actin-binding protein (NET1) | Solute transport.carrier-mediated transport.APC superfamily.SulP family.sulfate transporter (SULTR)	XP_004247192.1
Solyc05g055030	6.73486	0.742106	0.00545001	0.332655	R2R3MYB transcription factor 10	GO:0003677	DNA binding	15.5.2.1	RNA biosynthesis.transcriptional regulation.MYB transcription factor superfamily.transcription factor (MYB)	XP_004240193.1
Solyc02g084740	1.1204	3.86513	0.00551746	0.336199	Cytochrome P450	GO:0016705|GO:0055114	oxidoreductase activity, acting on paired donors, with incorporation or reduction of molecular oxygen | oxidation-reduction process	11.3.1.4	Phytohormone action.brassinosteroid.biosynthesis.3-epi-6-deoxocathasterone 23-monooxygenase	XP_025885299.1
Solyc01g107780	4.37856	3.1192	0.00556879	0.338749	Glycosyltransferase	GO:0008152|GO:0016758	metabolic process | transferase activity, transferring hexosyl groups	9.2.2.6.1	Secondary metabolism.phenolics.flavonoid biosynthesis.flavonol glycosides.flavonol 3-O-glycosyltransferase	XP_004230753.1
Solyc10g075070	1.61573	4.28384	0.00557864	0.338772	Non-specific lipid-transfer protein	GO:0006869|GO:0008289	lipid transport | lipid binding	35.1	not assigned.annotated	NP_001316314.1
Solyc01g104650	1.5371	6.31769	0.00559431	0.339148	Transcription factor	GO:0003700|GO:0006355|GO:0043565	DNA-binding transcription factor activity | regulation of transcription, DNA-templated | sequence-specific DNA binding	15.5.4.1	RNA biosynthesis.transcriptional regulation.bZIP transcription factor superfamily.transcription factor (bZIP)	XP_004230593.1
Solyc11g006920	0.953836	3.71433	0.0056611	0.342616	Iron-sulfur cluster assembly protein IscA	GO:0005198|GO:0016226|GO:0051536	structural molecule activity | iron-sulfur cluster assembly | iron-sulfur cluster binding	7.11.2.2.1	Coenzyme metabolism.iron-sulfur cluster assembly machinery.mitochondrial ISC system.transfer phase.scaffold protein (ISC-A)	XP_004249963.1
Solyc10g085880	1.39041	10.969	0.00569492	0.344081	Glycosyltransferase	GO:0008152|GO:0016758	metabolic process | transferase activity, transferring hexosyl groups	50.2.4	Enzyme classification.EC_2 transferases.EC_2.4 glycosyltransferase	NP_001348277.1	AT2G36770.1
Solyc01g005295	-2.42895	1.99562	0.00572462	0.345292	Sec14p-like phosphatidylinositol transfer family protein			35.2	not assigned.not annotated	XP_010316452.1
Solyc03g120440	1.31291	5.69552	0.00573628	0.345413	cyclin A2_1	GO:0005634	nucleus	1.3.7	Photosynthesis.photorespiration.glycerate kinase	XP_025885990.1
Solyc10g007690	-1.62563	6.35844	0.00575594	0.346014	Chlorophyll a-b binding protein, chloroplastic	GO:0009765|GO:0016020	photosynthesis, light harvesting | membrane	1.1.4.1.3	Photosynthesis.photophosphorylation.photosystem I.LHC-I complex.component LHCa3	NP_001332771.1
Solyc09g061630	6.80891	-2.60016	0.00576573	0.346021	Fatty acid hydroxylase superfamily			35.2	not assigned.not annotated	XP_025887692.1
Solyc06g048770	-2.01572	-0.320507	0.00581369	0.348092	syntaxin of plants 51			35.2	not assigned.not annotated	XP_004245614.1
Solyc07g007750	-1.52217	6.93299	0.00581971	0.348092	Defensin protein	GO:0006952	defense response	26.8.3.2.2	External stimuli response.pathogen.defense mechanisms.defensin activities.defensin (PDF2)	NP_001234872.2
Solyc06g068520	1.0741	4.82105	0.00587636	0.34887	Hydroxyproline-rich systemin			35.1	not assigned.annotated	NP_001234375.1
Solyc08g005460	-2.43905	-0.86133	0.00586257	0.34887	Protein BREVIS RADIX			35.1	not assigned.annotated	XP_010324485.1
Solyc09g089950	-4.22344	-3.16632	0.00588147	0.34887	LOW QUALITY:BEL1-like homeodomain 10			35.2	not assigned.not annotated	XP_010326880.1
Solyc10g079620	-0.900844	3.90333	0.0058711	0.34887	haloacid dehalogenase	GO:0008152|GO:0016787	metabolic process | hydrolase activity	35.2	not assigned.not annotated	NP_001334518.1
Solyc10g085080	-2.06664	1.80443	0.0058646	0.34887	8-amino-7-oxononanoate synthase			35.2	not assigned.not annotated	XP_010312302.1
Solyc02g072160	-0.867931	4.91114	0.00596887	0.353468	NAD(P)-binding Rossmann-fold superfamily protein			2.4.1	Cellular respiration.oxidative phosphorylation.NADH dehydrogenase complex	XP_010316840.1
Solyc02g087500	-5.15322	-1.51486	0.00598619	0.353908	Glycerol-3-phosphate acyltransferase	GO:0016491|GO:0055114	oxidoreductase activity | oxidation-reduction process	5.2.1.2.2 | 18.9.1 | 26.9.3.2	Lipid metabolism.glycerolipid biosynthesis.phosphatidate.endoplasmic reticulum phosphatidate biosynthesis.glycerol-3-phosphate acyltransferase (GPAT4-8) | Protein modification.hydroxylation.prolyl hydroxylase | External stimuli response.symbiont.lipid biosynthesis.glycerol-3-phosphate acyl transferase (RAM2)	XP_004233693.1
Solyc05g015850	4.50368	4.67093	0.00600559	0.354469	WRKY transcription factor 75	GO:0003700|GO:0006355|GO:0043565	DNA-binding transcription factor activity | regulation of transcription, DNA-templated | sequence-specific DNA binding	15.5.22	RNA biosynthesis.transcriptional regulation.transcription factor (WRKY)	NP_001310244.1
Solyc08g066480	-5.27173	-2.94508	0.00602648	0.355115	Myb/SANT-like DNA-binding domain protein			15.5.2.2	RNA biosynthesis.transcriptional regulation.MYB transcription factor superfamily.transcription factor (MYB-related)	XP_025883703.1
Solyc03g115900	-2.903	4.57439	0.00606027	0.356519	chlorophyll a-b binding protein CAB11	GO:0009765|GO:0016020	photosynthesis, light harvesting | membrane	1.1.4.1.4	Photosynthesis.photophosphorylation.photosystem I.LHC-I complex.component LHCa4	NP_001316908.1
Solyc07g054290	-1.13184	4.49627	0.00607123	0.356577	photosystem II family protein	GO:0010207	photosystem II assembly	1.1.1.3.8	Photosynthesis.photophosphorylation.photosystem II.assembly and maintenance.regulatory protein (Psb27)	XP_004243333.3	AT1G03600.1
Solyc03g116130	5.46939	-2.83034	0.00611554	0.358591	Glutathione s-transferase, putative	GO:0005515	protein binding	18.8.1.4	Protein modification.S-glutathionylation.glutathione S-transferase activities.class tau glutathione S-transferase	XP_004236471.3
Solyc02g065060	-2.79723	1.90584	0.00616555	0.359754	3-ketodihydrosphingosine reductase			35.2	not assigned.not annotated	XP_004233435.1
Solyc08g069065	1.30736	6.94286	0.00616312	0.359754	Hexosyltransferase	GO:0006486|GO:0008378|GO:0016020	protein glycosylation | galactosyltransferase activity | membrane	21.4.1.1.5.3	Cell wall organisation.cell wall proteins.hydroxyproline-rich glycoprotein activities.arabinogalactan-protein (AGP) activities.AGP glycosylation.AGP beta-1,3-galactosyltransferase	XP_004245304.1
Solyc11g068530	-2.27047	-0.0729933	0.00615411	0.359754	LOW QUALITY:FANTASTIC four-like protein (DUF3049)			35.2	not assigned.not annotated	XP_004242110.1	AT5G22390.1
Solyc02g092890	4.58811	1.57434	0.0062237	0.361767	LOW QUALITY:Transmembrane protein, putative			11.10.1.1.1	Phytohormone action.signalling peptides.NCRP (non-cysteine-rich-peptide) category.PIP/PIPL-peptide activity.PIP/PIPL-precursor polypeptide	YP_009430475.1
Solyc06g069730	-2.94711	-0.998991	0.00623039	0.361767	chlorophyll a-b binding protein Cab12	GO:0009765|GO:0016020	photosynthesis, light harvesting | membrane	1.1.4.1.4	Photosynthesis.photophosphorylation.photosystem I.LHC-I complex.component LHCa4	NP_001317570.1
Solyc12g006997	1.82288	0.346921	0.00622822	0.361767	Heavy metal transport/detoxification superfamily protein	GO:0030001|GO:0046872	metal ion transport | metal ion binding	24.1	Solute transport.primary active transport	XP_004251597.1
Solyc12g100230	7.35704	-0.98885	0.00628829	0.364537	Fatty acid desaturase	GO:0016717|GO:0055114	oxidoreductase activity, acting on paired donors, with oxidation of a pair of donors resulting in the reduction of molecular oxygen to two molecules of water | oxidation-reduction process	5.1.7.3	Lipid metabolism.fatty acid biosynthesis.fatty acid desaturation.omega-3/omega-6 fatty acid desaturase (FAD2/3/6-8)	XP_019067122.1	AT3G12120.1
Solyc02g084160	2.21694	0.182331	0.00632541	0.366096	ATP-dependent clp protease ATP-binding subunit clpx, putative			35.2	not assigned.not annotated	XP_019067278.1
Solyc01g097160	-0.931519	4.39827	0.00638836	0.366184	FAD/NAD(P)-binding oxidoreductase family protein	GO:0016491|GO:0055114	oxidoreductase activity | oxidation-reduction process	35.2	not assigned.not annotated	XP_025888114.1
Solyc04g010130	4.08964	-3.07166	0.00637387	0.366184	LOW QUALITY:Chalcone synthase			35.2	not assigned.not annotated	XP_019068839.1
Solyc04g014400	2.66273	2.79166	0.00637946	0.366184	LRR receptor-like kinase	GO:0030246	carbohydrate binding	18.4.1.36 | 27.4.7	Protein modification.phosphorylation.TKL protein kinase superfamily.receptor-like protein kinase (RLCK-VI) | Multi-process regulation.Rop-GTPase regulatory system.GTPase interactive protein kinase (RBK/RRK)	XP_010319234.1
Solyc05g018490	0.876682	6.02639	0.00634112	0.366184	Copper ion-binding protein, putative			25.5	Nutrient uptake.copper uptake	NP_001304657.1
Solyc06g065550	5.18853	0.318088	0.00638544	0.366184	Cysteine/Histidine-rich C1 domain family protein			35.2	not assigned.not annotated	XP_025884280.1
Solyc12g044520	-5.95261	-3.20827	0.00637781	0.366184	Glutathione S-transferase	GO:0005515	protein binding	18.8.1.3	Protein modification.S-glutathionylation.glutathione S-transferase activities.class lambda glutathione S-transferase	XP_010314303.1
Solyc06g008980	-3.34182	-1.3305	0.00641087	0.3663	F-box/WD repeat-containing 10			20.2.4.4	Cytoskeleton organisation.microfilament network.myosin microfilament-based motor protein activities.myosin adaptor protein (MadA)	XP_004240534.1
Solyc06g074070	-1.85508	3.72415	0.00640853	0.3663	Receptor-kinase-like protein	GO:0005524	ATP binding	18.4.1.9	Protein modification.phosphorylation.TKL protein kinase superfamily.protein kinase (LRR-IX)	XP_004241337.1
Solyc02g014860	-1.21499	6.58188	0.00644394	0.367603	DnaJ domain-containing protein			16.4.1.4.1	RNA processing.pre-mRNA splicing.U2-type-intron-specific major spliceosome.U5 small nuclear ribonucleoprotein particle (snRNP).protein factor (U5-15kDa/YLS8)	XP_004231500.1
Solyc04g015140	1.72651	1.73265	0.00646334	0.368122	Low PSII Accumulation 3			1.1.1.2	Photosynthesis.photophosphorylation.photosystem II.PS-II complex	XP_004237681.1
Solyc04g076770	-3.56868	-1.1274	0.00652193	0.370869	Peroxidase	GO:0004601|GO:0055114	peroxidase activity | oxidation-reduction process	21.6.2.3 | 24.2.10.2	Cell wall organisation.lignin.monolignol conjugation and polymerization.lignin peroxidase | Solute transport.carrier-mediated transport.OPT family.oligopeptide transporter (OPT)	XP_004238027.1
Solyc05g005350	-3.45704	-2.31938	0.0066609	0.378133	Transcription factor	GO:0046982	protein heterodimerization activity	15.5.51.2	RNA biosynthesis.transcriptional regulation.NF-Y transcription factor complex.component NF-YB	XP_004239341.1
Solyc12g035190	-2.15967	0.987446	0.00667083	0.378133	Anthranilate phosphoribosyltransferase	GO:0008152|GO:0016757	metabolic process | transferase activity, transferring glycosyl groups	4.1.5.3.2	Amino acid metabolism.biosynthesis.shikimate family.tryptophan.anthranilate phosphoribosyltransferase	XP_004252211.1
Solyc00g008580	1.77258	5.85972	0.0067089	0.37969	UDP-glucosyl transferase 73B5			35.2	not assigned.not annotated	XP_010326922.1
Solyc00g068980	1.97808	2.42878	0.00689965	0.38864	LOW QUALITY:Superoxide dismutase [Cu-Zn] 1			35.2	not assigned.not annotated	XP_019069708.1
Solyc03g118850	-0.909102	4.43808	0.00689058	0.38864	Catalytic, putative	GO:0004252|GO:0006508	serine-type endopeptidase activity | proteolysis	35.2	not assigned.not annotated	XP_004235774.2
Solyc09g072873	3.79496	-2.2843	0.00687956	0.38864	LOW QUALITY:UDP-N-acetylglucosamine 1-carboxyvinyltransferase	GO:0016765	transferase activity, transferring alkyl or aryl (other than methyl) groups	35.2	not assigned.not annotated	XP_004244269.1
Solyc09g061825	6.61704	-2.34416	0.00692537	0.389476	Tetratricopeptide repeat (TPR)-like superfamily protein			35.2	not assigned.not annotated	XP_010312071.1
Solyc07g062810	-1.7311	0.459423	0.00694153	0.389772	Branched-chain-amino-acid aminotransferase-like protein	GO:0008696|GO:0030170|GO:0046656	4-amino-4-deoxychorismate lyase activity | pyridoxal phosphate binding | folic acid biosynthetic process	7.5.1.2	Coenzyme metabolism.tetrahydrofolate biosynthesis.p-aminobenzoate biosynthesis.aminodeoxychorismate lyase	XP_010324377.1
Solyc10g085830	1.17591	6.9391	0.0070263	0.393297	Caffeic acid O-methyltransferase	GO:0008171	O-methyltransferase activity	7.9.6.1	Coenzyme metabolism.NAD/NADP biosynthesis.NAD homeostasis.nicotinate N-methyltransferase	XP_010312333.1
Solyc11g042640	-0.913705	4.07784	0.00701936	0.393297	Rieske domain containing protein	GO:0016491|GO:0051537|GO:0055114	oxidoreductase activity | 2 iron, 2 sulfur cluster binding | oxidation-reduction process	1.1.1.3.13	Photosynthesis.photophosphorylation.photosystem II.assembly and maintenance.stabilizing factor (Psb33)	XP_004250718.1
Solyc12g100240	7.6401	-0.757901	0.00711665	0.397732	Fatty acid desaturase			5.1.7.3	Lipid metabolism.fatty acid biosynthesis.fatty acid desaturation.omega-3/omega-6 fatty acid desaturase (FAD2/3/6-8)	XP_019067122.1	AT3G12120.1
Solyc11g071470	3.4944	3.07849	0.00712978	0.397844	Agmatine coumaroyltransferase-2	GO:0016747	transferase activity, transferring acyl groups other than amino-acyl groups	50.2.3	Enzyme classification.EC_2 transferases.EC_2.3 acyltransferase	XP_004251197.1	AT5G48930.1
Solyc04g049240	-1.81487	0.704585	0.0072042	0.400746	Photosystem II protein D1			1.1.1.2.4	Photosynthesis.photophosphorylation.photosystem II.PS-II complex.component PsbJ	XP_025886813.1
Solyc10g085890	1.71615	7.24978	0.00719873	0.400746	poly(ADP-ribose) glycohydrolase 2			35.2	not assigned.not annotated	XP_010312309.1
Solyc12g056620	-1.96392	1.52956	0.00723348	0.40175	Photosystem II 22 kDa, chloroplastic			1.1.1.3.7.3	Photosynthesis.photophosphorylation.photosystem II.assembly and maintenance.HCF244-OHP assembly factor complex.component OHP2	XP_004252569.1
Solyc00g011150	1.56956	4.0957	0.00726466	0.402232	LOW QUALITY:photosystem II stability/assembly factor, chloroplast (HCF136)			35.2	not assigned.not annotated	XP_010326922.1
Solyc10g077120	-1.0846	6.26405	0.00725532	0.402232	Photosystem II core complex proteins psbY	GO:0009523|GO:0015979|GO:0016021|GO:0030145	photosystem II | photosynthesis | integral component of membrane | manganese ion binding	1.1.1.2.14	Photosynthesis.photophosphorylation.photosystem II.PS-II complex.component PsbY	XP_004249106.1
Solyc09g011550	2.91839	3.09007	0.00728096	0.402512	Glutathione S-transferase	GO:0005515	protein binding	18.8.1.4	Protein modification.S-glutathionylation.glutathione S-transferase activities.class tau glutathione S-transferase	XP_004246383.1	AT3G09270.1
Solyc04g009900	1.25186	2.54727	0.0073003	0.402958	phosphoenolpyruvate carboxylase kinase	GO:0005524	ATP binding	1.4.1.2 | 18.4.5.7	Photosynthesis.CAM/C4 photosynthesis.phosphoenolpyruvate (PEP) carboxylase activity.PEP carboxylase regulatory kinase | Protein modification.phosphorylation.CAMK protein kinase superfamily.protein kinase (PPCK)	NP_001234394.1
Solyc05g053900	1.32348	3.89066	0.0073619	0.405732	Eukaryotic aspartyl protease family protein	GO:0004190|GO:0006508	aspartic-type endopeptidase activity | proteolysis	19.4.3.1	Protein homeostasis.proteolysis.aspartic-type peptidase activities.A1-class protease (Pepsin)	XP_025887046.1
Solyc03g032040	-1.26265	5.28351	0.00744457	0.409657	Tonoplast monosaccharide transporter 1	GO:0016021|GO:0022857|GO:0055085	integral component of membrane | transmembrane transporter activity | transmembrane transport	24.2.2.1.4	Solute transport.carrier-mediated transport.MFS superfamily.SP family.monosaccharide transporter (AZT)	XP_025885576.1
Solyc03g080100	-1.48015	7.27291	0.00747117	0.409991	Heavy metal transport/detoxification superfamily protein	GO:0030001|GO:0046872	metal ion transport | metal ion binding	35.1	not assigned.annotated	XP_004235034.1
Solyc06g053585	-1.11576	3.05544	0.00747355	0.409991	Aldo/keto reductase family oxidoreductase	GO:0016491|GO:0055114	oxidoreductase activity | oxidation-reduction process	35.1	not assigned.annotated	XP_004241009.1
Solyc01g099970	1.05683	4.00087	0.00751702	0.411744	F-box/LRR protein	GO:0005515	protein binding	35.1	not assigned.annotated	XP_010313225.1
Solyc07g007020	1.79798	-0.0864452	0.00757441	0.414253	Kinase family protein	GO:0030247	polysaccharide binding	18.4.1.25	Protein modification.phosphorylation.TKL protein kinase superfamily.protein kinase (WAK/WAKL)	XP_010323256.2
Solyc11g043110	-3.83739	-0.668299	0.00758952	0.414446	GDSL esterase/lipase	GO:0016788	hydrolase activity, acting on ester bonds	35.1	not assigned.annotated	XP_004250819.1
Solyc04g081270	2.19017	-0.254267	0.00762271	0.415624	Small auxin up-regulated RNA52	GO:0009733	response to auxin	35.1	not assigned.annotated	XP_004238342.1	AT1G75580.1
Solyc07g055217	5.27521	-2.91132	0.00768295	0.41827	Transcription factor ILI2			35.2	not assigned.not annotated	XP_004252871.1
Solyc02g062560	-1.84909	1.15717	0.00772246	0.41851	Tobacco mosaic virus resistance-1	GO:0003824	catalytic activity	35.2	not assigned.not annotated	XP_019067502.1
Solyc02g070970	-3.72081	-0.314039	0.00772046	0.41851	Chlorophyll a-b binding protein, chloroplastic	GO:0009765|GO:0016020	photosynthesis, light harvesting | membrane	1.1.1.1.1	Photosynthesis.photophosphorylation.photosystem II.LHC-II complex.component LHCb1/2/3	NP_001333218.1	AT1G29930.1
Solyc03g121000	1.06091	4.23756	0.00772155	0.41851	RNA polymerase II-associated factor 1			35.2	not assigned.not annotated	XP_019068724.1
Solyc01g111210	-1.70204	2.31792	0.00774456	0.418724	Amidase, putative			35.1	not assigned.annotated	XP_019067476.1
Solyc03g093890	2.69244	2.94674	0.0077498	0.418724	R2R3MYB transcription factor 52	GO:0003677	DNA binding	15.5.2.1	RNA biosynthesis.transcriptional regulation.MYB transcription factor superfamily.transcription factor (MYB)	NP_001333764.1
Solyc08g005700	1.80196	1.20276	0.00777516	0.41946	trigalactosyldiacylglycerol 1			35.2	not assigned.not annotated	XP_004252642.1
Solyc06g065200	1.04525	3.47738	0.00779793	0.420055	Uncharacterized protein			35.2	not assigned.not annotated	XP_004241838.1
Solyc09g098440	2.25924	2.60549	0.00785733	0.422618	ROP-interactive CRIB motif protein			27.4.5.2	Multi-process regulation.Rop-GTPase regulatory system.ROP GTPase effector activities.GTPase effector (RIC)	XP_004247985.1
Solyc06g053320	0.774747	4.5894	0.00787709	0.423044	RNA-binding protein	GO:0003676	nucleic acid binding	35.1	not assigned.annotated	XP_004240984.1
Solyc07g064960	-2.40045	0.0643622	0.00790227	0.423761	Phosphatidate cytidylyltransferase	GO:0016020|GO:0016772	membrane | transferase activity, transferring phosphorus-containing groups	5.2.6.1 | 18.12.3	Lipid metabolism.glycerolipid biosynthesis.phosphatidylglycerol.CDP-diacylglycerol synthase | Protein modification.protein folding.nascent polypeptide chaperone (TF)	XP_010324302.1
Solyc02g084120	5.30875	-2.00441	0.00791863	0.424002	ATP-dependent Clp protease ATP-binding subunit ClpX	GO:0005524|GO:0006457|GO:0051082	ATP binding | protein folding | unfolded protein binding	35.2	not assigned.not annotated	XP_010316420.1
Solyc02g077240	0.720788	8.19402	0.00793206	0.424087	Pyruvate decarboxylase	GO:0030976	thiamine pyrophosphate binding	3.11.1.1	Carbohydrate metabolism.fermentation.alcoholic fermentation.pyruvate decarboxylase	XP_004232952.1
Solyc10g006900	-1.59146	2.61959	0.00796198	0.424485	light dependent NADH:protochlorophyllide oxidoreductase 3 s2	GO:0016630|GO:0055114	protochlorophyllide reductase activity | oxidation-reduction process	7.12.6.5.1	Coenzyme metabolism.tetrapyrrol biosynthesis.chlorophyll metabolism.protochlorophyllide oxidoreductase (POR) activities.light-dependent POR	NP_001304903.1
Solyc11g011220	0.771475	5.89492	0.00796325	0.424485	Transmembrane protein			35.2	not assigned.not annotated	XP_004250186.1
Solyc07g009333	-3.19997	-2.32263	0.00798731	0.424502	60S acidic ribosomal protein P3			17.1.2.1.48	Protein biosynthesis.ribosome biogenesis.large ribosomal subunit (LSU).LSU proteome.component RPP3	NP_001309732.1
Solyc12g008830	-5.28311	-3.39338	0.00797771	0.424502	GATA-like transcription factor	GO:0006355|GO:0008270	regulation of transcription, DNA-templated | zinc ion binding	35.2	not assigned.not annotated	XP_004251667.1
Solyc09g042660	-1.23495	1.81677	0.00808295	0.428948	Non-specific serine/threonine protein kinase	GO:0007165	signal transduction	18.4.5.3	Protein modification.phosphorylation.CAMK protein kinase superfamily.SNF1-related protein kinase (SnRK3)	XP_010326216.2
Solyc04g055020	-5.29008	-3.44593	0.0081083	0.429656	Succinate dehydrogenase [ubiquinone] iron-sulfur subunit, mitochondrial	GO:0051537	2 iron, 2 sulfur cluster binding	2.3.6.1.2	Cellular respiration.tricarboxylic acid cycle.succinate dehydrogenase complex.components.iron-sulphur component SDH2	XP_004237596.1
Solyc01g073950	0.957035	4.90437	0.00813061	0.4302	DNA-binding bromodomain-containing protein, putative	GO:0005515	protein binding	15.5.2.2	RNA biosynthesis.transcriptional regulation.MYB transcription factor superfamily.transcription factor (MYB-related)	XP_004229352.1
Solyc03g097240	-1.02631	3.70374	0.00820714	0.433609	DnAJ-like protein			35.1	not assigned.annotated	XP_010318289.1
Solyc02g088190	-2.21024	1.16969	0.00823808	0.434601	MYB-related transcription factor	GO:0003677	DNA binding	15.5.2.1	RNA biosynthesis.transcriptional regulation.MYB transcription factor superfamily.transcription factor (MYB)	XP_004232212.1
Solyc07g006700	-5.19873	-1.60123	0.00827021	0.435013	Pathogenesis-related family protein	GO:0005576	extracellular region	35.1	not assigned.annotated	XP_004242675.1	AT4G25780.1
Solyc07g053700	-2.64613	-0.470464	0.00826388	0.435013	Reticulon-like protein			35.1	not assigned.annotated	XP_010323753.1
Solyc08g082630	-3.17614	-0.00248792	0.0083023	0.43542	Auxin Response Factor 9A	GO:0005515	protein binding	15.5.5.1	RNA biosynthesis.transcriptional regulation.B3 transcription factor superfamily.transcription factor (ARF)	XP_010325288.1
Solyc10g008000	3.26317	0.318718	0.0083018	0.43542	LIGHT-DEPENDENT SHORT HYPOCOTYLS-like protein (DUF640)			35.1	not assigned.annotated	XP_010327093.1	AT2G42610.1
Solyc11g027690	1.9632	2.75203	0.00831499	0.435447	LOW QUALITY:Flavin-binding kelch domain F box protein			35.2	not assigned.not annotated	XP_004228739.1
Solyc11g068370	-3.09821	-0.0277083	0.00834631	0.436448	bZIP transcription factor family protein	GO:0006351|GO:0043565	transcription, DNA-templated | sequence-specific DNA binding	15.5.4.1 | 15.5.4.7.1	RNA biosynthesis.transcriptional regulation.bZIP transcription factor superfamily.transcription factor (bZIP) | RNA biosynthesis.transcriptional regulation.bZIP transcription factor superfamily.TGA transcription factor activity.transcription factor (TGA)	XP_010313357.1
Solyc09g018970	-3.5852	-1.98561	0.0084405	0.438862	LOW QUALITY:Kinase interacting (KIP1-like) family protein			35.2	not assigned.not annotated	XP_010322512.1
Solyc10g007090	-4.15455	-1.76771	0.00844154	0.438862	Protein DETOXIFICATION	GO:0006855|GO:0015238|GO:0015297|GO:0016020|GO:0055085	drug transmembrane transport | antiporter activity | membrane | transmembrane transport	35.2	not assigned.not annotated	XP_010327132.1
Solyc11g045520	-6.23571	-3.03229	0.00840564	0.438862	1-AMINOCYCLOPROPANE-1-CARBOXYLATE OXIDASE-like protein	GO:0016491|GO:0055114	oxidoreductase activity | oxidation-reduction process	25.4.3.3.2	Nutrient uptake.iron uptake.chelation-based strategy uptake.iron-mobilizing coumarin biosynthesis.scopoletin 8-hydroxylase	XP_004250780.1
Solyc11g068430	0.897868	7.98105	0.00841702	0.438862	Ferredoxin family protein	GO:0051537	2 iron, 2 sulfur cluster binding	1.1.5.1	Photosynthesis.photophosphorylation.linear electron flow.ferredoxin electron carrier	XP_010313364.1
Solyc02g050210	-1.44944	0.891333	0.00845982	0.439174	Breast cancer type 2 susceptibility	GO:0000724|GO:0006281	double-strand break repair via homologous recombination | DNA repair	13.3.6.4.2 | 14.3.2.1	Cell cycle organisation.mitosis and meiosis.meiotic recombination.DNA strand exchange.DMC1-recruitment protein (BRCA2) | DNA damage response.homologous recombination repair (HR).BRCC DNA-damage response complex.component BRCA2	XP_019067653.1
Solyc11g013110	-1.32044	5.24782	0.00862834	0.447273	Flavonol synthase	GO:0016491|GO:0055114	oxidoreductase activity | oxidation-reduction process	9.2.2.5.1	Secondary metabolism.phenolics.flavonoid biosynthesis.flavonols.flavonol synthase	XP_004250329.1
Solyc00g117655	-3.44162	-2.52848	0.00871817	0.449325	NADH-ubiquinone oxidoreductase chain 1	GO:0016020|GO:0055114	membrane | oxidation-reduction process	35.1	not assigned.annotated	YP_008563144.1
Solyc04g071060	2.54064	-0.253038	0.00870895	0.449325	ROP uanine nucleotide exchange factor 10			35.2	not assigned.not annotated	XP_010320496.1
Solyc07g055820	-3.32223	-0.946962	0.00868157	0.449325	LOW QUALITY:Leucine-rich repeat receptor-like protein kinase family protein	GO:0005515	protein binding	35.1	not assigned.annotated	XP_025884784.1
Solyc09g005690	-3.05312	-1.12525	0.00871714	0.449325	Type I inositol-1,4,5-trisphosphate 5-phosphatase CVP2-like protein	GO:0046856	phosphatidylinositol dephosphorylation	27.5.4.1	Multi-process regulation.phosphoinositide lipid regulatory system.inositol polyphosphate 5-phosphatase activities.type-I inositol-polyphosphate 5-phosphatase	XP_025888747.1
Solyc06g024210	1.59637	5.08388	0.00874085	0.449845	LOW QUALITY:Senescence-associated protein			35.2	not assigned.not annotated	XP_010315002.1
Solyc01g087050	-5.54406	-3.35382	0.00877343	0.45012	Protein TRANSPARENT TESTA 1	GO:0046872	metal ion binding	15.5.15	RNA biosynthesis.transcriptional regulation.transcription factor (C2H2-ZF)	XP_004231115.1
Solyc08g079280	-0.934047	4.94775	0.00879652	0.45012	Cytochrome P450 family protein	GO:0016705|GO:0055114	oxidoreductase activity, acting on paired donors, with incorporation or reduction of molecular oxygen | oxidation-reduction process	50.1.13 | 11.1.3.2	Enzyme classification.EC_1 oxidoreductases.EC_1.14 oxidoreductase acting on paired donor with incorporation or reduction of molecular oxygen | Phytohormone action.abscisic acid.conjugation and degradation.abscisic acid hydroxylase	XP_004245721.1
Solyc09g075470	-1.97164	0.794367	0.00878694	0.45012	LOW QUALITY:DnaJ-like protein			35.2	not assigned.not annotated	XP_004247393.1	AT1G71000.1
Solyc11g050890	1.64563	0.315496	0.00877591	0.45012	P-loop containing nucleoside triphosphate hydrolases superfamily protein			35.2	not assigned.not annotated	XP_019069916.1
Solyc11g008630	-1.8886	2.2689	0.00884979	0.452199	HXXXD-type acyl-transferase family protein	GO:0016747	transferase activity, transferring acyl groups other than amino-acyl groups	50.2.3	Enzyme classification.EC_2 transferases.EC_2.3 acyltransferase	XP_004250074.1
Solyc08g074303	-6.08384	-3.08394	0.00886832	0.452499	NAD(P)-linked oxidoreductase superfamily protein			35.2	not assigned.not annotated	XP_004229198.1
Solyc10g081340	5.17719	-1.82303	0.00888305	0.452605	LOW QUALITY:Phytochrome kinase substrate 4, putative			26.1.2.2.3	External stimuli response.light.UV-A/blue light.phototropin-mediated photoperception.phototropin signalling factor (PKS)	XP_004249767.1	AT5G04190.1
Solyc02g083740	-1.32129	2.11849	0.00895408	0.453753	Oligopeptide transporter, putative	GO:0055085	transmembrane transport	15.5.28 | 24.2.10.2	RNA biosynthesis.transcriptional regulation.transcription factor (GeBP) | Solute transport.carrier-mediated transport.OPT family.oligopeptide transporter (OPT)	XP_010317692.1
Solyc07g009380	2.75072	1.9848	0.00891996	0.453753	xyloglucan endotransglucosylase-hydrolase 2	GO:0010411|GO:0016762|GO:0042546	xyloglucan metabolic process | xyloglucan:xyloglucosyl transferase activity | cell wall biogenesis	50.2.4	Enzyme classification.EC_2 transferases.EC_2.4 glycosyltransferase	NP_001234342.1
Solyc09g059345	5.53293	-2.71097	0.00895633	0.453753	Zinc finger, CW-type			35.2	not assigned.not annotated	XP_004247543.2
Solyc11g012930	1.32852	5.16459	0.00894051	0.453753	WAT1-related protein	GO:0016021|GO:0022857	integral component of membrane | transmembrane transporter activity	24.2.1.5	Solute transport.carrier-mediated transport.DMT superfamily.solute transporter (UmamiT)	XP_019066706.1
Solyc06g068330	1.111	3.05225	0.00899625	0.454489	LOW QUALITY:serine-rich protein-like protein			35.2	not assigned.not annotated	XP_004241685.1	AT5G25280.1
Solyc11g010740	-1.50609	1.27734	0.00898561	0.454489	Glycosyltransferase	GO:0008152|GO:0016758	metabolic process | transferase activity, transferring hexosyl groups	50.2.4	Enzyme classification.EC_2 transferases.EC_2.4 glycosyltransferase	XP_004250156.1
Solyc03g043900	2.07983	2.83092	0.00902039	0.455066	Basic-leucine zipper (BZIP) transcription factor family	GO:0003700|GO:0006355|GO:0043565	DNA-binding transcription factor activity | regulation of transcription, DNA-templated | sequence-specific DNA binding	15.5.4.1	RNA biosynthesis.transcriptional regulation.bZIP transcription factor superfamily.transcription factor (bZIP)	XP_004234711.1	AT3G49760.1
Solyc12g045020	8.35901	-0.228271	0.00904754	0.455792	Cytochrome P450 family protein	GO:0016705|GO:0055114	oxidoreductase activity, acting on paired donors, with incorporation or reduction of molecular oxygen | oxidation-reduction process	50.1.13	Enzyme classification.EC_1 oxidoreductases.EC_1.14 oxidoreductase acting on paired donor with incorporation or reduction of molecular oxygen	XP_004252382.1
Solyc02g086700	8.22559	-1.49699	0.00907212	0.456387	Beta-1,3-glucanase	GO:0005975	carbohydrate metabolic process	50.3.2	Enzyme classification.EC_3 hydrolases.EC_3.2 glycosylase	XP_004232306.2
Solyc06g067940	0.713441	6.15927	0.00909517	0.456905	Cytochrome c oxidase subunit 5b	GO:0004129|GO:0005740	cytochrome-c oxidase activity | mitochondrial envelope	2.4.5.1.4	Cellular respiration.oxidative phosphorylation.cytochrome c oxidase complex.core components.component COX5b	XP_004241710.1
Solyc07g044860	-1.03125	8.42431	0.00911451	0.456932	psbXphotosystem II 23 kDa protein	GO:0005509|GO:0009523|GO:0009654|GO:0015979|GO:0019898	calcium ion binding | photosystem II | photosystem II oxygen evolving complex | photosynthesis | extrinsic component of membrane	1.1.1.2.2.2.1	Photosynthesis.photophosphorylation.photosystem II.PS-II complex.oxygen-evolving center (OEC) extrinsic proteins.Viridiplantae-specific components.component OEC23/PsbP	NP_001234109.2
Solyc09g083200	1.47114	3.92882	0.00912126	0.456932	Receptor-like protein kinase	GO:0004672|GO:0006468	protein kinase activity | protein phosphorylation	18.4.1.21 | 26.9.1.2	Protein modification.phosphorylation.TKL protein kinase superfamily.protein kinase (LysM) | External stimuli response.symbiont.symbiosis signalling pathway.LysM receptor kinase (NFR5/NFP)	XP_004247635.1
Solyc06g036234	5.74159	-2.12096	0.00918713	0.458306	Pleiotropic drug resistance ABC transporter	GO:0005524|GO:0016887	ATP binding | ATPase activity	35.1	not assigned.annotated	XP_004253003.1
Solyc10g007110	-1.09593	6.84565	0.00917989	0.458306	Tyrosine aminotransferase	GO:0009058|GO:0030170	biosynthetic process | pyridoxal phosphate binding	10.3.2.1	Redox homeostasis.low-molecular-weight scavengers.tocopherol biosynthesis.tyrosine aminotransferase	XP_004248255.1
Solyc12g011310	-1.74676	7.46973	0.00917208	0.458306	Glutathione S-transferase	GO:0005515	protein binding	18.8.1.4	Protein modification.S-glutathionylation.glutathione S-transferase activities.class tau glutathione S-transferase	XP_004251828.1
Solyc06g064895	1.50538	1.59444	0.0092114	0.458877	Aldehyde dehydrogenase, putative	GO:0008152|GO:0016491|GO:0055114	metabolic process | oxidoreductase activity | oxidation-reduction process	35.2	not assigned.not annotated	NP_001333533.1
Solyc09g018785	3.73944	-2.32734	0.00924296	0.45962	RNI-like superfamily protein isoform 2			35.2	not assigned.not annotated	XP_010325705.1
Solyc12g088830	1.92719	1.09137	0.00925202	0.45962	Protein WEAK CHLOROPLAST MOVEMENT UNDER BLUE LIGHT 1			20.5.8.1	Cytoskeleton organisation.plastid movement.WEB1-PMI2 actin filament reorganisation complex.component WEB1	XP_025884305.1
Solyc06g059860	1.39783	3.06439	0.00927031	0.45989	patatin-like phospholipase domain protein			35.2	not assigned.not annotated	XP_004242054.1
Solyc03g007860	-1.22227	2.6153	0.00934128	0.46149	Protein PAM68, chloroplastic			1.1.1.3.14	Photosynthesis.photophosphorylation.photosystem II.assembly and maintenance.assembly factor (PAM68)	XP_004234285.1	AT5G52780.1
Solyc05g005440	-3.95922	-3.22451	0.0093289	0.46149	Transcription factor	GO:0046982	protein heterodimerization activity	15.5.51.2	RNA biosynthesis.transcriptional regulation.NF-Y transcription factor complex.component NF-YB	XP_004239344.1
Solyc08g081850	3.19017	-0.650449	0.00933103	0.46149	LOW QUALITY:transmembrane protein, putative (DUF1191)			35.2	not assigned.not annotated	XP_004246104.1	AT4G23720.1
Solyc01g058500	1.56908	6.20693	0.00940956	0.463583	LOW QUALITY:TBP-associated factor 2			35.2	not assigned.not annotated	XP_004238797.1
Solyc03g118320	1.79706	0.617599	0.00940903	0.463583	AAA family ATPase	GO:0005524	ATP binding	35.2	not assigned.not annotated	XP_010318668.1	AT1G24290.1
Solyc07g065810	4.83784	0.147739	0.00943862	0.464375	LOW QUALITY:RING/U-box superfamily protein	GO:0005515|GO:0008270	protein binding | zinc ion binding	35.1	not assigned.annotated	XP_004244025.1	AT5G55970.1
Solyc01g111330	-4.31944	-1.82577	0.00946517	0.464404	Pathogenesis-related thaumatin family protein			35.1	not assigned.annotated	XP_004231024.1
Solyc12g098850	1.50947	4.95766	0.00945387	0.464404	ethylene-forming enzyme			5.2.10.2	Lipid metabolism.glycerolipid biosynthesis.triacylglycerols.iron-sulfur protein (DGAT3)	XP_004252959.1
Solyc03g093800	1.76275	2.45667	0.00950993	0.46596	glycine-rich protein			35.2	not assigned.not annotated	XP_004235193.1
Solyc01g107910	-1.47831	3.98318	0.00959976	0.468437	Caffeoyl CoA O-methyltransferase	GO:0008171	O-methyltransferase activity	21.6.1.4	Cell wall organisation.lignin.monolignol biosynthesis.caffeoyl-CoA 3-O-methyltransferase (CCoA-OMT)	XP_004230766.1
Solyc05g023730	-1.96023	-0.667465	0.00958032	0.468437	LOW QUALITY:50S ribosomal protein L2, chloroplastic	GO:0003735|GO:0005622|GO:0005840|GO:0006412	structural constituent of ribosome | intracellular | ribosome | translation	35.1	not assigned.annotated	YP_008563153.1	ATCG01310.1
Solyc07g026540	-6.21214	-2.75747	0.00959115	0.468437	cytokinin oxidase 4			35.2	not assigned.not annotated	XP_010314646.1
Solyc10g080620	-2.66125	0.566408	0.00964997	0.470245	LOW QUALITY:NAD(P)H-quinone oxidoreductase subunit 2 A, chloroplastic			35.2	not assigned.not annotated	XP_004233605.1
Solyc01g111800	-1.26128	1.08448	0.00967016	0.470588	Amino acid permease family protein	GO:0003333|GO:0015171|GO:0016020	amino acid transmembrane transport | amino acid transmembrane transporter activity | membrane	24.2.3.5.1	Solute transport.carrier-mediated transport.APC superfamily.APC family.amino acid transporter (LAT)	XP_019067487.1
Solyc07g054940	-3.84289	-2.9	0.00972876	0.472155	2-oxoglutarate (2OG) and Fe(II)-dependent oxygenase superfamily protein	GO:0016491|GO:0055114	oxidoreductase activity | oxidation-reduction process	50.1.13	Enzyme classification.EC_1 oxidoreductases.EC_1.14 oxidoreductase acting on paired donor with incorporation or reduction of molecular oxygen	XP_004243794.1
Solyc11g005190	-1.63579	2.74578	0.00972004	0.472155	Transducin/WD40 repeat-like superfamily protein	GO:0005515	protein binding	18.4.16 | 26.1.3.3	Protein modification.phosphorylation.protein kinase (PEK) | External stimuli response.light.UV-B light.regulatory protein (RUP)	XP_004249856.1
Solyc07g055050	-1.05582	5.3354	0.00977412	0.473714	ATP synthase protein I-like protein			1.1.9.3.1	Photosynthesis.photophosphorylation.ATP synthase complex.assembly.assembly factor (CGL160)	XP_010323690.1
Solyc01g107900	0.75262	6.48549	0.00981119	0.474225	O-acyltransferase WSD1	GO:0004144|GO:0045017	diacylglycerol O-acyltransferase activity | glycerolipid biosynthetic process	35.1	not assigned.annotated	XP_004230765.1
Solyc05g056300	-0.835659	4.89192	0.00980944	0.474225	Thioredoxin	GO:0045454	cell redox homeostasis	10.5.4	Redox homeostasis.chloroplast redox homeostasis.F-type thioredoxin	XP_004239649.1
Solyc12g094640	-2.68576	1.00619	0.00983291	0.474634	Glyceraldehyde-3-phosphate dehydrogenase	GO:0016620|GO:0055114	oxidoreductase activity, acting on the aldehyde or oxo group of donors, NAD or NADP as acceptor | oxidation-reduction process	1.2.3	Photosynthesis.calvin cycle.glyceraldehyde 3-phosphate dehydrogenase	XP_004253122.1
Solyc09g089580	1.52951	12.9485	0.00986195	0.475394	2-oxoglutarate (2OG) and Fe(II)-dependent oxygenase superfamily protein	GO:0016491|GO:0055114	oxidoreductase activity | oxidation-reduction process	50.1.13	Enzyme classification.EC_1 oxidoreductases.EC_1.14 oxidoreductase acting on paired donor with incorporation or reduction of molecular oxygen	NP_001296142.1
Solyc04g055230	1.94385	-0.299145	0.00988946	0.475438	cystathionine beta-lyase			35.2	not assigned.not annotated	XP_004249212.1
Solyc09g008170	-5.16009	7.30602	0.00988829	0.475438	Small auxin up-regulated RNA69	GO:0009733	response to auxin	35.2	not assigned.not annotated	XP_004249795.1
Solyc11g007400	3.40675	0.00221525	0.00992178	0.476352	LOW QUALITY:Receptor-like protein kinase			35.1	not assigned.annotated	XP_025883938.1	AT1G70250.1
Solyc02g087750	0.764915	7.38002	0.0099437	0.476765	Ubiquitin-conjugating enzyme			19.2.2.1.4	Protein homeostasis.ubiquitin-proteasome system.ubiquitin-fold protein conjugation.ubiquitin conjugation (ubiquitylation).ubiquitin-conjugating E2 protein (UBC)	XP_004232235.1
Solyc03g121920	-0.93061	5.11381	0.01001	0.478661	Mitochondrial carrier protein	GO:0055085	transmembrane transport	24.2.13	Solute transport.carrier-mediated transport.solute transporter (MTCC)	XP_010318490.1
Solyc11g010480	-0.798089	5.41717	0.0100091	0.478661	Protein curvature thylakoid chloroplastic-like	GO:0009579	thylakoid	35.1	not assigned.annotated	XP_004250138.1
Solyc02g030464	5.43867	-3.10554	0.0100239	0.478683	Glucan endo-1,3-beta-glucosidase 8			35.2	not assigned.not annotated	NP_001343200.1
Solyc10g049420	2.38941	-0.770313	0.0100519	0.479384	TRAF-like superfamily protein			35.2	not assigned.not annotated	XP_004248987.1
Solyc01g100660	-1.059	4.26208	0.0100796	0.480064	Basic helix-loop-helix transcription factor	GO:0046983	protein dimerization activity	15.5.32	RNA biosynthesis.transcriptional regulation.transcription factor (bHLH)	XP_010313623.1
Solyc02g076710	0.944236	9.36955	0.0101057	0.480664	Cysteine protease	GO:0008234	cysteine-type peptidase activity	50.3.4	Enzyme classification.EC_3 hydrolases.EC_3.4 hydrolase acting on peptide bond (peptidase)	XP_004233038.1
Solyc07g065130	-4.47808	-2.58935	0.0101615	0.482039	Calcium-binding protein, putative	GO:0005488	binding	35.1	not assigned.annotated	XP_004244049.1
Solyc12g036793	2.29448	2.38624	0.0101532	0.482039	Leucine-rich repeat receptor-like protein kinase family protein	GO:0005515	protein binding	35.1	not assigned.annotated	XP_004252850.1
Solyc06g065300	5.31347	-2.71965	0.0102072	0.483139	U5 small nuclear ribonucleoprotein helicase	GO:0005515	protein binding	35.1	not assigned.annotated	XP_019069857.1
Solyc12g099980	4.2719	0.80436	0.0102117	0.483139	Leucine-rich repeat receptor-like protein kinase family protein	GO:0005515	protein binding	35.1	not assigned.annotated	XP_004253141.1
Solyc00g068970	1.52842	4.99672	0.0102499	0.483968	Senescence-associated protein			35.2	not assigned.not annotated	XP_025884627.1
Solyc04g010010	2.39215	-0.354394	0.0102563	0.483968	RNA-binding protein	GO:0003676	nucleic acid binding	35.1	not assigned.annotated	XP_010319276.1
Solyc06g008100	5.85321	-1.28597	0.0102805	0.48447	Unknown			35.2	not assigned.not annotated
Solyc01g081390	-0.706028	5.24068	0.0103086	0.484517	Glucose-6-phosphate/phosphate translocator	GO:0005215|GO:0006810|GO:0016021	transporter activity | transport | integral component of membrane	9.1.2.1.2 | 24.2.1.1.1	Secondary metabolism.terpenoids.methylerythritol phosphate (MEP) pathway.1-deoxy-d-xylulose 5-phosphate import.D-xylulose 5-phosphate transporter | Solute transport.carrier-mediated transport.DMT superfamily.NST-TPT group.phosphometabolite transporter (TPT|PPT|GPT|XPT)	XP_004229531.1
Solyc07g018144	-3.52587	-0.266764	0.010306	0.484517	DEAD/DEAH box RNA helicase family protein	GO:0003677	DNA binding	35.2	not assigned.not annotated	XP_010324936.1
Solyc04g081650	1.16851	2.4341	0.0103529	0.485438	Cyclin	GO:0005634	nucleus	35.1	not assigned.annotated	XP_004238428.1
Solyc09g010380	-1.20664	5.96016	0.0103553	0.485438	Soluble inorganic pyrophosphatase	GO:0000287|GO:0004427|GO:0005737|GO:0006796	magnesium ion binding | inorganic diphosphatase activity | cytoplasm | phosphate-containing compound metabolic process	35.1	not assigned.annotated	XP_010325885.1
Solyc02g071010	-3.20362	-2.32067	0.0103781	0.48587	Chlorophyll a-b binding protein, chloroplastic	GO:0009765|GO:0016020	photosynthesis, light harvesting | membrane	1.1.1.1.1	Photosynthesis.photophosphorylation.photosystem II.LHC-II complex.component LHCb1/2/3	NP_001333218.1	AT1G29930.1
Solyc01g016720	5.88683	-3.11431	0.0104051	0.485901	Disease resistance protein (TIR-NBS-LRR class) family			35.2	not assigned.not annotated	XP_025884827.1
Solyc01g088400	-2.03709	9.92257	0.0104367	0.485901	ECERIFERUM 1	GO:0005506|GO:0006633|GO:0016491|GO:0055114	iron ion binding | fatty acid biosynthetic process | oxidoreductase activity | oxidation-reduction process	21.9.1.7.1.1	Cell wall organisation.cutin and suberin.cuticular lipid formation.alkane-forming pathway.CER1-CER3 alkane-forming complex.aldehyde decarbonylase component CER1	XP_019071187.1
Solyc02g078400	1.74713	8.94594	0.0104484	0.485901	allantoinase	GO:0016810	hydrolase activity, acting on carbon-nitrogen (but not peptide) bonds	6.1.4.8	Nucleotide metabolism.purines.catabolism.allantoinase	XP_004232860.1
Solyc03g070430	1.82472	0.151549	0.0104603	0.485901	Pentatricopeptide repeat (PPR) superfamily protein			35.2	not assigned.not annotated	XP_025888054.1
Solyc06g005710	-1.19353	3.60858	0.0104543	0.485901	Protein plastid transcriptionally active 16, chloroplastic			15.6.1.2.3.6	RNA biosynthesis.organelle machinery.RNA polymerase activities.plastid-encoded RNA polymerase (PEP) complex.regulatory co-factor components.component TAC16	XP_004240374.1
Solyc10g006720	4.68996	1.99579	0.0104502	0.485901	Serine/threonine-protein kinase	GO:0048544	recognition of pollen	18.4.1.24.1	Protein modification.phosphorylation.TKL protein kinase superfamily.G-Lectin protein kinase families.protein kinase (SD-1)	XP_019071434.1
Solyc05g054860	0.813807	6.17441	0.0104773	0.486062	Kinase, putative	GO:0005524	ATP binding	11.10.2.4.2 | 18.4.1.16	Phytohormone action.signalling peptides.CRP (cysteine-rich-peptide) category.RALF/RALFL-peptide activity.RALF-peptide receptor (CrRLK1L) | Protein modification.phosphorylation.TKL protein kinase superfamily.protein kinase (CrlRLK1)	XP_004239762.1	AT3G46290.1
Solyc02g085880	-3.12143	-1.98882	0.0105146	0.487156	Cytochrome P450, putative	GO:0005506|GO:0016705|GO:0020037|GO:0055114	iron ion binding | oxidoreductase activity, acting on paired donors, with incorporation or reduction of molecular oxygen | heme binding | oxidation-reduction process	50.1.13 | 11.3.1.4	Enzyme classification.EC_1 oxidoreductases.EC_1.14 oxidoreductase acting on paired donor with incorporation or reduction of molecular oxygen | Phytohormone action.brassinosteroid.biosynthesis.3-epi-6-deoxocathasterone 23-monooxygenase	XP_010315862.1
Solyc01g008050	6.1815	-1.17019	0.0105531	0.488029	Trichome birefringence-like 27	GO:0005794|GO:0010411|GO:0016413	Golgi apparatus | xyloglucan metabolic process | O-acetyltransferase activity	21.2.1.2.2	Cell wall organisation.hemicellulose.xyloglucan.modification and degradation.xyloglucan O-acetyltransferase (AXY4)	XP_004228546.1
Solyc05g051580	-6.12283	-2.65556	0.0105607	0.488029	Phototropic-responsive NPH3 family protein	GO:0005515	protein binding	35.1	not assigned.annotated	XP_004240016.1
Solyc09g005190	3.77519	-2.12705	0.0106356	0.490859	Kinase, putative	GO:0004672|GO:0005524|GO:0006468	protein kinase activity | ATP binding | protein phosphorylation	50.2.7	Enzyme classification.EC_2 transferases.EC_2.7 transferase transferring phosphorus-containing group	XP_010325784.1
Solyc03g120570	-1.52559	8.72804	0.0106585	0.491279	Major facilitator superfamily protein	GO:0005215|GO:0006810|GO:0016020	transporter activity | transport | membrane	24.2.2.9	Solute transport.carrier-mediated transport.MFS superfamily.anion transporter (NRT1/PTR)	XP_025885995.1
Solyc04g064880	4.0064	5.08085	0.0107388	0.493074	Pathogen-related protein			35.1	not assigned.annotated	XP_004237745.1
Solyc08g005940	-4.27927	-2.40035	0.0107236	0.493074	Proteinase inhibitor II	GO:0000226|GO:0005516|GO:0005874|GO:0008017	microtubule cytoskeleton organization | calmodulin binding | microtubule | microtubule binding	35.2	not assigned.not annotated	XP_010326858.1
Solyc12g096550	-0.833163	6.08871	0.0107388	0.493074	Pheophorbide a oxygenase	GO:0016491|GO:0051537|GO:0055114	oxidoreductase activity | 2 iron, 2 sulfur cluster binding | oxidation-reduction process	23.1.3.5.2	Protein translocation.chloroplast.inner envelope TIC translocation system.redox regulon complex.component Tic55	XP_004253048.1
Solyc04g008040	-2.20824	2.24114	0.0108169	0.495861	Microtubule-associated protein 70-2	GO:0007010|GO:0008017	cytoskeleton organization | microtubule binding	35.1	not assigned.annotated	XP_010319385.1
Solyc09g091670	4.64271	5.15139	0.0108272	0.495861	Pleiotropic drug resistance ABC transporter	GO:0016020	membrane	24.1.3.2.2	Solute transport.primary active transport.ABC superfamily.ABC2 family.subfamily ABCG transporter	XP_004247842.1
Solyc01g067130	5.76128	-0.348947	0.0109143	0.497936	Nuclear transcription factor Y protein	GO:0046982	protein heterodimerization activity	15.5.51.2	RNA biosynthesis.transcriptional regulation.NF-Y transcription factor complex.component NF-YB	XP_019068761.1
Solyc05g006650	-0.924097	4.92948	0.0108899	0.497936	bHLH transcription factor 036	GO:0046983	protein dimerization activity	15.5.32 | 26.1.2.1.2	RNA biosynthesis.transcriptional regulation.transcription factor (bHLH) | External stimuli response.light.UV-A/blue light.cryptochrome-mediated photoperception.transcriptional regulator (CIB)	XP_004238742.1
Solyc09g066070	2.77037	2.61411	0.0109042	0.497936	Homeobox leucine zipper protein	GO:0008289	lipid binding	15.5.3.3	RNA biosynthesis.transcriptional regulation.Homeobox transcription factor superfamily.transcription factor (HD-ZIP IV)	XP_004247342.2
Solyc12g098890	-0.962338	5.00494	0.0109282	0.497937	50S ribosomal protein L18	GO:0003735|GO:0005622|GO:0005840|GO:0006412	structural constituent of ribosome | intracellular | ribosome | translation	17.7.2.1.16	Protein biosynthesis.organelle machinery.plastidial ribosome.large ribosomal subunit proteome.component psRPL18	XP_004252957.1
Solyc02g083020	-2.95628	-1.90199	0.0109849	0.498614	LOW QUALITY:DUF241 domain protein			35.2	not assigned.not annotated	XP_004233752.1	AT4G35690.1
Solyc08g076290	-2.6974	-0.749367	0.0109716	0.498614	Inner membrane yohK			1.3.8 | 24.2.19	Photosynthesis.photorespiration.glycerate:glycolate transporter | Solute transport.carrier-mediated transport.glycerate:glycolate transporter (PLGG1)	XP_004245932.1
Solyc08g076970	-1.02469	6.93727	0.0109591	0.498614	Acetylornithine deacetylase	GO:0008152|GO:0016787	metabolic process | hydrolase activity	4.1.1.1.1.6	Amino acid metabolism.biosynthesis.glutamate family.glutamate-derived amino acids.ornithine.N2-acetylornithine deacetylase	NP_001316163.1
Solyc05g051290	-1.2288	2.35745	0.011031	0.500071	HMG-Y-related A	GO:0003677|GO:0005634	DNA binding | nucleus	35.1	not assigned.annotated	XP_004240031.1
Solyc01g021720	2.82359	-1.83964	0.0110991	0.502524	LOW QUALITY:Cysteine/Histidine-rich C1 domain family protein			35.2	not assigned.not annotated	XP_004236731.1
Solyc05g010550	5.52809	-2.97336	0.0111276	0.503174	LOW QUALITY:1-acyl-sn-glycerol-3-phosphate acyltransferase 2			35.2	not assigned.not annotated	XP_004240425.1
Solyc10g050980	-3.87815	0.486505	0.0111436	0.503262	PAB-dependent poly(A)-specific ribonuclease subunit PAN2			35.2	not assigned.not annotated	XP_004246648.1
Solyc05g051050	0.853985	5.17302	0.0111694	0.503793	Kinase family protein	GO:0005524	ATP binding	11.3.2.3 | 18.4.3.4	Phytohormone action.brassinosteroid.perception and signal transduction.GSK3-type protein kinase (BIN2) | Protein modification.phosphorylation.CMGC protein kinase superfamily.protein kinase (GSK)	XP_004240041.1
Solyc11g027645	1.87531	5.17304	0.0111837	0.503804	Ribosomal RNA small subunit methyltransferase B			35.2	not assigned.not annotated	XP_004237501.1
Solyc01g104720	0.878399	9.88149	0.0112135	0.504508	thionin-like protein			35.2	not assigned.not annotated	XP_004235702.1
Solyc06g066420	-3.79902	0.745532	0.0114397	0.512784	Oxidative stress 3, putative isoform 1			35.2	not assigned.not annotated	XP_004241752.2
Solyc08g014000	1.53989	9.58671	0.0114404	0.512784	lipoxygenase A	GO:0016702|GO:0046872|GO:0055114	oxidoreductase activity, acting on single donors with incorporation of molecular oxygen, incorporation of two atoms of oxygen | metal ion binding | oxidation-reduction process	50.1.12	Enzyme classification.EC_1 oxidoreductases.EC_1.13 oxidoreductase acting on single donor with incorporation of molecular oxygen (oxygenase)	NP_001234856.1
Solyc08g081620	2.41962	4.60966	0.0114216	0.512784	LEU13054 endo-1,4-beta-glucanase precursor	GO:0004553|GO:0005975	hydrolase activity, hydrolyzing O-glycosyl compounds | carbohydrate metabolic process	35.1	not assigned.annotated	NP_001234862.1
Solyc05g026470	-4.22147	-3.08328	0.011526	0.515972	transcriptional corepressor LEUNIG	GO:0005515	protein binding	35.1	not assigned.annotated	XP_004239602.1
Solyc02g077590	1.61251	5.046	0.0115827	0.516237	Homeobox-leucine zipper protein family	GO:0006355|GO:0043565	regulation of transcription, DNA-templated | sequence-specific DNA binding	15.5.3.1	RNA biosynthesis.transcriptional regulation.Homeobox transcription factor superfamily.transcription factor (HD-ZIP I/II)	XP_004233839.3	AT5G53980.1
Solyc08g007240	-1.31347	7.17196	0.0115833	0.516237	Nudix hydrolase	GO:0016787	hydrolase activity	35.1	not assigned.annotated	XP_004244559.1
Solyc10g080210	-2.08842	12.5752	0.0115897	0.516237	polygalacturonase	GO:0004650|GO:0005975	polygalacturonase activity | carbohydrate metabolic process	21.3.5.1.1	Cell wall organisation.pectin.modification and degradation.polygalacturonase activities.polygalacturonase (QRT2)	NP_001234021.1
Solyc10g086410	0.883495	6.72293	0.0115653	0.516237	LEHSC270 hsc-2heat shock protein cognate 70			19.1.5.1	Protein homeostasis.protein quality control.cytosolic Hsp70 chaperone system.chaperone (Hsp70)	NP_001334878.1
Solyc09g075480	-1.50492	3.96783	0.011613	0.516636	Kinesin-like protein	GO:0005515	protein binding	20.1.3.12	Cytoskeleton organisation.microtubular network.Kinesin microtubule-based motor protein activities.motor protein (Kinesin-14)	XP_004247392.1
Solyc06g076030	2.05877	-0.590019	0.0116502	0.517362	Dof zinc finger protein	GO:0003677|GO:0006355	DNA binding | regulation of transcription, DNA-templated	15.5.1.5	RNA biosynthesis.transcriptional regulation.C2C2 transcription factor superfamily.transcription factor (DOF)	XP_004241234.1
Solyc07g042520	-7.65743	-2.28074	0.0116583	0.517362	Sucrose synthase	GO:0005985|GO:0016157	sucrose metabolic process | sucrose synthase activity	3.1.4.2	Carbohydrate metabolism.sucrose metabolism.degradation.sucrose synthase	XP_004243680.1
Solyc09g097770	4.03164	2.00916	0.0116839	0.517855	Glycine-rich protein			35.2	not assigned.not annotated	NP_001234188.1
Solyc02g081440	-3.57861	-1.93845	0.0117194	0.518146	microsomal glutathione s-transferase			35.1	not assigned.annotated	XP_004233775.1
Solyc07g006570	-1.62291	2.53716	0.0117083	0.518146	Ribonuclease	GO:0003723|GO:0033897	RNA binding | ribonuclease T2 activity	35.2	not assigned.not annotated	XP_004242665.1
Solyc06g068390	-2.12997	1.75839	0.011774	0.51935	LOW QUALITY:Zinc finger protein, putative	GO:0046872	metal ion binding	15.5.15	RNA biosynthesis.transcriptional regulation.transcription factor (C2H2-ZF)	XP_004241683.1	AT5G10970.1
Solyc12g042770	-0.876634	7.05453	0.0117757	0.51935	post-illumination chlorophyll fluorescence increase			35.2	not assigned.not annotated	XP_025884425.1
Solyc01g109790	-1.43078	4.52509	0.0118073	0.520104	ADP-glucose pyrophosphorylase large subunit 1	GO:0009058|GO:0016779	biosynthetic process | nucleotidyltransferase activity	3.2.2.3	Carbohydrate metabolism.starch metabolism.biosynthesis.ADP-glucose pyrophosphorylase	NP_001233918.2
Solyc08g068860	3.24826	1.72262	0.0118568	0.521642	Eukaryotic aspartyl protease family protein	GO:0004190|GO:0006508	aspartic-type endopeptidase activity | proteolysis	19.4.3.1	Protein homeostasis.proteolysis.aspartic-type peptidase activities.A1-class protease (Pepsin)	XP_004245293.1
Solyc08g062210	-0.760075	5.93147	0.0119103	0.52335	Nuclear transcription factor Y subunit	GO:0003700|GO:0006355	DNA-binding transcription factor activity | regulation of transcription, DNA-templated	15.5.51.1	RNA biosynthesis.transcriptional regulation.NF-Y transcription factor complex.component NF-YA	XP_004245059.1
Solyc05g006360	5.3044	-3.18235	0.0119494	0.524244	Metalloendoproteinase 1, putative	GO:0008237|GO:0008270	metallopeptidase activity | zinc ion binding	19.4.5.3	Protein homeostasis.proteolysis.metallopeptidase activities.M10-class metalloprotease (Matrixin)	XP_010320628.1	AT1G24140.1
Solyc10g018900	1.115	2.49945	0.0119599	0.524244	Histone-lysine N-methyltransferase ATX5			35.2	not assigned.not annotated	XP_010318013.1
Solyc01g006460	-5.38321	-1.07086	0.0119775	0.524372	Non-structural maintenance of chromosome element 4	GO:0005634|GO:0006281|GO:0030915	nucleus | DNA repair | Smc5-Smc6 complex	14.3.6.2.1	DNA damage response.homologous recombination repair (HR).Smc5-Smc6 complex.NSE1-NSE3-NSE4 subcomplex.Kleisin-like bridging component NSE4	XP_025885012.1
Solyc04g081320	-0.951636	4.38084	0.0121007	0.528473	Protein disulfide-isomerase LQY1, chloroplastic	GO:0031072|GO:0051082	heat shock protein binding | unfolded protein binding	1.1.1.3.21 | 18.11.2.2	Photosynthesis.photophosphorylation.photosystem II.assembly and maintenance.assembly factor (LQY1) | Protein modification.disulfide bond formation.chloroplast.protein disulfide isomerase (LQY1)	XP_004238349.1
Solyc06g065570	0.744209	6.83226	0.01209	0.528473	acyl-CoA N-acyltransferases (NAT) superfamily protein	GO:0008080	N-acetyltransferase activity	18.2.5	Protein modification.acetylation.N-terminal acetylase (NatE)	NP_001333065.1
Solyc09g061827	5.62697	-2.72126	0.0121745	0.531046	F-box associated interaction domain-containing protein			35.2	not assigned.not annotated	XP_004234618.1
Solyc12g009770	5.28236	0.404243	0.0121933	0.531219	LOW QUALITY:Leucine-rich-repeat receptor-like protein	GO:0005515	protein binding	35.1	not assigned.annotated	XP_010313803.1	AT4G13920.1
Solyc07g043610	-0.694538	4.87862	0.0122724	0.534014	Auxin response factor_SGN-U230670	GO:0005515	protein binding	15.5.5.1	RNA biosynthesis.transcriptional regulation.B3 transcription factor superfamily.transcription factor (ARF)	NP_001234663.1
Solyc09g007850	-0.897954	7.89159	0.0123103	0.535012	RNA binding protein	GO:0003676	nucleic acid binding	35.1	not assigned.annotated	XP_004246655.1
Solyc01g100810	-0.848719	4.76816	0.0123749	0.537166	Neutral/alkaline invertase	GO:0033926	glycopeptide alpha-N-acetylgalactosaminidase activity	3.1.4.1.3	Carbohydrate metabolism.sucrose metabolism.degradation.invertase activities.alkaline sucrose-specific invertase (CIN)	XP_004230329.1
Solyc01g096860	-3.2421	-2.25766	0.0124477	0.538368	AP2-like ethylene-responsive transcription factor	GO:0003700|GO:0006355|GO:0007275	DNA-binding transcription factor activity | regulation of transcription, DNA-templated | multicellular organism development	15.5.7.3	RNA biosynthesis.transcriptional regulation.AP2/ERF transcription factor superfamily.transcription factor (AP2)	XP_004231231.1
Solyc03g033690	-6.42795	-3.00096	0.0124406	0.538368	Peroxidase	GO:0004601|GO:0055114	peroxidase activity | oxidation-reduction process	21.6.2.3	Cell wall organisation.lignin.monolignol conjugation and polymerization.lignin peroxidase	XP_004234603.1
Solyc08g080270	5.84248	-1.71621	0.0124436	0.538368	UDP-galactose transporter	GO:0055085	transmembrane transport	24.2.1.1.5	Solute transport.carrier-mediated transport.DMT superfamily.NST-TPT group.nucleotide sugar transporter (UTR1|5)	XP_004245653.1
Solyc10g077040	-0.895434	5.23081	0.0124658	0.538496	putative magnesium-protoporphyrin monomethyl ester cyclase	GO:0016491|GO:0046872|GO:0055114	oxidoreductase activity | metal ion binding | oxidation-reduction process	7.12.6.3.1	Coenzyme metabolism.tetrapyrrol biosynthesis.chlorophyll metabolism.Mg-protoporphyrin IX monomethylester cyclase complex.catalytic component CRD1	NP_001332768.1
Solyc07g044970	-4.91779	-2.59408	0.0125278	0.538715	LOW QUALITY:P-loop containing nucleoside triphosphate hydrolases superfamily protein			35.2	not assigned.not annotated	XP_004234506.1
Solyc07g053900	-3.83604	-3.27223	0.0125158	0.538715	DUF506 family protein			35.2	not assigned.not annotated	XP_004243359.1	AT4G32480.1
Solyc10g008655	-1.37744	2.98281	0.0125311	0.538715	Anthocyanin 5-aromatic acyltransferase	GO:0016747	transferase activity, transferring acyl groups other than amino-acyl groups	35.1	not assigned.annotated	XP_025883531.1
Solyc12g021150	-6.33875	-3.05111	0.0124905	0.538715	Sulfotransferase	GO:0008146	sulfotransferase activity	50.2.8	Enzyme classification.EC_2 transferases.EC_2.8 transferase transferring sulfur-containing group	XP_004253506.1	AT2G03770.1
Solyc03g032240	1.25955	0.920703	0.012584	0.540342	Cation/H() antiporter	GO:0006812|GO:0015299|GO:0016021|GO:0055085	cation transport | solute:proton antiporter activity | integral component of membrane | transmembrane transport	24.2.8.2.1	Solute transport.carrier-mediated transport.CPA superfamily.CPA-2 family.proton:monovalent cation antiporter (CHX)	XP_004234519.1
Solyc10g081480	0.71507	7.06292	0.0126338	0.541831	maltase-glucoamylase, intestinal protein			35.2	not assigned.not annotated	XP_004249372.1
Solyc02g071475	3.88265	0.130541	0.0126719	0.541868	2-oxoglutarate (2OG) and Fe(II)-dependent oxygenase superfamily protein	GO:0016491|GO:0055114	oxidoreductase activity | oxidation-reduction process	50.1.13	Enzyme classification.EC_1 oxidoreductases.EC_1.14 oxidoreductase acting on paired donor with incorporation or reduction of molecular oxygen	XP_019067813.1
Solyc02g091040	2.18969	1.8032	0.0127091	0.541868	myb domain protein 76			35.2	not assigned.not annotated	XP_004245562.1
Solyc07g008910	0.776205	4.34051	0.0126576	0.541868	Thioredoxin superfamily protein			35.2	not assigned.not annotated	XP_004242828.1
Solyc10g008650	-2.59928	-1.92184	0.0126956	0.541868	LOW QUALITY:Anthocyanin 5-aromatic acyltransferase			35.1	not assigned.annotated	XP_025883531.1
Solyc12g006140	-2.51163	1.1117	0.0127255	0.541868	Cab-5 gene encoding chlorophyll a/b-binding protein	GO:0009765|GO:0016020	photosynthesis, light harvesting | membrane	1.1.1.1.1	Photosynthesis.photophosphorylation.photosystem II.LHC-II complex.component LHCb1/2/3	NP_001295874.1
Solyc12g088870	4.11821	-1.37166	0.0127256	0.541868	PHD finger transcription factor			35.2	not assigned.not annotated	XP_004248248.1
Solyc05g009310	-2.46711	1.56711	0.0127628	0.542162	CONSTANS-like zinc finger protein	GO:0005622|GO:0008270	intracellular | zinc ion binding	15.5.1.2	RNA biosynthesis.transcriptional regulation.C2C2 transcription factor superfamily.transcription factor (BBX-CO)	XP_004238926.1
Solyc08g005960	-2.26561	2.43836	0.0127529	0.542162	Bifunctional inhibitor/lipid-transfer protein/seed storage 2S albumin superfamily protein			35.1	not assigned.annotated	XP_004244453.1
Solyc01g087010	-5.97492	-2.98494	0.0127928	0.54279	Carbohydrate esterase plant-like protein			35.1	not assigned.annotated	XP_004231114.1
Solyc11g010350	-1.12662	2.66157	0.0128098	0.542869	Glucan 1,3-beta-glucosidase	GO:0007015|GO:0051015	actin filament organization | actin filament binding	35.2	not assigned.not annotated	XP_004250125.1
Solyc02g068660	-3.64275	-1.31063	0.0129494	0.547961	Kinase, putative	GO:0030247	polysaccharide binding	18.4.1.25	Protein modification.phosphorylation.TKL protein kinase superfamily.protein kinase (WAK/WAKL)	XP_010317039.1
Solyc06g083690	-0.802195	4.98533	0.0129606	0.547961	Glutaredoxin family protein	GO:0045454	cell redox homeostasis	1.1.4.2.5 | 18.8.2	Photosynthesis.photophosphorylation.photosystem I.PS-I complex.component PsaE | Protein modification.S-glutathionylation.glutaredoxin	XP_010323070.1
Solyc10g086580	-0.865723	7.52854	0.0129901	0.548559	Ribulose bisphosphate carboxylase/oxygenase activase	GO:0005524	ATP binding	1.2.1.3.2	Photosynthesis.calvin cycle.ribulose-1,5-bisphosphat carboxylase/oxygenase (RuBisCo) activity.RuBisCo regulation.ATP-dependent activase (RCA)	XP_010312360.2
Solyc08g079110	-0.896456	4.91534	0.0130918	0.5522	Thylakoid lumenal protein			35.1	not assigned.annotated	XP_004245736.1
Solyc03g094120	3.68852	1.24602	0.0131463	0.553846	Glycosyltransferase			35.1	not assigned.annotated	XP_010318206.1
Solyc04g078790	-3.02935	2.01277	0.0132313	0.556772	basic helix-loop-helix (bHLH) DNA-binding superfamily protein	GO:0046983	protein dimerization activity	15.5.32	RNA biosynthesis.transcriptional regulation.transcription factor (bHLH)	XP_004238146.1
Solyc00g207960	5.15887	-1.8722	0.0132714	0.557149	LOW QUALITY:ZF-HD homeobox protein	GO:0003677	DNA binding	15.5.3.13	RNA biosynthesis.transcriptional regulation.Homeobox transcription factor superfamily.transcription factor (zf-HD)	XP_010314609.1
Solyc04g015750	-1.29794	6.35669	0.0132644	0.557149	Magnesium chelatase H subunit	GO:0016851	magnesium chelatase activity	7.12.6.1.2 | 11.1.2.2.1	Coenzyme metabolism.tetrapyrrol biosynthesis.chlorophyll metabolism.magnesium-chelatase complex.component CHL-H | Phytohormone action.abscisic acid.perception and signalling.membrane-localized receptors.chloroplast envelope-localized receptor (ABAR)	XP_004236610.1
Solyc08g068850	1.90509	3.20266	0.0133111	0.557637	Proton pump interactor 1	GO:0005783|GO:0005886|GO:0010155	endoplasmic reticulum | plasma membrane | regulation of proton transport	24.1.4	Solute transport.primary active transport.VHP PPase family	NP_001316136.1
Solyc09g055715	5.49309	-2.88092	0.0133142	0.557637	aluminum induced protein with YGL and LRDR motifs			35.2	not assigned.not annotated	XP_025883729.1
Solyc09g091000	4.64468	6.3647	0.0133327	0.557761	Major allergen d 1	GO:0006952|GO:0009607	defense response | response to biotic stimulus	35.1	not assigned.annotated	NP_001310248.1
Solyc06g053440	-5.59581	-2.64195	0.0133653	0.557966	Serine/Threonine-kinase			35.2	not assigned.not annotated	XP_004240997.1
Solyc12g077620	6.12053	-2.82142	0.0133688	0.557966	LOW QUALITY:NAD(P)-binding Rossmann-fold superfamily protein			35.2	not assigned.not annotated	XP_025886103.1
Solyc04g007950	-1.44232	3.40691	0.0134301	0.559869	Cysteine-rich repeat secretory 12-like protein			26.10.1.1	External stimuli response.virus.virus movement.plasmodesmal protein (PDLP)	XP_004236934.1
Solyc01g006020	-1.00986	5.27614	0.0134763	0.561141	6,7-dimethyl-8-ribityllumazine synthase			35.2	not assigned.not annotated	XP_004228682.1
Solyc02g083490	-6.61263	-2.33907	0.0134962	0.561317	Peroxidase	GO:0004601|GO:0042744	peroxidase activity | hydrogen peroxide catabolic process	35.1	not assigned.annotated	XP_004232514.1
Solyc07g052175	5.62076	-1.95514	0.0135212	0.561678	LOW QUALITY:splicing factor Prp18 family protein	GO:0005681|GO:0008380	spliceosomal complex | RNA splicing	35.2	not assigned.not annotated	XP_004247169.1
Solyc08g079285	-2.30245	-2.19183	0.0135363	0.561678	Cytochrome P450 family protein	GO:0016705|GO:0055114	oxidoreductase activity, acting on paired donors, with incorporation or reduction of molecular oxygen | oxidation-reduction process	50.1.13	Enzyme classification.EC_1 oxidoreductases.EC_1.14 oxidoreductase acting on paired donor with incorporation or reduction of molecular oxygen	XP_004245721.1
Solyc09g083445	-2.30216	1.40105	0.0136029	0.563789	Proteinase inhibitor 1	GO:0004867|GO:0009611	serine-type endopeptidase inhibitor activity | response to wounding	35.1	not assigned.annotated	XP_004247658.1
Solyc08g080430	6.34117	-3.083	0.0137096	0.567554	Cytochrome P450 family protein	GO:0016705|GO:0055114	oxidoreductase activity, acting on paired donors, with incorporation or reduction of molecular oxygen | oxidation-reduction process	50.1.13	Enzyme classification.EC_1 oxidoreductases.EC_1.14 oxidoreductase acting on paired donor with incorporation or reduction of molecular oxygen	XP_004246127.1
Solyc01g102270	-1.11333	3.3205	0.0138025	0.570738	Jojoba acyl CoA reductase-related male sterility protein			35.1	not assigned.annotated	XP_025885628.1	AT3G05870.1
Solyc07g062670	1.2282	6.49829	0.0138622	0.572545	LOW QUALITY:Clavata3/ESR (CLE) gene family member			11.10.1.10.1	Phytohormone action.signalling peptides.NCRP (non-cysteine-rich-peptide) category.CLE-peptide activity.CLE-precursor protein	XP_004229392.1
Solyc10g005360	-1.99457	3.00345	0.0139078	0.573763	Gibberellin 2-beta-dioxygenase	GO:0016491|GO:0055114	oxidoreductase activity | oxidation-reduction process	50.1.13	Enzyme classification.EC_1 oxidoreductases.EC_1.14 oxidoreductase acting on paired donor with incorporation or reduction of molecular oxygen	XP_019071408.1
Solyc09g089750	1.82018	3.99707	0.0139288	0.573968	2-oxoglutarate (2OG) and Fe(II)-dependent oxygenase superfamily protein			35.1	not assigned.annotated	XP_004247706.1	AT1G06650.2
Solyc10g005050	-0.847097	6.20872	0.013989	0.575786	Thylakoid membrane phosphoprotein, chloroplastic	GO:0009579	thylakoid	35.1	not assigned.annotated	XP_004248418.1
Solyc07g052480	-2.14269	0.188606	0.0140309	0.576538	isocitrate lyase LEU18678	GO:0004451|GO:0019752	isocitrate lyase activity | carboxylic acid metabolic process	5.7.3.6.3	Lipid metabolism.lipid degradation.fatty acid degradation.glyoxylate cycle.isocitrate lyase	NP_001233878.2
Solyc11g027670	2.1387	-0.750243	0.0140403	0.576538	LOW QUALITY:Cytochrome P450 like_TBP			35.2	not assigned.not annotated	XP_004247896.2
Solyc12g006460	-1.94959	3.37917	0.0140556	0.576538	Cytochrome P450	GO:0016705|GO:0055114	oxidoreductase activity, acting on paired donors, with incorporation or reduction of molecular oxygen | oxidation-reduction process	50.1.13	Enzyme classification.EC_1 oxidoreductases.EC_1.14 oxidoreductase acting on paired donor with incorporation or reduction of molecular oxygen	XP_010313690.1
Solyc08g081570	-0.672763	5.42267	0.0141067	0.577357	2-C-methyl-D-erythritol 2,4-cyclodiphosphate synthase	GO:0008685|GO:0016114	2-C-methyl-D-erythritol 2,4-cyclodiphosphate synthase activity | terpenoid biosynthetic process	9.1.2.6	Secondary metabolism.terpenoids.methylerythritol phosphate (MEP) pathway.2-C-methyl-D-erythritol 2,4-cyclodiphosphate synthase	XP_004245566.1
Solyc09g007190	-0.872491	4.55212	0.0141079	0.577357	Thioredoxin superfamily protein			35.1	not assigned.annotated	XP_004246708.1
Solyc02g068470	5.07566	-0.291293	0.0141481	0.57825	LOW QUALITY:VQ motif-containing protein, putative			26	External stimuli response	XP_010323951.1
Solyc04g080380	-2.52151	-0.425531	0.014162	0.57825	Leucine carboxyl methyltransferase	GO:0008168|GO:0032259	methyltransferase activity | methylation	35.2	not assigned.not annotated	XP_004238261.1
Solyc10g008740	-0.879792	5.75875	0.0142243	0.58013	Mg-protoporphyrin IX chelatase	GO:0005524|GO:0015995|GO:0016851	ATP binding | chlorophyll biosynthetic process | magnesium chelatase activity	7.12.6.1.3	Coenzyme metabolism.tetrapyrrol biosynthesis.chlorophyll metabolism.magnesium-chelatase complex.component CHL-I	XP_004248139.1
Solyc09g057903	5.45085	-3.31051	0.0142414	0.580167	Type I inositol-1,4,5-trisphosphate 5-phosphatase			35.2	not assigned.not annotated	XP_025884617.1
Solyc11g040173	1.34745	0.48408	0.01426	0.580262	RING/U-box superfamily protein			35.2	not assigned.not annotated	XP_004231848.1
Solyc04g083140	4.77786	4.44412	0.014317	0.581259	Cytochrome P450	GO:0016705|GO:0055114	oxidoreductase activity, acting on paired donors, with incorporation or reduction of molecular oxygen | oxidation-reduction process	50.1.13	Enzyme classification.EC_1 oxidoreductases.EC_1.14 oxidoreductase acting on paired donor with incorporation or reduction of molecular oxygen	XP_004237369.1
Solyc12g006040	0.873223	4.11657	0.0143158	0.581259	NBS-LRR protein	GO:0043531	ADP binding	35.1	not assigned.annotated	XP_025884479.1
Solyc06g060310	-1.0992	3.23792	0.0143654	0.581759	Chlorophyllide a oxygenase	GO:0016491|GO:0051537|GO:0055114	oxidoreductase activity | 2 iron, 2 sulfur cluster binding | oxidation-reduction process	7.12.6.6.1	Coenzyme metabolism.tetrapyrrol biosynthesis.chlorophyll metabolism.chlorophyll(ide) interconversions.chlorophyllide a oxygenase	XP_004242029.1
Solyc06g074510	-1.13232	2.66697	0.0143565	0.581759	Phosphoglycerate mutase, putative	GO:0003824|GO:0008152	catalytic activity | metabolic process	1.2.1.3.4	Photosynthesis.calvin cycle.ribulose-1,5-bisphosphat carboxylase/oxygenase (RuBisCo) activity.RuBisCo regulation.carboxy-D-arabinitol-1-phosphatase (CA1PP)	XP_004241306.1
Solyc09g007010	3.7561	3.09205	0.0143781	0.581759	Pathogenesis-related protein 1	GO:0005576	extracellular region	35.1	not assigned.annotated	NP_001234523.1	AT4G33720.1
Solyc07g065500	-1.84784	2.2658	0.0143978	0.581899	CCAAT-binding transcription factor	GO:0046982	protein heterodimerization activity	15.5.51.2	RNA biosynthesis.transcriptional regulation.NF-Y transcription factor complex.component NF-YB	XP_004244067.1
Solyc01g080280	-1.53169	3.2066	0.0144577	0.582053	chloroplast glutamine synthetase	GO:0004356|GO:0006807	glutamate-ammonia ligase activity | nitrogen compound metabolic process	25.1.5.1.2	Nutrient uptake.nitrogen assimilation.ammonium assimilation.glutamine synthetase activities.plastidial glutamine synthetase (GLN2)	NP_001310599.1
Solyc02g084720	-1.08698	5.83633	0.0144705	0.582053	beta-galactosidase 6	GO:0030246	carbohydrate binding	21.3.2.2.2	Cell wall organisation.pectin.rhamnogalacturonan I.modification and degradation.beta-galactosidase (BGAL)	NP_001234317.1
Solyc06g054260	-1.05679	7.04121	0.0144373	0.582053	photosystem 1 reaction center protein subunit 2	GO:0009522|GO:0009538|GO:0015979	photosystem I | photosystem I reaction center | photosynthesis	1.1.4.2.4	Photosynthesis.photophosphorylation.photosystem I.PS-I complex.component PsaD	NP_001295880.1	AT1G03130.1
Solyc09g007560	-0.831744	6.29786	0.0144726	0.582053	50S ribosomal protein L5	GO:0003735|GO:0005622|GO:0005840|GO:0006412	structural constituent of ribosome | intracellular | ribosome | translation	17.7.2.1.5	Protein biosynthesis.organelle machinery.plastidial ribosome.large ribosomal subunit proteome.component psRPL5	XP_004246669.1
Solyc12g033020	5.57249	-3.23237	0.014483	0.582053	LOW QUALITY:NAD(P)H-quinone oxidoreductase subunit 2, chloroplastic			35.1	not assigned.annotated	YP_008563149.1	ATCG01250.1
Solyc02g005140	1.18524	1.51379	0.0145983	0.585025	GPI-anchored adhesin-like protein, putative (Protein of unknown function, DUF547)			35.2	not assigned.not annotated	XP_004244510.1
Solyc04g077870	0.989929	3.81068	0.0146224	0.585025	Calcium-transporting ATPase	GO:0016021	integral component of membrane	24.1.2.2.2	Solute transport.primary active transport.P-type ATPase superfamily.P2 family.P2B-type calcium cation-transporting ATPase (ACA)	XP_010320298.1
Solyc10g011760	-1.36434	1.67809	0.0146156	0.585025	Aldose 1-epimerase, putative	GO:0005975|GO:0016853	carbohydrate metabolic process | isomerase activity	35.1	not assigned.annotated	XP_010326993.1
Solyc12g056360	3.06187	2.65067	0.0146127	0.585025	Thaumatin-like protein			26.8	External stimuli response.pathogen	XP_010314488.1	AT4G11650.1
Solyc01g106400	-2.18125	-0.268878	0.0146685	0.585563	Methionine sulfoxide reductase, putative	GO:0033743|GO:0055114	peptide-methionine (R)-S-oxide reductase activity | oxidation-reduction process	35.1	not assigned.annotated	XP_004230652.1
Solyc10g086565	-1.13041	2.66287	0.0146546	0.585563	S-acyltransferase			35.1	not assigned.annotated	XP_010312357.1
Solyc08g069100	1.15686	3.04021	0.0147103	0.586574	LOW QUALITY:Exocyst complex exo70-like protein	GO:0000145|GO:0006887	exocyst | exocytosis	22.6.3.1	Vesicle trafficking.target membrane tethering.Exocyst complex.component EXO70	XP_010325192.1	AT4G31540.1
Solyc02g082750	-4.7371	-2.19362	0.0147349	0.5869	Phosphoinositide phosphatase family protein	GO:0052866	phosphatidylinositol phosphate phosphatase activity	27.5.4.4.2	Multi-process regulation.phosphoinositide lipid regulatory system.inositol polyphosphate 5-phosphatase activities.SAC-domain phosphoinositide phosphatase activities.SAC-group-II inositol-polyphosphate 3-/4-phosphatase	XP_004232559.1
Solyc12g008800	-3.12683	1.409	0.0148216	0.589699	Myb-like transcription factor family protein, putative	GO:0003677	DNA binding	15.5.2.2	RNA biosynthesis.transcriptional regulation.MYB transcription factor superfamily.transcription factor (MYB-related)	XP_004251664.1
Solyc00g174340	3.2206	9.35151	0.0148847	0.589704	Pathogenesis-related protein 1	GO:0005576	extracellular region	35.1	not assigned.annotated	NP_001234314.1
Solyc04g005150	6.10025	-2.64156	0.0148675	0.589704	Uridine kinase	GO:0005524|GO:0008152|GO:0016301	ATP binding | metabolic process | kinase activity	35.1	not assigned.annotated	XP_004237070.1
Solyc10g012100	-5.0794	-3.50282	0.0148805	0.589704	LOW QUALITY:CoA ligase	GO:0003824|GO:0008152	catalytic activity | metabolic process	35.1	not assigned.annotated	XP_004246201.2	AT1G20560.1
Solyc10g085010	1.68019	7.97203	0.0148877	0.589704	PAR1 protein			35.2	not assigned.not annotated	XP_004249554.1
Solyc01g109140	6.69438	3.05954	0.0149794	0.590529	divinyl ether synthase	GO:0005506|GO:0016705|GO:0020037|GO:0055114	iron ion binding | oxidoreductase activity, acting on paired donors, with incorporation or reduction of molecular oxygen | heme binding | oxidation-reduction process	11.7.1.3	Phytohormone action.jasmonic acid.biosynthesis.allene oxidase synthase (AOS)	NP_001234527.1
Solyc04g082420	-1.01216	7.50611	0.0149868	0.590529	BTB/POZ domain-containing protein	GO:0005515	protein binding	35.1	not assigned.annotated	XP_010320455.1
Solyc07g007820	0.716701	5.67654	0.0149898	0.590529	ENTH/ANTH/VHS superfamily protein	GO:0005545|GO:0030136|GO:0030276|GO:0048268	1-phosphatidylinositol binding | clathrin-coated vesicle | clathrin binding | clathrin coat assembly	35.1	not assigned.annotated	XP_010323283.1
Solyc10g054790	-5.88618	-2.79875	0.0149251	0.590529	X-intrinsic protein 1.5	GO:0005215|GO:0006810|GO:0016020	transporter activity | transport | membrane	24.3.1.5	Solute transport.channels.MIP family.X-intrinsic protein (XIP)	XP_010327422.1
Solyc10g085410	0.689626	4.62501	0.0149911	0.590529	Cactus-binding carboxy-terminal, cactin protein	GO:0005515	protein binding	35.1	not assigned.annotated	XP_025888925.1
Solyc02g093860	3.97595	3.44025	0.0150132	0.59075	Amino acid transporter, putative			24.2.3.4.2	Solute transport.carrier-mediated transport.APC superfamily.AAAP family.amino acid transporter (LHT)	XP_004231799.1
Solyc02g089320	1.06084	3.70977	0.0150588	0.591894	alpha/beta-Hydrolases superfamily protein			35.2	not assigned.not annotated	XP_025885381.1
Solyc02g005517	-5.49049	-3.08632	0.015079	0.592039	PIF1-like helicase	GO:0000723|GO:0003678|GO:0006281	telomere maintenance | DNA helicase activity | DNA repair	35.2	not assigned.not annotated	XP_019069498.1
Solyc11g072060	-4.80956	-2.81173	0.0151069	0.592484	MYB-related transcription factor	GO:0003677	DNA binding	15.5.2.1	RNA biosynthesis.transcriptional regulation.MYB transcription factor superfamily.transcription factor (MYB)	XP_004251439.1
Solyc07g008810	3.53374	-0.477219	0.0151459	0.593363	LOW QUALITY:Monovalent Cation:Proton antiporter-2 family			35.2	not assigned.not annotated
Solyc04g050730	-4.67882	0.243737	0.0152471	0.595657	GDSL-motif esterase/acyltransferase/lipase	GO:0016788	hydrolase activity, acting on ester bonds	21.9.5.2	Cell wall organisation.cutin and suberin.cutin polyester biosynthesis.cutin synthase (CD)	NP_001305416.1
Solyc08g078210	-0.976428	3.63846	0.0152475	0.595657	Nudix hydrolase	GO:0016787	hydrolase activity	35.1	not assigned.annotated	XP_004245803.1
Solyc12g089230	-3.32491	-1.81954	0.0152545	0.595657	Peptide transporter	GO:0016021	integral component of membrane	24.2.2.9	Solute transport.carrier-mediated transport.MFS superfamily.anion transporter (NRT1/PTR)	XP_025884394.1
Solyc03g118860	-0.777224	4.47702	0.0153412	0.596491	UDP-N-acetylglucosamine--N-acetylmuramyl-(Pentapeptide) pyrophosphoryl-undecaprenol N-acetylglucosamine transferase, putative	GO:0016758	transferase activity, transferring hexosyl groups	35.2	not assigned.not annotated	XP_004235800.1
Solyc06g063260	2.01919	0.287233	0.0153425	0.596491	alpha-1,2-Mannosidase	GO:0004571|GO:0005509|GO:0016020	mannosyl-oligosaccharide 1,2-alpha-mannosidase activity | calcium ion binding | membrane	18.1.1.6.3	Protein modification.glycosylation.N-linked glycosylation.complex N-glycan maturation.class-I alpha-mannosidase I	XP_004242262.1
Solyc06g067890	1.01927	2.18131	0.0153397	0.596491	Alpha/beta hydrolase-like			35.2	not assigned.not annotated	XP_004241714.1
Solyc08g066860	-3.39265	-2.49126	0.0153324	0.596491	LOW QUALITY:Auxin canalization protein			35.1	not assigned.annotated	XP_004245183.1	AT4G32785.1
Solyc09g031930	0.657971	6.507	0.0153614	0.596576	KH domain-containing family protein	GO:0003723	RNA binding	35.1	not assigned.annotated	XP_004246970.1
Solyc02g080230	-4.52586	-2.57894	0.0154033	0.597555	ROP-interactive CRIB motif-containing protein 10			27.4.5.2	Multi-process regulation.Rop-GTPase regulatory system.ROP GTPase effector activities.GTPase effector (RIC)	XP_004232736.1
Solyc01g005520	-0.859494	4.449	0.0154269	0.597821	Tetratricopeptide repeat containing protein	GO:0005515	protein binding	1.1.1.3.16	Photosynthesis.photophosphorylation.photosystem II.assembly and maintenance.assembly factor (MET1)	XP_004228646.1
Solyc09g091635	-5.35439	-3.42309	0.0154768	0.599105	LOW QUALITY:F-box family protein	GO:0005515	protein binding	19.2.2.8.1.4.6	Protein homeostasis.ubiquitin-proteasome system.ubiquitin-fold protein conjugation.Cullin-based ubiquitylation complexes.SKP1-CUL1-FBX (SCF) E3 ligase complexes.F-BOX substrate adaptor components.component FBX	XP_004247950.1
Solyc03g006880	-3.38379	-2.19536	0.0155448	0.599993	gibberellin 20-oxidase-1	GO:0016491|GO:0055114	oxidoreductase activity | oxidation-reduction process	11.6.1.5	Phytohormone action.gibberellin.biosynthesis.gibberellin 20-oxidase	NP_001234070.1
Solyc10g055230	-5.44724	-2.87981	0.0155344	0.599993	Dirigent protein			35.1	not assigned.annotated	XP_004248662.1	AT1G55210.1
Solyc11g021170	2.43606	3.12956	0.01555	0.599993	S-adenosyl-L-methionine-dependent methyltransferases superfamily protein			35.1	not assigned.annotated	XP_019066678.2
Solyc00g012440	1.61738	2.48019	0.0155672	0.600009	Senescence-associated protein			35.2	not assigned.not annotated	XP_025884627.1
Solyc03g120630	-0.733968	5.94259	0.0155849	0.600044	ribosomal protein S17	GO:0003735|GO:0005622|GO:0005840|GO:0006412	structural constituent of ribosome | intracellular | ribosome | translation	17.7.2.2.17	Protein biosynthesis.organelle machinery.plastidial ribosome.small ribosomal subunit proteome.component psRPS17	XP_004235675.1
Solyc06g082210	0.933742	4.85401	0.0156193	0.600077	LIGHT-DEPENDENT SHORT HYPOCOTYLS-like protein (DUF640)			35.1	not assigned.annotated	XP_004242504.1	AT1G07090.1
Solyc08g076250	-2.61207	-1.99688	0.0156182	0.600077	Cytochrome P450	GO:0016705|GO:0055114	oxidoreductase activity, acting on paired donors, with incorporation or reduction of molecular oxygen | oxidation-reduction process	50.1.13	Enzyme classification.EC_1 oxidoreductases.EC_1.14 oxidoreductase acting on paired donor with incorporation or reduction of molecular oxygen	XP_004245943.1
Solyc07g054840	3.72108	-3.28807	0.0157502	0.604455	R2R3MYB transcription factor 41	GO:0003677	DNA binding	15.5.2.1	RNA biosynthesis.transcriptional regulation.MYB transcription factor superfamily.transcription factor (MYB)	XP_004248465.1
Solyc08g081520	-2.57732	1.80468	0.0157872	0.605227	LOW QUALITY:Plant/F1M20-13 protein			35.2	not assigned.not annotated	XP_004245568.1	AT1G63930.1
Solyc01g107060	5.53866	-3.32271	0.0158294	0.605545	LOW QUALITY:3beta-hydroxysteroid-dehydrogenase/decarboxylase isoform 2			50.2.3	Enzyme classification.EC_2 transferases.EC_2.3 acyltransferase	XP_004235881.1
Solyc12g007300	1.20383	3.20135	0.015827	0.605545	LOW QUALITY:B3 domain-containing protein, putative	GO:0003677	DNA binding	15.5.5.2	RNA biosynthesis.transcriptional regulation.B3 transcription factor superfamily.transcription factor (REM)	XP_004251622.1	AT4G03170.1
Solyc02g024050	-0.88705	4.38946	0.015922	0.60714	Ferredoxin--NADP reductase	GO:0016491|GO:0055114	oxidoreductase activity | oxidation-reduction process	50.1.17	Enzyme classification.EC_1 oxidoreductases.EC_1.18 oxidoreductase acting on iron-sulfur protein as donor	XP_004231567.1
Solyc06g031670	-6.0334	-2.92341	0.0159045	0.60714	P-loop containing nucleoside triphosphate hydrolases superfamily protein	GO:0005524|GO:0016301	ATP binding | kinase activity	35.2	not assigned.not annotated	XP_004240822.2
Solyc07g041740	4.29881	0.608585	0.0159052	0.60714	LOW QUALITY:Polynucleotidyl transferase, Ribonuclease H fold	GO:0003676	nucleic acid binding	35.2	not assigned.not annotated	XP_004242524.1
Solyc06g048470	-0.968405	4.70971	0.0159625	0.608039	COP1-interacting-like protein, putative			35.2	not assigned.not annotated	XP_010322107.1
Solyc05g010060	-4.87662	-1.96547	0.0159826	0.608154	Phosphate transporter PHO1-like protein			24.2.7.4 | 25.3.2.2	Solute transport.carrier-mediated transport.IT superfamily.phosphate transporter (PHO) | Nutrient uptake.phosphorus assimilation.phosphate uptake.phosphate transporter (PHO1)	XP_004238979.1
Solyc01g006730	-5.53726	-2.43504	0.0160728	0.610936	Calcium-dependent protein kinase	GO:0005524	ATP binding	18.4.5.4	Protein modification.phosphorylation.CAMK protein kinase superfamily.protein kinase (CDPK)	XP_004228632.1
Solyc03g077925	-2.18803	-1.57136	0.0161408	0.612871	40S ribosomal protein S9, putative	GO:0005622|GO:0019843	intracellular | rRNA binding	35.1	not assigned.annotated	XP_010319448.1
Solyc04g071920	-4.07825	-2.71944	0.0161654	0.613155	Protein kinase-like protein	GO:0005524	ATP binding	18.4.3.1.8	Protein modification.phosphorylation.CMGC protein kinase superfamily.CDK protein kinase families.protein kinase (CDK9)	XP_025886573.1
Solyc00g044350	-3.15666	-0.571401	0.0162257	0.613497	EPIDERMAL PATTERNING FACTOR-like protein			11.10.2.3.1	Phytohormone action.signalling peptides.CRP (cysteine-rich-peptide) category.EPF/EPFL-peptide activity.EPF/EPFL-precursor polypeptide	XP_004253369.2
Solyc01g060205	-1.3682	0.64954	0.0161932	0.613497	XH/XS domain-containing family protein			35.2	not assigned.not annotated	XP_004242072.2
Solyc07g066070	-0.65024	5.83219	0.0162259	0.613497	KH domain-containing protein	GO:0003723	RNA binding	35.1	not assigned.annotated	XP_004244007.1
Solyc01g100020	-1.31677	1.2886	0.0162568	0.614017	Phospholipase D	GO:0003824	catalytic activity	5.7.2.4.5	Lipid metabolism.lipid degradation.phospholipase activities.phospholipase D activities.phospholipase D (PLD-zeta)	XP_010313256.3
Solyc10g085720	-0.914803	5.55538	0.0162932	0.614743	Kinase family protein	GO:0005524	ATP binding	18.4.3.5	Protein modification.phosphorylation.CMGC protein kinase superfamily.protein kinase (SRPK)	XP_004249591.1
Solyc09g008220	-4.92387	-1.5845	0.0163213	0.615152	Unknown			35.2	not assigned.not annotated	XP_004238929.1
Solyc08g066260	-3.27896	6.22981	0.0163388	0.615164	Histidine decarboxylase	GO:0016831|GO:0019752|GO:0030170	carboxy-lyase activity | carboxylic acid metabolic process | pyridoxal phosphate binding	35.1	not assigned.annotated	XP_004245145.1
Solyc06g071840	-3.54001	-1.11271	0.0163966	0.615944	Pectate lyase			21.3.5.2	Cell wall organisation.pectin.modification and degradation.pectate lyase	NP_001351955.1
Solyc09g008860	-2.32751	-0.357808	0.0164082	0.615944	Ovary receptor kinase 14	GO:0004672|GO:0006468	protein kinase activity | protein phosphorylation	18.4.1.3	Protein modification.phosphorylation.TKL protein kinase superfamily.protein kinase (LRR-III)	XP_004246576.2
Solyc10g017950	3.64596	-2.65976	0.0164112	0.615944	Photosystem II reaction center protein Z	GO:0009523|GO:0009539|GO:0015979|GO:0042549	photosystem II | photosystem II reaction center | photosynthesis | photosystem II stabilization	1.1.1.2.15	Photosynthesis.photophosphorylation.photosystem II.PS-II complex.component PsbZ	YP_008563085.1
Solyc07g056140	-1.01511	6.76219	0.0164645	0.617297	ADP-glucose pyrophosphorylase small subunit	GO:0009058|GO:0016779	biosynthetic process | nucleotidyltransferase activity	3.2.2.3	Carbohydrate metabolism.starch metabolism.biosynthesis.ADP-glucose pyrophosphorylase	NP_001234696.2
Solyc07g054430	-1.43546	2.83509	0.0166185	0.622421	Glutamate formiminotransferase 1	GO:0005542|GO:0008152|GO:0016740	folic acid binding | metabolic process | transferase activity	35.2	not assigned.not annotated	XP_004243327.1
Solyc08g065265	-5.93376	-2.49569	0.0167673	0.626027	BED zinc finger,hAT family dimerization domain, putative	GO:0046983	protein dimerization activity	35.1	not assigned.annotated	XP_010319895.2
Solyc08g075210	0.797236	6.29015	0.0167597	0.626027	HXXXD-type acyl-transferase family protein	GO:0016747	transferase activity, transferring acyl groups other than amino-acyl groups	50.2.3	Enzyme classification.EC_2 transferases.EC_2.3 acyltransferase	XP_004246214.1
Solyc10g005340	-1.80271	2.37336	0.0167456	0.626027	ROP-interactive CRIB motif protein			27.4.5.2	Multi-process regulation.Rop-GTPase regulatory system.ROP GTPase effector activities.GTPase effector (RIC)	XP_004248396.1
Solyc03g120800	-6.65444	-2.44688	0.0168486	0.627265	Peroxidase	GO:0004601|GO:0006979|GO:0020037|GO:0055114	peroxidase activity | response to oxidative stress | heme binding | oxidation-reduction process	35.1	not assigned.annotated	XP_010318538.1
Solyc08g061180	-3.24352	-0.761416	0.0168414	0.627265	Pentatricopeptide repeat-containing protein, putative			35.2	not assigned.not annotated	XP_025888588.1	AT3G53700.1
Solyc10g018340	6.31116	0.497847	0.0168531	0.627265	Small auxin up-regulated RNA71	GO:0009733	response to auxin	35.1	not assigned.annotated	XP_004229795.1	AT2G45210.1
Solyc03g006920	0.931191	3.9398	0.0168978	0.628274	Kinase family protein	GO:0005524	ATP binding	18.4.1.41	Protein modification.phosphorylation.TKL protein kinase superfamily.receptor-like protein kinase (RLCK-XI)	XP_004234147.1	AT2G45590.1
Solyc01g090950	-0.832975	4.10728	0.0169526	0.628351	Transcription factor GRAS			15.5.12	RNA biosynthesis.transcriptional regulation.transcription factor (GRAS)	NP_001333839.1
Solyc10g051095	-0.782333	4.81682	0.0169468	0.628351	NAD(P)-binding Rossmann-fold superfamily protein			1.1.5.2.2.2 | 23.1.3.5.3	Photosynthesis.photophosphorylation.linear electron flow.ferredoxin-NADP reductase (FNR) activity.FNR membrane-tethering.FNR-interacting protein (TIC62) | Protein translocation.chloroplast.inner envelope TIC translocation system.redox regulon complex.component Tic62	XP_025883486.1
Solyc12g042730	2.01968	2.22518	0.016927	0.628351	LOW QUALITY:VQ motif-containing protein			26	External stimuli response	XP_004252484.1
Solyc05g046340	5.42152	0.245421	0.0170495	0.629335	Phosphomannomutase	GO:0004615|GO:0005737|GO:0009298	phosphomannomutase activity | cytoplasm | GDP-mannose biosynthetic process	10.3.1.2	Redox homeostasis.low-molecular-weight scavengers.ascorbate biosynthesis.phosphomannomutase (PMM)	XP_004240127.1
Solyc05g053610	4.26117	2.45624	0.0170184	0.629335	Pleiotropic drug resistance ABC transporter	GO:0016020	membrane	24.1.3.2.2	Solute transport.primary active transport.ABC superfamily.ABC2 family.subfamily ABCG transporter	XP_004239864.1	AT1G15520.1
Solyc06g061080	-2.35688	1.02309	0.0170227	0.629335	NAC domain protein,	GO:0003677|GO:0006355	DNA binding | regulation of transcription, DNA-templated	15.5.17	RNA biosynthesis.transcriptional regulation.transcription factor (NAC)	XP_004241972.1
Solyc12g013960	1.31354	2.79043	0.0170321	0.629335	arginine N-methyltransferase, putative (DUF688)			35.2	not assigned.not annotated	XP_004251869.1
Solyc07g065880	-1.64034	-1.07058	0.0170871	0.629929	Kinesin motor family protein	GO:0005515	protein binding	20.1.3.12	Cytoskeleton organisation.microtubular network.Kinesin microtubule-based motor protein activities.motor protein (Kinesin-14)	XP_010324236.1
Solyc10g083940	-1.97711	2.52202	0.0171008	0.629929	Nodulin-like / Major Facilitator Superfamily protein			24.2.2.16	Solute transport.carrier-mediated transport.MFS superfamily.anion transporter (Fabaceae-N70)	XP_004249478.1	AT2G39210.1
Solyc08g082190	1.15764	8.88232	0.0171282	0.63029	diacylglycerol kinase 5			35.2	not assigned.not annotated
Solyc02g068830	2.15319	0.845161	0.0171872	0.631811	Non-specific serine/threonine protein kinase	GO:0005524	ATP binding	18.4.1.12	Protein modification.phosphorylation.TKL protein kinase superfamily.protein kinase (LRR-XII)	XP_004233904.1
Solyc00g009760	1.41753	4.48675	0.0172519	0.632363	LOW QUALITY:Senescence-associated protein			35.2	not assigned.not annotated	XP_010325779.1
Solyc02g084540	-1.65958	0.658334	0.0172553	0.632363	Transmembrane and coiled-coil domain-containing protein 4			35.2	not assigned.not annotated	XP_010316399.2
Solyc03g007380	2.5963	2.5152	0.0172472	0.632363	WRKY transcription factor 52	GO:0003700|GO:0006355|GO:0043565	DNA-binding transcription factor activity | regulation of transcription, DNA-templated | sequence-specific DNA binding	15.5.22	RNA biosynthesis.transcriptional regulation.transcription factor (WRKY)	XP_004234275.1
Solyc07g042190	1.02768	7.5275	0.0172999	0.63335	DUF581 family protein			27.3.3	Multi-process regulation.SnRK1-kinase regulatory system.SnRK1-interacting factor (FLZ)	XP_004243694.1
Solyc09g055760	-0.626532	6.09588	0.0173703	0.63411	myosin heavy chain-like protein			35.2	not assigned.not annotated	XP_025888496.1
Solyc09g064500	-1.35596	3.52861	0.0173397	0.63411	Photosystem II reaction center Psb28 protein	GO:0009523|GO:0009654|GO:0015979|GO:0016020	photosystem II | photosystem II oxygen evolving complex | photosynthesis | membrane	1.1.1.3.9	Photosynthesis.photophosphorylation.photosystem II.assembly and maintenance.regulatory protein (Psb28)	XP_004247130.1
Solyc11g013500	1.3548	1.76184	0.0173738	0.63411	LOW QUALITY:Lysine-specific demethylase rbr-2			35.2	not assigned.not annotated	XP_010312805.1	AT1G36940.2
Solyc03g083910	-1.55663	10.3033	0.0174595	0.63529	symbol=TIV1	GO:0004564|GO:0004575	beta-fructofuranosidase activity | sucrose alpha-glucosidase activity	3.1.4.1.2	Carbohydrate metabolism.sucrose metabolism.degradation.invertase activities.acid beta-fructofuranosidase (VIN)	NP_001234843.2
Solyc06g052055	-1.68405	0.776177	0.0174251	0.63529	Heat shock protein 70			35.1	not assigned.annotated	XP_004234985.1
Solyc11g065990	-2.23118	-0.554944	0.0174467	0.63529	Actin			20.2.1	Cytoskeleton organisation.microfilament network.actin filament protein	NP_001332770.1
Solyc02g063542	1.13742	2.36922	0.0175144	0.636316	Squalene monooxygenase	GO:0016491|GO:0055114	oxidoreductase activity | oxidation-reduction process	9.1.5.2	Secondary metabolism.terpenoids.cycloartenol biosynthesis.squalene epoxidase	XP_025885029.1
Solyc06g076060	-4.01677	-2.37643	0.0175232	0.636316	LOW QUALITY:Cyclin-dependent protein kinase inhibitor SMR3			13.1.1.3.2	Cell cycle organisation.cell cycle control.cyclin-dependent regulation.cyclin-dependent protein kinase inhibitor activities.inhibitor (SIM)	XP_010325862.1
Solyc08g006720	-0.720179	6.72276	0.0176149	0.638726	Glutathione peroxidase	GO:0004602|GO:0006979|GO:0055114	glutathione peroxidase activity | response to oxidative stress | oxidation-reduction process	10.4.2	Redox homeostasis.hydrogen peroxide removal.glutathione peroxidase	XP_004244516.1
Solyc09g059675	1.28835	1.8709	0.0176253	0.638726	alpha/beta hydrolase family protein			35.2	not assigned.not annotated	XP_004247078.1
Solyc03g071720	-0.926881	3.04436	0.0176731	0.63981	Phytol kinase			10.3.2.7	Redox homeostasis.low-molecular-weight scavengers.tocopherol biosynthesis.phytol kinase (VTE5)	NP_001333743.1
Solyc02g080810	-0.693341	6.21002	0.0177211	0.640899	Aminomethyltransferase	GO:0005515	protein binding	1.3.4.2	Photosynthesis.photorespiration.glycine decarboxylase complex.aminomethyltransferase component T-protein	XP_010316580.1
Solyc03g079980	3.43924	-0.789793	0.0177659	0.641221	transmembrane protein, putative (Protein of unknown function, DUF599)			35.2	not assigned.not annotated	XP_004235043.1
Solyc08g081950	0.753865	9.49868	0.0177514	0.641221	Ubiquitin-conjugating enzyme E2			19.2.2.5.2	Protein homeostasis.ubiquitin-proteasome system.ubiquitin-fold protein conjugation.MUB conjugation.conjugation E2 protein	XP_004245543.1
Solyc04g015490	-0.798604	4.52809	0.0178387	0.643202	Mg-protoporphyrin IX chelatase	GO:0005524|GO:0015995|GO:0016851	ATP binding | chlorophyll biosynthetic process | magnesium chelatase activity	7.12.6.1.1	Coenzyme metabolism.tetrapyrrol biosynthesis.chlorophyll metabolism.magnesium-chelatase complex.component CHL-D	XP_004236627.1
Solyc01g021730	1.17376	3.62844	0.01804	0.648498	LOW QUALITY:NAC domain-containing protein, putative	GO:0003677|GO:0006355	DNA binding | regulation of transcription, DNA-templated	15.5.17	RNA biosynthesis.transcriptional regulation.transcription factor (NAC)	XP_004228763.1	AT3G44290.1
Solyc11g007390	5.08815	-0.158237	0.0180115	0.648498	Glycosyltransferase	GO:0008152|GO:0016758	metabolic process | transferase activity, transferring hexosyl groups	35.1	not assigned.annotated	XP_004249992.2	AT5G49690.1
Solyc11g011770	1.33899	1.97986	0.01804	0.648498	Myb family transcription factor-like protein	GO:0003677	DNA binding	15.5.2.3	RNA biosynthesis.transcriptional regulation.MYB transcription factor superfamily.transcription factor (GARP)	XP_004250231.1
Solyc01g111970	1.50477	5.67059	0.0180752	0.648666	L-ascorbate oxidase-like protein	GO:0055114	oxidation-reduction process	50.1.10	Enzyme classification.EC_1 oxidoreductases.EC_1.10 oxidoreductase acting on diphenol or related substance as donor	XP_004231076.1
Solyc04g039810	-3.40715	-2.21304	0.0180872	0.648666	Photosystem I assembly protein Ycf4	GO:0009522|GO:0009579|GO:0015979|GO:0016021	photosystem I | thylakoid | photosynthesis | integral component of membrane	35.1	not assigned.annotated	YP_008563099.1	ATCG00520.1
Solyc05g052900	-5.90519	-2.91591	0.0180991	0.648666	Ras-related protein, expressed	GO:0005525|GO:0007264	GTP binding | small GTPase mediated signal transduction	22.8.1.1	Vesicle trafficking.regulation of membrane tethering and fusion.RAB-GTPase activities.A-class RAB GTPase	XP_019069388.1
Solyc01g066260	-5.38086	-2.10349	0.0182219	0.649471	LOW QUALITY:dyggve-melchior-clausen syndrome protein			35.2	not assigned.not annotated	XP_004230202.1
Solyc01g080000	-2.56467	-1.25636	0.0182668	0.649471	Eukaryotic aspartyl protease family protein	GO:0004190|GO:0006508	aspartic-type endopeptidase activity | proteolysis	19.4.3.1	Protein homeostasis.proteolysis.aspartic-type peptidase activities.A1-class protease (Pepsin)	XP_004229564.1	AT1G03220.1
Solyc01g106510	4.65464	-0.522609	0.0181831	0.649471	LOW QUALITY:F-box protein			35.2	not assigned.not annotated	XP_004230661.1	AT3G25750.1
Solyc03g116230	1.25846	8.93881	0.0182037	0.649471	42kDa chitin-binding protein	GO:0008061	chitin binding	35.1	not assigned.annotated	XP_019068637.1
Solyc04g080910	-6.19715	-3.08228	0.0182589	0.649471	Dehydration responsive element binding transcription factor	GO:0003700|GO:0006355	DNA-binding transcription factor activity | regulation of transcription, DNA-templated	15.5.7.2	RNA biosynthesis.transcriptional regulation.AP2/ERF transcription factor superfamily.transcription factor (DREB)	XP_004238613.1	AT1G75490.1
Solyc05g047510	-6.11345	-3.15332	0.0182545	0.649471	Sulfotransferase	GO:0008146	sulfotransferase activity	11.3.3.1	Phytohormone action.brassinosteroid.conjugation and degradation.steroid sulphotransferase	XP_004240284.1
Solyc07g017773	5.29606	-2.39461	0.0181517	0.649471	Fibronectin type III domain-containing protein			35.2	not assigned.not annotated	XP_004239647.1
Solyc09g015140	-2.36455	0.936174	0.01816	0.649471	Replication protein A 70 kDa DNA-binding subunit B			35.2	not assigned.not annotated	XP_025886291.1
Solyc09g055930	-0.775477	4.56626	0.0183247	0.650882	Monocopper oxidase-like protein SKU5	GO:0055114	oxidation-reduction process	50.1.10	Enzyme classification.EC_1 oxidoreductases.EC_1.10 oxidoreductase acting on diphenol or related substance as donor	XP_004247026.1
Solyc01g060200	5.39535	-3.09027	0.0184366	0.651986	3'-5' exonuclease domain-containing protein	GO:0003676|GO:0006139|GO:0008408	nucleic acid binding | nucleobase-containing compound metabolic process | 3'-5' exonuclease activity	35.2	not assigned.not annotated	XP_010318517.1
Solyc03g097560	-1.97838	3.89661	0.0184548	0.651986	Bidirectional sugar transporter SWEET	GO:0016021	integral component of membrane	24.2.6.1	Solute transport.carrier-mediated transport.TOC superfamily.sugar efflux transporter (SWEET)	XP_004235340.1
Solyc04g078520	-1.41859	4.10177	0.0184652	0.651986	Serine/threonine-protein kinase WNK			35.1	not assigned.annotated	XP_010320317.1
Solyc06g068900	1.36325	6.94262	0.0184122	0.651986	Nudix hydrolase	GO:0016787	hydrolase activity	35.1	not assigned.annotated	XP_004241659.1
Solyc10g076900	-3.91939	-1.86091	0.0183907	0.651986	Calcium-dependent protein kinase	GO:0005524	ATP binding	18.4.5.4	Protein modification.phosphorylation.CAMK protein kinase superfamily.protein kinase (CDPK)	XP_004249089.1
Solyc10g084250	-0.863374	3.71202	0.0184551	0.651986	clade VIII lectin receptor kinase	GO:0030246	carbohydrate binding	18.4.1.19	Protein modification.phosphorylation.TKL protein kinase superfamily.protein kinase (L-lectin)	NP_001307224.1	AT3G53380.1
Solyc02g070990	-2.92982	-0.401109	0.0185165	0.653155	Chlorophyll a-b binding protein, chloroplastic	GO:0009765|GO:0016020	photosynthesis, light harvesting | membrane	1.1.1.1.1	Photosynthesis.photophosphorylation.photosystem II.LHC-II complex.component LHCb1/2/3	NP_001333218.1	AT2G34430.1
Solyc02g032210	-3.3165	-1.80323	0.0185544	0.653848	LOW QUALITY:B3 domain protein (DUF313)			35.2	not assigned.not annotated	XP_004231678.2	AT2G24670.1
Solyc02g080160	-2.06678	2.53444	0.0185825	0.65419	Xyloglucan endotransglucosylase/hydrolase	GO:0010411|GO:0016762|GO:0042546	xyloglucan metabolic process | xyloglucan:xyloglucosyl transferase activity | cell wall biogenesis	50.2.4 | 21.2.1.2.6	Enzyme classification.EC_2 transferases.EC_2.4 glycosyltransferase | Cell wall organisation.hemicellulose.xyloglucan.modification and degradation.xyloglucan endotransglucosylase/hydrolase	XP_019067894.1
Solyc01g010000	0.777646	3.62062	0.0186372	0.655473	ACT domain containing protein, putative, expressed	GO:0008152|GO:0016597	metabolic process | amino acid binding	35.1	not assigned.annotated	XP_004228427.1
Solyc09g018790	-0.634558	6.84693	0.0187037	0.657165	Succinic semialdehyde reductase isofom1	GO:0055114	oxidation-reduction process	4.2.2.3.1	Amino acid metabolism.degradation.gamma-aminobutyrate (GABA).gamma-hydroxybutyrate formation.bifunctional gamma-hydroxybutyrate dehydrogenase and glyoxylate reductase	NP_001233832.2
Solyc03g117440	-1.03455	3.34635	0.0187469	0.657847	RNA helicase DEAD14	GO:0003676|GO:0008270	nucleic acid binding | zinc ion binding	35.1	not assigned.annotated	XP_004235903.1
Solyc05g006870	1.12498	5.08637	0.0187599	0.657847	Thioredoxin H	GO:0045454	cell redox homeostasis	10.6.1	Redox homeostasis.cytosol/mitochondrion/nucleus redox homeostasis.H-type thioredoxin	XP_004238755.1
Solyc00g009140	-1.06502	3.36058	0.0187793	0.657884	NAD(P)-binding Rossmann-fold superfamily protein			35.2	not assigned.not annotated	XP_025884618.1
Solyc11g044455	5.8723	-3.16907	0.0188275	0.658927	Serine/threonine protein phosphatase 7 long form isogeny			35.1	not assigned.annotated	XP_025887697.1
Solyc02g031920	1.36623	2.70326	0.0189091	0.659201	Pathogen-related protein			26.8	External stimuli response.pathogen	XP_004231587.1
Solyc05g005865	-2.40855	0.363712	0.018878	0.659201	Major latex-like protein	GO:0006952|GO:0009607	defense response | response to biotic stimulus	35.1	not assigned.annotated	XP_010320602.1
Solyc05g014560	-2.50409	0.442125	0.0188733	0.659201	NAD(P)-binding Rossmann-fold superfamily protein	GO:0016491	oxidoreductase activity	5.1.4.4	Lipid metabolism.fatty acid biosynthesis.plastidial fatty acid synthase (ptFAS) system.ketoacyl-ACP reductase (KAR1)	XP_004239186.1
Solyc12g014485	3.02087	-1.83354	0.018907	0.659201	Cell wall-associated hydrolase			35.1	not assigned.annotated	XP_010316327.1
Solyc02g067050	-6.06543	-1.90427	0.0189571	0.6595	UPF0301 protein			35.2	not assigned.not annotated	XP_004233379.1
Solyc04g005610	1.61744	3.21737	0.0189399	0.6595	NAC domain protein NAC2	GO:0003677|GO:0006355	DNA binding | regulation of transcription, DNA-templated	15.5.17	RNA biosynthesis.transcriptional regulation.transcription factor (NAC)	XP_004237044.1
Solyc09g056260	-0.723406	4.45774	0.018973	0.6595	tRNA pseudouridine synthase	GO:0001522|GO:0003723|GO:0009451|GO:0009982	pseudouridine synthesis | RNA binding | RNA modification | pseudouridine synthase activity	16.6.3.1	RNA processing.tRNA modification.pseudouridylation.tRNA pseudouridine synthase (TruA)	XP_004247032.1
Solyc10g084040	-0.910912	4.85283	0.018993	0.659554	Thylakoid lumenal 15.0 kDa protein 2, chloroplastic			35.1	not assigned.annotated	XP_004249484.1
Solyc04g074990	-2.47019	-0.260729	0.0190301	0.659563	ZF-HD homeobox protein family	GO:0003677	DNA binding	15.5.3.13	RNA biosynthesis.transcriptional regulation.Homeobox transcription factor superfamily.transcription factor (zf-HD)	XP_004237971.1
Solyc06g048930	0.88255	3.74825	0.0190226	0.659563	Tomato Response regulator 16,17	GO:0000160	phosphorelay signal transduction system	11.4.2.5	Phytohormone action.cytokinin.perception and signal transduction.A-type ARR response negative regulator	XP_010322123.2
Solyc06g053840	-1.30901	6.54731	0.0190769	0.659943	auxin-regulated IAA4	GO:0005634|GO:0006355	nucleus | regulation of transcription, DNA-templated	35.1	not assigned.annotated	NP_001266256.1
Solyc07g045080	-1.54849	2.29942	0.019078	0.659943	NADP-dependent alkenal double bond reductase P1	GO:0055114	oxidation-reduction process	50.1.3	Enzyme classification.EC_1 oxidoreductases.EC_1.3 oxidoreductase acting on CH-CH group of donor	NP_001309000.1
Solyc02g084020	0.675476	5.078	0.0191146	0.660572	Small nuclear ribonucleoprotein	GO:0006396	RNA processing	16.4.2.4	RNA processing.pre-mRNA splicing.U1/U2/U4/U5-associated Sm accessory ribonucleoprotein complex.component Sm-D3	XP_004232479.1
Solyc07g008250	0.91584	7.08066	0.0191528	0.660614	EIN3-binding F-box-like protein	GO:0005515	protein binding	11.5.2.6 | 19.2.2.8.1.4.2	Phytohormone action.ethylene.perception and signal transduction.signal transducer (EBF) | Protein homeostasis.ubiquitin-proteasome system.ubiquitin-fold protein conjugation.Cullin-based ubiquitylation complexes.SKP1-CUL1-FBX (SCF) E3 ligase complexes.F-BOX substrate adaptor components.component EBF	XP_004242782.1
Solyc12g056860	1.2	2.88322	0.019147	0.660614	bZIP transcription factor family protein	GO:0006351|GO:0043565	transcription, DNA-templated | sequence-specific DNA binding	15.5.4.1 | 15.5.4.7.1	RNA biosynthesis.transcriptional regulation.bZIP transcription factor superfamily.transcription factor (bZIP) | RNA biosynthesis.transcriptional regulation.bZIP transcription factor superfamily.TGA transcription factor activity.transcription factor (TGA)	XP_004252551.1
Solyc01g086720	-1.97377	-0.766574	0.019286	0.661164	C2 domain-containing family protein	GO:0005515	protein binding	35.1	not assigned.annotated	XP_010324263.1
Solyc03g117310	1.99514	2.67573	0.0192217	0.661164	LOW QUALITY:Sterile alpha motif (SAM) domain-containing protein			35.2	not assigned.not annotated	XP_004235912.1	AT1G80520.1
Solyc04g073940	-2.85848	-2.70459	0.0193373	0.661164	TPR repeat-containing thioredoxin TTL1-like protein	GO:0005515	protein binding	35.1	not assigned.annotated	XP_004238521.1
Solyc04g076220	1.32305	4.31443	0.0193708	0.661164	AT hook motif DNA-binding family protein			35.1	not assigned.annotated	XP_004237987.1
Solyc05g009660	-2.43765	-1.29824	0.0193019	0.661164	Transcription factor PERIANTHIA-like protein	GO:0006351|GO:0043565	transcription, DNA-templated | sequence-specific DNA binding	15.5.4.1 | 15.5.4.7.1 | 26.8.3.1.2	RNA biosynthesis.transcriptional regulation.bZIP transcription factor superfamily.transcription factor (bZIP) | RNA biosynthesis.transcriptional regulation.bZIP transcription factor superfamily.TGA transcription factor activity.transcription factor (TGA) | External stimuli response.pathogen.defense mechanisms.systemic acquired resistance (SAR).NPR1-interactive transcription factor (TGA)	XP_004239421.1
Solyc06g006020	2.72129	-0.368033	0.0193371	0.661164	Non-specific serine/threonine protein kinase	GO:0005524	ATP binding	18.4.1.12	Protein modification.phosphorylation.TKL protein kinase superfamily.protein kinase (LRR-XII)	XP_025887149.1
Solyc06g007370	-2.47755	-1.81455	0.0192522	0.661164	LOW QUALITY:6,7-dimethyl-8-ribityllumazine synthase			35.2	not assigned.not annotated	XP_004240422.1	AT2G30230.1
Solyc07g007060	-0.703692	6.00421	0.0193721	0.661164	Metal tolerance protein	GO:0006812|GO:0008324|GO:0016021|GO:0055085	cation transport | cation transmembrane transporter activity | integral component of membrane | transmembrane transport	24.2.9.2.3	Solute transport.carrier-mediated transport.CDF superfamily.CDF family.zinc cation transporter (Zn-CDF)	XP_025887645.1
Solyc08g076840	-0.749512	4.93835	0.0192269	0.661164	RNA-binding (RRM/RBD/RNP motifs) family protein	GO:0003676	nucleic acid binding	35.1	not assigned.annotated	XP_004245902.1
Solyc09g082110	0.937631	2.42781	0.0192885	0.661164	Seed maturation protein/ Late embryogenesis abundant protein			35.1	not assigned.annotated	XP_004247564.2
Solyc10g018300	-1.18401	6.03964	0.0192384	0.661164	Transketolase	GO:0004802	transketolase activity	1.2.7 | 3.9.2.3	Photosynthesis.calvin cycle.transketolase | Carbohydrate metabolism.oxidative pentose phosphate pathway.non-oxidative phase.transketolase	XP_004248560.1
Solyc03g005020	1.35729	9.01501	0.0194376	0.662767	Lipase	GO:0016788	hydrolase activity, acting on ester bonds	5.7.1.2.2	Lipid metabolism.lipid degradation.triacylglycerol lipase activities.diacyl-/triacylglycerol lipase activities.lipase (LIP)	XP_004234001.1
Solyc04g008470	-5.50832	-0.173048	0.0195345	0.664805	Defensin	GO:0006952	defense response	26.8.3.2.2	External stimuli response.pathogen.defense mechanisms.defensin activities.defensin (PDF2)	XP_010319372.1
Solyc12g036800	2.74583	-1.18206	0.0195192	0.664805	Receptor like protein			35.1	not assigned.annotated	XP_025884299.1	AT2G33030.1
Solyc05g006900	0.906102	4.70338	0.0195997	0.666388	glycine-rich protein			35.2	not assigned.not annotated	XP_004238757.1
Solyc10g076610	7.28482	-1.96906	0.0196711	0.668183	lysyl-tRNA synthetase	GO:0004824|GO:0005524|GO:0006430	lysine-tRNA ligase activity | ATP binding | lysyl-tRNA aminoacylation	17.2.13	Protein biosynthesis.aminoacyl-tRNA synthetase activities.lysine-tRNA ligase	NP_001234285.1
Solyc06g024245	1.53723	3.2379	0.019693	0.668292	Class II aaRS and biotin synthetases superfamily protein			35.2	not assigned.not annotated	XP_004243727.1
Solyc03g026000	-1.48328	2.29578	0.019717	0.668472	cold regulated protein 27			35.2	not assigned.not annotated	XP_004234373.1
Solyc04g040180	1.23398	7.87727	0.0197608	0.66869	S-adenosylmethionine-dependent methyltransferase, putative	GO:0008152|GO:0008168	metabolic process | methyltransferase activity	35.2	not assigned.not annotated	XP_004237334.1
Solyc11g069930	3.24859	-2.36551	0.01975	0.66869	Disease resistance protein			35.2	not assigned.not annotated	XP_025883853.1
Solyc09g005560	1.71277	2.02203	0.0198093	0.669697	Trihelix transcription factor GT-3b	GO:0003700|GO:0005634|GO:0006355|GO:0043565	DNA-binding transcription factor activity | nucleus | regulation of transcription, DNA-templated | sequence-specific DNA binding	15.5.20	RNA biosynthesis.transcriptional regulation.transcription factor (Trihelix)	XP_004246753.1
Solyc11g027760	1.38336	3.87088	0.0198497	0.670427	LOW QUALITY:Cytochrome P450 like_TBP			35.2	not assigned.not annotated
Solyc02g092530	-1.40434	2.35078	0.0198941	0.670662	Acetamidase/Formamidase family protein	GO:0016811	hydrolase activity, acting on carbon-nitrogen (but not peptide) bonds, in linear amides	35.2	not assigned.not annotated	XP_004231912.1
Solyc10g051120	1.90269	3.51846	0.0198861	0.670662	Mitochondrial pyruvate carrier	GO:0005743|GO:0006850	mitochondrial inner membrane | mitochondrial pyruvate transmembrane transport	5.1.1.5	Lipid metabolism.fatty acid biosynthesis.citrate shuttle.mitochondrial pyruvate transporter	XP_025888894.1
Solyc11g051090	-5.29644	-3.43105	0.0199186	0.670856	Sulfotransferase	GO:0008146	sulfotransferase activity	11.3.3.1	Phytohormone action.brassinosteroid.conjugation and degradation.steroid sulphotransferase	XP_004250849.1	AT2G03760.1
Solyc02g078160	-0.832799	7.44859	0.0199388	0.670905	DUF506 family protein			35.2	not assigned.not annotated	XP_004232882.1
Solyc08g067840	-0.83407	4.08186	0.0199796	0.671644	Photosystem II reaction center PsbP family protein	GO:0005509|GO:0009523|GO:0009654|GO:0015979|GO:0019898	calcium ion binding | photosystem II | photosystem II oxygen evolving complex | photosynthesis | extrinsic component of membrane	35.1	not assigned.annotated	XP_004245232.1
Solyc06g069120	0.875352	8.98289	0.020005	0.671866	translocase subunit seca			35.2	not assigned.not annotated	XP_004241628.1
Solyc09g018160	-0.741497	4.31463	0.0200642	0.673224	Nucleotidyltransferase domain containing protein, expressed			35.2	not assigned.not annotated	XP_004246272.1
Solyc02g092880	0.700139	6.49819	0.0201318	0.673962	maternal effect embryo arrest 59			35.2	not assigned.not annotated	NP_001294929.1
Solyc09g092520	1.9578	6.79704	0.0201224	0.673962	xyloglucan endotransglycosylase	GO:0010411|GO:0016762|GO:0042546	xyloglucan metabolic process | xyloglucan:xyloglucosyl transferase activity | cell wall biogenesis	50.2.4	Enzyme classification.EC_2 transferases.EC_2.4 glycosyltransferase	NP_001296797.1
Solyc12g089050	-2.18973	-1.52171	0.0201427	0.673962	LOW QUALITY:MBOAT (Membrane bound O-acyl transferase) family protein, putative			5.5.2.3.2	Lipid metabolism.phytosterol biosynthesis.phytosterol conjugation.phytosterol esterification.acyl-CoA:cholesterol acyltransferase	XP_010314632.1
Solyc01g098440	3.81337	-1.18526	0.0202336	0.674456	Kinase family protein	GO:0005524	ATP binding	50.2.7	Enzyme classification.EC_2 transferases.EC_2.7 transferase transferring phosphorus-containing group	XP_010312381.1
Solyc01g100490	2.01157	-0.306839	0.0202518	0.674456	chloronerva	GO:0030410|GO:0030418	nicotianamine synthase activity | nicotianamine biosynthetic process	25.4.3.1.1	Nutrient uptake.iron uptake.chelation-based strategy uptake.phytosiderophore biosynthesis.nicotianamine synthase	NP_001296307.1
Solyc02g063546	1.10853	2.38721	0.02025	0.674456	Squalene monooxygenase	GO:0016491|GO:0055114	oxidoreductase activity | oxidation-reduction process	9.1.5.2	Secondary metabolism.terpenoids.cycloartenol biosynthesis.squalene epoxidase	XP_025885029.1
Solyc04g007140	3.12711	1.60077	0.02021	0.674456	LOW QUALITY:zinc knuckle (CCHC-type) family protein	GO:0010112	regulation of systemic acquired resistance	35.2	not assigned.not annotated	XP_004235831.1
Solyc08g075990	-1.24325	2.19632	0.020233	0.674456	LOW PSII ACCUMULATION protein (DUF1995)			35.2	not assigned.not annotated	XP_004245955.1
Solyc11g006590	-1.74051	1.10818	0.0202866	0.674985	Cytochrome P450, putative	GO:0016705|GO:0055114	oxidoreductase activity, acting on paired donors, with incorporation or reduction of molecular oxygen | oxidation-reduction process	50.1.13	Enzyme classification.EC_1 oxidoreductases.EC_1.14 oxidoreductase acting on paired donor with incorporation or reduction of molecular oxygen	XP_004249946.1
Solyc08g065160	0.655424	6.36587	0.0203126	0.675225	Mediator of RNA polymerase II transcription subunit	GO:0001104|GO:0006357|GO:0016592	regulation of transcription by RNA polymerase II | mediator complex	15.3.3.2.4	RNA biosynthesis.RNA polymerase II-dependent transcription.MEDIATOR transcription co-activator complex.middle module.component MED10	XP_004245099.1
Solyc01g011350	-0.672258	6.56598	0.0203999	0.676165	ZZ-type zinc finger-containing protein 3, putative isoform 1			50.3.1	Enzyme classification.EC_3 hydrolases.EC_3.1 hydrolase acting on ester bond	NP_001307340.1
Solyc05g013180	-1.9862	1.50166	0.0203814	0.676165	Phosphate transporter PHO1-like protein	GO:0016021	integral component of membrane	24.2.7.4 | 25.3.2.2	Solute transport.carrier-mediated transport.IT superfamily.phosphate transporter (PHO) | Nutrient uptake.phosphorus assimilation.phosphate uptake.phosphate transporter (PHO1)	XP_025886871.1
Solyc07g007260	-1.55233	2.9351	0.020389	0.676165	Metallocarboxypeptidase inhibitor-like protein	GO:0004866	endopeptidase inhibitor activity	35.2	not assigned.not annotated	XP_004242716.1
Solyc07g017960	0.708713	5.21656	0.0204165	0.676165	Cofactor-independent phosphoglycerate mutase			16.4.1.5.1	RNA processing.pre-mRNA splicing.U2-type-intron-specific major spliceosome.U4/U6 U5 small nuclear ribonucleoprotein particle (snRNP).protein factor (snRNP27)	XP_010322629.1
Solyc09g062970	-5.188	-1.91756	0.0204547	0.676802	GDSL-like Lipase/Acylhydrolase superfamily protein			35.2	not assigned.not annotated	XP_019071310.1
Solyc08g067990	-2.91414	-2.61604	0.0205906	0.680671	Subtilisin-like protease	GO:0004252|GO:0006508	serine-type endopeptidase activity | proteolysis	19.4.2.1.1	Protein homeostasis.proteolysis.serine-type peptidase activities.S8-class protease (subtilisin) families.protease (SBT1)	XP_004245414.2
Solyc02g031790	4.19665	-0.198362	0.0206464	0.681096	Receptor-like protein kinase	GO:0005524	ATP binding	18.4.1.12	Protein modification.phosphorylation.TKL protein kinase superfamily.protein kinase (LRR-XII)	XP_004231674.1
Solyc02g065020	-5.29277	-1.80034	0.0206299	0.681096	BEST plant protein match is: (TAIR:plant.1) protein, putative			35.2	not assigned.not annotated	XP_010317165.1
Solyc03g121810	-4.07082	-2.68322	0.0206792	0.681096	Phospholipid-transporting ATPase	GO:0016021	integral component of membrane	5.8.2.1.1.1 | 24.1.2.4.1.1	Lipid metabolism.lipid trafficking.endoplasmic reticulum-plastid lipid transfer.phospholipid transverse translocation.ALA-ALIS flippase complex.active component ALA | Solute transport.primary active transport.P-type ATPase superfamily.P4 family.phospholipid flippase complex.P4-type ATPase component ALA	XP_019068735.1	AT1G17500.1
Solyc10g019210	-5.15444	-3.47891	0.0206797	0.681096	Sulfotransferase	GO:0008146	sulfotransferase activity	50.2.8	Enzyme classification.EC_2 transferases.EC_2.8 transferase transferring sulfur-containing group	XP_004250849.1	AT5G07010.1
Solyc10g005080	-1.21847	4.20295	0.0207281	0.682063	Late elongated hypocotyl	GO:0003677	DNA binding	15.5.2.2 | 27.1.1	RNA biosynthesis.transcriptional regulation.MYB transcription factor superfamily.transcription factor (MYB-related) | Multi-process regulation.circadian clock system.core oscillator protein (LHY|CCA1)	XP_025883775.1
Solyc01g111020	-0.697476	5.81617	0.0208408	0.682632	Pentatricopeptide repeat-containing protein, putative	GO:0005515	protein binding	24.3.1.5	Solute transport.channels.MIP family.X-intrinsic protein (XIP)	XP_004231448.1
Solyc04g071790	-1.80487	0.134604	0.0208351	0.682632	Cytochrome P450	GO:0016705|GO:0055114	oxidoreductase activity, acting on paired donors, with incorporation or reduction of molecular oxygen | oxidation-reduction process	50.1.13	Enzyme classification.EC_1 oxidoreductases.EC_1.14 oxidoreductase acting on paired donor with incorporation or reduction of molecular oxygen	XP_004238495.1
Solyc05g050770	-2.06608	1.95453	0.020809	0.682632	Serine carboxypeptidase, putative	GO:0004185|GO:0006508	serine-type carboxypeptidase activity | proteolysis	19.4.2.2	Protein homeostasis.proteolysis.serine-type peptidase activities.S10-class serine carboxypeptidase (SCPL)	XP_010321497.1
Solyc08g080980	-1.17833	1.53537	0.0208234	0.682632	Weak chloroplast movement under blue light 1-like protein			35.2	not assigned.not annotated	XP_025888225.1
Solyc12g100160	-0.835325	5.10438	0.0207823	0.682632	Ribosomal protein L6 family	GO:0003735|GO:0005840|GO:0006412|GO:0019843	structural constituent of ribosome | ribosome | translation | rRNA binding	17.7.2.1.6	Protein biosynthesis.organelle machinery.plastidial ribosome.large ribosomal subunit proteome.component psRPL6	XP_004252860.1
Solyc04g076340	-0.959551	4.57797	0.0209554	0.685757	Ribosomal RNA small subunit methyltransferase A			35.2	not assigned.not annotated	XP_019069188.1
Solyc08g076220	-1.54234	6.0971	0.0209936	0.686114	Phosphoribulokinase	GO:0005524|GO:0008152|GO:0016301	ATP binding | metabolic process | kinase activity	1.2.11	Photosynthesis.calvin cycle.phosphoribulokinase	XP_004245935.1
Solyc09g059670	1.36725	1.25499	0.0210047	0.686114	Leucine-rich repeat protein kinase family protein			35.2	not assigned.not annotated	XP_004238724.1
Solyc03g063370	-1.52067	0.0335274	0.021033	0.686413	Pentatricopeptide repeat-containing protein			35.2	not assigned.not annotated	XP_004233668.1
Solyc04g050574	-1.68147	-0.814071	0.0210678	0.686915	Cytochrome P450 family protein	GO:0005506|GO:0016705|GO:0020037|GO:0055114	iron ion binding | oxidoreductase activity, acting on paired donors, with incorporation or reduction of molecular oxygen | heme binding | oxidation-reduction process	50.1.13	Enzyme classification.EC_1 oxidoreductases.EC_1.14 oxidoreductase acting on paired donor with incorporation or reduction of molecular oxygen	XP_004237505.1
Solyc09g090570	-1.12219	4.11125	0.0210868	0.686915	proton gradient regulation 5			1.1.6.1.1	Photosynthesis.photophosphorylation.cyclic electron flow.PGR5/PGRL1 complex.component PGR5-like	XP_004247764.1	AT2G05620.1
Solyc04g064870	2.50008	5.8461	0.0211745	0.687268	protein early flowering 2-like			35.1	not assigned.annotated	NP_001311013.1
Solyc05g013760	-2.81887	-2.32013	0.0211522	0.687268	LOW QUALITY:Late embryogenesis abundant (LEA) hydroxyproline-rich glycoprotein family			35.2	not assigned.not annotated	XP_010320946.1
Solyc08g083210	-3.9328	0.643744	0.0211669	0.687268	endo-1,4-beta-glucanase (cel5)	GO:0004553|GO:0005975	hydrolase activity, hydrolyzing O-glycosyl compounds | carbohydrate metabolic process	35.1	not assigned.annotated	NP_001234090.2
Solyc11g022590	1.98824	1.42759	0.0211237	0.687268	trypsin inhibitor-like protein precursor	GO:0004866	endopeptidase inhibitor activity	35.1	not assigned.annotated	NP_001233769.1	AT1G73260.1
Solyc08g067550	3.46903	-3.31226	0.0212685	0.688636	Non-specific lipid-transfer protein	GO:0006869|GO:0008289	lipid transport | lipid binding	35.1	not assigned.annotated	XP_004245223.1	AT3G08770.2
Solyc08g079930	3.43799	-1.47901	0.0212744	0.688636	subtilisin-like protease	GO:0004252|GO:0006508	serine-type endopeptidase activity | proteolysis	35.1	not assigned.annotated	XP_019070611.1
Solyc09g057580	-0.914008	4.4842	0.0212572	0.688636	UV-B-induced protein, chloroplastic			35.1	not assigned.annotated	XP_004247039.1
Solyc04g082930	-0.914466	3.40452	0.0213381	0.690073	Chlorophyll a-b binding protein, chloroplastic	GO:0009765|GO:0016020	photosynthesis, light harvesting | membrane	1.1.1.1.5	Photosynthesis.photophosphorylation.photosystem II.LHC-II complex.component LHCq	XP_004238472.1
Solyc09g009820	-0.726563	3.9473	0.0213791	0.690775	Glutathione S-transferase domain-containing protein	GO:0009055|GO:0045454	electron transfer activity | cell redox homeostasis	35.2	not assigned.not annotated	XP_010325904.1
Solyc10g009160	0.885263	3.34304	0.0214209	0.691501	Bromodomain 4, putative	GO:0005515	protein binding	15.5.2.2	RNA biosynthesis.transcriptional regulation.MYB transcription factor superfamily.transcription factor (MYB-related)	XP_004248103.1
Solyc01g010150	1.22357	3.21887	0.0215328	0.693925	ACT domain-containing protein	GO:0008152|GO:0016597	metabolic process | amino acid binding	35.1	not assigned.annotated	XP_004228421.1
Solyc02g078100	7.23926	-2.60765	0.0215828	0.693925	Pollen Ole e 1 allergen/extensin	GO:0005199	structural constituent of cell wall	35.1	not assigned.annotated	XP_004232888.1
Solyc05g053340	-5.97016	-3.14774	0.0215906	0.693925	gibberellin 2-oxidase 1	GO:0016491|GO:0055114	oxidoreductase activity | oxidation-reduction process	11.6.3.4	Phytohormone action.gibberellin.modification and degradation.gibberellin 2-oxidase	NP_001234865.1
Solyc06g005390	1.24137	1.62626	0.021593	0.693925	Histone H2B	GO:0046982	protein heterodimerization activity	12.1.3	Chromatin organisation.histones.histone (H2B)	XP_004240357.1	AT2G28720.1
Solyc09g097870	0.892211	5.80391	0.0215432	0.693925	bHLH transcription factor 062	GO:0046983	protein dimerization activity	15.5.32 | 26.1.2.1.2	RNA biosynthesis.transcriptional regulation.transcription factor (bHLH) | External stimuli response.light.UV-A/blue light.cryptochrome-mediated photoperception.transcriptional regulator (CIB)	XP_004248023.1
Solyc04g079070	1.5237	1.6718	0.0216131	0.693948	Serine carboxypeptidase, putative	GO:0004185|GO:0006508	serine-type carboxypeptidase activity | proteolysis	19.4.2.2	Protein homeostasis.proteolysis.serine-type peptidase activities.S10-class serine carboxypeptidase (SCPL)	XP_010320342.1
Solyc11g044910	1.82033	4.53912	0.0216512	0.694546	Beta-D-xylosidase family protein	GO:0004553|GO:0005975	hydrolase activity, hydrolyzing O-glycosyl compounds | carbohydrate metabolic process	21.3.2.2.3.2	Cell wall organisation.pectin.rhamnogalacturonan I.modification and degradation.alpha-L-arabinofuranosidase activities.bifunctional alpha-L-arabinofuranosidase and beta-D-xylosidase (BXL)	NP_001266104.2
Solyc11g008620	-0.747497	5.02896	0.0217012	0.695528	Phosphoglycolate phosphatase	GO:0008152|GO:0016791	metabolic process | phosphatase activity	1.3.1 | 18.4.25.2	Photosynthesis.photorespiration.phosphoglycolate phosphatase | Protein modification.phosphorylation.aspartate-based protein phosphatase superfamily.phosphatase (CIN)	XP_004250073.1
Solyc03g033790	3.86498	1.60083	0.0217267	0.69572	P-loop containing nucleoside triphosphate hydrolases superfamily protein	GO:0005524	ATP binding	35.1	not assigned.annotated	XP_004234548.1
Solyc09g018030	1.19514	2.56084	0.0217875	0.696422	MACPF domain protein			35.1	not assigned.annotated	XP_010325754.1
Solyc12g098700	0.841476	5.42181	0.0217738	0.696422	RNA helicase DEAD42	GO:0003676|GO:0005524	nucleic acid binding | ATP binding	16.4.7.1.2	RNA processing.pre-mRNA splicing.spliceosome assembly and disassembly.RNA helicase activities.RNA helicase (Prp5)	XP_010314739.1	AT1G20920.1
Solyc02g084880	3.00496	-1.6176	0.0218558	0.697395	basic helix-loop-helix (bHLH) DNA-binding superfamily protein	GO:0046983	protein dimerization activity	15.5.32	RNA biosynthesis.transcriptional regulation.transcription factor (bHLH)	XP_004232434.2
Solyc03g034240	4.9685	-0.511092	0.0218604	0.697395	Abscisic acid-deficient 4			9.1.6.2.4 | 11.1.1.2	Secondary metabolism.terpenoids.carotenoid biosynthesis.xanthophylls.neoxanthin synthase (ABA4) | Phytohormone action.abscisic acid.biosynthesis.neoxanthin synthase (ABA4)	XP_004234570.1
Solyc09g091870	-5.88848	-3.24457	0.0218765	0.697395	Flavin-containing monooxygenase	GO:0016491|GO:0055114	oxidoreductase activity | oxidation-reduction process	11.2.1.1.2	Phytohormone action.auxin.biosynthesis.indole-3-pyruvic acid (IPyA) pathway.flavin monooxygenase (YUCCA)	XP_010326828.1	AT1G48910.1
Solyc09g090080	3.52221	3.32172	0.0220004	0.700722	Phosphate transporter	GO:0016021|GO:0022857|GO:0055085	integral component of membrane | transmembrane transporter activity | transmembrane transport	24.2.2.6 | 25.3.2.1	Solute transport.carrier-mediated transport.MFS superfamily.phosphate transporter (PHT1) | Nutrient uptake.phosphorus assimilation.phosphate uptake.phosphate transporter (PHT1)	NP_001318089.1	AT2G38940.1
Solyc07g054730	1.2246	6.22277	0.0220236	0.700837	LOW QUALITY:Wound-responsive family protein, putative			35.2	not assigned.not annotated	XP_010323709.1	AT4G28240.1
Solyc01g005920	-1.3534	1.46283	0.0220738	0.701811	Amino acid transporter, putative	GO:0003333|GO:0015171|GO:0016020	amino acid transmembrane transport | amino acid transmembrane transporter activity | membrane	24.2.3.5.1	Solute transport.carrier-mediated transport.APC superfamily.APC family.amino acid transporter (LAT)	XP_004228697.1	AT3G13620.1
Solyc05g012770	1.06866	3.9281	0.0221954	0.703791	WRKY transcription factor 4	GO:0003700|GO:0006355|GO:0043565	DNA-binding transcription factor activity | regulation of transcription, DNA-templated | sequence-specific DNA binding	15.5.22	RNA biosynthesis.transcriptional regulation.transcription factor (WRKY)	XP_004239088.1
Solyc06g009240	-4.99191	-0.597723	0.0223096	0.703791	Cation/H() antiporter 15	GO:0006812|GO:0015299|GO:0016021|GO:0055085	cation transport | solute:proton antiporter activity | integral component of membrane | transmembrane transport	24.2.8.2.1	Solute transport.carrier-mediated transport.CPA superfamily.CPA-2 family.proton:monovalent cation antiporter (CHX)	XP_004240555.1
Solyc06g052010	-1.73727	0.921701	0.0223205	0.703791	SUN-like protein 16	GO:0005515	protein binding	35.2	not assigned.not annotated	XP_004240959.1
Solyc06g063200	3.81865	-0.850922	0.0223473	0.703791	glutamate receptor-like 2.4	GO:0004970|GO:0016020	ionotropic glutamate receptor activity | membrane	24.3.9	Solute transport.channels.ligand-gated cation channel (GLR)	XP_004242263.1
Solyc08g013756	-1.9151	-0.817326	0.0223437	0.703791	F-box/LRR protein			35.2	not assigned.not annotated	XP_004244536.1
Solyc09g059040	0.821202	8.07561	0.0223526	0.703791	fructose 1,6-bisphosphate aldolase	GO:0055114	oxidation-reduction process	35.1	not assigned.annotated	NP_001333906.1
Solyc09g059220	5.62396	-2.92924	0.0221954	0.703791	LOW QUALITY:neuronal acetylcholine receptor subunit alpha-5			35.2	not assigned.not annotated	XP_004247063.1	AT2G31490.1
Solyc09g075720	1.08381	3.27811	0.0222435	0.703791	Kinase family protein	GO:0005524	ATP binding	18.4.1.37.1 | 26.8.1.1.5	Protein modification.phosphorylation.TKL protein kinase superfamily.RLCK-VII receptor-like protein kinase families.receptor-like protein kinase (RLCK-VIIa) | External stimuli response.pathogen.pattern-triggered immunity (PTI) network.bacterial elicitor response.protein kinase (PCRK)	XP_010326559.1
Solyc10g007890	6.24144	-1.55162	0.0222845	0.703791	Cytochrome P450	GO:0016705|GO:0055114	oxidoreductase activity, acting on paired donors, with incorporation or reduction of molecular oxygen | oxidation-reduction process	50.1.13	Enzyme classification.EC_1 oxidoreductases.EC_1.14 oxidoreductase acting on paired donor with incorporation or reduction of molecular oxygen	XP_004248200.1
Solyc10g083300	-4.98157	-2.74642	0.0222381	0.703791	cell-wall invertase	GO:0004553|GO:0005975	hydrolase activity, hydrolyzing O-glycosyl compounds | carbohydrate metabolic process	3.1.4.1.1	Carbohydrate metabolism.sucrose metabolism.degradation.invertase activities.acid beta-fructofuranosidase (CWIN)	NP_001311325.1
Solyc11g071400	5.25017	-2.46644	0.0222417	0.703791	I2C3			35.2	not assigned.not annotated	XP_004251230.1	AT3G14470.1
Solyc01g107850	1.32401	1.50753	0.0224229	0.704925	Glycosyltransferase			35.2	not assigned.not annotated	NP_001315561.1
Solyc05g013660	0.906293	3.75699	0.0224477	0.704925	lysine ketoglutarate reductase trans-splicing protein (DUF707)			35.2	not assigned.not annotated	XP_010320938.1
Solyc12g099330	0.797206	6.74898	0.0224328	0.704925	Unknown			17.1.2.1.30	Protein biosynthesis.ribosome biogenesis.large ribosomal subunit (LSU).LSU proteome.component RPL29	XP_010324588.1
Solyc01g066440	-1.17831	2.63854	0.0224812	0.705357	Acyl-CoA N-acyltransferases (NAT) superfamily protein			35.2	not assigned.not annotated	XP_004229260.1
Solyc08g079870	2.23007	6.32565	0.0225447	0.706729	subtilisin	GO:0004252|GO:0006508	serine-type endopeptidase activity | proteolysis	19.4.2.1	Protein homeostasis.proteolysis.serine-type peptidase activities.S8-class protease (subtilisin) families	NP_001233982.1
Solyc01g107853	1.69017	1.71349	0.0227666	0.712619	Glycosyltransferase	GO:0008152|GO:0016758	metabolic process | transferase activity, transferring hexosyl groups	35.1	not assigned.annotated	XP_019067418.1
Solyc02g069800	0.97023	8.07156	0.0227724	0.712619	LOW QUALITY:Abhydrolase superfamily protein	GO:0008152|GO:0016787	metabolic process | hydrolase activity	35.1	not assigned.annotated	NP_001316666.1	AT5G16080.1
Solyc05g050350	6.42838	-1.07553	0.0228611	0.714769	Cyclic nucleotide-gated channel	GO:0005216|GO:0006811|GO:0016020|GO:0055085	ion channel activity | ion transport | membrane | transmembrane transport	24.3.2.4	Solute transport.channels.VIC superfamily.cyclic nucleotide-gated cation channel (CNGC)	XP_010321519.1
Solyc10g083795	-0.822289	3.48394	0.0229275	0.716219	Cytochrome P450, putative	GO:0016705|GO:0055114	oxidoreductase activity, acting on paired donors, with incorporation or reduction of molecular oxygen | oxidation-reduction process	9.1.6.2.1.3	Secondary metabolism.terpenoids.carotenoid biosynthesis.xanthophylls.carotenoid hydroxylase activities.carotenoid epsilon-ring hydroxylase (LUT1)	NP_001234058.2
Solyc09g091380	-2.94681	-2.31446	0.0229775	0.717154	LOW QUALITY:WUSCHEL-related homeobox 3A			35.2	not assigned.not annotated
Solyc09g015360	-0.629576	5.0312	0.02302	0.717853	Chaperone protein DnaJ			35.1	not assigned.annotated	XP_004246295.1
Solyc09g011560	2.19905	1.05351	0.0231436	0.721082	Glutathione S-transferase	GO:0005515	protein binding	18.8.1.4	Protein modification.S-glutathionylation.glutathione S-transferase activities.class tau glutathione S-transferase	XP_004246384.1	AT3G09270.1
Solyc01g111880	-1.40307	3.46359	0.0231837	0.721269	MAP kinase kinase kinase 11	GO:0008152|GO:0016597	metabolic process | amino acid binding	18.4.1.30	Protein modification.phosphorylation.TKL protein kinase superfamily.protein kinase (MAP3K-RAF)	XP_004231067.1
Solyc03g118410	-0.995975	4.67862	0.0232101	0.721269	Acyl carrier protein	GO:0006633	fatty acid biosynthetic process	5.1.4.1 | 5.1.5.1	Lipid metabolism.fatty acid biosynthesis.plastidial fatty acid synthase (ptFAS) system.acyl carrier protein (ptACP) | Lipid metabolism.fatty acid biosynthesis.mitochondrial fatty acid synthase (mtFAS) system.acyl carrier protein (mtACP)	NP_001234522.1
Solyc04g063370	-4.27322	-2.82705	0.0232069	0.721269	Receptor-like kinase	GO:0005524	ATP binding	50.2.7	Enzyme classification.EC_2 transferases.EC_2.7 transferase transferring phosphorus-containing group	XP_010320012.1
Solyc05g052210	0.875708	4.85144	0.0232347	0.721404	transmembrane protein			35.2	not assigned.not annotated	XP_004239972.1
Solyc05g012510	-0.868906	6.43998	0.0233211	0.72255	Alpha-1,4 glucan phosphorylase	GO:0005975|GO:0008184	carbohydrate metabolic process | glycogen phosphorylase activity	3.2.3.3.4	Carbohydrate metabolism.starch metabolism.degradation.hydrolysis and phosphorolysis.plastidial alpha-glucan phosphorylase	XP_004239069.1
Solyc06g071990	-0.681002	5.75737	0.0233055	0.72255	ATPase family AAA domain-containing protein 1			35.2	not assigned.not annotated	XP_004241530.1
Solyc07g063880	3.98717	-2.5493	0.0233322	0.72255	Beta-glucosidase, putative	GO:0005975	carbohydrate metabolic process	50.3.2	Enzyme classification.EC_3 hydrolases.EC_3.2 glycosylase	XP_004244167.1
Solyc00g019950	6.6487	-2.71285	0.0234103	0.72309	NADH dehydrogenase subunit 9	GO:0016651|GO:0055114	oxidoreductase activity, acting on NAD(P)H | oxidation-reduction process	2.4.1.2.2	Cellular respiration.oxidative phosphorylation.NADH dehydrogenase complex.module Q (electron output) components.component NQO5	YP_009430462.1	ATMG00070.1
Solyc05g051570	0.766614	6.95316	0.0234059	0.72309	Ras-related protein	GO:0005525|GO:0007264	GTP binding | small GTPase mediated signal transduction	22.8.1.8	Vesicle trafficking.regulation of membrane tethering and fusion.RAB-GTPase activities.H-class RAB GTPase	XP_004240017.1
Solyc12g014430	-1.61914	2.02108	0.0233978	0.72309	Cellulose synthase-like protein	GO:0016020|GO:0016760|GO:0030244	membrane | cellulose synthase (UDP-forming) activity | cellulose biosynthetic process	21.1.1	Cell wall organisation.cellulose.cellulose synthase complex (CSC)	XP_004251907.1
Solyc01g102950	-2.74313	-0.196561	0.0234437	0.723497	Lycopene beta/epsilon cyclase	GO:0016491|GO:0055114	oxidoreductase activity | oxidation-reduction process	35.2	not assigned.not annotated	XP_004230408.1
Solyc09g098270	-3.6793	-3.06212	0.0235536	0.726263	Pectin lyase-like superfamily protein	GO:0004650|GO:0005975	polygalacturonase activity | carbohydrate metabolic process	50.3.2	Enzyme classification.EC_3 hydrolases.EC_3.2 glycosylase	XP_004248040.1
Solyc09g007030	2.24571	1.35151	0.023627	0.727274	Kinesin-like protein	GO:0003777|GO:0005524|GO:0007018|GO:0008017	microtubule motor activity | ATP binding | microtubule-based movement | microtubule binding	20.1.3.4	Cytoskeleton organisation.microtubular network.Kinesin microtubule-based motor protein activities.motor protein (Kinesin-5)	XP_004246926.2
Solyc12g032933	-1.80662	0.117393	0.0236253	0.727274	CBS domain-containing protein	GO:0005515	protein binding	35.1	not assigned.annotated	XP_004252206.2
Solyc09g092120	0.596411	5.65703	0.0237061	0.729079	Alkaline ceramidase 3	GO:0006672|GO:0016021|GO:0016811	ceramide metabolic process | integral component of membrane | hydrolase activity, acting on carbon-nitrogen (but not peptide) bonds, in linear amides	5.7.5.1.2	Lipid metabolism.lipid degradation.sphingolipid degradation.ceramidase activities.alkaline ceramidase (ACER)	XP_010326849.1
Solyc02g094290	-3.17642	-1.99055	0.0237381	0.729436	TCP transcription factor 27			15.5.19 | 27.1.5.2	RNA biosynthesis.transcriptional regulation.transcription factor (TCP) | Multi-process regulation.circadian clock system.morning element regulation.activation factor (TCP20)	XP_025885512.1	AT3G27010.1
Solyc03g071690	-1.4174	1.73908	0.0238184	0.731276	Non-symbiotic hemoglobin 1	GO:0019825|GO:0020037	oxygen binding | heme binding	35.1	not assigned.annotated	NP_001234111.1
Solyc03g112040	4.61892	3.02846	0.0239055	0.731475	Cytochrome P450	GO:0016705|GO:0055114	oxidoreductase activity, acting on paired donors, with incorporation or reduction of molecular oxygen | oxidation-reduction process	50.1.13	Enzyme classification.EC_1 oxidoreductases.EC_1.14 oxidoreductase acting on paired donor with incorporation or reduction of molecular oxygen	XP_004236279.1	AT3G48280.1
Solyc07g044760	-0.612712	8.12482	0.0238918	0.731475	RNA helicase DEAD23	GO:0003676|GO:0005524	nucleic acid binding | ATP binding	16.12.2.2.1.4	RNA processing.organelle machinery.pre-mRNA splicing.mitochondrial RNA splicing.group-II intron splicing.RNA helicase (PMH)	XP_010323935.2
Solyc08g068880	0.629006	5.64492	0.0239067	0.731475	enhanced disease resistance-like protein (DUF1336)			35.1	not assigned.annotated	XP_004245295.1	AT5G10750.1
Solyc12g011010	-3.38997	2.06016	0.0238661	0.731475	protodermal factor 1			35.1	not assigned.annotated	XP_004251814.1
Solyc04g057980	-1.30965	2.03843	0.0240458	0.734476	Orange Ripening	GO:0016655|GO:0055114	oxidoreductase activity, acting on NAD(P)H, quinone or similar compound as acceptor | oxidation-reduction process	1.1.8.1.2.6	Photosynthesis.photophosphorylation.chlororespiration.NADH dehydrogenase-like (NDH) complex.subcomplex A.component NdhM	XP_004237361.1
Solyc11g011300	-1.55444	2.95206	0.0240338	0.734476	Rhamnogalacturonate lyase family protein	GO:0030246	carbohydrate binding	35.2	not assigned.not annotated	XP_019066804.1
Solyc08g008150	3.17307	1.96341	0.0241365	0.736618	LOW QUALITY:Late embryogenesis abundant hydroxyproline-rich glycoprotein			35.2	not assigned.not annotated	XP_010324637.1	AT2G46150.1
Solyc01g066720	0.709635	8.34679	0.0242266	0.737477	Hypoxia-responsive family protein			35.2	not assigned.not annotated	XP_004229248.1
Solyc01g108300	-0.671033	5.99958	0.0242138	0.737477	Myb family transcription factor	GO:0003677	DNA binding	15.5.2.3	RNA biosynthesis.transcriptional regulation.MYB transcription factor superfamily.transcription factor (GARP)	NP_001297051.1
Solyc03g117580	-1.71959	0.782414	0.0242186	0.737477	GAG1At protein			23.1.2.5	Protein translocation.chloroplast.outer envelope TOC translocation system.regulatory factor (Toc12)	XP_004235893.1
Solyc06g066820	3.34798	-0.276476	0.0242609	0.737894	Le3OH-13b-hydroxylase	GO:0016491|GO:0055114	oxidoreductase activity | oxidation-reduction process	11.6.1.6	Phytohormone action.gibberellin.biosynthesis.gibberellin 3-oxidase	NP_001233848.2
Solyc01g095640	-5.43556	-3.28183	0.0242846	0.737989	Myb family transcription factor	GO:0003677	DNA binding	15.5.2.2	RNA biosynthesis.transcriptional regulation.MYB transcription factor superfamily.transcription factor (MYB-related)	XP_010326918.1
Solyc01g098400	-1.31957	4.29378	0.0243346	0.738264	Histidine-containing phosphotransfer protein, putative	GO:0000160|GO:0004871	phosphorelay signal transduction system | obsolete signal transducer activity	11.4.2.2	Phytohormone action.cytokinin.perception and signal transduction.signal transducer (AHP)	XP_004230155.1
Solyc02g071800	-1.20722	3.66934	0.0243496	0.738264	Receptor-like protein kinase	GO:0005515	protein binding	18.4.1.8.2 | 18.4.1.19	Protein modification.phosphorylation.TKL protein kinase superfamily.LRR-VIII protein kinase families.protein kinase (LRR-VIII-2) | Protein modification.phosphorylation.TKL protein kinase superfamily.protein kinase (L-lectin)	XP_010316871.2
Solyc12g094610	2.50452	-0.318392	0.0243556	0.738264	U-box domain-containing 15-like protein	GO:0005515	protein binding	35.1	not assigned.annotated	XP_004253124.1
Solyc02g081845	-2.11672	-0.996039	0.024518	0.742556	non-specific phospholipase C5			24.2.3.5.2	Solute transport.carrier-mediated transport.APC superfamily.APC family.cationic amino acid transporter (CAT)	XP_004240713.1
Solyc09g061320	1.03923	5.12219	0.024568	0.743443	Solute carrier family 35 protein	GO:0006810|GO:0016021	transport | integral component of membrane	24.2.1.7	Solute transport.carrier-mediated transport.DMT superfamily.solute transporter (TPPT)	XP_004247090.1
Solyc03g043770	-1.88182	1.44117	0.0246586	0.745115	Non-specific serine/threonine protein kinase	GO:0005515	protein binding	18.4.1.11	Protein modification.phosphorylation.TKL protein kinase superfamily.protein kinase (LRR-XI)	XP_004234641.1
Solyc09g031770	-0.802159	2.78697	0.0246649	0.745115	JOSEPHIN-like protein	GO:0004843|GO:0016579	thiol-dependent ubiquitin-specific protease activity | protein deubiquitination	35.1	not assigned.annotated	XP_004246965.1
Solyc02g068850	5.45767	-2.73813	0.0247198	0.745512	LOW QUALITY:receptor-like kinase			35.2	not assigned.not annotated	XP_004237587.1
Solyc07g040880	6.34144	-0.970955	0.0247084	0.745512	Gibberellin receptor GID1, putative	GO:0008152|GO:0016787	metabolic process | hydrolase activity	35.1	not assigned.annotated	XP_010324041.1
Solyc06g062420	2.67599	2.72171	0.0248552	0.748965	transmembrane protein			35.2	not assigned.not annotated	XP_019068099.2
Solyc02g032650	1.95891	1.55506	0.0248837	0.749192	Disease resistance protein (TIR-NBS-LRR class)	GO:0043531	ADP binding	26.8.2.1	External stimuli response.pathogen.effector-triggered immunity (ETI) network.effector receptor (NLR)	XP_010315689.1
Solyc06g084300	1.32287	2.72032	0.0249367	0.749526	Outer envelope membrane family protein			35.2	not assigned.not annotated	XP_010316935.1	AT3G52420.1
Solyc07g008520	1.20412	2.39757	0.0249174	0.749526	Peptide transporter	GO:0005215|GO:0006857|GO:0016020	transporter activity | oligopeptide transport | membrane	24.2.2.9	Solute transport.carrier-mediated transport.MFS superfamily.anion transporter (NRT1/PTR)	XP_010323334.1
Solyc01g091420	-2.05959	0.728861	0.0250544	0.751362	LOB domain-containing protein, putative			15.5.24	RNA biosynthesis.transcriptional regulation.transcription factor (AS2/LOB)	XP_004231166.1
Solyc04g078850	-0.773427	4.02788	0.0250305	0.751362	DNA-directed RNA polymerase subunit			35.1	not assigned.annotated	NP_001233874.1
Solyc12g011280	-1.87708	1.36429	0.0250608	0.751362	Chlorophyll a-b binding protein, chloroplastic	GO:0009765|GO:0016020	photosynthesis, light harvesting | membrane	1.1.4.1.3	Photosynthesis.photophosphorylation.photosystem I.LHC-I complex.component LHCa3	XP_004251826.1
Solyc02g083860	-1.49413	3.32172	0.0251362	0.75148	flavanone 3-dioxygenase	GO:0016491|GO:0055114	oxidoreductase activity | oxidation-reduction process	9.2.2.4.3	Secondary metabolism.phenolics.flavonoid biosynthesis.dihydroflavonols.flavanone 3-hydroxylase	NP_001316412.1
Solyc02g085960	-3.92376	-3.24564	0.0250933	0.75148	LOW QUALITY:Starch synthase, chloroplastic/amyloplastic			35.2	not assigned.not annotated	XP_004238749.1
Solyc03g119390	-1.53233	-0.775538	0.0251403	0.75148	bHLH transcription factor 026	GO:0046983	protein dimerization activity	15.5.32 | 26.1.2.1.2	RNA biosynthesis.transcriptional regulation.transcription factor (bHLH) | External stimuli response.light.UV-A/blue light.cryptochrome-mediated photoperception.transcriptional regulator (CIB)	XP_004235809.1
Solyc05g055820	-2.43796	-0.799046	0.0251488	0.75148	Haloacid dehalogenase-like hydrolase (HAD) superfamily protein	GO:0008152|GO:0016787	metabolic process | hydrolase activity	7.10.9	Coenzyme metabolism.FMN/FAD biosynthesis.FMN hydrolase	XP_010321332.1	AT1G79790.1
Solyc07g064140	-1.63405	0.0908953	0.0251776	0.751713	Ammonium transporter 1 member 1			35.2	not assigned.not annotated	XP_019069219.2
Solyc03g007740	0.781611	8.30225	0.0252487	0.75258	Reticulon-like protein			13.7.2.1	Cell cycle organisation.membrane organisation.endoplasmic reticulum (ER) organisation.ER-associated protein (Reticulon)	XP_004234204.1
Solyc11g039860	1.84391	3.09802	0.0252293	0.75258	LOW QUALITY:Tetratricopeptide repeat (TPR)-like superfamily protein			35.2	not assigned.not annotated	XP_004247646.1
Solyc09g011520	4.24054	3.02997	0.0253499	0.754967	Glutathione S-transferase-like protein	GO:0005515	protein binding	18.8.1.4	Protein modification.S-glutathionylation.glutathione S-transferase activities.class tau glutathione S-transferase	XP_004246386.1
Solyc03g117740	-0.691537	4.43746	0.0254594	0.756396	nuclear protein	GO:0016491|GO:0055114	oxidoreductase activity | oxidation-reduction process	35.2	not assigned.not annotated	XP_004235881.1
Solyc04g051390	1.44659	-1.04679	0.0255036	0.756396	LOW QUALITY:Cation-transporting P-type ATPase			35.2	not assigned.not annotated	XP_010323748.1
Solyc06g064840	0.996556	3.90901	0.0254282	0.756396	AGAMOUS MADS box factor transcription factor	GO:0003700|GO:0005634|GO:0006355	DNA-binding transcription factor activity | nucleus | regulation of transcription, DNA-templated	15.5.14	RNA biosynthesis.transcriptional regulation.transcription factor (MADS/AGL)	XP_025887358.1
Solyc09g061340	0.943605	3.86567	0.0254769	0.756396	Pentatricopeptide repeat-containing protein			35.1	not assigned.annotated	XP_010313676.1	AT2G13600.1
Solyc09g098420	-3.69509	-3.10323	0.0254912	0.756396	Leucine-rich repeat receptor protein kinase EXS	GO:0005524	ATP binding	11.10.1.7.2 | 18.4.1.10.2	Phytohormone action.signalling peptides.NCRP (non-cysteine-rich-peptide) category.TDL-peptide activity.TDL-peptide receptor (EMS1/MSP1) | Protein modification.phosphorylation.TKL protein kinase superfamily.LRR-X protein kinase families.protein kinase (LRR-Xb)	XP_025888658.1
Solyc06g062540	-1.52815	2.6802	0.0255756	0.757274	putative acid phosphatase	GO:0016791	phosphatase activity	5.2.4.5.1	Lipid metabolism.glycerolipid biosynthesis.phosphatidylcholine.choline homeostasis.phosphocholine phosphatase	NP_001266264.1
Solyc09g009160	-5.40125	-3.31984	0.0255686	0.757274	Aminotransferase-like			35.2	not assigned.not annotated	XP_025888795.1
Solyc08g078410	-4.87081	-3.54306	0.0256235	0.758065	ethylene-responsive transcription factor	GO:0003700|GO:0006355	DNA-binding transcription factor activity | regulation of transcription, DNA-templated	15.5.7.2	RNA biosynthesis.transcriptional regulation.AP2/ERF transcription factor superfamily.transcription factor (DREB)	XP_004229764.1	AT5G25810.1
Solyc03g006590	-3.16759	-2.75562	0.0258046	0.762793	Multidrug resistance 3			35.2	not assigned.not annotated	XP_004234260.1
Solyc09g007220	3.74312	-1.33334	0.0258315	0.762958	LOW QUALITY:F-box protein	GO:0005515	protein binding	35.2	not assigned.not annotated	XP_010326161.1
Solyc04g081660	1.29445	1.55091	0.0258624	0.76324	cyclinB2_3			35.2	not assigned.not annotated	XP_004238428.1
Solyc06g062580	-2.28789	0.579732	0.0259117	0.764063	Beta-galactosidase	GO:0030246	carbohydrate binding	21.3.2.2.2	Cell wall organisation.pectin.rhamnogalacturonan I.modification and degradation.beta-galactosidase (BGAL)	XP_004241849.1
Solyc08g078670	-0.862598	7.24941	0.0259661	0.765038	LOW QUALITY:Eukaryotic aspartyl protease family protein	GO:0004190|GO:0006508	aspartic-type endopeptidase activity | proteolysis	19.4.3.1	Protein homeostasis.proteolysis.aspartic-type peptidase activities.A1-class protease (Pepsin)	XP_004245764.1	AT4G16563.1
Solyc12g098600	-1.33917	4.06796	0.0260077	0.765632	Glycosyltransferase	GO:0008152|GO:0016758	metabolic process | transferase activity, transferring hexosyl groups	50.2.4 | 3	Enzyme classification.EC_2 transferases.EC_2.4 glycosyltransferase | Carbohydrate metabolism	XP_004252977.1	AT4G14090.1
Solyc02g065490	-5.07249	-2.01211	0.0260792	0.766807	BEL1-related homeotic protein 22	GO:0003677|GO:0006355	DNA binding | regulation of transcription, DNA-templated	15.5.3.5	RNA biosynthesis.transcriptional regulation.Homeobox transcription factor superfamily.transcription factor (BEL)	XP_004233410.1
Solyc07g061900	-0.74397	5.16464	0.0260905	0.766807	50S ribosomal protein L4, putative	GO:0003735|GO:0005840|GO:0006412	structural constituent of ribosome | ribosome | translation	17.7.2.1.4	Protein biosynthesis.organelle machinery.plastidial ribosome.large ribosomal subunit proteome.component psRPL4	XP_004244314.1
Solyc08g069200	-1.39217	-0.241271	0.0262028	0.768845	LOW QUALITY:Chlorophyll synthase, chloroplastic			35.2	not assigned.not annotated	XP_010316060.1
Solyc08g075550	2.4499	2.9383	0.0261957	0.768845	alternative oxidase 1au	GO:0009916|GO:0055114	alternative oxidase activity | oxidation-reduction process	2.4.2.2	Cellular respiration.oxidative phosphorylation.alternative NAD(P)H dehydrogenase activities.alternative oxidase (AOx)	NP_001234120.1
Solyc01g088430	2.14909	-1.19813	0.0262682	0.770132	Fatty acid hydroxylase superfamily protein	GO:0005506|GO:0006633|GO:0016491|GO:0055114	iron ion binding | fatty acid biosynthetic process | oxidoreductase activity | oxidation-reduction process	21.9.1.7.1.1	Cell wall organisation.cutin and suberin.cuticular lipid formation.alkane-forming pathway.CER1-CER3 alkane-forming complex.aldehyde decarbonylase component CER1	XP_004229695.1
Solyc02g050330	-1.23586	2.09212	0.026346	0.770472	Late embryogenesis abundant protein At1g64065			35.2	not assigned.not annotated	XP_004245659.1
Solyc07g037930	3.61397	-3.16328	0.0264521	0.770472	LOW QUALITY:alanine:glyoxylate aminotransferase 2			35.2	not assigned.not annotated	XP_010312765.1
Solyc08g029000	4.31446	2.69375	0.0263805	0.770472	Lipoxygenase	GO:0016702|GO:0046872|GO:0055114	oxidoreductase activity, acting on single donors with incorporation of molecular oxygen, incorporation of two atoms of oxygen | metal ion binding | oxidation-reduction process	50.1.12 | 5	Enzyme classification.EC_1 oxidoreductases.EC_1.13 oxidoreductase acting on single donor with incorporation of molecular oxygen (oxygenase) | Lipid metabolism	XP_004244890.1
Solyc08g065190	0.82166	5.04097	0.0263728	0.770472	zinc transporter	GO:0016020|GO:0030001|GO:0046873|GO:0055085	membrane | metal ion transport | metal ion transmembrane transporter activity | transmembrane transport	24.2.11.1	Solute transport.carrier-mediated transport.ZIP family.metal cation transporter (ZIP)	XP_004245100.1
Solyc09g056220	6.29868	-2.77067	0.0263876	0.770472	LOW QUALITY:Cellulase (glycosyl hydrolase family 5) protein			35.2	not assigned.not annotated	XP_004233910.2
Solyc11g065550	-3.4828	-3.0804	0.0264458	0.770472	LOW QUALITY:Leucine-rich repeat protein kinase family protein			35.2	not assigned.not annotated	XP_025885119.1
Solyc11g069210	-3.66563	-2.71522	0.0264331	0.770472	Carbamoyl-phosphate synthase large chain			35.2	not assigned.not annotated	XP_004251399.2
Solyc12g099340	0.695563	5.48225	0.0264431	0.770472	calmodulin-binding transcription activator	GO:0005515	protein binding	15.5.26	RNA biosynthesis.transcriptional regulation.transcription factor (CAMTA)	XP_025884248.1
Solyc01g103862	1.10345	2.69351	0.0265005	0.771253	Basic-leucine zipper (bZIP) transcription factor family protein			15.5.14	RNA biosynthesis.transcriptional regulation.transcription factor (MADS/AGL)	XP_025883492.1
Solyc08g069060	1.43607	3.16884	0.0265728	0.772729	Hexosyltransferase	GO:0006486|GO:0008378|GO:0016020	protein glycosylation | galactosyltransferase activity | membrane	35.2	not assigned.not annotated	XP_004245304.1
Solyc02g071050	1.29054	4.07224	0.0266349	0.773904	Purine permease	GO:0005215|GO:0016021	transporter activity | integral component of membrane	24.2.1.6	Solute transport.carrier-mediated transport.DMT superfamily.organic cation transporter (PUP)	XP_004233091.1
Solyc11g008010	0.721203	6.63013	0.0267511	0.77602	NAC domain protein,	GO:0003677|GO:0006355	DNA binding | regulation of transcription, DNA-templated	15.5.17	RNA biosynthesis.transcriptional regulation.transcription factor (NAC)	NP_001315569.1
Solyc11g066820	-1.03843	6.82925	0.0267498	0.77602	Cellulose synthase-like protein			21.2.3.1.1.1	Cell wall organisation.hemicellulose.heteromannan.biosynthesis.mannan synthase activities.mannan synthase (CSLA)	XP_004251009.1
Solyc06g054310	4.19183	-2.43351	0.0268417	0.776758	LOW QUALITY:Fantastic four-like protein			35.1	not assigned.annotated	XP_010322261.1	AT5G19260.1
Solyc12g098710	0.987198	9.76622	0.0268122	0.776758	15-cis-zeta-carotene isomerase			9.1.6.1.3	Secondary metabolism.terpenoids.carotenoid biosynthesis.carotenes.zeta-carotene isomerase (Z-ISO)	NP_001334551.1
Solyc12g099930	-1.14617	5.73055	0.0268399	0.776758	alanine:glyoxylate aminotransferase	GO:0003824	catalytic activity	1.3.3.2 | 4.1.2.1.3	Photosynthesis.photorespiration.aminotransferase activities.serine-glyoxylate transaminase | Amino acid metabolism.biosynthesis.aspartate family.asparagine.asparagine aminotransaminase	XP_025884246.1
Solyc05g054530	-1.38691	0.195059	0.0269454	0.7785	Transmembrane protein, putative			35.2	not assigned.not annotated	XP_004239786.1	AT5G59350.1
Solyc10g049710	-0.670231	7.95769	0.0269449	0.7785	ATP-dependent Clp protease proteolytic subunit	GO:0004252|GO:0006508	serine-type endopeptidase activity | proteolysis	19.4.2.9.2	Protein homeostasis.proteolysis.serine-type peptidase activities.chloroplast Clp-type protease complex.non-proteolytic core component ClpR	XP_004248765.1
Solyc05g052355	5.61349	-2.91031	0.0270294	0.779667	NAD(P)H-quinone oxidoreductase chain 4, chloroplastic			35.1	not assigned.annotated	XP_004247111.1
Solyc09g092110	-2.72513	2.94977	0.0270288	0.779667	Light-regulated			1.1.5.2.3	Photosynthesis.photophosphorylation.linear electron flow.ferredoxin-NADP reductase (FNR) activity.FNR-regulatory protein (LIR1)	XP_004247868.1
Solyc02g063120	-3.95759	-3.02894	0.0271388	0.780315	LOW QUALITY:auxin transport protein (BIG)			35.2	not assigned.not annotated	XP_019067732.1
Solyc03g111793	1.77185	2.1435	0.0271089	0.780315	Receptor-like protein kinase	GO:0005515	protein binding	18.4.1.3	Protein modification.phosphorylation.TKL protein kinase superfamily.protein kinase (LRR-III)	NP_001306257.1
Solyc11g005360	0.671357	5.02324	0.0270959	0.780315	BolA protein			7.11.1.2.6	Coenzyme metabolism.iron-sulfur cluster assembly machinery.plastidial SUF system.transfer phase.redox-dependent regulator (BolA2)	XP_004249872.1
Solyc11g072700	2.34341	-1.73398	0.0271391	0.780315	LOW QUALITY:transferring glycosyl group transferase (DUF604)			35.2	not assigned.not annotated	XP_004251447.1	AT4G23490.1
Solyc01g105360	-1.64171	1.72379	0.0271787	0.780826	Glycosyltransferase	GO:0008152|GO:0016758	metabolic process | transferase activity, transferring hexosyl groups	50.2.4	Enzyme classification.EC_2 transferases.EC_2.4 glycosyltransferase	XP_004230580.1
Solyc05g010720	1.00209	3.05797	0.0272312	0.781706	Enoyl-CoA hydratase/isomerase family protein	GO:0003824|GO:0008152	catalytic activity | metabolic process	5.7.3.5.1	Lipid metabolism.lipid degradation.fatty acid degradation.auxiliary degradation activities.dodecenoyl-CoA isomerase	XP_004239013.1
Solyc08g081450	-2.7642	-1.72294	0.0272627	0.781982	Nuclear transport factor 2 (NTF2) family protein			35.2	not assigned.not annotated	XP_010325385.1
Solyc03g118190	3.01928	0.638279	0.0273898	0.782216	Ethylene-responsive transcription factor	GO:0003700|GO:0006355	DNA-binding transcription factor activity | regulation of transcription, DNA-templated	15.5.7.1	RNA biosynthesis.transcriptional regulation.AP2/ERF transcription factor superfamily.transcription factor (ERF)	XP_004235847.1
Solyc04g078990	-3.32712	-2.61952	0.027402	0.782216	Hexosyltransferase	GO:0016757	transferase activity, transferring glycosyl groups	21.2.2.1.2.1	Cell wall organisation.hemicellulose.xylan.biosynthesis.glucuronosyltransferase activities.glucuronosyltransferase (GUX)	XP_004238159.1
Solyc06g073090	-0.905051	5.46294	0.0273691	0.782216	chloroplast-specific ribosomal protein chloroplast-specific ribosomal protein	GO:0044238	primary metabolic process	17.7.2.3.1	Protein biosynthesis.organelle machinery.plastidial ribosome.plastidial ribosome-associated proteins.hibernation-promoting factor (PSRP1)	NP_001233834.1
Solyc07g062900	1.30066	0.538047	0.0273327	0.782216	Protein yippee-like			35.2	not assigned.not annotated	XP_010324374.1
Solyc08g007920	4.75818	-1.70401	0.0273436	0.782216	SUN-like protein 19	GO:0005515	protein binding	35.2	not assigned.not annotated	XP_004244720.1
Solyc12g005560	-3.10071	-2.80724	0.0273352	0.782216	LOW QUALITY:Micronuclear linker histone polyprotein-like protein			35.2	not assigned.not annotated	XP_010313662.1
Solyc05g005360	-2.83427	-2.54827	0.027433	0.782476	Transcription factor	GO:0046982	protein heterodimerization activity	15.5.51.2	RNA biosynthesis.transcriptional regulation.NF-Y transcription factor complex.component NF-YB	XP_010320571.1
Solyc05g013170	0.867013	3.76392	0.0274724	0.782975	GCK domain-containing protein			35.2	not assigned.not annotated	XP_004239109.1	AT1G14060.1
Solyc01g106340	-2.5172	-0.623163	0.0275211	0.783115	fatty acid amide hydrolase	GO:0004040	amidase activity	35.1	not assigned.annotated	XP_004230544.1
Solyc01g106910	-2.00959	-0.888403	0.0275139	0.783115	At4g33800-like protein			35.2	not assigned.not annotated	XP_004230686.1
Solyc09g014790	0.660631	6.61593	0.0275745	0.784011	Pentatricopeptide repeat (PPR) superfamily protein			22.5.5.1.1	Vesicle trafficking.endomembrane trafficking.protein recycling.ubiquitylated cargo adaptors.associated protein (TOM)	NP_001234190.1
Solyc03g120640	-0.766414	6.65953	0.0276651	0.784713	Photosystem I reaction center subunit VI	GO:0009522|GO:0009538|GO:0015979	photosystem I | photosystem I reaction center | photosynthesis	1.1.4.2.8	Photosynthesis.photophosphorylation.photosystem I.PS-I complex.component PsaH	XP_004235674.1
Solyc08g076025	-1.60317	0.648647	0.0276578	0.784713	Tudor/PWWP/MBT superfamily protein			12.3.3.1.2.5	Chromatin organisation.histone modifications.histone lysine methylation.PRC2 histone methylation complex.associated protein factors.histone H3 methylation reader (PWO)	XP_004245942.1
Solyc12g013665	4.5231	-0.654555	0.0276467	0.784713	Mannan endo-1,4-beta-mannosidase 1	GO:0005975	carbohydrate metabolic process	21.2.3.2.2	Cell wall organisation.hemicellulose.heteromannan.modification and degradation.endo-beta-1,4-mannanase	XP_025884462.1
Solyc01g094100	-4.9367	-3.00262	0.027696	0.784969	Cytochrome P450 family protein	GO:0005506|GO:0016705|GO:0020037|GO:0055114	iron ion binding | oxidoreductase activity, acting on paired donors, with incorporation or reduction of molecular oxygen | heme binding | oxidation-reduction process	50.1.13	Enzyme classification.EC_1 oxidoreductases.EC_1.14 oxidoreductase acting on paired donor with incorporation or reduction of molecular oxygen	XP_004229915.3	AT2G45510.1
Solyc01g096270	0.626277	7.5962	0.0278444	0.78855	Cytochrome b5	GO:0020037	heme binding	21.9.1.7.1.3	Cell wall organisation.cutin and suberin.cuticular lipid formation.alkane-forming pathway.CER1-CER3 alkane-forming complex.component Cyt-b5	XP_010327261.1
Solyc04g079910	-3.88594	-2.81248	0.0279415	0.790674	Calcium uniporter protein, mitochondrial			24.3.15.1	Solute transport.channels.MCU calcium uniporter complex.channel component MCU	XP_004238222.1
Solyc01g010770	1.40084	2.347	0.0279941	0.790911	Hypersensitive-induced response protein			24.4.1	Solute transport.porins.voltage-gated anion channel (VDAC)	XP_004228385.1
Solyc08g041710	-0.728814	5.20512	0.0279783	0.790911	transmembrane protein			35.2	not assigned.not annotated	XP_004244937.1
Solyc01g006540	2.07905	7.83987	0.0281906	0.792453	lipoxygenase C	GO:0016702|GO:0046872|GO:0055114	oxidoreductase activity, acting on single donors with incorporation of molecular oxygen, incorporation of two atoms of oxygen | metal ion binding | oxidation-reduction process	50.1.12	Enzyme classification.EC_1 oxidoreductases.EC_1.13 oxidoreductase acting on single donor with incorporation of molecular oxygen (oxygenase)	NP_001233812.2
Solyc02g067700	2.30193	-0.500081	0.0281043	0.792453	RING/U-box superfamily protein, putative	GO:0005515|GO:0008270	protein binding | zinc ion binding	35.1	not assigned.annotated	XP_025885060.1	AT1G72310.1
Solyc02g085640	0.603604	5.80569	0.0281377	0.792453	Xaa-Pro aminopeptidase 1	GO:0070006	metalloaminopeptidase activity	50.3.4	Enzyme classification.EC_3 hydrolases.EC_3.4 hydrolase acting on peptide bond (peptidase)	NP_001233921.1
Solyc02g089940	-1.00596	3.46418	0.0281536	0.792453	BIPINNATA	GO:0003677|GO:0006355	DNA binding | regulation of transcription, DNA-templated	15.5.3.5	RNA biosynthesis.transcriptional regulation.Homeobox transcription factor superfamily.transcription factor (BEL)	XP_025885388.1
Solyc02g094635	-2.66263	-2.64976	0.0282038	0.792453	Glutamate formiminotransferase 1	GO:0005542|GO:0008152|GO:0016740	folic acid binding | metabolic process | transferase activity	35.2	not assigned.not annotated	XP_004243327.1
Solyc11g010440	0.73411	5.26959	0.0281795	0.792453	GRAM domain protein/ABA-responsive-like protein			35.1	not assigned.annotated	XP_004250134.1
Solyc11g073180	5.52212	-2.73488	0.0281157	0.792453	TOX high mobility group box protein, putative (DUF1635)			35.2	not assigned.not annotated	XP_010313554.1
Solyc07g066460	-0.753145	5.52022	0.028232	0.792625	Protein Iojap			35.1	not assigned.annotated	XP_004243983.1
Solyc03g096380	0.90501	4.3483	0.0282749	0.793205	proline transporter 2			24.2.3.4.3	Solute transport.carrier-mediated transport.APC superfamily.AAAP family.proline transporter (ProT)	NP_001233990.1
Solyc03g113340	0.805699	4.69439	0.0283023	0.793351	Nodulin-like / Major Facilitator Superfamily protein			24.2.2.16	Solute transport.carrier-mediated transport.MFS superfamily.anion transporter (Fabaceae-N70)	XP_004236183.1
Solyc01g099630	-1.4788	6.85102	0.0284589	0.794008	xyloglucan endotransglucosylase-hydrolase 1	GO:0010411|GO:0016762|GO:0042546	xyloglucan metabolic process | xyloglucan:xyloglucosyl transferase activity | cell wall biogenesis	50.2.4 | 21.2.1.2.6	Enzyme classification.EC_2 transferases.EC_2.4 glycosyltransferase | Cell wall organisation.hemicellulose.xyloglucan.modification and degradation.xyloglucan endotransglucosylase/hydrolase	NP_001233858.1
Solyc02g005530	-4.6166	-3.37398	0.0283747	0.794008	PIF1-like helicase			35.2	not assigned.not annotated	XP_010315542.1
Solyc02g081890	-2.43412	0.0196749	0.0284228	0.794008	Core-2/I-branching beta-1,6-N-acetylglucosaminyltransferase family protein, putative	GO:0008375|GO:0016020	acetylglucosaminyltransferase activity | membrane	35.1	not assigned.annotated	XP_004232624.1
Solyc04g073980	-1.17014	2.30057	0.0284568	0.794008	pumilio 7	GO:0005488	binding	35.1	not assigned.annotated	XP_004238523.2
Solyc06g066270	-4.72394	-2.42082	0.0283989	0.794008	Cytochrome P450, putative	GO:0016705|GO:0055114	oxidoreductase activity, acting on paired donors, with incorporation or reduction of molecular oxygen | oxidation-reduction process	50.1.13	Enzyme classification.EC_1 oxidoreductases.EC_1.14 oxidoreductase acting on paired donor with incorporation or reduction of molecular oxygen	XP_019069883.1	AT2G45550.1
Solyc06g082300	-1.78476	0.686081	0.0283631	0.794008	UDP-glycosyltransferase	GO:0008152|GO:0016758	metabolic process | transferase activity, transferring hexosyl groups	15.5.24	RNA biosynthesis.transcriptional regulation.transcription factor (AS2/LOB)	XP_004242498.1
Solyc12g044930	0.899796	4.8454	0.0284902	0.794262	F-box family protein	GO:0005515	protein binding	35.1	not assigned.annotated	XP_004252380.2
Solyc01g009510	-5.90034	-3.21707	0.0287252	0.794866	BZIP transcription factor	GO:0003700|GO:0006355|GO:0043565	DNA-binding transcription factor activity | regulation of transcription, DNA-templated | sequence-specific DNA binding	15.5.4.1	RNA biosynthesis.transcriptional regulation.bZIP transcription factor superfamily.transcription factor (bZIP)	XP_010326740.1
Solyc01g097000	-1.06156	3.63092	0.028823	0.794866	Beta-glucosidase	GO:0004553|GO:0005975	hydrolase activity, hydrolyzing O-glycosyl compounds | carbohydrate metabolic process	50.3.2 | 3	Enzyme classification.EC_3 hydrolases.EC_3.2 glycosylase | Carbohydrate metabolism	XP_004230073.1
Solyc01g105050	-1.18834	5.15975	0.0287803	0.794866	Chlorophyll a-b binding protein, chloroplastic	GO:0009765|GO:0016020	photosynthesis, light harvesting | membrane	1.1.1.1.4 | 5.1.4.3	Photosynthesis.photophosphorylation.photosystem II.LHC-II complex.component LHCb6 | Lipid metabolism.fatty acid biosynthesis.plastidial fatty acid synthase (ptFAS) system.hydroxyacyl-ACP dehydratase (ptHD)	NP_001296291.1
Solyc02g062790	-5.38161	-2.42086	0.0287921	0.794866	Receptor-like kinase	GO:0005524	ATP binding	18.4.1.22	Protein modification.phosphorylation.TKL protein kinase superfamily.protein kinase (PERK)	XP_019067727.1
Solyc02g072520	0.824817	4.15798	0.0286414	0.794866	Receptor kinase, putative	GO:0005515	protein binding	18.4.1.7	Protein modification.phosphorylation.TKL protein kinase superfamily.protein kinase (LRR-VII)	XP_004233046.1
Solyc02g077220	-1.4394	1.72668	0.0286013	0.794866	GDSL esterase/lipase	GO:0016788	hydrolase activity, acting on ester bonds	35.1	not assigned.annotated	XP_004232954.1
Solyc02g084330	1.33454	2.28197	0.0287824	0.794866	decapping 5-like protein			35.2	not assigned.not annotated	XP_010322058.1
Solyc02g090840	0.744592	9.01123	0.0287173	0.794866	DUF1685 family protein			35.2	not assigned.not annotated	XP_004232033.1
Solyc03g117090	0.687244	4.07355	0.0286631	0.794866	stress response NST1-like protein			35.2	not assigned.not annotated	XP_004235928.1
Solyc06g073395	3.09875	-1.7057	0.0286916	0.794866	Pentatricopeptide repeat (PPR) superfamily protein			35.2	not assigned.not annotated	XP_004239469.1
Solyc08g048390	-0.62785	4.77995	0.0285938	0.794866	TCP transcription factor 24			15.5.19	RNA biosynthesis.transcriptional regulation.transcription factor (TCP)	NP_001233831.1
Solyc08g080050	-0.812131	5.42192	0.0288099	0.794866	PGRL1A transmembrane protein			1.1.6.1.2	Photosynthesis.photophosphorylation.cyclic electron flow.PGR5/PGRL1 complex.component PGRL1-like	XP_004245668.1
Solyc09g059270	-0.625611	7.59191	0.0286354	0.794866	ER lumen retaining receptor family-like protein	GO:0006621|GO:0016021|GO:0046923	protein retention in ER lumen | integral component of membrane | ER retention sequence binding	35.1	not assigned.annotated	XP_004247062.1
Solyc12g036720	2.51117	-1.69097	0.028745	0.794866	LOW QUALITY:Maturase	GO:0006397	mRNA processing	35.1	not assigned.annotated	YP_009430467.1	ATCG01280.1
Solyc12g096800	6.43124	-2.12871	0.0288711	0.79558	LOW QUALITY:HXXXD-type acyl-transferase family protein, putative	GO:0016747	transferase activity, transferring acyl groups other than amino-acyl groups	50.2.3	Enzyme classification.EC_2 transferases.EC_2.3 acyltransferase	XP_004253179.1	AT3G26040.1
Solyc04g009020	-1.0191	2.70366	0.0289169	0.795615	PsbB mRNA maturation factor Mbb1	GO:0006396	RNA processing	16.12.4.5	RNA processing.organelle machinery.RNA stability.psbH/psbB-transcript stability factor (HCF107)	XP_010319339.1
Solyc12g014140	-2.72939	-1.0226	0.0289012	0.795615	SlTCP3			15.5.19	RNA biosynthesis.transcriptional regulation.transcription factor (TCP)	NP_001234367.2
Solyc07g008210	-2.30259	5.93633	0.0289486	0.795875	Tetratricopeptide repeat (TPR)-like superfamily protein	GO:0005515	protein binding	35.2	not assigned.not annotated	XP_004242780.1
Solyc09g042728	5.74191	-3.29409	0.0289749	0.795986	trichome birefringence-like protein (DUF828)			35.2	not assigned.not annotated	XP_010322093.1
Solyc01g111340	1.37196	3.16949	0.0290713	0.798022	Endo-1,4-beta-xylanase A	GO:0005975	carbohydrate metabolic process	35.1	not assigned.annotated	XP_025884654.1
Solyc04g076970	-2.02684	-0.254242	0.0291703	0.7989	transcription factor-like protein	GO:0006351|GO:0043565	transcription, DNA-templated | sequence-specific DNA binding	15.5.4.5	RNA biosynthesis.transcriptional regulation.bZIP transcription factor superfamily.transcription factor (DOG)	XP_004238547.1
Solyc10g080030	-2.79239	-1.57548	0.0291673	0.7989	MADS-box transcription factor	GO:0003700|GO:0005634|GO:0006355	DNA-binding transcription factor activity | nucleus | regulation of transcription, DNA-templated	15.5.14	RNA biosynthesis.transcriptional regulation.transcription factor (MADS/AGL)	XP_004249753.1
Solyc11g066410	-0.777156	5.17641	0.0291367	0.7989	50S ribosomal protein L9	GO:0003735|GO:0005622|GO:0005840|GO:0006412	structural constituent of ribosome | intracellular | ribosome | translation	17.7.2.1.7	Protein biosynthesis.organelle machinery.plastidial ribosome.large ribosomal subunit proteome.component psRPL9	XP_010313308.1
Solyc08g066290	1.03073	1.71405	0.0294219	0.805175	low-molecular-weight cysteine-rich 2			35.1	not assigned.annotated	XP_019068724.1
Solyc04g071165	1.18163	4.58389	0.0294464	0.805229	Vacuolar iron transporter			24.2.12.3	Solute transport.carrier-mediated transport.VIT family.iron cation transporter (VTL)	XP_004237778.1
Solyc10g006000	-2.00277	0.615039	0.0294801	0.805535	Protein DEK	GO:0003677	DNA binding	35.2	not assigned.not annotated	XP_004248305.1
Solyc07g049650	2.34062	-0.966986	0.0295338	0.806385	LOW QUALITY:josephin-like protein			35.2	not assigned.not annotated	XP_004241911.1
Solyc01g091540	-4.99505	-3.52853	0.0295934	0.80678	Growth-regulating factor	GO:0005634|GO:0006351|GO:0032502	nucleus | transcription, DNA-templated | developmental process	15.5.52.1	RNA biosynthesis.transcriptional regulation.GRF-GIF transcription factor complex.component GRF	XP_010325825.1
Solyc04g015010	3.00417	-0.308107	0.0295845	0.80678	Microtubule-associated protein 70-5	GO:0007010|GO:0008017	cytoskeleton organization | microtubule binding	35.1	not assigned.annotated	XP_004236657.1
Solyc01g109550	-2.85986	-1.67388	0.0298205	0.807559	Mitochondrial transcription termination factor family protein	GO:0003690|GO:0006355	double-stranded DNA binding | regulation of transcription, DNA-templated	15.6.2.2	RNA biosynthesis.organelle machinery.transcriptional regulation.transcription factor (mTERF)	XP_004230958.2	AT3G18870.1
Solyc02g062610	-0.899805	2.32769	0.0297764	0.807559	alpha/beta-Hydrolases superfamily protein			35.1	not assigned.annotated	XP_004233528.1
Solyc02g084410	2.04246	0.985059	0.0298251	0.807559	Lactoylglutathione lyase / glyoxalase I family protein	GO:0004462|GO:0046872	lactoylglutathione lyase activity | metal ion binding	9.5	Secondary metabolism.glucosinolates	XP_004232464.1
Solyc03g082430	-4.25294	-3.0481	0.0296921	0.807559	LOW QUALITY:Growth-regulating factor	GO:0005634|GO:0006351|GO:0032502	nucleus | transcription, DNA-templated | developmental process	15.5.52.1	RNA biosynthesis.transcriptional regulation.GRF-GIF transcription factor complex.component GRF	XP_010318056.1	AT5G53660.1
Solyc06g010030	2.39856	0.284265	0.029815	0.807559	MLO-like protein	GO:0006952|GO:0016021	defense response | integral component of membrane	35.1	not assigned.annotated	XP_004240581.1
Solyc06g074560	-6.39399	-2.91778	0.0296876	0.807559	LOW QUALITY:GATA transcription factor 19			35.2	not assigned.not annotated	XP_004233721.1
Solyc07g054740	-1.2394	2.45378	0.029711	0.807559	Vesicle-associated 4-2-like protein	GO:0005789	endoplasmic reticulum membrane	35.1	not assigned.annotated	XP_004243312.1
Solyc08g036560	0.795426	3.55896	0.0297865	0.807559	Phosphate transporter			35.2	not assigned.not annotated	XP_010321808.1
Solyc10g045480	2.55684	-1.47329	0.0297776	0.807559	LOW QUALITY:calmodulin-binding protein (DUF1645)			35.2	not assigned.not annotated	XP_004248958.2	AT2G15760.1
Solyc11g066250	-2.15638	-0.460677	0.0299771	0.811059	Carboxypeptidase	GO:0004185|GO:0006508	serine-type carboxypeptidase activity | proteolysis	19.4.2.2	Protein homeostasis.proteolysis.serine-type peptidase activities.S10-class serine carboxypeptidase (SCPL)	XP_004250970.1
Solyc05g053050	2.95182	-1.74556	0.0300305	0.811891	LOW QUALITY:cyclin-dependent kinase inhibitor			13.1.1.3.2	Cell cycle organisation.cell cycle control.cyclin-dependent regulation.cyclin-dependent protein kinase inhibitor activities.inhibitor (SIM)	XP_025888670.1	AT5G02220.1
Solyc01g099810	0.764212	6.60567	0.0301576	0.812405	RNA-binding (RRM/RBD/RNP motifs) family protein	GO:0003676	nucleic acid binding	16.4.6.1	RNA processing.pre-mRNA splicing.spliceosome-associated non-snRNP factor activities.splicing factor (SR30|34)	XP_019067053.1
Solyc01g108670	-3.18843	-1.03653	0.0301631	0.812405	Kinesin motor family protein	GO:0003777|GO:0005524|GO:0007018|GO:0008017	microtubule motor activity | ATP binding | microtubule-based movement | microtubule binding	13.4.3.7 | 20.1.3.10	Cell cycle organisation.cytokinesis.phragmoplast microtubule organization.phragmoplast integrity regulator (Kinesin-12) | Cytoskeleton organisation.microtubular network.Kinesin microtubule-based motor protein activities.motor protein (Kinesin-12)	XP_010315270.1
Solyc02g069250	2.32508	2.42111	0.0301267	0.812405	Cinnamyl alcohol dehydrogenase	GO:0055114	oxidation-reduction process	50.1.1	Enzyme classification.EC_1 oxidoreductases.EC_1.1 oxidoreductase acting on CH-OH group of donor	XP_004233212.1
Solyc05g054090	-1.54868	8.91079	0.0300971	0.812405	UDP-3-O-acyl N-acetylglycosamine deacetylase family protein			35.2	not assigned.not annotated	XP_004239829.1
Solyc10g085300	0.677364	5.3645	0.030123	0.812405	uncharacterized protein			35.1	not assigned.annotated	NP_001310886.1
Solyc02g092400	2.29932	-1.50477	0.030298	0.813359	Late embryogenesis abundant hydroxyproline-rich glycoprotein family, putative			35.2	not assigned.not annotated	NP_001233914.1	AT3G54200.1
Solyc02g092410	-1.10793	2.32151	0.0302613	0.813359	Adenylyl-sulfate kinase	GO:0000103|GO:0004020|GO:0005524	sulfate assimilation | adenylylsulfate kinase activity | ATP binding	25.2.1.2	Nutrient uptake.sulfur assimilation.sulfate assimilation.APS kinase	XP_004231928.1
Solyc04g010190	-0.886061	4.73135	0.0302431	0.813359	Chlorophyll a-b binding protein, chloroplastic			1.1.1.6.1.4	Photosynthesis.photophosphorylation.photosystem II.LHC-related protein groups.two-helix LHC-related protein group.protein (SEP4)	XP_004236772.1	AT3G12345.1
Solyc08g066700	0.921835	8.38186	0.0302927	0.813359	Exosome complex exonuclease RRP46 homolog			16.8.1.1.6	RNA processing.RNA surveillance.exosome complex.EXO9 core complex.component RRP46	XP_004245172.1
Solyc09g074590	-4.47372	-0.998976	0.0303577	0.813359	Glutaredoxin	GO:0009055|GO:0015035|GO:0045454	electron transfer activity | protein disulfide oxidoreductase activity | cell redox homeostasis	18.8.2	Protein modification.S-glutathionylation.glutaredoxin	XP_004247455.1	AT5G18600.1
Solyc12g005940	2.46126	2.08371	0.0303131	0.813359	1-aminocyclopropane-1-carboxylate oxidase 1	GO:0016491|GO:0055114	oxidoreductase activity | oxidation-reduction process	11.5.1.2	Phytohormone action.ethylene.biosynthesis.1-aminocyclopropane-1-carboxylate (ACC) oxidase	NP_001316842.1
Solyc12g096420	0.72627	5.80126	0.0303465	0.813359	RING/U-box superfamily protein	GO:0005515|GO:0008270	protein binding | zinc ion binding	35.1	not assigned.annotated	XP_004253058.1
Solyc01g098640	-0.946704	4.25203	0.0304714	0.813966	Thylakoid lumen 18.3 kDa protein			1.1.1.3.12	Photosynthesis.photophosphorylation.photosystem II.assembly and maintenance.assembly factor (Psb32)	XP_004230168.1
Solyc04g079710	2.05358	-0.750803	0.0304514	0.813966	Kinase, putative	GO:0005524	ATP binding	18.4.1.25	Protein modification.phosphorylation.TKL protein kinase superfamily.protein kinase (WAK/WAKL)	XP_004238203.1
Solyc05g054670	1.17266	1.95701	0.0304062	0.813966	nuclease			27	Multi-process regulation	XP_004239775.1
Solyc10g005330	-1.14043	2.10296	0.0304622	0.813966	Homeobox-leucine zipper family protein	GO:0008289	lipid binding	15.5.3.3	RNA biosynthesis.transcriptional regulation.Homeobox transcription factor superfamily.transcription factor (HD-ZIP IV)	XP_010327237.1
Solyc07g006550	-2.62252	-2.25221	0.0305182	0.814608	Ribonuclease S-6			35.2	not assigned.not annotated	XP_004242665.1
Solyc08g080110	0.698317	5.55858	0.0305519	0.814899	Protein FAM63A	GO:0004843|GO:1990380	thiol-dependent ubiquitin-specific protease activity | Lys48-specific deubiquitinase activity	35.2	not assigned.not annotated	XP_004245663.1
Solyc05g043410	-5.73719	-2.96225	0.0306808	0.815371	LOW QUALITY:BTB/POZ domain-containing protein At5g60050			35.2	not assigned.not annotated	XP_004228639.1
Solyc06g065900	0.672496	6.61548	0.0306821	0.815371	Serine-rich protein-related			35.2	not assigned.not annotated	XP_025887374.1
Solyc09g014910	3.34328	-0.0252353	0.0306781	0.815371	LURP-one-like protein			35.1	not assigned.annotated	XP_010325781.1
Solyc10g083335	4.65892	-2.9804	0.0306836	0.815371	ERD (early-responsive to dehydration stress) family protein			35.2	not assigned.not annotated	XP_004239638.1
Solyc12g042390	-5.55219	-1.70272	0.0306357	0.815371	LOW QUALITY:Werner Syndrome-like exonuclease	GO:0003676|GO:0006139|GO:0008408	nucleic acid binding | nucleobase-containing compound metabolic process | 3'-5' exonuclease activity	35.2	not assigned.not annotated	XP_004252474.1	AT2G36110.1
Solyc12g036415	1.60907	3.55812	0.030722	0.815787	SAUR-like auxin-responsive protein family			35.2	not assigned.not annotated	XP_025886693.1
Solyc12g087990	0.845343	2.97921	0.0308105	0.817529	Hydroxyproline-rich glycoprotein family protein, putative			35.1	not assigned.annotated	XP_004252719.1
Solyc01g081490	-0.846353	4.67614	0.0308691	0.818476	Sigma factor	GO:0003677|GO:0003700|GO:0006352|GO:0006355|GO:0016987	DNA binding | DNA-binding transcription factor activity | DNA-templated transcription, initiation | regulation of transcription, DNA-templated | sigma factor activity	15.6.2.1	RNA biosynthesis.organelle machinery.transcriptional regulation.basal transcription factor (Sigma)	XP_004229543.1
Solyc09g059460	2.57622	-1.96783	0.0309745	0.820665	Vacuolar iron transporter (VIT) family protein			24.2.12.2	Solute transport.carrier-mediated transport.VIT family.metal cation transporter (MEB)	XP_004247067.1
Solyc12g014395	-1.2949	-0.225279	0.0310454	0.821932	Ribosomal protein L13 family protein	GO:0003735|GO:0005840|GO:0006412	structural constituent of ribosome | ribosome | translation	17.7.2.1.11	Protein biosynthesis.organelle machinery.plastidial ribosome.large ribosomal subunit proteome.component psRPL13	NP_001310974.1
Solyc01g090710	-2.17859	-0.593535	0.0311478	0.823769	cytosolic malate dehydrogenase	GO:0016616|GO:0055114	oxidoreductase activity, acting on the CH-OH group of donors, NAD or NADP as acceptor | oxidation-reduction process	1.4.2 | 5.1.1.3	Photosynthesis.CAM/C4 photosynthesis.NAD-dependent malate dehydrogenase | Lipid metabolism.fatty acid biosynthesis.citrate shuttle.cytosolic NAD-dependent malate dehydrogenase	NP_001234152.1
Solyc02g092970	5.0122	-3.27824	0.0311608	0.823769	ADP-ribosylation factor	GO:0005525|GO:0005622|GO:0007264	GTP binding | intracellular | small GTPase mediated signal transduction	22.3.2.1	Vesicle trafficking.Coat protein I (COPI) coatomer machinery.coat protein recruiting.ARF-GTPase	XP_004231879.2
Solyc05g053890	-1.62188	1.10095	0.0312549	0.825038	Glycosyltransferase	GO:0008152|GO:0016758	metabolic process | transferase activity, transferring hexosyl groups	50.2.4	Enzyme classification.EC_2 transferases.EC_2.4 glycosyltransferase	XP_004240208.2
Solyc08g067530	-3.69168	-1.43826	0.0312526	0.825038	Non-specific lipid-transfer protein	GO:0006869|GO:0008289	lipid transport | lipid binding	35.1	not assigned.annotated	XP_004245407.1	AT2G38540.1
Solyc06g083510	0.815933	3.48517	0.0313234	0.825627	DNA-directed RNA polymerase III subunit	GO:0006359	regulation of transcription by RNA polymerase III	15.4.5.3	RNA biosynthesis.RNA polymerase III-dependent transcription.TFIIIe transcription factor complex.component RPC31	XP_004242397.1
Solyc12g019550	-1.69186	1.35882	0.0313118	0.825627	Lipase maturation factor 2			5.7.1	Lipid metabolism.lipid degradation.triacylglycerol lipase activities	XP_004252001.1
Solyc01g087830	-2.16899	-1.68436	0.0313608	0.825939	LOW QUALITY:Subtilisin-like protease	GO:0004252|GO:0006508	serine-type endopeptidase activity | proteolysis	35.1	not assigned.annotated	NP_001234774.1	AT5G51750.1
Solyc05g018770	-4.89719	-2.45747	0.0314045	0.825939	alpha/beta-Hydrolases superfamily protein			35.2	not assigned.not annotated	XP_010320961.1
Solyc09g014710	2.68467	-1.80078	0.0313894	0.825939	Kinase, putative	GO:0030247	polysaccharide binding	18.4.1.25	Protein modification.phosphorylation.TKL protein kinase superfamily.protein kinase (WAK/WAKL)	XP_004246320.1
Solyc01g066190	-4.01672	-0.992873	0.0314401	0.826266	LOW QUALITY:Splicing factor 3B subunit 3			35.2	not assigned.not annotated	XP_004244948.1
Solyc03g080080	-0.813677	3.50591	0.0315071	0.827097	Calcium-binding endonuclease/exonuclease/phosphatase family			35.1	not assigned.annotated	XP_004235036.1
Solyc10g006510	0.729419	3.50728	0.0315179	0.827097	bHLH transcription factor152	GO:0046983	protein dimerization activity	15.5.32 | 25.4.1.2	RNA biosynthesis.transcriptional regulation.transcription factor (bHLH) | Nutrient uptake.iron uptake.regulation.signal transduction factor (PRI1)	XP_004248337.1
Solyc03g119660	4.30912	-2.0846	0.0315946	0.827895	Plant cadmium resistance 2			35.1	not assigned.annotated	XP_004236417.1
Solyc06g071150	-4.92672	-3.14548	0.0315848	0.827895	HIPL1-like protein	GO:0005975|GO:0016901|GO:0048038	carbohydrate metabolic process | oxidoreductase activity, acting on the CH-OH group of donors, quinone or similar compound as acceptor | quinone binding	35.1	not assigned.annotated	XP_004242164.1
Solyc10g076420	0.632429	5.18325	0.0316857	0.829675	DUF538 family protein (Protein of unknown function, DUF538)			35.1	not assigned.annotated	XP_004249066.1
Solyc02g080400	-2.16419	-1.63286	0.0317716	0.831314	Abnormal spindle-like microcephaly-associated-like protein, putative	GO:0007051	spindle organization	19.1.8.5	Protein homeostasis.protein quality control.smallHsp holdase chaperone activities.class-C-V protein	XP_010316597.1
Solyc08g066240	-2.62497	11.8022	0.0319052	0.834201	Histidine decarboxylase	GO:0016831|GO:0019752|GO:0030170	carboxy-lyase activity | carboxylic acid metabolic process | pyridoxal phosphate binding	35.1	not assigned.annotated	XP_004245144.1
Solyc07g065900	-2.31856	0.785924	0.0319857	0.835693	fructose-bisphosphate aldolase, cytoplasmic isozyme 1	GO:0004332|GO:0006096	fructose-bisphosphate aldolase activity | glycolytic process	2.1.1.2 | 3.1.2.2	Cellular respiration.glycolysis.cytosolic glycolysis.aldolase | Carbohydrate metabolism.sucrose metabolism.biosynthesis.cytosolic fructose-bisphosphate aldolase	NP_001296956.1
Solyc05g056050	-2.67644	3.20824	0.0320949	0.837324	Chlorophyll a-b binding protein, chloroplastic	GO:0009765|GO:0016020	photosynthesis, light harvesting | membrane	1.1.4.1.1	Photosynthesis.photophosphorylation.photosystem I.LHC-I complex.component LHCa1	XP_004239673.1
Solyc10g009440	-3.78147	-3.30738	0.0320888	0.837324	Transcription factor	GO:0046982	protein heterodimerization activity	15.5.51.2	RNA biosynthesis.transcriptional regulation.NF-Y transcription factor complex.component NF-YB	XP_004248456.1
Solyc03g114450	-0.750059	5.29661	0.0321645	0.838527	Calcium-sensing receptor			26.5.1.2	External stimuli response.drought.stomatal closure signalling.calcium sensor (CAS)	XP_004236097.1
Solyc03g111270	0.61093	5.09731	0.0322132	0.839185	SAP domain-containing protein			35.2	not assigned.not annotated	XP_004236334.1	AT5G63460.4
Solyc05g018510	-1.09411	3.23255	0.0323713	0.84269	Drug resistance transporter-like ABC domain protein	GO:0016020	membrane	21.9.4.3 | 24.1.3.2.2	Cell wall organisation.cutin and suberin.export.cuticular lipid exporter (PEC1) | Solute transport.primary active transport.ABC superfamily.ABC2 family.subfamily ABCG transporter	XP_010321067.1
Solyc08g023590	1.15687	0.986568	0.0323964	0.84273	Transducin/WD40 repeat protein	GO:0005515	protein binding	35.2	not assigned.not annotated	XP_025888289.1
Solyc04g016460	4.43885	2.32744	0.032474	0.844135	receptor-like kinase in flowers 1			35.2	not assigned.not annotated	XP_004247447.1
Solyc01g011190	4.96751	-3.03977	0.0325369	0.844912	LOW QUALITY:Sec1 family domain-containing protein 2			35.2	not assigned.not annotated	XP_004251868.1	AT2G42700.2
Solyc06g068160	-1.26089	2.30809	0.0325511	0.844912	SNF4			35.1	not assigned.annotated	NP_001233959.1
Solyc03g119500	3.52238	-2.98285	0.0326183	0.846043	LOW QUALITY:F-box/LRR protein, putative	GO:0005515	protein binding	35.2	not assigned.not annotated	XP_025885977.1
Solyc01g087990	0.640856	5.38036	0.0327469	0.846173	MADS-box transcription factor AGAMOUS-like protein	GO:0003700|GO:0005634|GO:0006355	DNA-binding transcription factor activity | nucleus | regulation of transcription, DNA-templated	15.5.14	RNA biosynthesis.transcriptional regulation.transcription factor (MADS/AGL)	XP_004229674.1
Solyc01g105370	1.76068	5.72335	0.0326479	0.846173	Phospho-2-dehydro-3-deoxyheptonate aldolase	GO:0018580|GO:0055114	nitronate monooxygenase activity | oxidation-reduction process	4.1.5.1.1	Amino acid metabolism.biosynthesis.shikimate family.shikimate pathway.3-deoxy-D-arabino-heptulosonate 7-phosphate (DAHP) synthase	XP_004230569.1
Solyc07g053260	0.551907	8.84136	0.0327029	0.846173	tft9	GO:0019904	protein domain specific binding	35.1	not assigned.annotated	NP_001234272.1
Solyc10g055200	2.62308	4.55926	0.0327476	0.846173	Dirigent protein			35.1	not assigned.annotated	XP_004248663.1	AT2G21100.1
Solyc11g020550	2.86097	-1.83583	0.0327468	0.846173	LOW QUALITY:Forkhead-associated (FHA) domain-containing protein			35.2	not assigned.not annotated	XP_004229743.1
Solyc12g049500	5.10369	-3.47257	0.0327653	0.846173	DUF936 family protein			20.1.5.4.2	Cytoskeleton organisation.microtubular network.microtubule dynamics.cortical microtubule organisation.regulatory protein (CORD)	XP_004252522.1
Solyc04g040230	4.68015	-1.8813	0.0328511	0.847775	S-adenosyl-L-methionine-dependent methyltransferases superfamily protein	GO:0008168	methyltransferase activity	35.1	not assigned.annotated	XP_004249214.1
Solyc07g055720	-2.4527	1.70787	0.0328893	0.848151	Heat shock protein, putative			35.2	not assigned.not annotated	XP_004243244.1
Solyc02g065400	-0.846885	7.61884	0.0329361	0.848745	33kDa precursor protein of oxygen-evolving complex	GO:0016021	integral component of membrane	1.1.1.2.2.1	Photosynthesis.photophosphorylation.photosystem II.PS-II complex.oxygen-evolving center (OEC) extrinsic proteins.component OEC33/PsbO	NP_001296294.1
Solyc11g068680	-0.83666	3.55912	0.0330752	0.851717	ATP synthase protein I			35.2	not assigned.not annotated	XP_004251077.1
Solyc10g076180	5.37822	-1.88258	0.0331389	0.85213	ovate family protein 20	GO:0003677	DNA binding	15.5.37	RNA biosynthesis.transcriptional regulation.transcription factor (OFP)	XP_004249045.1	AT1G06920.1
Solyc12g094390	4.90845	-1.59213	0.0331171	0.85213	LOW QUALITY:Syringolide-induced protein 14-1-1			35.1	not assigned.annotated	XP_004253207.1	AT1G76070.1
Solyc04g079640	-0.945108	5.24735	0.0331674	0.85225	Cytochrome P450	GO:0016705|GO:0055114	oxidoreductase activity, acting on paired donors, with incorporation or reduction of molecular oxygen | oxidation-reduction process	50.1.13	Enzyme classification.EC_1 oxidoreductases.EC_1.14 oxidoreductase acting on paired donor with incorporation or reduction of molecular oxygen	XP_004238199.1
Solyc01g103590	-1.23933	3.70808	0.0332352	0.853377	Lactoylglutathione lyase / glyoxalase I family protein			35.2	not assigned.not annotated	XP_004230457.1
Solyc02g084220	0.871458	3.15771	0.0334285	0.857035	Sodium-dependent phosphate transporter 1			35.2	not assigned.not annotated	XP_004232476.1
Solyc05g012790	-0.94745	3.19446	0.0334632	0.857035	S-acyltransferase			35.1	not assigned.annotated	XP_004239090.1
Solyc08g078010	-0.712655	4.54586	0.0334734	0.857035	Ribosomal protein L19 family protein	GO:0003735|GO:0005622|GO:0005840|GO:0006412	structural constituent of ribosome | intracellular | ribosome | translation	17.7.2.1.17	Protein biosynthesis.organelle machinery.plastidial ribosome.large ribosomal subunit proteome.component psRPL19	XP_004245816.1
Solyc09g055230	-0.695267	5.52515	0.0334041	0.857035	Double Clp-N motif-containing P-loop nucleoside triphosphate hydrolases superfamily protein, putative	GO:0019538	protein metabolic process	11.9.2.3	Phytohormone action.strigolactone.perception and signal transduction.signal transducer (SMXL)	XP_004247009.1
Solyc01g091700	-1.30637	1.59833	0.0335657	0.858782	F-box family protein	GO:0005515	protein binding	35.1	not assigned.annotated	XP_004229840.1
Solyc00g226760	-5.5876	-3.33246	0.0336963	0.859052	Sulfotransferase	GO:0008146	sulfotransferase activity	11.3.3.1	Phytohormone action.brassinosteroid.conjugation and degradation.steroid sulphotransferase	XP_004253506.1	AT2G03760.1
Solyc04g054260	-1.40858	2.601	0.0336459	0.859052	Cytochrome P450 family protein	GO:0016705|GO:0055114	oxidoreductase activity, acting on paired donors, with incorporation or reduction of molecular oxygen | oxidation-reduction process	50.1.13	Enzyme classification.EC_1 oxidoreductases.EC_1.14 oxidoreductase acting on paired donor with incorporation or reduction of molecular oxygen	XP_004237435.1
Solyc09g007940	-2.64199	1.25896	0.033661	0.859052	Adenosine kinase, putative	GO:0016773	phosphotransferase activity, alcohol group as acceptor	6.1.2.3	Nucleotide metabolism.purines.salvage pathway.adenosine kinase	XP_004246653.1
Solyc11g011570	0.858605	3.41473	0.0336245	0.859052	RING/U-box superfamily protein	GO:0008270	zinc ion binding	35.2	not assigned.not annotated	XP_004250211.2	AT3G46620.1
Solyc12g098830	-0.585377	6.54434	0.0336946	0.859052	Cytosolic purine 5-nucleotidase, putative			35.2	not assigned.not annotated	XP_004252960.1
Solyc04g081690	1.37445	0.719406	0.0337537	0.859901	molybdopterin biosynthesis MoaE family protein			35.2	not assigned.not annotated	XP_004250369.1
Solyc06g073260	-1.21667	3.1855	0.033781	0.859985	chloroplast RNA binding protein	GO:0003824|GO:0050662	catalytic activity | coenzyme binding	16.12.1.5	RNA processing.organelle machinery.ribonuclease activities.endoribonuclease (CSP41)	XP_004241412.1
Solyc07g006855	4.14181	-1.56425	0.0338298	0.860615	CASP-like protein			35.1	not assigned.annotated	XP_004242688.1
Solyc03g096850	-0.818569	6.1826	0.0339076	0.861177	rubredoxin family protein	GO:0005515	protein binding	35.2	not assigned.not annotated	XP_004235309.1
Solyc06g074200	-1.19675	5.52661	0.0339241	0.861177	photosystem I subunit O			1.1.4.2.15	Photosynthesis.photophosphorylation.photosystem I.PS-I complex.component PsaO	XP_004241330.1
Solyc10g038080	-1.06003	5.18538	0.0338861	0.861177	Shikimate dehydrogenase, 3-dehydroquinate dehydratase	GO:0004764|GO:0055114	shikimate 3-dehydrogenase (NADP) activity | oxidation-reduction process	4.1.5.1.3	Amino acid metabolism.biosynthesis.shikimate family.shikimate pathway.3-dehydroquinate dehydratase and shikimate dehydrogenase	XP_010327280.1
Solyc07g047760	1.79709	-1.03571	0.0339538	0.861319	F-box protein family	GO:0005515	protein binding	35.1	not assigned.annotated	XP_004243873.1
Solyc02g085260	4.94744	-2.24793	0.0340103	0.862141	LOW QUALITY:Peptidase M20/M25/M40 family protein			35.2	not assigned.not annotated	XP_010316366.1
Solyc01g005500	5.62587	1.75513	0.034102	0.862308	NAD(P)-binding Rossmann-fold superfamily protein			35.1	not assigned.annotated	XP_004228706.1
Solyc04g080700	-0.757093	7.22405	0.0341374	0.862308	Bifunctional nuclease 1	GO:0004518	nuclease activity	35.1	not assigned.annotated	XP_025886664.1
Solyc05g005370	-3.9976	-2.85639	0.0341209	0.862308	Transcription factor	GO:0046982	protein heterodimerization activity	15.5.51.2	RNA biosynthesis.transcriptional regulation.NF-Y transcription factor complex.component NF-YB	XP_010320572.1
Solyc09g014930	1.30006	0.442501	0.0341146	0.862308	Pentatricopeptide repeat superfamily protein, putative			35.1	not assigned.annotated	XP_004246310.1	AT2G38420.1
Solyc10g083670	-1.40574	3.92545	0.0341277	0.862308	Cellulose synthase-like protein			50.2.4	Enzyme classification.EC_2 transferases.EC_2.4 glycosyltransferase	XP_004249461.1
Solyc03g096190	6.87391	-0.574935	0.0341703	0.862529	Receptor-kinase, putative	GO:0005524	ATP binding	18.4.1.12	Protein modification.phosphorylation.TKL protein kinase superfamily.protein kinase (LRR-XII)	XP_004235251.3
Solyc03g121020	1.09949	1.37793	0.0342261	0.862719	RNA polymerase II-associated factor 1 like	GO:0006368|GO:0016570|GO:0016593	transcription elongation from RNA polymerase II promoter | histone modification | Cdc73/Paf1 complex	15.3.6.1.1	RNA biosynthesis.RNA polymerase II-dependent transcription.transcription elongation.PAF1C transcription initiation and elongation complex.component ELF7/PAF1	XP_004235642.1
Solyc09g072860	-0.832175	3.25332	0.0342094	0.862719	fanconi anemia group F protein (FANCF)			35.2	not assigned.not annotated	XP_010326638.1
Solyc02g083980	-0.895517	2.53458	0.0343381	0.864932	Endoglucanase	GO:0004553|GO:0005975	hydrolase activity, hydrolyzing O-glycosyl compounds | carbohydrate metabolic process	35.1	not assigned.annotated	XP_004232483.1
Solyc04g076460	-0.804824	4.95115	0.0344858	0.867432	Leucine-rich repeat receptor-like protein kinase family protein	GO:0005515	protein binding	35.1	not assigned.annotated	XP_010320517.1
Solyc07g064260	1.30922	1.53282	0.0344844	0.867432	F-box/RNI superfamily protein	GO:0005515	protein binding	35.1	not assigned.annotated	XP_004244145.1	AT4G14103.2
Solyc12g036380	-1.37414	1.23962	0.0345829	0.869264	WRKY DNA-binding protein 31			35.2	not assigned.not annotated	XP_010312405.1
Solyc02g085080	-0.817996	3.92759	0.0346118	0.869378	Transmembrane protein 53			35.2	not assigned.not annotated	XP_004232422.3
Solyc08g080190	-2.95398	-1.9536	0.0347286	0.8717	Glucose-methanol-choline (GMC) oxidoreductase family protein	GO:0016614|GO:0055114	oxidoreductase activity, acting on CH-OH group of donors | oxidation-reduction process	35.1	not assigned.annotated	XP_004245659.1
Solyc07g066150	-1.37182	5.6082	0.0347734	0.872213	Photosystem I reaction center subunit V family protein	GO:0009522|GO:0015979|GO:0016168	photosystem I | photosynthesis | chlorophyll binding	1.1.4.2.7	Photosynthesis.photophosphorylation.photosystem I.PS-I complex.component PsaG	XP_004244001.1	AT1G55670.1
Solyc01g009860	0.866762	5.19781	0.0348784	0.873237	NAC domain protein	GO:0003677|GO:0006355	DNA binding | regulation of transcription, DNA-templated	15.5.17	RNA biosynthesis.transcriptional regulation.transcription factor (NAC)	NP_001233811.1
Solyc06g066410	-4.84139	-2.28759	0.0348613	0.873237	Profilin	GO:0003779	actin binding	20.2.2.3	Cytoskeleton organisation.microfilament network.actin polymerisation.profilin actin nucleation protein	XP_004241753.1
Solyc09g092290	2.09405	-1.06993	0.0348875	0.873237	Ph-3 resistance protein	GO:0043531	ADP binding	35.1	not assigned.annotated	XP_004247879.1	AT3G46530.1
Solyc06g068050	0.679832	4.8627	0.0349565	0.874353	Alba DNA/RNA-binding protein	GO:0003676	nucleic acid binding	15.3.7.2.1	RNA biosynthesis.RNA polymerase II-dependent transcription.transcription termination.R-loop removal.R-loop reader protein (ALBA1/2)	XP_004241699.1
Solyc02g085040	0.525552	6.22576	0.0350193	0.875312	GAMMA carbonic anhydrase			2.4.1.4.6	Cellular respiration.oxidative phosphorylation.NADH dehydrogenase complex.non-core components.carbonic anhydrase component	XP_004232424.1
Solyc03g098680	4.36266	-0.301463	0.0350729	0.87562	Kunitz trypsin inhibitor	GO:0004866	endopeptidase inhibitor activity	35.1	not assigned.annotated	XP_004235490.1
Solyc09g075820	2.93707	3.81817	0.0350806	0.87562	Sugar transporter protein 2	GO:0016021|GO:0022857|GO:0055085	integral component of membrane | transmembrane transporter activity | transmembrane transport	24.2.2.1.6	Solute transport.carrier-mediated transport.MFS superfamily.SP family.monosaccharide transporter (STP)	NP_001234785.2
Solyc07g019430	-4.77761	-3.5685	0.0351468	0.876049	Tetratricopeptide repeat (TPR)-like superfamily protein			35.2	not assigned.not annotated	XP_025887342.1
Solyc07g041770	-3.03335	-0.602265	0.0351448	0.876049	LOW QUALITY:Membrane lipoprotein			35.2	not assigned.not annotated	XP_004243712.1	AT3G42725.1
Solyc06g048730	-0.64311	5.74889	0.0352105	0.877026	Uroporphyrinogen decarboxylase	GO:0004853|GO:0006779	uroporphyrinogen decarboxylase activity | porphyrin-containing compound biosynthetic process	7.12.4.1	Coenzyme metabolism.tetrapyrrol biosynthesis.protoporphyrin IX formation.uroporphyrinogen III decarboxylase	XP_004240850.1
Solyc10g009010	-5.88803	-3.17212	0.0352935	0.878481	CBS domain-containing protein			35.1	not assigned.annotated	XP_004248114.1
Solyc03g118440	-3.00134	-2.06331	0.0353242	0.878635	knotted 1-binding protein			35.2	not assigned.not annotated	XP_010318660.1
Solyc02g065000	-1.05633	3.18554	0.0354846	0.878957	Calcium-binding EF-hand	GO:0005509	calcium ion binding	35.1	not assigned.annotated	XP_004233438.1	AT2G15680.1
Solyc03g083030	0.846075	4.70545	0.0354602	0.878957	ABL interactor-like protein 3			16.6.2.2.4 | 20.2.2.2.5	RNA processing.tRNA modification.N6-threonylcarbamoylation.KEOPS/EKC complex.component PCC1 | Cytoskeleton organisation.microfilament network.actin polymerisation.SCAR/WAVE ARP2/3-activating complex.component ABIL	XP_010318026.1
Solyc04g082240	4.94471	-2.80544	0.0354622	0.878957	LOW QUALITY:DUF241 domain protein			35.2	not assigned.not annotated	XP_004238628.1	AT1G76210.1
Solyc05g006440	-0.919725	4.79903	0.0354654	0.878957	Symbiotic receptor-like kinase			1.1.2.9.6	Photosynthesis.photophosphorylation.cytochrome b6/f complex.assembly.assembly factor (DAC)	XP_004238727.1
Solyc06g064550	-0.946335	3.99364	0.0353707	0.878957	Aspartokinase-homoserine dehydrogenase	GO:0016491|GO:0050661|GO:0055114	oxidoreductase activity | NADP binding | oxidation-reduction process	4.1.2.2.4	Amino acid metabolism.biosynthesis.aspartate family.aspartate-derived amino acids.bifunctional homoserine dehydrogenase and aspartate kinase	XP_004241850.1
Solyc09g057880	-0.803127	2.91774	0.0354539	0.878957	Far-red impaired responsive (FAR1) family protein	GO:0006355	regulation of transcription, DNA-templated	15.5.46	RNA biosynthesis.transcriptional regulation.transcription factor (FAR1)	XP_025888597.1
Solyc12g096430	-1.45599	-0.111257	0.0355263	0.87938	LOW QUALITY:Ubiquitin carboxyl-terminal hydrolase family protein	GO:0016579|GO:0036459	protein deubiquitination | thiol-dependent ubiquitinyl hydrolase activity	19.2.3.1.1.7	Protein homeostasis.ubiquitin-proteasome system.ubiquitin-fold protein deconjugation.ubiquitin deconjugation.UBP deubiquitinase activities.deubiquitinase (UBP15-21)	XP_010314797.1	AT2G24640.1
Solyc03g119240	1.86162	1.97447	0.0356298	0.880723	Protein kinase family protein	GO:0030247	polysaccharide binding	18.4.1.20	Protein modification.phosphorylation.TKL protein kinase superfamily.protein kinase (LRK10-1-like)	XP_025885974.1
Solyc05g009530	-0.697858	4.7632	0.0356169	0.880723	Dihydrolipoamide acetyltransferase component of pyruvate dehydrogenase complex	GO:0008152|GO:0016746	metabolic process | transferase activity, transferring acyl groups	5.1.2.2.2	Lipid metabolism.fatty acid biosynthesis.acetyl-CoA generation.plastidial pyruvate dehydrogenase complex.dihydrolipoamide acetyltransferase component E2	XP_004238940.1
Solyc01g087750	-2.74188	-1.56703	0.0356833	0.880828	Protein RETICULATA-RELATED 4, chloroplastic			35.1	not assigned.annotated	XP_004229662.1
Solyc11g072110	-0.841584	4.6791	0.0356717	0.880828	2-oxoglutarate (2OG) and Fe(II)-dependent oxygenase superfamily protein	GO:0016491|GO:0055114	oxidoreductase activity | oxidation-reduction process	50.1.13	Enzyme classification.EC_1 oxidoreductases.EC_1.14 oxidoreductase acting on paired donor with incorporation or reduction of molecular oxygen	XP_004251239.1
Solyc08g081910	-0.63288	4.83851	0.0357619	0.882159	V-type proton ATPase subunit E	GO:0015991|GO:0033178|GO:0046961	proton-transporting two-sector ATPase complex, catalytic domain | proton-transporting ATPase activity, rotational mechanism	24.1.1.2.5	Solute transport.primary active transport.V-type ATPase complex.peripheral V1 subcomplex.subunit E	XP_004245546.1
Solyc04g072050	-0.645733	5.51735	0.0358109	0.882627	Transmembrane protein, putative			50.2.7	Enzyme classification.EC_2 transferases.EC_2.7 transferase transferring phosphorus-containing group	XP_004237839.1
Solyc09g090380	0.786513	3.34061	0.0358302	0.882627	Embryo sac development arrest 6, putative			35.2	not assigned.not annotated	XP_004247749.1	AT3G23440.1
Solyc04g009435	3.05649	-1.69155	0.0358779	0.883195	NAC domain protein	GO:0003677|GO:0006355	DNA binding | regulation of transcription, DNA-templated	15.5.17	RNA biosynthesis.transcriptional regulation.transcription factor (NAC)	NP_001234482.1
Solyc03g098100	0.842812	4.09709	0.035943	0.884188	NAD(P)H-dependent oxidoreductase	GO:0016491|GO:0055114	oxidoreductase activity | oxidation-reduction process	50.1.1	Enzyme classification.EC_1 oxidoreductases.EC_1.1 oxidoreductase acting on CH-OH group of donor	NP_001340421.1
Solyc03g033745	1.35471	0.27734	0.0359954	0.88426	Proteasome subunit beta type	GO:0004298|GO:0005839|GO:0051603	threonine-type endopeptidase activity | proteasome core complex | proteolysis involved in cellular protein catabolic process	35.1	not assigned.annotated	XP_004232431.1
Solyc03g120550	0.777273	8.99696	0.0359793	0.88426	Major facilitator superfamily protein	GO:0005215|GO:0006857|GO:0016020	transporter activity | oligopeptide transport | membrane	24.2.2.9	Solute transport.carrier-mediated transport.MFS superfamily.anion transporter (NRT1/PTR)	XP_025885994.1	AT1G52190.1
Solyc01g109460	2.22619	5.06721	0.0360807	0.884609	Polyol monosaccharide transporter 4	GO:0016021|GO:0022857|GO:0055085	integral component of membrane | transmembrane transporter activity | transmembrane transport	24.2.2.1.7	Solute transport.carrier-mediated transport.MFS superfamily.SP family.polyol/monosaccharide transporter (PLT)	NP_001287655.1
Solyc07g052510	-2.35355	0.0330405	0.0361472	0.884609	peroxidase (TPX1)	GO:0004601|GO:0055114	peroxidase activity | oxidation-reduction process	35.1	not assigned.annotated	NP_001289850.1
Solyc08g065220	-0.646851	7.15568	0.0361435	0.884609	glycine decarboxylase p-protein	GO:0004375|GO:0006546|GO:0055114	glycine dehydrogenase (decarboxylating) activity | glycine catabolic process | oxidation-reduction process	1.3.4.1	Photosynthesis.photorespiration.glycine decarboxylase complex.glycine dehydrogenase component P-protein	XP_004245101.1
Solyc08g077480	0.831688	5.90896	0.0361827	0.884609	senescence-associated family protein (DUF581)			27.3.3	Multi-process regulation.SnRK1-kinase regulatory system.SnRK1-interacting factor (FLZ)	XP_004245848.1
Solyc10g080670	-0.957405	6.85912	0.0361134	0.884609	Transmembrane protein, putative			35.2	not assigned.not annotated	XP_004249300.1
Solyc11g066930	0.946796	4.84521	0.0361634	0.884609	DUF868 family protein (DUF868)			35.2	not assigned.not annotated	XP_004251021.1	AT2G27770.1
Solyc12g014360	-4.19551	-2.71844	0.0361228	0.884609	protein trichome birefringence-like 41			35.1	not assigned.annotated	NP_001297253.1
Solyc10g006640	-2.33854	-1.08996	0.0363393	0.887832	bHLH transcription factor153	GO:0046983	protein dimerization activity	15.5.32	RNA biosynthesis.transcriptional regulation.transcription factor (bHLH)	XP_004248340.1
Solyc01g105240	1.02699	2.81686	0.0363988	0.8879	Ubiquitin carboxyl-terminal hydrolase, putative	GO:0016579|GO:0036459	protein deubiquitination | thiol-dependent ubiquitinyl hydrolase activity	19.2.3.1.1.2	Protein homeostasis.ubiquitin-proteasome system.ubiquitin-fold protein deconjugation.ubiquitin deconjugation.UBP deubiquitinase activities.deubiquitinase (UBP3-4)	XP_004230565.1
Solyc02g038740	1.20661	4.73938	0.0364852	0.8879	3-hydroxy-3-methylglutaryl coenzyme A reductase	GO:0050662	coenzyme binding	9.1.1.3	Secondary metabolism.terpenoids.mevalonate pathway.3-hydroxy-3-methylglutaryl-CoA reductase	NP_001296119.1
Solyc09g075500	0.771365	2.97223	0.0364178	0.8879	DUF789 family protein			35.2	not assigned.not annotated	XP_010326567.1
Solyc09g092280	-3.08005	-2.24797	0.0364072	0.8879	Ph-3 resistance protein	GO:0043531	ADP binding	35.1	not assigned.annotated	XP_025888796.1	AT3G46530.1
Solyc10g018260	-1.32941	1.99209	0.0364434	0.8879	UDP-glucuronate 4-epimerase 4	GO:0005975|GO:0016857	carbohydrate metabolic process | racemase and epimerase activity, acting on carbohydrates and derivatives	3.13.4.1	Carbohydrate metabolism.nucleotide sugar biosynthesis.UDP-D-galacturonic acid biosynthesis.UDP-D-glucuronic acid 4-epimerase	XP_004248561.1	AT4G00110.1
Solyc11g006250	-1.40735	3.51352	0.0364911	0.8879	GDSL-motif lipase/hydrolase family protein 2	GO:0016788	hydrolase activity, acting on ester bonds	21.9.5.2	Cell wall organisation.cutin and suberin.cutin polyester biosynthesis.cutin synthase (CD)	NP_001307298.1
Solyc04g076300	-1.08334	2.69066	0.0365737	0.889305	Mechanosensitive ion channel protein 2, chloroplastic			35.1	not assigned.annotated	XP_025886603.1
Solyc04g017740	4.89556	-1.94424	0.0365998	0.889335	LOW QUALITY:pyridoxal-phosphate-dependent serine hydroxymethyltransferase, putative (DUF632)			35.2	not assigned.not annotated	XP_004230169.1
Solyc07g005480	0.734537	4.86462	0.0366418	0.889752	Formin-like protein			20.2.2.6.2	Cytoskeleton organisation.microfilament network.actin polymerisation.formin actin filament elongation factor activities.group-II formin	XP_004242983.1
Solyc05g009500	-1.81215	1.67897	0.0367342	0.890786	Major facilitator superfamily protein	GO:0005215|GO:0006810|GO:0016020	transporter activity | transport | membrane	11.6.4.1 | 24.2.2.9	Phytohormone action.gibberellin.transport.multi-functional transporter (NPF3.1) | Solute transport.carrier-mediated transport.MFS superfamily.anion transporter (NRT1/PTR)	XP_004238938.1
Solyc06g008890	-4.93745	-2.11951	0.0367327	0.890786	Kinase family protein	GO:0005524	ATP binding	18.4.1.24.2	Protein modification.phosphorylation.TKL protein kinase superfamily.G-Lectin protein kinase families.protein kinase (SD-2)	XP_004240528.1
Solyc09g090730	3.15313	1.5476	0.0367778	0.891239	AMT1	GO:0008519|GO:0016020|GO:0072488	ammonium transmembrane transporter activity | membrane | ammonium transmembrane transport	24.3.4.1	Solute transport.channels.AMT family.ammonium transporter (AMT1)	NP_001304667.1
Solyc11g012240	4.36885	-2.30315	0.036903	0.893668	MBOAT (membrane bound O-acyl transferase) family protein	GO:0008374	O-acyltransferase activity	5.5.2.3.2	Lipid metabolism.phytosterol biosynthesis.phytosterol conjugation.phytosterol esterification.acyl-CoA:cholesterol acyltransferase	XP_010312742.1	AT3G51970.1
Solyc06g054240	1.08356	1.74405	0.0369732	0.894685	5'-nucleotidase surE	GO:0016787	hydrolase activity	35.2	not assigned.not annotated	XP_004241052.1
Solyc12g008350	0.981733	3.90576	0.0369951	0.894685	dehydration responsive element binding protein 2	GO:0003700|GO:0006355	DNA-binding transcription factor activity | regulation of transcription, DNA-templated	15.5.7.2	RNA biosynthesis.transcriptional regulation.AP2/ERF transcription factor superfamily.transcription factor (DREB)	NP_001234759.1
Solyc08g022130	-6.66149	-2.60036	0.0371203	0.897107	F-box-like/WD repeat-containing protein TBL1XR1			35.2	not assigned.not annotated	XP_019070634.1
Solyc01g096260	-1.46335	1.99293	0.0371547	0.897333	NAD-dependent protein deacetylase HST1-like protein			35.2	not assigned.not annotated	XP_004230011.1
Solyc07g005390	-0.84734	4.55973	0.0372325	0.897394	aldehyde dehydrogenase 11A3	GO:0008152|GO:0016491|GO:0055114	metabolic process | oxidoreductase activity | oxidation-reduction process	2.1.1.4.2	Cellular respiration.glycolysis.cytosolic glycolysis.glyceraldehyde 3-phosphate dehydrogenase activities.NADP-dependent glyceraldehyde 3-phosphate dehydrogenase	XP_010323179.1
Solyc08g078207	2.70953	0.465413	0.0372299	0.897394	RING-H2 finger protein ATL22			19.2	Protein homeostasis.ubiquitin-proteasome system	XP_004245797.1
Solyc12g096820	-0.884816	2.58513	0.0372221	0.897394	Glycosyltransferase	GO:0008152|GO:0016758	metabolic process | transferase activity, transferring hexosyl groups	50.2.4	Enzyme classification.EC_2 transferases.EC_2.4 glycosyltransferase	XP_004253028.2	AT1G05680.1
Solyc01g067295	-2.18494	-0.28134	0.037308	0.898609	Metallocarboxypeptidase inhibitor			35.2	not assigned.not annotated	XP_004229220.1
Solyc10g008210	-3.31366	-1.19141	0.0374365	0.901097	Targeting protein for Xklp2	GO:0005819|GO:0005874|GO:0032147|GO:0060236	spindle | microtubule | activation of protein kinase activity | regulation of mitotic spindle organization	13.3.2	Cell cycle organisation.mitosis and meiosis.prospindle assembly factor (TPX2)	XP_010327080.1
Solyc10g009610	2.25149	-1.90974	0.0374659	0.901196	Auxin-responsive GH3 family protein	GO:0009611|GO:0009694|GO:0009864|GO:0080123	response to wounding | jasmonic acid metabolic process | induced systemic resistance, jasmonic acid mediated signaling pathway | jasmonate-amino synthetase activity	11.7.3.2	Phytohormone action.jasmonic acid.conjugation and degradation.jasmonoyl-amino acid synthetase (JAR1)	XP_004248077.1
Solyc06g063330	-1.91096	-1.67121	0.0375352	0.902257	vacuolar ATP synthase subunit A	GO:0046034	ATP metabolic process	24.1.1.2.1	Solute transport.primary active transport.V-type ATPase complex.peripheral V1 subcomplex.subunit A	NP_001234287.2
Solyc04g071490	-3.61008	-2.40674	0.0376124	0.903152	Heat shock family protein			35.2	not assigned.not annotated	XP_004237795.1
Solyc05g055185	-5.62937	-3.33986	0.0376229	0.903152	photosystem I reaction center subunit N			35.2	not assigned.not annotated	XP_004239734.1
Solyc07g040680	-0.99758	4.31568	0.0376863	0.904066	SolycHsfA9	GO:0003700|GO:0005634|GO:0006355|GO:0043565	DNA-binding transcription factor activity | nucleus | regulation of transcription, DNA-templated | sequence-specific DNA binding	15.5.13	RNA biosynthesis.transcriptional regulation.transcription factor (HSF)	XP_004243750.1
Solyc01g068410	-3.76185	-2.52839	0.0378511	0.904612	SlPIN5	GO:0016021|GO:0055085	integral component of membrane | transmembrane transport	11.2.4.1.1 | 24.2.5.2.1	Phytohormone action.auxin.transport.polar auxin transport.auxin transporter (PIN) | Solute transport.carrier-mediated transport.BART superfamily.AEC family.auxin efflux transporter (PIN)	NP_001234192.1
Solyc05g007040	-2.86107	0.0133847	0.0378491	0.904612	LOW QUALITY:Disease resistance protein (TIR-NBS-LRR class) family			11.10.1.5.1	Phytohormone action.signalling peptides.NCRP (non-cysteine-rich-peptide) category.IDL-peptide activity.IDA/IDL-precursor polypeptide	XP_010316465.1
Solyc05g008220	3.46597	2.05328	0.0378608	0.904612	Plastid movement impaired protein			35.1	not assigned.annotated	XP_004238848.1
Solyc06g060340	-2.42046	4.97593	0.0378573	0.904612	photosystem II subunit S			1.1.1.5.1.2.1	Photosynthesis.photophosphorylation.photosystem II.photoprotection.non-photochemical quenching (NPQ).PsbS-dependent machinery.regulatory protein (PsbS)	NP_001296186.1
Solyc09g031920	0.77336	5.44084	0.0378545	0.904612	LOW QUALITY:Late embryogenesis abundant hydroxyproline-rich glycoprotein			35.2	not assigned.not annotated	XP_004246969.1	AT3G54200.1
Solyc10g079690	1.21962	4.41253	0.0378348	0.904612	callose synthase 1			35.2	not assigned.not annotated	XP_019068810.2
Solyc11g015897	2.88611	-2.46533	0.0379269	0.905587	F-box protein			35.2	not assigned.not annotated	XP_025884089.1
Solyc09g011937	4.79059	-3.03718	0.037963	0.905844	Ulp1 protease family protein	GO:0006508|GO:0008234	proteolysis | cysteine-type peptidase activity	35.2	not assigned.not annotated	XP_025885732.1
Solyc05g008020	-3.96132	-2.98657	0.0380335	0.906923	mitogen-activated protein kinase 15	GO:0005524	ATP binding	18.4.3.6	Protein modification.phosphorylation.CMGC protein kinase superfamily.protein kinase (MAPK)	XP_019069306.1
Solyc02g064730	0.601764	9.14316	0.0382005	0.906987	cyclin-dependent kinase B1-2			35.1	not assigned.annotated	XP_004233452.1
Solyc03g006640	0.800736	5.24868	0.0382391	0.906987	F-box family protein	GO:0005515	protein binding	35.1	not assigned.annotated	XP_004234134.1
Solyc03g120730	-0.571564	6.27871	0.0382118	0.906987	Sulfite exporter TauE/SafE family protein	GO:0016021	integral component of membrane	24.2.6.2	Solute transport.carrier-mediated transport.TOC superfamily.transport protein (TSUP)	XP_010318541.1
Solyc06g073165	1.65942	2.21137	0.038133	0.906987	LOW QUALITY:BURP domain-containing protein			35.1	not assigned.annotated	XP_004241419.1
Solyc08g007430	2.54462	-1.94755	0.0382022	0.906987	NIT2	GO:0005215|GO:0006857|GO:0016020	transporter activity | oligopeptide transport | membrane	24.2.2.9	Solute transport.carrier-mediated transport.MFS superfamily.anion transporter (NRT1/PTR)	XP_004244572.1
Solyc09g097960	3.37756	2.10415	0.0381753	0.906987	NAD(P)-linked oxidoreductase superfamily protein			50.1.1	Enzyme classification.EC_1 oxidoreductases.EC_1.1 oxidoreductase acting on CH-OH group of donor	NP_001333054.1
Solyc11g007410	3.17483	-1.19968	0.0381721	0.906987	Receptor-like protein kinase	GO:0030247	polysaccharide binding	35.2	not assigned.not annotated	XP_025883938.1
Solyc12g056780	-0.665211	6.40236	0.0382344	0.906987	HSP20-like chaperones superfamily protein			19.1.6.2	Protein homeostasis.protein quality control.Hsp90 chaperone system.Hsp90-co-chaperone (P23)	XP_004252558.1
Solyc03g098300	6.38255	-2.5412	0.0383014	0.907863	Ornithine decarboxylase 2	GO:0006596	polyamine biosynthetic process	8.1.2.1	Polyamine metabolism.putrescine biosynthesis.cytosolic pathway.ornithine decarboxylase	XP_004235389.1	AT5G11880.1
Solyc01g111270	0.89068	5.43347	0.0384749	0.910767	Armadillo repeat only protein	GO:0005515	protein binding	35.2	not assigned.not annotated	XP_025884648.1
Solyc03g118110	0.668815	7.41578	0.0384589	0.910767	Ankyrin repeat family protein			2.3.6.2.1	Cellular respiration.tricarboxylic acid cycle.succinate dehydrogenase complex.assembly.flavinylation factor (SDHAF2)	XP_004235854.1
Solyc02g078840	0.6269	5.72809	0.0386277	0.911373	Secretory carrier membrane protein	GO:0015031|GO:0016021	protein transport | integral component of membrane	35.1	not assigned.annotated	XP_004232822.1
Solyc04g071160	0.624294	6.10665	0.0386255	0.911373	BZIP transcription factor	GO:0003700|GO:0006355|GO:0043565	DNA-binding transcription factor activity | regulation of transcription, DNA-templated | sequence-specific DNA binding	15.5.4.1	RNA biosynthesis.transcriptional regulation.bZIP transcription factor superfamily.transcription factor (bZIP)	XP_004237777.1
Solyc04g078980	1.32082	0.315523	0.0385319	0.911373	Hexosyltransferase	GO:0016757	transferase activity, transferring glycosyl groups	21.2.2.1.2.1	Cell wall organisation.hemicellulose.xylan.biosynthesis.glucuronosyltransferase activities.glucuronosyltransferase (GUX)	XP_010320334.2
Solyc06g065890	-2.44992	-2.16024	0.0386476	0.911373	LOW QUALITY:Disease resistance protein (TIR-NBS-LRR class) family			35.2	not assigned.not annotated	XP_004232262.1
Solyc08g014050	3.50006	-2.26538	0.0386534	0.911373	Glycosyltransferase	GO:0008152|GO:0016758	metabolic process | transferase activity, transferring hexosyl groups	50.2.4	Enzyme classification.EC_2 transferases.EC_2.4 glycosyltransferase	XP_004244752.1
Solyc09g063010	-0.892007	3.09383	0.0385876	0.911373	bHLH transcription factor 058			35.2	not assigned.not annotated	XP_004247109.1
Solyc00g012430	2.22073	0.150227	0.0387279	0.91239	LOW QUALITY:alpha/beta-Hydrolases superfamily protein			35.2	not assigned.not annotated	NP_001303272.1
Solyc12g008650	-2.36921	-0.105585	0.0387475	0.91239	Myo-inositol oxygenase	GO:0005506|GO:0005737|GO:0019310|GO:0050113|GO:0055114	iron ion binding | cytoplasm | inositol catabolic process | inositol oxygenase activity | oxidation-reduction process	3.13.3.2.3	Carbohydrate metabolism.nucleotide sugar biosynthesis.UDP-D-glucuronic acid biosynthesis.myo-inositol oxidation pathway (MIOP).myo-inositol oxygenase	NP_001234593.1
Solyc01g099250	-2.59823	-2.09137	0.0388194	0.912991	Leucine-rich repeat receptor-like protein kinase family protein	GO:0005515	protein binding	35.1	not assigned.annotated	XP_025884784.1
Solyc03g083130	-1.14316	1.45044	0.0388496	0.912991	gamma-irradiation and mitomycin c induced 1			35.1	not assigned.annotated	XP_019068467.1
Solyc10g007070	0.953248	2.9516	0.0388278	0.912991	Early nodulin-like protein	GO:0009055	electron transfer activity	35.1	not assigned.annotated	XP_004248258.1
Solyc02g084130	2.56609	0.870087	0.0389276	0.913373	uridine kinase-like 5			6.2.1	Nucleotide metabolism.pyrimidines.de novo biosynthesis	XP_010316420.1
Solyc03g112100	2.32844	1.0704	0.038904	0.913373	high-affinity nitrate transporter-like protein	GO:0010167|GO:0015706	response to nitrate | nitrate transport	25.1.3.2	Nutrient uptake.nitrogen assimilation.nitrate uptake system.regulatory factor (NRT3)	XP_010319027.1
Solyc06g066000	-0.578809	6.25073	0.0389425	0.913373	ATP synthase subunit b	GO:0015078|GO:0015986|GO:0045263	proton transmembrane transporter activity | ATP synthesis coupled proton transport | proton-transporting ATP synthase complex, coupling factor F(o)	1.1.9.1.3	Photosynthesis.photophosphorylation.ATP synthase complex.membrane CF0 subcomplex.subunit b_	XP_019069909.1
Solyc04g071825	-2.08395	-1.55779	0.0390807	0.916015	Cytochrome P450 family protein	GO:0005506|GO:0016705|GO:0020037|GO:0055114	iron ion binding | oxidoreductase activity, acting on paired donors, with incorporation or reduction of molecular oxygen | heme binding | oxidation-reduction process	50.1.13	Enzyme classification.EC_1 oxidoreductases.EC_1.14 oxidoreductase acting on paired donor with incorporation or reduction of molecular oxygen	XP_004237819.1
Solyc01g094725	-2.76771	-1.94971	0.039112	0.916147	Ulp1 protease family, C-terminal catalytic domain containing protein			35.2	not assigned.not annotated	XP_025887738.1
Solyc04g010330	2.10988	-0.0495642	0.0392408	0.918564	Auxin-regulated protein			35.1	not assigned.annotated	XP_004236760.1
Solyc01g008910	0.916585	3.49617	0.039579	0.918664	Scarecrow-like transcription factor 3 family protein	GO:0000989|GO:0005634	obsolete transcription factor activity, transcription factor binding | nucleus	15.5.12	RNA biosynthesis.transcriptional regulation.transcription factor (GRAS)	XP_004228489.1	AT1G50420.1
Solyc01g101190	5.70556	2.57077	0.039509	0.918664	Alpha-humulene/(-)-(E)-beta-caryophyllene synthase (AHRD V1 **** HUMS_ARATH)%3B contains Interpro domain(s) IPR005630	GO:0008152|GO:0010333|GO:0016829	metabolic process | terpene synthase activity | lyase activity	9.1.4.2	Secondary metabolism.terpenoids.terpene biosynthesis.mono-/sesquiterpene-/diterpene synthase	NP_001308054.1
Solyc01g104060	-0.792558	3.4211	0.0395678	0.918664	Aminomethyltransferase	GO:0005515	protein binding	7.11.1.2.4	Coenzyme metabolism.iron-sulfur cluster assembly machinery.plastidial SUF system.transfer phase.assembly factor (IBA57)	XP_004230488.2
Solyc01g111250	0.779881	6.52697	0.0394047	0.918664	1-phosphatidylinositol phosphodiesterase-related family protein	GO:0006629|GO:0008081	lipid metabolic process | phosphoric diester hydrolase activity	35.2	not assigned.not annotated	XP_019067477.1
Solyc02g080130	0.532696	7.01579	0.0393296	0.918664	DnaJ			19.1.1.2.4	Protein homeostasis.protein quality control.ER Quality Control (ERQC) machinery.BiP chaperone system.co-chaperone (ERdj7)	XP_004232745.1
Solyc02g083730	5.64904	-2.71313	0.0395431	0.918664	Rhodanese-related sulfurtransferase			35.1	not assigned.annotated	XP_010316426.1
Solyc03g095870	-1.48342	3.33599	0.0394981	0.918664	Eukaryotic translation initiation factor 2 subunit alpha			35.2	not assigned.not annotated	NP_001311386.1
Solyc07g005190	-3.53146	-1.91415	0.0393075	0.918664	Lysosomal Pro-X carboxypeptidase	GO:0006508|GO:0008236	proteolysis | serine-type peptidase activity	19.4.2.7	Protein homeostasis.proteolysis.serine-type peptidase activities.S28-class serine carboxypeptidase	XP_004242567.1
Solyc07g054170	-2.71779	-2.69175	0.0394314	0.918664	expansin B3	GO:0005576|GO:0019953	extracellular region | sexual reproduction	21.4.2.3	Cell wall organisation.cell wall proteins.expansin activities.beta-class expansin	XP_004243343.1
Solyc07g061790	-1.32484	5.21896	0.0393504	0.918664	SOUL heme-binding family protein			35.2	not assigned.not annotated	XP_004244318.1
Solyc09g008270	-1.49616	1.00903	0.039554	0.918664	translation initiation factor	GO:0016020|GO:0022904	membrane | respiratory electron transport chain	35.2	not assigned.not annotated	XP_004246621.1
Solyc11g019910	-2.41708	-0.385192	0.039505	0.918664	LOW QUALITY:Plant invertase/pectin methylesterase inhibitor	GO:0004857	enzyme inhibitor activity	35.1	not assigned.annotated	XP_004250403.1	AT4G25250.1
Solyc12g013730	3.43558	-1.51049	0.0392913	0.918664	Leucine-rich repeat receptor-like protein kinase family protein	GO:0005515	protein binding	35.1	not assigned.annotated	XP_010313802.1
Solyc02g083030	-2.83771	-2.16194	0.0396828	0.919879	LOW QUALITY:DUF241 domain protein			35.2	not assigned.not annotated	XP_010316455.1	AT4G35690.1
Solyc09g082780	-0.628135	6.91829	0.0396758	0.919879	Stem-specific protein TSJT1			35.1	not assigned.annotated	XP_004247611.1
Solyc01g081480	-1.12267	1.21047	0.0397956	0.920836	alpha/beta-Hydrolases superfamily protein	GO:0016788	hydrolase activity, acting on ester bonds	35.1	not assigned.annotated	XP_004229542.1
Solyc06g068190	-1.04147	0.955572	0.0398013	0.920836	Ubiquitin system component Cue protein, putative			35.2	not assigned.not annotated	XP_004235950.1
Solyc06g084110	1.84648	-1.1524	0.0397935	0.920836	kinase superfamily protein	GO:0004722|GO:0006470	protein serine/threonine phosphatase activity | protein dephosphorylation	35.2	not assigned.not annotated	XP_019069733.1	AT3G63340.2
Solyc11g043010	-3.78198	-2.69426	0.0399062	0.922667	Translocase of chloroplast 120	GO:0005525	GTP binding	23.1.2.2	Protein translocation.chloroplast.outer envelope TOC translocation system.receptor GTPase (Toc90|Toc120|Toc132|Toc159)	XP_010315364.1	AT2G16640.1
Solyc03g071540	1.76524	0.00835003	0.0399508	0.922721	LOW QUALITY:Maturase K			35.2	not assigned.not annotated	XP_004234000.1
Solyc04g079190	1.10341	3.60952	0.0399602	0.922721	alpha/beta-Hydrolases superfamily protein	GO:0008152|GO:0016787	metabolic process | hydrolase activity	35.1	not assigned.annotated	XP_004238173.1
Solyc01g098990	-0.646782	5.07667	0.0400278	0.92309	DUF1995 domain protein, putative (DUF1995)			35.1	not assigned.annotated	XP_004230190.1
Solyc03g083147	-0.741846	3.10277	0.040007	0.92309	Defective in meristem silencing 3			35.1	not assigned.annotated	XP_025885714.1
Solyc10g083165	0.651996	6.66651	0.0401432	0.924559	40S ribosomal protein S17	GO:0003735|GO:0005622|GO:0005840|GO:0006412	structural constituent of ribosome | intracellular | ribosome | translation	17.1.3.1.19	Protein biosynthesis.ribosome biogenesis.small ribosomal subunit (SSU).SSU proteome.component RPS17	XP_004249419.1
Solyc12g005020	-1.88693	3.16221	0.0401396	0.924559	RING/U-box superfamily protein	GO:0005515|GO:0008270	protein binding | zinc ion binding	19.2.2.1.5.3.3	Protein homeostasis.ubiquitin-proteasome system.ubiquitin-fold protein conjugation.ubiquitin conjugation (ubiquitylation).ubiquitin-ligase E3 activities.RING-domain E3 ligase activities.RING-H2-class E3 ligase	XP_004251461.1
Solyc02g062340	-1.61022	5.64693	0.0402345	0.92547	Fructose-bisphosphate aldolase	GO:0004332|GO:0006096	fructose-bisphosphate aldolase activity | glycolytic process	1.2.5 | 3.12.2	Photosynthesis.calvin cycle.fructose 1,6-bisphosphate aldolase | Carbohydrate metabolism.plastidial glycolysis.fructose-1,6-bisphosphate aldolase	NP_001333905.1
Solyc04g014560	0.617214	5.32299	0.040217	0.92547	Pre-mRNA splicing factor PRP38 family protein			35.1	not assigned.annotated	XP_004236682.1
Solyc00g013180	2.99835	-2.83542	0.040301	0.92581	NADH-ubiquinone oxidoreductase chain 4	GO:0008137|GO:0042773|GO:0055114	NADH dehydrogenase (ubiquinone) activity | ATP synthesis coupled electron transport | oxidation-reduction process	35.1	not assigned.annotated	YP_009430470.1	ATMG00580.1
Solyc08g005640	-5.10011	-2.61241	0.0402784	0.92581	Terpene synthase	GO:0008152|GO:0010333|GO:0016829	metabolic process | terpene synthase activity | lyase activity	9.1.4.2 | 11.6.1.2	Secondary metabolism.terpenoids.terpene biosynthesis.mono-/sesquiterpene-/diterpene synthase | Phytohormone action.gibberellin.biosynthesis.ent-kaurene synthase	XP_025888303.1
Solyc11g012190	-0.840709	3.33217	0.0403588	0.926544	Mannan endo-1,4-beta-mannosidase 1	GO:0005975	carbohydrate metabolic process	21.2.3.2.2	Cell wall organisation.hemicellulose.heteromannan.modification and degradation.endo-beta-1,4-mannanase	XP_004250262.1
Solyc01g057680	2.4696	0.441378	0.0404619	0.927837	Leucine-rich receptor-like protein kinase family protein			35.2	not assigned.not annotated	XP_004252390.2
Solyc03g116700	2.32868	4.63924	0.0405189	0.927837	Blue copper protein	GO:0009055	electron transfer activity	35.1	not assigned.annotated	XP_004235961.1
Solyc03g118720	0.6395	5.14276	0.0404976	0.927837	C2-domain ABA-related family protein	GO:0005515	protein binding	11.1.2.1.2	Phytohormone action.abscisic acid.perception and signalling.PYR/PYL-receptor.recruitment factor (CAR)	NP_001316020.1
Solyc08g005790	4.43527	-0.612398	0.0404804	0.927837	Pectinacetylesterase family protein	GO:0016787	hydrolase activity	21.3.5.4	Cell wall organisation.pectin.modification and degradation.pectin acetylesterase	XP_004244682.2
Solyc10g080460	3.94328	0.428927	0.0405533	0.92803	Myb family transcription factor family protein	GO:0003677	DNA binding	15.5.2.3	RNA biosynthesis.transcriptional regulation.MYB transcription factor superfamily.transcription factor (GARP)	XP_004249281.1
Solyc02g091560	-1.36152	7.14946	0.0405836	0.928129	Serine hydroxymethyltransferase	GO:0016740	transferase activity	1.3.5	Photosynthesis.photorespiration.serine hydroxymethyltransferase (SHM)	XP_010316057.1
Solyc00g022107	2.81073	-2.03865	0.0409906	0.928674	Ribosomal protein L2	GO:0003735|GO:0005622|GO:0005840|GO:0006412	structural constituent of ribosome | intracellular | ribosome | translation	17.7.1.1.2	Protein biosynthesis.organelle machinery.mitochondrial ribosome.large ribosomal subunit proteome.component mtRPL2-N-terminal	YP_009430476.1
Solyc01g060220	5.70113	-2.48429	0.040844	0.928674	Cleavage and polyadenylation specificity factor subunit 1			35.2	not assigned.not annotated	XP_004229928.1
Solyc01g090810	5.98632	-0.54036	0.0408996	0.928674	beta-expansin precursor	GO:0005576|GO:0019953	extracellular region | sexual reproduction	35.1	not assigned.annotated	NP_001234859.2
Solyc01g096400	-1.08813	1.68322	0.0408143	0.928674	Transglutaminase family protein			35.2	not assigned.not annotated	XP_004230025.1
Solyc01g108880	-0.880101	6.71085	0.0409135	0.928674	2-oxoglutarate (2OG) and Fe(II)-dependent oxygenase superfamily protein	GO:0016491|GO:0055114	oxidoreductase activity | oxidation-reduction process	50.1.13	Enzyme classification.EC_1 oxidoreductases.EC_1.14 oxidoreductase acting on paired donor with incorporation or reduction of molecular oxygen	XP_004230829.1
Solyc02g087230	-0.60694	5.82149	0.0407251	0.928674	Ferredoxin-thioredoxin reductase catalytic chain	GO:0016730|GO:0055114	oxidoreductase activity, acting on iron-sulfur proteins as donors | oxidation-reduction process	10.5.1.2	Redox homeostasis.chloroplast redox homeostasis.ferredoxin-dependent thioredoxin reductase (FTR) complex.subunit beta	XP_004232269.1
Solyc03g006385	1.48167	-0.0693157	0.0410124	0.928674	Leucine-rich repeat protein kinase family protein			35.2	not assigned.not annotated	NP_001234393.1
Solyc04g011990	3.86035	-2.98984	0.0409764	0.928674	Disease resistance protein (NBS-LRR class) family	GO:0043531	ADP binding	35.1	not assigned.annotated	XP_019068848.2
Solyc06g048420	-3.32939	-2.45665	0.0408934	0.928674	Superoxide dismutase	GO:0004784|GO:0006801|GO:0046872|GO:0055114	superoxide dismutase activity | superoxide metabolic process | metal ion binding | oxidation-reduction process	10.2.2.1	Redox homeostasis.enzymatic reactive oxygen species scavengers.superoxide dismutase activities.iron superoxide dismutase	NP_001300698.1
Solyc06g082970	-1.55574	1.8493	0.0409488	0.928674	Chaperone DnaJ-domain superfamily protein			1.1.8.1.5.3	Photosynthesis.photophosphorylation.chlororespiration.NADH dehydrogenase-like (NDH) complex.electron donor-binding subcomplex E.component NdhU	XP_004242446.1
Solyc09g007765	-2.93211	-2.46846	0.0406515	0.928674	Aquaporin-like protein	GO:0005215|GO:0006810|GO:0016020	transporter activity | transport | membrane	24.3.1.2	Solute transport.channels.MIP family.plasma membrane intrinsic protein (PIP)	NP_001289823.1
Solyc09g061930	1.16052	2.45159	0.0409216	0.928674	Ovary receptor kinase 7	GO:0005515	protein binding	18.4.1.3	Protein modification.phosphorylation.TKL protein kinase superfamily.protein kinase (LRR-III)	XP_004247106.2
Solyc09g090600	-5.73105	-2.85886	0.0407489	0.928674	Acid phosphatase 1	GO:0003993	acid phosphatase activity	35.1	not assigned.annotated	XP_004247765.1
Solyc10g039270	-0.693508	3.99457	0.0409785	0.928674	Peptidyl-prolyl cis-trans isomerase			18.12.2	Protein modification.protein folding.protein folding catalyst (FKBP)	XP_004248526.1
Solyc11g006310	5.09008	0.893382	0.0407769	0.928674	Gamete expressed protein 1, putative			35.1	not assigned.annotated	XP_004250460.2
Solyc12g089000	0.754282	6.54886	0.0410228	0.928674	RING/U-box superfamily protein	GO:0005515|GO:0008270	protein binding | zinc ion binding	19.2.2.1.5.4.1	Protein homeostasis.ubiquitin-proteasome system.ubiquitin-fold protein conjugation.ubiquitin conjugation (ubiquitylation).ubiquitin-ligase E3 activities.RBR-type E3 ligase activities.E3 ubiquitin ligase (RBR-Ariadne)	XP_004252781.1
Solyc06g082750	-0.836004	3.45799	0.0410793	0.929365	50S ribosomal protein L17	GO:0003735|GO:0005622|GO:0005840|GO:0006412	structural constituent of ribosome | intracellular | ribosome | translation	17.7.2.1.15	Protein biosynthesis.organelle machinery.plastidial ribosome.large ribosomal subunit proteome.component psRPL17	XP_004242470.1
Solyc01g105650	2.57026	-0.29597	0.041215	0.930081	2-oxoglutarate and Fe(II)-dependent oxygenase superfamily protein, putative	GO:0016491|GO:0055114	oxidoreductase activity | oxidation-reduction process	50.1.13	Enzyme classification.EC_1 oxidoreductases.EC_1.14 oxidoreductase acting on paired donor with incorporation or reduction of molecular oxygen	XP_004230628.1
Solyc05g011920	0.77032	3.03142	0.0411404	0.930081	ACT domain-containing protein	GO:0008152|GO:0016597	metabolic process | amino acid binding	35.1	not assigned.annotated	XP_004239021.1
Solyc12g019010	-0.695767	4.80877	0.0412149	0.930081	2-phytyl-1,4-beta-naphthoquinone methyltransferase, chloroplastic	GO:0042372|GO:0052624	phylloquinone biosynthetic process | 2-phytyl-1,4-naphthoquinone methyltransferase activity	7.13.7	Coenzyme metabolism.phylloquinone biosynthesis.2-phytyl-1,4-naphthoquinone methyltransferase	XP_004251986.1
Solyc12g062800	-1.70775	-0.809553	0.0411845	0.930081	SCAR family protein			35.2	not assigned.not annotated	XP_010325940.1
Solyc10g009640	3.69347	-2.33073	0.0412587	0.930481	Auxin-responsive GH3 family protein	GO:0009611|GO:0009694|GO:0009864|GO:0080123	response to wounding | jasmonic acid metabolic process | induced systemic resistance, jasmonic acid mediated signaling pathway | jasmonate-amino synthetase activity	11.7.3.2	Phytohormone action.jasmonic acid.conjugation and degradation.jasmonoyl-amino acid synthetase (JAR1)	XP_004248076.1
Solyc02g061770	2.78052	2.06981	0.0413478	0.931901	chitinase 2	GO:0004568|GO:0006032|GO:0016998	chitinase activity | chitin catabolic process | cell wall macromolecule catabolic process	35.1	not assigned.annotated	NP_001266258.1
Solyc01g009990	-0.628106	7.13088	0.0415947	0.933128	Peptidyl-prolyl cis-trans isomerase	GO:0003755|GO:0006457	peptidyl-prolyl cis-trans isomerase activity | protein folding	1.1.8.1.4.5 | 18.12.1	Photosynthesis.photophosphorylation.chlororespiration.NADH dehydrogenase-like (NDH) complex.lumen subcomplex L.component PnsL5 | Protein modification.protein folding.protein folding catalyst (Cyclophilin)	XP_004228428.1
Solyc04g005020	1.60352	2.25506	0.041637	0.933128	Transducin/WD40 repeat-like superfamily protein	GO:0005515	protein binding	35.1	not assigned.annotated	XP_004237083.1
Solyc05g044490	5.48632	-2.15772	0.0416017	0.933128	NBS-LRR resistance protein-like protein	GO:0043531	ADP binding	35.1	not assigned.annotated	XP_019069333.1	AT5G35450.1
Solyc07g055860	0.544592	6.87171	0.0414408	0.933128	type 5 protein serine/threonine phosphatase 62 kDa isoform	GO:0016787	hydrolase activity	18.4.24.1.4	Protein modification.phosphorylation.serine/threonine protein phosphatase superfamily.PPP Fe-Zn-dependent phosphatase families.PP5-class phosphatase	NP_001300937.1
Solyc08g079910	3.00307	-1.99889	0.0415039	0.933128	P69e protein	GO:0004252|GO:0006508	serine-type endopeptidase activity | proteolysis	35.1	not assigned.annotated	XP_019070631.1
Solyc10g008780	-5.36433	-3.43665	0.0414873	0.933128	LOW QUALITY:TCP transcription factor 30			15.5.19	RNA biosynthesis.transcriptional regulation.transcription factor (TCP)	NP_001233783.1	AT2G31070.1
Solyc10g018120	1.11853	3.28569	0.0415374	0.933128	neuronal PAS domain protein			35.2	not assigned.not annotated	XP_004248565.1
Solyc11g011875	-6.03602	-3.0888	0.0415883	0.933128	Protein kinase	GO:0004672|GO:0006468	protein kinase activity | protein phosphorylation	50.2.7	Enzyme classification.EC_2 transferases.EC_2.7 transferase transferring phosphorus-containing group	XP_004250234.1
Solyc11g021060	-3.77396	-0.550303	0.0416217	0.933128	TOMARPIX proteinase inhibitor	GO:0004867	serine-type endopeptidase inhibitor activity	35.1	not assigned.annotated	NP_001234661.1
Solyc05g025680	1.30844	3.16123	0.0416674	0.933225	Respiratory burst oxidase, putative	GO:0016491|GO:0055114	oxidoreductase activity | oxidation-reduction process	10.1.1	Redox homeostasis.reactive oxygen generation.NADPH-oxidase (Rboh)	XP_004239582.1
Solyc01g105940	3.48887	-1.69313	0.041785	0.935274	Linalool synthase	GO:0000287|GO:0010333|GO:0016829	magnesium ion binding | terpene synthase activity | lyase activity	9.1.4.2	Secondary metabolism.terpenoids.terpene biosynthesis.mono-/sesquiterpene-/diterpene synthase	NP_001233805.1
Solyc06g076820	-0.817745	5.25501	0.0418972	0.935926	Zinc finger (C2H2 type) family protein	GO:0046872	metal ion binding	15.5.15	RNA biosynthesis.transcriptional regulation.transcription factor (C2H2-ZF)	XP_004241174.1	AT2G29660.1
Solyc09g009720	0.740084	5.11418	0.041868	0.935926	ubiquitin-conjugating enzyme E2			19.2.2.1.6.1.1 | 19.2.4.1.2	Protein homeostasis.ubiquitin-proteasome system.ubiquitin-fold protein conjugation.ubiquitin conjugation (ubiquitylation).polyubiquitination.Ubc13-Uev1 conjugating E2 complex.component Ubc13 | Protein homeostasis.ubiquitin-proteasome system.ER-associated protein degradation (ERAD).HRD1 E3 ubiquitin ligase complex.E2 ubiquitin-conjugating component Ubc7/13/14	XP_004246522.1	AT5G59300.1
Solyc11g064850	0.67983	6.8871	0.0418827	0.935926	Hyp O-arabinosyltransferase-like protein			18.1.2.1.1	Protein modification.glycosylation.O-linked glycosylation.hydroxyproline O-linked glycosylation.hydroxyproline-O-arabinosyltransferase (HPAT)	XP_004250892.1
Solyc12g006700	0.610105	6.49165	0.0419189	0.935926	Mitogen-activated protein kinase kinase kinase 1 isoform 1			35.2	not assigned.not annotated	XP_025884478.1
Solyc06g051010	0.943869	3.50379	0.0420074	0.937318	LOW QUALITY:Peptide-N4-(N-acetyl-beta-glucosaminyl)asparagine amidase A protein			35.1	not assigned.annotated	XP_004241112.1	AT5G05480.1
Solyc05g023840	5.26964	-3.27381	0.0420633	0.93798	LOW QUALITY:Zinc ion binding,transcription regulators, putative	GO:0006352|GO:0006355|GO:0008270	DNA-templated transcription, initiation | regulation of transcription, DNA-templated | zinc ion binding	35.1	not assigned.annotated	XP_004234093.1	AT4G35540.1
Solyc05g008820	1.36646	3.61018	0.0420972	0.93815	Lipid phosphate phosphatase-like protein			5.2.2.1	Lipid metabolism.glycerolipid biosynthesis.diacylglycerol.phosphatidate phosphatase (LPP-alpha)	XP_010320737.1
Solyc09g065180	-0.873513	4.11788	0.0421627	0.939025	binding protein precursor AF106660	GO:0003824|GO:0050662	catalytic activity | coenzyme binding	16.12.1.5	RNA processing.organelle machinery.ribonuclease activities.endoribonuclease (CSP41)	NP_001234656.2
Solyc06g010100	4.97284	-2.43837	0.0422622	0.939486	P-loop containing nucleoside triphosphate hydrolases superfamily protein, putative	GO:0008270	zinc ion binding	19.2.2.2.4.1	Protein homeostasis.ubiquitin-proteasome system.ubiquitin-fold protein conjugation.SUMO conjugation (sumoylation).SUMO E3 ligase activities.E3 ligase (SIZ1)	XP_010317671.1
Solyc09g082200	-0.637711	4.46585	0.0422576	0.939486	Major facilitator superfamily protein	GO:0006810|GO:0016021	transport | integral component of membrane	24.2.2.5	Solute transport.carrier-mediated transport.MFS superfamily.small solute transporter (BT1)	XP_010326673.1	AT2G32040.1
Solyc09g091970	-2.02944	0.860201	0.0422412	0.939486	NAD(P)-binding Rossmann-fold superfamily protein	GO:0003824|GO:0050662	catalytic activity | coenzyme binding	13.6.1.5	Cell cycle organisation.organelle division.plastid division.regulatory protein (GC1/SulA)	XP_004247861.1
Solyc03g120980	-1.0119	4.9568	0.0424428	0.942916	Pleiotropic drug resistance ABC transporter	GO:0016020	membrane	24.1.3.2.2	Solute transport.primary active transport.ABC superfamily.ABC2 family.subfamily ABCG transporter	XP_004235646.1
Solyc07g049670	1.44331	3.68175	0.0425296	0.943671	Benzyl alcohol O-benzoyltransferase	GO:0016747	transferase activity, transferring acyl groups other than amino-acyl groups	50.2.3	Enzyme classification.EC_2 transferases.EC_2.3 acyltransferase	XP_004243495.1
Solyc12g005880	0.624508	4.39739	0.0425185	0.943671	Hexosyltransferase	GO:0006486|GO:0008378|GO:0016020	protein glycosylation | galactosyltransferase activity | membrane	21.4.1.1.5.3	Cell wall organisation.cell wall proteins.hydroxyproline-rich glycoprotein activities.arabinogalactan-protein (AGP) activities.AGP glycosylation.AGP beta-1,3-galactosyltransferase	XP_010313672.1
Solyc02g014850	-5.82751	-3.26575	0.0427282	0.94749	LOW QUALITY:synaptosomal-associated protein SNAP25-like 29			35.2	not assigned.not annotated
Solyc07g005380	6.07442	2.89149	0.0427659	0.947739	Pathogenesis-related (PR)-10-related norcoclaurine synthase-like protein	GO:0006952|GO:0009607	defense response | response to biotic stimulus	35.1	not assigned.annotated	XP_004242575.1
Solyc01g017600	4.6697	-1.78734	0.0429705	0.950623	Transmembrane protein 45B			35.2	not assigned.not annotated	XP_004228340.1
Solyc03g094020	2.41687	-0.539759	0.0429758	0.950623	Alpha-glucosidase-like	GO:0004553|GO:0005975	hydrolase activity, hydrolyzing O-glycosyl compounds | carbohydrate metabolic process	35.1	not assigned.annotated	XP_004235201.1
Solyc10g031560	-3.76199	-2.55904	0.0429358	0.950623	LOW QUALITY:DNA-directed RNA polymerase subunit	GO:0003677|GO:0003899|GO:0006351	DNA binding | DNA-directed 5'-3' RNA polymerase activity | transcription, DNA-templated	35.1	not assigned.annotated	YP_008563079.1	ATCG00180.1
Solyc09g031580	0.600292	5.18181	0.043041	0.951477	RING/FYVE/PHD zinc finger protein	GO:0008080	N-acetyltransferase activity	15.5.30	RNA biosynthesis.transcriptional regulation.transcription factor (PHD)	XP_019071236.1
Solyc04g055000	-1.27027	3.34295	0.0431102	0.952418	tetratricopeptide repeat (TPR)-containing protein	GO:0005515	protein binding	35.1	not assigned.annotated	XP_004237401.1
Solyc01g009245	-1.4319	1.75047	0.0434455	0.95675	Chlororespiratory reduction 42			1.1.8.1.6.9	Photosynthesis.photophosphorylation.chlororespiration.NADH dehydrogenase-like (NDH) complex.assembly and stabilization.assembly factor (CRR42)	XP_004228466.1
Solyc03g098010	-1.87786	2.38979	0.043389	0.95675	phosphate starvation inducible gene TPSI1	GO:0016787	hydrolase activity	35.1	not assigned.annotated	XP_004235369.1
Solyc03g116920	-2.77063	-1.49217	0.0435738	0.95675	Sister chromatid cohesion protein PDS5 like B-B	GO:0005488	binding	13.3.5.3.2	Cell cycle organisation.mitosis and meiosis.sister chromatid separation.cohesin establishment.cohesin cofactor (PDS5)	XP_010318745.1
Solyc03g116990	1.09093	2.29205	0.0434359	0.95675	Protein transport protein Sec61 subunit beta, putative	GO:0005784|GO:0006886	Sec61 translocon complex | intracellular protein transport	23.3.1.3.2	Protein translocation.endoplasmic reticulum.co-translational insertion system.Sec61 subcomplex.subunit beta	XP_004235938.1	AT5G60460.1
Solyc06g054640	-2.06862	2.03192	0.0434487	0.95675	DUF506 family protein			35.2	not assigned.not annotated	XP_019069776.1
Solyc08g016080	-0.598286	5.58857	0.043572	0.95675	high chlorophyll fluorescence phenotype 173			1.1.1.3.24	Photosynthesis.photophosphorylation.photosystem II.assembly and maintenance.psbA-translation activator (HCF173)	XP_004244793.1
Solyc08g066550	-4.02521	-2.7807	0.0435702	0.95675	RING/U-box superfamily protein	GO:0008270	zinc ion binding	35.2	not assigned.not annotated	XP_004245161.1
Solyc08g074930	4.77795	-2.27931	0.0435027	0.95675	Eukaryotic aspartyl protease family protein, putative	GO:0004190|GO:0006508	aspartic-type endopeptidase activity | proteolysis	19.4.3.1	Protein homeostasis.proteolysis.aspartic-type peptidase activities.A1-class protease (Pepsin)	XP_010325639.1	AT5G33340.1
Solyc09g005700	-0.566242	6.44117	0.0433419	0.95675	diaminopimelate epimerase family protein	GO:0008837|GO:0009089	diaminopimelate epimerase activity | lysine biosynthetic process via diaminopimelate	4.1.2.2.3.4	Amino acid metabolism.biosynthesis.aspartate family.aspartate-derived amino acids.lysine.diaminopimelate epimerase	XP_004246745.1
Solyc09g014720	5.01635	-3.46689	0.0434875	0.95675	Kinase, putative	GO:0030247	polysaccharide binding	18.4.1.25	Protein modification.phosphorylation.TKL protein kinase superfamily.protein kinase (WAK/WAKL)	XP_004246830.2
Solyc11g008980	-0.753788	4.78109	0.0436245	0.957277	Protein TIC 20-II, chloroplastic			35.1	not assigned.annotated	XP_004250099.1	AT2G47840.1
Solyc03g078300	0.796053	3.88594	0.0436938	0.957417	Disease resistance protein	GO:0043531	ADP binding	35.1	not assigned.annotated	XP_025885694.1
Solyc07g007350	-0.973521	2.99867	0.043697	0.957417	LOW QUALITY:sterile alpha motif (SAM) domain protein	GO:0005515	protein binding	35.2	not assigned.not annotated	XP_004243024.1	AT2G12462.1
Solyc11g005530	-5.37222	-3.43599	0.0437112	0.957417	Agenet domain-containing protein / bromo-adjacent domain-containing protein, putative			11.10.2.5.1 | 13.7.1.3	Phytohormone action.signalling peptides.CRP (cysteine-rich-peptide) category.EC1-peptide activity.EC1-precursor polypeptide | Cell cycle organisation.membrane organisation.plasma membrane fusion.gamete interaction factor (EC1)	XP_019066528.1
Solyc03g025100	-5.1398	-3.31471	0.0437691	0.958098	Peroxidase superfamily protein			35.2	not assigned.not annotated	XP_010327414.1
Solyc01g014245	0.926578	3.24822	0.0438167	0.958553	Protein kinase superfamily protein			35.2	not assigned.not annotated	XP_010324382.1
Solyc11g066010	-2.56697	-0.304008	0.0438769	0.959284	ATP synthase subunit epsilon			35.2	not assigned.not annotated	XP_004250956.1
Solyc04g005440	2.61439	-1.13658	0.0439588	0.960255	LOW QUALITY:Zinc finger family protein	GO:0046872	metal ion binding	15.5.15	RNA biosynthesis.transcriptional regulation.transcription factor (C2H2-ZF)	XP_004237053.1	AT1G26610.1
Solyc12g056160	1.3557	0.336423	0.043975	0.960255	Cation/H() antiporter	GO:0006812|GO:0015299|GO:0016021|GO:0055085	cation transport | solute:proton antiporter activity | integral component of membrane | transmembrane transport	24.2.8.2.1	Solute transport.carrier-mediated transport.CPA superfamily.CPA-2 family.proton:monovalent cation antiporter (CHX)	XP_010314495.1
Solyc01g106330	-1.19411	4.34071	0.0440112	0.96046	fatty acid amide hydrolase	GO:0004040	amidase activity	35.1	not assigned.annotated	XP_004230539.1
Solyc10g082030	-0.60293	6.91065	0.0440898	0.961589	2-Cys peroxiredoxin 1	GO:0051920|GO:0055114	peroxiredoxin activity | oxidation-reduction process	10.5.3.1	Redox homeostasis.chloroplast redox homeostasis.2-Cys peroxiredoxin activities.typical 2-Cys peroxiredoxin (2-CysPrx)	NP_001315984.1
Solyc02g071610	-1.48654	3.34382	0.0445244	0.963612	GDSL-lipase protein	GO:0016788	hydrolase activity, acting on ester bonds	35.1	not assigned.annotated	XP_004232990.1
Solyc03g097650	-1.28598	2.5282	0.0442409	0.963612	NAC domain protein	GO:0003677|GO:0006355	DNA binding | regulation of transcription, DNA-templated	15.5.17	RNA biosynthesis.transcriptional regulation.transcription factor (NAC)	XP_004235471.1
Solyc03g122350	1.28789	8.07548	0.0445524	0.963612	Cytochrome P450	GO:0016705|GO:0055114	oxidoreductase activity, acting on paired donors, with incorporation or reduction of molecular oxygen | oxidation-reduction process	50.1.13	Enzyme classification.EC_1 oxidoreductases.EC_1.14 oxidoreductase acting on paired donor with incorporation or reduction of molecular oxygen	XP_004235548.1
Solyc04g005090	-0.978196	2.54369	0.0443877	0.963612	cofactor assembly of complex C			1.1.2.9.1.4	Photosynthesis.photophosphorylation.cytochrome b6/f complex.assembly.CCB cytochrome b6 maturation system (system IV).assembly factor (CCB4)	XP_004237074.1
Solyc04g074840	-2.25105	9.28981	0.0443759	0.963612	Protein DETOXIFICATION	GO:0006855|GO:0015238|GO:0015297|GO:0016020|GO:0055085	drug transmembrane transport | antiporter activity | membrane | transmembrane transport	24.2.4.1.1	Solute transport.carrier-mediated transport.MOP superfamily.MATE family.metabolite transporter (DTX)	XP_004237959.1
Solyc04g078290	2.30613	3.5768	0.0445053	0.963612	Cytochrome P450	GO:0016705|GO:0055114	oxidoreductase activity, acting on paired donors, with incorporation or reduction of molecular oxygen | oxidation-reduction process	50.1.13	Enzyme classification.EC_1 oxidoreductases.EC_1.14 oxidoreductase acting on paired donor with incorporation or reduction of molecular oxygen	XP_019069222.2
Solyc06g068140	-0.594786	6.9077	0.0445166	0.963612	Methyl-CpG binding domain containing protein, expressed	GO:0003677|GO:0005634	DNA binding | nucleus	12.5.4.3	Chromatin organisation.DNA methylation.cytosine methylation reader activities.methylation reader (MBD10-11)	XP_004241694.1
Solyc06g069780	0.617469	4.34929	0.0445598	0.963612	RING/FYVE/PHD zinc finger superfamily protein			35.2	not assigned.not annotated	XP_004241583.1
Solyc07g062480	3.26918	1.41593	0.0442536	0.963612	Serine/threonine-protein kinase			35.1	not assigned.annotated	XP_004244276.2	AT1G78830.1
Solyc09g018440	-4.59544	-2.82475	0.0445375	0.963612	Gamma-interferon-inducible lysosomal thiol reductase, putative			35.2	not assigned.not annotated	XP_010325743.1
Solyc09g060120	-3.58508	-2.1136	0.04436	0.963612	LOW QUALITY:Transducin/WD40 repeat-like superfamily protein	GO:0005515	protein binding	35.2	not assigned.not annotated	XP_004239154.2	AT1G24530.1
Solyc10g078670	-4.30773	-3.10652	0.0445299	0.963612	BZIP transcription factor family protein	GO:0006351|GO:0043565	transcription, DNA-templated | sequence-specific DNA binding	15.5.4.1 | 15.5.4.7.1	RNA biosynthesis.transcriptional regulation.bZIP transcription factor superfamily.transcription factor (bZIP) | RNA biosynthesis.transcriptional regulation.bZIP transcription factor superfamily.TGA transcription factor activity.transcription factor (TGA)	XP_004249162.1
Solyc12g014310	-2.96422	-0.308021	0.0443648	0.963612	pathogenesis-related family protein			35.1	not assigned.annotated	XP_004251898.1
Solyc12g056390	3.33807	-0.660814	0.0444714	0.963612	Thaumatin-like protein			35.1	not assigned.annotated	XP_010314485.1	AT4G11650.1
Solyc03g115120	-1.93146	-1.82643	0.0447614	0.963844	DnaJ domain-containing protein	GO:0046872	metal ion binding	19.1.2.2	Protein homeostasis.protein quality control.ribosome-associated chaperone activities.co-chaperone (Jjj1)	XP_004236500.1	AT1G74250.1
Solyc06g007350	-0.77056	3.5977	0.0446802	0.963844	Protein phosphatase 2C family protein	GO:0003824	catalytic activity	1.1.1.4.1.4	Photosynthesis.photophosphorylation.photosystem II.photosynthetic acclimation.regulator phosphorylation.phosphatase (PBCP)	XP_004240420.1
Solyc07g062680	-1.02491	2.21433	0.0447224	0.963844	lanceolate			15.5.19	RNA biosynthesis.transcriptional regulation.transcription factor (TCP)	NP_001234335.2
Solyc07g062970	0.673365	8.50355	0.0447861	0.963844	protein phosphatase 2C	GO:0004722|GO:0006470	protein serine/threonine phosphatase activity | protein dephosphorylation	18.4.24.2.6	Protein modification.phosphorylation.serine/threonine protein phosphatase superfamily.PPM/PP2C Mn/Mg-dependent phosphatase families.clade F phosphatase	NP_001234500.1
Solyc08g016210	2.19042	3.66066	0.0447762	0.963844	Leucine-rich receptor-like kinase family protein, putative	GO:0005515	protein binding	35.1	not assigned.annotated	XP_025888322.1
Solyc09g089640	1.00177	2.76116	0.0447316	0.963844	LOW QUALITY:Plant/T32M21-140 protein			35.2	not assigned.not annotated	XP_004247703.1	AT3G23160.1
Solyc10g055620	-0.955615	2.1418	0.0447261	0.963844	Heparan-alpha-glucosaminide N-acetyltransferase			35.2	not assigned.not annotated	XP_010327404.1
Solyc10g086190	-1.12646	5.11807	0.0446796	0.963844	Adenosine kinase, putative	GO:0016773	phosphotransferase activity, alcohol group as acceptor	6.1.2.3	Nucleotide metabolism.purines.salvage pathway.adenosine kinase	XP_004249586.1
Solyc01g110910	1.51081	-0.270028	0.0449064	0.965853	Unknown			35.1	not assigned.annotated	XP_004231444.1
Solyc01g089890	2.13878	2.08813	0.0449966	0.966631	PRA1 family protein			35.2	not assigned.not annotated	XP_025887322.1
Solyc05g005670	-2.55504	-2.18295	0.0449772	0.966631	U-box domain-containing protein 18	GO:0005515	protein binding	19.2.2.1.5.2.1	Protein homeostasis.ubiquitin-proteasome system.ubiquitin-fold protein conjugation.ubiquitin conjugation (ubiquitylation).ubiquitin-ligase E3 activities.U-Box E3 ligase activities.E3 ubiquitin ligase (PUB)	XP_004239352.1	AT1G60190.1
Solyc03g111680	-1.29116	0.528388	0.0452494	0.97107	DNA polymerase III subunit gamma/tau	GO:0003887|GO:0005524|GO:0006260|GO:0009360	DNA-directed DNA polymerase activity | ATP binding | DNA replication | DNA polymerase III complex	35.1	not assigned.annotated	XP_025885824.1
Solyc08g063080	-0.626546	7.09056	0.0452848	0.97107	UDP-sulfoquinovose synthase	GO:0003824|GO:0050662	catalytic activity | coenzyme binding	5.3.6	Lipid metabolism.galactolipid and sulfolipid biosynthesis.UDP-sulfoquinovose synthase	XP_010324955.1
Solyc10g050750	-5.46986	-3.36504	0.0452821	0.97107	disease resistance protein (TIR-NBS-LRR class)			35.2	not assigned.not annotated	XP_010312315.1
Solyc11g011400	0.762678	5.23	0.0453433	0.971742	Linoleate 9S-lipoxygenase			35.2	not assigned.not annotated	XP_010323459.1
Solyc04g052960	5.16055	-3.02017	0.0454089	0.972069	SAUR-like auxin-responsive protein family, putative	GO:0009733	response to auxin	35.1	not assigned.annotated	XP_019069042.1	AT1G29500.1
Solyc12g009745	3.11035	-1.54201	0.0454129	0.972069	Leucine-rich-repeat receptor-like protein	GO:0005515	protein binding	35.1	not assigned.annotated	XP_010313802.1
Solyc00g020020	-5.22917	-3.05382	0.045808	0.973677	LOW QUALITY:DEAD-box ATP-dependent RNA helicase 49			35.2	not assigned.not annotated	XP_025886357.1
Solyc02g062385	1.62659	-1.03326	0.0457588	0.973677	GATA transcription factor	GO:0006355|GO:0008270	regulation of transcription, DNA-templated | zinc ion binding	15.5.1.3	RNA biosynthesis.transcriptional regulation.C2C2 transcription factor superfamily.transcription factor (GATA)	XP_010317231.1
Solyc02g086400	-3.08768	-2.06413	0.045754	0.973677	RING/U-box superfamily protein			35.2	not assigned.not annotated	XP_025885262.1
Solyc05g006690	-1.36965	-0.294875	0.0457348	0.973677	transmembrane protein, putative (DUF247)			35.1	not assigned.annotated	XP_010320641.1
Solyc06g048410	-0.738888	8.09195	0.0458147	0.973677	iron superoxide dismutase	GO:0004784|GO:0006801|GO:0046872|GO:0055114	superoxide dismutase activity | superoxide metabolic process | metal ion binding | oxidation-reduction process	10.2.2.1 | 15.6.1.2.2.9	Redox homeostasis.enzymatic reactive oxygen species scavengers.superoxide dismutase activities.iron superoxide dismutase | RNA biosynthesis.organelle machinery.RNA polymerase activities.plastid-encoded RNA polymerase (PEP) complex.essential co-factor components.component PAP9/FSD2	NP_001233789.2
Solyc08g008490	0.555972	5.37325	0.0457832	0.973677	WD-repeat protein, putative	GO:0005515	protein binding	35.1	not assigned.annotated	XP_010324651.1
Solyc08g065260	-0.828076	3.69201	0.0457507	0.973677	ATP-dependent Clp protease proteolytic subunit			35.1	not assigned.annotated	XP_004245103.1
Solyc09g009830	-1.41365	2.90152	0.0457222	0.973677	Carbonic anhydrase family protein	GO:0004089|GO:0006730|GO:0008270	carbonate dehydratase activity | one-carbon metabolic process | zinc ion binding	50.4.2	Enzyme classification.EC_4 lyases.EC_4.2 carbon-oxygen lyase	XP_025888804.1
Solyc09g064330	2.99249	-2.19246	0.0457941	0.973677	RmlC-like cupins superfamily protein			35.1	not assigned.annotated	XP_004247124.1
Solyc09g090990	5.92107	0.212558	0.0456949	0.973677	PR10 protein	GO:0006952|GO:0009607	defense response | response to biotic stimulus	35.1	not assigned.annotated	NP_001234352.2	AT1G24020.1
Solyc09g098500	-0.832062	2.94612	0.0457367	0.973677	Got1/Sft2-like vescicle transport protein family	GO:0016192	vesicle-mediated transport	35.2	not assigned.not annotated	XP_004247981.1
Solyc12g096870	-1.51813	3.72066	0.0457895	0.973677	Glycosyltransferase	GO:0008152|GO:0016758	metabolic process | transferase activity, transferring hexosyl groups	50.2.4 | 3	Enzyme classification.EC_2 transferases.EC_2.4 glycosyltransferase | Carbohydrate metabolism	XP_004253024.1	AT4G15480.1
Solyc02g086300	-1.22459	7.86608	0.0458467	0.97378	Class I glutamine amidotransferase-like superfamily protein	GO:0006541|GO:0016787	glutamine metabolic process | hydrolase activity	35.1	not assigned.annotated	XP_004232334.1
Solyc07g040950	-0.692766	4.33495	0.0459246	0.974855	Lactoylglutathione lyase / glyoxalase I family protein			35.2	not assigned.not annotated	XP_004243741.1
Solyc07g014650	0.582786	5.76314	0.0459746	0.975338	ADP-ribosylation factor family protein	GO:0005525|GO:0005622|GO:0007264	GTP binding | intracellular | small GTPase mediated signal transduction	20.3.3.2 | 22.3.2.1	Cytoskeleton organisation.actin and tubulin folding.post-CCT Tubulin folding pathway.tubulin folding cofactor (ARL2) | Vesicle trafficking.Coat protein I (COPI) coatomer machinery.coat protein recruiting.ARF-GTPase	XP_004242873.1
Solyc03g097085	3.49163	-2.54753	0.0461309	0.977523	LOW QUALITY:Cysteine protease	GO:0008234	cysteine-type peptidase activity	50.3.4	Enzyme classification.EC_3 hydrolases.EC_3.4 hydrolase acting on peptide bond (peptidase)	XP_025885793.1
Solyc11g011330	3.78315	2.45353	0.0461323	0.977523	Alcohol dehydrogenase, putative	GO:0055114	oxidation-reduction process	50.1.1	Enzyme classification.EC_1 oxidoreductases.EC_1.1 oxidoreductase acting on CH-OH group of donor	XP_004250191.1
Solyc02g032120	0.584091	4.53125	0.046185	0.978062	Zinc finger family protein	GO:0046872	metal ion binding	15.5.15	RNA biosynthesis.transcriptional regulation.transcription factor (C2H2-ZF)	XP_004231601.1
Solyc05g046283	3.22556	-2.34204	0.0462423	0.978183	Alcohol dehydrogenase, putative			35.2	not assigned.not annotated	XP_004239630.1
Solyc06g068950	-1.13346	4.07073	0.0462728	0.978183	Phosphoethanolamine N-methyltransferase	GO:0008152|GO:0008168	metabolic process | methyltransferase activity	5.2.4.1	Lipid metabolism.glycerolipid biosynthesis.phosphatidylcholine.phospho-base N-methyltransferase	XP_004241642.1
Solyc10g009420	0.778193	3.68235	0.0462481	0.978183	E3 ubiquitin-protein ligase	GO:0008270	zinc ion binding	19.2.2.1.5.3.5	Protein homeostasis.ubiquitin-proteasome system.ubiquitin-fold protein conjugation.ubiquitin conjugation (ubiquitylation).ubiquitin-ligase E3 activities.RING-domain E3 ligase activities.E3 ubiquitin ligase (SINA)	XP_004248082.1
Solyc07g007125	2.04027	-2.03634	0.046324	0.978688	embryonic flower 1 (EMF1)			50.2.7	Enzyme classification.EC_2 transferases.EC_2.7 transferase transferring phosphorus-containing group	XP_010326253.1
Solyc01g102450	-2.99636	-2.26531	0.0463768	0.978964	organic solute transporter ostalpha protein (DUF300)			35.2	not assigned.not annotated	XP_025888802.1
Solyc11g068790	-0.609563	4.52972	0.0463918	0.978964	Protein FAM210B			35.2	not assigned.not annotated	XP_004251086.1
Solyc02g088140	1.73531	-1.2273	0.0465236	0.979836	Pentatricopeptide repeat-containing protein			35.1	not assigned.annotated	XP_004237581.1
Solyc09g030370	1.88434	1.05853	0.0465353	0.979836	GDSL esterase/lipase	GO:0016788	hydrolase activity, acting on ester bonds	35.1	not assigned.annotated	XP_004246974.1
Solyc09g061830	4.49235	-3.11918	0.0465427	0.979836	LOW QUALITY:Short chain dehydrogenase/reductase family protein			35.2	not assigned.not annotated	XP_004230001.1
Solyc11g039750	-5.28643	-3.1247	0.0465149	0.979836	MYB transcription factor	GO:0003677	DNA binding	35.2	not assigned.not annotated	XP_010318340.1
Solyc01g111145	-1.56862	6.45411	0.0465767	0.979975	Proline-rich protein			35.1	not assigned.annotated	XP_004230916.1
Solyc12g009730	3.10985	-1.55077	0.0468202	0.984517	Leucine-rich-repeat receptor-like protein	GO:0005515	protein binding	35.1	not assigned.annotated	XP_010313802.1
Solyc10g087010	0.604384	5.30765	0.0468684	0.984952	Cytochrome P450	GO:0016705|GO:0055114	oxidoreductase activity, acting on paired donors, with incorporation or reduction of molecular oxygen | oxidation-reduction process	50.1.13	Enzyme classification.EC_1 oxidoreductases.EC_1.14 oxidoreductase acting on paired donor with incorporation or reduction of molecular oxygen	XP_004249519.1
Solyc02g062500	0.816145	11.7045	0.0469865	0.986854	2-oxoglutarate-dependent dioxygenase-related family protein	GO:0016491|GO:0055114	oxidoreductase activity | oxidation-reduction process	50.1.13	Enzyme classification.EC_1 oxidoreductases.EC_1.14 oxidoreductase acting on paired donor with incorporation or reduction of molecular oxygen	XP_004233539.1
Solyc02g094460	-2.27242	-2.0896	0.0470634	0.987812	B3 domain transcription factor	GO:0003677	DNA binding	15.5.5.5	RNA biosynthesis.transcriptional regulation.B3 transcription factor superfamily.transcription factor (LAV-ABI3)	XP_004231748.2
Solyc03g118310	-4.59774	-2.55849	0.0471881	0.987812	bHLH transcription factor 083	GO:0046983	protein dimerization activity	15.5.32 | 26.4.3.4.1	RNA biosynthesis.transcriptional regulation.transcription factor (bHLH) | External stimuli response.temperature.cold response.ICE-CBF cold acclimation transcriptional cascade.transcription factor (ICE1|2)	XP_004235842.1
Solyc05g008180	0.621942	4.16979	0.0471556	0.987812	quinolinate phoshoribosyltransferase	GO:0016763	transferase activity, transferring pentosyl groups	7.9.1.3	Coenzyme metabolism.NAD/NADP biosynthesis.de-novo pathway.quinolinate phosphoribosyl transferase	NP_001316455.1
Solyc05g012180	3.37242	0.157041	0.0471727	0.987812	methyl esterase 13			35.1	not assigned.annotated	XP_004239042.1
Solyc09g018690	0.5868	4.25496	0.0471978	0.987812	ATP-dependent DNA helicase RecQ	GO:0006260|GO:0006281|GO:0043140	DNA replication | DNA repair	35.1	not assigned.annotated	XP_004246792.1
Solyc11g069080	0.582515	5.08578	0.0470974	0.987812	50S ribosomal L18	GO:0003735|GO:0005622|GO:0005840|GO:0006412	structural constituent of ribosome | intracellular | ribosome | translation	35.2	not assigned.not annotated	XP_010313387.1
Solyc03g113390	0.743814	6.92844	0.047328	0.988801	Calcium-dependent protein kinase	GO:0005524	ATP binding	18.4.5.4 | 25.1.2.1	Protein modification.phosphorylation.CAMK protein kinase superfamily.protein kinase (CDPK) | Nutrient uptake.nitrogen assimilation.nitrate-CPK-NLP signalling network.nitrate response regulator kinase (CPK10/30)	NP_001265972.2
Solyc05g005580	-2.79741	-2.04617	0.0473177	0.988801	DUF936 family protein			20.1.5.4.2	Cytoskeleton organisation.microtubular network.microtubule dynamics.cortical microtubule organisation.regulatory protein (CORD)	XP_004238670.1
Solyc08g082690	-1.2185	0.732344	0.0473069	0.988801	Ribosomal protein S6	GO:0003735|GO:0005840|GO:0006412|GO:0019843	structural constituent of ribosome | ribosome | translation | rRNA binding	17.7.2.2.6	Protein biosynthesis.organelle machinery.plastidial ribosome.small ribosomal subunit proteome.component psRPS6	XP_004245494.1	AT1G64510.1
Solyc04g007940	-4.86813	-3.33051	0.0473614	0.988921	Cytochrome P450 monooxygenase	GO:0016705|GO:0055114	oxidoreductase activity, acting on paired donors, with incorporation or reduction of molecular oxygen | oxidation-reduction process	50.1.13	Enzyme classification.EC_1 oxidoreductases.EC_1.14 oxidoreductase acting on paired donor with incorporation or reduction of molecular oxygen	XP_004236938.1
Solyc02g030170	-0.600251	8.93497	0.0474139	0.989441	DWARF1/DIMINUTO	GO:0050660	flavin adenine dinucleotide binding	5.5.1.7	Lipid metabolism.phytosterol biosynthesis.campesterol.sterol delta24 reductase	NP_001234550.1
Solyc06g036238	2.26482	-1.7158	0.0475407	0.991508	Drug resistance transporter-like ABC domain protein	GO:0016020	membrane	35.1	not assigned.annotated	XP_025887045.1
Solyc01g056260	-2.75897	-1.88015	0.0479966	0.994919	LOW QUALITY:protein kinase family protein			35.2	not assigned.not annotated	XP_025888423.1
Solyc01g057460	0.666054	4.86431	0.0481493	0.994919	mediator of RNA polymerase II transcription subunit 15a-like protein	GO:0003712|GO:0006355	transcription coregulator activity | regulation of transcription, DNA-templated	35.1	not assigned.annotated	XP_010319382.1
Solyc01g101170	5.17233	2.29738	0.0478246	0.994919	Viridiflorene synthase	GO:0008152|GO:0010333|GO:0016829	metabolic process | terpene synthase activity | lyase activity	9.1.4.2	Secondary metabolism.terpenoids.terpene biosynthesis.mono-/sesquiterpene-/diterpene synthase	NP_001239040.1
Solyc02g067620	0.662756	4.40241	0.0480568	0.994919	Metal tolerance protein 8	GO:0006812|GO:0008324|GO:0016021|GO:0055085	cation transport | cation transmembrane transporter activity | integral component of membrane | transmembrane transport	24.2.9.2.3	Solute transport.carrier-mediated transport.CDF superfamily.CDF family.zinc cation transporter (Zn-CDF)	XP_004233338.1
Solyc02g070000	-0.721646	3.85591	0.0478635	0.994919	Leucine-rich receptor-like protein kinase family protein	GO:0005515	protein binding	18.4.1.3	Protein modification.phosphorylation.TKL protein kinase superfamily.protein kinase (LRR-III)	XP_004233157.1
Solyc03g111140	-1.76655	-0.348335	0.0481115	0.994919	Malate synthase	GO:0004474|GO:0006097	malate synthase activity | glyoxylate cycle	5.7.3.6.4	Lipid metabolism.lipid degradation.fatty acid degradation.glyoxylate cycle.malate synthase	XP_004236345.1
Solyc03g119540	-1.41203	2.68919	0.0480662	0.994919	CONSTANS-like zinc finger protein	GO:0005622|GO:0008270	intracellular | zinc ion binding	15.5.1.2	RNA biosynthesis.transcriptional regulation.C2C2 transcription factor superfamily.transcription factor (BBX-CO)	XP_004235805.1
Solyc03g119930	-1.1706	3.01201	0.0479629	0.994919	Sulfate transporter, putative	GO:0015098|GO:0015689|GO:0016021	molybdate ion transmembrane transporter activity | molybdate ion transport | integral component of membrane	24.2.3.1.2	Solute transport.carrier-mediated transport.APC superfamily.SulP family.molybdate transporter (MOT)	XP_004235726.1	AT1G80310.1
Solyc03g120790	-2.48918	-0.204333	0.0481256	0.994919	LOW QUALITY:ovate family protein 8			35.2	not assigned.not annotated	XP_010318537.1	AT1G15260.1
Solyc04g008250	-2.43526	-0.347568	0.0480248	0.994919	PURPLE ACID PHOSPHATASE family protein	GO:0016787	hydrolase activity	35.1	not assigned.annotated	XP_025886223.1	AT1G14700.1
Solyc04g054190	-0.77672	5.63137	0.0478294	0.994919	ABC1 protein			18.4.7.4	Protein modification.phosphorylation.atypical protein kinase families.protein kinase (ABC1)	XP_010319774.1
Solyc05g005480	-0.741001	5.95267	0.0480223	0.994919	Quinone oxidoreductase-like protein	GO:0055114	oxidation-reduction process	50.1.3	Enzyme classification.EC_1 oxidoreductases.EC_1.3 oxidoreductase acting on CH-CH group of donor	NP_001296292.1	AT1G23740.1
Solyc07g006340	-0.697179	4.56892	0.0479355	0.994919	Acyl-CoA N-acyltransferase	GO:0008080	N-acetyltransferase activity	35.2	not assigned.not annotated	XP_004242650.1
Solyc07g049500	0.640718	3.81339	0.0480504	0.994919	Argonaute6	GO:0005515	protein binding	12.5.1.13	Chromatin organisation.DNA methylation.RNA-directed DNA methylation (RdDM) pathway.siRNA-integrating factor (AGO)	XP_010323601.1
Solyc09g090980	1.76994	5.81642	0.0478929	0.994919	Major allergen Mal d 1	GO:0006952|GO:0009607	defense response | response to biotic stimulus	35.1	not assigned.annotated	NP_001275580.1
Solyc12g056830	-0.863259	6.43986	0.0478042	0.994919	ATP synthase delta-subunit protein	GO:0015986|GO:0046933	ATP synthesis coupled proton transport | proton-transporting ATP synthase activity, rotational mechanism	1.1.9.2.4	Photosynthesis.photophosphorylation.ATP synthase complex.peripheral CF1 subcomplex.subunit delta	XP_004252554.1	AT4G09650.1
Solyc01g091230	-3.10552	-2.80873	0.0481814	0.995007	Receptor-like kinase	GO:0005515	protein binding	18.4.1.4	Protein modification.phosphorylation.TKL protein kinase superfamily.protein kinase (LRR-IV)	XP_004229807.1
Solyc07g053530	-2.15758	-0.666646	0.0482586	0.996027	Fasciclin-like arabinogalactan protein			35.1	not assigned.annotated	XP_004243817.1	AT1G03870.1
Solyc01g099920	-0.799867	6.88666	0.0483028	0.996363	PAR1 protein			35.2	not assigned.not annotated	XP_004230259.1
[truncated: 34,034 more rows]

## Sheet: WT-IG_vs_PHYB1B2-IG
Supplementary Table 5. DEGs in phyA and phyB1B1 mutants at IG and BK stages. Up- and down-regulated genes in the mutants compared to WT are highlighted in red and blue, respectively.
[truncated: 35,769 more rows]

[truncated: 2 more sheets: WT-BK_vs_PHYA-BK, WT-BK_vs_PHYB1B2-BK]
