# Supplementary material for: Phytochrome-Mediated Light Perception Affects Fruit Development and Ripening Through Epigenetic Mechanisms
Source: Front Plant Sci. 2022 Apr 28;13:870974. doi: 10.3389/fpls.2022.870974 (PMC9096621; doi:10.3389/fpls.2022.870974)
Supplement: Supplementary file 4 [file Data_Sheet_4.XLSX]

## Sheet: Table S6
Supplementary Table 6. Validation of RNASeq analysis via RT-qPCR at immature green (IG) and breaker (BK) stages.
Locus	Gene ID	STAGE	FC_phyB1B2	FDR	p-value	RT-qPCR_phyB1B2	p-value	FC_phyA	FDR	p-value	RT-qPCR_phyA	p-value
Solyc10g008740	CHLD	Inmature Green	-1.17554	0.0673924	0.00113619	-1.13103	0.0034	-0.879792	0.557149	0.0132644	-0.880264	0.0053
Solyc03g118240	CHLM	Inmature Green	-1.28099	0.0304664	0.000386246	0.0410403	0.8463	-1.03037	0.279694	0.00409751	0.171732	0.5692
Solyc10g077040	CRD1	Inmature Green	-0.686526	0.70911	0.0545393	-0.866134	0.0058	-0.895434	0.538496	0.0124658	0.234364	0.3325
Solyc12g013710	POR1	Inmature Green	-2.9579	0.000379334	< 0.0001	-2.21489	< 0.001	-1.76435	0.213521	0.00267135	-0.49721	0.018
Solyc10g006900	POR2	Inmature Green	-1.94315	0.0760994	0.00134676	-0.965159	0.0357	-1.59146	0.424485	0.00796198	0.383252	0.336
Solyc07g054210	POR3	Inmature Green	-1.65212	0.000872633	< 0.0001	-0.428103	0.05	-1.12056	0.146798	0.00152196	0.221364	0.485
Solyc01g067890	DXS1	Breaker	-0.994678	0.209738	0.0267789	-0.535269	0.0133	-0.355076	1	0.425316	0.40795	0.22
Solyc01g009010	ISPE	Breaker	-0.954193	0.0710548	0.00564974	-1.00202	0.042	0.193651	1	0.570899	0.767244	0.083
Solyc04g079960	GGPS2	Breaker	-1.26701	0.0738108	0.00594936	-0.987167	0.04	0.369572	1	0.415613	0.394087	0.2
Solyc03g031860	PSY1	Breaker	-1.28113	0.0978116	0.00892851	-1.12718	0.027	-0.232919	1	0.629328	0.157465	0.59
Solyc03g123760	PDS	Breaker	-1.27276	0.00886398	0.000332325	-1.15188	0.005	0.342312	1	0.327297	0.64257	0.02
solyc01g097810	ZDS	Breaker	-1.09462	0.00976302	0.000377768	-0.946049	0.009	0.0601655	1	0.84337	0.0970906	0.636
Solyc10g081650	CRTISO	Breaker	-1.30972	0.00810372	0.000295665	-1.45359	0.003	0.338932	1	0.341363	0.549555	0.077
Solyc07g043580	PIF4	Breaker	2.10297	0.00977068	0.00037835	1.86705	0.012	1.55475	0.107792	0.00782941	2.1539	0.019
Solyc07g061990	SPS	Breaker	0.0445412	1	0.89069	0.0624489	0.82	0.870156	0.101884	0.00724083	0.588611	0.044
Validated genes are highlighted

## Sheet: Table S7
Supplementary Table 7. Control ripening-associated genes for RNAseq data.					WT BK vs WT IG		PHYA BK vs PHYA IG		PHYB1B2 BK vs PHYB1B2 IG
Locus	Gene	Description	Expected change BK vs IG	Reference
					logFC	FDR	logFC	FDR	logFC	FDR
Solyc05g012020	Sl-RIN	Transcription factor (MADS/AGL)	up	Cruz et al., 2018	10.7084	6.44544e-27	7.0604	7.17328e-16	5.9857	2.42304e-12
Solyc10g006880	Sl-NOR	Transcription factor (NAC)	up	Cruz et al., 2018	6.70362	5.09102e-23	4.16607	1.89036e-11	3.91011	4.3009e-10
Solyc03g044300	Sl-AP2a	Transcription factor (AP2)	up	Cruz et al., 2018	4.00934	9.81779e-15	2.55952	4.74795e-07	2.56259	8.35091e-07
Solyc06g069430	Sl-FUL1	Transcription factor (MADS/AGL)	up	Cruz et al., 2018	3.57227	1.82817e-16	2.65334	6.85149e-10	0.785261	0.13475
Solyc03g031860	Sl-PSY1	Carotenoid biosynthesis (phytoene synthase)	up	Cruz et al., 2018	7.49538	1.56514e-28	6.49909	3.06944e-23	5.76362	3.87134e-19
Solyc03g123760	Sl-PDS	Carotenoid biosynthesis (phytoene desaturase)	up	Cruz et al., 2018	1.44541	0.000332902	2.22482	5.03948e-08	0.781304	0.115681
Solyc09g075440	Sl-ETR3	ETR/ERS-type ethylene receptor protein	up	Liu et al., 2015	4.36836	5.61242e-16	3.04203	7.32999e-09	3.94774	5.35785e-13
Solyc06g053710	Sl-ETR4	ETR/ERS-type ethylene receptor protein	up	Liu et al., 2015	2.70863	3.05707e-10	1.49024	0.000784957	2.27722	3.3881e-07
Solyc09g089610	Sl-ETR6	ETR/ERS-type ethylene receptor protein	up	Liu et al., 2015	2.03119	0.00292342	0.415406	0.619877	3.42904	2.57956e-06
Solyc01g065980	Sl-ERF.E4	Transcription factor (ERF)	up	Liu et al., 2014	1.81462	1.71657e-05	1.66921	0.000124877	1.48374	0.00125332
Solyc07g049530	Sl-ACO1	Ethylene biosynthesis.1-aminocyclopropane-1-carboxylate oxidase	up	Liu et al., 2015	3.81821	3.0487e-06	2.47272	0.0026248	2.90429	0.000762521
Solyc07g049550	Sl-ACO3	Ethylene biosynthesis.1-aminocyclopropane-1-carboxylate oxidase	up	Liu et al., 2015	3.56705	1.55372e-06	1.75224	0.020454	3.79945	1.15086e-06
Solyc02g036350	Sl-ACO6	Ethylene biosynthesis.1-aminocyclopropane-1-carboxylate oxidase	up	Liu et al., 2015	1.51455	0.0903417	3.44508	0.00018888	5.31266	8.35343e-08
Solyc01g095080	Sl-ACS2	Ethylene biosynthesis. 1-aminocyclopropane-1-carboxylate synthase	up	Liu et al., 2015	12.1391	5.07721e-23	7.64892	3.98489e-13	6.30647	6.97634e-10
Solyc05g050010	Sl-ACS4	Ethylene biosynthesis. 1-aminocyclopropane-1-carboxylate synthase	up	Liu et al., 2015	9.7614	5.14934e-28	7.53106	3.15893e-20	6.87077	2.05756e-17
Solyc10g080210	Sl-PG2a	Polygalacturonase	up	Liu et al., 2014	13.0522	1.8902e-24	15.9465	7.34223e-17	12.2937	9.4179e-22
Solyc08g006960	Sl-CAC	AP-2 complex subunit mu	constitutive	Expósito-Rodríguez et al., 2008	-0.133486	0.729252	0.421107	0.226889	0.00814377	1
Solyc07g025390	Sl-EXPRESSED	Peptidyl-prolyl cis-trans isomerase cyclophilin-type	constitutive	Expósito-Rodríguez et al., 2008	0.316819	0.414725	0.387424	0.330956	-0.0735399	0.920104
Highlighted FDR values are significantly different between BK and IG stages.
