# Supplementary material for: Phytochrome-Mediated Light Perception Affects Fruit Development and Ripening Through Epigenetic Mechanisms
Source: Front Plant Sci. 2022 Apr 28;13:870974. doi: 10.3389/fpls.2022.870974 (PMC9096621; doi:10.3389/fpls.2022.870974)
Supplement: Supplementary file 5 [file Data_Sheet_5.XLSX]

## Sheet: 01_Photosynthesis
Supplementary Table 8.Mapman categories of DEGs between phyA_IG and WT_IG.
BinCode	BinName	id	type	description	FoldChange	down	up			sum_down	sum_up
1.1.1.1.1	Photosynthesis.photophosphorylation.photosystem II.LHC-II complex.component LHCb1/2/3	solyc02g070940.1.1	Transcript	component LHCb1/2/3 of LHC-II complex (original description: Chlorophyll a-b binding protein, chloroplastic (AHRD V3.3 *** Q41422_SOLTU)) &	-2.88606	1	0			8	1
1.1.1.1.1	Photosynthesis.photophosphorylation.photosystem II.LHC-II complex.component LHCb1/2/3	solyc03g005760.1.1	Transcript	component LHCb1/2/3 of LHC-II complex (original description: chlorophyll a/b-binding protein) &	-3.07864	1	0
1.1.1.1.1	Photosynthesis.photophosphorylation.photosystem II.LHC-II complex.component LHCb1/2/3	solyc03g005770.3.1	Transcript	component LHCb1/2/3 of LHC-II complex (original description: chlorophyll a/b-binding protein) &	-3.20441	1	0
1.1.1.1.1	Photosynthesis.photophosphorylation.photosystem II.LHC-II complex.component LHCb1/2/3	solyc03g005780.3.1	Transcript	component LHCb1/2/3 of LHC-II complex (original description: chlorophyll a/b-binding protein Cab-3C) &	-3.83716	1	0
1.1.1.1.1	Photosynthesis.photophosphorylation.photosystem II.LHC-II complex.component LHCb1/2/3	solyc07g063600.3.1	Transcript	component LHCb1/2/3 of LHC-II complex (original description: Chlorophyll a-b binding protein, chloroplastic (AHRD V3.3 *** M1BNX7_SOLTU)) &	-2.60107	1	0
1.1.1.1.3	Photosynthesis.photophosphorylation.photosystem II.LHC-II complex.component LHCb5	solyc06g063370.3.1	Transcript	component LHCb5 of LHC-II complex (original description: Type I (26 kD) CP29 polypeptide) &	-1.88332	1	0
1.1.1.2.9	Photosynthesis.photophosphorylation.photosystem II.PS-II complex.component PsbR	solyc12g017250.2.1	Transcript	component PsbR of PS-II complex (original description: Photosystem II 10 kDa polypeptide family protein (AHRD V3.3 *** A9PH94_POPTR)) &	2.12102	0	1
1.2	Photosynthesis.calvin cycle	solyc01g079470.3.1	Id	(original description: CP12 (AHRD V3.3 *** O24136_TOBAC)) & Calvin cycle protein CP12-1, chloroplastic OS=Arabidopsis thaliana (sp|o22914|cp121_arath : 85.9)	-2.85766	1	0
1.2.1.3.2	Photosynthesis.calvin cycle.ribulose-1,5-bisphosphat carboxylase/oxygenase (RuBisCo) activity.RuBisCo regulation.ATP-dependent activase (RCA)	solyc09g011080.3.1	Transcript	ATP-dependent activase involved in RuBisCo regulation (original description: Ribulose bisphosphate carboxylase/oxygenase activase (AHRD V3.3 *** V9IMY5_NICAT)) &	-1.45603	1	0

## Sheet: 02_Cellular_respiration
Supplementary Table 8.Mapman categories of DEGs between phyA_IG and WT_IG.
BinCode	BinName	id	type	description	FoldChange	down	up			sum_down	sum_up
2.1.1.1.1	Cellular respiration.glycolysis.cytosolic glycolysis.phosphofructokinase activities.ATP-dependent phosphofructokinase	solyc05g024230.2.1	Id	no hits & (original description: ATP-dependent 6-phosphofructokinase (AHRD V3.3 *-* A0A0V0IM90_SOLCH))	-3.01228	1	0			3	1
2.4	Cellular respiration.oxidative phosphorylation	solyc07g008103.1.1	Id	(original description: Blue copper protein (AHRD V3.3 *-* A0A151SLU0_CAJCA)) & Blue copper protein OS=Pisum sativum (sp|q41001|bcp_pea : 103.0)	-3.8427	1	0
2.4.1	Cellular respiration.oxidative phosphorylation.NADH dehydrogenase complex	solyc12g035223.1.1	Id	no hits & (original description: Cytochrome b561 and DOMON domain-containing protein At5g35735 (AHRD V3.3 --* B561P_ARATH))	10.5541	0	1
2.4.1.4.1	Cellular respiration.oxidative phosphorylation.NADH dehydrogenase complex.non-core components.alpha subcomplex	solyc03g006540.3.1	Id	no hits & (original description: NADH-ubiquinone oxidoreductase 75 kDa subunit, mitochondrial (AHRD V3.3 *-* N1QXW8_AEGTA))	-6.42356	1	0

## Sheet: 03_Carbohydrate_metabolism
Supplementary Table 8.Mapman categories of DEGs between phyA_IG and WT_IG.
BinCode	BinName	id	type	description	FoldChange	down	up			sum_down	sum_up
3.1.4.1	Carbohydrate metabolism.sucrose metabolism.degradation.invertase activities	solyc03g083770.1.1	Id	(original description: Plant invertase/pectin methylesterase inhibitor superfamily protein (AHRD V3.3 *** AT5G62360.1)) & 21 kDa protein OS=Daucus carota (sp|p17407|21kd_dauca : 149.0)	-2.50129	1	0			1	0

## Sheet: 04_Amino_acid_metabolism
Supplementary Table 8.Mapman categories of DEGs between phyA_IG and WT_IG.
BinCode	BinName	id	type	description	FoldChange	down	up			sum_down	sum_up
4.1.2.2.6.3.1	Amino acid metabolism.biosynthesis.aspartate family.aspartate-derived amino acids.methionine.S-methylmethionine cycle.homocysteine S-methyltransferase	solyc09g082460.3.1	Transcript	homocysteine S-methyltransferase (original description: Homocysteine S-methyltransferase (AHRD V3.3 *** M1P405_PRUPE)) &	3.31039	0	1			0	1

## Sheet: 05_Lipid_metabolism
Supplementary Table 8.Mapman categories of DEGs between phyA_IG and WT_IG.
BinCode	BinName	id	type	description	FoldChange	down	up			sum_down	sum_up
5.1	Lipid metabolism.fatty acid biosynthesis	solyc03g045140.3.1	Id	(original description: Cyclopropane-fatty-acyl-phospholipid synthase (AHRD V3.3 *** AT3G23530.1)) & Probable (S)-tetrahydroprotoberberine N-methyltransferase 2 OS=Papaver bracteatum (sp|c3sbu4|tnmt2_papbr : 94.7)	4.42797	0	1			1	5
5.1.7.1	Lipid metabolism.fatty acid biosynthesis.fatty acid desaturation.stearoyl-ACP desaturase	solyc06g059720.3.1	Transcript	stearoyl-ACP desaturase (original description: Acyl-[acyl-carrier-protein] desaturase (AHRD V3.3 *** A0A118HPD5_CYNCS)) &	4.86168	0	1
5.1.7.3	Lipid metabolism.fatty acid biosynthesis.fatty acid desaturation.omega-3/omega-6 fatty acid desaturase (FAD2/3/6-8)	solyc12g049030.1.1	Transcript	omega-3/omega-6 fatty acid desaturase (original description: Fatty acid desaturase (AHRD V3.3 *** B3SP99_CAPAN)) &	11.5969	0	1
5.1.7.3	Lipid metabolism.fatty acid biosynthesis.fatty acid desaturation.omega-3/omega-6 fatty acid desaturase (FAD2/3/6-8)	solyc12g100260.1.1	Transcript	omega-3/omega-6 fatty acid desaturase (original description: Fatty acid desaturase (AHRD V3.3 *-* B3SP99_CAPAN)) &	7.74999	0	1
5.5.1.1	Lipid metabolism.phytosterol biosynthesis.campesterol.sterol C-24 methyltransferase	solyc01g111900.3.1	Id	Acetylserotonin O-methyltransferase OS=Arabidopsis thaliana (sp|q9t003|asmt_arath : 297.0) & Enzyme classification.EC_2 transferases.EC_2.1 transferase transferring one-carbon group(50.2.1 : 215.9) (original description: O-methyltransferase, putative (AHRD V3.3 *** B9SUX6_RICCO)) &	5.94362	0	1
5.7.1	Lipid metabolism.lipid degradation.triacylglycerol lipase activities	solyc03g005900.3.1	Id	(original description: GDSL-lipase protein (AHRD V3.3 *** Q08ET5_CAPAN)) & GDSL esterase/lipase At1g29670 OS=Arabidopsis thaliana (sp|q9c7n4|gdl15_arath : 259.0)	-6.52001	1	0

## Sheet: 06_Nucleotide_metabolism
Supplementary Table 8.Mapman categories of DEGs between phyA_IG and WT_IG.
BinCode	BinName	id	type	description	FoldChange	down	up			sum_down	sum_up
6.1	Nucleotide metabolism.purines	solyc05g043390.2.1	Id	no hits & (original description: Pseudouridine-5'-phosphate glycosidase (AHRD V3.3 --* M7YM69_TRIUA))	-5.01333	1	0			1	0

## Sheet: 07_Coenzyme_metabolism
Supplementary Table 8.Mapman categories of DEGs between phyA_IG and WT_IG.
BinCode	BinName	id	type	description	FoldChange	down	up			sum_down	sum_up
7.12.4.2.1	Coenzyme metabolism.tetrapyrrol biosynthesis.protoporphyrin IX formation.coproporphyrinogen III oxidase activities.oxygen-dependent coproporphyrinogen III oxidase (HemF)	solyc10g005120.2.1	Transcript	oxygen-dependent coproporphyrinogen III oxidase (HemF) (original description: 2-oxoglutarate (2OG) and Fe(II)-dependent oxygenase superfamily protein (AHRD V3.3 *** AT4G16330.2)) &	8.72583	0	1			0	1

## Sheet: 08_Polyamine_metabolism
Supplementary Table 8.Mapman categories of DEGs between phyA_IG and WT_IG.
						down	up			sum_down	sum_up
										0	0

## Sheet: 09_Secondary_metabolism
Supplementary Table 8.Mapman categories of DEGs between phyA_IG and WT_IG.
BinCode	BinName	id	type	description	FoldChange	down	up			sum_down	sum_up
9.2.2.6.1	Secondary metabolism.phenolics.flavonoid biosynthesis.flavonol glycosides.flavonol 3-O-glycosyltransferase	solyc01g107830.3.1	Transcript	flavonol 3-O-glycosyltransferase (original description: Glycosyltransferase (AHRD V3.3 *** K4B2Z9_SOLLC)) &	1.89818	0	1			0	1

## Sheet: 10_Redox_homeostasis
Supplementary Table 8.Mapman categories of DEGs between phyA_IG and WT_IG.
BinCode	BinName	id	type	description	FoldChange	down	up			sum_down	sum_up
10	Redox homeostasis	solyc08g078460.3.1	Id	no hits & (original description: Oxidoreductase family protein (AHRD V3.3 *** AT4G17370.1))	2.8816	0	1			1	4
10	Redox homeostasis	solyc02g070110.1.1	Id	Enzyme classification.EC_1 oxidoreductases.EC_1.1 oxidoreductase acting on CH-OH group of donor(50.1.1 : 518.8) & Berberine bridge enzyme-like 28 OS=Arabidopsis thaliana (sp|q9fi21|bbe28_arath : 496.0) (original description: FAD-binding Berberine family protein (AHRD V3.3 *** A0A061GF79_THECC)) &	10.5271	0	1
10.1	Redox homeostasis.reactive oxygen generation	solyc03g034140.3.1	Id	(original description: Quinone reductase family protein (AHRD V3.3 *** AT4G36750.1)) & Probable NAD(P)H dehydrogenase (quinone) FQR1-like 2 OS=Arabidopsis thaliana (sp|o23207|fqrl2_arath : 307.0)	2.22555	0	1
10.1.1	Redox homeostasis.reactive oxygen generation.NADPH-oxidase (Rboh)	solyc05g025683.1.1	Transcript	NADPH-oxidase (Rboh) (original description: Respiratory burst oxidase, putative (AHRD V3.3 *-* B9RR53_RICCO)) &	2.51695	0	1
10.5.7	Redox homeostasis.chloroplast redox homeostasis.atypical thioredoxin (ACHT)	solyc03g115870.3.1	Transcript	atypical thioredoxin (ACHT) (original description: Thioredoxin (AHRD V3.3 *** A0A072UTZ5_MEDTR)) &	-1.75565	1	0

[truncated: 19 more sheets: 11_Phytohormone_action, 12_Chromatin_organisation, 13_Cell_cycle_organisation, 14_DNA_damage_response, 15_RNA_biosynthesis, 16_RNA_processing, 17_Protein_biosynthesis, 18_Protein_modification, 19_Protein_homeostasis, 20_Cytoskeleton_organisation, 21_Cell_wall_organisation, 22_Vesicle_trafficking, 23_Protein_translocation, 24_Solute_transport, 25_Nutrient_uptake, 26_External_stimuli_response, 27_Multi-process_regulation, 35_not_assigned, 50_Enzyme_classification]
