# Supplementary material for: Phytochrome-Mediated Light Perception Affects Fruit Development and Ripening Through Epigenetic Mechanisms
Source: Front Plant Sci. 2022 Apr 28;13:870974. doi: 10.3389/fpls.2022.870974 (PMC9096621; doi:10.3389/fpls.2022.870974)
Supplement: Supplementary file 7 [file Data_Sheet_7.XLSX]

## Sheet: 01_Photosynthesis
Supplementary Table 10. Mapman categories of DEGs between phyA_BK and WT_BK.
BinCode	BinName	id	type	description	FoldChange	down	up			sum_down	sum_up
1.1.1.2.2.2.1	Photosynthesis.photophosphorylation.photosystem II.PS-II complex.oxygen-evolving center (OEC) extrinsic proteins.Viridiplantae-specific components.component OEC23/PsbP	solyc07g044860.3.1	Transcript	component PsbP of PS-II oxygen-evolving center (original description: psbXphotosystem II 23 kDa protein) &	-1.27309	1	0			7	8
1.1.1.6.1.2	Photosynthesis.photophosphorylation.photosystem II.LHC-related protein groups.two-helix LHC-related protein group.protein (SEP2)	solyc04g053130.3.1	Transcript	SEP2 LHC-related protein (original description: Stress enhanced protein 2 (AHRD V3.3 *** K7XKQ9_SOLTU)) &	-1.01817	1	0
1.1.4.2.8	Photosynthesis.photophosphorylation.photosystem I.PS-I complex.component PsaH	solyc06g066640.3.1	Transcript	component PsaH of PS-I complex (original description: Photosystem I reaction center subunit VI (AHRD V3.3 *** B7FN63_MEDTR)) &	4.13535	0	1
1.1.5.2.1	Photosynthesis.photophosphorylation.linear electron flow.ferredoxin-NADP reductase (FNR) activity.ferredoxin-NADP oxidoreductase	solyc02g062130.3.1	Transcript	ferredoxin-NADP oxidoreductase (original description: Ferredoxin--NADP reductase (AHRD V3.3 *** K4B6A3_SOLLC)) &	-2.38777	1	0
1.1.6.1.2	Photosynthesis.photophosphorylation.cyclic electron flow.PGR5/PGRL1 complex.component PGRL1-like	solyc08g007770.3.1	Transcript	component PGRL1-like of cyclic electron flow PGR5/PGRL1 complex (original description: Expansin-like protein (AHRD V3.3 *-* Q0WT83_ARATH)) &	-2.18014	1	0
1.1.6.1.2	Photosynthesis.photophosphorylation.cyclic electron flow.PGR5/PGRL1 complex.component PGRL1-like	solyc08g080050.3.1	Transcript	component PGRL1-like of cyclic electron flow PGR5/PGRL1 complex (original description: PGRL1A transmembrane protein (AHRD V3.3 *** A0A0F7GZP2_9ROSI)) &	-1.17638	1	0
1.1.8.1.3.3	Photosynthesis.photophosphorylation.chlororespiration.NADH dehydrogenase-like (NDH) complex.subcomplex B.component PnsB3/NDF4	solyc08g083360.3.1	Transcript	component PnsB3/NDF4 of NDH subcomplex B (original description: Photosynthetic NDH subcomplex B 3 (AHRD V3.3 *** A0A0F7GXX2_9ROSI)) &	6.83141	0	1
1.1.8.1.4.1	Photosynthesis.photophosphorylation.chlororespiration.NADH dehydrogenase-like (NDH) complex.lumen subcomplex L.component PnsL1	solyc10g054420.2.1	Transcript	component PnsL1 of NDH lumen subcomplex L (original description: PsbP-like protein 2 (AHRD V3.3 *** A0A061FNQ0_THECC)) &	3.12676	0	1
1.1.8.1.6.2.1	Photosynthesis.photophosphorylation.chlororespiration.NADH dehydrogenase-like (NDH) complex.assembly and stabilization.Cpn60 chaperonin heterodimer.subunit alpha	solyc06g075010.3.1	Transcript	subunit alpha of Cpn60 chaperonin complex (original description: Chaperonin 60 alpha subunit (AHRD V3.3 *** Q9ZTV1_CANLI)) &	2.27911	0	1
1.1.8.1.6.3	Photosynthesis.photophosphorylation.chlororespiration.NADH dehydrogenase-like (NDH) complex.assembly and stabilization.assembly factor (CRR1)	solyc03g026210.3.1	Transcript	assembly factor CRR1 involved in NDH complex assembly (original description: Dihydrodipicolinate reductase-like protein (AHRD V3.3 *** A0A0F7GZT6_9ROSI)) &	1.95432	0	1
1.2	Photosynthesis.calvin cycle	solyc01g079470.3.1	Id	(original description: CP12 (AHRD V3.3 *** O24136_TOBAC)) & Calvin cycle protein CP12-1, chloroplastic OS=Arabidopsis thaliana (sp|o22914|cp121_arath : 85.9)	4.41695	0	1
1.3.2	Photosynthesis.photorespiration.glycolate oxidase	solyc10g007600.3.1	Transcript	glycolate oxidase (original description: glycolate oxidase) &	4.14042	0	1
1.4.1.1	Photosynthesis.CAM/C4 photosynthesis.phosphoenolpyruvate (PEP) carboxylase activity.PEP carboxylase	solyc07g062530.3.1	Transcript	PEP carboxylase (original description: phosphoenolpyruvate carboxylase 2) &	1.08708	0	1
1.4.1.2	Photosynthesis.CAM/C4 photosynthesis.phosphoenolpyruvate (PEP) carboxylase activity.PEP carboxylase regulatory kinase	solyc04g009900.3.1	Transcript	PEP carboxylase regulatory kinase (original description: phosphoenolpyruvate carboxylase kinase) &	-1.45647	1	0
1.4.2	Photosynthesis.CAM/C4 photosynthesis.NAD-dependent malate dehydrogenase	solyc01g090710.3.1	Transcript	NAD-dependent malate dehydrogenase (original description: cytosolic malate dehydrogenase) &	-3.67128	1	0

## Sheet: 02_Cellular_respiration
Supplementary Table 10. Mapman categories of DEGs between phyA_BK and WT_BK.
BinCode	BinName	id	type	description	FoldChange	down	up			sum_down	sum_up
2.1.1.1.1	Cellular respiration.glycolysis.cytosolic glycolysis.phosphofructokinase activities.ATP-dependent phosphofructokinase	solyc08g066100.3.1	Transcript	ATP-dependent phosphofructokinase (original description: ATP-dependent 6-phosphofructokinase (AHRD V3.3 *** A0A0V0IM90_SOLCH)) &	2.18818	0	1			3	12
2.1.1.1.1	Cellular respiration.glycolysis.cytosolic glycolysis.phosphofructokinase activities.ATP-dependent phosphofructokinase	solyc05g024230.2.1	Id	no hits & (original description: ATP-dependent 6-phosphofructokinase (AHRD V3.3 *-* A0A0V0IM90_SOLCH))	-2.51465	1	0
2.1.1.4.2	Cellular respiration.glycolysis.cytosolic glycolysis.glyceraldehyde 3-phosphate dehydrogenase activities.NADP-dependent glyceraldehyde 3-phosphate dehydrogenase	solyc07g005390.3.1	Transcript	NADP-dependent glyceraldehyde 3-phosphate dehydrogenase (original description: aldehyde dehydrogenase 11A3 (AHRD V3.3 *** AT2G24270.3)) &	2.83339	0	1
2.1.2.1	Cellular respiration.glycolysis.methylglyoxal degradation.lactoyl-glutathione lyase (GLX1)	solyc11g069040.3.1	Transcript	lactoyl-glutathione lyase (GLX1) (original description: glyoxalase 1) &	0.997152	0	1
2.3.5.1	Cellular respiration.tricarboxylic acid cycle.succinyl-CoA ligase heterodimer.subunit alpha	solyc01g007910.3.1	Transcript	subunit alpha of succinyl-CoA ligase heterodimer (original description: succinyl-CoA ligase alpha 1 subunit) &	0.953696	0	1
2.4	Cellular respiration.oxidative phosphorylation	solyc07g008103.1.1	Id	(original description: Blue copper protein (AHRD V3.3 *-* A0A151SLU0_CAJCA)) & Blue copper protein OS=Pisum sativum (sp|q41001|bcp_pea : 103.0)	-11.1821	1	0
2.4.1	Cellular respiration.oxidative phosphorylation.NADH dehydrogenase complex	solyc02g072160.3.1	Id	no hits & (original description: NAD(P)-binding Rossmann-fold superfamily protein (AHRD V3.3 *** AT4G18810.1))	-1.24369	1	0
2.4.1	Cellular respiration.oxidative phosphorylation.NADH dehydrogenase complex	solyc12g035223.1.1	Id	no hits & (original description: Cytochrome b561 and DOMON domain-containing protein At5g35735 (AHRD V3.3 --* B561P_ARATH))	9.46702	0	1
2.4.1.2.4	Cellular respiration.oxidative phosphorylation.NADH dehydrogenase complex.module Q (electron output) components.component NQO9/TYKY	solyc10g051350.2.1	Transcript	component NQO9/TYKY of NADH dehydrogenase electron output (module Q) (original description: NAD(P)H-quinone oxidoreductase subunit I, chloroplastic (AHRD V3.3 *** NDHI_AETGR)) &	0.897322	0	1
2.4.1.4.1.4	Cellular respiration.oxidative phosphorylation.NADH dehydrogenase complex.non-core components.alpha subcomplex.component NDUFA8	solyc08g007805.1.1	Transcript	component NDUFA8 of NADH dehydrogenase alpha subcomplex (original description: NADH dehydrogenase 1 alpha subcomplex subunit 8 (AHRD V3.3 *-* A0A0K9PKB1_ZOSMR)) &	3.41994	0	1
2.4.2.1.2	Cellular respiration.oxidative phosphorylation.alternative NAD(P)H dehydrogenase activities.type-II NAD(P)H dehydrogenase activities.NAD(P)H dehydrogenase (NDB)	solyc07g054670.3.1	Transcript	NAD(P)H dehydrogenase (NDB) (original description: External alternative NAD(P)H-ubiquinone oxidoreductase B2, mitochondrial (AHRD V3.3 *** NDB2_ARATH)) &	4.46303	0	1
2.4.5.1	Cellular respiration.oxidative phosphorylation.cytochrome c oxidase complex.core components	solyc02g065190.3.1	Id	Geraniol 8-hydroxylase OS=Catharanthus roseus (sp|q8vwz7|c76b6_catro : 631.0) & Enzyme classification.EC_1 oxidoreductases.EC_1.14 oxidoreductase acting on paired donor with incorporation or reduction of molecular oxygen(50.1.13 : 389.2) (original description: Cytochrome P450 (AHRD V3.3 *** Q8H0I6_PETHY)) &	7.32677	0	1
2.4.5.1.4	Cellular respiration.oxidative phosphorylation.cytochrome c oxidase complex.core components.component COX5b	solyc06g067940.3.1	Transcript	component COX5b of cytochrome c oxidase complex (original description: Cytochrome c oxidase subunit 5b (AHRD V3.3 *** Q1EMP4_PLAMJ)) &	1.11678	0	1
2.4.6.1.7	Cellular respiration.oxidative phosphorylation.ATP synthase complex.membrane MF0 subcomplex.subunit ATP6	solyc06g060080.2.1	Transcript	subunit ATP6 of ATP synthase membrane MF0 subcomplex (original description: Mitochondrial ATP synthase 6 kDa subunit (AHRD V3.3 *** A0A0K9PE24_ZOSMR)) &	1.22286	0	1
2.4.6.2.6	Cellular respiration.oxidative phosphorylation.ATP synthase complex.peripheral MF1 subcomplex.subunit epsilon	solyc12g055750.2.1	Transcript	subunit epsilon of ATP synthase peripheral MF1 subcomplex (original description: vacuolar cation/proton exchanger (AHRD V3.3 *** AT1G55720.2)) &	1.26133	0	1

## Sheet: 03_Carbohydrate_metabolism
Supplementary Table 10. Mapman categories of DEGs between phyA_BK and WT_BK.
BinCode	BinName	id	type	description	FoldChange	down	up			sum_down	sum_up
3	Carbohydrate metabolism	solyc01g010310.3.1	Id	(original description: Glucan endo-1,3-beta-glucosidase-like protein (AHRD V3.3 *-* A0A0B2R8X2_GLYSO)) & PLASMODESMATA CALLOSE-BINDING PROTEIN 2 OS=Arabidopsis thaliana (sp|q9sd84|pdcb2_arath : 126.0)	2.03016	0	1			7	38
3	Carbohydrate metabolism	solyc12g055970.2.1	Id	(original description: Endoglucanase (AHRD V3.3 *** Q93WY9_TOBAC)) & Endoglucanase 6 OS=Arabidopsis thaliana (sp|q42059|gun6_arath : 913.0)	9.54412	0	1
3	Carbohydrate metabolism	solyc02g087770.3.1	Id	no hits & (original description: Aldose 1-epimerase (AHRD V3.3 *** K4BBT3_SOLLC))	1.51567	0	1
3	Carbohydrate metabolism	solyc08g065850.1.1	Id	no hits & (original description: Arabinogalactan peptide 14 (AHRD V3.3 -** AGP14_ARATH))	1.70051	0	1
3	Carbohydrate metabolism	solyc02g067690.3.1	Id	UDP-glycosyltransferase 90A1 OS=Arabidopsis thaliana (sp|q9zvx4|u90a1_arath : 489.0) & Enzyme classification.EC_2 transferases.EC_2.4 glycosyltransferase(50.2.4 : 175.1) (original description: Glycosyltransferase (AHRD V3.3 *** M1A9P1_SOLTU)) &	1.32873	0	1
3	Carbohydrate metabolism	solyc12g014010.2.1	Id	UDP-glucose flavonoid 3-O-glucosyltransferase 6 OS=Fragaria ananassa (sp|q2v6k0|ufog6_fraan : 500.0) & Enzyme classification.EC_2 transferases.EC_2.4 glycosyltransferase(50.2.4 : 262.1) (original description: Glycosyltransferase (AHRD V3.3 *** M1B8J3_SOLTU)) &	3.5736	0	1
3	Carbohydrate metabolism	solyc12g098600.1.1	Id	no description available(sp|k4cws6|u75c1_sollc : 449.0) & Enzyme classification.EC_2 transferases.EC_2.4 glycosyltransferase(50.2.4 : 313.9) (original description: Glycosyltransferase (AHRD V3.3 *** K4DHN3_SOLLC)) &	-3.73298	1	0
3	Carbohydrate metabolism	solyc01g005830.3.1	Id	Glucan endo-1,3-beta-glucosidase 4 OS=Arabidopsis thaliana (sp|q94cd8|e134_arath : 162.0) & Enzyme classification.EC_3 hydrolases.EC_3.2 glycosylase(50.3.2 : 83.6) (original description: Glucan endo-1,3-beta-glucosidase, putative (AHRD V3.3 *-* B9T1E3_RICCO)) &	1.43687	0	1
3	Carbohydrate metabolism	solyc01g074030.3.1	Id	Furcatin hydrolase OS=Viburnum furcatum (sp|q75w17|furh_vibfr : 572.0) & Enzyme classification.EC_3 hydrolases.EC_3.2 glycosylase(50.3.2 : 417.8) (original description: Beta-glucosidase 01 (AHRD V3.3 *** B5M9E4_SOLLC)) &	8.68402	0	1
3	Carbohydrate metabolism	solyc12g014420.2.1	Id	Glucan endo-1,3-beta-glucosidase 13 OS=Arabidopsis thaliana (sp|q9fju9|e1313_arath : 382.0) & Enzyme classification.EC_3 hydrolases.EC_3.2 glycosylase(50.3.2 : 330.0) (original description: Glucan endo-1,3-beta-glucosidase, putative (AHRD V3.3 *** B9SU04_RICCO)) &	-3.87239	1	0
3.1	Carbohydrate metabolism.sucrose metabolism	solyc02g088630.3.1	Id	(original description: Hexosyltransferase (AHRD V3.3 *** K4BC18_SOLLC)) & Probable galacturonosyltransferase 13 OS=Arabidopsis thaliana (sp|q0wv13|gautd_arath : 851.0)	3.53925	0	1
3.1	Carbohydrate metabolism.sucrose metabolism	solyc02g089440.3.1	Id	(original description: glycosyltransferase family protein) & Probable galacturonosyltransferase 9 OS=Arabidopsis thaliana (sp|q9fwa4|gaut9_arath : 814.0)	1.44688	0	1
3.1	Carbohydrate metabolism.sucrose metabolism	solyc02g085660.1.1	Id	Anthocyanidin 3-O-glucosyltransferase 5 OS=Manihot esculenta (sp|q40287|ufog5_manes : 494.0) & Enzyme classification.EC_2 transferases.EC_2.4 glycosyltransferase(50.2.4 : 347.8) (original description: Glycosyltransferase (AHRD V3.3 *** K4BB77_SOLLC)) &	2.70599	0	1
3.1.2	Carbohydrate metabolism.sucrose metabolism.biosynthesis	solyc01g086640.2.1	Id	(original description: LOW QUALITY:O-fucosyltransferase family protein (AHRD V3.3 *** AT2G44500.1)) & O-fucosyltransferase 20 OS=Arabidopsis thaliana (sp|o64884|oft20_arath : 663.0)	2.23178	0	1
3.1.4.1	Carbohydrate metabolism.sucrose metabolism.degradation.invertase activities	solyc02g085310.3.1	Id	no hits & (original description: plant invertase/pectin methylesterase inhibitor superfamily protein (AHRD V3.3 --* AT3G17227.1))	1.21212	0	1
3.1.4.1.1	Carbohydrate metabolism.sucrose metabolism.degradation.invertase activities.acid beta-fructofuranosidase (CWIN)	solyc10g083290.4.1	Transcript	acid beta-fructofuranosidase (CWIN) (original description: symbol=Lin6) &	10.1617	0	1
3.1.4.1.2	Carbohydrate metabolism.sucrose metabolism.degradation.invertase activities.acid beta-fructofuranosidase (VIN)	solyc03g083910.4.1	Transcript	acid beta-fructofuranosidase (VIN) (original description: symbol=TIV1) &	-2.21414	1	0
3.1.4.1.2	Carbohydrate metabolism.sucrose metabolism.degradation.invertase activities.acid beta-fructofuranosidase (VIN)	solyc08g079080.4.1	Transcript	acid beta-fructofuranosidase (VIN) (original description: symbol=lin9) &	5.11762	0	1
3.1.4.2	Carbohydrate metabolism.sucrose metabolism.degradation.sucrose synthase	solyc02g081300.3.1	Transcript	sucrose synthase (original description: Sucrose synthase (AHRD V3.3 *** A0A0C5DIW2_CAMSI)) &	-1.56816	1	0
3.1.4.2	Carbohydrate metabolism.sucrose metabolism.degradation.sucrose synthase	solyc12g009300.3.1	Transcript	sucrose synthase (original description: sucrose synthase (SuSy)) &	2.00464	0	1
3.1.4.3	Carbohydrate metabolism.sucrose metabolism.degradation.hexokinase	solyc04g081400.3.1	Transcript	hexokinase (original description: Phosphotransferase (AHRD V3.3 *** Q4PS96_SOLLC)) &	1.44893	0	1
3.2.3.3.1.2	Carbohydrate metabolism.starch metabolism.degradation.hydrolysis and phosphorolysis.amylase activities.beta amylase	solyc08g007130.3.1	Transcript	beta amylase (original description: Beta-amylase (AHRD V3.3 *** K4CIK0_SOLLC)) &	-4.70835	1	0
3.2.3.3.1.2	Carbohydrate metabolism.starch metabolism.degradation.hydrolysis and phosphorolysis.amylase activities.beta amylase	solyc09g091030.3.1	Transcript	beta amylase (original description: Beta-amylase 1) &	1.22768	0	1
3.2.3.3.3	Carbohydrate metabolism.starch metabolism.degradation.hydrolysis and phosphorolysis.plastidial glucanotransferase	solyc04g053120.3.1	Transcript	plastidial glucanotransferase (original description: 4-alpha-glucanotransferase (AHRD V3.3 *** K4BSG9_SOLLC)) &	1.09965	0	1
3.2.3.3.4	Carbohydrate metabolism.starch metabolism.degradation.hydrolysis and phosphorolysis.plastidial alpha-glucan phosphorylase	solyc03g065340.3.1	Transcript	plastidial alpha-glucan phosphorylase (original description: Alpha-1,4 glucan phosphorylase (AHRD V3.3 *** K4BHG4_SOLLC)) &	1.65208	0	1
3.2.3.3.4	Carbohydrate metabolism.starch metabolism.degradation.hydrolysis and phosphorolysis.plastidial alpha-glucan phosphorylase	solyc05g012510.3.1	Transcript	plastidial alpha-glucan phosphorylase (original description: Alpha-1,4 glucan phosphorylase (AHRD V3.3 *** K4BXX3_SOLLC)) &	1.45612	0	1
3.3.1	Carbohydrate metabolism.trehalose metabolism.trehalose-6-phosphate synthase	solyc07g062140.3.1	Transcript	trehalose-6-phosphate synthase (original description: trehalose-phosphate synthase 1) &	1.25314	0	1
3.3.2	Carbohydrate metabolism.trehalose metabolism.trehalose-6-phosphate phosphatase	solyc03g083960.3.1	Transcript	trehalose-6-phosphate phosphatase (original description: Trehalose 6-phosphate phosphatase (AHRD V3.3 *** K4BIH1_SOLLC)) &	4.52443	0	1
3.3.2	Carbohydrate metabolism.trehalose metabolism.trehalose-6-phosphate phosphatase	solyc02g072150.3.1	Id	Probable alpha,alpha-trehalose-phosphate synthase [UDP-forming] 7 OS=Arabidopsis thaliana (sp|q9lmi0|tps7_arath : 1330.0) & Enzyme classification.EC_2 transferases.EC_2.4 glycosyltransferase(50.2.4 : 538.3) (original description: Trehalose-6-phosphate synthase, putative (AHRD V3.3 *** B9S8D6_RICCO)) &	2.76018	0	1
3.6.1	Carbohydrate metabolism.mannose metabolism.phosphomannose isomerase	solyc02g063220.3.1	Transcript	phosphomannose isomerase (original description: Mannose-6-phosphate isomerase (AHRD V3.3 *** K4B6K7_SOLLC)) &	1.3081	0	1
3.9.1.3	Carbohydrate metabolism.oxidative pentose phosphate pathway.oxidative phase.6-phosphogluconate dehydrogenase	solyc04g005160.2.1	Transcript	6-phosphogluconate dehydrogenase (original description: 6-phosphogluconate dehydrogenase, decarboxylating (AHRD V3.3 *** A0A0K1P904_SOLCH)) &	1.36714	0	1
3.10.1	Carbohydrate metabolism.gluconeogenesis.phosphoenolpyruvate carboxykinase	solyc04g076880.3.1	Transcript	phosphoenolpyruvate carboxykinase (original description: phosphoenolpyruvate carboxykinase) &	-1.0913	1	0
3.11.1.2	Carbohydrate metabolism.fermentation.alcoholic fermentation.alcohol dehydrogenase	solyc06g059740.3.1	Transcript	alcohol dehydrogenase (original description: Alcohol dehydrogenase (AHRD V3.3 *** ADH_MALDO)) &	-1.00905	1	0
3.12.4	Carbohydrate metabolism.plastidial glycolysis.glyceraldehyde 3-phosphate dehydrogenase	solyc10g005510.3.1	Transcript	glyceraldehyde 3-phosphate dehydrogenase (original description: Glyceraldehyde-3-phosphate dehydrogenase (AHRD V3.3 *** K4CX83_SOLLC)) &	1.65591	0	1
3.13.2.1.1	Carbohydrate metabolism.nucleotide sugar biosynthesis.GDP-L-fucose biosynthesis.de novo biosynthesis.GDP-D-mannose 4,6-dehydratase (MUR1)	solyc02g084210.1.1	Transcript	GDP-D-mannose 4,6-dehydratase (MUR1) (original description: GDP-mannose 4,6 dehydratase 1 (AHRD V3.3 *** GMD1_ARATH)) &	6.15345	0	1
3.13.3.1	Carbohydrate metabolism.nucleotide sugar biosynthesis.UDP-D-glucuronic acid biosynthesis.UDP-D-glucose 6-dehydrogenase	solyc02g088690.3.1	Transcript	UDP-D-glucose 6-dehydrogenase (original description: UDP-glucose 6-dehydrogenase family protein (AHRD V3.3 *** AT3G29360.2)) &	2.08398	0	1
3.13.3.1	Carbohydrate metabolism.nucleotide sugar biosynthesis.UDP-D-glucuronic acid biosynthesis.UDP-D-glucose 6-dehydrogenase	solyc06g069550.1.1	Transcript	UDP-D-glucose 6-dehydrogenase (original description: UDP-glucose 6-dehydrogenase family protein (AHRD V3.3 *** AT3G29360.2)) &	3.78458	0	1
3.13.3.2.1	Carbohydrate metabolism.nucleotide sugar biosynthesis.UDP-D-glucuronic acid biosynthesis.myo-inositol oxidation pathway (MIOP).myo-inositol-1-phosphate synthase	solyc04g054740.3.1	Transcript	myo-inositol-1-phosphate synthase (original description: myo-inositol-1-phosphate synthase) &	1.72507	0	1
3.13.4.1	Carbohydrate metabolism.nucleotide sugar biosynthesis.UDP-D-galacturonic acid biosynthesis.UDP-D-glucuronic acid 4-epimerase	solyc07g006220.2.1	Transcript	UDP-D-glucuronic acid 4-epimerase (original description: UDP-glucuronate 4-epimerase 4 (AHRD V3.3 *** GAE4_ARATH)) &	3.06601	0	1
3.13.4.1	Carbohydrate metabolism.nucleotide sugar biosynthesis.UDP-D-galacturonic acid biosynthesis.UDP-D-glucuronic acid 4-epimerase	solyc12g010540.1.1	Transcript	UDP-D-glucuronic acid 4-epimerase (original description: UDP-glucuronate 4-epimerase 4 (AHRD V3.3 *** GAE4_ARATH)) &	2.09892	0	1
3.13.5.1	Carbohydrate metabolism.nucleotide sugar biosynthesis.UDP-D-xylose biosynthesis.UDP-D-glucuronic acid decarboxylase	solyc05g054590.3.1	Transcript	UDP-D-glucuronic acid decarboxylase (original description: UDP-glucuronate decarboxylase 1 (AHRD V3.3 *** Q6IVK5_TOBAC)) &	3.7188	0	1
3.13.5.2	Carbohydrate metabolism.nucleotide sugar biosynthesis.UDP-D-xylose biosynthesis.UDP-D-apiose / UPD-D-xylose synthetase	solyc06g074670.3.1	Transcript	UDP-D-apiose / UPD-D-xylose synthetase (original description: UDP-apiose/xylose synthase (AHRD V3.3 *** Q2I2N3_SOLTU)) &	4.19323	0	1
3.13.6.1	Carbohydrate metabolism.nucleotide sugar biosynthesis.UDP-L-rhamnose biosynthesis.UDP-L-rhamnose synthase	solyc08g080140.3.1	Transcript	UDP-L-rhamnose synthase (original description: 3,5-epimerase/4-reductase (AHRD V3.3 *** I3SMF8_MEDTR)) &	1.82449	0	1
3.13.8	Carbohydrate metabolism.nucleotide sugar biosynthesis.UDP-D-glucose 4-epimerase	solyc12g055930.2.1	Transcript	UDP-D-glucose 4-epimerase (original description: UDP-glucose 4-epimerase (AHRD V3.3 *** Q6XZA0_SOLTU)) &	1.43465	0	1
3.13.9.1.4	Carbohydrate metabolism.nucleotide sugar biosynthesis.UDP-N-acetylglucosamine biosynthesis.de novo biosynthesis.UDP-N-acetylglucosamine pyrophosphorylase	solyc02g068530.3.1	Transcript	UDP-N-acetylglucosamine pyrophosphorylase (original description: N-acetylglucosamine-1-phosphate uridylyltransferase 1 (AHRD V3.3 *** AT1G31070.2)) &	1.15041	0	1

## Sheet: 04_Amino_acid_metabolism
Supplementary Table 10. Mapman categories of DEGs between phyA_BK and WT_BK.
BinCode	BinName	id	type	description	FoldChange	down	up			sum_down	sum_up
4	Amino acid metabolism	solyc08g068620.2.1	Id	(original description: Decarboxylase family protein IPR002129 Pyridoxal phosphate-dependent decarboxylase) & Histidine decarboxylase OS=Solanum lycopersicum (sp|p54772|dchs_sollc : 503.0)	4.06419	0	1			1	24
4	Amino acid metabolism	solyc08g068630.3.1	Id	(original description: Decarboxylase family protein IPR002129 Pyridoxal phosphate-dependent decarboxylase) & Histidine decarboxylase OS=Solanum lycopersicum (sp|p54772|dchs_sollc : 585.0)	5.27803	0	1
4	Amino acid metabolism	solyc08g068660.1.1	Id	(original description: Histidine decarboxylase (AHRD V3.3 *-* W0KR26_TOBAC)) & Histidine decarboxylase OS=Solanum lycopersicum (sp|p54772|dchs_sollc : 115.0)	2.1583	0	1
4	Amino acid metabolism	solyc08g068770.2.1	Id	(original description: N-hydroxycinnamoyl-CoA:tyramine N-hydroxycinnamoyl transferase) & Tyramine N-feruloyltransferase 4/11 OS=Nicotiana tabacum (sp|q9smb8|tht11_tobac : 344.0)	3.36493	0	1
4.1	Amino acid metabolism.biosynthesis	solyc02g083360.1.1	Id	no hits & (original description: methionine-S-oxide reductase (AHRD V3.3 *** AT2G17705.1))	1.22489	0	1
4.1.1	Amino acid metabolism.biosynthesis.glutamate family	solyc08g068690.1.1	Id	(original description: Tyramine n-hydroxycinnamoyl transferase (AHRD V3.3 *** Q5D8C0_CAPAN)) & Tyramine N-feruloyltransferase 4/11 OS=Nicotiana tabacum (sp|q9smb8|tht11_tobac : 338.0)	3.03578	0	1
4.1.1	Amino acid metabolism.biosynthesis.glutamate family	solyc08g068700.1.1	Id	(original description: Tyramine n-hydroxycinnamoyl transferase (AHRD V3.3 *** Q5D8C0_CAPAN)) & Tyramine N-feruloyltransferase 4/11 OS=Nicotiana tabacum (sp|q9smb8|tht11_tobac : 334.0)	2.08198	0	1
4.1.1	Amino acid metabolism.biosynthesis.glutamate family	solyc08g068730.1.1	Id	(original description: Tyramine n-hydroxycinnamoyl transferase (AHRD V3.3 *** Q5D8C0_CAPAN)) & Tyramine N-feruloyltransferase 4/11 OS=Nicotiana tabacum (sp|q9smb8|tht11_tobac : 351.0)	4.09409	0	1
4.1.1.1.3.1	Amino acid metabolism.biosynthesis.glutamate family.glutamate-derived amino acids.gamma-aminobutyrate (GABA).glutamate decarboxylase	solyc04g025530.3.1	Transcript	glutamate decarboxylase (original description: glutamate decarboxylase (AHRD V3.3 *** AT5G17330.1)) &	9.24375	0	1
4.1.2.1	Amino acid metabolism.biosynthesis.aspartate family.asparagine	solyc12g014270.2.1	Id	(original description: Peptide-N4-(N-acetyl-beta-glucosaminyl)asparagine amidase A (AHRD V3.3 *** PNAA_PRUDU)) & Peptide-N4-(N-acetyl-beta-glucosaminyl)asparagine amidase A OS=Prunus dulcis (sp|p81898|pnaa_prudu : 706.0)	6.67557	0	1
4.1.2.2.8.2	Amino acid metabolism.biosynthesis.aspartate family.aspartate-derived amino acids.isoleucine.methionine gamma-lyase	solyc08g083110.3.1	Id	(original description: Cystathionine gamma-synthase, putative (AHRD V3.3 *-* B9RYU1_RICCO)) & Methionine gamma-lyase OS=Arabidopsis thaliana (sp|q9sgu9|mgl_arath : 196.0)	1.67777	0	1
4.1.4.1.1	Amino acid metabolism.biosynthesis.serine family.non-photorespiratory serine.phosphoglycerate dehydrogenase	solyc03g123830.3.1	Transcript	phosphoglycerate dehydrogenase (original description: D-3-phosphoglycerate dehydrogenase (AHRD V3.3 *** K4BN81_SOLLC)) &	2.00637	0	1
4.1.4.2.2	Amino acid metabolism.biosynthesis.serine family.cysteine.O-acetylserine sulfydrylase	solyc09g082060.3.1	Transcript	O-acetylserine sulfydrylase (original description: Cysteine synthase (AHRD V3.3 *** CYSK_SOLTU)) &	1.42852	0	1
4.1.5.2.3	Amino acid metabolism.biosynthesis.shikimate family.phenylalanine and tyrosine.arogenate dehydrogenase (ADH)	solyc06g050630.3.1	Transcript	arogenate dehydrogenase (ADH) (original description: arogenate dehydrogenase (AHRD V3.3 *-* AT5G34930.3)) &	3.76434	0	1
4.1.5.2.3	Amino acid metabolism.biosynthesis.shikimate family.phenylalanine and tyrosine.arogenate dehydrogenase (ADH)	solyc07g007590.1.1	Transcript	arogenate dehydrogenase (ADH) (original description: Arogenate dehydrogenase 1 (AHRD V3.3 *** F1BPV5_SOLPN)) &	1.38056	0	1
4.1.5.2.4	Amino acid metabolism.biosynthesis.shikimate family.phenylalanine and tyrosine.arogenate dehydratase (ADT)	solyc02g080620.3.1	Transcript	arogenate dehydratase (ADT) (original description: Arogenate dehydratase (AHRD V3.3 *** K4B9T3_SOLLC)) &	5.0953	0	1
4.1.5.2.4	Amino acid metabolism.biosynthesis.shikimate family.phenylalanine and tyrosine.arogenate dehydratase (ADT)	solyc06g074530.1.1	Transcript	arogenate dehydratase (ADT) (original description: Arogenate dehydratase (AHRD V3.3 *** K4C9H1_SOLLC)) &	3.65116	0	1
4.1.5.3	Amino acid metabolism.biosynthesis.shikimate family.tryptophan	solyc12g096190.2.1	Id	(original description: Tryptophan synthase-related (AHRD V3.3 *** A0A0A9M6W8_ARUDO)) & Tryptophan synthase beta chain 2, chloroplastic OS=Arabidopsis thaliana (sp|p25269|trbp2_arath : 120.0)	0.943101	0	1
4.1.5.3.3	Amino acid metabolism.biosynthesis.shikimate family.tryptophan.phosphoribosyanthranilate isomerase	solyc06g051410.3.1	Transcript	phosphoribosyanthranilate isomerase (original description: Phosphoribosylanthranilate isomerase (AHRD V3.3 *** F1BPW4_SOLPN)) &	1.97187	0	1
4.2	Amino acid metabolism.degradation	solyc08g082370.1.1	Id	no hits & (original description: LOW QUALITY:calpain-type cysteine protease family (AHRD V3.3 --* AT1G55350.6))	5.52689	0	1
4.2.2.1	Amino acid metabolism.degradation.gamma-aminobutyrate (GABA).gamma-aminobutyric acid pyruvate transaminase	solyc12g006470.2.1	Transcript	GABA pyruvate transaminase (original description: viroid RNA-binding protein) &	4.57614	0	1
4.2.7.5.1.1	Amino acid metabolism.degradation.branched-chain amino acid.leucine.methylcrotonoyl-CoA carboxylase heterodimer.subunit alpha	solyc09g065540.3.1	Transcript	subunit alpha of methylcrotonoyl-CoA carboxylase complex (original description: biotin-binding protein) &	-0.88846	1	0
4.2.8	Amino acid metabolism.degradation.aromatic amino acid	solyc08g068600.3.1	Id	(original description: Aromatic amino acid decarboxylase 1B (AHRD V3.3 *** Q1KSC5_SOLLC)) & Histidine decarboxylase OS=Solanum lycopersicum (sp|p54772|dchs_sollc : 590.0)	3.76614	0	1
4.2.8	Amino acid metabolism.degradation.aromatic amino acid	solyc08g068680.3.1	Id	(original description: aromatic amino acid decarboxylase 1A) & Histidine decarboxylase OS=Solanum lycopersicum (sp|p54772|dchs_sollc : 590.0)	4.94619	0	1
4.2.8.1	Amino acid metabolism.degradation.aromatic amino acid.aromatic-amino-acid aminotransferase	solyc03g120450.3.1	Transcript	aromatic-amino-acid aminotransferase (original description: Aspartate aminotransferase (AHRD V3.3 *** W9S4V9_9ROSA)) &	2.06703	0	1

## Sheet: 05_Lipid_metabolism
Supplementary Table 10. Mapman categories of DEGs between phyA_BK and WT_BK.
BinCode	BinName	id	type	description	FoldChange	down	up			sum_down	sum_up
5	Lipid metabolism	solyc12g099430.2.1	Id	no hits & (original description: Epoxide hydrolase (AHRD V3.3 *** A0A072UTA2_MEDTR))	1.05622	0	1			7	52
5	Lipid metabolism	solyc08g029000.3.1	Id	Probable linoleate 9S-lipoxygenase 5 OS=Solanum tuberosum (sp|q43191|lox15_soltu : 1687.0) & Enzyme classification.EC_1 oxidoreductases.EC_1.13 oxidoreductase acting on single donor with incorporation of molecular oxygen (oxygenase)(50.1.12 : 1452.5) (original description: Lipoxygenase (AHRD V3.3 *** Q43800_TOBAC)) &	12.7321	0	1
5.1	Lipid metabolism.fatty acid biosynthesis	solyc01g009870.3.1	Id	(original description: Glycerophosphodiester phosphodiesterase, putative (AHRD V3.3 *** B9RM92_RICCO)) & Glycerophosphodiester phosphodiesterase GDPD3 OS=Arabidopsis thaliana (sp|q680a6|gdpd3_arath : 374.0)	3.84486	0	1
5.1	Lipid metabolism.fatty acid biosynthesis	solyc03g045140.3.1	Id	(original description: Cyclopropane-fatty-acyl-phospholipid synthase (AHRD V3.3 *** AT3G23530.1)) & Probable (S)-tetrahydroprotoberberine N-methyltransferase 2 OS=Papaver bracteatum (sp|c3sbu4|tnmt2_papbr : 94.7)	5.58833	0	1
5.1.1.2.1	Lipid metabolism.fatty acid biosynthesis.citrate shuttle.ATP-dependent citrate lyase heterodimer.alpha chain	solyc05g005160.3.1	Transcript	alpha chain of ATP-dependent citrate lyase complex (original description: ATP-citrate synthase, putative (AHRD V3.3 *** B9SHC9_RICCO)) &	2.86116	0	1
5.1.1.2.2	Lipid metabolism.fatty acid biosynthesis.citrate shuttle.ATP-dependent citrate lyase heterodimer.beta chain	solyc12g099260.2.1	Transcript	beta chain of ATP-dependent citrate lyase complex (original description: ATP-citrate synthase, putative (AHRD V3.3 *** B9RZR0_RICCO)) &	4.10444	0	1
5.1.1.4	Lipid metabolism.fatty acid biosynthesis.citrate shuttle.cytosolic NADP-dependent malic enzyme	solyc03g120990.3.1	Transcript	cytosolic NADP-dependent malic enzyme (original description: Malic enzyme (AHRD V3.3 *** M0ZRW2_SOLTU)) &	4.55859	0	1
5.1.4.2.1	Lipid metabolism.fatty acid biosynthesis.plastidial fatty acid synthase (ptFAS) system.ketoacyl-ACP synthase activities.ketoacyl-ACP synthase I	solyc08g082620.3.1	Transcript	ketoacyl-ACP synthase I (original description: 3-oxoacyl-[acyl-carrier-protein] synthase (AHRD V3.3 *** O82520_CAPCH)) &	6.89791	0	1
5.1.4.5	Lipid metabolism.fatty acid biosynthesis.plastidial fatty acid synthase (ptFAS) system.enoyl-ACP reductase (MOD1)	solyc10g078740.2.1	Transcript	enoyl-ACP reductase (original description: Enoyl reductase (AHRD V3.3 *** P93062_BRANA)) &	2.9926	0	1
5.1.7.3	Lipid metabolism.fatty acid biosynthesis.fatty acid desaturation.omega-3/omega-6 fatty acid desaturase (FAD2/3/6-8)	solyc03g058430.2.1	Transcript	omega-3/omega-6 fatty acid desaturase (original description: Fatty acid desaturase (AHRD V3.3 *** M4QSE6_9ERIC)) &	8.08181	0	1
5.1.7.3	Lipid metabolism.fatty acid biosynthesis.fatty acid desaturation.omega-3/omega-6 fatty acid desaturase (FAD2/3/6-8)	solyc04g040130.1.1	Transcript	omega-3/omega-6 fatty acid desaturase (original description: Fatty acid desaturase (AHRD V3.3 *** I3RV99_9ERIC)) &	12.8843	0	1
5.1.7.3	Lipid metabolism.fatty acid biosynthesis.fatty acid desaturation.omega-3/omega-6 fatty acid desaturase (FAD2/3/6-8)	solyc06g051400.3.1	Transcript	omega-3/omega-6 fatty acid desaturase (original description: Omega-3 fatty acid desaturase (AHRD V3.3 *** Q7X7I9_SOLLC)) &	1.67244	0	1
5.1.7.3	Lipid metabolism.fatty acid biosynthesis.fatty acid desaturation.omega-3/omega-6 fatty acid desaturase (FAD2/3/6-8)	solyc12g044950.2.1	Transcript	omega-3/omega-6 fatty acid desaturase (original description: lipid desaturase) &	5.66445	0	1
5.1.7.3	Lipid metabolism.fatty acid biosynthesis.fatty acid desaturation.omega-3/omega-6 fatty acid desaturase (FAD2/3/6-8)	solyc12g100250.2.1	Transcript	omega-3/omega-6 fatty acid desaturase (original description: Fatty acid desaturase (AHRD V3.3 *** E5D7U7_9GENT)) &	7.5177	0	1
5.1.7.3	Lipid metabolism.fatty acid biosynthesis.fatty acid desaturation.omega-3/omega-6 fatty acid desaturase (FAD2/3/6-8)	solyc12g100260.1.1	Transcript	omega-3/omega-6 fatty acid desaturase (original description: Fatty acid desaturase (AHRD V3.3 *-* B3SP99_CAPAN)) &	8.48895	0	1
5.2.1.1.2	Lipid metabolism.glycerolipid biosynthesis.phosphatidate.plastidial phosphatidate biosynthesis.glycerol-3-phosphate acyltransferase (ATS1)	solyc12g011100.2.1	Id	no hits & (original description: glycerol-3-phosphate acyltransferase 3 (AHRD V3.3 --* AT4G01950.2))	8.58969	0	1
5.2.1.2.4	Lipid metabolism.glycerolipid biosynthesis.phosphatidate.endoplasmic reticulum phosphatidate biosynthesis.lysophosphatidate acyltransferase (LPAT)	solyc04g079880.3.1	Transcript	1-acylglycerol-3-phosphate O-acyltransferase (original description: 1-acyl-sn-glycerol-3-phosphate acyltransferase (AHRD V3.3 *** B2LWM4_RICCO)) &	4.02792	0	1
5.2.1.2.4	Lipid metabolism.glycerolipid biosynthesis.phosphatidate.endoplasmic reticulum phosphatidate biosynthesis.lysophosphatidate acyltransferase (LPAT)	solyc10g079110.2.1	Transcript	1-acylglycerol-3-phosphate O-acyltransferase (original description: 1-acyl-sn-glycerol-3-phosphate acyltransferase (AHRD V3.3 *** Q2Z1Y8_PRUMU)) &	3.62908	0	1
5.2.1.4	Lipid metabolism.glycerolipid biosynthesis.phosphatidate.diacylglycerol kinase	solyc06g009270.3.1	Transcript	diacylglycerol kinase (original description: Diacylglycerol kinase (AHRD V3.3 *** K4C3V7_SOLLC)) &	1.62462	0	1
5.2.1.4	Lipid metabolism.glycerolipid biosynthesis.phosphatidate.diacylglycerol kinase	solyc07g054830.3.1	Transcript	diacylglycerol kinase (original description: diacylglycerol kinase) &	1.71667	0	1
5.2.2.1	Lipid metabolism.glycerolipid biosynthesis.diacylglycerol.phosphatidate phosphatase (LPP-alpha)	solyc02g086370.3.1	Transcript	phosphatidate phosphatase (LPP-alpha) (original description: Lipid phosphate phosphatase-like protein (AHRD V3.3 *** I3SWU2_MEDTR)) &	1.62303	0	1
5.2.2.1	Lipid metabolism.glycerolipid biosynthesis.diacylglycerol.phosphatidate phosphatase (LPP-alpha)	solyc05g008815.1.1	Transcript	phosphatidate phosphatase (LPP-alpha) (original description: Lipid phosphate phosphatase-like protein (AHRD V3.3 *** A0A072U232_MEDTR)) &	2.6175	0	1
5.2.4.5.1	Lipid metabolism.glycerolipid biosynthesis.phosphatidylcholine.choline homeostasis.phosphocholine phosphatase	solyc06g062540.3.1	Transcript	phosphocholine phosphatase (original description: putative acid phosphatase) &	-2.19176	1	0
5.2.4.5.1	Lipid metabolism.glycerolipid biosynthesis.phosphatidylcholine.choline homeostasis.phosphocholine phosphatase	solyc06g062550.4.1	Transcript	phosphocholine phosphatase (original description: LES459817 putative phosphatase 14A) &	-4.17982	1	0
5.2.4.5.1	Lipid metabolism.glycerolipid biosynthesis.phosphatidylcholine.choline homeostasis.phosphocholine phosphatase	solyc07g021710.3.1	Transcript	phosphocholine phosphatase (original description: Inorganic pyrophosphatase 2 (AHRD V3.3 *** A0A199VVZ6_ANACO)) &	2.63011	0	1
5.3.2	Lipid metabolism.galactolipid and sulfolipid biosynthesis.monogalactosyldiacylglycerol synthase (MGD)	solyc07g007620.3.1	Transcript	monogalactosyldiacylglycerol synthase (original description: Monogalactosyldiacylglycerol synthase (AHRD V3.3 *** A0A087G8S7_ARAAL)) &	-2.52282	1	0
5.4.5	Lipid metabolism.sphingolipid biosynthesis.ceramide synthase	solyc03g113060.3.1	Transcript	ceramide synthase (original description: ABC transporter A family protein (AHRD V3.3 *** A0A072UUA7_MEDTR)) &	1.36944	0	1
5.4.8	Lipid metabolism.sphingolipid biosynthesis.sphingoid long-chain base phosphate phosphatase	solyc03g051970.3.1	Transcript	sphingoid long-chain base phosphate phosphatase (original description: Dihydrosphingosine 1-phosphate phosphatase (AHRD V3.3 *** W9S3H5_9ROSA)) &	1.02515	0	1
5.4.9	Lipid metabolism.sphingolipid biosynthesis.delta-8 sphingolipid desaturase	solyc08g063090.2.1	Transcript	delta-8 sphingolipid desaturase (original description: Sphingolipid delta-8 desaturase (AHRD V3.3 *** A4GK73_TOBAC)) &	3.35614	0	1
5.4.9	Lipid metabolism.sphingolipid biosynthesis.delta-8 sphingolipid desaturase	solyc10g011810.3.1	Transcript	delta-8 sphingolipid desaturase (original description: Fatty acid/sphingolipid desaturase (AHRD V3.3 *-* AT2G46210.1)) &	2.78168	0	1
5.4.9	Lipid metabolism.sphingolipid biosynthesis.delta-8 sphingolipid desaturase	solyc10g011820.3.1	Transcript	delta-8 sphingolipid desaturase (original description: Fatty acid/sphingolipid desaturase (AHRD V3.3 *** AT2G46210.1)) &	2.87245	0	1
5.4.10	Lipid metabolism.sphingolipid biosynthesis.sphingolipid fatty acid 2-hydroxylase	solyc02g022890.2.1	Transcript	sphingolipid fatty acid 2-hydroxylase (original description: Fatty acid 2-hydroxylase (AHRD V3.3 *** A0A1D1ZHT2_9ARAE)) &	6.81604	0	1
5.4.13.1	Lipid metabolism.sphingolipid biosynthesis.glycosylinositol phosphorylceramide (GIPC) biosynthesis.inositol phosphorylceramide synthase (IPCS)	solyc09g011740.3.1	Transcript	inositol phosphorylceramide synthase (IPCS) (original description: Phosphatidylinositol:ceramide inositolphosphotransferase (AHRD V3.3 *** IPCS_ORYSI)) &	1.67363	0	1
5.4.13.1	Lipid metabolism.sphingolipid biosynthesis.glycosylinositol phosphorylceramide (GIPC) biosynthesis.inositol phosphorylceramide synthase (IPCS)	solyc10g084990.2.1	Transcript	inositol phosphorylceramide synthase (IPCS) (original description: Phosphatidylinositol:ceramide inositolphosphotransferase (AHRD V3.3 *** IPCS_ORYSI)) &	1.36176	0	1
5.5	Lipid metabolism.phytosterol biosynthesis	solyc01g079410.3.1	Id	no hits & (original description: Calcium-dependent phosphotriesterase superfamily protein (AHRD V3.3 *** A0A061DRE0_THECC))	3.71698	0	1
5.5.1.1	Lipid metabolism.phytosterol biosynthesis.campesterol.sterol C-24 methyltransferase	solyc01g111830.3.1	Transcript	sterol C-24 methyltransferase (original description: Methyltransferase (AHRD V3.3 *** K4B445_SOLLC)) &	1.65753	0	1
5.5.1.1	Lipid metabolism.phytosterol biosynthesis.campesterol.sterol C-24 methyltransferase	solyc12g009110.2.1	Id	Acetylserotonin O-methyltransferase OS=Arabidopsis thaliana (sp|q9t003|asmt_arath : 337.0) & Enzyme classification.EC_2 transferases.EC_2.1 transferase transferring one-carbon group(50.2.1 : 186.6) (original description: O-methyltransferase, putative (AHRD V3.3 *** B9SUX6_RICCO)) &	6.10046	0	1
5.5.2.3.2	Lipid metabolism.phytosterol biosynthesis.phytosterol conjugation.phytosterol esterification.acyl-CoA:cholesterol acyltransferase	solyc07g065060.1.1	Transcript	acyl-CoA:cholesterol acyltransferase (original description: MBOAT (Membrane bound O-acyl transferase) family protein, putative (AHRD V3.3 *** G7K4B1_MEDTR)) &	3.23032	0	1
5.7.1	Lipid metabolism.lipid degradation.triacylglycerol lipase activities	solyc12g017460.1.1	Id	(original description: GDSL esterase/lipase (AHRD V3.3 *** A0A199UFA2_ANACO)) & Acetylajmalan esterase OS=Rauvolfia serpentina (sp|q3mky2|aae_rause : 306.0)	7.16316	0	1
5.7.1.2.2	Lipid metabolism.lipid degradation.triacylglycerol lipase activities.diacyl-/triacylglycerol lipase activities.lipase (LIP)	solyc03g005020.3.1	Transcript	lipase (LIP) (original description: Lipase (AHRD V3.3 *** K4BDS6_SOLLC)) &	1.98208	0	1
5.7.2.1.1	Lipid metabolism.lipid degradation.phospholipase activities.phospholipase A1 activities.phospholipase A1 (PC-PLA1)	solyc08g078090.1.1	Transcript	phospholipase A1 (PC-PLA1) (original description: Alpha/beta-Hydrolases superfamily protein (AHRD V3.3 *** A0A061GB30_THECC)) &	3.12523	0	1
5.7.2.1.1	Lipid metabolism.lipid degradation.phospholipase activities.phospholipase A1 activities.phospholipase A1 (PC-PLA1)	solyc09g065890.3.1	Transcript	phospholipase A1 (PC-PLA1) (original description: Alpha/beta-Hydrolases superfamily protein (AHRD V3.3 *** A0A061DP20_THECC)) &	2.29805	0	1
5.7.2.1.1	Lipid metabolism.lipid degradation.phospholipase activities.phospholipase A1 activities.phospholipase A1 (PC-PLA1)	solyc11g065530.1.1	Transcript	phospholipase A1 (PC-PLA1) (original description: alpha/beta-Hydrolases superfamily protein (AHRD V3.3 *** AT1G51440.1)) &	1.355	0	1
5.7.2.2.3	Lipid metabolism.lipid degradation.phospholipase activities.phospholipase A2 activities.phospholipase A2 (pPLA2-II)	solyc02g090490.3.1	Transcript	phospholipase A2 (pPLA2-II) (original description: Patatin (AHRD V3.3 *** K4BCJ8_SOLLC)) &	4.66526	0	1
5.7.2.2.3	Lipid metabolism.lipid degradation.phospholipase activities.phospholipase A2 activities.phospholipase A2 (pPLA2-II)	solyc04g079250.3.1	Transcript	phospholipase A2 (pPLA2-II) (original description: Patatin (AHRD V3.3 *** K4BV09_SOLLC)) &	9.34406	0	1
5.7.2.2.4	Lipid metabolism.lipid degradation.phospholipase activities.phospholipase A2 activities.phospholipase A2 (pPLA2-III)	solyc09g065240.3.1	Transcript	phospholipase A2 (pPLA2-III) (original description: Patatin (AHRD V3.3 *** K4CUF1_SOLLC)) &	2.50255	0	1
5.7.2.3.1	Lipid metabolism.lipid degradation.phospholipase activities.phospholipase C activities.phospholipase C (nPLC)	solyc01g008790.3.1	Transcript	phospholipase C (nPLC) (original description: Non specific phospholipase C (AHRD V3.3 *** A0A0K9P3E0_ZOSMR)) &	1.567	0	1
5.7.2.3.2	Lipid metabolism.lipid degradation.phospholipase activities.phospholipase C activities.phospholipase C (PI-PLC)	solyc10g076710.2.1	Transcript	phospholipase C (PI-PLC) (original description: Phosphoinositide phospholipase C (AHRD V3.3 *** A0A067L8K5_JATCU)) &	3.01464	0	1
5.7.2.4.2	Lipid metabolism.lipid degradation.phospholipase activities.phospholipase D activities.phospholipase D (PLD-beta|gamma)	solyc01g091910.4.1	Transcript	phospholipase D (PLD-beta|gamma) (original description: phospholipase PLDb2) &	2.46647	0	1
5.7.3.4.1	Lipid metabolism.lipid degradation.fatty acid degradation.alpha-oxidation.alpha dioxygenase	solyc02g087070.3.1	Transcript	alpha dioxygenase (original description: alpha-DOX1) &	7.25173	0	1
5.7.3.5.1	Lipid metabolism.lipid degradation.fatty acid degradation.auxiliary degradation activities.dodecenoyl-CoA isomerase	solyc01g091520.3.1	Transcript	dodecenoyl-CoA isomerase (original description: Enoyl-CoA hydratase/isomerase family protein (AHRD V3.3 *** B9HTL0_POPTR)) &	-1.38505	1	0
5.7.3.6.3	Lipid metabolism.lipid degradation.fatty acid degradation.glyoxylate cycle.isocitrate lyase	solyc07g052480.3.1	Transcript	isocitrate lyase (original description: isocitrate lyase LEU18678) &	-2.80724	1	0
5.8.2.1	Lipid metabolism.lipid trafficking.endoplasmic reticulum-plastid lipid transfer.phospholipid transverse translocation	solyc02g070210.3.1	Id	(original description: Sec14p-like phosphatidylinositol transfer family protein (AHRD V3.3 *** A0A061G966_THECC)) & Patellin-4 OS=Arabidopsis thaliana (sp|q94c59|patl4_arath : 454.0)	5.08058	0	1
5.8.2.1.1.1	Lipid metabolism.lipid trafficking.endoplasmic reticulum-plastid lipid transfer.phospholipid transverse translocation.ALA-ALIS flippase complex.active component ALA	solyc05g010120.3.1	Transcript	active component ALA of ALA-ALIS flippase complex (original description: Phospholipid-transporting ATPase (AHRD V3.3 *** A0A0V0IZF0_SOLCH)) &	1.91882	0	1
5.8.2.1.1.1	Lipid metabolism.lipid trafficking.endoplasmic reticulum-plastid lipid transfer.phospholipid transverse translocation.ALA-ALIS flippase complex.active component ALA	solyc12g044920.2.1	Transcript	active component ALA of ALA-ALIS flippase complex (original description: Phospholipid-transporting ATPase (AHRD V3.3 *** A0A0V0IZF4_SOLCH)) &	-1.63584	1	0
5.8.2.1.1.2	Lipid metabolism.lipid trafficking.endoplasmic reticulum-plastid lipid transfer.phospholipid transverse translocation.ALA-ALIS flippase complex.regulatory component ALIS	solyc05g054800.2.1	Transcript	regulatory component ALIS of ALA-ALIS flippase complex (original description: LEM3 (Ligand-effect modulator 3) family protein (AHRD V3.3 *** D7L0J9_ARALL)) &	1.63957	0	1
5.9.1	Lipid metabolism.lipid bodies-associated activities.lipid droplet biogenesis factor (SEIPIN)	solyc04g056380.3.1	Transcript	lipid droplet biogenesis factor (SEIPIN) (original description: Seipin (AHRD V3.3 *** A0A0B0N0V2_GOSAR)) &	2.89808	0	1
5.9.3	Lipid metabolism.lipid bodies-associated activities.caleosin lipid body surface protein (CLO/PXG)	solyc01g005400.3.1	Transcript	caleosin (original description: Caleosin-related family protein (AHRD V3.3 *** AT1G70670.1)) &	-2.79044	1	0
5.9.4	Lipid metabolism.lipid bodies-associated activities.steroleosin dehydrogenase (HSD/SLO)	solyc06g072670.3.1	Transcript	steroleosin (original description: hydroxysteroid dehydrogenase 1 (AHRD V3.3 *** AT5G50700.1)) &	6.6584	0	1

## Sheet: 06_Nucleotide_metabolism
Supplementary Table 10. Mapman categories of DEGs between phyA_BK and WT_BK.
BinCode	BinName	id	type	description	FoldChange	down	up			sum_down	sum_up
6.1	Nucleotide metabolism.purines	solyc05g043390.2.1	Id	no hits & (original description: Pseudouridine-5'-phosphate glycosidase (AHRD V3.3 --* M7YM69_TRIUA))	-4.87933	1	0			1	9
6.1.2.3	Nucleotide metabolism.purines.salvage pathway.adenosine kinase	solyc09g007940.3.1	Transcript	adenosine kinase (original description: Adenosine kinase, putative (AHRD V3.3 *** B9T0A9_RICCO)) &	5.24008	0	1
6.1.4.4	Nucleotide metabolism.purines.catabolism.nucleoside hydrolase (NSH3)	solyc01g080570.3.1	Transcript	nucleoside hydrolase (original description: inosine-uridine preferring nucleoside hydrolase family protein (AHRD V3.3 *** AT5G18860.2)) &	10.1371	0	1
6.2.1	Nucleotide metabolism.pyrimidines.de novo biosynthesis	solyc02g084130.3.1	Id	no hits & (original description: uridine kinase-like 5 (AHRD V3.3 --* AT3G27440.3))	4.1727	0	1
6.2.1.6	Nucleotide metabolism.pyrimidines.de novo biosynthesis.CTP synthetase	solyc01g056850.3.1	Transcript	CTP synthetase (original description: CTP synthase (AHRD V3.3 *** W8SVJ8_TOBAC)) &	2.75663	0	1
6.3.2.1	Nucleotide metabolism.deoxynucleotides.salvage pathway.thymidine kinase (TK1)	solyc11g065760.2.1	Transcript	thymidine kinase (TK1) (original description: TK1-like deoxyribonucleoside kinase) &	3.35631	0	1
6.3.2.4	Nucleotide metabolism.deoxynucleotides.salvage pathway.nucleoside diphosphate kinase	solyc08g082430.3.1	Transcript	nucleoside diphosphate kinase (original description: Nucleoside diphosphate kinase (AHRD V3.3 *** K4CPN9_SOLLC)) &	1.18571	0	1
6.3.2.4	Nucleotide metabolism.deoxynucleotides.salvage pathway.nucleoside diphosphate kinase	solyc01g005390.3.1	Id	(original description: Nudix hydrolase (AHRD V3.3 *** A0A061E9N4_THECC)) & Nudix hydrolase 17, mitochondrial OS=Arabidopsis thaliana (sp|q9zu95|nud17_arath : 205.0)	3.5315	0	1
6.3.3.2	Nucleotide metabolism.deoxynucleotides.catabolism.deoxyuridine triphosphatase (DUT)	solyc01g100030.4.1	Transcript	deoxyuridine triphosphatase (DUT) (original description: deoxyuridine triphosphatase) &	2.06286	0	1
6.3.3.3	Nucleotide metabolism.deoxynucleotides.catabolism.deoxyguanidine triphosphatase	solyc02g086900.3.1	Transcript	deoxyguanidine triphosphatase (original description: HD domain-containing metal-dependent phosphohydrolase family protein (AHRD V3.3 *** AT5G40270.1)) &	1.61387	0	1

## Sheet: 07_Coenzyme_metabolism
Supplementary Table 10. Mapman categories of DEGs between phyA_BK and WT_BK.
BinCode	BinName	id	type	description	FoldChange	down	up			sum_down	sum_up
7	Coenzyme metabolism	solyc01g008550.4.1	Id	(original description: phenylacetaldehyde reductase PAR2) & Cinnamoyl-CoA reductase 1 OS=Arabidopsis thaliana (sp|q9s9n9|ccr1_arath : 300.0)	2.57003	0	1			1	9
7	Coenzyme metabolism	solyc02g081360.3.1	Id	(original description: CoA ligase (AHRD V3.3 *** A0A0K9NMT8_ZOSMR)) & Butyrate--CoA ligase AAE11, peroxisomal OS=Arabidopsis thaliana (sp|q9c8d4|aae11_arath : 660.0)	4.56906	0	1
7	Coenzyme metabolism	solyc12g011160.2.1	Id	3-hydroxyisobutyryl-CoA hydrolase-like protein 5 OS=Arabidopsis thaliana (sp|q9shj8|hibc8_arath : 518.0) & Enzyme classification.EC_3 hydrolases.EC_3.1 hydrolase acting on ester bond(50.3.1 : 285.9) (original description: 3-hydroxyisobutyryl-CoA hydrolase-like protein (AHRD V3.3 *** A0A072V5U1_MEDTR)) &	1.12898	0	1
7.2.1.3	Coenzyme metabolism.thiamine pyrophosphate biosynthesis.hydroxymethylpyrimidine diphosphate biosynthesis.thiamine monophosphate phosphatase (Th2)	solyc09g064510.3.1	Transcript	thiamine monophosphate phosphatase (Th2) (original description: heme oxygenase-like, multi-helical (AHRD V3.3 *** AT5G32470.1)) &	4.60354	0	1
7.3.1	Coenzyme metabolism.S-adenosyl methionine (SAM) cycle.S-adenosyl methionine synthetase	solyc09g008280.2.1	Transcript	S-adenosyl methionine synthetase (original description: S-adenosyl-L-methionine synthetase Z24743) &	3.20704	0	1
7.3.1	Coenzyme metabolism.S-adenosyl methionine (SAM) cycle.S-adenosyl methionine synthetase	solyc10g083970.1.1	Transcript	S-adenosyl methionine synthetase (original description: S-adenosylmethionine synthase (AHRD V3.3 *** A0A0V0IPC3_SOLCH)) &	1.45325	0	1
7.9.1.2	Coenzyme metabolism.NAD/NADP biosynthesis.de-novo pathway.quinolinate synthase	solyc03g112060.3.1	Transcript	quinolinate synthase (original description: Quinolinate synthase A (AHRD V3.3 *** W9RJG8_9ROSA)) &	3.53307	0	1
7.12.1.2	Coenzyme metabolism.tetrapyrrol biosynthesis.5-aminolevulinic acid formation.glutamyl-tRNA reductase	solyc01g106390.3.1	Transcript	glutamyl-tRNA reductase (original description: Glutamyl-tRNA reductase (AHRD V3.3 *** K4B2K7_SOLLC)) &	2.81107	0	1
7.12.4.2.1	Coenzyme metabolism.tetrapyrrol biosynthesis.protoporphyrin IX formation.coproporphyrinogen III oxidase activities.oxygen-dependent coproporphyrinogen III oxidase (HemF)	solyc10g005120.2.1	Transcript	oxygen-dependent coproporphyrinogen III oxidase (HemF) (original description: 2-oxoglutarate (2OG) and Fe(II)-dependent oxygenase superfamily protein (AHRD V3.3 *** AT4G16330.2)) &	7.32	0	1
7.13.5	Coenzyme metabolism.phylloquinone biosynthesis.1,4-dihydroxy-2-naphthoyl-CoA thioesterase	solyc02g078410.1.1	Transcript	1,4-dihydroxy-2-naphthoyl-CoA thioesterase (original description: Thioesterase family protein (AHRD V3.3 *** D7KCZ7_ARALL)) &	-1.23216	1	0

## Sheet: 08_Polyamine_metabolism
Supplementary Table 10. Mapman categories of DEGs between phyA_BK and WT_BK.
BinCode	BinName	id	type	description	FoldChange	down	up			sum_down	sum_up
8.1.1.1	Polyamine metabolism.putrescine biosynthesis.plastidial/nuclear pathway.arginine decarboxylase	solyc10g054440.2.1	Transcript	arginine decarboxylase (original description: arginine decarboxylase 1) &	3.13624	0	1			0	3
8.2.1	Polyamine metabolism.spermidine biosynthesis.S-adenosyl methionine decarboxylase	solyc02g089610.2.1	Transcript	S-adenosyl methionine decarboxylase (original description: S-adenosylmethionine decarboxylase 2) &	2.38439	0	1
8.5.2.1	Polyamine metabolism.polyamine degradation.FAD-dependent polyamine oxidase activities.cytosolic polyamine oxidase (PAO1)	solyc01g087590.3.1	Transcript	cytosolic polyamine oxidase (PAO1) (original description: Polyamine oxidase (AHRD V3.3 *** Q4H439_TOBAC)) &	6.97977	0	1

## Sheet: 09_Secondary_metabolism
Supplementary Table 10. Mapman categories of DEGs between phyA_BK and WT_BK.
BinCode	BinName	id	type	description	FoldChange	down	up			sum_down	sum_up
9	Secondary metabolism	solyc02g070800.2.1	Id	no hits & (original description: Thiamine monophosphate synthase (AHRD V3.3 *** I3SV46_MEDTR))	2.60544	0	1			0	27
9.1.1.1	Secondary metabolism.terpenoids.mevalonate pathway.acetyl-CoA C-acyltransferase	solyc07g045350.3.1	Transcript	acetyl-CoA C-acyltransferase (original description: Acetoacetyl-CoA thiolase (AHRD V3.3 *** F5CLC4_CATRO)) &	2.61921	0	1
9.1.1.2	Secondary metabolism.terpenoids.mevalonate pathway.3-hydroxy-3-methylglutaryl-CoA synthase	solyc08g007790.3.1	Transcript	3-hydroxy-3-methylglutaryl-CoA synthase (original description: 3-hydroxy-3-methylglutaryl coenzyme A synthase) &	2.91085	0	1
9.1.1.2	Secondary metabolism.terpenoids.mevalonate pathway.3-hydroxy-3-methylglutaryl-CoA synthase	solyc08g080170.3.1	Transcript	3-hydroxy-3-methylglutaryl-CoA synthase (original description: Hydroxymethylglutaryl-CoA synthase, putative (AHRD V3.3 *** B9RC08_RICCO)) &	1.90968	0	1
9.1.1.5	Secondary metabolism.terpenoids.mevalonate pathway.phosphomevalonate kinase	solyc06g066310.3.1	Transcript	phosphomevalonate kinase (original description: Phosphomevalonate kinase (AHRD V3.3 *** A0A0X9ZV04_9ROSI)) &	2.15106	0	1
9.1.1.6	Secondary metabolism.terpenoids.mevalonate pathway.mevalonate diphosphate decarboxylase	solyc11g007020.2.1	Transcript	mevalonate diphosphate decarboxylase (original description: mevalonate disphosphate decarboxylase) &	1.38681	0	1
9.1.4.2	Secondary metabolism.terpenoids.terpene biosynthesis.mono-/sesquiterpene-/diterpene synthase	solyc01g101170.3.1	Transcript	mono-/sesquiterpene-/diterpene synthase (original description: Viridiflorene synthase (AHRD V3.3 *** TPS31_SOLLC)) &	12.4749	0	1
9.1.4.2	Secondary metabolism.terpenoids.terpene biosynthesis.mono-/sesquiterpene-/diterpene synthase	solyc01g101180.3.1	Transcript	mono-/sesquiterpene-/diterpene synthase (original description: viridiflorene synthase) &	13.1401	0	1
9.1.4.2	Secondary metabolism.terpenoids.terpene biosynthesis.mono-/sesquiterpene-/diterpene synthase	solyc01g101190.3.1	Transcript	mono-/sesquiterpene-/diterpene synthase (original description: Alpha-humulene/(-)-(E)-beta-caryophyllene synthase (AHRD V1 **** HUMS_ARATH)%3B contains Interpro domain(s) IPR005630 Terpene synthase%2C metal-binding domain) &	9.07658	0	1
9.1.5.1	Secondary metabolism.terpenoids.cycloartenol biosynthesis.squalene synthase	solyc01g110290.3.1	Transcript	squalene synthase (original description: Squalene synthase (AHRD V3.3 *** D0VFU8_SOLLC)) &	1.36493	0	1
9.1.5.2	Secondary metabolism.terpenoids.cycloartenol biosynthesis.squalene epoxidase	solyc04g077440.3.1	Transcript	squalene epoxidase (original description: Squalene monooxygenase (AHRD V3.3 *** Q506K3_DATIN)) &	1.4942	0	1
9.1.6.1.5	Secondary metabolism.terpenoids.carotenoid biosynthesis.carotenes.lycopene epsilon cyclase (LCY-e)	solyc12g008980.2.1	Transcript	lycopene epsilon cyclase (LCY-e) (original description: Delta) &	5.28012	0	1
9.1.6.1.6	Secondary metabolism.terpenoids.carotenoid biosynthesis.carotenes.lycopene beta cyclase (LCY-b)	solyc06g074240.2.1	Transcript	lycopene beta cyclase (LCY-b) (original description: Beta-carotene) &	1.64103	0	1
9.2.1.1.1	Secondary metabolism.phenolics.p-coumaroyl-CoA biosynthesis.phenylalanine ammonia lyase activity.phenylalanine ammonia lyase (PAL)	solyc05g056170.3.1	Transcript	phenylalanine ammonia lyase (PAL) (original description: phenylalanine ammonia-lyase 2) &	4.67607	0	1
9.2.1.1.1	Secondary metabolism.phenolics.p-coumaroyl-CoA biosynthesis.phenylalanine ammonia lyase activity.phenylalanine ammonia lyase (PAL)	solyc09g007890.1.1	Transcript	phenylalanine ammonia lyase (PAL) (original description: Phenylalanine ammonia-lyase (AHRD V3.3 *** PAL5_SOLLC)) &	2.42673	0	1
9.2.1.1.1	Secondary metabolism.phenolics.p-coumaroyl-CoA biosynthesis.phenylalanine ammonia lyase activity.phenylalanine ammonia lyase (PAL)	solyc09g007900.3.1	Transcript	phenylalanine ammonia lyase (PAL) (original description: Phenylalanine ammonia-lyase (AHRD V3.3 *** PAL5_SOLLC)) &	4.03808	0	1
9.2.1.1.1	Secondary metabolism.phenolics.p-coumaroyl-CoA biosynthesis.phenylalanine ammonia lyase activity.phenylalanine ammonia lyase (PAL)	solyc09g007910.3.1	Transcript	phenylalanine ammonia lyase (PAL) (original description: Phenylalanine ammonia-lyase (AHRD V3.3 *** PAL5_SOLLC)) &	3.25995	0	1
9.2.1.1.1	Secondary metabolism.phenolics.p-coumaroyl-CoA biosynthesis.phenylalanine ammonia lyase activity.phenylalanine ammonia lyase (PAL)	solyc09g007920.3.1	Transcript	phenylalanine ammonia lyase (PAL) (original description: Phenylalanine ammonia-lyase (AHRD V3.3 *** PAL5_SOLLC)) &	2.37034	0	1
9.2.2.1.1.2	Secondary metabolism.phenolics.flavonoid biosynthesis.chalcones.chalcone synthase activity.proteolytic chalcone synthase regulator (KFB-CHS)	solyc05g005150.1.1	Transcript	proteolytic chalcone synthase regulator (KFB-CHS) (original description: Kelch repeat-containing F-box family protein, putative (AHRD V3.3 *** A0A061E7C3_THECC)) &	3.46577	0	1
9.2.2.2.1	Secondary metabolism.phenolics.flavonoid biosynthesis.flavanones.chalcone isomerase	solyc05g010320.3.1	Transcript	chalcone isomerase (original description: Chalcone-flavonone isomerase family protein (AHRD V3.3 *** K4BXK5_SOLLC)) &	2.50979	0	1
9.2.2.3.1	Secondary metabolism.phenolics.flavonoid biosynthesis.flavones.type-I flavone synthase	solyc06g073080.3.1	Transcript	type-I flavone synthase (original description: 2-oxoglutarate (2OG) and Fe(II)-dependent oxygenase superfamily protein (AHRD V3.3 *** AT5G24530.1)) &	9.34424	0	1
9.2.2.4.3	Secondary metabolism.phenolics.flavonoid biosynthesis.dihydroflavonols.flavanone 3-hydroxylase	solyc02g083860.3.1	Transcript	flavanone 3-hydroxylase (original description: flavanone 3-dioxygenase) &	2.28271	0	1
9.2.2.5.1	Secondary metabolism.phenolics.flavonoid biosynthesis.flavonols.flavonol synthase	solyc11g013110.2.1	Transcript	flavonol synthase (original description: Flavonol synthase (AHRD V3.3 *** C0LUV3_SOLTU)) &	1.86163	0	1
9.2.2.7.1	Secondary metabolism.phenolics.flavonoid biosynthesis.aurones.aureusidin synthase	solyc08g074682.1.1	Transcript	aureusidin synthase (original description: polyphenol oxidase precursor) &	12.5912	0	1
9.2.2.7.1	Secondary metabolism.phenolics.flavonoid biosynthesis.aurones.aureusidin synthase	solyc08g074683.1.1	Transcript	aureusidin synthase (original description: polyphenol oxidase precursor) &	8.89521	0	1
9.2.2.8.2	Secondary metabolism.phenolics.flavonoid biosynthesis.isoflavonoids.2-hydroxyisoflavanone dehydratase	solyc09g075670.1.1	Transcript	2-hydroxyisoflavanone dehydratase (original description: Alpha/beta-Hydrolases superfamily protein (AHRD V3.3 *** A0A061EKQ6_THECC)) &	7.23567	0	1
9.4.1.2	Secondary metabolism.betaines.glycinebetaine biosynthesis.betaine-aldehyde dehydrogenase	solyc06g071290.3.1	Transcript	betaine-aldehyde dehydrogenase (original description: putative betaine aldehyde dehyrogenase) &	2.26706	0	1

## Sheet: 10_Redox_homeostasis
Supplementary Table 10. Mapman categories of DEGs between phyA_BK and WT_BK.
BinCode	BinName	id	type	description	FoldChange	down	up			sum_down	sum_up
10	Redox homeostasis	solyc01g073640.3.1	Id	(original description: alcohol dehydrogenase-3,Pfam:PF13561) & Short-chain dehydrogenase reductase 3b OS=Arabidopsis thaliana (sp|q94k41|sdr3b_arath : 291.0)	5.06901	0	1			2	20
10	Redox homeostasis	solyc01g006630.3.1	Id	no hits & (original description: Oxidoreductase, putative (AHRD V3.3 *** B9RI76_RICCO))	1.29139	0	1
10	Redox homeostasis	solyc02g070110.1.1	Id	Enzyme classification.EC_1 oxidoreductases.EC_1.1 oxidoreductase acting on CH-OH group of donor(50.1.1 : 518.8) & Berberine bridge enzyme-like 28 OS=Arabidopsis thaliana (sp|q9fi21|bbe28_arath : 496.0) (original description: FAD-binding Berberine family protein (AHRD V3.3 *** A0A061GF79_THECC)) &	9.28127	0	1
10.1.1	Redox homeostasis.reactive oxygen generation.NADPH-oxidase (Rboh)	solyc03g117980.3.1	Transcript	NADPH-oxidase (Rboh) (original description: whitefly-induced gp91-phox) &	2.9952	0	1
10.1.1	Redox homeostasis.reactive oxygen generation.NADPH-oxidase (Rboh)	solyc06g068680.3.1	Transcript	NADPH-oxidase (Rboh) (original description: Respiratory burst oxidase homolog (AHRD V3.3 *** Q84KK7_NICBE)) &	4.05879	0	1
10.1.1	Redox homeostasis.reactive oxygen generation.NADPH-oxidase (Rboh)	solyc01g008560.3.1	Id	NAD(H) kinase 1 OS=Arabidopsis thaliana (sp|q56yn3|nadk1_arath : 701.0) & Enzyme classification.EC_2 transferases.EC_2.7 transferase transferring phosphorus-containing group(50.2.7 : 376.1) (original description: NAD kinase 1 (AHRD V3.3 *** AT3G21070.2)) &	2.82168	0	1
10.2.1	Redox homeostasis.enzymatic reactive oxygen species scavengers.catalase	solyc04g082460.3.1	Transcript	catalase (original description: Catalase 3) &	-1.27436	1	0
10.3.1	Redox homeostasis.low-molecular-weight scavengers.ascorbate biosynthesis	solyc02g065170.3.1	Id	L-ascorbate oxidase homolog OS=Brassica napus (sp|q00624|asol_brana : 595.0) & Enzyme classification.EC_1 oxidoreductases.EC_1.10 oxidoreductase acting on diphenol or related substance as donor(50.1.10 : 124.4) (original description: L-ascorbate oxidase like (AHRD V3.3 *** A0A0B2RUS1_GLYSO)) &	2.80405	0	1
10.3.1	Redox homeostasis.low-molecular-weight scavengers.ascorbate biosynthesis	solyc02g090360.3.1	Id	L-ascorbate oxidase homolog OS=Nicotiana tabacum (sp|p29162|asol_tobac : 592.0) & Enzyme classification.EC_1 oxidoreductases.EC_1.10 oxidoreductase acting on diphenol or related substance as donor(50.1.10 : 125.4) (original description: L-ascorbate oxidase like (AHRD V3.3 *** A0A0B2RUS1_GLYSO)) &	3.14629	0	1
10.3.1.2	Redox homeostasis.low-molecular-weight scavengers.ascorbate biosynthesis.phosphomannomutase (PMM)	solyc05g046340.2.1	Transcript	phosphomannomutase (PMM) (original description: Phosphomannomutase (AHRD V3.3 *** K4C0W7_SOLLC)) &	5.16197	0	1
10.3.3.2.1	Redox homeostasis.low-molecular-weight scavengers.glutathione metabolism.glutathione degradation.gamma-glutamyl cyclotransferase	solyc11g012910.2.1	Transcript	gamma-glutamyl cyclotransferase (original description: Gamma-glutamylcyclotransferase (AHRD V3.3 *** K4D695_SOLLC)) &	1.10537	0	1
10.3.3.2.1	Redox homeostasis.low-molecular-weight scavengers.glutathione metabolism.glutathione degradation.gamma-glutamyl cyclotransferase	solyc12g096320.2.1	Transcript	gamma-glutamyl cyclotransferase (original description: Gamma-glutamylcyclotransferase (AHRD V3.3 *** K4DHA5_SOLLC)) &	3.42163	0	1
10.4	Redox homeostasis.hydrogen peroxide removal	solyc01g006290.3.1	Id	(original description: Peroxidase (AHRD V3.3 *** K4ASJ5_SOLLC)) & Lignin-forming anionic peroxidase OS=Nicotiana tabacum (sp|p11965|perx_tobac : 482.0)	11.009	0	1
10.4	Redox homeostasis.hydrogen peroxide removal	solyc01g105070.3.1	Id	(original description: LECEVI16G peroxidase precursor) & Peroxidase N1 OS=Nicotiana tabacum (sp|q9xiv8|pern1_tobac : 478.0)	3.9909	0	1
10.4	Redox homeostasis.hydrogen peroxide removal	solyc02g079510.3.1	Id	(original description: Peroxidase (AHRD V1 **** Q50LG4_TOBAC)%3B contains Interpro domain(s) IPR019793 Peroxidases heam-ligand binding site IPR019794 Peroxidase%2C active site IPR002016 Haem peroxidase%2C plant/fungal/bacterial) & Suberization-associated anionic peroxidase 2 OS=Solanum lycopersicum (sp|p15004|per2_sollc : 611.0)	2.93184	0	1
10.4.1.3	Redox homeostasis.hydrogen peroxide removal.ascorbate-glutathione cycle.dehydroascorbate reductase (DHAR)	solyc04g064470.2.1	Transcript	dehydroascorbate reductase (DHAR) (original description: Squamosa promoter-binding-like protein (AHRD V3.3 *-* A0A072V7X4_MEDTR)) &	2.56013	0	1
10.4.1.3	Redox homeostasis.hydrogen peroxide removal.ascorbate-glutathione cycle.dehydroascorbate reductase (DHAR)	solyc09g056180.3.1	Transcript	dehydroascorbate reductase (DHAR) (original description: Dehydroascorbate reductase (AHRD V3.3 *-* Q1G0W3_SOLLC),Pfam:PF13410) &	5.11919	0	1
10.4.2	Redox homeostasis.hydrogen peroxide removal.glutathione peroxidase	solyc08g080940.3.1	Transcript	glutathione peroxidase (original description: glutathione peroxidase like encoding 1) &	1.06644	0	1
10.4.3.2	Redox homeostasis.hydrogen peroxide removal.peroxiredoxin activities.type-2 peroxiredoxin (PrxII)	solyc10g083650.1.1	Transcript	type-2 peroxiredoxin (PrxII) (original description: Peroxiredoxin, putative (AHRD V3.3 *** B9SRG0_RICCO)) &	1.35559	0	1
10.6.1	Redox homeostasis.cytosol/mitochondrion/nucleus redox homeostasis.H-type thioredoxin	solyc04g080850.3.1	Transcript	H-type thioredoxin (original description: Thioredoxin (AHRD V3.3 *** Q201Z4_9SOLN)) &	1.23802	0	1
10.6.1	Redox homeostasis.cytosol/mitochondrion/nucleus redox homeostasis.H-type thioredoxin	solyc05g006870.3.1	Transcript	H-type thioredoxin (original description: Thioredoxin H (AHRD V3.3 *** Q4U0W0_NICAL)) &	1.56581	0	1
10.6.3	Redox homeostasis.cytosol/mitochondrion/nucleus redox homeostasis.nucleoredoxin	solyc05g005460.3.1	Transcript	nucleoredoxin (original description: Cysteine/Histidine-rich C1 domain family protein (AHRD V3.3 --* AT2G44370.1)) &	-2.20757	1	0

[truncated: 19 more sheets: 11_Phytohormone_action, 12_Chromatin_organisation, 13_Cell_cycle_organisation, 14_DNA_damage_response, 15_RNA_biosynthesis, 16_RNA_processing, 17_Protein_biosynthesis, 18_Protein_modification, 19_Protein_homeostasis, 20_Cytoskeleton_organisation, 21_Cell_wall_organisation, 22_Vesicle_trafficking, 23_Protein_translocation, 24_Solute_transport, 25_Nutrient_uptake, 26_External_stimuli_response, 27_Multi-process_regulation, 35_not_assigned, 50_Enzyme_classification]
