# Supplementary material for: Phytochrome-Mediated Light Perception Affects Fruit Development and Ripening Through Epigenetic Mechanisms
Source: Front Plant Sci. 2022 Apr 28;13:870974. doi: 10.3389/fpls.2022.870974 (PMC9096621; doi:10.3389/fpls.2022.870974)
Supplement: Supplementary file 9 [file Data_Sheet_9.XLSX]

## Sheet: PHYB1B2_hypo_DMP_IG_All
Supplementary Table 12. Total differentially methylated promoters (DMPs) in immature green fruits in all mC contexts
ID	chr	from	to	strand	met_WT	unmet_WT	met_PHYB1B2	unmet_PHYB1B2	X.met_WT	X.met_PHYB1B2	X.diff_PHYB1B2.ctrl	FDR_diff_PHYB1B2.WT	logFC_PHYB1B2	logCPM_PHYB1B2	PValue_PHYB1B2	padj_PHYB1B2
Solyc00g005090	SL3.0ch00	1061916	1063916	-	652	1580	454	1333	29.211	25.406	-3.80576	0.00447488	-5.12548e-15	-3.91086	1	1
Solyc00g005285	SL3.0ch00	2356500	2358500	-	1750	3661	1710	3846	32.342	30.778	-1.56399	0.0386998	-5.12548e-15	-3.87049	1	1
Solyc00g005430	SL3.0ch00	2358571	2360571	-	1983	6874	1378	5120	22.389	21.207	-1.18255	0.0393334	-5.12548e-15	-3.65101	1	1
Solyc00g005445	SL3.0ch00	2377779	2379779	-	1515	2525	1277	2333	37.5	35.374	-2.12604	0.0269198	-5.12548e-15	-3.91086	1	1
Solyc00g005850	SL3.0ch00	3432603	3434603	-	5183	11796	4893	11626	30.526	29.62	-0.905507	0.0348997	-5.12548e-15	-3.91086	1	1
Solyc00g005900	SL3.0ch00	3739496	3741496	-	1919	4202	1500	3633	31.351	29.223	-2.12841	0.00838958	-5.12548e-15	-3.91086	1	1
Solyc00g005903	SL3.0ch00	4162096	4164096	+	21681	15723	21919	16335	57.964	57.299	-0.665806	0.0317078	-5.12548e-15	-3.91086	1	1
Solyc00g005907	SL3.0ch00	4172134	4174134	+	29723	19526	26424	19521	60.352	57.512	-2.84025	1.44902e-18	-5.12548e-15	-3.91086	1	1
Solyc00g006487	SL3.0ch00	4287311	4289311	-	4310	6267	4674	7390	40.749	38.743	-2.00543	0.00133744	-5.12548e-15	-3.91086	1	1
Solyc00g006590	SL3.0ch00	5032575	5034575	-	1592	6914	1433	6807	18.716	17.391	-1.32542	0.0143078	-5.12548e-15	-3.6115	1	1
Solyc00g006680	SL3.0ch00	5629656	5631656	+	64902	60890	5518	7580	51.595	42.129	-9.46613	3.71519e-93	-1.58147	-3.31508	0.553299	1
Solyc00g006683	SL3.0ch00	5682337	5684337	-	144	67	577	379	68.246	60.356	-7.8908	0.0179162	-5.12548e-15	-3.91086	1	1
Solyc00g006830	SL3.0ch00	5838523	5840523	-	4374	5602	3370	5180	43.845	39.415	-4.43002	1.40748e-09	0.0349735	5.24288	0.897737	1
Solyc00g007555	SL3.0ch00	6673303	6675303	+	4107	7172	3745	6898	36.413	35.187	-1.22536	0.0291264	-5.12548e-15	-3.91086	1	1
Solyc00g007925	SL3.0ch00	6898252	6900252	-	849	723	1088	1041	54.008	51.104	-2.90383	0.0398728	-5.12548e-15	-3.91086	1	1
Solyc00g008030	SL3.0ch00	6993244	6995244	-	1933	3553	1233	2735	35.235	31.074	-4.16156	2.03717e-05	-5.12548e-15	-3.91086	1	1
Solyc00g008060	SL3.0ch00	7070304	7072304	-	1599	2873	1425	3121	35.756	31.346	-4.40958	8.65031e-06	-5.12548e-15	-3.91086	1	1
Solyc00g008070	SL3.0ch00	7078627	7080627	+	1292	1067	809	915	54.769	46.926	-7.84322	7.45155e-07	-5.12548e-15	-3.91086	1	1
Solyc00g008150	SL3.0ch00	7145063	7147063	-	320	602	295	657	34.707	30.987	-3.71976	0.0445043	-5.12548e-15	-3.91086	1	1
Solyc00g008270	SL3.0ch00	7309768	7311768	+	980	572	962	702	63.144	57.813	-5.33183	0.00137768	-5.12548e-15	-3.91086	1	1
Solyc00g008570	SL3.0ch00	7584122	7586122	-	1176496	565476	51188	42738	67.538	54.498	-13.0399	0	-0.00547514	4.32545	0.994265	1
Solyc00g008580	SL3.0ch00	7582182	7584182	+	562935	510641	34020	44892	52.436	43.111	-9.32419	0	-0.179713	5.85972	0.777966	1
Solyc00g008910	SL3.0ch00	7693875	7695875	+	10057	5722	6298	3781	63.737	62.486	-1.25025	0.0218731	-5.12548e-15	-3.91086	1	1
Solyc00g008915	SL3.0ch00	7737914	7739914	-	1563	594	387	194	72.462	66.609	-5.85246	0.00367514	-5.12548e-15	-3.91086	1	1
Solyc00g009040	SL3.0ch00	7811311	7813311	+	11843	11762	12683	13178	50.172	49.043	-1.12861	0.0069232	-0.870507	-2.81329	0.659328	1
Solyc00g009142	SL3.0ch00	8038913	8040913	+	9394	5006	7603	4855	65.236	61.029	-4.20705	1.77463e-12	-5.12548e-15	-3.91086	1	1
Solyc00g009146	SL3.0ch00	8215570	8217570	-	2078	4610	1660	4080	31.071	28.92	-2.15071	0.00550404	-5.12548e-15	-3.87428	1	1
Solyc00g009760	SL3.0ch00	8404083	8406083	+	23948	23080	4273	5175	50.923	45.227	-5.69635	1.85338e-23	-0.221231	4.48675	0.706752	1
Solyc00g010520	SL3.0ch00	8837560	8839560	-	4631	3256	3691	2819	58.717	56.697	-2.01949	0.00812109	-5.12548e-15	-3.91086	1	1
Solyc00g010530	SL3.0ch00	8854847	8856847	-	125669	103305	11218	11863	54.884	48.603	-6.28078	9.35749e-73	-0.12859	-2.83969	1	1
Solyc00g010760	SL3.0ch00	8955572	8957572	-	2309	5068	2725	6340	31.3	30.061	-1.23931	0.0421974	-5.12548e-15	-3.91086	1	1
Solyc00g011150	SL3.0ch00	9131088	9133088	-	286052	317427	20333	33044	47.4	38.093	-9.3073	0	-0.182471	4.0957	0.752089	1
Solyc00g011160	SL3.0ch00	9129189	9131189	+	948508	192234	35886	13655	83.148	72.437	-10.7114	0	-0.233163	5.13575	0.691237	1
Solyc00g011175	SL3.0ch00	9159658	9161658	+	3277	2244	1544	1170	59.355	56.89	-2.46499	0.017716	-5.12548e-15	-3.91086	1	1
Solyc00g011870	SL3.0ch00	9381599	9383599	-	3970	9329	3788	9830	29.852	27.816	-2.03574	0.000174596	-5.12548e-15	-3.91086	1	1
Solyc00g011895	SL3.0ch00	9476079	9478079	+	6319	4639	5810	4540	57.666	56.135	-1.53037	0.0132536	-5.12548e-15	-3.91086	1	1
Solyc00g012430	SL3.0ch00	9551103	9553103	+	265078	237660	15603	21293	52.727	42.289	-10.4377	0	-0.0166135	0.150227	1	1
Solyc00g012440	SL3.0ch00	9563323	9565323	+	9354	8652	2016	1974	51.949	50.526	-1.42303	0.0499549	-0.820178	2.48019	0.220357	1
Solyc00g013186	SL3.0ch00	9906680	9908680	+	5644	4074	3562	2768	58.078	56.272	-1.80607	0.0129008	-5.12548e-15	-3.91086	1	1
Solyc00g014180	SL3.0ch00	9969604	9971604	+	6114	5283	6117	5741	53.646	51.585	-2.06027	0.00109539	-5.12548e-15	-3.91086	1	1
Solyc00g014390	SL3.0ch00	10022073	10024073	+	566	2062	487	2064	21.537	19.091	-2.44674	0.0155234	-5.12548e-15	-3.91086	1	1
Solyc00g015737	SL3.0ch00	10361092	10363092	-	10765	7701	8726	6583	58.296	56.999	-1.29718	0.00900466	-5.12548e-15	-3.91086	1	1
Solyc00g016790	SL3.0ch00	10444493	10446493	+	14538	9101	13610	9086	61.5	59.967	-1.53355	0.000498071	-5.12548e-15	-3.91086	1	1
Solyc00g017235	SL3.0ch00	10541075	10543075	+	1867	1071	1725	1293	63.547	57.157	-6.38957	4.84162e-07	-5.12548e-15	-3.91086	1	1
Solyc00g017540	SL3.0ch00	10558570	10560570	+	795	2595	769	2867	23.451	21.15	-2.30171	0.0116492	-5.12548e-15	-3.91086	1	1
Solyc00g018970	SL3.0ch00	10735340	10737340	+	7929	7357	6301	6230	51.871	50.283	-1.5877	0.00496613	-1.82825	-3.83197	1	1
Solyc00g019610	SL3.0ch00	10805934	10807934	+	859	1922	632	1642	30.888	27.792	-3.09573	0.00930999	-5.12548e-15	-3.91086	1	1
Solyc00g019970	SL3.0ch00	10844621	10846621	+	1240	89866	860	69094	1.361	1.229	-0.131673	0.0114067	-5.12548e-15	-2.4819	1	1
Solyc00g022107	SL3.0ch00	11072272	11074272	-	3989	13560	4034	14460	22.731	21.812	-0.91816	0.0188556	-0.373754	-2.03865	0.864694	1
Solyc00g022920	SL3.0ch00	11136177	11138177	+	3227	2357	3159	2478	57.79	56.04	-1.74967	0.0303853	-5.12548e-15	-3.91086	1	1
Solyc00g026905	SL3.0ch00	11436456	11438456	-	6092	7402	4609	6049	45.146	43.245	-1.90148	0.0019835	-5.12548e-15	-3.91086	1	1
Solyc00g027770	SL3.0ch00	11475330	11477330	+	4111	3577	4047	3837	53.473	51.332	-2.14113	0.00449832	0.087795	6.00804	0.744866	1
Solyc00g034810	SL3.0ch00	11904459	11906459	-	4379	5814	4006	5741	42.961	41.1	-1.86103	0.00461461	-5.12548e-15	-3.91086	1	1
Solyc00g048510	SL3.0ch00	12614041	12616041	+	9190	15703	11217	20815	36.918	35.018	-1.8999	2.57096e-06	0.693754	2.93276	0.378475	1
Solyc00g055960	SL3.0ch00	12972185	12974185	+	380	349	72	177	52.126	28.916	-23.2105	2.46605e-10	-5.12548e-15	-3.91086	1	1
Solyc00g068970	SL3.0ch00	13555018	13557018	-	15921	20275	1786	2665	43.986	40.126	-3.85971	9.18808e-07	-0.530865	4.99672	0.364853	1
Solyc00g068980	SL3.0ch00	13553285	13555285	+	301330	211000	20550	23880	58.816	46.253	-12.5631	0	0.12566	2.42878	0.86872	1
Solyc00g071180	SL3.0ch00	13651920	13653920	-	7097	13891	7038	14303	33.815	32.979	-0.835787	0.033891	9.80251	-0.604256	0.000383714	0.0303643
Solyc06g024210	SL3.0ch00	14392228	14394228	-	3669	3844	2632	3009	48.835	46.658	-2.17696	0.00756241	-0.257931	5.08388	0.665926	1
Solyc00g090870	SL3.0ch00	14449470	14451470	-	3907	4859	2748	4233	44.57	39.364	-5.20594	7.72925e-11	0.375143	2.38534	0.356296	1
Solyc00g092870	SL3.0ch00	14521606	14523606	+	21290	13387	20398	13471	61.395	60.226	-1.169	0.00112892	-5.12548e-15	-3.91086	1	1
Solyc00g094520	SL3.0ch00	14585676	14587676	-	3683	174161	2628	136542	2.071	1.888	-0.182578	0.000189695	5.41299	-2.96074	0.0446753	0.649162
Solyc00g094530	SL3.0ch00	14586705	14588705	-	3998	187385	2850	146184	2.089	1.912	-0.176689	0.000196275	3.46363	-2.86231	0.334099	1
Solyc00g102400	SL3.0ch00	14873561	14875561	+	6233	7440	6336	7872	45.586	44.595	-0.991597	0.0455001	-5.12548e-15	-3.91086	1	1
Solyc00g114550	SL3.0ch00	15306474	15308474	+	1011	1074	619	780	48.489	44.246	-4.24332	0.00777141	-5.12548e-15	-3.91086	1	1
Solyc00g117450	SL3.0ch00	15410790	15412790	-	3222	8614	3180	9081	27.222	25.936	-1.28614	0.0131148	-5.12548e-15	-3.91086	1	1
Solyc00g118680	SL3.0ch00	15446465	15448465	-	2960	71956	1545	49205	3.951	3.044	-0.906757	3.06385e-17	0.227056	-3.2667	1	1
Solyc00g117655	SL3.0ch00	15442702	15444702	+	181	9286	81	6638	1.912	1.206	-0.706368	0.000276959	-1.34007	-2.52848	0.242221	1
Solyc00g121230	SL3.0ch00	15526756	15528756	-	2381	7682	2321	8265	23.661	21.925	-1.73575	0.00184942	-5.12548e-15	-3.91086	1	1
Solyc00g123240	SL3.0ch00	15592269	15594269	+	1615	3185	1595	3459	33.646	31.559	-2.08667	0.0148802	-5.12548e-15	-3.91086	1	1
Solyc00g125980	SL3.0ch00	15682094	15684094	+	2496	67115	1344	45313	3.586	2.881	-0.705044	4.79244e-11	-5.12548e-15	-3.91086	1	1
Solyc00g125990	SL3.0ch00	15682094	15684094	+	2496	67115	1344	45313	3.586	2.881	-0.705044	4.79244e-11	0.344162	-0.33344	0.716577	1
Solyc00g129880	SL3.0ch00	15807077	15809077	+	1982	6648	2127	8156	22.966	20.685	-2.28177	0.000121705	-5.12548e-15	-3.91086	1	1
Solyc00g129980	SL3.0ch00	15812774	15814774	-	1614	3213	797	2214	33.437	26.47	-6.96731	9.95918e-11	-5.12548e-15	-3.91086	1	1
Solyc00g134620	SL3.0ch00	15963948	15965948	-	3492	7470	3018	7053	31.856	29.967	-1.88827	0.00193706	-4.89758	-3.5284	0.197023	1
Solyc00g134830	SL3.0ch00	15966197	15968197	+	868	2108	703	2044	29.167	25.592	-3.57511	0.00157496	1.8489	-3.87283	1	1
Solyc00g143770	SL3.0ch00	16255415	16257415	-	1538	3125	1060	2991	32.983	26.166	-6.81668	6.62766e-12	-0.606095	1.54555	0.339926	1
Solyc00g167800	SL3.0ch00	16979826	16981826	+	3553	6747	2931	6132	34.495	32.34	-2.15486	0.00103002	-5.12548e-15	-3.91086	1	1
Solyc00g172410	SL3.0ch00	17116659	17118659	-	5574	7397	5675	8471	42.973	40.117	-2.85544	1.80318e-06	-5.12548e-15	-3.91086	1	1
Solyc00g180440	SL3.0ch00	17342216	17344216	-	1324	1703	521	944	43.74	35.563	-8.17654	1.96228e-07	-5.12548e-15	-3.62872	1	1
Solyc00g201160	SL3.0ch00	17912082	17914082	-	2079	8015	1351	5748	20.596	19.031	-1.56554	0.00662739	0.573624	2.6089	0.282773	1
Solyc00g203660	SL3.0ch00	17977333	17979333	-	1840	9681	946	6131	15.971	13.367	-2.60359	1.19836e-06	-2.05803	-0.371376	0.0743534	0.800805
Solyc00g217960	SL3.0ch00	18350138	18352138	+	2009	3598	1252	2415	35.83	34.142	-1.68786	0.0468152	-0.684991	4.61513	0.0753181	0.805939
Solyc00g226760	SL3.0ch00	18575849	18577849	+	221	419	845	3057	34.531	21.656	-12.8757	1.23185e-11	-5.61369	-3.33246	0.0336963	0.563728
Solyc00g247305	SL3.0ch00	19115642	19117642	-	7120	10046	7031	11110	41.477	38.758	-2.71983	2.04528e-07	-5.12548e-15	-3.86745	1	1
Solyc00g249900	SL3.0ch00	19145298	19147298	+	1867	1855	1536	1823	50.161	45.728	-4.43331	0.00014962	-1.05374	-2.9852	0.730307	1
Solyc00g254110	SL3.0ch00	19246090	19248090	+	46	38	415	528	54.762	44.008	-10.7534	0.0325985	-5.12548e-15	-3.91086	1	1
Solyc00g265110	SL3.0ch00	19509794	19511794	-	2506	2926	1753	2243	46.134	43.869	-2.26515	0.0154475	-1.85322	-2.71469	0.222097	1
Solyc00g272810	SL3.0ch00	19688234	19690234	-	1032	4072	756	3484	20.219	17.83	-2.38925	0.00224938	0.432359	-1.04024	0.715353	1
Solyc00g280110	SL3.0ch00	19855053	19857053	-	3622	3511	4188	4550	50.778	47.929	-2.84949	0.000264487	4.68536	-2.64721	0.00626016	0.21444
Solyc00g311230	SL3.0ch00	20540213	20542213	+	1346	1635	1439	2135	45.153	40.263	-4.88962	5.72633e-05	-5.12548e-15	-3.91086	1	1
Solyc01g005060	SL3.0ch01	61589	63589	-	685	8092	611	8321	7.804	6.841	-0.963916	0.00787406	-5.12548e-15	-3.91086	1	1
Solyc01g005100	SL3.0ch01	97452	99452	-	1372	3833	1447	4412	26.359	24.697	-1.66222	0.0235507	0.162137	4.06151	0.646422	1
Solyc01g005120	SL3.0ch01	107325	109325	-	1410	8423	1375	8902	14.339	13.379	-0.960078	0.0250458	-0.207612	3.07059	0.703217	1
Solyc01g005130	SL3.0ch01	122769	124769	+	441	3234	201	2283	12	8.092	-3.90821	7.5653e-07	-0.14318	4.23302	0.701746	1
Solyc01g005150	SL3.0ch01	134364	136364	-	1932	6963	1668	7323	21.72	18.552	-3.16818	1.38312e-07	-1.26767	-0.622394	0.0964512	0.888683
Solyc01g005170	SL3.0ch01	139245	141245	+	2122	9132	1952	9080	18.856	17.694	-1.16154	0.0134562	0.871056	-2.12472	0.525018	1
Solyc01g005290	SL3.0ch01	209394	211394	-	1700	6132	1228	5218	21.706	19.051	-2.65525	6.94965e-05	-3.99729	3.2152	1.53778e-06	0.000379334
Solyc01g005295	SL3.0ch01	211044	213044	-	6987	9773	5339	7978	41.689	40.092	-1.59693	0.00309061	-2.97171	1.99562	0.00170757	0.0913372
Solyc01g005310	SL3.0ch01	225919	227919	-	2922	6572	2230	5957	30.777	27.238	-3.53903	2.53363e-07	0.497127	-2.32456	0.812614	1
Solyc01g005360	SL3.0ch01	255331	257331	+	1427	8977	1330	9817	13.716	11.931	-1.78442	7.41928e-05	-5.12548e-15	-3.91086	1	1
Solyc01g005380	SL3.0ch01	259020	261020	+	1460	8805	964	7035	14.223	12.052	-2.17158	1.51557e-05	1.34623	-1.76595	0.284367	1
Solyc01g005385	SL3.0ch01	259135	261135	+	1474	8471	943	6685	14.822	12.362	-2.45917	2.56965e-06	-5.12548e-15	-3.79823	1	1
Solyc01g005440	SL3.0ch01	307089	309089	+	1017	6595	647	6341	13.36	9.259	-4.10175	1.1117e-14	0.862361	7.13767	0.0157193	0.370475
Solyc01g005470	SL3.0ch01	324960	326960	-	1653	12226	1497	11839	11.91	11.225	-0.684825	0.0375348	0.556618	2.29653	0.624286	1
Solyc01g005500	SL3.0ch01	342743	344743	+	1539	9727	1301	8941	13.661	12.703	-0.957974	0.020322	8.37908	1.75513	0.00117625	0.0696556
Solyc01g005510	SL3.0ch01	348880	350880	-	3752	4976	4071	6300	42.988	39.254	-3.7344	1.94136e-07	1.8488	-3.29228	1	1
Solyc01g005520	SL3.0ch01	348023	350023	+	3810	5361	4119	6830	41.544	37.62	-3.92412	1.72735e-08	-0.99368	4.449	0.00518891	0.190821
Solyc01g005560	SL3.0ch01	392352	394352	+	775	9413	686	9199	7.607	6.94	-0.667181	0.0352849	-0.467823	8.1311	0.119113	0.960419
Solyc01g005570	SL3.0ch01	403017	405017	-	1283	3527	1039	4570	26.674	18.524	-8.1498	9.8727e-23	0.190583	4.56945	0.521268	1
Solyc01g005600	SL3.0ch01	426353	428353	-	6123	11005	6444	12045	35.748	34.853	-0.895326	0.0373928	0.00480988	6.32429	0.986633	1
Solyc01g005610	SL3.0ch01	425654	427654	+	4360	9461	4611	10946	31.546	29.639	-1.90681	0.000282585	1.84897	-3.34553	1	1
Solyc01g005630	SL3.0ch01	442810	444810	+	7777	11247	7671	12095	40.88	38.809	-2.07088	2.59449e-05	-5.12548e-15	-3.91086	1	1
Solyc01g005640	SL3.0ch01	447851	449851	+	722	7747	550	6635	8.525	7.655	-0.870373	0.0247075	0.396538	5.15533	0.176371	1
Solyc01g005665	SL3.0ch01	459646	461646	+	5088	12094	4544	11287	29.612	28.703	-0.909208	0.0344695	0.457924	-2.18294	0.765905	1
Solyc01g005795	SL3.0ch01	508898	510898	-	4806	10444	4106	10235	31.515	28.631	-2.88356	7.24242e-08	0.884563	-3.00548	0.831613	1
Solyc01g005820	SL3.0ch01	533571	535571	+	2186	5063	1935	4845	30.156	28.54	-1.61606	0.0186186	0.480901	7.47843	0.103571	0.910507
Solyc01g005900	SL3.0ch01	593877	595877	-	1584	5899	1287	6475	21.168	16.581	-4.5872	7.82264e-13	5.17326	-3.25021	0.0352123	0.573642
Solyc01g005950	SL3.0ch01	624436	626436	-	5446	8733	3344	6489	38.409	34.008	-4.40098	5.36584e-12	-0.153071	5.83825	0.573567	1
Solyc01g005960	SL3.0ch01	623152	625152	+	5655	10386	3511	7553	35.253	31.734	-3.51986	2.18805e-09	0.209558	5.87646	0.438359	1
Solyc01g005970	SL3.0ch01	640038	642038	+	3097	10896	3121	12441	22.132	20.055	-2.07723	1.11379e-05	0.0794624	2.72944	0.845671	1
Solyc01g005990	SL3.0ch01	655153	657153	-	3210	7195	2848	7789	30.851	26.774	-4.07609	1.01428e-10	-1.35452	1.02438	0.1402	1
Solyc01g006040	SL3.0ch01	726948	728948	-	5678	11071	5974	12222	33.901	32.831	-1.06914	0.0179293	0.385045	5.02186	0.205246	1
Solyc01g006180	SL3.0ch01	818879	820879	-	502	2885	373	2619	14.821	12.467	-2.3548	0.00407023	0.390922	3.451	0.283576	1
Solyc01g006270	SL3.0ch01	874392	876392	-	59	629	10	459	8.576	2.132	-6.44339	1.76636e-06	-5.12548e-15	-3.91086	1	1
Solyc01g006290	SL3.0ch01	882366	884366	+	4910	9908	4480	9716	33.135	31.558	-1.57719	0.00256073	5.59824	2.82469	0.0138836	0.344614
Solyc01g006310	SL3.0ch01	896761	898761	+	1118	7026	1322	9056	13.728	12.738	-0.989413	0.024557	-5.12548e-15	-3.91086	1	1
Solyc01g006370	SL3.0ch01	1005282	1007282	-	2029	9199	2149	10467	18.071	17.034	-1.03697	0.0184868	-0.111296	6.81609	0.729203	1
Solyc01g006400	SL3.0ch01	1022356	1024356	-	4658	7489	4934	9185	38.347	34.946	-3.4011	1.46184e-08	4.65377	3.30892	0.00186621	0.0964606
Solyc01g006410	SL3.0ch01	1025244	1027244	-	3236	10900	2998	11091	22.892	21.279	-1.6129	0.000747362	-5.12548e-15	-3.91086	1	1
Solyc01g006420	SL3.0ch01	1027975	1029975	+	8086	11044	8328	12071	42.269	40.826	-1.44316	0.0022862	-5.12548e-15	-3.91086	1	1
Solyc01g006545	SL3.0ch01	1126682	1128682	-	1748	4999	1238	3990	25.908	23.68	-2.22763	0.00315784	-5.12548e-15	-3.87428	1	1
Solyc01g006550	SL3.0ch01	1126731	1128731	-	1792	5095	1260	4122	26.02	23.411	-2.60867	0.0006395	0.439538	2.21463	0.556207	1
Solyc01g006620	SL3.0ch01	1219101	1221101	-	2360	10143	2000	9582	18.875	17.268	-1.6073	0.00081122	-5.12548e-15	-3.69072	1	1
Solyc01g006690	SL3.0ch01	1270429	1272429	-	7816	11550	7469	11486	40.359	39.404	-0.955542	0.0278933	-0.857101	1.93278	0.133588	1
Solyc01g006850	SL3.0ch01	1415006	1417006	+	6015	8939	5527	9183	40.223	37.573	-2.65027	2.64665e-06	-0.698777	1.02702	0.181566	1
Solyc01g007010	SL3.0ch01	1568975	1570975	+	2332	6857	2188	7114	25.378	23.522	-1.85635	0.00211597	0.371965	2.58387	0.774608	1
Solyc01g007050	SL3.0ch01	1591140	1593140	-	4011	10541	4247	11886	27.563	26.325	-1.2383	0.00822477	-2.30264	-3.22548	0.448422	1
Solyc01g007150	SL3.0ch01	1720369	1722369	-	6694	12486	6228	13778	34.901	31.131	-3.77028	4.36947e-15	-0.0760302	6.72651	0.787635	1
Solyc01g007160	SL3.0ch01	1725075	1727075	+	10089	11480	11050	13455	46.775	45.093	-1.68263	0.000215603	0.413741	0.182678	0.581541	1
Solyc01g007190	SL3.0ch01	1767139	1769139	+	2244	6980	1886	6480	24.328	22.544	-1.78421	0.00325982	1.39342	3.6497	0.00196192	0.098976
Solyc01g007800	SL3.0ch01	1888876	1890876	+	5689	10989	5705	11774	34.111	32.639	-1.47164	0.00241847	-1.81148	-3.65929	1	1
Solyc01g007830	SL3.0ch01	1938784	1940784	-	3371	9023	2893	8467	27.199	25.467	-1.7321	0.00158498	0.102496	-2.44535	1	1
Solyc01g007860	SL3.0ch01	1957531	1959531	-	3941	9666	3626	10936	28.963	24.9	-4.06261	3.00372e-14	0.0712337	6.0934	0.804103	1
Solyc01g007890	SL3.0ch01	1998989	2000989	-	1391	13101	1109	12922	9.598	7.904	-1.69447	4.45857e-07	-0.76643	0.617487	0.34119	1
Solyc01g007920	SL3.0ch01	2047562	2049562	+	5189	7922	5525	9005	39.577	38.025	-1.55268	0.00473392	-0.185417	5.83983	0.54104	1
Solyc01g008230	SL3.0ch01	2295195	2297195	-	4004	10796	3540	11649	27.054	23.306	-3.74771	1.46386e-13	0.0817568	6.05417	0.756303	1
Solyc01g008460	SL3.0ch01	2481622	2483622	-	7172	7227	7706	8294	49.809	48.163	-1.64651	0.00256609	0.52186	4.23323	0.0999424	0.898746
Solyc01g008490	SL3.0ch01	2514234	2516234	-	67	567	78	1072	10.568	6.783	-3.78521	0.00380974	0.153454	3.65429	0.660614	1
Solyc01g008493	SL3.0ch01	2517795	2519795	-	2725	8316	3243	12008	24.681	21.264	-3.41656	1.10637e-10	0.130409	2.67988	0.782845	1
Solyc01g008530	SL3.0ch01	2571653	2573653	-	4083	6212	4617	7652	39.66	37.631	-2.0286	0.001178	0.729185	1.66212	0.189961	1
Solyc01g008680	SL3.0ch01	2674333	2676333	-	2806	8480	1757	5888	24.863	22.982	-1.88032	0.00190588	-0.956742	0.735163	0.217009	1
Solyc01g008700	SL3.0ch01	2685791	2687791	-	5495	9074	5487	10228	37.717	34.916	-2.80138	4.24621e-07	0.341871	6.063	0.403663	1
Solyc01g008770	SL3.0ch01	2728760	2730760	+	9409	10154	9355	10982	48.096	46	-2.09599	2.35252e-05	0.207919	5.22956	0.469933	1
Solyc01g008800	SL3.0ch01	2774775	2776775	-	7401	8552	7491	10036	46.393	42.74	-3.65276	2.80908e-11	-1.88957	-1.01086	0.0671105	0.773437
Solyc01g008810	SL3.0ch01	2774775	2776775	-	7401	8552	7491	10036	46.393	42.74	-3.65276	2.80908e-11	0.926798	1.43634	0.0838242	0.843257
Solyc01g008820	SL3.0ch01	2776260	2778260	+	5469	9137	4524	8626	37.444	34.403	-3.04047	1.53191e-07	0.329442	5.7268	0.245578	1
Solyc01g008880	SL3.0ch01	2835494	2837494	-	3137	11892	3580	15060	20.873	19.206	-1.66697	0.000109089	3.79821	-3.50504	0.20532	1
Solyc01g008940	SL3.0ch01	2890927	2892927	+	1124	3914	948	3828	22.31	19.849	-2.46119	0.00185814	-7.1278	-2.67371	5.2919e-05	0.00657224
Solyc01g008980	SL3.0ch01	2927000	2929000	+	1306	5549	1514	6947	19.052	17.894	-1.15792	0.033225	0.191444	0.849862	0.725088	1
Solyc01g008990	SL3.0ch01	2935512	2937512	+	181	2499	125	2384	6.754	4.982	-1.77167	0.0045818	0.363452	4.25565	0.224631	1
Solyc01g009000	SL3.0ch01	2944501	2946501	+	292	3360	74	2274	7.996	3.152	-4.844	3.85378e-15	0.158942	5.36564	0.578958	1
Solyc01g009010	SL3.0ch01	2946699	2948699	+	339	4412	269	4248	7.135	5.955	-1.18006	0.0124883	0.23545	5.99752	0.494075	1
Solyc01g009090	SL3.0ch01	3042442	3044442	-	5286	7894	6520	10362	40.106	38.621	-1.48521	0.00526248	-0.0803422	6.29009	0.779087	1
Solyc01g009120	SL3.0ch01	3077562	3079562	-	1322	2683	1386	3337	33.009	29.346	-3.66298	0.000178002	-0.123475	4.0662	0.705952	1
Solyc01g009190	SL3.0ch01	3168921	3170921	+	4233	3717	5089	4867	53.245	51.115	-2.13038	0.00280985	1.14539	-3.34744	0.726578	1
Solyc01g009420	SL3.0ch01	3553649	3555649	+	9270	9916	9632	10999	48.316	46.687	-1.62946	0.000781348	0.408059	8.58766	0.136903	1
Solyc01g009510	SL3.0ch01	3704286	3706286	+	4675	5148	4421	5263	47.592	45.653	-1.93976	0.00392587	-5.92653	-3.21707	0.0287252	0.519537
Solyc01g009610	SL3.0ch01	3780779	3782779	-	5289	9929	5018	10617	34.755	32.095	-2.66024	7.32588e-07	0.324592	4.24826	0.343016	1
Solyc01g009630	SL3.0ch01	3797042	3799042	+	3318	6688	3065	7701	33.16	28.469	-4.69085	4.4628e-13	0.0334853	4.96516	0.901782	1
Solyc01g009750	SL3.0ch01	4060684	4062684	-	6669	6270	7138	7297	51.542	49.449	-2.09259	0.000388095	0.357826	7.6776	0.228472	1
Solyc01g009770	SL3.0ch01	4093600	4095600	-	4971	7659	4580	7743	39.359	37.166	-2.1924	0.000267459	-1.15228	2.9834	0.0295209	0.527687
Solyc01g009935	SL3.0ch01	4462692	4464692	+	1164	4199	672	4536	21.704	12.903	-8.80104	2.37767e-32	-5.12548e-15	-3.91086	1	1
Solyc01g009980	SL3.0ch01	4518809	4520809	+	5430	8738	4294	7412	38.326	36.682	-1.64376	0.00397794	-5.12548e-15	-3.91086	1	1
Solyc01g010050	SL3.0ch01	4617914	4619914	+	1021	5732	765	5305	15.119	12.603	-2.51624	3.14588e-05	-0.321444	5.1104	0.301038	1
Solyc01g010055	SL3.0ch01	4618998	4620998	+	1051	6954	837	7366	13.129	10.204	-2.92571	8.69815e-09	-3.23591	-2.59162	0.0910662	0.868601
Solyc01g010315	SL3.0ch01	5088779	5090779	-	6491	9494	6383	9878	40.607	39.253	-1.35339	0.00736567	-5.12548e-15	-3.59863	1	1
Solyc01g010470	SL3.0ch01	5304791	5306791	+	3111	4982	3149	5435	38.441	36.685	-1.7561	0.0105702	-0.294691	-1.65173	0.777607	1
Solyc01g010465	SL3.0ch01	5305229	5307229	+	1960	3489	1836	3638	35.97	33.54	-2.42953	0.0046429	0.0159029	-2.81287	1	1
Solyc01g010508	SL3.0ch01	5448977	5450977	+	1614	3437	1811	4198	31.954	30.138	-1.81594	0.0209251	-2.13901	-3.17088	0.385058	1
Solyc01g010525	SL3.0ch01	5482425	5484425	+	492	2829	348	3106	14.815	10.075	-4.73954	4.16443e-09	-5.03882	-3.38419	0.0787166	0.823054
Solyc01g010835	SL3.0ch01	6180410	6182410	-	3778	6832	4149	8026	35.608	34.078	-1.52989	0.00874557	-0.13078	2.02268	0.798299	1
Solyc01g010850	SL3.0ch01	6235529	6237529	-	3939	7188	3299	6682	35.4	33.053	-2.34758	0.000239481	-5.12548e-15	-3.91086	1	1
Solyc01g010870	SL3.0ch01	6256909	6258909	-	5042	7946	5225	8843	38.82	37.141	-1.67942	0.00277885	0.446601	7.58727	0.146364	1
Solyc01g010880	SL3.0ch01	6263981	6265981	-	2014	1790	1600	1646	52.944	49.291	-3.65283	0.00151691	-0.280323	4.08155	0.562351	1
Solyc01g010933	SL3.0ch01	6387420	6389420	+	4749	8365	4674	8802	36.213	34.684	-1.52932	0.00531202	-1.96164	-3.32954	1	1
Solyc01g010930	SL3.0ch01	6417174	6419174	-	5259	10221	4763	10913	33.973	30.384	-3.58884	1.83286e-11	-1.67148	0.745291	0.00564195	0.199606
Solyc01g011060	SL3.0ch01	6986946	6988946	-	2417	3258	2027	3107	42.59	39.482	-3.10842	0.000719644	-5.12548e-15	-3.91086	1	1
Solyc01g011096	SL3.0ch01	7801032	7803032	-	2114	3854	1509	3291	35.422	31.438	-3.98475	1.16164e-05	-5.12548e-15	-3.91086	1	1
Solyc01g011098	SL3.0ch01	7928483	7930483	-	1024	4450	848	4265	18.707	16.585	-2.12144	0.00261247	-5.12548e-15	-3.91086	1	1
Solyc01g011170	SL3.0ch01	7956575	7958575	-	2341	7662	1979	7048	23.403	21.923	-1.47986	0.0084381	-5.12548e-15	-3.91086	1	1
Solyc01g011397	SL3.0ch01	8853338	8855338	+	1650	4908	1455	5012	25.16	22.499	-2.66127	0.000265607	-5.12548e-15	-3.91086	1	1
Solyc01g012540	SL3.0ch01	9577178	9579178	-	1619	4561	1271	3873	26.197	24.708	-1.48901	0.0350828	-5.12548e-15	-3.91086	1	1
Solyc01g012550	SL3.0ch01	9591204	9593204	+	1060	3308	387	1605	24.267	19.428	-4.83969	1.49331e-05	-5.12548e-15	-3.91086	1	1
Solyc01g012560	SL3.0ch01	9609113	9611113	+	786	1776	689	1723	30.679	28.566	-2.11365	0.0495703	-5.12548e-15	-3.91086	1	1
Solyc01g012610	SL3.0ch01	9693640	9695640	+	783	2277	428	1723	25.588	19.898	-5.69051	1.50613e-06	-5.12548e-15	-3.91086	1	1
Solyc01g012680	SL3.0ch01	9778486	9780486	+	552	1695	557	2070	24.566	21.203	-3.3632	0.00328104	-5.12548e-15	-3.91086	1	1
Solyc01g013760	SL3.0ch01	10078159	10080159	-	1123	2729	799	2466	29.154	24.472	-4.68202	8.48386e-06	-5.12548e-15	-3.91086	1	1
Solyc01g013860	SL3.0ch01	10189659	10191659	+	839	2214	888	2668	27.481	24.972	-2.50929	0.0114626	-5.12548e-15	-3.91086	1	1
Solyc01g014010	SL3.0ch01	10875001	10877001	+	1427	5627	1197	5204	20.23	18.7	-1.52945	0.0139004	-5.12548e-15	-3.91086	1	1
Solyc01g014075	SL3.0ch01	11163804	11165804	-	3370	5329	3013	5194	38.74	36.713	-2.02752	0.00391014	-5.12548e-15	-3.91086	1	1
Solyc01g014090	SL3.0ch01	11213848	11215848	+	1689	4725	639	2414	26.333	20.93	-5.40279	1.0729e-08	-5.12548e-15	-3.91086	1	1
Solyc01g014270	SL3.0ch01	11888252	11890252	+	6417	6295	6450	6665	50.48	49.18	-1.29953	0.0193429	-0.0801598	4.38718	0.794969	1
Solyc01g014360	SL3.0ch01	12157214	12159214	-	1789	6447	1781	6938	21.722	20.427	-1.29506	0.0204445	-5.12548e-15	-3.91086	1	1
Solyc01g014410	SL3.0ch01	13447094	13449094	+	2489	6108	2339	6303	28.952	27.065	-1.88647	0.00355557	-5.12548e-15	-3.91086	1	1
Solyc01g014460	SL3.0ch01	13858627	13860627	-	3647	5982	4048	7587	37.875	34.792	-3.08359	3.11665e-06	-5.12548e-15	-3.91086	1	1
Solyc01g014490	SL3.0ch01	13922467	13924467	-	4572	7671	3975	7202	37.344	35.564	-1.77968	0.00295414	-0.166181	4.18434	0.576537	1
Solyc01g014530	SL3.0ch01	13963682	13965682	-	4597	6181	4463	6439	42.652	40.937	-1.71426	0.00615669	-0.0716726	-1.72713	1	1
Solyc01g014535	SL3.0ch01	14023523	14025523	+	819	2350	781	2641	25.844	22.823	-3.0212	0.00267765	-5.12548e-15	-3.91086	1	1
Solyc01g014564	SL3.0ch01	14356992	14358992	+	2550	9058	1995	7495	21.968	21.022	-0.94548	0.0465125	-5.12548e-15	-3.91086	1	1
Solyc01g014725	SL3.0ch01	14609128	14611128	+	738	2828	309	1457	20.695	17.497	-3.19829	0.00355482	-5.12548e-15	-3.91086	1	1
Solyc01g014770	SL3.0ch01	14972835	14974835	+	1931	7122	2020	8130	21.33	19.901	-1.42847	0.00831149	-5.12548e-15	-3.91086	1	1
Solyc01g014790	SL3.0ch01	15047018	15049018	-	978	2220	419	1080	30.582	27.952	-2.62965	0.0338396	-5.12548e-15	-3.91086	1	1
Solyc01g014830	SL3.0ch01	15503442	15505442	-	829	2712	635	2383	23.411	21.04	-2.37104	0.011807	-5.12548e-15	-3.91086	1	1
Solyc01g015060	SL3.0ch01	16663799	16665799	-	2807	6539	1962	5100	30.034	27.782	-2.25174	0.0010843	-5.12548e-15	-3.91086	1	1
Solyc01g015085	SL3.0ch01	16741535	16743535	+	6966	8333	6940	9076	45.532	43.332	-2.20072	7.0034e-05	-5.12548e-15	-3.91086	1	1
Solyc01g015170	SL3.0ch01	17320419	17322419	-	2257	7740	1772	6885	22.577	20.469	-2.10779	0.000351336	-5.12548e-15	-3.91086	1	1
Solyc01g015285	SL3.0ch01	18449626	18451626	-	1974	5773	1535	5033	25.481	23.371	-2.10994	0.00212952	-5.12548e-15	-3.91086	1	1
Solyc01g016435	SL3.0ch01	19665105	19667105	-	2952	8377	3224	10044	26.057	24.299	-1.75796	0.00103671	-5.12548e-15	-3.91086	1	1
Solyc01g016455	SL3.0ch01	19933831	19935831	-	1035	2904	603	2075	26.276	22.517	-3.7589	0.000347507	-0.142541	2.55628	0.83499	1
Solyc01g016550	SL3.0ch01	20424155	20426155	-	3030	7766	1983	7025	28.066	22.014	-6.05218	4.85308e-22	-5.12548e-15	-3.74789	1	1
Solyc01g016580	SL3.0ch01	20498873	20500873	+	3689	9078	3365	9198	28.895	26.785	-2.1098	0.000135249	-5.12548e-15	-3.91086	1	1
Solyc01g016660	SL3.0ch01	20895446	20897446	+	1937	5594	1836	5714	25.72	24.318	-1.40248	0.0243162	-5.12548e-15	-3.91086	1	1
Solyc01g016720	SL3.0ch01	21668327	21670327	-	2001	6147	1633	6101	24.558	21.115	-3.44361	2.55955e-07	-5.12548e-15	-3.11431	1	1
Solyc01g016740	SL3.0ch01	21885371	21887371	-	3824	6989	3342	6613	35.365	33.571	-1.79377	0.00403478	-5.12548e-15	-3.91086	1	1
Solyc01g016800	SL3.0ch01	22153123	22155123	-	2755	5727	2527	5828	32.481	30.245	-2.23518	0.0011559	-3.05832	-3.80323	0.522497	1
Solyc01g016890	SL3.0ch01	22665080	22667080	+	845	3682	414	2321	18.666	15.137	-3.52867	9.30065e-05	-5.12548e-15	-3.91086	1	1
Solyc01g016985	SL3.0ch01	23412280	23414280	+	1927	4807	1476	4377	28.616	25.218	-3.39814	1.66371e-05	-5.12548e-15	-3.91086	1	1
Solyc01g017030	SL3.0ch01	23464248	23466248	+	2738	5591	1886	4459	32.873	29.724	-3.1489	3.7359e-05	-5.12548e-15	-3.91086	1	1
Solyc01g017050	SL3.0ch01	23707810	23709810	+	1975	6491	1376	5131	23.329	21.146	-2.18215	0.00100964	-0.8828	-0.472182	0.444062	1
Solyc01g017280	SL3.0ch01	23820304	23822304	-	2328	6119	1725	5817	27.56	22.872	-4.68816	1.65788e-11	-5.12548e-15	-3.91086	1	1
Solyc01g017290	SL3.0ch01	23820696	23822696	-	2508	7392	2153	7193	25.333	23.037	-2.29674	0.00015652	-5.12548e-15	-3.91086	1	1
Solyc01g017530	SL3.0ch01	23884431	23886431	-	1369	3560	417	1403	27.774	22.912	-4.86231	4.18399e-05	2.08057	-2.1897	0.221426	1
Solyc01g017650	SL3.0ch01	24628936	24630936	+	1853	4244	1603	4232	30.392	27.472	-2.91985	0.000311932	-5.12548e-15	-3.91086	1	1
Solyc01g017735	SL3.0ch01	24936777	24938777	+	2249	8775	2029	8375	20.401	19.502	-0.898829	0.0472285	-5.12548e-15	-3.91086	1	1
Solyc01g017840	SL3.0ch01	25673524	25675524	+	2868	5759	2255	5098	33.244	30.668	-2.57671	0.000363824	-5.12548e-15	-3.91086	1	1
Solyc01g017950	SL3.0ch01	26465973	26467973	+	1825	3045	1256	2279	37.474	35.53	-1.94392	0.034069	-5.12548e-15	-3.91086	1	1
Solyc01g017960	SL3.0ch01	26478847	26480847	+	2633	5750	1869	5157	31.409	26.601	-4.80761	8.51849e-11	-5.12548e-15	-3.91086	1	1
Solyc01g018025	SL3.0ch01	26774919	26776919	-	1811	2491	1173	1850	42.097	38.803	-3.29419	0.00284987	-5.12548e-15	-3.91086	1	1
Solyc01g018040	SL3.0ch01	26775779	26777779	+	3343	4437	2347	3560	42.969	39.733	-3.23663	0.00010916	-5.12548e-15	-3.91086	1	1
Solyc01g018070	SL3.0ch01	27300754	27302754	-	2098	4910	1816	4554	29.937	28.509	-1.42858	0.0343401	-5.12548e-15	-3.91086	1	1
Solyc01g020125	SL3.0ch01	27720339	27722339	+	1240	2201	592	1434	36.036	29.22	-6.8159	2.50388e-07	-1.08333	-1.95811	0.355008	1
Solyc01g020150	SL3.0ch01	27720863	27722863	+	421	1523	35	986	21.656	3.428	-18.2284	5.77817e-46	-1.08742	-1.53464	0.291063	1
Solyc01g020340	SL3.0ch01	29246106	29248106	+	3637	8686	3633	9962	29.514	26.723	-2.79086	6.18216e-07	0.131245	-0.973455	0.897607	1
Solyc01g020360	SL3.0ch01	29342396	29344396	-	2614	7689	2599	8173	25.371	24.127	-1.24388	0.0187822	-5.12548e-15	-3.91086	1	1
Solyc01g020378	SL3.0ch01	29896586	29898586	-	1751	9324	1393	8221	15.81	14.489	-1.3211	0.0048003	-1.48607	-1.23714	0.314947	1
Solyc01g020400	SL3.0ch01	29896467	29898467	+	1642	9488	1403	8702	14.753	13.884	-0.868704	0.0346203	-5.12548e-15	-3.91086	1	1
Solyc01g020408	SL3.0ch01	30367174	30369174	+	600	2253	367	1800	21.03	16.936	-4.09464	0.000190883	-5.12548e-15	-3.91086	1	1
Solyc01g020460	SL3.0ch01	30835288	30837288	-	4861	8434	3678	7039	36.563	34.319	-2.24331	0.000222911	-5.12548e-15	-3.91086	1	1
Solyc01g020500	SL3.0ch01	30954014	30956014	+	1706	5719	1614	5961	22.976	21.307	-1.6695	0.00776062	0.158928	0.963626	0.754979	1
Solyc01g021610	SL3.0ch01	32000533	32002533	-	2956	7221	2837	7452	29.046	27.573	-1.47275	0.0107817	-5.12548e-15	-3.91086	1	1
Solyc01g022750	SL3.0ch01	32846171	32848171	-	4910	3727	6008	4896	56.848	55.099	-1.7494	0.0082082	0.577769	5.92716	0.116108	0.949655
Solyc01g033990	SL3.0ch01	35316300	35318300	+	4125	8370	3894	8320	33.013	31.881	-1.13176	0.029096	-5.12548e-15	-3.91086	1	1
Solyc01g028980	SL3.0ch01	39013065	39015065	+	2694	4724	1500	2831	36.317	34.634	-1.68303	0.0324244	-5.12548e-15	-3.91086	1	1
Solyc01g028983	SL3.0ch01	39355924	39357924	-	1957	4544	1891	4853	30.103	28.04	-2.06332	0.0053039	-5.12548e-15	-3.91086	1	1
Solyc01g028960	SL3.0ch01	39355924	39357924	-	1957	4544	1891	4853	30.103	28.04	-2.06332	0.0053039	-5.12548e-15	-3.91086	1	1
Solyc01g028840	SL3.0ch01	41101706	41103706	-	2716	3631	2296	3308	42.792	40.971	-1.82113	0.0227118	-5.12548e-15	-3.91086	1	1
Solyc01g044370	SL3.0ch01	43236198	43238198	-	27	510	30	923	5.028	3.148	-1.87998	0.0428304	0.0628426	0.913002	0.929591	1
Solyc01g044510	SL3.0ch01	44076938	44078938	-	3206	8547	3269	9264	27.278	26.083	-1.195	0.0188214	-5.12548e-15	-3.91086	1	1
Solyc01g044520	SL3.0ch01	44092014	44094014	+	2248	3105	1989	3106	41.995	39.038	-2.95687	0.00136741	0.0605945	0.481281	0.969153	1
Solyc01g044540	SL3.0ch01	44229541	44231541	+	6361	5133	7424	6455	55.342	53.491	-1.85103	0.00204957	0.829531	-0.413808	0.242202	1
Solyc01g047580	SL3.0ch01	44777994	44779994	-	4652	11026	4205	10674	29.672	28.261	-1.41084	0.00393247	-5.12548e-15	-3.91086	1	1
Solyc01g047590	SL3.0ch01	44888424	44890424	-	7451	17025	6864	16569	30.442	29.292	-1.15004	0.00357958	0.0501524	-3.19005	1	1
Solyc01g049720	SL3.0ch01	46034061	46036061	-	3260	7530	2954	7252	30.213	28.944	-1.2694	0.0224445	-5.12548e-15	-3.91086	1	1
Solyc01g049845	SL3.0ch01	46595576	46597576	+	4396	9758	4495	10633	31.058	29.713	-1.34524	0.00711257	-5.12548e-15	-3.91086	1	1
Solyc01g049880	SL3.0ch01	46641245	46643245	-	3894	9917	2955	9015	28.195	24.687	-3.5082	2.72802e-10	-2.76671	2.6559	1.0579e-05	0.00187322
Solyc01g049960	SL3.0ch01	47627525	47629525	-	8436	9656	5810	10610	46.628	35.384	-11.2447	2.1886e-98	0.0616547	5.45723	0.815613	1
Solyc01g049970	SL3.0ch01	47635890	47637890	-	3674	7296	3457	7232	33.491	32.342	-1.14968	0.0353256	-5.12548e-15	-3.91086	1	1
Solyc01g050047	SL3.0ch01	48282532	48284532	-	556	3762	425	3247	12.876	11.574	-1.30226	0.0388731	-0.733892	-1.47365	0.464909	1
Solyc01g055160	SL3.0ch01	50873177	50875177	+	2056	6230	2053	6662	24.813	23.557	-1.25585	0.0284483	-5.12548e-15	-3.91086	1	1
Solyc01g055200	SL3.0ch01	51678423	51680423	-	2293	8509	2221	9610	21.228	18.773	-2.45483	3.60743e-06	-5.12548e-15	-3.91086	1	1
Solyc01g056330	SL3.0ch01	53384799	53386799	-	1688	4010	1057	3381	29.624	23.817	-5.80739	9.0282e-11	-5.12548e-15	-3.42157	1	1
Solyc01g056570	SL3.0ch01	54707574	54709574	-	4422	5515	4345	6186	44.5	41.259	-3.24121	2.67759e-06	0.0289225	5.69302	0.919469	1
Solyc01g056625	SL3.0ch01	55017417	55019417	+	182	928	29	332	16.396	8.033	-8.36316	3.56638e-05	0.128867	3.55728	0.687397	1
Solyc01g056690	SL3.0ch01	55929996	55931996	-	6453	7691	7979	10120	45.624	44.085	-1.53828	0.00350044	-0.100675	4.36998	0.725985	1
Solyc01g056880	SL3.0ch01	57370151	57372151	+	4237	9291	3751	8928	31.32	29.584	-1.73587	0.00146225	-5.12548e-15	-3.91086	1	1
Solyc01g056883	SL3.0ch01	57384016	57386016	-	5928	12441	5538	13008	32.272	29.861	-2.41088	5.87927e-07	-5.12548e-15	-3.91086	1	1
Solyc01g056915	SL3.0ch01	57493467	57495467	-	1315	2430	1329	2779	35.113	32.352	-2.76198	0.00562701	-5.12548e-15	-3.91086	1	1
Solyc01g056950	SL3.0ch01	57635808	57637808	-	2631	7782	1518	5837	25.266	20.639	-4.62747	9.86393e-13	-5.12548e-15	-3.91086	1	1
Solyc01g056960	SL3.0ch01	57808965	57810965	+	2681	5718	2537	6039	31.92	29.583	-2.33791	0.000662382	-5.12548e-15	-3.91086	1	1
Solyc01g057080	SL3.0ch01	58284435	58286435	-	3926	10116	3917	10661	27.959	26.869	-1.08973	0.0204255	-0.578689	-2.43168	0.784503	1
Solyc01g057120	SL3.0ch01	59043047	59045047	-	2631	2519	2393	2478	51.087	49.127	-1.95989	0.0251505	-5.12548e-15	-3.91086	1	1
Solyc01g057130	SL3.0ch01	59051428	59053428	+	4250	6224	3855	6107	40.577	38.697	-1.87962	0.0037161	-5.12548e-15	-3.91086	1	1
Solyc01g057140	SL3.0ch01	59294384	59296384	+	1292	3443	1089	3273	27.286	24.966	-2.32055	0.00685325	-5.12548e-15	-3.91086	1	1
Solyc01g057260	SL3.0ch01	60236776	60238776	+	3389	7765	2917	7220	30.384	28.776	-1.60795	0.00604095	-0.364946	-0.431702	0.732037	1
Solyc01g057320	SL3.0ch01	60482351	60484351	-	1860	2651	1433	2525	41.233	36.205	-5.02739	2.04053e-06	-1.60694	-1.70585	0.270189	1
Solyc01g057330	SL3.0ch01	60490094	60492094	+	873	7481	641	8191	10.45	7.258	-3.19238	3.07034e-13	0.988901	-3.21283	0.689225	1
Solyc01g057420	SL3.0ch01	60874629	60876629	-	5491	9725	5231	9758	36.087	34.899	-1.18809	0.0163719	-5.12548e-15	-3.91086	1	1
Solyc01g057480	SL3.0ch01	61024567	61026567	+	596	2914	402	2320	16.98	14.769	-2.2115	0.0106258	-1.82623	-3.37859	1	1
Solyc01g057477	SL3.0ch01	61044362	61046362	+	4406	8076	4181	8057	35.299	34.164	-1.13475	0.0302507	0.722923	1.17835	0.150016	1
Solyc01g057600	SL3.0ch01	62807521	62809521	-	3088	14875	2817	14919	17.191	15.883	-1.30794	0.00060843	1.61671	-2.88144	0.237076	1
Solyc01g057650	SL3.0ch01	63386743	63388743	+	1109	2781	791	2487	28.509	24.131	-4.37843	2.54257e-05	-5.12548e-15	-3.91086	1	1
Solyc01g057680	SL3.0ch01	63458067	63460067	+	3044	5616	2994	5939	35.15	33.516	-1.63394	0.0123715	-3.22945	0.441378	0.30721	1
Solyc01g057700	SL3.0ch01	63475636	63477636	-	3270	5343	2307	4025	37.966	36.434	-1.53188	0.0284463	-5.12548e-15	-3.75208	1	1
Solyc01g057720	SL3.0ch01	63482322	63484322	-	2238	4681	1574	3601	32.346	30.415	-1.93026	0.0128626	-5.12548e-15	-3.34949	1	1
Solyc01g057745	SL3.0ch01	63555805	63557805	-	3438	7698	3240	7787	30.873	29.382	-1.49042	0.00866517	-5.12548e-15	-3.91086	1	1
Solyc01g057747	SL3.0ch01	63557203	63559203	-	4371	7821	4425	8434	35.851	34.412	-1.43968	0.00939575	-5.12548e-15	-3.91086	1	1
Solyc01g057780	SL3.0ch01	63864896	63866896	-	5732	10952	5299	10957	34.356	32.597	-1.75907	0.000504355	-0.295384	4.71809	0.375678	1
Solyc01g057800	SL3.0ch01	63899935	63901935	-	1827	5342	1458	4688	25.485	23.723	-1.76198	0.0104925	-5.12548e-15	-3.91086	1	1
Solyc01g057840	SL3.0ch01	64051434	64053434	-	1991	2962	995	1690	40.198	37.058	-3.14013	0.00434174	-0.109041	1.04498	0.835133	1
Solyc01g057856	SL3.0ch01	64115464	64117464	+	4522	7776	3984	7336	36.77	35.194	-1.57586	0.00679516	-5.12548e-15	-3.91086	1	1
Solyc01g057910	SL3.0ch01	64316122	64318122	+	3078	9457	2650	9966	24.555	21.005	-3.55017	2.96472e-11	-0.269577	2.9657	0.492445	1
Solyc01g058000	SL3.0ch01	64675599	64677599	-	1507	4509	1577	5065	25.05	23.743	-1.30702	0.0422918	-5.12548e-15	-3.91086	1	1
Solyc01g058080	SL3.0ch01	65008956	65010956	-	416	1619	281	1305	20.442	17.718	-2.72473	0.0211337	-5.12548e-15	-3.91086	1	1
Solyc01g058170	SL3.0ch01	65491261	65493261	+	102	1381	38	755	6.878	4.792	-2.08602	0.027005	-0.409848	2.0902	0.422709	1
Solyc01g058190	SL3.0ch01	65516969	65518969	+	2317	4560	1678	3711	33.692	31.138	-2.55451	0.00175063	-0.435596	4.20466	0.2038	1
Solyc01g058200	SL3.0ch01	65539397	65541397	-	305	3505	170	2469	8.005	6.442	-1.56342	0.0107566	0.412479	2.02657	0.39435	1
Solyc01g058210	SL3.0ch01	65559641	65561641	-	2198	6158	1742	5444	26.304	24.242	-2.06287	0.00202935	-7.17205	-1.41099	1.14674e-06	0.000301593
Solyc01g058327	SL3.0ch01	66260684	66262684	+	4372	5410	4724	6150	44.694	43.443	-1.25126	0.0350828	-5.12548e-15	-3.91086	1	1
Solyc01g058350	SL3.0ch01	66286085	66288085	-	2353	7072	2215	7524	24.966	22.744	-2.22191	0.000232522	-0.391584	-0.344541	0.613982	1
Solyc01g058360	SL3.0ch01	66327542	66329542	+	18830	21343	3259	8448	46.872	27.838	-19.0342	3.88244e-302	-5.12548e-15	-3.34951	1	1
Solyc01g058480	SL3.0ch01	66715559	66717559	+	3187	4164	2675	3742	43.355	41.686	-1.6685	0.02457	-5.12548e-15	-3.91086	1	1
Solyc01g058500	SL3.0ch01	66782775	66784775	-	835588	334480	41375	44916	71.414	47.948	-23.4654	0	-0.294201	6.20693	0.619214	1
Solyc01g058510	SL3.0ch01	66785932	66787932	-	3317	6733	844	2038	33.005	29.285	-3.71976	0.000118608	-5.12548e-15	-3.87428	1	1
Solyc01g058700	SL3.0ch01	67656464	67658464	-	2985	9310	2192	7722	24.278	22.11	-2.16801	0.000109217	-5.12548e-15	-3.91086	1	1
Solyc01g058740	SL3.0ch01	68166346	68168346	+	3857	9383	3984	10126	29.131	28.235	-0.896126	0.0480292	-5.12548e-15	-3.91086	1	1
Solyc01g059886	SL3.0ch01	69039130	69041130	+	2426	8785	1710	7123	21.639	19.359	-2.28024	5.93981e-05	-5.12548e-15	-3.91086	1	1
Solyc01g059900	SL3.0ch01	69159463	69161463	+	1437	3686	972	3559	28.05	21.452	-6.59775	1.37453e-13	-2.74435	-3.83322	0.672192	1
Solyc01g059920	SL3.0ch01	69263635	69265635	+	3149	4286	2985	4359	42.354	40.645	-1.70831	0.0182963	-0.309627	2.5463	0.492123	1
Solyc01g060043	SL3.0ch01	69410727	69412727	+	3174	7620	2842	7599	29.405	27.22	-2.18561	0.000289518	-5.12548e-15	-3.91086	1	1
Solyc01g060080	SL3.0ch01	69524484	69526484	-	4253	6013	4867	7710	41.428	38.698	-2.73039	2.35991e-05	0.146732	5.32462	0.627497	1
Solyc01g060160	SL3.0ch01	69632290	69634290	+	113	987	22	318	10.273	6.471	-3.80214	0.0216295	-1.04773	-3.41372	0.704705	1
Solyc01g060210	SL3.0ch01	69737200	69739200	-	271	3425	149	2708	7.332	5.215	-2.11699	0.000370133	-0.799777	0.0607125	0.38399	1
Solyc01g060284	SL3.0ch01	69996146	69998146	+	1850	5711	1371	4681	24.468	22.654	-1.81399	0.00743393	-5.12548e-15	-3.91086	1	1
Solyc01g060300	SL3.0ch01	69996146	69998146	+	1850	5711	1371	4681	24.468	22.654	-1.81399	0.00743393	-5.12548e-15	-3.91086	1	1
Solyc01g060288	SL3.0ch01	70030676	70032676	+	1316	4368	925	3675	23.153	20.109	-3.04401	0.00015858	-5.12548e-15	-3.91086	1	1
Solyc01g060316	SL3.0ch01	70141007	70143007	+	3320	8022	1693	5108	29.272	24.893	-4.37834	2.1743e-10	-5.12548e-15	-3.91086	1	1
Solyc01g060340	SL3.0ch01	70216873	70218873	-	117	526	80	529	18.196	13.136	-5.05967	0.00879714	-5.12548e-15	-3.91086	1	1
Solyc01g060350	SL3.0ch01	70259992	70261992	+	2211	6672	1926	6744	24.89	22.215	-2.67571	2.56809e-05	-1.80059	-3.62909	0.694345	1
Solyc01g060400	SL3.0ch01	70809838	70811838	-	568	4211	200	2213	11.885	8.288	-3.59689	2.03e-06	-5.12548e-15	-3.91086	1	1
Solyc01g065495	SL3.0ch01	71547608	71549608	+	1175	3785	779	4570	23.69	14.563	-9.12605	1.90661e-31	0.492729	3.83573	0.16478	1
Solyc01g065573	SL3.0ch01	71761457	71763457	+	4442	9030	3995	8535	32.972	31.883	-1.08861	0.0303326	-5.12548e-15	-3.91086	1	1
Solyc01g065590	SL3.0ch01	71771680	71773680	-	2516	4530	1738	4065	35.708	29.95	-5.75818	8.37981e-12	-5.12548e-15	-3.91086	1	1
Solyc01g065593	SL3.0ch01	71773395	71775395	+	3402	6291	2573	5348	35.097	32.483	-2.61422	0.000192917	-5.12548e-15	-3.91086	1	1
Solyc01g065597	SL3.0ch01	71776016	71778016	+	2273	3532	2137	3634	39.156	37.03	-2.12592	0.010116	-5.12548e-15	-3.83477	1	1
Solyc01g065650	SL3.0ch01	72048984	72050984	-	2063	3617	1543	2924	36.32	34.542	-1.77822	0.0322541	-5.12548e-15	-3.91086	1	1
Solyc01g065670	SL3.0ch01	72048979	72050979	+	2055	3653	1540	2961	36.002	34.215	-1.78748	0.0310575	-5.12548e-15	-3.91086	1	1
Solyc01g065820	SL3.0ch01	72223953	72225953	+	1544	6470	1535	6893	19.266	18.213	-1.05318	0.040741	3.45927	-3.73053	0.400172	1
Solyc01g065915	SL3.0ch01	72491979	72493979	-	1433	3652	551	1548	28.181	26.251	-1.93033	0.0461508	1.96374	-1.90577	0.170221	1
Solyc01g065970	SL3.0ch01	72540623	72542623	-	1879	5421	1349	4705	25.74	22.283	-3.45694	3.04705e-06	-5.12548e-15	-3.91086	1	1
Solyc01g066000	SL3.0ch01	72668242	72670242	+	3300	4184	2713	4395	44.094	38.168	-5.92581	6.20972e-13	0.66307	-2.22421	0.632493	1
Solyc01g066010	SL3.0ch01	72678019	72680019	-	1867	3290	1199	2473	36.203	32.653	-3.55071	0.000392638	0.450444	-2.25817	0.712056	1
Solyc01g066070	SL3.0ch01	72856749	72858749	-	5774	6012	5219	5925	48.99	46.832	-2.15795	0.000725487	-5.12548e-15	-3.83362	1	1
Solyc01g066207	SL3.0ch01	73489420	73491420	-	1942	4679	1471	4192	29.331	25.976	-3.35529	3.02658e-05	-5.12548e-15	-3.91086	1	1
Solyc01g066320	SL3.0ch01	73866162	73868162	+	3590	4041	3869	4803	47.045	44.615	-2.4301	0.00122932	-5.12548e-15	-3.91086	1	1
Solyc01g066390	SL3.0ch01	74059396	74061396	-	3250	7252	2785	6801	30.946	29.053	-1.8937	0.00220965	-5.12548e-15	-3.91086	1	1
Solyc01g066410	SL3.0ch01	74097035	74099035	-	3301	6658	3475	7799	33.146	30.823	-2.32277	0.000217212	-5.12548e-15	-3.91086	1	1
Solyc01g066420	SL3.0ch01	74104293	74106293	-	3406	8438	3090	8041	28.757	27.76	-0.996868	0.0446866	-5.12548e-15	-3.91086	1	1
Solyc01g066480	SL3.0ch01	74298379	74300379	-	1380	8476	1280	9173	14.002	12.245	-1.75633	0.000156157	0.310803	5.28242	0.288534	1
Solyc01g066490	SL3.0ch01	74299443	74301443	+	1236	5598	1113	5589	18.086	16.607	-1.47906	0.0124207	-2.9674	-2.89078	0.232296	1
Solyc01g066560	SL3.0ch01	74422357	74424357	+	315	3883	212	3113	7.504	6.376	-1.12763	0.0305638	-1.27618	-0.652705	0.156403	1
Solyc01g066690	SL3.0ch01	74669873	74671873	+	1829	3157	1335	2505	36.683	34.766	-1.91709	0.0310314	0.285958	5.93379	0.291356	1
Solyc01g066760	SL3.0ch01	74757675	74759675	-	6920	8803	7054	9748	44.012	41.983	-2.02886	0.000166374	1.59452	0.0275624	0.286299	1
Solyc01g067147	SL3.0ch01	75373624	75375624	-	4101	5005	4034	5237	45.036	43.512	-1.52421	0.0193213	-5.12548e-15	-3.91086	1	1
Solyc01g067200	SL3.0ch01	75427865	75429865	+	243	1850	140	1581	11.61	8.135	-3.47532	0.000297558	-5.12548e-15	-3.91086	1	1
Solyc01g067210	SL3.0ch01	75427865	75429865	+	243	1850	140	1581	11.61	8.135	-3.47532	0.000297558	-1.044	-0.499288	0.181486	1
Solyc01g067300	SL3.0ch01	75539137	75541137	-	5681	8499	5507	8827	40.063	38.419	-1.64433	0.00274391	1.39308	4.95438	0.0260515	0.496171
Solyc01g067295	SL3.0ch01	75556255	75558255	-	1885	6826	1337	5589	21.639	19.304	-2.33524	0.00024287	-3.15011	-0.28134	0.00549867	0.196873
Solyc01g067390	SL3.0ch01	75677303	75679303	+	2161	5823	2176	6671	27.067	24.596	-2.47073	0.000188566	0.133264	7.03044	0.640695	1
Solyc01g067417	SL3.0ch01	75806191	75808191	+	2566	7058	1871	5520	26.663	25.315	-1.34794	0.0243961	-5.12548e-15	-3.91086	1	1
Solyc01g067425	SL3.0ch01	75916263	75918263	-	621	512	363	429	54.81	45.833	-8.9769	9.08e-05	-5.12548e-15	-3.91086	1	1
Solyc01g067460	SL3.0ch01	75966844	75968844	+	3261	11390	3289	12465	22.258	20.877	-1.38063	0.00217249	-2.94824	1.47896	0.0062652	0.21444
Solyc01g067480	SL3.0ch01	75987587	75989587	+	2979	8987	2346	8121	24.896	22.413	-2.48224	1.12574e-05	-0.383007	3.55928	0.30478	1
Solyc01g067550	SL3.0ch01	76119659	76121659	-	2279	9966	1688	10090	18.612	14.332	-4.27987	1.00827e-18	0.282843	5.75344	0.381786	1
Solyc01g067560	SL3.0ch01	76182287	76184287	-	3100	7684	2961	9047	28.746	24.659	-4.08773	5.14365e-12	-0.0553846	4.80663	0.852869	1
Solyc01g067590	SL3.0ch01	76214325	76216325	-	12200	6889	11065	6793	63.911	61.961	-1.95013	8.30972e-05	0.234123	5.29191	0.389491	1
Solyc01g067620	SL3.0ch01	76261582	76263582	+	42	996	5	478	4.046	1.035	-3.01105	0.000780594	-0.0743294	2.8009	0.906931	1
Solyc01g067730	SL3.0ch01	76483330	76485330	+	3354	8734	3353	9524	27.747	26.039	-1.70785	0.00155071	0.203017	8.19574	0.554875	1
Solyc01g067860	SL3.0ch01	76648640	76650640	+	3758	7888	3460	8267	32.269	29.505	-2.76403	4.32406e-06	-5.12548e-15	-3.91086	1	1
Solyc01g067940	SL3.0ch01	76753985	76755985	-	57	1025	2	210	5.268	0.943	-4.32463	0.00205512	-0.110658	2.03613	0.843767	1
Solyc01g067945	SL3.0ch01	76832603	76834603	+	1371	2090	1373	2569	39.613	34.83	-4.78279	1.82284e-05	-4.64529	-3.56598	0.0874985	0.856143
Solyc01g068100	SL3.0ch01	77013470	77015470	-	2146	10570	2050	10970	16.876	15.745	-1.13137	0.00799201	0.153905	8.06111	0.630068	1
Solyc01g068260	SL3.0ch01	77191575	77193575	-	82	692	35	584	10.594	5.654	-4.94003	0.000615232	-0.0728901	3.20949	0.846835	1
Solyc01g068267	SL3.0ch01	77201717	77203717	-	4605	7367	4539	8554	38.465	34.667	-3.79737	6.35945e-10	0.733692	0.183461	0.456276	1
Solyc01g068290	SL3.0ch01	77256556	77258556	-	12903	11513	12081	11152	52.846	51.999	-0.847183	0.0318658	-0.0327782	4.00811	0.919796	1
Solyc01g068460	SL3.0ch01	77514073	77516073	-	4979	9202	4689	9904	35.11	32.132	-2.97851	9.88408e-08	-5.12548e-15	-3.91086	1	1
Solyc01g068475	SL3.0ch01	77527143	77529143	-	8583	11092	9151	12425	43.624	42.413	-1.21102	0.00736344	0.123655	2.0071	0.793359	1
Solyc01g079180	SL3.0ch01	78135368	78137368	+	3035	8140	3432	10824	27.159	24.074	-3.08476	2.65489e-08	-5.12548e-15	-3.91086	1	1
Solyc01g079270	SL3.0ch01	78220427	78222427	-	6181	7727	6027	8811	44.442	40.619	-3.82337	8.68599e-11	-5.12548e-15	-3.91086	1	1
Solyc01g079290	SL3.0ch01	78233616	78235616	-	1695	7401	1638	8514	18.635	16.135	-2.49981	4.56586e-06	1.24993	-0.241144	0.102516	0.905706
Solyc01g079390	SL3.0ch01	78331324	78333324	+	159	1244	92	1330	11.333	6.47	-4.8631	5.49591e-06	0.0111865	5.58338	0.972006	1
Solyc01g079510	SL3.0ch01	78415705	78417705	+	11184	9484	10564	9782	54.113	51.922	-2.19088	7.75661e-06	-0.0536505	6.16594	0.853202	1
Solyc01g079550	SL3.0ch01	78476109	78478109	+	68	1043	2	118	6.121	1.667	-4.45395	0.0286181	1.60999	-1.31736	0.124306	0.976648
Solyc01g079600	SL3.0ch01	78568218	78570218	-	1498	11400	1318	11262	11.614	10.477	-1.13726	0.0024416	-0.426415	6.75037	0.338394	1
Solyc01g079630	SL3.0ch01	78609058	78611058	+	9820	9428	10751	10941	51.018	49.562	-1.45624	0.0020258	0.0744927	-0.884355	0.948291	1
Solyc01g079660	SL3.0ch01	78645386	78647386	-	1301	6960	1174	7350	15.749	13.773	-1.97582	0.000233911	-5.12548e-15	-3.91086	1	1
Solyc01g079865	SL3.0ch01	78863234	78865234	-	132	1291	39	624	9.276	5.882	-3.39382	0.00457747	0.420843	3.15631	0.265517	1
Solyc01g079880	SL3.0ch01	78887702	78889702	-	2526	10366	2072	9577	19.594	17.787	-1.80661	0.000212321	0.306341	9.58865	0.313774	1
Solyc01g080010	SL3.0ch01	78995300	78997300	-	1260	8463	1412	10285	12.959	12.071	-0.887492	0.0254996	0.012094	5.42128	0.989251	1
Solyc01g080070	SL3.0ch01	79079067	79081067	-	3718	12035	3733	12919	23.602	22.418	-1.18413	0.00657431	0.277503	4.26229	0.460861	1
Solyc01g080080	SL3.0ch01	79110203	79112203	-	2208	8043	1854	8557	21.539	17.808	-3.73127	2.35421e-11	0.457913	5.13034	0.112153	0.939675
Solyc01g080100	SL3.0ch01	79113394	79115394	-	87	2643	22	1004	3.187	2.144	-1.04256	0.0475592	-1.73774	-0.331115	0.0909793	0.868395
Solyc01g080220	SL3.0ch01	79285546	79287546	+	5087	5776	5342	6334	46.829	45.752	-1.07671	0.0493511	0.056044	4.09671	0.947165	1
Solyc01g080270	SL3.0ch01	79370851	79372851	-	10465	9615	12152	12114	52.117	50.078	-2.03824	1.66823e-05	-0.267561	5.7263	0.31435	1
Solyc01g080370	SL3.0ch01	79463121	79465121	+	76	730	85	1218	9.429	6.523	-2.90587	0.00977716	1.88457	-3.87203	1	1
Solyc01g080840	SL3.0ch01	79997278	79999278	-	378	3087	336	3693	10.909	8.34	-2.56955	0.000130411	-0.537282	4.75865	0.259403	1
Solyc01g080910	SL3.0ch01	80101754	80103754	+	6641	9458	7605	12010	41.251	38.771	-2.47966	1.85335e-06	0.791144	7.21979	0.0145998	0.354911
Solyc01g080930	SL3.0ch01	80132798	80134798	-	2036	5740	1822	5711	26.183	24.187	-1.99622	0.00280948	0.111874	6.65767	0.658923	1
Solyc01g080950	SL3.0ch01	80137334	80139334	+	1407	7053	1290	7877	16.631	14.072	-2.55899	2.50055e-06	-5.12548e-15	-3.91086	1	1
Solyc01g081020	SL3.0ch01	80181397	80183397	-	635	2143	614	2399	22.858	20.378	-2.47981	0.0123858	-0.956066	-2.11208	0.46556	1
Solyc01g081060	SL3.0ch01	80240849	80242849	+	3552	11682	3307	12709	23.316	20.648	-2.66816	1.5073e-08	-0.122102	9.20955	0.791978	1
Solyc01g081080	SL3.0ch01	80281965	80283965	-	2724	9539	2031	8835	22.213	18.691	-3.52183	5.25459e-11	-5.12548e-15	-3.91086	1	1
Solyc01g081090	SL3.0ch01	80287067	80289067	-	2625	11200	2313	10629	18.987	17.872	-1.1153	0.0102342	-0.108833	-2.90335	1	1
Solyc01g081300	SL3.0ch01	80386953	80388953	+	6528	11821	6425	12106	35.577	34.672	-0.905239	0.0340956	0.153912	4.84665	0.60256	1
Solyc01g081360	SL3.0ch01	80441511	80443511	+	4835	9657	3651	7717	33.363	32.116	-1.24677	0.0181084	-5.12548e-15	-3.91086	1	1
Solyc01g081410	SL3.0ch01	80468854	80470854	-	10237	8444	12198	10516	54.799	53.703	-1.09643	0.0139607	-0.670661	1.63649	0.2122	1
Solyc01g081420	SL3.0ch01	80468995	80470995	+	10290	8191	12299	10255	55.679	54.531	-1.14746	0.0108848	0.765193	1.55693	0.381643	1
Solyc01g081430	SL3.0ch01	80497126	80499126	+	4647	10905	4581	11354	29.88	28.748	-1.13236	0.0145058	0.408359	2.56369	0.375907	1
Solyc01g081510	SL3.0ch01	80561001	80563001	+	4556	6906	4509	8230	39.749	35.395	-4.35349	4.63855e-12	0.0545491	3.28701	0.890788	1
Solyc01g081560	SL3.0ch01	80600428	80602428	+	7493	10782	7242	11966	41.001	37.703	-3.29833	9.60907e-11	0.437628	0.772479	0.477534	1
Solyc01g081580	SL3.0ch01	80630139	80632139	-	17	766	8	763	2.171	1.038	-1.13352	0.0491044	-5.12548e-15	-3.91086	1	1
Solyc01g081610	SL3.0ch01	80660571	80662571	-	4333	9231	4053	9788	31.945	29.283	-2.66229	1.72055e-06	-0.285112	6.14998	0.393166	1
Solyc01g073695	SL3.0ch01	80952515	80954515	+	3413	8857	3254	9735	27.816	25.052	-2.76384	6.61221e-07	-5.12548e-15	-3.91086	1	1
Solyc01g073740	SL3.0ch01	80989755	80991755	+	2903	12279	2158	12344	19.121	14.881	-4.24062	8.04068e-22	0.181837	6.98425	0.575326	1
Solyc01g073920	SL3.0ch01	81151771	81153771	-	4895	9060	5011	9958	35.077	33.476	-1.60118	0.00254327	0.0569873	3.52592	0.873472	1
Solyc01g074065	SL3.0ch01	81472056	81474056	-	1255	7430	1213	7746	14.45	13.539	-0.910744	0.0394586	-5.12548e-15	-3.91086	1	1
Solyc01g086670	SL3.0ch01	81509474	81511474	-	7025	8787	7023	9844	44.428	41.638	-2.79077	3.7086e-07	1.34102	4.5299	0.23725	1
Solyc01g086957	SL3.0ch01	81736859	81738859	+	539	3258	381	2703	14.195	12.354	-1.84133	0.0143541	0.145286	4.2907	0.619784	1
Solyc01g086960	SL3.0ch01	81750914	81752914	-	4659	7682	4158	7194	37.752	36.628	-1.1243	0.0365511	0.180523	8.87499	0.594709	1
Solyc01g086970	SL3.0ch01	81767133	81769133	-	9128	11739	9830	13247	43.744	42.597	-1.14719	0.00855191	0.317079	9.13983	0.340432	1
Solyc01g087030	SL3.0ch01	81830031	81832031	-	7726	8963	8614	10719	46.294	44.556	-1.73803	0.000648133	0.672917	5.80658	0.0442149	0.647432
Solyc01g087035	SL3.0ch01	81830256	81832256	-	8304	8647	9306	10395	48.988	47.236	-1.75208	0.000558634	0.633563	0.150506	0.406116	1
Solyc01g087070	SL3.0ch01	81890250	81892250	-	1722	7875	1298	8478	17.943	13.277	-4.66569	9.73883e-19	0.084811	2.79942	0.899276	1
Solyc01g087200	SL3.0ch01	82007408	82009408	-	108	2116	48	1721	4.856	2.713	-2.14272	0.000363026	-1.39817	1.85555	0.0302731	0.534984
Solyc01g087210	SL3.0ch01	82016312	82018312	-	3452	8900	3497	10940	27.947	24.222	-3.72441	7.01025e-12	0.105891	8.22187	0.749182	1
Solyc01g087240	SL3.0ch01	82051369	82053369	+	4004	6445	4212	7113	38.319	37.192	-1.1274	0.0417137	0.165216	5.16502	0.585991	1
Solyc01g087340	SL3.0ch01	82180221	82182221	-	2229	6240	1380	4660	26.32	22.848	-3.47184	1.70868e-06	0.291014	1.30541	0.509678	1
Solyc01g087430	SL3.0ch01	82279647	82281647	-	3333	12208	3102	12270	21.446	20.18	-1.26695	0.00371779	0.0783487	4.78414	0.808182	1
Solyc01g087440	SL3.0ch01	82281931	82283931	+	7576	6926	7970	7929	52.241	50.129	-2.11213	0.000173881	-0.539588	-2.83514	0.900262	1
Solyc01g087770	SL3.0ch01	82556650	82558650	-	26	412	5	506	5.936	0.978	-4.9576	1.9808e-05	-4.30163	-2.86944	0.123775	0.975364
Solyc01g087775	SL3.0ch01	82557412	82559412	-	39	607	6	601	6.037	0.988	-5.04868	8.54188e-07	-4.79791	-2.17036	0.000582468	0.0415843
Solyc01g087780	SL3.0ch01	82556704	82558704	+	26	412	5	506	5.936	0.978	-4.9576	1.9808e-05	-1.8404	-1.18319	0.132223	1
Solyc01g087820	SL3.0ch01	82575801	82577801	+	14777	8488	15724	9460	63.516	62.436	-1.07954	0.00778481	-0.40764	4.37524	0.509367	1
Solyc01g088030	SL3.0ch01	82756603	82758603	+	76	2809	57	3248	2.634	1.725	-0.909656	0.00950145	0.128807	2.09669	0.792508	1
Solyc01g088050	SL3.0ch01	82772932	82774932	+	4576	10699	4298	10602	29.957	28.846	-1.11181	0.018018	0.150047	1.34201	0.812394	1
Solyc01g088060	SL3.0ch01	82786231	82788231	-	11365	9978	10972	9945	53.249	52.455	-0.794368	0.048434	0.244799	2.36424	0.629107	1
Solyc01g088220	SL3.0ch01	82923737	82925737	+	16	58	0	30	21.622	0	-21.6216	0.0030041	-5.12548e-15	-3.91086	1	1
Solyc01g088320	SL3.0ch01	82989681	82991681	-	91	1374	9	852	6.212	1.045	-5.16631	1.52893e-10	0.0549818	-0.704432	0.969159	1
Solyc01g088323	SL3.0ch01	82992402	82994402	-	564	5667	426	4815	9.052	8.128	-0.923297	0.0395308	1.84938	-3.25106	0.557744	1
Solyc01g088560	SL3.0ch01	83213794	83215794	-	5914	9145	5801	10127	39.272	36.42	-2.85206	2.44833e-07	0.035069	6.58984	0.916174	1
Solyc01g088650	SL3.0ch01	83289591	83291591	-	1520	6211	1269	6073	19.661	17.284	-2.37699	0.000128664	0.363138	4.31288	0.241297	1
Solyc01g088660	SL3.0ch01	83295042	83297042	+	516	10557	462	11371	4.66	3.904	-0.755648	0.00295042	0.385663	7.69692	0.277447	1
Solyc01g088695	SL3.0ch01	83304850	83306850	+	53	443	12	179	10.685	6.283	-4.40276	0.0392811	-5.12548e-15	-3.91086	1	1
Solyc01g089850	SL3.0ch01	83451559	83453559	-	3091	9484	2785	9498	24.581	22.674	-1.9069	0.000299675	-1.13832	0.150673	0.264209	1
Solyc01g089860	SL3.0ch01	83469955	83471955	-	67	421	36	513	13.73	6.557	-7.17213	0.000118643	-0.0508407	2.21677	0.921954	1
Solyc01g089890	SL3.0ch01	83476834	83478834	-	65	776	19	418	7.729	4.348	-3.38107	0.0124455	-0.136821	2.08813	0.896533	1
Solyc01g090080	SL3.0ch01	83619330	83621330	-	266	2518	157	1793	9.555	8.051	-1.50332	0.0377253	-5.12548e-15	-3.79381	1	1
Solyc01g090120	SL3.0ch01	83635927	83637927	-	3687	9163	3135	8392	28.693	27.197	-1.49559	0.00555444	-5.12548e-15	-3.86883	1	1
Solyc01g090135	SL3.0ch01	83647132	83649132	-	24	435	3	418	5.229	0.713	-4.51617	4.38334e-05	-5.12548e-15	-3.91086	1	1
Solyc01g090200	SL3.0ch01	83694464	83696464	+	4497	11923	3999	11489	27.387	25.82	-1.56734	0.0010415	-0.336324	6.08609	0.231354	1
Solyc01g090210	SL3.0ch01	83727365	83729365	+	2463	4389	2422	4630	35.946	34.345	-1.60084	0.024431	0.140602	2.80898	0.848058	1
Solyc01g090225	SL3.0ch01	83744465	83746465	-	7675	8992	7736	9894	46.049	43.88	-2.16933	4.42744e-05	0.0853514	3.89423	0.804704	1
Solyc01g090270	SL3.0ch01	83809238	83811238	-	1427	10739	1250	11037	11.729	10.173	-1.55606	7.61271e-05	0.0385946	5.88588	0.890762	1
Solyc01g090300	SL3.0ch01	83837126	83839126	+	3239	9450	3220	10473	25.526	23.516	-2.01038	0.000116132	1.37663	-2.0277	0.403943	1
Solyc01g090430	SL3.0ch01	83994206	83996206	+	10285	7236	10126	7415	58.701	57.728	-0.973378	0.0320993	-0.0656508	3.65123	0.880075	1
Solyc01g090640	SL3.0ch01	84174203	84176203	-	4654	7189	4379	8137	39.297	34.987	-4.31026	5.64369e-12	0.127262	1.27376	0.828235	1
Solyc01g090645	SL3.0ch01	84174203	84176203	-	4654	7189	4379	8137	39.297	34.987	-4.31026	5.64369e-12	-0.733969	-3.05577	0.754603	1
Solyc01g090730	SL3.0ch01	84241484	84243484	+	4450	12035	4281	12974	26.994	24.81	-2.18404	4.27067e-06	-2.13023	1.26263	0.0281635	0.516083
Solyc01g090910	SL3.0ch01	84490320	84492320	+	288	4131	161	3596	6.517	4.285	-2.23198	7.79692e-06	0.102021	3.97156	0.817341	1
Solyc01g090950	SL3.0ch01	84541050	84543050	-	294	6190	178	4914	4.534	3.496	-1.03856	0.00310622	-1.32794	4.10728	0.000164991	0.0163022
Solyc01g090970	SL3.0ch01	84552478	84554478	-	216	2251	109	1486	8.756	6.834	-1.92172	0.0149544	-5.12548e-15	-3.91086	1	1
Solyc01g090980	SL3.0ch01	84551406	84553406	+	3067	2881	3223	3938	51.564	45.008	-6.55587	1.51305e-13	-0.107884	-3.4033	1	1
Solyc01g090990	SL3.0ch01	84563336	84565336	-	3245	7601	3571	8767	29.919	28.943	-0.975761	0.0493039	-0.106222	4.38712	0.718796	1
Solyc01g091050	SL3.0ch01	84645695	84647695	-	2963	7338	3082	9388	28.764	24.715	-4.04888	9.62058e-12	1.84891	-3.87283	1	1
Solyc01g091070	SL3.0ch01	84662802	84664802	+	952	5014	941	5958	15.957	13.64	-2.31743	0.000162525	0.39087	5.89524	0.135548	1
Solyc01g091130	SL3.0ch01	84714218	84716218	-	125	3708	67	3163	3.261	2.074	-1.18685	0.00158826	0.0228025	3.54359	0.959647	1
Solyc01g091210	SL3.0ch01	84772551	84774551	-	163	3619	112	3090	4.31	3.498	-0.812075	0.0401546	0.383256	4.72372	0.204094	1
Solyc01g091230	SL3.0ch01	84779638	84781638	+	2624	12658	2014	12195	17.171	14.174	-2.99641	2.67273e-12	-2.54931	-2.80873	0.0966471	0.888686
Solyc01g091260	SL3.0ch01	84800943	84802943	-	83	1999	28	1023	3.987	2.664	-1.32242	0.0318907	-0.101036	5.42978	0.81785	1
Solyc01g091300	SL3.0ch01	84815589	84817589	+	43	850	17	651	4.815	2.545	-2.27032	0.0124578	0.787245	-1.91235	0.600614	1
Solyc01g091385	SL3.0ch01	84889852	84891852	+	1405	4982	910	3899	21.998	18.923	-3.07496	5.3057e-05	0.0633694	1.59863	0.909828	1
Solyc01g091490	SL3.0ch01	84996727	84998727	-	4924	8433	3810	8303	36.865	31.454	-5.41076	2.91334e-19	-0.0219906	-2.35514	1	1
Solyc01g091560	SL3.0ch01	85043236	85045236	+	119	1713	17	442	6.496	3.704	-2.79193	0.0140128	-0.510935	-2.91275	0.821423	1
Solyc01g091600	SL3.0ch01	85064242	85066242	-	5123	9714	4556	9793	34.529	31.751	-2.7772	4.77323e-07	0.295071	4.91994	0.28465	1
Solyc01g091610	SL3.0ch01	85065154	85067154	+	5868	10229	5031	10241	36.454	32.943	-3.51136	9.75642e-11	0.0954477	0.987557	0.879067	1
Solyc01g091650	SL3.0ch01	85124563	85126563	-	7610	9928	8237	11188	43.391	42.404	-0.987374	0.0275486	0.0299795	6.01109	0.90756	1
Solyc01g091655	SL3.0ch01	85126383	85128383	+	7994	6917	8113	7490	53.611	51.996	-1.61502	0.00287904	-5.12548e-15	-3.91086	1	1
Solyc01g091690	SL3.0ch01	85150533	85152533	-	1870	10916	1644	11240	14.625	12.76	-1.86536	1.20735e-05	0.425817	7.92916	0.15144	1
Solyc01g091705	SL3.0ch01	85174986	85176986	+	91	1932	107	3217	4.498	3.219	-1.27926	0.0110102	0.689516	3.13027	0.103548	0.910507
Solyc01g091780	SL3.0ch01	85226438	85228438	+	341	3634	151	3401	8.579	4.251	-4.32749	3.15266e-14	-0.897802	3.77673	0.0207153	0.437136
Solyc01g091800	SL3.0ch01	85240379	85242379	-	76	2200	54	2190	3.339	2.406	-0.932774	0.0305505	-1.17864	3.10464	0.0053612	0.192917
Solyc01g092950	SL3.0ch01	85369033	85371033	+	1825	7611	1667	7454	19.341	18.277	-1.06432	0.0320914	-4.84838	-3.42139	0.119936	0.962502
Solyc01g093980	SL3.0ch01	85429781	85431781	+	513	5604	356	4445	8.386	7.415	-0.971342	0.0313948	-0.775438	0.126215	0.268269	1
Solyc01g094090	SL3.0ch01	85546030	85548030	+	12383	9057	8948	9104	57.757	49.568	-8.18861	3.20477e-58	-5.12548e-15	-3.91086	1	1
Solyc01g094110	SL3.0ch01	85561389	85563389	-	3005	6719	2566	6697	30.903	27.702	-3.20131	1.29644e-06	1.84891	-3.87283	1	1
Solyc01g094130	SL3.0ch01	85568651	85570651	-	94	1273	1	176	6.876	0.565	-6.3114	0.000127411	-3.09753	-3.17901	0.170276	1
Solyc01g094230	SL3.0ch01	85655983	85657983	+	3023	3600	3306	4448	45.644	42.636	-3.00791	0.000223001	0.0634992	-2.17483	1	1
Solyc01g094260	SL3.0ch01	85677897	85679897	+	2222	10831	1959	10593	17.023	15.607	-1.41583	0.00140401	-5.12548e-15	-3.91086	1	1
Solyc01g094280	SL3.0ch01	85694355	85696355	-	84	1574	16	1109	5.066	1.422	-3.64412	1.26031e-07	0.0863154	4.75515	0.79651	1
Solyc01g094390	SL3.0ch01	85772067	85774067	+	5777	7279	4975	6858	44.248	42.043	-2.20442	0.000328747	-5.12548e-15	-3.91086	1	1
Solyc01g094485	SL3.0ch01	85821829	85823829	+	214	3836	52	2394	5.284	2.126	-3.15803	1.3612e-10	0.814262	2.69475	0.0619783	0.74764
Solyc01g094560	SL3.0ch01	85865354	85867354	-	5080	10823	5189	11814	31.944	30.518	-1.42551	0.00319491	0.36719	-3.20922	0.866461	1
Solyc01g094590	SL3.0ch01	85900396	85902396	-	24	266	1	106	8.276	0.935	-7.34128	0.00280665	-0.156882	2.16228	0.719138	1
Solyc01g094790	SL3.0ch01	86069124	86071124	+	4208	11878	3906	11684	26.159	25.055	-1.10487	0.0133204	-0.713358	7.62746	0.092469	0.873134
Solyc01g094835	SL3.0ch01	86122311	86124311	-	3928	8974	3610	8787	30.445	29.12	-1.32494	0.0116455	-0.424933	2.77939	0.358383	1
Solyc01g094890	SL3.0ch01	86174418	86176418	-	6459	8230	6171	8424	43.972	42.282	-1.69008	0.00219302	-1.76161	-1.20307	0.0981507	0.893997
Solyc01g094940	SL3.0ch01	86216130	86218130	+	3469	10129	3225	10708	25.511	23.146	-2.36462	4.45042e-06	0.2084	4.92307	0.498583	1
Solyc01g094960	SL3.0ch01	86230631	86232631	+	2704	7430	2694	9109	26.682	22.825	-3.85775	5.8258e-11	0.177484	3.95048	0.632418	1
Solyc01g094990	SL3.0ch01	86245547	86247547	+	5396	9404	5650	10593	36.459	34.784	-1.67524	0.00134923	0.643997	-2.78942	0.785083	1
Solyc01g095000	SL3.0ch01	86251821	86253821	-	183	3981	115	3300	4.395	3.367	-1.02732	0.0127395	-0.458959	3.95619	0.295364	1
Solyc01g095110	SL3.0ch01	86380674	86382674	-	5472	6079	6345	8392	47.373	43.055	-4.31763	5.04863e-12	-0.387147	2.3439	0.372455	1
Solyc01g095120	SL3.0ch01	86379953	86381953	+	5313	4654	6211	7007	53.306	46.989	-6.31696	5.59104e-21	0.0284445	3.38311	0.948956	1
Solyc01g095170	SL3.0ch01	86403418	86405418	+	333	3092	300	3239	9.723	8.477	-1.24566	0.0353625	0.0738924	1.02091	0.924071	1
Solyc01g095220	SL3.0ch01	86434722	86436722	+	126	1768	63	1843	6.653	3.305	-3.34724	2.00484e-06	0.672567	3.52574	0.105301	0.913892
Solyc01g095260	SL3.0ch01	86463633	86465633	+	49	514	1	193	8.703	0.515	-8.18791	5.5187e-06	-5.12548e-15	-3.91086	1	1
Solyc01g095280	SL3.0ch01	86470192	86472192	+	1586	5739	1261	5222	21.652	19.451	-2.20101	0.000953724	-0.17415	3.92888	0.584688	1
Solyc01g095310	SL3.0ch01	86499966	86501966	+	445	3704	316	3188	10.725	9.018	-1.70721	0.00783952	1.4419	-2.0303	0.2565	1
Solyc01g095305	SL3.0ch01	86501727	86503727	+	645	4254	319	3330	13.166	8.742	-4.42383	1.6099e-10	-0.374444	5.13401	0.711779	1
Solyc01g095320	SL3.0ch01	86502562	86504562	+	649	4405	332	4121	12.841	7.456	-5.38567	9.04388e-18	-0.694331	10.921	0.373093	1
Solyc01g095370	SL3.0ch01	86521932	86523932	+	2723	13842	2618	14363	16.438	15.417	-1.02104	0.00608779	0.635721	4.37225	0.0829705	0.839278
Solyc01g095530	SL3.0ch01	86637952	86639952	-	1098	4788	865	4109	18.654	17.39	-1.264	0.0421713	0.00718509	5.60574	0.986597	1
Solyc01g095550	SL3.0ch01	86643907	86645907	+	198	4550	99	2870	4.17	3.334	-0.835721	0.0331511	3.08925	-2.99611	0.0879567	0.858605
Solyc01g095560	SL3.0ch01	86647244	86649244	+	195	354	189	548	35.519	25.645	-9.87462	0.000125234	0.428563	2.60506	0.343989	1
Solyc01g095570	SL3.0ch01	86656019	86658019	-	1363	10481	1192	10340	11.508	10.336	-1.17148	0.00263694	-5.12548e-15	-3.91086	1	1
Solyc01g095600	SL3.0ch01	86687845	86689845	+	227	4860	167	4321	4.462	3.721	-0.741321	0.0345684	-0.126349	1.77063	0.834064	1
Solyc01g095690	SL3.0ch01	86752465	86754465	+	2388	3965	2091	3973	37.589	34.482	-3.10635	0.000237262	-3.39529	1.43785	0.000257577	0.0230528
Solyc01g095695	SL3.0ch01	86759454	86761454	-	72	1878	12	533	3.692	2.202	-1.49047	0.0494614	-5.12548e-15	-3.91086	1	1
Solyc01g095715	SL3.0ch01	86778934	86780934	+	82	419	0	158	16.367	0	-16.3673	6.6275e-11	-3.51513	-3.65991	0.240575	1
Solyc01g095850	SL3.0ch01	86877247	86879247	-	66	733	75	1120	8.26	6.276	-1.98417	0.0431735	-5.12548e-15	-3.91086	1	1
Solyc01g095903	SL3.0ch01	86928326	86930326	-	41	580	8	262	6.602	2.963	-3.63929	0.0187164	-0.282166	0.0509715	1	1
Solyc01g096010	SL3.0ch01	86988974	86990974	-	18	758	3	522	2.32	0.571	-1.74816	0.00745373	-0.614092	4.04794	0.271802	1
Solyc01g096080	SL3.0ch01	87064713	87066713	+	4663	8535	4928	9911	35.331	33.21	-2.12133	0.000140425	0.203489	3.51179	0.645402	1
Solyc01g096090	SL3.0ch01	87078039	87080039	-	5412	10177	4688	9626	34.717	32.751	-1.96563	0.000240212	-0.241979	7.77241	0.440142	1
Solyc01g096130	SL3.0ch01	87119354	87121354	-	2617	10577	2530	10760	19.835	19.037	-0.797904	0.0481568	0.401507	5.41583	0.175448	1
Solyc01g096175	SL3.0ch01	87145560	87147560	+	76	2397	27	1703	3.073	1.561	-1.5125	0.00104474	-5.12548e-15	-3.72885	1	1
Solyc01g096197	SL3.0ch01	87164706	87166706	+	86	871	2	194	8.986	1.02	-7.96601	1.01845e-05	-5.12548e-15	-3.91086	1	1
Solyc01g096240	SL3.0ch01	87202793	87204793	+	3808	9532	3312	10857	28.546	23.375	-5.17075	4.37893e-22	-0.179156	6.09913	0.573143	1
Solyc01g096290	SL3.0ch01	87253245	87255245	+	840	7919	850	9640	9.59	8.103	-1.48718	0.000222471	0.557689	7.59965	0.096103	0.888014
Solyc01g096450	SL3.0ch01	87417110	87419110	+	8616	8665	8536	9740	49.858	46.706	-3.15216	3.65303e-09	0.270652	2.41126	0.594017	1
Solyc01g096630	SL3.0ch01	87564322	87566322	+	8	22	5	275	26.667	1.786	-24.881	2.58004e-06	0.397229	3.36909	0.362934	1
Solyc01g096650	SL3.0ch01	87571584	87573584	-	1504	5859	1097	6010	20.426	15.435	-4.99097	9.995e-15	-0.0344222	-2.49827	1	1
Solyc01g096670	SL3.0ch01	87574614	87576614	+	735	2966	700	3203	19.859	17.935	-1.92458	0.01685	-0.61651	0.130527	0.369211	1
Solyc01g096780	SL3.0ch01	87659929	87661929	+	2018	6832	2443	8770	22.802	21.787	-1.01505	0.0415174	-0.0683563	3.30785	0.849441	1
Solyc01g096810	SL3.0ch01	87680703	87682703	-	1401	10165	1490	11766	12.113	11.24	-0.872897	0.0175361	-0.113561	7.23539	0.698299	1
Solyc01g096890	SL3.0ch01	87761215	87763215	-	7314	10091	7293	10660	42.022	40.623	-1.39967	0.0044469	-0.0309629	3.06104	0.933354	1
Solyc01g096900	SL3.0ch01	87760101	87762101	+	3824	7079	3584	7492	35.073	32.358	-2.71466	1.76115e-05	-0.258381	4.53025	0.470676	1
Solyc01g096950	SL3.0ch01	87827122	87829122	+	4080	12565	3764	12213	24.512	23.559	-0.953	0.0225797	-0.555217	0.00977168	0.522636	1
Solyc01g096980	SL3.0ch01	87846986	87848986	-	1599	1507	1861	2792	51.481	39.996	-11.4853	7.73425e-23	-2.52849	-3.1045	0.437594	1
Solyc01g097010	SL3.0ch01	87861522	87863522	+	248	8489	162	7082	2.839	2.236	-0.602169	0.00986741	0.376801	6.2182	0.143254	1
Solyc01g097090	SL3.0ch01	87919169	87921169	-	5239	7554	3607	5711	40.952	38.71	-2.24206	0.000548022	-5.12548e-15	-3.91086	1	1
Solyc01g097140	SL3.0ch01	87971329	87973329	+	3447	9478	2983	8698	26.669	25.537	-1.13205	0.022753	0.478606	4.85961	0.122674	0.970753
Solyc01g097300	SL3.0ch01	88074241	88076241	+	1630	4206	1405	3896	27.93	26.504	-1.42566	0.0436485	0.339068	5.58649	0.239077	1
Solyc01g097310	SL3.0ch01	88079051	88081051	+	48	914	11	777	4.99	1.396	-3.59367	2.03426e-05	0.106135	5.93324	0.718504	1
Solyc01g097420	SL3.0ch01	88154645	88156645	-	1784	6562	1673	7336	21.376	18.57	-2.80519	3.75941e-06	-5.12548e-15	-2.98475	1	1
Solyc01g097450	SL3.0ch01	88178738	88180738	+	203	1524	179	1721	11.754	9.421	-2.33343	0.0122854	0.0962282	7.07468	0.733727	1
Solyc01g097700	SL3.0ch01	88315518	88317518	+	5919	6164	6319	6907	48.986	47.777	-1.20907	0.0276273	1.13185	-3.72817	0.786651	1
Solyc01g097735	SL3.0ch01	88329554	88331554	+	97	965	38	784	9.134	4.623	-4.51084	0.000108388	0.0841127	1.89049	0.84836	1
Solyc01g097790	SL3.0ch01	88378123	88380123	-	7973	11259	7278	11003	41.457	39.812	-1.64512	0.000794748	0.289415	4.74114	0.283523	1
Solyc01g097820	SL3.0ch01	88397156	88399156	+	215	3921	90	3279	5.198	2.671	-2.52684	2.9624e-08	0.406131	0.832167	0.479744	1
Solyc01g097900	SL3.0ch01	88461520	88463520	-	5412	8457	6083	9956	39.022	37.926	-1.09598	0.0260045	-5.12548e-15	-3.91086	1	1
Solyc01g097980	SL3.0ch01	88499346	88501346	+	4148	7427	3678	7003	35.836	34.435	-1.40088	0.0154394	0.374195	5.86081	0.180794	1
Solyc01g097990	SL3.0ch01	88512555	88514555	-	192	2260	62	1034	7.83	5.657	-2.17341	0.0108338	1.43855	1.36296	0.071375	0.788432
Solyc01g098000	SL3.0ch01	88511418	88513418	+	271	2466	62	935	9.901	6.219	-3.6827	0.000249728	-1.11054	-3.47118	0.620033	1
Solyc01g098140	SL3.0ch01	88597036	88599036	+	1230	4017	1258	4432	23.442	22.109	-1.333	0.0470034	2.06879	0.00626859	0.199284	1
Solyc01g098260	SL3.0ch01	88721099	88723099	-	7079	9385	7350	10256	42.997	41.747	-1.24971	0.0108277	1.82272	-3.87342	1	1
Solyc01g098270	SL3.0ch01	88725757	88727757	+	1609	6904	1287	6088	18.901	17.451	-1.44966	0.0102437	-5.12548e-15	-3.91086	1	1
Solyc01g098300	SL3.0ch01	88744687	88746687	+	1819	6747	1743	7523	21.235	18.811	-2.42441	4.39365e-05	-5.12548e-15	-3.91086	1	1
Solyc01g098440	SL3.0ch01	88839905	88841905	-	2144	8929	1845	8184	19.362	18.397	-0.965763	0.0363861	2.14509	-1.18526	0.170365	1
Solyc01g098490	SL3.0ch01	88863660	88865660	+	10433	12251	10291	12470	45.993	45.213	-0.779467	0.0450086	1.51933	3.53737	0.00403112	0.161461
Solyc01g098555	SL3.0ch01	88925555	88927555	-	150	1895	13	716	7.335	1.783	-5.5517	2.63905e-09	-5.12548e-15	-3.91086	1	1
Solyc01g098560	SL3.0ch01	88922659	88924659	+	1070	8064	921	9670	11.714	8.696	-3.01841	4.08146e-12	-0.785456	4.25184	0.0488191	0.671768
Solyc01g098780	SL3.0ch01	89089483	89091483	-	1240	7439	1042	6931	14.287	13.069	-1.21825	0.0121685	0.445238	6.33176	0.117035	0.952257
Solyc01g098800	SL3.0ch01	89098241	89100241	-	9454	8640	10652	10609	52.249	50.101	-2.14824	1.86442e-05	-0.356841	4.24996	0.604493	1
Solyc01g098810	SL3.0ch01	89098552	89100552	+	5490	9025	6237	11043	37.823	36.094	-1.72919	0.000981581	-0.59516	1.62886	0.285527	1
Solyc01g098890	SL3.0ch01	89143367	89145367	-	661	6235	425	5017	9.585	7.81	-1.77564	0.000378865	2.97419	-0.43884	0.0143241	0.350681
Solyc01g099010	SL3.0ch01	89233154	89235154	-	6592	9953	5782	10068	39.843	36.479	-3.36336	6.51548e-10	-5.12548e-15	-3.91086	1	1
Solyc01g099030	SL3.0ch01	89278818	89280818	-	134	1164	65	1086	10.324	5.647	-4.67631	1.83042e-05	0.563935	-1.47297	0.657707	1
Solyc01g099070	SL3.0ch01	89278603	89280603	-	124	1161	65	1172	9.65	5.255	-4.39516	2.35357e-05	-5.12548e-15	-3.91086	1	1
Solyc01g099090	SL3.0ch01	89288229	89290229	-	4644	13079	4402	14137	26.203	23.745	-2.4587	7.18459e-08	-0.101421	6.92324	0.733442	1
Solyc01g099180	SL3.0ch01	89362504	89364504	+	1922	5046	1450	5273	27.583	21.568	-6.01549	7.19966e-16	0.847309	4.24504	0.328683	1
Solyc01g099490	SL3.0ch01	89601508	89603508	+	183	2408	60	1075	7.063	5.286	-1.77657	0.0221572	-1.3608	-1.27213	0.25444	1
Solyc01g099487	SL3.0ch01	89606855	89608855	+	481	3732	307	2722	11.417	10.135	-1.28168	0.0406656	-2.25614	-0.923353	0.057787	0.724465
Solyc01g099520	SL3.0ch01	89618615	89620615	-	1012	9805	914	9981	9.356	8.389	-0.966475	0.00729011	0.273661	6.63466	0.511855	1
Solyc01g099540	SL3.0ch01	89630484	89632484	+	2365	2855	2005	3201	45.307	38.513	-6.79326	3.39718e-12	-5.12548e-15	-3.86778	1	1
Solyc01g099630	SL3.0ch01	89690337	89692337	-	6067	10874	6877	13095	35.813	34.433	-1.37932	0.00345537	-0.111743	6.85102	0.865837	1
Solyc01g099790	SL3.0ch01	89809377	89811377	+	4597	11193	4855	12889	29.113	27.361	-1.752	0.000272778	0.202611	6.92068	0.424335	1
Solyc01g099840	SL3.0ch01	89860093	89862093	+	2578	9438	2310	9230	21.455	20.017	-1.4374	0.0038896	-0.158899	8.30811	0.687959	1
Solyc01g099980	SL3.0ch01	89950506	89952506	-	2509	8957	2139	8424	21.882	20.25	-1.63216	0.00192197	-0.929587	4.85721	0.0066343	0.222347
Solyc01g100000	SL3.0ch01	89964112	89966112	-	368	8493	245	7984	4.153	2.977	-1.17575	3.01187e-05	-0.615855	5.86395	0.0384144	0.599741
Solyc01g100040	SL3.0ch01	89992150	89994150	-	1441	4676	1444	5653	23.557	20.347	-3.21067	7.98965e-06	-0.699128	4.18457	0.192838	1
Solyc01g100060	SL3.0ch01	90036337	90038337	+	250	4710	70	2118	5.04	3.199	-1.84105	0.000280492	0.116117	5.2648	0.708566	1
Solyc01g100070	SL3.0ch01	90043529	90045529	-	181	1389	66	939	11.529	6.567	-4.9615	2.16044e-05	1.72762	-1.24784	0.235134	1
Solyc01g100080	SL3.0ch01	90042186	90044186	+	210	2899	64	1789	6.755	3.454	-3.30072	4.62013e-07	0.0549905	3.91589	0.881553	1
Solyc01g100100	SL3.0ch01	90062564	90064564	-	4649	7362	4935	8525	38.706	36.664	-2.042	0.000538437	-3.35015	-2.49299	0.124481	0.977051
Solyc01g100240	SL3.0ch01	90193341	90195341	-	3958	11201	3868	11977	26.11	24.411	-1.69842	0.000403662	-0.438195	5.12891	0.280806	1
Solyc01g100260	SL3.0ch01	90203904	90205904	+	40	580	3	147	6.452	2	-4.45161	0.01554	0.0367984	4.65296	0.903704	1
Solyc01g100410	SL3.0ch01	90319772	90321772	+	1072	4355	1166	5238	19.753	18.207	-1.54572	0.0176182	0.306032	4.0128	0.358189	1
Solyc01g100430	SL3.0ch01	90335989	90337989	-	1111	6983	948	7329	13.726	11.453	-2.27279	1.09652e-05	-5.12548e-15	-3.91086	1	1
Solyc01g100455	SL3.0ch01	90352503	90354503	+	444	2001	269	2438	18.16	9.937	-8.22231	3.35424e-17	0.178559	0.2815	0.821086	1
Solyc01g100650	SL3.0ch01	90493588	90495588	+	1154	6553	722	6098	14.973	10.587	-4.38689	5.7519e-15	-0.616236	5.99085	0.0330214	0.555576
Solyc01g100720	SL3.0ch01	90563827	90565827	-	3963	8640	4021	9466	31.445	29.814	-1.631	0.00265175	0.0347191	7.54236	0.894018	1
Solyc01g100730	SL3.0ch01	90563162	90565162	+	3937	7988	4002	8516	33.015	31.97	-1.04471	0.0395564	0.156208	3.96838	0.646112	1
Solyc01g100770	SL3.0ch01	90592583	90594583	+	4337	6444	3973	6322	40.228	38.592	-1.63663	0.00845881	-0.0182876	4.62993	0.979907	1
Solyc01g100990	SL3.0ch01	90739000	90741000	-	130	1000	111	1172	11.504	8.652	-2.85283	0.0111754	0.3422	4.01506	0.305592	1
Solyc01g101050	SL3.0ch01	90784800	90786800	+	5170	9487	4926	10382	35.273	32.179	-3.094	1.75998e-08	-5.12548e-15	-2.41046	1	1
Solyc01g101060	SL3.0ch01	90793404	90795404	+	5411	9479	5450	10265	36.34	34.68	-1.65958	0.00157464	0.262714	10.421	0.461593	1
Solyc01g101140	SL3.0ch01	90863084	90865084	+	1487	8739	1500	9717	14.541	13.373	-1.16881	0.00757769	-0.216532	7.0594	0.491558	1
Solyc01g101240	SL3.0ch01	90932540	90934540	+	9734	11134	9962	12897	46.646	43.58	-3.06537	1.81191e-10	0.146327	7.73702	0.692408	1
Solyc01g102260	SL3.0ch01	90968683	90970683	-	592	5040	527	5449	10.511	8.819	-1.69276	0.00130729	-0.123057	0.751029	0.8941	1
Solyc01g102270	SL3.0ch01	90968846	90970846	+	584	4720	502	4895	11.011	9.301	-1.70909	0.00219495	-0.368414	3.3205	0.413109	1
Solyc01g102265	SL3.0ch01	90969001	90971001	+	586	4362	489	4361	11.843	10.082	-1.76069	0.00324165	1.38472	-2.79043	0.495083	1
Solyc01g102380	SL3.0ch01	91087753	91089753	+	2885	6546	2502	6628	30.591	27.404	-3.18644	1.72003e-06	-5.12548e-15	-3.91086	1	1
Solyc01g102420	SL3.0ch01	91117196	91119196	+	2662	8246	2076	7376	24.404	21.964	-2.4405	3.22069e-05	-4.2436	-3.42927	0.281968	1
Solyc01g102435	SL3.0ch01	91132825	91134825	-	467	3846	345	3291	10.828	9.488	-1.33928	0.0265247	0.824649	-1.06331	0.385815	1
Solyc01g102440	SL3.0ch01	91132825	91134825	-	467	3846	345	3291	10.828	9.488	-1.33928	0.0265247	0.104452	-1.63793	0.940222	1
Solyc01g102590	SL3.0ch01	91241941	91243941	-	314	1195	128	674	20.808	15.96	-4.84838	0.00278715	-0.0652914	0.661475	0.923665	1
Solyc01g102680	SL3.0ch01	91293919	91295919	+	309	4638	155	3008	6.246	4.9	-1.3458	0.00613411	0.944605	-2.73202	0.638725	1
Solyc01g102685	SL3.0ch01	91297665	91299665	+	332	2595	141	1522	11.343	8.479	-2.86402	0.00131231	5.1811	-2.77168	0.0630385	0.753556
Solyc01g102705	SL3.0ch01	91316650	91318650	+	499	4031	384	3869	11.015	9.029	-1.98653	0.00128382	-1.03285	-3.48477	0.712379	1
Solyc01g102890	SL3.0ch01	91444225	91446225	-	1209	10832	828	9628	10.041	7.919	-2.1218	3.28289e-08	-5.12548e-15	-3.91086	1	1
Solyc01g103180	SL3.0ch01	91722191	91724191	+	2589	10030	2642	10899	20.517	19.511	-1.00557	0.0217377	0.439766	3.55341	0.201553	1
Solyc01g103190	SL3.0ch01	91728058	91730058	+	51	1685	18	1600	2.938	1.112	-1.8253	0.000155799	0.747178	0.528281	0.160415	1
Solyc01g103185	SL3.0ch01	91729510	91731510	+	114	3816	92	4201	2.901	2.143	-0.75774	0.0150639	0.204905	3.91505	0.510279	1
Solyc01g103200	SL3.0ch01	91735184	91737184	+	3043	7104	3257	8170	29.989	28.503	-1.48649	0.00935696	0.195578	6.00581	0.525663	1
Solyc01g103220	SL3.0ch01	91739143	91741143	+	2473	10253	2221	10409	19.433	17.585	-1.84754	0.000115826	0.48882	7.86774	0.163655	1
Solyc01g103420	SL3.0ch01	91902558	91904558	+	4957	12157	4752	14053	28.965	25.27	-3.69472	7.46305e-15	0.150151	6.38133	0.593163	1
Solyc01g103450	SL3.0ch01	91937779	91939779	+	29	696	4	396	4	1	-3	0.00186659	-0.532121	8.99957	0.0932345	0.876443
Solyc01g103457	SL3.0ch01	91945789	91947789	-	998	6997	754	7376	12.483	9.274	-3.20851	8.92305e-11	1.86072	-1.36738	0.168476	1
Solyc01g103460	SL3.0ch01	91944980	91946980	+	919	6182	685	6323	12.942	9.775	-3.1673	3.94908e-09	0.327746	3.4553	0.398076	1
Solyc01g103500	SL3.0ch01	91973854	91975854	-	2811	7634	2387	8188	26.912	22.572	-4.34029	5.25588e-13	0.745108	1.04185	0.45872	1
Solyc01g103590	SL3.0ch01	92045495	92047495	+	1476	8814	1262	8193	14.344	13.347	-0.996588	0.0220393	-0.576812	3.70808	0.315835	1
Solyc01g103690	SL3.0ch01	92125597	92127597	-	310	3500	108	1582	8.136	6.391	-1.74595	0.0126913	0.0549605	4.30435	0.865892	1
Solyc01g103695	SL3.0ch01	92140266	92142266	-	9087	10885	9334	11782	45.499	44.203	-1.29525	0.00493955	-0.205993	2.65477	0.809932	1
Solyc01g103700	SL3.0ch01	92140266	92142266	-	9087	10885	9334	11782	45.499	44.203	-1.29525	0.00493955	-0.344039	3.43906	0.443455	1
Solyc01g103864	SL3.0ch01	92270640	92272640	-	4134	3060	3951	3171	57.465	55.476	-1.98856	0.00915544	-5.12548e-15	-3.91086	1	1
Solyc01g103900	SL3.0ch01	92294073	92296073	-	73	933	0	100	7.256	0	-7.25646	0.000790797	-5.12548e-15	-3.87428	1	1
Solyc01g103920	SL3.0ch01	92301352	92303352	-	111	649	86	1101	14.605	7.245	-7.36011	2.96079e-07	-0.0473351	4.88941	0.924488	1
Solyc01g103990	SL3.0ch01	92360519	92362519	-	6195	11158	6660	12616	35.7	34.551	-1.14914	0.0117833	0.468442	8.16014	0.167465	1
Solyc01g104010	SL3.0ch01	92378938	92380938	-	817	6268	476	4994	11.531	8.702	-2.82939	2.21816e-07	-1.34195	-1.77684	0.291303	1
Solyc01g104015	SL3.0ch01	92382830	92384830	+	1573	5245	1477	5270	23.071	21.891	-1.18007	0.0468775	0.742123	4.8019	0.0487458	0.671367
Solyc01g104090	SL3.0ch01	92455179	92457179	-	111	1102	20	548	9.151	3.521	-5.62974	8.32383e-06	-0.476791	0.065107	0.531076	1
Solyc01g104190	SL3.0ch01	92536721	92538721	+	6930	8164	6521	8035	45.912	44.799	-1.11289	0.0276512	-5.12548e-15	-3.91086	1	1
Solyc01g104260	SL3.0ch01	92594980	92596980	-	207	1541	51	680	11.842	6.977	-4.86536	0.000165081	-0.586768	0.0822239	0.411742	1
Solyc01g104270	SL3.0ch01	92591552	92593552	+	5398	5547	5327	6052	49.319	46.814	-2.50502	0.000137483	-0.0451764	6.38824	0.890058	1
Solyc01g104431	SL3.0ch01	92708823	92710823	-	4667	5599	5167	6612	45.461	43.866	-1.59454	0.00988293	-0.216622	-1.77949	0.937663	1
Solyc01g104434	SL3.0ch01	92746083	92748083	-	3093	10686	2850	11564	22.447	19.772	-2.67476	4.41673e-08	-0.568965	3.60407	0.305987	1
Solyc01g104435	SL3.0ch01	92755940	92757940	-	1779	8306	1591	8220	17.64	16.216	-1.42357	0.00447795	-0.650256	0.868903	0.189334	1
Solyc01g104438	SL3.0ch01	92773961	92775961	+	2471	7102	1987	6455	25.812	23.537	-2.2751	0.000294081	-1.88308	-1.24248	0.0552498	0.712135
Solyc01g104439	SL3.0ch01	92779942	92781942	-	2325	4912	2290	5183	32.127	30.644	-1.48292	0.0263277	-5.12548e-15	-3.76036	1	1
Solyc01g104480	SL3.0ch01	92828201	92830201	+	152	1857	147	2249	7.566	6.135	-1.43073	0.0306785	0.145889	5.73694	0.588528	1
Solyc01g104500	SL3.0ch01	92861871	92863871	-	54	2532	17	1789	2.088	0.941	-1.14686	0.00201053	0.129544	6.60425	0.670391	1
Solyc01g104530	SL3.0ch01	92884980	92886980	-	4832	8692	4862	9274	35.729	34.394	-1.33462	0.0110018	0.182112	5.98219	0.527272	1
Solyc01g104540	SL3.0ch01	92891584	92893584	+	3174	13969	2772	13877	18.515	16.65	-1.8652	5.97909e-06	0.294966	5.52726	0.297269	1
Solyc01g104600	SL3.0ch01	92940772	92942772	+	5725	9999	4955	11295	36.409	30.492	-5.917	1.76494e-28	0.48457	4.64918	0.114	0.944099
Solyc01g104650	SL3.0ch01	92972817	92974817	+	6874	4171	8013	5399	62.236	59.745	-2.4913	5.78043e-05	1.46204	6.31769	0.0082393	0.254274
Solyc01g104680	SL3.0ch01	92993924	92995924	-	118	1755	88	2046	6.3	4.124	-2.17634	0.00128833	-0.0189009	5.94142	0.958075	1
Solyc01g104770	SL3.0ch01	93030728	93032728	-	176	1321	57	577	11.757	8.991	-2.76631	0.0332503	0.28087	-1.59457	0.795443	1
Solyc01g104775	SL3.0ch01	93034082	93036082	-	2788	10396	2388	11359	21.147	17.371	-3.77578	8.47359e-15	0.204354	7.91048	0.434014	1
Solyc01g104830	SL3.0ch01	93061039	93063039	+	116	2351	0	148	4.702	0	-4.70207	0.00104972	-5.12548e-15	-3.91086	1	1
Solyc01g104850	SL3.0ch01	93071228	93073228	+	3181	8968	3217	10061	26.183	24.228	-1.95518	0.000238909	-1.7011	5.53758	0.00687601	0.226465
Solyc01g104940	SL3.0ch01	93154592	93156592	+	219	2721	15	802	7.449	1.836	-5.61299	1.08735e-10	-5.12548e-15	-3.87428	1	1
Solyc01g104980	SL3.0ch01	93195152	93197152	-	1477	7635	759	6701	16.209	10.174	-6.03513	1.73415e-29	-0.279489	0.901788	0.624778	1
Solyc01g105160	SL3.0ch01	93339116	93341116	-	66	399	103	923	14.194	10.039	-4.15456	0.0117055	-0.517815	4.3078	0.0774894	0.81663
Solyc01g105190	SL3.0ch01	93348913	93350913	+	1321	5980	996	5770	18.093	14.721	-3.37275	7.52849e-08	1.6265	-2.12192	0.461231	1
Solyc01g105250	SL3.0ch01	93380157	93382157	-	3444	3601	2966	3482	48.886	45.999	-2.88698	0.000552448	-5.12548e-15	-3.91086	1	1
Solyc01g105260	SL3.0ch01	93388013	93390013	-	446	3952	195	2706	10.141	6.722	-3.41915	3.75246e-07	-5.12548e-15	-3.91086	1	1
Solyc01g105290	SL3.0ch01	93405976	93407976	+	102	2308	36	2106	4.232	1.681	-2.55169	3.71031e-07	-0.10828	5.78247	0.78381	1
Solyc01g105355	SL3.0ch01	93443479	93445479	+	2544	7833	2085	7254	24.516	22.326	-2.19003	0.000214301	-5.12548e-15	-3.91086	1	1
Solyc01g105430	SL3.0ch01	93497937	93499937	+	2839	10033	2419	9700	22.056	19.96	-2.09523	4.01871e-05	-0.752566	-0.637603	0.366899	1
Solyc01g105450	SL3.0ch01	93514791	93516791	-	1874	11929	1634	11502	13.577	12.439	-1.13766	0.00333148	-5.26883	-1.94652	0.0362756	0.585517
Solyc01g105540	SL3.0ch01	93577524	93579524	-	1927	6165	1178	4228	23.814	21.791	-2.02304	0.00369786	-0.0680528	4.90396	0.836611	1
Solyc01g105750	SL3.0ch01	93701532	93703532	-	189	1368	50	578	12.139	7.962	-4.17694	0.00298334	-5.12548e-15	-3.91086	1	1
Solyc01g105760	SL3.0ch01	93701842	93703842	-	228	1470	50	578	13.428	7.962	-5.46578	0.000169315	-5.12548e-15	-3.91086	1	1
Solyc01g105770	SL3.0ch01	93714930	93716930	-	174	2176	3	331	7.404	0.898	-6.50605	2.0042e-07	-5.12548e-15	-3.56274	1	1
Solyc01g105827	SL3.0ch01	93754093	93756093	+	439	3957	328	4044	9.986	7.502	-2.48406	3.48765e-05	0.496171	-3.28367	1	1
Solyc01g105850	SL3.0ch01	93770705	93772705	+	6057	8348	6553	9445	42.048	40.961	-1.08653	0.0277506	-5.12548e-15	-3.91086	1	1
Solyc01g106010	SL3.0ch01	93891901	93893901	-	7045	10787	7105	11675	39.508	37.833	-1.67483	0.000681569	-0.0547565	4.74184	0.86244	1
Solyc01g106020	SL3.0ch01	93893036	93895036	+	4200	11221	4391	13132	27.236	25.058	-2.17709	6.65996e-06	0.146596	3.81135	0.684016	1
Solyc01g106030	SL3.0ch01	93899606	93901606	+	110	798	34	357	12.115	8.696	-3.41889	0.0395115	0.268114	5.10897	0.302137	1
Solyc01g106205	SL3.0ch01	94037633	94039633	+	111	861	75	1103	11.42	6.367	-5.05303	3.24043e-05	0.081961	-0.811241	0.954751	1
Solyc01g106360	SL3.0ch01	94182743	94184743	+	9743	11354	9829	12992	46.182	43.07	-3.11194	8.16205e-11	0.519173	6.67601	0.0636418	0.757266
Solyc01g106390	SL3.0ch01	94201939	94203939	-	5283	5643	5219	7238	48.353	41.896	-6.45643	1.45231e-22	-0.304202	6.58918	0.609554	1
Solyc01g106400	SL3.0ch01	94201549	94203549	+	5292	6150	5201	6414	46.251	44.778	-1.47235	0.0134789	-1.27327	-0.268878	0.139284	1
Solyc01g106710	SL3.0ch01	94364545	94366545	-	919	7976	597	7218	10.332	7.639	-2.69249	1.79378e-09	-5.12548e-15	-3.78851	1	1
Solyc01g106750	SL3.0ch01	94383025	94385025	+	881	6641	552	5187	11.712	9.618	-2.09391	9.2932e-05	-2.92752	-1.97535	0.0752542	0.805939
Solyc01g106800	SL3.0ch01	94454405	94456405	-	938	7947	757	7192	10.557	9.523	-1.03391	0.0144195	0.20489	2.95108	0.63454	1
Solyc01g106850	SL3.0ch01	94482398	94484398	-	142	1099	60	1313	11.442	4.37	-7.07239	1.82723e-11	-5.12548e-15	-3.91086	1	1
Solyc01g106870	SL3.0ch01	94482350	94484350	+	142	847	60	1056	14.358	5.376	-8.98159	3.97713e-12	-0.144389	5.04319	0.601463	1
Solyc01g106950	SL3.0ch01	94530828	94532828	+	268	2236	400	4011	10.703	9.068	-1.63464	0.0145905	-0.455203	-2.15337	1	1
Solyc01g106980	SL3.0ch01	94577515	94579515	-	2018	10103	974	9400	16.649	9.389	-7.25993	1.71693e-57	-3.95206	-3.66542	0.358036	1
Solyc01g107080	SL3.0ch01	94622992	94624992	-	1424	6728	1461	7460	17.468	16.377	-1.09102	0.0295739	2.26914	1.48434	0.044009	0.645232
Solyc01g107180	SL3.0ch01	94697873	94699873	+	6165	9437	6170	10085	39.514	37.958	-1.55661	0.00271577	-0.129159	3.15559	0.741352	1
Solyc01g107215	SL3.0ch01	94745394	94747394	+	76	1894	35	1858	3.858	1.849	-2.00895	0.000162525	0.767368	1.17122	0.109235	0.928494
Solyc01g107220	SL3.0ch01	94751992	94753992	-	296	2709	226	2460	9.85	8.414	-1.43625	0.0321252	-5.12548e-15	-3.91086	1	1
Solyc01g107380	SL3.0ch01	94838385	94840385	-	7017	10906	6263	11785	39.151	34.702	-4.44891	5.78359e-18	-0.24701	6.39369	0.506689	1
Solyc01g107395	SL3.0ch01	94858169	94860169	+	208	3662	149	3765	5.375	3.807	-1.56783	0.00063292	-5.12548e-15	-3.87171	1	1
Solyc01g107420	SL3.0ch01	94883441	94885441	+	4881	11039	4375	10343	30.66	29.726	-0.934042	0.0371025	0.324664	-0.991147	0.767445	1
Solyc01g107430	SL3.0ch01	94891112	94893112	-	74	1489	29	1183	4.734	2.393	-2.34175	0.000754226	-5.12548e-15	-3.91086	1	1
Solyc01g107440	SL3.0ch01	94891924	94893924	-	2104	5206	2108	6143	28.782	25.548	-3.23407	5.50055e-06	-5.12548e-15	-3.91086	1	1
Solyc01g107560	SL3.0ch01	94962399	94964399	-	4896	9246	5015	10551	34.62	32.218	-2.40263	1.04816e-05	0.371777	2.18003	0.551215	1
Solyc01g107610	SL3.0ch01	94998539	95000539	+	1365	6935	1189	7508	16.446	13.671	-2.7744	4.49702e-07	0.639254	4.34859	0.0438464	0.64433
Solyc01g107625	SL3.0ch01	95007701	95009701	+	507	3913	399	3792	11.471	9.52	-1.95019	0.00217094	0.0727291	2.14919	0.869872	1
Solyc01g107630	SL3.0ch01	95010486	95012486	+	893	3628	579	3362	19.752	14.692	-5.06056	1.13704e-09	-1.99002	-2.95567	0.347763	1
Solyc01g107675	SL3.0ch01	95036779	95038779	+	2727	7694	2698	9125	26.168	22.82	-3.34839	8.45856e-09	-1.40034	-1.5134	0.147553	1
Solyc01g107730	SL3.0ch01	95075164	95077164	-	2611	9885	2365	9903	20.895	19.278	-1.61689	0.000987102	-0.551461	4.91143	0.320258	1
Solyc01g107760	SL3.0ch01	95095429	95097429	-	70	1742	42	2071	3.863	1.988	-1.87544	0.000346864	-0.257424	-2.62999	0.92542	1
Solyc01g107830	SL3.0ch01	95141744	95143744	-	3606	6597	2683	5251	35.343	33.816	-1.52606	0.016901	2.35842	7.7244	3.87788e-07	0.000116558
Solyc01g107857	SL3.0ch01	95141768	95143768	+	3627	6525	2683	5251	35.727	33.816	-1.91046	0.00439643	2.69161	4.23231	1.42817e-06	0.000357955
Solyc01g107960	SL3.0ch01	95234125	95236125	+	5000	9873	5397	11162	33.618	32.593	-1.02542	0.0272244	-5.12548e-15	-3.91086	1	1
Solyc01g108010	SL3.0ch01	95289077	95291077	-	425	4065	331	4291	9.465	7.161	-2.30408	5.94237e-05	-0.105075	5.36272	0.713956	1
Solyc01g108043	SL3.0ch01	95313394	95315394	+	301	3098	129	2012	8.856	6.025	-2.83032	8.22705e-05	-1.29649	-1.63074	0.169419	1
Solyc01g108047	SL3.0ch01	95314040	95316040	+	118	1672	26	1020	6.592	2.486	-4.10652	5.3346e-07	0.269105	3.20861	0.597224	1
Solyc01g108060	SL3.0ch01	95328112	95330112	-	1235	2960	615	1889	29.44	24.561	-4.87911	1.30396e-05	-0.828217	0.516332	0.187111	1
Solyc01g108070	SL3.0ch01	95327060	95329060	+	1238	3071	611	1809	28.731	25.248	-3.48263	0.00135271	-0.200877	2.71472	0.627851	1
Solyc01g108120	SL3.0ch01	95370068	95372068	+	6193	14513	5345	13923	29.909	27.74	-2.16891	1.63804e-06	0.157806	4.22134	0.632742	1
Solyc01g108170	SL3.0ch01	95439252	95441252	-	2936	4940	2543	4698	37.278	35.119	-2.15835	0.00359912	-2.53366	-2.07715	0.33359	1
Solyc01g108310	SL3.0ch01	95560494	95562494	+	4617	10176	4850	11285	31.211	30.059	-1.15183	0.0151411	-5.12548e-15	-3.86959	1	1
Solyc01g108430	SL3.0ch01	95653752	95655752	+	140	1663	71	1300	7.765	5.179	-2.58613	0.00241017	0.335341	4.31854	0.305283	1
Solyc01g108450	SL3.0ch01	95676907	95678907	-	398	1543	195	943	20.505	17.135	-3.36957	0.0123257	-4.84679	-1.67027	0.00653432	0.219907
Solyc01g108510	SL3.0ch01	95714052	95716052	-	9413	27651	8782	26662	25.397	24.777	-0.619498	0.0273242	-0.239251	6.06112	0.486575	1
Solyc01g108740	SL3.0ch01	95851473	95853473	-	135	1527	3	294	8.123	1.01	-7.11264	4.1257e-07	-2.67041	-3.65439	0.5769	1
Solyc01g108765	SL3.0ch01	95858681	95860681	-	300	2813	34	875	9.637	3.74	-5.89663	1.6147e-09	-5.12548e-15	-3.91086	1	1
Solyc01g108790	SL3.0ch01	95889454	95891454	+	1784	7817	1639	7737	18.581	17.481	-1.1006	0.0248699	0.292562	-2.13967	0.796339	1
Solyc01g108810	SL3.0ch01	95906602	95908602	-	35	503	4	352	6.506	1.124	-5.38198	5.51543e-05	-5.12548e-15	-3.86778	1	1
Solyc01g108870	SL3.0ch01	95934861	95936861	-	7492	10268	7976	11701	42.185	40.535	-1.65005	0.000798858	-5.12548e-15	0.209418	1	1
Solyc01g108900	SL3.0ch01	95950288	95952288	-	137	1050	110	1495	11.542	6.854	-4.68812	1.68046e-05	-1.81982	-1.3436	0.206011	1
Solyc01g108930	SL3.0ch01	95975370	95977370	+	143	2079	64	1512	6.436	4.061	-2.37473	0.000910509	-5.12548e-15	-3.91086	1	1
Solyc01g108970	SL3.0ch01	95991896	95993896	-	215	1487	75	810	12.632	8.475	-4.15762	0.000845401	-1.07547	1.01591	0.129234	0.991942
Solyc01g109050	SL3.0ch01	96026505	96028505	-	69	1883	14	1132	3.535	1.222	-2.3132	5.55412e-05	1.2672	0.727498	0.0308625	0.540615
Solyc01g109140	SL3.0ch01	96104945	96106945	+	2269	8555	2318	9644	20.963	19.378	-1.58465	0.00181528	5.16329	3.05954	0.072263	0.791882
Solyc01g109240	SL3.0ch01	96156068	96158068	+	2627	9576	2816	10867	21.527	20.58	-0.947211	0.0306581	-5.12548e-15	-3.91086	1	1
Solyc01g109310	SL3.0ch01	96209554	96211554	-	1007	8295	849	8401	10.826	9.178	-1.64725	0.000146848	0.0519172	2.86887	0.907311	1
Solyc01g109360	SL3.0ch01	96249200	96251200	+	11805	9064	11890	9613	56.567	55.295	-1.27255	0.00490411	-0.039326	7.7104	0.88152	1
Solyc01g109440	SL3.0ch01	96303301	96305301	+	1635	12026	1315	10438	11.968	11.189	-0.779744	0.0270143	2.60069	-3.65395	0.606468	1
Solyc01g109460	SL3.0ch01	96319031	96321031	+	2896	11188	2569	11383	20.562	18.413	-2.14921	5.05551e-06	2.93547	5.06721	0.00710439	0.231466
Solyc01g109470	SL3.0ch01	96327478	96329478	-	1719	8459	1516	8153	16.889	15.679	-1.2104	0.0113442	1.55624	-1.44593	0.239468	1
Solyc01g109495	SL3.0ch01	96340480	96342480	-	38	1554	17	1223	2.387	1.371	-1.01597	0.02744	-0.586583	-2.9216	0.786937	1
Solyc01g109540	SL3.0ch01	96365630	96367630	+	251	3554	160	2761	6.597	5.478	-1.11901	0.0285115	-0.0735794	7.6487	0.798933	1
Solyc01g109530	SL3.0ch01	96366154	96368154	+	244	5167	140	3955	4.509	3.419	-1.09053	0.00427106	-5.12548e-15	-3.91086	1	1
Solyc01g109780	SL3.0ch01	96544358	96546358	+	9876	13113	9359	13213	42.96	41.463	-1.4968	0.000830532	0.230837	4.12285	0.632201	1
Solyc01g109795	SL3.0ch01	96550488	96552488	-	147	1752	33	870	7.741	3.654	-4.08643	1.88648e-05	-5.12548e-15	-3.91086	1	1
Solyc01g109810	SL3.0ch01	96581392	96583392	+	872	7888	561	8704	9.954	6.055	-3.89929	1.13715e-21	-0.663171	3.51209	0.298738	1
Solyc01g109880	SL3.0ch01	96636667	96638667	+	348	11539	275	12242	2.928	2.197	-0.730556	0.00021578	0.534735	8.68916	0.123994	0.976251
Solyc01g109980	SL3.0ch01	96716610	96718610	-	6318	7323	6043	8365	46.316	41.942	-4.37428	3.15031e-13	-0.258271	5.21466	0.362296	1
Solyc01g110000	SL3.0ch01	96738691	96740691	+	2148	8502	2003	8570	20.169	18.944	-1.22453	0.0135586	-0.658017	6.11979	0.174382	1
Solyc01g110080	SL3.0ch01	96790886	96792886	-	8419	10126	8819	11190	45.398	44.075	-1.32252	0.00530071	-5.12548e-15	-3.91086	1	1
Solyc01g110370	SL3.0ch01	97006412	97008412	-	5113	7703	4876	8654	39.895	36.038	-3.85701	1.66399e-10	0.076315	4.32743	0.850838	1
Solyc01g110385	SL3.0ch01	97019497	97021497	+	635	3242	356	2487	16.379	12.522	-3.85666	8.37272e-06	0.117077	7.60462	0.661429	1
Solyc01g110400	SL3.0ch01	97028542	97030542	-	81	2729	33	2588	2.883	1.259	-1.6235	2.14734e-05	0.554731	3.80517	0.147191	1
Solyc01g110460	SL3.0ch01	97073477	97075477	-	954	10017	669	8766	8.696	7.091	-1.60503	1.92636e-05	-0.425661	4.49629	0.148252	1
Solyc01g110480	SL3.0ch01	97091043	97093043	+	2823	10051	2530	10684	21.928	19.146	-2.78156	3.2047e-08	-0.0155111	6.753	0.966577	1
Solyc01g110490	SL3.0ch01	97096535	97098535	+	7074	9735	6816	9740	42.085	41.169	-0.915233	0.0432245	-0.324221	5.17578	0.215281	1
Solyc01g110510	SL3.0ch01	97103834	97105834	+	118	1139	27	566	9.387	4.553	-4.83431	0.000146402	2.54703	-0.0298139	0.000512546	0.0377217
Solyc01g110620	SL3.0ch01	97178215	97180215	+	6505	11386	6463	12306	36.359	34.434	-1.92462	9.11975e-05	-5.12548e-15	-3.91086	1	1
Solyc01g110780	SL3.0ch01	97259261	97261261	-	94	3150	29	1622	2.898	1.757	-1.14115	0.00862024	-1.2288	-3.21754	0.474262	1
Solyc01g110830	SL3.0ch01	97276911	97278911	-	1958	6231	2055	7036	23.91	22.605	-1.30535	0.0220022	-5.12548e-15	-3.71689	1	1
Solyc01g110980	SL3.0ch01	97325415	97327415	+	28	611	13	766	4.382	1.669	-2.71304	0.00222684	-2.12565	-3.21735	0.146382	1
Solyc01g110990	SL3.0ch01	97326483	97328483	+	1255	2580	1006	2786	32.725	26.53	-6.19537	3.99565e-09	0.200723	5.026	0.520007	1
Solyc01g111020	SL3.0ch01	97354556	97356556	-	11281	18762	11690	20121	37.55	36.748	-0.801218	0.0203484	-1.08652	5.81617	0.000349603	0.0283039
Solyc01g111090	SL3.0ch01	97390365	97392365	-	46	944	10	745	4.646	1.325	-3.32196	4.4021e-05	0.0628155	5.39009	0.825101	1
Solyc01g111160	SL3.0ch01	97434688	97436688	-	421	2468	302	2266	14.573	11.76	-2.81239	0.00149007	-5.12548e-15	-3.91086	1	1
Solyc01g111170	SL3.0ch01	97434697	97436697	+	421	2468	302	2266	14.573	11.76	-2.81239	0.00149007	0.495123	9.62732	0.170908	1
Solyc01g111210	SL3.0ch01	97453622	97455622	+	622	6518	283	5367	8.711	5.009	-3.70264	5.17148e-16	0.263004	2.31792	0.672724	1
Solyc01g111220	SL3.0ch01	97459820	97461820	+	144	2053	103	2095	6.554	4.686	-1.86831	0.00423878	0.210734	1.95536	0.825751	1
Solyc01g111230	SL3.0ch01	97464217	97466217	+	5875	9056	5334	8952	39.348	37.337	-2.01041	0.000297382	0.958736	5.87202	0.125945	0.982292
Solyc01g111260	SL3.0ch01	97479449	97481449	+	6468	10594	6017	11776	37.909	33.817	-4.09213	3.6185e-15	-0.14599	7.05597	0.616076	1
Solyc01g111360	SL3.0ch01	97548054	97550054	+	1159	12057	641	11047	8.77	5.484	-3.28542	2.77477e-23	0.0238233	5.04912	0.94319	1
Solyc01g111430	SL3.0ch01	97594119	97596119	-	548	2750	184	1933	16.616	8.692	-7.92459	3.75748e-17	-0.472893	0.74134	0.490987	1
Solyc01g111460	SL3.0ch01	97606609	97608609	-	113	1235	73	1521	8.383	4.58	-3.80312	2.18248e-05	0.420655	0.971435	0.415885	1
Solyc01g111570	SL3.0ch01	97710136	97712136	+	1761	10118	1060	10180	14.824	9.431	-5.39388	1.82312e-35	0.31014	4.50062	0.50448	1
Solyc01g111590	SL3.0ch01	97729226	97731226	-	279	2698	265	3362	9.372	7.306	-2.06554	0.00161467	-0.257269	-0.905179	0.833029	1
Solyc01g111690	SL3.0ch01	97793493	97795493	+	706	10619	475	10080	6.234	4.5	-1.73376	1.68059e-08	-0.0153188	3.44155	0.965475	1
Solyc01g111765	SL3.0ch01	97864075	97866075	-	2124	5434	1995	6260	28.103	24.167	-3.9355	2.15849e-08	0.144073	4.87053	0.601389	1
Solyc01g111780	SL3.0ch01	97864258	97866258	+	2142	5900	2016	6966	26.635	22.445	-4.19028	3.05844e-10	-0.440926	6.31726	0.243367	1
Solyc01g111820	SL3.0ch01	97893374	97895374	+	724	9197	612	9628	7.298	5.977	-1.32109	0.000123251	-5.12548e-15	-3.7556	1	1
Solyc01g111880	SL3.0ch01	97963709	97965709	-	1213	6189	848	5839	16.387	12.681	-3.70614	6.90686e-10	-0.359064	3.46359	0.554056	1
Solyc01g111920	SL3.0ch01	97995256	97997256	+	6266	3727	5726	3606	62.704	61.359	-1.34513	0.027649	0.460834	5.54365	0.111148	0.936667
Solyc01g111970	SL3.0ch01	98025336	98027336	-	503	9163	362	8302	5.204	4.178	-1.0256	0.000773163	2.28757	5.67059	0.000448854	0.0343782
Solyc01g112010	SL3.0ch01	98053866	98055866	-	5962	10714	5797	11395	35.752	33.719	-2.03281	6.65056e-05	-0.0337754	2.27946	0.944539	1
Solyc01g112020	SL3.0ch01	98064835	98066835	-	8634	7498	9678	9159	53.521	51.378	-2.14334	5.07262e-05	0.138738	6.10726	0.601837	1
Solyc01g112160	SL3.0ch01	98142295	98144295	+	3	27	8	259	10	2.996	-7.00375	0.0418123	0.318459	3.08277	0.463605	1
Solyc01g112165	SL3.0ch01	98147901	98149901	-	84	1742	34	1141	4.6	2.894	-1.7066	0.0111389	-0.759661	-3.76364	1	1
Solyc01g112240	SL3.0ch01	98192204	98194204	-	234	2080	168	1808	10.112	8.502	-1.61034	0.0357899	0.26132	3.75565	0.402525	1
Solyc01g112303	SL3.0ch01	98304150	98306150	+	535	4605	337	3781	10.409	8.184	-2.22498	0.000188633	-5.73223	-3.2157	0.0267993	0.50415
Solyc01g112305	SL3.0ch01	98304769	98306769	+	537	5336	387	4438	9.144	8.021	-1.12281	0.0210684	-1.05383	-3.47512	0.826271	1
Solyc02g044040	SL3.0ch02	148436	150436	+	3597	5429	2615	4284	39.852	37.904	-1.9475	0.00712593	1.34445	-0.300172	0.0691746	0.780544
Solyc02g044030	SL3.0ch02	151381	153381	+	2837	6101	2345	5467	31.741	30.018	-1.72296	0.00911082	0.944143	-1.79087	0.376271	1
Solyc02g044045	SL3.0ch02	152496	154496	+	2060	4480	1564	3771	31.498	29.316	-2.18263	0.00589526	-5.12548e-15	-3.91086	1	1
Solyc02g043990	SL3.0ch02	235829	237829	+	516	9931	226	8837	4.939	2.494	-2.44556	4.25533e-19	-5.12548e-15	-3.91086	1	1
Solyc02g043960	SL3.0ch02	374515	376515	-	3127	5921	2771	5687	34.56	32.762	-1.79824	0.00676062	-5.12548e-15	-3.91086	1	1
Solyc02g043963	SL3.0ch02	374879	376879	-	3147	6675	2951	7189	32.04	29.103	-2.93775	5.92643e-06	-5.12548e-15	-3.91086	1	1
Solyc02g049106	SL3.0ch02	3958689	3960689	-	1755	2261	1230	1731	43.7	41.54	-2.16018	0.035753	-5.12548e-15	-3.91086	1	1
Solyc02g050190	SL3.0ch02	4340612	4342612	+	1981	4348	1884	4482	31.3	29.595	-1.70564	0.0191591	-5.12548e-15	-3.91086	1	1
Solyc02g005060	SL3.0ch02	6319657	6321657	+	5034	6321	3780	5806	44.333	39.433	-4.90039	1.43858e-12	-5.12548e-15	-3.91086	1	1
Solyc02g005070	SL3.0ch02	6326005	6328005	+	2591	5275	2019	4462	32.939	31.153	-1.78663	0.0126024	-3.8915	-3.28604	0.160008	1
Solyc02g005185	SL3.0ch02	7414885	7416885	+	3131	5868	3216	6851	34.793	31.946	-2.84679	2.63535e-05	-5.12548e-15	-3.91086	1	1
Solyc02g005315	SL3.0ch02	8061190	8063190	-	3114	6191	2797	5878	33.466	32.242	-1.2238	0.0398339	-5.12548e-15	-3.91086	1	1
Solyc02g005360	SL3.0ch02	8281638	8283638	-	2418	4360	2079	4044	35.674	33.954	-1.7203	0.0213244	-5.12548e-15	-3.91086	1	1
Solyc02g005410	SL3.0ch02	8621839	8623839	-	3786	8478	2789	8053	30.871	25.724	-5.14681	1.24841e-17	-5.12548e-15	-3.91086	1	1
Solyc02g005430	SL3.0ch02	9018072	9020072	+	3853	8019	3433	8065	32.455	29.857	-2.59715	1.56937e-05	-5.12548e-15	-3.91086	1	1
Solyc02g005550	SL3.0ch02	9674052	9676052	-	2446	2074	314	366	54.115	46.176	-7.93857	9.44679e-05	-5.12548e-15	-3.91086	1	1
Solyc02g005555	SL3.0ch02	9681917	9683917	-	1976	1843	1259	1326	51.741	48.704	-3.03723	0.00974713	-5.12548e-15	-3.91086	1	1
Solyc02g005580	SL3.0ch02	9856649	9858649	-	1533	1565	1217	1460	49.484	45.461	-4.0222	0.00150579	-5.12548e-15	-3.91086	1	1
Solyc02g005600	SL3.0ch02	9951141	9953141	+	2044	5506	2189	6415	27.073	25.442	-1.63119	0.0102449	-5.12548e-15	-3.91086	1	1
Solyc02g014320	SL3.0ch02	16235571	16237571	+	2886	6282	2812	7103	31.479	28.361	-3.11799	2.57309e-06	-5.12548e-15	-3.91086	1	1
Solyc02g014405	SL3.0ch02	16725896	16727896	+	4088	5723	3589	5440	41.668	39.75	-1.91782	0.00441027	-5.12548e-15	-3.91086	1	1
Solyc02g014440	SL3.0ch02	17088737	17090737	-	4056	7850	3384	7031	34.067	32.492	-1.57526	0.00715239	-5.12548e-15	-3.91086	1	1
Solyc02g014530	SL3.0ch02	17409856	17411856	+	2962	5271	2749	5656	35.977	32.707	-3.27044	7.78731e-06	3.50992	-3.49209	0.438922	1
Solyc02g014650	SL3.0ch02	18051476	18053476	+	1318	2916	715	1914	31.129	27.197	-3.9323	0.000383207	-5.12548e-15	-3.91086	1	1
Solyc02g014830	SL3.0ch02	19115380	19117380	-	1362	4356	1234	4570	23.82	21.261	-2.55832	0.000697525	-0.772895	-3.56723	1	1
Solyc02g014840	SL3.0ch02	19143831	19145831	+	925	3034	476	2445	23.364	16.296	-7.0687	7.12215e-13	0.0940516	3.1475	0.860462	1
Solyc02g014843	SL3.0ch02	19186284	19188284	+	8009	11094	6467	12555	41.925	33.997	-7.92788	4.32735e-56	-4.15587	-3.04292	0.00953801	0.277468
Solyc02g020930	SL3.0ch02	20835156	20837156	+	1733	3074	1632	3286	36.052	33.184	-2.86737	0.00189455	-5.12548e-15	-3.91086	1	1
Solyc02g020950	SL3.0ch02	21060149	21062149	+	1701	2678	1338	2290	38.844	36.88	-1.96466	0.0361581	-5.12548e-15	-3.91086	1	1
Solyc02g020960	SL3.0ch02	21228624	21230624	-	1449	2333	1238	2169	38.313	36.337	-1.97611	0.0415791	-5.12548e-15	-2.99316	1	1
Solyc02g021050	SL3.0ch02	21880615	21882615	-	476	8675	243	8999	5.202	2.629	-2.57232	3.6988e-19	0.130311	4.74956	0.698627	1
Solyc02g021170	SL3.0ch02	22318246	22320246	-	3035	4557	2857	4653	39.976	38.043	-1.93368	0.00823698	-5.12548e-15	-3.91086	1	1
Solyc02g021350	SL3.0ch02	22991031	22993031	+	4397	11177	3919	10490	28.233	27.198	-1.03467	0.0235932	-5.12548e-15	-1.05344	1	1
Solyc02g021450	SL3.0ch02	23239759	23241759	+	3065	9471	2890	10117	24.45	22.219	-2.23078	2.16014e-05	-5.12548e-15	-3.91086	1	1
Solyc02g021610	SL3.0ch02	23769743	23771743	-	4132	4666	2754	3464	46.965	44.291	-2.67445	0.000830165	-5.12548e-15	-3.91086	1	1
Solyc02g021630	SL3.0ch02	23802646	23804646	+	5642	5347	5505	6232	51.342	46.903	-4.43929	3.58607e-11	-2.00489	-1.96348	0.211544	1
Solyc02g021670	SL3.0ch02	23972136	23974136	+	1125	2725	624	1880	29.221	24.92	-4.30065	0.000137861	-1.9374	-2.64753	0.288546	1
Solyc02g021690	SL3.0ch02	24048893	24050893	-	2267	3901	2252	4170	36.754	35.067	-1.68726	0.024557	0.529473	4.44126	0.0820427	0.836995
Solyc02g021780	SL3.0ch02	24365809	24367809	+	2481	6387	2061	5652	27.977	26.721	-1.25588	0.0349852	-5.12548e-15	-3.91086	1	1
Solyc02g022890	SL3.0ch02	24859150	24861150	+	3827	8218	3812	8783	31.773	30.266	-1.50654	0.00613433	4.52181	-0.0202057	0.000727067	0.0485181
Solyc02g023930	SL3.0ch02	25015051	25017051	+	236511	47265	42419	12074	83.344	77.843	-5.50123	7.44267e-198	-3.81144	-2.26339	0.114387	0.944679
Solyc02g023940	SL3.0ch02	25026697	25028697	-	3329	10354	2998	9833	24.329	23.365	-0.964173	0.0327553	-5.12548e-15	-3.91086	1	1
Solyc02g023990	SL3.0ch02	25170245	25172245	+	10421	6126	10396	7507	62.978	58.068	-4.9097	3.79287e-20	-0.785507	0.875364	0.363393	1
Solyc02g024010	SL3.0ch02	25271859	25273859	+	4203	7526	4134	7860	35.834	34.467	-1.36702	0.0145341	0.452474	3.05701	0.366782	1
Solyc02g030080	SL3.0ch02	25542252	25544252	-	5641	9176	5405	9247	38.071	36.889	-1.18197	0.0186926	-0.297737	6.15283	0.312392	1
Solyc02g030185	SL3.0ch02	25757472	25759472	-	5883	6576	4978	6003	47.219	45.333	-1.88603	0.00237598	-5.12548e-15	-3.91086	1	1
Solyc02g030340	SL3.0ch02	26008746	26010746	+	2449	8314	2454	9069	22.754	21.297	-1.45734	0.00505865	-2.78008	-3.4377	0.277568	1
Solyc02g030360	SL3.0ch02	26015699	26017699	+	1736	4697	1918	5809	26.986	24.822	-2.1638	0.0022059	-0.532586	-0.507351	0.412276	1
Solyc02g030383	SL3.0ch02	26100696	26102696	+	545	4289	438	3896	11.274	10.106	-1.16817	0.0354246	-1.68355	-2.42117	0.403865	1
Solyc02g030387	SL3.0ch02	26223299	26225299	+	2688	4826	2406	4600	35.773	34.342	-1.43123	0.0353828	-5.12548e-15	-3.91086	1	1
Solyc02g030500	SL3.0ch02	26761225	26763225	+	5447	6428	4636	6051	45.869	43.38	-2.48967	0.000129394	-0.102231	-3.14713	1	1
Solyc02g030510	SL3.0ch02	26761625	26763625	+	4005	4779	3562	4834	45.594	42.425	-3.1693	2.37582e-05	-1.51218	-3.56247	0.536076	1
Solyc02g030505	SL3.0ch02	26761658	26763658	+	3963	4650	3492	4729	46.012	42.477	-3.53526	3.66166e-06	0.0279215	-2.31629	1	1
Solyc02g030560	SL3.0ch02	26872922	26874922	-	2479	7245	2545	8076	25.494	23.962	-1.53166	0.00657613	-5.12548e-15	-3.91086	1	1
Solyc02g030620	SL3.0ch02	26989990	26991990	+	3249	10367	2942	9908	23.862	22.895	-0.966692	0.031831	-5.12548e-15	-3.91086	1	1
Solyc02g030630	SL3.0ch02	27035593	27037593	+	2756	9428	3039	10927	22.62	21.76	-0.859841	0.0459008	-5.12548e-15	-3.91086	1	1
Solyc02g031890	SL3.0ch02	27627566	27629566	+	2747	2973	3122	3593	48.024	46.493	-1.53155	0.0427725	-1.22333	-1.86745	0.208589	1
Solyc02g031900	SL3.0ch02	27643071	27645071	-	1806	7594	1898	9352	19.213	16.871	-2.34165	1.14297e-05	0.0336461	7.15266	0.920685	1
Solyc02g032010	SL3.0ch02	27771120	27773120	-	2452	7131	2373	7381	25.587	24.328	-1.2585	0.0224665	-5.12548e-15	-3.91086	1	1
Solyc02g032040	SL3.0ch02	27833999	27835999	+	3082	6989	2632	6645	30.603	28.371	-2.23148	0.000475646	-5.12548e-15	-3.91086	1	1
Solyc02g032080	SL3.0ch02	27925744	27927744	+	3126	4700	2590	4859	39.944	34.77	-5.17401	5.72254e-11	-0.14599	-3.66338	1	1
Solyc02g032090	SL3.0ch02	27937575	27939575	-	1223	1758	1205	2075	41.027	36.738	-4.2887	0.000383182	-5.12548e-15	-3.91086	1	1
Solyc02g032105	SL3.0ch02	28002460	28004460	+	3763	6380	3364	6067	37.099	35.67	-1.42988	0.0198968	-5.12548e-15	-3.91086	1	1
Solyc02g032240	SL3.0ch02	28527536	28529536	-	3458	5409	3029	5212	38.999	36.755	-2.24329	0.001632	-5.12548e-15	-3.91086	1	1
Solyc02g032290	SL3.0ch02	28584250	28586250	+	11694	11543	6792	8191	50.325	45.331	-4.99354	4.80916e-21	-5.12548e-15	-3.91086	1	1
Solyc02g032310	SL3.0ch02	28686566	28688566	+	1987	5014	1700	4661	28.382	26.725	-1.6563	0.0171803	-5.12548e-15	-3.91086	1	1
Solyc02g032410	SL3.0ch02	28930560	28932560	-	4649	9731	3568	8660	32.33	29.179	-3.15069	3.4405e-08	-0.342473	-2.6647	0.845346	1
Solyc02g032460	SL3.0ch02	28986711	28988711	-	263	2195	253	2542	10.7	9.052	-1.64788	0.0231702	-0.27531	1.69982	0.675063	1
Solyc02g032520	SL3.0ch02	29034524	29036524	-	3052	3892	2475	3380	43.952	42.272	-1.68005	0.0285115	2.65295	-3.83504	0.586131	1
Solyc02g032560	SL3.0ch02	29187456	29189456	-	1566	4390	1227	3793	26.293	24.442	-1.85058	0.0146563	-1.95895	-3.87098	1	1
Solyc02g032830	SL3.0ch02	29862836	29864836	-	6048	8749	6664	10336	40.873	39.2	-1.67315	0.00154594	-5.12548e-15	-3.83616	1	1
Solyc02g032983	SL3.0ch02	30067863	30069863	-	3755	3484	2947	2978	51.872	49.738	-2.13341	0.00823949	-5.12548e-15	-3.91086	1	1
Solyc02g032990	SL3.0ch02	30075506	30077506	+	3524	5829	3203	5987	37.678	34.853	-2.82465	5.24301e-05	-5.12548e-15	-3.91086	1	1
Solyc02g033000	SL3.0ch02	30092196	30094196	-	2856	6077	2807	6994	31.971	28.64	-3.33141	7.18865e-07	1.84946	-3.62035	1	1
Solyc02g033040	SL3.0ch02	30182330	30184330	+	6248	7043	6709	7929	47.009	45.833	-1.17649	0.0251711	0.912477	-0.576916	0.249337	1
Solyc02g036140	SL3.0ch02	30592240	30594240	-	2145	6052	1832	5854	26.168	23.836	-2.33257	0.000477841	-5.12548e-15	-3.69406	1	1
Solyc02g036170	SL3.0ch02	30675635	30677635	-	928	3575	1001	4257	20.608	19.038	-1.57083	0.026301	-5.12548e-15	-3.91086	1	1
Solyc02g036210	SL3.0ch02	30802004	30804004	-	5616	4478	5575	4756	55.637	53.964	-1.67321	0.00923706	1.82272	-3.87342	1	1
Solyc02g036350	SL3.0ch02	31050613	31052613	+	1489	12060	1605	13952	10.99	10.317	-0.672842	0.0315639	-0.717736	10.0062	0.329712	1
Solyc02g036370	SL3.0ch02	31085374	31087374	-	3118	11409	3619	14245	21.463	20.259	-1.20486	0.00476919	0.572311	4.70401	0.0846915	0.843642
Solyc02g036380	SL3.0ch02	31147953	31149953	+	5990	10614	6116	11959	36.076	33.837	-2.23885	1.09397e-05	0.477411	5.58307	0.121351	0.966557
Solyc02g037540	SL3.0ch02	31555660	31557660	+	3608	4832	2759	4002	42.749	40.808	-1.94124	0.00904898	1.9202	-2.26348	0.35234	1
Solyc02g038650	SL3.0ch02	31714698	31716698	+	2869	5345	2764	6075	34.928	31.271	-3.65767	4.08543e-07	-5.12548e-15	-3.91086	1	1
Solyc02g038700	SL3.0ch02	31866965	31868965	-	2657	5283	3043	6755	33.463	31.057	-2.40612	0.000469015	-5.12548e-15	-3.91086	1	1
Solyc02g038720	SL3.0ch02	31917144	31919144	-	2907	6632	1948	4997	30.475	28.049	-2.42594	0.000504989	-5.12548e-15	-3.91086	1	1
Solyc02g038790	SL3.0ch02	32032738	32034738	+	3642	5878	3527	6021	38.256	36.94	-1.31663	0.0303329	-5.12548e-15	-3.91086	1	1
Solyc00g007320	SL3.0ch02	32431564	32433564	+	1468	5171	1337	5814	22.112	18.697	-3.41508	7.10281e-07	-5.12548e-15	-3.91086	1	1
Solyc00g007305	SL3.0ch02	32463668	32465668	+	3362	6341	2588	5185	34.649	33.295	-1.35434	0.0306922	-5.12548e-15	-3.91086	1	1
Solyc00g007170	SL3.0ch02	32632348	32634348	-	2855	6309	2837	6835	31.155	29.332	-1.82243	0.00390648	-5.12548e-15	-3.91086	1	1
Solyc00g007120	SL3.0ch02	32664863	32666863	-	169	1008	0	30	14.359	0	-14.3585	0.00857066	0.15234	3.37534	0.694725	1
Solyc00g007040	SL3.0ch02	32748020	32750020	+	2267	5256	1955	4946	30.134	28.329	-1.80503	0.00988838	-4.80796	-3.58612	0.225753	1
Solyc02g061630	SL3.0ch02	33677739	33679739	-	2692	4375	2378	4122	38.093	36.585	-1.50793	0.0340535	-5.12548e-15	-3.91086	1	1
Solyc02g061660	SL3.0ch02	33709435	33711435	-	723	2735	370	3000	20.908	10.979	-9.92881	9.90226e-29	-5.12548e-15	-3.91086	1	1
Solyc02g061710	SL3.0ch02	33776442	33778442	-	2693	6483	1874	5316	29.348	26.064	-3.28432	3.00021e-06	-5.12548e-15	-3.91086	1	1
Solyc02g061810	SL3.0ch02	33869129	33871129	-	4935	4104	3118	2997	54.597	50.989	-3.60738	1.09571e-05	0.0276525	3.56354	0.939993	1
Solyc02g061820	SL3.0ch02	33893258	33895258	-	563	1320	53	1046	29.899	4.823	-25.0765	5.3275e-69	-0.187788	4.59001	0.534396	1
Solyc02g061890	SL3.0ch02	33991595	33993595	-	88	2433	28	1162	3.491	2.353	-1.13774	0.0334754	-5.12548e-15	-3.91086	1	1
Solyc02g061920	SL3.0ch02	34021616	34023616	+	6481	9694	6117	9846	40.068	38.32	-1.74814	0.000902884	-5.12548e-15	-3.86883	1	1
Solyc02g061980	SL3.0ch02	34061227	34063227	+	4060	10252	3519	10595	28.368	24.933	-3.43511	8.46837e-11	0.28066	6.40189	0.295272	1
Solyc02g062010	SL3.0ch02	34130383	34132383	+	712	2328	755	3215	23.421	19.018	-4.40342	6.71709e-06	0.619869	0.135121	0.381481	1
Solyc02g062070	SL3.0ch02	34192800	34194800	+	6159	6625	5785	6810	48.177	45.931	-2.24648	0.00024171	-5.12548e-15	-3.91086	1	1
Solyc02g062090	SL3.0ch02	34211268	34213268	+	6597	8164	5244	6810	44.692	43.504	-1.18786	0.0261084	0.35137	-1.38358	0.716624	1
Solyc02g062400	SL3.0ch02	34541434	34543434	+	6004	9799	5400	9270	37.993	36.81	-1.18297	0.0176087	-5.12548e-15	-3.91086	1	1
Solyc02g062590	SL3.0ch02	34857393	34859393	-	3171	11265	2337	10953	21.966	17.585	-4.38127	1.58711e-19	-0.209136	-3.3412	1	1
Solyc02g062610	SL3.0ch02	34876894	34878894	-	3621	9545	3631	10601	27.503	25.513	-1.98973	0.000143144	-0.774989	2.32769	0.0599405	0.735994
Solyc02g062640	SL3.0ch02	34927317	34929317	+	808	10615	700	10278	7.073	6.376	-0.697059	0.0192851	0.188376	5.19555	0.500429	1
Solyc02g062680	SL3.0ch02	34952321	34954321	-	10272	12943	10251	13410	44.247	43.324	-0.922796	0.0224639	0.0519737	4.29996	0.876443	1
Solyc02g094755	SL3.0ch02	35014112	35016112	+	8371	6267	7849	6112	57.187	56.221	-0.965873	0.046684	1.82565	-3.08582	1	1
Solyc02g062830	SL3.0ch02	35208234	35210234	+	2461	4825	1569	3812	33.777	29.158	-4.61896	3.81293e-08	-5.12548e-15	-3.6388	1	1
Solyc02g062860	SL3.0ch02	35342164	35344164	-	3190	8670	2742	7862	26.897	25.858	-1.03897	0.0378331	-5.12548e-15	-3.91086	1	1
Solyc02g062950	SL3.0ch02	35445561	35447561	-	7492	5833	8887	7407	56.225	54.542	-1.68359	0.00236028	0.24153	5.30032	0.380754	1
Solyc02g062960	SL3.0ch02	35481648	35483648	-	5549	9794	4599	9422	36.166	32.801	-3.36553	1.78309e-09	-6.12735	-2.09695	0.00420334	0.165214
Solyc02g063100	SL3.0ch02	35711354	35713354	-	748	837	540	1139	47.192	32.162	-15.0304	4.88261e-18	1.88175	-3.83186	1	1
Solyc02g063125	SL3.0ch02	35711806	35713806	+	299	842	242	1071	26.205	18.431	-7.77401	3.88233e-06	-5.12548e-15	-3.76338	1	1
Solyc02g063130	SL3.0ch02	35724752	35726752	-	2836	7280	3156	9235	28.035	25.47	-2.5647	1.31622e-05	0.27717	7.67145	0.303687	1
Solyc02g063210	SL3.0ch02	35813730	35815730	-	1883	5564	1494	5161	25.285	22.449	-2.83606	6.47971e-05	-1.82125	-3.72598	0.677685	1
Solyc02g063270	SL3.0ch02	35878605	35880605	-	8520	9704	8645	11246	46.752	43.462	-3.28967	1.66528e-10	-0.916768	6.80791	0.000702339	0.0473094
Solyc02g063380	SL3.0ch02	36015014	36017014	-	3970	8108	3478	7649	32.87	31.257	-1.61238	0.0051041	-0.45723	-1.70984	0.753613	1
Solyc02g063470	SL3.0ch02	36103447	36105447	+	1298	3537	1038	3731	26.846	21.766	-5.08035	8.77902e-09	-1.59922	-3.59505	0.685021	1
Solyc02g063541	SL3.0ch02	36182688	36184688	+	3865	7799	3682	7925	33.136	31.722	-1.41391	0.0116315	-3.64756	-3.72331	0.265957	1
Solyc02g063548	SL3.0ch02	36225343	36227343	-	5095	12311	5488	13820	29.272	28.423	-0.848064	0.0356604	-5.12548e-15	-3.91086	1	1
Solyc02g064770	SL3.0ch02	36446337	36448337	+	4183	11163	3630	10581	27.258	25.544	-1.71432	0.00056815	-2.6865	-0.204043	0.0266459	0.503738
Solyc02g064910	SL3.0ch02	36577004	36579004	+	8605	7923	8517	9338	52.063	47.701	-4.36224	1.43421e-15	-5.12548e-15	-3.91086	1	1
Solyc02g064920	SL3.0ch02	36585452	36587452	-	5047	5351	5005	6115	48.538	45.009	-3.52919	2.2915e-07	-5.12548e-15	-3.91086	1	1
Solyc02g064950	SL3.0ch02	36625852	36627852	-	8678	5656	8787	5969	60.541	59.549	-0.992712	0.0404293	-0.373694	5.67097	0.247487	1
Solyc02g064990	SL3.0ch02	36690113	36692113	-	4913	9698	5217	11398	33.625	31.399	-2.22601	2.27857e-05	0.116163	3.65387	0.746731	1
Solyc02g065000	SL3.0ch02	36694650	36696650	+	5318	6413	5194	7469	45.333	41.017	-4.31574	1.67828e-11	-1.68044	3.18554	0.00101894	0.0628372
Solyc02g065020	SL3.0ch02	36705151	36707151	+	8613	8047	9509	9342	51.699	50.443	-1.25573	0.00993558	-2.21401	-1.80034	0.235396	1
Solyc02g065055	SL3.0ch02	36773932	36775932	-	620	5996	368	4892	9.371	6.996	-2.37502	2.96589e-06	-5.12548e-15	-3.91086	1	1
Solyc02g065080	SL3.0ch02	36825557	36827557	-	1533	5319	1771	6578	22.373	21.212	-1.16091	0.0407805	0.4886	4.51632	0.0838589	0.843257
Solyc02g065270	SL3.0ch02	37007482	37009482	+	5117	3031	3382	2178	62.801	60.827	-1.97335	0.010735	-5.12548e-15	-2.39494	1	1
Solyc02g065280	SL3.0ch02	37008908	37010908	+	3373	6151	2104	4771	35.416	30.604	-4.81216	1.6285e-10	-1.97734	4.52317	0.00236374	0.113738
Solyc02g065320	SL3.0ch02	37060876	37062876	+	281	953	107	955	22.771	10.075	-12.6961	4.27881e-16	-0.963797	-2.76245	0.629503	1
Solyc02g094758	SL3.0ch02	37061935	37063935	+	364	1690	107	996	17.722	9.701	-8.0207	9.43925e-10	1.78295	-2.83909	0.461819	1
Solyc02g065500	SL3.0ch02	37248027	37250027	-	3095	7181	2973	7380	30.119	28.716	-1.40241	0.0146305	-0.417187	4.48819	0.223071	1
Solyc02g065560	SL3.0ch02	37285760	37287760	+	4647	10826	4172	10306	30.033	28.816	-1.21683	0.0112968	0.460631	2.67908	0.321839	1
Solyc02g065610	SL3.0ch02	37346980	37348980	-	2033	7949	1934	8817	20.367	17.989	-2.37764	1.17729e-05	0.70094	2.58883	0.23861	1
Solyc02g065620	SL3.0ch02	37356131	37358131	-	5808	5205	4766	4485	52.738	51.519	-1.21892	0.0405501	0.168906	3.82459	0.589902	1
Solyc02g065660	SL3.0ch02	37383326	37385326	-	9272	5986	8676	6224	60.768	58.228	-2.53993	6.51422e-06	0.182868	4.94557	0.509015	1
Solyc02g065680	SL3.0ch02	37407371	37409371	+	9467	11749	10341	13484	44.622	43.404	-1.218	0.00541333	-0.27009	7.06401	0.405475	1
Solyc02g065690	SL3.0ch02	37415302	37417302	+	8166	5859	8625	6683	58.225	56.343	-1.88151	0.000768862	-5.12548e-15	-3.82595	1	1
Solyc02g065685	SL3.0ch02	37415302	37417302	+	8166	5859	8625	6683	58.225	56.343	-1.88151	0.000768862	-0.277682	-0.0317302	0.693701	1
Solyc02g066830	SL3.0ch02	37545133	37547133	+	1736	6145	1791	6912	22.028	20.579	-1.44855	0.0126666	0.158748	3.9194	0.692708	1
Solyc02g066940	SL3.0ch02	37762236	37764236	-	7370	6658	7478	7291	52.538	50.633	-1.9047	0.000812582	-0.0568021	5.711	0.86128	1
Solyc02g066955	SL3.0ch02	37768120	37770120	+	367	2048	223	1614	15.197	12.139	-3.05733	0.00286603	-0.954698	3.09459	0.0349865	0.573559
Solyc02g067095	SL3.0ch02	37891890	37893890	+	67	341	0	20	16.422	0	-16.4216	0.0271816	0.16681	4.99453	0.543918	1
Solyc02g067180	SL3.0ch02	37936940	37938940	-	7624	7657	7238	9330	49.892	43.687	-6.2054	6.91656e-28	-0.249498	8.57466	0.432605	1
Solyc02g067275	SL3.0ch02	38026047	38028047	-	5095	5853	4559	5623	46.538	44.775	-1.76309	0.00579756	0.417688	1.08304	0.38742	1
Solyc02g067380	SL3.0ch02	38148388	38150388	+	3460	6889	2244	6777	33.433	24.875	-8.55789	4.11844e-38	-0.424839	-1.75279	0.674156	1
Solyc02g067465	SL3.0ch02	38229121	38231121	-	20	194	7	212	9.346	3.196	-6.14945	0.0053542	-5.12548e-15	-3.91086	1	1
Solyc02g067550	SL3.0ch02	38273104	38275104	+	100	2039	4	430	4.675	0.922	-3.75342	5.82229e-05	0.345631	-0.302998	0.71673	1
Solyc02g067630	SL3.0ch02	38329775	38331775	+	5396	4407	6263	6680	55.044	48.389	-6.65528	9.5279e-23	-5.12548e-15	-3.91086	1	1
Solyc02g067640	SL3.0ch02	38335383	38337383	+	898	1819	751	2063	33.051	26.688	-6.36317	2.71757e-07	-5.12548e-15	-3.60824	1	1
Solyc02g067690	SL3.0ch02	38386602	38388602	-	5209	10163	4188	8916	33.886	31.96	-1.92658	0.000403981	-0.0972377	6.19005	0.776263	1
Solyc02g067810	SL3.0ch02	38490263	38492263	+	1956	11545	1532	10846	14.488	12.377	-2.11102	7.02945e-07	0.493998	0.00787978	0.677236	1
Solyc02g067820	SL3.0ch02	38506954	38508954	-	6942	9961	6313	9644	41.07	39.563	-1.50706	0.00325788	0.189436	5.63144	0.480155	1
Solyc02g067830	SL3.0ch02	38511013	38513013	+	1870	11237	1749	11679	14.267	13.025	-1.24216	0.00206721	-0.0938055	0.971786	0.882122	1
Solyc02g067840	SL3.0ch02	38515810	38517810	+	52	1032	13	1008	4.797	1.273	-3.52379	1.71738e-06	0.48332	5.8401	0.166718	1
Solyc02g067860	SL3.0ch02	38528363	38530363	+	1823	7988	1789	11738	18.581	13.225	-5.35578	6.27719e-28	0.393793	5.95759	0.142508	1
Solyc02g067940	SL3.0ch02	38591727	38593727	+	3709	10611	3655	11056	25.901	24.845	-1.05548	0.0199975	-5.12548e-15	-3.91086	1	1
Solyc02g067980	SL3.0ch02	38614728	38616728	-	1227	11743	836	11564	9.46	6.742	-2.71836	4.08706e-15	0.481115	5.53532	0.130963	0.999211
Solyc02g068020	SL3.0ch02	38642601	38644601	+	3961	11301	3619	12857	25.953	21.965	-3.98807	2.04728e-16	-5.12548e-15	-3.91086	1	1
Solyc02g068070	SL3.0ch02	38684163	38686163	+	9255	7268	9230	7601	56.013	54.839	-1.17355	0.0165296	-0.435557	1.48581	0.612886	1
Solyc02g068160	SL3.0ch02	38762290	38764290	-	4638	7382	4297	7303	38.586	37.043	-1.54259	0.00809644	-0.411413	-1.96967	0.732068	1
Solyc02g068280	SL3.0ch02	38827718	38829718	+	3492	10518	3364	10704	24.925	23.912	-1.01263	0.0244029	-0.0896833	6.35715	0.814646	1
Solyc02g068370	SL3.0ch02	38890071	38892071	+	4142	4184	4207	5298	49.748	44.261	-5.48686	4.59556e-13	0.113764	4.62995	0.732886	1
Solyc02g068550	SL3.0ch02	39072306	39074306	-	3130	8806	2698	9127	26.223	22.816	-3.40712	1.42928e-09	-0.213658	2.80352	0.599126	1
Solyc02g068540	SL3.0ch02	39060687	39062687	+	3827	8849	3783	9191	30.191	29.158	-1.0326	0.0345477	-5.12548e-15	-3.91086	1	1
Solyc02g068645	SL3.0ch02	39167788	39169788	-	355	4095	122	1849	7.978	6.19	-1.78778	0.00647579	-0.481332	0.0830412	0.525449	1
Solyc02g068690	SL3.0ch02	39199392	39201392	-	1984	5584	1787	5803	26.216	23.544	-2.67151	0.000110706	0.00997296	4.22425	0.974386	1
Solyc02g068780	SL3.0ch02	39260598	39262598	+	8396	10047	8577	11549	45.524	42.617	-2.90753	1.12674e-08	-0.154674	5.44107	0.639228	1
Solyc02g068790	SL3.0ch02	39273918	39275918	+	79	1449	8	279	5.17	2.787	-2.3827	0.045524	-0.114315	0.191386	0.844996	1
Solyc02g068820	SL3.0ch02	39301619	39303619	-	3764	4972	2795	3979	43.086	41.261	-1.82538	0.0121832	-0.134734	3.98285	0.697086	1
Solyc02g069170	SL3.0ch02	39687256	39689256	-	796	4461	871	6056	15.142	12.574	-2.56773	3.70933e-05	0.568847	1.44332	0.328013	1
Solyc02g069203	SL3.0ch02	39733695	39735695	-	113	1186	22	643	8.699	3.308	-5.39073	2.84765e-06	0.957177	1.26687	0.15417	1
Solyc02g069240	SL3.0ch02	39751780	39753780	-	582	11723	342	8684	4.73	3.789	-0.940731	0.000571451	-0.458409	4.30647	0.224497	1
Solyc02g069320	SL3.0ch02	39817391	39819391	-	3752	11388	3446	11693	24.782	22.762	-2.01963	3.08386e-05	-0.20793	1.9529	0.682503	1
Solyc02g069350	SL3.0ch02	39838562	39840562	+	540	2724	244	2576	16.544	8.652	-7.89164	5.38776e-20	-0.101147	1.68638	0.856625	1
Solyc02g069360	SL3.0ch02	39844377	39846377	+	1262	5849	852	6269	17.747	11.965	-5.78254	8.65133e-22	-5.12548e-15	-3.91086	1	1
Solyc02g069400	SL3.0ch02	39869785	39871785	+	8264	10263	8998	12292	44.605	42.264	-2.3412	2.48853e-06	0.247279	3.82633	0.476027	1
Solyc02g069450	SL3.0ch02	39906558	39908558	-	122	727	10	192	14.37	4.95	-9.41935	9.88899e-05	0.269432	-2.54589	0.83959	1
Solyc02g069460	SL3.0ch02	39909397	39911397	-	3339	6769	3784	8140	33.033	31.734	-1.29892	0.0205275	-0.694063	-1.80943	0.380731	1
Solyc02g069490	SL3.0ch02	39928562	39930562	-	740	10385	709	11371	6.652	5.869	-0.78248	0.00805007	-7.75325	-0.32853	3.42669e-05	0.00469601
Solyc02g069630	SL3.0ch02	40031044	40033044	+	9201	11430	8991	12257	44.598	42.315	-2.28336	2.27533e-06	-0.182498	-0.726051	0.838881	1
Solyc02g069710	SL3.0ch02	40101834	40103834	-	8246	10881	8645	12069	43.112	41.735	-1.37677	0.00333959	-0.0989067	3.89494	0.774181	1
Solyc02g069740	SL3.0ch02	40114886	40116886	+	2216	12630	2079	13120	14.927	13.679	-1.24805	0.00131158	0.68612	-2.75961	0.720595	1
Solyc02g069890	SL3.0ch02	40254860	40256860	+	362	5329	248	4530	6.361	5.19	-1.17046	0.00671495	-5.12548e-15	-3.91086	1	1
Solyc02g069935	SL3.0ch02	40281942	40283942	-	401	4652	373	4915	7.936	7.054	-0.882173	0.0437186	1.23691	1.04376	0.0291476	0.524422
Solyc02g069950	SL3.0ch02	40295935	40297935	+	7038	12644	6889	13046	35.759	34.557	-1.20125	0.00708143	-0.0940721	7.20474	0.702684	1
Solyc02g070010	SL3.0ch02	40375954	40377954	-	8176	7689	9069	9816	51.535	48.022	-3.51259	1.02985e-10	-5.12548e-15	-3.91086	1	1
Solyc02g070020	SL3.0ch02	40379067	40381067	-	2142	12117	2007	13467	15.022	12.97	-2.05195	3.58572e-07	0.472917	8.45392	0.442271	1
Solyc02g070080	SL3.0ch02	40486838	40488838	+	6778	6049	7373	7225	52.842	50.507	-2.33474	8.96874e-05	-1.93383	-3.87151	1	1
Solyc02g070100	SL3.0ch02	40501301	40503301	+	6352	7346	7060	8702	46.372	44.791	-1.58046	0.00396308	0.292623	5.68842	0.286959	1
Solyc02g070180	SL3.0ch02	40533267	40535267	-	8838	10481	7825	11308	45.748	40.898	-4.84978	2.6856e-21	1.95209	-0.567037	0.243815	1
Solyc02g070190	SL3.0ch02	40535963	40537963	-	2073	3183	2618	4277	39.441	37.97	-1.4711	0.047676	-5.12548e-15	-3.91086	1	1
Solyc02g070230	SL3.0ch02	40556818	40558818	-	630	2742	455	2648	18.683	14.663	-4.02004	1.25712e-05	-0.83509	2.09816	0.0669925	0.772963
Solyc02g070310	SL3.0ch02	40662617	40664617	-	3725	9651	2417	7981	27.848	23.245	-4.60353	1.69822e-15	-0.078504	9.35392	0.794263	1
Solyc02g070440	SL3.0ch02	40740362	40742362	+	3069	9249	3381	11650	24.915	22.494	-2.42125	2.63368e-06	0.194967	4.55427	0.536725	1
Solyc02g070450	SL3.0ch02	40754842	40756842	-	3550	9939	3318	10471	26.318	24.063	-2.25508	1.54622e-05	2.05021	-0.0714167	0.0382143	0.599021
Solyc02g070480	SL3.0ch02	40787291	40789291	+	6902	8601	6345	9400	44.52	40.299	-4.22191	8.36043e-14	-0.0121677	3.84979	0.977449	1
Solyc02g070483	SL3.0ch02	40788231	40790231	+	5947	5969	5384	5856	49.908	47.9	-2.00733	0.00144697	0.17679	3.57696	0.608981	1
Solyc02g070520	SL3.0ch02	40818103	40820103	+	8510	6967	9348	8411	54.985	52.638	-2.34672	1.57703e-05	0.107565	4.85629	0.743986	1
Solyc02g070560	SL3.0ch02	40864406	40866406	+	979	4949	941	5654	16.515	14.268	-2.24646	0.000352914	0.182056	4.55935	0.547762	1
Solyc02g070570	SL3.0ch02	40869633	40871633	+	399	2034	432	3442	16.4	11.151	-5.24824	3.5577e-09	0.302787	8.66759	0.317899	1
Solyc02g070580	SL3.0ch02	40873906	40875906	+	139	3025	118	3568	4.393	3.201	-1.19187	0.00605863	0.189824	4.02747	0.621091	1
Solyc02g070650	SL3.0ch02	40900084	40902084	+	842	2174	930	3253	27.918	22.233	-5.68492	4.38929e-08	0.385218	7.19389	0.256103	1
Solyc02g070730	SL3.0ch02	40943291	40945291	-	279	8104	185	6583	3.328	2.733	-0.594713	0.0189627	-0.362252	-1.16297	0.799981	1
Solyc02g070740	SL3.0ch02	40938699	40940699	+	1950	7244	1650	6892	21.209	19.316	-1.89317	0.0011648	-5.12548e-15	-3.79492	1	1
Solyc02g070760	SL3.0ch02	40949794	40951794	-	1142	5267	1087	6169	17.819	14.981	-2.83799	7.30221e-06	-0.618237	2.07981	0.176805	1
Solyc02g070855	SL3.0ch02	41005706	41007706	+	262	5308	170	5111	4.704	3.219	-1.48468	6.34605e-05	-0.323105	2.96319	0.379636	1
Solyc02g070880	SL3.0ch02	41046640	41048640	+	59	1971	2	685	2.906	0.291	-2.61528	6.66037e-06	0.147511	5.68727	0.586715	1
Solyc02g070890	SL3.0ch02	41054265	41056265	+	2005	7077	1304	6852	22.077	15.988	-6.08841	1.0438e-23	1.12983	4.9474	0.0382867	0.599446
Solyc02g070970	SL3.0ch02	41078368	41080368	+	2362	7141	2039	7722	24.855	20.889	-3.96606	8.74517e-11	-6.78089	-0.314039	5.63514e-05	0.00692638
Solyc02g071000	SL3.0ch02	41085549	41087549	+	238	2951	133	3313	7.463	3.86	-3.60361	2.76617e-10	-9.3572	-0.910736	1.1142e-05	0.00194404
Solyc02g071100	SL3.0ch02	41152758	41154758	-	5228	10077	5264	11280	34.159	31.818	-2.34059	7.89894e-06	-0.223975	3.20226	0.699916	1
Solyc02g071110	SL3.0ch02	41163057	41165057	-	12228	11356	13413	13493	51.849	49.851	-1.99738	6.61476e-06	0.67187	5.03912	0.105862	0.914828
Solyc02g071130	SL3.0ch02	41180342	41182342	-	1910	10274	1241	9250	15.676	11.829	-3.84711	1.35765e-16	4.07423	0.58249	0.0234946	0.471314
Solyc02g071140	SL3.0ch02	41203961	41205961	-	4753	9012	4244	9760	34.53	30.306	-4.22398	1.03675e-13	0.695764	2.53308	0.147365	1
Solyc02g071200	SL3.0ch02	41242089	41244089	+	477	3533	341	2983	11.895	10.259	-1.63654	0.0146919	-0.713993	3.09236	0.121894	0.967684
Solyc02g071240	SL3.0ch02	41266085	41268085	+	5684	11166	6060	12496	33.733	32.658	-1.07504	0.0170085	0.75863	3.21896	0.058849	0.730365
Solyc02g071270	SL3.0ch02	41328603	41330603	-	3361	7190	3263	8739	31.855	27.187	-4.66767	3.41849e-14	-0.143875	5.56115	0.662792	1
Solyc02g071380	SL3.0ch02	41425503	41427503	-	6728	8640	7344	9833	43.779	42.755	-1.02444	0.0308817	-0.169127	-1.50219	0.886489	1
Solyc02g071430	SL3.0ch02	41452299	41454299	-	1694	8644	1593	8863	16.386	15.235	-1.15088	0.0126341	4.96258	-2.68921	0.0612357	0.743199
Solyc02g071490	SL3.0ch02	41478605	41480605	-	130	1882	33	777	6.461	4.074	-2.38716	0.00866614	0.938824	3.18802	0.0581917	0.726746
Solyc02g071540	SL3.0ch02	41504918	41506918	-	7812	9168	8466	10354	46.007	44.984	-1.02301	0.0264753	-5.73788	-3.17843	0.125751	0.982038
Solyc02g071583	SL3.0ch02	41542619	41544619	+	22	171	32	628	11.399	4.848	-6.55048	0.00135093	-5.12548e-15	-3.91086	1	1
Solyc02g071587	SL3.0ch02	41554898	41556898	-	112	1318	44	927	7.832	4.531	-3.30076	0.000848872	-1.70698	-3.12449	0.454797	1
Solyc02g071685	SL3.0ch02	41615603	41617603	+	118	1220	8	193	8.819	3.98	-4.83903	0.0099946	1.61361	-0.280795	0.0417832	0.627415
Solyc02g071750	SL3.0ch02	41691952	41693952	-	1819	4763	1667	4948	27.636	25.2	-2.43567	0.00102759	0.408395	4.61015	0.176039	1
Solyc02g071760	SL3.0ch02	41693593	41695593	-	517	2352	522	3147	18.02	14.227	-3.79291	2.96037e-05	-3.19452	-0.325491	0.0183937	0.409146
Solyc02g071850	SL3.0ch02	41773962	41775962	-	149	615	34	302	19.503	10.119	-9.38357	7.68065e-05	-5.12548e-15	-3.91086	1	1
Solyc02g071960	SL3.0ch02	41866529	41868529	+	3242	8134	3005	8030	28.499	27.232	-1.26706	0.0183967	-5.12548e-15	-3.91086	1	1
Solyc02g072000	SL3.0ch02	41890312	41892312	+	2790	9986	2394	9879	21.838	19.506	-2.33159	5.01664e-06	0.637846	5.69689	0.0502905	0.681103
Solyc02g072020	SL3.0ch02	41895047	41897047	+	26	1309	10	967	1.948	1.024	-0.924024	0.0423027	-0.29427	0.740168	0.635657	1
Solyc02g072080	SL3.0ch02	41921994	41923994	-	904	11572	817	12556	7.246	6.109	-1.13659	0.000193149	-0.24016	7.41285	0.658142	1
Solyc02g072160	SL3.0ch02	42038192	42040192	+	3430	8288	2974	7653	29.271	27.985	-1.28589	0.0176998	-0.804398	4.91114	0.0107462	0.297232
Solyc02g072220	SL3.0ch02	42095833	42097833	+	1627	7815	1223	7443	17.232	14.113	-3.11889	9.88077e-09	-0.0620391	1.1805	0.956238	1
Solyc02g072270	SL3.0ch02	42135168	42137168	-	214	1874	162	1952	10.249	7.663	-2.58584	0.00215226	-0.638775	3.17283	0.101841	0.903866
Solyc02g072370	SL3.0ch02	42178751	42180751	-	44	1538	6	539	2.781	1.101	-1.68037	0.0164227	2.6236	1.99568	0.523994	1
Solyc02g072490	SL3.0ch02	42243957	42245957	+	1301	1020	298	310	56.053	49.013	-7.04027	0.00137583	-5.12548e-15	-3.91086	1	1
Solyc02g072540	SL3.0ch02	42299510	42301510	-	592	2361	460	2278	20.047	16.801	-3.24683	0.00107762	-4.45768	-3.65227	0.269574	1
Solyc02g073576	SL3.0ch02	42330159	42332159	-	3487	8349	3353	8418	29.461	28.485	-0.975706	0.0464841	-5.12548e-15	-3.87249	1	1
Solyc02g076830	SL3.0ch02	42516782	42518782	-	2026	7470	1936	7592	21.335	20.319	-1.01624	0.0411763	1.83653	-3.37053	1	1
Solyc02g076855	SL3.0ch02	42547633	42549633	-	2727	8974	2551	9081	23.306	21.931	-1.37482	0.00690342	-5.12548e-15	-3.91086	1	1
Solyc02g076860	SL3.0ch02	42550568	42552568	-	653	7397	140	5807	8.112	2.354	-5.75767	1.26557e-51	-5.12548e-15	-2.70117	1	1
Solyc02g076920	SL3.0ch02	42591747	42593747	+	6991	5716	6192	5613	55.017	52.452	-2.56457	4.72777e-05	0.0774505	0.489286	0.928644	1
Solyc02g076970	SL3.0ch02	42627279	42629279	+	61	885	0	100	6.448	0	-6.4482	0.00179492	-0.0223342	-2.03745	1	1
Solyc02g077020	SL3.0ch02	42660370	42662370	+	7475	8494	7382	9691	46.809	43.238	-3.57158	1.02018e-10	-5.12548e-15	-3.91086	1	1
Solyc02g077030	SL3.0ch02	42671786	42673786	+	995	2449	249	1090	28.891	18.596	-10.2949	1.87234e-13	-3.8733	-2.77402	0.0187646	0.41234
Solyc02g077070	SL3.0ch02	42696194	42698194	-	1864	6115	1400	5860	23.361	19.284	-4.07758	1.13892e-09	-0.908194	0.673172	0.268609	1
Solyc02g077150	SL3.0ch02	42753814	42755814	-	531	8933	480	9305	5.611	4.905	-0.705268	0.0158759	-5.12548e-15	-3.91086	1	1
Solyc02g077225	SL3.0ch02	42788774	42790774	+	3301	8827	2451	8329	27.218	22.737	-4.48146	1.06485e-14	1.76315	-2.41717	0.524347	1
Solyc02g077315	SL3.0ch02	42849583	42851583	+	61	642	7	379	8.677	1.813	-6.86363	1.46924e-06	0.418034	-0.00325332	0.488566	1
Solyc02g077320	SL3.0ch02	42859090	42861090	-	961	7033	1094	8663	12.022	11.212	-0.809053	0.0444608	0.0341177	4.5798	0.914967	1
Solyc02g077340	SL3.0ch02	42876922	42878922	-	6954	7670	6442	8016	47.552	44.557	-2.99532	3.17166e-07	-5.12548e-15	-3.91086	1	1
Solyc02g077460	SL3.0ch02	42962305	42964305	-	127	2527	33	1331	4.785	2.419	-2.36588	0.000166277	-0.0181845	4.22357	0.956995	1
Solyc02g077730	SL3.0ch02	43173704	43175704	+	2865	5750	1680	4509	33.256	27.145	-6.11101	3.26651e-15	0.282295	4.12539	0.488147	1
Solyc02g077830	SL3.0ch02	43247351	43249351	+	609	5253	349	4061	10.389	7.914	-2.47511	1.51557e-05	1.88548	-3.12736	1	1
Solyc02g077860	SL3.0ch02	43267938	43269938	+	1376	7233	1403	7919	15.983	15.05	-0.932855	0.0411737	-2.80908	-1.96994	0.0520099	0.693879
Solyc02g078100	SL3.0ch02	43451944	43453944	-	4034	8378	3396	7562	32.501	30.991	-1.50975	0.00766777	-5.12548e-15	-2.60765	1	1
Solyc02g078270	SL3.0ch02	43580084	43582084	+	1854	2514	898	2198	42.445	29.005	-13.4399	4.9709e-32	0.365067	2.75717	0.38219	1
Solyc02g078280	SL3.0ch02	43592275	43594275	-	3298	2608	4064	3433	55.842	54.208	-1.63317	0.0302124	0.189867	0.915476	0.730888	1
Solyc02g078300	SL3.0ch02	43614913	43616913	-	3569	10734	3247	12081	24.953	21.183	-3.76935	2.69596e-14	0.715132	3.18192	0.0734331	0.796894
Solyc02g078340	SL3.0ch02	43631463	43633463	+	11120	8469	11814	9473	56.767	55.499	-1.26789	0.00574511	4.05623	-1.30309	0.0907766	0.868155
Solyc02g078350	SL3.0ch02	43635538	43637538	+	2889	10058	2763	10762	22.314	20.429	-1.88521	0.000138799	-0.371796	2.00211	0.441788	1
Solyc02g078360	SL3.0ch02	43647455	43649455	-	11200	9215	11544	10157	54.862	53.196	-1.66592	0.000426142	0.301087	6.13615	0.25321	1
Solyc02g078660	SL3.0ch02	43894728	43896728	-	252	9139	154	9316	2.683	1.626	-1.05723	6.00915e-07	-1.43132	2.30232	0.0795738	0.826901
Solyc02g078665	SL3.0ch02	43896141	43898141	-	1515	7444	1756	9918	16.91	15.042	-1.8684	0.000201898	-0.155446	-1.72617	0.917263	1
Solyc02g078670	SL3.0ch02	43903546	43905546	-	3540	10693	3395	10850	24.872	23.833	-1.03885	0.0215806	-0.484081	6.43832	0.142989	1
Solyc02g078690	SL3.0ch02	43929001	43931001	-	2152	5149	2474	7819	29.475	24.036	-5.43966	1.73727e-15	-2.05134	-1.47694	0.102736	0.90658
Solyc02g078720	SL3.0ch02	43952523	43954523	+	730	7161	505	8185	9.251	5.811	-3.43977	9.17459e-17	0.291088	0.491471	0.649732	1
Solyc02g079020	SL3.0ch02	44199609	44201609	-	177	2978	144	2979	5.61	4.611	-0.999192	0.036527	0.0464433	4.03738	0.89237	1
Solyc02g079110	SL3.0ch02	44275552	44277552	+	278	2552	153	1928	9.823	7.352	-2.47109	0.00162216	-0.127556	3.39502	0.79666	1
Solyc02g079300	SL3.0ch02	44473014	44475014	-	2537	6379	2351	6543	28.454	26.434	-2.02091	0.0016619	-0.372339	4.0533	0.248223	1
Solyc02g079320	SL3.0ch02	44484028	44486028	-	337	848	584	2373	28.439	19.75	-8.68907	3.02079e-09	-0.653303	1.48707	0.398531	1
Solyc02g079330	SL3.0ch02	44488594	44490594	-	3004	10947	2749	11083	21.533	19.874	-1.6583	0.000453046	-0.518567	0.0280576	0.632502	1
Solyc02g079340	SL3.0ch02	44497290	44499290	-	563	1549	329	1127	26.657	22.596	-4.06104	0.00350711	-1.01176	1.74183	0.264819	1
Solyc02g079470	SL3.0ch02	44572037	44574037	-	95	1853	17	550	4.877	2.998	-1.87856	0.0311977	-5.12548e-15	-3.91086	1	1
Solyc02g079590	SL3.0ch02	44669520	44671520	+	2397	7162	2106	7244	25.076	22.524	-2.55178	3.11945e-05	-0.519923	5.7382	0.29251	1
Solyc02g079730	SL3.0ch02	44734117	44736117	+	3911	5819	3852	6123	40.195	38.617	-1.57873	0.0127039	-1.04817	3.42577	0.00855758	0.260278
Solyc02g079810	SL3.0ch02	44796350	44798350	-	768	3813	368	3773	16.765	8.887	-7.87816	1.28811e-27	0.102776	1.44669	0.929435	1
Solyc02g079820	SL3.0ch02	44796313	44798313	+	769	3953	382	3908	16.285	8.904	-7.38104	1.45366e-25	-5.12548e-15	-3.91086	1	1
Solyc02g079980	SL3.0ch02	44904074	44906074	-	2269	8495	2131	9347	21.08	18.566	-2.51357	2.42346e-06	-0.6786	-0.280561	0.542147	1
Solyc02g080165	SL3.0ch02	45025817	45027817	+	3498	5305	3813	6600	39.736	36.618	-3.11876	8.24065e-06	0.668937	-0.583673	0.476682	1
Solyc02g080200	SL3.0ch02	45044747	45046747	-	7738	7881	8549	9072	49.542	48.516	-1.02625	0.0310352	-5.12548e-15	-3.91086	1	1
Solyc02g080240	SL3.0ch02	45063214	45065214	+	112	1772	87	2201	5.945	3.802	-2.14235	0.000857695	-5.12548e-15	-3.91086	1	1
Solyc02g080330	SL3.0ch02	45131348	45133348	+	632	6929	580	7949	8.359	6.8	-1.55835	0.000150931	-1.95893	-3.87098	1	1
Solyc02g080355	SL3.0ch02	45155854	45157854	+	25	485	0	120	4.902	0	-4.90196	0.00444081	-0.212669	-0.489861	0.78339	1
Solyc02g080450	SL3.0ch02	45215436	45217436	+	3468	9843	2575	8699	26.054	22.84	-3.21348	6.80743e-09	-1.9572	-2.49866	0.208842	1
Solyc02g080460	SL3.0ch02	45224779	45226779	-	13546	16133	12965	16642	45.642	43.79	-1.85138	5.32899e-06	1.46488	-2.4561	0.225584	1
Solyc02g080580	SL3.0ch02	45332422	45334422	+	1313	7115	1101	6411	15.579	14.657	-0.922473	0.0495265	-2.87837	-3.26972	0.162819	1
Solyc02g080620	SL3.0ch02	45359170	45361170	+	7449	9398	6657	8992	44.216	42.539	-1.67613	0.00151928	-1.38277	0.847284	0.188196	1
Solyc02g080650	SL3.0ch02	45385474	45387474	+	91	2412	56	2033	3.636	2.681	-0.954929	0.0370287	-0.113857	3.61372	0.772083	1
Solyc02g080720	SL3.0ch02	45427425	45429425	+	3506	6650	3188	6747	34.521	32.089	-2.43289	0.000189091	-5.12548e-15	-3.91086	1	1
Solyc02g080730	SL3.0ch02	45433358	45435358	+	4030	9923	3926	10341	28.883	27.518	-1.36463	0.00627443	-5.12548e-15	-3.91086	1	1
Solyc02g080740	SL3.0ch02	45433358	45435358	+	4030	9923	3926	10341	28.883	27.518	-1.36463	0.00627443	-1.95892	-3.87098	1	1
Solyc02g080755	SL3.0ch02	45449005	45451005	+	3549	9283	3228	9173	27.657	26.03	-1.62726	0.00220841	-5.12548e-15	-3.91086	1	1
Solyc02g080790	SL3.0ch02	45473114	45475114	-	2895	10908	2646	11473	20.974	18.741	-2.233	2.80421e-06	-0.188058	-1.64262	0.860904	1
Solyc02g080860	SL3.0ch02	45524480	45526480	-	9481	8398	10041	9555	53.029	51.24	-1.78864	0.00037896	-2.5204	-3.57811	0.444801	1
Solyc02g080890	SL3.0ch02	45549047	45551047	-	1625	10720	1592	11712	13.163	11.966	-1.1969	0.00238082	0.400352	4.85464	0.539629	1
Solyc02g080900	SL3.0ch02	45561165	45563165	+	3486	5790	3525	6876	37.581	33.891	-3.68988	7.96837e-08	0.428432	1.37111	0.507685	1
Solyc02g081040	SL3.0ch02	45664512	45666512	-	12	154	3	242	7.229	1.224	-6.00443	0.00137079	-0.128627	-2.80765	1	1
Solyc02g081110	SL3.0ch02	45725102	45727102	+	2752	3755	2624	3990	42.293	39.673	-2.6195	0.00151691	-5.12548e-15	-3.91086	1	1
Solyc02g081086	SL3.0ch02	45725102	45727102	+	2752	3755	2624	3990	42.293	39.673	-2.6195	0.00151691	-5.12548e-15	-3.91086	1	1
Solyc02g081230	SL3.0ch02	45822769	45824769	-	292	6113	157	4373	4.559	3.466	-1.09315	0.00273706	-0.3148	0.779308	0.555622	1
Solyc02g081260	SL3.0ch02	45845920	45847920	+	236	2515	63	904	8.579	6.515	-2.0637	0.0232308	-0.461877	0.593429	0.449235	1
Solyc02g081430	SL3.0ch02	45958176	45960176	+	3398	11342	3392	12448	23.053	21.414	-1.63878	0.000399631	0.0339809	1.99042	0.963353	1
Solyc02g081440	SL3.0ch02	45958176	45960176	+	3398	11342	3392	12448	23.053	21.414	-1.63878	0.000399631	-0.451604	-1.93845	0.713634	1
Solyc02g081500	SL3.0ch02	45987015	45989015	+	56	1004	7	286	5.283	2.389	-2.89394	0.0208183	-0.73196	4.66583	0.110344	0.933045
Solyc02g081505	SL3.0ch02	45987064	45989064	+	56	937	7	286	5.639	2.389	-3.2504	0.0112675	-5.12548e-15	-3.91086	1	1
Solyc02g081510	SL3.0ch02	45996011	45998011	+	79	1343	36	1386	5.556	2.532	-3.02391	4.23191e-05	-2.88135	-2.71518	0.124106	0.976251
Solyc02g081520	SL3.0ch02	46011464	46013464	-	4722	11481	4484	11945	29.143	27.293	-1.84955	0.000157021	0.0564412	4.46568	0.846153	1
Solyc02g081540	SL3.0ch02	46017601	46019601	-	1411	5930	1031	5589	19.221	15.574	-3.6468	1.67576e-08	5.11571	-2.12965	0.0317468	0.546974
Solyc02g081700	SL3.0ch02	46110366	46112366	+	183	2659	21	751	6.439	2.72	-3.71892	2.48528e-05	0.675679	7.61772	0.0351606	0.573642
Solyc02g081900	SL3.0ch02	46219574	46221574	+	2307	3752	2637	4670	38.076	36.089	-1.98691	0.0100256	-1.07583	0.210823	0.0522869	0.694749
Solyc02g082280	SL3.0ch02	46538070	46540070	+	8961	8087	8768	8616	52.563	50.437	-2.12617	6.15445e-05	0.00925869	4.74303	0.979226	1
Solyc02g082390	SL3.0ch02	46627406	46629406	-	1888	8417	1564	7509	18.321	17.238	-1.08324	0.0252482	-4.61193	-3.32695	0.167167	1
Solyc02g082430	SL3.0ch02	46678842	46680842	-	6602	12479	6746	13677	34.6	33.031	-1.56848	0.000673595	0.21784	5.93979	0.504123	1
Solyc02g082520	SL3.0ch02	46754162	46756162	+	80	822	0	156	8.869	0	-8.86918	3.24532e-06	-2.03623	-0.684979	0.310491	1
Solyc02g082550	SL3.0ch02	46776440	46778440	+	7430	6832	6548	6486	52.096	50.238	-1.85864	0.00137894	-0.139995	5.50416	0.758093	1
Solyc02g082600	SL3.0ch02	46803348	46805348	+	164	1323	65	807	11.029	7.454	-3.57479	0.00293496	0.132928	2.84056	0.742481	1
Solyc02g082800	SL3.0ch02	47008866	47010866	-	7947	12144	7338	12125	39.555	37.702	-1.85272	0.000117584	-0.00183665	7.02499	0.994593	1
Solyc02g082810	SL3.0ch02	47009387	47011387	+	8756	12650	7760	12442	40.904	38.412	-2.49238	2.16764e-07	0.251701	3.63046	0.469948	1
Solyc02g082830	SL3.0ch02	47032568	47034568	+	3532	8864	3589	9869	28.493	26.668	-1.82491	0.000706452	0.195709	5.14558	0.554256	1
Solyc02g082880	SL3.0ch02	47080753	47082753	+	2065	9370	2213	10706	18.059	17.13	-0.928783	0.0290484	-5.12548e-15	-3.02603	1	1
Solyc02g082960	SL3.0ch02	47117362	47119362	+	326	524	529	1048	38.353	33.545	-4.80824	0.00998433	-3.42733	-3.40041	0.388791	1
Solyc02g082990	SL3.0ch02	47135209	47137209	+	3555	11546	2857	10721	23.541	21.041	-2.5001	4.08256e-07	-0.125925	-3.79464	1	1
Solyc02g083010	SL3.0ch02	47142137	47144137	+	1217	2777	1343	4109	30.471	24.633	-5.83754	4.50025e-10	-1.99596	-1.38881	0.0871997	0.854643
Solyc02g083060	SL3.0ch02	47173468	47175468	-	111	798	16	356	12.211	4.301	-7.91015	6.37851e-06	0.113452	-1.77544	0.953201	1
Solyc02g083150	SL3.0ch02	47216129	47218129	-	2179	3476	2737	4802	38.532	36.305	-2.22772	0.00532845	0.142739	4.326	0.632567	1
Solyc02g083200	SL3.0ch02	47243559	47245559	-	6294	8722	5280	7846	41.915	40.226	-1.68978	0.00253272	-2.0296	-2.76167	0.3699	1
Solyc02g083300	SL3.0ch02	47308420	47310420	-	3057	11769	2972	12045	20.619	19.791	-0.828279	0.0367238	-5.12548e-15	-3.91086	1	1
Solyc02g083380	SL3.0ch02	47363087	47365087	+	58	618	33	524	8.58	5.925	-2.65529	0.0386485	0.221049	5.66945	0.586261	1
Solyc02g083440	SL3.0ch02	47401009	47403009	+	925	4242	535	4872	17.902	9.895	-8.00749	3.091e-32	-3.94248	-3.68723	0.227759	1
Solyc02g083450	SL3.0ch02	47402751	47404751	+	2504	9720	2119	11122	20.484	16.003	-4.48097	6.40399e-20	0.142757	2.63722	0.781647	1
Solyc02g083500	SL3.0ch02	47428311	47430311	+	7283	8646	7080	9297	45.722	43.231	-2.49028	5.97191e-06	-0.172894	2.63437	0.69134	1
Solyc02g083610	SL3.0ch02	47514187	47516187	-	753	11515	516	8953	6.138	5.449	-0.688559	0.0172392	0.494235	-0.404113	0.516151	1
Solyc02g083640	SL3.0ch02	47528426	47530426	-	220	4498	182	5225	4.663	3.366	-1.29699	0.000608083	-1.38949	-3.03807	0.516083	1
Solyc02g083650	SL3.0ch02	47533169	47535169	-	3976	10328	3450	9554	27.796	26.53	-1.26612	0.010417	0.358786	5.71589	0.227977	1
Solyc02g083660	SL3.0ch02	47534587	47536587	+	2391	9389	2226	10494	20.297	17.5	-2.79711	2.79747e-08	-5.12548e-15	-3.91086	1	1
Solyc02g083700	SL3.0ch02	47562625	47564625	-	3422	6929	3209	7795	33.06	29.162	-3.89748	1.06739e-09	-0.54189	6.48279	0.130346	0.995776
Solyc02g083890	SL3.0ch02	47693325	47695325	+	1125	10330	797	9102	9.821	8.051	-1.76972	5.74741e-06	0.30689	-0.229121	0.728126	1
Solyc02g084090	SL3.0ch02	47844921	47846921	-	268	2104	100	1290	11.298	7.194	-4.10424	3.23196e-05	3.4828	-1.41957	0.00921515	0.272403
Solyc02g084117	SL3.0ch02	47879052	47881052	-	2884	5896	759	6344	32.847	10.686	-22.1618	6.95351e-252	3.20552	0.81211	0.0196682	0.423677
Solyc02g084190	SL3.0ch02	47926541	47928541	-	4256	6206	6303	10321	40.681	37.915	-2.7655	5.264e-06	1.47043	-1.59189	0.451335	1
Solyc02g084220	SL3.0ch02	47944563	47946563	-	86	1124	7	491	7.107	1.406	-5.70182	2.49864e-07	1.39275	3.15771	0.000723654	0.0484
Solyc02g084285	SL3.0ch02	47987429	47989429	+	327	2247	236	1895	12.704	11.075	-1.62935	0.04478	1.4016	1.14302	0.0834547	0.841558
Solyc02g084315	SL3.0ch02	48000977	48002977	+	5154	5243	5765	6242	49.572	48.014	-1.55833	0.011029	-0.249777	1.19438	0.74135	1
Solyc02g084350	SL3.0ch02	48021709	48023709	-	3083	7177	2869	7399	30.049	27.941	-2.10756	0.000601798	-5.12548e-15	-3.91086	1	1
Solyc02g084440	SL3.0ch02	48090998	48092998	-	5167	6028	5258	6745	46.155	43.806	-2.34882	0.000234981	0.164635	9.78173	0.725807	1
Solyc02g084450	SL3.0ch02	48092231	48094231	+	9281	8292	9261	9117	52.814	50.392	-2.4222	3.97375e-06	-0.944199	2.98219	0.0380569	0.598338
Solyc02g084480	SL3.0ch02	48117364	48119364	+	25344	26479	17444	18858	48.905	48.052	-0.852477	0.00724004	-0.683992	6.1511	0.0923467	0.87244
Solyc02g084500	SL3.0ch02	48232881	48234881	-	432	160	8969	8853	72.973	50.325	-22.6475	1.14458e-27	0.393932	4.72219	0.18464	1
Solyc02g084530	SL3.0ch02	48250719	48252719	+	498	739	575	1818	40.259	24.028	-16.2303	4.08496e-23	-3.48934	-1.67711	0.0439724	0.645121
Solyc02g084560	SL3.0ch02	48276382	48278382	+	137	2482	29	1287	5.231	2.204	-3.02736	4.05987e-06	0.186966	2.84886	0.640031	1
Solyc02g084620	SL3.0ch02	48348714	48350714	-	5188	6496	6246	10417	44.403	37.484	-6.91836	1.07808e-30	-0.0729289	4.1958	0.822015	1
Solyc02g084640	SL3.0ch02	48373296	48375296	+	8046	10235	8328	12317	44.013	40.339	-3.67384	4.20222e-13	0.226948	3.68108	0.772136	1
Solyc02g084680	SL3.0ch02	48413576	48415576	+	2461	7974	2724	10651	23.584	20.366	-3.21774	3.32787e-09	0.0801676	-0.744216	0.972578	1
Solyc02g084720	SL3.0ch02	48462070	48464070	-	1350	7866	1308	9059	14.648	12.617	-2.03148	2.82934e-05	0.329237	5.83633	0.454127	1
Solyc02g084760	SL3.0ch02	48497044	48499044	+	4219	10471	3837	11643	28.72	24.787	-3.9334	2.4514e-14	0.597564	5.78615	0.0382175	0.599021
Solyc02g084860	SL3.0ch02	48569256	48571256	-	1446	5322	1613	6398	21.365	20.135	-1.23043	0.0325572	-0.539779	-1.11671	0.680542	1
Solyc02g084890	SL3.0ch02	48590733	48592733	-	2373	2594	5505	8318	47.775	39.825	-7.95039	9.95963e-22	3.95634	6.12622	7.34565e-10	3.75342e-07
Solyc02g085000	SL3.0ch02	48675124	48677124	-	6415	5601	12140	12564	53.387	49.142	-4.24531	4.39635e-14	0.119793	5.98245	0.66945	1
Solyc02g085070	SL3.0ch02	48718759	48720759	+	200	2392	195	2912	7.716	6.276	-1.4399	0.0186132	-5.12548e-15	-3.80407	1	1
Solyc02g085090	SL3.0ch02	48725737	48727737	+	362	3574	246	4469	9.197	5.217	-3.97976	1.18348e-12	2.40707	-2.51954	0.234081	1
Solyc02g085100	SL3.0ch02	48733232	48735232	-	46	2090	19	1533	2.154	1.224	-0.929331	0.0213092	-0.451787	4.25811	0.249162	1
Solyc02g085120	SL3.0ch02	48741413	48743413	-	649	8425	362	8498	7.152	4.086	-3.06652	9.17827e-19	0.127207	-2.21454	1	1
Solyc02g085210	SL3.0ch02	48816157	48818157	+	165	1699	193	2552	8.852	7.031	-1.82097	0.0132273	-5.12548e-15	-3.91086	1	1
Solyc02g085290	SL3.0ch02	48874960	48876960	-	955	2647	663	2598	26.513	20.331	-6.18186	2.29364e-09	1.77834	2.33383	0.00357729	0.149652
Solyc02g085410	SL3.0ch02	48959442	48961442	+	599	1740	352	1659	25.609	17.504	-8.10551	1.55025e-10	-5.12548e-15	-3.87229	1	1
Solyc02g085450	SL3.0ch02	48983023	48985023	-	86	1854	158	4820	4.433	3.174	-1.25902	0.00749893	0.368852	1.93387	0.447334	1
Solyc02g085535	SL3.0ch02	49022316	49024316	-	866	4814	978	6302	15.246	13.434	-1.81241	0.00219302	-5.12548e-15	-3.86883	1	1
Solyc02g085560	SL3.0ch02	49022124	49024124	+	869	4955	1014	6729	14.921	13.096	-1.82532	0.00151884	0.297043	4.29054	0.454491	1
Solyc02g085655	SL3.0ch02	49121347	49123347	+	68	463	3	100	12.806	2.913	-9.89341	0.00119939	0.0633988	1.29156	0.909319	1
Solyc02g085710	SL3.0ch02	49159046	49161046	+	674	3499	721	4716	16.151	13.261	-2.89046	5.52161e-05	0.55799	2.38194	0.241283	1
Solyc02g085720	SL3.0ch02	49162484	49164484	+	96	799	3	200	10.726	1.478	-9.24842	2.2206e-06	-0.0764507	0.0479129	0.914043	1
Solyc02g085780	SL3.0ch02	49199954	49201954	-	3636	5706	5048	8349	38.921	37.68	-1.24092	0.0292295	0.192226	5.76981	0.476105	1
Solyc02g085790	SL3.0ch02	49200112	49202112	+	3620	5588	4986	8370	39.314	37.332	-1.9821	0.0017048	0.228624	6.57168	0.410528	1
Solyc02g085830	SL3.0ch02	49263135	49265135	-	91	2218	65	2209	3.941	2.858	-1.0827	0.0251876	-5.12548e-15	-3.91086	1	1
Solyc02g085850	SL3.0ch02	49271588	49273588	+	235	307	5378	10628	43.358	33.6	-9.75803	3.39524e-06	0.287714	1.18536	0.580945	1
Solyc02g085940	SL3.0ch02	49353695	49355695	-	132	1720	82	1511	7.127	5.148	-1.97991	0.0104762	-5.12548e-15	-3.91086	1	1
Solyc02g086010	SL3.0ch02	49440087	49442087	+	6994	8441	7724	9835	45.313	43.989	-1.32376	0.00882427	0.294262	-1.70731	0.857169	1
Solyc02g086050	SL3.0ch02	49479102	49481102	+	2830	4309	2927	4940	39.641	37.206	-2.43536	0.00141285	-0.184758	2.52877	0.68575	1
Solyc02g086170	SL3.0ch02	49560834	49562834	-	3238	10290	3251	11983	23.936	21.34	-2.59512	1.66172e-07	0.0850991	3.23493	0.829148	1
Solyc02g086180	SL3.0ch02	49561326	49563326	+	3471	10793	3312	11482	24.334	22.387	-1.94653	7.05127e-05	-5.10051	-1.13006	0.0172634	0.393105
Solyc02g086300	SL3.0ch02	49634492	49636492	-	4310	7185	4402	7786	37.495	36.117	-1.37707	0.0152149	-0.595346	7.86608	0.32639	1
Solyc02g086360	SL3.0ch02	49663563	49665563	-	4467	11756	4158	12311	27.535	25.247	-2.28755	2.63164e-06	0.0655089	2.0087	0.912257	1
Solyc02g086370	SL3.0ch02	49666519	49668519	+	7028	9658	6614	10544	42.119	38.548	-3.57153	3.24423e-11	-0.504416	3.2747	0.195212	1
Solyc02g086408	SL3.0ch02	49715662	49717662	-	98	580	193	1838	14.454	9.503	-4.95157	0.000308306	5.10778	-2.99723	0.00845762	0.258196
Solyc02g086460	SL3.0ch02	49759703	49761703	+	1021	5423	756	5214	15.844	12.663	-3.18088	4.33457e-07	-0.387674	6.55821	0.278856	1
Solyc02g086670	SL3.0ch02	49964742	49966742	-	135	3046	108	3873	4.244	2.713	-1.53106	0.000333749	0.425916	6.38129	0.14254	1
Solyc02g086800	SL3.0ch02	50049991	50051991	+	7466	11240	7414	12108	39.912	37.978	-1.93466	8.25698e-05	0.405023	4.09283	0.204954	1
Solyc02g086810	SL3.0ch02	50062091	50064091	+	3874	11021	4139	12372	26.009	25.068	-0.940591	0.0281218	0.00697828	3.64092	0.988828	1
Solyc02g086840	SL3.0ch02	50086030	50088030	-	4207	9049	4472	10055	31.737	30.784	-0.952515	0.0414653	-2.37391	-3.44027	0.553992	1
Solyc02g086940	SL3.0ch02	50161405	50163405	+	5781	8498	5683	8945	40.486	38.85	-1.63588	0.00274698	-0.310624	4.12921	0.328334	1
Solyc02g086960	SL3.0ch02	50168796	50170796	+	30	844	2	313	3.432	0.635	-2.79757	0.00414225	3.09553	-1.82141	0.14051	1
Solyc02g086980	SL3.0ch02	50181341	50183341	+	4448	8027	3069	7725	35.655	28.432	-7.22285	3.12709e-31	1.67741	0.955746	0.0208461	0.438861
Solyc02g087000	SL3.0ch02	50194534	50196534	+	3763	7549	3193	6728	33.266	32.184	-1.0813	0.0447223	-0.120912	4.56155	0.732282	1
Solyc02g087030	SL3.0ch02	50211693	50213693	+	795	7552	721	7686	9.524	8.576	-0.948194	0.0173239	0.278818	1.312	0.632332	1
Solyc02g087070	SL3.0ch02	50234631	50236631	+	6659	8059	7073	9175	45.244	43.532	-1.71241	0.00157496	-5.12548e-15	-0.875454	1	1
Solyc02g087170	SL3.0ch02	50283966	50285966	+	1884	4108	1753	4199	31.442	29.452	-1.98964	0.0103022	-0.364239	4.24248	0.284347	1
Solyc02g087180	SL3.0ch02	50294131	50296131	+	130	4130	35	1715	3.052	2	-1.05164	0.0126485	-0.0116393	3.35873	0.978658	1
Solyc02g087320	SL3.0ch02	50398103	50400103	-	163	1966	64	1514	7.656	4.056	-3.60041	3.95162e-06	-0.815175	-1.29826	0.406441	1
Solyc02g087315	SL3.0ch02	50399954	50401954	-	7100	7346	6876	8410	49.149	44.982	-4.16622	1.13685e-12	0.342176	0.757019	0.55414	1
Solyc02g087370	SL3.0ch02	50458432	50460432	-	114	2285	63	2093	4.752	2.922	-1.8299	0.00102773	1.88815	-3.59772	1	1
Solyc02g087450	SL3.0ch02	50530862	50532862	-	5408	11422	4249	10289	32.133	29.227	-2.90624	3.12592e-08	-0.196478	2.09911	0.758262	1
Solyc02g087480	SL3.0ch02	50549900	50551900	+	1030	10227	821	9498	9.15	7.956	-1.19367	0.00118261	-0.244843	6.4524	0.535328	1
Solyc02g087490	SL3.0ch02	50556843	50558843	-	273	2721	230	2861	9.118	7.441	-1.67728	0.00963175	3.11998	-3.42307	0.335924	1
Solyc02g087600	SL3.0ch02	50611574	50613574	+	129	2528	68	2072	4.855	3.178	-1.67753	0.00255641	0.573576	2.25019	0.293873	1
Solyc02g087760	SL3.0ch02	50699598	50701598	+	133	5899	102	5825	2.205	1.721	-0.483969	0.0317372	-0.0478734	6.31434	0.858464	1
Solyc02g087790	SL3.0ch02	50716658	50718658	+	49	1667	33	1784	2.855	1.816	-1.0393	0.0223915	-5.12548e-15	-3.75856	1	1
Solyc02g087840	SL3.0ch02	50737235	50739235	-	2662	8859	2184	8151	23.106	21.132	-1.97356	0.000319256	0.933516	5.74442	0.0268252	0.50415
Solyc02g087850	SL3.0ch02	50750677	50752677	+	1939	8624	1239	6982	18.357	15.071	-3.28537	3.04718e-09	-0.055348	5.9424	0.897448	1
Solyc02g087930	SL3.0ch02	50814505	50816505	-	8665	7089	9659	8391	55.002	53.512	-1.48944	0.00368115	-5.12548e-15	-3.91086	1	1
Solyc02g087935	SL3.0ch02	50816056	50818056	-	4215	2500	5406	3755	62.77	59.011	-3.75889	1.62614e-06	-5.12548e-15	-3.91086	1	1
Solyc02g087940	SL3.0ch02	50814610	50816610	+	8731	7340	9842	8971	54.328	52.315	-2.01278	0.00013361	-5.12548e-15	-3.91086	1	1
Solyc02g088010	SL3.0ch02	50881791	50883791	-	1678	8143	1474	7924	17.086	15.684	-1.40165	0.00519384	0.209294	4.62827	0.445443	1
Solyc02g088000	SL3.0ch02	50865868	50867868	+	3241	13681	2972	13470	19.153	18.076	-1.07692	0.00666059	0.0647629	5.1143	0.824948	1
Solyc02g088110	SL3.0ch02	50936152	50938152	-	271	2563	144	1723	9.562	7.713	-1.84955	0.0162731	0.290294	4.51588	0.345222	1
Solyc02g088190	SL3.0ch02	50988062	50990062	+	3309	10978	2868	10562	23.161	21.355	-1.80574	0.000220403	-1.16443	1.16969	0.150447	1
Solyc02g088290	SL3.0ch02	51073449	51075449	-	155	4942	60	3061	3.041	1.922	-1.11854	0.0013585	-5.12548e-15	-3.82959	1	1
Solyc02g088390	SL3.0ch02	51125123	51127123	-	1377	7158	977	5700	16.134	14.632	-1.50125	0.00644883	0.651053	5.75113	0.125488	0.981391
Solyc02g088400	SL3.0ch02	51128670	51130670	-	791	6395	771	6986	11.008	9.939	-1.06811	0.0178606	0.925996	0.525322	0.0865396	0.850002
Solyc02g088427	SL3.0ch02	51175481	51177481	+	1246	2589	1023	2629	32.49	28.012	-4.47817	2.17781e-05	-0.0564094	1.18897	0.908791	1
Solyc02g088460	SL3.0ch02	51185432	51187432	-	497	6545	397	6745	7.058	5.559	-1.49899	0.000180487	-0.284137	4.52894	0.517452	1
Solyc02g088560	SL3.0ch02	51249599	51251599	-	2835	10286	2770	11519	21.607	19.386	-2.22104	4.96648e-06	-1.22254	4.8642	0.0023782	0.113999
Solyc02g088620	SL3.0ch02	51292469	51294469	-	2389	6152	1901	5306	27.971	26.377	-1.59383	0.0137224	0.448993	6.29658	0.128782	0.990953
Solyc02g088780	SL3.0ch02	51388690	51390690	-	5503	8452	6891	11316	39.434	37.848	-1.58581	0.00235928	0.101708	6.51543	0.694802	1
Solyc02g088790	SL3.0ch02	51405258	51407258	-	38	815	5	408	4.455	1.211	-3.24421	0.0015396	0.707588	5.61184	0.0554066	0.712455
Solyc02g088930	SL3.0ch02	51486624	51488624	+	7967	10302	9258	12385	43.609	42.776	-0.833438	0.0444737	0.588283	6.10387	0.0685756	0.779165
Solyc02g088958	SL3.0ch02	51526688	51528688	+	134	1723	57	1103	7.216	4.914	-2.30215	0.00635651	0.0261878	0.530313	0.981558	1
Solyc02g088980	SL3.0ch02	51535908	51537908	+	178	1933	94	1412	8.432	6.242	-2.19032	0.00829075	0.743729	-0.950158	0.554573	1
Solyc02g089010	SL3.0ch02	51546666	51548666	+	358	4191	325	4372	7.87	6.919	-0.950551	0.0414719	-0.0755427	3.23727	0.866912	1
Solyc02g089040	SL3.0ch02	51570229	51572229	+	3127	11626	2862	12085	21.196	19.148	-2.04803	9.47486e-06	-2.01348	-0.845553	0.135978	1
Solyc02g089120	SL3.0ch02	51645468	51647468	+	36	917	8	549	3.778	1.436	-2.34128	0.00589446	0.0792326	4.4619	0.837474	1
Solyc02g089130	SL3.0ch02	51651059	51653059	-	2931	5323	3004	6433	35.51	31.832	-3.67791	2.61795e-07	0.329962	2.23909	0.505513	1
Solyc02g089150	SL3.0ch02	51656942	51658942	+	3984	7881	3686	7846	33.578	31.963	-1.61452	0.00509282	3.43017	4.1823	8.37401e-13	7.13147e-10
Solyc02g089210	SL3.0ch02	51724177	51726177	+	4298	10130	3943	10169	29.789	27.941	-1.84854	0.000408798	0.345956	0.403718	0.613943	1
Solyc02g089270	SL3.0ch02	51788987	51790987	-	3542	9481	2622	7925	27.198	24.86	-2.33788	3.99673e-05	-5.12548e-15	-3.91086	1	1
Solyc02g089295	SL3.0ch02	51798660	51800660	-	7319	9868	7512	10919	42.585	40.757	-1.82709	0.000344244	-5.12548e-15	-3.91086	1	1
Solyc02g089300	SL3.0ch02	51802589	51804589	-	9457	8609	10692	10353	52.347	50.805	-1.54153	0.00152515	-5.12548e-15	-3.91086	1	1
Solyc02g089340	SL3.0ch02	51822230	51824230	+	57	1567	2	226	3.51	0.877	-2.63266	0.0207459	-0.120493	3.7662	0.740474	1
Solyc02g089420	SL3.0ch02	51892382	51894382	+	72	1844	6	729	3.758	0.816	-2.9415	1.2585e-05	-1.12273	-0.248574	0.286084	1
Solyc02g089470	SL3.0ch02	51924313	51926313	-	3572	11967	3548	12810	22.987	21.69	-1.29763	0.00332876	-0.0191451	1.55016	0.974684	1
Solyc02g089510	SL3.0ch02	51950172	51952172	+	277	2306	226	2294	10.724	8.968	-1.75571	0.0198428	0.602494	-2.29742	0.735022	1
Solyc02g089630	SL3.0ch02	52019762	52021762	-	1707	8394	1504	8027	16.899	15.78	-1.11923	0.018262	0.225194	9.0696	0.660939	1
Solyc02g089690	SL3.0ch02	52073973	52075973	+	54	1905	1	318	2.757	0.313	-2.44303	0.00287938	0.160878	2.14173	0.794751	1
Solyc02g089740	SL3.0ch02	52105271	52107271	+	2169	10238	2283	11678	17.482	16.353	-1.12937	0.0082002	0.396377	-0.992997	0.723893	1
Solyc02g089860	SL3.0ch02	52200211	52202211	-	2360	8834	2373	9982	21.083	19.207	-1.87592	0.000243475	-0.547801	-0.677355	0.657921	1
Solyc02g089870	SL3.0ch02	52200144	52202144	+	2339	8928	2368	9671	20.76	19.669	-1.09033	0.0203161	0.463785	4.90539	0.124093	0.976251
Solyc02g089890	SL3.0ch02	52220494	52222494	-	1027	7190	750	6222	12.498	10.757	-1.74116	0.000608552	0.180769	2.54378	0.683145	1
Solyc02g089920	SL3.0ch02	52223359	52225359	+	65	1314	4	385	4.714	1.028	-3.68528	0.00022273	-1.35564	-3.08204	0.556341	1
Solyc02g090080	SL3.0ch02	52357200	52359200	-	8	256	4	543	3.03	0.731	-2.29904	0.0127788	-5.12548e-15	-3.91086	1	1
Solyc02g090120	SL3.0ch02	52382018	52384018	-	38	1394	3	341	2.654	0.872	-1.78154	0.0233523	1.20116	3.72162	0.0830241	0.839532
Solyc02g090395	SL3.0ch02	52584845	52586845	+	250	7216	167	6254	3.349	2.601	-0.747672	0.00619291	-5.12548e-15	-3.91086	1	1
Solyc02g090440	SL3.0ch02	52631724	52633724	+	223	2351	92	1251	8.664	6.85	-1.81322	0.0240707	-0.414327	0.960042	0.495522	1
Solyc02g090450	SL3.0ch02	52633416	52635416	+	1527	5642	1271	5646	21.3	18.375	-2.92502	1.15226e-05	-0.319358	0.881592	0.649573	1
Solyc02g090505	SL3.0ch02	52675925	52677925	+	501	4481	288	3168	10.056	8.333	-1.72287	0.004516	-1.22499	-1.7165	0.310382	1
Solyc02g090520	SL3.0ch02	52699708	52701708	-	30	545	0	127	5.217	0	-5.21739	0.00192672	-5.12548e-15	-3.5743	1	1
Solyc02g090690	SL3.0ch02	52865621	52867621	-	749	7639	497	6753	8.929	6.855	-2.07425	1.71528e-06	-0.927871	-0.162299	0.381748	1
Solyc02g090790	SL3.0ch02	52931317	52933317	-	4262	8772	3480	9134	32.699	27.588	-5.1107	1.29846e-18	-1.44149	-3.19468	0.421955	1
Solyc02g090810	SL3.0ch02	52937846	52939846	-	988	5404	839	6355	15.457	11.662	-3.79432	1.50717e-10	0.518129	4.64587	0.0976517	0.893167
Solyc02g090830	SL3.0ch02	52946971	52948971	+	1014	6990	894	7314	12.669	10.892	-1.77685	0.00034177	0.731803	-3.48879	1	1
Solyc02g090890	SL3.0ch02	53012686	53014686	-	1435	8539	1042	7245	14.387	12.574	-1.8135	0.000263374	-0.817565	5.29919	0.0611823	0.743199
Solyc02g090930	SL3.0ch02	53040250	53042250	-	437	2996	335	2847	12.729	10.528	-2.20142	0.00343084	0.712827	4.25818	0.278469	1
Solyc02g091020	SL3.0ch02	53093915	53095915	-	238	5686	136	4509	4.018	2.928	-1.08968	0.00182831	0.991042	1.6081	0.178744	1
Solyc02g091140	SL3.0ch02	53186883	53188883	-	5375	10448	5150	10918	33.97	32.051	-1.91826	0.000203357	-0.16556	3.14472	0.768155	1
Solyc02g091280	SL3.0ch02	53263872	53265872	-	267	7532	176	5967	3.424	2.865	-0.558466	0.0316353	-0.253016	6.89043	0.360713	1
Solyc02g091290	SL3.0ch02	53262359	53264359	+	1068	10521	189	8070	9.216	2.288	-6.92722	4.5804e-96	-0.84388	2.66472	0.0575523	0.723783
Solyc02g091330	SL3.0ch02	53299690	53301690	-	108	724	0	20	12.981	0	-12.9808	0.0450919	0.227592	5.49301	0.477769	1
Solyc02g091390	SL3.0ch02	53326575	53328575	-	49	1085	6	438	4.321	1.351	-2.96964	0.00202537	-0.5471	4.56907	0.401411	1
Solyc02g091570	SL3.0ch02	53469537	53471537	-	558	5877	419	6755	8.671	5.841	-2.83079	2.61696e-10	2.93066	-3.3734	0.115024	0.946873
Solyc02g091580	SL3.0ch02	53480833	53482833	-	7188	6600	8081	7991	52.132	50.28	-1.8523	0.000956889	-0.198404	6.60615	0.468764	1
Solyc02g091660	SL3.0ch02	53543594	53545594	-	108	2827	49	2079	3.68	2.303	-1.3771	0.00309592	0.346055	3.74863	0.349423	1
Solyc02g091700	SL3.0ch02	53576603	53578603	-	383	4950	240	4715	7.182	4.844	-2.33811	6.44374e-07	0.533766	6.43651	0.173574	1
Solyc02g091750	SL3.0ch02	53612960	53614960	+	93	1227	7	223	7.045	3.043	-4.00198	0.0106621	-0.41168	3.25383	0.513282	1
Solyc02g091790	SL3.0ch02	53642172	53644172	+	149	3169	42	1544	4.491	2.648	-1.84249	0.00100983	0.00910203	4.81799	0.97609	1
Solyc02g091880	SL3.0ch02	53745890	53747890	+	96	1688	49	1689	5.381	2.819	-2.56183	9.52654e-05	0.483599	6.7099	0.131062	0.99938
Solyc02g091940	SL3.0ch02	53801146	53803146	-	564	2359	24	154	19.295	13.483	-5.8121	0.0299657	0.114931	0.488313	0.846156	1
Solyc02g091950	SL3.0ch02	53797985	53799985	+	57	2146	34	2086	2.587	1.604	-0.983607	0.0137604	-0.306875	3.60705	0.456886	1
Solyc02g091960	SL3.0ch02	53806448	53808448	+	837	5984	624	5717	12.271	9.841	-2.43021	8.61812e-06	-0.112209	6.02946	0.699452	1
Solyc02g091990	SL3.0ch02	53847973	53849973	-	162	3845	73	2219	4.043	3.185	-0.857934	0.0403518	-0.577189	2.25261	0.634056	1
Solyc02g092030	SL3.0ch02	53874727	53876727	+	64	846	0	40	7.033	0	-7.03297	0.0485511	3.58185	-3.76162	0.441359	1
Solyc02g092190	SL3.0ch02	53992432	53994432	+	1206	8800	997	9902	12.053	9.148	-2.90514	1.42658e-11	-4.92141	-3.13472	0.0537766	0.703283
Solyc02g092300	SL3.0ch02	54056373	54058373	-	217	1509	90	1008	12.572	8.197	-4.3757	0.000179969	0.705722	3.4757	0.0587162	0.729401
Solyc02g092310	SL3.0ch02	54062683	54064683	-	75	2537	68	3072	2.871	2.166	-0.705758	0.0424406	-0.532	3.63406	0.152319	1
Solyc02g092350	SL3.0ch02	54077149	54079149	+	5773	7817	6686	9561	42.48	41.152	-1.32755	0.011253	1.1529	-0.152335	0.20788	1
Solyc02g092517	SL3.0ch02	54223589	54225589	+	217	1724	204	2252	11.18	8.306	-2.87362	0.000898535	-0.232609	-0.531156	0.746426	1
Solyc02g092520	SL3.0ch02	54224956	54226956	+	125	1129	93	1094	9.968	7.835	-2.13322	0.0319615	-0.153826	-2.02685	0.932258	1
Solyc02g092527	SL3.0ch02	54228779	54230779	+	38	448	28	742	7.819	3.636	-4.18257	0.00108548	-0.257385	0.185559	0.698231	1
Solyc02g092620	SL3.0ch02	54292097	54294097	-	52	673	20	443	7.172	4.32	-2.85276	0.0234413	-0.147673	4.7248	0.784997	1
Solyc02g092650	SL3.0ch02	54306115	54308115	-	4282	4847	3785	5896	46.905	39.097	-7.80827	1.36203e-26	0.190423	3.48998	0.71079	1
Solyc02g092730	SL3.0ch02	54353075	54355075	-	1318	4364	1056	4234	23.196	19.962	-3.23386	3.22486e-05	0.137646	2.33375	0.738262	1
Solyc02g092740	SL3.0ch02	54353283	54355283	-	1318	4344	1056	4234	23.278	19.962	-3.3158	2.1842e-05	0.238422	-0.505091	0.797127	1
Solyc02g092750	SL3.0ch02	54352117	54354117	+	1371	4795	1113	4245	22.235	20.773	-1.46216	0.029326	0.0897646	5.40427	0.867637	1
Solyc02g092820	SL3.0ch02	54432165	54434165	-	422	4592	199	2785	8.416	6.669	-1.74753	0.00297668	-3.15558	-0.565229	0.0408985	0.619593
Solyc02g092910	SL3.0ch02	54491126	54493126	+	8894	10146	8845	10518	46.712	45.68	-1.03228	0.0217177	0.295402	4.61542	0.301046	1
Solyc02g092960	SL3.0ch02	54555169	54557169	+	18	1080	3	566	1.639	0.527	-1.1121	0.0311259	-1.93383	-3.87151	1	1
Solyc02g092980	SL3.0ch02	54571685	54573685	-	3715	9765	3529	10044	27.559	26	-1.5592	0.00240281	-0.120301	3.59438	0.800126	1
Solyc02g093050	SL3.0ch02	54632843	54634843	+	145	4925	93	5094	2.86	1.793	-1.06702	0.000268399	0.471894	4.82729	0.576592	1
Solyc02g093080	SL3.0ch02	54655639	54657639	-	1042	2275	955	2288	31.414	29.448	-1.96589	0.040926	0.169377	6.63265	0.50914	1
Solyc02g093150	SL3.0ch02	54713051	54715051	+	338	9858	317	11222	3.315	2.747	-0.56782	0.00844468	0.110377	4.64229	0.730513	1
Solyc02g093365	SL3.0ch02	54892882	54894882	+	96	1478	16	835	6.099	1.88	-4.21897	7.26656e-07	-5.12548e-15	-3.91086	1	1
Solyc02g093420	SL3.0ch02	54934663	54936663	+	71	1102	6	1128	6.053	0.529	-5.52376	4.65883e-15	0.00894543	-1.32744	1	1
Solyc02g093710	SL3.0ch02	55097784	55099784	+	5405	5461	4574	5276	49.742	46.437	-3.30577	1.93085e-06	0.771962	4.40219	0.124346	0.976648
Solyc02g093760	SL3.0ch02	55123953	55125953	-	99	1310	58	1249	7.026	4.438	-2.58862	0.00240645	0.0300081	-1.35091	1	1
Solyc02g093770	SL3.0ch02	55137445	55139445	-	6075	6325	6178	7220	48.992	46.111	-2.88058	3.54997e-06	-0.0504514	5.69723	0.867128	1
Solyc02g093830	SL3.0ch02	55171063	55173063	+	561	4751	502	4857	10.561	9.367	-1.19357	0.0212491	0.351099	7.61474	0.213429	1
Solyc02g093860	SL3.0ch02	55196447	55198447	+	1906	10208	1524	9117	15.734	14.322	-1.4119	0.0018528	0.875297	3.44025	0.553332	1
Solyc02g093890	SL3.0ch02	55234173	55236173	-	193	4427	49	2128	4.177	2.251	-1.92669	3.45049e-05	4.34093	-0.657906	0.0282731	0.517274
Solyc02g093900	SL3.0ch02	55242895	55244895	-	70	1817	56	2125	3.71	2.568	-1.14196	0.0191093	0.24718	8.00295	0.321091	1
Solyc02g093935	SL3.0ch02	55257938	55259938	-	8446	8474	9433	10158	49.917	48.15	-1.7676	0.000531084	-0.412	1.31256	0.62714	1
Solyc02g094010	SL3.0ch02	55305978	55307978	-	3685	6476	3534	6836	36.266	34.079	-2.18704	0.000706656	0.198153	3.72805	0.806721	1
Solyc02g094080	SL3.0ch02	55345776	55347776	-	1075	10258	943	9720	9.486	8.844	-0.641908	0.0477014	-5.12548e-15	-3.12349	1	1
Solyc02g094310	SL3.0ch02	55510392	55512392	+	55	628	9	388	8.053	2.267	-5.78571	3.82824e-05	-0.26989	1.60561	0.636721	1
Solyc02g094460	SL3.0ch02	55610025	55612025	+	3625	8045	3631	8741	31.063	29.349	-1.71402	0.00241654	-2.26736	-2.0896	0.0450082	0.649826
Solyc02g094580	SL3.0ch02	55758992	55760992	-	8031	9620	7248	10019	45.499	41.976	-3.52281	5.12251e-11	-1.03978	0.659291	0.0516422	0.69213
Solyc02g094590	SL3.0ch02	55761407	55763407	+	4220	6081	3764	6377	40.967	37.117	-3.85024	2.03093e-08	-0.370451	3.9341	0.279712	1
Solyc02g094635	SL3.0ch02	55860700	55862700	+	8265	9752	8728	12086	45.873	41.933	-3.94003	1.26345e-14	-2.52546	-2.64976	0.0260133	0.495707
Solyc10g036690	SL3.0ch02	55884841	55886841	+	2166	5974	2092	6124	26.609	25.463	-1.14682	0.0458505	-5.12548e-15	-3.91086	1	1
Solyc03g005060	SL3.0ch03	51640	53640	-	343	5622	295	5524	5.75	5.07	-0.68061	0.0484233	-0.764256	0.865333	0.162418	1
Solyc03g005120	SL3.0ch03	81266	83266	-	6625	11593	6496	11898	36.365	35.316	-1.04927	0.0187482	-0.504034	5.59847	0.0985849	0.894876
Solyc03g005200	SL3.0ch03	120032	122032	-	1077	5659	1171	6928	15.989	14.459	-1.53014	0.00571611	-5.12548e-15	-3.91086	1	1
Solyc03g005210	SL3.0ch03	120224	122224	+	1325	6033	1498	7670	18.008	16.339	-1.66817	0.00282735	-5.12548e-15	-3.34443	1	1
Solyc03g005340	SL3.0ch03	204089	206089	-	968	3957	719	4121	19.655	14.855	-4.79945	4.82711e-10	0.0423244	5.58844	0.882116	1
Solyc03g005350	SL3.0ch03	202653	204653	+	1086	6256	928	6621	14.792	12.293	-2.49859	7.98361e-06	0.471619	4.31326	0.127476	0.98797
Solyc03g005470	SL3.0ch03	363957	365957	+	3388	9890	3165	10915	25.516	22.479	-3.0372	5.38994e-09	0.332379	6.87399	0.447464	1
Solyc03g005650	SL3.0ch03	467978	469978	-	7555	11855	7136	12274	38.923	36.765	-2.15868	1.04395e-05	-5.12548e-15	-3.66258	1	1
Solyc03g005660	SL3.0ch03	467597	469597	+	7388	10459	6956	10230	41.396	40.475	-0.921508	0.0384876	0.0767876	3.89654	0.808112	1
Solyc03g005690	SL3.0ch03	490529	492529	+	3306	7800	3795	9861	29.768	27.79	-1.97771	0.000433488	0.264242	4.80981	0.356063	1
Solyc03g005710	SL3.0ch03	504437	506437	-	278	2888	152	2969	8.781	4.87	-3.91056	1.11862e-09	-5.12548e-15	-3.91086	1	1
Solyc03g005720	SL3.0ch03	504848	506848	+	253	4038	197	4376	5.896	4.308	-1.58817	0.0004741	-5.12548e-15	-3.91086	1	1
Solyc03g005775	SL3.0ch03	542523	544523	+	633	882	953	1770	41.782	34.998	-6.78401	1.20917e-05	-5.12548e-15	-3.91086	1	1
Solyc03g005800	SL3.0ch03	546095	548095	+	5472	5688	6648	7261	49.032	47.796	-1.23587	0.0258577	0.0988017	4.02858	0.761586	1
Solyc03g005820	SL3.0ch03	558030	560030	-	3016	9227	2720	10109	24.634	21.202	-3.43252	1.53444e-10	1.3286	-0.573193	0.26117	1
Solyc03g005910	SL3.0ch03	612426	614426	+	3358	9097	2317	7599	26.961	23.366	-3.59478	1.06798e-09	-5.12548e-15	-3.63426	1	1
Solyc03g005990	SL3.0ch03	672405	674405	-	4978	7923	4384	8304	38.586	34.552	-4.03382	3.17321e-11	-0.446901	3.92823	0.243427	1
Solyc03g006000	SL3.0ch03	673897	675897	+	4544	6944	5180	8320	39.554	38.37	-1.18395	0.0283935	-0.230329	5.35006	0.43689	1
Solyc03g006020	SL3.0ch03	691993	693993	-	7824	9352	7972	10764	45.552	42.549	-3.00283	1.2259e-08	-0.0496692	3.39748	0.902961	1
Solyc03g006040	SL3.0ch03	724666	726666	+	4251	9898	3994	10493	30.045	27.57	-2.47498	3.4855e-06	-5.12548e-15	-3.91086	1	1
Solyc03g006050	SL3.0ch03	741367	743367	+	3997	11372	3782	11831	26.007	24.223	-1.78349	0.00021554	-0.487891	1.88679	0.503497	1
Solyc03g006110	SL3.0ch03	777112	779112	-	3398	9756	3598	10935	25.832	24.757	-1.075	0.0206615	-3.71332	-0.203654	0.000688272	0.0467137
Solyc03g006130	SL3.0ch03	790306	792306	-	4580	8872	4546	10151	34.047	30.931	-3.1155	2.89279e-08	-0.0615977	5.95404	0.86521	1
Solyc03g006160	SL3.0ch03	816025	818025	+	966	9944	869	10157	8.854	7.881	-0.972891	0.0055653	-5.12548e-15	-3.87428	1	1
Solyc03g006260	SL3.0ch03	885678	887678	-	5886	10390	5041	10648	36.164	32.131	-4.03288	5.69437e-14	-0.453569	0.922579	0.605244	1
Solyc03g006300	SL3.0ch03	904078	906078	-	4764	10124	4524	11056	31.999	29.037	-2.9617	2.4304e-08	-0.541438	-1.00426	0.558559	1
Solyc03g006350	SL3.0ch03	941475	943475	+	80	959	5	324	7.7	1.52	-6.17995	8.50109e-06	0.248968	4.1079	0.433755	1
Solyc03g006620	SL3.0ch03	1195390	1197390	+	3330	12048	2965	13629	21.654	17.868	-3.78641	4.80924e-17	0.681234	5.34721	0.19879	1
Solyc03g006670	SL3.0ch03	1247830	1249830	+	3046	10184	3247	11410	23.023	22.153	-0.870194	0.0395308	-0.0342455	1.05773	0.971376	1
Solyc03g006690	SL3.0ch03	1259013	1261013	-	2196	5115	1703	5092	30.037	25.063	-4.97438	6.13134e-11	-1.24914	-3.52184	0.743866	1
Solyc03g006870	SL3.0ch03	1380835	1382835	+	3214	9223	2808	9102	25.842	23.577	-2.26542	3.51571e-05	-0.827997	3.86921	0.0326082	0.552073
Solyc03g006905	SL3.0ch03	1470202	1472202	-	6619	10388	6796	11172	38.919	37.823	-1.09647	0.0183852	-5.12548e-15	-3.91086	1	1
Solyc03g007010	SL3.0ch03	1560292	1562292	-	4675	7882	4739	9109	37.23	34.222	-3.00868	3.57571e-07	-0.0294661	2.78037	0.941366	1
Solyc03g007030	SL3.0ch03	1573515	1575515	-	6450	9059	6534	9965	41.589	39.602	-1.98635	0.000220159	-1.34296	0.714253	0.0880593	0.858646
Solyc03g007050	SL3.0ch03	1611104	1613104	+	4355	10734	4410	11507	28.862	27.706	-1.15586	0.0127578	1.05662	-1.66603	0.638248	1
Solyc03g007080	SL3.0ch03	1639532	1641532	-	3252	8685	3204	9158	27.243	25.918	-1.32489	0.0108705	-3.05716	-3.62666	0.529166	1
Solyc03g007120	SL3.0ch03	1710842	1712842	+	5351	12381	5410	13497	30.177	28.614	-1.56334	0.000688607	0.300126	5.54545	0.274718	1
Solyc03g007270	SL3.0ch03	1827217	1829217	+	9750	11359	9432	11631	46.189	44.78	-1.40888	0.00226035	0.016561	6.65009	0.95142	1
Solyc03g007280	SL3.0ch03	1842699	1844699	+	66	1045	18	498	5.941	3.488	-2.45222	0.0206694	0.140698	3.95326	0.64835	1
Solyc03g007330	SL3.0ch03	1889183	1891183	+	106	2082	53	1514	4.845	3.382	-1.46235	0.0168425	-0.975228	4.80713	0.00194524	0.0985515
Solyc03g007360	SL3.0ch03	1912328	1914328	-	763	4699	648	4973	13.969	11.528	-2.44104	9.02686e-05	-1.25567	1.79611	0.111263	0.936667
Solyc03g007350	SL3.0ch03	1905175	1907175	+	5935	7849	6393	8792	43.057	42.101	-0.95641	0.0471796	-5.12548e-15	-3.91086	1	1
Solyc03g007395	SL3.0ch03	1934374	1936374	+	171	2113	13	435	7.487	2.902	-4.58508	0.000133109	-0.0154721	1.44146	0.981405	1
Solyc03g007470	SL3.0ch03	2047569	2049569	-	5971	10643	6116	11381	35.94	34.955	-0.985005	0.0289552	0.763865	7.9692	0.0308714	0.540615
Solyc03g007650	SL3.0ch03	2190292	2192292	-	3811	2324	4697	3555	62.119	56.92	-5.19945	4.67259e-10	0.361933	4.21703	0.26646	1
Solyc03g007770	SL3.0ch03	2315034	2317034	+	1224	7979	1075	8744	13.3	10.948	-2.35185	6.77593e-07	0.341501	6.45849	0.406705	1
Solyc03g007820	SL3.0ch03	2375470	2377470	+	10838	10129	10335	10827	51.691	48.838	-2.85321	5.77955e-09	0.0698746	-1.03282	0.95134	1
Solyc03g007960	SL3.0ch03	2445877	2447877	+	932	12951	840	13980	6.713	5.668	-1.04523	0.000185283	-0.083681	5.03362	0.838785	1
Solyc03g025100	SL3.0ch03	2601801	2603801	-	270	821	141	638	24.748	18.1	-6.64781	0.000457749	-5.16567	-3.31471	0.0437691	0.643623
Solyc03g025200	SL3.0ch03	2691681	2693681	+	1787	7076	1464	7396	20.162	16.524	-3.63877	5.39773e-10	0.243604	3.78707	0.59776	1
Solyc03g025270	SL3.0ch03	2733579	2735579	-	4738	6282	5530	7825	42.995	41.408	-1.58684	0.00717283	0.413397	6.66601	0.296425	1
Solyc03g025280	SL3.0ch03	2739026	2741026	+	3653	6268	2861	6148	36.821	31.757	-5.06375	4.22759e-13	-0.15646	5.5674	0.581621	1
Solyc03g025360	SL3.0ch03	2816524	2818524	+	4045	11844	4188	13104	25.458	24.219	-1.23857	0.00524109	0.0809701	5.51412	0.763106	1
Solyc03g025410	SL3.0ch03	2859634	2861634	-	5558	8170	4603	8284	40.487	35.718	-4.76843	2.49499e-15	-2.17722	2.399	0.00237964	0.113999
Solyc03g025390	SL3.0ch03	2846169	2848169	-	2637	8104	2810	9366	24.551	23.078	-1.4726	0.0051819	0.300449	3.14241	0.430992	1
Solyc03g025420	SL3.0ch03	2864573	2866573	+	5690	9137	5594	9623	38.376	36.762	-1.61442	0.00240454	0.215391	5.04633	0.428688	1
Solyc03g025460	SL3.0ch03	2898298	2900298	+	5060	9581	4217	9028	34.56	31.838	-2.72205	1.43355e-06	-5.12548e-15	-3.86689	1	1
Solyc03g025600	SL3.0ch03	3019910	3021910	+	1396	2577	859	2890	35.137	22.913	-12.2244	1.29593e-31	-0.881707	5.67794	0.00182532	0.095768
Solyc03g025640	SL3.0ch03	3066682	3068682	-	2281	12537	2285	13520	15.393	14.457	-0.93599	0.0116677	-0.30516	-0.726475	0.821049	1
Solyc03g025670	SL3.0ch03	3134384	3136384	+	4834	10990	4254	10768	30.549	28.318	-2.23007	1.52979e-05	1.01623	3.18638	0.490431	1
Solyc03g025790	SL3.0ch03	3204301	3206301	+	6284	11170	5393	10060	36.003	34.899	-1.10384	0.0193801	-5.12548e-15	-3.91086	1	1
Solyc03g025810	SL3.0ch03	3235734	3237734	-	352	3157	205	2187	10.031	8.57	-1.46111	0.0309297	-2.19678	-2.64221	0.0813931	0.8325
Solyc03g025870	SL3.0ch03	3285457	3287457	-	760	10533	483	9155	6.73	5.011	-1.71842	1.54031e-07	1.78027	-1.0728	0.0502238	0.680562
Solyc03g025933	SL3.0ch03	3386637	3388637	+	3096	5512	2176	5531	35.967	28.234	-7.73247	1.9663e-25	-5.12548e-15	-3.91086	1	1
Solyc03g025960	SL3.0ch03	3411580	3413580	+	177	388	10	50	31.327	16.667	-14.6608	0.0096544	-0.131969	1.40334	0.911272	1
Solyc03g026090	SL3.0ch03	3533782	3535782	+	26	978	12	925	2.59	1.281	-1.30896	0.0241708	0.203164	1.65794	0.68734	1
Solyc03g026120	SL3.0ch03	3558951	3560951	-	5065	9185	2930	6864	35.544	29.916	-5.62758	2.19121e-19	-0.383984	-1.55224	0.700819	1
Solyc03g026290	SL3.0ch03	3754223	3756223	-	6111	12162	5297	12678	33.443	29.469	-3.97408	8.22005e-16	0.288529	4.42244	0.320926	1
Solyc03g031490	SL3.0ch03	4041431	4043431	-	5905	6943	6496	9048	45.96	41.791	-4.16942	3.03682e-12	-5.12548e-15	-3.91086	1	1
Solyc03g031550	SL3.0ch03	4074672	4076672	-	5152	7394	4065	6346	41.065	39.045	-2.01964	0.00125442	-5.12548e-15	-3.71491	1	1
Solyc03g031610	SL3.0ch03	4121413	4123413	-	349	1340	66	448	20.663	12.84	-7.82265	3.79706e-05	-5.12548e-15	-3.74492	1	1
Solyc03g031655	SL3.0ch03	4133570	4135570	+	3309	10636	2750	9535	23.729	22.385	-1.34391	0.00581736	4.93541	-3.50864	0.0643094	0.759684
Solyc03g031660	SL3.0ch03	4140324	4142324	-	5488	9365	5171	9367	36.949	35.569	-1.37991	0.00791218	0.792696	-3.56528	1	1
Solyc03g031670	SL3.0ch03	4151112	4153112	-	5398	7983	4908	8854	40.341	35.663	-4.67736	4.4099e-15	0.256285	5.76417	0.338707	1
Solyc03g031810	SL3.0ch03	4315749	4317749	-	2038	2633	2011	4056	43.631	33.147	-10.4844	6.16502e-28	-5.12548e-15	-3.91086	1	1
Solyc03g031980	SL3.0ch03	4497034	4499034	-	2314	10537	1822	10077	18.006	15.312	-2.69417	1.583e-08	0.690427	-0.0858635	0.551573	1
Solyc03g032170	SL3.0ch03	4698864	4700864	+	8139	11571	8172	12280	41.294	39.957	-1.33679	0.00380667	-1.53455	-1.39104	0.198954	1
Solyc03g032180	SL3.0ch03	4702962	4704962	+	129	1496	25	456	7.938	5.198	-2.74096	0.023153	-0.330699	3.60051	0.325167	1
Solyc03g032210	SL3.0ch03	4738920	4740920	+	3469	8492	3655	9693	29.003	27.382	-1.62021	0.00260601	-1.49975	1.86342	0.0146965	0.354947
Solyc03g033270	SL3.0ch03	4866839	4868839	+	71	1756	21	1980	3.886	1.049	-2.83668	9.786e-09	0.0431331	0.978542	0.948485	1
Solyc03g033350	SL3.0ch03	4950707	4952707	+	3668	5438	4630	7801	40.281	37.246	-3.03554	5.82331e-06	0.235624	0.453277	0.759924	1
Solyc03g033520	SL3.0ch03	5087991	5089991	+	5049	8586	4828	8616	37.03	35.912	-1.11777	0.0280624	0.603489	1.9855	0.202027	1
Solyc03g033530	SL3.0ch03	5096910	5098910	-	152	2269	52	1509	6.278	3.331	-2.9472	2.7175e-05	-0.16245	1.05225	0.812081	1
Solyc03g033600	SL3.0ch03	5188182	5190182	-	3863	12490	3266	11334	23.623	22.37	-1.25271	0.00521569	0.372372	5.02939	0.23387	1
Solyc03g033620	SL3.0ch03	5223920	5225920	+	789	2614	700	2684	23.185	20.686	-2.49985	0.00764446	0.231795	5.68962	0.365119	1
Solyc03g033813	SL3.0ch03	5449500	5451500	-	1845	5577	1705	6063	24.859	21.949	-2.90951	2.01889e-05	1.8493	-3.55933	1	1
Solyc03g033815	SL3.0ch03	5449971	5451971	-	3338	7176	2630	6889	31.748	27.629	-4.11919	2.79602e-10	1.35774	-2.39311	0.506308	1
Solyc03g033817	SL3.0ch03	5451028	5453028	-	4100	8012	3160	6814	33.851	31.682	-2.16835	0.000444848	-5.12548e-15	-3.83515	1	1
Solyc03g033835	SL3.0ch03	5465397	5467397	+	151	2898	44	1912	4.952	2.249	-2.70295	8.73622e-07	-0.636183	-1.79248	0.862171	1
Solyc03g034000	SL3.0ch03	5737119	5739119	-	8903	11429	8455	11447	43.788	42.483	-1.30495	0.00483826	-2.90339	-1.08401	0.0137816	0.342611
Solyc03g034060	SL3.0ch03	5801905	5803905	-	2482	5874	585	6411	29.703	8.362	-21.3413	5.02959e-253	-4.20772	-3.11978	0.188535	1
Solyc03g034250	SL3.0ch03	5976870	5978870	-	3009	7728	3318	9078	28.025	26.767	-1.25789	0.0172554	-0.106952	4.72737	0.819224	1
Solyc03g034260	SL3.0ch03	5990295	5992295	+	3373	9935	2751	8756	25.346	23.907	-1.43847	0.0051676	-5.12548e-15	-3.67861	1	1
Solyc03g034370	SL3.0ch03	6226722	6228722	+	3946	8508	4169	9916	31.685	29.599	-2.08574	0.000176714	1.36204	2.95933	0.165562	1
Solyc03g034395	SL3.0ch03	6330680	6332680	-	4327	4786	3391	4337	47.482	43.879	-3.60222	2.76091e-06	0.244524	0.768499	0.702639	1
Solyc03g034413	SL3.0ch03	6405148	6407148	-	280	2132	186	2130	11.609	8.031	-3.57754	3.21331e-05	-5.12548e-15	-3.91086	1	1
Solyc03g034420	SL3.0ch03	6419356	6421356	+	2609	3947	2446	3966	39.796	38.147	-1.64838	0.0279154	-5.12548e-15	-3.91086	1	1
Solyc03g036477	SL3.0ch03	6507695	6509695	+	1609	4261	1544	4713	27.411	24.676	-2.7342	0.000434289	-5.12548e-15	-3.91086	1	1
Solyc03g043573	SL3.0ch03	7008765	7010765	+	139	419	24	171	24.91	12.308	-12.6027	0.000128074	-5.12548e-15	-3.91086	1	1
Solyc03g043710	SL3.0ch03	7250203	7252203	-	4844	5759	4429	5929	45.685	42.759	-2.92596	1.73664e-05	-5.12548e-15	-3.91086	1	1
Solyc03g043715	SL3.0ch03	7254191	7256191	+	9168	8096	9825	9017	53.105	52.144	-0.960581	0.0331508	-0.676372	-2.17401	0.562809	1
Solyc03g043740	SL3.0ch03	7287372	7289372	-	3271	12804	2962	14490	20.348	16.972	-3.3761	4.52846e-15	-0.214361	2.53484	0.726953	1
Solyc03g043770	SL3.0ch03	7349812	7351812	+	4926	10494	4880	11281	31.946	30.196	-1.74937	0.000534367	0.050543	1.44117	0.952392	1
Solyc03g043810	SL3.0ch03	7500513	7502513	-	2079	6366	1962	6660	24.618	22.756	-1.86238	0.00268623	-5.12548e-15	-3.91086	1	1
Solyc03g043855	SL3.0ch03	7545237	7547237	-	1472	7730	1517	8563	15.997	15.05	-0.946919	0.0339953	-5.12548e-15	-3.91086	1	1
Solyc03g043870	SL3.0ch03	7556520	7558520	-	1217	3162	703	2531	27.792	21.738	-6.05395	2.00549e-09	-1.03184	0.939041	0.0345047	0.568476
Solyc03g043890	SL3.0ch03	7585634	7587634	+	5291	10176	5249	11439	34.208	31.454	-2.75458	1.56873e-07	-1.80659	-2.06412	0.250879	1
Solyc03g044026	SL3.0ch03	7873468	7875468	+	1845	7836	1752	8331	19.058	17.376	-1.68217	0.00140392	-1.34353	-2.47771	0.288594	1
Solyc03g044220	SL3.0ch03	8502214	8504214	+	461	4127	312	3282	10.048	8.681	-1.36682	0.0186906	-0.373314	3.93613	0.450724	1
Solyc03g044300	SL3.0ch03	8788515	8790515	+	990	11930	765	11341	7.663	6.319	-1.34336	2.56746e-05	1.00811	7.94708	0.0199679	0.426649
Solyc03g044380	SL3.0ch03	8969763	8971763	+	6158	6008	4955	6340	50.616	43.869	-6.7475	1.78505e-24	-0.183776	3.49889	0.682522	1
Solyc03g044410	SL3.0ch03	9161073	9163073	+	514	1235	523	1551	29.388	25.217	-4.17125	0.00240281	-5.12548e-15	-3.91086	1	1
Solyc03g044540	SL3.0ch03	9944739	9946739	+	1707	4913	1729	5579	25.785	23.659	-2.12649	0.00233619	-5.12548e-15	-3.91086	1	1
Solyc03g044543	SL3.0ch03	10041794	10043794	-	839	1884	885	2351	30.812	27.349	-3.46303	0.00212537	-5.12548e-15	-3.91086	1	1
Solyc03g044660	SL3.0ch03	10321696	10323696	-	5602	10152	5750	10993	35.559	34.343	-1.21651	0.0117269	-0.192929	4.6313	0.590707	1
Solyc03g044747	SL3.0ch03	10480752	10482752	+	2940	6076	2651	5911	32.609	30.962	-1.6463	0.0106436	0.0599533	2.26172	0.90776	1
Solyc03g044817	SL3.0ch03	10592361	10594361	-	2843	7782	2629	8538	26.758	23.543	-3.21507	5.42216e-08	-5.12548e-15	-3.91086	1	1
Solyc03g044840	SL3.0ch03	10663301	10665301	-	6482	7390	6108	7315	46.727	45.504	-1.22323	0.0222233	-5.12548e-15	-3.91086	1	1
Solyc03g044860	SL3.0ch03	10719721	10721721	+	4289	9499	3649	10008	31.107	26.719	-4.38786	2.26815e-15	-5.12548e-15	-3.78955	1	1
Solyc03g044880	SL3.0ch03	10783480	10785480	+	6595	7738	5721	7203	46.013	44.266	-1.74622	0.00236933	0.302004	4.12068	0.348913	1
Solyc09g047850	SL3.0ch03	11611940	11613940	+	2926	5541	2151	4361	34.558	33.031	-1.52637	0.0256081	-2.78373	-3.83217	0.672673	1
Solyc03g046207	SL3.0ch03	11974719	11976719	-	268	5302	84	4687	4.811	1.761	-3.05085	5.76408e-18	-0.174168	1.97128	0.700942	1
Solyc03g046260	SL3.0ch03	12110412	12112412	+	4525	10628	5081	12437	29.862	29.004	-0.857621	0.0428887	-5.12548e-15	-3.91086	1	1
Solyc03g046380	SL3.0ch03	12425686	12427686	+	3923	10640	3552	11095	26.938	24.251	-2.68743	1.55411e-07	0.219639	3.03615	0.784131	1
Solyc03g046430	SL3.0ch03	12636230	12638230	-	5230	10711	5478	12002	32.808	31.339	-1.46981	0.00246327	-5.12548e-15	-3.91086	1	1
Solyc03g046440	SL3.0ch03	12793579	12795579	-	8706	8881	9115	10307	49.502	46.931	-2.57116	7.76939e-07	-5.12548e-15	-3.91086	1	1
Solyc03g046515	SL3.0ch03	13054093	13056093	+	3140	6473	3281	7304	32.664	30.997	-1.66741	0.00651013	-5.12548e-15	-3.91086	1	1
Solyc03g046543	SL3.0ch03	13067863	13069863	+	891	2021	638	1622	30.598	28.23	-2.36744	0.0319778	-5.12548e-15	-3.91086	1	1
Solyc03g046594	SL3.0ch03	13366976	13368976	+	1129	1045	536	581	51.932	47.986	-3.94625	0.0170482	-5.12548e-15	-3.91086	1	1
Solyc03g046598	SL3.0ch03	18272312	18274312	-	3548	8757	3185	8918	28.834	26.316	-2.51802	9.46491e-06	-5.12548e-15	-3.91086	1	1
Solyc03g070460	SL3.0ch03	18472420	18474420	-	311	325	555	753	48.899	42.431	-6.46818	0.00437116	-5.12548e-15	-3.91086	1	1
Solyc03g070480	SL3.0ch03	18510220	18512220	-	721	5461	761	7026	11.663	9.773	-1.89019	0.000254645	-5.12548e-15	-3.91086	1	1
Solyc03g071560	SL3.0ch03	20324940	20326940	+	34	177	17	546	16.114	3.02	-13.0942	1.63633e-09	1.09171	-1.76221	0.386774	1
Solyc03g071730	SL3.0ch03	20620095	20622095	-	3254	4760	3633	5626	40.604	39.237	-1.36644	0.0332918	-1.96378	-3.63177	1	1
Solyc03g071760	SL3.0ch03	20805872	20807872	-	2698	6684	2423	6413	28.757	27.422	-1.33528	0.0232379	-5.12548e-15	-3.91086	1	1
Solyc03g051620	SL3.0ch03	21645969	21647969	+	763	1460	699	1514	34.323	31.586	-2.7369	0.0274738	-5.12548e-15	-3.91086	1	1
Solyc03g051627	SL3.0ch03	22308000	22310000	-	2557	5444	3194	7336	31.959	30.332	-1.62612	0.0100545	-5.12548e-15	-3.91086	1	1
Solyc03g051720	SL3.0ch03	22372004	22374004	-	3076	5587	3129	6399	35.507	32.84	-2.66728	0.000120391	-5.12548e-15	-3.91086	1	1
Solyc03g051723	SL3.0ch03	22373358	22375358	-	6062	7418	4819	6394	44.97	42.977	-1.99342	0.00109047	-5.12548e-15	-3.83515	1	1
Solyc03g051885	SL3.0ch03	23312340	23314340	-	12	48	19	225	20	7.787	-12.2131	0.00494775	0.337466	2.19582	0.497769	1
Solyc03g052970	SL3.0ch03	23522463	23524463	+	630	7427	487	7048	7.819	6.463	-1.35612	0.000730294	-5.12548e-15	-3.91086	1	1
Solyc03g052980	SL3.0ch03	23552579	23554579	-	3242	4912	2586	4159	39.76	38.34	-1.42012	0.0381709	-0.146719	6.95876	0.591683	1
Solyc03g052990	SL3.0ch03	23587694	23589694	+	3908	7182	3859	7874	35.239	32.89	-2.34882	0.000140936	-5.12548e-15	-3.86883	1	1
Solyc03g053027	SL3.0ch03	23866972	23868972	+	3130	4222	1882	2845	42.573	39.814	-2.75961	0.00175001	0.187923	2.81691	0.656793	1
Solyc03g058200	SL3.0ch03	25460002	25462002	+	2082	5794	1163	3527	26.435	24.797	-1.6373	0.0219002	-5.12548e-15	-3.91086	1	1
Solyc03g058215	SL3.0ch03	25654011	25656011	+	1756	5211	1738	5581	25.205	23.746	-1.45812	0.0218055	-5.12548e-15	-3.91086	1	1
Solyc03g058243	SL3.0ch03	25772371	25774371	-	1065	1712	1330	2401	38.351	35.647	-2.70346	0.0135087	-5.12548e-15	-3.91086	1	1
Solyc03g058420	SL3.0ch03	26692725	26694725	+	2633	5357	2243	4878	32.954	31.498	-1.45531	0.0284361	1.84891	-3.87283	1	1
Solyc03g058440	SL3.0ch03	26759333	26761333	+	2758	8522	2887	10497	24.45	21.571	-2.87982	9.23586e-08	1.18448	-3.39566	0.675213	1
Solyc03g058460	SL3.0ch03	26833349	26835349	-	3332	8299	3150	8771	28.648	26.424	-2.22362	0.000105459	-5.12548e-15	-3.91086	1	1
Solyc03g058570	SL3.0ch03	27086318	27088318	-	3438	6214	3008	5742	35.62	34.377	-1.24242	0.0374492	-5.12548e-15	-3.91086	1	1
Solyc03g058853	SL3.0ch03	28415337	28417337	-	2265	8584	1839	7411	20.878	19.881	-0.996419	0.0393563	-5.12548e-15	-3.91086	1	1
Solyc03g058857	SL3.0ch03	28416044	28418044	-	2619	9174	2061	7898	22.208	20.695	-1.51324	0.00407381	-5.12548e-15	-3.91086	1	1
Solyc03g058910	SL3.0ch03	28823337	28825337	+	3430	9419	928	5901	26.695	13.589	-13.1056	7.44084e-103	1.41818	-2.09797	0.131392	0.99983
Solyc03g058935	SL3.0ch03	29118387	29120387	-	2617	5519	2676	6118	32.166	30.43	-1.73584	0.00851249	-5.12548e-15	-3.91086	1	1
Solyc03g058953	SL3.0ch03	29318510	29320510	-	2019	6134	1484	5040	24.764	22.747	-2.01711	0.00269139	-5.12548e-15	-3.91086	1	1
Solyc03g058957	SL3.0ch03	29355225	29357225	-	2212	6443	2073	6804	25.557	23.352	-2.205	0.000474109	-5.12548e-15	-3.91086	1	1
Solyc03g059035	SL3.0ch03	29691131	29693131	-	2648	5159	2979	6522	33.918	31.355	-2.56368	0.000253445	-1.93381	-3.87151	1	1
Solyc03g059050	SL3.0ch03	29695468	29697468	+	2181	7078	2144	7358	23.555	22.564	-0.991789	0.0498296	-5.12548e-15	-3.91086	1	1
Solyc03g059080	SL3.0ch03	29809196	29811196	+	2112	4438	2265	5381	32.244	29.623	-2.62094	0.000540002	-1.9338	-3.87151	1	1
Solyc05g046085	SL3.0ch03	30181433	30183433	-	2048	4134	1371	3154	33.128	30.298	-2.83009	0.00122271	-4.82487	-3.34054	0.0564714	0.719071
Solyc03g059243	SL3.0ch03	30239869	30241869	-	1431	2869	1269	3147	33.279	28.736	-4.54266	4.48206e-06	-5.12548e-15	-3.91086	1	1
Solyc03g059310	SL3.0ch03	30863439	30865439	+	6044	8445	5618	8503	41.714	39.785	-1.92969	0.000605534	-0.139889	6.59175	0.61727	1
Solyc03g059316	SL3.0ch03	31006595	31008595	-	1937	3776	1577	3344	33.905	32.046	-1.8588	0.0217522	-5.12548e-15	-3.91086	1	1
Solyc03g059350	SL3.0ch03	31077657	31079657	-	3340	2619	4088	3417	56.05	54.47	-1.57932	0.0338702	0.298677	1.56642	0.544935	1
Solyc03g059420	SL3.0ch03	31889480	31891480	+	5854	9658	5707	10596	37.739	35.006	-2.7327	4.22972e-07	-0.273398	5.26811	0.40612	1
Solyc03g059430	SL3.0ch03	31918021	31920021	-	181	3664	136	4127	4.707	3.19	-1.51717	0.000319757	-2.74443	-3.61642	0.6729	1
Solyc03g059500	SL3.0ch03	32315935	32317935	-	5037	6793	4222	6175	42.578	40.608	-1.97032	0.00184506	-0.509942	-1.8671	0.601348	1
Solyc03g061560	SL3.0ch03	32596858	32598858	-	2937	3404	1863	2806	46.318	39.901	-6.41614	2.92415e-11	-5.12548e-15	-3.91086	1	1
Solyc03g061570	SL3.0ch03	32594957	32596957	+	3815	5072	3809	5356	42.928	41.56	-1.36759	0.0312888	-5.12548e-15	-3.91086	1	1
Solyc03g062740	SL3.0ch03	34269575	34271575	+	3335	9095	3079	8958	26.83	25.579	-1.25079	0.0143101	-0.865457	-0.776418	0.386507	1
Solyc03g062830	SL3.0ch03	34556879	34558879	-	4749	6391	4346	7093	42.63	37.993	-4.63733	2.08861e-12	-0.456759	4.83379	0.118529	0.958302
Solyc03g062960	SL3.0ch03	34754173	34756173	-	13189	8861	12801	9118	59.814	58.401	-1.41267	0.00165629	-5.12548e-15	-3.91086	1	1
Solyc03g063050	SL3.0ch03	35289204	35291204	+	3501	4543	4014	5543	43.523	42.001	-1.5225	0.0220737	1.84901	-3.76026	1	1
Solyc03g063070	SL3.0ch03	35359523	35361523	+	1716	6171	1499	7246	21.757	17.141	-4.6161	1.02641e-13	-5.12548e-15	-3.91086	1	1
Solyc03g063168	SL3.0ch03	35704858	35706858	-	3273	10779	2435	8654	23.292	21.959	-1.33336	0.00694221	-5.12548e-15	-3.91086	1	1
Solyc03g063180	SL3.0ch03	35726686	35728686	-	5248	9758	4134	8526	34.973	32.654	-2.31865	4.01524e-05	-5.12548e-15	-3.91086	1	1
Solyc03g063350	SL3.0ch03	36621522	36623522	-	5998	12001	5295	11674	33.324	31.204	-2.12011	1.90923e-05	0.401372	4.78267	0.144156	1
Solyc03g063580	SL3.0ch03	37280464	37282464	-	4681	7145	3707	6245	39.582	37.249	-2.33348	0.000301393	-0.428709	-3.16153	1	1
Solyc03g063710	SL3.0ch03	37871509	37873509	-	97	2358	16	826	3.951	1.9	-2.05088	0.00249384	-5.12548e-15	-3.69192	1	1
Solyc03g063770	SL3.0ch03	38366976	38368976	+	1600	3946	1284	3976	28.85	24.411	-4.43897	2.0709e-07	-5.12548e-15	-3.91086	1	1
Solyc03g064047	SL3.0ch03	40352384	40354384	-	1509	3734	1241	3582	28.781	25.731	-3.05036	0.000423365	-5.12548e-15	-3.91086	1	1
Solyc03g065060	SL3.0ch03	41410904	41412904	+	3245	9761	3362	11084	24.95	23.273	-1.67714	0.000797015	-5.12548e-15	-3.91086	1	1
Solyc03g065190	SL3.0ch03	42449851	42451851	+	1780	4999	1148	4070	26.258	22.001	-4.25679	7.97074e-08	-5.12548e-15	-3.91086	1	1
Solyc03g065200	SL3.0ch03	42571837	42573837	+	432	5051	216	4191	7.879	4.901	-2.97761	2.6273e-09	-5.12548e-15	-3.91086	1	1
Solyc03g013020	SL3.0ch03	49265270	49267270	-	722	2590	255	1354	21.8	15.848	-5.95116	7.01253e-07	-5.12548e-15	-3.91086	1	1
Solyc03g077920	SL3.0ch03	49959611	49961611	-	3208	4404	2138	3613	42.144	37.176	-4.96784	8.15103e-09	-0.368004	3.01467	0.410547	1
Solyc03g077950	SL3.0ch03	50061144	50063144	-	872	5438	688	5450	13.819	11.209	-2.61047	9.81472e-06	0.366533	1.17359	0.546004	1
Solyc03g077990	SL3.0ch03	50255705	50257705	-	2426	5950	2016	5819	28.964	25.731	-3.23301	3.83882e-06	-5.12548e-15	-3.82867	1	1
Solyc03g078000	SL3.0ch03	50258747	50260747	+	1243	4574	1084	4894	21.368	18.133	-3.23525	9.41313e-06	-0.645205	6.17903	0.0218615	0.452251
Solyc03g078055	SL3.0ch03	51272212	51274212	+	412	4280	179	2849	8.781	5.911	-2.86941	2.92572e-06	-0.192855	0.983581	0.762708	1
Solyc03g078090	SL3.0ch03	51472535	51474535	+	3143	5049	3745	6483	38.367	36.615	-1.75153	0.0082225	0.933239	-0.911407	0.507084	1
Solyc03g078175	SL3.0ch03	51580051	51582051	-	1628	2494	1909	3323	39.495	36.487	-3.00839	0.00189281	-5.12548e-15	-3.91086	1	1
Solyc03g078190	SL3.0ch03	51594359	51596359	-	8223	10748	7652	10956	43.345	41.122	-2.22301	1.1342e-05	1.84891	-3.87283	1	1
Solyc03g078207	SL3.0ch03	51602956	51604956	-	2606	5600	1349	3281	31.757	29.136	-2.62118	0.00130032	-5.12548e-15	-3.91086	1	1
Solyc03g078250	SL3.0ch03	51678480	51680480	+	1047	3260	755	2627	24.309	22.324	-1.9852	0.0213811	-5.12548e-15	-3.91086	1	1
Solyc03g078420	SL3.0ch03	52316807	52318807	+	2128	5602	1920	6322	27.529	23.295	-4.23379	1.1051e-09	-5.12548e-15	-3.91086	1	1
Solyc03g078515	SL3.0ch03	52484962	52486962	-	3845	3825	3390	3927	50.13	46.33	-3.79991	3.1259e-06	-0.894612	-0.598061	0.44796	1
Solyc03g078535	SL3.0ch03	52556638	52558638	+	8213	10578	6748	10358	43.707	39.448	-4.25895	6.84757e-16	-5.12548e-15	-3.91086	1	1
Solyc03g078540	SL3.0ch03	52556675	52558675	+	7764	10556	6412	10295	42.38	38.379	-4.00079	4.85739e-14	-5.12548e-15	-3.91086	1	1
Solyc03g078670	SL3.0ch03	52750136	52752136	+	6166	6282	6685	7617	49.534	46.742	-2.79235	4.77091e-06	-5.12548e-15	-3.91086	1	1
Solyc03g078843	SL3.0ch03	53041461	53043461	+	4254	4644	3973	4841	47.808	45.076	-2.73248	0.000204329	-5.12548e-15	-3.91086	1	1
Solyc03g079850	SL3.0ch03	53097195	53099195	-	2698	11175	2505	12054	19.448	17.206	-2.242	1.02701e-06	0.394585	4.48188	0.218152	1
Solyc03g079860	SL3.0ch03	53105320	53107320	-	1569	7871	938	7402	16.621	11.247	-5.37376	2.08698e-24	-0.939809	-3.17626	0.719185	1
Solyc03g079900	SL3.0ch03	53214605	53216605	+	10382	10538	9895	10742	49.627	47.948	-1.67929	0.00043827	-5.12548e-15	-3.91086	1	1
Solyc03g079920	SL3.0ch03	53269615	53271615	+	8946	6517	10589	8050	57.854	56.811	-1.04324	0.026431	0.194252	4.31893	0.535695	1
Solyc03g079930	SL3.0ch03	53281240	53283240	-	96	2497	55	2526	3.702	2.131	-1.57132	0.000607424	-0.408006	-3.05538	0.871767	1
Solyc03g080075	SL3.0ch03	53387819	53389819	+	1073	7379	755	7973	12.695	8.65	-4.0449	1.82965e-17	-3.19508	-2.02986	0.0307308	0.539611
Solyc03g080110	SL3.0ch03	53438773	53440773	+	278	2266	185	1907	10.928	8.843	-2.08446	0.0111255	-0.91464	1.17867	0.376766	1
Solyc03g080160	SL3.0ch03	53481791	53483791	-	129	3498	67	2811	3.557	2.328	-1.22865	0.0026123	0.382457	7.45938	0.171634	1
Solyc03g081257	SL3.0ch03	53580356	53582356	-	35	337	1	228	9.409	0.437	-8.97192	5.10296e-07	-5.12548e-15	-3.87428	1	1
Solyc03g081300	SL3.0ch03	53610908	53612908	-	39	838	9	645	4.447	1.376	-3.07083	0.000372413	-0.650523	5.54823	0.113709	0.943708
Solyc03g081335	SL3.0ch03	53680047	53682047	+	3484	8050	3302	8099	30.206	28.962	-1.24397	0.0204344	-0.0976097	-2.39546	1	1
Solyc03g082355	SL3.0ch03	53726704	53728704	-	3823	8636	3326	8889	30.685	27.229	-3.45583	2.81833e-09	1.13747	-1.23018	0.248093	1
Solyc03g082480	SL3.0ch03	53827687	53829687	+	2091	12550	1465	12074	14.282	10.821	-3.46122	5.18032e-18	0.474002	1.39819	0.422674	1
Solyc03g082730	SL3.0ch03	54061325	54063325	-	236	7056	178	8513	3.236	2.048	-1.18833	2.81122e-06	-0.153256	-0.247746	0.897236	1
Solyc03g082740	SL3.0ch03	54059679	54061679	+	298	3997	195	3587	6.938	5.156	-1.7823	0.000624327	0.139678	4.05268	0.694593	1
Solyc03g082860	SL3.0ch03	54171199	54173199	+	1734	4072	1738	4788	29.866	26.632	-3.23372	5.57121e-05	0.0601759	0.725763	0.937812	1
Solyc03g082910	SL3.0ch03	54216053	54218053	+	73	1190	10	385	5.78	2.532	-3.24824	0.00464837	0.200719	5.29989	0.477753	1
Solyc03g082950	SL3.0ch03	54239361	54241361	+	2305	8777	2150	8832	20.799	19.577	-1.222	0.013086	-3.9665	-3.31484	0.20901	1
Solyc03g082990	SL3.0ch03	54261722	54263722	+	5414	4641	5571	5663	53.844	49.591	-4.25333	7.70543e-10	-0.54432	2.22724	0.338395	1
Solyc03g083090	SL3.0ch03	54335366	54337366	-	244	2343	63	801	9.432	7.292	-2.14011	0.030572	0.314551	5.30097	0.440551	1
Solyc03g083110	SL3.0ch03	54353294	54355294	+	3257	8501	2830	9817	27.7	22.377	-5.32344	2.53748e-21	-5.12548e-15	-3.91086	1	1
Solyc03g083120	SL3.0ch03	54359876	54361876	+	8538	10157	9068	12925	45.67	41.231	-4.43866	6.2711e-19	-3.94939	-3.21506	0.144148	1
Solyc03g083130	SL3.0ch03	54368723	54370723	+	1488	3590	1597	4358	29.303	26.818	-2.48507	0.00233095	-3.16706	1.45044	1.30763e-07	4.58544e-05
Solyc03g083250	SL3.0ch03	54525140	54527140	+	316	3007	259	3186	9.509	7.518	-1.99134	0.00213804	0.179435	6.5369	0.6051	1
Solyc03g083350	SL3.0ch03	54606227	54608227	+	2871	7822	3195	9205	26.849	25.766	-1.08321	0.0309429	0.202028	5.80477	0.500999	1
Solyc03g083430	SL3.0ch03	54734540	54736540	-	4139	5012	4474	5719	45.23	43.893	-1.33716	0.0312321	-0.00049228	6.86394	0.999096	1
Solyc03g083440	SL3.0ch03	54761701	54763701	+	4369	10699	4467	11756	28.995	27.535	-1.46024	0.00253544	-0.602326	3.57184	0.182133	1
Solyc03g083510	SL3.0ch03	54859845	54861845	-	5440	10622	5049	10268	33.869	32.963	-0.905385	0.0432487	-5.12548e-15	-3.91086	1	1
Solyc03g083550	SL3.0ch03	54919187	54921187	-	2543	7319	2325	7791	25.786	22.983	-2.80245	3.84267e-06	0.0814681	1.20442	0.878161	1
Solyc03g083580	SL3.0ch03	54972348	54974348	-	294	1126	68	434	20.704	13.546	-7.15841	0.000237227	-0.213686	2.55371	0.619142	1
Solyc03g083590	SL3.0ch03	54970453	54972453	+	282	1143	19	127	19.789	13.014	-6.77578	0.0237833	-1.70604	-1.36892	0.0887008	0.861899
Solyc03g083730	SL3.0ch03	55096268	55098268	+	1582	8008	1302	7310	16.496	15.118	-1.37791	0.00626844	-2.61849	3.6795	0.0153784	0.365727
Solyc03g083770	SL3.0ch03	55131320	55133320	+	4138	7446	3495	6729	35.722	34.184	-1.53741	0.00958882	-6.04018	1.96268	1.9395e-14	2.04035e-11
Solyc03g083785	SL3.0ch03	55145864	55147864	-	2153	4137	2674	5526	34.229	32.61	-1.61918	0.0208826	-1.8328	-3.22033	1	1
Solyc03g083810	SL3.0ch03	55146051	55148051	-	2005	4052	2188	5150	33.102	29.817	-3.28481	3.86791e-05	4.26368	-3.45541	0.170717	1
Solyc03g083890	SL3.0ch03	55247231	55249231	-	2614	8581	2976	10278	23.35	22.454	-0.896111	0.0464162	-5.12548e-15	-3.91086	1	1
Solyc03g083900	SL3.0ch03	55256897	55258897	-	2392	9799	2464	11392	19.621	17.783	-1.83812	0.000111154	0.249532	4.45262	0.55598	1
Solyc03g083910	SL3.0ch03	55283499	55285499	-	5294	11363	4479	10907	31.782	29.111	-2.67155	2.24702e-07	1.32927	10.3033	0.0411179	0.621074
Solyc03g083930	SL3.0ch03	55293577	55295577	-	5471	5334	5459	5623	50.634	49.26	-1.3739	0.0216556	-5.12548e-15	-3.91086	1	1
Solyc03g093040	SL3.0ch03	55626126	55628126	+	3013	8973	2684	8465	25.138	24.074	-1.06375	0.0307019	-5.12548e-15	-3.91086	1	1
Solyc03g093170	SL3.0ch03	55811218	55813218	-	1708	5142	1394	4734	24.934	22.748	-2.18626	0.00224388	-5.12548e-15	-3.75218	1	1
Solyc03g093240	SL3.0ch03	55853890	55855890	+	940	6491	283	3734	12.65	7.045	-5.60465	4.98119e-21	-0.576931	4.2031	0.0851136	0.844748
Solyc03g093260	SL3.0ch03	55869105	55871105	+	560	2689	167	1410	17.236	10.59	-6.64635	7.70946e-10	0.0519764	3.27161	0.928712	1
Solyc03g093280	SL3.0ch03	55885910	55887910	+	1946	9369	1511	8229	17.198	15.513	-1.68506	0.000684758	-5.12548e-15	-3.91086	1	1
Solyc03g093290	SL3.0ch03	55894270	55896270	+	4838	8928	4658	9954	35.145	31.878	-3.26665	7.31226e-09	-5.12548e-15	-3.91086	1	1
Solyc03g093350	SL3.0ch03	56052102	56054102	-	2583	9731	2644	10507	20.976	20.105	-0.87119	0.0416722	0.338512	4.21455	0.360566	1
Solyc03g093360	SL3.0ch03	56058056	56060056	+	5636	9640	6586	11765	36.894	35.889	-1.00542	0.0283468	0.763264	7.60638	0.158645	1
Solyc03g093460	SL3.0ch03	56177274	56179274	-	1867	9758	1386	8076	16.06	14.648	-1.41215	0.00291197	-1.65628	-0.640991	0.0358157	0.580979
Solyc03g093625	SL3.0ch03	56585232	56587232	-	53	1251	8	665	4.064	1.189	-2.87571	0.000206346	0.520613	0.090652	0.441226	1
Solyc03g093715	SL3.0ch03	56783434	56785434	-	4912	5618	3004	3649	46.648	45.153	-1.49511	0.0283712	-5.12548e-15	-3.91086	1	1
Solyc03g093730	SL3.0ch03	56804862	56806862	-	1458	7323	1461	8597	16.604	14.526	-2.07828	6.93087e-05	-5.12548e-15	-3.91086	1	1
Solyc03g093900	SL3.0ch03	57017373	57019373	-	3981	6039	4313	7239	39.731	37.336	-2.39501	0.000234984	-5.12548e-15	-3.91086	1	1
Solyc03g093970	SL3.0ch03	57108435	57110435	+	6991	5839	6471	6189	54.489	51.114	-3.37573	7.46496e-08	0.055444	4.53145	0.859595	1
Solyc03g094000	SL3.0ch03	57143610	57145610	-	434	1851	268	2255	18.993	10.622	-8.37116	5.96553e-16	-5.12548e-15	-3.44456	1	1
Solyc03g094130	SL3.0ch03	57366032	57368032	+	410	3185	377	3759	11.405	9.115	-2.28964	0.000686588	-5.12548e-15	-3.91086	1	1
Solyc03g095260	SL3.0ch03	57674227	57676227	-	7607	9638	7781	10920	44.111	41.607	-2.50394	1.57987e-06	0.0100047	4.94985	0.970742	1
Solyc03g095270	SL3.0ch03	57695665	57697665	+	4683	8377	4671	8818	35.858	34.628	-1.22936	0.0186722	-5.12548e-15	-3.91086	1	1
Solyc03g095430	SL3.0ch03	57974603	57976603	-	1907	2707	1205	1876	41.331	39.111	-2.22005	0.0259721	-5.12548e-15	-3.91086	1	1
Solyc03g095460	SL3.0ch03	58011058	58013058	-	175	4390	89	3162	3.834	2.738	-1.0959	0.00522896	-5.12548e-15	-3.91086	1	1
Solyc03g095500	SL3.0ch03	58046723	58048723	+	4302	8213	4394	9477	34.375	31.678	-2.69715	3.14593e-06	-5.12548e-15	-3.91086	1	1
Solyc03g095550	SL3.0ch03	58187294	58189294	-	4245	8601	3916	8478	33.045	31.596	-1.44937	0.00794132	-5.12548e-15	-3.86962	1	1
Solyc03g095615	SL3.0ch03	58220279	58222279	-	235	1506	149	1245	13.498	10.689	-2.80932	0.0100064	-5.12548e-15	-3.91086	1	1
Solyc03g095650	SL3.0ch03	58268741	58270741	-	5360	7645	4834	7626	41.215	38.796	-2.41877	6.62967e-05	-0.967433	-0.976522	0.578225	1
Solyc03g095750	SL3.0ch03	58347218	58349218	+	3268	2567	3271	2841	56.007	53.518	-2.48919	0.00383231	-1.6899	-2.33022	0.384187	1
Solyc03g095840	SL3.0ch03	58954218	58956218	+	4470	7599	4697	8519	37.037	35.54	-1.49678	0.00769163	0.331276	6.44429	0.235245	1
Solyc03g095880	SL3.0ch03	58987676	58989676	-	14499	7509	12619	6998	65.881	64.327	-1.55373	0.000611663	3.7706	2.12987	0.146431	1
Solyc03g095900	SL3.0ch03	59007170	59009170	+	6944	6411	5734	7487	51.996	43.37	-8.62511	5.16865e-44	4.62482	10.4677	5.85993e-13	5.12652e-10
Solyc03g096030	SL3.0ch03	59271049	59273049	-	2136	6614	2024	6915	24.411	22.642	-1.76907	0.00337812	-3.83647	-3.66184	0.13715	1
Solyc03g096090	SL3.0ch03	59363974	59365974	+	1116	7530	663	7134	12.908	8.503	-4.40443	1.96458e-19	-0.620528	2.65135	0.128464	0.989448
Solyc03g096193	SL3.0ch03	59553944	59555944	-	5046	7187	4960	7688	41.249	39.216	-2.03339	0.000744145	-5.12548e-15	-3.91086	1	1
Solyc03g096220	SL3.0ch03	59584471	59586471	+	3408	5939	3400	6462	36.461	34.476	-1.98513	0.00252209	0.938919	3.8793	0.0273761	0.509197
Solyc03g096260	SL3.0ch03	59666493	59668493	+	1713	3048	1933	4093	35.98	32.078	-3.90217	1.83269e-05	-0.257945	-0.816014	0.805306	1
Solyc03g096280	SL3.0ch03	59688596	59690596	+	5218	4435	4937	5052	54.056	49.424	-4.63137	1.26285e-10	-5.12548e-15	-3.91086	1	1
Solyc03g096306	SL3.0ch03	59801899	59803899	+	2889	4216	1962	3964	40.662	33.108	-7.55317	1.66967e-18	-5.12548e-15	-3.91086	1	1
Solyc03g096500	SL3.0ch03	60055880	60057880	+	2100	7085	1590	6134	22.863	20.585	-2.27818	0.000254607	-5.12548e-15	-3.91086	1	1
Solyc03g096530	SL3.0ch03	60131622	60133622	+	2302	5450	2280	6099	29.696	27.211	-2.48468	0.000332613	-5.12548e-15	-3.91086	1	1
Solyc03g096540	SL3.0ch03	60136060	60138060	-	525	1971	691	3560	21.034	16.255	-4.77866	9.71431e-07	3.47128	0.452355	0.260096	1
Solyc03g096600	SL3.0ch03	60176491	60178491	+	2995	7162	2933	7495	29.487	28.126	-1.36085	0.0162791	-5.12548e-15	-3.91086	1	1
Solyc03g096660	SL3.0ch03	60409911	60411911	+	1746	3123	2114	4084	35.86	34.108	-1.75174	0.0279229	-1.93379	-3.87151	1	1
Solyc03g096770	SL3.0ch03	60549794	60551794	-	1965	7505	1601	6749	20.75	19.174	-1.57608	0.00523849	1.43743	1.58464	0.189176	1
Solyc03g097000	SL3.0ch03	60790926	60792926	+	796	4133	642	3684	16.149	14.84	-1.30882	0.0403278	-0.602191	4.3577	0.0411646	0.621518
Solyc03g097110	SL3.0ch03	60885757	60887757	-	2441	9477	2361	10569	20.482	18.26	-2.22176	8.46179e-06	0.537408	6.30061	0.0598283	0.735121
Solyc03g097300	SL3.0ch03	61066304	61068304	-	1256	8659	1154	8644	12.668	11.778	-0.889761	0.0289183	0.282976	4.4942	0.355198	1
Solyc03g097360	SL3.0ch03	61107738	61109738	+	6618	9649	6886	10498	40.684	39.611	-1.07246	0.0228514	0.383252	5.30287	0.253956	1
Solyc03g097400	SL3.0ch03	61162433	61164433	+	2959	8032	3040	9336	26.922	24.564	-2.35836	3.17609e-05	0.197235	2.26148	0.676831	1
Solyc03g097430	SL3.0ch03	61185732	61187732	+	4845	8260	4606	8886	36.971	34.139	-2.83187	1.38342e-06	0.99427	1.53639	0.0741836	0.800421
Solyc03g097470	SL3.0ch03	61248899	61250899	-	11057	10998	11630	12295	50.134	48.61	-1.52352	0.00074552	-0.0145416	8.20466	0.974102	1
Solyc03g097530	SL3.0ch03	61306226	61308226	-	1087	10640	1006	11161	9.269	8.268	-1.00094	0.00380083	-0.642898	0.777589	0.444276	1
Solyc03g097540	SL3.0ch03	61307579	61309579	-	4255	12353	3505	11237	25.62	23.776	-1.84458	0.000119486	0.373972	-2.19808	0.795098	1
Solyc03g097570	SL3.0ch03	61337974	61339974	-	6708	7589	6204	8014	46.919	43.635	-3.2841	2.93487e-08	0.436937	-3.08511	0.937155	1
Solyc03g097600	SL3.0ch03	61372502	61374502	-	695	6830	565	6585	9.236	7.902	-1.33378	0.00257174	4.24091	-1.53252	0.047805	0.664411
Solyc03g097630	SL3.0ch03	61396100	61398100	+	2438	13555	2454	14873	15.244	14.163	-1.0813	0.00331012	-0.167032	5.90539	0.694136	1
Solyc03g097670	SL3.0ch03	61433676	61435676	-	8827	23206	7598	21347	27.556	26.25	-1.30617	0.000206122	0.883867	8.22637	0.0819763	0.836556
Solyc03g097680	SL3.0ch03	61445963	61447963	+	140	1435	118	1618	8.889	6.797	-2.09165	0.0143616	1.30353	-1.32645	0.143421	1
Solyc03g097695	SL3.0ch03	61449808	61451808	-	87	1897	7	796	4.385	0.872	-3.51335	3.44596e-07	0.287912	-2.67192	0.934504	1
Solyc03g097740	SL3.0ch03	61519927	61521927	-	1609	14136	1328	12631	10.219	9.514	-0.705542	0.0217815	0.357827	5.06833	0.210744	1
Solyc03g097770	SL3.0ch03	61543488	61545488	-	89	1077	1	197	7.633	0.505	-7.12788	1.30801e-05	0.657802	-1.05228	0.471544	1
Solyc03g097810	SL3.0ch03	61570678	61572678	-	534	5877	411	5157	8.329	7.381	-0.947968	0.0282584	-5.12548e-15	-3.91086	1	1
Solyc03g097888	SL3.0ch03	61713246	61715246	-	4595	5461	4135	5240	45.694	44.107	-1.58745	0.0138981	-5.12548e-15	-3.91086	1	1
Solyc03g098030	SL3.0ch03	61813396	61815396	+	7586	9699	6565	8768	43.888	42.816	-1.07162	0.0257438	-1.79112	-3.24047	0.250834	1
Solyc03g098120	SL3.0ch03	61891943	61893943	-	119	25	133	49	82.639	73.077	-9.56197	0.0232586	0.497805	3.73064	0.257576	1
Solyc03g098210	SL3.0ch03	62008212	62010212	-	1514	8362	1359	8566	15.33	13.693	-1.6374	0.000719398	0.296669	5.26879	0.39614	1
Solyc03g098220	SL3.0ch03	62015628	62017628	-	3376	9802	2908	10099	25.618	22.357	-3.26126	8.45736e-10	0.213213	6.83991	0.442426	1
Solyc03g098410	SL3.0ch03	62163567	62165567	-	478	7255	398	7002	6.181	5.378	-0.802923	0.0188698	-5.12548e-15	-3.91086	1	1
Solyc03g098470	SL3.0ch03	62193910	62195910	-	1271	5743	1405	6898	18.121	16.922	-1.19931	0.0259773	0.21631	5.60022	0.507226	1
Solyc03g098600	SL3.0ch03	62341284	62343284	-	13	299	37	1677	4.167	2.159	-2.00797	0.0230491	0.0752129	6.86707	0.782987	1
Solyc03g098660	SL3.0ch03	62392291	62394291	+	211	2204	158	2165	8.737	6.802	-1.93551	0.00809546	-1.45875	4.64516	0.0790767	0.824321
Solyc03g098700	SL3.0ch03	62415895	62417895	-	2702	4530	1768	4195	37.362	29.65	-7.71222	3.36654e-20	-1.75229	-3.65794	0.645872	1
Solyc03g098750	SL3.0ch03	62465229	62467229	-	759	10153	701	10958	6.956	6.013	-0.943123	0.00249571	-0.226459	5.32084	0.57685	1
Solyc03g098760	SL3.0ch03	62473361	62475361	-	5034	10439	4428	9921	32.534	30.859	-1.6748	0.00124063	6.31041	0.712571	0.0208252	0.438677
Solyc03g020080	SL3.0ch03	62619518	62621518	+	3186	3369	2944	3623	48.604	44.83	-3.77391	1.30801e-05	1.60165	-1.54553	0.0724037	0.792211
Solyc03g020010	SL3.0ch03	62687174	62689174	-	127	738	103	871	14.682	10.575	-4.10713	0.00512807	0.253024	0.118118	0.946824	1
Solyc03g019950	SL3.0ch03	62729302	62731302	+	2378	7639	2360	8304	23.74	22.131	-1.60911	0.00355482	0.245128	6.18308	0.365576	1
Solyc03g019900	SL3.0ch03	62764897	62766897	-	2325	5004	1828	4499	31.723	28.892	-2.83124	0.0002441	0.172674	5.3616	0.512533	1
Solyc03g019890	SL3.0ch03	62776312	62778312	-	3917	14149	3629	14387	21.682	20.143	-1.53841	0.000240231	-1.10874	2.31469	0.148708	1
Solyc03g019860	SL3.0ch03	62790995	62792995	+	479	7074	299	5517	6.342	5.141	-1.20086	0.00200663	0.258676	-2.20874	1	1
Solyc03g019670	SL3.0ch03	62927085	62929085	+	1145	5991	822	6173	16.045	11.751	-4.29415	2.89767e-13	0.455982	4.68628	0.327554	1
Solyc03g110885	SL3.0ch03	63087545	63089545	+	1050	8197	930	8419	11.355	9.948	-1.40745	0.00127496	-0.212912	5.5197	0.487865	1
Solyc03g110990	SL3.0ch03	63175021	63177021	-	3905	9912	3720	10003	28.262	27.108	-1.15451	0.0173162	-3.8693	-3.07215	0.0617084	0.74546
Solyc03g111055	SL3.0ch03	63220147	63222147	+	53	1719	35	1665	2.991	2.059	-0.932147	0.040398	-5.12548e-15	-3.91086	1	1
Solyc03g111090	SL3.0ch03	63237887	63239887	-	1395	8403	1467	9549	14.238	13.317	-0.920606	0.0275402	-0.342713	-1.19338	0.707148	1
Solyc03g111593	SL3.0ch03	63721144	63723144	-	215	1761	102	1484	10.881	6.431	-4.44929	3.20563e-06	0.239014	2.54078	0.577925	1
Solyc03g111597	SL3.0ch03	63726537	63728537	-	543	6432	328	4903	7.785	6.27	-1.51463	0.000901937	-0.453175	1.04808	0.391069	1
Solyc03g111650	SL3.0ch03	63776637	63778637	+	2412	9015	1900	9111	21.108	17.255	-3.85243	4.18083e-13	-0.0361096	3.39914	0.931081	1
Solyc03g111660	SL3.0ch03	63782992	63784992	+	9454	7436	9538	8154	55.974	53.911	-2.06258	9.0424e-05	0.120348	4.81616	0.651217	1
Solyc03g111710	SL3.0ch03	63853416	63855416	+	3833	8295	3119	8466	31.605	26.923	-4.68181	5.29888e-15	-0.914044	5.71751	0.102043	0.904305
Solyc03g111750	SL3.0ch03	63876193	63878193	-	1834	8866	1802	9261	17.14	16.289	-0.851658	0.0445935	-0.084652	-1.12554	1	1
Solyc03g111760	SL3.0ch03	63883757	63885757	-	218	1052	27	434	17.165	5.857	-11.3085	3.38039e-10	0.825214	-1.64731	0.418186	1
Solyc03g111790	SL3.0ch03	63905109	63907109	+	103	1264	59	1143	7.535	4.908	-2.62626	0.00417172	0.829935	-0.672726	0.33675	1
Solyc03g111820	SL3.0ch03	63923834	63925834	-	3959	9381	3701	9334	29.678	28.393	-1.28487	0.0117478	-0.753913	-1.0544	0.387437	1
Solyc03g111930	SL3.0ch03	63985753	63987753	+	4726	9343	4901	10865	33.592	31.086	-2.5057	3.58539e-06	-3.08851	1.71423	0.0012227	0.0716942
Solyc03g112040	SL3.0ch03	64064347	64066347	+	3481	5356	3395	5520	39.391	38.082	-1.30931	0.0357404	-5.12548e-15	3.02846	1	1
Solyc03g112060	SL3.0ch03	64077554	64079554	+	5232	9847	5449	10833	34.697	33.466	-1.23086	0.0118328	-0.785006	2.88024	0.319563	1
Solyc03g112140	SL3.0ch03	64119151	64121151	+	2209	8569	1968	9226	20.495	17.581	-2.91461	4.54625e-08	-0.0989461	3.50607	0.765202	1
Solyc03g112190	SL3.0ch03	64161112	64163112	+	5470	12300	1339	4530	30.782	22.815	-7.96743	1.19203e-31	-0.364703	1.97035	0.458316	1
Solyc03g112320	SL3.0ch03	64243128	64245128	-	442	2957	337	2588	13.004	11.521	-1.48246	0.0373271	-0.802143	0.838581	0.227611	1
Solyc03g112330	SL3.0ch03	64241644	64243644	+	422	2285	409	2801	15.589	12.741	-2.84778	0.00117129	0.9093	2.45821	0.273828	1
Solyc03g112335	SL3.0ch03	64242002	64244002	+	415	2557	372	3300	13.964	10.131	-3.83294	1.66091e-06	-3.42079	-3.69538	0.433545	1
Solyc03g112350	SL3.0ch03	64256762	64258762	+	2574	8812	1793	9018	22.607	16.585	-6.02175	6.6556e-29	-0.0729914	3.33402	0.889497	1
Solyc03g112410	SL3.0ch03	64297803	64299803	+	6238	7627	5689	7400	44.991	43.464	-1.52701	0.00670629	1.97639	-1.78611	0.105635	0.913892
Solyc03g112450	SL3.0ch03	64338946	64340946	-	2223	7611	2573	9451	22.605	21.399	-1.20638	0.0170227	0.252962	6.02892	0.319101	1
Solyc03g112650	SL3.0ch03	64505268	64507268	+	104	1615	28	789	6.05	3.427	-2.62286	0.00320456	0.282039	5.40288	0.329235	1
Solyc03g112800	SL3.0ch03	64607525	64609525	+	228	1324	104	1516	14.691	6.42	-8.27097	4.39947e-14	1.84891	-3.87283	1	1
Solyc03g112810	SL3.0ch03	64609268	64611268	+	1373	2268	1931	3714	37.709	34.207	-3.50216	0.000432791	-0.0960087	-2.52314	1	1
Solyc03g112820	SL3.0ch03	64619785	64621785	-	1055	4349	1016	5609	19.523	15.336	-4.18673	2.13673e-09	-0.0578304	2.69836	0.90631	1
Solyc03g112930	SL3.0ch03	64708839	64710839	-	1520	10754	1457	11359	12.384	11.369	-1.0153	0.00734409	0.485329	0.160659	0.641829	1
Solyc03g112990	SL3.0ch03	64775737	64777737	+	175	1872	108	2103	8.549	4.885	-3.66443	1.76483e-06	0.12942	4.34609	0.688966	1
Solyc03g112995	SL3.0ch03	64781877	64783877	-	5979	8942	6043	10997	40.071	35.464	-4.60743	5.63154e-17	-5.12548e-15	-3.91086	1	1
Solyc03g113020	SL3.0ch03	64803456	64805456	+	3514	8774	3565	9644	28.597	26.989	-1.60783	0.00261285	0.29879	6.41482	0.338505	1
Solyc03g113040	SL3.0ch03	64828430	64830430	-	2615	8958	2307	8712	22.596	20.937	-1.65913	0.00161716	-0.15301	2.03988	0.780451	1
Solyc03g113130	SL3.0ch03	64886286	64888286	-	2028	4406	2404	5664	31.52	29.797	-1.72332	0.013599	0.247697	3.03508	0.564547	1
Solyc03g113160	SL3.0ch03	64898287	64900287	-	689	7339	627	8580	8.582	6.81	-1.77243	1.1844e-05	1.8755	-3.50571	1	1
Solyc03g113170	SL3.0ch03	64898301	64900301	+	689	7339	628	8614	8.582	6.795	-1.7874	9.31349e-06	-5.33259	-3.3395	0.0753224	0.805939
Solyc03g113330	SL3.0ch03	64969764	64971764	-	69	2441	48	2842	2.749	1.661	-1.0881	0.00384048	-0.0370689	4.65863	0.905911	1
Solyc03g113390	SL3.0ch03	65022153	65024153	+	1477	7535	747	6146	16.389	10.837	-5.55218	2.27131e-23	0.559246	6.92844	0.135053	1
Solyc03g113460	SL3.0ch03	65084410	65086410	+	9574	7743	9809	9119	55.287	51.823	-3.46402	6.03733e-11	-0.0615094	2.6005	0.919258	1
Solyc03g113590	SL3.0ch03	65159555	65161555	-	5342	7548	5313	7875	41.443	40.287	-1.15635	0.02904	0.162525	5.77733	0.527992	1
Solyc03g113620	SL3.0ch03	65176086	65178086	-	4471	11060	4369	11613	28.788	27.337	-1.45058	0.0025789	0.588976	7.27211	0.308625	1
Solyc03g113720	SL3.0ch03	65269444	65271444	-	2356	7941	2572	9370	22.88	21.537	-1.34302	0.00910329	0.0865328	1.19859	0.919014	1
Solyc03g113770	SL3.0ch03	65311196	65313196	-	111	1906	0	80	5.503	0	-5.50322	0.0108408	0.360478	5.27901	0.234181	1
Solyc03g113840	SL3.0ch03	65369145	65371145	-	164	1863	60	979	8.091	5.775	-2.31599	0.0103538	-5.12548e-15	-3.59608	1	1
Solyc03g113960	SL3.0ch03	65492647	65494647	+	867	6893	692	7740	11.173	8.207	-2.96585	2.40832e-10	-2.42065	-3.25715	0.436364	1
Solyc03g113990	SL3.0ch03	65528081	65530081	-	7055	8421	6533	9378	45.587	41.06	-4.52707	1.27266e-15	0.101394	3.69858	0.83116	1
Solyc03g113995	SL3.0ch03	65524724	65526724	-	76	930	4	206	7.555	1.905	-5.64991	0.000784882	-5.12548e-15	-3.91086	1	1
Solyc03g114040	SL3.0ch03	65573143	65575143	-	5557	8044	5484	8828	40.857	38.317	-2.53979	1.2394e-05	-0.708757	0.688391	0.22247	1
Solyc03g114050	SL3.0ch03	65572664	65574664	+	5547	8516	5449	9082	39.444	37.499	-1.94479	0.000515898	0.259955	4.24498	0.398564	1
Solyc03g114165	SL3.0ch03	65664505	65666505	+	3473	5814	3182	6025	37.396	34.561	-2.8357	4.70162e-05	-0.024883	-1.59096	1	1
Solyc03g114170	SL3.0ch03	65664505	65666505	+	3473	5814	3182	6025	37.396	34.561	-2.8357	4.70162e-05	-5.12548e-15	-3.91086	1	1
Solyc03g114190	SL3.0ch03	65682498	65684498	-	1734	9377	1531	9075	15.606	14.435	-1.17093	0.00874904	-1.94409	-3.46517	1	1
Solyc03g114290	SL3.0ch03	65787823	65789823	+	1019	5538	1027	6665	15.541	13.352	-2.18911	0.000163514	0.659366	3.56552	0.0602914	0.737824
Solyc03g114390	SL3.0ch03	65875457	65877457	-	84	1660	16	575	4.817	2.707	-2.10924	0.0174229	-0.553045	1.39975	0.363489	1
Solyc03g114465	SL3.0ch03	65944569	65946569	-	91	1405	24	703	6.083	3.301	-2.78165	0.00334706	-0.385422	0.595267	0.612536	1
Solyc03g114540	SL3.0ch03	65992884	65994884	-	1249	5393	1224	6105	18.805	16.701	-2.1038	0.000789308	3.7583	-2.27768	0.0683323	0.778685
Solyc03g114620	SL3.0ch03	66028922	66030922	+	859	3942	631	3396	17.892	15.669	-2.22287	0.00336424	-5.12548e-15	-3.91086	1	1
Solyc03g114690	SL3.0ch03	66078503	66080503	-	2644	8490	2424	8317	23.747	22.568	-1.17935	0.0205493	0.262717	1.96188	0.759201	1
Solyc03g114705	SL3.0ch03	66085017	66087017	+	332	3090	238	3281	9.702	6.763	-2.93864	8.33365e-06	1.02028	-1.81175	0.601133	1
Solyc03g114920	SL3.0ch03	66268016	66270016	-	233	4404	128	3037	5.025	4.044	-0.980567	0.0241708	0.167213	5.18572	0.535913	1
Solyc03g114960	SL3.0ch03	66293927	66295927	+	8570	16268	8568	17066	34.504	33.424	-1.07922	0.00600607	-0.485896	5.22951	0.29534	1
Solyc03g115005	SL3.0ch03	66340732	66342732	+	1662	2814	1642	3545	37.131	31.656	-5.4753	2.0161e-08	-2.72963	-2.29124	0.0722252	0.79171
Solyc03g115020	SL3.0ch03	66363575	66365575	-	699	6227	520	6348	10.092	7.571	-2.52106	2.11685e-07	-0.314259	6.53438	0.332004	1
Solyc03g115025	SL3.0ch03	66362232	66364232	+	559	3768	384	3678	12.919	9.453	-3.46541	5.12988e-07	1.88701	-3.00222	0.395226	1
Solyc03g115030	SL3.0ch03	66362232	66364232	+	559	3768	384	3678	12.919	9.453	-3.46541	5.12988e-07	0.293633	2.00091	0.606185	1
Solyc03g115050	SL3.0ch03	66372359	66374359	-	9684	7149	11024	8872	57.53	55.408	-2.12173	3.66768e-05	-0.0453445	2.72624	0.9595	1
Solyc03g115140	SL3.0ch03	66414467	66416467	+	6052	7065	3990	7182	46.139	35.714	-10.4243	1.07575e-59	0.227354	2.3544	0.711483	1
Solyc03g115160	SL3.0ch03	66446164	66448164	-	1485	8674	995	7432	14.618	11.807	-2.81029	2.26152e-08	-0.884527	0.78395	0.185584	1
Solyc03g115163	SL3.0ch03	66455225	66457225	-	1843	8352	996	5164	18.077	16.169	-1.90866	0.00119979	0.333461	3.91051	0.449819	1
Solyc03g115180	SL3.0ch03	66465348	66467348	+	508	11101	455	11212	4.376	3.9	-0.476027	0.0341425	0.104816	3.11945	0.803344	1
Solyc03g115230	SL3.0ch03	66499688	66501688	-	1236	7734	1131	9808	13.779	10.339	-3.44011	1.99931e-13	0.619663	8.95366	0.215044	1
Solyc03g115250	SL3.0ch03	66526054	66528054	+	614	3672	337	2544	14.326	11.697	-2.62838	0.000907369	-0.0223196	5.14605	0.948052	1
Solyc03g115340	SL3.0ch03	66567292	66569292	-	246	339	211	859	42.051	19.72	-22.3317	4.43384e-21	-3.78811	-3.50977	0.204894	1
Solyc03g115360	SL3.0ch03	66572859	66574859	+	6750	6985	8259	8930	49.145	48.048	-1.09635	0.0277276	-0.0565793	8.37785	0.848541	1
Solyc03g115370	SL3.0ch03	66576212	66578212	+	967	2871	657	3458	25.195	15.966	-9.22944	7.80939e-24	0.0853347	6.09905	0.832871	1
Solyc03g115380	SL3.0ch03	66587719	66589719	+	665	7110	591	7690	8.553	7.137	-1.41624	0.000598713	-3.68492	-3.46937	0.372251	1
Solyc03g115450	SL3.0ch03	66638016	66640016	+	2337	7531	1822	6800	23.683	21.132	-2.55062	2.91425e-05	-0.594194	-0.992444	0.359372	1
Solyc03g115470	SL3.0ch03	66646460	66648460	+	449	4676	368	4695	8.761	7.268	-1.49256	0.00331791	0.259591	4.76287	0.377874	1
Solyc03g115510	SL3.0ch03	66661969	66663969	+	1665	10032	1569	10543	14.234	12.954	-1.28032	0.00245685	-0.0483668	4.58193	0.918606	1
Solyc03g115540	SL3.0ch03	66694168	66696168	+	3027	6899	2529	6457	30.496	28.144	-2.35189	0.000290337	-4.00723	-3.39576	0.187947	1
Solyc03g115690	SL3.0ch03	66815202	66817202	-	602	1720	803	2799	25.926	22.293	-3.63276	0.000926565	-1.1212	0.275471	0.24169	1
Solyc03g115710	SL3.0ch03	66832039	66834039	-	328	3300	291	3472	9.041	7.733	-1.3076	0.0222327	-5.12548e-15	-3.91086	1	1
Solyc03g115720	SL3.0ch03	66842367	66844367	-	4666	8087	4247	8359	36.587	33.69	-2.89716	1.32201e-06	0.130193	4.93685	0.63444	1
Solyc03g115740	SL3.0ch03	66852709	66854709	-	218	2497	140	2242	8.029	5.877	-2.15205	0.00185362	-0.155426	7.04983	0.692359	1
Solyc03g115750	SL3.0ch03	66852026	66854026	+	131	1774	66	1221	6.877	5.128	-1.74844	0.025524	1.82275	-3.87342	1	1
Solyc03g115780	SL3.0ch03	66876301	66878301	-	543	1073	446	1165	33.601	27.685	-5.91682	0.000206179	0.394185	0.838805	0.657602	1
Solyc03g115870	SL3.0ch03	66951811	66953811	+	527	2945	209	1993	15.179	9.491	-5.6872	3.94397e-10	-1.24212	4.35115	0.00533622	0.192392
Solyc03g115890	SL3.0ch03	66969755	66971755	+	1511	1605	1103	2237	48.492	33.024	-15.4677	7.11327e-36	1.38318	0.618751	0.114583	0.945269
Solyc03g115980	SL3.0ch03	67018175	67020175	+	1993	4436	2244	5665	31	28.373	-2.62742	0.000427222	-0.189741	5.07396	0.707179	1
Solyc03g116060	SL3.0ch03	67058370	67060370	-	783	2838	521	2211	21.624	19.07	-2.55358	0.00736682	0.0924262	4.64044	0.746639	1
Solyc03g116067	SL3.0ch03	67058370	67060370	-	783	2838	521	2211	21.624	19.07	-2.55358	0.00736682	-5.12548e-15	-3.91086	1	1
Solyc03g116130	SL3.0ch03	67118879	67120879	-	2002	4612	2033	5279	30.269	27.804	-2.46552	0.000906253	5.91524	-2.83034	0.00209156	0.10376
Solyc03g116140	SL3.0ch03	67117607	67119607	+	1957	2390	1998	3147	45.02	38.834	-6.18573	1.53384e-09	0.166535	4.44422	0.572301	1
Solyc03g116243	SL3.0ch03	67225091	67227091	-	4767	5024	4579	5114	48.688	47.24	-1.44729	0.0226219	-5.12548e-15	-3.91086	1	1
Solyc03g116270	SL3.0ch03	67247413	67249413	+	1055	1391	868	1372	43.132	38.75	-4.38164	0.00153378	-5.12548e-15	-3.91086	1	1
Solyc03g116290	SL3.0ch03	67251085	67253085	+	145	1063	128	1285	12.003	9.059	-2.94457	0.00818843	0.0145861	-3.79985	1	1
Solyc03g116350	SL3.0ch03	67308924	67310924	+	3458	7922	2673	7319	30.387	26.751	-3.63524	5.46964e-09	0.51069	6.07006	0.0599788	0.736212
Solyc03g116400	SL3.0ch03	67341349	67343349	+	73	2187	43	2133	3.23	1.976	-1.25399	0.00611627	-5.12548e-15	-3.91086	1	1
Solyc03g116410	SL3.0ch03	67341349	67343349	+	73	2187	43	2133	3.23	1.976	-1.25399	0.00611627	2.23223	-3.01546	0.333593	1
Solyc03g116480	SL3.0ch03	67370237	67372237	+	5027	5795	6216	7494	46.452	45.339	-1.1125	0.0400244	0.0151972	4.15135	0.97023	1
Solyc03g116520	SL3.0ch03	67390855	67392855	+	65	2168	26	1578	2.911	1.621	-1.28993	0.00554567	-0.132459	-1.8202	1	1
Solyc03g116530	SL3.0ch03	67398567	67400567	-	856	5483	707	5630	13.504	11.157	-2.34701	4.96416e-05	0.21153	4.65671	0.516948	1
Solyc03g116580	SL3.0ch03	67424207	67426207	-	150	2435	28	1095	5.803	2.493	-3.30939	6.73314e-06	0.584043	-2.43586	0.731262	1
Solyc03g116590	SL3.0ch03	67424207	67426207	-	150	2435	28	1095	5.803	2.493	-3.30939	6.73314e-06	0.671595	2.12704	0.158796	1
Solyc03g116650	SL3.0ch03	67458238	67460238	+	696	2366	399	1775	22.73	18.353	-4.37698	9.71633e-05	-5.12548e-15	-3.91086	1	1
Solyc03g116670	SL3.0ch03	67465723	67467723	+	191	2502	117	2008	7.092	5.506	-1.58658	0.0147764	-0.157716	7.89615	0.688405	1
Solyc03g116760	SL3.0ch03	67535659	67537659	-	3424	5469	3431	6514	38.502	34.5	-4.00244	1.50596e-08	-0.249467	7.00477	0.345406	1
Solyc03g116770	SL3.0ch03	67537443	67539443	+	2818	8767	2858	9652	24.325	22.846	-1.47883	0.00419084	0.304176	2.11825	0.614241	1
Solyc03g116830	SL3.0ch03	67584775	67586775	-	4954	9448	4793	9817	34.398	32.806	-1.5917	0.00258028	0.0676804	4.05079	0.87929	1
Solyc03g116840	SL3.0ch03	67584838	67586838	+	4954	9415	4796	9858	34.477	32.728	-1.74873	0.00107779	-0.0449713	2.58096	0.921135	1
Solyc03g116975	SL3.0ch03	67735083	67737083	-	4574	8419	938	3200	35.204	22.668	-12.5356	4.60626e-52	-5.12548e-15	-3.72725	1	1
Solyc03g116990	SL3.0ch03	67741788	67743788	-	3297	8065	2271	6059	29.018	27.263	-1.75487	0.00417374	1.25244	2.29205	0.020654	0.436641
Solyc03g117010	SL3.0ch03	67767402	67769402	-	9749	9617	7124	8487	50.341	45.634	-4.70631	5.33049e-18	-0.150833	4.67167	0.603291	1
Solyc03g117020	SL3.0ch03	67769911	67771911	+	5642	8634	2834	5223	39.521	35.174	-4.34649	1.74834e-10	0.438064	6.22148	0.0952251	0.885811
Solyc03g117050	SL3.0ch03	67797259	67799259	+	4857	3426	3677	3946	58.638	48.236	-10.4026	1.60126e-38	0.0603716	-0.857109	0.976367	1
Solyc03g117190	SL3.0ch03	67882308	67884308	+	47	3201	24	2986	1.447	0.797	-0.649702	0.00914066	-0.0204229	1.96856	0.968281	1
Solyc03g117220	SL3.0ch03	67904217	67906217	-	6730	9148	2416	6025	42.386	28.622	-13.7635	4.72556e-99	-5.12548e-15	-3.82946	1	1
Solyc03g117245	SL3.0ch03	67920586	67922586	-	494	6565	354	5588	6.998	5.958	-1.04057	0.00927393	-5.12548e-15	-3.91086	1	1
Solyc03g117250	SL3.0ch03	67923442	67925442	-	1957	4920	935	3384	28.457	21.649	-6.80865	1.61681e-15	-5.12548e-15	-3.91086	1	1
Solyc03g117270	SL3.0ch03	67929798	67931798	+	231	5697	117	4312	3.897	2.642	-1.25508	0.000291504	1.20634	3.42907	0.123697	0.975179
Solyc03g117280	SL3.0ch03	67941004	67943004	+	1099	9600	421	6356	10.272	6.212	-4.0598	9.38697e-21	-0.575271	6.84415	0.172413	1
Solyc03g117340	SL3.0ch03	67975257	67977257	-	1052	6192	176	1918	14.522	8.405	-6.1174	5.80795e-14	-5.12548e-15	-3.91086	1	1
Solyc03g117350	SL3.0ch03	67981501	67983501	-	4965	11150	4727	11189	30.81	29.7	-1.11013	0.016353	-0.146042	3.6189	0.689367	1
Solyc03g117390	SL3.0ch03	68028399	68030399	+	206	4775	164	5413	4.136	2.941	-1.19507	0.000664228	0.0143526	-0.383705	1	1
Solyc03g117420	SL3.0ch03	68053906	68055906	-	1235	1942	13	1127	38.873	1.14	-37.7328	3.83157e-174	0.398197	9.17553	0.338136	1
Solyc03g117430	SL3.0ch03	68081875	68083875	+	9611	11327	8002	10308	45.902	43.703	-2.19929	1.09385e-05	-0.564306	7.22872	0.135758	1
Solyc03g117460	SL3.0ch03	68096484	68098484	+	135	1066	130	1327	11.241	8.922	-2.31819	0.0255104	-5.12548e-15	-3.91086	1	1
Solyc03g117470	SL3.0ch03	68105545	68107545	-	5132	5600	553	834	47.82	39.87	-7.94938	2.71219e-08	4.22519	2.11599	3.20221e-12	2.54526e-09
Solyc03g117480	SL3.0ch03	68113304	68115304	-	7350	8849	6573	8669	45.373	43.124	-2.24891	4.78559e-05	-0.629991	7.91002	0.0597328	0.734458
Solyc03g117540	SL3.0ch03	68146348	68148348	+	955	7725	773	7948	11.002	8.864	-2.13864	2.22774e-06	-0.370858	2.7009	0.583651	1
Solyc03g117600	SL3.0ch03	68197926	68199926	+	1888	10817	869	8950	14.86	8.85	-6.0101	1.96264e-42	0.393425	2.96895	0.424267	1
Solyc03g117640	SL3.0ch03	68215185	68217185	-	9350	9732	4634	8555	48.999	35.135	-13.8637	5.06267e-134	0.400628	2.00228	0.485856	1
Solyc03g117660	SL3.0ch03	68222076	68224076	+	195	6672	70	3207	2.84	2.136	-0.703568	0.0199958	-0.730579	3.14065	0.0595792	0.733321
Solyc03g117670	SL3.0ch03	68232190	68234190	+	337	3432	76	1363	8.941	5.281	-3.65992	6.30541e-06	0.297191	3.0027	0.482888	1
Solyc03g117675	SL3.0ch03	68238896	68240896	-	609	9033	333	7632	6.316	4.181	-2.13533	3.8178e-10	-1.74676	5.90329	5.94036e-05	0.0071782
Solyc03g117700	SL3.0ch03	68251652	68253652	-	399	4508	201	3218	8.131	5.879	-2.25233	6.68341e-05	3.06707	-2.01637	0.0342471	0.567107
Solyc03g117720	SL3.0ch03	68257121	68259121	+	2960	13981	1284	9068	17.472	12.403	-5.069	3.89794e-29	1.50972	0.257604	0.0530549	0.700763
Solyc03g117740	SL3.0ch03	68268994	68270994	+	1289	1487	5605	7174	46.434	43.861	-2.5727	0.00761259	-0.595126	4.43746	0.0540663	0.705628
Solyc03g117750	SL3.0ch03	68278547	68280547	-	7491	5101	10968	7985	59.49	57.869	-1.62069	0.00258455	0.412426	1.73494	0.500273	1
Solyc03g117830	SL3.0ch03	68328209	68330209	-	176	1359	26	368	11.466	6.599	-4.86681	0.00252423	-0.152578	-3.65651	1	1
Solyc03g117870	SL3.0ch03	68368800	68370800	-	565	8772	346	7029	6.051	4.692	-1.35967	9.11117e-05	-0.125997	7.74603	0.730751	1
Solyc03g117950	SL3.0ch03	68414680	68416680	-	5201	12786	4947	13666	28.915	26.578	-2.33713	6.095e-07	0.0787128	6.49552	0.827544	1
Solyc03g118000	SL3.0ch03	68472635	68474635	-	221	4371	54	2768	4.813	1.914	-2.89918	3.92971e-11	-0.995685	2.02569	0.248647	1
Solyc03g118030	SL3.0ch03	68508190	68510190	-	411	2454	366	3014	14.346	10.828	-3.51715	2.59124e-05	0.0738503	5.93008	0.769059	1
Solyc03g118040	SL3.0ch03	68512385	68514385	-	3108	11694	2914	11545	20.997	20.154	-0.843625	0.0363375	-0.102859	8.88743	0.718858	1
Solyc03g118190	SL3.0ch03	68618649	68620649	-	135	4239	66	2904	3.086	2.222	-0.864198	0.0150371	4.5382	0.638279	9.46242e-05	0.010382
Solyc03g118210	SL3.0ch03	68633439	68635439	-	55	1042	25	1025	5.014	2.381	-2.63272	0.000872165	1.82275	-3.87342	1	1
Solyc03g118290	SL3.0ch03	68697929	68699929	+	2586	9290	2735	10394	21.775	20.832	-0.943262	0.034149	-0.198471	8.29169	0.66051	1
Solyc03g118300	SL3.0ch03	68705046	68707046	+	83	636	86	925	11.544	8.506	-3.03738	0.020411	-0.22919	5.90948	0.503776	1
Solyc03g118333	SL3.0ch03	68724264	68726264	-	1651	7158	1338	6681	18.742	16.685	-2.05682	0.000357962	0.553111	-2.11638	0.787568	1
Solyc03g118350	SL3.0ch03	68740997	68742997	-	41	824	1	160	4.74	0.621	-4.11877	0.00519457	0.226875	4.66145	0.404088	1
Solyc03g118390	SL3.0ch03	68771870	68773870	-	15116	13487	15134	13916	52.848	52.096	-0.751218	0.0347429	0.185508	6.29223	0.558488	1
Solyc03g118450	SL3.0ch03	68809196	68811196	-	1402	6270	1216	6155	18.274	16.497	-1.77716	0.00256502	-0.833849	2.54199	0.43231	1
Solyc03g118455	SL3.0ch03	68808506	68810506	+	1385	5272	1284	5369	20.805	19.3	-1.5056	0.01591	0.696712	-3.76085	1	1
Solyc03g118470	SL3.0ch03	68812950	68814950	+	7521	10420	8175	11862	41.921	40.8	-1.12122	0.0142213	-0.709847	7.63966	0.213312	1
Solyc03g118490	SL3.0ch03	68821455	68823455	+	1035	1911	739	2288	35.132	24.414	-10.7188	3.82572e-19	-0.742789	-0.123812	0.484468	1
Solyc03g118560	SL3.0ch03	68922018	68924018	+	69	1214	2	253	5.378	0.784	-4.59371	0.000313228	-5.12548e-15	-3.91086	1	1
Solyc03g118630	SL3.0ch03	68964890	68966890	-	3078	6428	2303	5772	32.38	28.52	-3.85943	3.52998e-08	-0.183124	2.44185	0.713915	1
Solyc03g118740	SL3.0ch03	69050075	69052075	+	1618	8551	1382	8309	15.911	14.261	-1.65045	0.00081364	-0.721286	1.96693	0.163204	1
Solyc03g118860	SL3.0ch03	69136893	69138893	-	121	860	174	2029	12.334	7.898	-4.43603	8.82898e-05	-0.959353	4.47702	0.00284027	0.128109
Solyc03g118960	SL3.0ch03	69195029	69197029	-	4207	4555	4538	5892	48.014	43.509	-4.50504	6.3112e-10	0.852017	-1.78992	0.442159	1
Solyc03g119080	SL3.0ch03	69271436	69273436	-	2384	9659	2250	10207	19.796	18.062	-1.7336	0.000376614	0.0906491	6.84438	0.772151	1
Solyc03g119150	SL3.0ch03	69329333	69331333	+	69	1952	25	1057	3.414	2.311	-1.10362	0.0465233	-2.43314	-0.441461	0.00655315	0.220294
Solyc03g119220	SL3.0ch03	69362957	69364957	-	3010	10425	2818	11056	22.404	20.311	-2.09279	2.10208e-05	0.497095	-0.878965	0.683126	1
Solyc03g119270	SL3.0ch03	69394048	69396048	-	3041	2881	2578	2910	51.351	46.975	-4.37568	2.82289e-06	0.362233	4.6713	0.223943	1
Solyc03g119300	SL3.0ch03	69425186	69427186	+	7355	4015	7338	4468	64.688	62.155	-2.53294	5.05108e-05	-1.49016	-1.39626	0.23144	1
Solyc03g119305	SL3.0ch03	69430801	69432801	+	2457	5782	2224	5538	29.822	28.652	-1.16917	0.0494127	-0.635606	2.28563	0.182995	1
Solyc03g119350	SL3.0ch03	69469862	69471862	+	44	1134	23	932	3.735	2.408	-1.32677	0.048579	1.84909	-3.63143	1	1
Solyc03g119503	SL3.0ch03	69571346	69573346	+	91	1146	2	445	7.357	0.447	-6.90908	1.81569e-10	-5.12548e-15	-3.91086	1	1
Solyc03g119507	SL3.0ch03	69572273	69574273	+	60	874	15	798	6.424	1.845	-4.57896	1.32076e-06	-5.12548e-15	-3.91086	1	1
Solyc03g119560	SL3.0ch03	69609712	69611712	+	1037	3556	443	1772	22.578	20	-2.57784	0.0086885	-5.12548e-15	-3.91086	1	1
Solyc03g119610	SL3.0ch03	69667805	69669805	+	5758	8315	6415	9919	40.915	39.274	-1.64132	0.00221838	0.998301	6.19045	0.0136227	0.340293
Solyc03g119675	SL3.0ch03	69717515	69719515	+	2129	6041	1489	5490	26.059	21.335	-4.72332	1.52275e-11	-5.12548e-15	-3.91086	1	1
Solyc03g119690	SL3.0ch03	69725947	69727947	-	3057	10767	2255	10022	22.114	18.368	-3.74604	1.1311e-13	-5.12548e-15	-3.91086	1	1
Solyc03g119740	SL3.0ch03	69781923	69783923	-	178	1831	21	344	8.86	5.753	-3.1067	0.0254651	0.473065	4.70765	0.214157	1
Solyc03g119750	SL3.0ch03	69783001	69785001	-	116	1541	22	482	7.001	4.365	-2.63552	0.0190438	-0.661061	2.78929	0.117223	0.95313
Solyc03g119770	SL3.0ch03	69809696	69811696	+	1899	5701	2014	7040	24.987	22.244	-2.74253	2.73569e-05	-5.12548e-15	-3.91086	1	1
Solyc03g119830	SL3.0ch03	69892579	69894579	-	1430	6475	1215	5954	18.09	16.948	-1.14185	0.0333144	0.301167	2.36623	0.502382	1
Solyc03g119850	SL3.0ch03	69892579	69894579	-	1430	6475	1215	5954	18.09	16.948	-1.14185	0.0333144	-5.12548e-15	-2.97064	1	1
Solyc03g119860	SL3.0ch03	69891802	69893802	+	1328	12648	1152	12792	9.502	8.262	-1.24039	0.000197802	-0.0927169	-2.16099	1	1
Solyc03g119895	SL3.0ch03	69913821	69915821	-	1109	7137	856	7054	13.449	10.822	-2.6272	3.34701e-07	-5.12548e-15	-3.91086	1	1
Solyc03g119990	SL3.0ch03	69985581	69987581	+	1139	11915	1162	13429	8.725	7.964	-0.761482	0.0124596	-0.0900803	-0.835311	0.928339	1
Solyc03g120010	SL3.0ch03	70004987	70006987	-	6960	12066	7252	13649	36.582	34.697	-1.88462	6.72293e-05	0.163167	8.09205	0.520568	1
Solyc03g120050	SL3.0ch03	70035533	70037533	-	841	6272	567	4714	11.823	10.737	-1.08682	0.0308575	0.905192	-1.258	0.24367	1
Solyc03g120070	SL3.0ch03	70048740	70050740	+	69	170	45	301	28.87	13.006	-15.8645	2.38488e-06	-0.0660804	0.889233	0.922437	1
Solyc03g120080	SL3.0ch03	70056121	70058121	+	43	845	2	144	4.842	1.37	-3.47248	0.0365858	-0.213136	4.06624	0.558315	1
Solyc03g120230	SL3.0ch03	70170492	70172492	+	4364	8379	4396	8856	34.246	33.172	-1.0739	0.0332006	-0.615515	3.35672	0.107814	0.923106
Solyc03g120340	SL3.0ch03	70251175	70253175	-	14782	9489	16033	11160	60.904	58.96	-1.94393	6.39325e-06	0.0434529	3.97851	0.907367	1
Solyc03g120390	SL3.0ch03	70292585	70294585	+	3226	10203	2962	10362	24.023	22.231	-1.79208	0.000368286	0.412816	7.98483	0.205257	1
Solyc03g120440	SL3.0ch03	70315832	70317832	-	200	5046	119	4670	3.812	2.485	-1.32757	0.000121713	1.52042	5.69552	0.00145538	0.0805823
Solyc03g120475	SL3.0ch03	70344306	70346306	-	4450	9729	4201	10037	31.384	29.506	-1.87889	0.000417737	0.204616	1.90134	0.819487	1
Solyc03g120540	SL3.0ch03	70391328	70393328	+	2841	7293	2442	7923	28.034	23.56	-4.47428	4.41643e-13	0.416368	4.3685	0.291778	1
Solyc03g120550	SL3.0ch03	70403546	70405546	+	2272	10432	1424	10775	17.884	11.673	-6.21104	1.78405e-42	0.586156	8.99696	0.112866	0.942318
Solyc03g120590	SL3.0ch03	70432001	70434001	+	330	6549	47	2358	4.797	1.954	-2.84295	1.26551e-10	-0.582699	-1.234	0.665965	1
Solyc03g120610	SL3.0ch03	70444646	70446646	-	991	6830	817	6830	12.671	10.684	-1.98709	9.67155e-05	0.274196	4.24409	0.410355	1
Solyc03g120640	SL3.0ch03	70459507	70461507	+	2361	5533	2376	6584	29.909	26.518	-3.39093	1.04048e-06	-0.513441	6.65953	0.138891	1
Solyc03g120690	SL3.0ch03	70476760	70478760	-	7565	8374	7204	8957	47.462	44.576	-2.88575	2.25207e-07	0.111391	2.0543	0.829266	1
Solyc03g120720	SL3.0ch03	70495698	70497698	+	1418	5043	1338	5933	21.947	18.402	-3.5452	2.47042e-07	0.0809993	6.05748	0.772099	1
Solyc03g120820	SL3.0ch03	70569346	70571346	-	2826	7113	2305	6565	28.433	25.986	-2.44697	0.000129021	1.03966	3.31006	0.0169146	0.38807
Solyc03g120830	SL3.0ch03	70569346	70571346	-	2826	7113	2305	6565	28.433	25.986	-2.44697	0.000129021	-1.03091	-1.59327	0.318549	1
Solyc03g120890	SL3.0ch03	70608822	70610822	-	3462	10806	3721	12337	24.264	23.172	-1.09184	0.014002	0.214693	2.43611	0.68296	1
Solyc03g120920	SL3.0ch03	70634776	70636776	-	3237	5447	3586	7021	37.275	33.808	-3.46759	5.8642e-07	-5.12548e-15	-3.91086	1	1
Solyc03g121050	SL3.0ch03	70767624	70769624	-	1558	12840	1466	13160	10.821	10.023	-0.797701	0.0143129	0.870272	6.14188	0.00605217	0.209965
Solyc03g121200	SL3.0ch03	70855736	70857736	-	173	2490	93	1697	6.496	5.196	-1.3009	0.0390309	1.84915	-3.72582	1	1
Solyc03g121250	SL3.0ch03	70904617	70906617	-	91	495	3	444	15.529	0.671	-14.8579	1.22816e-19	0.0367202	3.40152	0.917672	1
Solyc03g121360	SL3.0ch03	70956394	70958394	+	2260	8324	1846	8300	21.353	18.194	-3.15862	1.39728e-08	-0.136479	8.25004	0.707796	1
Solyc03g121420	SL3.0ch03	71017701	71019701	+	2564	7856	2399	8214	24.607	22.604	-2.00217	0.000445201	-0.747761	0.527503	0.466341	1
Solyc03g121510	SL3.0ch03	71086480	71088480	-	4886	5178	6243	7176	48.549	46.524	-2.0257	0.00139252	-5.12548e-15	-3.91086	1	1
Solyc03g121630	SL3.0ch03	71214933	71216933	-	2953	10931	2645	10689	21.269	19.837	-1.43258	0.00222213	-0.249143	4.41803	0.412917	1
Solyc03g121670	SL3.0ch03	71258412	71260412	-	1244	10138	708	8136	10.93	8.005	-2.92411	3.59005e-12	0.14339	3.44871	0.672792	1
Solyc03g121680	SL3.0ch03	71258694	71260694	+	2284	11201	1627	8807	16.937	15.593	-1.34408	0.00319848	-1.83419	-2.66194	1	1
Solyc03g121770	SL3.0ch03	71326879	71328879	-	490	5080	373	4417	8.797	7.787	-1.01007	0.0313062	-1.26624	-2.08028	0.412439	1
Solyc03g121820	SL3.0ch03	71341545	71343545	+	7911	11093	7577	11281	41.628	40.179	-1.44884	0.0025429	-0.19126	6.94734	0.439843	1
Solyc03g121930	SL3.0ch03	71422478	71424478	-	1542	1776	1590	2066	46.474	43.49	-2.98363	0.00729341	-0.139063	1.27091	0.824669	1
Solyc03g121980	SL3.0ch03	71481229	71483229	-	526	1678	828	2955	23.866	21.887	-1.97831	0.0376441	0.0208434	6.78731	0.935076	1
Solyc03g122010	SL3.0ch03	71495875	71497875	-	3245	7931	3900	10066	29.035	27.925	-1.11047	0.0268454	-5.1519	-2.95047	0.115532	0.94822
Solyc03g122030	SL3.0ch03	71506591	71508591	+	2030	8799	1139	6905	18.746	14.16	-4.58634	1.2301e-16	0.909724	4.57522	0.00459298	0.176079
Solyc03g122060	SL3.0ch03	71531699	71533699	-	87	699	19	271	11.069	6.552	-4.51698	0.0148964	-5.12548e-15	-3.91086	1	1
Solyc03g122080	SL3.0ch03	71532637	71534637	+	278	1033	19	271	21.205	6.552	-14.6535	4.67612e-10	-0.882144	-1.12672	0.503016	1
Solyc03g122120	SL3.0ch03	71559774	71561774	-	3372	8392	3302	8869	28.664	27.13	-1.53366	0.00482786	-0.180125	6.22556	0.553149	1
Solyc03g122130	SL3.0ch03	71560816	71562816	+	3201	7039	2783	7007	31.26	28.427	-2.8328	1.06323e-05	7.35773	1.24728	1.11155e-07	3.93643e-05
Solyc03g122150	SL3.0ch03	71567107	71569107	+	88	1281	0	84	6.428	0	-6.42805	0.00462773	-5.12548e-15	-3.87171	1	1
Solyc03g122155	SL3.0ch03	71569700	71571700	+	616	1987	451	1647	23.665	21.497	-2.16834	0.0383871	-5.12548e-15	-3.91086	1	1
Solyc03g122300	SL3.0ch03	71654059	71656059	+	2544	11358	1538	11176	18.3	12.097	-6.20262	4.72108e-44	0.297739	5.70983	0.425463	1
Solyc03g122320	SL3.0ch03	71670620	71672620	+	1314	5528	993	5645	19.205	14.959	-4.24559	8.47766e-11	-5.12548e-15	-3.91086	1	1
Solyc03g123460	SL3.0ch03	71805479	71807479	+	7861	9213	7430	9643	46.041	43.519	-2.52176	2.65431e-06	-0.152518	5.56314	0.69674	1
Solyc03g123490	SL3.0ch03	71819299	71821299	+	1866	12136	1677	11966	13.327	12.292	-1.03465	0.00575445	0.154934	6.47037	0.633941	1
Solyc03g123540	SL3.0ch03	71869785	71871785	-	641	4064	438	4168	13.624	9.509	-4.11447	7.58674e-10	0.947368	3.67705	0.171088	1
Solyc03g123600	SL3.0ch03	71913195	71915195	-	25	796	0	108	3.045	0	-3.04507	0.04837	-0.130565	4.76699	0.67332	1
Solyc03g123730	SL3.0ch03	71969909	71971909	+	94	2350	43	1571	3.846	2.664	-1.18197	0.0211426	0.0156129	5.21606	0.961444	1
Solyc03g123770	SL3.0ch03	72011363	72013363	+	78	1963	10	458	3.822	2.137	-1.6849	0.0439559	0.328884	-1.82678	0.845363	1
Solyc03g123780	SL3.0ch03	72018040	72020040	-	41	630	29	955	6.11	2.947	-3.16313	0.0016255	-0.393172	4.25551	0.345491	1
Solyc03g123860	SL3.0ch03	72051784	72053784	+	480	4066	248	2603	10.559	8.699	-1.86003	0.00524825	-0.839014	-0.170197	0.361075	1
Solyc04g005100	SL3.0ch04	78669	80669	+	2146	8586	1808	9528	19.996	15.949	-4.04708	1.03991e-14	0.208606	7.67931	0.490681	1
Solyc04g005130	SL3.0ch04	92094	94094	-	143	4133	84	3184	3.344	2.57	-0.773868	0.0281076	0.467317	2.73844	0.335118	1
Solyc04g005170	SL3.0ch04	118622	120622	-	5458	11286	4565	9892	32.597	31.576	-1.02035	0.0272364	-5.12548e-15	-3.91086	1	1
Solyc04g005240	SL3.0ch04	184521	186521	-	570	3592	304	2286	13.695	11.737	-1.95789	0.0112046	-5.12548e-15	-3.91086	1	1
Solyc04g005280	SL3.0ch04	202902	204902	+	5426	9981	5411	10594	35.218	33.808	-1.40957	0.00502517	0.465519	5.05246	0.102661	0.906213
Solyc04g005320	SL3.0ch04	233355	235355	-	1398	7223	1006	5653	16.216	15.107	-1.10884	0.0309305	-3.18668	-1.26928	0.0158231	0.372059
Solyc04g005400	SL3.0ch04	280573	282573	+	1215	7474	1031	6957	13.983	12.907	-1.07634	0.0219957	-5.12548e-15	-3.91086	1	1
Solyc04g005430	SL3.0ch04	303465	305465	-	7087	10187	6896	10806	41.027	38.956	-2.07093	6.03586e-05	0.0880215	4.37924	0.804286	1
Solyc04g005440	SL3.0ch04	305615	307615	+	1844	9059	1660	8700	16.913	16.023	-0.88961	0.039333	1.35685	-1.13658	0.281677	1
Solyc04g005480	SL3.0ch04	323831	325831	-	1373	5880	1011	4730	18.93	17.61	-1.31993	0.0274511	-0.0175711	7.53776	0.97491	1
Solyc04g005510	SL3.0ch04	340522	342522	+	4704	9942	4318	10255	32.118	29.63	-2.48785	3.88212e-06	0.294933	5.84733	0.399291	1
Solyc04g005520	SL3.0ch04	351027	353027	-	939	1894	1287	3130	33.145	29.137	-4.00765	0.000228001	0.460514	1.23048	0.548653	1
Solyc04g005620	SL3.0ch04	409722	411722	-	1264	3082	658	2270	29.084	22.473	-6.61154	4.14726e-10	-3.08733	-1.81985	0.0476391	0.663792
Solyc04g005670	SL3.0ch04	441972	443972	+	6448	11439	5223	12026	36.049	30.28	-5.76851	8.72461e-30	-0.107423	7.72927	0.806487	1
Solyc04g005680	SL3.0ch04	449566	451566	-	6763	10591	6500	11164	38.971	36.798	-2.17284	2.32265e-05	-0.0125015	8.48705	0.963685	1
Solyc04g005685	SL3.0ch04	449685	451685	+	6748	10547	6492	11170	39.017	36.757	-2.26018	1.18717e-05	-0.114706	-2.96567	1	1
Solyc04g005690	SL3.0ch04	450343	452343	+	4720	9552	3907	9798	33.072	28.508	-4.56391	3.16394e-16	0.227621	5.76366	0.406572	1
Solyc04g005710	SL3.0ch04	459107	461107	+	3259	6369	3131	7557	33.849	29.295	-4.55465	4.85272e-12	-5.12548e-15	-3.91086	1	1
Solyc04g005780	SL3.0ch04	494610	496610	+	1598	7412	1680	8812	17.736	16.012	-1.72365	0.000935405	0.188354	-0.252288	0.803209	1
Solyc04g005820	SL3.0ch04	528642	530642	-	517	3326	383	2873	13.453	11.763	-1.69013	0.017935	0.37683	3.58299	0.250675	1
Solyc04g007020	SL3.0ch04	741769	743769	-	806	1546	267	1418	34.269	15.846	-18.423	1.35248e-39	0.427651	7.57469	0.132675	1
Solyc04g007075	SL3.0ch04	797920	799920	-	124	690	17	268	15.233	5.965	-9.2685	2.57839e-05	-0.0914541	-0.873875	0.94174	1
Solyc04g007090	SL3.0ch04	804562	806562	-	31	115	2	302	21.233	0.658	-20.575	3.53814e-14	-2.13741	-3.49025	0.448871	1
Solyc04g007100	SL3.0ch04	822412	824412	-	541	5037	218	2393	9.699	8.349	-1.34953	0.0249682	-0.0245991	4.37166	0.939977	1
Solyc04g007150	SL3.0ch04	864209	866209	+	4667	8785	4695	9905	34.694	32.158	-2.53619	6.04169e-06	-0.615905	4.70496	0.105558	0.913892
Solyc04g007160	SL3.0ch04	868666	870666	+	558	4698	366	4169	10.616	8.071	-2.54588	1.42389e-05	-0.58728	5.08171	0.0404683	0.616143
Solyc04g007330	SL3.0ch04	1046598	1048598	-	3949	10850	3087	11734	26.684	20.829	-5.85568	1.29612e-31	-0.0196696	2.31166	0.972403	1
Solyc04g007370	SL3.0ch04	1072779	1074779	-	5742	6519	6732	8512	46.831	44.162	-2.66978	8.91646e-06	-0.0622229	6.11639	0.803366	1
Solyc04g007380	SL3.0ch04	1072258	1074258	+	5751	7339	6750	9350	43.934	41.925	-2.00884	0.000390681	-5.12548e-15	-3.91086	1	1
Solyc04g007410	SL3.0ch04	1093206	1095206	-	10706	9510	10632	10432	52.958	50.475	-2.48331	4.59472e-07	-1.83623	2.50534	0.00175127	0.0933525
Solyc04g007560	SL3.0ch04	1240315	1242315	+	172	3390	126	3186	4.829	3.804	-1.0244	0.0195655	0.434004	6.65325	0.161544	1
Solyc04g007590	SL3.0ch04	1275135	1277135	-	2961	11335	2489	11791	20.712	17.43	-3.28212	2.91484e-12	0.0583462	-1.69056	1	1
Solyc04g007795	SL3.0ch04	1486468	1488468	+	563	1962	584	2434	22.297	19.351	-2.94647	0.00449843	-1.93067	-3.83596	1	1
Solyc04g007800	SL3.0ch04	1493714	1495714	-	1653	8607	1512	8557	16.111	15.016	-1.09472	0.0165646	-0.166237	0.555865	0.868094	1
Solyc04g007870	SL3.0ch04	1542709	1544709	+	6331	11449	6131	12792	35.607	32.4	-3.2077	1.34835e-10	-0.118217	6.93687	0.702481	1
Solyc04g007890	SL3.0ch04	1563570	1565570	+	5145	8172	4938	8173	38.635	37.663	-0.971797	0.0490394	0.219396	7.31395	0.458041	1
Solyc04g007900	SL3.0ch04	1570328	1572328	+	4447	12312	3787	12141	26.535	23.776	-2.75926	1.14872e-08	-0.693635	5.74345	0.0884313	0.860683
Solyc04g008040	SL3.0ch04	1698994	1700994	+	5150	10583	4763	12262	32.734	27.977	-4.75724	2.44948e-20	-2.6091	2.24114	0.00301741	0.133408
Solyc04g008050	SL3.0ch04	1705795	1707795	+	1615	5008	1034	4093	24.385	20.168	-4.21698	6.08929e-08	-0.274541	4.61809	0.37757	1
Solyc04g008160	SL3.0ch04	1837644	1839644	+	320	2202	161	2103	12.688	7.111	-5.57704	1.68361e-10	0.323253	-3.05164	1	1
Solyc04g008230	SL3.0ch04	1904871	1906871	-	6020	11133	5645	12139	35.096	31.742	-3.35389	4.67947e-11	0.350589	0.0187394	0.581515	1
Solyc04g008250	SL3.0ch04	1924325	1926325	+	1846	6544	1804	6902	22.002	20.721	-1.28104	0.0213341	-1.93811	-0.347568	0.1157	0.948945
Solyc04g008350	SL3.0ch04	2007328	2009328	-	1884	7292	1410	7466	20.532	15.886	-4.64629	1.33823e-15	-5.12548e-15	-3.91086	1	1
Solyc04g008390	SL3.0ch04	2030128	2032128	-	62	674	7	339	8.424	2.023	-6.40079	1.97139e-05	-0.331398	0.873196	0.55277	1
Solyc04g008385	SL3.0ch04	2028519	2030519	-	151	1490	15	369	9.202	3.906	-5.29546	0.000279556	1.62963	-3.19925	0.471111	1
Solyc04g008510	SL3.0ch04	2131690	2133690	+	5042	4591	5301	5217	52.341	50.399	-1.9416	0.00352595	0.25428	5.43064	0.352216	1
Solyc04g008540	SL3.0ch04	2165189	2167189	-	1620	4262	1724	4992	27.542	25.67	-1.87161	0.00981824	0.177793	5.31126	0.519202	1
Solyc04g008620	SL3.0ch04	2239911	2241911	-	8625	10329	9219	11894	45.505	43.665	-1.83987	0.000162093	-0.171359	5.32394	0.573452	1
Solyc04g008665	SL3.0ch04	2299395	2301395	+	49	341	13	354	12.564	3.542	-9.02187	3.88887e-06	0.0796368	4.77368	0.767512	1
Solyc04g008780	SL3.0ch04	2418847	2420847	+	366	1942	276	1906	15.858	12.649	-3.20894	0.00136244	0.496475	1.4253	0.280989	1
Solyc04g008790	SL3.0ch04	2425782	2427782	-	2041	3281	2150	3709	38.35	36.696	-1.65456	0.0348924	0.545738	2.90247	0.170729	1
Solyc04g008870	SL3.0ch04	2490281	2492281	+	8720	10220	9374	11975	46.04	43.908	-2.13175	1.53719e-05	-0.097575	1.95903	0.823122	1
Solyc04g008950	SL3.0ch04	2551840	2553840	+	318	2038	70	684	13.497	9.284	-4.21363	0.00147173	0.0159318	1.67536	0.981613	1
Solyc04g008960	SL3.0ch04	2557570	2559570	+	375	2116	215	1415	15.054	13.19	-1.86401	0.0475592	0.738141	0.374216	0.409492	1
Solyc04g009000	SL3.0ch04	2581509	2583509	-	708	3676	739	4317	16.15	14.616	-1.53334	0.0213746	-0.432461	1.06492	0.417776	1
Solyc04g009170	SL3.0ch04	2669540	2671540	+	6278	10987	6780	12354	36.363	35.434	-0.928278	0.03226	0.346782	1.75604	0.532391	1
Solyc04g009220	SL3.0ch04	2708338	2710338	-	1123	3274	755	3384	25.54	18.241	-7.29902	8.30551e-16	-0.185667	1.05844	0.744516	1
Solyc04g009230	SL3.0ch04	2711899	2713899	-	4064	8942	4567	10708	31.247	29.899	-1.34859	0.00796437	0.337508	6.16268	0.246071	1
Solyc04g009260	SL3.0ch04	2711622	2713622	+	3994	10805	3967	11900	26.988	25.002	-1.98673	5.78931e-05	-1.16911	-0.427891	0.169918	1
Solyc04g009310	SL3.0ch04	2758833	2760833	+	9018	10103	9393	10924	47.163	46.232	-0.930586	0.0316372	0.303982	4.22895	0.349411	1
Solyc04g009430	SL3.0ch04	2841588	2843588	+	3310	3223	3521	3809	50.666	48.035	-2.63038	0.00132211	-0.487986	4.05798	0.128884	0.991385
Solyc04g009465	SL3.0ch04	2864547	2866547	+	6386	6821	5916	6662	48.353	47.035	-1.31864	0.0181169	-0.259282	-1.9635	0.899598	1
Solyc04g009490	SL3.0ch04	2907360	2909360	+	93	622	51	511	13.007	9.075	-3.93226	0.0167694	3.51066	-3.66007	0.328375	1
Solyc04g009515	SL3.0ch04	2941196	2943196	+	28	1128	14	989	2.422	1.396	-1.02633	0.041896	0.134802	-0.78614	0.898907	1
Solyc04g009550	SL3.0ch04	2953931	2955931	+	6518	6238	6333	6537	51.098	49.207	-1.89006	0.00157539	0.44239	3.73849	0.228343	1
Solyc04g009610	SL3.0ch04	2997473	2999473	-	854	2355	429	1659	26.613	20.546	-6.06667	4.3028e-07	-0.294416	0.703301	0.628909	1
Solyc04g009730	SL3.0ch04	3050245	3052245	+	3164	4047	2163	3288	43.877	39.681	-4.19662	2.12811e-06	-1.32938	2.42389	0.0205032	0.434895
Solyc04g009740	SL3.0ch04	3072491	3074491	-	5965	11911	5183	12040	33.369	30.093	-3.27528	6.70001e-11	-0.0349763	6.39915	0.908429	1
Solyc04g009750	SL3.0ch04	3073106	3075106	+	6755	11819	6394	11588	36.368	35.558	-0.810261	0.0497332	-5.12548e-15	-3.91086	1	1
Solyc04g009795	SL3.0ch04	3100683	3102683	-	5048	11180	5579	13874	31.107	28.679	-2.42735	6.0983e-07	0.903094	3.81084	0.0663642	0.770212
Solyc04g009840	SL3.0ch04	3162060	3164060	+	2533	3772	2499	4747	40.174	34.488	-5.68647	1.33681e-11	-0.153216	2.03199	0.807749	1
Solyc04g010100	SL3.0ch04	3398911	3400911	-	4352	5972	3708	5578	42.154	39.931	-2.22312	0.00104579	0.354593	4.75949	0.26819	1
Solyc04g010120	SL3.0ch04	3416594	3418594	-	5444	10179	5972	11788	34.846	33.626	-1.21993	0.0105775	0.684963	6.02669	0.0196748	0.423677
Solyc04g010130	SL3.0ch04	3425800	3427800	-	2216	3179	1864	2914	41.075	39.012	-2.06293	0.0181192	1.64009	-3.07166	0.474526	1
Solyc04g010200	SL3.0ch04	3518738	3520738	+	8150	9510	8468	10698	46.149	44.182	-1.96708	0.000115939	1.17171	0.375948	0.161644	1
Solyc04g011640	SL3.0ch04	4105832	4107832	-	2563	4077	2494	4617	38.599	35.072	-3.52697	1.55153e-05	0.00390347	1.66164	1	1
Solyc04g011670	SL3.0ch04	4147531	4149531	+	1441	5982	1279	5909	19.413	17.794	-1.61909	0.00682253	-0.409122	3.59429	0.389779	1
Solyc04g011750	SL3.0ch04	4200801	4202801	+	2327	6487	1908	6042	26.401	24	-2.40118	0.00026352	1.84954	-0.045506	1	1
Solyc04g011790	SL3.0ch04	4230798	4232798	-	4705	9040	4416	8922	34.231	33.108	-1.12222	0.0260549	-5.12548e-15	-3.91086	1	1
Solyc04g011840	SL3.0ch04	4253918	4255918	+	1098	3146	1100	3533	25.872	23.743	-2.1291	0.0111573	-5.12548e-15	-3.91086	1	1
Solyc04g011880	SL3.0ch04	4280552	4282552	-	1616	4977	1417	4807	24.511	22.767	-1.74414	0.0113101	-5.12548e-15	-3.56769	1	1
Solyc04g012060	SL3.0ch04	4391104	4393104	-	2127	6487	2267	7359	24.692	23.551	-1.14156	0.0358032	0.0901818	4.58608	0.868112	1
Solyc04g012100	SL3.0ch04	4410416	4412416	+	203	2868	87	2082	6.61	4.011	-2.59916	3.83638e-05	-5.12548e-15	-3.87428	1	1
Solyc04g012110	SL3.0ch04	4415581	4417581	+	440	4739	244	3355	8.496	6.78	-1.71619	0.00193701	-5.12548e-15	-3.91086	1	1
Solyc04g014260	SL3.0ch04	4562353	4564353	-	3038	10931	2679	10597	21.748	20.179	-1.56889	0.000992213	-2.94584	-3.52851	0.248588	1
Solyc04g014300	SL3.0ch04	4594940	4596940	+	96	445	62	598	17.745	9.394	-8.35098	1.97761e-05	-5.12548e-15	-3.91086	1	1
Solyc04g014360	SL3.0ch04	4617217	4619217	-	1090	9064	706	6397	10.735	9.939	-0.795224	0.0446237	-1.57319	-2.93392	0.514256	1
Solyc04g014430	SL3.0ch04	4671157	4673157	-	987	5297	725	4949	15.707	12.778	-2.92897	4.75425e-06	-5.12548e-15	-3.91086	1	1
Solyc04g014520	SL3.0ch04	4793239	4795239	+	4619	11695	4255	11894	28.313	26.348	-1.96472	5.82796e-05	-3.69154	-3.75752	0.44114	1
Solyc04g014530	SL3.0ch04	4800368	4802368	+	1037	10325	873	9827	9.127	8.159	-0.968036	0.00629184	1.4458	2.31633	0.0892392	0.862319
Solyc04g014572	SL3.0ch04	4831796	4833796	+	164	1604	56	1290	9.276	4.16	-5.11554	2.10397e-08	0.768643	-2.24338	0.647063	1
Solyc04g014576	SL3.0ch04	4859468	4861468	+	4665	4931	4756	5265	48.614	47.46	-1.15367	0.0495562	-5.12548e-15	-3.87428	1	1
Solyc04g014578	SL3.0ch04	4872047	4874047	-	1923	11404	1980	12856	14.429	13.346	-1.08344	0.00500377	-2.06846	-2.73636	0.327523	1
Solyc04g014740	SL3.0ch04	4996022	4998022	+	160	1420	25	849	10.127	2.86	-7.26617	6.90096e-12	0.567042	4.17925	0.0914623	0.870009
Solyc04g014800	SL3.0ch04	5036881	5038881	+	4466	11208	4303	11360	28.493	27.472	-1.02066	0.022959	0.44999	3.79723	0.224203	1
Solyc04g014880	SL3.0ch04	5131905	5133905	+	6435	8431	6762	9442	43.287	41.73	-1.55626	0.0033522	0.857083	-3.7657	1	1
Solyc04g014960	SL3.0ch04	5177878	5179878	+	149	2148	37	731	6.487	4.818	-1.66901	0.045893	-0.149769	2.30549	0.74434	1
Solyc04g015130	SL3.0ch04	5298113	5300113	-	5139	7171	5010	7308	41.747	40.672	-1.07436	0.0415791	-0.0457157	5.6037	0.866728	1
Solyc04g015200	SL3.0ch04	5384502	5386502	-	3085	11084	2097	10046	21.773	17.269	-4.50368	1.21025e-19	0.399374	4.3332	0.272405	1
Solyc04g015250	SL3.0ch04	5456667	5458667	+	60	690	0	82	8	0	-8	0.00167264	-5.12548e-15	-3.91086	1	1
Solyc04g015270	SL3.0ch04	5469978	5471978	+	6384	12431	6390	13863	33.93	31.551	-2.37949	5.50423e-07	-0.222088	6.42748	0.42996	1
Solyc04g015300	SL3.0ch04	5508960	5510960	-	7010	8348	7168	8865	45.644	44.708	-0.936174	0.0459324	0.0118901	3.87001	0.971534	1
Solyc04g015380	SL3.0ch04	5586335	5588335	-	5881	8406	5792	9380	41.163	38.176	-2.98771	1.7685e-07	-2.26442	-2.21204	0.189569	1
Solyc04g015390	SL3.0ch04	5603522	5605522	-	3091	8201	3614	10902	27.373	24.897	-2.4767	6.20661e-06	-0.649261	0.302114	0.558758	1
Solyc04g015500	SL3.0ch04	5713811	5715811	+	3649	2265	3776	2551	61.701	59.681	-2.02031	0.012197	0.857998	3.96396	0.0228329	0.463501
Solyc04g015585	SL3.0ch04	5886066	5888066	+	53	937	42	1434	5.354	2.846	-2.50801	0.00120354	0.814362	6.307	0.064882	0.762462
Solyc04g015710	SL3.0ch04	6013435	6015435	-	2239	4802	2162	5314	31.799	28.919	-2.88025	0.000127674	-0.317657	-0.198475	0.701484	1
Solyc04g015820	SL3.0ch04	6116043	6118043	-	3268	11176	3031	11022	22.625	21.568	-1.05696	0.0167805	3.75093	-3.73335	0.374736	1
Solyc04g015930	SL3.0ch04	6387382	6389382	+	2211	6393	1871	5766	25.697	24.499	-1.1982	0.0392154	-5.12548e-15	-3.91086	1	1
Solyc04g016060	SL3.0ch04	6735871	6737871	-	924	6523	806	7392	12.408	9.832	-2.57601	3.31301e-07	-2.26856	-2.50916	0.457241	1
Solyc04g016120	SL3.0ch04	6845496	6847496	+	4808	8244	3970	7623	36.837	34.245	-2.59246	1.87521e-05	-5.12548e-15	-3.91086	1	1
Solyc04g016130	SL3.0ch04	6869606	6871606	-	7261	5512	7997	6981	56.846	53.392	-3.45483	9.93224e-09	0.0469321	5.40407	0.861382	1
Solyc04g016150	SL3.0ch04	6893419	6895419	-	550	3584	217	2574	13.304	7.775	-5.52931	5.20675e-13	-5.12548e-15	-3.83179	1	1
Solyc04g016370	SL3.0ch04	7185205	7187205	-	4360	3653	4196	4452	54.412	48.52	-5.89169	5.4777e-14	-0.237601	4.70559	0.433187	1
Solyc04g016460	SL3.0ch04	7294035	7296035	+	2431	5744	2086	6700	29.737	23.742	-5.99469	2.98102e-18	5.22602	2.32744	0.0047274	0.179786
Solyc04g016480	SL3.0ch04	7309130	7311130	-	2172	10009	1741	8536	17.831	16.941	-0.890307	0.0386251	-1.32819	1.89829	0.0359703	0.582167
Solyc04g016530	SL3.0ch04	7364173	7366173	-	551	5461	469	6135	9.165	7.102	-2.06325	2.00036e-05	-0.254438	3.84388	0.448671	1
Solyc04g017750	SL3.0ch04	7968266	7970266	-	7139	9371	7536	10643	43.24	41.454	-1.78603	0.000526025	-0.192703	4.53006	0.513001	1
Solyc04g017753	SL3.0ch04	7990245	7992245	-	4130	4629	3236	3949	47.152	45.038	-2.11323	0.0046742	-2.74434	-3.83322	0.672124	1
Solyc04g017770	SL3.0ch04	8084486	8086486	+	2393	5205	2658	6223	31.495	29.929	-1.56607	0.015744	-5.12548e-15	-3.91086	1	1
Solyc04g017940	SL3.0ch04	8717776	8719776	-	2392	4496	2543	5072	34.727	33.395	-1.33245	0.0435321	-5.12548e-15	-3.91086	1	1
Solyc04g018020	SL3.0ch04	8996972	8998972	+	1822	4821	1357	3865	27.427	25.986	-1.44115	0.0381765	-5.12548e-15	-3.91086	1	1
Solyc04g018030	SL3.0ch04	8997434	8999434	+	1379	3896	712	2391	26.142	22.946	-3.19664	0.000722595	-5.12548e-15	-3.91086	1	1
Solyc04g018050	SL3.0ch04	9126522	9128522	+	254	1851	168	1972	12.067	7.85	-4.21604	4.2256e-06	-5.12548e-15	-3.91086	1	1
Solyc04g018130	SL3.0ch04	9610481	9612481	-	1698	4682	1249	3756	26.614	24.955	-1.65938	0.0227849	-0.315031	0.507165	0.662927	1
Solyc04g018147	SL3.0ch04	9730549	9732549	+	2480	5131	1819	4527	32.584	28.664	-3.92069	6.00185e-07	-5.12548e-15	-3.91086	1	1
Solyc04g018170	SL3.0ch04	9785809	9787809	-	1402	6977	481	3849	16.732	11.109	-5.62376	1.79069e-17	-1.09265	-3.04523	0.647616	1
Solyc04g018177	SL3.0ch04	10291029	10293029	+	2480	8959	1755	8090	21.68	17.826	-3.85391	3.38263e-12	-5.12548e-15	-3.7556	1	1
Solyc04g018190	SL3.0ch04	10328373	10330373	-	1504	3054	1541	3598	32.997	29.986	-3.01055	0.000966623	-5.12548e-15	-3.62433	1	1
Solyc04g018250	SL3.0ch04	11168450	11170450	-	3219	10677	2935	10211	23.165	22.326	-0.838757	0.0473717	-5.12548e-15	-3.65009	1	1
Solyc04g040130	SL3.0ch04	12034163	12036163	+	3198	10363	3094	11005	23.582	21.945	-1.63751	0.000785107	3.04676	3.69339	0.0445089	0.648219
Solyc04g040095	SL3.0ch04	12248007	12250007	+	2931	6854	3481	8564	29.954	28.9	-1.05405	0.0432182	-5.12548e-15	-3.91086	1	1
Solyc04g040050	SL3.0ch04	12248096	12250096	+	2901	6987	3372	8684	29.339	27.969	-1.36912	0.0138992	-5.12548e-15	-3.91086	1	1
Solyc04g039965	SL3.0ch04	12322662	12324662	-	6599	8524	7398	10072	43.636	42.347	-1.28864	0.0106245	1.23827	-3.72609	0.788853	1
Solyc04g039945	SL3.0ch04	12372895	12374895	+	143	1329	28	456	9.715	5.785	-3.92955	0.00413771	-0.63487	-0.331442	0.31744	1
Solyc04g039930	SL3.0ch04	12378305	12380305	+	2037	3138	1469	2442	39.362	37.561	-1.80159	0.0391296	-0.747524	-1.35141	0.535361	1
Solyc04g039920	SL3.0ch04	12383000	12385000	+	6772	8593	5808	7979	44.074	42.127	-1.94755	0.000545617	-5.12548e-15	-3.52188	1	1
Solyc04g028560	SL3.0ch04	14827959	14829959	+	2297	5493	2233	6368	29.487	25.962	-3.52442	5.17421e-07	-0.125014	3.34941	0.735716	1
Solyc04g026290	SL3.0ch04	17327626	17329626	-	2783	5725	2951	6823	32.71	30.192	-2.51804	0.000195397	-5.12548e-15	-3.91086	1	1
Solyc04g026080	SL3.0ch04	19019052	19021052	-	2372	3282	1851	2912	41.953	38.862	-3.09054	0.000946421	-5.12548e-15	-3.83209	1	1
Solyc04g026057	SL3.0ch04	19116129	19118129	-	7353	7049	6912	7345	51.055	48.481	-2.57396	1.17145e-05	-5.12548e-15	-3.91086	1	1
Solyc04g026023	SL3.0ch04	19794170	19796170	+	2530	4746	2390	4820	34.772	33.148	-1.62345	0.0205072	-1.93379	-3.87151	1	1
Solyc04g025993	SL3.0ch04	20041888	20043888	-	3448	8583	3714	10130	28.659	26.828	-1.83179	0.000708534	-5.12548e-15	-3.8387	1	1
Solyc04g025740	SL3.0ch04	21172662	21174662	+	5957	3739	6978	5006	61.438	58.228	-3.21007	1.58678e-06	-5.12548e-15	-3.91086	1	1
Solyc04g025710	SL3.0ch04	21252965	21254965	-	3666	6222	3734	6853	37.075	35.27	-1.80557	0.00432238	-5.12548e-15	-3.91086	1	1
Solyc04g025715	SL3.0ch04	21257782	21259782	+	4971	9319	4895	10494	34.787	31.808	-2.97813	5.94026e-08	0.0682584	4.46926	0.814388	1
Solyc04g025570	SL3.0ch04	21823449	21825449	-	3543	9849	3092	9191	26.456	25.173	-1.28309	0.0104606	5.19044	-3.19564	0.0796733	0.827214
Solyc04g025560	SL3.0ch04	21822144	21824144	+	3423	9900	2855	9573	25.692	22.972	-2.72009	4.05318e-07	-5.12548e-15	-3.86959	1	1
Solyc04g025380	SL3.0ch04	23929367	23931367	+	3924	8368	3081	7490	31.923	29.146	-2.77743	5.19667e-06	-5.12548e-15	-3.91086	1	1
Solyc04g025370	SL3.0ch04	23966224	23968224	-	4204	5863	4809	7106	41.76	40.361	-1.39932	0.0187755	-5.12548e-15	-3.91086	1	1
Solyc04g025180	SL3.0ch04	25266037	25268037	+	2986	6208	2853	6783	32.478	29.608	-2.86998	1.74246e-05	-0.247302	3.03424	0.589153	1
[truncated: 3,640 more rows]

## Sheet: PHYA_hypo_DMP_IG_All
Supplementary Table 12. Total differentially methylated promoters (DMPs) in immature green fruits in all mC contexts
ID	chr	from	to	strand	met_WT	unmet_WT	met_PHYA	unmet_PHYA	X.met_WT	X.met_PHYA	X.diff_PHYA.ctrl	FDR_diff_PHYA.WT	logFC_PHYA	logCPM_PHYA	PValue_PHYA	padj_PHYA
Solyc00g005094	SL3.0ch00	1146952	1148952	-	6879	8876	5429	7631	43.662	41.57	-2.09265	0.000243936	0.0277807	5.51214	0.962023	1
Solyc00g005287	SL3.0ch00	2357974	2359974	-	2187	8048	1535	6268	21.368	19.672	-1.69593	0.00298319	4.34896	-3.3494	0.122502	1
Solyc00g005430	SL3.0ch00	2358571	2360571	-	1983	6874	1389	5436	22.389	20.352	-2.03742	0.00124209	4.45167	-3.65101	0.269915	1
Solyc00g006090	SL3.0ch00	4007717	4009717	+	950	1225	383	569	43.678	40.231	-3.44707	0.0347492	0	-3.91086	1	1
Solyc00g006480	SL3.0ch00	4232311	4234311	+	502	2258	370	2123	18.188	14.842	-3.34685	0.000757017	0	-3.91086	1	1
Solyc00g006500	SL3.0ch00	4371312	4373312	-	59	65	45	105	47.581	30	-17.5806	0.0022411	0	-3.91086	1	1
Solyc00g006520	SL3.0ch00	4370980	4372980	+	59	65	45	105	47.581	30	-17.5806	0.0022411	0	-3.91086	1	1
Solyc00g006680	SL3.0ch00	5629656	5631656	+	64902	60890	19688	18921	51.595	50.993	-0.601404	0.0186084	0.0840125	-3.31508	1	1
Solyc00g006683	SL3.0ch00	5682337	5684337	-	144	67	1014	720	68.246	58.478	-9.76894	0.00402345	0	-3.91086	1	1
Solyc00g006820	SL3.0ch00	5819900	5821900	+	4669	10244	4053	9409	31.308	30.107	-1.20129	0.0144686	-0.509874	1.61308	0.550245	1
Solyc00g006830	SL3.0ch00	5838523	5840523	-	4374	5602	3780	5162	43.845	42.272	-1.57281	0.0145094	0.0549426	5.24288	0.839267	1
Solyc00g006840	SL3.0ch00	6186900	6188900	+	989	3513	736	2965	21.968	19.887	-2.0815	0.0111324	0	-3.91086	1	1
Solyc00g007925	SL3.0ch00	6898252	6900252	-	849	723	1051	1007	54.008	51.069	-2.93863	0.0364259	0	-3.91086	1	1
Solyc00g011150	SL3.0ch00	9131088	9133088	-	286052	317427	83079	95386	47.4	46.552	-0.848505	3.94301e-10	1.56956	4.0957	0.00726466	0.402232
Solyc00g011160	SL3.0ch00	9129189	9131189	+	948508	192234	238432	49690	83.148	82.754	-0.394503	4.68927e-07	1.75312	5.13575	0.00352554	0.253725
Solyc00g014390	SL3.0ch00	10022073	10024073	+	566	2062	515	2183	21.537	19.088	-2.44908	0.0132609	0	-3.91086	1	1
Solyc00g014790	SL3.0ch00	10108906	10110906	+	2094	111767	1245	71150	1.839	1.72	-0.119352	0.0276612	-3.28954	-3.4161	0.190553	1
Solyc00g019610	SL3.0ch00	10805934	10807934	+	859	1922	556	1432	30.888	27.968	-2.92036	0.0152631	0	-3.91086	1	1
Solyc00g020000	SL3.0ch00	10850676	10852676	+	3401	155362	2020	105142	2.142	1.885	-0.25719	3.40352e-06	2.62693	-3.50132	0.602031	1
Solyc00g022103	SL3.0ch00	11060109	11062109	-	3108	200634	1900	129089	1.525	1.451	-0.0749552	0.0369812	0.823862	-0.130366	0.402702	1
Solyc00g026907	SL3.0ch00	11445381	11447381	-	618	5351	446	5061	10.353	8.099	-2.25471	2.48706e-05	0	-3.91086	1	1
Solyc00g029190	SL3.0ch00	11564413	11566413	+	1001	1051	695	914	48.782	43.195	-5.58715	0.000530635	0	-3.91086	1	1
Solyc00g030510	SL3.0ch00	11649548	11651548	+	1776	7909	1505	7516	18.338	16.683	-1.65434	0.00176984	0	-3.91086	1	1
Solyc00g048510	SL3.0ch00	12614041	12616041	+	9190	15703	8313	15515	36.918	34.888	-2.03048	2.72345e-06	0.744273	2.93276	0.344178	1
Solyc00g059505	SL3.0ch00	13155840	13157840	-	1243	4586	854	3438	21.324	19.897	-1.42693	0.0369097	0	-3.91086	1	1
Solyc00g066150	SL3.0ch00	13435324	13437324	-	5824	9098	4820	8008	39.03	37.574	-1.45556	0.00693311	0	-3.91086	1	1
Solyc00g068980	SL3.0ch00	13553285	13555285	+	301330	211000	90986	65424	58.816	58.171	-0.644135	5.12476e-06	1.97808	2.42878	0.00689965	0.38864
Solyc00g071180	SL3.0ch00	13651920	13653920	-	7097	13891	5287	10991	33.815	32.479	-1.33514	0.00374398	0	-0.604256	1	1
Solyc00g094520	SL3.0ch00	14585676	14587676	-	3683	174161	2369	131104	2.071	1.775	-0.296025	3.75909e-09	1.80124	-2.96074	1	1
Solyc00g094530	SL3.0ch00	14586705	14588705	-	3998	187385	2726	140022	2.089	1.91	-0.179346	0.000179734	3.5425	-2.86231	0.334099	1
Solyc00g099580	SL3.0ch00	14780831	14782831	-	5330	8644	4389	8034	38.142	35.33	-2.81263	2.02835e-06	0.858325	-3.48102	0.809078	1
Solyc00g110070	SL3.0ch00	15150659	15152659	+	62	11	220	152	84.932	59.14	-25.7917	1.3072e-05	0	-3.91086	1	1
Solyc00g112190	SL3.0ch00	15230377	15232377	-	4151	10528	3272	8875	28.278	26.937	-1.3418	0.00760722	1.78043	-3.55781	1	1
Solyc00g114550	SL3.0ch00	15306474	15308474	+	1011	1074	501	639	48.489	43.947	-4.54184	0.00767966	0	-3.91086	1	1
Solyc00g117450	SL3.0ch00	15410790	15412790	-	3222	8614	2647	7861	27.222	25.19	-2.0317	0.000375557	0	-3.91086	1	1
Solyc00g117653	SL3.0ch00	15444881	15446881	-	2068	93019	1041	57184	2.175	1.788	-0.386959	1.58486e-07	2.65328	-3.83525	0.58676	1
Solyc00g118680	SL3.0ch00	15446465	15448465	-	2960	71956	1385	44378	3.951	3.026	-0.924629	7.55448e-17	-1.71146	-3.2667	0.583103	1
Solyc00g118690	SL3.0ch00	15444367	15446367	+	1735	81972	922	49747	2.073	1.82	-0.253053	0.000749864	1.89869	-3.83472	1	1
Solyc00g121230	SL3.0ch00	15526756	15528756	-	2381	7682	1923	8038	23.661	19.305	-4.35565	1.19382e-13	0	-3.91086	1	1
Solyc00g125980	SL3.0ch00	15682094	15684094	+	2496	67115	1520	44400	3.586	3.31	-0.275536	0.00660612	0	-3.91086	1	1
Solyc00g125990	SL3.0ch00	15682094	15684094	+	2496	67115	1520	44400	3.586	3.31	-0.275536	0.00660612	-0.411468	-0.33344	0.679086	1
Solyc00g127545	SL3.0ch00	15727898	15729898	+	2223	9029	1922	8664	19.756	18.156	-1.60043	0.00156057	0	-3.91086	1	1
Solyc00g134820	SL3.0ch00	15965396	15967396	+	2518	5229	1796	4037	32.503	30.79	-1.71257	0.0171101	0	-3.91086	1	1
Solyc00g134830	SL3.0ch00	15966197	15968197	+	868	2108	635	2031	29.167	23.818	-5.34821	5.11157e-06	0	-3.87283	1	1
Solyc00g171710	SL3.0ch00	17092060	17094060	+	5784	9487	4075	7947	37.876	33.896	-3.97952	1.76167e-11	0	-3.91086	1	1
Solyc00g174345	SL3.0ch00	17183580	17185580	+	2142	1329	4236	2867	61.711	59.637	-2.07455	0.0200485	0	-3.91086	1	1
Solyc00g188857	SL3.0ch00	17772479	17774479	+	3097	10972	2541	9955	22.013	20.335	-1.67843	0.0005352	0.12744	4.88727	0.73215	1
Solyc00g226760	SL3.0ch00	18575849	18577849	+	221	419	855	3131	34.531	21.45	-13.0812	4.25781e-12	-5.5876	-3.33246	0.0336963	0.859052
Solyc00g233480	SL3.0ch00	18745469	18747469	-	3278	8906	2579	7720	26.904	25.041	-1.86287	0.000921369	1.18533	-0.735922	0.392564	1
Solyc00g247305	SL3.0ch00	19115642	19117642	-	7120	10046	6526	9690	41.477	40.244	-1.23314	0.0112355	0	-3.86745	1	1
Solyc00g249900	SL3.0ch00	19145298	19147298	+	1867	1855	1848	1988	50.161	48.175	-1.98602	0.0377344	0.779381	-2.9852	0.691644	1
Solyc00g280110	SL3.0ch00	19855053	19857053	-	3622	3511	3222	3326	50.778	49.206	-1.57221	0.0306161	3.03458	-2.64721	0.0974665	1
Solyc00g311230	SL3.0ch00	20540213	20542213	+	1346	1635	1676	2415	45.153	40.968	-4.18465	0.000301122	0	-3.91086	1	1
Solyc01g005090	SL3.0ch01	89176	91176	-	1602	4311	1334	3878	27.093	25.595	-1.49806	0.0333656	0	-3.91086	1	1
Solyc01g005100	SL3.0ch01	97452	99452	-	1372	3833	1073	3375	26.359	24.123	-2.23607	0.00631325	0.168558	4.06151	0.632906	1
Solyc01g005110	SL3.0ch01	97355	99355	+	1358	3462	1070	2985	28.174	26.387	-1.7871	0.0286204	0.192651	4.14212	0.589315	1
Solyc01g005120	SL3.0ch01	107325	109325	-	1410	8423	1209	8722	14.339	12.174	-2.16547	6.53205e-06	-0.603943	3.07059	0.268827	1
Solyc01g005130	SL3.0ch01	122769	124769	+	441	3234	310	3007	12	9.346	-2.65421	0.000246756	-0.106701	4.23302	0.775325	1
Solyc01g005150	SL3.0ch01	134364	136364	-	1932	6963	1152	6150	21.72	15.776	-5.94357	2.20181e-21	-1.13579	-0.622394	0.140899	1
Solyc01g005200	SL3.0ch01	152262	154262	+	263	5322	106	3643	4.709	2.827	-1.88162	3.29979e-06	-2.26615	-3.05079	0.260619	1
Solyc01g005210	SL3.0ch01	163331	165331	+	1224	8779	976	7938	12.236	10.949	-1.28726	0.00330949	-0.396712	6.30086	0.320442	1
Solyc01g005340	SL3.0ch01	245710	247710	-	3571	11169	2841	10001	24.227	22.123	-2.10387	2.96568e-05	-0.0880429	5.00912	0.793856	1
Solyc01g005360	SL3.0ch01	255331	257331	+	1427	8977	1281	8637	13.716	12.916	-0.799968	0.0417434	0	-3.91086	1	1
Solyc01g005370	SL3.0ch01	257883	259883	+	3510	8445	2700	7387	29.36	26.767	-2.59297	1.67324e-05	0.483299	4.67631	0.157894	1
Solyc01g005380	SL3.0ch01	259020	261020	+	1460	8805	1078	7820	14.223	12.115	-2.10801	1.39653e-05	1.03402	-1.76595	0.377987	1
Solyc01g005385	SL3.0ch01	259135	261135	+	1474	8471	1033	7423	14.822	12.216	-2.60534	2.84118e-07	0	-3.79823	1	1
Solyc01g005420	SL3.0ch01	294380	296380	-	3646	5350	3681	5808	40.529	38.792	-1.73684	0.00827667	-0.293219	3.03024	0.721859	1
Solyc01g005430	SL3.0ch01	296679	298679	+	198	4379	161	4856	4.326	3.209	-1.11689	0.0024263	0.114441	4.51549	0.785158	1
Solyc01g005440	SL3.0ch01	307089	309089	+	1017	6595	679	5376	13.36	11.214	-2.14661	0.000107467	0.067013	7.13767	0.8502	1
Solyc01g005470	SL3.0ch01	324960	326960	-	1653	12226	1296	10619	11.91	10.877	-1.03303	0.00512565	0.728377	2.29653	0.519617	1
Solyc01g005510	SL3.0ch01	348880	350880	-	3752	4976	2884	5025	42.988	36.465	-6.5233	2.56934e-17	4.4019	-3.29228	0.199436	1
Solyc01g005520	SL3.0ch01	348023	350023	+	3810	5361	2832	4741	41.544	37.396	-4.14799	5.23215e-08	-0.859494	4.449	0.0154269	0.597821
Solyc01g005560	SL3.0ch01	392352	394352	+	775	9413	577	8145	7.607	6.615	-0.991533	0.00457034	-0.519329	8.1311	0.0837507	1
Solyc01g005570	SL3.0ch01	403017	405017	-	1283	3527	757	2744	26.674	21.622	-5.0512	1.25239e-07	-0.00887121	4.56945	0.978368	1
Solyc01g005630	SL3.0ch01	442810	444810	+	7777	11247	6775	10816	40.88	38.514	-2.36593	3.40646e-06	0	-3.91086	1	1
Solyc01g005640	SL3.0ch01	447851	449851	+	722	7747	451	5798	8.525	7.217	-1.30805	0.00217002	0.418122	5.15533	0.154045	1
Solyc01g005730	SL3.0ch01	488688	490688	+	1050	3971	714	3584	20.912	16.612	-4.29979	1.33175e-07	0.0106423	7.85887	0.983638	1
Solyc01g005820	SL3.0ch01	533571	535571	+	2186	5063	1617	4012	30.156	28.726	-1.42964	0.035792	0.0740488	7.47843	0.802009	1
Solyc01g005930	SL3.0ch01	604105	606105	+	9002	9144	7522	8249	49.609	47.695	-1.91359	0.000299142	0.0346687	5.0411	0.909652	1
Solyc01g005940	SL3.0ch01	612494	614494	+	5847	11727	4809	10370	33.271	31.682	-1.58881	0.00134924	3.59439	-3.5614	0.3824	1
Solyc01g005960	SL3.0ch01	623152	625152	+	5655	10386	2861	5865	35.253	32.787	-2.46634	6.79952e-05	-0.00414021	5.87646	0.988405	1
Solyc01g005970	SL3.0ch01	640038	642038	+	3097	10896	2311	9969	22.132	18.819	-3.31328	5.29066e-11	0.179813	2.72944	0.654338	1
Solyc01g005990	SL3.0ch01	655153	657153	-	3210	7195	2416	6229	30.851	27.947	-2.90376	1.01248e-05	-0.0950155	1.02438	0.916571	1
Solyc01g006090	SL3.0ch01	751736	753736	+	4815	7970	4136	7220	37.661	36.421	-1.24005	0.022023	1.00439	2.58471	0.0744231	1
Solyc01g006170	SL3.0ch01	811277	813277	-	4447	4997	3511	4635	47.088	43.101	-3.98719	1.3011e-07	0.727463	4.24442	0.0673227	1
Solyc01g006180	SL3.0ch01	818879	820879	-	502	2885	338	2437	14.821	12.18	-2.6412	0.00164759	0.485914	3.451	0.182652	1
Solyc01g006195	SL3.0ch01	823637	825637	-	176	2533	130	2434	6.497	5.07	-1.42666	0.0143254	-0.446059	1.99082	0.394718	1
Solyc01g006290	SL3.0ch01	882366	884366	+	4910	9908	3344	7987	33.135	29.512	-3.62342	5.79801e-10	0	2.82469	1	1
Solyc01g006360	SL3.0ch01	981297	983297	-	1339	8183	1046	7938	14.062	11.643	-2.41925	9.16698e-07	0.351399	4.04951	0.597792	1
Solyc01g006420	SL3.0ch01	1027975	1029975	+	8086	11044	6671	9706	42.269	40.734	-1.53473	0.00203352	0	-3.91086	1	1
Solyc01g006480	SL3.0ch01	1071745	1073745	+	5190	12274	4521	11457	29.718	28.295	-1.42312	0.0024199	0.103792	3.8159	0.747753	1
Solyc01g006520	SL3.0ch01	1097091	1099091	+	4210	8018	3491	7339	34.429	32.235	-2.19465	0.000280418	-0.269576	1.55837	0.723033	1
Solyc01g006565	SL3.0ch01	1139192	1141192	-	2951	3592	2395	3131	45.102	43.341	-1.76106	0.0249179	-5.83523	-3.20204	0.100185	1
Solyc01g006575	SL3.0ch01	1172601	1174601	+	2745	7481	1880	5524	26.843	25.392	-1.45166	0.0153787	0	-3.91086	1	1
Solyc01g006700	SL3.0ch01	1285021	1287021	-	2866	5009	2604	4833	36.394	35.014	-1.37953	0.0345135	-0.0261897	5.26629	0.923298	1
Solyc01g006760	SL3.0ch01	1350019	1352019	-	1434	4574	1084	4165	23.868	20.652	-3.21662	3.40681e-05	0	-3.91086	1	1
Solyc01g006820	SL3.0ch01	1391134	1393134	-	269	3112	196	3935	7.956	4.745	-3.21161	1.35834e-08	0.293821	0.0936743	0.725738	1
Solyc01g006830	SL3.0ch01	1404011	1406011	-	3773	10604	3474	10210	26.243	25.387	-0.855992	0.0445566	-0.0823912	6.00255	0.767457	1
Solyc01g006850	SL3.0ch01	1415006	1417006	+	6015	8939	5383	8370	40.223	39.141	-1.0828	0.0282146	0.256101	1.02702	0.626346	1
Solyc01g006900	SL3.0ch01	1477626	1479626	-	6284	9518	5908	9474	39.767	38.409	-1.35859	0.007435	0.335439	8.42115	0.296162	1
Solyc01g006940	SL3.0ch01	1509617	1511617	+	2344	2531	2587	3026	48.082	46.089	-1.99262	0.020574	-0.30791	5.15815	0.311468	1
Solyc01g007260	SL3.0ch01	1823385	1825385	-	6800	8965	6174	8758	43.134	41.347	-1.78608	0.00097024	-0.408787	0.0845083	0.615356	1
Solyc01g007800	SL3.0ch01	1888876	1890876	+	5689	10989	4597	9885	34.111	31.743	-2.36795	7.73162e-06	2.35089	-3.65929	0.522426	1
Solyc01g007830	SL3.0ch01	1938784	1940784	-	3371	9023	3176	8957	27.199	26.177	-1.0221	0.0323217	-0.117487	-2.44535	1	1
Solyc01g007880	SL3.0ch01	1991492	1993492	-	6300	8953	6044	9369	41.303	39.214	-2.0897	0.000135294	0.0458189	3.88532	0.90269	1
Solyc01g007890	SL3.0ch01	1998989	2000989	-	1391	13101	793	10459	9.598	7.048	-2.55076	4.62835e-13	-0.0385082	0.617487	0.970394	1
Solyc01g007895	SL3.0ch01	2021766	2023766	-	1652	8387	1311	7896	16.456	14.239	-2.21666	1.63271e-05	-1.08112	-2.088	0.542971	1
Solyc01g008040	SL3.0ch01	2133305	2135305	-	1785	8834	1543	8156	16.809	15.909	-0.900636	0.0376468	2.93019	2.50448	0.000371691	0.0503988
Solyc01g008050	SL3.0ch01	2132652	2134652	+	1279	7143	849	5775	15.186	12.817	-2.36939	2.59421e-05	6.1815	-1.17019	0.0105531	0.488029
Solyc01g008060	SL3.0ch01	2136396	2138396	+	8557	9532	7180	9369	47.305	43.386	-3.91868	4.7667e-13	0.0153735	5.47341	0.954545	1
Solyc01g008080	SL3.0ch01	2157582	2159582	-	5316	9282	4598	8650	36.416	34.707	-1.70882	0.00173401	0.081211	6.32182	0.825233	1
Solyc01g008190	SL3.0ch01	2275298	2277298	+	7039	9660	6441	9717	42.152	39.863	-2.28962	1.94564e-05	0.181222	2.24454	0.704827	1
Solyc01g008420	SL3.0ch01	2437381	2439381	+	6282	12579	4711	9946	33.307	32.142	-1.16518	0.012126	-0.517559	2.91831	0.233032	1
Solyc01g008490	SL3.0ch01	2514234	2516234	-	67	567	124	1508	10.568	7.598	-2.96978	0.0139	-0.0862768	3.65429	0.806691	1
Solyc01g008497	SL3.0ch01	2548843	2550843	-	9311	9163	8096	8455	50.401	48.915	-1.48509	0.0031002	3.64896	-0.116818	0.0546759	1
Solyc01g008500	SL3.0ch01	2543420	2545420	+	68	337	76	652	16.79	10.44	-6.35056	0.00163961	0	-3.91086	1	1
Solyc01g008510	SL3.0ch01	2550948	2552948	+	7157	8838	6868	8808	44.745	43.812	-0.933036	0.0424489	0.674952	3.11352	0.35448	1
Solyc01g008680	SL3.0ch01	2674333	2676333	-	2806	8480	1919	6394	24.863	23.084	-1.77834	0.00232035	-0.950682	0.735163	0.20734	1
Solyc01g008700	SL3.0ch01	2685791	2687791	-	5495	9074	5148	9732	37.717	34.597	-3.1203	2.90986e-08	0.533562	6.063	0.192742	1
Solyc01g008820	SL3.0ch01	2776260	2778260	+	5469	9137	4175	7371	37.444	36.16	-1.28381	0.0161468	0.382632	5.7268	0.177676	1
Solyc01g008880	SL3.0ch01	2835494	2837494	-	3137	11892	2688	11345	20.873	19.155	-1.71813	0.000178496	0	-3.50504	1	1
Solyc01g008940	SL3.0ch01	2890927	2892927	+	1124	3914	688	3394	22.31	16.854	-5.45596	1.17726e-10	-5.26675	-2.67371	0.000290427	0.0422275
Solyc01g008980	SL3.0ch01	2927000	2929000	+	1306	5549	1122	5804	19.052	16.2	-2.85196	9.55054e-06	0.0696581	0.849862	0.914401	1
Solyc01g008977	SL3.0ch01	2927532	2929532	+	1634	3583	1371	3384	31.321	28.833	-2.48787	0.00393465	-0.234671	-1.02321	0.809663	1
Solyc01g009000	SL3.0ch01	2944501	2946501	+	292	3360	241	3605	7.996	6.266	-1.72937	0.00226794	0.00686668	5.36564	0.981775	1
Solyc01g009020	SL3.0ch01	2958478	2960478	-	7069	7692	7492	8473	47.89	46.928	-0.962055	0.0410862	-0.127414	7.18973	0.681322	1
Solyc01g009120	SL3.0ch01	3077562	3079562	-	1322	2683	1074	2538	33.009	29.734	-3.27452	0.00129608	0.216635	4.0662	0.503179	1
Solyc01g009190	SL3.0ch01	3168921	3170921	+	4233	3717	4598	4343	53.245	51.426	-1.81927	0.00928893	-3.92221	-3.34744	0.411974	1
Solyc01g009220	SL3.0ch01	3181620	3183620	-	5602	9116	3939	8274	38.062	32.253	-5.80972	1.18376e-22	-0.357219	-1.7345	0.778426	1
Solyc01g009260	SL3.0ch01	3220496	3222496	+	4419	9674	3538	8469	31.356	29.466	-1.88985	0.000595522	-0.963133	-3.23619	1	1
Solyc01g009270	SL3.0ch01	3227063	3229063	-	2762	8996	3069	10486	23.49	22.641	-0.849298	0.0489738	0.63186	-2.76527	1	1
Solyc01g009280	SL3.0ch01	3253968	3255968	-	886	9102	761	8781	8.871	7.975	-0.895378	0.0124387	0.0558237	5.55819	0.862974	1
Solyc01g009480	SL3.0ch01	3640739	3642739	-	4503	10014	4031	10676	31.019	27.409	-3.61009	1.87971e-11	0	-3.86959	1	1
Solyc01g009550	SL3.0ch01	3741980	3743980	+	11247	8699	9856	9061	56.387	52.101	-4.28596	6.08418e-17	0	-3.91086	1	1
Solyc01g009610	SL3.0ch01	3780779	3782779	-	5289	9929	4253	8939	34.755	32.239	-2.51566	6.5219e-06	0.0340493	4.24826	0.92284	1
Solyc01g009630	SL3.0ch01	3797042	3799042	+	3318	6688	3597	7995	33.16	31.03	-2.13008	0.00053969	-0.381643	4.96516	0.156298	1
Solyc01g009670	SL3.0ch01	3847938	3849938	-	3253	10925	2571	9590	22.944	21.141	-1.80264	0.00029126	-0.264234	0.217826	0.746876	1
Solyc01g009680	SL3.0ch01	3899628	3901628	+	2741	4058	3323	5217	40.315	38.911	-1.40375	0.0351571	0.832226	1.63251	0.233962	1
Solyc01g009715	SL3.0ch01	3934692	3936692	-	1831	8850	1451	7580	17.143	16.067	-1.07571	0.0208315	-0.874201	-3.08051	0.580554	1
Solyc01g009720	SL3.0ch01	3935091	3937091	-	2464	8916	1918	7344	21.652	20.708	-0.943751	0.0441014	0	-3.91086	1	1
Solyc01g009770	SL3.0ch01	4093600	4095600	-	4971	7659	4469	7185	39.359	38.347	-1.01132	0.047119	-0.186862	2.9834	0.720988	1
Solyc01g009890	SL3.0ch01	4356474	4358474	+	4239	7245	4221	7656	36.912	35.539	-1.37295	0.014433	0	-3.91086	1	1
Solyc01g010050	SL3.0ch01	4617914	4619914	+	1021	5732	807	5792	15.119	12.229	-2.89008	1.21972e-06	-0.425003	5.1104	0.171821	1
Solyc01g010220	SL3.0ch01	4937360	4939360	+	1464	4842	1196	4866	23.216	19.729	-3.48652	2.24644e-06	-0.0403201	4.32899	0.917636	1
Solyc01g010290	SL3.0ch01	5026834	5028834	-	150	1414	135	2393	9.591	5.34	-4.2506	3.58986e-07	-0.438718	4.45443	0.164723	1
Solyc01g010360	SL3.0ch01	5114498	5116498	-	2634	6553	980	2669	28.671	26.857	-1.81428	0.0194946	-1.52767	-0.330225	0.154686	1
Solyc01g010390	SL3.0ch01	5197219	5199219	+	4720	8483	4492	8943	35.749	33.435	-2.31439	5.35683e-05	-0.148714	2.58213	0.762938	1
Solyc01g010465	SL3.0ch01	5305229	5307229	+	1960	3489	1863	3568	35.97	34.303	-1.66683	0.0321267	-2.20129	-2.81287	0.191227	1
Solyc01g010508	SL3.0ch01	5448977	5450977	+	1614	3437	1777	4431	31.954	28.624	-3.32971	9.46801e-05	-0.155784	-3.17088	1	1
Solyc01g010525	SL3.0ch01	5482425	5484425	+	492	2829	300	3972	14.815	7.022	-7.79234	2.89763e-27	-1.47047	-3.38419	0.486991	1
Solyc01g010720	SL3.0ch01	5702925	5704925	-	5466	8550	4655	9103	38.998	33.835	-5.16343	1.14082e-18	-2.12743	0.45585	0.0041963	0.283195
Solyc01g010790	SL3.0ch01	5791274	5793274	-	45	1200	16	779	3.614	2.013	-1.60188	0.0212599	0	-3.91086	1	1
Solyc01g010850	SL3.0ch01	6235529	6237529	-	3939	7188	3268	6869	35.4	32.238	-3.16204	1.10158e-06	0	-3.91086	1	1
Solyc01g011200	SL3.0ch01	8080720	8082720	-	188	1397	98	999	11.861	8.933	-2.92774	0.0080723	-0.144818	-0.069901	0.858283	1
Solyc01g011410	SL3.0ch01	8954837	8956837	-	1345	4802	1271	4900	21.881	20.596	-1.28425	0.0366707	3.37092	-3.60371	0.528067	1
Solyc01g011520	SL3.0ch01	9505920	9507920	-	779	1300	932	1792	37.47	34.214	-3.25555	0.0105067	0	-3.91086	1	1
Solyc01g012590	SL3.0ch01	9687827	9689827	-	3737	6728	3588	6820	35.71	34.473	-1.23603	0.0290966	0	-3.91086	1	1
Solyc01g012730	SL3.0ch01	9918301	9920301	-	877	1986	589	1487	30.632	28.372	-2.26034	0.0393662	0	-3.91086	1	1
Solyc01g012760	SL3.0ch01	10016201	10018201	+	1310	3332	1238	3416	28.221	26.601	-1.61982	0.0364092	-1.41425	-3.25971	0.720769	1
Solyc01g013850	SL3.0ch01	10191321	10193321	-	1059	2306	943	2249	31.471	29.543	-1.92842	0.0404157	0	-3.91086	1	1
Solyc01g013990	SL3.0ch01	10717357	10719357	+	2306	11693	1975	10737	16.473	15.537	-0.936104	0.0184327	0	-3.91086	1	1
Solyc01g014060	SL3.0ch01	11083011	11085011	-	715	6968	435	6296	9.306	6.463	-2.84363	4.1265e-10	0	-3.91086	1	1
Solyc01g014070	SL3.0ch01	11089333	11091333	-	6454	7789	4573	5895	45.313	43.686	-1.62797	0.00589562	0	-3.91086	1	1
Solyc01g014075	SL3.0ch01	11163804	11165804	-	3370	5329	2509	4421	38.74	36.205	-2.53518	0.000735893	0	-3.91086	1	1
Solyc01g014220	SL3.0ch01	11795804	11797804	+	3307	4515	3209	4720	42.278	40.472	-1.8065	0.0108615	0.0844074	-3.79591	1	1
Solyc01g014370	SL3.0ch01	12495362	12497362	-	2059	4665	1684	4239	30.622	28.432	-2.19012	0.004082	0	-3.91086	1	1
Solyc01g014375	SL3.0ch01	12645746	12647746	-	5322	9128	4662	8395	36.83	35.705	-1.12546	0.0247808	0.623536	0.367227	0.385297	1
Solyc01g014430	SL3.0ch01	13487179	13489179	+	1757	4137	1284	3338	29.81	27.78	-2.02979	0.0114623	0	-3.91086	1	1
Solyc01g014720	SL3.0ch01	14526812	14528812	+	414	1316	382	1505	23.931	20.244	-3.68686	0.00434122	0	-3.87229	1	1
Solyc01g014725	SL3.0ch01	14609128	14611128	+	738	2828	717	3213	20.695	18.244	-2.45118	0.00423261	0	-3.91086	1	1
Solyc01g015210	SL3.0ch01	17827380	17829380	+	2400	5464	1846	5042	30.519	26.8	-3.71859	6.24243e-07	0	-3.91086	1	1
Solyc01g016360	SL3.0ch01	19004683	19006683	-	255	941	234	1252	21.321	15.747	-5.5741	0.000162506	0.443795	-1.84977	0.816411	1
Solyc01g016400	SL3.0ch01	19415777	19417777	-	122	1288	56	998	8.652	5.313	-3.33939	0.000969857	1.99101	-1.37836	0.546654	1
Solyc01g016450	SL3.0ch01	19725215	19727215	-	3758	9501	3109	8624	28.343	26.498	-1.8451	0.000711137	-3.61683	-3.75958	0.44069	1
Solyc01g016550	SL3.0ch01	20424155	20426155	-	3030	7766	1304	5541	28.066	19.05	-9.01555	1.15093e-41	1.95247	-3.74789	1	1
Solyc01g016740	SL3.0ch01	21885371	21887371	-	3824	6989	3470	6732	35.365	34.013	-1.3519	0.019531	0	-3.91086	1	1
Solyc01g016890	SL3.0ch01	22665080	22667080	+	845	3682	484	2816	18.666	14.667	-3.99912	2.70851e-06	0	-3.91086	1	1
Solyc01g017080	SL3.0ch01	23791343	23793343	-	3596	47963	3128	46608	6.975	6.289	-0.685327	9.69226e-06	0	-3.91086	1	1
Solyc01g017530	SL3.0ch01	23884431	23886431	-	1369	3560	354	1202	27.774	22.751	-5.02375	6.4583e-05	2.70364	-2.1897	0.100486	1
Solyc01g017630	SL3.0ch01	24486176	24488176	+	1187	4488	956	3943	20.916	19.514	-1.40211	0.0345576	0	-3.91086	1	1
Solyc01g017650	SL3.0ch01	24628936	24630936	+	1853	4244	1909	4740	30.392	28.711	-1.68091	0.0188533	0	-3.91086	1	1
Solyc01g017700	SL3.0ch01	24775077	24777077	+	2161	5110	1578	4374	29.721	26.512	-3.20871	3.48536e-05	0	-3.91086	1	1
Solyc01g017710	SL3.0ch01	24811699	24813699	+	2022	6363	2669	8982	24.114	22.908	-1.20659	0.022507	1.55796	-2.4243	0.447025	1
Solyc01g017840	SL3.0ch01	25673524	25675524	+	2868	5759	2632	5591	33.244	32.008	-1.23668	0.0389532	0	-3.91086	1	1
Solyc01g017860	SL3.0ch01	25697710	25699710	+	3749	5202	3681	5396	41.884	40.553	-1.33054	0.0325646	-0.0425136	3.74751	0.905906	1
Solyc01g017950	SL3.0ch01	26465973	26467973	+	1825	3045	2111	4065	37.474	34.181	-3.29363	0.000229797	0	-3.91086	1	1
Solyc01g020150	SL3.0ch01	27720863	27722863	+	421	1523	34	424	21.656	7.424	-14.2328	9.98778e-14	0.698894	-1.53464	0.39672	1
Solyc01g020360	SL3.0ch01	29342396	29344396	-	2614	7689	1421	5580	25.371	20.297	-5.07415	1.6368e-14	0	-3.91086	1	1
Solyc01g020378	SL3.0ch01	29896586	29898586	-	1751	9324	935	7139	15.81	11.58	-4.23	1.35757e-16	-2.56979	-1.23714	0.0902319	1
Solyc01g020400	SL3.0ch01	29896467	29898467	+	1642	9488	936	7406	14.753	11.22	-3.53259	8.61739e-13	0	-3.91086	1	1
Solyc01g021600	SL3.0ch01	31990638	31992638	+	3345	10062	2627	8529	24.95	23.548	-1.40179	0.00587392	-1.53447	-2.21633	0.471945	1
Solyc01g021690	SL3.0ch01	32494590	32496590	+	1332	7112	1061	6239	15.775	14.534	-1.24027	0.0151014	0	-3.91086	1	1
Solyc01g033990	SL3.0ch01	35316300	35318300	+	4125	8370	3658	8081	33.013	31.161	-1.85212	0.00122076	0	-3.91086	1	1
Solyc01g028935	SL3.0ch01	39811652	39813652	+	220	2504	146	2586	8.076	5.344	-2.73229	4.43582e-05	-2.02753	-2.19065	0.221636	1
Solyc01g028860	SL3.0ch01	40989054	40991054	+	6233	11991	6125	12774	34.202	32.409	-1.79303	0.000174552	0.13947	9.02023	0.6261	1
Solyc01g044270	SL3.0ch01	42996916	42998916	+	826	3511	575	3072	19.045	15.766	-3.27904	8.79405e-05	0.257109	4.50661	0.457023	1
Solyc01g044370	SL3.0ch01	43236198	43238198	-	27	510	20	623	5.028	3.11	-1.91751	0.0444901	0.157883	0.913002	0.801141	1
Solyc01g049840	SL3.0ch01	46574317	46576317	-	3172	6979	2183	6295	31.248	25.749	-5.49916	3.49316e-16	-1.8313	-2.13752	0.418097	1
Solyc01g049960	SL3.0ch01	47627525	47629525	-	8436	9656	6154	8094	46.628	43.192	-3.43632	9.85801e-10	-0.114768	5.45723	0.663992	1
Solyc01g050050	SL3.0ch01	48281490	48283490	+	1333	4598	1133	4518	22.475	20.05	-2.42558	0.000899588	0	-3.91086	1	1
Solyc01g056250	SL3.0ch01	52679581	52681581	-	1442	7301	1202	7233	16.493	14.25	-2.24305	3.69383e-05	0	-3.91086	1	1
Solyc01g056310	SL3.0ch01	53284166	53286166	+	2218	8405	1649	7383	20.879	18.257	-2.62192	3.52845e-06	0	-3.91086	1	1
Solyc01g056625	SL3.0ch01	55017417	55019417	+	182	928	25	342	16.396	6.812	-9.58441	1.38107e-06	0.137213	3.55728	0.668356	1
Solyc01g056850	SL3.0ch01	56987295	56989295	-	2598	14190	1686	12127	15.475	12.206	-3.26945	4.37714e-16	-0.997032	4.8358	0.185268	1
Solyc01g056960	SL3.0ch01	57808965	57810965	+	2681	5718	2439	5595	31.92	30.358	-1.56199	0.0151785	0	-3.91086	1	1
Solyc01g057330	SL3.0ch01	60490094	60492094	+	873	7481	595	7936	10.45	6.975	-3.47552	2.29194e-15	-0.573199	-3.21283	1	1
Solyc01g057340	SL3.0ch01	60508172	60510172	-	1621	3541	2059	4993	31.403	29.197	-2.20517	0.00480192	-0.11646	3.33378	0.741655	1
Solyc01g057473	SL3.0ch01	61022051	61024051	+	121	4060	57	2801	2.894	1.994	-0.899643	0.0102032	-0.174738	2.51189	0.670367	1
Solyc01g057480	SL3.0ch01	61024567	61026567	+	596	2914	344	2477	16.98	12.194	-4.7858	9.77234e-08	-1.80697	-3.37859	1	1
Solyc01g057477	SL3.0ch01	61044362	61046362	+	4406	8076	3624	7027	35.299	34.025	-1.27386	0.0204629	0.786692	1.17835	0.115474	1
Solyc01g057490	SL3.0ch01	61051966	61053966	+	900	2006	858	3036	30.97	22.034	-8.93651	3.16119e-16	0.732103	1.36957	0.175101	1
Solyc01g057610	SL3.0ch01	62839878	62841878	+	4733	7203	3649	6332	39.653	36.559	-3.09369	2.45085e-06	0	-3.91086	1	1
Solyc01g057640	SL3.0ch01	63038158	63040158	+	3854	9294	2859	7705	29.312	27.064	-2.24883	9.71498e-05	0	-3.91086	1	1
Solyc01g057680	SL3.0ch01	63458067	63460067	+	3044	5616	2417	4989	35.15	32.636	-2.51441	0.000527351	2.4696	0.441378	0.0404619	0.927837
Solyc01g057910	SL3.0ch01	64316122	64318122	+	3078	9457	2251	7353	24.555	23.438	-1.11709	0.0255494	0.55194	2.9657	0.155569	1
Solyc01g057920	SL3.0ch01	64503173	64505173	-	1482	11001	1021	10454	11.872	8.898	-2.97454	9.47995e-14	0	-3.91086	1	1
Solyc01g057960	SL3.0ch01	64630623	64632623	+	435	5801	192	4490	6.976	4.101	-2.87481	1.40874e-10	0	-3.76338	1	1
Solyc01g058040	SL3.0ch01	64965082	64967082	-	1249	10731	714	9021	10.426	7.334	-3.09135	4.46602e-15	0	-3.91086	1	1
Solyc01g058080	SL3.0ch01	65008956	65010956	-	416	1619	304	1754	20.442	14.772	-5.67064	1.70568e-06	0	-3.91086	1	1
Solyc01g058140	SL3.0ch01	65422821	65424821	+	4164	7990	2847	5811	34.26	32.883	-1.37744	0.0185415	0.00270302	5.66239	0.992934	1
Solyc01g058170	SL3.0ch01	65491261	65493261	+	102	1381	29	579	6.878	4.77	-2.10821	0.0334965	-0.626477	2.0902	0.223474	1
Solyc01g058210	SL3.0ch01	65559641	65561641	-	2198	6158	1956	5850	26.304	25.058	-1.2468	0.032538	-7.1456	-1.41099	1.30757e-06	0.000543829
Solyc01g058260	SL3.0ch01	65871282	65873282	-	9258	10341	8694	10145	47.237	46.149	-1.08816	0.0158718	-0.13695	7.40688	0.667702	1
Solyc01g058323	SL3.0ch01	66066309	66068309	+	5380	8598	4526	7695	38.489	37.035	-1.45444	0.0081364	0	-3.91086	1	1
Solyc01g058360	SL3.0ch01	66327542	66329542	+	18830	21343	6939	10763	46.872	39.199	-7.67332	1.50897e-64	0	-3.34951	1	1
Solyc01g058400	SL3.0ch01	66357491	66359491	+	3901	10227	3181	9875	27.612	24.364	-3.24756	1.50535e-09	0	-3.91086	1	1
Solyc01g058500	SL3.0ch01	66782775	66784775	-	835588	334480	227595	96109	71.414	70.31	-1.10402	1.39295e-33	1.56908	6.20693	0.00940956	0.463583
Solyc01g058520	SL3.0ch01	66807341	66809341	-	206	1469	28	601	12.299	4.452	-7.847	5.00811e-09	0.519034	-0.480366	0.469561	1
Solyc01g058700	SL3.0ch01	67656464	67658464	-	2985	9310	2128	7474	24.278	22.162	-2.11611	0.0001666	0	-3.91086	1	1
Solyc01g059780	SL3.0ch01	68349812	68351812	-	1184	3316	1087	3396	26.311	24.247	-2.06396	0.0126657	0	-3.91086	1	1
Solyc01g059920	SL3.0ch01	69263635	69265635	+	3149	4286	2671	4080	42.354	39.565	-2.78922	0.000485391	-0.299405	2.5463	0.507313	1
Solyc01g059930	SL3.0ch01	69278761	69280761	+	7004	12493	5777	11452	35.923	33.531	-2.3928	1.48098e-06	0.188766	6.81254	0.610757	1
Solyc01g060040	SL3.0ch01	69390421	69392421	-	359	2677	251	2395	11.825	9.486	-2.33875	0.00258016	0.274122	4.24565	0.388255	1
Solyc01g060080	SL3.0ch01	69524484	69526484	-	4253	6013	3699	6146	41.428	37.572	-3.85564	2.68105e-08	0.275657	5.32462	0.361443	1
Solyc01g060160	SL3.0ch01	69632290	69634290	+	113	987	71	1144	10.273	5.844	-4.42911	7.91493e-05	-1.52317	-3.41372	0.525574	1
Solyc01g060240	SL3.0ch01	69849246	69851246	+	4174	6571	3313	6081	38.846	35.267	-3.57878	1.72249e-07	-0.896873	4.19646	0.0683229	1
Solyc01g060318	SL3.0ch01	70193267	70195267	+	1775	4095	1415	3546	30.239	28.522	-1.71603	0.0241271	1.94326	-3.02414	1	1
Solyc01g060340	SL3.0ch01	70216873	70218873	-	117	526	107	706	18.196	13.161	-5.03482	0.00459769	0	-3.91086	1	1
Solyc01g060380	SL3.0ch01	70808739	70810739	-	2857	5383	1254	3376	34.672	27.084	-7.5881	1.49589e-18	2.62629	-3.75877	0.605764	1
Solyc01g060390	SL3.0ch01	70809201	70811201	-	1485	4764	326	2744	23.764	10.619	-13.1449	3.98302e-54	-3.0415	-3.76582	0.487984	1
Solyc01g060400	SL3.0ch01	70809838	70811838	-	568	4211	83	2550	11.885	3.152	-8.73303	2.72374e-41	0	-3.91086	1	1
Solyc01g065495	SL3.0ch01	71547608	71549608	+	1175	3785	978	4064	23.69	19.397	-4.29245	1.93745e-07	0.364282	3.83573	0.305226	1
Solyc01g065970	SL3.0ch01	72540623	72542623	-	1879	5421	1590	5154	25.74	23.577	-2.16321	0.00179997	0	-3.91086	1	1
Solyc01g066270	SL3.0ch01	73602163	73604163	-	2002	5888	1889	5934	25.374	24.147	-1.22714	0.0343254	1.78082	-2.5485	0.348337	1
Solyc01g066320	SL3.0ch01	73866162	73868162	+	3590	4041	3143	3929	47.045	44.443	-2.60207	0.000945544	0	-3.91086	1	1
Solyc01g066380	SL3.0ch01	74055611	74057611	+	2463	7930	2037	6927	23.699	22.724	-0.974413	0.0489329	0	-3.91086	1	1
Solyc01g066480	SL3.0ch01	74298379	74300379	-	1380	8476	1209	8103	14.002	12.983	-1.01838	0.0192525	-0.126108	5.28242	0.66683	1
Solyc01g066490	SL3.0ch01	74299443	74301443	+	1236	5598	1020	5595	18.086	15.42	-2.66654	2.76503e-05	-1.37711	-2.89078	0.533278	1
Solyc01g066760	SL3.0ch01	74757675	74759675	-	6920	8803	5330	7452	44.012	41.699	-2.31269	6.42358e-05	-0.390226	0.0275624	0.806418	1
Solyc01g066865	SL3.0ch01	74876315	74878315	+	80	1628	50	1480	4.684	3.268	-1.41587	0.0226396	0	-3.91086	1	1
Solyc01g066890	SL3.0ch01	74957004	74959004	-	65	599	12	454	9.789	2.575	-7.21405	8.77849e-07	0	-3.57662	1	1
Solyc01g066940	SL3.0ch01	75024149	75026149	+	5011	8450	5027	9400	37.226	34.844	-2.38167	2.77137e-05	0.189936	5.00617	0.558593	1
Solyc01g067025	SL3.0ch01	75178396	75180396	-	6168	9740	5213	8681	38.773	37.52	-1.25315	0.0133711	-1.08955	-0.838316	0.475185	1
Solyc01g067030	SL3.0ch01	75184001	75186001	-	884	7745	748	7419	10.245	9.159	-1.08571	0.0090448	-0.0163156	1.85884	0.985209	1
Solyc01g067200	SL3.0ch01	75427865	75429865	+	243	1850	210	1882	11.61	10.038	-1.57189	0.0484304	0	-3.91086	1	1
Solyc01g067210	SL3.0ch01	75427865	75429865	+	243	1850	210	1882	11.61	10.038	-1.57189	0.0484304	-0.345088	-0.499288	0.661079	1
Solyc01g067330	SL3.0ch01	75618037	75620037	+	1145	9742	1112	10249	10.517	9.788	-0.72926	0.0326838	0	-3.91086	1	1
Solyc01g067340	SL3.0ch01	75618037	75620037	+	1145	9742	1112	10249	10.517	9.788	-0.72926	0.0326838	-1.93416	-3.834	1	1
Solyc01g067390	SL3.0ch01	75677303	75679303	+	2161	5823	1443	5239	27.067	21.595	-5.4713	3.52323e-14	0.218992	7.03044	0.443153	1
Solyc01g067420	SL3.0ch01	75810336	75812336	-	1066	3106	651	2246	25.551	22.472	-3.07977	0.0017783	0	-3.91086	1	1
Solyc01g067550	SL3.0ch01	76119659	76121659	-	2279	9966	1851	9056	18.612	16.971	-1.64093	0.000713299	0.138846	5.75344	0.667897	1
Solyc01g067620	SL3.0ch01	76261582	76263582	+	42	996	13	787	4.046	1.625	-2.42124	0.00133895	0.789837	2.8009	0.202129	1
Solyc01g067690	SL3.0ch01	76392645	76394645	-	159	1492	2	452	9.631	0.441	-9.19	1.00361e-14	-0.205014	2.24018	0.645573	1
Solyc01g067750	SL3.0ch01	76500105	76502105	+	1768	7090	2184	9336	19.959	18.958	-1.00103	0.0334699	-0.202686	5.55665	0.457653	1
Solyc01g067860	SL3.0ch01	76648640	76650640	+	3758	7888	3096	6928	32.269	30.886	-1.38272	0.0147773	0	-3.91086	1	1
Solyc01g067880	SL3.0ch01	76673122	76675122	+	4041	6627	3931	7126	37.88	35.552	-2.3275	0.000258705	0	-3.91086	1	1
Solyc01g067930	SL3.0ch01	76750473	76752473	+	3081	11348	2361	10106	21.353	18.938	-2.41483	8.35081e-07	0.122473	4.99104	0.794621	1
Solyc01g067990	SL3.0ch01	76846920	76848920	+	6764	6901	6358	6865	49.499	48.083	-1.41583	0.010325	0	-3.91086	1	1
Solyc01g068100	SL3.0ch01	77013470	77015470	-	2146	10570	1881	10551	16.876	15.13	-1.74607	0.000116436	0.216408	8.06111	0.498284	1
Solyc01g068120	SL3.0ch01	77041874	77043874	+	3015	6312	2514	6626	32.326	27.505	-4.82004	1.48875e-12	-2.43873	-3.62421	0.451487	1
Solyc01g068263	SL3.0ch01	77194677	77196677	-	46	475	5	314	8.829	1.567	-7.26178	4.18398e-06	0.456719	1.06976	0.502152	1
Solyc01g068267	SL3.0ch01	77201717	77203717	-	4605	7367	4225	7263	38.465	36.778	-1.68724	0.00429949	1.41539	0.183461	0.141582	1
Solyc01g068270	SL3.0ch01	77217325	77219325	+	6128	11758	4258	9047	34.261	32.003	-2.25843	2.29299e-05	0.00611905	5.41957	0.987402	1
Solyc01g068430	SL3.0ch01	77487725	77489725	+	2096	9164	1987	9370	18.615	17.496	-1.11875	0.014433	1.1076	-1.84881	0.516787	1
Solyc01g068460	SL3.0ch01	77514073	77516073	-	4979	9202	4631	10301	35.11	31.014	-4.09643	2.22337e-13	0	-3.91086	1	1
Solyc01g079200	SL3.0ch01	78146506	78148506	-	4589	9039	3889	8197	33.673	32.178	-1.49559	0.00589105	1.19662	1.57614	0.35032	1
Solyc01g079235	SL3.0ch01	78180880	78182880	+	869	8671	625	7269	9.109	7.917	-1.19161	0.00286567	-0.0293675	6.11158	0.913451	1
Solyc01g079270	SL3.0ch01	78220427	78222427	-	6181	7727	5012	7441	44.442	40.247	-4.19472	9.88071e-12	0	-3.91086	1	1
Solyc01g079290	SL3.0ch01	78233616	78235616	-	1695	7401	1333	7628	18.635	14.876	-3.75899	2.19093e-11	1.30213	-0.241144	0.102516	1
Solyc01g079390	SL3.0ch01	78331324	78333324	+	159	1244	40	1234	11.333	3.14	-8.19314	2.21592e-16	-0.0631702	5.58338	0.841191	1
Solyc01g079425	SL3.0ch01	78358129	78360129	+	21	1247	2	487	1.656	0.409	-1.24715	0.0176742	0.517236	0.278693	0.340517	1
Solyc01g079460	SL3.0ch01	78375458	78377458	-	5024	6723	4034	6138	42.768	39.658	-3.11048	2.76976e-06	-1.01596	-3.1107	0.737592	1
Solyc01g079550	SL3.0ch01	78476109	78478109	+	68	1043	56	1382	6.121	3.894	-2.22631	0.00627016	0.976526	-1.31736	0.383225	1
Solyc01g079650	SL3.0ch01	78631307	78633307	+	1913	10019	1708	9672	16.033	15.009	-1.02373	0.0153261	0.344092	4.3406	0.301105	1
Solyc01g079670	SL3.0ch01	78651137	78653137	-	2465	8078	1940	7097	23.38	21.467	-1.91314	0.000860398	0.888957	2.76999	0.312924	1
Solyc01g079850	SL3.0ch01	78840518	78842518	-	3577	9280	3084	9034	27.821	25.45	-2.37168	1.9001e-05	-1.10086	-1.13696	0.333075	1
Solyc01g079870	SL3.0ch01	78866653	78868653	-	3678	12157	2899	10499	23.227	21.638	-1.58947	0.00075507	0.241199	7.12117	0.362062	1
Solyc01g079880	SL3.0ch01	78887702	78889702	-	2526	10366	1676	8346	19.594	16.723	-2.87034	2.77555e-08	-0.384445	9.58865	0.206437	1
Solyc01g079990	SL3.0ch01	78981895	78983895	-	3162	11170	2817	10736	22.063	20.785	-1.27745	0.00522121	0	-3.91086	1	1
Solyc01g080070	SL3.0ch01	79079067	79081067	-	3718	12035	3011	10649	23.602	22.042	-1.55939	0.000917123	0.387152	4.26229	0.303462	1
Solyc01g080100	SL3.0ch01	79113394	79115394	-	87	2643	28	1608	3.187	1.711	-1.47532	0.00187375	-1.17211	-0.331115	0.246336	1
Solyc01g080130	SL3.0ch01	79140332	79142332	-	6606	8361	6393	8958	44.137	41.645	-2.49161	9.92364e-06	-0.266662	4.30854	0.44994	1
Solyc01g080180	SL3.0ch01	79248510	79250510	+	577	4885	446	4301	10.564	9.395	-1.16849	0.0239563	0.078793	2.77329	0.849372	1
Solyc01g080210	SL3.0ch01	79283483	79285483	-	2281	12419	1958	12322	15.517	13.711	-1.80552	1.15604e-05	-0.141926	4.33187	0.735291	1
Solyc01g080220	SL3.0ch01	79285546	79287546	+	5087	5776	4286	5279	46.829	44.809	-2.01948	0.00223892	0.733334	4.09671	0.343695	1
Solyc01g080240	SL3.0ch01	79313065	79315065	+	1236	7672	1139	8615	13.875	11.677	-2.19791	6.07615e-06	-0.200291	6.1448	0.444779	1
Solyc01g080490	SL3.0ch01	79577256	79579256	-	918	6550	669	5445	12.292	10.942	-1.35035	0.00807375	4.56901	-2.99075	0.0861563	1
Solyc01g080520	SL3.0ch01	79616012	79618012	+	525	2002	407	2554	20.776	13.745	-7.03027	1.02215e-11	-1.9143	-3.87151	1	1
Solyc01g080670	SL3.0ch01	79767699	79769699	+	7288	10615	6451	9781	40.708	39.742	-0.965777	0.0318109	0.00633432	5.93951	0.984929	1
Solyc01g080680	SL3.0ch01	79778937	79780937	+	2743	10001	1986	7699	21.524	20.506	-1.01792	0.0294349	-2.85919	4.51473	0.000340084	0.0473463
Solyc01g080760	SL3.0ch01	79841973	79843973	-	6646	7101	5475	6404	48.345	46.09	-2.25536	0.000214423	0.0629357	3.6354	0.852878	1
Solyc01g080787	SL3.0ch01	79907762	79909762	+	2753	4383	1938	3877	38.579	33.328	-5.25143	8.72974e-10	0	-3.91086	1	1
Solyc01g080910	SL3.0ch01	80101754	80103754	+	6641	9458	5960	9750	41.251	37.938	-3.31339	2.08752e-09	0.404891	7.21979	0.209385	1
Solyc01g080920	SL3.0ch01	80114794	80116794	+	456	4670	388	4583	8.896	7.805	-1.09055	0.0225699	-3.39604	-3.76922	0.437999	1
Solyc01g080950	SL3.0ch01	80137334	80139334	+	1407	7053	1444	7961	16.631	15.354	-1.27767	0.0104849	0	-3.91086	1	1
Solyc01g081020	SL3.0ch01	80181397	80183397	-	635	2143	541	2697	22.858	16.708	-6.15033	2.89363e-09	0.614071	-2.11208	0.61134	1
Solyc01g081030	SL3.0ch01	80193532	80195532	-	6128	9403	5409	8857	39.457	37.915	-1.54125	0.00353019	0.000890227	5.90758	0.998234	1
Solyc01g081060	SL3.0ch01	80240849	80242849	+	3552	11682	2813	10286	23.316	21.475	-1.84134	0.000150569	0.79332	9.20955	0.0879532	1
Solyc01g081080	SL3.0ch01	80281965	80283965	-	2724	9539	2115	8847	22.213	19.294	-2.91924	4.92616e-08	0	-3.91086	1	1
Solyc01g081177	SL3.0ch01	80333680	80335680	+	701	9379	605	9891	6.954	5.764	-1.19026	0.000316637	0.565521	0.971707	0.302963	1
Solyc01g081297	SL3.0ch01	80385214	80387214	-	8497	10031	6658	8457	45.86	44.049	-1.81136	0.000575288	0.147173	4.75428	0.681615	1
Solyc01g081325	SL3.0ch01	80403477	80405477	-	280	3146	199	2740	8.173	6.771	-1.40179	0.017378	0	-3.91086	1	1
Solyc01g081340	SL3.0ch01	80431721	80433721	+	10200	8532	9277	8133	54.452	53.285	-1.16681	0.0131631	3.92151	-3.16674	0.308834	1
Solyc01g081360	SL3.0ch01	80441511	80443511	+	4835	9657	3435	7998	33.363	30.045	-3.31863	1.48185e-08	0	-3.91086	1	1
Solyc01g081410	SL3.0ch01	80468854	80470854	-	10237	8444	11094	9685	54.799	53.39	-1.40855	0.00284524	-0.642829	1.63649	0.230385	1
Solyc01g081440	SL3.0ch01	80505752	80507752	-	8458	8140	7627	8323	50.958	47.818	-3.13976	1.7991e-08	0.411927	3.9242	0.2577	1
Solyc01g081520	SL3.0ch01	80577140	80579140	-	3844	7806	1155	3825	32.996	23.193	-9.80294	1.4989e-36	-0.0532933	5.94881	0.837807	1
Solyc01g081530	SL3.0ch01	80579704	80581704	-	5365	9833	4061	8019	35.301	33.618	-1.68315	0.00215888	1.90136	-3.87171	1	1
Solyc01g081590	SL3.0ch01	80645927	80647927	-	446	5533	276	4541	7.459	5.73	-1.72973	0.000240147	0	-3.91086	1	1
Solyc01g081630	SL3.0ch01	80678640	80680640	+	286	8036	158	7484	3.437	2.068	-1.36915	1.3871e-07	0	-3.86962	1	1
Solyc01g081640	SL3.0ch01	80690362	80692362	-	2897	9610	1974	8938	23.163	18.09	-5.07285	4.10632e-21	-0.335504	-2.20332	0.772834	1
Solyc01g073700	SL3.0ch01	80956511	80958511	-	897	8601	513	7735	9.444	6.22	-3.2244	3.97438e-15	0	-3.91086	1	1
Solyc01g073740	SL3.0ch01	80989755	80991755	+	2903	12279	1976	11092	19.121	15.121	-4.00042	1.73588e-18	0.0500682	6.98425	0.87772	1
Solyc01g073780	SL3.0ch01	81038206	81040206	-	590	3758	356	3153	13.569	10.145	-3.42412	3.02498e-06	0	-3.69406	1	1
Solyc01g073910	SL3.0ch01	81129116	81131116	+	2091	10051	1526	10361	17.221	12.838	-4.38366	7.09794e-21	0.962239	1.51095	0.356953	1
Solyc01g073960	SL3.0ch01	81198362	81200362	-	8641	9570	7989	9153	47.449	46.605	-0.844514	0.0487962	0.325111	5.64805	0.250771	1
Solyc01g073970	SL3.0ch01	81199451	81201451	+	5215	9656	4481	8691	35.068	34.019	-1.04912	0.0302869	-0.100349	1.34718	0.892337	1
Solyc01g074010	SL3.0ch01	81222780	81224780	-	427	8731	338	9325	4.663	3.498	-1.16471	4.18289e-05	0.149947	5.6552	0.594739	1
Solyc01g074020	SL3.0ch01	81222222	81224222	+	443	8741	333	9103	4.824	3.529	-1.29457	8.61113e-06	0.679824	3.32389	0.0561232	1
Solyc01g086710	SL3.0ch01	81532499	81534499	+	1616	3396	1587	3623	32.243	30.461	-1.78197	0.0244199	0.555011	4.97889	0.0841405	1
Solyc01g086953	SL3.0ch01	81730188	81732188	-	1285	4849	1117	4774	20.949	18.961	-1.98768	0.00364098	3.77258	-3.69836	0.195502	1
Solyc01g086957	SL3.0ch01	81736859	81738859	+	539	3258	326	2444	14.195	11.769	-2.42646	0.00250256	0.0056373	4.2907	0.987204	1
Solyc01g086960	SL3.0ch01	81750914	81752914	-	4659	7682	3750	7811	37.752	32.437	-5.31557	2.2508e-17	0.44319	8.87499	0.192154	1
Solyc01g087120	SL3.0ch01	81913103	81915103	+	240	2530	124	1755	8.664	6.599	-2.06501	0.00555779	-0.156884	7.8888	0.570338	1
Solyc01g087210	SL3.0ch01	82016312	82018312	-	3452	8900	3496	9680	27.947	26.533	-1.4138	0.00598165	-0.0480814	8.22187	0.884608	1
Solyc01g087260	SL3.0ch01	82083087	82085087	-	10818	10117	8803	8933	51.674	49.634	-2.04072	4.88937e-05	0.253684	8.39692	0.395988	1
Solyc01g087280	SL3.0ch01	82089600	82091600	+	1271	10175	920	8222	11.104	10.063	-1.04087	0.00866777	0	-3.91086	1	1
Solyc01g087330	SL3.0ch01	82162401	82164401	-	459	5263	339	4831	8.022	6.557	-1.46461	0.00206986	-0.38426	-0.035027	0.636211	1
Solyc01g087340	SL3.0ch01	82180221	82182221	-	2229	6240	1302	4829	26.32	21.236	-5.08318	2.25314e-12	0.432865	1.30541	0.333889	1
Solyc01g087338	SL3.0ch01	82183803	82185803	+	10547	8399	9154	7694	55.669	54.333	-1.33588	0.0059721	-2.36206	-3.6267	0.379242	1
Solyc01g087360	SL3.0ch01	82188979	82190979	-	69	912	61	1299	7.034	4.485	-2.54835	0.00543233	0.257162	-0.643044	1	1
Solyc01g087380	SL3.0ch01	82190435	82192435	-	2502	7353	885	3669	25.388	19.433	-5.95466	5.60358e-15	0.0363484	3.81304	0.916321	1
Solyc01g087430	SL3.0ch01	82279647	82281647	-	3333	12208	2672	10785	21.446	19.856	-1.59066	0.000552489	0.0162857	4.78414	0.960723	1
Solyc01g087460	SL3.0ch01	82298979	82300979	+	94	3798	52	3304	2.415	1.549	-0.865747	0.00496297	-4.02177	-3.69902	0.161415	1
Solyc01g087690	SL3.0ch01	82493437	82495437	-	8859	5428	6506	4449	62.007	59.388	-2.61901	1.96084e-05	1.78816	-3.87428	1	1
Solyc01g087700	SL3.0ch01	82492962	82494962	+	9180	6087	6759	4803	60.13	58.459	-1.67095	0.0033094	-2.79109	-3.19418	0.19492	1
Solyc01g087840	SL3.0ch01	82587626	82589626	+	31	1396	0	294	2.172	0	-2.17239	0.00333793	-0.146487	1.83407	0.822464	1
Solyc01g087850	SL3.0ch01	82592920	82594920	+	367	6630	242	5042	5.245	4.58	-0.665241	0.0413036	-1.10713	4.52347	0.153269	1
Solyc01g087880	SL3.0ch01	82625241	82627241	+	10911	7789	9179	6919	58.348	57.02	-1.32809	0.00664868	0.233322	3.96998	0.582335	1
Solyc01g088050	SL3.0ch01	82772932	82774932	+	4576	10699	3080	8353	29.957	26.94	-3.01789	7.13252e-08	0.154869	1.34201	0.809172	1
Solyc01g088220	SL3.0ch01	82923737	82925737	+	16	58	0	127	21.622	0	-21.6216	4.06856e-08	0	-3.91086	1	1
Solyc01g088280	SL3.0ch01	82950766	82952766	-	3984	5579	2789	4592	41.661	37.786	-3.87436	3.49904e-07	0	-3.91086	1	1
Solyc01g088560	SL3.0ch01	83213794	83215794	-	5914	9145	4501	7402	39.272	37.814	-1.4582	0.00778727	0.173281	6.58984	0.601207	1
Solyc01g088640	SL3.0ch01	83282940	83284940	-	6095	7329	5567	7905	45.404	41.323	-4.08101	2.41437e-11	0.338451	4.46869	0.283726	1
Solyc01g088650	SL3.0ch01	83289591	83291591	-	1520	6211	1373	6203	19.661	18.123	-1.53808	0.00808886	-0.0144347	4.31288	0.964382	1
Solyc01g088695	SL3.0ch01	83304850	83306850	+	53	443	10	244	10.685	3.937	-6.74848	0.000772121	0	-3.91086	1	1
Solyc01g088730	SL3.0ch01	83373965	83375965	-	1108	4101	1177	4741	21.271	19.888	-1.3824	0.0334556	0.150741	5.55801	0.597975	1
Solyc01g089880	SL3.0ch01	83475141	83477141	-	818	3147	463	2112	20.631	17.981	-2.64993	0.00479611	0.397508	2.85906	0.684056	1
Solyc01g089990	SL3.0ch01	83585037	83587037	-	4022	5658	2055	3718	41.55	35.597	-5.95284	3.98516e-13	1.13953	-3.26811	0.721711	1
Solyc01g090000	SL3.0ch01	83588119	83590119	-	1380	5496	898	4115	20.07	17.913	-2.15638	0.00184182	0	-3.91086	1	1
Solyc01g090170	SL3.0ch01	83663698	83665698	+	781	8978	537	7238	8.003	6.907	-1.09612	0.00340968	0.0017236	6.18382	0.99572	1
Solyc01g090210	SL3.0ch01	83727365	83729365	+	2463	4389	2668	5091	35.946	34.386	-1.55983	0.0232997	-0.0593364	2.80898	0.937009	1
Solyc01g090280	SL3.0ch01	83827184	83829184	-	1691	5569	1483	5539	23.292	21.119	-2.17267	0.00108803	-0.0354173	5.77417	0.89136	1
Solyc01g090300	SL3.0ch01	83837126	83839126	+	3239	9450	2570	8512	25.526	23.191	-2.33529	2.31835e-05	-1.52471	-2.0277	0.392896	1
Solyc01g090380	SL3.0ch01	83953986	83955986	+	4961	10395	4510	10186	32.307	30.689	-1.61797	0.00149665	0.0908272	4.10823	0.768993	1
Solyc01g090410	SL3.0ch01	83961063	83963063	+	6228	5494	5637	5219	53.131	51.925	-1.20566	0.0325679	-0.590597	-1.66288	0.539679	1
Solyc01g090425	SL3.0ch01	83982154	83984154	-	4460	8427	3598	7120	34.609	33.57	-1.03882	0.0420671	0.380599	-0.0165658	0.679917	1
Solyc01g090515	SL3.0ch01	84052888	84054888	+	52	398	6	117	11.556	4.878	-6.67751	0.0139839	0.0558249	0.190381	0.944578	1
Solyc01g090560	SL3.0ch01	84101763	84103763	+	708	10534	566	9483	6.298	5.632	-0.665411	0.0203155	-0.807647	0.955218	0.49825	1
Solyc01g090680	SL3.0ch01	84203791	84205791	-	103	1536	25	553	6.284	4.325	-1.95906	0.0425334	0	-3.91086	1	1
Solyc01g090690	SL3.0ch01	84200679	84202679	+	32	1039	3	438	2.988	0.68	-2.30759	0.0025175	0.174369	7.22542	0.48967	1
Solyc01g090840	SL3.0ch01	84416643	84418643	+	2388	9938	1998	10011	19.374	16.638	-2.73616	3.40381e-08	0.369404	1.83736	0.646238	1
Solyc01g090920	SL3.0ch01	84501286	84503286	-	9175	9165	8012	8296	50.027	49.129	-0.898001	0.042057	0.325633	2.75828	0.472478	1
Solyc01g090950	SL3.0ch01	84541050	84543050	-	294	6190	188	4903	4.534	3.693	-0.841447	0.0121961	-0.832975	4.10728	0.0169526	0.628351
Solyc01g090980	SL3.0ch01	84551406	84553406	+	3067	2881	2515	3147	51.564	44.419	-7.14462	2.90974e-14	2.84861	-3.4033	0.257926	1
Solyc01g090990	SL3.0ch01	84563336	84565336	-	3245	7601	2726	7236	29.919	27.364	-2.55488	3.63714e-05	-0.0997618	4.38712	0.734932	1
Solyc01g091050	SL3.0ch01	84645695	84647695	-	2963	7338	2445	7814	28.764	23.833	-4.93147	2.40906e-15	0	-3.87283	1	1
Solyc01g091200	SL3.0ch01	84760335	84762335	+	1827	11098	1468	9679	14.135	13.169	-0.965934	0.0149758	-0.174472	2.17199	0.779859	1
Solyc01g091270	SL3.0ch01	84804327	84806327	-	37	1381	6	478	2.609	1.24	-1.36964	0.0475159	0.371829	7.1163	0.333489	1
Solyc01g091400	SL3.0ch01	84912068	84914068	-	1428	6248	1190	6929	18.603	14.657	-3.94646	4.11244e-11	0	-3.78486	1	1
Solyc01g091490	SL3.0ch01	84996727	84998727	-	4924	8433	3676	7813	36.865	31.996	-4.86874	2.05667e-15	0.0987184	-2.35514	1	1
Solyc01g091530	SL3.0ch01	85025737	85027737	-	5524	9016	4778	8271	37.992	36.616	-1.37591	0.00940936	-0.611605	7.31667	0.262157	1
Solyc01g091585	SL3.0ch01	85049491	85051491	-	146	1124	57	952	11.496	5.649	-5.84691	8.16095e-07	-2.31064	-2.79998	0.113669	1
Solyc01g091650	SL3.0ch01	85124563	85126563	-	7610	9928	6017	8427	43.391	41.657	-1.73406	0.00111246	-0.0288018	6.01109	0.910781	1
Solyc01g091720	SL3.0ch01	85188352	85190352	+	208	3168	118	2186	6.161	5.122	-1.03961	0.0454684	0.0387558	3.10699	0.919639	1
Solyc01g091760	SL3.0ch01	85217581	85219581	-	4117	7259	4290	8353	36.19	33.932	-2.25841	0.000174256	0	-3.7043	1	1
Solyc01g091780	SL3.0ch01	85226438	85228438	+	341	3634	322	4071	8.579	7.33	-1.24877	0.0170041	-0.651966	3.77673	0.0918496	1
Solyc01g091810	SL3.0ch01	85243113	85245113	-	628	3937	423	3204	13.757	11.663	-2.09431	0.00290435	0	-3.6626	1	1
Solyc01g092950	SL3.0ch01	85369033	85371033	+	1825	7611	1494	6846	19.341	17.914	-1.42715	0.00780657	-3.02978	-3.42139	0.252708	1
Solyc01g093970	SL3.0ch01	85420538	85422538	+	7093	12264	5831	11181	36.643	34.276	-2.36727	2.33999e-06	0.0880188	5.20481	0.783704	1
Solyc01g094000	SL3.0ch01	85456728	85458728	-	4556	8270	4215	9107	35.522	31.639	-3.8822	4.67337e-11	-0.0268273	6.0979	0.92188	1
Solyc01g094020	SL3.0ch01	85468008	85470008	-	4707	9248	3732	7933	33.73	31.993	-1.7367	0.00191585	-0.373161	3.39839	0.46106	1
Solyc01g094090	SL3.0ch01	85546030	85548030	+	12383	9057	8288	7267	57.757	53.282	-4.47463	3.29631e-17	0	-3.91086	1	1
Solyc01g094100	SL3.0ch01	85558171	85560171	-	394	1921	29	351	17.019	7.632	-9.38786	8.51985e-07	-4.9367	-3.00262	0.027696	0.784969
Solyc01g094160	SL3.0ch01	85590783	85592783	-	3364	8544	3409	9298	28.25	26.828	-1.42218	0.00678011	0	-3.54109	1	1
Solyc01g094280	SL3.0ch01	85694355	85696355	-	84	1574	24	799	5.066	2.916	-2.15018	0.00813957	0.0563672	4.75515	0.86683	1
Solyc01g094485	SL3.0ch01	85821829	85823829	+	214	3836	112	3585	5.284	3.029	-2.25447	6.97672e-07	0.74454	2.69475	0.0889273	1
Solyc01g094560	SL3.0ch01	85865354	85867354	-	5080	10823	4151	9305	31.944	30.849	-1.09497	0.0212439	-1.18714	-3.20922	0.605981	1
Solyc01g094590	SL3.0ch01	85900396	85902396	-	24	266	8	454	8.276	1.732	-6.54426	1.85965e-05	-0.252207	2.16228	0.554678	1
Solyc01g094790	SL3.0ch01	86069124	86071124	+	4208	11878	3460	10301	26.159	25.144	-1.01587	0.0218114	0.376458	7.62746	0.372558	1
Solyc01g094990	SL3.0ch01	86245547	86247547	+	5396	9404	4911	9442	36.459	34.216	-2.24362	4.82059e-05	-0.825737	-2.78942	0.727509	1
Solyc01g095000	SL3.0ch01	86251821	86253821	-	183	3981	103	2829	4.395	3.513	-0.881852	0.0301543	-0.470712	3.95619	0.28205	1
Solyc01g095080	SL3.0ch01	86331529	86333529	-	2645	7808	2040	6839	25.304	22.976	-2.32818	0.000121144	3.93952	8.53518	4.85826e-06	0.00163934
Solyc01g095170	SL3.0ch01	86403418	86405418	+	333	3092	242	2765	9.723	8.048	-1.67474	0.0102286	-0.0453489	1.02091	0.95161	1
Solyc01g095190	SL3.0ch01	86415801	86417801	+	800	6034	733	6180	11.706	10.603	-1.10296	0.020027	-0.49086	-2.10672	0.777768	1
Solyc01g095260	SL3.0ch01	86463633	86465633	+	49	514	12	368	8.703	3.158	-5.54548	0.000408311	0	-3.91086	1	1
Solyc01g095310	SL3.0ch01	86499966	86501966	+	445	3704	276	3291	10.725	7.738	-2.98788	6.27837e-06	2.05768	-2.0303	0.106918	1
Solyc01g095305	SL3.0ch01	86501727	86503727	+	645	4254	459	4073	13.166	10.128	-3.03797	3.89078e-06	0.499413	5.13401	0.621838	1
Solyc01g095320	SL3.0ch01	86502562	86504562	+	649	4405	474	4940	12.841	8.755	-4.08623	2.3601e-11	0.263733	10.921	0.734104	1
Solyc01g095380	SL3.0ch01	86529643	86531643	-	7753	6707	6781	6482	53.617	51.127	-2.48968	2.67257e-05	0	-3.72533	1	1
Solyc01g095400	SL3.0ch01	86543354	86545354	+	71	2720	38	2342	2.544	1.597	-0.947252	0.00992256	0.0558337	6.08729	0.830718	1
Solyc01g095410	SL3.0ch01	86547715	86549715	+	262	1392	142	1280	15.84	9.986	-5.85445	1.59429e-06	0.166185	7.16462	0.614578	1
Solyc01g095490	SL3.0ch01	86605517	86607517	+	4811	10236	3912	9325	31.973	29.554	-2.41963	9.43801e-06	0.227658	5.4237	0.431339	1
Solyc01g095540	SL3.0ch01	86644551	86646551	-	182	4279	58	1825	4.08	3.08	-0.999612	0.0280688	-0.14619	5.00978	0.578364	1
Solyc01g095570	SL3.0ch01	86656019	86658019	-	1363	10481	988	8986	11.508	9.906	-1.60218	0.000105423	0	-3.91086	1	1
Solyc01g095580	SL3.0ch01	86666328	86668328	+	7325	10647	5226	8997	40.758	36.743	-4.01454	4.24453e-13	-0.0623911	6.68358	0.838338	1
Solyc01g095600	SL3.0ch01	86687845	86689845	+	227	4860	79	3581	4.462	2.158	-2.30389	4.72979e-09	0.242157	1.77063	0.681619	1
Solyc01g095610	SL3.0ch01	86694292	86696292	+	7039	10065	5697	9248	41.154	38.12	-3.03434	3.43515e-08	-0.0312501	2.76586	0.964653	1
Solyc01g095690	SL3.0ch01	86752465	86754465	+	2388	3965	1835	3565	37.589	33.981	-3.60706	3.84648e-05	-1.30756	1.43785	0.126618	1
Solyc01g095760	SL3.0ch01	86830783	86832783	+	6310	9050	5095	7650	41.081	39.976	-1.10427	0.0284794	0	-3.91086	1	1
Solyc01g095850	SL3.0ch01	86877247	86879247	-	66	733	60	1104	8.26	5.155	-3.10569	0.00358008	0	-3.91086	1	1
Solyc01g095930	SL3.0ch01	86940743	86942743	+	483	3559	189	3959	11.95	4.556	-7.39312	3.75568e-34	-0.440399	5.62942	0.311138	1
Solyc01g096080	SL3.0ch01	87064713	87066713	+	4663	8535	4339	8598	35.331	33.539	-1.79165	0.00137004	0.413404	3.51179	0.352264	1
Solyc01g096090	SL3.0ch01	87078039	87080039	-	5412	10177	3941	8085	34.717	32.771	-1.94612	0.000455672	-0.2056	7.77241	0.511816	1
Solyc01g096130	SL3.0ch01	87119354	87121354	-	2617	10577	2083	10231	19.835	16.916	-2.91907	2.31737e-09	0.148518	5.41583	0.616493	1
Solyc01g096175	SL3.0ch01	87145560	87147560	+	76	2397	26	1808	3.073	1.418	-1.65552	0.000237309	0	-3.72885	1	1
Solyc01g096290	SL3.0ch01	87253245	87255245	+	840	7919	707	7926	9.59	8.19	-1.40063	0.000776015	0.204266	7.59965	0.541328	1
Solyc01g096430	SL3.0ch01	87400552	87402552	-	79	2190	18	891	3.482	1.98	-1.50151	0.0145007	-0.682269	1.98651	0.358261	1
Solyc01g096530	SL3.0ch01	87479061	87481061	+	537	4319	407	3879	11.058	9.496	-1.56245	0.00751268	0.312976	5.31161	0.246546	1
Solyc01g096560	SL3.0ch01	87511231	87513231	+	3998	5094	3576	5378	43.973	39.937	-4.03527	4.42225e-08	-0.922348	-0.27858	0.277587	1
Solyc01g096600	SL3.0ch01	87554867	87556867	-	8180	9932	6869	8742	45.163	44.001	-1.1624	0.0160902	0.203609	5.64893	0.449718	1
Solyc01g096690	SL3.0ch01	87593075	87595075	-	2170	6709	1415	6970	24.44	16.875	-7.56432	8.8879e-34	1.78455	-3.73058	1	1
Solyc01g096800	SL3.0ch01	87669226	87671226	+	6502	9815	5778	9727	39.848	37.265	-2.58261	2.09337e-06	0.0666019	4.58467	0.846594	1
Solyc01g096900	SL3.0ch01	87760101	87762101	+	3824	7079	3177	6715	35.073	32.117	-2.95605	5.84543e-06	-0.256883	4.53025	0.473317	1
Solyc01g096940	SL3.0ch01	87819539	87821539	-	1820	9302	1503	10261	16.364	12.776	-3.5877	3.13906e-14	-0.802873	1.61755	0.317312	1
Solyc01g096980	SL3.0ch01	87846986	87848986	-	1599	1507	1294	2181	51.481	37.237	-14.2436	2.34322e-30	-0.796939	-3.1045	0.847013	1
Solyc01g097010	SL3.0ch01	87861522	87863522	+	248	8489	151	6161	2.839	2.392	-0.446234	0.0438559	0.199937	6.2182	0.437389	1
Solyc01g097030	SL3.0ch01	87883983	87885983	-	8609	13133	6088	9682	39.596	38.605	-0.991227	0.0244876	0.201773	4.46501	0.478451	1
Solyc01g097310	SL3.0ch01	88079051	88081051	+	48	914	43	1335	4.99	3.12	-1.86914	0.0113657	-0.240372	5.93324	0.415235	1
Solyc01g097330	SL3.0ch01	88102591	88104591	+	9447	10023	5998	8437	48.521	41.552	-6.96902	2.8291e-36	-0.107658	3.88269	0.765998	1
Solyc01g097350	SL3.0ch01	88123487	88125487	-	9536	8713	8318	7873	52.255	51.374	-0.880698	0.0450509	0.146902	6.56507	0.689822	1
Solyc01g097420	SL3.0ch01	88154645	88156645	-	1784	6562	1364	5784	21.376	19.082	-2.29325	0.000280337	3.9169	-2.98475	0.256732	1
Solyc01g097450	SL3.0ch01	88178738	88180738	+	203	1524	192	1873	11.754	9.298	-2.45667	0.00732492	0.0467129	7.07468	0.869168	1
Solyc01g097470	SL3.0ch01	88192998	88194998	-	1285	5773	1194	6550	18.206	15.418	-2.7879	5.27826e-06	1.24405	2.26913	0.327639	1
Solyc01g097480	SL3.0ch01	88193362	88195362	+	1272	6007	1196	7276	17.475	14.117	-3.35784	9.79953e-09	1.79156	-3.75331	1	1
Solyc01g097490	SL3.0ch01	88194044	88196044	+	1074	5597	1040	5995	16.1	14.783	-1.31631	0.016159	-1.62754	-3.45452	0.560327	1
Solyc01g097530	SL3.0ch01	88221311	88223311	+	41	1341	3	637	2.967	0.469	-2.49796	7.97385e-05	0.56012	-2.21978	0.617301	1
Solyc01g097620	SL3.0ch01	88271940	88273940	+	195	3646	118	3953	5.077	2.899	-2.17825	7.71402e-07	1.80839	-2.98189	1	1
Solyc01g097700	SL3.0ch01	88315518	88317518	+	5919	6164	5240	5754	48.986	47.662	-1.32382	0.0212976	-1.94065	-3.72817	1	1
Solyc01g097790	SL3.0ch01	88378123	88380123	-	7973	11259	6360	10187	41.457	38.436	-3.02098	7.51144e-09	0.128457	4.74114	0.634935	1
Solyc01g097810	SL3.0ch01	88398744	88400744	-	1728	8115	1470	8306	17.556	15.037	-2.5188	1.63721e-06	-0.271169	6.78529	0.374645	1
Solyc01g097930	SL3.0ch01	88479333	88481333	+	3331	8714	3040	8674	27.655	25.952	-1.70278	0.00179223	-3.46634	-3.41812	0.317875	1
Solyc01g097950	SL3.0ch01	88485563	88487563	+	1882	8319	1282	7209	18.449	15.098	-3.35083	1.4289e-09	-1.05591	1.82786	0.172845	1
Solyc01g098040	SL3.0ch01	88526341	88528341	-	949	9427	668	7669	9.146	8.012	-1.13363	0.00356161	-0.464474	-1.5455	0.679607	1
Solyc01g098100	SL3.0ch01	88574837	88576837	+	57	775	2	235	6.851	0.844	-6.00708	5.25697e-05	0.325516	4.74807	0.429505	1
Solyc01g098270	SL3.0ch01	88725757	88727757	+	1609	6904	1098	6607	18.901	14.25	-4.65002	4.54699e-15	0	-3.91086	1	1
Solyc01g098280	SL3.0ch01	88731412	88733412	+	7812	9869	7176	10487	44.183	40.627	-3.55572	2.16883e-11	-3.3349	-3.33211	0.267539	1
Solyc01g098300	SL3.0ch01	88744687	88746687	+	1819	6747	1663	7170	21.235	18.827	-2.40799	5.49251e-05	0	-3.91086	1	1
Solyc01g098450	SL3.0ch01	88843989	88845989	+	3267	7953	2539	7863	29.118	24.409	-4.70888	1.27439e-14	0.164363	3.18526	0.753649	1
Solyc01g098520	SL3.0ch01	88895939	88897939	-	324	3907	198	3275	7.658	5.701	-1.95664	0.000470533	0.307	3.82608	0.536028	1
Solyc01g098560	SL3.0ch01	88922659	88924659	+	1070	8064	796	7618	11.714	9.46	-2.25405	1.25398e-06	-0.271186	4.25184	0.494377	1
Solyc01g098817	SL3.0ch01	89106703	89108703	-	1731	2414	1545	2374	41.761	39.423	-2.33784	0.0160597	-1.92544	-3.73043	1	1
Solyc01g098890	SL3.0ch01	89143367	89145367	-	661	6235	563	6962	9.585	7.482	-2.10354	5.26909e-06	1.1066	-0.43884	0.354382	1
Solyc01g098910	SL3.0ch01	89157371	89159371	-	5784	10980	5371	10780	34.503	33.255	-1.2476	0.00868613	-0.0792124	7.15678	0.87164	1
Solyc01g098980	SL3.0ch01	89213435	89215435	-	71	1120	3	326	5.961	0.912	-5.04952	2.48537e-05	0.476983	-0.605461	0.63389	1
Solyc01g099010	SL3.0ch01	89233154	89235154	-	6592	9953	5024	7968	39.843	38.67	-1.1729	0.0197153	0	-3.91086	1	1
Solyc01g099030	SL3.0ch01	89278818	89280818	-	134	1164	25	458	10.324	5.176	-5.14759	0.000333528	-0.358506	-1.47297	0.782126	1
Solyc01g099070	SL3.0ch01	89278603	89280603	-	124	1161	35	854	9.65	3.937	-5.7128	2.43435e-07	0	-3.91086	1	1
Solyc01g099090	SL3.0ch01	89288229	89290229	-	4644	13079	2850	11573	26.203	19.76	-6.44313	2.48553e-41	-0.304621	6.92324	0.30656	1
Solyc01g099120	SL3.0ch01	89317316	89319316	+	1777	4016	1888	4638	30.675	28.93	-1.74452	0.0167945	0.185035	3.8981	0.615664	1
Solyc01g099160	SL3.0ch01	89351122	89353122	+	7205	10118	6304	9690	41.592	39.415	-2.17732	3.98088e-05	0.742198	4.16949	0.110607	1
Solyc01g099180	SL3.0ch01	89362504	89364504	+	1922	5046	1420	5086	27.583	21.826	-5.75723	2.22671e-14	1.39019	4.24504	0.111954	1
Solyc01g099190	SL3.0ch01	89372043	89374043	-	3222	8782	2862	8224	26.841	25.816	-1.02471	0.035016	0.961075	13.1191	0.0512322	1
Solyc01g099540	SL3.0ch01	89630484	89632484	+	2365	2855	2720	3644	45.307	42.74	-2.5661	0.00315897	0	-3.86778	1	1
Solyc01g099790	SL3.0ch01	89809377	89811377	+	4597	11193	3637	10260	29.113	26.171	-2.94225	1.84168e-08	0.0338565	6.92068	0.894321	1
Solyc01g099840	SL3.0ch01	89860093	89862093	+	2578	9438	1821	7771	21.455	18.985	-2.47016	6.48189e-06	-0.223222	8.30811	0.572659	1
Solyc01g099850	SL3.0ch01	89863994	89865994	+	1219	8830	756	6349	12.131	10.64	-1.49017	0.00152719	3.74393	-1.49145	0.000217746	0.0345051
Solyc01g099925	SL3.0ch01	89920626	89922626	+	994	5058	661	5151	16.424	11.373	-5.0513	4.37228e-15	-0.207296	0.434476	0.773453	1
Solyc01g100000	SL3.0ch01	89964112	89966112	-	368	8493	219	6956	4.153	3.052	-1.10077	0.00015803	-1.03716	5.86395	0.000535628	0.0662919
Solyc01g100020	SL3.0ch01	89972450	89974450	+	5033	8972	4463	8313	35.937	34.933	-1.00448	0.0386189	-1.31677	1.2886	0.0162568	0.614017
Solyc01g100060	SL3.0ch01	90036337	90038337	+	250	4710	124	3378	5.04	3.541	-1.49949	0.000641864	0.114961	5.2648	0.711938	1
Solyc01g100070	SL3.0ch01	90043529	90045529	-	181	1389	15	1052	11.529	1.406	-10.1229	5.43535e-26	-1.72116	-1.24784	0.39469	1
Solyc01g100080	SL3.0ch01	90042186	90044186	+	210	2899	61	2389	6.755	2.49	-4.26479	1.05256e-13	0.0963496	3.91589	0.792635	1
Solyc01g100260	SL3.0ch01	90203904	90205904	+	40	580	8	810	6.452	0.978	-5.47362	9.0694e-09	0.0278309	4.65296	0.927345	1
Solyc01g100330	SL3.0ch01	90270215	90272215	+	11287	9843	10493	9498	53.417	52.489	-0.928323	0.0278336	0.0951379	4.75314	0.721499	1
Solyc01g100380	SL3.0ch01	90308815	90310815	-	4477	9257	4025	8978	32.598	30.954	-1.64354	0.00228689	0	-3.91086	1	1
Solyc01g100420	SL3.0ch01	90326141	90328141	+	22	1027	1	236	2.097	0.422	-1.67529	0.0444531	-0.00819856	4.43154	0.980364	1
Solyc01g100440	SL3.0ch01	90340729	90342729	-	4903	10579	3735	8794	31.669	29.811	-1.8582	0.000523694	0.292081	-3.40668	1	1
Solyc01g100455	SL3.0ch01	90352503	90354503	+	444	2001	408	2204	18.16	15.62	-2.53929	0.00830554	-0.32055	0.2815	0.683995	1
Solyc01g100490	SL3.0ch01	90376789	90378789	+	2317	9748	1917	8875	19.204	17.763	-1.44115	0.00288873	2.01157	-0.306839	0.0202518	0.674456
Solyc01g100600	SL3.0ch01	90459460	90461460	-	6570	8735	6595	9246	42.927	41.632	-1.29468	0.0106391	-1.51705	1.85117	0.0493217	0.998946
Solyc01g100630	SL3.0ch01	90479529	90481529	+	1090	3745	770	2968	22.544	20.599	-1.9447	0.0148501	0.346283	3.57972	0.506381	1
Solyc01g100650	SL3.0ch01	90493588	90495588	+	1154	6553	636	5602	14.973	10.196	-4.77783	7.76725e-17	-0.387626	5.99085	0.179072	1
Solyc01g100690	SL3.0ch01	90536324	90538324	+	3935	11769	2988	9411	25.057	24.099	-0.958593	0.0300625	0.000101797	5.67272	1	1
Solyc01g100810	SL3.0ch01	90620881	90622881	-	1255	9210	742	7499	11.992	9.004	-2.98859	6.55832e-11	-0.848719	4.76816	0.0123749	0.537166
Solyc01g100990	SL3.0ch01	90739000	90741000	-	130	1000	98	1378	11.504	6.64	-4.86486	1.43504e-05	0.408593	4.01506	0.221271	1
Solyc01g101035	SL3.0ch01	90775837	90777837	-	4509	8606	4206	8551	34.38	32.97	-1.41035	0.00853968	1.42205	-3.41566	0.58123	1
Solyc01g101140	SL3.0ch01	90863084	90865084	+	1487	8739	1225	8541	14.541	12.544	-1.99785	3.00158e-05	0.0249526	7.0594	0.937156	1
Solyc01g101240	SL3.0ch01	90932540	90934540	+	9734	11134	8833	10582	46.646	45.496	-1.14983	0.010524	0.135359	7.73702	0.714456	1
Solyc01g102260	SL3.0ch01	90968683	90970683	-	592	5040	194	3708	10.511	4.972	-5.53955	1.19241e-22	-0.102986	0.751029	0.911226	1
Solyc01g102270	SL3.0ch01	90968846	90970846	+	584	4720	189	3222	11.011	5.541	-5.46966	7.85628e-19	-1.11333	3.3205	0.0138025	0.570738
Solyc01g102265	SL3.0ch01	90969001	90971001	+	586	4362	177	2693	11.843	6.167	-5.67592	1.20837e-16	0.0282598	-2.79043	1	1
Solyc01g102300	SL3.0ch01	90997673	90999673	+	4930	9608	4631	10214	33.911	31.196	-2.71544	6.87768e-07	0.450071	6.05171	0.241196	1
Solyc01g102340	SL3.0ch01	91039662	91041662	+	487	8477	374	7583	5.433	4.7	-0.732579	0.0158265	-0.409045	4.67368	0.361149	1
Solyc01g102360	SL3.0ch01	91073903	91075903	-	1613	10560	1176	8637	13.251	11.984	-1.26653	0.00292043	-4.43229	-3.65227	0.269633	1
Solyc01g102380	SL3.0ch01	91087753	91089753	+	2885	6546	2122	5664	30.591	27.254	-3.33656	1.53682e-06	0	-3.91086	1	1
Solyc01g102480	SL3.0ch01	91151930	91153930	-	4121	9089	4184	9970	31.196	29.561	-1.63552	0.0019294	-0.0261121	5.55531	0.919486	1
Solyc01g102530	SL3.0ch01	91193300	91195300	-	52	1373	0	130	3.649	0	-3.64912	0.00953452	0.0170432	3.89381	0.962382	1
Solyc01g102637	SL3.0ch01	91265729	91267729	-	8617	8252	8216	8243	51.082	49.918	-1.16389	0.0166998	0	-3.91086	1	1
Solyc01g102670	SL3.0ch01	91290059	91292059	-	6525	8187	5619	7813	44.352	41.833	-2.51861	1.67453e-05	0.43551	3.17593	0.244197	1
Solyc01g102675	SL3.0ch01	91289976	91291976	+	6528	8101	5611	7502	44.624	42.79	-1.83409	0.0012862	0	-3.58636	1	1
Solyc01g102680	SL3.0ch01	91293919	91295919	+	309	4638	149	3175	6.246	4.483	-1.76366	0.000380556	0.272738	-2.73202	0.945418	1
Solyc01g102685	SL3.0ch01	91297665	91299665	+	332	2595	155	1980	11.343	7.26	-4.08272	9.50132e-07	2.55294	-2.77168	0.611666	1
Solyc01g102690	SL3.0ch01	91300324	91302324	+	40	522	24	524	7.117	4.38	-2.73788	0.0251037	0.409781	0.211747	0.615011	1
Solyc01g102705	SL3.0ch01	91316650	91318650	+	499	4031	140	2473	11.015	5.358	-5.65763	2.03608e-16	-2.67533	-3.48477	0.300421	1
Solyc02g024060	SL3.0ch01	91318126	91320126	+	1873	6572	1555	5866	22.179	20.954	-1.22475	0.0291303	-0.683239	0.0819187	0.447045	1
Solyc02g024065	SL3.0ch01	91323590	91325590	+	108	832	100	1058	11.489	8.636	-2.85378	0.0160735	0	-3.91086	1	1
Solyc01g102890	SL3.0ch01	91444225	91446225	-	1209	10832	780	8224	10.041	8.663	-1.37788	0.000460239	0	-3.91086	1	1
Solyc01g102970	SL3.0ch01	91487448	91489448	+	463	7375	377	7018	5.907	5.098	-0.80908	0.0148302	0.506609	5.18274	0.0615838	1
Solyc01g102990	SL3.0ch01	91518876	91520876	+	3072	9291	2633	8905	24.848	22.82	-2.02809	0.000164082	-0.0104454	5.12531	0.969741	1
Solyc01g103080	SL3.0ch01	91631171	91633171	-	6009	5979	4575	4854	50.125	48.521	-1.6046	0.010121	0.201771	6.40689	0.477971	1
Solyc01g103190	SL3.0ch01	91728058	91730058	+	51	1685	8	1403	2.938	0.567	-2.37081	3.99319e-07	0.0842317	0.528281	0.903961	1
Solyc01g103185	SL3.0ch01	91729510	91731510	+	114	3816	75	3906	2.901	1.884	-1.01681	0.00184086	0.270642	3.91505	0.383325	1
Solyc01g103370	SL3.0ch01	91866909	91868909	+	3842	11833	2712	9756	24.51	21.752	-2.75868	5.87523e-08	0.0623945	6.32545	0.830203	1
Solyc01g103420	SL3.0ch01	91902558	91904558	+	4957	12157	3920	10873	28.965	26.499	-2.46557	9.13432e-07	0.13862	6.38133	0.621997	1
Solyc01g103450	SL3.0ch01	91937779	91939779	+	29	696	9	619	4	1.433	-2.56688	0.00260472	-0.153615	8.99957	0.627125	1
Solyc01g103457	SL3.0ch01	91945789	91947789	-	998	6997	693	5773	12.483	10.718	-1.7652	0.000646625	-0.45385	-1.36738	0.769619	1
Solyc01g103460	SL3.0ch01	91944980	91946980	+	919	6182	643	4999	12.942	11.397	-1.54517	0.00451298	-0.107907	3.4553	0.781735	1
Solyc01g103500	SL3.0ch01	91973854	91975854	-	2811	7634	2448	7357	26.912	24.967	-1.94554	0.00101049	0.373609	1.04185	0.712806	1
Solyc01g103720	SL3.0ch01	92156303	92158303	-	243	2377	62	1953	9.275	3.077	-6.19789	5.69147e-18	0.205185	7.02856	0.454581	1
Solyc01g103862	SL3.0ch01	92266198	92268198	-	300	2730	126	1768	9.901	6.653	-3.2484	5.33989e-05	1.10345	2.69351	0.0265005	0.771253
Solyc01g103910	SL3.0ch01	92298273	92300273	-	289	3595	276	4138	7.441	6.253	-1.18795	0.0158002	4.14377	-3.69072	0.332691	1
Solyc01g103920	SL3.0ch01	92301352	92303352	-	111	649	27	445	14.605	5.72	-8.88492	6.4891e-07	0.0344926	4.88941	0.945451	1
Solyc01g103950	SL3.0ch01	92326721	92328721	-	2152	16118	1709	13551	11.779	11.199	-0.579659	0.0435729	0.0556042	4.59632	0.854378	1
Solyc01g104010	SL3.0ch01	92378938	92380938	-	817	6268	624	5271	11.531	10.585	-0.946163	0.040871	-0.430247	-1.77684	0.743065	1
Solyc01g104090	SL3.0ch01	92455179	92457179	-	111	1102	37	580	9.151	5.997	-3.15411	0.00942562	-0.305498	0.065107	0.685495	1
Solyc01g104150	SL3.0ch01	92515634	92517634	-	7750	11051	6056	9020	41.221	40.17	-1.05141	0.0240911	2.10859	-3.07488	0.261975	1
Solyc01g104190	SL3.0ch01	92536721	92538721	+	6930	8164	5809	7283	45.912	44.371	-1.54168	0.00511214	0	-3.91086	1	1
Solyc01g104270	SL3.0ch01	92591552	92593552	+	5398	5547	4624	5098	49.319	47.562	-1.75709	0.00634921	-0.123826	6.38824	0.703427	1
Solyc01g104420	SL3.0ch01	92691876	92693876	-	24	368	11	341	6.122	3.125	-2.99745	0.0267955	3.91975	-3.32699	0.286866	1
Solyc01g104433	SL3.0ch01	92743307	92745307	-	624	3836	485	3416	13.991	12.433	-1.55832	0.0185182	-1.06877	1.0885	0.215451	1
Solyc01g104480	SL3.0ch01	92828201	92830201	+	152	1857	91	1409	7.566	6.067	-1.49929	0.041085	0.291992	5.73694	0.278717	1
Solyc01g104540	SL3.0ch01	92891584	92893584	+	3174	13969	2350	12329	18.515	16.009	-2.50558	5.00957e-09	0.284325	5.52726	0.315297	1
Solyc01g104590	SL3.0ch01	92939455	92941455	-	6366	8400	5460	7890	43.113	40.899	-2.21368	0.000123931	0.00709829	9.57732	0.980747	1
Solyc01g104600	SL3.0ch01	92940772	92942772	+	5725	9999	4553	9137	36.409	33.258	-3.15146	1.83898e-08	0.245175	4.64918	0.424917	1
Solyc01g104610	SL3.0ch01	92950574	92952574	-	639	5103	503	5067	11.129	9.031	-2.09801	0.000157425	1.94273	-3.69262	1	1
Solyc01g104620	SL3.0ch01	92950456	92952456	+	689	5731	535	5211	10.732	9.311	-1.42126	0.00505091	1.02496	3.51226	0.066019	1
Solyc01g104650	SL3.0ch01	92972817	92974817	+	6874	4171	6678	5119	62.236	56.608	-5.62869	1.36418e-17	1.5371	6.31769	0.00559431	0.339148
Solyc01g104680	SL3.0ch01	92993924	92995924	-	118	1755	117	2555	6.3	4.379	-1.92131	0.00241411	-0.129031	5.94142	0.71884	1
Solyc01g104710	SL3.0ch01	93011257	93013257	-	3368	9907	2284	7849	25.371	22.54	-2.83078	5.28729e-07	-0.168893	4.72936	0.728724	1
Solyc01g104750	SL3.0ch01	93023788	93025788	-	2878	3262	1728	2133	46.873	44.755	-2.11772	0.0188628	0.194392	1.15655	0.748985	1
Solyc01g104775	SL3.0ch01	93034082	93036082	-	2788	10396	2176	9736	21.147	18.267	-2.87955	1.29634e-08	0.151018	7.91048	0.563203	1
Solyc01g104780	SL3.0ch01	93042867	93044867	-	2728	8898	2187	7882	23.465	21.72	-1.74452	0.00132419	0.792447	1.03176	0.275549	1
Solyc01g104790	SL3.0ch01	93047856	93049856	+	5345	7275	4660	6667	42.353	41.141	-1.21277	0.0271879	0.101346	3.54583	0.75899	1
Solyc01g104940	SL3.0ch01	93154592	93156592	+	219	2721	43	1812	7.449	2.318	-5.13092	2.15212e-15	1.78817	-3.87428	1	1
Solyc01g104980	SL3.0ch01	93195152	93197152	-	1477	7635	1155	6881	16.209	14.373	-1.83657	0.000581244	0.652053	0.901788	0.247553	1
Solyc01g105000	SL3.0ch01	93200941	93202941	+	171	1984	71	1080	7.935	6.169	-1.76649	0.0311428	3.59757	-3.45197	0.467673	1
Solyc01g105030	SL3.0ch01	93219205	93221205	+	98	999	80	1145	8.933	6.531	-2.40284	0.0168048	0	-3.91086	1	1
Solyc01g105190	SL3.0ch01	93348913	93350913	+	1321	5980	1074	5265	18.093	16.943	-1.15068	0.0353185	1.11355	-2.12192	0.671423	1
Solyc01g105230	SL3.0ch01	93357100	93359100	+	1458	5759	1186	5366	20.202	18.101	-2.10096	0.00109006	-0.0220551	6.03438	0.94394	1
Solyc01g105260	SL3.0ch01	93388013	93390013	-	446	3952	389	4333	10.141	8.238	-1.90294	0.00106569	0	-3.91086	1	1
Solyc01g105270	SL3.0ch01	93396258	93398258	-	11044	7400	9259	6529	59.879	58.646	-1.23274	0.0106271	-0.000501242	4.24301	1	1
Solyc01g105320	SL3.0ch01	93423185	93425185	-	32	556	10	330	5.442	2.941	-2.501	0.0439985	0.201702	1.40556	0.765562	1
Solyc01g105410	SL3.0ch01	93480094	93482094	+	3245	7439	2694	7433	30.373	26.602	-3.77037	2.22235e-09	0.199034	7.95823	0.697923	1
Solyc01g105440	SL3.0ch01	93509997	93511997	-	23	273	19	523	7.77	3.506	-4.26474	0.0062999	-0.634236	-1.55376	0.569183	1
Solyc01g105450	SL3.0ch01	93514791	93516791	-	1874	11929	1400	10737	13.577	11.535	-2.04178	7.18209e-07	1.85244	-1.94652	0.24469	1
Solyc01g105495	SL3.0ch01	93538394	93540394	-	316	2497	316	3182	11.234	9.034	-2.19982	0.00233624	0.0614483	2.43838	0.890741	1
Solyc01g105570	SL3.0ch01	93603832	93605832	-	4985	6943	3837	5667	41.792	40.372	-1.41995	0.0174356	0.152422	4.5393	0.603959	1
Solyc01g105720	SL3.0ch01	93679395	93681395	+	2548	13087	1927	11263	16.297	14.61	-1.68722	6.0991e-05	-0.507304	6.37247	0.136407	1
Solyc01g105730	SL3.0ch01	93693078	93695078	-	3269	8484	2653	7486	27.814	26.166	-1.64789	0.00348416	0	-3.91086	1	1
Solyc01g105750	SL3.0ch01	93701532	93703532	-	189	1368	54	620	12.139	8.012	-4.12686	0.002197	0	-3.91086	1	1
Solyc01g105760	SL3.0ch01	93701842	93703842	-	228	1470	54	610	13.428	8.133	-5.29503	0.000205518	0	-3.91086	1	1
Solyc01g105827	SL3.0ch01	93754093	93756093	+	439	3957	296	3207	9.986	8.45	-1.53645	0.0107695	1.75342	-3.28367	0.452014	1
Solyc01g105850	SL3.0ch01	93770705	93772705	+	6057	8348	5152	7775	42.048	39.855	-2.19333	0.000166544	0	-3.91086	1	1
Solyc01g105880	SL3.0ch01	93788611	93790611	+	7589	8999	6566	8385	45.75	43.917	-1.83314	0.000679879	0.249065	0.386607	0.859279	1
Solyc01g105940	SL3.0ch01	93857173	93859173	+	1955	3413	970	2472	36.42	28.181	-8.23823	1.87848e-15	3.48887	-1.69313	0.041785	0.935274
Solyc01g106030	SL3.0ch01	93899606	93901606	+	110	798	26	456	12.115	5.394	-6.72035	3.02022e-05	0.261064	5.10897	0.315461	1
Solyc01g106205	SL3.0ch01	94037633	94039633	+	111	861	94	931	11.42	9.171	-2.24902	0.045835	-0.251391	-0.811241	0.796124	1
Solyc01g106390	SL3.0ch01	94201939	94203939	-	5283	5643	4603	5287	48.353	46.542	-1.81059	0.00501449	0.0441829	6.58918	0.94098	1
Solyc01g106400	SL3.0ch01	94201549	94203549	+	5292	6150	4615	5733	46.251	44.598	-1.65267	0.00763915	-2.18125	-0.268878	0.0146685	0.585563
Solyc01g106460	SL3.0ch01	94241410	94243410	+	5609	10968	4696	9546	33.836	32.973	-0.863141	0.0479188	-5.64275	-0.902776	0.000699861	0.0820741
Solyc01g106635	SL3.0ch01	94326948	94328948	-	907	6162	565	5512	12.831	9.297	-3.53332	1.96566e-10	0	-3.91086	1	1
Solyc01g106730	SL3.0ch01	94371397	94373397	-	150	3051	98	2678	4.686	3.53	-1.15578	0.0133368	1.78817	-3.87428	1	1
Solyc01g106790	SL3.0ch01	94446849	94448849	+	715	4159	588	3853	14.67	13.24	-1.42941	0.0227443	-0.700267	2.32366	0.141779	1
Solyc01g106800	SL3.0ch01	94454405	94456405	-	938	7947	565	5495	10.557	9.323	-1.23369	0.00714001	0.228915	2.95108	0.594369	1
Solyc01g106830	SL3.0ch01	94469477	94471477	+	3913	10768	3371	9906	26.653	25.39	-1.26373	0.00839337	-0.350529	0.873079	0.773121	1
Solyc01g106840	SL3.0ch01	94474740	94476740	+	1200	4034	901	3280	22.927	21.55	-1.37715	0.0483184	-1.29326	-2.55531	0.33165	1
Solyc01g106860	SL3.0ch01	94479454	94481454	+	2844	2528	2215	2598	52.941	46.021	-6.91998	5.31063e-12	0.577997	-2.87868	0.770937	1
Solyc01g106850	SL3.0ch01	94482398	94484398	-	142	1099	136	1880	11.442	6.746	-4.69635	4.73192e-06	0	-3.91086	1	1
Solyc01g106870	SL3.0ch01	94482350	94484350	+	142	847	135	1630	14.358	7.649	-6.70921	5.29302e-08	-0.124528	5.04319	0.653107	1
Solyc01g106910	SL3.0ch01	94516451	94518451	-	3293	4482	2467	3760	42.354	39.618	-2.7359	0.00067783	-2.00959	-0.888403	0.0275139	0.783115
Solyc01g106940	SL3.0ch01	94527408	94529408	+	980	6026	682	5143	13.988	11.708	-2.27986	9.15622e-05	0.19461	4.57539	0.549044	1
Solyc01g106980	SL3.0ch01	94577515	94579515	-	2018	10103	822	8055	16.649	9.26	-7.38891	1.86817e-54	-3.92714	-3.66542	0.358036	1
Solyc01g107030	SL3.0ch01	94596564	94598564	+	176	2134	126	2128	7.619	5.59	-2.02899	0.00338164	0	-3.91086	1	1
Solyc01g107130	SL3.0ch01	94638511	94640511	+	4837	5157	4417	5357	48.399	45.191	-3.20772	5.29294e-06	0.135897	7.57145	0.634568	1
Solyc01g107160	SL3.0ch01	94666393	94668393	+	6174	6101	6688	6893	50.297	49.245	-1.05208	0.041051	0.125712	4.86013	0.689008	1
Solyc01g107190	SL3.0ch01	94710829	94712829	+	1895	7033	1446	5863	21.225	19.784	-1.44153	0.0123539	0.69327	3.87198	0.107655	1
Solyc01g107210	SL3.0ch01	94744124	94746124	+	4818	8615	3886	7361	35.867	34.551	-1.31546	0.0152924	0.453393	3.27425	0.22438	1
Solyc01g107215	SL3.0ch01	94745394	94747394	+	76	1894	49	2251	3.858	2.13	-1.72743	0.00061564	0.20606	1.17122	0.679385	1
Solyc01g107220	SL3.0ch01	94751992	94753992	-	296	2709	189	2274	9.85	7.674	-2.17668	0.00269839	0	-3.91086	1	1
Solyc01g107250	SL3.0ch01	94760550	94762550	-	996	7021	865	6658	12.424	11.498	-0.925527	0.0356096	-0.396466	4.47952	0.355772	1
Solyc01g107277	SL3.0ch01	94771890	94773890	-	2485	9046	2095	9053	21.551	18.793	-2.75799	2.45559e-07	4.82521	-2.10723	0.0025505	0.206863
Solyc01g107280	SL3.0ch01	94782185	94784185	-	1288	10970	1187	11004	10.507	9.737	-0.770733	0.0218244	0.762779	0.225542	0.413007	1
Solyc01g107350	SL3.0ch01	94812040	94814040	-	2024	10033	1734	9299	16.787	15.716	-1.07044	0.0138813	0.209342	3.53244	0.622298	1
Solyc01g107395	SL3.0ch01	94858169	94860169	+	208	3662	92	2668	5.375	3.333	-2.04134	5.3395e-05	1.90134	-3.87171	1	1
Solyc01g107430	SL3.0ch01	94891112	94893112	-	74	1489	45	1391	4.734	3.134	-1.60078	0.0151088	0	-3.91086	1	1
Solyc01g107440	SL3.0ch01	94891924	94893924	-	2104	5206	1700	5442	28.782	23.803	-4.97963	1.83132e-11	0	-3.91086	1	1
Solyc01g107490	SL3.0ch01	94915506	94917506	+	2608	6732	1893	5536	27.923	25.481	-2.44169	0.000263034	-1.51983	-2.35108	0.42328	1
Solyc01g107590	SL3.0ch01	94983425	94985425	+	6461	10124	5425	9562	38.957	36.198	-2.75885	4.37912e-07	-0.552469	3.90774	0.225519	1
Solyc01g107610	SL3.0ch01	94998539	95000539	+	1365	6935	891	6520	16.446	12.023	-4.42311	5.2816e-15	0.355285	4.34859	0.262825	1
Solyc01g107620	SL3.0ch01	95003053	95005053	+	3109	5436	2634	4868	36.384	35.111	-1.27321	0.0421637	0.349305	3.48903	0.320395	1
Solyc01g107675	SL3.0ch01	95036779	95038779	+	2727	7694	2784	8257	26.168	25.215	-0.953207	0.0482659	-0.666871	-1.5134	0.481831	1
Solyc01g107860	SL3.0ch01	95151341	95153341	-	7595	9673	7294	9837	43.983	42.578	-1.40531	0.00470143	-0.204245	5.51892	0.567723	1
Solyc01g107870	SL3.0ch01	95152886	95154886	+	4792	10975	4213	10554	30.393	28.53	-1.86276	0.000242751	-0.0383617	9.65053	0.893417	1
Solyc01g107910	SL3.0ch01	95192129	95194129	-	6225	8140	5401	7751	43.334	41.066	-2.2685	0.000102791	-1.47831	3.98318	0.00959976	0.468437
Solyc01g107961	SL3.0ch01	95235266	95237266	+	4594	10607	3988	10448	30.222	27.625	-2.59631	8.21367e-07	0	-3.91086	1	1
Solyc01g107962	SL3.0ch01	95242440	95244440	+	2531	11585	1757	9041	17.93	16.272	-1.65848	0.000380617	0	-3.91086	1	1
Solyc01g107990	SL3.0ch01	95274402	95276402	-	8988	9439	6633	9329	48.776	41.555	-7.22131	5.54585e-40	0.0894179	4.06996	0.816369	1
Solyc01g108060	SL3.0ch01	95328112	95330112	-	1235	2960	1393	3857	29.44	26.533	-2.90648	0.00109001	-0.00319115	0.516332	1	1
Solyc01g108080	SL3.0ch01	95332008	95334008	-	27	642	0	80	4.036	0	-4.03587	0.0450272	-4.16527	-3.61771	0.341157	1
Solyc01g108120	SL3.0ch01	95370068	95372068	+	6193	14513	4652	12484	29.909	27.148	-2.76168	4.09011e-09	0.1348	4.22134	0.684059	1
Solyc01g108160	SL3.0ch01	95416572	95418572	+	5684	7795	5670	8101	42.169	41.173	-0.99582	0.0427682	0.115956	5.14543	0.699905	1
Solyc01g108170	SL3.0ch01	95439252	95441252	-	2936	4940	2055	5331	37.278	27.823	-9.4549	1.01444e-34	-2.055	-2.07715	0.388896	1
Solyc01g108260	SL3.0ch01	95522468	95524468	-	2842	5172	2533	5480	35.463	31.611	-3.85181	2.56939e-07	-0.183243	5.93696	0.556836	1
Solyc01g108310	SL3.0ch01	95560494	95562494	+	4617	10176	3981	9740	31.211	29.014	-2.19679	4.19852e-05	0	-3.86959	1	1
Solyc01g108350	SL3.0ch01	95585059	95587059	+	49	962	7	399	4.847	1.724	-3.12255	0.00334648	-2.26904	-3.22301	0.556215	1
Solyc01g108390	SL3.0ch01	95600581	95602581	-	3695	6913	3043	6814	34.832	30.871	-3.96074	2.29736e-09	-0.801773	0.246137	0.376685	1
Solyc01g108470	SL3.0ch01	95688086	95690086	-	60	760	37	663	7.317	5.286	-2.03136	0.0498327	0	-3.91086	1	1
Solyc01g108510	SL3.0ch01	95714052	95716052	-	9413	27651	7698	24475	25.397	23.927	-1.46972	6.56646e-06	0.260752	6.06112	0.448178	1
Solyc01g108540	SL3.0ch01	95723302	95725302	+	29	1216	12	873	2.329	1.356	-0.973385	0.0489411	0.331781	3.55285	0.398032	1
Solyc01g108765	SL3.0ch01	95858681	95860681	-	300	2813	170	1954	9.637	8.004	-1.63324	0.020657	0	-3.91086	1	1
Solyc01g108790	SL3.0ch01	95889454	95891454	+	1784	7817	1462	6827	18.581	17.638	-0.943564	0.0464993	0.430224	-2.13967	0.615596	1
Solyc01g108810	SL3.0ch01	95906602	95908602	-	35	503	12	939	6.506	1.262	-5.24375	8.02914e-08	0	-3.86778	1	1
Solyc01g108830	SL3.0ch01	95909616	95911616	-	49	568	15	371	7.942	3.886	-4.05564	0.00595805	0.711748	-3.76381	1	1
Solyc01g108900	SL3.0ch01	95950288	95952288	-	137	1050	193	1807	11.542	9.65	-1.8917	0.0409622	-1.67438	-1.3436	0.239199	1
Solyc01g109020	SL3.0ch01	96020568	96022568	-	2120	3800	1485	3279	35.811	31.171	-4.63953	4.48255e-07	1.79879	-3.83693	1	1
Solyc01g109030	SL3.0ch01	96019694	96021694	+	2888	5162	1883	4114	35.876	31.399	-4.47674	3.25537e-08	0	-3.91086	1	1
Solyc01g109050	SL3.0ch01	96026505	96028505	-	69	1883	22	1034	3.535	2.083	-1.4515	0.0128459	0.756842	0.727498	0.199627	1
Solyc01g109100	SL3.0ch01	96055868	96057868	+	909	13303	611	10546	6.396	5.476	-0.919621	0.00129199	1.47819	-3.05345	0.38643	1
Solyc01g109130	SL3.0ch01	96086864	96088864	+	4191	7676	3661	7086	35.316	34.065	-1.2511	0.0228309	0.242327	4.92242	0.425152	1
Solyc01g109140	SL3.0ch01	96104945	96106945	+	2269	8555	2010	8402	20.963	19.305	-1.65803	0.00152678	6.69438	3.05954	0.0149794	0.590529
Solyc01g109150	SL3.0ch01	96116671	96118671	+	4757	7209	3625	7576	39.754	32.363	-7.39112	8.23438e-31	0	-2.53314	1	1
Solyc01g109160	SL3.0ch01	96124389	96126389	+	3434	12485	2616	10088	21.572	20.592	-0.979767	0.0210134	-0.233112	1.42888	0.761328	1
Solyc01g109230	SL3.0ch01	96152977	96154977	+	1494	8367	1185	7217	15.151	14.104	-1.04681	0.022795	0.231601	1.25868	0.764746	1
Solyc01g109320	SL3.0ch01	96213628	96215628	-	1481	7390	1176	7334	16.695	13.819	-2.87581	1.55288e-07	1.83465	-0.840941	1	1
Solyc01g109370	SL3.0ch01	96258663	96260663	+	6904	10712	5290	9171	39.192	36.581	-2.61049	1.56116e-06	-0.165138	2.02108	0.786822	1
Solyc01g109390	SL3.0ch01	96274379	96276379	+	4697	6756	5465	8214	41.011	39.952	-1.05934	0.0393823	3.08983	-3.31111	0.456537	1
Solyc01g109440	SL3.0ch01	96303301	96305301	+	1635	12026	1058	10024	11.968	9.547	-2.42136	1.38317e-09	0	-3.65395	1	1
Solyc01g109450	SL3.0ch01	96311932	96313932	-	6839	8438	6423	8265	44.767	43.73	-1.03707	0.032408	0.104484	3.28491	0.772851	1
Solyc01g109540	SL3.0ch01	96365630	96367630	+	251	3554	190	3867	6.597	4.683	-1.91332	0.000159764	-0.118833	7.6487	0.680835	1
Solyc01g109530	SL3.0ch01	96366154	96368154	+	244	5167	165	4842	4.509	3.295	-1.21395	0.000886438	0	-3.91086	1	1
Solyc01g109600	SL3.0ch01	96410244	96412244	+	5104	9545	4262	9650	34.842	30.635	-4.20655	7.57486e-14	-0.278403	5.91631	0.422198	1
Solyc01g109795	SL3.0ch01	96550488	96552488	-	147	1752	8	863	7.741	0.918	-6.82243	4.55075e-16	0	-3.91086	1	1
Solyc01g109810	SL3.0ch01	96581392	96583392	+	872	7888	704	7447	9.954	8.637	-1.31736	0.00190242	-0.125753	3.51209	0.844019	1
Solyc01g109930	SL3.0ch01	96674085	96676085	+	346	2772	129	1991	11.097	6.085	-5.01195	3.89687e-10	-0.110699	4.46661	0.720523	1
Solyc01g109980	SL3.0ch01	96716610	96718610	-	6318	7323	5871	7262	46.316	44.704	-1.61207	0.00449544	-0.153439	5.21466	0.588629	1
Solyc01g110000	SL3.0ch01	96738691	96740691	+	2148	8502	1489	7833	20.169	15.973	-4.19605	3.53397e-14	-0.287148	6.11979	0.552068	1
Solyc01g110360	SL3.0ch01	96996162	96998162	+	65	654	3	113	9.04	2.586	-6.45413	0.00833008	-1.25633	5.3768	0.105067	1
Solyc01g110365	SL3.0ch01	97000309	97002309	-	98	1136	1	196	7.942	0.508	-7.43404	5.62745e-06	-3.03486	-3.80323	0.522422	1
Solyc01g110370	SL3.0ch01	97006412	97008412	-	5113	7703	4919	7789	39.895	38.708	-1.18754	0.0246962	-0.0687272	4.32743	0.864835	1
Solyc01g110480	SL3.0ch01	97091043	97093043	+	2823	10051	2331	9051	21.928	20.48	-1.44821	0.00328374	0.117194	6.753	0.750789	1
Solyc01g110510	SL3.0ch01	97103834	97105834	+	118	1139	37	863	9.387	4.111	-5.27632	1.62745e-06	0.601223	-0.0298139	0.433537	1
Solyc01g110570	SL3.0ch01	97139713	97141713	-	9669	7775	8782	8850	55.429	49.807	-5.62163	2.8179e-25	-0.429982	-3.20909	1	1
Solyc01g110600	SL3.0ch01	97163884	97165884	+	5566	11778	4195	10275	32.092	28.991	-3.10077	2.99082e-09	1.13878	-1.66518	0.413433	1
Solyc01g110720	SL3.0ch01	97238645	97240645	-	26	1029	0	166	2.464	0	-2.46445	0.0187018	0	-3.79645	1	1
Solyc01g110785	SL3.0ch01	97261107	97263107	-	32	1015	20	1094	3.056	1.795	-1.26102	0.0307181	4.35513	-3.65713	0.29491	1
Solyc01g110790	SL3.0ch01	97261449	97263449	-	28	858	17	1016	3.16	1.646	-1.51458	0.0163881	3.59757	-3.45197	0.467607	1
Solyc01g110810	SL3.0ch01	97264586	97266586	-	101	1256	108	1814	7.443	5.619	-1.82374	0.019944	-0.105104	1.8281	0.828316	1
Solyc01g110840	SL3.0ch01	97278407	97280407	+	2796	10806	2494	10366	20.556	19.393	-1.16233	0.00947936	0.302125	-1.84144	0.815617	1
Solyc01g110917	SL3.0ch01	97308806	97310806	+	24	560	7	367	4.11	1.872	-2.23793	0.028547	0.0179087	1.3937	0.970563	1
Solyc01g110930	SL3.0ch01	97314136	97316136	+	62	857	0	40	6.746	0	-6.74646	0.0454574	-1.0018	-2.07389	0.34042	1
Solyc01g110990	SL3.0ch01	97326483	97328483	+	1255	2580	1255	3064	32.725	29.058	-3.66725	0.000250071	0.476149	5.026	0.126766	1
Solyc01g110995	SL3.0ch01	97330068	97332068	+	60	238	0	100	20.134	0	-20.1342	8.70612e-09	-1.03582	-0.352638	0.202457	1
Solyc01g111020	SL3.0ch01	97354556	97356556	-	11281	18762	9903	17772	37.55	35.783	-1.76631	9.27124e-06	-0.697476	5.81617	0.0208408	0.682632
Solyc01g111060	SL3.0ch01	97367095	97369095	+	3564	3857	3681	4301	48.026	46.116	-1.90961	0.00934371	0	-3.91086	1	1
Solyc01g111070	SL3.0ch01	97373896	97375896	+	65	1031	5	356	5.931	1.385	-4.54562	0.000121485	-0.894254	-2.37887	0.452128	1
Solyc01g111090	SL3.0ch01	97390365	97392365	-	46	944	20	663	4.646	2.928	-1.71821	0.0423378	0.118502	5.39009	0.67524	1
Solyc01g111110	SL3.0ch01	97402047	97404047	+	5741	6789	5125	6563	45.818	43.848	-1.96965	0.00124519	0.414625	3.70986	0.464908	1
Solyc01g111190	SL3.0ch01	97442867	97444867	+	8006	10093	6859	9306	44.234	42.431	-1.80331	0.000509885	-0.116754	3.10559	0.768255	1
Solyc01g111210	SL3.0ch01	97453622	97455622	+	622	6518	378	5939	8.711	5.984	-2.72763	1.97707e-09	-1.70204	2.31792	0.00774456	0.418724
Solyc01g111220	SL3.0ch01	97459820	97461820	+	144	2053	80	1662	6.554	4.592	-1.96197	0.00456116	-0.580755	1.95536	0.543313	1
Solyc01g111230	SL3.0ch01	97464217	97466217	+	5875	9056	4966	8919	39.348	35.765	-3.58245	5.02557e-10	0.0282057	5.87202	0.963973	1
Solyc01g111270	SL3.0ch01	97492717	97494717	+	4099	4635	3203	4131	46.932	43.673	-3.25823	2.91832e-05	0.89068	5.43347	0.0384749	0.910767
Solyc01g111360	SL3.0ch01	97548054	97550054	+	1159	12057	712	9624	8.77	6.889	-1.88113	1.08929e-07	-0.0226673	5.04912	0.945453	1
Solyc01g111430	SL3.0ch01	97594119	97596119	-	548	2750	143	1412	16.616	9.196	-7.41999	2.46091e-12	-0.198134	0.74134	0.777375	1
Solyc01g111590	SL3.0ch01	97729226	97731226	-	279	2698	222	2607	9.372	7.847	-1.52455	0.0190062	0.489569	-0.905179	0.680099	1
Solyc01g111610	SL3.0ch01	97744325	97746325	+	526	6726	370	5712	7.253	6.084	-1.16965	0.0040784	0.181577	0.13287	0.826523	1
Solyc01g111640	SL3.0ch01	97765836	97767836	+	3640	8270	2706	6998	30.563	27.885	-2.67714	1.40417e-05	0.801192	-0.328235	0.420529	1
Solyc01g111690	SL3.0ch01	97793493	97795493	+	706	10619	388	11143	6.234	3.365	-2.86915	8.10694e-24	-0.0966175	3.44155	0.772685	1
Solyc01g111700	SL3.0ch01	97803306	97805306	-	53	2747	19	2356	1.893	0.8	-1.09286	0.00049155	1.03051	-1.54587	0.270841	1
Solyc01g111820	SL3.0ch01	97893374	97895374	+	724	9197	439	8946	7.298	4.678	-2.61997	3.22423e-14	0	-3.7556	1	1
Solyc01g111870	SL3.0ch01	97953052	97955052	-	4872	9731	4470	9497	33.363	32.004	-1.359	0.00747038	-0.259218	1.52571	0.619813	1
Solyc01g111880	SL3.0ch01	97963709	97965709	-	1213	6189	831	4650	16.387	15.161	-1.226	0.0278519	-1.40307	3.46359	0.0231837	0.721269
Solyc01g111890	SL3.0ch01	97977788	97979788	-	1692	7744	1322	6722	17.931	16.435	-1.49672	0.00485369	0.0507797	5.39439	0.861156	1
Solyc01g111920	SL3.0ch01	97995256	97997256	+	6266	3727	4974	3139	62.704	61.309	-1.39488	0.0260675	0.00230457	5.54365	0.994402	1
Solyc01g112000	SL3.0ch01	98047263	98049263	+	2890	7751	2611	7540	27.159	25.722	-1.4375	0.00970608	-0.0405295	7.17932	0.935245	1
Solyc01g112020	SL3.0ch01	98064835	98066835	-	8634	7498	7990	7199	53.521	52.604	-0.917094	0.046037	0.170091	6.10726	0.522313	1
Solyc01g112070	SL3.0ch01	98097506	98099506	-	1445	6790	1146	6466	17.547	15.055	-2.49188	1.80063e-05	0.895109	1.01274	0.375733	1
Solyc01g112100	SL3.0ch01	98117373	98119373	-	6092	7829	4864	6821	43.761	41.626	-2.13521	0.000383019	0	-3.91086	1	1
Solyc01g112150	SL3.0ch01	98144638	98146638	-	1361	4104	989	3367	24.904	22.704	-2.19962	0.00612453	0.0412396	5.77666	0.875373	1
Solyc01g112165	SL3.0ch01	98147901	98149901	-	84	1742	9	397	4.6	2.217	-2.38347	0.0137255	-2.56074	-3.76364	0.638942	1
Solyc01g112230	SL3.0ch01	98190390	98192390	-	3110	3505	3163	4095	47.014	43.579	-3.43486	3.90257e-05	-0.470601	1.0446	0.614321	1
Solyc01g112240	SL3.0ch01	98192204	98194204	-	234	2080	159	1791	10.112	8.154	-1.95851	0.014403	0.0644189	3.75565	0.838753	1
Solyc02g043990	SL3.0ch02	235829	237829	+	516	9931	288	8509	4.939	3.274	-1.66537	9.59225e-09	0	-3.91086	1	1
Solyc02g055500	SL3.0ch02	2278761	2280761	+	146	273	189	575	34.845	24.738	-10.1066	0.000181608	0	-3.91086	1	1
Solyc02g055390	SL3.0ch02	3133003	3135003	+	3958	6372	2867	5024	38.316	36.333	-1.98305	0.00345524	1.27253	-3.31633	0.647654	1
Solyc02g050183	SL3.0ch02	4144787	4146787	+	989	5966	743	5021	14.22	12.89	-1.32963	0.0152097	0	-3.76263	1	1
Solyc02g050187	SL3.0ch02	4145219	4147219	+	777	4871	573	4375	13.757	11.58	-2.17665	0.000547222	-1.8288	-2.65209	0.567298	1
Solyc02g050205	SL3.0ch02	4550667	4552667	+	8198	9698	6864	8658	45.809	44.221	-1.58801	0.00207471	0.354488	3.78592	0.379608	1
Solyc02g050287	SL3.0ch02	4957214	4959214	+	429	1809	197	993	19.169	16.555	-2.61428	0.0290306	0.051946	2.79332	0.902844	1
Solyc02g005060	SL3.0ch02	6319657	6321657	+	5034	6321	3493	4648	44.333	42.906	-1.42662	0.022627	0	-3.91086	1	1
Solyc02g005185	SL3.0ch02	7414885	7416885	+	3131	5868	3171	6272	34.793	33.58	-1.21232	0.0378508	0	-3.91086	1	1
Solyc02g005400	SL3.0ch02	8617811	8619811	-	2929	10031	2517	9201	22.6	21.48	-1.12053	0.0170394	0	-3.91086	1	1
Solyc02g005410	SL3.0ch02	8621839	8623839	-	3786	8478	2874	7873	30.871	26.742	-4.12849	8.91523e-12	0	-3.91086	1	1
Solyc02g005490	SL3.0ch02	9306619	9308619	-	1277	9475	1134	9143	11.877	11.034	-0.842512	0.0263096	0	-1.17389	1	1
Solyc02g014140	SL3.0ch02	15646945	15648945	+	2266	5760	1418	3851	28.233	26.912	-1.32111	0.0424013	0	-3.91086	1	1
Solyc02g014180	SL3.0ch02	15743443	15745443	-	328	2792	230	2419	10.513	8.683	-1.8303	0.0101638	0.241687	3.80106	0.726254	1
Solyc02g014183	SL3.0ch02	15743778	15745778	+	256	2239	84	1493	10.261	5.327	-4.93395	1.63159e-08	0	-3.91086	1	1
Solyc02g014290	SL3.0ch02	16183768	16185768	+	3459	5255	2802	4555	39.695	38.086	-1.60857	0.0181348	0	-3.91086	1	1
Solyc02g014400	SL3.0ch02	16680205	16682205	-	852	3079	700	3262	21.674	17.668	-4.00603	6.38431e-06	0	-3.91086	1	1
Solyc02g014545	SL3.0ch02	17612567	17614567	+	2464	7920	2270	8118	23.729	21.852	-1.87668	0.000815845	0	-3.91086	1	1
Solyc02g014640	SL3.0ch02	18050709	18052709	+	1886	4058	1399	3241	31.729	30.151	-1.57861	0.0369765	0	-3.91086	1	1
Solyc02g014775	SL3.0ch02	18994007	18996007	+	2594	4105	1841	3117	38.722	37.132	-1.59029	0.0369415	0	-3.91086	1	1
Solyc02g014820	SL3.0ch02	19014781	19016781	+	2450	4787	1710	3652	33.854	31.891	-1.96272	0.0108168	0	-3.91086	1	1
Solyc02g014830	SL3.0ch02	19115380	19117380	-	1362	4356	1087	4204	23.82	20.544	-3.2752	2.8133e-05	-0.772464	-3.56723	1	1
Solyc02g014840	SL3.0ch02	19143831	19145831	+	925	3034	264	1801	23.364	12.785	-10.58	3.97486e-23	0.125616	3.1475	0.813096	1
Solyc02g014843	SL3.0ch02	19186284	19188284	+	8009	11094	5474	10586	41.925	34.085	-7.84067	3.83265e-50	-5.96705	-3.04292	0.00237281	0.196006
Solyc02g021050	SL3.0ch02	21880615	21882615	-	476	8675	246	7087	5.202	3.355	-1.84692	7.92276e-09	-0.0994027	4.74956	0.769507	1
Solyc02g021170	SL3.0ch02	22318246	22320246	-	3035	4557	2380	4015	39.976	37.217	-2.75972	0.000551703	0	-3.91086	1	1
Solyc02g021350	SL3.0ch02	22991031	22993031	+	4397	11177	3598	9850	28.233	26.755	-1.47804	0.00281095	0	-1.05344	1	1
Solyc02g021450	SL3.0ch02	23239759	23241759	+	3065	9471	2242	9577	24.45	18.969	-5.48013	1.57323e-24	0	-3.91086	1	1
Solyc02g021630	SL3.0ch02	23802646	23804646	+	5642	5347	4486	5430	51.342	45.24	-6.10224	3.43732e-18	-1.761	-1.96348	0.269057	1
Solyc02g021670	SL3.0ch02	23972136	23974136	+	1125	2725	516	1692	29.221	23.37	-5.85121	6.83288e-07	1.23788	-2.64753	0.400167	1
Solyc02g022910	SL3.0ch02	24879081	24881081	+	1513	5180	1442	5489	22.606	20.805	-1.80063	0.00591559	0	-3.91086	1	1
Solyc02g023990	SL3.0ch02	25170245	25172245	+	10421	6126	9151	6228	62.978	59.503	-3.47496	2.85037e-10	-0.441354	0.875364	0.607686	1
Solyc02g024010	SL3.0ch02	25271859	25273859	+	4203	7526	3931	7536	35.834	34.281	-1.55328	0.00692176	0.0734402	3.05701	0.885595	1
Solyc02g030185	SL3.0ch02	25757472	25759472	-	5883	6576	4852	5870	47.219	45.253	-1.96613	0.00165336	0	-3.91086	1	1
Solyc02g030215	SL3.0ch02	25804382	25806382	+	1550	3282	1484	3853	32.078	27.806	-4.27193	2.45776e-06	-0.264881	-1.9138	0.933116	1
Solyc02g030360	SL3.0ch02	26015699	26017699	+	1736	4697	1409	4444	26.986	24.073	-2.91273	0.000158101	-0.422849	-0.507351	0.504252	1
Solyc02g030470	SL3.0ch02	26471944	26473944	+	2373	2658	2256	2863	47.168	44.071	-3.09645	0.00105824	0	-3.91086	1	1
Solyc02g030510	SL3.0ch02	26761625	26763625	+	4005	4779	3279	4386	45.594	42.779	-2.8154	0.000200658	-4.12052	-3.56247	0.148689	1
Solyc02g030505	SL3.0ch02	26761658	26763658	+	3963	4650	3200	4222	46.012	43.115	-2.89678	0.000170446	0.24708	-2.31629	0.88303	1
Solyc02g030650	SL3.0ch02	27095192	27097192	+	3508	8698	2709	7368	28.74	26.883	-1.85696	0.00124845	0	-3.91086	1	1
Solyc02g031680	SL3.0ch02	27207105	27209105	-	87	3259	56	3103	2.6	1.773	-0.827407	0.0135828	0	-3.91086	1	1
Solyc02g031820	SL3.0ch02	27493717	27495717	-	4150	7492	3372	6414	35.647	34.457	-1.18941	0.03194	0	-3.91086	1	1
Solyc02g031890	SL3.0ch02	27627566	27629566	+	2747	2973	2129	2575	48.024	45.259	-2.76512	0.00285403	-1.05654	-1.86745	0.266899	1
Solyc02g032090	SL3.0ch02	27937575	27939575	-	1223	1758	1327	2588	41.027	33.895	-7.13123	1.91384e-09	0	-3.91086	1	1
Solyc02g032105	SL3.0ch02	28002460	28004460	+	3763	6380	2981	5349	37.099	35.786	-1.31316	0.029911	0	-3.91086	1	1
Solyc02g032250	SL3.0ch02	28537743	28539743	-	1859	11439	988	7947	13.98	11.058	-2.92191	1.80513e-10	0	-3.91086	1	1
Solyc02g032290	SL3.0ch02	28584250	28586250	+	11694	11543	6475	7382	50.325	46.727	-3.59763	3.22475e-11	0	-3.91086	1	1
Solyc02g032333	SL3.0ch02	28722619	28724619	+	227	2702	62	1325	7.75	4.47	-3.28001	2.89264e-05	0	-3.91086	1	1
Solyc02g032410	SL3.0ch02	28930560	28932560	-	4649	9731	2822	7347	32.33	27.751	-4.57862	3.02298e-14	0.460535	-2.6647	0.759509	1
Solyc02g032460	SL3.0ch02	28986711	28988711	-	263	2195	244	2765	10.7	8.109	-2.59075	0.000743446	0.585291	1.69982	0.36265	1
Solyc02g032670	SL3.0ch02	29441374	29443374	-	2714	7660	2566	7931	26.162	24.445	-1.71648	0.00247434	0	-3.91086	1	1
Solyc02g032840	SL3.0ch02	29879984	29881984	-	7289	10341	5361	8122	41.344	39.761	-1.58312	0.00280675	-1.75006	-1.00448	0.174286	1
Solyc02g033040	SL3.0ch02	30182330	30184330	+	6248	7043	5033	6123	47.009	45.115	-1.89452	0.00184218	0.851454	-0.576916	0.280668	1
Solyc02g033050	SL3.0ch02	30190967	30192967	+	4014	6059	4009	6520	39.849	38.076	-1.77331	0.00498514	0	-3.91086	1	1
Solyc02g036170	SL3.0ch02	30675635	30677635	-	928	3575	844	3759	20.608	18.336	-2.27262	0.00352028	0	-3.91086	1	1
Solyc02g036160	SL3.0ch02	30670037	30672037	+	2074	4514	1572	3748	31.481	29.549	-1.93261	0.0118954	0	-3.91086	1	1
Solyc02g036350	SL3.0ch02	31050613	31052613	+	1489	12060	1150	10747	10.99	9.666	-1.32344	0.000375208	1.26912	10.0062	0.0879027	1
Solyc02g038650	SL3.0ch02	31714698	31716698	+	2869	5345	2250	4564	34.928	33.02	-1.90792	0.00732492	0	-3.91086	1	1
Solyc02g038710	SL3.0ch02	31914884	31916884	-	3195	10176	2517	8687	23.895	22.465	-1.42981	0.0045068	-2.56618	-3.63116	0.625551	1
Solyc00g007450	SL3.0ch02	32299960	32301960	+	4349	11754	3460	9883	27.007	25.931	-1.07619	0.0179772	0	-3.91086	1	1
Solyc00g007120	SL3.0ch02	32664863	32666863	-	169	1008	22	300	14.359	6.832	-7.52624	0.000147544	0.0018919	3.37534	0.997769	1
Solyc00g007010	SL3.0ch02	32820702	32822702	+	6615	11467	4845	9660	36.583	33.402	-3.18107	2.87617e-09	-0.270765	4.40867	0.355114	1
Solyc02g060590	SL3.0ch02	33596779	33598779	-	1842	6946	1448	6157	20.96	19.04	-1.9203	0.00135219	0	-3.91086	1	1
Solyc02g060600	SL3.0ch02	33617910	33619910	-	2175	8000	1770	7214	21.376	19.702	-1.67423	0.00250014	0	-3.91086	1	1
Solyc02g061600	SL3.0ch02	33636092	33638092	-	539	1157	336	843	31.781	28.499	-3.28193	0.0292148	0	-3.91086	1	1
Solyc02g061660	SL3.0ch02	33709435	33711435	-	723	2735	380	2517	20.908	13.117	-7.79102	5.35885e-16	0	-3.91086	1	1
Solyc02g061670	SL3.0ch02	33730860	33732860	-	2330	7172	2048	6760	24.521	23.252	-1.26956	0.0209919	0	-3.91086	1	1
Solyc02g061800	SL3.0ch02	33853814	33855814	+	367	4006	243	3278	8.392	6.901	-1.49096	0.00724082	1.62716	-2.84782	0.437463	1
Solyc02g094752	SL3.0ch02	33988025	33990025	+	214	859	118	698	19.944	14.461	-5.4833	0.00111815	0	-3.91086	1	1
Solyc02g061920	SL3.0ch02	34021616	34023616	+	6481	9694	6104	9562	40.068	38.963	-1.10465	0.0212181	0	-3.86883	1	1
Solyc02g061940	SL3.0ch02	34036306	34038306	-	716	2355	663	2991	23.315	18.144	-5.17038	1.85332e-07	0.189148	2.42851	0.656529	1
Solyc02g061980	SL3.0ch02	34061227	34063227	+	4060	10252	3354	9907	28.368	25.292	-3.07559	1.05434e-08	0.18706	6.40189	0.485712	1
Solyc02g062070	SL3.0ch02	34192800	34194800	+	6159	6625	5792	6725	48.177	46.273	-1.90434	0.00147529	0	-3.91086	1	1
Solyc02g062090	SL3.0ch02	34211268	34213268	+	6597	8164	5426	7025	44.692	43.579	-1.11327	0.0302108	1.52009	-1.38358	0.106258	1
Solyc02g062140	SL3.0ch02	34253891	34255891	-	3279	12562	2849	11719	20.699	19.557	-1.14289	0.00694784	-0.255287	5.68631	0.330247	1
Solyc02g062250	SL3.0ch02	34393472	34395472	+	667	2545	358	1913	20.766	15.764	-5.0019	2.53224e-06	0.0758319	5.21884	0.795467	1
Solyc02g062490	SL3.0ch02	34706801	34708801	+	8272	6926	5340	4676	54.428	53.315	-1.11352	0.0373992	0.515429	3.8164	0.269783	1
Solyc02g062560	SL3.0ch02	34831522	34833522	-	8438	10677	6419	8950	44.143	41.766	-2.37745	7.79383e-06	-1.84909	1.15717	0.00772246	0.41851
Solyc02g062580	SL3.0ch02	34845408	34847408	+	31	604	5	258	4.882	1.901	-2.98075	0.0190266	0.38416	1.68458	0.396356	1
Solyc02g062590	SL3.0ch02	34857393	34859393	-	3171	11265	2398	10866	21.966	18.079	-3.88691	1.71806e-15	-2.65321	-3.3412	0.188877	1
Solyc02g062610	SL3.0ch02	34876894	34878894	-	3621	9545	3179	9345	27.503	25.383	-2.11939	8.54121e-05	-0.899805	2.32769	0.0297764	0.807559
Solyc02g062710	SL3.0ch02	34989102	34991102	+	6948	9863	6123	9192	41.33	39.98	-1.34967	0.00730475	-0.252058	0.792551	0.839117	1
Solyc02g094755	SL3.0ch02	35014112	35016112	+	8371	6267	6693	5626	57.187	54.331	-2.85607	2.29531e-06	3.49313	-3.08582	0.323593	1
Solyc02g062800	SL3.0ch02	35127081	35129081	-	585	6039	464	5926	8.832	7.261	-1.57018	0.000633622	0.430209	4.16484	0.351397	1
Solyc02g062830	SL3.0ch02	35208234	35210234	+	2461	4825	1359	3373	33.777	28.719	-5.05775	7.26166e-09	0	-3.6388	1	1
Solyc02g062860	SL3.0ch02	35342164	35344164	-	3190	8670	2564	9224	26.897	21.751	-5.1462	9.56452e-20	0	-3.91086	1	1
Solyc02g062960	SL3.0ch02	35481648	35483648	-	5549	9794	4652	8807	36.166	34.564	-1.6021	0.00264292	-7.95026	-2.09695	0.00152466	0.146798
Solyc02g063090	SL3.0ch02	35699013	35701013	+	315	1606	269	1750	16.398	13.323	-3.07428	0.00388451	0.208087	6.32039	0.447384	1
Solyc02g063100	SL3.0ch02	35711354	35713354	-	748	837	4	372	47.192	1.064	-46.1286	4.89268e-81	0	-3.83186	1	1
Solyc02g063110	SL3.0ch02	35711930	35713930	-	23	763	5	567	2.926	0.874	-2.05208	0.00564549	0	-3.91086	1	1
Solyc02g063125	SL3.0ch02	35711806	35713806	+	299	842	5	567	26.205	0.874	-25.331	2.31321e-50	0	-3.76338	1	1
Solyc02g063210	SL3.0ch02	35813730	35815730	-	1883	5564	1063	4400	25.285	19.458	-5.82718	1.1412e-14	-3.61567	-3.72598	0.414927	1
Solyc02g063270	SL3.0ch02	35878605	35880605	-	8520	9704	6665	8024	46.752	45.374	-1.37745	0.00666616	0.0520075	6.80791	0.846346	1
Solyc02g063330	SL3.0ch02	35941051	35943051	+	4002	10515	3259	9207	27.568	26.143	-1.42457	0.0046157	-0.581375	0.709114	0.298068	1
Solyc02g063500	SL3.0ch02	36130354	36132354	+	3563	7044	2938	6335	33.591	31.683	-1.90764	0.00248401	0	-3.91086	1	1
Solyc02g064550	SL3.0ch02	36242720	36244720	-	1611	5299	1389	5667	23.314	19.685	-3.62866	1.88372e-07	-0.260773	4.75416	0.355341	1
Solyc02g064570	SL3.0ch02	36248298	36250298	-	3613	11412	3298	11840	24.047	21.786	-2.26036	2.81332e-06	0	-3.8303	1	1
Solyc02g064640	SL3.0ch02	36305406	36307406	-	5531	5993	6310	7240	47.995	46.568	-1.42722	0.0122748	-0.0879249	-3.16583	1	1
Solyc02g064650	SL3.0ch02	36305411	36307411	-	5565	5968	6352	7289	48.253	46.566	-1.68734	0.00424167	-0.651488	0.308934	0.362506	1
Solyc02g064670	SL3.0ch02	36315954	36317954	+	2883	3829	3076	4540	42.953	40.389	-2.56426	0.0011904	0.284885	7.19699	0.353706	1
Solyc02g064770	SL3.0ch02	36446337	36448337	+	4183	11163	3384	9915	27.258	25.446	-1.8124	0.000344313	-2.32432	-0.204043	0.0532089	1
Solyc02g064790	SL3.0ch02	36467735	36469735	-	4304	12534	3558	10954	25.561	24.518	-1.04359	0.0166262	0	-3.91086	1	1
Solyc02g064804	SL3.0ch02	36522282	36524282	-	48	414	3	134	10.39	2.19	-8.19983	0.000866452	4.50122	-3.08174	0.0769676	1
Solyc02g064810	SL3.0ch02	36522282	36524282	-	48	414	3	134	10.39	2.19	-8.19983	0.000866452	-1.66322	-3.21676	0.541256	1
Solyc02g064830	SL3.0ch02	36526903	36528903	-	3981	10078	2929	7846	28.316	27.183	-1.13309	0.0228513	1.77769	2.77962	0.120138	1
Solyc02g064850	SL3.0ch02	36542771	36544771	-	3884	9432	3138	8618	29.168	26.693	-2.47517	1.08551e-05	0	-3.91086	1	1
Solyc02g064910	SL3.0ch02	36577004	36579004	+	8605	7923	7273	8321	52.063	46.64	-5.42343	9.69105e-22	0	-3.91086	1	1
Solyc02g064920	SL3.0ch02	36585452	36587452	-	5047	5351	4561	5336	48.538	46.085	-2.45351	0.000319873	0	-3.91086	1	1
Solyc02g064955	SL3.0ch02	36616977	36618977	-	3770	7569	3005	7120	33.248	29.679	-3.56907	2.19591e-08	0	-3.91086	1	1
Solyc02g064990	SL3.0ch02	36690113	36692113	-	4913	9698	4091	9266	33.625	30.628	-2.99722	9.09713e-08	0.245586	3.65387	0.49228	1
Solyc02g065210	SL3.0ch02	36954260	36956260	-	3434	3445	3259	3495	49.92	48.253	-1.66716	0.0246527	0	-3.91086	1	1
Solyc02g065290	SL3.0ch02	37017875	37019875	-	1602	8582	1232	7237	15.731	14.547	-1.18339	0.0126858	-0.414581	-0.471652	0.640325	1
Solyc02g065300	SL3.0ch02	37057038	37059038	+	5528	7132	5718	7873	43.665	42.072	-1.59313	0.00505297	0.104114	7.39444	0.715335	1
Solyc02g065320	SL3.0ch02	37060876	37062876	+	281	953	158	1311	22.771	10.756	-12.0159	1.10244e-16	-3.12474	-2.76245	0.140764	1
Solyc02g094758	SL3.0ch02	37061935	37063935	+	364	1690	166	1447	17.722	10.291	-7.43014	2.02442e-10	-3.68916	-2.83909	0.405623	1
Solyc02g065410	SL3.0ch02	37147617	37149617	-	8119	9267	8284	10003	46.698	45.3	-1.39855	0.00440997	0.605661	1.96958	0.202008	1
Solyc02g065490	SL3.0ch02	37218716	37220716	-	2922	7691	2423	6783	27.532	26.32	-1.21248	0.0260775	-5.07249	-2.01211	0.0260792	0.766807
Solyc02g065560	SL3.0ch02	37285760	37287760	+	4647	10826	3105	8544	30.033	26.655	-3.37831	1.4161e-09	0.627299	2.67908	0.178164	1
Solyc02g065600	SL3.0ch02	37333459	37335459	-	2206	9443	1839	9229	18.937	16.615	-2.32178	4.32931e-06	-1.53933	-2.02729	0.1259	1
Solyc02g065630	SL3.0ch02	37364095	37366095	-	8327	9493	8032	9911	46.728	44.764	-1.96442	0.000135621	0.00229616	5.09915	0.994842	1
Solyc02g065640	SL3.0ch02	37364776	37366776	+	4747	9878	4078	9463	32.458	30.116	-2.34218	1.84966e-05	0	-3.91086	1	1
Solyc02g065680	SL3.0ch02	37407371	37409371	+	9467	11749	8469	11311	44.622	42.816	-1.80601	0.00016308	-0.52795	7.06401	0.104683	1
Solyc02g065730	SL3.0ch02	37453984	37455984	-	6691	10462	5466	9272	39.008	37.088	-1.91995	0.000290528	0	-3.91086	1	1
Solyc02g066830	SL3.0ch02	37545133	37547133	+	1736	6145	1233	5850	22.028	17.408	-4.61978	2.34089e-12	0.113853	3.9194	0.77778	1
Solyc02g066955	SL3.0ch02	37768120	37770120	+	367	2048	325	2138	15.197	13.195	-2.0014	0.0229032	-0.699886	3.09459	0.120759	1
Solyc02g066960	SL3.0ch02	37778692	37780692	+	1581	3189	1200	3045	33.145	28.269	-4.8761	5.45733e-07	-3.00007	-3.21994	0.328783	1
Solyc02g067030	SL3.0ch02	37841247	37843247	-	3067	10679	2563	9963	22.312	20.461	-1.85051	0.000183774	0.15013	5.07319	0.631121	1
Solyc02g067180	SL3.0ch02	37936940	37938940	-	7624	7657	7334	8121	49.892	47.454	-2.43812	1.56927e-05	-0.155006	8.57466	0.625709	1
Solyc02g067380	SL3.0ch02	38148388	38150388	+	3460	6889	2505	6867	33.433	26.729	-6.70463	5.08219e-24	-1.42537	-1.75279	0.178042	1
Solyc02g067420	SL3.0ch02	38177052	38179052	-	5405	12454	4523	11140	30.265	28.877	-1.38788	0.00312293	0.0998818	5.27385	0.72478	1
Solyc02g067450	SL3.0ch02	38217101	38219101	-	1131	3048	908	2753	27.064	24.802	-2.26192	0.0115863	1.9013	-3.87171	1	1
Solyc02g067510	SL3.0ch02	38252770	38254770	+	5083	9683	4922	10255	34.424	32.431	-1.99302	0.000178248	1.76389	-1.14196	0.14683	1
Solyc02g067550	SL3.0ch02	38273104	38275104	+	100	2039	20	1333	4.675	1.478	-3.19689	1.61634e-07	-0.498399	-0.302998	0.603	1
Solyc02g067620	SL3.0ch02	38321925	38323925	-	1831	7317	1415	6883	20.015	17.052	-2.963	4.87407e-07	0.662756	4.40241	0.0480568	0.994919
Solyc02g067630	SL3.0ch02	38329775	38331775	+	5396	4407	4760	4268	55.044	52.725	-2.31952	0.000869494	0	-3.91086	1	1
Solyc02g067640	SL3.0ch02	38335383	38337383	+	898	1819	576	1967	33.051	22.65	-10.4007	1.10652e-16	0	-3.60824	1	1
Solyc02g067670	SL3.0ch02	38368483	38370483	+	349	2429	16	720	12.563	2.174	-10.3891	2.81269e-20	0.0432396	5.85401	0.883037	1
Solyc02g067690	SL3.0ch02	38386602	38388602	-	5209	10163	3708	7576	33.886	32.861	-1.0256	0.0361669	-0.509985	6.19005	0.136704	1
Solyc02g067810	SL3.0ch02	38490263	38492263	+	1956	11545	1440	10211	14.488	12.359	-2.12836	8.09042e-07	0.775509	0.00787978	0.491555	1
Solyc02g067890	SL3.0ch02	38551720	38553720	-	3314	9517	2439	9352	25.828	20.685	-5.1428	5.35975e-21	0.00971685	5.38087	0.974824	1
Solyc02g068120	SL3.0ch02	38731049	38733049	-	2544	10472	2077	9143	19.545	18.512	-1.03359	0.0199931	-0.397507	3.16813	0.634855	1
Solyc02g068125	SL3.0ch02	38731049	38733049	-	2544	10472	2077	9143	19.545	18.512	-1.03359	0.0199931	1.94434	-3.87079	1	1
Solyc02g068160	SL3.0ch02	38762290	38764290	-	4638	7382	3576	7227	38.586	33.102	-5.48377	1.81392e-17	-0.453876	-1.96967	0.691358	1
Solyc02g068330	SL3.0ch02	38867132	38869132	-	97	1730	25	1198	5.309	2.044	-3.2651	2.75123e-06	0.0267178	-1.10971	1	1
Solyc02g068370	SL3.0ch02	38890071	38892071	+	4142	4184	4105	5154	49.748	44.335	-5.41254	1.27877e-12	0.34004	4.62995	0.306603	1
Solyc02g068445	SL3.0ch02	38959122	38961122	-	210	2416	56	1065	7.997	4.996	-3.00141	0.000531169	0.303671	0.667667	0.59204	1
Solyc02g068470	SL3.0ch02	38980727	38982727	-	5234	9091	4321	9411	36.538	31.467	-5.07087	9.60672e-19	5.07566	-0.291293	0.0141481	0.57825
Solyc02g068680	SL3.0ch02	39190314	39192314	+	5130	9758	3526	7300	34.457	32.57	-1.88754	0.00097461	0.627936	5.02217	0.483478	1
Solyc02g068720	SL3.0ch02	39226379	39228379	-	2557	12604	2345	12349	16.866	15.959	-0.906747	0.0169008	0.0230331	3.67463	0.969898	1
Solyc02g068867	SL3.0ch02	39323121	39325121	+	380	2117	140	1043	15.218	11.834	-3.38394	0.00341207	-2.10345	-2.33317	0.244509	1
Solyc02g069070	SL3.0ch02	39611427	39613427	-	1567	3881	1565	4892	28.763	24.237	-4.52559	2.74219e-08	0.173919	2.18578	0.736598	1
Solyc02g069240	SL3.0ch02	39751780	39753780	-	582	11723	432	10798	4.73	3.847	-0.882946	0.000580802	-0.746827	4.30647	0.0496144	1
Solyc02g069310	SL3.0ch02	39805498	39807498	+	2025	7659	2036	8267	20.911	19.761	-1.14955	0.0212676	-0.0347964	5.76724	0.90982	1
Solyc02g069350	SL3.0ch02	39838562	39840562	+	540	2724	217	2376	16.544	8.369	-8.17543	1.83579e-20	-0.0893939	1.68638	0.876324	1
Solyc02g069400	SL3.0ch02	39869785	39871785	+	8264	10263	7472	9907	44.605	42.994	-1.61075	0.00129288	0.150845	3.82633	0.66553	1
Solyc02g069430	SL3.0ch02	39888306	39890306	+	65	699	23	549	8.508	4.021	-4.48687	0.000697891	0.0418787	5.70151	0.94857	1
Solyc02g069490	SL3.0ch02	39928562	39930562	-	740	10385	622	10151	6.652	5.774	-0.877992	0.00394501	-0.975389	-0.32853	0.453085	1
Solyc02g069630	SL3.0ch02	40031044	40033044	+	9201	11430	7862	10616	44.598	42.548	-2.05004	3.50237e-05	-0.0945495	-0.726051	0.927206	1
Solyc02g069650	SL3.0ch02	40063791	40065791	-	59	901	85	1999	6.146	4.079	-2.06714	0.00849835	-0.156187	4.72538	0.589566	1
Solyc02g069740	SL3.0ch02	40114886	40116886	+	2216	12630	1596	10723	14.927	12.956	-1.97098	2.91816e-06	-0.536766	-2.75961	0.809099	1
Solyc02g069840	SL3.0ch02	40234295	40236295	+	4846	9048	3751	7764	34.878	32.575	-2.30346	8.08823e-05	0.397019	4.66324	0.301476	1
Solyc02g069950	SL3.0ch02	40295935	40297935	+	7038	12644	4317	10997	35.759	28.19	-7.56867	5.85074e-50	0.0550682	7.20474	0.823282	1
Solyc02g069960	SL3.0ch02	40308744	40310744	-	3935	6652	3385	6250	37.168	35.132	-2.0359	0.00156612	0	-3.76056	1	1
Solyc02g070000	SL3.0ch02	40367756	40369756	+	3095	10421	2765	9897	22.899	21.837	-1.06179	0.0193936	-0.721646	3.85591	0.0478635	0.994919
Solyc02g070010	SL3.0ch02	40375954	40377954	-	8176	7689	7358	7181	51.535	50.609	-0.926117	0.0470893	0	-3.91086	1	1
Solyc02g070180	SL3.0ch02	40533267	40535267	-	8838	10481	6785	9095	45.748	42.727	-3.02101	1.65676e-08	2.25796	-0.567037	0.185663	1
Solyc02g070190	SL3.0ch02	40535963	40537963	-	2073	3183	1817	3354	39.441	35.138	-4.30237	4.89142e-06	0	-3.91086	1	1
Solyc02g070310	SL3.0ch02	40662617	40664617	-	3725	9651	1871	6558	27.848	22.197	-5.65121	2.89944e-20	0.0786002	9.35392	0.794033	1
Solyc02g070397	SL3.0ch02	40685813	40687813	+	10	448	0	155	2.183	0	-2.18341	0.0330014	-0.342782	-2.17484	0.820868	1
Solyc02g070420	SL3.0ch02	40711836	40713836	-	1416	9019	1154	8720	13.57	11.687	-1.88246	4.12614e-05	0.0277281	-0.261442	0.981247	1
Solyc02g070480	SL3.0ch02	40787291	40789291	+	6902	8601	5625	8371	44.52	40.19	-4.33036	1.11746e-13	0.150003	3.84979	0.706777	1
Solyc02g070483	SL3.0ch02	40788231	40790231	+	5947	5969	4834	5228	49.908	48.042	-1.86555	0.00331064	-0.011428	3.57696	0.976218	1
Solyc02g070510	SL3.0ch02	40803104	40805104	+	5130	11753	4834	11880	30.386	28.922	-1.46373	0.00197094	-0.0319154	6.6353	0.911662	1
Solyc02g070520	SL3.0ch02	40818103	40820103	+	8510	6967	7586	6838	54.985	52.593	-2.39192	2.64083e-05	0.322136	4.85629	0.325883	1
Solyc02g070570	SL3.0ch02	40869633	40871633	+	399	2034	379	2821	16.4	11.844	-4.55576	9.98037e-07	0.206528	8.66759	0.495539	1
Solyc02g070650	SL3.0ch02	40900084	40902084	+	842	2174	742	3032	27.918	19.661	-8.25693	3.94088e-15	0.163748	7.19389	0.629062	1
Solyc02g070740	SL3.0ch02	40938699	40940699	+	1950	7244	1937	7632	21.209	20.242	-0.967035	0.0458847	1.78578	-3.79492	1	1
Solyc02g070760	SL3.0ch02	40949794	40951794	-	1142	5267	769	5129	17.819	13.038	-4.78037	4.12193e-13	-0.908082	2.07981	0.0485476	0.997644
Solyc02g070800	SL3.0ch02	40975015	40977015	-	341	1400	159	820	19.586	16.241	-3.34538	0.0149152	-0.877661	-0.0859586	0.201297	1
Solyc02g070820	SL3.0ch02	40991455	40993455	-	1087	7291	990	7173	12.974	12.128	-0.846563	0.044126	-0.812008	-0.50113	0.312502	1
Solyc02g070850	SL3.0ch02	41001625	41003625	+	5018	5243	4112	4577	48.904	47.324	-1.57941	0.0150927	0.236254	0.311273	0.690259	1
Solyc02g070920	SL3.0ch02	41070017	41072017	-	670	1402	844	2036	32.336	29.306	-3.03035	0.0121338	-0.179091	-1.18514	0.898822	1
Solyc02g070890	SL3.0ch02	41054265	41056265	+	2005	7077	1522	6092	22.077	19.989	-2.08714	0.000619961	0.606118	4.9474	0.275368	1
Solyc02g071000	SL3.0ch02	41085549	41087549	+	238	2951	58	1641	7.463	3.414	-4.04938	6.15864e-09	-4.81553	-0.910736	0.00147445	0.1437
Solyc02g071050	SL3.0ch02	41109197	41111197	-	5038	8800	4917	8957	36.407	35.44	-0.966603	0.0422765	1.29054	4.07224	0.0266349	0.773904
Solyc02g071060	SL3.0ch02	41119078	41121078	-	3863	8880	3166	8809	30.315	26.438	-3.87627	2.39617e-11	-0.0607063	0.997371	0.946055	1
Solyc02g071080	SL3.0ch02	41142703	41144703	-	2803	10571	2430	10266	20.959	19.14	-1.81869	0.000178592	0.977229	6.64659	0.089207	1
Solyc02g071100	SL3.0ch02	41152758	41154758	-	5228	10077	4495	10110	34.159	30.777	-3.38164	6.06936e-10	-0.142655	3.20226	0.812223	1
Solyc02g071130	SL3.0ch02	41180342	41182342	-	1910	10274	1353	8962	15.676	13.117	-2.55948	5.93284e-08	3.12234	0.58249	0.0664308	1
Solyc02g071200	SL3.0ch02	41242089	41244089	+	477	3533	311	2674	11.895	10.419	-1.4765	0.0259618	-0.165377	3.09236	0.72203	1
Solyc02g071270	SL3.0ch02	41328603	41330603	-	3361	7190	3412	7648	31.855	30.85	-1.00489	0.0491605	0.0566538	5.56115	0.864089	1
Solyc02g071285	SL3.0ch02	41347199	41349199	+	7901	9919	5473	7440	44.338	42.384	-1.95418	0.000428244	-0.179047	4.42385	0.653254	1
Solyc02g071370	SL3.0ch02	41411225	41413225	-	1064	2866	939	2877	27.074	24.607	-2.46687	0.00712548	0	-3.91086	1	1
Solyc02g071587	SL3.0ch02	41554898	41556898	-	112	1318	25	647	7.832	3.72	-4.11193	0.000195001	-1.06055	-3.12449	0.648514	1
Solyc02g071595	SL3.0ch02	41567203	41569203	-	970	4128	682	3746	19.027	15.402	-3.62508	2.69718e-06	1.78822	-3.87428	1	1
Solyc02g071685	SL3.0ch02	41615603	41617603	+	118	1220	11	261	8.819	4.044	-4.77502	0.003697	0.287241	-0.280795	0.838272	1
Solyc02g071690	SL3.0ch02	41622175	41624175	+	892	4933	733	4808	15.313	13.229	-2.08465	0.00094538	-3.92584	-3.59898	0.370951	1
Solyc02g071850	SL3.0ch02	41773962	41775962	-	149	615	12	120	19.503	9.091	-10.4117	0.0017826	0	-3.91086	1	1
Solyc02g072020	SL3.0ch02	41895047	41897047	+	26	1309	3	795	1.948	0.376	-1.57163	0.000987749	-0.170733	0.740168	0.796256	1
Solyc02g072140	SL3.0ch02	41992790	41994790	+	1088	10901	874	10311	9.075	7.814	-1.26095	0.000367916	-1.04548	-0.0637429	0.172818	1
Solyc02g072170	SL3.0ch02	42059490	42061490	-	2654	8796	2109	7848	23.179	21.181	-1.99796	0.000314479	-0.114439	1.6577	0.850244	1
Solyc02g072190	SL3.0ch02	42075795	42077795	-	599	10125	497	9591	5.586	4.927	-0.658957	0.0168142	1.79671	-0.512989	0.539979	1
Solyc02g072210	SL3.0ch02	42091037	42093037	+	5472	8947	4761	8136	37.95	36.916	-1.03437	0.0357657	0.476848	2.41083	0.394606	1
Solyc02g072240	SL3.0ch02	42115171	42117171	+	174	2904	98	2126	5.653	4.406	-1.24655	0.0206754	-1.10204	-2.55128	0.579884	1
Solyc02g072305	SL3.0ch02	42157758	42159758	+	183	1257	155	1456	12.708	9.621	-3.08698	0.00423698	-0.0313244	4.80314	0.913165	1
Solyc02g072470	SL3.0ch02	42229429	42231429	+	6523	10757	5249	9076	37.749	36.642	-1.10661	0.0205087	1.39569	1.06347	0.0941808	1
Solyc02g072490	SL3.0ch02	42243957	42245957	+	1301	1020	189	238	56.053	44.262	-11.7911	7.13797e-06	0	-3.91086	1	1
Solyc02g073570	SL3.0ch02	42309473	42311473	+	55710	68096	22400	27891	44.998	44.541	-0.457046	0.0371894	0	-3.69406	1	1
Solyc02g076670	SL3.0ch02	42384310	42386310	+	1530	9828	1177	8466	13.471	12.206	-1.26494	0.00351698	0	-3.87203	1	1
Solyc02g076710	SL3.0ch02	42411647	42413647	-	65	1209	21	1115	5.102	1.849	-3.25345	1.10159e-05	0.944236	9.36955	0.0101057	0.480664
Solyc02g076750	SL3.0ch02	42428238	42430238	-	6554	9554	5190	8542	40.688	37.795	-2.89293	3.38675e-07	-0.0233234	0.712215	0.992111	1
Solyc02g076820	SL3.0ch02	42507194	42509194	+	2557	10787	2143	10285	19.162	17.243	-1.91885	4.96083e-05	0.417332	7.60837	0.170974	1
Solyc02g076855	SL3.0ch02	42547633	42549633	-	2727	8974	2305	8456	23.306	21.42	-1.88576	0.000463931	0	-3.91086	1	1
Solyc02g076860	SL3.0ch02	42550568	42552568	-	653	7397	371	5636	8.112	6.176	-1.93567	1.02291e-05	0	-2.70117	1	1
Solyc02g076980	SL3.0ch02	42631971	42633971	+	2566	10560	2001	9150	19.549	17.945	-1.60441	0.000895757	0.526455	0.2802	0.636725	1
Solyc02g077030	SL3.0ch02	42671786	42673786	+	995	2449	306	1359	28.891	18.378	-10.5124	5.16069e-16	-1.72854	-2.77402	0.243214	1
Solyc02g077190	SL3.0ch02	42748300	42750300	+	5587	9149	5093	9177	37.914	35.69	-2.22369	6.44238e-05	-0.0162804	0.89277	0.986077	1
Solyc02g077150	SL3.0ch02	42753814	42755814	-	531	8933	437	9177	5.611	4.545	-1.06528	0.000540101	0	-3.91086	1	1
Solyc02g077200	SL3.0ch02	42767716	42769716	-	42	493	25	566	7.85	4.23	-3.62035	0.00606194	0	-3.91086	1	1
Solyc02g077220	SL3.0ch02	42789589	42791589	-	6234	9079	5670	8784	40.711	39.228	-1.48261	0.00494615	-1.4394	1.72668	0.0286013	0.794866
Solyc02g077230	SL3.0ch02	42789542	42791542	+	6231	9135	5654	8886	40.551	38.886	-1.66473	0.00194189	-0.527278	0.495622	0.475237	1
Solyc02g077290	SL3.0ch02	42837051	42839051	+	760	4145	656	4365	15.494	13.065	-2.42927	0.000370649	2.88747	-0.811309	0.134737	1
Solyc02g077330	SL3.0ch02	42868287	42870287	+	4617	9190	4095	8618	33.44	32.211	-1.22844	0.0165084	-0.254189	-0.0654744	0.759911	1
Solyc02g077350	SL3.0ch02	42878283	42880283	+	9251	9408	7766	8412	49.579	48.003	-1.57583	0.00193169	0	-2.91301	1	1
Solyc02g077360	SL3.0ch02	42883145	42885145	+	525	9300	301	7663	5.344	3.78	-1.564	6.97854e-07	0	-3.68051	1	1
Solyc02g077420	SL3.0ch02	42929949	42931949	-	196	1784	55	1371	9.899	3.857	-6.04205	1.06049e-11	-0.92501	-3.76322	1	1
Solyc02g077460	SL3.0ch02	42962305	42964305	-	127	2527	101	2756	4.785	3.535	-1.25005	0.0107239	-0.155507	4.22357	0.624681	1
Solyc02g077500	SL3.0ch02	42978099	42980099	-	48	1601	15	1343	2.911	1.105	-1.80629	0.00032167	3.01098	-3.80407	0.520617	1
Solyc02g077520	SL3.0ch02	42983527	42985527	+	3059	7081	2332	6628	30.168	26.027	-4.14087	3.06685e-10	6.25926	0.479907	0.00498185	0.316502
Solyc02g077560	SL3.0ch02	43026002	43028002	+	627	6711	510	6735	8.545	7.039	-1.50523	0.000482038	0.127841	6.55171	0.641865	1
Solyc02g077565	SL3.0ch02	43031923	43033923	+	27	492	21	627	5.202	3.241	-1.96157	0.0453757	0	-3.69406	1	1
Solyc02g077620	SL3.0ch02	43072561	43074561	-	2016	8613	1321	6914	18.967	16.041	-2.92569	1.70946e-07	0.592288	1.28243	0.308182	1
Solyc02g077830	SL3.0ch02	43247351	43249351	+	609	5253	434	4437	10.389	8.91	-1.47907	0.00565544	0	-3.12736	1	1
Solyc02g077860	SL3.0ch02	43267938	43269938	+	1376	7233	1145	7540	15.983	13.184	-2.79962	1.86303e-07	0.0907506	-1.96994	0.957539	1
Solyc02g077920	SL3.0ch02	43313396	43315396	-	4791	6547	3820	5925	42.256	39.2	-3.05654	5.83176e-06	-0.492219	8.34323	0.165853	1
Solyc02g077980	SL3.0ch02	43363611	43365611	-	28	587	4	256	4.553	1.538	-3.01438	0.0147	-0.827339	-1.99039	0.535381	1
Solyc02g078060	SL3.0ch02	43433313	43435313	-	2870	6542	2302	5556	30.493	29.295	-1.198	0.0395142	0	-3.91086	1	1
Solyc02g078080	SL3.0ch02	43438808	43440808	-	1074	3758	918	4230	22.227	17.832	-4.39465	5.04098e-08	0	-3.91086	1	1
Solyc02g078090	SL3.0ch02	43448618	43450618	-	1336	6467	1013	5439	17.122	15.701	-1.42106	0.0116553	0	-3.91086	1	1
Solyc02g078100	SL3.0ch02	43451944	43453944	-	4034	8378	2791	6790	32.501	29.131	-3.37023	9.31724e-08	7.23926	-2.60765	0.0215828	0.693925
Solyc02g078280	SL3.0ch02	43592275	43594275	-	3298	2608	3549	3158	55.842	52.915	-2.92665	0.00065131	0.193307	0.915476	0.726253	1
Solyc02g078300	SL3.0ch02	43614913	43616913	-	3569	10734	2625	9902	24.953	20.955	-3.99807	1.82261e-14	0.169135	3.18192	0.673297	1
Solyc02g078320	SL3.0ch02	43615373	43617373	+	4297	12480	3554	10893	25.612	24.6	-1.01218	0.0191315	0.163842	4.09831	0.699141	1
Solyc02g078400	SL3.0ch02	43667137	43669137	-	3298	11458	2706	10399	22.35	20.649	-1.70162	0.000371485	1.74713	8.94594	0.0104484	0.485901
Solyc02g078530	SL3.0ch02	43763189	43765189	+	3174	13068	2167	9407	19.542	18.723	-0.818929	0.0397265	0.232025	1.91863	0.77624	1
Solyc02g078540	SL3.0ch02	43774469	43776469	-	5605	7516	4556	6896	42.718	39.783	-2.93434	2.94907e-06	0.114433	7.53331	0.720744	1
Solyc02g078650	SL3.0ch02	43883830	43885830	+	2266	11219	1693	9249	16.804	15.472	-1.33136	0.00291502	1.89756	1.80159	1	1
Solyc02g078660	SL3.0ch02	43894728	43896728	-	252	9139	155	7025	2.683	2.159	-0.524646	0.0161848	0.06885	2.30232	0.932396	1
Solyc02g078670	SL3.0ch02	43903546	43905546	-	3540	10693	2946	9564	24.872	23.549	-1.32262	0.00624405	-0.222397	6.43832	0.500427	1
Solyc02g078690	SL3.0ch02	43929001	43931001	-	2152	5149	1775	6070	29.475	22.626	-6.84954	2.81932e-21	-0.0200981	-1.47694	1	1
Solyc02g078720	SL3.0ch02	43952523	43954523	+	730	7161	547	7498	9.251	6.799	-2.45179	1.41655e-08	-0.19168	0.491471	0.77653	1
Solyc02g078780	SL3.0ch02	43985920	43987920	+	3005	10307	2607	9705	22.574	21.174	-1.39915	0.00373754	0.28581	3.25946	0.476207	1
Solyc02g078830	SL3.0ch02	44050079	44052079	+	778	6511	665	6150	10.674	9.758	-0.915731	0.0339817	0.201174	5.66694	0.496542	1
Solyc02g078890	SL3.0ch02	44081891	44083891	+	5574	12092	4512	10569	31.552	29.918	-1.63369	0.000890881	-0.0915585	3.3233	0.925485	1
Solyc02g079160	SL3.0ch02	44325860	44327860	+	2343	6708	2410	7558	25.887	24.177	-1.70927	0.00362875	1.04543	-0.260614	0.315981	1
Solyc02g079270	SL3.0ch02	44424993	44426993	+	1848	4618	1653	4551	28.58	26.644	-1.93617	0.00791822	1.81997	-1.67395	0.125297	1
Solyc02g079277	SL3.0ch02	44432786	44434786	+	111	1375	76	1319	7.47	5.448	-2.02169	0.0139618	-0.243738	-1.23292	0.799391	1
Solyc02g079300	SL3.0ch02	44473014	44475014	-	2537	6379	1630	5401	28.454	23.183	-5.27142	9.41191e-14	-0.112546	4.0533	0.727459	1
Solyc02g079320	SL3.0ch02	44484028	44486028	-	337	848	499	1634	28.439	23.394	-5.04454	0.000917999	-0.599087	1.48707	0.438863	1
Solyc02g079330	SL3.0ch02	44488594	44490594	-	3004	10947	2587	10336	21.533	20.019	-1.51394	0.00134165	-0.015483	0.0280576	0.994406	1
Solyc02g079340	SL3.0ch02	44497290	44499290	-	563	1549	683	2127	26.657	24.306	-2.35115	0.0291968	-0.839612	1.74183	0.3547	1
Solyc02g079430	SL3.0ch02	44552714	44554714	-	4986	6874	4239	6733	42.04	38.635	-3.40577	1.68226e-07	-0.31976	1.14002	0.619218	1
Solyc02g079440	SL3.0ch02	44559562	44561562	-	846	4841	716	5347	14.876	11.809	-3.0667	1.04168e-06	1.78838	-2.62245	1	1
Solyc02g079470	SL3.0ch02	44572037	44574037	-	95	1853	9	440	4.877	2.004	-2.87234	0.00355528	0	-3.91086	1	1
Solyc02g079740	SL3.0ch02	44739284	44741284	+	3349	5459	3012	5878	38.022	33.881	-4.14149	1.1546e-08	0.302725	4.1422	0.378622	1
Solyc02g079790	SL3.0ch02	44789846	44791846	+	5819	7803	5842	8881	42.718	39.679	-3.03825	2.22287e-07	-0.161737	4.71128	0.793235	1
Solyc02g079815	SL3.0ch02	44800118	44802118	-	49	2092	6	578	2.289	1.027	-1.26125	0.0302298	-0.133167	-1.45179	0.901399	1
Solyc02g079860	SL3.0ch02	44828400	44830400	-	240	4950	166	4218	4.624	3.786	-0.837781	0.022149	-0.923243	-1.06697	0.341396	1
Solyc02g079870	SL3.0ch02	44828129	44830129	+	243	5234	177	4670	4.437	3.652	-0.784992	0.0216539	-1.08697	0.583352	0.138387	1
Solyc02g079940	SL3.0ch02	44880776	44882776	+	7321	4252	6113	3720	63.259	62.168	-1.0911	0.0438788	0.528062	-2.65321	0.79177	1
Solyc02g079980	SL3.0ch02	44904074	44906074	-	2269	8495	1968	8850	21.08	18.192	-2.88762	1.03207e-07	0.69667	-0.280561	0.516577	1
Solyc02g080240	SL3.0ch02	45063214	45065214	+	112	1772	148	3003	5.945	4.697	-1.24788	0.0261394	0	-3.91086	1	1
Solyc02g080320	SL3.0ch02	45127544	45129544	-	7979	10446	6598	9159	43.305	41.873	-1.43184	0.00417946	-0.0507031	3.42375	0.916103	1
Solyc02g080300	SL3.0ch02	45111798	45113798	+	52	1718	12	932	2.938	1.271	-1.66667	0.0040168	-0.287057	2.83265	0.583727	1
Solyc02g080330	SL3.0ch02	45131348	45133348	+	632	6929	406	6051	8.359	6.288	-2.07093	2.72621e-06	-1.93933	-3.87098	1	1
Solyc02g080480	SL3.0ch02	45244747	45246747	-	2740	10682	2144	9258	20.414	18.804	-1.61053	0.000920119	0.391987	1.99225	0.571749	1
Solyc02g080710	SL3.0ch02	45422857	45424857	+	4603	8482	4152	8894	35.178	31.826	-3.35184	1.19699e-08	-3.66702	-3.75752	0.44125	1
Solyc02g080755	SL3.0ch02	45449005	45451005	+	3549	9283	2595	7837	27.657	24.875	-2.78204	1.563e-06	0	-3.91086	1	1
Solyc02g080790	SL3.0ch02	45473114	45475114	-	2895	10908	2340	9581	20.974	19.629	-1.34448	0.00412257	0.188982	-1.64262	0.874491	1
Solyc02g080870	SL3.0ch02	45526402	45528402	+	4510	8797	4430	9608	33.892	31.557	-2.33473	3.14505e-05	0.504152	-2.95755	1	1
Solyc02g080890	SL3.0ch02	45549047	45551047	-	1625	10720	1173	10156	13.163	10.354	-2.80927	3.29677e-11	0.331511	4.85464	0.61167	1
Solyc02g080900	SL3.0ch02	45561165	45563165	+	3486	5790	2777	5048	37.581	35.489	-2.09204	0.00270311	-0.416358	1.37111	0.52409	1
Solyc02g080960	SL3.0ch02	45589775	45591775	+	364	2444	286	2668	12.963	9.682	-3.28118	6.45485e-05	-0.221766	0.61578	0.689987	1
Solyc02g081040	SL3.0ch02	45664512	45666512	-	12	154	0	277	7.229	0	-7.22892	5.05905e-06	2.98177	-2.80765	0.115621	1
Solyc02g081180	SL3.0ch02	45793401	45795401	+	4837	8542	3677	7917	36.154	31.715	-4.43899	3.04612e-13	-3.61682	-3.75958	0.440506	1
Solyc02g081430	SL3.0ch02	45958176	45960176	+	3398	11342	2667	10174	23.053	20.769	-2.28351	4.36256e-06	-0.283625	1.99042	0.617059	1
Solyc02g081440	SL3.0ch02	45958176	45960176	+	3398	11342	2667	10174	23.053	20.769	-2.28351	4.36256e-06	-3.57861	-1.93845	0.0117194	0.518146
Solyc02g081470	SL3.0ch02	45983154	45985154	-	1512	8236	889	6390	15.511	12.213	-3.29766	1.04711e-09	0	-3.76702	1	1
Solyc02g081550	SL3.0ch02	46016163	46018163	+	237	2247	216	2674	9.541	7.474	-2.06701	0.00371007	0.108499	4.40884	0.813849	1
Solyc02g081560	SL3.0ch02	46022853	46024853	-	58	1034	5	531	5.311	0.933	-4.37852	3.02196e-06	0	-3.91086	1	1
Solyc02g081570	SL3.0ch02	46027384	46029384	-	2832	6917	2626	7413	29.049	26.158	-2.89115	4.93605e-06	-1.71153	-3.44746	0.608262	1
Solyc02g081650	SL3.0ch02	46073974	46075974	+	284	6103	159	4608	4.447	3.335	-1.1111	0.00187091	-0.060863	4.381	0.846741	1
Solyc02g081700	SL3.0ch02	46110366	46112366	+	183	2659	27	647	6.439	4.006	-2.43319	0.00759848	0.012364	7.61772	0.969542	1
Solyc02g082040	SL3.0ch02	46335344	46337344	+	1229	9928	848	8336	11.016	9.233	-1.78206	2.40435e-05	-4.61559	-3.20875	0.200561	1
Solyc02g082050	SL3.0ch02	46343352	46345352	+	4252	11859	3867	11821	26.392	24.649	-1.74249	0.000245686	-1.08245	-0.463869	0.185397	1
Solyc02g082150	SL3.0ch02	46422261	46424261	-	204	1431	189	1620	12.477	10.448	-2.0293	0.0309944	-1.22566	-0.735414	0.203968	1
Solyc02g082250	SL3.0ch02	46496834	46498834	+	2242	7933	1265	6559	22.034	16.168	-5.8662	1.57249e-22	0.171191	0.492702	0.794091	1
Solyc02g082300	SL3.0ch02	46563892	46565892	+	242	2553	21	1717	8.658	1.208	-7.45003	7.14002e-30	-0.0694396	1.39064	0.894101	1
Solyc02g082315	SL3.0ch02	46570069	46572069	+	33	1004	19	1283	3.182	1.459	-1.72296	0.00372339	1.31136	-2.18809	0.501985	1
Solyc02g082320	SL3.0ch02	46583018	46585018	+	453	936	274	781	32.613	25.972	-6.64183	0.000274837	3.28643	-3.41907	0.455308	1
Solyc02g082330	SL3.0ch02	46584214	46586214	+	357	1601	207	1321	18.233	13.547	-4.68577	0.000142434	1.73319	-0.291374	0.0572232	1
Solyc02g082390	SL3.0ch02	46627406	46629406	-	1888	8417	1714	8961	18.321	16.056	-2.265	1.15346e-05	-4.58641	-3.32695	0.167167	1
Solyc02g082410	SL3.0ch02	46654764	46656764	+	145	5168	91	4325	2.729	2.061	-0.668466	0.0165806	0.344035	-0.0419077	0.65434	1
Solyc02g082440	SL3.0ch02	46694693	46696693	-	7846	10695	6855	9972	42.317	40.738	-1.57893	0.00156654	-0.535015	1.96125	0.326896	1
Solyc02g082460	SL3.0ch02	46726293	46728293	-	9224	11946	8480	11552	43.571	42.332	-1.23882	0.00588629	0.0147221	6.1637	0.955319	1
Solyc02g082880	SL3.0ch02	47080753	47082753	+	2065	9370	1781	9203	18.059	16.214	-1.8441	0.000178592	2.53593	-3.02603	0.64947	1
Solyc02g082960	SL3.0ch02	47117362	47119362	+	326	524	668	1865	38.353	26.372	-11.9811	1.13756e-10	0.701315	-3.40041	0.794008	1
Solyc02g083000	SL3.0ch02	47139946	47141946	+	236	8146	108	5663	2.816	1.871	-0.944131	0.000202591	-1.58613	-2.56339	0.300942	1
Solyc02g083050	SL3.0ch02	47168655	47170655	+	255	425	243	609	37.5	28.521	-8.97887	0.000159785	0.236097	-2.61272	0.891393	1
Solyc02g083260	SL3.0ch02	47271756	47273756	-	345	2572	277	2780	11.827	9.061	-2.76605	0.000330845	-0.0187988	4.67544	0.947194	1
Solyc02g083280	SL3.0ch02	47281088	47283088	+	987	10597	517	6378	8.52	7.498	-1.02219	0.00745114	-0.505763	7.72773	0.173513	1
Solyc02g083410	SL3.0ch02	47380572	47382572	+	1954	5737	1367	4465	25.406	23.44	-1.96668	0.00470694	-0.103787	3.81074	0.794287	1
Solyc02g083440	SL3.0ch02	47401009	47403009	+	925	4242	624	3645	17.902	14.617	-3.28506	1.52972e-05	-3.91762	-3.68723	0.227759	1
Solyc02g083500	SL3.0ch02	47428311	47430311	+	7283	8646	6600	8864	45.722	42.68	-3.04187	6.41759e-08	-0.446177	2.63437	0.305645	1
Solyc02g083510	SL3.0ch02	47436133	47438133	-	3185	10097	2429	8170	23.98	22.917	-1.06257	0.0255218	0.823156	1.16054	0.321402	1
Solyc02g083520	SL3.0ch02	47441139	47443139	+	3639	8318	2718	7122	30.434	27.622	-2.8121	4.87238e-06	0.835218	-2.8956	0.641529	1
Solyc02g083527	SL3.0ch02	47451919	47453919	-	79	3572	47	2939	2.164	1.574	-0.589779	0.0383528	0	-3.91086	1	1
Solyc02g083560	SL3.0ch02	47473673	47475673	+	2433	9951	1915	9149	19.646	17.308	-2.33793	3.75567e-06	0.0676483	4.56843	0.821238	1
Solyc02g083610	SL3.0ch02	47514187	47516187	-	753	11515	370	9325	6.138	3.816	-2.32152	1.00603e-14	-0.603197	-0.404113	0.43263	1
Solyc02g083640	SL3.0ch02	47528426	47530426	-	220	4498	170	5111	4.663	3.219	-1.44391	0.000159413	-1.61848	-3.03807	0.426513	1
Solyc02g083670	SL3.0ch02	47542759	47544759	-	3285	7323	2990	7109	30.967	29.607	-1.3603	0.0165898	0.517789	3.92441	0.228032	1
Solyc02g083690	SL3.0ch02	47553804	47555804	-	3	7	28	1042	30	2.617	-27.3832	0.00132991	-1.37596	-2.44727	0.379994	1
Solyc02g083700	SL3.0ch02	47562625	47564625	-	3422	6929	2402	6133	33.06	28.143	-4.91667	5.87192e-13	-0.375073	6.48279	0.294477	1
Solyc02g083740	SL3.0ch02	47583301	47585301	+	3514	8001	3379	8188	30.517	29.212	-1.3043	0.0151512	-1.32129	2.11849	0.00895408	0.453753
Solyc02g083765	SL3.0ch02	47605124	47607124	-	122	714	42	626	14.593	6.287	-8.30588	1.91213e-07	0.58735	-0.674141	0.408337	1
Solyc02g083790	SL3.0ch02	47618411	47620411	-	136	3533	75	2996	3.707	2.442	-1.26453	0.00180755	0.903766	1.79811	0.0902893	1
Solyc02g083835	SL3.0ch02	47661223	47663223	-	6296	7205	5359	6450	46.634	45.381	-1.25294	0.0222295	-0.0120024	6.54368	0.984115	1
Solyc02g083890	SL3.0ch02	47693325	47695325	+	1125	10330	779	8566	9.821	8.336	-1.48503	0.000149917	-1.10904	-0.229121	0.20312	1
Solyc02g084117	SL3.0ch02	47879052	47881052	-	2884	5896	689	3818	32.847	15.287	-17.56	1.65581e-108	2.64661	0.81211	0.0539986	1
Solyc02g084140	SL3.0ch02	47886872	47888872	-	7	73	0	99	8.75	0	-8.75	0.00177717	0	-3.83015	1	1
Solyc02g084160	SL3.0ch02	47903907	47905907	-	308	2990	181	2188	9.339	7.64	-1.69864	0.0134835	2.21694	0.182331	0.00632541	0.366096
Solyc02g084220	SL3.0ch02	47944563	47946563	-	86	1124	33	998	7.107	3.201	-3.90666	3.0961e-05	0.871458	3.15771	0.0334285	0.857035
Solyc02g084285	SL3.0ch02	47987429	47989429	+	327	2247	201	1724	12.704	10.442	-2.2624	0.0109208	-0.603348	1.14302	0.46652	1
Solyc02g084350	SL3.0ch02	48021709	48023709	-	3083	7177	2411	6858	30.049	26.011	-4.0373	5.12635e-10	0	-3.91086	1	1
Solyc02g084440	SL3.0ch02	48090998	48092998	-	5167	6028	4711	5904	46.155	44.381	-1.77394	0.00465382	0.469923	9.78173	0.317721	1
Solyc02g084500	SL3.0ch02	48232881	48234881	-	432	160	6471	7490	72.973	46.351	-26.6224	8.75971e-37	0.215644	4.72219	0.468648	1
Solyc02g084530	SL3.0ch02	48250719	48252719	+	498	739	906	1611	40.259	35.995	-4.26346	0.00631089	-3.41918	-1.67711	0.0541753	1
Solyc02g084560	SL3.0ch02	48276382	48278382	+	137	2482	92	3047	5.231	2.931	-2.30013	8.04945e-06	-0.281197	2.84886	0.482247	1
Solyc02g084570	SL3.0ch02	48288482	48290482	-	1795	5182	2085	6695	25.727	23.747	-1.98024	0.00248888	-1.82921	-0.702257	0.095289	1
Solyc02g084620	SL3.0ch02	48348714	48350714	-	5188	6496	5428	8301	44.403	39.537	-4.86585	1.00138e-14	-0.436378	4.1958	0.176846	1
Solyc02g084680	SL3.0ch02	48413576	48415576	+	2461	7974	1916	8558	23.584	18.293	-5.29118	1.71647e-20	0.52551	-0.744216	0.610216	1
Solyc02g084720	SL3.0ch02	48462070	48464070	-	1350	7866	1097	8554	14.648	11.367	-3.28174	3.13129e-11	-1.08698	5.83633	0.0144705	0.582053
Solyc02g084840	SL3.0ch02	48559074	48561074	-	1882	7324	2189	9011	20.443	19.545	-0.898546	0.0491605	-0.375049	0.428217	0.818617	1
Solyc02g084890	SL3.0ch02	48590733	48592733	-	2373	2594	4256	6799	47.775	38.498	-9.2769	2.4045e-27	4.16529	6.12622	1.3483e-10	1.30341e-07
Solyc02g084960	SL3.0ch02	48632554	48634554	-	304	6124	333	8597	4.729	3.729	-1.00031	0.00140716	-0.281914	1.42305	0.640748	1
Solyc02g085000	SL3.0ch02	48675124	48677124	-	6415	5601	8842	9521	53.387	48.151	-5.23598	1.3867e-18	0.299241	5.98245	0.285624	1
Solyc02g085070	SL3.0ch02	48718759	48720759	+	200	2392	118	2534	7.716	4.449	-3.26658	7.31347e-07	3.01099	-3.80407	0.520586	1
Solyc02g085090	SL3.0ch02	48725737	48727737	+	362	3574	222	4739	9.197	4.475	-4.72225	1.9634e-18	2.70188	-2.51954	0.168785	1
Solyc02g085100	SL3.0ch02	48733232	48735232	-	46	2090	9	1346	2.154	0.664	-1.48935	0.000267105	-0.664626	4.25811	0.0909367	1
Solyc02g085120	SL3.0ch02	48741413	48743413	-	649	8425	397	7951	7.152	4.756	-2.39667	4.19455e-11	0.762808	-2.21454	0.636348	1
Solyc02g085210	SL3.0ch02	48816157	48818157	+	165	1699	280	3769	8.852	6.915	-1.93664	0.00500963	0	-3.91086	1	1
Solyc02g085250	SL3.0ch02	48858501	48860501	-	4820	9483	5159	11501	33.699	30.966	-2.73284	3.01837e-07	0.539953	4.26641	0.0842104	1
Solyc02g085290	SL3.0ch02	48874960	48876960	-	955	2647	734	2783	26.513	20.87	-5.64299	2.76769e-08	1.88102	2.33383	0.0021428	0.182877
Solyc02g085410	SL3.0ch02	48959442	48961442	+	599	1740	489	2144	25.609	18.572	-7.03726	3.27426e-09	0	-3.87229	1	1
Solyc02g085480	SL3.0ch02	48987069	48989069	+	556	2962	423	2946	15.804	12.556	-3.24878	8.99585e-05	-0.728219	2.21753	0.171954	1
Solyc02g085535	SL3.0ch02	49022316	49024316	-	866	4814	451	3552	15.246	11.267	-3.97993	1.7028e-08	0	-3.86883	1	1
Solyc02g085550	SL3.0ch02	49023141	49025141	-	851	4898	466	4291	14.803	9.796	-5.00648	1.60805e-14	1.89435	-3.59657	1	1
Solyc02g085560	SL3.0ch02	49022124	49024124	+	869	4955	467	3695	14.921	11.221	-3.70045	8.28186e-08	0.189036	4.29054	0.634805	1
Solyc02g085590	SL3.0ch02	49058482	49060482	-	2258	6154	2333	7609	26.843	23.466	-3.3765	1.56032e-07	-0.660844	0.494518	0.519783	1
Solyc02g085655	SL3.0ch02	49121347	49123347	+	68	463	10	283	12.806	3.413	-9.39306	2.76976e-06	0.0316199	1.29156	0.959789	1
Solyc02g085710	SL3.0ch02	49159046	49161046	+	674	3499	561	4006	16.151	12.284	-3.86767	2.36904e-07	0.606099	2.38194	0.201242	1
Solyc02g085720	SL3.0ch02	49162484	49164484	+	96	799	9	271	10.726	3.214	-7.51197	2.85624e-05	-0.255681	0.0479129	0.726176	1
Solyc02g085780	SL3.0ch02	49199954	49201954	-	3636	5706	3724	7747	38.921	32.464	-6.45653	1.51369e-21	0.223909	5.76981	0.406566	1
Solyc02g085790	SL3.0ch02	49200112	49202112	+	3620	5588	3700	7194	39.314	33.964	-5.34999	9.52783e-15	-0.0468551	6.57168	0.866379	1
Solyc02g085850	SL3.0ch02	49271588	49273588	+	235	307	3937	8908	43.358	30.65	-12.7079	1.46132e-09	0.622685	1.18536	0.227817	1
Solyc02g085940	SL3.0ch02	49353695	49355695	-	132	1720	80	2260	7.127	3.419	-3.70863	8.13307e-08	0	-3.91086	1	1
Solyc02g086090	SL3.0ch02	49504355	49506355	-	229	1749	120	1192	11.577	9.146	-2.43101	0.0137978	0	-3.91086	1	1
Solyc02g086140	SL3.0ch02	49540157	49542157	-	245	2563	129	1784	8.725	6.743	-1.98174	0.00703974	0.164001	-0.679072	0.868932	1
Solyc02g086200	SL3.0ch02	49571307	49573307	+	3065	6332	2657	5913	32.617	31.004	-1.61329	0.010575	1.89816	-3.83241	1	1
Solyc02g086240	SL3.0ch02	49596959	49598959	+	5694	7086	5161	7108	44.554	42.065	-2.48862	5.38605e-05	0.126715	7.35097	0.669865	1
Solyc02g086270	SL3.0ch02	49620515	49622515	-	473	9167	303	8098	4.907	3.607	-1.29993	1.32421e-05	0.381706	4.43425	0.622741	1
Solyc02g086370	SL3.0ch02	49666519	49668519	+	7028	9658	6117	9457	42.119	39.277	-2.84214	2.2323e-07	-0.577737	3.2747	0.13853	1
Solyc02g086408	SL3.0ch02	49715662	49717662	-	98	580	311	2755	14.454	10.144	-4.31077	0.00102723	1.83734	-2.99723	1	1
Solyc02g086445	SL3.0ch02	49745021	49747021	+	222	1670	53	791	11.734	6.28	-5.45399	5.82234e-06	0	-3.91086	1	1
Solyc02g086460	SL3.0ch02	49759703	49761703	+	1021	5423	653	5403	15.844	10.783	-5.0615	2.11411e-16	-0.371253	6.55821	0.29966	1
Solyc02g086590	SL3.0ch02	49887257	49889257	-	6583	10989	5959	10769	37.463	35.623	-1.8401	0.000273476	0.179082	3.57684	0.723198	1
Solyc02g086630	SL3.0ch02	49931205	49933205	-	10371	6761	9039	6617	60.536	57.735	-2.80079	2.59814e-07	-0.906229	-0.289437	0.294598	1
Solyc02g086640	SL3.0ch02	49930793	49932793	+	11347	9800	9927	9175	53.658	51.968	-1.68935	0.000449202	1.13146	-0.810741	0.173444	1
Solyc02g086700	SL3.0ch02	49986805	49988805	-	7456	8796	6805	8350	45.877	44.903	-0.974758	0.0378554	8.22559	-1.49699	0.00907212	0.456387
Solyc02g086710	SL3.0ch02	49987859	49989859	+	7598	10184	6434	8978	42.729	41.747	-0.981911	0.0323143	-0.157784	6.39076	0.602074	1
Solyc02g086750	SL3.0ch02	50001734	50003734	+	212	2434	102	2683	8.012	3.662	-4.34962	9.7049e-12	0.126022	5.79802	0.694778	1
Solyc02g086800	SL3.0ch02	50049991	50051991	+	7466	11240	6129	10114	39.912	37.733	-2.17915	2.49363e-05	0.2738	4.09283	0.391912	1
Solyc02g086840	SL3.0ch02	50086030	50088030	-	4207	9049	3569	8746	31.737	28.981	-2.75565	1.63754e-06	-0.269054	-3.44027	1	1
Solyc02g086850	SL3.0ch02	50093905	50095905	+	7589	8819	6171	7601	46.252	44.808	-1.44352	0.00641184	0	-3.91086	1	1
Solyc02g086880	SL3.0ch02	50120390	50122390	+	5555	12569	4586	11900	30.65	27.818	-2.83242	8.81844e-09	-0.281879	8.99482	0.428055	1
Solyc02g087180	SL3.0ch02	50294131	50296131	+	130	4130	56	2807	3.052	1.956	-1.09565	0.00276282	0.15091	3.35873	0.691676	1
Solyc02g087320	SL3.0ch02	50398103	50400103	-	163	1966	152	2358	7.656	6.056	-1.6004	0.0168877	-0.874828	-1.29826	0.362428	1
Solyc02g087330	SL3.0ch02	50404497	50406497	-	6678	8600	5904	8023	43.71	42.392	-1.31743	0.0119005	0.179982	4.78881	0.693868	1
Solyc02g087410	SL3.0ch02	50497951	50499951	-	1884	7898	1871	8502	19.26	18.037	-1.22265	0.0128956	-0.368564	0.367508	0.609383	1
Solyc02g087480	SL3.0ch02	50549900	50551900	+	1030	10227	743	10418	9.15	6.657	-2.49275	7.55982e-12	-0.215554	6.4524	0.58535	1
Solyc02g087600	SL3.0ch02	50611574	50613574	+	129	2528	64	2379	4.855	2.62	-2.23537	2.04575e-05	0.27692	2.25019	0.613735	1
Solyc02g087640	SL3.0ch02	50649655	50651655	-	2716	8884	2455	9197	23.414	21.069	-2.34445	1.43077e-05	0.289412	4.03589	0.336308	1
Solyc02g087650	SL3.0ch02	50652182	50654182	+	4613	3690	4699	3952	55.558	54.317	-1.24081	0.0459393	0	-3.91086	1	1
Solyc02g087710	SL3.0ch02	50673482	50675482	-	31	1358	4	608	2.232	0.654	-1.57823	0.00759106	-0.0130364	6.87383	0.972433	1
Solyc02g087810	SL3.0ch02	50723600	50725600	+	306	3222	191	2493	8.673	7.116	-1.55722	0.0131009	-0.34308	-0.340841	0.665318	1
Solyc02g087850	SL3.0ch02	50750677	50752677	+	1939	8624	1161	6393	18.357	15.369	-2.98719	1.32558e-07	-0.0582308	5.9424	0.892127	1
Solyc02g087870	SL3.0ch02	50782613	50784613	-	3978	8705	3152	7733	31.365	28.957	-2.40754	4.52172e-05	-0.272222	4.57462	0.514362	1
Solyc02g087940	SL3.0ch02	50814610	50816610	+	8731	7340	8915	7886	54.328	53.062	-1.26535	0.0110484	0	-3.91086	1	1
Solyc02g088010	SL3.0ch02	50881791	50883791	-	1678	8143	1377	7868	17.086	14.895	-2.1913	3.03968e-05	0.0526394	4.62827	0.84993	1
Solyc02g088080	SL3.0ch02	50910877	50912877	+	6464	8879	6660	9620	42.13	40.909	-1.22087	0.0139673	-5.4815	-3.08086	0.135628	1
Solyc02g088090	SL3.0ch02	50914676	50916676	+	463	4447	336	4120	9.43	7.54	-1.88934	0.000688945	0.43042	6.51681	0.382186	1
Solyc02g088117	SL3.0ch02	50941928	50943928	+	1080	9346	840	8177	10.359	9.316	-1.04298	0.00819441	0.788722	-1.00525	0.484228	1
Solyc02g088167	SL3.0ch02	50959768	50961768	+	1653	5648	1274	4692	22.641	21.354	-1.28639	0.0347766	-0.661174	-0.523397	0.322471	1
Solyc02g088180	SL3.0ch02	50971104	50973104	+	2230	9638	1939	9134	18.79	17.511	-1.27896	0.00649186	-0.287078	-0.707243	0.805189	1
Solyc02g088210	SL3.0ch02	51005851	51007851	+	7046	4370	5772	3766	61.72	60.516	-1.20456	0.0340026	-0.971811	2.64815	0.092166	1
Solyc02g088400	SL3.0ch02	51128670	51130670	-	791	6395	771	6876	11.008	10.082	-0.925129	0.0313243	0.345752	0.525322	0.537323	1
Solyc02g088510	SL3.0ch02	51218920	51220920	+	3316	8354	2623	7291	28.415	26.458	-1.9572	0.000851183	0.706135	2.78933	0.131684	1
Solyc02g088517	SL3.0ch02	51228634	51230634	-	3727	4379	2169	2967	45.978	42.231	-3.74698	1.95097e-05	-0.698435	1.40846	0.156108	1
Solyc02g088530	SL3.0ch02	51228408	51230408	-	3759	5008	2200	3662	42.877	37.53	-5.34684	1.54652e-10	-0.288351	-0.765151	0.772474	1
Solyc02g088540	SL3.0ch02	51227817	51229817	+	3935	4564	2395	4244	46.3	36.075	-10.2249	6.92043e-36	0.112851	3.73082	0.764313	1
Solyc02g088620	SL3.0ch02	51292469	51294469	-	2389	6152	2091	6275	27.971	24.994	-2.97694	9.94281e-06	0.532124	6.29658	0.0720831	1
Solyc02g088670	SL3.0ch02	51315556	51317556	-	62	1248	54	2162	4.733	2.437	-2.296	0.000259303	-1.97161	-2.87142	0.415337	1
Solyc02g088680	SL3.0ch02	51315408	51317408	+	62	1258	54	2238	4.697	2.356	-2.34095	0.000123669	0	-3.91086	1	1
Solyc02g088740	SL3.0ch02	51359136	51361136	+	4458	8150	4090	8201	35.359	33.276	-2.08212	0.000355856	0.312352	2.34052	0.592516	1
Solyc02g088780	SL3.0ch02	51388690	51390690	-	5503	8452	4832	8427	39.434	36.443	-2.99072	3.86575e-07	0.188031	6.51543	0.468127	1
Solyc02g088790	SL3.0ch02	51405258	51407258	-	38	815	0	112	4.455	0	-4.45487	0.00856023	0.135833	5.61184	0.713085	1
Solyc02g088940	SL3.0ch02	51492304	51494304	+	164	3764	63	3085	4.175	2.001	-2.17388	1.96951e-07	0.204396	5.6008	0.557487	1
Solyc02g088952	SL3.0ch02	51508753	51510753	+	126	1342	103	1659	8.583	5.846	-2.73748	0.00174819	0	-3.91086	1	1
Solyc02g088980	SL3.0ch02	51535908	51537908	+	178	1933	101	1485	8.432	6.368	-2.0638	0.0100613	0.659964	-0.950158	0.60659	1
Solyc02g088987	SL3.0ch02	51542412	51544412	+	318	2513	201	2263	11.233	8.157	-3.07531	0.000120707	0.529148	2.1288	0.291271	1
Solyc02g089010	SL3.0ch02	51546666	51548666	+	358	4191	275	3701	7.87	6.916	-0.953363	0.0429978	0.314347	3.23727	0.478519	1
Solyc02g089040	SL3.0ch02	51570229	51572229	+	3127	11626	2455	12014	21.196	16.967	-4.22838	1.26499e-19	-0.426698	-0.845553	0.745095	1
Solyc02g089130	SL3.0ch02	51651059	51653059	-	2931	5323	2454	6966	35.51	26.051	-9.4591	3.94968e-41	0.142629	2.23909	0.778111	1
Solyc02g089140	SL3.0ch02	51652470	51654470	+	7601	9423	6093	8779	44.649	40.97	-3.67912	5.36572e-11	3.95085	-0.754858	0.15126	1
Solyc02g089150	SL3.0ch02	51656942	51658942	+	3984	7881	3108	6477	33.578	32.426	-1.15208	0.0338873	2.17987	4.1823	3.68766e-06	0.00130594
Solyc02g089175	SL3.0ch02	51698496	51700496	-	4293	13680	3624	13314	23.886	21.396	-2.49015	3.20845e-08	0.20259	5.70085	0.483545	1
Solyc02g089200	SL3.0ch02	51710262	51712262	+	9633	12067	7320	9992	44.392	42.283	-2.1089	2.34291e-05	0.112685	8.60893	0.680645	1
Solyc02g089300	SL3.0ch02	51802589	51804589	-	9457	8609	8350	8559	52.347	49.382	-2.96496	3.51711e-08	0	-3.91086	1	1
Solyc02g089330	SL3.0ch02	51820030	51822030	+	30	804	23	1069	3.597	2.106	-1.4909	0.0234289	0.527415	0.989391	0.459531	1
Solyc02g089340	SL3.0ch02	51822230	51824230	+	57	1567	3	488	3.51	0.611	-2.89885	0.000175721	-0.0139082	3.7662	0.971266	1
Solyc02g089495	SL3.0ch02	51943459	51945459	+	321	2977	95	1084	9.733	8.058	-1.6755	0.0401193	-0.676995	1.28027	0.39703	1
Solyc02g089510	SL3.0ch02	51950172	51952172	+	277	2306	233	2880	10.724	7.485	-3.23922	1.71423e-05	-0.370672	-2.29742	1	1
Solyc02g089610	SL3.0ch02	52006969	52008969	-	217	7325	146	6020	2.877	2.368	-0.509397	0.0314213	0.242442	8.186	0.581062	1
Solyc02g089690	SL3.0ch02	52073973	52075973	+	54	1905	10	1047	2.757	0.946	-1.81043	0.000502502	-0.858656	2.14173	0.161823	1
Solyc02g089700	SL3.0ch02	52079199	52081199	+	668	6391	347	4605	9.463	7.007	-2.45583	1.65985e-06	-4.50795	-3.45142	0.177527	1
Solyc02g089710	SL3.0ch02	52090043	52092043	+	3343	8436	2856	7648	28.381	27.19	-1.19138	0.0226022	0	-3.91086	1	1
Solyc02g089800	SL3.0ch02	52141765	52143765	-	455	3740	271	3603	10.846	6.995	-3.85089	1.81901e-09	0.0251273	5.5872	0.93452	1
Solyc02g089810	SL3.0ch02	52148225	52150225	-	24	547	14	653	4.203	2.099	-2.1042	0.0217024	0.212441	4.69539	0.443004	1
Solyc02g089820	SL3.0ch02	52151386	52153386	-	8081	9561	6104	7843	45.805	43.766	-2.03978	0.000206681	0.0927717	7.05136	0.777161	1
Solyc02g089850	SL3.0ch02	52187975	52189975	+	378	4828	247	4116	7.261	5.661	-1.59961	0.000962779	-0.499046	3.6015	0.161844	1
Solyc02g089860	SL3.0ch02	52200211	52202211	-	2360	8834	1823	8945	21.083	16.93	-4.15293	9.50267e-15	-0.915989	-0.677355	0.459306	1
Solyc02g089870	SL3.0ch02	52200144	52202144	+	2339	8928	1797	8912	20.76	16.78	-3.97946	8.62678e-14	0.154019	4.90539	0.610205	1
Solyc02g089920	SL3.0ch02	52223359	52225359	+	65	1314	8	652	4.714	1.212	-3.50144	2.4465e-05	-1.89768	-3.08204	0.411088	1
Solyc02g089980	SL3.0ch02	52302519	52304519	+	6112	8413	5995	9166	42.079	39.542	-2.53693	7.41485e-06	-0.28657	4.9219	0.374175	1
Solyc02g090043	SL3.0ch02	52340830	52342830	+	170	2785	84	1876	5.753	4.286	-1.46725	0.012482	-0.860088	0.437735	0.207168	1
Solyc02g090080	SL3.0ch02	52357200	52359200	-	8	256	1	180	3.03	0.552	-2.47782	0.0398669	0	-3.91086	1	1
Solyc02g090290	SL3.0ch02	52514020	52516020	+	7111	9160	6460	9070	43.704	41.597	-2.10661	0.000107361	2.08451	-2.63012	0.252813	1
Solyc02g090370	SL3.0ch02	52562822	52564822	+	5397	9339	4312	7981	36.625	35.077	-1.54772	0.00454468	-0.770029	-0.689268	0.517483	1
Solyc02g090505	SL3.0ch02	52675925	52677925	+	501	4481	265	2739	10.056	8.822	-1.23463	0.0323489	-0.161119	-1.7165	0.910153	1
Solyc02g090665	SL3.0ch02	52837239	52839239	-	344	2965	205	2103	10.396	8.882	-1.51374	0.0282019	0	-3.78798	1	1
Solyc02g090770	SL3.0ch02	52918630	52920630	-	2887	8959	2605	9848	24.371	20.919	-3.45244	1.82756e-10	-0.231449	1.28792	0.82055	1
Solyc02g090790	SL3.0ch02	52931317	52933317	-	4262	8772	3296	7254	32.699	31.242	-1.45739	0.0090448	-0.00717641	-3.19468	1	1
Solyc02g090830	SL3.0ch02	52946971	52948971	+	1014	6990	840	7353	12.669	10.253	-2.41601	1.34952e-06	-0.0288202	-3.48879	1	1
Solyc02g090870	SL3.0ch02	52993222	52995222	+	1445	10251	1238	9985	12.355	11.031	-1.32373	0.0011451	0.316341	4.23858	0.445373	1
Solyc02g090890	SL3.0ch02	53012686	53014686	-	1435	8539	1062	7097	14.387	13.016	-1.37111	0.00419844	-0.664362	5.29919	0.127275	1
Solyc02g091000	SL3.0ch02	53086975	53088975	-	1588	5926	1258	5232	21.134	19.384	-1.75022	0.0057415	0.481644	4.62058	0.249345	1
Solyc02g091020	SL3.0ch02	53093915	53095915	-	238	5686	144	4318	4.018	3.227	-0.790303	0.0170136	-0.12023	1.6081	0.876648	1
Solyc08g079210	SL3.0ch02	53126484	53128484	-	2262	5234	2400	5896	30.176	28.93	-1.24649	0.0387458	1.81257	-3.69003	1	1
Solyc02g091280	SL3.0ch02	53263872	53265872	-	267	7532	188	6866	3.424	2.665	-0.758361	0.00412033	-0.326959	6.89043	0.237716	1
Solyc02g091290	SL3.0ch02	53262359	53264359	+	1068	10521	219	8117	9.216	2.627	-6.58848	2.3745e-84	-0.805175	2.66472	0.0696412	1
Solyc02g091330	SL3.0ch02	53299690	53301690	-	108	724	0	109	12.981	0	-12.9808	1.18663e-06	-0.0535832	5.49301	0.86866	1
Solyc02g091390	SL3.0ch02	53326575	53328575	-	49	1085	20	791	4.321	2.466	-1.8549	0.0165161	0.858418	4.56907	0.189263	1
Solyc02g091440	SL3.0ch02	53373401	53375401	-	5658	13009	4218	11317	30.31	27.152	-3.15858	1.9124e-10	1.90131	-3.87171	1	1
Solyc02g091460	SL3.0ch02	53388439	53390439	-	6065	10115	5240	9196	37.485	36.298	-1.18641	0.0155177	0.0860304	4.10424	0.805094	1
Solyc02g091650	SL3.0ch02	53528955	53530955	+	2182	3316	1849	3980	39.687	31.721	-7.96645	2.73961e-18	1.43806	2.91256	0.0788306	1
Solyc02g091660	SL3.0ch02	53543594	53545594	-	108	2827	60	2676	3.68	2.193	-1.48674	0.000604678	0.00134598	3.74863	0.998612	1
Solyc02g091700	SL3.0ch02	53576603	53578603	-	383	4950	230	4279	7.182	5.101	-2.08079	1.52612e-05	0.612641	6.43651	0.118595	1
Solyc02g091740	SL3.0ch02	53634183	53636183	+	130	4123	48	2103	3.057	2.232	-0.825146	0.029307	-0.461113	1.79094	0.36709	1
Solyc02g091790	SL3.0ch02	53642172	53644172	+	149	3169	47	1907	4.491	2.405	-2.08533	6.02267e-05	-0.0825498	4.81799	0.768651	1
Solyc02g091890	SL3.0ch02	53759247	53761247	-	40	1254	0	159	3.091	0	-3.09119	0.00898601	-0.426708	5.00571	0.19793	1
[truncated: 4,149 more rows]

## Sheet: PHYA_hyper_DMP_IG_All
Supplementary Table 12. Total differentially methylated promoters (DMPs) in immature green fruits in all mC contexts
[truncated: 20,789 more rows]

[truncated: 1 more sheets: PHYB1B2_hyper_DMP_IG_All]
