# Supplementary material for: Phytochrome-Mediated Light Perception Affects Fruit Development and Ripening Through Epigenetic Mechanisms
Source: Front Plant Sci. 2022 Apr 28;13:870974. doi: 10.3389/fpls.2022.870974 (PMC9096621; doi:10.3389/fpls.2022.870974)
Supplement: Supplementary file 10 [file Data_Sheet_10.XLSX]

## Sheet: PHYA_hypo_DMP_BK_All
Supplementary Table 13. Total differentially methylated promoters (DMPs) in breaker fruits in all mC contexts
ID	chr	from	to	strand	met_WT	unmet_WT	met_PHYA	unmet_PHYA	X.met_WT	X.met_PHYA	X.diff_PHYA.ctrl	FDR_diff_PHYA.WT	logFC_PHYA	logCPM_PHYA	PValue_PHYA	padj_PHYA
Solyc00g005040	SL3.0ch00	546343	548343	+	6217	7413	6915	9097	45.613	43.186	-2.42626	2.76343e-05	-0.0121004	1.90935	0.990057	1
Solyc00g005450	SL3.0ch00	2464349	2466349	+	1806	5581	1369	4762	24.448	22.329	-2.11921	0.00256942	-5.12548e-15	-3.91086	1	1
Solyc00g006510	SL3.0ch00	4370359	4372359	+	163	177	307	906	47.941	25.309	-22.632	2.45229e-14	-5.12548e-15	-3.91086	1	1
Solyc00g006560	SL3.0ch00	4583304	4585304	-	493	1436	604	2002	25.557	23.177	-2.38	0.0351057	-5.12548e-15	-3.91086	1	1
Solyc00g006590	SL3.0ch00	5032575	5034575	-	1513	5619	1341	5844	21.214	18.664	-2.55036	0.000122146	0.407311	-3.6115	1	1
Solyc00g006680	SL3.0ch00	5629656	5631656	+	49034	42387	15090	13404	53.635	52.959	-0.676862	0.0244647	-0.137646	-3.31508	1	1
Solyc00g006820	SL3.0ch00	5819900	5821900	+	4846	9634	4333	9623	33.467	31.048	-2.41927	1.4011e-05	-1.12822	1.61308	0.333197	1
Solyc00g008160	SL3.0ch00	7159867	7161867	-	1219	871	620	503	58.325	55.209	-3.1161	0.0461234	-5.12548e-15	-3.91086	1	1
Solyc00g009090	SL3.0ch00	7841622	7843622	-	2902	9421	2829	9687	23.549	22.603	-0.946392	0.0396373	-5.12548e-15	-3.59636	1	1
Solyc00g009110	SL3.0ch00	7871111	7873111	+	583	9386	556	10332	5.848	5.107	-0.74159	0.0110196	0.25078	3.27196	0.697214	1
Solyc00g009146	SL3.0ch00	8215570	8217570	-	1231	2161	1111	2172	36.291	33.841	-2.45027	0.020652	-5.12548e-15	-3.87428	1	1
Solyc00g013110	SL3.0ch00	9719089	9721089	-	308	2207	723	6515	12.247	9.989	-2.25757	0.001271	-5.12548e-15	-3.91086	1	1
Solyc00g013120	SL3.0ch00	9726388	9728388	-	1119	1961	1529	5744	36.331	21.023	-15.3082	4.31015e-56	5.18393	-3.0418	0.0765688	0.486104
Solyc00g013130	SL3.0ch00	9727452	9729452	-	2198	6779	2549	17737	24.485	12.565	-11.9195	1.02732e-133	-5.12548e-15	-3.50607	1	1
Solyc00g013133	SL3.0ch00	9727784	9729784	-	2433	7354	3175	20295	24.86	13.528	-11.3316	3.64718e-130	2.56983	-3.38388	0.635576	1
Solyc00g013137	SL3.0ch00	9730078	9732078	-	583	1519	1272	4408	27.735	22.394	-5.34112	1.46472e-06	-2.86373	-3.78951	0.650136	1
Solyc00g013140	SL3.0ch00	9737602	9739602	-	4416	24681	5563	56172	15.177	9.011	-6.16573	1.58812e-159	-0.527305	-1.03249	0.608796	1
Solyc00g013150	SL3.0ch00	9736648	9738648	+	4147	35558	5681	77917	10.445	6.796	-3.64891	3.93578e-102	0.347031	-2.82133	0.821581	1
Solyc00g013155	SL3.0ch00	9739388	9741388	-	1566	10601	2090	25120	12.871	7.681	-5.18988	5.12341e-56	4.84887	-3.15174	0.125542	0.633409
Solyc00g013160	SL3.0ch00	9741809	9743809	-	2564	21159	4091	48147	10.808	7.831	-2.97661	1.204e-38	1.10991	-1.09184	0.243632	0.87907
Solyc00g013170	SL3.0ch00	9740381	9742381	+	2785	16009	3997	41265	14.819	8.831	-5.98775	1.20082e-103	2.88564	-1.39935	0.0104967	0.133801
Solyc00g013180	SL3.0ch00	9744467	9746467	-	2730	14308	3198	36738	16.023	8.008	-8.01519	3.4647e-167	4.81346	-2.83542	0.0287933	0.266462
Solyc00g014810	SL3.0ch00	10115885	10117885	-	471	19843	889	42163	2.319	2.065	-0.253653	0.0230643	-3.29038	-3.76263	0.465131	1
Solyc00g014830	SL3.0ch00	10125614	10127614	-	562	19726	822	46162	2.77	1.75	-1.02058	3.49344e-16	-1.946	-1.51508	0.142128	0.676444
Solyc00g014840	SL3.0ch00	10123786	10125786	+	426	15065	673	39090	2.75	1.693	-1.05746	3.29247e-14	4.04222	-3.38395	0.283537	0.947188
Solyc00g014850	SL3.0ch00	10127315	10129315	-	491	21405	943	49653	2.242	1.864	-0.378635	0.000696065	-5.12548e-15	-3.66397	1	1
Solyc00g014860	SL3.0ch00	10128237	10130237	-	523	23356	981	53360	2.19	1.805	-0.384942	0.000295822	-5.12548e-15	-3.87428	1	1
Solyc00g019620	SL3.0ch00	10819131	10821131	-	2713	19662	3552	32031	12.125	9.982	-2.14284	3.22279e-15	-5.12548e-15	-3.91086	1	1
Solyc00g019630	SL3.0ch00	10819968	10821968	-	6316	57308	7281	101161	9.927	6.714	-3.21288	1.20832e-120	-5.12548e-15	-3.91086	1	1
Solyc00g019730	SL3.0ch00	10829313	10831313	-	4602	41978	6160	68645	9.88	8.235	-1.64503	1.27146e-21	2.88127	-2.0331	0.0752257	0.481509
Solyc00g019740	SL3.0ch00	10830415	10832415	-	5735	52874	7646	80888	9.785	8.636	-1.14896	2.32048e-13	1.28264	-1.30025	0.439806	1
Solyc00g019750	SL3.0ch00	10831749	10833749	-	2072	12004	2421	18064	14.72	11.818	-2.90169	1.58897e-14	-2.39038	-3.27884	0.391935	1
Solyc00g019990	SL3.0ch00	10849082	10851082	+	661	26351	1324	59121	2.447	2.19	-0.25664	0.0114025	-1.97361	-3.1186	0.510709	1
Solyc00g020000	SL3.0ch00	10850676	10852676	+	1213	35372	1661	63235	3.316	2.559	-0.756087	1.39399e-11	3.77541	-3.50132	0.217762	0.833215
Solyc00g020010	SL3.0ch00	10853344	10855344	-	4303	29484	5222	60646	12.736	7.928	-4.80769	4.51445e-125	-2.914	-3.39345	0.26429	0.915034
Solyc00g020020	SL3.0ch00	10851713	10853713	+	1248	36647	1547	68556	3.293	2.207	-1.08656	4.18263e-25	-0.892927	-3.05382	0.849722	1
Solyc00g020030	SL3.0ch00	10854853	10856853	-	5404	29835	6209	63064	15.335	8.963	-6.37219	4.3139e-200	-5.12548e-15	-3.91086	1	1
Solyc00g020040	SL3.0ch00	10854013	10856013	+	5755	29872	6443	65247	16.153	8.987	-7.16617	1.72942e-251	-3.52508	-2.8213	0.115184	0.605868
Solyc00g021630	SL3.0ch00	11015632	11017632	-	1289	41797	1783	73853	2.992	2.357	-0.634348	1.2835e-10	-1.69052	-1.98897	0.314697	0.990326
Solyc00g021650	SL3.0ch00	11017610	11019610	+	800	34111	1269	63636	2.292	1.955	-0.336376	0.000346748	-5.12548e-15	-3.91086	1	1
Solyc00g021655	SL3.0ch00	11037440	11039440	+	2515	1359	3812	2245	64.92	62.935	-1.98453	0.0249841	-5.12548e-15	-3.91086	1	1
Solyc00g022070	SL3.0ch00	11051610	11053610	+	3469	21489	4345	41588	13.899	9.459	-4.43992	5.48862e-69	-5.12548e-15	-3.87283	1	1
Solyc00g022080	SL3.0ch00	11055560	11057560	-	1433	52677	2093	112061	2.648	1.833	-0.814821	1.048e-25	-5.12548e-15	-3.91086	1	1
Solyc00g022100	SL3.0ch00	11059261	11061261	-	814	45142	1579	96820	1.771	1.605	-0.166568	0.0123598	0.655932	-1.54422	0.659435	1
Solyc00g022103	SL3.0ch00	11060109	11062109	-	832	40098	1581	90742	2.033	1.712	-0.320273	5.62696e-05	0.252948	-0.130366	0.759485	1
Solyc00g022107	SL3.0ch00	11072272	11074272	-	3919	13263	3513	13720	22.809	20.385	-2.42345	6.95828e-08	0.688425	-2.03865	0.656727	1
Solyc00g023050	SL3.0ch00	11146810	11148810	-	13885	27075	14045	28670	33.899	32.881	-1.0182	0.00130967	-5.12548e-15	-3.91086	1	1
Solyc00g023570	SL3.0ch00	11184688	11186688	-	652	28708	1111	60496	2.221	1.803	-0.417342	2.41386e-05	-5.12548e-15	-3.87203	1	1
Solyc00g023580	SL3.0ch00	11182928	11184928	+	648	23729	1107	52318	2.658	2.072	-0.58618	6.38697e-07	-3.8013	-3.69406	0.291841	0.958582
Solyc00g023710	SL3.0ch00	11199671	11201671	-	1514	10592	2556	23331	12.506	9.874	-2.63251	6.70264e-14	-5.12548e-15	-3.87428	1	1
Solyc00g025290	SL3.0ch00	11313892	11315892	+	2727	15205	2831	33024	15.207	7.896	-7.31176	1.35676e-142	-1.2282	-1.17448	0.501849	1
Solyc00g025300	SL3.0ch00	11317263	11319263	-	3195	17163	3585	44986	15.694	7.381	-8.31313	2.62421e-225	-5.12548e-15	-3.77034	1	1
Solyc00g025400	SL3.0ch00	11325650	11327650	-	1702	65190	3289	140189	2.544	2.292	-0.252062	0.000360517	-5.12548e-15	-3.7976	1	1
Solyc00g029090	SL3.0ch00	11565899	11567899	-	4030	3574	3706	4328	52.998	46.129	-6.86947	4.2118e-17	-5.12548e-15	-3.91086	1	1
Solyc00g029190	SL3.0ch00	11564413	11566413	+	955	952	1015	1173	50.079	46.389	-3.68926	0.0109686	-5.12548e-15	-3.91086	1	1
Solyc00g030000	SL3.0ch00	11624489	11626489	-	6083	7212	8275	12182	45.754	40.451	-5.30334	4.43076e-21	4.42661	-3.47695	0.113787	0.602326
Solyc00g030100	SL3.0ch00	11623845	11625845	+	12481	12627	18311	20680	49.709	46.962	-2.74714	2.58053e-11	1.81391	-3.62704	1	1
Solyc00g036320	SL3.0ch00	11989966	11991966	+	15314	29750	14745	32564	33.983	31.167	-2.81535	3.76694e-19	3.50659	-2.0378	0.300938	0.969988
Solyc00g036520	SL3.0ch00	11998809	12000809	+	2210	18473	2483	30723	10.685	7.478	-3.20754	8.64568e-36	-5.12548e-15	-3.91086	1	1
Solyc00g040490	SL3.0ch00	12208736	12210736	+	1786	2131	1510	1959	45.596	43.528	-2.06773	0.0381312	-5.12548e-15	-3.91086	1	1
Solyc00g041215	SL3.0ch00	12252041	12254041	-	2336	3716	1940	3847	38.599	33.523	-5.0754	1.52627e-08	-5.12548e-15	-3.91086	1	1
Solyc00g042850	SL3.0ch00	12333955	12335955	+	2406	4090	2671	5385	37.038	33.155	-3.88277	1.30456e-06	-5.12548e-15	-3.87151	1	1
Solyc00g044550	SL3.0ch00	12421120	12423120	+	1223	6855	1428	14859	15.14	8.768	-6.37216	1.44464e-47	-5.12548e-15	-3.91086	1	1
Solyc00g047700	SL3.0ch00	12579094	12581094	-	1758	4571	2054	5897	27.777	25.833	-1.94367	0.00597027	0.161407	7.43509	0.594493	1
Solyc00g048510	SL3.0ch00	12614041	12616041	+	9412	13668	12010	19413	40.78	38.22	-2.55948	2.90383e-09	3.35303	2.93276	6.4258e-05	0.00284201
Solyc00g049210	SL3.0ch00	12653666	12655666	-	227	5206	306	10837	4.178	2.746	-1.43205	1.91486e-06	-0.613908	-3.03956	1	1
Solyc00g049220	SL3.0ch00	12651722	12653722	+	958	31820	1552	70071	2.923	2.167	-0.75579	1.05898e-12	-5.12548e-15	-3.91086	1	1
Solyc00g049520	SL3.0ch00	12668662	12670662	-	52	675	92	2541	7.153	3.494	-3.65857	4.3492e-05	1.02019	4.8933	0.0595548	0.420315
Solyc00g050130	SL3.0ch00	12693606	12695606	+	3878	4503	4699	6203	46.271	43.102	-3.16914	1.21491e-05	2.59423	3.58135	8.58791e-05	0.00352262
Solyc00g050430	SL3.0ch00	12707266	12709266	+	5627	6854	5367	7614	45.085	41.345	-3.73949	3.33044e-09	0.675707	1.55574	0.5227	1
Solyc00g055960	SL3.0ch00	12972185	12974185	+	289	237	98	192	54.943	33.793	-21.1499	1.08583e-08	-5.12548e-15	-3.91086	1	1
Solyc00g056680	SL3.0ch00	13006301	13008301	+	4947	10217	4444	10018	32.623	30.729	-1.89451	0.000373774	-0.773978	1.13422	0.220423	0.838824
Solyc00g060810	SL3.0ch00	13198111	13200111	-	609	1637	183	1514	27.115	10.784	-16.3311	2.11091e-37	0.000384124	7.62728	0.999699	1
Solyc00g068985	SL3.0ch00	13563019	13565019	-	1629	7382	1555	7600	18.078	16.985	-1.09265	0.0281695	-5.12548e-15	-3.91086	1	1
Solyc00g069880	SL3.0ch00	13590952	13592952	+	4770	13352	5154	28025	26.322	15.534	-10.7877	2.88949e-184	-5.12548e-15	-3.91086	1	1
Solyc00g071180	SL3.0ch00	13651920	13653920	-	6315	11877	7414	15467	34.713	32.402	-2.31063	1.0455e-06	2.44699	-0.604256	0.309934	0.983997
Solyc00g072800	SL3.0ch00	13717078	13719078	+	810	22973	1388	51350	3.406	2.632	-0.773916	9.37429e-09	-5.12548e-15	-3.91086	1	1
Solyc00g074830	SL3.0ch00	13805809	13807809	-	2004	1629	2071	1994	55.161	50.947	-4.21391	0.000193866	-5.12548e-15	-3.91086	1	1
Solyc00g094520	SL3.0ch00	14585676	14587676	-	1197	43567	1708	86328	2.674	1.94	-0.733908	7.50769e-17	1.68147	-2.96074	0.408578	1
Solyc00g094530	SL3.0ch00	14586705	14588705	-	1323	45742	1857	92754	2.811	1.963	-0.848232	1.50109e-22	0.487508	-2.86231	0.864925	1
Solyc00g094540	SL3.0ch00	14584899	14586899	+	2458	22110	4020	50745	10.005	7.34	-2.66443	1.83719e-34	0.455564	-3.06611	0.874101	1
Solyc00g094550	SL3.0ch00	14588391	14590391	-	1461	9571	1644	16268	13.243	9.178	-4.06509	6.01713e-26	-5.12548e-15	-3.91086	1	1
Solyc00g096460	SL3.0ch00	14656312	14658312	+	2858	1191	2919	1370	70.585	68.058	-2.52751	0.00767189	0.665424	0.79077	0.356713	1
Solyc00g104337	SL3.0ch00	14954722	14956722	+	207	190	312	396	52.141	44.068	-8.07326	0.00625104	-5.12548e-15	-3.91086	1	1
Solyc00g110370	SL3.0ch00	15166354	15168354	-	2223	11839	1619	13868	15.809	10.454	-5.35463	3.19114e-41	-5.12548e-15	-3.80122	1	1
Solyc00g112190	SL3.0ch00	15230377	15232377	-	4003	6252	3515	7010	39.035	33.397	-5.63794	1.24954e-16	-4.76161	-3.55781	0.17583	0.754177
Solyc00g117653	SL3.0ch00	15444881	15446881	-	425	16252	910	42853	2.548	2.079	-0.469038	0.000456027	-5.12548e-15	-3.83525	1	1
Solyc00g118680	SL3.0ch00	15446465	15448465	-	1380	16031	1137	32743	7.926	3.356	-4.57006	1.83776e-105	2.51059	-3.2667	0.319653	0.995935
Solyc00g121230	SL3.0ch00	15526756	15528756	-	2537	6944	2686	8110	26.759	24.88	-1.8792	0.00164821	-5.12548e-15	-3.91086	1	1
Solyc00g125980	SL3.0ch00	15682094	15684094	+	748	13531	1221	29460	5.238	3.98	-1.2588	4.13136e-09	-5.12548e-15	-3.91086	1	1
Solyc00g125990	SL3.0ch00	15682094	15684094	+	748	13531	1221	29460	5.238	3.98	-1.2588	4.13136e-09	-0.000193474	-0.33344	1	1
Solyc00g126010	SL3.0ch00	15683740	15685740	+	1014	23301	2155	53664	4.17	3.861	-0.309573	0.0219224	-1.55341	-1.72909	0.244472	0.879972
Solyc00g126440	SL3.0ch00	15696169	15698169	-	540	3360	574	4257	13.846	11.882	-1.96456	0.00430275	-5.12548e-15	-3.91086	1	1
Solyc00g135260	SL3.0ch00	15983450	15985450	-	1859	1213	2686	1978	60.514	57.59	-2.92427	0.0066526	-5.12548e-15	-3.87171	1	1
Solyc00g142170	SL3.0ch00	16203631	16205631	-	2187	25359	2595	40263	7.939	6.055	-1.88457	4.12976e-21	-1.49108	-3.69284	0.768034	1
Solyc00g142160	SL3.0ch00	16203089	16205089	-	2762	32457	3306	55527	7.842	5.619	-2.22306	6.01048e-39	-5.12548e-15	-3.86883	1	1
Solyc00g153980	SL3.0ch00	16568348	16570348	+	2596	21379	3214	38403	10.828	7.723	-3.10514	3.6309e-39	1.85014	-3.86959	1	1
Solyc00g154480	SL3.0ch00	16585756	16587756	+	7397	4508	6913	4830	62.134	58.869	-3.26444	4.04096e-07	-5.12548e-15	-3.91086	1	1
Solyc00g157083	SL3.0ch00	16661383	16663383	+	4664	8397	4733	8997	35.709	34.472	-1.2374	0.0191115	-5.12548e-15	-3.91086	1	1
Solyc00g157087	SL3.0ch00	16676764	16678764	+	5	27	56	707	15.625	7.339	-8.28555	0.0452761	-5.12548e-15	-3.29646	1	1
Solyc00g164680	SL3.0ch00	16887526	16889526	+	2385	36329	2786	64754	6.161	4.125	-2.0356	4.86265e-47	0.35701	3.66247	0.421052	1
Solyc00g178340	SL3.0ch00	17279849	17281849	+	2490	5938	2509	7196	29.544	25.853	-3.69172	4.81957e-08	-5.12548e-15	-3.91086	1	1
Solyc00g179240	SL3.0ch00	17306300	17308300	-	15639	34686	16620	38826	31.076	29.975	-1.1009	9.37024e-05	-5.12548e-15	-3.76124	1	1
Solyc00g181240	SL3.0ch00	17363185	17365185	-	1699	27877	2842	56461	5.745	4.792	-0.952185	3.22818e-09	-2.4541	-3.6317	0.669431	1
Solyc00g188857	SL3.0ch00	17772479	17774479	+	3143	9648	3016	11213	24.572	21.196	-3.37582	9.41792e-11	0.0450817	4.88727	0.904182	1
Solyc00g198360	SL3.0ch00	17836080	17838080	-	3831	6292	3639	6831	37.845	34.756	-3.08807	4.84854e-06	-5.12548e-15	-3.91086	1	1
Solyc00g210860	SL3.0ch00	18168651	18170651	-	1511	17110	1702	35390	8.114	4.589	-3.5259	4.04599e-59	-1.76753	-3.83419	1	1
Solyc00g212260	SL3.0ch00	18204316	18206316	+	3316	3880	3407	4299	46.081	44.212	-1.86885	0.0127086	-5.12548e-15	-3.73318	1	1
Solyc00g226760	SL3.0ch00	18575849	18577849	+	30	54	1063	4476	35.714	19.191	-16.5231	0.000334472	-5.12548e-15	-3.33246	1	1
Solyc00g230070	SL3.0ch00	18661095	18663095	-	4693	48263	5744	81476	8.862	6.586	-2.27643	2.56919e-53	-2.7206	-2.95418	0.109375	0.589824
Solyc00g230080	SL3.0ch00	18661507	18663507	-	2543	13063	3758	28232	16.295	11.747	-4.54759	1.78921e-40	-0.709049	-2.12624	0.658598	1
Solyc00g231680	SL3.0ch00	18701854	18703854	-	4166	9834	5380	13735	29.757	28.145	-1.61171	0.00102885	-5.12548e-15	-3.62281	1	1
Solyc00g244280	SL3.0ch00	19012610	19014610	-	820	11091	1515	32209	6.884	4.492	-2.39204	3.37466e-22	3.07356	-3.40015	0.397679	1
Solyc00g244290	SL3.0ch00	19010831	19012831	+	971	15207	1470	36069	6.002	3.916	-2.08605	2.44469e-24	2.37793	-1.54516	0.0733051	0.474311
Solyc00g244300	SL3.0ch00	19011391	19013391	+	804	21327	1704	57699	3.633	2.869	-0.764371	5.02344e-08	0.538497	-2.18287	0.733783	1
Solyc00g249900	SL3.0ch00	19145298	19147298	+	1002	823	922	934	54.904	49.677	-5.22739	0.0011148	1.85242	-2.9852	1	1
Solyc00g254110	SL3.0ch00	19246090	19248090	+	40	29	268	446	57.971	37.535	-20.436	0.000870044	-5.12548e-15	-3.91086	1	1
Solyc00g281110	SL3.0ch00	19877327	19879327	-	344	6747	557	15307	4.851	3.511	-1.34013	2.38822e-06	4.04214	-3.67847	0.286958	0.951181
Solyc00g294237	SL3.0ch00	20270253	20272253	+	4102	6473	3586	6365	38.79	36.037	-2.75302	4.46574e-05	-2.77811	-3.44568	0.299854	0.968897
Solyc00g309530	SL3.0ch00	20503857	20505857	+	2087	9182	2339	11843	18.52	16.493	-2.0271	2.33578e-05	-5.12548e-15	-3.91086	1	1
Solyc00g313030	SL3.0ch00	20579072	20581072	+	249	2840	434	6233	8.061	6.51	-1.55119	0.0040634	-5.12548e-15	-3.91086	1	1
Solyc00g320430	SL3.0ch00	20737048	20739048	+	3333	9935	4459	20309	25.121	18.003	-7.11752	1.34212e-57	-5.55785	-3.27111	0.13801	0.665574
Solyc01g005040	SL3.0ch01	53477	55477	+	2845	3752	2787	4602	43.126	37.718	-5.40743	1.77867e-10	1.59575	-0.451464	0.364148	1
Solyc01g005070	SL3.0ch01	63646	65646	+	1220	5123	871	5225	19.234	14.288	-4.94574	4.82287e-13	-5.12548e-15	-3.87249	1	1
Solyc01g005090	SL3.0ch01	89176	91176	-	1215	2586	1200	3544	31.965	25.295	-6.67016	2.94694e-11	-5.12548e-15	-3.91086	1	1
Solyc01g005120	SL3.0ch01	107325	109325	-	909	6840	770	7249	11.731	9.602	-2.12835	1.63328e-05	-0.1123	3.07059	0.839151	1
Solyc01g005130	SL3.0ch01	122769	124769	+	159	2202	43	1274	6.734	3.265	-3.46944	5.75805e-06	0.197357	4.23302	0.595648	1
Solyc01g005230	SL3.0ch01	179576	181576	+	4034	4184	4203	4665	49.087	47.395	-1.69224	0.0154525	3.9898	-0.650203	0.0138526	0.162292
Solyc01g005240	SL3.0ch01	183554	185554	+	4777	9327	4463	9938	33.87	30.991	-2.87892	2.8871e-07	-0.49297	6.14433	0.0832082	0.508147
Solyc01g005270	SL3.0ch01	203236	205236	-	5225	5521	4241	6699	48.623	38.766	-9.85675	4.10941e-47	0.456407	2.46412	0.360907	1
Solyc01g005305	SL3.0ch01	220138	222138	-	549	897	145	444	37.967	24.618	-13.3488	8.8948e-09	-5.12548e-15	-3.91086	1	1
Solyc01g005310	SL3.0ch01	225919	227919	-	2079	4475	1980	5292	31.721	27.228	-4.49336	1.2377e-08	0.616444	-2.32456	0.725523	1
Solyc01g005360	SL3.0ch01	255331	257331	+	1247	7877	852	6432	13.667	11.697	-1.97038	0.000156287	-5.12548e-15	-3.91086	1	1
Solyc01g005400	SL3.0ch01	277103	279103	+	2181	6986	1875	6422	23.792	22.599	-1.19333	0.0334321	-2.79044	2.05404	0.00142876	0.0310636
Solyc01g005410	SL3.0ch01	284692	286692	+	1473	10226	1510	11528	12.591	11.582	-1.00929	0.00913095	-0.313563	2.41792	0.826608	1
Solyc01g005420	SL3.0ch01	294380	296380	-	3098	4623	2625	4305	40.124	37.879	-2.24555	0.00354819	6.84936	3.03024	1.1376e-07	1.77685e-05
Solyc01g005440	SL3.0ch01	307089	309089	+	752	5871	529	4981	11.354	9.601	-1.75365	0.0013096	-0.168118	7.13767	0.637289	1
Solyc01g005450	SL3.0ch01	317520	319520	-	957	3224	771	2984	22.889	20.533	-2.35664	0.00693001	-0.586153	-0.0510021	0.432501	1
Solyc01g005460	SL3.0ch01	321092	323092	-	3297	8398	3630	9943	28.192	26.744	-1.44726	0.00646347	-1.85107	-0.216058	0.0728386	0.473001
Solyc01g005490	SL3.0ch01	340634	342634	-	4148	6099	3630	5615	40.48	39.264	-1.21567	0.0423147	0.238046	5.10328	0.39609	1
Solyc01g005500	SL3.0ch01	342743	344743	+	1324	6870	1166	7469	16.158	13.503	-2.65498	1.54859e-06	9.94414	1.75513	4.94371e-05	0.00232056
Solyc01g005510	SL3.0ch01	348880	350880	-	2827	4737	2910	5246	37.374	35.679	-1.69515	0.0155043	-5.00414	-3.29228	0.145302	0.686273
Solyc01g005520	SL3.0ch01	348023	350023	+	2764	4874	2846	5358	36.187	34.69	-1.49709	0.0264838	-0.237263	4.449	0.502214	1
Solyc01g005530	SL3.0ch01	356524	358524	-	5383	6431	5894	7425	45.565	44.253	-1.31201	0.0203926	0.674058	3.28064	0.0703971	0.464226
Solyc01g005560	SL3.0ch01	392352	394352	+	615	7411	495	7155	7.663	6.471	-1.19201	0.00253812	1.20796	8.1311	6.91745e-05	0.00299907
Solyc01g005600	SL3.0ch01	426353	428353	-	4472	9844	4898	11748	31.238	29.424	-1.81329	0.000423057	-0.415332	6.32429	0.133396	0.653604
Solyc01g005665	SL3.0ch01	459646	461646	+	3700	8067	3677	9043	31.444	28.907	-2.53664	1.59283e-05	4.39994	-2.18294	0.0968986	0.551457
Solyc01g005680	SL3.0ch01	470528	472528	+	5024	9065	4691	9589	35.659	32.85	-2.80888	8.10345e-07	1.92186	-3.62026	1	1
Solyc01g005720	SL3.0ch01	485249	487249	+	1086	2209	972	2219	32.959	30.461	-2.49836	0.0171778	0.898001	1.24495	0.22517	0.847419
Solyc01g005730	SL3.0ch01	488688	490688	+	437	2006	343	1801	17.888	15.998	-1.88971	0.0452472	1.40312	7.85887	0.00743049	0.10371
Solyc01g005810	SL3.0ch01	528366	530366	+	2147	7138	1998	7413	23.123	21.23	-1.89284	0.00138283	0.00492624	6.59137	0.987832	1
Solyc01g005850	SL3.0ch01	573558	575558	+	491	2814	412	2832	14.856	12.7	-2.15591	0.0073594	3.26329	-3.04174	0.375277	1
Solyc01g005890	SL3.0ch01	585983	587983	+	3572	5192	4503	6888	40.758	39.531	-1.22644	0.0402324	-5.12548e-15	-3.87203	1	1
Solyc01g005910	SL3.0ch01	588593	590593	+	3988	8534	4338	10148	31.848	29.946	-1.90179	0.000578686	0.221957	4.94696	0.428355	1
Solyc01g005950	SL3.0ch01	624436	626436	-	4425	7549	2571	5384	36.955	32.319	-4.63577	4.36613e-11	0.195892	5.83825	0.472342	1
Solyc01g005960	SL3.0ch01	623152	625152	+	4582	8743	2723	6620	34.386	29.145	-5.24168	3.23342e-16	0.198833	5.87646	0.462376	1
Solyc01g006180	SL3.0ch01	818879	820879	-	256	1630	276	2537	13.574	9.812	-3.76211	7.0951e-05	-0.384394	3.451	0.300203	0.968897
Solyc01g006195	SL3.0ch01	823637	825637	-	64	1229	54	1594	4.95	3.277	-1.67303	0.0132836	-0.797374	1.99082	0.130406	0.646394
Solyc01g006240	SL3.0ch01	860918	862918	-	368	1907	121	786	16.176	13.341	-2.83514	0.0265101	-0.107393	0.646158	1	1
Solyc01g006250	SL3.0ch01	864064	866064	-	11908	6040	12431	6547	66.347	65.502	-0.845065	0.0444466	-0.271879	1.7532	0.570152	1
Solyc01g006280	SL3.0ch01	871778	873778	+	2280	6952	2107	7437	24.697	22.077	-2.62001	2.3572e-05	-0.192736	7.70616	0.542788	1
Solyc01g006290	SL3.0ch01	882366	884366	+	3166	7976	2535	7048	28.415	26.453	-1.96191	0.00117404	11.009	2.82469	9.32502e-08	1.50922e-05
Solyc01g006300	SL3.0ch01	891334	893334	-	11289	7957	10968	9004	58.656	54.917	-3.73946	2.35814e-13	10.3524	4.22039	1.64703e-07	2.44445e-05
Solyc01g006330	SL3.0ch01	907105	909105	+	4706	9093	4754	10421	34.104	31.328	-2.77608	6.3751e-07	-0.529112	-0.571372	0.69844	1
Solyc01g006360	SL3.0ch01	981297	983297	-	982	6484	712	6917	13.153	9.333	-3.82015	2.95989e-13	-0.133703	4.04951	0.843275	1
Solyc01g006390	SL3.0ch01	1018236	1020236	-	549	3614	348	3368	13.188	9.365	-3.8227	1.33954e-07	7.59049	-2.19871	0.00392533	0.0662151
Solyc01g006400	SL3.0ch01	1022356	1024356	-	5234	7759	4905	7993	40.283	38.029	-2.25408	0.000178416	12.9405	3.30892	1.93989e-08	3.9877e-06
Solyc01g006430	SL3.0ch01	1038597	1040597	-	2067	9868	2414	12453	17.319	16.237	-1.08151	0.0108566	-0.757833	8.24085	0.120956	0.621092
Solyc01g006450	SL3.0ch01	1055679	1057679	+	1945	4838	695	3198	28.675	17.853	-10.8221	1.32342e-35	0.450923	5.61403	0.215882	0.830645
Solyc01g006460	SL3.0ch01	1067132	1069132	-	4082	10058	3122	10246	28.868	23.354	-5.51418	1.90647e-24	-7.97227	-1.07086	3.99801e-05	0.00197515
Solyc01g006470	SL3.0ch01	1072811	1074811	-	1509	5710	1640	6835	20.903	19.351	-1.55214	0.00971127	-5.12548e-15	-3.91086	1	1
Solyc01g006480	SL3.0ch01	1071745	1073745	+	4151	10162	4267	12530	29.002	25.403	-3.59826	3.11496e-12	0.0465224	3.8159	0.886707	1
Solyc01g006530	SL3.0ch01	1102222	1104222	+	4695	6319	4128	6256	42.628	39.753	-2.8741	2.00314e-05	1.80909	-3.87049	1	1
Solyc01g006545	SL3.0ch01	1126682	1128682	-	1142	2793	1026	2849	29.022	26.477	-2.54418	0.00751362	-5.12548e-15	-3.87428	1	1
Solyc01g006550	SL3.0ch01	1126731	1128731	-	1142	2803	1036	2972	28.948	25.848	-3.09973	0.00140897	1.36357	2.21463	0.0707751	0.465689
Solyc01g006565	SL3.0ch01	1139192	1141192	-	3223	3391	2111	2933	48.73	41.852	-6.87826	4.7097e-13	1.79906	-3.20204	1	1
Solyc01g006575	SL3.0ch01	1172601	1174601	+	2665	5608	1690	3996	32.213	29.722	-2.4911	0.00128259	-5.12548e-15	-3.91086	1	1
Solyc01g006600	SL3.0ch01	1207284	1209284	-	7314	8386	7634	9710	46.586	44.015	-2.57077	3.30014e-06	-5.12548e-15	-2.97816	1	1
Solyc01g006620	SL3.0ch01	1219101	1221101	-	1914	8123	2325	10929	19.069	17.542	-1.52757	0.00196656	-5.12548e-15	-3.69072	1	1
Solyc01g006650	SL3.0ch01	1242768	1244768	+	1207	3015	842	2383	28.588	26.109	-2.47982	0.0108078	0.396089	-0.877915	0.821007	1
Solyc01g006710	SL3.0ch01	1282788	1284788	+	10	10	0	102	50	0	-50	2.47732e-09	-0.245667	4.70736	0.422681	1
Solyc01g006720	SL3.0ch01	1309933	1311933	-	3526	9475	3932	11367	27.121	25.701	-1.41996	0.0045074	1.30571	1.46433	0.0450016	0.354229
Solyc01g006755	SL3.0ch01	1344209	1346209	-	4172	9427	4451	10593	30.679	29.587	-1.09218	0.0238336	-5.12548e-15	-3.91086	1	1
Solyc01g006780	SL3.0ch01	1360056	1362056	-	5289	6191	5447	6663	46.071	44.979	-1.09207	0.0468623	-5.12548e-15	-1.86124	1	1
Solyc01g006790	SL3.0ch01	1358218	1360218	+	3454	5315	3390	6296	39.389	34.999	-4.38979	1.47241e-09	3.13451	-0.794035	0.299037	0.968009
Solyc01g006810	SL3.0ch01	1370832	1372832	+	5353	6334	5571	7248	45.803	43.459	-2.3441	0.000195911	0.634548	4.12271	0.0634899	0.435373
Solyc01g006890	SL3.0ch01	1462996	1464996	+	4876	9899	4729	10835	33.002	30.384	-2.61747	1.2516e-06	-0.17619	2.94066	0.752344	1
Solyc01g006910	SL3.0ch01	1484657	1486657	-	5143	7808	4120	6884	39.711	37.441	-2.27029	0.000266138	-5.12548e-15	-3.91086	1	1
Solyc01g006920	SL3.0ch01	1485514	1487514	+	7759	9220	6342	8160	45.698	43.732	-1.96573	0.000382851	0.0467091	0.315771	1	1
Solyc01g006980	SL3.0ch01	1549134	1551134	+	1441	3563	1175	4094	28.797	22.3	-6.49672	1.3379e-13	0.457777	5.25067	0.106853	0.582434
Solyc01g007000	SL3.0ch01	1565382	1567382	+	2450	8022	2330	8498	23.396	21.518	-1.87744	0.000805203	7.65418	3.34072	9.76697e-06	0.000646935
Solyc01g007010	SL3.0ch01	1568975	1570975	+	2319	5039	2249	5933	31.517	27.487	-4.02955	5.65861e-08	11.2846	2.58387	4.37876e-07	5.30913e-05
Solyc01g007030	SL3.0ch01	1582763	1584763	-	3759	6384	2345	6032	37.06	27.993	-9.06673	6.15208e-38	7.77257	4.20892	1.71204e-07	2.50968e-05
Solyc01g007040	SL3.0ch01	1583263	1585263	-	5270	9344	3562	8244	36.061	30.171	-5.89021	3.8803e-23	11.534	3.13121	3.80488e-10	1.47927e-07
Solyc01g007050	SL3.0ch01	1591140	1593140	-	3480	9056	3367	10008	27.76	25.174	-2.58622	2.91205e-06	4.68495	-3.22548	0.152272	0.70309
Solyc01g007130	SL3.0ch01	1673642	1675642	+	5649	9784	5394	10217	36.603	34.553	-2.05082	0.000140624	-0.0250177	3.88865	0.955225	1
Solyc01g007200	SL3.0ch01	1771389	1773389	+	4729	7322	5726	9272	39.242	38.178	-1.06313	0.0380022	0.259388	-0.127686	0.756416	1
Solyc01g007210	SL3.0ch01	1776170	1778170	+	1368	3059	1101	2746	30.901	28.62	-2.28158	0.014293	2.62794	-3.44584	0.67428	1
Solyc01g007260	SL3.0ch01	1823385	1825385	-	6861	7397	7937	9368	48.12	45.865	-2.255	6.09028e-05	-0.472685	0.0845083	0.62704	1
Solyc01g007750	SL3.0ch01	1844890	1846890	+	6453	5711	7562	7125	53.05	51.488	-1.56227	0.00680096	-0.0882781	3.16344	0.842937	1
Solyc01g007770	SL3.0ch01	1860634	1862634	+	10050	10444	11574	12523	49.039	48.031	-1.00787	0.0188325	-5.12548e-15	-3.91086	1	1
Solyc01g007790	SL3.0ch01	1872921	1874921	+	8640	8388	9238	9897	50.74	48.278	-2.46193	3.51195e-06	0.415689	4.89638	0.157866	0.714661
Solyc01g007800	SL3.0ch01	1888876	1890876	+	5890	9514	5735	10020	38.237	36.401	-1.83568	0.0006403	-5.12548e-15	-3.65929	1	1
Solyc01g007855	SL3.0ch01	1947915	1949915	+	22	111	33	370	16.541	8.189	-8.35277	0.00518497	-0.849814	2.36161	0.06136	0.426823
Solyc01g007895	SL3.0ch01	2021766	2023766	-	1229	7590	863	8589	13.936	9.13	-4.80548	1.62815e-23	2.25049	-2.088	0.301454	0.970721
Solyc01g007920	SL3.0ch01	2047562	2049562	+	5212	7873	4762	8600	39.832	35.638	-4.19349	5.29788e-12	0.323912	5.83983	0.286082	0.950664
Solyc01g007990	SL3.0ch01	2102280	2104280	+	7171	9658	7528	10652	42.611	41.408	-1.20283	0.0131331	0.65189	3.79441	0.155824	0.710906
Solyc01g008050	SL3.0ch01	2132652	2134652	+	778	5513	630	5744	12.367	9.884	-2.48297	9.5481e-06	8.14645	-1.17019	0.000638511	0.0169801
Solyc01g008080	SL3.0ch01	2157582	2159582	-	5556	7160	5644	9334	43.693	37.682	-6.01105	2.44426e-23	0.606321	6.32182	0.101665	0.566939
Solyc01g008100	SL3.0ch01	2162618	2164618	+	5849	10492	5048	11635	35.793	30.258	-5.53506	1.03374e-25	0.32638	4.58042	0.318519	0.995256
Solyc01g008110	SL3.0ch01	2172523	2174523	+	8456	10012	8335	10730	45.787	43.719	-2.06845	5.22667e-05	-0.0926692	6.84571	0.742371	1
Solyc01g008140	SL3.0ch01	2225510	2227510	-	2724	9855	2998	11947	21.655	20.06	-1.59492	0.000897218	-0.468609	4.60611	0.114929	0.605654
Solyc01g008160	SL3.0ch01	2239912	2241912	-	5474	6255	5528	6852	46.671	44.653	-2.01798	0.00120499	0.369676	4.02135	0.341208	1
Solyc01g008220	SL3.0ch01	2289692	2291692	-	9234	8115	9592	10142	53.225	48.606	-4.6185	3.5677e-18	1.91666	2.42571	0.00316909	0.0562541
Solyc01g008260	SL3.0ch01	2313051	2315051	+	7534	9983	7279	10071	43.01	41.954	-1.05576	0.0247842	0.312572	3.71261	0.395742	1
Solyc01g008440	SL3.0ch01	2455095	2457095	+	2086	7947	2319	10326	20.791	18.339	-2.45212	4.46481e-06	-0.536096	4.55181	0.163419	0.726749
Solyc01g008471	SL3.0ch01	2487945	2489945	+	2542	3020	3787	5567	45.703	40.485	-5.21763	9.73902e-10	-5.12548e-15	-3.64543	1	1
Solyc01g008497	SL3.0ch01	2548843	2550843	-	9756	7223	11282	8702	57.459	56.455	-1.00405	0.02775	-0.938919	-0.116818	0.619497	1
Solyc01g008540	SL3.0ch01	2578563	2580563	-	9915	6779	9796	7349	59.393	57.136	-2.2564	2.62654e-05	8.08193	4.5196	7.0417e-13	5.59706e-10
Solyc01g008570	SL3.0ch01	2605315	2607315	-	9152	7083	10177	8447	56.372	54.645	-1.72749	0.000913722	-5.12548e-15	-3.91086	1	1
Solyc01g008680	SL3.0ch01	2674333	2676333	-	2236	5785	1168	4602	27.877	20.243	-7.63419	4.33706e-24	-1.30749	0.735163	0.0608893	0.425037
Solyc01g008740	SL3.0ch01	2707811	2709811	+	4600	3866	4858	4530	54.335	51.747	-2.58808	0.000434524	-5.12548e-15	-3.91086	1	1
Solyc01g008800	SL3.0ch01	2774775	2776775	-	7903	7991	6907	7746	49.723	47.137	-2.58606	6.91299e-06	-1.47018	-1.01086	0.247706	0.886274
Solyc01g008810	SL3.0ch01	2774775	2776775	-	7903	7991	6907	7746	49.723	47.137	-2.58606	6.91299e-06	0.025907	1.43634	0.978203	1
Solyc01g008820	SL3.0ch01	2776260	2778260	+	5313	7695	4995	8727	40.844	36.401	-4.4427	2.66692e-13	0.753526	5.7268	0.00787147	0.10788
Solyc01g008850	SL3.0ch01	2810081	2812081	+	9722	11118	8410	10021	46.651	45.63	-1.02103	0.0235056	1.20338	8.03442	6.06176e-05	0.00271746
Solyc01g008870	SL3.0ch01	2830002	2832002	-	12319	9985	13646	11534	55.232	54.194	-1.03844	0.013545	5.91008	-2.56055	0.0828374	0.50683
Solyc01g008880	SL3.0ch01	2835494	2837494	-	3028	10493	3146	11868	22.395	20.954	-1.44102	0.00225983	-4.10482	-3.50504	0.157984	0.714927
Solyc01g008890	SL3.0ch01	2852040	2854040	-	11410	9379	13254	11259	54.885	54.069	-0.815525	0.0419804	-0.800536	3.79302	0.0133101	0.157693
Solyc01g008900	SL3.0ch01	2853138	2855138	+	13409	8791	15146	10673	60.401	58.662	-1.73868	9.71572e-05	-0.268523	2.41205	0.526881	1
Solyc01g008930	SL3.0ch01	2890200	2892200	-	1177	1788	1166	2658	39.696	30.492	-9.20483	1.10782e-14	0.0319589	3.20711	0.942851	1
Solyc01g008940	SL3.0ch01	2890927	2892927	+	958	3608	1087	4940	20.981	18.036	-2.94566	0.000136076	-5.12548e-15	-2.67371	1	1
Solyc01g009000	SL3.0ch01	2944501	2946501	+	166	1605	74	2074	9.373	3.445	-5.92817	4.3788e-14	-0.357232	5.36564	0.214196	0.82738
Solyc01g009010	SL3.0ch01	2946699	2948699	+	173	3178	134	3113	5.163	4.127	-1.03575	0.0251429	0.193651	5.99752	0.570899	1
Solyc01g009015	SL3.0ch01	2950782	2952782	-	121	544	120	842	18.195	12.474	-5.72148	0.00125531	-5.12548e-15	-3.91086	1	1
Solyc01g009070	SL3.0ch01	3014833	3016833	-	2483	7217	2172	7268	25.598	23.008	-2.58946	3.06222e-05	-0.369894	4.08488	0.287366	0.951803
Solyc01g009090	SL3.0ch01	3042442	3044442	-	5344	7299	6319	9903	42.268	38.953	-3.31518	2.14298e-08	-0.152522	6.29009	0.594411	1
Solyc01g009200	SL3.0ch01	3175775	3177775	-	2451	4513	1167	3156	35.195	26.995	-8.20015	4.07852e-19	-0.0986147	-2.97724	1	1
Solyc01g009240	SL3.0ch01	3200574	3202574	+	6132	8736	7062	10605	41.243	39.973	-1.27011	0.0117152	1.81619	-3.69544	1	1
Solyc01g009245	SL3.0ch01	3211020	3213020	-	4278	9682	4639	13175	30.645	26.041	-4.60338	7.57626e-19	4.21871	1.75047	0.0595108	0.420087
Solyc01g009260	SL3.0ch01	3220496	3222496	+	3411	5738	4576	8294	37.283	35.556	-1.72721	0.00555729	-2.76821	-3.23619	0.267344	0.920342
Solyc01g009280	SL3.0ch01	3253968	3255968	-	863	8929	556	8874	8.813	5.896	-2.91724	3.08835e-14	-0.279605	5.55819	0.38656	1
Solyc01g009303	SL3.0ch01	3349097	3351097	-	1216	1559	937	1328	43.82	41.369	-2.45117	0.0409125	-5.12548e-15	-3.91086	1	1
Solyc01g009350	SL3.0ch01	3476831	3478831	-	3443	7130	3237	7469	32.564	30.235	-2.3287	0.000218989	-5.12548e-15	-3.91086	1	1
Solyc01g009360	SL3.0ch01	3482210	3484210	-	4478	9421	3864	8810	32.218	30.488	-1.73053	0.00170719	-5.12548e-15	-3.91086	1	1
Solyc01g009380	SL3.0ch01	3504027	3506027	+	15204	7042	17818	8555	68.345	67.562	-0.78335	0.0337723	0.201625	4.62822	0.473689	1
Solyc01g009440	SL3.0ch01	3597248	3599248	-	1910	7971	1893	8707	19.33	17.858	-1.47154	0.00446833	3.41827	-3.68426	0.402437	1
Solyc01g009450	SL3.0ch01	3615767	3617767	-	7016	8812	7858	10508	44.327	42.786	-1.54093	0.00287068	-0.161464	7.02751	0.546773	1
Solyc01g009490	SL3.0ch01	3659537	3661537	-	4441	9411	4118	9528	32.06	30.177	-1.88301	0.000595324	-5.12548e-15	-3.91086	1	1
Solyc01g009530	SL3.0ch01	3716382	3718382	+	772	2919	844	3555	20.916	19.186	-1.72956	0.0285062	-4.69205	-3.59162	0.200672	0.803497
Solyc01g009560	SL3.0ch01	3748390	3750390	-	2611	6309	2173	5681	29.271	27.667	-1.60387	0.0130258	-5.12548e-15	-3.91086	1	1
Solyc01g009565	SL3.0ch01	3753514	3755514	+	2931	4782	2586	4878	38.001	34.646	-3.35448	1.83427e-05	-3.75838	-3.46136	0.197523	0.798397
Solyc01g009580	SL3.0ch01	3760291	3762291	+	3373	8439	3467	9603	28.556	26.526	-2.02931	0.000291032	-5.12548e-15	-3.58185	1	1
Solyc01g009590	SL3.0ch01	3766335	3768335	-	8130	9358	8140	10534	46.489	43.59	-2.899	4.84434e-08	-5.12548e-15	-3.91086	1	1
Solyc01g009600	SL3.0ch01	3771753	3773753	-	5391	5108	5487	5439	51.348	50.22	-1.12809	0.0498863	-5.12548e-15	-3.91086	1	1
Solyc01g009610	SL3.0ch01	3780779	3782779	-	5338	10053	4228	9562	34.683	30.66	-4.02271	7.66756e-13	0.708894	4.24826	0.0402097	0.329046
Solyc01g009630	SL3.0ch01	3797042	3799042	+	2278	5698	2042	5507	28.561	27.05	-1.51074	0.019853	-0.303898	4.96516	0.256223	0.901892
Solyc01g009660	SL3.0ch01	3833739	3835739	-	2580	8395	2583	9228	23.508	21.869	-1.63853	0.00220402	-5.12548e-15	-1.41509	1	1
Solyc01g009670	SL3.0ch01	3847938	3849938	-	2109	8628	2106	9419	19.642	18.273	-1.36904	0.00578168	-0.625197	0.217826	0.486456	1
Solyc01g009720	SL3.0ch01	3935091	3937091	-	2079	7296	2012	7510	22.176	21.13	-1.04599	0.0420741	-5.12548e-15	-3.91086	1	1
Solyc01g009780	SL3.0ch01	4137249	4139249	+	5958	9035	6793	10716	39.739	38.797	-0.941355	0.042012	1.79127	6.75372	1.89073e-06	0.00017385
Solyc01g009820	SL3.0ch01	4200804	4202804	-	6598	11257	6747	12699	36.953	34.696	-2.25715	6.17571e-06	0.314301	5.20775	0.370066	1
Solyc01g009860	SL3.0ch01	4318203	4320203	-	5195	10565	5649	13441	32.963	29.591	-3.37179	3.35949e-11	-0.711719	5.19781	0.083667	0.509553
Solyc01g009930	SL3.0ch01	4459316	4461316	-	4485	5830	3323	4635	43.48	41.757	-1.72365	0.0117382	4.56133	-1.95204	0.0990396	0.558481
Solyc01g009935	SL3.0ch01	4462692	4464692	+	480	2914	301	2279	14.143	11.667	-2.47594	0.00345044	-5.12548e-15	-3.91086	1	1
Solyc01g009970	SL3.0ch01	4513148	4515148	-	3887	7689	2905	6394	33.578	31.24	-2.33817	0.000278091	0.21533	4.689	0.486194	1
Solyc01g009990	SL3.0ch01	4528468	4530468	+	9527	6584	10548	8059	59.134	56.688	-2.44517	4.79332e-06	-0.10178	7.13088	0.740327	1
Solyc01g010050	SL3.0ch01	4617914	4619914	+	520	3914	603	5498	11.728	9.884	-1.84393	0.0018346	-0.0919099	5.1104	0.768786	1
Solyc01g010080	SL3.0ch01	4734564	4736564	+	1828	5468	1758	6035	25.055	22.559	-2.49612	0.000262847	0.767828	-2.88745	0.717265	1
Solyc01g010130	SL3.0ch01	4802976	4804976	+	6083	11192	5795	11503	35.213	33.501	-1.71175	0.000635795	-5.12548e-15	-3.91086	1	1
Solyc01g010180	SL3.0ch01	4909658	4911658	+	7982	7232	9229	9095	52.465	50.366	-2.09919	0.000117541	0.938922	4.75462	0.388595	1
Solyc01g010210	SL3.0ch01	4926330	4928330	+	2019	18071	2418	23714	10.05	9.253	-0.796753	0.00277237	-5.12548e-15	-3.91086	1	1
Solyc01g010250	SL3.0ch01	4972308	4974308	-	1296	7820	1226	8860	14.217	12.155	-2.0613	2.47111e-05	0.748503	5.45344	0.0305913	0.27645
Solyc01g010260	SL3.0ch01	4996180	4998180	+	4346	9947	4802	11507	30.406	29.444	-0.962627	0.0348652	-5.12548e-15	-3.91086	1	1
Solyc01g010270	SL3.0ch01	5003409	5005409	-	4499	10609	4891	13077	29.779	27.221	-2.55831	3.89675e-07	0.387779	6.90059	0.309906	0.983997
Solyc01g010360	SL3.0ch01	5114498	5116498	-	1376	2666	948	2480	34.043	27.655	-6.38794	4.85574e-09	-1.10033	-0.330225	0.495522	1
Solyc01g010390	SL3.0ch01	5197219	5199219	+	4275	6339	4405	7346	40.277	37.486	-2.79082	1.94322e-05	-1.24258	2.58213	0.0134593	0.15891
Solyc01g010393	SL3.0ch01	5204802	5206802	+	843	1733	749	1824	32.725	29.11	-3.61517	0.00332544	-5.12548e-15	-3.91086	1	1
Solyc01g010465	SL3.0ch01	5305229	5307229	+	1944	3221	1349	2418	37.638	35.811	-1.82696	0.0402324	-0.915291	-2.81287	0.780168	1
Solyc01g010520	SL3.0ch01	5479930	5481930	+	8823	10825	9013	12049	44.905	42.793	-2.11263	1.82915e-05	0.0386793	2.07913	0.954722	1
Solyc01g010525	SL3.0ch01	5482425	5484425	+	415	2935	237	1942	12.388	10.877	-1.51151	0.0477288	-5.12548e-15	-3.38419	1	1
Solyc01g010540	SL3.0ch01	5495776	5497776	+	3404	4421	2733	4346	43.502	38.607	-4.89445	2.65548e-09	0.120401	6.43986	0.682026	1
Solyc01g010640	SL3.0ch01	5587678	5589678	+	1646	9065	1119	9182	15.367	10.863	-4.50436	2.47383e-21	-0.114814	4.51371	0.748408	1
Solyc01g010650	SL3.0ch01	5604422	5606422	-	7790	10630	8910	12641	42.291	41.344	-0.947199	0.0293295	-0.150154	5.48461	0.595105	1
Solyc01g010710	SL3.0ch01	5684412	5686412	-	9703	7574	11298	9266	56.161	54.941	-1.2207	0.0102552	-4.10954	-0.629913	0.0807609	0.500667
Solyc01g010720	SL3.0ch01	5702925	5704925	-	4971	7617	4332	7029	39.49	38.13	-1.35954	0.0175819	-5.12548e-15	0.45585	1	1
Solyc01g010740	SL3.0ch01	5725249	5727249	-	1579	4179	1197	3709	27.423	24.399	-3.02402	0.000319437	-5.12548e-15	-3.91086	1	1
Solyc01g010797	SL3.0ch01	5792494	5794494	+	177	1413	139	1606	11.132	7.966	-3.16646	0.00145446	-5.12548e-15	-3.91086	1	1
Solyc01g010860	SL3.0ch01	6241926	6243926	+	9679	8225	11044	9935	54.061	52.643	-1.41743	0.00351998	-0.608936	4.6961	0.0550604	0.400694
Solyc01g010890	SL3.0ch01	6282902	6284902	+	5030	8770	5715	10449	36.449	35.356	-1.09293	0.0267133	-5.12548e-15	-3.91086	1	1
Solyc01g010900	SL3.0ch01	6301352	6303352	-	7588	8860	6963	9747	46.133	41.67	-4.46361	1.09745e-15	-5.12548e-15	-3.91086	1	1
Solyc01g010940	SL3.0ch01	6435378	6437378	+	9502	8227	11129	10101	53.596	52.421	-1.1747	0.0122903	0.299536	5.43924	0.317561	0.994999
Solyc01g010970	SL3.0ch01	6565739	6567739	+	5141	8414	4979	9206	37.927	35.1	-2.82651	1.32011e-06	-1.28155	-0.189427	0.147062	0.690484
Solyc01g010980	SL3.0ch01	6606352	6608352	+	3463	5091	3064	4829	40.484	38.819	-1.66478	0.0168373	-5.12548e-15	-3.91086	1	1
Solyc01g011050	SL3.0ch01	6968179	6970179	+	4832	9048	5008	10698	34.813	31.886	-2.92678	1.40886e-07	-5.12548e-15	-3.91086	1	1
Solyc01g011080	SL3.0ch01	7532128	7534128	-	757	7187	705	7707	9.529	8.381	-1.14832	0.00662336	-1.0065	2.13616	0.0225341	0.227683
Solyc01g011190	SL3.0ch01	8019475	8021475	-	2603	6595	2922	7847	28.3	27.133	-1.16619	0.0350239	3.13992	-3.03977	0.351727	1
Solyc01g011200	SL3.0ch01	8080720	8082720	-	93	664	20	385	12.285	4.938	-7.34707	3.99549e-05	0.532089	-0.069901	0.477712	1
Solyc01g011500	SL3.0ch01	9390013	9392013	-	667	1882	704	2451	26.167	22.314	-3.85334	0.000583652	-5.12548e-15	-3.91086	1	1
Solyc01g012750	SL3.0ch01	10010522	10012522	+	3018	5708	2911	6409	34.586	31.234	-3.35239	2.01024e-06	-0.227526	-3.63748	1	1
Solyc01g013770	SL3.0ch01	10088680	10090680	-	3327	3981	3403	4300	45.525	44.178	-1.34786	0.048286	-5.12548e-15	-3.91086	1	1
Solyc01g013780	SL3.0ch01	10089410	10091410	-	3247	3746	3360	4183	46.432	44.545	-1.88754	0.0134051	-5.12548e-15	-3.91086	1	1
Solyc01g013830	SL3.0ch01	10147802	10149802	-	124	198	280	631	38.509	30.735	-7.77386	0.00776651	-5.12548e-15	-3.91086	1	1
Solyc01g013870	SL3.0ch01	10223696	10225696	-	2464	3571	2651	4520	40.829	36.968	-3.86016	6.7851e-06	-5.12548e-15	-3.91086	1	1
Solyc01g013880	SL3.0ch01	10224574	10226574	-	3398	5105	3718	6461	39.962	36.526	-3.43618	1.81903e-06	-5.12548e-15	-3.69072	1	1
Solyc01g013990	SL3.0ch01	10717357	10719357	+	2164	10366	1850	9413	17.271	16.425	-0.845087	0.0418802	-5.12548e-15	-3.91086	1	1
Solyc01g014060	SL3.0ch01	11083011	11085011	-	365	4524	216	4152	7.466	4.945	-2.52068	7.59496e-07	-5.12548e-15	-3.91086	1	1
Solyc01g014103	SL3.0ch01	11583368	11585368	-	4102	7079	3564	8019	36.687	30.769	-5.91801	2.11359e-20	-1.8095	2.52422	0.0218686	0.222975
Solyc01g014130	SL3.0ch01	11609250	11611250	+	4012	5961	4024	6499	40.229	38.24	-1.98857	0.00248062	-5.12548e-15	-3.86883	1	1
Solyc01g014300	SL3.0ch01	11950544	11952544	-	4908	4823	5522	5750	50.437	48.989	-1.4481	0.0201373	-5.12548e-15	-3.91086	1	1
Solyc01g014370	SL3.0ch01	12495362	12497362	-	1421	2866	779	1895	33.147	29.132	-4.01434	0.000371892	-5.12548e-15	-3.91086	1	1
Solyc01g014375	SL3.0ch01	12645746	12647746	-	4544	8609	5538	11301	34.547	32.888	-1.65931	0.00184077	-1.49543	0.367227	0.108706	0.587695
Solyc01g014397	SL3.0ch01	13017904	13019904	-	1021	1752	602	1237	36.819	32.735	-4.08415	0.00305308	-5.12548e-15	-3.91086	1	1
Solyc01g014440	SL3.0ch01	13514435	13516435	+	624	1212	260	638	33.987	28.953	-5.0337	0.00561747	-5.12548e-15	-3.91086	1	1
Solyc01g014647	SL3.0ch01	14412647	14414647	+	3071	3754	4319	5674	44.996	43.22	-1.77608	0.0130637	-5.12548e-15	-3.91086	1	1
Solyc01g014705	SL3.0ch01	14488262	14490262	+	272	1032	169	872	20.859	16.234	-4.62451	0.00316813	-5.12548e-15	-3.91086	1	1
Solyc01g014960	SL3.0ch01	16130252	16132252	+	1618	7019	1475	6930	18.733	17.549	-1.18428	0.0250843	-5.12548e-15	-3.91086	1	1
Solyc01g015030	SL3.0ch01	16601492	16603492	-	1738	8782	2031	11301	16.521	15.234	-1.28689	0.00444128	-5.12548e-15	-3.91086	1	1
Solyc01g015085	SL3.0ch01	16741535	16743535	+	7990	7723	8787	10263	50.85	46.126	-4.72363	8.53937e-18	-5.12548e-15	-3.91086	1	1
Solyc01g016380	SL3.0ch01	19403384	19405384	-	1568	6352	1738	7904	19.798	18.025	-1.77267	0.00194724	-5.12548e-15	-3.91086	1	1
Solyc01g016550	SL3.0ch01	20424155	20426155	-	2803	7286	1319	6338	27.783	17.226	-10.5567	9.53445e-61	3.30072	-3.74789	0.50522	1
Solyc01g016620	SL3.0ch01	20708831	20710831	+	3195	10743	3585	12744	22.923	21.955	-0.96814	0.0241634	-5.12548e-15	-3.91086	1	1
Solyc01g016720	SL3.0ch01	21668327	21670327	-	1384	3983	987	3660	25.787	21.24	-4.54771	1.40461e-07	4.06411	-3.11431	0.136387	0.662451
Solyc01g016730	SL3.0ch01	21840544	21842544	-	2018	7206	1750	7821	21.878	18.284	-3.59331	1.53057e-09	-5.12548e-15	-3.91086	1	1
Solyc01g016850	SL3.0ch01	22483220	22485220	-	671	2965	392	2029	18.454	16.192	-2.26269	0.0142402	-5.12548e-15	-3.91086	1	1
Solyc01g016890	SL3.0ch01	22665080	22667080	+	715	2989	199	1516	19.303	11.603	-7.69996	1.5972e-12	-5.12548e-15	-3.91086	1	1
Solyc01g017060	SL3.0ch01	23788565	23790565	-	1116	7368	1489	10585	13.154	12.332	-0.821888	0.0425769	-5.12548e-15	-3.91086	1	1
Solyc01g017070	SL3.0ch01	23789286	23791286	-	1646	11521	2156	17346	12.501	11.055	-1.44567	6.42448e-05	-5.12548e-15	-3.91086	1	1
Solyc01g017080	SL3.0ch01	23791343	23793343	-	2740	20096	3042	28943	11.999	9.511	-2.48789	7.69627e-20	-5.12548e-15	-3.91086	1	1
Solyc01g017083	SL3.0ch01	23789404	23791404	+	1610	11080	2106	16762	12.687	11.162	-1.5254	3.98865e-05	-5.12548e-15	-3.91086	1	1
Solyc01g017087	SL3.0ch01	23792739	23794739	-	3146	18920	3133	20073	14.257	13.501	-0.75641	0.0116425	-1.18484	-3.11501	1	1
Solyc01g017090	SL3.0ch01	23792951	23794951	+	3443	20952	3432	21978	14.114	13.506	-0.607054	0.026467	-5.12548e-15	-3.26315	1	1
Solyc01g017140	SL3.0ch01	23797946	23799946	+	3193	26217	3431	34757	10.857	8.984	-1.87235	2.37074e-15	-5.12548e-15	-3.6634	1	1
Solyc01g017160	SL3.0ch01	23803934	23805934	-	2698	18445	3109	23463	12.761	11.7	-1.06044	0.00035807	-5.12548e-15	-3.91086	1	1
Solyc01g017185	SL3.0ch01	23807137	23809137	-	1926	18491	1998	20830	9.433	8.752	-0.680906	0.00861281	-5.12548e-15	-3.91086	1	1
Solyc01g017240	SL3.0ch01	23814578	23816578	-	1539	4012	1957	5859	27.725	25.038	-2.68635	0.000403758	-5.12548e-15	-3.91086	1	1
Solyc01g017245	SL3.0ch01	23814842	23816842	-	1520	4018	1736	5495	27.447	24.008	-3.43899	1.11416e-05	-5.12548e-15	-3.91086	1	1
Solyc01g017320	SL3.0ch01	23853532	23855532	+	1795	8135	1749	9142	18.077	16.059	-2.0174	0.000100725	-5.12548e-15	-3.87171	1	1
Solyc01g017333	SL3.0ch01	23854293	23856293	+	1759	11964	2087	15990	12.818	11.545	-1.27284	0.000458055	-1.76641	-3.83347	1	1
Solyc01g017380	SL3.0ch01	23859648	23861648	+	2283	21230	2367	27199	9.71	8.006	-1.7037	1.59919e-11	0.815791	-3.79469	1	1
Solyc01g017390	SL3.0ch01	23860018	23862018	+	2151	15501	2236	19499	12.186	10.288	-1.89803	5.36169e-09	-5.12548e-15	-3.86962	1	1
Solyc01g017410	SL3.0ch01	23865798	23867798	-	2777	33974	2936	38188	7.556	7.139	-0.416874	0.0150993	-5.12548e-15	-3.91086	1	1
Solyc01g017440	SL3.0ch01	23870256	23872256	-	2115	12928	2130	14977	14.06	12.451	-1.60865	2.19769e-05	-1.24051	-2.85883	0.649181	1
Solyc01g017470	SL3.0ch01	23869350	23871350	+	3325	21065	3137	24241	13.633	11.458	-2.17453	2.53732e-13	-1.73871	-3.61296	1	1
Solyc01g017480	SL3.0ch01	23872592	23874592	-	1525	5932	1483	7131	20.451	17.216	-3.23442	2.30461e-07	-5.12548e-15	-3.91086	1	1
Solyc01g017500	SL3.0ch01	23875211	23877211	+	1813	1827	2637	2933	49.808	47.343	-2.46478	0.0122951	-2.67204	-3.79401	0.580147	1
Solyc01g017510	SL3.0ch01	23878625	23880625	+	1854	3637	2113	5801	33.764	26.7	-7.06482	7.71638e-18	1.8091	-3.87049	1	1
Solyc01g017630	SL3.0ch01	24486176	24488176	+	1259	3534	971	3509	26.267	21.674	-4.59337	3.39274e-07	-5.12548e-15	-3.91086	1	1
Solyc01g017660	SL3.0ch01	24631255	24633255	+	950	2173	390	1263	30.419	23.593	-6.826	6.86113e-07	-5.12548e-15	-3.91086	1	1
Solyc01g017680	SL3.0ch01	24701309	24703309	-	1410	3150	1010	2551	30.921	28.363	-2.55823	0.00767189	-5.12548e-15	-3.91086	1	1
Solyc01g017690	SL3.0ch01	24774561	24776561	+	1915	4315	1194	3183	30.738	27.279	-3.4594	0.000101657	-5.12548e-15	-3.91086	1	1
Solyc01g017710	SL3.0ch01	24811699	24813699	+	2375	6740	2400	7874	26.056	23.36	-2.69601	1.45774e-05	-1.37555	-2.4243	0.561048	1
Solyc01g017760	SL3.0ch01	25265339	25267339	+	2444	4155	2454	4569	37.036	34.942	-2.09358	0.00686548	-5.12548e-15	-3.87428	1	1
Solyc01g018025	SL3.0ch01	26774919	26776919	-	1596	1870	2117	2802	46.047	43.037	-3.01011	0.00415929	-5.12548e-15	-3.91086	1	1
Solyc01g020240	SL3.0ch01	27877980	27879980	+	8709	9038	8273	9392	49.073	46.833	-2.24036	2.50235e-05	-0.0140697	5.00533	0.96048	1
Solyc01g020340	SL3.0ch01	29246106	29248106	+	3216	7748	2855	8575	29.332	24.978	-4.35423	6.80062e-13	2.06098	-0.973455	0.0162983	0.181645
Solyc01g020360	SL3.0ch01	29342396	29344396	-	2162	6037	1283	4749	26.369	21.27	-5.09918	5.15301e-12	-5.12548e-15	-3.91086	1	1
Solyc01g020401	SL3.0ch01	30289831	30291831	+	3887	9157	4044	10404	29.799	27.99	-1.80911	0.000745734	-5.12548e-15	-3.91086	1	1
Solyc01g020470	SL3.0ch01	30834139	30836139	+	2074	2214	2466	2824	48.368	46.616	-1.75128	0.0457184	-5.12548e-15	-3.91086	1	1
Solyc01g034060	SL3.0ch01	35749250	35751250	-	2482	8770	2710	10464	22.058	20.571	-1.48748	0.00313949	-0.978397	-3.78634	1	1
Solyc01g034150	SL3.0ch01	36285927	36287927	-	232	1801	178	1954	11.412	8.349	-3.06274	0.000770104	-0.624774	3.26695	0.120764	0.620707
Solyc01g028930	SL3.0ch01	39819332	39821332	-	1366	6307	1834	9356	17.803	16.39	-1.41305	0.00702776	0.334323	5.16803	0.234464	0.862505
Solyc01g028935	SL3.0ch01	39811652	39813652	+	100	1372	30	601	6.793	4.754	-2.03912	0.0387686	6.00778	-2.19065	0.0136441	0.160442
Solyc01g028860	SL3.0ch01	40989054	40991054	+	4709	11271	5233	13690	29.468	27.654	-1.81391	0.000158643	-0.422796	9.02023	0.140493	0.672799
Solyc01g044340	SL3.0ch01	43153083	43155083	+	7733	9037	8292	10378	46.112	44.413	-1.69861	0.00098505	-1.7537	-3.75964	1	1
Solyc01g044307	SL3.0ch01	43153227	43155227	+	7724	8745	8254	10608	46.9	43.76	-3.1403	5.83159e-09	-0.126582	2.21798	0.831179	1
Solyc01g044371	SL3.0ch01	43237592	43239592	-	1030	1230	1441	1906	45.575	43.053	-2.52174	0.0323741	0.962286	0.509607	0.115038	0.605654
Solyc01g044420	SL3.0ch01	43828162	43830162	+	3459	3634	4013	4620	48.766	46.484	-2.28197	0.00299782	2.61093	-1.85885	0.541489	1
Solyc01g049820	SL3.0ch01	46571924	46573924	-	961	642	69	77	59.95	47.26	-12.6898	0.00245685	-0.134427	-2.0279	1	1
Solyc01g049840	SL3.0ch01	46574317	46576317	-	3345	5958	2409	4958	35.956	32.7	-3.25627	1.24111e-05	-4.68251	-2.13752	0.111469	0.596189
Solyc01g056220	SL3.0ch01	52555722	52557722	-	3235	7770	3937	10051	29.396	28.146	-1.25018	0.0174073	-5.12548e-15	-3.91086	1	1
Solyc01g056240	SL3.0ch01	52610547	52612547	+	2185	8075	1933	8962	21.296	17.742	-3.55421	1.53873e-10	-5.12548e-15	-3.91086	1	1
Solyc01g056320	SL3.0ch01	53341107	53343107	+	4130	6332	4538	7370	39.476	38.109	-1.36737	0.0200986	-0.0997618	-1.12148	0.949763	1
Solyc01g056520	SL3.0ch01	54572457	54574457	-	5286	9809	6785	13866	35.018	32.856	-2.16267	2.07539e-05	0.326469	5.27248	0.213455	0.826462
Solyc01g056670	SL3.0ch01	55569743	55571743	+	991	1224	971	1438	44.74	40.307	-4.43322	0.00167008	3.13226	-3.72002	0.469116	1
Solyc01g056790	SL3.0ch01	56536714	56538714	+	2222	2312	2256	2695	49.007	45.567	-3.44095	0.000647053	1.17569	0.438207	0.42143	1
Solyc01g056850	SL3.0ch01	56987295	56989295	-	2481	14812	2438	16463	14.347	12.899	-1.44806	5.66252e-05	2.75663	4.8358	0.000600143	0.0162007
Solyc01g056910	SL3.0ch01	57395771	57397771	+	2080	2928	1712	2673	41.534	39.042	-2.49136	0.00868607	-5.12548e-15	-3.55801	1	1
Solyc01g056960	SL3.0ch01	57808965	57810965	+	1923	4255	2065	4903	31.127	29.635	-1.4911	0.0337187	-5.12548e-15	-3.91086	1	1
Solyc01g057080	SL3.0ch01	58284435	58286435	-	3903	8345	3554	9472	31.866	27.284	-4.58253	5.31815e-15	4.24237	-2.43168	0.149593	0.69693
Solyc01g057150	SL3.0ch01	59347713	59349713	-	680	5441	582	5663	11.109	9.319	-1.78984	0.00080461	-5.12548e-15	-3.47195	1	1
Solyc01g057175	SL3.0ch01	59422250	59424250	+	104	2290	45	2224	4.344	1.983	-2.36094	4.35235e-06	-5.12548e-15	-3.87342	1	1
Solyc01g057200	SL3.0ch01	59695973	59697973	-	4784	10397	4930	11486	31.513	30.032	-1.4814	0.00297363	0.00754933	3.21284	0.985835	1
Solyc01g057260	SL3.0ch01	60236776	60238776	+	3133	6299	3143	6727	33.217	31.844	-1.37274	0.0229669	-0.73214	-0.431702	0.505471	1
Solyc01g057340	SL3.0ch01	60508172	60510172	-	2054	2804	1514	2323	42.281	39.458	-2.82286	0.00499773	0.243763	3.33378	0.492419	1
Solyc01g057460	SL3.0ch01	60979001	60981001	+	6204	8306	6692	9405	42.757	41.573	-1.18376	0.0202627	0.815597	4.86431	0.015961	0.17902
Solyc01g057480	SL3.0ch01	61024567	61026567	+	233	931	143	928	20.017	13.352	-6.66517	2.66185e-05	0.124144	-3.37859	1	1
Solyc01g057490	SL3.0ch01	61051966	61053966	+	642	913	721	1523	41.286	32.13	-9.15605	1.46632e-08	-0.19059	1.36957	0.724929	1
Solyc01g057535	SL3.0ch01	61444089	61446089	+	3648	6565	3850	7896	35.719	32.777	-2.94207	5.20982e-06	-5.12548e-15	-3.91086	1	1
Solyc01g057590	SL3.0ch01	62776747	62778747	+	1769	4340	1294	4095	28.957	24.012	-4.9454	3.89601e-09	-5.12548e-15	-3.91086	1	1
Solyc01g057640	SL3.0ch01	63038158	63040158	+	4017	8645	2741	7959	31.725	25.617	-6.10802	7.21251e-24	-5.12548e-15	-3.91086	1	1
Solyc01g057705	SL3.0ch01	63486555	63488555	-	1674	4054	1582	4274	29.225	27.015	-2.20983	0.0054337	4.80613	-3.36707	0.15315	0.705069
Solyc01g057920	SL3.0ch01	64503173	64505173	-	1071	9151	777	8833	10.477	8.085	-2.39207	1.11782e-08	-5.12548e-15	-3.91086	1	1
Solyc01g057960	SL3.0ch01	64630623	64632623	+	442	4861	228	4426	8.335	4.899	-3.43589	1.39724e-11	-5.12548e-15	-3.76338	1	1
Solyc01g057990	SL3.0ch01	64658825	64660825	+	2035	8394	2141	9416	19.513	18.526	-0.987328	0.0326882	-5.12548e-15	-3.91086	1	1
Solyc01g058030	SL3.0ch01	64960366	64962366	-	5872	8896	6170	10044	39.762	38.054	-1.70811	0.00146549	3.49178	-3.37023	0.267399	0.920354
Solyc01g058040	SL3.0ch01	64965082	64967082	-	1157	8223	743	9094	12.335	7.553	-4.78164	1.04975e-27	-5.12548e-15	-3.91086	1	1
Solyc01g058200	SL3.0ch01	65539397	65541397	-	321	2559	114	1863	11.146	5.766	-5.37952	9.88316e-11	0.0242449	2.02657	0.966177	1
Solyc01g058323	SL3.0ch01	66066309	66068309	+	5233	7201	5057	7459	42.086	40.404	-1.68193	0.00458584	-5.12548e-15	-3.91086	1	1
Solyc01g058360	SL3.0ch01	66327542	66329542	+	12162	14804	7303	9249	45.101	44.122	-0.979682	0.0251744	-5.55567	-3.34951	0.106538	0.581422
Solyc01g058420	SL3.0ch01	66429522	66431522	+	1714	2329	2504	3682	42.394	40.478	-1.91576	0.0294564	-5.12548e-15	-3.91086	1	1
Solyc01g058460	SL3.0ch01	66622794	66624794	+	1705	10646	1813	12446	13.805	12.715	-1.08977	0.00561513	-5.12548e-15	-3.91086	1	1
Solyc01g058470	SL3.0ch01	66698762	66700762	-	500	2578	594	4145	16.244	12.534	-3.71002	5.3011e-06	0.00801328	1.84365	1	1
Solyc01g058700	SL3.0ch01	67656464	67658464	-	2148	6805	1938	7190	23.992	21.231	-2.76058	1.00648e-05	-5.12548e-15	-3.91086	1	1
Solyc01g059780	SL3.0ch01	68349812	68351812	-	519	1515	532	2001	25.516	21.003	-4.51346	0.00028592	-5.12548e-15	-3.91086	1	1
Solyc01g059880	SL3.0ch01	68894527	68896527	-	2704	7108	3476	9831	27.558	26.122	-1.4365	0.00889129	0.500301	5.3531	0.10044	0.56314
Solyc01g059950	SL3.0ch01	69287391	69289391	+	4737	2733	4952	3155	63.414	61.083	-2.33064	0.00191113	1.84764	-0.349499	1	1
Solyc01g060205	SL3.0ch01	69736096	69738096	-	131	470	202	938	21.797	17.719	-4.07771	0.0220294	-1.12707	0.64954	0.0516206	0.385141
Solyc01g060240	SL3.0ch01	69849246	69851246	+	3837	6388	3740	6894	37.526	35.17	-2.35546	0.000335992	0.671619	4.19646	0.170783	0.743496
Solyc01g060270	SL3.0ch01	69913210	69915210	+	174	859	119	765	16.844	13.462	-3.3826	0.02259	-5.12548e-15	-3.76338	1	1
Solyc01g060340	SL3.0ch01	70216873	70218873	-	199	701	99	482	22.111	17.04	-5.07152	0.0116636	-5.12548e-15	-3.91086	1	1
Solyc01g060390	SL3.0ch01	70809201	70811201	-	1114	3050	119	614	26.753	16.235	-10.5185	7.81523e-10	1.80242	-3.76582	1	1
Solyc01g060400	SL3.0ch01	70809838	70811838	-	211	1357	12	249	13.457	4.598	-8.85893	1.44392e-05	-5.12548e-15	-3.91086	1	1
Solyc01g060410	SL3.0ch01	70824935	70826935	+	3564	6348	3502	6960	35.956	33.474	-2.48289	0.000174818	-5.12548e-15	-3.87399	1	1
Solyc01g065490	SL3.0ch01	71546199	71548199	+	4773	5034	4711	7518	48.669	38.523	-10.1461	3.61518e-50	0.232467	2.02815	0.681579	1
Solyc01g065495	SL3.0ch01	71547608	71549608	+	819	2775	895	3380	22.788	20.936	-1.85231	0.0258319	-0.366837	3.83573	0.300453	0.969124
Solyc01g065650	SL3.0ch01	72048984	72050984	-	1834	2895	1407	2505	38.782	35.966	-2.81573	0.00470202	-5.12548e-15	-3.91086	1	1
Solyc01g065670	SL3.0ch01	72048979	72050979	+	1838	2924	1411	2532	38.597	35.785	-2.81229	0.00451813	-5.12548e-15	-3.91086	1	1
Solyc01g065690	SL3.0ch01	72095230	72097230	-	4614	7557	4510	8216	37.91	35.439	-2.47053	5.01143e-05	-0.745823	2.47788	0.208474	0.817265
Solyc01g065980	SL3.0ch01	72602924	72604924	-	5083	5616	4987	5820	47.509	46.146	-1.3631	0.0246886	-0.537305	9.22691	0.143351	0.680049
Solyc01g066040	SL3.0ch01	72763907	72765907	+	5014	8399	4559	9104	37.382	33.367	-4.01416	1.24232e-11	-1.51526	-0.530144	0.156019	0.71141
Solyc01g066050	SL3.0ch01	72803199	72805199	-	5175	7329	5476	8086	41.387	40.378	-1.00923	0.0488358	-0.189762	6.58437	0.483966	1
Solyc01g066070	SL3.0ch01	72856749	72858749	-	8110	6672	7407	6417	54.864	53.581	-1.28329	0.0166944	-5.12548e-15	-3.83362	1	1
Solyc01g066080	SL3.0ch01	72876430	72878430	-	2978	9020	2591	8808	24.821	22.73	-2.09074	0.000153042	4.22971	-3.3648	0.162971	0.725693
Solyc01g066330	SL3.0ch01	73924755	73926755	+	1483	2817	887	1911	34.488	31.701	-2.78716	0.00922484	-5.12548e-15	-3.91086	1	1
Solyc01g066340	SL3.0ch01	73944125	73946125	-	1163	1746	675	1261	39.979	34.866	-5.11367	0.000264125	-0.0180092	2.46789	0.969021	1
Solyc01g066350	SL3.0ch01	73965562	73967562	+	3017	5455	2983	5845	35.611	33.79	-1.82121	0.00738105	-5.12548e-15	-3.91086	1	1
Solyc01g066380	SL3.0ch01	74055611	74057611	+	2365	6922	1930	6939	25.466	21.761	-3.70451	7.44884e-09	-5.12548e-15	-3.91086	1	1
Solyc01g066453	SL3.0ch01	74228544	74230544	+	1823	5584	1558	7324	24.612	17.541	-7.07076	2.07773e-27	1.48977	2.71717	0.0658926	0.446288
Solyc01g066520	SL3.0ch01	74341774	74343774	-	7475	7558	7968	9662	49.724	45.196	-4.52825	1.26343e-15	-0.508739	5.50767	0.0511078	0.382832
Solyc01g066770	SL3.0ch01	74767816	74769816	-	10395	4356	11272	5557	70.47	66.98	-3.49018	5.72568e-11	0.00654593	4.85038	0.988295	1
Solyc01g066790	SL3.0ch01	74790368	74792368	-	4012	9574	4287	11919	29.53	26.453	-3.07723	6.65332e-09	3.13133	-3.72045	0.489738	1
Solyc01g066913	SL3.0ch01	74994780	74996780	+	2360	4746	2288	6040	33.211	27.474	-5.73779	3.49805e-14	-5.12548e-15	-3.91086	1	1
Solyc01g066940	SL3.0ch01	75024149	75026149	+	5369	8288	5711	9297	39.313	38.053	-1.26013	0.0162114	-0.508756	5.00617	0.117201	0.610997
Solyc01g067020	SL3.0ch01	75172116	75174116	-	4993	8687	4003	8439	36.499	32.173	-4.32525	6.05718e-13	2.42294	3.20894	0.0170638	0.187256
Solyc01g067107	SL3.0ch01	75287906	75289906	-	5253	5749	5703	6660	47.746	46.13	-1.61628	0.00817355	-0.883785	-0.14667	0.325305	1
Solyc01g067130	SL3.0ch01	75325670	75327670	-	4290	5005	4957	6082	46.154	44.904	-1.24942	0.0382026	-0.834155	-0.348947	0.574307	1
Solyc01g067300	SL3.0ch01	75539137	75541137	-	6343	7700	5979	7925	45.168	43.002	-2.1664	0.000227104	1.8148	4.95438	0.00425289	0.0700034
Solyc01g067370	SL3.0ch01	75649792	75651792	+	8356	8512	8875	9840	49.538	47.422	-2.11573	6.23102e-05	-5.12548e-15	-3.51785	1	1
Solyc01g067390	SL3.0ch01	75677303	75679303	+	1535	4682	1003	4087	24.69	19.705	-4.98506	5.13465e-10	-0.591491	7.03044	0.0389443	0.322668
Solyc01g067417	SL3.0ch01	75806191	75808191	+	2443	5313	1431	4238	31.498	25.243	-6.25565	7.75772e-15	-5.12548e-15	-3.91086	1	1
Solyc01g067440	SL3.0ch01	75931096	75933096	-	4456	6545	4156	6963	40.505	37.377	-3.12795	2.32467e-06	0.423363	1.75359	0.705169	1
Solyc01g067460	SL3.0ch01	75966844	75968844	+	2016	9139	2204	11911	18.073	15.615	-2.45802	2.99523e-07	1.85673	1.47896	0.116281	0.608659
Solyc01g067480	SL3.0ch01	75987587	75989587	+	2549	7348	2668	8496	25.755	23.898	-1.85704	0.00136795	1.43701	3.55928	0.000399313	0.0117649
Solyc01g067530	SL3.0ch01	76083055	76085055	+	3775	5785	3652	6099	39.487	37.453	-2.03488	0.00252517	-0.410175	5.39089	0.324434	1
Solyc01g067550	SL3.0ch01	76119659	76121659	-	1339	7889	743	7453	14.51	9.065	-5.44479	9.16385e-28	0.16056	5.75344	0.619365	1
Solyc01g067570	SL3.0ch01	76190800	76192800	+	2143	6395	2397	8179	25.1	22.665	-2.43503	8.13767e-05	-1.40866	4.47999	3.17334e-05	0.00163786
Solyc01g067690	SL3.0ch01	76392645	76394645	-	26	197	30	438	11.659	6.41	-5.24894	0.0140203	0.162983	2.24018	0.714787	1
Solyc01g067740	SL3.0ch01	76491969	76493969	+	16018	9558	16190	10540	62.629	60.569	-2.06038	1.60323e-06	0.342182	10.4036	0.244156	0.879537
Solyc01g067830	SL3.0ch01	76617794	76619794	-	2869	4961	3566	6691	36.641	34.767	-1.87462	0.00578352	0.0288863	4.59511	0.931823	1
Solyc01g067860	SL3.0ch01	76648640	76650640	+	3377	6937	2158	5733	32.742	27.348	-5.39429	1.37269e-14	-5.12548e-15	-3.91086	1	1
Solyc01g067880	SL3.0ch01	76673122	76675122	+	2776	3316	2971	4249	45.568	41.15	-4.41837	4.26846e-07	-5.12548e-15	-3.91086	1	1
Solyc01g067945	SL3.0ch01	76832603	76834603	+	1008	1437	1247	2156	41.227	36.644	-4.58286	0.000321636	-5.12548e-15	-3.56598	1	1
Solyc01g068010	SL3.0ch01	76869045	76871045	+	4323	4368	4940	6225	49.741	44.245	-5.4957	4.8761e-14	-5.12548e-15	-3.91086	1	1
Solyc01g068065	SL3.0ch01	76900854	76902854	-	4363	7855	4095	8502	35.71	32.508	-3.20187	1.48939e-07	-0.325729	4.27439	0.290557	0.956878
Solyc01g068070	SL3.0ch01	76908497	76910497	+	5755	8941	4498	8897	39.16	33.58	-5.58062	1.84554e-21	-0.130111	3.96957	0.714055	1
Solyc01g068100	SL3.0ch01	77013470	77015470	-	1826	10045	1502	11210	15.382	11.816	-3.56642	1.27302e-15	0.343678	8.06111	0.282459	0.945796
Solyc01g068110	SL3.0ch01	77045101	77047101	-	520	461	74	1024	53.007	6.74	-46.2676	7.98736e-128	-5.12548e-15	-3.91086	1	1
Solyc01g068140	SL3.0ch01	77057767	77059767	+	5313	8448	5185	9033	38.609	36.468	-2.14126	0.000186977	-0.930983	1.5998	0.056303	0.405935
Solyc01g068263	SL3.0ch01	77194677	77196677	-	31	97	18	471	24.219	3.681	-20.5378	3.06457e-11	-0.293369	1.06976	0.672888	1
Solyc01g068270	SL3.0ch01	77217325	77219325	+	5512	10743	5548	11736	33.91	32.099	-1.81052	0.000344304	-0.398543	5.41957	0.288229	0.953424
Solyc01g068290	SL3.0ch01	77256556	77258556	-	14935	10056	15222	10627	59.762	58.888	-0.873356	0.0246707	0.0843052	4.00811	0.789682	1
Solyc01g068350	SL3.0ch01	77376702	77378702	+	1392	3953	1104	3586	26.043	23.539	-2.50359	0.00257443	-1.37348	0.576582	0.0150016	0.171814
Solyc01g068400	SL3.0ch01	77429671	77431671	+	3753	10028	3219	10014	27.233	24.326	-2.9076	7.36853e-08	-0.0403932	6.28509	0.879923	1
Solyc01g068420	SL3.0ch01	77480875	77482875	+	3242	6961	3368	8631	31.775	28.069	-3.70596	3.37925e-09	-5.12548e-15	-3.91086	1	1
Solyc01g068430	SL3.0ch01	77487725	77489725	+	1950	8596	1655	8461	18.49	16.36	-2.1302	5.11423e-05	-4.63989	-1.84881	0.016028	0.17949
Solyc01g068490	SL3.0ch01	77545921	77547921	+	4247	12771	4328	14645	24.956	22.811	-2.14457	2.31432e-06	0.041134	2.74398	0.951173	1
Solyc01g068563	SL3.0ch01	77580574	77582574	+	672	1138	725	2419	37.127	23.06	-14.0673	9.96423e-25	-5.12548e-15	-3.91086	1	1
Solyc01g079150	SL3.0ch01	78102435	78104435	-	7705	10541	7507	11196	42.228	40.138	-2.09049	4.26057e-05	-1.14362	2.65721	0.104569	0.576781
Solyc01g079170	SL3.0ch01	78121430	78123430	-	1184	6119	1166	7784	16.213	13.028	-3.18458	1.72038e-08	0.741947	2.21383	0.359843	1
Solyc01g079180	SL3.0ch01	78135368	78137368	+	2631	6596	2101	6163	28.514	25.424	-3.09062	5.05678e-06	-5.12548e-15	-3.91086	1	1
Solyc01g079200	SL3.0ch01	78146506	78148506	-	4405	7311	3537	6471	37.598	35.342	-2.25643	0.000463966	8.04569	1.57614	9.64674e-06	0.000640902
Solyc01g079210	SL3.0ch01	78155614	78157614	+	5103	6048	5825	7751	45.763	42.907	-2.85611	7.66357e-06	-0.116209	4.27189	0.706231	1
Solyc01g079235	SL3.0ch01	78180880	78182880	+	825	7887	506	6412	9.47	7.314	-2.15544	1.96319e-06	-0.320823	6.11158	0.233339	0.861011
Solyc01g079270	SL3.0ch01	78220427	78222427	-	5065	6539	4872	7234	43.649	40.245	-3.40423	1.58586e-07	-5.12548e-15	-3.91086	1	1
Solyc01g079300	SL3.0ch01	78241850	78243850	-	7605	8252	8955	10298	47.96	46.512	-1.44766	0.00448277	-4.91096	-2.97618	0.22563	0.848027
Solyc01g079340	SL3.0ch01	78291873	78293873	+	9026	6992	10716	9026	56.349	54.28	-2.06889	8.53503e-05	-0.306221	5.02297	0.282256	0.94542
Solyc01g079350	SL3.0ch01	78301469	78303469	+	4369	7000	4364	7480	38.429	36.846	-1.5834	0.00793939	-0.483645	5.86604	0.191557	0.785735
Solyc01g079375	SL3.0ch01	78323687	78325687	-	4047	5761	4514	7568	41.262	37.361	-3.90087	7.19731e-09	-5.12548e-15	-3.66024	1	1
Solyc01g079390	SL3.0ch01	78331324	78333324	+	34	467	2	167	6.786	1.183	-5.603	0.00196009	0.0177561	5.58338	0.956678	1
Solyc01g079420	SL3.0ch01	78354031	78356031	+	6357	7707	7043	8891	45.201	44.201	-0.999432	0.0418621	0.508974	6.93877	0.136372	0.662451
Solyc01g079460	SL3.0ch01	78375458	78377458	-	4414	5733	4018	5722	43.501	41.253	-2.24798	0.0010035	-0.565979	-3.1107	1	1
Solyc01g079470	SL3.0ch01	78375113	78377113	+	4414	5662	4019	5811	43.807	40.885	-2.92202	3.09142e-05	4.41695	3.28484	1.08876e-07	1.72312e-05
Solyc01g079580	SL3.0ch01	78533392	78535392	+	2523	8643	2777	10673	22.595	20.647	-1.94854	0.000187765	3.60223	4.39668	2.77465e-07	3.67569e-05
Solyc01g079650	SL3.0ch01	78631307	78633307	+	1555	9463	1588	10792	14.113	12.827	-1.28613	0.00281473	-0.545147	4.3406	0.103264	0.571848
Solyc01g079660	SL3.0ch01	78645386	78647386	-	784	5353	511	3996	12.775	11.338	-1.43705	0.0149517	-5.12548e-15	-3.91086	1	1
Solyc01g079670	SL3.0ch01	78651137	78653137	-	2011	6860	1966	7371	22.669	21.056	-1.61336	0.00551426	4.52665	2.76999	6.89283e-06	0.000475951
Solyc01g079700	SL3.0ch01	78674648	78676648	-	2865	5645	2193	4708	33.666	31.778	-1.88827	0.00821428	0.468827	-1.10804	0.73649	1
Solyc01g079710	SL3.0ch01	78684284	78686284	-	5972	4732	6813	5951	55.792	53.377	-2.41554	0.00018343	-0.617961	5.39416	0.0286185	0.265739
Solyc01g079740	SL3.0ch01	78732540	78734540	+	4402	7469	5014	9079	37.082	35.578	-1.50402	0.00753356	5.2061	-0.425764	0.0121321	0.148001
Solyc01g079820	SL3.0ch01	78811211	78813211	-	6843	7963	7696	9992	46.218	43.51	-2.70803	1.28648e-06	0.493769	6.19393	0.0904169	0.530343
Solyc01g079900	SL3.0ch01	78930988	78932988	-	2088	5311	2170	6158	28.22	26.057	-2.16335	0.00166612	-5.12548e-15	-3.83217	1	1
Solyc01g079940	SL3.0ch01	78952701	78954701	-	6133	5593	7127	7596	52.303	48.407	-3.89532	6.41749e-10	3.90927	1.52521	0.00143717	0.0311543
Solyc01g079950	SL3.0ch01	78956514	78958514	-	2499	4888	2526	5957	33.83	29.777	-4.0525	7.15905e-08	2.12457	2.78191	0.00326246	0.0574288
Solyc01g079960	SL3.0ch01	78963624	78965624	+	4128	8707	4076	10410	32.162	28.138	-4.02454	1.28714e-12	-1.99379	-2.71896	1	1
Solyc01g080030	SL3.0ch01	79011260	79013260	-	1765	5135	1791	5658	25.58	24.043	-1.53621	0.018478	-6.72043	-2.23906	0.000722373	0.018535
Solyc01g080040	SL3.0ch01	79009724	79011724	+	1793	6775	1786	7734	20.927	18.761	-2.1662	0.000222176	0.268687	3.75807	0.471718	1
Solyc01g080180	SL3.0ch01	79248510	79250510	+	243	2947	316	4526	7.618	6.526	-1.09133	0.0341274	0.0804552	2.77329	0.844648	1
Solyc01g080210	SL3.0ch01	79283483	79285483	-	1354	9787	1419	11862	12.153	10.684	-1.46887	0.00027497	0.550006	4.33187	0.180654	0.76472
Solyc01g080220	SL3.0ch01	79285546	79287546	+	4379	6353	4541	7469	40.803	37.81	-2.99305	4.51915e-06	1.63926	4.09671	0.03672	0.311674
Solyc01g080240	SL3.0ch01	79313065	79315065	+	1317	6322	1138	6897	17.24	14.163	-3.07744	1.8176e-07	-0.0433904	6.1448	0.869454	1
Solyc01g080290	SL3.0ch01	79387134	79389134	+	127	1114	100	1137	10.234	8.084	-2.14961	0.0359937	0.415183	0.0283545	0.704509	1
Solyc01g080450	SL3.0ch01	79546107	79548107	-	1288	5312	1350	6126	19.515	18.058	-1.45737	0.0154215	-0.840884	4.11805	0.00972788	0.126626
Solyc01g080460	SL3.0ch01	79547819	79549819	+	5501	7755	4858	8475	41.498	36.436	-5.06228	1.20866e-16	0.108737	10.0516	0.7669	1
Solyc01g080520	SL3.0ch01	79616012	79618012	+	270	1053	67	850	20.408	7.306	-13.1017	4.74988e-18	-5.12548e-15	-3.87151	1	1
Solyc01g080540	SL3.0ch01	79640916	79642916	+	3368	9138	2940	8909	26.931	24.812	-2.11885	0.000145641	0.115281	3.94673	0.806836	1
Solyc01g080550	SL3.0ch01	79656033	79658033	-	7643	8331	7175	8830	47.847	44.83	-3.01676	9.45338e-08	4.4361	-3.1831	0.142364	0.677049
Solyc01g080570	SL3.0ch01	79669163	79671163	-	2764	8522	2475	8805	24.491	21.941	-2.54903	6.59233e-06	10.1371	0.22227	0.000591801	0.016036
Solyc01g080600	SL3.0ch01	79691478	79693478	+	1799	5105	1817	6814	26.057	21.052	-5.00534	7.9323e-13	2.96009	2.78218	0.00037419	0.0111348
Solyc01g080670	SL3.0ch01	79767699	79769699	+	7740	10350	8339	11587	42.786	41.85	-0.936225	0.0339917	-0.284783	5.93951	0.384885	1
Solyc01g080705	SL3.0ch01	79807217	79809217	+	11	79	7	276	12.222	2.473	-9.74872	0.000510626	-0.114482	2.76364	0.808008	1
Solyc01g080770	SL3.0ch01	79854306	79856306	-	4727	5724	4990	6716	45.23	42.628	-2.60241	8.89392e-05	-1.63204	1.93995	0.00926208	0.121796
Solyc01g080880	SL3.0ch01	80055841	80057841	-	5708	6571	5959	7960	46.486	42.812	-3.67389	4.31608e-09	0.0347115	6.40374	0.8878	1
Solyc01g080890	SL3.0ch01	80068458	80070458	+	40	587	6	283	6.38	2.076	-4.30346	0.00335943	0.0426601	6.34294	0.895869	1
Solyc01g080900	SL3.0ch01	80093309	80095309	+	664	8592	577	8791	7.174	6.159	-1.01446	0.00373088	-0.630316	4.90171	0.257608	0.903788
Solyc01g080920	SL3.0ch01	80114794	80116794	+	527	3626	411	4156	12.69	8.999	-3.69028	4.48377e-08	-5.12548e-15	-3.76922	1	1
Solyc01g081010	SL3.0ch01	80177540	80179540	-	1249	3069	1150	3312	28.925	25.773	-3.15223	0.000714261	-0.0640583	9.5228	0.811209	1
Solyc01g081020	SL3.0ch01	80181397	80183397	-	449	2064	436	2497	17.867	14.865	-3.00177	0.00196289	-2.20361	-2.11208	0.157133	0.713613
Solyc01g081040	SL3.0ch01	80205062	80207062	+	3760	8436	3376	8529	30.83	28.358	-2.47195	2.72594e-05	-4.71766	-3.06191	0.153165	0.705069
Solyc01g081160	SL3.0ch01	80325475	80327475	-	174	1631	112	1515	9.64	6.884	-2.75605	0.00245703	0.550254	0.0753379	0.848519	1
Solyc01g081177	SL3.0ch01	80333680	80335680	+	551	6851	506	7570	7.444	6.265	-1.17846	0.00273264	-0.906877	0.971707	0.0943525	0.543097
Solyc01g081190	SL3.0ch01	80336055	80338055	+	1503	3798	2237	6478	28.353	25.668	-2.68475	0.00041654	-0.165901	1.53734	0.738018	1
Solyc01g081250	SL3.0ch01	80363912	80365912	+	8183	8628	7749	8595	48.676	47.412	-1.26457	0.012456	-0.889611	-0.648894	0.318175	0.995121
Solyc01g081260	SL3.0ch01	80366334	80368334	+	3150	5141	2749	6114	37.993	31.017	-6.97642	4.66218e-21	-5.12548e-15	-3.5084	1	1
Solyc01g081300	SL3.0ch01	80386953	80388953	+	5861	10599	6496	12481	35.608	34.231	-1.37662	0.00438052	0.0434169	4.84665	0.882856	1
Solyc01g081310	SL3.0ch01	80394371	80396371	+	283	791	130	510	26.35	20.313	-6.03759	0.0033193	2.81702	2.61312	2.7199e-06	0.000229446
Solyc01g081320	SL3.0ch01	80400875	80402875	-	89	962	62	897	8.468	6.465	-2.00306	0.0454437	-5.12548e-15	-3.87079	1	1
Solyc01g081325	SL3.0ch01	80403477	80405477	-	175	2066	125	2034	7.809	5.79	-2.0193	0.00530187	-5.12548e-15	-3.91086	1	1
Solyc01g081460	SL3.0ch01	80529527	80531527	-	890	3129	737	2937	22.145	20.06	-2.08493	0.0144541	-0.041892	2.88776	0.923781	1
Solyc01g081520	SL3.0ch01	80577140	80579140	-	2492	5289	730	2170	32.027	25.172	-6.85432	1.06294e-11	0.0152273	5.94881	0.953694	1
Solyc01g081530	SL3.0ch01	80579704	80581704	-	5246	8824	3929	7907	37.285	33.195	-4.08967	1.66927e-11	-5.12548e-15	-3.87171	1	1
Solyc01g081535	SL3.0ch01	80579812	80581812	+	4406	8912	3344	8037	33.083	29.382	-3.70074	8.29847e-10	-5.12548e-15	-3.91086	1	1
Solyc01g081630	SL3.0ch01	80678640	80680640	+	222	7302	132	5741	2.951	2.248	-0.702985	0.00756554	-5.12548e-15	-3.86962	1	1
Solyc01g081640	SL3.0ch01	80690362	80692362	-	2406	8619	2193	10123	21.823	17.806	-4.01702	4.92142e-14	1.84373	-2.20332	1	1
Solyc01g073640	SL3.0ch01	80896020	80898020	+	4135	6512	5039	8615	38.837	36.905	-1.93229	0.00146461	5.06901	5.36925	5.14696e-06	0.000383534
Solyc01g073650	SL3.0ch01	80911368	80913368	-	3368	9668	3397	10356	25.836	24.7	-1.13608	0.0180821	0.189042	6.87702	0.489576	1
Solyc01g073670	SL3.0ch01	80930440	80932440	-	2442	4534	2450	6237	35.006	28.203	-6.80267	4.25808e-19	2.01789	-1.35731	0.30723	0.979899
Solyc01g073700	SL3.0ch01	80956511	80958511	-	551	7198	457	7659	7.111	5.631	-1.47974	0.000120546	-5.12548e-15	-3.91086	1	1
Solyc01g073710	SL3.0ch01	80958567	80960567	+	3614	9814	4229	12366	26.914	25.484	-1.43033	0.00335574	1.09582	2.77624	0.0203459	0.212291
Solyc01g073730	SL3.0ch01	80987627	80989627	-	4216	8087	4281	9538	34.268	30.979	-3.28898	2.56041e-08	-0.176998	3.45594	0.618921	1
Solyc01g073740	SL3.0ch01	80989755	80991755	+	2324	11030	2144	11646	17.403	15.547	-1.85553	3.79622e-05	0.0765374	6.98425	0.813956	1
Solyc01g073745	SL3.0ch01	81000490	81002490	+	1507	5140	1473	5588	22.672	20.861	-1.81081	0.00665903	-5.12548e-15	-3.82946	1	1
Solyc01g073810	SL3.0ch01	81056169	81058169	-	179	547	17	493	24.656	3.333	-21.3223	1.31949e-26	1.80525	-3.31575	1	1
Solyc01g073820	SL3.0ch01	81058530	81060530	-	7597	9249	8295	10728	45.097	43.605	-1.49165	0.00306299	7.56478	1.13884	2.71865e-05	0.00145788
Solyc01g073840	SL3.0ch01	81069641	81071641	-	1402	2434	1118	2427	36.548	31.537	-5.01111	6.71385e-06	5.09965	-3.0414	0.121868	0.623957
Solyc01g073860	SL3.0ch01	81080113	81082113	-	7345	4821	8904	6149	60.373	59.151	-1.22217	0.0225025	3.09892	-3.7552	0.376948	1
Solyc01g073890	SL3.0ch01	81094087	81096087	+	5303	9330	5809	11203	36.24	34.146	-2.09352	9.11099e-05	6.51274	3.1285	8.91587e-10	3.02856e-07
Solyc01g073910	SL3.0ch01	81129116	81131116	+	1877	8339	1614	7825	18.373	17.099	-1.27387	0.0114038	-0.947059	1.51095	0.366771	1
Solyc01g073920	SL3.0ch01	81151771	81153771	-	4754	7779	3741	7547	37.932	33.141	-4.79047	4.13281e-14	-0.651942	3.52592	0.0669359	0.450454
Solyc01g073930	SL3.0ch01	81151185	81153185	+	4697	6512	3708	6905	41.904	34.938	-6.96554	3.70749e-25	-0.00365391	3.53811	0.994491	1
Solyc01g073980	SL3.0ch01	81205090	81207090	-	7463	5871	8619	7952	55.97	52.013	-3.95715	2.25797e-11	-5.12548e-15	-3.91086	1	1
Solyc01g074010	SL3.0ch01	81222780	81224780	-	175	6616	126	7778	2.577	1.594	-0.982811	3.0589e-05	-0.212322	5.6552	0.452246	1
Solyc01g074020	SL3.0ch01	81222222	81224222	+	178	6192	125	7530	2.794	1.633	-1.16143	3.21474e-06	-0.276194	3.32389	0.436236	1
Solyc01g074065	SL3.0ch01	81472056	81474056	-	1089	5811	997	6003	15.783	14.243	-1.53975	0.00678955	-5.12548e-15	-3.91086	1	1
Solyc01g086760	SL3.0ch01	81601905	81603905	+	5674	7234	6897	9157	43.957	42.961	-0.99598	0.0451937	-5.12548e-15	-3.87342	1	1
Solyc01g086810	SL3.0ch01	81631138	81633138	-	1356	6440	1079	6912	17.394	13.503	-3.89084	3.43567e-11	-0.260609	4.78978	0.413945	1
Solyc01g086890	SL3.0ch01	81690671	81692671	-	12011	7939	13399	9268	60.206	59.112	-1.09315	0.0128324	-0.435564	7.66441	0.0822746	0.505617
Solyc01g086897	SL3.0ch01	81690119	81692119	+	10666	9157	11816	10573	53.806	52.776	-1.03027	0.0191995	-5.12548e-15	-3.91086	1	1
Solyc01g086920	SL3.0ch01	81700614	81702614	+	1183	6162	1332	7496	16.106	15.088	-1.01784	0.0394195	-5.12548e-15	0.458823	1	1
Solyc01g086953	SL3.0ch01	81730188	81732188	-	1842	4766	1197	3936	27.875	23.32	-4.55561	3.56168e-08	-5.12548e-15	-3.69836	1	1
Solyc01g086970	SL3.0ch01	81767133	81769133	-	9189	11892	9709	13574	43.589	41.7	-1.88906	5.64328e-05	-0.33728	9.13983	0.310515	0.984618
Solyc01g086995	SL3.0ch01	81800283	81802283	+	165	5366	127	6037	2.983	2.06	-0.922835	0.00116774	-1.80328	0.565131	0.0131016	0.15605
Solyc01g087003	SL3.0ch01	81805774	81807774	-	2041	3291	1477	4222	38.278	25.917	-12.3615	8.85848e-43	-0.0450854	0.535414	0.948908	1
Solyc01g087040	SL3.0ch01	81838925	81840925	+	6197	8424	5688	8120	42.384	41.194	-1.19073	0.0227616	-0.555948	3.18908	0.248675	0.888029
Solyc01g087080	SL3.0ch01	81889287	81891287	+	1184	5217	676	4496	18.497	13.07	-5.42673	7.63385e-15	-0.37972	0.238367	0.68892	1
Solyc01g087130	SL3.0ch01	81928960	81930960	+	2650	8078	2540	8324	24.702	23.38	-1.32174	0.0135787	-5.12548e-15	-3.91086	1	1
Solyc01g087210	SL3.0ch01	82016312	82018312	-	3720	9206	3839	10581	28.779	26.623	-2.15646	6.61288e-05	0.386832	8.22187	0.244197	0.879537
Solyc01g087250	SL3.0ch01	82071217	82073217	-	3843	11232	3621	11836	25.493	23.426	-2.06626	2.68239e-05	0.242485	4.21367	0.536227	1
Solyc01g087260	SL3.0ch01	82083087	82085087	-	9292	8956	10625	10913	50.921	49.331	-1.58923	0.00118103	0.253326	8.39692	0.396696	1
Solyc01g087280	SL3.0ch01	82089600	82091600	+	823	7179	619	6743	10.285	8.408	-1.87689	6.10115e-05	-5.12548e-15	-3.91086	1	1
Solyc01g087300	SL3.0ch01	82116836	82118836	-	619	1723	402	1952	26.43	17.077	-9.35309	2.60475e-14	0.204589	4.4107	0.495024	1
Solyc01g087330	SL3.0ch01	82162401	82164401	-	387	4572	372	5735	7.804	6.091	-1.71262	0.000345493	-0.695699	-0.035027	0.289667	0.956057
Solyc01g087332	SL3.0ch01	82168963	82170963	-	66	556	39	469	10.611	7.677	-2.93377	0.0493051	-0.222543	1.13579	0.654124	1
Solyc01g087340	SL3.0ch01	82180221	82182221	-	1168	3761	1071	4292	23.696	19.97	-3.72632	5.46988e-06	-1.08085	1.30541	0.0147857	0.170171
Solyc01g087360	SL3.0ch01	82188979	82190979	-	21	434	5	300	4.615	1.639	-2.97604	0.021583	-0.253458	-0.643044	0.828976	1
Solyc01g087380	SL3.0ch01	82190435	82192435	-	1534	4222	972	4085	26.65	19.221	-7.42957	3.01524e-19	-0.354917	3.81304	0.28709	0.951306
Solyc01g087410	SL3.0ch01	82245870	82247870	-	367	2023	427	3027	15.356	12.362	-2.99317	0.000822624	-0.212215	2.0299	0.734408	1
Solyc01g087415	SL3.0ch01	82241086	82243086	-	383	1487	203	1126	20.481	15.275	-5.20664	0.000146372	-5.12548e-15	-3.91086	1	1
Solyc01g087430	SL3.0ch01	82279647	82281647	-	2745	10431	3072	12410	20.833	19.842	-0.990936	0.0206706	-0.65215	4.78414	0.0435177	0.346591
Solyc01g087450	SL3.0ch01	82291310	82293310	+	49	354	0	93	12.159	0	-12.1588	2.81208e-05	-0.15848	0.612923	0.903565	1
Solyc01g087460	SL3.0ch01	82298979	82300979	+	93	2981	97	4014	3.025	2.36	-0.665851	0.0439006	-5.12548e-15	-3.69902	1	1
Solyc01g087470	SL3.0ch01	82302262	82304262	+	3015	4045	2725	4185	42.705	39.436	-3.26978	7.94836e-05	0.144654	1.88005	0.766341	1
Solyc01g087490	SL3.0ch01	82302262	82304262	+	3015	4045	2725	4185	42.705	39.436	-3.26978	7.94836e-05	1.71422	0.0317878	0.0968904	0.551457
Solyc01g087520	SL3.0ch01	82334213	82336213	+	3856	4715	5193	6662	44.989	43.804	-1.18461	0.047259	0.596765	5.89147	0.0726086	0.472025
Solyc01g087550	SL3.0ch01	82367092	82369092	-	1504	8884	1234	9303	14.478	11.711	-2.76713	5.36976e-09	0.280551	5.39971	0.328441	1
Solyc01g087565	SL3.0ch01	82394234	82396234	+	2361	9016	2353	10068	20.752	18.944	-1.80867	0.000390724	-5.12548e-15	-3.71806	1	1
Solyc01g087570	SL3.0ch01	82397495	82399495	-	700	5826	759	8071	10.726	8.596	-2.13063	1.00643e-05	0.117165	-3.44605	1	1
Solyc01g087610	SL3.0ch01	82451021	82453021	-	8087	5976	10786	8575	57.506	55.71	-1.79558	0.000822196	0.234306	3.90371	0.52182	1
Solyc01g087630	SL3.0ch01	82459189	82461189	-	69	270	65	588	20.354	9.954	-10.3999	9.78873e-06	-1.97788	-3.83164	1	1
Solyc01g087940	SL3.0ch01	82669949	82671949	-	26	397	12	733	6.147	1.611	-4.53583	4.61254e-05	0.584478	-1.17666	0.509046	1
Solyc01g087950	SL3.0ch01	82673040	82675040	-	5244	7344	4952	7816	41.659	38.784	-2.87426	3.59146e-06	0.543944	6.00203	0.364379	1
Solyc01g087960	SL3.0ch01	82680379	82682379	-	4514	7395	5186	9770	37.904	34.675	-3.22906	7.09181e-08	-5.12548e-15	-3.91086	1	1
Solyc01g087980	SL3.0ch01	82701703	82703703	+	4121	4469	4800	5548	47.974	46.386	-1.58861	0.0164895	2.70221	-1.00325	0.0166342	0.183926
Solyc01g087990	SL3.0ch01	82711093	82713093	-	3841	10798	3797	11860	26.238	24.251	-1.987	6.51774e-05	-0.305627	5.38036	0.304708	0.976944
Solyc01g088020	SL3.0ch01	82742192	82744192	+	2742	8085	2695	9294	25.326	22.479	-2.84664	6.46328e-07	0.00321101	7.50668	0.991027	1
Solyc01g088050	SL3.0ch01	82772932	82774932	+	4043	9000	3916	9797	30.997	28.557	-2.44063	1.3438e-05	-0.139532	1.34201	0.847898	1
Solyc01g088110	SL3.0ch01	82855388	82857388	+	2456	3346	2027	4525	42.33	30.937	-11.3931	3.49687e-38	-5.12548e-15	-3.91086	1	1
Solyc01g088130	SL3.0ch01	82864995	82866995	-	6834	4959	5740	4553	57.95	55.766	-2.18358	0.000841044	0.168753	0.740917	0.818774	1
Solyc01g088180	SL3.0ch01	82916938	82918938	+	9731	6181	10025	8082	61.155	55.365	-5.78977	3.10727e-26	-5.12548e-15	-3.59887	1	1
Solyc01g088260	SL3.0ch01	82944190	82946190	-	2917	4012	2670	3928	42.098	40.467	-1.63162	0.0287909	-5.12548e-15	-3.91086	1	1
Solyc01g088270	SL3.0ch01	82944625	82946625	-	3753	5513	3730	5945	40.503	38.553	-1.94994	0.00402476	1.94371	-3.86778	1	1
Solyc01g088327	SL3.0ch01	82995295	82997295	-	9574	10360	11291	12666	48.028	47.13	-0.898219	0.0318792	-3.37674	-3.09549	0.339622	1
Solyc01g088340	SL3.0ch01	82996709	82998709	-	12245	9854	14411	12120	55.41	54.318	-1.09216	0.00955574	1.79193	-3.38279	1	1
Solyc01g088350	SL3.0ch01	82997759	82999759	+	6929	9537	7657	11603	42.081	39.756	-2.32468	9.24013e-06	-0.188181	4.35733	0.54303	1
Solyc01g088420	SL3.0ch01	83090931	83092931	+	5248	6495	4787	6523	44.69	42.325	-2.36508	0.000247948	2.4846	0.197407	0.00626836	0.0918127
Solyc01g088430	SL3.0ch01	83104446	83106446	+	6038	7221	4691	7493	45.539	38.501	-7.03757	8.11078e-29	-0.335953	-1.19813	0.706658	1
Solyc01g088480	SL3.0ch01	83142965	83144965	-	37	1512	6	1136	2.389	0.525	-1.86324	6.54892e-05	0.691097	5.09627	0.0820324	0.505101
Solyc01g088540	SL3.0ch01	83199081	83201081	+	2209	6028	2601	8081	26.818	24.349	-2.46864	0.000101742	-5.12548e-15	-3.91086	1	1
Solyc01g088560	SL3.0ch01	83213794	83215794	-	6072	8935	5543	9861	40.461	35.984	-4.47696	3.61012e-15	1.32837	6.58984	7.99506e-05	0.00333295
Solyc01g088570	SL3.0ch01	83217566	83219566	+	8412	8037	9156	9204	51.14	49.869	-1.27061	0.0106645	0.326955	5.67212	0.339659	1
Solyc01g088580	SL3.0ch01	83222709	83224709	+	1583	6964	1563	7509	18.521	17.229	-1.29228	0.0148378	-5.12548e-15	-3.91086	1	1
Solyc01g088590	SL3.0ch01	83230008	83232008	-	5257	9898	4744	10522	34.688	31.076	-3.61263	4.7412e-11	-0.266924	5.42661	0.534092	1
Solyc01g088700	SL3.0ch01	83327434	83329434	-	5060	10590	4939	11890	32.332	29.348	-2.98412	1.04475e-08	-0.0487246	7.38163	0.877838	1
Solyc01g088750	SL3.0ch01	83389516	83391516	-	913	2714	1043	3928	25.172	20.982	-4.19062	5.69323e-06	-0.0934511	2.18076	0.835282	1
Solyc01g088760	SL3.0ch01	83388260	83390260	+	904	2525	1021	3827	26.363	21.06	-5.30314	3.31545e-08	-0.680782	5.66555	0.0804409	0.500248
Solyc01g088830	SL3.0ch01	83424250	83426250	+	1058	3275	946	3859	24.417	19.688	-4.72944	7.62748e-08	5.46458	-2.54205	0.140568	0.672898
Solyc01g089907	SL3.0ch01	83493671	83495671	-	7132	5587	7929	6605	56.074	54.555	-1.51875	0.00726005	0.110349	0.721924	0.878248	1
Solyc01g089940	SL3.0ch01	83521680	83523680	-	2529	7634	2968	9574	24.884	23.664	-1.2199	0.0188821	-5.12548e-15	-3.67132	1	1
Solyc01g089990	SL3.0ch01	83585037	83587037	-	2773	3955	1393	3149	41.216	30.669	-10.5465	3.31889e-29	1.82558	-3.26811	1	1
Solyc01g090000	SL3.0ch01	83588119	83590119	-	1376	3677	1363	5233	27.231	20.664	-6.56731	6.13705e-16	-5.12548e-15	-3.91086	1	1
Solyc01g090010	SL3.0ch01	83593768	83595768	-	6387	4374	7295	5309	59.353	57.878	-1.47477	0.013062	-5.12548e-15	-3.91086	1	1
Solyc01g090030	SL3.0ch01	83595510	83597510	+	7289	3096	8586	4793	70.188	64.175	-6.01257	9.03203e-22	3.42294	-3.68615	0.36445	1
Solyc01g090090	SL3.0ch01	83622794	83624794	-	8220	3179	9080	4284	72.112	67.944	-4.16786	2.68836e-12	1.80909	-3.87049	1	1
Solyc01g090120	SL3.0ch01	83635927	83637927	-	2810	6641	2769	8566	29.732	24.429	-5.30354	4.50841e-17	-5.12548e-15	-3.86883	1	1
Solyc01g090160	SL3.0ch01	83669649	83671649	-	2776	8375	2057	7593	24.895	21.316	-3.57857	2.07518e-09	1.89835	-3.43711	1	1
Solyc01g090220	SL3.0ch01	83732906	83734906	-	1072	1662	1438	2655	39.21	35.133	-4.07679	0.000509	-5.12548e-15	-3.91086	1	1
Solyc01g090225	SL3.0ch01	83744465	83746465	-	9072	9420	9505	10452	49.059	47.627	-1.43165	0.00337791	-0.610223	3.89423	0.0775895	0.48963
Solyc01g090240	SL3.0ch01	83781805	83783805	+	2949	9652	3090	11860	23.403	20.669	-2.73401	7.35235e-08	0.0657046	2.1401	0.931818	1
Solyc01g090250	SL3.0ch01	83786611	83788611	+	652	961	805	1453	40.422	35.651	-4.77056	0.00190113	-0.747688	0.636838	0.379149	1
Solyc01g090300	SL3.0ch01	83837126	83839126	+	3334	7834	2879	8281	29.853	25.797	-4.05566	3.40818e-11	4.81882	-2.0277	0.0728195	0.472963
Solyc01g090310	SL3.0ch01	83845468	83847468	+	2691	9852	2612	10405	21.454	20.066	-1.38813	0.00407555	7.74674	0.731142	5.64526e-06	0.000408744
Solyc01g090370	SL3.0ch01	83946554	83948554	-	3447	6541	2964	6246	34.511	32.182	-2.329	0.000494755	-5.12548e-15	-3.91086	1	1
Solyc01g090400	SL3.0ch01	83959048	83961048	+	17	173	0	40	8.947	0	-8.94737	0.0259355	-0.564946	0.953671	0.332643	1
Solyc01g090430	SL3.0ch01	83994206	83996206	+	9606	5165	12782	7739	65.033	62.287	-2.74542	1.84202e-07	-0.31207	3.65123	0.473156	1
Solyc01g090440	SL3.0ch01	84004825	84006825	-	4211	3615	4192	4305	53.808	49.335	-4.47276	1.87165e-08	-0.451513	0.407583	0.656542	1
Solyc01g090450	SL3.0ch01	84003935	84005935	+	4229	4374	4200	5058	49.157	45.366	-3.7911	5.23414e-07	-0.125068	4.03214	0.710926	1
Solyc01g090500	SL3.0ch01	84040408	84042408	+	447	2689	527	4081	14.254	11.437	-2.81719	0.000231844	0.296172	5.06921	0.327736	1
Solyc01g090510	SL3.0ch01	84050617	84052617	+	6251	4913	7359	6092	55.992	54.71	-1.28279	0.0240083	-0.760365	0.387646	0.337834	1
Solyc01g090520	SL3.0ch01	84056023	84058023	+	6470	9970	6214	11293	39.355	35.494	-3.86086	6.00984e-13	-5.12548e-15	-3.68542	1	1
Solyc01g090640	SL3.0ch01	84174203	84176203	-	3640	6468	3554	6692	36.011	34.687	-1.32437	0.0263068	-0.823353	1.27376	0.12906	0.643015
Solyc01g090645	SL3.0ch01	84174203	84176203	-	3640	6468	3554	6692	36.011	34.687	-1.32437	0.0263068	1.00636	-3.05577	0.670193	1
Solyc01g090660	SL3.0ch01	84181229	84183229	+	6251	8124	5803	8355	43.485	40.987	-2.49779	1.9917e-05	-5.12548e-15	-3.42599	1	1
Solyc01g090670	SL3.0ch01	84188725	84190725	+	2130	2693	2131	3116	44.163	40.614	-3.5497	0.000266542	-0.568097	4.50659	0.148992	0.695165
Solyc01g090700	SL3.0ch01	84222407	84224407	-	7853	19537	8188	21816	28.671	27.29	-1.38135	0.000197028	-0.107324	6.96707	0.728259	1
Solyc01g090710	SL3.0ch01	84222861	84224861	+	8199	19321	8380	20932	29.793	28.589	-1.2039	0.00118405	-3.67128	-0.593535	0.000333373	0.0102441
Solyc01g090730	SL3.0ch01	84241484	84243484	+	3472	9591	3541	10313	26.579	25.559	-1.01948	0.0299007	-3.40486	1.26263	0.316788	0.993764
Solyc01g090800	SL3.0ch01	84381735	84383735	+	3011	3621	3392	6023	45.401	36.028	-9.37347	1.37408e-31	-5.12548e-15	-2.87512	1	1
Solyc01g090840	SL3.0ch01	84416643	84418643	+	2202	7028	1597	7488	23.857	17.578	-6.27856	7.83416e-25	-1.55002	1.83736	0.0662728	0.448064
Solyc01g090900	SL3.0ch01	84484367	84486367	+	5630	10212	5879	11983	35.538	32.913	-2.62499	5.39187e-07	1.0444	-1.94682	0.466327	1
Solyc01g090920	SL3.0ch01	84501286	84503286	-	9200	8560	10577	10573	51.802	50.009	-1.79235	0.000343136	0.0121352	2.75828	0.989605	1
Solyc01g090925	SL3.0ch01	84492137	84494137	-	1877	6567	1562	7069	22.229	18.098	-4.13125	4.16689e-11	1.85015	-3.86959	1	1
Solyc01g090950	SL3.0ch01	84541050	84543050	-	183	3419	192	4304	5.081	4.27	-0.810048	0.0444485	-0.532521	4.10728	0.132527	0.651154
Solyc01g090960	SL3.0ch01	84546507	84548507	+	2613	7244	2475	7470	26.509	24.887	-1.6222	0.0057756	-5.12548e-15	-3.91086	1	1
Solyc01g090980	SL3.0ch01	84551406	84553406	+	3694	3026	3115	3002	54.97	50.924	-4.04658	5.07372e-06	3.13327	-3.4033	0.448677	1
Solyc01g090990	SL3.0ch01	84563336	84565336	-	3070	5746	3362	6839	34.823	32.958	-1.8655	0.00437586	-0.0120193	4.38712	0.969053	1
Solyc01g091000	SL3.0ch01	84579604	84581604	-	5473	8142	5907	9578	40.198	38.147	-2.05172	0.000284573	1.88861	-0.271288	1	1
Solyc01g091020	SL3.0ch01	84609114	84611114	-	1891	3425	2042	4067	35.572	33.426	-2.14577	0.00998405	0.380401	4.94011	0.173318	0.748749
Solyc01g091030	SL3.0ch01	84620756	84622756	+	3373	9513	2764	9103	26.176	23.291	-2.88421	2.16289e-07	4.10892	0.341311	0.000561254	0.0154304
Solyc01g091050	SL3.0ch01	84645695	84647695	-	2783	6589	1929	5877	29.695	24.712	-4.98308	8.03674e-13	-5.12548e-15	-3.87283	1	1
Solyc01g091070	SL3.0ch01	84662802	84664802	+	1010	4760	739	4245	17.504	14.827	-2.67688	0.000152721	-0.0847223	5.89524	0.747791	1
Solyc01g091090	SL3.0ch01	84688407	84690407	-	2544	5249	2747	6154	32.645	30.862	-1.78298	0.00820659	0.0917247	2.4526	0.853792	1
Solyc01g091100	SL3.0ch01	84691079	84693079	-	2295	9963	2529	11806	18.722	17.642	-1.08033	0.0134159	-5.05285	-2.16539	0.000168541	0.00599838
Solyc01g091110	SL3.0ch01	84698557	84700557	-	1275	6760	1030	6022	15.868	14.606	-1.26229	0.0183343	-5.12548e-15	-3.68818	1	1
Solyc01g091170	SL3.0ch01	84736088	84738088	+	1518	9099	1409	10355	14.298	11.977	-2.32061	3.99781e-07	1.11135	4.16794	0.0287824	0.266462
Solyc01g091200	SL3.0ch01	84760335	84762335	+	1261	9261	1028	8402	11.984	10.901	-1.08304	0.0101788	1.4875	2.17199	0.0225017	0.22742
Solyc01g091210	SL3.0ch01	84772551	84774551	-	135	2956	39	2039	4.368	1.877	-2.49071	7.25144e-07	-0.354509	4.72372	0.239635	0.87198
Solyc01g091220	SL3.0ch01	84775594	84777594	-	3581	8010	3942	9654	30.895	28.994	-1.90084	0.0007941	0.321316	6.38679	0.380946	1
Solyc01g091240	SL3.0ch01	84788461	84790461	-	10313	7459	10242	8089	58.029	55.873	-2.15692	3.42422e-05	-1.51271	1.26114	0.00588392	0.0879466
Solyc01g091250	SL3.0ch01	84793585	84795585	-	3706	5992	2997	5962	38.214	33.452	-4.76167	3.09427e-11	3.82151	-2.61534	0.184281	0.772399
Solyc01g091320	SL3.0ch01	84839609	84841609	-	6002	11177	5551	12497	34.938	30.757	-4.18114	2.90709e-16	3.80289	-1.43525	0.201811	0.805281
Solyc01g091330	SL3.0ch01	84857916	84859916	-	1357	3462	1480	4373	28.159	25.286	-2.87319	0.00067031	1.51217	-1.11442	0.312922	0.987612
Solyc01g091340	SL3.0ch01	84856729	84858729	+	1386	4560	1536	5844	23.31	20.813	-2.49678	0.000433695	0.763638	2.72733	0.137821	0.665041
Solyc01g091350	SL3.0ch01	84873541	84875541	-	334	5457	275	5604	5.768	4.678	-1.0899	0.00545545	-0.450082	4.72127	0.137466	0.664526
Solyc01g091360	SL3.0ch01	84872868	84874868	+	311	4814	258	4992	6.068	4.914	-1.15401	0.00669901	1.26903	0.204808	0.280068	0.940636
Solyc01g091380	SL3.0ch01	84898148	84900148	-	23730	8301	20417	7387	74.084	73.432	-0.6526	0.0362433	-0.0340226	1.88946	0.981949	1
Solyc01g091400	SL3.0ch01	84912068	84914068	-	962	4912	750	4754	16.377	13.626	-2.7508	4.03068e-05	3.3036	-3.78486	0.52149	1
Solyc01g091410	SL3.0ch01	84914774	84916774	-	2727	6349	3296	8345	30.046	28.314	-1.73256	0.00426789	-5.12548e-15	-3.91086	1	1
Solyc01g091435	SL3.0ch01	84934427	84936427	-	266	794	59	364	25.094	13.948	-11.1463	1.81833e-06	-0.546873	-1.38254	0.589287	1
Solyc01g091440	SL3.0ch01	84934346	84936346	-	271	997	59	364	21.372	13.948	-7.42425	0.0006403	-2.95121	-2.92403	0.28325	0.946672
Solyc01g091510	SL3.0ch01	85016596	85018596	-	7141	6877	8056	8255	50.942	49.39	-1.55166	0.00464103	-0.533712	5.14513	0.0459876	0.359067
Solyc01g091530	SL3.0ch01	85025737	85027737	-	5809	8598	6073	10065	40.321	37.632	-2.689	1.84095e-06	1.15876	7.31667	0.03689	0.312526
Solyc01g091600	SL3.0ch01	85064242	85066242	-	5226	9152	4890	8975	36.347	35.269	-1.07854	0.0309238	0.214994	4.91994	0.437605	1
Solyc01g091610	SL3.0ch01	85065154	85067154	+	5081	8722	4746	8573	36.811	35.633	-1.17753	0.0239899	-0.476205	0.987557	0.452037	1
Solyc01g091620	SL3.0ch01	85076647	85078647	-	4066	6517	4136	7479	38.42	35.609	-2.81098	1.53721e-05	0.0436997	5.82278	0.883511	1
Solyc01g091670	SL3.0ch01	85136987	85138987	+	6033	6600	5353	6413	47.756	45.495	-2.26038	0.000332309	-4.29287	-3.51261	0.27305	0.929874
Solyc01g091690	SL3.0ch01	85150533	85152533	-	1303	7962	1042	8736	14.064	10.657	-3.4071	2.56683e-12	-0.268972	7.92916	0.364097	1
Solyc01g091700	SL3.0ch01	85171584	85173584	+	10869	7559	10889	8445	58.981	56.32	-2.66043	2.34823e-07	-1.16075	1.59833	0.0603602	0.423286
Solyc01g091730	SL3.0ch01	85197953	85199953	-	3374	5511	3501	7259	37.974	32.537	-5.43694	7.33205e-15	-1.11702	0.279978	0.0348118	0.301281
Solyc01g091750	SL3.0ch01	85215645	85217645	-	1367	3077	1279	3731	30.761	25.529	-5.23163	2.58899e-08	-0.015974	5.00782	0.956023	1
Solyc01g091770	SL3.0ch01	85220021	85222021	+	5280	8608	5995	10300	38.018	36.79	-1.22801	0.0158123	2.61944	0.864137	0.529457	1
Solyc01g091840	SL3.0ch01	85264972	85266972	+	2031	5862	2207	7346	25.732	23.103	-2.62897	5.27662e-05	1.15329	3.49773	0.0454852	0.357015
Solyc01g091870	SL3.0ch01	85282502	85284502	+	12634	9319	13632	11354	57.55	54.559	-2.99167	1.58655e-10	-5.12548e-15	-3.07051	1	1
Solyc01g091880	SL3.0ch01	85293963	85295963	+	5262	6755	5001	8198	43.788	37.889	-5.89873	1.12842e-20	0.393482	5.58245	0.143998	0.681916
Solyc01g092950	SL3.0ch01	85369033	85371033	+	1080	5661	922	5642	16.021	14.046	-1.97505	0.00108055	-5.12548e-15	-3.42139	1	1
Solyc01g093965	SL3.0ch01	85405504	85407504	+	3050	4739	2873	4724	39.158	37.818	-1.34023	0.0440907	-5.12548e-15	-3.91086	1	1
Solyc01g093980	SL3.0ch01	85429781	85431781	+	326	3359	197	2515	8.847	7.264	-1.58266	0.0135334	-0.536855	0.126215	0.485648	1
Solyc01g093990	SL3.0ch01	85445217	85447217	-	4252	5030	3841	4832	45.809	44.287	-1.52223	0.0223669	-0.216986	1.71871	0.779443	1
Solyc01g094085	SL3.0ch01	85533105	85535105	+	41	499	0	219	7.593	0	-7.59259	1.25388e-06	-5.12548e-15	-3.91086	1	1
Solyc01g094100	SL3.0ch01	85558171	85560171	-	189	531	111	643	26.25	14.721	-11.5285	6.94586e-08	-0.180288	-3.00262	1	1
Solyc01g094110	SL3.0ch01	85561389	85563389	-	2446	5594	2431	6661	30.423	26.738	-3.68509	1.42146e-07	-5.12548e-15	-3.87283	1	1
Solyc01g094170	SL3.0ch01	85622084	85624084	-	6987	5796	7684	7160	54.659	51.765	-2.89351	1.91367e-06	0.229871	5.74051	0.492759	1
Solyc01g094180	SL3.0ch01	85622250	85624250	+	6970	5075	7670	6475	57.866	54.224	-3.64223	6.1046e-09	0.242071	0.50897	0.753899	1
Solyc01g094200	SL3.0ch01	85633525	85635525	+	3024	8573	2831	9324	26.076	23.291	-2.78488	8.49091e-07	0.154726	6.78235	0.557169	1
Solyc01g094260	SL3.0ch01	85677897	85679897	+	1828	9166	1961	10824	16.627	15.338	-1.28896	0.00442222	-5.12548e-15	-3.91086	1	1
Solyc01g094290	SL3.0ch01	85705934	85707934	-	1485	3266	1590	4167	31.257	27.619	-3.63803	4.41866e-05	-0.276946	5.63662	0.394481	1
Solyc01g094320	SL3.0ch01	85717860	85719860	-	1784	6060	1393	6470	22.743	17.716	-5.02761	1.60854e-14	-5.12548e-15	-3.72136	1	1
Solyc01g094315	SL3.0ch01	85717636	85719636	-	1780	6166	1376	6251	22.401	18.041	-4.36004	3.15042e-11	-5.12548e-15	-3.91086	1	1
Solyc01g094390	SL3.0ch01	85772067	85774067	+	5914	5652	5125	5322	51.133	49.057	-2.07548	0.0015394	-5.12548e-15	-3.91086	1	1
Solyc01g094400	SL3.0ch01	85778518	85780518	-	11999	9630	14399	11959	55.476	54.629	-0.847868	0.0330728	-5.12548e-15	-3.91086	1	1
Solyc01g094660	SL3.0ch01	85976649	85978649	+	3781	10170	3692	10994	27.102	25.14	-1.96241	0.000141092	-0.325016	5.12756	0.236501	0.866437
Solyc01g094690	SL3.0ch01	86009825	86011825	+	5552	8672	5470	10194	39.033	34.921	-4.11178	5.79896e-13	0.121157	5.78011	0.771931	1
Solyc01g094710	SL3.0ch01	86026922	86028922	-	2485	2101	2592	2881	54.187	47.36	-6.82689	2.33706e-11	-5.12548e-15	-3.63715	1	1
Solyc01g094720	SL3.0ch01	86025654	86027654	+	8398	7632	9588	9185	52.389	51.073	-1.31592	0.00873615	0.0824872	5.68749	0.814973	1
Solyc01g094760	SL3.0ch01	86056710	86058710	-	5615	3494	5498	4211	61.642	56.628	-5.01446	7.08526e-12	0.574411	2.57632	0.271391	0.927309
Solyc01g094820	SL3.0ch01	86106957	86108957	-	8231	5775	7216	5438	58.768	57.025	-1.74222	0.00275243	-0.0921682	2.8372	0.817031	1
Solyc01g094900	SL3.0ch01	86176173	86178173	+	996	4446	1006	5014	18.302	16.711	-1.59113	0.015074	-5.12548e-15	-3.91086	1	1
Solyc01g094910	SL3.0ch01	86193132	86195132	-	3192	8273	3320	9972	27.841	24.977	-2.86383	4.61164e-07	3.13871	-2.18533	0.103156	0.571638
Solyc01g094960	SL3.0ch01	86230631	86232631	+	2324	6261	1677	5236	27.07	24.259	-2.81183	6.56135e-05	0.816089	3.95048	0.0287305	0.266342
Solyc01g094970	SL3.0ch01	86243013	86245013	-	4751	6331	4694	8332	42.871	36.036	-6.8357	2.63973e-26	1.85426	-3.55374	1	1
Solyc01g094990	SL3.0ch01	86245547	86247547	+	6438	10139	6025	10548	38.837	36.354	-2.48263	3.61984e-06	3.72397	-2.78942	0.293671	0.960675
Solyc01g095010	SL3.0ch01	86257869	86259869	-	5780	7923	5015	8592	42.181	36.856	-5.32451	1.15103e-18	1.02763	4.42848	0.00479967	0.076572
Solyc01g095020	SL3.0ch01	86257474	86259474	+	6155	9039	5381	10194	40.509	34.549	-5.96045	3.53819e-26	-0.102088	6.03682	0.73391	1
Solyc01g095030	SL3.0ch01	86284326	86286326	-	4367	4005	5645	5832	52.162	49.185	-2.97664	3.3621e-05	-0.543971	5.29457	0.154474	0.707545
Solyc01g095080	SL3.0ch01	86331529	86333529	-	1516	5661	1349	6023	21.123	18.299	-2.82406	1.92602e-05	-0.555062	8.53518	0.448673	1
Solyc01g095120	SL3.0ch01	86379953	86381953	+	5317	5459	5120	5530	49.341	48.075	-1.26601	0.0336162	0.199713	3.38311	0.639913	1
Solyc01g095140	SL3.0ch01	86395517	86397517	+	2991	6516	3132	7854	31.461	28.509	-2.95202	4.95306e-06	6.5603	6.16243	3.18531e-13	2.71267e-10
Solyc01g095160	SL3.0ch01	86400328	86402328	+	61	1007	48	1316	5.712	3.519	-2.19255	0.00632293	-0.171757	1.62542	0.763839	1
Solyc01g095230	SL3.0ch01	86452443	86454443	-	11926	14837	13439	18871	44.562	41.594	-2.96759	1.17519e-12	-0.431773	4.44785	0.131561	0.649418
Solyc01g095300	SL3.0ch01	86489460	86491460	+	5637	8475	6027	11167	39.945	35.053	-4.8918	2.87328e-18	0.752066	3.93611	0.137109	0.663993
Solyc01g095330	SL3.0ch01	86508906	86510906	-	3289	3240	3564	4328	50.375	45.16	-5.21559	9.01088e-10	-5.12548e-15	-3.91086	1	1
Solyc01g095350	SL3.0ch01	86510074	86512074	-	5423	5759	5311	5943	48.498	47.192	-1.30548	0.0270653	3.11769	-2.96546	0.381737	1
Solyc01g095360	SL3.0ch01	86509905	86511905	+	5423	5779	5314	6378	48.411	45.45	-2.96112	8.12633e-06	2.86981	-0.444271	0.0314105	0.281441
Solyc01g095480	SL3.0ch01	86602816	86604816	-	13505	8188	17533	10991	62.255	61.468	-0.787569	0.0369115	-0.58021	3.10827	0.176925	0.75671
Solyc01g095540	SL3.0ch01	86644551	86646551	-	51	1056	43	1462	4.607	2.857	-1.7499	0.0112739	-0.48716	5.00978	0.0623682	0.430986
Solyc01g095550	SL3.0ch01	86643907	86645907	+	57	948	23	1201	5.672	1.879	-3.79256	2.11777e-06	-0.0636001	-2.99611	1	1
Solyc01g095560	SL3.0ch01	86647244	86649244	+	27	24	30	684	52.941	4.202	-48.7395	1.59373e-19	0.265104	2.60506	0.563549	1
Solyc01g095580	SL3.0ch01	86666328	86668328	+	5956	9984	5797	12562	37.365	31.576	-5.78933	2.50204e-28	-0.839984	6.68358	0.00606789	0.0895845
Solyc01g095590	SL3.0ch01	86681539	86683539	+	7026	6567	8749	8994	51.688	49.31	-2.37878	2.94791e-05	-0.481698	4.68218	0.119845	0.61847
Solyc01g095690	SL3.0ch01	86752465	86754465	+	1240	2087	660	1571	37.271	29.583	-7.68767	4.90122e-09	-2.98457	1.43785	0.00259753	0.0487196
Solyc01g095780	SL3.0ch01	86843880	86845880	-	6208	8508	6898	10782	42.185	39.016	-3.16954	1.27257e-08	-5.12548e-15	-3.52653	1	1
Solyc01g095830	SL3.0ch01	86869300	86871300	-	2853	8514	2091	7358	25.099	22.129	-2.96964	7.14132e-07	-5.12548e-15	-3.91086	1	1
Solyc01g095840	SL3.0ch01	86874065	86876065	-	2466	9531	2299	9409	20.555	19.636	-0.918993	0.0405241	-5.12548e-15	-3.87171	1	1
Solyc01g095930	SL3.0ch01	86940743	86942743	+	261	3132	118	4548	7.692	2.529	-5.16337	5.45561e-26	-1.83841	5.62942	3.6507e-05	0.00182882
Solyc01g095970	SL3.0ch01	86966021	86968021	-	11870	10620	13934	12858	52.779	52.008	-0.770951	0.0444681	0.168972	5.59864	0.588557	1
Solyc01g095990	SL3.0ch01	86974470	86976470	+	4426	6795	4219	8432	39.444	33.349	-6.09476	9.86433e-22	1.07625	7.01534	0.00118835	0.026936
Solyc01g096030	SL3.0ch01	86998330	87000330	-	6221	11178	7094	14217	35.755	33.288	-2.46696	5.06581e-07	-0.200599	3.3166	0.577738	1
Solyc01g096080	SL3.0ch01	87064713	87066713	+	4059	7408	3780	7404	35.397	33.798	-1.59894	0.00701976	-0.342939	3.51179	0.439427	1
Solyc01g096090	SL3.0ch01	87078039	87080039	-	3807	6872	4212	8004	35.649	34.479	-1.17003	0.0335264	-0.555872	7.77241	0.0766662	0.486222
Solyc01g096130	SL3.0ch01	87119354	87121354	-	3078	10811	2104	9482	22.161	18.16	-4.00157	8.84497e-15	-0.197438	5.41583	0.506007	1
Solyc01g096170	SL3.0ch01	87138763	87140763	+	45	309	0	21	12.712	0	-12.7119	0.0457884	-1.77384	-0.534058	0.139826	0.670864
Solyc01g096180	SL3.0ch01	87150412	87152412	-	1371	1572	1398	2852	46.585	32.894	-13.691	1.52117e-30	-0.299711	4.13262	0.356391	1
Solyc01g096220	SL3.0ch01	87187630	87189630	+	2064	4403	1807	4355	31.916	29.325	-2.59099	0.0011892	-0.155645	4.58392	0.660406	1
Solyc01g096240	SL3.0ch01	87202793	87204793	+	3134	7437	3478	9219	29.647	27.392	-2.25485	0.000135249	-0.340806	6.09913	0.28497	0.94834
Solyc01g096280	SL3.0ch01	87238789	87240789	-	7605	8937	7912	9731	45.974	44.845	-1.1289	0.020249	1.56341	0.110368	0.189291	0.781729
Solyc01g096300	SL3.0ch01	87260347	87262347	-	1266	7332	1336	8303	14.724	13.86	-0.863996	0.0486357	-0.0285833	1.59597	0.957128	1
Solyc01g096320	SL3.0ch01	87266918	87268918	-	1380	4877	1364	6003	22.055	18.515	-3.5403	3.99809e-07	-0.632841	4.98376	0.175994	0.75461
Solyc01g096340	SL3.0ch01	87288004	87290004	+	4837	11350	5255	13476	29.882	28.055	-1.82691	0.000150227	0.505756	5.99339	0.119906	0.618492
Solyc01g096360	SL3.0ch01	87313355	87315355	+	5180	7469	5652	8628	40.952	39.58	-1.37202	0.012668	7.02145	2.55265	4.95186e-09	1.35205e-06
Solyc01g096370	SL3.0ch01	87323357	87325357	+	734	3029	824	3919	19.506	17.373	-2.13274	0.00732203	3.51135	-1.05545	0.231728	0.85833
Solyc01g096410	SL3.0ch01	87389018	87391018	-	1125	5684	1071	5982	16.522	15.185	-1.33722	0.0179843	-3.3965	-1.20331	0.323021	1
Solyc01g096420	SL3.0ch01	87396320	87398320	+	5336	3516	5464	4484	60.28	54.926	-5.35455	3.84079e-13	4.51634	3.99097	0.000589649	0.0159898
Solyc01g096475	SL3.0ch01	87433476	87435476	+	356	2073	159	1276	14.656	11.08	-3.5761	0.0012219	0.0584057	3.07186	0.896667	1
Solyc01g096490	SL3.0ch01	87455537	87457537	-	1414	5907	1499	6935	19.314	17.773	-1.541	0.00816637	-0.313481	5.91128	0.377057	1
Solyc01g096510	SL3.0ch01	87472284	87474284	-	5250	10135	4880	10183	34.124	32.397	-1.72688	0.00104784	1.40365	3.86531	0.196711	0.796643
Solyc01g096580	SL3.0ch01	87529194	87531194	-	9909	6192	11507	7734	61.543	59.805	-1.73818	0.000675389	0.432025	7.04848	0.225788	0.848407
Solyc01g096590	SL3.0ch01	87534986	87536986	-	2203	2773	1779	2594	44.273	40.681	-3.59105	0.000370162	0.305736	6.81653	0.443144	1
Solyc01g096650	SL3.0ch01	87571584	87573584	-	1175	3930	926	3995	23.017	18.817	-4.19934	3.39511e-07	3.89375	-2.49827	0.165895	0.732322
Solyc01g096690	SL3.0ch01	87593075	87595075	-	2055	4799	829	4274	29.982	16.245	-13.7371	6.91272e-68	-5.12548e-15	-3.73058	1	1
Solyc01g096700	SL3.0ch01	87597592	87599592	-	91	3813	57	3234	2.331	1.732	-0.598946	0.0405345	-0.236793	8.35123	0.399964	1
Solyc01g096760	SL3.0ch01	87660661	87662661	-	2128	6504	2108	7492	24.652	21.958	-2.69412	1.84586e-05	0.161588	4.98743	0.586513	1
Solyc01g096780	SL3.0ch01	87659929	87661929	+	2107	5485	2104	6784	27.753	23.672	-4.08053	4.2786e-09	-0.568348	3.30785	0.117728	0.612763
Solyc01g096800	SL3.0ch01	87669226	87671226	+	5489	8136	5912	9588	40.286	38.142	-2.1443	0.000163137	0.394626	4.58467	0.249458	0.889414
Solyc01g096810	SL3.0ch01	87680703	87682703	-	1469	8652	1143	9709	14.514	10.533	-3.98176	1.28472e-17	0.018911	7.23539	0.94865	1
Solyc01g096820	SL3.0ch01	87690376	87692376	+	3747	8717	3511	9402	30.063	27.19	-2.87293	5.54794e-07	6.27795	-2.35587	0.00551458	0.084257
Solyc01g096830	SL3.0ch01	87713156	87715156	-	4109	6752	4083	8238	37.833	33.139	-4.69407	2.77416e-13	-0.261511	5.28684	0.581484	1
Solyc01g096930	SL3.0ch01	87805413	87807413	+	2164	8584	1782	7846	20.134	18.509	-1.62546	0.00231094	0.953574	3.73179	0.0338188	0.295185
Solyc01g096980	SL3.0ch01	87846986	87848986	-	1395	995	1287	1293	58.368	49.884	-8.48448	3.91434e-09	0.255705	-3.1045	1	1
Solyc01g096990	SL3.0ch01	87845146	87847146	+	8526	7548	8954	9438	53.042	48.684	-4.35797	2.64698e-15	-0.242023	5.24475	0.380942	1
Solyc01g097000	SL3.0ch01	87852583	87854583	+	4077	3730	5456	5451	52.222	50.023	-2.19944	0.00207657	1.59754	3.63092	0.00717538	0.101242
Solyc01g097040	SL3.0ch01	87887591	87889591	+	4670	9649	5070	11513	32.614	30.573	-2.04053	0.000106976	0.186273	3.94158	0.635383	1
Solyc01g097050	SL3.0ch01	87901919	87903919	-	1316	6541	504	3572	16.749	12.365	-4.38433	3.28087e-10	-5.12548e-15	-3.87342	1	1
Solyc01g097060	SL3.0ch01	87901919	87903919	-	1316	6541	504	3572	16.749	12.365	-4.38433	3.28087e-10	1.58756	-2.89834	0.383027	1
Solyc01g097110	SL3.0ch01	87950390	87952390	-	12438	7658	14617	9499	61.893	60.611	-1.2817	0.00382521	-1.06957	0.614849	0.319181	0.995711
Solyc01g097210	SL3.0ch01	88012755	88014755	+	3997	4420	4502	6033	47.487	42.734	-4.75348	1.45075e-10	-0.222616	-2.42174	0.860043	1
Solyc01g097250	SL3.0ch01	88047550	88049550	-	145	1767	79	1327	7.584	5.619	-1.96491	0.0166937	-0.03172	4.52354	0.917102	1
Solyc01g097270	SL3.0ch01	88056392	88058392	-	5190	9507	5241	10942	35.313	32.386	-2.92749	8.6953e-08	6.10614	4.73264	3.83944e-08	7.13324e-06
Solyc01g097290	SL3.0ch01	88069878	88071878	+	3701	9493	3530	10485	28.051	25.187	-2.86333	1.32106e-07	1.82224	4.8105	0.00649486	0.0941281
Solyc01g097300	SL3.0ch01	88074241	88076241	+	1181	1817	1018	3019	39.393	25.217	-14.1762	2.32382e-35	0.00233463	5.58649	0.99487	1
Solyc01g097320	SL3.0ch01	88098304	88100304	-	7140	7516	7682	8520	48.717	47.414	-1.30335	0.0129466	-0.739508	4.59887	0.0212243	0.218524
Solyc01g097390	SL3.0ch01	88140785	88142785	+	7636	7338	7735	7877	50.995	49.545	-1.44984	0.00702284	2.71223	1.88685	0.0110758	0.139053
Solyc01g097420	SL3.0ch01	88154645	88156645	-	1884	5584	1368	4658	25.228	22.702	-2.52601	0.000518761	-3.29885	-2.98475	0.14612	0.687869
Solyc01g097450	SL3.0ch01	88178738	88180738	+	82	544	46	601	13.099	7.11	-5.9893	0.000310517	0.407978	7.07468	0.148705	0.694915
Solyc01g097460	SL3.0ch01	88186033	88188033	+	8	112	0	79	6.667	0	-6.66667	0.0131826	-0.0943991	5.91851	0.757394	1
Solyc01g097510	SL3.0ch01	88214492	88216492	-	1228	8038	1406	11415	13.253	10.966	-2.28637	3.76997e-07	0.865641	4.7262	0.0526905	0.390363
Solyc01g097520	SL3.0ch01	88217534	88219534	+	1586	11223	1799	14036	12.382	11.361	-1.02101	0.00507112	0.840642	6.01066	0.053268	0.39299
Solyc01g097580	SL3.0ch01	88244885	88246885	+	2261	8361	1519	6680	21.286	18.527	-2.75936	3.31987e-06	-5.12548e-15	-3.91086	1	1
Solyc01g097640	SL3.0ch01	88281044	88283044	+	5939	8072	6676	9605	42.388	41.005	-1.38327	0.00898714	-0.441281	4.86987	0.235986	0.865098
Solyc01g097650	SL3.0ch01	88296417	88298417	+	17	15	0	33	53.125	0	-53.125	4.05314e-07	-0.607463	1.73435	0.253124	0.896472
Solyc01g097700	SL3.0ch01	88315518	88317518	+	6564	5818	6397	6148	53.012	50.992	-2.02001	0.0010639	1.80456	-3.72817	1	1
Solyc01g097735	SL3.0ch01	88329554	88331554	+	10	20	2	91	33.333	2.151	-31.1828	9.87983e-06	-0.853495	1.89049	0.0526916	0.390363
Solyc01g097750	SL3.0ch01	88346974	88348974	-	1099	5820	1115	6969	15.884	13.793	-2.09112	0.000279974	-5.12548e-15	-3.87428	1	1
Solyc01g097760	SL3.0ch01	88347790	88349790	+	3753	7618	3725	8165	33.005	31.329	-1.67616	0.00414891	0.106102	8.2956	0.722217	1
Solyc01g097780	SL3.0ch01	88370118	88372118	+	1961	5566	1941	6773	26.053	22.275	-3.77838	3.34107e-08	-5.12548e-15	-3.91086	1	1
Solyc01g097830	SL3.0ch01	88405173	88407173	-	1530	5647	1292	5325	21.318	19.525	-1.79263	0.00583446	-5.12548e-15	-3.91086	1	1
Solyc01g097840	SL3.0ch01	88416968	88418968	+	5629	8653	5483	9284	39.413	37.13	-2.28316	5.91305e-05	0.402407	4.02818	0.391987	1
Solyc01g097850	SL3.0ch01	88427817	88429817	+	1943	5294	2025	6856	26.848	22.801	-4.04666	5.6317e-09	1.51117	-3.71273	0.65801	1
Solyc01g097890	SL3.0ch01	88458316	88460316	-	6520	8736	6647	9591	42.737	40.935	-1.80244	0.000899551	-0.345518	4.24557	0.284453	0.947749
Solyc01g097930	SL3.0ch01	88479333	88481333	+	2751	6923	2231	6614	28.437	25.223	-3.21376	1.04817e-06	-2.74788	-3.41812	0.296967	0.965544
Solyc01g097950	SL3.0ch01	88485563	88487563	+	1648	6737	1399	8242	19.654	14.511	-5.1432	2.3869e-19	1.4843	1.82786	0.0977604	0.554327
Solyc01g097980	SL3.0ch01	88499346	88501346	+	3748	5541	3928	6956	40.349	36.09	-4.25913	1.10859e-09	-0.133732	5.86081	0.632695	1
Solyc01g097990	SL3.0ch01	88512555	88514555	-	99	642	120	1032	13.36	10.417	-2.94366	0.0292018	-1.20708	1.36296	0.17021	0.741996
Solyc01g098000	SL3.0ch01	88511418	88513418	+	99	642	121	1071	13.36	10.151	-3.20932	0.0182045	-5.12548e-15	-3.47118	1	1
Solyc01g098040	SL3.0ch01	88526341	88528341	-	626	7482	479	7372	7.721	6.101	-1.61964	5.27662e-05	0.2202	-1.5455	0.878707	1
Solyc01g098150	SL3.0ch01	88605324	88607324	-	357	915	146	463	28.066	23.974	-4.09231	0.0341489	-0.0136668	3.05621	0.982974	1
Solyc01g098170	SL3.0ch01	88617825	88619825	+	2182	10070	1999	10103	17.809	16.518	-1.29141	0.00483886	0.0102396	5.41241	0.972392	1
Solyc01g098190	SL3.0ch01	88654518	88656518	+	6003	7582	5974	7873	44.188	43.143	-1.04552	0.0412823	0.184629	6.90109	0.657488	1
Solyc01g098210	SL3.0ch01	88677949	88679949	-	6635	6832	7237	7963	49.269	47.612	-1.65674	0.0034168	-0.0822287	4.79678	0.791458	1
Solyc01g098230	SL3.0ch01	88679181	88681181	+	5142	4284	5898	5221	54.551	53.044	-1.5069	0.0176755	0.20543	4.70156	0.513084	1
Solyc01g098270	SL3.0ch01	88725757	88727757	+	824	4740	682	4490	14.809	13.186	-1.6231	0.00926421	-5.12548e-15	-3.91086	1	1
Solyc01g098300	SL3.0ch01	88744687	88746687	+	1751	6197	1282	5370	22.031	19.272	-2.7583	4.00169e-05	-5.12548e-15	-3.91086	1	1
Solyc01g098310	SL3.0ch01	88750212	88752212	+	2646	5902	2842	7472	30.955	27.555	-3.39983	4.40264e-07	-5.12548e-15	-3.87428	1	1
Solyc01g098330	SL3.0ch01	88758651	88760651	+	149	1057	82	1140	12.355	6.71	-5.64458	2.63191e-06	-5.12548e-15	-3.91086	1	1
Solyc01g098340	SL3.0ch01	88761075	88763075	+	426	1316	488	1984	24.455	19.741	-4.71355	0.000253241	-0.495344	1.28675	0.531119	1
Solyc01g098360	SL3.0ch01	88774789	88776789	-	173	316	64	160	35.378	28.571	-6.80689	0.0435118	-5.12548e-15	-3.76338	1	1
Solyc01g098390	SL3.0ch01	88790146	88792146	+	5256	6193	5662	7032	45.908	44.604	-1.30419	0.0227687	0.544072	3.22722	0.21397	0.827342
Solyc01g098400	SL3.0ch01	88799257	88801257	-	7669	8128	9229	10320	48.547	47.21	-1.33762	0.00763958	-2.49931	4.29378	6.08786e-05	0.00272529
Solyc01g098450	SL3.0ch01	88843989	88845989	+	3282	6787	2483	6770	32.595	26.835	-5.76055	1.08971e-17	-0.554269	3.18526	0.29159	0.958461
Solyc01g098560	SL3.0ch01	88922659	88924659	+	670	7586	628	8269	8.115	7.059	-1.05675	0.00580057	-0.174011	4.25184	0.664315	1
Solyc01g098600	SL3.0ch01	88948935	88950935	+	1275	5341	730	5976	19.271	10.886	-8.38569	8.65302e-41	-5.12548e-15	-3.91086	1	1
Solyc01g098645	SL3.0ch01	88975814	88977814	-	319	1225	255	1832	20.661	12.218	-8.44213	1.90633e-11	1.26517	3.66424	0.0126688	0.152583
Solyc01g098660	SL3.0ch01	88975013	88977013	+	406	2287	303	2292	15.076	11.676	-3.39982	0.000263981	-5.12548e-15	-3.91086	1	1
Solyc01g098760	SL3.0ch01	89057097	89059097	+	6638	2732	6954	3030	70.843	69.651	-1.19167	0.0361768	1.39969	6.33998	1.04081e-05	0.000675638
Solyc01g098750	SL3.0ch01	89058282	89060282	+	6754	5713	7019	6435	54.175	52.17	-2.00466	0.000924415	-0.00431624	3.57542	0.99511	1
Solyc01g098780	SL3.0ch01	89089483	89091483	-	1029	5405	758	5965	15.993	11.275	-4.71843	1.12267e-14	0.549716	6.33176	0.0531156	0.392447
Solyc01g098790	SL3.0ch01	89088125	89090125	+	915	3409	648	3607	21.161	15.229	-5.93182	2.91615e-12	1.16462	3.5246	0.0617472	0.428648
Solyc01g098813	SL3.0ch01	89104253	89106253	-	3524	2185	5459	3775	61.727	59.118	-2.60862	0.00112998	-5.12548e-15	-2.26042	1	1
Solyc01g098817	SL3.0ch01	89106703	89108703	-	1512	1794	2053	2745	45.735	42.789	-2.94637	0.0055382	-5.12548e-15	-3.73043	1	1
Solyc01g098820	SL3.0ch01	89103756	89105756	+	3450	1591	5328	2771	68.439	65.786	-2.6529	0.00120604	-1.74626	0.33091	0.223697	0.846034
Solyc01g098940	SL3.0ch01	89185943	89187943	-	5602	8576	5701	9280	39.512	38.055	-1.45705	0.00664663	3.42468	-3.18062	0.352071	1
Solyc01g098950	SL3.0ch01	89186227	89188227	+	3745	8103	3403	9419	31.609	26.54	-5.06839	9.56999e-18	-0.316552	2.82001	0.478868	1
Solyc01g098970	SL3.0ch01	89198801	89200801	+	321	952	257	1067	25.216	19.411	-5.80515	0.000321607	-5.12548e-15	-3.91086	1	1
Solyc01g099010	SL3.0ch01	89233154	89235154	-	5670	8901	5328	8909	38.913	37.424	-1.48929	0.00587935	-5.12548e-15	-3.91086	1	1
Solyc01g099020	SL3.0ch01	89238710	89240710	-	7593	6713	7790	7989	53.076	49.369	-3.70622	2.83197e-10	-1.04817	-0.625812	0.520382	1
Solyc01g099090	SL3.0ch01	89288229	89290229	-	3384	10951	3364	14817	23.607	18.503	-5.10372	2.99316e-28	0.144419	6.92324	0.628394	1
Solyc01g099240	SL3.0ch01	89411870	89413870	+	12	28	13	127	30	9.286	-20.7143	0.00204494	-0.630748	3.96156	0.093126	0.539396
Solyc01g099405	SL3.0ch01	89554936	89556936	-	1442	4106	1841	5626	25.991	24.655	-1.3362	0.0418243	-5.12548e-15	-3.91086	1	1
Solyc01g099410	SL3.0ch01	89555629	89557629	-	6883	5827	8634	7723	54.154	52.785	-1.36947	0.0120654	-5.12548e-15	-3.91086	1	1
Solyc01g099430	SL3.0ch01	89568136	89570136	+	47	244	33	398	16.151	7.657	-8.49459	0.000350005	-0.718668	-0.82391	0.529566	1
Solyc01g099525	SL3.0ch01	89626668	89628668	-	84	733	18	388	10.282	4.433	-5.84802	0.00031704	0.327977	-2.44238	0.914229	1
Solyc01g099570	SL3.0ch01	89646568	89648568	-	4825	8220	5427	9864	36.987	35.491	-1.49589	0.00574277	-5.12548e-15	-3.82946	1	1
Solyc01g099600	SL3.0ch01	89669478	89671478	-	3408	8705	3235	10226	28.135	24.032	-4.10267	2.63922e-13	-0.887751	6.67831	0.0362334	0.308717
Solyc01g099645	SL3.0ch01	89704396	89706396	-	3168	11215	2996	11684	22.026	20.409	-1.61728	0.000600166	-0.511864	3.27943	0.199929	0.80228
Solyc01g099660	SL3.0ch01	89712792	89714792	+	3350	3009	3093	3173	52.681	49.362	-3.3196	0.000168352	-1.18766	3.2343	0.106636	0.581692
Solyc01g099670	SL3.0ch01	89722271	89724271	-	4995	5875	6044	7478	45.952	44.698	-1.25463	0.0269175	0.420742	7.05057	0.204237	0.809257
Solyc01g099675	SL3.0ch01	89719389	89721389	+	59	1684	15	841	3.385	1.752	-1.63263	0.0101693	-0.555292	-3.42502	0.867364	1
Solyc01g099680	SL3.0ch01	89724487	89726487	+	2280	6125	2412	7941	27.127	23.298	-3.82912	3.51221e-09	-0.00920548	9.29258	0.975577	1
Solyc01g099740	SL3.0ch01	89771148	89773148	+	8074	9862	9857	12846	45.016	43.417	-1.59844	0.000945623	0.0631065	6.04008	0.808909	1
Solyc01g099760	SL3.0ch01	89782869	89784869	+	5911	8600	7481	11698	40.735	39.006	-1.72841	0.000993299	-0.142177	7.84541	0.590803	1
Solyc01g099780	SL3.0ch01	89795797	89797797	+	4426	13161	4362	13658	25.166	24.206	-0.959879	0.0201261	0.0347656	7.48772	0.91342	1
Solyc01g099840	SL3.0ch01	89860093	89862093	+	1943	7182	1517	6376	21.293	19.22	-2.07359	0.000632814	0.283241	8.30811	0.475001	1
Solyc01g099850	SL3.0ch01	89863994	89865994	+	678	6169	533	7434	9.902	6.69	-3.21205	3.58595e-12	0.369478	-1.49145	0.677971	1
Solyc01g099865	SL3.0ch01	89879837	89881837	-	4168	9838	2898	9310	29.759	23.739	-6.02014	5.08297e-27	-5.12548e-15	-3.91086	1	1
Solyc01g099900	SL3.0ch01	89895573	89897573	+	42	682	26	941	5.801	2.689	-3.11238	0.00116705	0.260722	9.58093	0.371413	1
Solyc01g099910	SL3.0ch01	89910286	89912286	-	695	3795	642	4275	15.479	13.057	-2.4221	0.000634913	-0.515143	-1.86551	0.702094	1
Solyc01g099925	SL3.0ch01	89920626	89922626	+	737	3594	477	3463	17.017	12.107	-4.91026	5.16556e-10	0.481863	0.434476	0.473357	1
Solyc01g099940	SL3.0ch01	89926387	89928387	-	1768	2288	1858	2970	43.59	38.484	-5.1059	1.47699e-06	1.31095	-1.60053	0.277904	0.937478
Solyc01g099980	SL3.0ch01	89950506	89952506	-	1948	7175	2004	8719	21.353	18.689	-2.66383	3.42082e-06	-0.306923	4.85721	0.375587	1
Solyc01g099990	SL3.0ch01	89959307	89961307	-	1694	7524	1854	9471	18.377	16.371	-2.00623	0.000141962	-0.42759	2.4248	0.446063	1
Solyc01g100010	SL3.0ch01	89968203	89970203	-	4056	7162	3687	8418	36.156	30.458	-5.69769	1.49913e-19	2.49521	5.17101	7.82421e-08	1.29948e-05
Solyc01g100060	SL3.0ch01	90036337	90038337	+	55	1902	13	1150	2.81	1.118	-1.69263	0.0010218	-0.537726	5.2648	0.0827883	0.506616
Solyc07g021735	SL3.0ch01	90068603	90070603	-	4589	7385	5084	10820	38.325	31.967	-6.3579	3.41573e-27	-5.12548e-15	-3.79271	1	1
Solyc01g100120	SL3.0ch01	90095959	90097959	-	2872	5536	3269	7597	34.158	30.085	-4.07328	3.52086e-09	1.81312	-3.33864	1	1
Solyc01g100140	SL3.0ch01	90109257	90111257	-	131	1134	11	175	10.356	5.914	-4.44175	0.0329288	-0.0805817	3.38531	0.825214	1
Solyc01g100160	SL3.0ch01	90111594	90113594	-	1322	6311	1343	7032	17.32	16.036	-1.28371	0.0169464	-0.360112	4.86614	0.248538	0.887912
Solyc01g100170	SL3.0ch01	90110834	90112834	+	1314	5855	1328	6418	18.329	17.144	-1.18458	0.0308011	-0.0683552	5.16216	0.801069	1
Solyc01g100190	SL3.0ch01	90123998	90125998	+	3459	8778	3333	8910	28.267	27.224	-1.04301	0.0358818	-0.0458428	4.37543	0.881672	1
Solyc01g100240	SL3.0ch01	90193341	90195341	-	2995	9743	3515	12565	23.512	21.859	-1.65287	0.000683399	0.570233	5.12891	0.157496	0.714038
Solyc01g100320	SL3.0ch01	90270080	90272080	-	7626	8171	8648	10117	48.275	46.086	-2.18919	4.68416e-05	0.092545	9.27269	0.768599	1
Solyc01g100330	SL3.0ch01	90270215	90272215	+	8280	8303	9386	9983	49.931	48.459	-1.47177	0.00363257	-0.0835975	4.75314	0.751948	1
Solyc01g100340	SL3.0ch01	90285171	90287171	+	4510	5949	4847	7256	43.121	40.048	-3.07284	3.61001e-06	-0.592673	1.09049	0.343314	1
Solyc01g100360	SL3.0ch01	90301497	90303497	-	2774	6215	2874	6819	30.86	29.65	-1.20968	0.0378662	0.337634	6.60051	0.275615	0.9339
Solyc01g100370	SL3.0ch01	90300668	90302668	+	2787	6610	2906	7848	29.658	27.023	-2.6359	3.35128e-05	0.505203	8.70088	0.107742	0.585225
Solyc01g100410	SL3.0ch01	90319772	90321772	+	958	4035	1041	5064	19.187	17.052	-2.13526	0.00248636	0.0771613	4.0128	0.815073	1
Solyc01g100430	SL3.0ch01	90335989	90337989	-	1315	5782	936	6832	18.529	12.049	-6.47952	3.65425e-27	-5.12548e-15	-3.91086	1	1
Solyc01g100490	SL3.0ch01	90376789	90378789	+	1996	7142	1694	7554	21.843	18.317	-3.52538	4.27958e-09	1.71783	-0.306839	0.0412537	0.335203
Solyc01g100520	SL3.0ch01	90409032	90411032	-	2977	8622	2902	9373	25.666	23.642	-2.02446	0.000240848	0.154376	7.96639	0.606501	1
Solyc01g100570	SL3.0ch01	90440585	90442585	-	5839	8697	6353	9932	40.169	39.011	-1.15787	0.0212172	-0.147586	7.95773	0.580211	1
Solyc01g100590	SL3.0ch01	90453012	90455012	-	10325	8261	11499	9703	55.553	54.235	-1.31712	0.00543827	0.698901	5.8915	0.0374076	0.314748
Solyc01g100610	SL3.0ch01	90474868	90476868	-	3577	11667	3543	13143	23.465	21.233	-2.2316	2.11486e-06	-0.61286	5.06019	0.0450155	0.354261
Solyc01g100620	SL3.0ch01	90474801	90476801	+	3582	12154	3545	13606	22.763	20.669	-2.09374	4.85127e-06	1.83378	-1.23062	1	1
Solyc01g100630	SL3.0ch01	90479529	90481529	+	520	1273	429	2027	29.002	17.467	-11.5342	4.61765e-18	-0.949436	3.57972	0.0649943	0.442214
Solyc01g100650	SL3.0ch01	90493588	90495588	+	397	2834	242	2415	12.287	9.108	-3.1792	8.05346e-05	-0.286504	5.99085	0.319263	0.995711
Solyc01g100690	SL3.0ch01	90536324	90538324	+	2881	8946	2626	8837	24.36	22.908	-1.45103	0.00594634	-1.49662	5.67272	0.000545808	0.0150986
Solyc01g100700	SL3.0ch01	90545827	90547827	-	7572	6210	9872	9598	54.941	50.704	-4.23758	7.74516e-14	-0.16787	4.62079	0.578311	1
Solyc01g100770	SL3.0ch01	90592583	90594583	+	3505	5185	3374	5655	40.334	37.368	-2.96524	4.99939e-05	1.8652	4.62993	0.00444076	0.0722973
Solyc01g100800	SL3.0ch01	90614869	90616869	-	15	189	3	160	7.353	1.84	-5.51245	0.0091295	-0.443306	1.6391	0.366419	1
Solyc01g100890	SL3.0ch01	90659788	90661788	+	11922	8895	12646	10097	57.271	55.604	-1.66658	0.000368823	-5.12548e-15	-1.59083	1	1
Solyc01g100910	SL3.0ch01	90682935	90684935	+	5785	9575	6016	10714	37.663	35.959	-1.70341	0.00117122	-2.03941	-2.09732	0.237402	0.867256
Solyc01g100940	SL3.0ch01	90709628	90711628	-	3432	10363	3659	11932	24.879	23.469	-1.40991	0.00323245	1.98166	-0.000685358	0.0293326	0.269194
Solyc01g101020	SL3.0ch01	90760985	90762985	+	5734	8266	6824	11121	40.957	38.027	-2.92984	1.54965e-07	-0.404805	6.3942	0.181679	0.767476
Solyc01g101030	SL3.0ch01	90772599	90774599	-	98	2918	49	3257	3.249	1.482	-1.76718	3.92765e-06	-0.752216	1.87116	0.197568	0.798397
Solyc01g101035	SL3.0ch01	90775837	90777837	-	3697	6552	4523	8790	36.072	33.974	-2.0975	0.000645385	-5.12548e-15	-3.41566	1	1
Solyc01g101050	SL3.0ch01	90784800	90786800	+	4739	9267	4400	9209	33.835	32.332	-1.50395	0.00511498	7.15979	-2.41046	0.00302048	0.0546112
Solyc01g101070	SL3.0ch01	90809706	90811706	-	2045	9190	1817	8920	18.202	16.923	-1.27926	0.00789676	-0.0319468	4.84535	0.926929	1
Solyc01g101100	SL3.0ch01	90829283	90831283	-	2090	6924	1112	5650	23.186	16.445	-6.74132	9.05691e-25	1.05108	4.88191	0.00206414	0.0411311
Solyc01g101130	SL3.0ch01	90855999	90857999	-	6043	8479	6615	9808	41.613	40.279	-1.33385	0.0103318	1.75602	3.19282	0.00332661	0.0583552
Solyc01g101140	SL3.0ch01	90863084	90865084	+	1322	8148	1016	7740	13.96	11.603	-2.3564	2.4504e-06	-0.0396838	7.0594	0.900007	1
Solyc01g101170	SL3.0ch01	90887986	90889986	-	4510	8950	4869	10566	33.507	31.545	-1.9615	0.000323333	12.4749	2.29738	2.01576e-06	0.000181611
Solyc01g101220	SL3.0ch01	90914712	90916712	+	5535	5172	6285	6525	51.695	49.063	-2.63192	5.40485e-05	-1.40679	-3.49034	0.683448	1
Solyc01g101250	SL3.0ch01	90944170	90946170	-	2916	6417	2735	6714	31.244	28.945	-2.29911	0.000485346	-0.114031	5.70486	0.664206	1
Solyc01g102340	SL3.0ch01	91039662	91041662	+	382	6444	216	6712	5.596	3.118	-2.47847	2.29815e-12	1.18292	4.67368	0.00970358	0.12644
Solyc01g102360	SL3.0ch01	91073903	91075903	-	1680	8728	1571	9196	16.141	14.591	-1.55055	0.00126831	-5.12548e-15	-3.65227	1	1
Solyc01g102380	SL3.0ch01	91087753	91089753	+	2480	4239	2348	5624	36.91	29.453	-7.45717	7.08608e-21	-5.12548e-15	-3.91086	1	1
Solyc01g102390	SL3.0ch01	91091598	91093598	+	3012	6455	2766	6618	31.816	29.476	-2.34008	0.000402625	2.72014	3.20024	0.00131124	0.0289824
Solyc01g102430	SL3.0ch01	91121715	91123715	-	524	3888	443	3945	11.877	10.096	-1.78098	0.00495596	-5.12548e-15	-3.91086	1	1
Solyc01g102460	SL3.0ch01	91138368	91140368	-	2101	8371	1827	7748	20.063	19.081	-0.982085	0.0409149	0.418319	3.07752	0.257046	0.903311
Solyc01g102590	SL3.0ch01	91241941	91243941	-	44	161	1	39	21.463	2.5	-18.9634	0.00203397	-0.37891	0.661475	0.530741	1
Solyc01g102610	SL3.0ch01	91253358	91255358	-	10140	9791	12403	12447	50.876	49.911	-0.964052	0.0231371	0.594423	3.92796	0.164627	0.729265
Solyc01g102660	SL3.0ch01	91280440	91282440	+	6921	11772	7148	13411	37.025	34.768	-2.25633	3.84801e-06	0.401352	7.80102	0.166734	0.733998
Solyc01g102685	SL3.0ch01	91297665	91299665	+	88	1118	28	562	7.297	4.746	-2.55109	0.0221941	-1.28537	-2.77168	0.492526	1
Solyc01g102700	SL3.0ch01	91307947	91309947	+	10679	6470	13784	8870	62.272	60.846	-1.42609	0.00258686	2.93201	2.53962	1.84658e-05	0.00107222
Solyc01g102705	SL3.0ch01	91316650	91318650	+	357	3051	79	1437	10.475	5.211	-5.26427	8.84605e-10	-5.12548e-15	-3.48477	1	1
Solyc02g024060	SL3.0ch01	91318126	91320126	+	1276	4328	1110	4642	22.769	19.298	-3.47181	6.22459e-06	4.05519	0.0819187	0.0773254	0.488585
Solyc01g102740	SL3.0ch01	91350835	91352835	+	2271	5104	1475	4937	30.793	23.004	-7.78948	6.72367e-24	-2.01392	-3.26532	1	1
Solyc01g102760	SL3.0ch01	91366118	91368118	+	273	2912	312	3992	8.571	7.249	-1.32236	0.0200955	-0.242745	5.57604	0.348029	1
Solyc01g102770	SL3.0ch01	91372849	91374849	-	112	1304	90	1531	7.91	5.552	-2.35748	0.00648455	-1.19819	-0.57236	0.0687816	0.45728
Solyc01g102840	SL3.0ch01	91406050	91408050	+	140	1184	45	990	10.574	4.348	-6.22619	1.96008e-08	2.01159	6.72908	0.00109796	0.0253367
Solyc01g102850	SL3.0ch01	91413131	91415131	+	1189	3878	631	3054	23.466	17.123	-6.34209	1.03951e-12	-5.12548e-15	-3.53668	1	1
Solyc01g102860	SL3.0ch01	91417798	91419798	+	865	1364	1006	2029	38.807	33.147	-5.66002	2.36654e-05	-5.12548e-15	-3.56281	1	1
Solyc01g102890	SL3.0ch01	91444225	91446225	-	808	6478	723	7418	11.09	8.881	-2.20879	5.64267e-06	-5.12548e-15	-3.91086	1	1
Solyc01g103070	SL3.0ch01	91619915	91621915	+	3255	8141	3528	9608	28.563	26.857	-1.70516	0.0020092	-5.12548e-15	-3.91086	1	1
Solyc01g103110	SL3.0ch01	91648465	91650465	+	395	948	344	1586	29.412	17.824	-11.5879	3.66643e-14	-0.413972	2.82561	0.308955	0.982754
Solyc01g103140	SL3.0ch01	91679822	91681822	-	3446	11711	3927	15068	22.735	20.674	-2.06151	4.90349e-06	0.388274	7.54052	0.260135	0.90811
Solyc01g103200	SL3.0ch01	91735184	91737184	+	2830	6339	2821	7749	30.865	26.689	-4.17613	2.23554e-10	1.25707	6.00581	5.88622e-05	0.00265496
Solyc01g103415	SL3.0ch01	91901034	91903034	-	5794	8801	6084	9740	39.699	38.448	-1.2506	0.014868	-5.12548e-15	-3.91086	1	1
Solyc01g103420	SL3.0ch01	91902558	91904558	+	3604	10923	4193	13825	24.809	23.271	-1.5378	0.000923488	-0.310264	6.38133	0.269514	0.924716
Solyc01g103480	SL3.0ch01	91959744	91961744	-	6360	10319	6083	10420	38.132	36.86	-1.27182	0.0098873	0.0597051	7.64424	0.821491	1
Solyc01g103500	SL3.0ch01	91973854	91975854	-	1279	6087	1315	6864	17.364	16.078	-1.2858	0.0183045	2.89488	1.04185	0.00690578	0.0986051
Solyc01g103540	SL3.0ch01	92003609	92005609	+	1158	2668	1181	3290	30.267	26.415	-3.85192	9.73071e-05	-0.603796	10.2141	0.0271061	0.25717
Solyc01g103620	SL3.0ch01	92064991	92066991	-	1268	7161	1408	9740	15.043	12.63	-2.41323	1.62491e-06	0.269745	2.96923	0.481917	1
Solyc01g103630	SL3.0ch01	92067203	92069203	-	919	4360	1078	6275	17.409	14.661	-2.74792	3.15809e-05	-5.12548e-15	-3.44206	1	1
Solyc01g103650	SL3.0ch01	92074382	92076382	+	183	5263	145	5237	3.36	2.694	-0.666099	0.0235483	3.76919	4.46544	0.00162981	0.034617
Solyc01g103695	SL3.0ch01	92140266	92142266	-	8527	9207	10127	12415	48.083	44.925	-3.15775	5.9446e-10	-0.00150992	2.65477	1	1
Solyc01g103700	SL3.0ch01	92140266	92142266	-	8527	9207	10127	12415	48.083	44.925	-3.15775	5.9446e-10	-0.36039	3.43906	0.417177	1
Solyc01g103760	SL3.0ch01	92166156	92168156	+	1798	8674	1684	9056	17.17	15.68	-1.48989	0.00244354	0.347276	4.47451	0.30279	0.972625
Solyc01g103770	SL3.0ch01	92176234	92178234	-	6216	5072	6335	6202	55.067	50.53	-4.5369	6.32392e-12	-0.0793301	0.804462	0.900324	1
Solyc01g103785	SL3.0ch01	92194788	92196788	+	4872	5526	5150	6132	46.855	45.648	-1.20723	0.0388572	1.44021	2.51632	0.00312846	0.0557086
Solyc01g103790	SL3.0ch01	92195029	92197029	+	2923	4918	2975	5714	37.278	34.239	-3.03972	4.53668e-05	0.618904	-0.386678	0.620634	1
Solyc01g103810	SL3.0ch01	92222909	92224909	-	3083	6421	3158	7298	32.439	30.203	-2.23622	0.000532709	-5.12548e-15	-3.91086	1	1
Solyc01g103820	SL3.0ch01	92227451	92229451	-	2860	6652	2443	6033	30.067	28.823	-1.24473	0.0355065	-5.12548e-15	-3.91086	1	1
Solyc01g103850	SL3.0ch01	92241986	92243986	+	5219	11143	5818	13711	31.897	29.792	-2.10549	1.77672e-05	-0.00523414	4.79592	0.986602	1
Solyc01g103864	SL3.0ch01	92270640	92272640	-	3571	2742	3773	3123	56.566	54.713	-1.85294	0.0180744	-5.12548e-15	-3.91086	1	1
Solyc01g103910	SL3.0ch01	92298273	92300273	-	134	1444	32	733	8.492	4.183	-4.30876	8.9698e-05	-5.12548e-15	-3.69072	1	1
Solyc01g103930	SL3.0ch01	92308665	92310665	-	3542	9338	3618	10276	27.5	26.04	-1.45998	0.00450479	-0.050005	5.86691	0.865454	1
Solyc01g103940	SL3.0ch01	92309553	92311553	+	4035	9684	3973	11531	29.412	25.626	-3.78612	1.33639e-12	0.3861	7.29694	0.162428	0.723909
Solyc01g103950	SL3.0ch01	92326721	92328721	-	1845	14321	2035	18357	11.413	9.979	-1.43344	1.08394e-05	0.467616	4.59632	0.122853	0.626748
Solyc01g103980	SL3.0ch01	92346884	92348884	+	494	1699	395	1762	22.526	18.312	-4.21375	0.000480711	-5.12548e-15	-3.91086	1	1
Solyc01g104010	SL3.0ch01	92378938	92380938	-	541	4680	438	4488	10.362	8.892	-1.4704	0.00774638	-2.63014	-1.77684	0.0661571	0.447486
Solyc01g104015	SL3.0ch01	92382830	92384830	+	1239	2874	1130	2859	30.124	28.328	-1.7961	0.0398816	0.816611	4.8019	0.0299763	0.272753
Solyc01g104040	SL3.0ch01	92420530	92422530	-	6470	9662	7224	11933	40.107	37.709	-2.39717	4.87899e-06	0.0212531	5.87937	0.948251	1
Solyc01g104055	SL3.0ch01	92431893	92433893	-	6969	8014	7145	9246	46.513	43.591	-2.92172	2.84552e-07	-5.12548e-15	-3.19909	1	1
Solyc01g104090	SL3.0ch01	92455179	92457179	-	163	190	28	84	46.176	25	-21.1756	6.10626e-05	-1.455	0.065107	0.0724191	0.471164
Solyc01g104100	SL3.0ch01	92457411	92459411	-	8463	9790	8513	12038	46.365	41.424	-4.94121	8.08759e-22	-1.34356	-3.17191	0.386284	1
Solyc01g104110	SL3.0ch01	92471661	92473661	-	5121	4525	5314	5657	53.089	48.437	-4.65258	6.22296e-11	-0.84209	2.00026	0.251742	0.893904
Solyc01g104170	SL3.0ch01	92531770	92533770	-	441	4123	303	3761	9.663	7.456	-2.20687	0.000217009	0.0682965	8.82337	0.789765	1
Solyc01g104210	SL3.0ch01	92557349	92559349	+	5648	10876	5199	11443	34.181	31.24	-2.94035	1.92904e-08	2.16809	0.893746	0.029471	0.269734
Solyc01g104310	SL3.0ch01	92624015	92626015	-	6699	6807	6183	6912	49.6	47.216	-2.38368	9.39103e-05	-0.534863	5.515	0.0509361	0.382106
Solyc01g104370	SL3.0ch01	92659971	92661971	-	4594	7152	4118	6798	39.111	37.724	-1.38675	0.0183394	0.523255	7.78733	0.167137	0.734957
Solyc01g104390	SL3.0ch01	92665427	92667427	+	894	9206	584	8842	8.851	6.196	-2.65586	5.41055e-12	-5.12548e-15	-3.91086	1	1
Solyc01g104438	SL3.0ch01	92773961	92775961	+	2114	5006	1938	5218	29.691	27.082	-2.60884	0.000435299	-1.11349	-1.24248	0.203368	0.807431
Solyc01g104446	SL3.0ch01	92792461	92794461	+	776	3924	697	4308	16.511	13.926	-2.58456	0.000323433	-5.12548e-15	-3.87342	1	1
Solyc01g104490	SL3.0ch01	92837969	92839969	+	5662	9099	4857	9070	38.358	34.875	-3.48313	1.79906e-09	1.10617	1.32965	0.162429	0.723909
Solyc01g104520	SL3.0ch01	92872749	92874749	+	5202	6739	5612	7990	43.564	41.259	-2.30555	0.000170146	4.18284	-2.15511	0.119165	0.616214
Solyc01g104550	SL3.0ch01	92910230	92912230	+	3175	3739	3135	4160	45.921	42.975	-2.94668	0.000333785	-4.292	-3.59583	0.261603	0.910482
Solyc01g104590	SL3.0ch01	92939455	92941455	-	6919	7976	6259	7510	46.452	45.457	-0.994643	0.0459807	0.20622	9.57732	0.48235	1
Solyc01g104600	SL3.0ch01	92940772	92942772	+	4466	9309	3387	8137	32.421	29.391	-3.03022	2.94437e-07	-0.30468	4.64918	0.318275	0.9952
Solyc01g104610	SL3.0ch01	92950574	92952574	-	193	2002	159	2136	8.793	6.928	-1.86461	0.0130352	-3.57161	-3.69262	0.35309	1
Solyc01g104620	SL3.0ch01	92950456	92952456	+	210	2010	184	2274	9.459	7.486	-1.9737	0.00915774	-0.305918	3.51226	0.57177	1
Solyc01g104630	SL3.0ch01	92959489	92961489	-	7777	6874	9015	8376	53.082	51.837	-1.24454	0.0152602	-0.717294	3.32666	0.0494205	0.374428
Solyc01g104640	SL3.0ch01	92959756	92961756	+	7765	7062	8990	8576	52.371	51.178	-1.19226	0.0183525	-0.0133862	5.03331	0.966993	1
Solyc01g104670	SL3.0ch01	92989308	92991308	-	7233	11343	7614	12514	38.937	37.828	-1.10944	0.0143379	0.224938	6.96637	0.419647	1
Solyc01g104725	SL3.0ch01	93018430	93020430	-	4813	4554	5379	5908	51.383	47.657	-3.72592	1.42831e-07	0.2375	3.49099	0.537881	1
Solyc01g104730	SL3.0ch01	93018226	93020226	-	4813	4554	5367	5575	51.383	49.05	-2.33298	0.000708394	-0.542672	4.52826	0.106122	0.580214
Solyc01g104750	SL3.0ch01	93023788	93025788	-	2334	1228	2702	2206	65.525	55.053	-10.472	1.67237e-21	-0.347574	1.15655	0.534125	1
Solyc01g104780	SL3.0ch01	93042867	93044867	-	2044	4766	1833	5155	30.015	26.231	-3.784	1.05262e-06	1.28726	1.03176	0.089591	0.527488
Solyc01g104795	SL3.0ch01	93050069	93052069	+	172	838	154	1194	17.03	11.424	-5.60537	9.81651e-05	-1.89588	-3.01912	0.488765	1
Solyc01g104890	SL3.0ch01	93102177	93104177	+	4377	9052	3666	8908	32.594	29.155	-3.43824	3.81756e-09	0.165658	3.62449	0.657241	1
Solyc01g104910	SL3.0ch01	93123953	93125953	-	5007	6244	5364	7125	44.503	42.95	-1.55292	0.00975522	-0.52016	7.81194	0.155053	0.708958
Solyc01g104935	SL3.0ch01	93155956	93157956	-	45	836	17	716	5.108	2.319	-2.7886	0.00266105	0.355888	-3.28835	1	1
Solyc01g105040	SL3.0ch01	93225871	93227871	-	212	750	151	1315	22.037	10.3	-11.7373	1.7996e-14	-0.311784	2.93667	0.42882	1
Solyc01g105050	SL3.0ch01	93225087	93227087	+	212	780	151	1315	21.371	10.3	-11.0708	2.11404e-13	0.951884	5.15975	0.0829874	0.507487
Solyc01g105090	SL3.0ch01	93253022	93255022	+	27	313	31	672	7.941	4.41	-3.5315	0.0166003	-0.963139	4.39755	0.0165163	0.182997
Solyc01g105120	SL3.0ch01	93282318	93284318	-	3871	10441	4123	13049	27.047	24.01	-3.03722	1.4637e-09	-0.565525	6.88472	0.128268	0.640139
Solyc01g105130	SL3.0ch01	93293504	93295504	+	6981	6981	6343	7453	50	45.977	-4.02291	4.65716e-11	0.687886	4.20772	0.0511482	0.382974
Solyc01g105165	SL3.0ch01	93342146	93344146	-	10842	8867	12785	11119	55.01	53.485	-1.52563	0.00108308	0.345306	5.17565	0.233439	0.861086
Solyc01g105230	SL3.0ch01	93357100	93359100	+	1299	3933	1017	4170	24.828	19.607	-5.22127	2.97432e-10	-0.000176486	6.03438	0.999776	1
Solyc01g105340	SL3.0ch01	93432019	93434019	+	7291	10477	6691	10376	41.034	39.204	-1.83013	0.000401334	-0.190435	9.15673	0.547155	1
Solyc01g105350	SL3.0ch01	93440896	93442896	+	3575	4900	3721	6112	42.183	37.842	-4.34093	4.01304e-09	-0.170388	1.42311	0.818461	1
Solyc01g105360	SL3.0ch01	93450762	93452762	-	1297	5719	1244	6240	18.486	16.622	-1.86419	0.00231374	-0.552786	1.72379	0.46016	1
Solyc01g105370	SL3.0ch01	93468164	93470164	-	3940	7154	3711	7572	35.515	32.89	-2.6245	3.50026e-05	0.364557	5.72335	0.648482	1
Solyc01g105410	SL3.0ch01	93480094	93482094	+	2752	5358	1827	4813	33.933	27.515	-6.41836	1.97545e-16	3.31224	7.95823	3.43218e-09	9.98066e-07
Solyc01g105430	SL3.0ch01	93497937	93499937	+	1899	8099	1915	8986	18.994	17.567	-1.4266	0.00503711	-0.111609	-0.637603	0.936322	1
Solyc01g105450	SL3.0ch01	93514791	93516791	-	1776	9944	1963	12050	15.154	14.008	-1.14516	0.00592013	4.31077	-1.94652	0.027512	0.259438
Solyc01g105490	SL3.0ch01	93528861	93530861	-	124	770	121	1290	13.87	8.575	-5.29477	6.72606e-05	0.67183	0.123924	0.336026	1
Solyc01g105470	SL3.0ch01	93532296	93534296	-	475	703	602	1300	40.323	31.651	-8.67169	1.41542e-06	-1.06948	-2.62571	0.684896	1
Solyc01g105550	SL3.0ch01	93581032	93583032	+	7939	8583	8298	9856	48.051	45.709	-2.34215	1.33093e-05	-5.12548e-15	-2.59742	1	1
Solyc01g105580	SL3.0ch01	93608446	93610446	-	3991	3690	4020	4170	51.959	49.084	-2.87513	0.000255095	-5.12548e-15	-3.91086	1	1
Solyc01g105590	SL3.0ch01	93614484	93616484	-	4272	9891	3909	10699	30.163	26.759	-3.40379	3.37339e-10	-5.12548e-15	-3.91086	1	1
Solyc01g105630	SL3.0ch01	93628448	93630448	+	3830	8423	3077	8696	31.258	26.136	-5.12158	8.24843e-18	10.8495	2.08236	6.79334e-09	1.76076e-06
Solyc01g105740	SL3.0ch01	93698297	93700297	-	472	2612	229	1868	15.305	10.92	-4.38444	5.73866e-06	-5.12548e-15	-3.91086	1	1
Solyc01g105750	SL3.0ch01	93701532	93703532	-	29	84	0	97	25.664	0	-25.6637	5.2169e-09	-5.12548e-15	-3.91086	1	1
Solyc01g105760	SL3.0ch01	93701842	93703842	-	29	84	0	97	25.664	0	-25.6637	5.2169e-09	-5.12548e-15	-3.91086	1	1
Solyc01g105790	SL3.0ch01	93729375	93731375	-	5791	7184	5600	7337	44.632	43.287	-1.34529	0.0165131	-5.12548e-15	-3.91086	1	1
Solyc01g105827	SL3.0ch01	93754093	93756093	+	254	2306	206	2543	9.922	7.494	-2.42824	0.0012685	3.07671	-3.28367	0.386111	1
Solyc01g105850	SL3.0ch01	93770705	93772705	+	5333	7907	5258	8293	40.279	38.802	-1.47789	0.00831983	-5.12548e-15	-3.91086	1	1
Solyc01g105870	SL3.0ch01	93782998	93784998	+	5343	9392	6089	11500	36.261	34.618	-1.64238	0.00150336	-5.12548e-15	-3.14782	1	1
Solyc01g105920	SL3.0ch01	93847593	93849593	+	9353	7740	8309	8647	54.718	49.003	-5.715	4.63679e-25	5.21186	-2.81249	0.0431842	0.345047
Solyc01g105930	SL3.0ch01	93851805	93853805	+	2637	5099	2013	4267	34.087	32.054	-2.03324	0.0070698	-5.12548e-15	-3.86883	1	1
Solyc01g105950	SL3.0ch01	93858638	93860638	+	3840	6011	3978	7831	38.981	33.686	-5.29464	2.57863e-15	-5.12548e-15	-3.65593	1	1
Solyc01g106000	SL3.0ch01	93889043	93891043	-	1512	3792	1765	5090	28.507	25.748	-2.75916	0.000557606	0.498701	4.89703	0.0766966	0.486225
Solyc01g106010	SL3.0ch01	93891901	93893901	-	6401	9724	7069	11824	39.696	37.416	-2.28015	1.33084e-05	-0.109204	4.74184	0.727827	1
Solyc01g106020	SL3.0ch01	93893036	93895036	+	3701	9559	3688	12320	27.911	23.038	-4.87253	9.25713e-21	0.493301	3.81135	0.174585	0.751362
Solyc01g106040	SL3.0ch01	93907673	93909673	+	2165	2694	2194	3970	44.556	35.594	-8.96272	8.58143e-21	-0.29398	2.73773	0.502049	1
Solyc01g106050	SL3.0ch01	93927865	93929865	-	9067	8834	9853	11258	50.651	46.672	-3.97845	1.68852e-14	0.0223233	3.42141	0.969027	1
Solyc01g106055	SL3.0ch01	93929430	93931430	+	6738	8671	5607	7966	43.728	41.31	-2.41774	3.32344e-05	0.308102	3.36491	0.376269	1
Solyc01g106090	SL3.0ch01	93972442	93974442	+	4520	9807	3585	9485	31.549	27.429	-4.1196	2.54426e-13	0.483348	5.02103	0.190141	0.783141
Solyc01g106105	SL3.0ch01	93980410	93982410	+	7169	7639	7295	9140	48.413	44.387	-4.02604	2.77148e-12	5.37977	-1.86086	0.0499806	0.377313
Solyc01g106130	SL3.0ch01	93986203	93988203	+	646	1832	397	1738	26.069	18.595	-7.47456	2.72294e-09	-5.12548e-15	-3.7962	1	1
Solyc01g106150	SL3.0ch01	93993484	93995484	-	3693	4121	4434	5452	47.261	44.851	-2.41002	0.00103969	-0.749986	-0.737716	0.344401	1
Solyc01g106195	SL3.0ch01	94036146	94038146	+	72	520	59	701	12.162	7.763	-4.399	0.00459303	0.386931	0.793328	0.497514	1
Solyc01g106280	SL3.0ch01	94121163	94123163	-	792	3119	639	3099	20.251	17.095	-3.15587	0.000344632	0.702463	8.92656	0.0461102	0.359867
Solyc01g106290	SL3.0ch01	94120325	94122325	+	766	1864	628	2329	29.125	21.238	-7.88773	2.63905e-11	2.60155	5.94597	4.73936e-09	1.32435e-06
Solyc01g106310	SL3.0ch01	94130351	94132351	-	4436	9834	4704	11263	31.086	29.461	-1.62543	0.00155678	-1.03929	3.83688	0.0190324	0.202935
Solyc01g106320	SL3.0ch01	94141307	94143307	-	3443	6309	3293	7015	35.306	31.946	-3.35952	6.49051e-07	0.250515	7.51524	0.331022	1
Solyc01g106330	SL3.0ch01	94150427	94152427	+	5929	6925	6328	8412	46.126	42.931	-3.19492	1.4775e-07	0.378392	4.34071	0.531841	1
Solyc01g106410	SL3.0ch01	94208911	94210911	-	5567	9038	6152	11640	38.117	34.577	-3.53975	9.80347e-11	-5.12548e-15	-3.91086	1	1
Solyc01g106420	SL3.0ch01	94209295	94211295	+	5663	10038	6289	13003	36.068	32.599	-3.46876	2.48299e-11	-0.161232	3.40985	0.64031	1
Solyc01g106460	SL3.0ch01	94241410	94243410	+	5300	9428	4266	8563	35.986	33.253	-2.73309	2.47484e-06	1.33199	-0.902776	0.395397	1
Solyc01g106470	SL3.0ch01	94250721	94252721	+	674	4714	462	4864	12.509	8.674	-3.83485	2.39465e-10	-0.412052	3.20384	0.43222	1
Solyc01g106635	SL3.0ch01	94326948	94328948	-	766	4070	462	3570	15.84	11.458	-4.3812	4.28844e-09	-5.12548e-15	-3.91086	1	1
Solyc01g106750	SL3.0ch01	94383025	94385025	+	463	4490	436	4806	9.348	8.317	-1.03043	0.0355893	0.0342666	-1.97535	1	1
Solyc01g106770	SL3.0ch01	94401819	94403819	+	4713	10178	5090	11937	31.65	29.894	-1.75629	0.000556042	-0.521675	6.43345	0.0889337	0.525782
Solyc01g106800	SL3.0ch01	94454405	94456405	-	372	2958	370	3852	11.171	8.764	-2.40755	0.000414318	0.2627	2.95108	0.547463	1
Solyc01g106830	SL3.0ch01	94469477	94471477	+	2544	8458	2993	10874	23.123	21.584	-1.53945	0.00263153	10.4857	0.873079	2.37435e-07	3.25527e-05
Solyc01g106840	SL3.0ch01	94474740	94476740	+	1265	2305	1063	2564	35.434	29.308	-6.12621	4.47905e-08	-1.61878	-2.55531	0.281917	0.944595
Solyc01g106930	SL3.0ch01	94524527	94526527	+	2606	3419	2415	3519	43.253	40.698	-2.55544	0.00320667	-5.12548e-15	-3.91086	1	1
Solyc01g106947	SL3.0ch01	94559487	94561487	-	6694	7523	6581	8512	47.084	43.603	-3.48148	4.09456e-09	-0.401738	1.22419	0.467282	1
Solyc01g106980	SL3.0ch01	94577515	94579515	-	2088	7978	1301	8643	20.743	13.083	-7.65983	3.40042e-46	-2.035	-3.66542	1	1
Solyc01g107000	SL3.0ch01	94587106	94589106	-	4808	5761	5204	6566	45.492	44.214	-1.27743	0.0292871	-5.12548e-15	-3.91086	1	1
Solyc01g107010	SL3.0ch01	94588269	94590269	+	12372	7568	13032	8478	62.046	60.586	-1.46036	0.00161984	0.262799	5.40865	0.386904	1
Solyc01g107100	SL3.0ch01	94625062	94627062	+	2920	4543	2627	4465	39.126	37.042	-2.08462	0.00615809	3.15067	3.89275	8.37708e-05	0.00345013
Solyc01g107130	SL3.0ch01	94638511	94640511	+	4227	3514	4739	5059	54.605	48.367	-6.23833	9.32525e-16	-0.295037	7.57145	0.30195	0.971722
Solyc01g107220	SL3.0ch01	94751992	94753992	-	57	613	55	1163	8.507	4.516	-3.99186	0.000547694	-5.12548e-15	-3.91086	1	1
Solyc01g107270	SL3.0ch01	94770765	94772765	-	317	4188	308	5087	7.037	5.709	-1.32764	0.00446984	0.56142	1.94644	0.289024	0.954839
Solyc01g107273	SL3.0ch01	94771024	94773024	-	355	5562	342	6532	6	4.975	-1.02439	0.00682354	-5.12548e-15	-2.88353	1	1
Solyc01g107350	SL3.0ch01	94812040	94814040	-	2434	9022	2351	9299	21.247	20.18	-1.06625	0.0246052	0.852672	3.53244	0.0608799	0.425037
Solyc01g107370	SL3.0ch01	94829520	94831520	+	75	1135	63	1428	6.198	4.225	-1.97299	0.0128301	0.690248	-3.12917	1	1
Solyc01g107390	SL3.0ch01	94845241	94847241	-	198	2096	109	1438	8.631	7.046	-1.58532	0.0399074	0.294333	5.91178	0.550135	1
Solyc01g107400	SL3.0ch01	94864795	94866795	-	6286	7834	6041	8006	44.518	43.006	-1.51279	0.00649081	1.92569	8.68083	0.000180972	0.00631512
Solyc01g107410	SL3.0ch01	94874064	94876064	+	11527	8290	13335	11012	58.167	54.771	-3.39662	2.22037e-12	-0.406681	5.19742	0.210288	0.820231
Solyc01g107470	SL3.0ch01	94904647	94906647	+	6608	6470	5974	6450	50.528	48.084	-2.44325	8.73898e-05	0.681322	3.36349	0.105102	0.577816
Solyc01g107490	SL3.0ch01	94915506	94917506	+	2415	5346	2626	7249	31.117	26.592	-4.52472	1.01643e-10	-5.12548e-15	-2.35108	1	1
Solyc01g107600	SL3.0ch01	94997150	94999150	-	1899	7366	1737	7746	20.496	18.317	-2.1795	0.000141265	0.213058	4.80422	0.481775	1
Solyc01g107640	SL3.0ch01	95018138	95020138	-	174	1992	156	2810	8.033	5.26	-2.77363	7.66565e-05	0.305595	6.66148	0.319883	0.996133
Solyc01g107700	SL3.0ch01	95048179	95050179	+	4056	3989	4136	4546	50.416	47.639	-2.77761	0.000284033	0.45817	6.38916	0.120414	0.619528
Solyc01g107740	SL3.0ch01	95082372	95084372	-	287	1367	297	2032	17.352	12.752	-4.59962	5.72404e-05	0.379343	6.81283	0.310689	0.984661
Solyc01g107780	SL3.0ch01	95099678	95101678	-	6635	6103	8270	8475	52.088	49.388	-2.70036	5.0696e-06	4.10012	3.1192	0.00848223	0.113843
Solyc01g107790	SL3.0ch01	95104313	95106313	+	7347	5858	7649	7022	55.638	52.137	-3.50115	8.50707e-09	1.85554	-3.7599	1	1
Solyc01g107800	SL3.0ch01	95113206	95115206	-	1415	7381	1488	9089	16.087	14.068	-2.0186	8.54365e-05	-1.2359	4.29875	0.00095215	0.0225989
Solyc01g107870	SL3.0ch01	95152886	95154886	+	4279	10602	3926	10581	28.755	27.063	-1.69199	0.000927055	0.204611	9.65053	0.474884	1
Solyc01g107930	SL3.0ch01	95202879	95204879	+	3390	11593	2810	11412	22.626	19.758	-2.86752	3.89024e-09	0.0413832	4.38777	0.892877	1
Solyc01g107933	SL3.0ch01	95202903	95204903	+	3384	11510	2811	11330	22.721	19.878	-2.84219	6.13614e-09	-5.12548e-15	-3.86962	1	1
Solyc01g107950	SL3.0ch01	95223046	95225046	+	5363	9754	4926	9407	35.477	34.368	-1.10837	0.0248158	-5.12548e-15	-3.63286	1	1
Solyc01g107990	SL3.0ch01	95274402	95276402	-	7585	8809	7228	9389	46.267	43.498	-2.7693	5.55856e-07	0.375544	4.06996	0.331131	1
Solyc01g108035	SL3.0ch01	95305220	95307220	+	4079	10375	4841	13057	28.221	27.048	-1.17285	0.0112529	0.338579	2.67521	0.501701	1
Solyc01g108040	SL3.0ch01	95310584	95312584	+	124	1643	73	2007	7.018	3.51	-3.50793	1.28642e-06	-1.4468	1.5612	0.0188186	0.201347
Solyc01g108050	SL3.0ch01	95323732	95325732	+	23	121	1	79	15.972	1.25	-14.7222	0.000198744	-0.412503	3.24698	0.275709	0.9339
Solyc01g108150	SL3.0ch01	95416387	95418387	-	6374	7337	6153	7557	46.488	44.88	-1.60857	0.00484936	-0.328985	6.57855	0.208625	0.817271
Solyc01g108160	SL3.0ch01	95416572	95418572	+	6368	8270	6140	8472	43.503	42.02	-1.48295	0.00658454	-0.598053	5.14543	0.047559	0.366299
Solyc01g108280	SL3.0ch01	95529891	95531891	-	11574	8183	11753	9397	58.582	55.57	-3.01203	1.50907e-09	-0.201145	6.21178	0.436909	1
Solyc01g108340	SL3.0ch01	95579584	95581584	+	11068	8349	12643	10270	57.002	55.178	-1.82331	0.000144343	0.0850509	4.96619	0.780866	1
Solyc01g108380	SL3.0ch01	95596294	95598294	-	8571	7139	9368	8526	54.558	52.353	-2.20486	5.13618e-05	-5.12548e-15	-3.91086	1	1
Solyc01g108390	SL3.0ch01	95600581	95602581	-	2693	5429	2948	7036	33.157	29.527	-3.62961	2.36413e-07	1.36161	0.246137	0.226522	0.849629
Solyc01g108440	SL3.0ch01	95665943	95667943	-	1831	9751	1781	10187	15.809	14.881	-0.927664	0.0259608	-0.323714	0.519277	0.756252	1
Solyc01g108480	SL3.0ch01	95691199	95693199	-	1807	3492	1645	4272	34.101	27.801	-6.29952	1.68912e-12	1.85334	-3.16467	1	1
Solyc01g108510	SL3.0ch01	95714052	95716052	-	8914	22698	8933	25581	28.198	25.882	-2.3159	5.06067e-11	0.616475	6.06112	0.074736	0.47949
Solyc01g108540	SL3.0ch01	95723302	95725302	+	6	242	1	368	2.419	0.271	-2.14835	0.0109994	-0.776033	3.55285	0.0458276	0.358522
Solyc01g108610	SL3.0ch01	95760277	95762277	+	1424	4359	1315	4412	24.624	22.961	-1.66249	0.0205717	1.85337	-2.14715	1	1
Solyc01g108630	SL3.0ch01	95770953	95772953	+	92	1362	79	1597	6.327	4.714	-1.61377	0.0260909	1.63058	-0.402016	0.244722	0.880252
Solyc01g108670	SL3.0ch01	95807333	95809333	-	3578	4533	3907	6245	44.113	38.485	-5.62791	5.19115e-14	-5.2093	-1.03653	0.0277323	0.260828
Solyc01g108710	SL3.0ch01	95842215	95844215	+	5601	7520	5895	9023	42.687	39.516	-3.17127	1.09039e-07	1.44164	-2.76502	0.333978	1
Solyc01g108770	SL3.0ch01	95857491	95859491	-	18	243	0	98	6.897	0	-6.89655	0.00318972	-5.12548e-15	-3.91086	1	1
Solyc01g108780	SL3.0ch01	95886813	95888813	-	7908	8541	9236	10950	48.076	45.754	-2.32139	1.04035e-05	-5.12548e-15	-2.15444	1	1
Solyc01g108800	SL3.0ch01	95893276	95895276	+	6866	7139	6955	8377	49.025	45.363	-3.66271	6.92704e-10	-4.28687	-3.2663	0.207847	0.816324
Solyc01g108850	SL3.0ch01	95922928	95924928	-	807	1894	651	2070	29.878	23.925	-5.9528	1.01401e-06	-5.12548e-15	-3.01313	1	1
Solyc01g108880	SL3.0ch01	95941759	95943759	-	37	564	1	309	6.156	0.323	-5.83383	4.66767e-06	-0.882356	6.71085	0.019171	0.203777
Solyc01g108935	SL3.0ch01	95977200	95979200	+	18	1139	1	579	1.556	0.172	-1.38333	0.00407342	-5.12548e-15	-3.21313	1	1
Solyc01g108950	SL3.0ch01	95986404	95988404	+	3684	8874	3743	9834	29.336	27.569	-1.7672	0.00115216	-5.12548e-15	-3.79471	1	1
Solyc01g109020	SL3.0ch01	96020568	96022568	-	1341	1956	1554	3184	40.673	32.799	-7.87469	1.53918e-12	-5.12548e-15	-3.83693	1	1
Solyc01g109030	SL3.0ch01	96019694	96021694	+	2187	3939	1703	3939	35.7	30.184	-5.51596	4.2327e-10	-5.12548e-15	-3.91086	1	1
Solyc01g109060	SL3.0ch01	96029384	96031384	-	1288	2170	1632	3078	37.247	34.65	-2.59728	0.00955483	-0.948313	1.93107	0.0712034	0.467276
Solyc01g109070	SL3.0ch01	96027800	96029800	+	1250	1192	1589	2421	51.188	39.626	-11.5616	6.78586e-19	0.700093	4.563	0.0622336	0.43035
Solyc01g109080	SL3.0ch01	96029322	96031322	+	1290	2251	1639	3454	36.43	32.181	-4.24896	4.09993e-05	-0.343465	4.50351	0.404919	1
Solyc01g109150	SL3.0ch01	96116671	96118671	+	4265	6098	4579	7252	41.156	38.703	-2.45263	0.000175308	-1.28371	-2.53314	0.409262	1
Solyc01g109170	SL3.0ch01	96127878	96129878	+	3894	2971	5497	4899	56.723	52.876	-3.8464	8.71745e-07	-0.483516	-2.88048	0.791706	1
Solyc01g109190	SL3.0ch01	96138544	96140544	+	7621	4391	7703	5029	63.445	60.501	-2.94379	2.35558e-06	3.14626	-0.190955	0.00279615	0.0515796
Solyc01g109210	SL3.0ch01	96139047	96141047	+	5240	2277	4735	3046	69.709	60.853	-8.8553	1.47669e-29	0.35753	2.42728	0.44097	1
Solyc01g109230	SL3.0ch01	96152977	96154977	+	943	5386	815	5549	14.9	12.806	-2.09326	0.000533493	-2.61898	1.25868	0.00144244	0.0312307
Solyc01g109270	SL3.0ch01	96176533	96178533	-	5377	8339	5620	9111	39.202	38.151	-1.05155	0.0357118	-5.12548e-15	-3.91086	1	1
Solyc01g109290	SL3.0ch01	96200939	96202939	-	6528	7155	6602	7590	47.709	46.519	-1.18967	0.0254679	0.28905	3.67559	0.388876	1
Solyc01g109300	SL3.0ch01	96200783	96202783	+	6529	7204	6605	7662	47.542	46.296	-1.24677	0.0203745	-0.108714	7.81107	0.791598	1
Solyc01g109320	SL3.0ch01	96213628	96215628	-	1017	4350	648	5209	18.949	11.064	-7.88545	8.60563e-31	0.76893	-0.840941	0.480994	1
Solyc01g109330	SL3.0ch01	96220688	96222688	-	3454	5776	3373	5957	37.421	36.152	-1.26925	0.0381978	-1.82953	0.619963	0.00372028	0.0636989
Solyc01g109340	SL3.0ch01	96227100	96229100	-	1262	1734	945	1628	42.123	36.728	-5.39528	4.03095e-05	2.21268	3.62291	0.000114659	0.00437685
Solyc01g109350	SL3.0ch01	96246196	96248196	-	2454	7013	2511	7963	25.922	23.974	-1.94797	0.00112394	-0.227003	6.8416	0.382725	1
Solyc01g109370	SL3.0ch01	96258663	96260663	+	7275	10115	7232	10702	41.834	40.326	-1.50875	0.00269262	0.170429	2.02108	0.849462	1
Solyc01g109470	SL3.0ch01	96327478	96329478	-	857	4207	846	5245	16.923	13.889	-3.03404	1.05592e-05	1.82834	-1.44593	1	1
Solyc01g109505	SL3.0ch01	96349670	96351670	-	6232	7343	5909	7776	45.908	43.179	-2.72926	6.71385e-06	5.96189	-2.76576	0.0117975	0.145258
Solyc01g109510	SL3.0ch01	96350560	96352560	+	5774	8001	6014	9199	41.917	39.532	-2.38454	3.66428e-05	-0.303235	5.6688	0.304238	0.975854
Solyc01g109520	SL3.0ch01	96367132	96369132	-	1468	6525	1106	7790	18.366	12.433	-5.93352	8.89631e-26	0.0583166	8.23434	0.822814	1
Solyc01g109570	SL3.0ch01	96396548	96398548	-	2517	7425	2187	6999	25.317	23.808	-1.50887	0.00925262	1.2096	5.94569	0.000895178	0.0216363
Solyc01g109580	SL3.0ch01	96403240	96405240	-	2472	2570	2144	2708	49.028	44.188	-4.8402	1.75968e-06	1.61449	1.58284	0.0558623	0.404278
Solyc01g109590	SL3.0ch01	96408787	96410787	-	4790	9565	5222	11863	33.368	30.565	-2.80334	1.54723e-07	1.24536	5.48195	0.000689482	0.0179748
Solyc01g109600	SL3.0ch01	96410244	96412244	+	4988	8065	5167	8953	38.213	36.593	-1.61995	0.00388373	-0.797306	5.91631	0.0224833	0.227298
Solyc01g109610	SL3.0ch01	96427255	96429255	-	4433	5349	4285	6080	45.318	41.341	-3.97688	2.03906e-08	-1.95442	-2.41206	1	1
Solyc01g109650	SL3.0ch01	96453598	96455598	-	885	8375	726	8663	9.557	7.732	-1.82478	9.85063e-06	0.895887	1.78739	0.275803	0.9339
Solyc01g109660	SL3.0ch01	96473055	96475055	+	11709	5906	13986	7427	66.472	65.315	-1.15629	0.00990889	0.28755	9.93334	0.372472	1
Solyc01g109655	SL3.0ch01	96473058	96475058	+	11647	5892	13931	7404	66.406	65.296	-1.10983	0.0127424	-5.12548e-15	-3.91086	1	1
Solyc01g109700	SL3.0ch01	96507268	96509268	+	760	3794	392	4671	16.689	7.742	-8.94618	1.88066e-40	1.62989	4.39206	0.00101285	0.0237248
Solyc01g109710	SL3.0ch01	96517857	96519857	-	3288	7798	3344	8725	29.659	27.707	-1.95168	0.000793197	0.979461	6.42788	0.0484125	0.370083
Solyc01g109720	SL3.0ch01	96521952	96523952	-	4773	6598	4041	6659	41.975	37.766	-4.20884	3.63977e-10	2.23441	2.52874	0.010982	0.138214
Solyc01g109730	SL3.0ch01	96522646	96524646	+	4910	5459	3983	4995	47.353	44.364	-2.98868	3.20737e-05	4.8074	-2.64254	0.129205	0.643469
Solyc01g109800	SL3.0ch01	96575044	96577044	+	7900	6579	9302	8233	54.562	53.048	-1.51359	0.00440451	-2.32435	3.82225	0.000374002	0.0111348
Solyc01g109820	SL3.0ch01	96587687	96589687	-	746	5638	646	5798	11.685	10.025	-1.66063	0.0018154	-5.12548e-15	-3.87171	1	1
Solyc01g109860	SL3.0ch01	96611106	96613106	+	2322	5706	2125	5656	28.924	27.31	-1.61365	0.014069	1.58154	1.09132	0.135456	0.65954
Solyc01g109870	SL3.0ch01	96622387	96624387	-	2528	6505	3108	9608	27.986	24.442	-3.54462	7.97966e-09	-0.246602	6.09878	0.462029	1
Solyc01g109890	SL3.0ch01	96647708	96649708	+	3670	4312	4388	5635	45.978	43.779	-2.19914	0.00223016	1.36793	6.33175	0.000256316	0.00834204
Solyc01g109900	SL3.0ch01	96656162	96658162	+	1224	2789	834	2412	30.501	25.693	-4.80771	7.16501e-06	3.9875	-0.409257	0.0279599	0.262222
Solyc01g109940	SL3.0ch01	96686279	96688279	-	7974	5306	8552	7139	60.045	54.503	-5.5426	1.32207e-20	0.169851	7.05043	0.568092	1
Solyc01g109950	SL3.0ch01	96686204	96688204	+	7977	5460	8559	7350	59.366	53.8	-5.56619	5.91323e-21	-5.12548e-15	-3.91086	1	1
Solyc01g109980	SL3.0ch01	96716610	96718610	-	5582	5067	5538	6059	52.418	47.754	-4.66434	9.77859e-12	-0.480766	5.21466	0.0921052	0.536229
Solyc01g110010	SL3.0ch01	96750498	96752498	-	3029	5755	3718	7508	34.483	33.12	-1.36361	0.0234679	-0.333623	1.14729	0.619183	1
Solyc01g110020	SL3.0ch01	96749628	96751628	+	3004	5056	3688	7125	37.27	34.107	-3.16338	8.17545e-06	-0.404294	5.33407	0.153287	0.705159
Solyc01g110060	SL3.0ch01	96775794	96777794	-	8613	11871	8738	12849	42.047	40.478	-1.56939	0.000829967	2.86558	0.565712	0.00581574	0.0871902
Solyc01g110110	SL3.0ch01	96801920	96803920	+	7782	8972	7765	10136	46.449	43.377	-3.07114	1.56032e-08	-2.10343	-3.41138	0.400452	1
Solyc01g110130	SL3.0ch01	96824652	96826652	-	465	3248	393	3186	12.524	10.981	-1.54284	0.0226356	1.36929	4.83611	0.00208469	0.0414091
Solyc01g110160	SL3.0ch01	96851067	96853067	-	3852	7171	4109	8421	34.945	32.793	-2.15182	0.000398846	0.673007	0.333602	0.661904	1
Solyc01g110180	SL3.0ch01	96856207	96858207	+	2897	8011	2030	7571	26.558	21.144	-5.41486	6.51075e-19	3.08219	-3.22178	0.477935	1
Solyc01g110190	SL3.0ch01	96874998	96876998	-	1290	7422	996	6301	14.807	13.649	-1.15772	0.021274	4.74624	-1.26164	0.0569191	0.408618
Solyc01g110200	SL3.0ch01	96881490	96883490	+	2649	8331	2570	9019	24.126	22.176	-1.94948	0.000426078	-5.12548e-15	-3.91086	1	1
Solyc01g110210	SL3.0ch01	96885400	96887400	+	7133	8657	6296	8740	45.174	41.873	-3.30132	8.98182e-09	-1.99386	-3.67524	1	1
Solyc01g110230	SL3.0ch01	96892752	96894752	+	8052	7824	7502	8703	50.718	46.294	-4.42371	8.24219e-15	-5.12548e-15	-3.91086	1	1
Solyc01g110240	SL3.0ch01	96894998	96896998	+	499	4648	235	3983	9.695	5.571	-4.12361	2.62146e-13	-5.12548e-15	-3.91086	1	1
Solyc01g110370	SL3.0ch01	97006412	97008412	-	4246	5862	4522	6609	42.006	40.625	-1.38105	0.0225509	1.65641	4.32743	4.79369e-05	0.00225785
Solyc01g110380	SL3.0ch01	97012371	97014371	+	925	7262	713	6817	11.298	9.469	-1.82961	0.000158021	-0.0148656	5.59128	0.961366	1
Solyc01g110440	SL3.0ch01	97057950	97059950	+	2226	7986	2203	8702	21.798	20.202	-1.59614	0.00298754	1.34703	4.56855	0.057989	0.41359
Solyc01g110470	SL3.0ch01	97082069	97084069	+	5262	9023	5416	10594	36.836	33.829	-3.00698	7.19037e-08	-0.51872	3.20728	0.17738	0.757586
Solyc01g110480	SL3.0ch01	97091043	97093043	+	2260	9173	2040	10303	19.767	16.528	-3.23975	1.98061e-10	1.21754	6.753	0.00112318	0.0257361
Solyc01g110510	SL3.0ch01	97103834	97105834	+	36	275	0	30	11.576	0	-11.5756	0.0298626	-0.727156	-0.0298139	0.314448	0.989893
Solyc01g110530	SL3.0ch01	97114771	97116771	-	9026	7617	11247	10337	54.233	52.108	-2.12497	3.58696e-05	0.797427	6.25835	0.0191202	0.203418
Solyc01g110540	SL3.0ch01	97114508	97116508	+	9020	7529	11222	9933	54.505	53.047	-1.45824	0.00327088	0.556701	4.41128	0.185336	0.774248
Solyc01g110560	SL3.0ch01	97124617	97126617	+	4766	5186	5366	6813	47.89	44.059	-3.83042	2.13542e-08	-0.114323	2.37482	0.877465	1
Solyc01g110590	SL3.0ch01	97154330	97156330	-	6383	7160	7038	8250	47.131	46.036	-1.09525	0.0328266	-5.12548e-15	-1.02232	1	1
Solyc01g110735	SL3.0ch01	97257165	97259165	-	14	226	1	474	5.833	0.211	-5.62281	2.22472e-06	-1.79935	0.0896997	0.0160471	0.179591
Solyc01g110760	SL3.0ch01	97254119	97256119	-	4666	5038	5331	6093	48.083	46.665	-1.41835	0.022119	2.40892	-2.42265	0.321304	0.997984
Solyc01g110770	SL3.0ch01	97257341	97259341	-	14	226	1	474	5.833	0.211	-5.62281	2.22472e-06	-5.12548e-15	-3.91086	1	1
Solyc01g110830	SL3.0ch01	97276911	97278911	-	2536	5230	1663	5039	32.655	24.813	-7.84168	2.27051e-24	3.50287	-3.71689	0.387468	1
Solyc01g110930	SL3.0ch01	97314136	97316136	+	11	9	10	194	55	4.902	-50.098	4.37628e-08	1.53086	-2.07389	0.46747	1
Solyc01g110990	SL3.0ch01	97326483	97328483	+	896	1046	599	1612	46.138	27.092	-19.0462	4.73617e-36	0.522257	5.026	0.0942601	0.542826
Solyc01g111080	SL3.0ch01	97379465	97381465	-	5462	7820	5116	8887	41.123	36.535	-4.5883	2.61143e-14	-0.502398	2.64519	0.358996	1
Solyc01g111070	SL3.0ch01	97373896	97375896	+	58	435	0	60	11.765	0	-11.7647	0.000988878	1.85747	-2.37887	0.188886	0.780777
Solyc01g111075	SL3.0ch01	97379463	97381463	-	5462	7820	5116	8887	41.123	36.535	-4.5883	2.61143e-14	-5.12548e-15	-3.91086	1	1
Solyc01g111190	SL3.0ch01	97442867	97444867	+	9411	9156	10826	11840	50.687	47.763	-2.92353	6.30115e-09	-0.196329	3.10559	0.613737	1
Solyc01g111280	SL3.0ch01	97498508	97500508	-	2787	7753	3497	11144	26.442	23.885	-2.55714	4.64052e-06	-0.194742	2.96395	0.741825	1
Solyc01g111275	SL3.0ch01	97501999	97503999	-	2154	4089	2167	5019	34.503	30.156	-4.34678	1.13304e-07	-5.12548e-15	-3.87428	1	1
Solyc01g111290	SL3.0ch01	97498863	97500863	+	2763	6542	3446	9145	29.694	27.369	-2.32496	0.000145436	-5.12548e-15	-3.91086	1	1
Solyc01g111320	SL3.0ch01	97516409	97518409	+	6221	9428	4911	9521	39.753	34.029	-5.72479	7.45827e-24	0.0852146	4.25595	0.791956	1
Solyc01g111330	SL3.0ch01	97516409	97518409	+	6221	9428	4911	9521	39.753	34.029	-5.72479	7.45827e-24	-4.53099	-1.82577	0.0791458	0.495603
Solyc01g111340	SL3.0ch01	97534980	97536980	-	2167	2538	2192	3999	46.057	35.406	-10.6512	3.35593e-28	-1.07602	3.16949	0.083715	0.50961
Solyc01g111420	SL3.0ch01	97586795	97588795	+	34	278	1	60	10.897	1.639	-9.25809	0.0154207	-0.108124	5.24045	0.723491	1
Solyc01g111430	SL3.0ch01	97594119	97596119	-	132	674	14	300	16.377	4.459	-11.9186	1.69311e-08	0.107623	0.74134	0.89628	1
Solyc01g111520	SL3.0ch01	97665415	97667415	-	7703	7572	8054	9142	50.429	46.836	-3.59233	2.17263e-10	0.514795	7.44201	0.0528726	0.391218
Solyc01g111540	SL3.0ch01	97684332	97686332	+	8253	8498	8033	8770	49.269	47.807	-1.46176	0.0047323	-5.01325	-3.06708	0.059179	0.418553
Solyc01g111560	SL3.0ch01	97699923	97701923	+	5806	7361	5532	7964	44.095	40.99	-3.10516	4.15052e-07	0.497982	6.3453	0.0866427	0.517843
Solyc01g111580	SL3.0ch01	97719095	97721095	+	5450	9440	5246	9840	36.602	34.774	-1.82778	0.000747954	0.289152	4.60229	0.345132	1
Solyc01g111590	SL3.0ch01	97729226	97731226	-	169	2442	100	2068	6.473	4.613	-1.86007	0.00360521	-0.291111	-0.905179	0.857843	1
Solyc01g111680	SL3.0ch01	97791756	97793756	-	133	1712	97	2674	7.209	3.501	-3.70813	3.77985e-08	-0.0954677	4.93483	0.751072	1
Solyc01g111690	SL3.0ch01	97793493	97795493	+	343	8831	281	10089	3.739	2.71	-1.02909	4.92954e-05	0.230721	3.44155	0.48826	1
Solyc01g111720	SL3.0ch01	97815873	97817873	-	10420	6651	14272	9737	61.039	59.444	-1.59481	0.000854119	-0.167386	5.61522	0.544796	1
Solyc01g111850	SL3.0ch01	97926160	97928160	-	49	696	28	1321	6.577	2.076	-4.50157	4.87839e-07	-5.12548e-15	-3.91086	1	1
Solyc01g111870	SL3.0ch01	97953052	97955052	-	4491	8589	4634	9698	34.335	32.333	-2.00162	0.000366753	-0.501611	1.52571	0.358072	1
Solyc01g111880	SL3.0ch01	97963709	97965709	-	558	2501	466	2863	18.241	13.998	-4.24306	4.5242e-06	0.389669	3.46359	0.529587	1
Solyc01g111970	SL3.0ch01	98025336	98027336	-	445	7513	403	7748	5.592	4.944	-0.647679	0.0343553	2.16427	5.67059	0.000797766	0.0198294
Solyc01g112010	SL3.0ch01	98053866	98055866	-	5624	11038	5146	11040	33.753	31.793	-1.96054	0.000138915	-0.827169	2.27946	0.0801075	0.499005
Solyc01g112240	SL3.0ch01	98192204	98194204	-	137	1096	65	717	11.111	8.312	-2.79909	0.0254364	-0.0205524	3.75565	0.948646	1
Solyc01g112270	SL3.0ch01	98256766	98258766	-	10	30	2	48	25	4	-21	0.00310038	3.13196	-2.35083	0.0715624	0.46807
Solyc01g112290	SL3.0ch01	98263819	98265819	+	5667	5033	6489	6019	52.963	51.879	-1.08382	0.0492006	-0.546562	7.38037	0.0746342	0.479267
Solyc01g112300	SL3.0ch01	98280459	98282459	+	1555	4733	1553	6103	24.73	20.285	-4.4449	7.62515e-10	-0.485873	2.7818	0.188388	0.780648
Solyc01g112330	SL3.0ch01	98331126	98333126	-	4533	7966	4788	9173	36.267	34.296	-1.97136	0.000640847	-5.12548e-15	-3.91086	1	1
Solyc02g043990	SL3.0ch02	235829	237829	+	392	7833	228	7873	4.766	2.814	-1.95149	1.31308e-10	-5.12548e-15	-3.91086	1	1
Solyc02g043970	SL3.0ch02	348388	350388	+	3357	3292	3141	3337	50.489	48.487	-2.00161	0.0127798	-5.12548e-15	-3.60733	1	1
Solyc02g043864	SL3.0ch02	1305334	1307334	+	343	274	103	218	55.592	32.087	-23.5043	1.68353e-11	3.63	-3.67787	0.3176	0.994999
Solyc02g043830	SL3.0ch02	1305506	1307506	+	343	274	103	218	55.592	32.087	-23.5043	1.68353e-11	-5.12548e-15	-3.87249	1	1
Solyc02g043815	SL3.0ch02	1676887	1678887	+	52	1206	5	332	4.134	1.484	-2.64987	0.0114298	-5.12548e-15	-3.91086	1	1
Solyc02g049080	SL3.0ch02	3865324	3867324	-	1646	4532	1550	4977	26.643	23.748	-2.89542	0.000154999	-5.12548e-15	-3.87428	1	1
Solyc02g050183	SL3.0ch02	4144787	4146787	+	896	4957	1141	7223	15.308	13.642	-1.66659	0.00362639	-3.29041	-3.76263	0.465061	1
Solyc02g050187	SL3.0ch02	4145219	4147219	+	666	3630	945	5885	15.503	13.836	-1.66678	0.00952748	1.19257	-2.65209	0.534242	1
Solyc02g050283	SL3.0ch02	4960616	4962616	-	6524	5122	6142	6862	56.019	47.232	-8.78761	7.01994e-42	-5.12548e-15	-3.69106	1	1
Solyc02g050287	SL3.0ch02	4957214	4959214	+	175	659	65	518	20.983	11.149	-9.83399	1.09907e-06	-0.367188	2.79332	0.387602	1
Solyc02g050290	SL3.0ch02	4966375	4968375	-	2900	8137	2274	7322	26.275	23.697	-2.57788	2.12805e-05	-5.12548e-15	-3.91086	1	1
Solyc02g050330	SL3.0ch02	5378898	5380898	+	1644	9478	1682	10496	14.782	13.812	-0.969722	0.0196841	-1.03517	2.09212	0.0705104	0.464422
Solyc02g005180	SL3.0ch02	7346733	7348733	+	7721	9225	7500	9327	45.562	44.571	-0.99115	0.034919	0.2419	2.84188	0.585286	1
Solyc02g005185	SL3.0ch02	7414885	7416885	+	3001	4916	2785	4908	37.906	36.202	-1.70403	0.0161337	-5.12548e-15	-3.91086	1	1
Solyc02g005340	SL3.0ch02	8237948	8239948	-	1533	7062	1614	8760	17.836	15.558	-2.27783	2.88786e-05	-5.12548e-15	-3.76162	1	1
Solyc02g005410	SL3.0ch02	8621839	8623839	-	3789	7343	2495	6086	34.037	29.076	-4.96115	3.52717e-13	-5.12548e-15	-3.91086	1	1
Solyc02g005430	SL3.0ch02	9018072	9020072	+	4034	6652	2935	6514	37.75	31.061	-6.68884	1.52398e-22	-5.12548e-15	-3.91086	1	1
Solyc02g005490	SL3.0ch02	9306619	9308619	-	1551	9374	1210	8992	14.197	11.86	-2.33638	6.45806e-07	-1.93409	-1.17389	1	1
Solyc02g010680	SL3.0ch02	13530589	13532589	-	3277	5263	2888	5132	38.372	36.01	-2.36239	0.00123104	-5.12548e-15	-3.91086	1	1
Solyc02g011950	SL3.0ch02	14175243	14177243	-	1776	3863	2029	4872	31.495	29.402	-2.09341	0.00719609	-5.12548e-15	-3.91086	1	1
Solyc02g011975	SL3.0ch02	14175175	14177175	+	1804	3945	2008	4873	31.379	29.182	-2.19757	0.00485773	-5.12548e-15	-3.91086	1	1
Solyc02g012010	SL3.0ch02	14189905	14191905	-	2428	8670	2409	9352	21.878	20.483	-1.39486	0.00619334	-5.12548e-15	-3.91086	1	1
Solyc02g012020	SL3.0ch02	14191350	14193350	-	1587	6417	1307	6568	19.828	16.597	-3.23076	1.95721e-07	-5.12548e-15	-3.91086	1	1
Solyc02g014040	SL3.0ch02	15342533	15344533	-	2356	2509	2933	3379	48.428	46.467	-1.9605	0.0222036	2.56691	-3.44171	0.645916	1
Solyc02g014070	SL3.0ch02	15373977	15375977	-	2926	2926	3171	3422	50	48.096	-1.90353	0.0188546	-5.12548e-15	-3.46725	1	1
Solyc02g014150	SL3.0ch02	15676471	15678471	+	3297	5252	2583	5645	38.566	31.393	-7.17311	1.4193e-21	0.06504	5.40183	0.833922	1
Solyc02g014180	SL3.0ch02	15743443	15745443	-	133	985	51	690	11.896	6.883	-5.01365	0.000280875	-0.22232	3.80106	0.750385	1
Solyc02g014290	SL3.0ch02	16183768	16185768	+	3473	4531	3305	4615	43.391	41.73	-1.66101	0.019014	-5.12548e-15	-3.91086	1	1
Solyc02g014355	SL3.0ch02	16286174	16288174	+	24	611	2	285	3.78	0.697	-3.08266	0.00531096	-0.198252	3.5036	0.561432	1
Solyc02g014360	SL3.0ch02	16308848	16310848	-	4743	8897	5335	10440	34.773	33.819	-0.953393	0.0436213	-0.428602	3.08917	0.273101	0.929957
Solyc02g014545	SL3.0ch02	17612567	17614567	+	3059	7492	2307	7386	28.993	23.801	-5.19183	2.36045e-16	-5.12548e-15	-3.91086	1	1
Solyc02g014670	SL3.0ch02	18128117	18130117	+	1971	6961	1756	6709	22.067	20.744	-1.32249	0.0193541	-0.825858	-1.81717	1	1
Solyc02g014690	SL3.0ch02	18157504	18159504	+	1529	3100	1112	2740	33.031	28.868	-4.16277	3.62212e-05	-3.29994	-2.4932	0.44463	1
Solyc02g014740	SL3.0ch02	18503348	18505348	+	4357	11529	4415	12376	27.427	26.294	-1.13282	0.0124496	-5.12548e-15	-3.71918	1	1
Solyc02g014777	SL3.0ch02	19007003	19009003	+	559	1431	537	1599	28.09	25.14	-2.95	0.0189717	-5.12548e-15	-3.91086	1	1
Solyc02g014843	SL3.0ch02	19186284	19188284	+	8964	10550	7724	12822	45.936	37.594	-8.34256	1.02741e-62	-0.211976	-3.04292	1	1
Solyc02g014860	SL3.0ch02	19700358	19702358	+	2346	2546	2507	2965	47.956	45.815	-2.14079	0.0168566	0.595662	6.58188	0.176687	0.756132
Solyc02g020880	SL3.0ch02	20730966	20732966	+	4897	6944	5964	9232	41.356	39.247	-2.10913	0.000369352	-0.0403868	-0.929959	1	1
Solyc02g020890	SL3.0ch02	20763292	20765292	+	5656	3615	6507	4647	61.007	58.338	-2.66963	9.80657e-05	3.44822	5.31437	2.35322e-07	3.25527e-05
Solyc02g020920	SL3.0ch02	20830488	20832488	+	766	4945	680	5139	13.413	11.686	-1.72686	0.0035116	0.617732	-2.50563	0.761952	1
Solyc02g021010	SL3.0ch02	21776322	21778322	-	2104	4710	1810	4430	30.878	29.006	-1.87119	0.0119914	-2.48678	-3.7999	0.624078	1
Solyc02g021170	SL3.0ch02	22318246	22320246	-	2554	3494	2560	3854	42.229	39.913	-2.31614	0.00546303	-5.12548e-15	-3.91086	1	1
Solyc02g021260	SL3.0ch02	22875342	22877342	+	7986	10294	8472	11509	43.687	42.4	-1.28681	0.00694171	0.345024	2.24165	0.66857	1
Solyc02g021290	SL3.0ch02	22894112	22896112	-	1491	5012	1816	6676	22.928	21.385	-1.54305	0.0141059	-1.68164	-0.315193	0.178706	0.760894
Solyc02g021350	SL3.0ch02	22991031	22993031	+	4036	9753	4089	10558	29.27	27.917	-1.35273	0.00714389	-4.06737	-1.05344	0.00599988	0.0888629
Solyc02g021360	SL3.0ch02	23023210	23025210	-	4625	7430	5372	9269	38.366	36.691	-1.67434	0.00328795	0.0528555	4.01547	0.878187	1
Solyc02g021450	SL3.0ch02	23239759	23241759	+	2447	8213	1702	8565	22.955	16.577	-6.37759	5.73965e-30	-5.12548e-15	-3.91086	1	1
Solyc02g021630	SL3.0ch02	23802646	23804646	+	5888	5236	5490	5658	52.931	49.247	-3.6841	5.84815e-08	-5.12548e-15	-1.96348	1	1
Solyc02g022890	SL3.0ch02	24859150	24861150	+	3421	6468	3251	6680	34.594	32.736	-1.85812	0.00370245	6.81604	-0.0202057	0.000576146	0.0157671
Solyc02g022910	SL3.0ch02	24879081	24881081	+	822	2714	744	3139	23.247	19.16	-4.08616	1.72762e-05	-5.12548e-15	-3.91086	1	1
Solyc02g030080	SL3.0ch02	25542252	25544252	-	5136	6944	5682	8500	42.517	40.065	-2.45169	5.5616e-05	-0.460026	6.15283	0.121132	0.621793
Solyc02g030185	SL3.0ch02	25757472	25759472	-	4763	5792	4155	5348	45.126	43.723	-1.4025	0.0248578	-5.12548e-15	-3.91086	1	1
Solyc02g030215	SL3.0ch02	25804382	25806382	+	1621	3050	1618	3918	34.703	29.227	-5.47661	5.84748e-09	2.15563	-1.9138	0.125534	0.633409
Solyc02g030470	SL3.0ch02	26471944	26473944	+	1556	1399	2023	2048	52.657	49.693	-2.96356	0.00876307	-5.12548e-15	-3.91086	1	1
Solyc02g030466	SL3.0ch02	26554915	26556915	-	2021	7652	1946	8012	20.893	19.542	-1.35113	0.0110775	-5.12548e-15	-3.91086	1	1
Solyc02g030480	SL3.0ch02	26691476	26693476	+	3347	6754	3291	8120	33.135	28.841	-4.29474	2.65971e-11	1.85209	-1.62337	1	1
Solyc02g031750	SL3.0ch02	27336439	27338439	+	7282	8931	7513	9728	44.915	43.576	-1.33822	0.00844592	1.07377	-0.710232	0.4215	1
Solyc02g031820	SL3.0ch02	27493717	27495717	-	3705	5838	4047	7048	38.824	36.476	-2.34838	0.000425201	-5.12548e-15	-3.91086	1	1
Solyc02g031860	SL3.0ch02	27579234	27581234	-	8001	7018	8803	8597	53.273	50.592	-2.68057	1.78361e-06	0.0492815	6.59509	0.914555	1
Solyc02g032030	SL3.0ch02	27794086	27796086	-	2967	6447	3046	7148	31.517	29.88	-1.63657	0.00794175	-3.3205	-3.1083	0.158179	0.715084
Solyc02g032040	SL3.0ch02	27833999	27835999	+	3548	6382	3355	6549	35.73	33.875	-1.85491	0.00410695	-5.12548e-15	-3.91086	1	1
Solyc02g032080	SL3.0ch02	27925744	27927744	+	2311	3219	3357	5213	41.79	39.172	-2.61871	0.00147288	-5.12548e-15	-3.66338	1	1
Solyc02g032250	SL3.0ch02	28537743	28539743	-	1162	8732	1353	13145	11.744	9.332	-2.41217	2.64961e-09	-5.12548e-15	-3.91086	1	1
Solyc02g032270	SL3.0ch02	28557417	28559417	-	3460	5635	3684	7340	38.043	33.418	-4.62488	2.32751e-11	-1.46667	-2.62227	0.423303	1
Solyc02g032310	SL3.0ch02	28686566	28688566	+	1602	3383	1425	3434	32.136	29.327	-2.80939	0.00179249	-5.12548e-15	-3.91086	1	1
Solyc02g032337	SL3.0ch02	28756088	28758088	-	1918	5763	2004	6696	24.971	23.034	-1.93622	0.00266711	-5.12548e-15	-3.91086	1	1
Solyc02g032370	SL3.0ch02	28868863	28870863	-	5800	6760	6819	8452	46.178	44.653	-1.52508	0.0067941	4.87949	-2.78237	0.0347336	0.300957
Solyc02g032590	SL3.0ch02	29272837	29274837	-	992	1972	842	1861	33.468	31.151	-2.31771	0.033474	-5.12548e-15	-3.91086	1	1
Solyc02g032650	SL3.0ch02	29382218	29384218	+	3148	7099	3382	8875	30.721	27.592	-3.12879	3.83114e-07	2.17379	1.55506	0.0159704	0.179069
Solyc02g032670	SL3.0ch02	29441374	29443374	-	2477	7056	2591	7798	25.983	24.94	-1.04359	0.0465928	-5.12548e-15	-3.91086	1	1
Solyc02g032685	SL3.0ch02	29488645	29490645	-	1804	3487	1683	4165	34.096	28.779	-5.31656	2.87638e-09	-5.12548e-15	-3.86883	1	1
Solyc02g032840	SL3.0ch02	29879984	29881984	-	6586	7525	7471	9271	46.673	44.624	-2.04851	0.000268734	3.75246	-1.00448	0.163023	0.725693
Solyc02g032860	SL3.0ch02	29911879	29913879	+	2323	3595	1912	3550	39.253	35.005	-4.24763	3.34801e-06	0.0831854	5.10812	0.907484	1
Solyc02g032910	SL3.0ch02	29938983	29940983	+	5697	8565	6080	9814	39.945	38.253	-1.69188	0.00185785	1.75694	3.18158	0.0121246	0.147961
Solyc02g032970	SL3.0ch02	30011785	30013785	+	7909	8872	7050	8339	47.131	45.812	-1.31874	0.0106963	0.20471	5.15671	0.519164	1
Solyc02g032980	SL3.0ch02	30061475	30063475	-	4076	6739	4102	7133	37.688	36.511	-1.17749	0.0368887	-5.12548e-15	-3.91086	1	1
Solyc02g033000	SL3.0ch02	30092196	30094196	-	2738	5037	3017	5972	35.215	33.563	-1.65219	0.0144821	-5.12548e-15	-3.62035	1	1
Solyc02g036230	SL3.0ch02	30733490	30735490	-	870	3209	646	2626	21.329	19.743	-1.58548	0.0487294	-5.12548e-15	-3.91086	1	1
Solyc02g036220	SL3.0ch02	30839649	30841649	-	1957	6600	1820	6572	22.87	21.687	-1.18284	0.033583	-5.12548e-15	-3.80295	1	1
Solyc02g036240	SL3.0ch02	30870739	30872739	-	2839	7027	2586	7566	28.776	25.473	-3.30278	2.12431e-07	-5.12548e-15	-3.91086	1	1
Solyc02g036280	SL3.0ch02	30960192	30962192	+	773	1425	154	363	35.168	29.787	-5.3811	0.0118474	-0.715811	-0.0953474	0.286773	0.951181
Solyc02g036350	SL3.0ch02	31050613	31052613	+	1044	11317	791	12210	8.446	6.084	-2.36177	1.24085e-12	3.1998	10.0062	5.79835e-05	0.00263527
Solyc02g036370	SL3.0ch02	31085374	31087374	-	2586	10604	2730	12402	19.606	18.041	-1.56452	0.000604686	-1.06853	4.70401	0.00145691	0.0315059
Solyc02g036390	SL3.0ch02	31169076	31171076	+	1430	7523	1305	7948	15.972	14.104	-1.86877	0.000337306	-5.12548e-15	-3.62282	1	1
Solyc02g036450	SL3.0ch02	31273565	31275565	-	7133	4330	7871	5202	62.226	60.208	-2.01823	0.0009153	0.240708	5.34245	0.392955	1
Solyc02g037490	SL3.0ch02	31389407	31391407	-	8179	8269	9059	9747	49.726	48.171	-1.55561	0.00248688	-5.12548e-15	-2.35892	1	1
Solyc02g038650	SL3.0ch02	31714698	31716698	+	2427	4491	2321	5066	35.082	31.42	-3.66233	4.0273e-06	-5.12548e-15	-3.91086	1	1
Solyc02g038760	SL3.0ch02	32014421	32016421	+	9650	6529	11614	8575	59.645	57.526	-2.11884	4.46751e-05	-0.0657248	4.56343	0.831341	1
Solyc00g007450	SL3.0ch02	32299960	32301960	+	3337	8924	3577	10214	27.216	25.937	-1.27917	0.0114382	-5.12548e-15	-3.91086	1	1
Solyc00g007330	SL3.0ch02	32385156	32387156	+	459	928	523	1235	33.093	29.75	-3.34329	0.0256681	-5.12548e-15	-3.91086	1	1
Solyc00g007260	SL3.0ch02	32496785	32498785	-	3648	9565	3786	10963	27.609	25.67	-1.93964	0.000210047	0.234535	3.33517	0.521376	1
Solyc00g007130	SL3.0ch02	32650149	32652149	+	1458	4295	1877	6224	25.343	23.17	-2.17332	0.00221517	0.400297	0.323957	0.582708	1
Solyc00g007110	SL3.0ch02	32678253	32680253	-	10765	8530	12072	10605	55.792	53.235	-2.5571	2.21588e-07	-0.647815	1.15981	0.434757	1
Solyc00g007050	SL3.0ch02	32729311	32731311	-	4570	5820	4713	6480	43.985	42.107	-1.87793	0.00356556	-5.12548e-15	-3.91086	1	1
Solyc00g007010	SL3.0ch02	32820702	32822702	+	5871	9737	5994	11040	37.615	35.188	-2.42688	5.94094e-06	-0.111791	4.40867	0.702915	1
Solyc02g060600	SL3.0ch02	33617910	33619910	-	1634	5996	1449	5755	21.415	20.114	-1.30164	0.0274917	-5.12548e-15	-3.91086	1	1
Solyc02g061660	SL3.0ch02	33709435	33711435	-	481	1988	293	1890	19.482	13.422	-6.05968	4.77553e-08	-5.12548e-15	-3.91086	1	1
Solyc02g061680	SL3.0ch02	33752156	33754156	-	1324	7247	1317	8010	15.447	14.12	-1.32714	0.00775517	-5.12548e-15	-3.91086	1	1
Solyc02g061740	SL3.0ch02	33816396	33818396	+	4265	4869	3360	4563	46.694	42.408	-4.28549	3.25744e-08	-5.12548e-15	-3.91086	1	1
Solyc02g061750	SL3.0ch02	33817235	33819235	+	628	773	514	782	44.825	39.66	-5.16463	0.00454472	-5.12548e-15	-3.91086	1	1
Solyc02g061810	SL3.0ch02	33869129	33871129	-	4106	3092	3758	3437	57.044	52.231	-4.81291	1.14648e-08	-0.472363	3.56354	0.175323	0.752757
Solyc02g061870	SL3.0ch02	33977368	33979368	-	4916	7372	4267	6923	40.007	38.132	-1.87425	0.00229381	-5.12548e-15	-1.94471	1	1
Solyc02g061890	SL3.0ch02	33991595	33993595	-	34	1422	2	486	2.335	0.41	-1.92533	0.00230149	-5.12548e-15	-3.91086	1	1
Solyc02g061955	SL3.0ch02	34035700	34037700	+	374	1282	438	1807	22.585	19.51	-3.07452	0.01198	-1.74872	-3.79772	1	1
Solyc02g061980	SL3.0ch02	34061227	34063227	+	2826	7131	2729	8142	28.382	25.103	-3.27856	1.3771e-07	-0.0754256	6.40189	0.778873	1
Solyc02g061990	SL3.0ch02	34100190	34102190	+	4177	11363	4473	12780	26.879	25.926	-0.953096	0.0274005	1.83959	1.09089	0.0791163	0.495603
Solyc02g062140	SL3.0ch02	34253891	34255891	-	3288	11732	3188	13497	21.891	19.107	-2.78383	1.7067e-09	0.570536	5.68631	0.0302216	0.274515
Solyc02g062180	SL3.0ch02	34289037	34291037	-	2941	9001	2845	9674	24.627	22.725	-1.90191	0.000380852	0.0437068	4.46322	0.887844	1
Solyc02g062250	SL3.0ch02	34393472	34395472	+	441	1849	280	1460	19.258	16.092	-3.16569	0.00623702	0.4046	5.21884	0.164534	0.729106
Solyc02g062300	SL3.0ch02	34429669	34431669	-	2144	5787	2137	7239	27.033	22.792	-4.24093	2.84021e-10	-0.844801	1.50172	0.104736	0.577206
Solyc02g062350	SL3.0ch02	34502588	34504588	-	1957	4362	1032	2667	30.97	27.899	-3.07066	0.00089703	0.0494765	5.28881	0.876383	1
Solyc02g062420	SL3.0ch02	34565657	34567657	+	4123	7290	4372	8585	36.125	33.742	-2.38309	8.86698e-05	-0.143268	3.64245	0.672418	1
Solyc02g062460	SL3.0ch02	34615148	34617148	+	7393	10329	7605	11859	41.717	39.072	-2.64438	2.93394e-07	-0.182386	7.9277	0.705167	1
Solyc02g062470	SL3.0ch02	34700359	34702359	+	4376	5681	4573	6471	43.512	41.407	-2.10488	0.0014576	-1.23206	3.11225	0.173049	0.748171
Solyc02g062500	SL3.0ch02	34715967	34717967	+	4449	9427	4066	9605	32.063	29.742	-2.32076	3.10253e-05	-0.414267	11.7045	0.310928	0.984941
Solyc02g062550	SL3.0ch02	34822701	34824701	-	97	1656	66	1588	5.533	3.99	-1.54304	0.0202206	4.87623	3.75631	4.10414e-06	0.000317742
Solyc02g062580	SL3.0ch02	34845408	34847408	+	10	43	11	242	18.868	4.348	-14.5201	0.000635872	0.709605	1.68458	0.120664	0.620371
Solyc02g062590	SL3.0ch02	34857393	34859393	-	1651	7302	1868	9085	18.441	17.055	-1.38606	0.00680884	-2.6577	-3.3412	0.571018	1
Solyc02g062640	SL3.0ch02	34927317	34929317	+	675	7878	522	9446	7.892	5.237	-2.65521	7.79754e-13	-0.16109	5.19555	0.565482	1
Solyc02g062680	SL3.0ch02	34952321	34954321	-	8240	10993	9980	14365	42.843	40.994	-1.84899	9.219e-05	-0.161133	4.29996	0.629225	1
Solyc02g062750	SL3.0ch02	35069552	35071552	+	4538	3876	3971	3757	53.934	51.385	-2.54934	0.000899361	1.81191	-3.83033	1	1
Solyc02g062830	SL3.0ch02	35208234	35210234	+	1642	2895	728	1797	36.191	28.832	-7.35963	6.40984e-10	1.52038	-3.6388	0.760861	1
Solyc02g062890	SL3.0ch02	35382942	35384942	-	4930	11656	5270	13455	29.724	28.144	-1.57967	0.00083271	-5.12548e-15	-3.91086	1	1
Solyc02g062900	SL3.0ch02	35382874	35384874	-	4916	11018	5222	12394	30.852	29.644	-1.20876	0.00959734	-5.12548e-15	-3.91086	1	1
Solyc02g062920	SL3.0ch02	35403711	35405711	+	2415	4887	2541	5485	33.073	31.66	-1.41352	0.0321989	-0.380438	6.44376	0.157258	0.713625
Solyc02g062960	SL3.0ch02	35481648	35483648	-	4630	7394	5277	8872	38.506	37.296	-1.2104	0.0240587	-5.12548e-15	-2.09695	1	1
Solyc02g063080	SL3.0ch02	35681846	35683846	-	1271	7692	1663	11116	14.181	13.014	-1.16698	0.00835983	-1.97444	-3.79399	1	1
Solyc02g063090	SL3.0ch02	35699013	35701013	+	360	1287	266	1570	21.858	14.488	-7.36991	2.88462e-08	-0.0359925	6.32039	0.896646	1
Solyc02g063120	SL3.0ch02	35714612	35716612	-	1451	5479	1296	5938	20.938	17.915	-3.02255	6.49575e-06	-5.12548e-15	-3.02894	1	1
Solyc02g063150	SL3.0ch02	35768438	35770438	+	5384	9674	5194	10653	35.755	32.776	-2.97916	5.57044e-08	1.07929	6.13351	0.176277	0.75519
Solyc02g063160	SL3.0ch02	35777363	35779363	+	6967	10912	8289	13638	38.968	37.803	-1.16479	0.0103752	0.724161	3.64337	0.039218	0.323737
Solyc02g063170	SL3.0ch02	35784400	35786400	+	1652	4440	1107	3380	27.118	24.671	-2.44626	0.00314878	-0.00912191	0.607102	1	1
Solyc02g063210	SL3.0ch02	35813730	35815730	-	1112	3326	654	2443	25.056	21.117	-3.93912	6.30592e-05	-5.12548e-15	-3.72598	1	1
Solyc02g063230	SL3.0ch02	35835956	35837956	+	5242	7931	5590	9148	39.794	37.929	-1.86435	0.00104993	3.95327	-2.60229	0.301803	0.97155
Solyc02g063250	SL3.0ch02	35848080	35850080	+	383	604	291	968	38.804	23.114	-15.6909	4.11503e-15	-0.525194	3.40635	0.286307	0.951048
Solyc02g063260	SL3.0ch02	35872033	35874033	-	15055	6650	15453	7316	69.362	67.869	-1.4933	0.000552523	-0.642379	1.01716	0.358976	1
Solyc02g063270	SL3.0ch02	35878605	35880605	-	7729	8113	8198	8964	48.788	47.768	-1.01971	0.033167	0.0346846	6.80791	0.897614	1
Solyc02g063290	SL3.0ch02	35905671	35907671	-	9046	8670	11137	11056	51.061	50.182	-0.878698	0.0411187	0.34019	2.81101	0.427948	1
Solyc02g063300	SL3.0ch02	35907841	35909841	+	1629	8353	1266	8436	16.319	13.049	-3.27052	2.13291e-10	-0.0691059	3.10274	0.855292	1
Solyc02g063350	SL3.0ch02	35958083	35960083	+	4297	5179	4605	5820	45.346	44.173	-1.17348	0.0485086	2.36667	2.5875	6.16804e-06	0.000436868
Solyc02g063360	SL3.0ch02	35982091	35984091	-	7279	9546	8645	11871	43.263	42.138	-1.12516	0.016157	0.79758	7.90169	0.0183831	0.19799
Solyc02g063370	SL3.0ch02	35982210	35984210	-	7473	9767	8816	12124	43.347	42.101	-1.24563	0.00872305	-5.12548e-15	-3.91086	1	1
Solyc02g063390	SL3.0ch02	36028613	36030613	+	5230	10175	5516	11292	33.95	32.818	-1.13231	0.0175013	0.395767	1.87272	0.585244	1
Solyc02g063430	SL3.0ch02	36068580	36070580	-	1272	8706	1029	8135	12.748	11.229	-1.51932	0.000924669	4.55609	1.31676	2.50516e-05	0.00136934
Solyc02g063490	SL3.0ch02	36116234	36118234	-	432	3333	484	4704	11.474	9.329	-2.14488	0.000761205	-0.432203	7.24856	0.130947	0.648354
Solyc02g063500	SL3.0ch02	36130354	36132354	+	3652	5962	3159	5707	37.986	35.63	-2.35577	0.000699984	-5.12548e-15	-3.91086	1	1
Solyc02g063546	SL3.0ch02	36208739	36210739	-	39	26	129	177	60	42.157	-17.8431	0.00583668	0.694695	2.38721	0.143187	0.679607
Solyc02g064550	SL3.0ch02	36242720	36244720	-	1628	4856	1665	6569	25.108	20.221	-4.88692	5.06313e-12	0.198915	4.75416	0.481654	1
Solyc02g064570	SL3.0ch02	36248298	36250298	-	3367	9434	3719	11186	26.303	24.951	-1.35127	0.00631517	2.61223	-3.8303	0.582189	1
Solyc02g064640	SL3.0ch02	36305406	36307406	-	4543	6043	4905	8138	42.915	37.606	-5.30879	5.47055e-16	1.92905	-3.16583	1	1
Solyc02g064650	SL3.0ch02	36305411	36307411	-	4565	6050	4925	8226	43.005	37.45	-5.55556	1.6989e-17	0.279998	0.308934	0.698279	1
Solyc02g064690	SL3.0ch02	36339740	36341740	-	5391	6268	4088	6652	46.239	38.063	-8.17564	5.03415e-34	-0.481303	5.90353	0.263707	0.914335
Solyc02g064710	SL3.0ch02	36389624	36391624	+	3948	6557	4506	8595	37.582	34.394	-3.18778	5.28656e-07	0.570996	0.321604	0.536226	1
Solyc02g064760	SL3.0ch02	36424023	36426023	+	5675	8160	5855	10446	41.019	35.918	-5.10111	6.51071e-19	-5.12548e-15	-3.91086	1	1
Solyc02g064765	SL3.0ch02	36425635	36427635	+	4856	6068	5090	6921	44.453	42.378	-2.07476	0.00113655	-5.12548e-15	-3.91086	1	1
Solyc02g064770	SL3.0ch02	36446337	36448337	+	3338	8947	3428	10292	27.171	24.985	-2.18592	5.69732e-05	1.37959	-0.204043	0.264351	0.915058
Solyc02g064790	SL3.0ch02	36467735	36469735	-	3721	12363	3857	13666	23.135	22.011	-1.12372	0.00844216	-5.12548e-15	-3.91086	1	1
Solyc02g064802	SL3.0ch02	36521415	36523415	-	192	63	2	218	75.294	0.909	-74.385	7.00861e-72	2.73226	-2.83897	0.578589	1
Solyc02g064804	SL3.0ch02	36522282	36524282	-	192	53	0	142	78.367	0	-78.3673	6.53652e-60	5.53218	-3.08174	0.0158534	0.178373
Solyc02g064810	SL3.0ch02	36522282	36524282	-	192	53	0	142	78.367	0	-78.3673	6.53652e-60	5.34822	-3.21676	0.0241306	0.237371
Solyc02g064830	SL3.0ch02	36526903	36528903	-	4086	7772	4391	9930	34.458	30.661	-3.79648	1.43944e-10	5.22383	2.77962	9.07726e-05	0.0036728
Solyc02g064840	SL3.0ch02	36535039	36537039	-	4268	4666	4521	6120	47.773	42.487	-5.28595	3.93621e-13	-5.12548e-15	-3.91086	1	1
Solyc02g064910	SL3.0ch02	36577004	36579004	+	8299	7202	9470	9076	53.538	51.062	-2.47626	5.84727e-06	-5.12548e-15	-3.91086	1	1
Solyc02g064920	SL3.0ch02	36585452	36587452	-	5088	4556	5758	5635	52.758	50.54	-2.21839	0.00101146	-5.12548e-15	-3.91086	1	1
Solyc02g064950	SL3.0ch02	36625852	36627852	-	9508	5538	7956	4872	63.193	62.021	-1.1723	0.023812	0.349903	5.67097	0.277038	0.935861
Solyc02g064955	SL3.0ch02	36616977	36618977	-	2840	6392	2298	5585	30.763	29.151	-1.61123	0.0126381	-5.12548e-15	-3.91086	1	1
Solyc02g064970	SL3.0ch02	36661162	36663162	+	3821	7484	3660	8602	33.799	29.848	-3.95089	1.72229e-10	0.567589	0.167922	0.598726	1
Solyc02g064990	SL3.0ch02	36690113	36692113	-	4734	9878	4187	9624	32.398	30.316	-2.08161	0.000139534	0.200856	3.65387	0.575825	1
Solyc02g065010	SL3.0ch02	36696445	36698445	+	2503	3132	2682	4136	44.419	39.337	-5.08176	1.76424e-08	0.0826523	0.792902	0.912134	1
Solyc02g065090	SL3.0ch02	36824038	36826038	+	522	1953	724	3264	21.091	18.154	-2.93645	0.00261575	4.43388	-3.60824	0.220116	0.83792
Solyc02g065140	SL3.0ch02	36860067	36862067	+	204	2961	87	1741	6.445	4.759	-1.6862	0.0086504	-5.12548e-15	-3.91086	1	1
Solyc02g065150	SL3.0ch02	36866808	36868808	+	4992	6546	5748	7961	43.266	41.929	-1.33707	0.0182583	4.74135	-3.17269	0.189417	0.781996
Solyc02g065160	SL3.0ch02	36890824	36892824	-	5094	7071	5891	9052	41.874	39.423	-2.45109	4.27983e-05	-5.12548e-15	-3.0055	1	1
Solyc02g065210	SL3.0ch02	36954260	36956260	-	3738	2778	3219	3266	57.366	49.638	-7.72886	4.97935e-18	-5.12548e-15	-3.91086	1	1
Solyc02g065240	SL3.0ch02	36982005	36984005	+	8673	9890	9218	11524	46.722	44.441	-2.28074	6.62653e-06	-1.00755	8.91435	0.119427	0.617204
Solyc02g065260	SL3.0ch02	37003004	37005004	+	4264	4835	2327	3860	46.862	37.611	-9.25117	7.83045e-29	-1.05629	6.40152	0.139368	0.669118
Solyc02g065290	SL3.0ch02	37017875	37019875	-	1039	4726	1174	5811	18.023	16.807	-1.21511	0.0378714	-2.34737	-0.471652	0.0182349	0.19675
Solyc02g065300	SL3.0ch02	37057038	37059038	+	5819	5808	6595	7810	50.047	45.783	-4.26459	1.89779e-11	-0.256813	7.39444	0.369018	1
Solyc02g065320	SL3.0ch02	37060876	37062876	+	128	481	19	178	21.018	9.645	-11.3734	0.000164617	-1.52975	-2.76245	0.481086	1
Solyc02g094758	SL3.0ch02	37061935	37063935	+	107	305	19	189	25.971	9.135	-16.8363	4.06324e-07	2.70255	-2.83909	0.669896	1
Solyc02g065340	SL3.0ch02	37071107	37073107	+	9031	9690	8914	10160	48.24	46.734	-1.50617	0.00233941	-5.12548e-15	-3.91086	1	1
Solyc02g065370	SL3.0ch02	37129832	37131832	-	2100	3826	1689	3567	35.437	32.135	-3.30235	0.00019381	-0.138018	6.49302	0.614781	1
Solyc02g065390	SL3.0ch02	37135876	37137876	+	2809	3520	4244	5634	44.383	42.964	-1.41884	0.0390425	2.06868	-0.728153	0.0421085	0.339544
Solyc02g065400	SL3.0ch02	37139473	37141473	+	8882	11580	9896	13920	43.407	41.552	-1.85539	7.54169e-05	-0.458016	7.61884	0.246716	0.88409
Solyc02g065430	SL3.0ch02	37155451	37157451	+	7831	8360	7521	8544	48.366	46.816	-1.55032	0.00348681	1.5237	2.87851	0.130894	0.648189
Solyc02g065460	SL3.0ch02	37176614	37178614	-	6763	7536	7283	8543	47.297	46.019	-1.2778	0.0153654	-5.12548e-15	-3.91086	1	1
Solyc02g065480	SL3.0ch02	37195506	37197506	-	5029	7050	5903	8680	41.634	40.479	-1.1556	0.0300257	2.57758	-2.3595	0.223	0.844407
Solyc02g065530	SL3.0ch02	37261476	37263476	-	5959	7684	5512	7801	43.678	41.403	-2.27494	0.000140719	4.44219	-0.362492	0.0566194	0.407313
Solyc02g065560	SL3.0ch02	37285760	37287760	+	2691	6436	2524	6852	29.484	26.92	-2.56415	9.5447e-05	0.855673	2.67908	0.0768066	0.486492
Solyc02g065620	SL3.0ch02	37356131	37358131	-	4721	3832	5571	5443	55.197	50.581	-4.61593	3.05835e-10	0.207204	3.82459	0.511445	1
Solyc02g065630	SL3.0ch02	37364095	37366095	-	7731	9618	7633	9995	44.562	43.3	-1.26122	0.0104444	-0.0714048	5.09915	0.795537	1
Solyc02g065640	SL3.0ch02	37364776	37366776	+	4634	8814	4160	9882	34.459	29.625	-4.83325	4.25686e-17	-5.12548e-15	-3.91086	1	1
Solyc02g065690	SL3.0ch02	37415302	37417302	+	8002	4416	7201	4381	64.439	62.174	-2.26465	0.000232123	-2.01276	-3.82595	1	1
Solyc02g065685	SL3.0ch02	37415302	37417302	+	8002	4416	7201	4381	64.439	62.174	-2.26465	0.000232123	-1.17555	-0.0317302	0.0785316	0.493312
Solyc02g065700	SL3.0ch02	37424335	37426335	-	4846	9481	4409	10405	33.824	29.762	-4.06186	2.99034e-13	-5.12548e-15	-3.91086	1	1
Solyc02g065770	SL3.0ch02	37483994	37485994	-	10858	11768	12547	14191	47.989	46.926	-1.06332	0.0109412	1.31971	6.69372	0.00935037	0.122822
Solyc02g066830	SL3.0ch02	37545133	37547133	+	1189	5108	718	5389	18.882	11.757	-7.12501	2.40986e-27	-0.998694	3.9194	0.0127633	0.153139
Solyc02g066910	SL3.0ch02	37735298	37737298	+	6130	9973	7127	12613	38.067	36.104	-1.96308	0.000113664	0.115538	5.25977	0.67666	1
Solyc02g066940	SL3.0ch02	37762236	37764236	-	7183	4792	6690	6120	59.983	52.225	-7.75847	1.3578e-33	-0.809672	5.711	0.0126546	0.152583
Solyc02g066960	SL3.0ch02	37778692	37780692	+	967	1553	410	1024	38.373	28.591	-9.78166	9.55988e-10	1.80101	-3.21994	1	1
Solyc02g066970	SL3.0ch02	37788381	37790381	-	11693	6224	12871	7374	65.262	63.576	-1.68585	0.000475463	1.85487	-2.8087	1	1
Solyc02g067000	SL3.0ch02	37816737	37818737	-	7794	4582	8807	5819	62.977	60.215	-2.76204	3.91738e-06	-1.59273	-1.75553	0.378069	1
Solyc02g067005	SL3.0ch02	37816584	37818584	-	7795	4786	8809	6077	61.959	59.176	-2.7821	3.12099e-06	-5.12548e-15	-3.91086	1	1
Solyc02g067080	SL3.0ch02	37878724	37880724	-	5959	4734	5568	4921	55.728	53.084	-2.64386	0.00010441	0.437442	6.36888	0.14369	0.68084
Solyc02g067090	SL3.0ch02	37885398	37887398	+	4593	3879	5380	4954	54.214	52.061	-2.15272	0.00226251	0.119793	3.48972	0.797881	1
Solyc02g067105	SL3.0ch02	37901025	37903025	+	4779	5874	3942	6365	44.861	38.246	-6.61475	1.67183e-21	0.138693	1.24329	0.821429	1
Solyc02g067220	SL3.0ch02	37975646	37977646	-	1853	9287	1500	9623	16.634	13.486	-3.14818	1.1564e-10	-1.29416	-1.83221	0.468686	1
Solyc10g077150	SL3.0ch02	37997209	37999209	+	1860	4596	1897	5338	28.81	26.22	-2.59064	0.000563912	-5.12548e-15	-3.91086	1	1
Solyc02g067260	SL3.0ch02	38019685	38021685	-	1839	4602	1702	4671	28.551	26.706	-1.84505	0.011499	-1.07532	0.375637	0.0683096	0.455754
Solyc02g067270	SL3.0ch02	38019685	38021685	-	1839	4602	1702	4671	28.551	26.706	-1.84505	0.011499	-5.12548e-15	-3.91086	1	1
Solyc02g067310	SL3.0ch02	38060050	38062050	+	4647	9093	4727	10509	33.821	31.025	-2.79576	5.27596e-07	-5.12548e-15	-3.06724	1	1
Solyc02g067320	SL3.0ch02	38095466	38097466	-	2871	5531	2335	5264	34.17	30.728	-3.44271	4.1616e-06	-2.75333	1.06711	0.539134	1
Solyc02g067330	SL3.0ch02	38095466	38097466	-	2871	5531	2335	5264	34.17	30.728	-3.44271	4.1616e-06	-5.12548e-15	-3.91086	1	1
Solyc02g067340	SL3.0ch02	38111481	38113481	-	5690	5387	6207	6163	51.368	50.178	-1.18985	0.0354905	0.427741	1.50185	0.601657	1
Solyc02g067420	SL3.0ch02	38177052	38179052	-	4661	11135	4972	12915	29.507	27.797	-1.71075	0.000431612	0.424651	5.27385	0.133898	0.655157
Solyc02g067430	SL3.0ch02	38183476	38185476	-	3739	4381	3720	5238	46.047	41.527	-4.51967	5.2528e-09	-5.12548e-15	-3.91086	1	1
Solyc02g067460	SL3.0ch02	38224855	38226855	+	4152	10285	3803	10465	28.759	26.654	-2.10539	6.2478e-05	0.739607	6.93118	0.0180618	0.195118
Solyc02g067470	SL3.0ch02	38233291	38235291	-	1870	9260	1416	7762	16.801	15.428	-1.37324	0.00519607	0.359673	4.25637	0.288738	0.95449
Solyc02g067490	SL3.0ch02	38250379	38252379	-	5621	9233	5109	9990	37.842	33.837	-4.00498	1.42486e-12	0.370697	2.43424	0.641149	1
Solyc02g067510	SL3.0ch02	38252770	38254770	+	5831	9204	6123	10696	38.783	36.405	-2.37758	1.29644e-05	1.7824	-1.14196	0.0985668	0.556605
Solyc02g067550	SL3.0ch02	38273104	38275104	+	15	101	10	516	12.931	1.901	-11.0299	2.44899e-06	-1.20077	-0.302998	0.196069	0.795397
Solyc02g067570	SL3.0ch02	38287327	38289327	+	4655	7590	4205	7623	38.016	35.551	-2.46428	6.92169e-05	-0.327327	5.90194	0.273275	0.930286
Solyc02g067590	SL3.0ch02	38308749	38310749	+	4056	8906	3414	8954	31.291	27.603	-3.68797	2.77108e-10	1.95982	-3.51511	1	1
Solyc02g067610	SL3.0ch02	38314482	38316482	+	4027	7305	3682	7282	35.537	33.583	-1.9539	0.00157775	7.68018	1.50276	4.03356e-10	1.55132e-07
Solyc02g067620	SL3.0ch02	38321925	38323925	-	1683	5205	1962	6941	24.434	22.038	-2.39628	0.000341708	-0.350445	4.40241	0.295896	0.964073
Solyc02g067640	SL3.0ch02	38335383	38337383	+	692	1444	908	2124	32.397	29.947	-2.44977	0.0324105	4.43388	-3.60824	0.220058	0.837788
Solyc02g067650	SL3.0ch02	38343515	38345515	+	2844	8835	2608	9162	24.351	22.158	-2.19337	6.48276e-05	1.8091	-3.87049	1	1
Solyc02g067660	SL3.0ch02	38365940	38367940	-	6240	4996	6856	5758	55.536	54.352	-1.18347	0.0350213	1.60003	3.68624	0.0339161	0.295736
Solyc02g067690	SL3.0ch02	38386602	38388602	-	2729	7378	1340	7563	27.001	15.051	-11.95	2.89573e-89	1.32873	6.19005	0.0001487	0.00541645
Solyc02g067740	SL3.0ch02	38429388	38431388	-	101	756	67	841	11.785	7.379	-4.40644	0.00140548	0.199926	4.23866	0.51074	1
Solyc02g067760	SL3.0ch02	38447614	38449614	-	2425	5539	2118	5498	30.45	27.81	-2.63965	0.000247254	-5.12548e-15	-3.86883	1	1
Solyc02g067810	SL3.0ch02	38490263	38492263	+	999	9583	731	10339	9.441	6.603	-2.83713	4.76777e-14	0.198718	0.00787978	0.898989	1
Solyc02g067860	SL3.0ch02	38528363	38530363	+	1840	6586	2551	9729	21.837	20.774	-1.06356	0.0343738	0.2182	5.95759	0.414769	1
Solyc02g067890	SL3.0ch02	38551720	38553720	-	3375	8564	2353	7856	28.269	23.048	-5.22041	4.0105e-18	-0.566541	5.38087	0.0615349	0.427541
Solyc02g068020	SL3.0ch02	38642601	38644601	+	3541	9975	3530	12051	26.199	22.656	-3.54278	5.76437e-12	-5.12548e-15	-3.91086	1	1
Solyc02g068060	SL3.0ch02	38672727	38674727	+	3212	7575	3180	8717	29.777	26.729	-3.04716	4.88574e-07	-2.74817	-0.446282	0.0677112	0.453284
Solyc02g068160	SL3.0ch02	38762290	38764290	-	4599	6630	3491	6761	40.956	34.052	-6.90456	1.40104e-24	3.79641	-1.96967	0.138035	0.665574
Solyc02g068200	SL3.0ch02	38783585	38785585	+	1690	8936	1445	9161	15.904	13.624	-2.28002	3.28021e-06	0.127608	6.29205	0.658716	1
Solyc02g068260	SL3.0ch02	38815561	38817561	-	12	80	54	742	13.043	6.784	-6.25956	0.0289316	-1.07456	1.749	0.0483067	0.369828
Solyc02g068300	SL3.0ch02	38847956	38849956	+	1081	4615	1123	6759	18.978	14.248	-4.73058	7.00555e-13	0.377485	3.70146	0.40724	1
Solyc02g068310	SL3.0ch02	38857144	38859144	-	5380	11002	6283	13837	32.841	31.228	-1.61329	0.000767367	-0.520961	5.8809	0.125961	0.634313
Solyc02g068330	SL3.0ch02	38867132	38869132	-	47	462	25	537	9.234	4.448	-4.78539	0.00149061	-1.47359	-1.10971	0.0949157	0.544926
Solyc02g068340	SL3.0ch02	38877131	38879131	-	5751	8355	6155	9779	40.77	38.628	-2.14179	0.000134816	-0.805188	4.04073	0.089104	0.526441
Solyc02g068370	SL3.0ch02	38890071	38892071	+	3262	4008	3281	5013	44.869	39.559	-5.31061	5.10944e-11	-0.623452	4.62995	0.0614572	0.427167
Solyc02g068380	SL3.0ch02	38904693	38906693	-	4557	10207	3941	11493	30.866	25.535	-5.33108	5.75572e-24	-0.293724	7.37903	0.25571	0.901426
Solyc02g068390	SL3.0ch02	38907030	38909030	+	2065	10228	2109	11616	16.798	15.366	-1.43206	0.00125459	0.686711	3.80308	0.0486698	0.371177
Solyc02g068410	SL3.0ch02	38925905	38927905	+	8651	9564	9762	11393	47.494	46.145	-1.3487	0.00475962	-1.74804	-3.79669	1	1
Solyc02g068510	SL3.0ch02	39035665	39037665	-	6990	8389	6754	8722	45.452	43.642	-1.80982	0.00101882	-5.12548e-15	-3.91086	1	1
Solyc02g068560	SL3.0ch02	39097943	39099943	-	1370	6800	1181	6866	16.769	14.676	-2.09239	0.000221184	-0.055758	5.09705	0.871447	1
Solyc02g068565	SL3.0ch02	39098348	39100348	-	1348	7353	1204	8471	15.492	12.444	-3.04803	4.93165e-09	-5.12548e-15	-3.87079	1	1
Solyc02g068590	SL3.0ch02	39121635	39123635	-	10508	8820	11623	10411	54.367	52.75	-1.61643	0.000776932	0.130576	6.60579	0.700548	1
Solyc02g068620	SL3.0ch02	39157211	39159211	-	1431	3984	1425	6218	26.427	18.645	-7.78208	5.52883e-25	-5.12548e-15	-2.14673	1	1
Solyc02g068630	SL3.0ch02	39156637	39158637	+	1473	4063	1644	6489	26.608	20.214	-6.39372	1.65172e-17	-0.196281	0.32389	0.785818	1
Solyc02g068650	SL3.0ch02	39173820	39175820	-	11310	9671	9667	8735	53.906	52.532	-1.37358	0.00416695	0.0646214	4.16827	0.845226	1
Solyc02g068660	SL3.0ch02	39182076	39184076	-	5383	8539	4191	7624	38.665	35.472	-3.19356	1.81423e-07	4.99235	-1.31063	0.04153	0.336835
Solyc02g068680	SL3.0ch02	39190314	39192314	+	4075	8134	4621	10055	33.377	31.487	-1.89024	0.000760978	5.71481	5.02217	1.93785e-07	2.76975e-05
Solyc02g068730	SL3.0ch02	39238683	39240683	-	5047	4254	5373	4797	54.263	52.832	-1.43112	0.0244899	-0.390368	4.35417	0.216345	0.831415
Solyc02g068890	SL3.0ch02	39337532	39339532	+	5286	8609	4985	8586	38.042	36.733	-1.30972	0.0145442	-1.78797	1.14299	0.0137129	0.161025
Solyc02g068895	SL3.0ch02	39340770	39342770	+	79	938	28	504	7.768	5.263	-2.50479	0.0371971	-0.673072	0.386419	0.36725	1
Solyc02g068900	SL3.0ch02	39343794	39345794	+	1537	2195	1219	2187	41.184	35.79	-5.39457	3.42189e-06	0.45113	6.04203	0.0926872	0.537865
Solyc02g068960	SL3.0ch02	39406565	39408565	-	2384	6870	1851	6809	25.762	21.374	-4.3877	1.26831e-11	-5.12548e-15	-3.91086	1	1
Solyc02g068980	SL3.0ch02	39490519	39492519	-	1679	4424	1848	5688	27.511	24.522	-2.98877	7.02017e-05	1.81517	-3.45016	1	1
Solyc02g069000	SL3.0ch02	39525479	39527479	-	2332	9515	2570	11484	19.684	18.287	-1.3977	0.00291286	-5.12548e-15	-3.91086	1	1
Solyc02g069010	SL3.0ch02	39525978	39527978	+	5248	8536	5735	10180	38.073	36.035	-2.03794	0.000236525	0.128125	5.44436	0.665988	1
Solyc02g069070	SL3.0ch02	39611427	39613427	-	1386	3450	992	3296	28.66	23.134	-5.52572	3.55116e-09	0.863404	2.18578	0.108331	0.586659
Solyc02g069100	SL3.0ch02	39635305	39637305	-	1217	5697	1239	6238	17.602	16.571	-1.03115	0.0498448	0.0668688	8.34985	0.827127	1
Solyc02g069190	SL3.0ch02	39720724	39722724	+	4363	6122	4293	6418	41.612	40.08	-1.53154	0.0135091	-5.12548e-15	-3.91086	1	1
Solyc02g069200	SL3.0ch02	39728090	39730090	-	832	4846	568	3899	14.653	12.715	-1.93758	0.00324783	3.50246	-3.75208	0.399629	1
Solyc02g069320	SL3.0ch02	39817391	39819391	-	2713	7345	2791	8576	26.974	24.554	-2.42002	4.95787e-05	-0.816142	1.9529	0.117457	0.611757
Solyc02g069340	SL3.0ch02	39822342	39824342	+	2494	9215	2064	8364	21.3	19.793	-1.50699	0.00372046	0.651156	4.92753	0.0305011	0.276054
Solyc02g069350	SL3.0ch02	39838562	39840562	+	616	2177	343	1510	22.055	18.511	-3.54461	0.00234913	0.76196	1.68638	0.178715	0.760894
Solyc02g069360	SL3.0ch02	39844377	39846377	+	760	3819	176	1948	16.598	8.286	-8.31126	1.81984e-20	-5.12548e-15	-3.91086	1	1
Solyc02g069390	SL3.0ch02	39870209	39872209	-	7153	9120	8391	11199	43.956	42.833	-1.12317	0.0184252	-2.58453	-2.81666	0.205708	0.811789
Solyc02g069440	SL3.0ch02	39900567	39902567	+	6875	10097	7955	12390	40.508	39.101	-1.40738	0.00374235	5.39872	-3.13672	0.0753803	0.482053
Solyc02g069455	SL3.0ch02	39903794	39905794	+	1454	3577	1574	4329	28.901	26.664	-2.23641	0.00589831	-1.75559	-1.50639	0.213766	0.826923
Solyc02g069470	SL3.0ch02	39914856	39916856	-	4151	8836	4940	11203	31.963	30.601	-1.36123	0.00792983	0.26823	4.95653	0.404768	1
Solyc02g069480	SL3.0ch02	39921926	39923926	-	1889	7238	1577	7549	20.697	17.28	-3.41654	7.39799e-09	-5.12548e-15	-3.91086	1	1
Solyc02g069500	SL3.0ch02	39946071	39948071	+	8304	6834	8147	7408	54.855	52.375	-2.47989	1.41102e-05	-0.691482	1.25493	0.226991	0.850021
Solyc02g069543	SL3.0ch02	39973191	39975191	-	437	3724	244	3125	10.502	7.243	-3.25978	1.18938e-06	-5.12548e-15	-3.87283	1	1
Solyc02g069560	SL3.0ch02	39979765	39981765	-	3242	5086	3702	6829	38.929	35.153	-3.77556	1.46331e-07	-5.12548e-15	-1.32587	1	1
Solyc02g069590	SL3.0ch02	40009354	40011354	-	4064	5408	4556	6423	42.905	41.497	-1.408	0.022881	0.269688	6.41779	0.331639	1
Solyc02g069600	SL3.0ch02	40013734	40015734	-	4669	7897	4344	8239	37.156	34.523	-2.63305	1.39464e-05	-4.96456	-1.55705	0.0392026	0.323737
Solyc02g069610	SL3.0ch02	40018807	40020807	+	4098	10338	4596	12423	28.387	27.005	-1.38225	0.00419767	0.0621711	5.85561	0.827576	1
Solyc02g069640	SL3.0ch02	40048981	40050981	-	4321	3564	5660	5090	54.8	52.651	-2.14909	0.00252945	0.015062	6.61082	0.955025	1
Solyc02g069650	SL3.0ch02	40063791	40065791	-	29	702	2	424	3.967	0.469	-3.49768	0.000165389	-0.238577	4.72538	0.410891	1
Solyc02g069770	SL3.0ch02	40153459	40155459	+	6535	5322	6902	6154	55.115	52.865	-2.25054	0.000310617	0.00773006	3.70471	0.990403	1
Solyc02g069810	SL3.0ch02	40212323	40214323	-	16	165	0	90	8.84	0	-8.83978	0.00127137	-2.01003	2.63556	0.000839861	0.0205895
Solyc02g069880	SL3.0ch02	40256167	40258167	-	82	1086	54	1114	7.021	4.623	-2.39726	0.00990164	-0.503318	4.11964	0.10534	0.57824
Solyc02g069890	SL3.0ch02	40254860	40256860	+	200	3000	144	3171	6.25	4.344	-1.90611	0.000457564	-5.12548e-15	-3.91086	1	1
Solyc02g069925	SL3.0ch02	40271484	40273484	+	254	2488	215	3309	9.263	6.101	-3.16229	3.6306e-06	-0.982779	1.3642	0.101098	0.565186
Solyc02g069935	SL3.0ch02	40281942	40283942	-	281	3080	219	3287	8.361	6.246	-2.11417	0.000619523	-2.21534	1.04376	5.22507e-05	0.00242715
Solyc02g069950	SL3.0ch02	40295935	40297935	+	5301	11512	4190	12411	31.529	25.239	-6.28973	5.2411e-36	0.0344283	7.20474	0.889584	1
Solyc02g069960	SL3.0ch02	40308744	40310744	-	4842	5996	3708	4907	44.676	43.041	-1.63493	0.0133626	1.84935	-3.76056	1	1
Solyc02g069970	SL3.0ch02	40330154	40332154	-	684	3068	594	3278	18.23	15.341	-2.88937	0.000570616	0.402506	-0.296448	0.630833	1
Solyc02g069980	SL3.0ch02	40338259	40340259	-	208	2336	237	3340	8.176	6.626	-1.55044	0.0139945	-0.655396	3.68166	0.0731048	0.473528
Solyc02g070020	SL3.0ch02	40379067	40381067	-	1219	11429	1457	15048	9.638	8.828	-0.810259	0.0108893	-0.226414	8.45392	0.71117	1
Solyc02g070040	SL3.0ch02	40399824	40401824	-	111	615	47	580	15.289	7.496	-7.79324	9.25967e-06	2.4352	5.56717	6.78838e-07	7.54058e-05
Solyc02g070060	SL3.0ch02	40470758	40472758	-	7085	6126	6940	6475	53.63	51.733	-1.89642	0.00140822	-5.20369	-3.33336	0.0467509	0.363282
Solyc02g070070	SL3.0ch02	40474351	40476351	-	6971	8895	7382	9825	43.937	42.901	-1.03558	0.030858	-5.12548e-15	-1.14986	1	1
Solyc02g070080	SL3.0ch02	40486838	40488838	+	5163	5374	6726	7552	48.999	47.107	-1.89133	0.00221649	-5.12548e-15	-3.87151	1	1
Solyc02g070180	SL3.0ch02	40533267	40535267	-	7947	8187	8183	9567	49.256	46.101	-3.15482	1.07897e-08	2.87846	-0.567037	0.124018	0.629813
Solyc02g070140	SL3.0ch02	40521578	40523578	+	9899	7418	11026	8607	57.163	56.161	-1.00293	0.0279707	-5.12548e-15	-3.91086	1	1
Solyc02g070170	SL3.0ch02	40526236	40528236	+	3096	6104	2824	6839	33.652	29.225	-4.4273	1.2855e-10	-5.12548e-15	-3.79652	1	1
Solyc02g070250	SL3.0ch02	40579104	40581104	-	9365	7531	10524	8856	55.427	54.303	-1.12391	0.0181639	-0.168691	4.68829	0.578778	1
Solyc02g070280	SL3.0ch02	40628208	40630208	-	12022	8327	13417	9727	59.079	57.972	-1.10724	0.0115073	0.628445	2.11074	0.372216	1
Solyc02g070310	SL3.0ch02	40662617	40664617	-	3471	7527	2288	7540	31.56	23.28	-8.27986	1.87839e-39	0.370644	9.35392	0.219008	0.836018
Solyc02g070393	SL3.0ch02	40686864	40688864	-	37	139	65	549	21.023	10.586	-10.4364	0.000411527	-5.12548e-15	-3.91086	1	1
Solyc02g070400	SL3.0ch02	40704570	40706570	-	7161	6863	7809	8415	51.062	48.132	-2.93007	5.13176e-07	-0.108719	4.59717	0.702635	1
Solyc06g043280	SL3.0ch02	40705462	40707462	-	2420	3363	3142	5046	41.847	38.373	-3.47356	3.59214e-05	-5.12548e-15	-3.91086	1	1
Solyc02g070410	SL3.0ch02	40703921	40705921	+	6960	5301	7385	6653	56.765	52.607	-4.15814	3.38725e-11	1.82161	-2.88744	1	1
Solyc02g070450	SL3.0ch02	40754842	40756842	-	3492	8149	4119	10891	29.997	27.442	-2.55572	5.52044e-06	-3.67168	-0.0714167	0.195899	0.795171
Solyc02g070487	SL3.0ch02	40794850	40796850	-	2266	8671	2049	8982	20.719	18.575	-2.14374	6.03756e-05	-1.42932	-1.83012	0.140831	0.67327
Solyc02g070510	SL3.0ch02	40803104	40805104	+	4585	9921	4382	10825	31.608	28.816	-2.79193	2.29255e-07	0.0803408	6.6353	0.779241	1
Solyc02g070530	SL3.0ch02	40832408	40834408	-	2074	3778	2148	5029	35.441	29.929	-5.51194	6.03944e-11	1.12713	0.207504	0.311698	0.985923
Solyc02g070560	SL3.0ch02	40864406	40866406	+	423	3813	531	5929	9.986	8.22	-1.76602	0.00142723	0.101213	4.55935	0.73834	1
Solyc02g070630	SL3.0ch02	40891683	40893683	+	1914	1575	2274	2333	54.858	49.36	-5.49846	1.2142e-06	-0.162505	6.60103	0.527786	1
Solyc02g070770	SL3.0ch02	40953974	40955974	-	1454	3830	1289	4349	27.517	22.863	-4.65432	3.56887e-08	0.449158	5.58159	0.138963	0.66825
Solyc02g070800	SL3.0ch02	40975015	40977015	-	140	278	278	737	33.493	27.389	-6.10366	0.0124289	2.60544	-0.0859586	0.000709733	0.0182763
Solyc02g070820	SL3.0ch02	40991455	40993455	-	782	5368	650	4915	12.715	11.68	-1.0353	0.0451151	1.66081	-0.50113	0.0532622	0.39299
Solyc02g070860	SL3.0ch02	41020238	41022238	+	10574	6399	11628	7367	62.299	61.216	-1.08284	0.0193398	-0.131308	3.68135	0.688175	1
Solyc02g070870	SL3.0ch02	41039917	41041917	-	6747	10205	6932	11309	39.801	38.002	-1.79831	0.000443901	-0.126005	2.29353	0.772664	1
Solyc02g070920	SL3.0ch02	41070017	41072017	-	556	290	680	1338	65.721	33.697	-32.0243	1.53045e-54	0.438998	-1.18514	0.72329	1
Solyc02g070915	SL3.0ch02	41069453	41071453	-	636	867	770	1664	42.315	31.635	-10.6802	3.3871e-11	-5.12548e-15	-3.91086	1	1
Solyc02g070940	SL3.0ch02	41068955	41070955	+	636	867	770	1696	42.315	31.225	-11.0907	4.46622e-12	-0.251845	4.26419	0.695757	1
Solyc02g070970	SL3.0ch02	41078368	41080368	+	1929	5964	1930	6587	24.439	22.661	-1.77882	0.0047968	-3.671	-0.314039	0.0491012	0.373115
Solyc02g071000	SL3.0ch02	41085549	41087549	+	102	1865	47	1399	5.186	3.25	-1.93522	0.0042096	-4.98504	-0.910736	0.0379835	0.317874
Solyc02g071040	SL3.0ch02	41104964	41106964	-	8056	8195	8123	8583	49.572	48.623	-0.949085	0.0430609	0.449254	5.63624	0.183318	0.770767
Solyc02g071060	SL3.0ch02	41119078	41121078	-	3165	7720	2693	7949	29.077	25.305	-3.77132	1.06693e-09	-1.66144	0.997371	0.0287072	0.266342
Solyc02g071100	SL3.0ch02	41152758	41154758	-	5133	9108	5066	10241	36.044	33.096	-2.94785	1.514e-07	-0.756095	3.20226	0.179716	0.762736
Solyc02g071130	SL3.0ch02	41180342	41182342	-	874	7949	745	8182	9.906	8.345	-1.56046	0.000261381	2.05934	0.58249	0.189468	0.781996
Solyc02g071160	SL3.0ch02	41219245	41221245	+	6932	8257	6407	8354	45.638	43.405	-2.23337	9.17903e-05	0.130306	4.41702	0.691151	1
Solyc02g071220	SL3.0ch02	41261898	41263898	-	5283	10430	5746	12214	33.622	31.993	-1.62852	0.00112163	0.669863	4.5539	0.196326	0.795895
Solyc02g071240	SL3.0ch02	41266085	41268085	+	6052	10870	7035	13189	35.764	34.785	-0.978691	0.0264135	-0.561099	3.21896	0.163675	0.727092
Solyc02g071260	SL3.0ch02	41311226	41313226	+	5247	5938	4431	6002	46.911	42.471	-4.44004	1.20583e-10	0.438833	3.16786	0.380252	1
Solyc02g071330	SL3.0ch02	41373197	41375197	+	7348	8628	7760	9803	45.994	44.184	-1.8102	0.000685122	-0.176708	5.59488	0.481003	1
Solyc02g071340	SL3.0ch02	41386051	41388051	+	1743	6234	1525	8707	21.85	14.904	-6.9461	2.43319e-32	-5.12548e-15	-3.79436	1	1
Solyc02g071370	SL3.0ch02	41411225	41413225	-	1313	1851	860	2259	41.498	27.573	-13.9252	3.95369e-30	-5.12548e-15	-3.91086	1	1
Solyc02g071380	SL3.0ch02	41425503	41427503	-	4385	4716	5387	7187	48.182	42.842	-5.33915	2.28261e-14	1.4705	-1.50219	0.284274	0.947749
Solyc02g071470	SL3.0ch02	41463944	41465944	-	196	351	11	529	35.832	2.037	-33.7948	1.32251e-51	-5.12548e-15	-3.91086	1	1
Solyc02g071475	SL3.0ch02	41468731	41470731	-	808	1541	878	2277	34.398	27.829	-6.56877	2.65283e-07	5.0551	0.130541	0.00204641	0.0409144
Solyc02g071530	SL3.0ch02	41489069	41491069	+	2932	9838	2906	10384	22.96	21.866	-1.094	0.0192368	2.55304	0.00502131	0.0296751	0.270839
Solyc02g071540	SL3.0ch02	41504918	41506918	-	7162	7226	7576	8758	49.778	46.382	-3.39581	5.05343e-09	-5.12548e-15	-3.17843	1	1
Solyc02g071560	SL3.0ch02	41537474	41539474	-	2014	6858	2150	8076	22.701	21.025	-1.67579	0.00342567	7.50826	-0.605532	0.00853862	0.114428
Solyc02g071595	SL3.0ch02	41567203	41569203	-	829	1949	360	1897	29.842	15.95	-13.8912	2.07271e-30	-5.12548e-15	-3.87428	1	1
Solyc02g071620	SL3.0ch02	41582587	41584587	+	2468	4136	2295	4284	37.371	34.884	-2.48757	0.00213955	3.51163	3.60595	1.12527e-05	0.000716169
Solyc02g071630	SL3.0ch02	41586073	41588073	+	4679	5856	4541	7792	44.414	36.82	-7.59394	2.41837e-30	-3.40809	-3.78221	0.411397	1
Solyc02g071640	SL3.0ch02	41587777	41589777	+	48	800	74	1712	5.66	4.143	-1.51704	0.0457369	-0.35968	1.21575	0.471869	1
Solyc02g071760	SL3.0ch02	41693593	41695593	-	247	1290	137	1479	16.07	8.478	-7.59254	1.47534e-10	3.78281	-0.325491	0.0108799	0.137263
Solyc02g071770	SL3.0ch02	41696040	41698040	-	232	1065	152	1019	17.887	12.98	-4.90707	0.000636903	0.612372	4.48738	0.210679	0.820867
Solyc02g071840	SL3.0ch02	41773439	41775439	-	454	368	65	158	55.231	29.148	-26.0832	9.33604e-12	-5.12548e-15	-3.91086	1	1
Solyc02g071910	SL3.0ch02	41846045	41848045	-	1790	3016	1219	4345	37.245	21.909	-15.3364	2.48033e-64	1.81104	-3.82954	1	1
Solyc02g071930	SL3.0ch02	41860700	41862700	+	8318	6610	9174	7600	55.721	54.692	-1.02901	0.0344762	-5.12548e-15	-2.1415	1	1
Solyc02g071940	SL3.0ch02	41866003	41868003	-	1871	5336	1734	6153	25.961	21.986	-3.97533	1.77595e-08	0.718016	2.41931	0.130298	0.646172
Solyc02g071950	SL3.0ch02	41865288	41867288	+	1746	4685	1616	5356	27.15	23.178	-3.97132	1.7534e-07	-5.12548e-15	-3.91086	1	1
Solyc02g072090	SL3.0ch02	41941119	41943119	-	5381	10141	5976	11887	34.667	33.455	-1.2123	0.0115919	-0.117754	2.28724	0.809785	1
Solyc02g072180	SL3.0ch02	42062604	42064604	+	2911	5189	3183	6639	35.938	32.407	-3.53143	8.98911e-07	0.764253	3.32634	0.122349	0.625283
Solyc02g072200	SL3.0ch02	42081894	42083894	+	8787	7714	9058	8322	53.251	52.117	-1.13394	0.0205945	-5.12548e-15	-3.91086	1	1
Solyc02g072220	SL3.0ch02	42095833	42097833	+	1053	4485	991	5899	19.014	14.383	-4.63092	1.30059e-11	5.70069	1.1805	2.03166e-05	0.00115051
Solyc02g072240	SL3.0ch02	42115171	42117171	+	110	1474	56	1413	6.944	3.812	-3.13233	0.000137362	-4.09708	-2.55128	0.178867	0.761362
Solyc02g072310	SL3.0ch02	42160428	42162428	+	1851	2729	1107	2243	40.415	33.045	-7.37007	4.69862e-11	-0.823029	-2.36219	0.735033	1
Solyc02g072340	SL3.0ch02	42173195	42175195	-	1290	3581	649	2223	26.483	22.597	-3.88578	0.000124701	-5.77149	-2.18759	0.000151788	0.00548398
Solyc02g072350	SL3.0ch02	42174619	42176619	-	2278	5204	1469	5012	30.446	22.666	-7.78015	2.67192e-24	-5.38275	-2.46404	6.1245e-05	0.00273826
Solyc02g072393	SL3.0ch02	42187199	42189199	-	9410	8709	9210	9406	51.934	49.474	-2.46086	2.9348e-06	-1.97214	-3.08825	1	1
Solyc02g072410	SL3.0ch02	42192396	42194396	-	786	2861	1027	4161	21.552	19.796	-1.75628	0.0241153	1.93074	-3.69481	1	1
Solyc02g072440	SL3.0ch02	42202321	42204321	+	959	5107	806	5608	15.809	12.566	-3.24317	2.80896e-07	-0.228505	3.09537	0.676469	1
Solyc02g072443	SL3.0ch02	42207813	42209813	-	2155	6704	1878	7150	24.326	20.802	-3.5236	2.73295e-08	-5.12548e-15	-3.28582	1	1
Solyc02g072510	SL3.0ch02	42266277	42268277	-	7242	7880	7929	9902	47.89	44.468	-3.42299	1.029e-09	-0.416825	4.43489	0.155435	0.710024
Solyc02g072520	SL3.0ch02	42275049	42277049	-	10486	6842	11746	8198	60.515	58.895	-1.61987	0.00108766	0.696971	4.15798	0.0627518	0.432885
Solyc02g072540	SL3.0ch02	42299510	42301510	-	579	1436	214	906	28.734	19.107	-9.62735	3.29425e-09	-5.12548e-15	-3.65227	1	1
Solyc02g072570	SL3.0ch02	42303556	42305556	-	2192	5991	2304	7474	26.787	23.563	-3.22414	9.52111e-07	-5.12548e-15	-2.2336	1	1
Solyc02g073574	SL3.0ch02	42323920	42325920	+	10	20	95	580	33.333	14.074	-19.2593	0.00493368	-0.821767	2.11322	0.10153	0.566364
Solyc02g075610	SL3.0ch02	42336124	42338124	+	5208	7836	3506	5615	39.926	38.439	-1.48764	0.014921	-1.18655	6.40498	5.98914e-06	0.000426732
Solyc02g075615	SL3.0ch02	42340043	42342043	+	501	5264	424	5108	8.69	7.664	-1.02588	0.0267564	-1.19298	4.60628	0.000147818	0.0054061
Solyc02g075625	SL3.0ch02	42356056	42358056	-	3267	6368	2975	6869	33.908	30.221	-3.68617	5.7866e-08	-5.12548e-15	-3.91086	1	1
Solyc02g076630	SL3.0ch02	42353718	42355718	+	1609	5364	1594	5933	23.075	21.177	-1.89762	0.00392461	-5.12548e-15	-3.91086	1	1
Solyc02g076680	SL3.0ch02	42395710	42397710	-	1152	5213	1113	5812	18.099	16.072	-2.02678	0.00140318	-1.90586	3.60372	4.782e-05	0.0022565
Solyc02g076770	SL3.0ch02	42439301	42441301	-	1319	8252	1167	8755	13.781	11.762	-2.01947	2.51697e-05	4.58858	-3.54465	0.108173	0.58619
Solyc02g076800	SL3.0ch02	42478780	42480780	+	831	2931	481	2902	22.089	14.218	-7.87116	2.91408e-17	-1.11607	5.2925	0.00540823	0.0832417
Solyc02g076855	SL3.0ch02	42547633	42549633	-	2433	7667	2070	7388	24.089	21.886	-2.20288	0.000215021	-5.12548e-15	-3.91086	1	1
Solyc02g076860	SL3.0ch02	42550568	42552568	-	493	4962	169	4858	9.038	3.362	-5.67573	5.67107e-33	-1.63461	-2.70117	0.136548	0.662809
Solyc02g076880	SL3.0ch02	42565054	42567054	-	1256	2517	1268	3826	33.289	24.892	-8.39713	2.82733e-17	-5.12548e-15	-3.91086	1	1
Solyc02g076890	SL3.0ch02	42571801	42573801	+	8921	4732	8026	4900	65.341	62.092	-3.24904	5.65861e-08	-5.12548e-15	-3.91086	1	1
Solyc02g076930	SL3.0ch02	42603698	42605698	+	1263	5545	905	5145	18.552	14.959	-3.59303	8.26782e-08	-0.183957	0.536474	0.797801	1
Solyc02g076980	SL3.0ch02	42631971	42633971	+	1927	7772	1761	9927	19.868	15.067	-4.80129	1.49913e-19	4.28269	0.2802	0.0753915	0.482053
Solyc02g076990	SL3.0ch02	42638501	42640501	+	4745	8633	4988	9784	35.469	33.767	-1.70209	0.00195154	-5.12548e-15	-3.91086	1	1
Solyc02g077020	SL3.0ch02	42660370	42662370	+	7080	7692	7628	8679	47.929	46.777	-1.15106	0.0231704	-5.12548e-15	-3.91086	1	1
Solyc02g077030	SL3.0ch02	42671786	42673786	+	1025	1650	219	1052	38.318	17.231	-21.0872	1.42473e-41	1.82806	-2.77402	1	1
Solyc02g077040	SL3.0ch02	42678236	42680236	+	578	2919	517	3723	16.528	12.193	-4.33506	9.00516e-08	0.103542	5.73322	0.874865	1
Solyc02g077070	SL3.0ch02	42696194	42698194	-	1137	4177	620	3521	21.396	14.972	-6.42408	4.16145e-15	0.613523	0.673172	0.472804	1
Solyc02g077130	SL3.0ch02	42748543	42750543	-	5065	8150	5727	10640	38.328	34.991	-3.33652	5.7593e-09	-4.5285	-2.59595	0.129299	0.643738
Solyc02g077190	SL3.0ch02	42748300	42750300	+	5028	7736	5671	9449	39.392	37.507	-1.88543	0.000962716	-1.61751	0.89277	0.0252463	0.24545
Solyc02g077160	SL3.0ch02	42757042	42759042	-	244	1255	172	1235	16.278	12.225	-4.05293	0.00147758	-0.205783	3.21445	0.641162	1
Solyc02g077225	SL3.0ch02	42788774	42790774	+	2245	6671	2250	8359	25.179	21.208	-3.97104	1.21566e-10	-3.03766	-2.41717	0.229315	0.854607
Solyc02g077270	SL3.0ch02	42831460	42833460	-	3574	1935	4415	2710	64.876	61.965	-2.91075	0.000618934	0.749426	2.61903	0.14811	0.693313
Solyc02g077310	SL3.0ch02	42847359	42849359	+	1033	5174	643	4367	16.643	12.834	-3.80817	2.90054e-08	0.781851	0.715705	0.206653	0.814049
Solyc02g077440	SL3.0ch02	42945989	42947989	+	3866	8470	3945	10688	31.339	26.96	-4.37956	1.09988e-14	0.597373	3.75063	0.114958	0.605654
Solyc02g077550	SL3.0ch02	43002023	43004023	+	538	1691	247	913	24.136	21.293	-2.84328	0.0336381	-4.26497	-2.10344	0.0875088	0.520628
Solyc02g077650	SL3.0ch02	43108266	43110266	-	1311	3861	1031	4846	25.348	17.543	-7.80506	1.0383e-22	0.0665162	0.692641	0.968342	1
Solyc02g077645	SL3.0ch02	43111352	43113352	-	8793	8699	9146	9991	50.269	47.792	-2.47646	2.64738e-06	-4.49426	-2.34363	0.11312	0.599951
Solyc02g077660	SL3.0ch02	43110859	43112859	+	8783	9333	9066	10224	48.482	46.998	-1.48356	0.00275905	0.00540219	5.84064	0.988843	1
Solyc02g077680	SL3.0ch02	43133012	43135012	+	6336	8076	7491	10158	43.963	42.444	-1.51903	0.00406716	0.417085	5.36638	0.133961	0.655157
Solyc02g077710	SL3.0ch02	43160004	43162004	+	2839	7139	3512	9402	28.453	27.195	-1.2573	0.0197289	-0.112662	8.9124	0.808063	1
Solyc02g077740	SL3.0ch02	43181631	43183631	-	548	8202	504	9597	6.263	4.99	-1.27325	0.000131867	0.0289454	5.39568	0.919924	1
Solyc02g077750	SL3.0ch02	43181179	43183179	+	532	5809	482	6713	8.39	6.699	-1.69075	0.000181887	-0.211669	6.82784	0.558135	1
Solyc02g077790	SL3.0ch02	43211597	43213597	+	715	5126	641	5477	12.241	10.477	-1.76377	0.00170992	-0.55588	4.00708	0.51804	1
Solyc02g077810	SL3.0ch02	43228677	43230677	+	2852	4412	2856	4762	39.262	37.49	-1.77196	0.0153567	-5.12548e-15	-3.69227	1	1
Solyc02g077840	SL3.0ch02	43255880	43257880	-	5468	8836	4334	8873	38.227	32.816	-5.41114	4.38961e-20	1.92904	0.588358	0.146403	0.688115
Solyc02g077850	SL3.0ch02	43268579	43270579	-	3351	9581	3437	11671	25.912	22.75	-3.16293	1.43786e-09	0.402611	4.10469	0.275181	0.933455
Solyc02g077860	SL3.0ch02	43267938	43269938	+	1268	4592	1426	5741	21.638	19.897	-1.74148	0.00889851	-3.50555	-1.96994	0.0127477	0.153059
Solyc02g077900	SL3.0ch02	43295422	43297422	+	7602	11016	7232	10931	40.831	39.817	-1.01424	0.0256346	-0.466269	6.08939	0.0841663	0.510888
Solyc02g077920	SL3.0ch02	43313396	43315396	-	3280	4173	1743	3440	44.009	33.629	-10.38	7.46501e-31	-0.308628	8.34323	0.383137	1
Solyc02g077960	SL3.0ch02	43356920	43358920	-	247	2266	211	2745	9.829	7.138	-2.69087	0.00033076	-2.09668	-1.66937	0.191966	0.786511
Solyc02g078040	SL3.0ch02	43426490	43428490	-	624	4942	437	4829	11.211	8.299	-2.9124	4.86582e-07	0.149753	3.67715	0.953591	1
Solyc02g078080	SL3.0ch02	43438808	43440808	-	916	2045	1051	3790	30.935	21.71	-9.2251	9.68303e-19	-5.12548e-15	-3.91086	1	1
Solyc02g078090	SL3.0ch02	43448618	43450618	-	1452	4443	1145	4291	24.631	21.063	-3.56776	7.43707e-06	-5.12548e-15	-3.91086	1	1
Solyc02g078160	SL3.0ch02	43500291	43502291	+	367	4143	288	4601	8.137	5.891	-2.2467	2.02336e-05	0.2474	7.44859	0.487189	1
Solyc02g078280	SL3.0ch02	43592275	43594275	-	3825	2275	4957	3196	62.705	60.8	-1.90521	0.0124573	-0.52554	0.915476	0.342469	1
Solyc02g078300	SL3.0ch02	43614913	43616913	-	2915	10296	2766	11011	22.065	20.077	-1.98801	5.77551e-05	-0.168639	3.18192	0.672221	1
Solyc02g078330	SL3.0ch02	43628124	43630124	-	3756	8798	3977	10511	29.919	27.45	-2.46845	8.53702e-06	-0.692609	2.35033	0.0976335	0.554086
Solyc02g078350	SL3.0ch02	43635538	43637538	+	2020	8631	1798	9434	18.965	16.008	-2.95752	1.40422e-08	-0.379122	2.00211	0.442033	1
Solyc02g078420	SL3.0ch02	43678629	43680629	-	649	4858	335	3913	11.785	7.886	-3.89894	3.43559e-10	-5.12548e-15	-3.76338	1	1
Solyc02g078440	SL3.0ch02	43678724	43680724	+	645	4607	325	3612	12.281	8.255	-4.02602	7.64949e-10	0.128755	4.81276	0.639181	1
Solyc02g078490	SL3.0ch02	43724104	43726104	+	3794	6877	4376	8371	35.554	34.33	-1.22466	0.026887	-0.324228	2.99533	0.354673	1
Solyc02g078540	SL3.0ch02	43774469	43776469	-	5861	6710	6966	8518	46.623	44.988	-1.63481	0.00416	0.177147	7.53331	0.579597	1
Solyc02g078550	SL3.0ch02	43786429	43788429	-	1752	7718	1642	8426	18.501	16.309	-2.19143	5.29461e-05	-0.800461	5.19145	0.0127812	0.153254
Solyc02g078580	SL3.0ch02	43810587	43812587	+	1234	7716	1341	9390	13.788	12.497	-1.2912	0.00503322	-0.245935	4.31206	0.405432	1
Solyc02g078640	SL3.0ch02	43870698	43872698	-	7365	5825	8715	7338	55.838	54.289	-1.54884	0.00514146	-0.259895	6.22472	0.394381	1
Solyc02g078650	SL3.0ch02	43883830	43885830	+	2130	9336	2393	11757	18.577	16.912	-1.665	0.00042405	5.6576	1.80159	0.0065513	0.0947406
Solyc02g078690	SL3.0ch02	43929001	43931001	-	1740	3725	1317	4075	31.839	24.425	-7.4139	3.94837e-17	2.59721	-1.47694	0.564977	1
Solyc02g078740	SL3.0ch02	43967571	43969571	-	5781	7161	5881	7881	44.669	42.734	-1.93491	0.00105577	-0.951165	-2.40647	0.694529	1
Solyc02g078750	SL3.0ch02	43958095	43960095	+	585	966	513	1675	37.718	23.446	-14.2715	3.30476e-20	-0.675248	1.62541	0.208111	0.816872
Solyc02g078830	SL3.0ch02	44050079	44052079	+	510	4955	321	4536	9.332	6.609	-2.7231	4.90429e-07	0.151751	5.66694	0.609443	1
Solyc02g078880	SL3.0ch02	44081053	44083053	-	5403	9128	5304	9394	37.183	36.087	-1.09603	0.0275488	-0.0158435	5.14255	0.961337	1
Solyc02g078970	SL3.0ch02	44135491	44137491	-	8078	9738	8047	10606	45.341	43.141	-2.20075	2.33454e-05	-0.577129	5.49641	0.0467109	0.363107
Solyc02g079010	SL3.0ch02	44188748	44190748	+	8068	6811	9038	9356	54.224	49.136	-5.08849	1.42976e-19	1.16468	4.89714	0.00599964	0.0888629
Solyc02g079020	SL3.0ch02	44199609	44201609	-	83	624	85	843	11.74	9.159	-2.58026	0.0494691	0.35687	4.03738	0.294507	0.961827
Solyc02g079025	SL3.0ch02	44205302	44207302	-	1863	8724	1772	9570	17.597	15.623	-1.97371	7.82987e-05	0.0286861	1.49287	0.968823	1
Solyc02g079070	SL3.0ch02	44252957	44254957	+	6534	5852	6253	6454	52.753	49.209	-3.54401	3.21489e-08	-2.98546	-3.65751	0.59279	1
Solyc02g079100	SL3.0ch02	44270176	44272176	+	4960	7353	5760	9336	40.283	38.156	-2.12683	0.00027645	-0.21012	6.78602	0.417238	1
Solyc02g079150	SL3.0ch02	44314224	44316224	-	8932	8021	10452	10246	52.687	50.498	-2.18921	2.34398e-05	2.12776	-1.61289	0.257663	0.903867
Solyc02g079190	SL3.0ch02	44354861	44356861	+	4155	8782	4652	11668	32.117	28.505	-3.61228	5.66867e-11	-0.855071	5.27991	0.00999269	0.128892
Solyc02g079210	SL3.0ch02	44378594	44380594	-	2858	5608	2241	6458	33.759	25.762	-7.99698	2.55346e-29	-0.5032	5.62921	0.100916	0.564611
Solyc02g079200	SL3.0ch02	44369211	44371211	+	2784	7595	2543	7348	26.823	25.71	-1.11315	0.0376994	-5.12548e-15	-3.91086	1	1
Solyc02g079220	SL3.0ch02	44384816	44386816	+	1447	5697	1183	5400	20.255	17.971	-2.28423	0.000545228	2.61928	3.97819	8.36808e-05	0.00345013
Solyc02g079290	SL3.0ch02	44458467	44460467	+	4996	5794	5551	7252	46.302	43.357	-2.94511	6.71673e-06	0.414269	3.29796	0.501324	1
Solyc02g079295	SL3.0ch02	44459576	44461576	+	3063	3283	3362	4283	48.267	43.976	-4.29017	5.46091e-07	-1.9826	-3.56063	1	1
Solyc02g079330	SL3.0ch02	44488594	44490594	-	1654	7577	1822	9199	17.918	16.532	-1.38581	0.00580139	2.43292	0.0280576	0.201058	0.80401
Solyc02g079370	SL3.0ch02	44514665	44516665	+	1492	3250	1762	4645	31.464	27.501	-3.96235	6.45507e-06	-5.12548e-15	-3.91086	1	1
Solyc02g079380	SL3.0ch02	44524110	44526110	-	218	2644	162	2612	7.617	5.84	-1.77711	0.00499346	-0.447235	2.247	0.343024	1
Solyc02g079410	SL3.0ch02	44533395	44535395	+	3529	4930	4478	6936	41.719	39.233	-2.48636	0.00033987	0.228369	5.15228	0.40861	1
Solyc02g079430	SL3.0ch02	44552714	44554714	-	5115	5092	5202	5875	50.113	46.962	-3.15049	5.08364e-06	0.222531	1.14002	0.774037	1
Solyc02g079450	SL3.0ch02	44562467	44564467	+	1155	4296	819	4745	21.189	14.72	-6.46915	3.80716e-18	-5.12548e-15	-3.91086	1	1
Solyc02g079460	SL3.0ch02	44565953	44567953	+	2776	5287	3012	6423	34.429	31.924	-2.50518	0.000373123	5.61525	-3.17957	0.0373145	0.314335
Solyc02g079510	SL3.0ch02	44602184	44604184	-	880	7321	810	8348	10.73	8.845	-1.88567	3.13672e-05	2.93184	4.11047	0.00192698	0.0391969
Solyc02g079530	SL3.0ch02	44616860	44618860	+	4512	9183	4488	9764	32.946	31.49	-1.45601	0.0058202	-5.12548e-15	-2.79241	1	1
Solyc02g079533	SL3.0ch02	44617272	44619272	+	3912	6785	3532	7057	36.571	33.355	-3.21563	1.10557e-06	2.48555	1.1426	0.0946444	0.544076
Solyc02g079620	SL3.0ch02	44682647	44684647	+	4016	7198	3571	8147	35.812	30.474	-5.33789	4.17299e-17	-5.12548e-15	-3.91086	1	1
Solyc02g079630	SL3.0ch02	44683557	44685557	+	2801	3224	2592	3425	46.49	43.078	-3.41168	0.000147746	-1.78455	-2.57158	0.41112	1
Solyc02g079680	SL3.0ch02	44715622	44717622	-	4635	4142	3964	4822	52.808	45.117	-7.69124	1.60312e-23	-5.12548e-15	-3.91086	1	1
Solyc02g079720	SL3.0ch02	44733382	44735382	+	5845	6045	5481	6189	49.159	46.967	-2.19238	0.000587922	2.41525	-0.535652	0.110244	0.592185
Solyc02g079730	SL3.0ch02	44734117	44736117	+	3947	4705	3757	5092	45.62	42.457	-3.16274	2.59562e-05	-0.208376	3.42577	0.600911	1
Solyc02g079770	SL3.0ch02	44780859	44782859	+	3255	9779	3148	11665	24.973	21.252	-3.72154	5.59469e-13	0.208398	5.97202	0.487363	1
Solyc02g079790	SL3.0ch02	44789846	44791846	+	5270	7191	5191	8062	42.292	39.168	-3.12346	4.67168e-07	1.79785	4.71128	0.00599735	0.0888629
Solyc02g079830	SL3.0ch02	44798295	44800295	+	400	1244	264	1021	24.331	20.545	-3.78615	0.00966188	-0.471254	3.38612	0.227515	0.851052
Solyc02g079860	SL3.0ch02	44828400	44830400	-	109	2684	50	2397	3.903	2.043	-1.8593	8.58384e-05	-1.2714	-1.06697	0.121815	0.623777
Solyc02g079870	SL3.0ch02	44828129	44830129	+	111	2910	59	2940	3.674	1.967	-1.70696	6.03894e-05	-1.73029	0.583352	0.0677532	0.453395
Solyc02g079880	SL3.0ch02	44836699	44838699	-	6198	5747	7395	7284	51.888	50.378	-1.50973	0.00878067	-0.384108	5.3548	0.3932	1
Solyc02g079890	SL3.0ch02	44842062	44844062	-	673	5573	539	7141	10.775	7.018	-3.75667	2.21484e-14	-5.12548e-15	-3.91086	1	1
Solyc02g079950	SL3.0ch02	44886831	44888831	-	783	2472	891	3092	24.055	22.37	-1.68523	0.0462563	1.03921	5.77291	0.0924893	0.537189
Solyc02g080010	SL3.0ch02	44919872	44921872	-	500	720	532	1212	40.984	30.505	-10.479	8.60195e-09	6.20519	3.88373	4.08914e-07	5.04346e-05
Solyc02g080020	SL3.0ch02	44921483	44923483	-	498	319	526	508	60.955	50.87	-10.0843	1.52693e-05	6.3506	-1.18058	7.38462e-05	0.00314819
Solyc02g080030	SL3.0ch02	44927152	44929152	-	1078	5748	942	6490	15.793	12.675	-3.11764	1.49943e-07	2.56329	-1.55025	0.0328337	0.289403
Solyc02g080060	SL3.0ch02	44935870	44937870	-	1849	7629	1891	8491	19.508	18.214	-1.29412	0.011653	3.74996	-0.877636	0.0226214	0.228373
Solyc02g080110	SL3.0ch02	44967327	44969327	+	5950	9865	6413	11849	37.623	35.117	-2.50587	2.00527e-06	0.47395	5.52406	0.186273	0.77608
Solyc02g080130	SL3.0ch02	44992561	44994561	+	3979	7271	3935	7559	35.369	34.235	-1.13364	0.0381224	-0.0936428	7.01579	0.716393	1
Solyc02g080165	SL3.0ch02	45025817	45027817	+	3275	4493	3380	4968	42.16	40.489	-1.6714	0.017791	0.678711	-0.583673	0.474365	1
Solyc02g080180	SL3.0ch02	45027585	45029585	+	52	1323	35	1353	3.782	2.522	-1.2602	0.0331545	0.00864504	1.29859	1	1
Solyc02g080265	SL3.0ch02	45089754	45091754	+	36	449	13	434	7.423	2.908	-4.5144	0.00138647	-4.51841	-3.16963	0.0603673	0.423286
Solyc02g080320	SL3.0ch02	45127544	45129544	-	5627	8418	6138	9665	40.064	38.841	-1.22335	0.0176924	-0.739149	3.42375	0.121112	0.62178
Solyc02g080310	SL3.0ch02	45116014	45118014	+	79	3092	55	3118	2.491	1.733	-0.757952	0.0200099	-5.12548e-15	-3.24001	1	1
Solyc02g080330	SL3.0ch02	45131348	45133348	+	457	4618	390	4915	9.005	7.352	-1.65337	0.00160578	-5.12548e-15	-3.87098	1	1
Solyc02g080370	SL3.0ch02	45159416	45161416	+	1413	1447	970	1871	49.406	34.143	-15.2627	1.5295e-30	0.454966	7.18888	0.107461	0.584555
Solyc02g080410	SL3.0ch02	45196141	45198141	-	12443	8795	11097	9335	58.588	54.312	-4.27652	6.64315e-18	-5.12548e-15	-3.6711	1	1
Solyc02g080420	SL3.0ch02	45197358	45199358	+	2932	6621	2596	6691	30.692	27.953	-2.73888	3.74586e-05	-0.271508	7.11923	0.292038	0.958582
Solyc02g080450	SL3.0ch02	45215436	45217436	+	2705	7224	2578	8094	27.243	24.157	-3.08676	5.43442e-07	1.82369	-2.49866	1	1
Solyc02g080480	SL3.0ch02	45244747	45246747	-	1828	7514	1906	8382	19.568	18.526	-1.04111	0.03404	0.707987	1.99225	0.347281	1
Solyc02g080580	SL3.0ch02	45332422	45334422	+	1013	5148	825	4641	16.442	15.093	-1.34883	0.0251652	-5.12548e-15	-3.26972	1	1
Solyc02g080590	SL3.0ch02	45341820	45343820	+	8938	6441	9512	7164	58.118	57.04	-1.07816	0.0273853	0.405598	5.5461	0.186293	0.77608
Solyc02g080610	SL3.0ch02	45348244	45350244	-	36	836	9	439	4.128	2.009	-2.11951	0.0282684	-5.12548e-15	-3.91086	1	1
Solyc02g080620	SL3.0ch02	45359170	45361170	+	6620	7933	7616	9550	45.489	44.367	-1.12213	0.0247706	5.0953	0.847284	8.57039e-05	0.00351947
Solyc02g080635	SL3.0ch02	45371436	45373436	+	333	1893	365	2552	14.96	12.513	-2.44671	0.00740129	-0.294577	0.305394	0.626615	1
Solyc02g080670	SL3.0ch02	45398946	45400946	+	3426	5893	4288	7982	36.764	34.947	-1.81658	0.00383697	1.85048	-2.56543	1	1
Solyc02g080710	SL3.0ch02	45422857	45424857	+	4383	7921	4740	9710	35.623	32.803	-2.81979	1.58832e-06	-5.12548e-15	-3.75752	1	1
Solyc02g080790	SL3.0ch02	45473114	45475114	-	2780	9099	2685	10633	23.403	20.161	-3.24196	9.80545e-10	-0.393225	-1.64262	0.803389	1
Solyc02g080830	SL3.0ch02	45504902	45506902	+	7415	6406	7772	7189	53.65	51.948	-1.70184	0.00264586	5.93336	2.27107	0.000361277	0.0108317
Solyc02g080860	SL3.0ch02	45524480	45526480	-	10118	9197	11608	11069	52.384	51.188	-1.19573	0.00880004	1.80048	-3.57811	1	1
Solyc02g080840	SL3.0ch02	45514592	45516592	+	5326	6815	5229	7682	43.868	40.5	-3.36754	1.02668e-07	-5.12548e-15	-3.91086	1	1
Solyc02g080850	SL3.0ch02	45518232	45520232	+	244	3637	224	4570	6.287	4.673	-1.61453	0.000729726	-5.12548e-15	-3.91086	1	1
Solyc02g080870	SL3.0ch02	45526402	45528402	+	4210	6963	4481	9138	37.68	32.903	-4.77756	1.69894e-14	1.53086	-2.95755	0.488911	1
Solyc02g080890	SL3.0ch02	45549047	45551047	-	1332	7890	1542	10617	14.444	12.682	-1.76176	0.000165824	0.617429	4.85464	0.344317	1
Solyc02g080920	SL3.0ch02	45573993	45575993	-	3355	5737	4060	7413	36.901	35.387	-1.51314	0.014398	6.78641	-2.31712	0.00655301	0.0947406
Solyc02g080930	SL3.0ch02	45579026	45581026	-	11095	7073	10724	7089	61.069	60.203	-0.86569	0.0469956	6.34254	-2.97039	0.0308691	0.278117
Solyc02g081030	SL3.0ch02	45651748	45653748	-	2684	7296	2690	7993	26.894	25.18	-1.71359	0.00343088	1.40641	6.36022	0.000132934	0.00496324
Solyc02g081060	SL3.0ch02	45666106	45668106	+	1102	2365	740	2253	31.785	24.724	-7.06105	6.88003e-10	-2.91779	-2.41845	0.232135	0.858811
Solyc02g081070	SL3.0ch02	45694587	45696587	+	7831	10023	8364	11285	43.861	42.567	-1.29427	0.00706336	0.914356	5.01441	0.0405021	0.3309
Solyc02g081160	SL3.0ch02	45786774	45788774	-	2275	6662	2761	8674	25.456	24.145	-1.3108	0.0178514	0.473802	8.04014	0.0762083	0.485153
Solyc02g081170	SL3.0ch02	45790041	45792041	-	420	5088	476	7454	7.625	6.003	-1.62275	0.00021033	0.13677	7.63225	0.665347	1
Solyc02g081300	SL3.0ch02	45875277	45877277	-	2160	3352	1736	3121	39.187	35.742	-3.445	0.000263658	-1.56816	3.12197	8.27045e-05	0.00342381
Solyc02g081310	SL3.0ch02	45882108	45884108	-	2589	3454	2932	4573	42.843	39.067	-3.77567	9.89804e-06	0.0590751	4.77706	0.846081	1
Solyc02g081340	SL3.0ch02	45893911	45895911	+	4058	5328	4104	5787	43.235	41.492	-1.74234	0.00889441	-5.49533	-2.5076	0.0172662	0.188978
Solyc02g081430	SL3.0ch02	45958176	45960176	+	3188	10194	3368	12173	23.823	21.672	-2.15134	1.39776e-05	0.935467	1.99042	0.0923958	0.536844
Solyc02g081440	SL3.0ch02	45958176	45960176	+	3188	10194	3368	12173	23.823	21.672	-2.15134	1.39776e-05	-1.81766	-1.93845	0.506655	1
Solyc02g081445	SL3.0ch02	45969607	45971607	-	109	1418	73	1642	7.138	4.257	-2.88162	0.00033558	2.18447	1.88189	0.00555134	0.0846378
Solyc02g081460	SL3.0ch02	45980289	45982289	-	5865	6620	6230	7754	46.976	44.551	-2.42546	7.31497e-05	-0.132156	4.56412	0.657807	1
Solyc02g081470	SL3.0ch02	45983154	45985154	-	919	5921	861	6167	13.436	12.251	-1.18468	0.0204774	-5.12548e-15	-3.76702	1	1
Solyc02g081540	SL3.0ch02	46017601	46019601	-	565	3208	856	5614	14.975	13.23	-1.74453	0.00900522	2.26172	-2.12965	0.140939	0.673496
Solyc02g081570	SL3.0ch02	46027384	46029384	-	3339	5487	2789	6563	37.831	29.822	-8.00891	4.45684e-29	-1.97749	-3.44746	1	1
Solyc02g081670	SL3.0ch02	46095633	46097633	+	1568	6376	1370	6473	19.738	17.468	-2.27036	0.000209653	-2.78365	-2.4199	0.582546	1
Solyc02g081680	SL3.0ch02	46105355	46107355	-	3183	4859	4112	6683	39.58	38.092	-1.488	0.0209419	-0.0250068	4.53213	0.943591	1
Solyc02g081700	SL3.0ch02	46110366	46112366	+	26	464	2	368	5.306	0.541	-4.76558	4.41933e-05	0.288508	7.61772	0.366597	1
Solyc02g081800	SL3.0ch02	46167448	46169448	+	2275	7960	2109	8064	22.228	20.731	-1.4963	0.00595233	0.347077	-1.35014	0.728101	1
Solyc02g081860	SL3.0ch02	46201270	46203270	-	10882	6175	12221	7623	63.798	61.585	-2.21249	1.29361e-05	-0.419362	1.41427	0.427883	1
Solyc02g081870	SL3.0ch02	46202079	46204079	+	8457	6582	9068	7389	56.234	55.101	-1.13262	0.0233654	-5.12548e-15	-3.91086	1	1
Solyc02g081880	SL3.0ch02	46217705	46219705	-	1453	4356	1115	4034	25.013	21.655	-3.35822	3.4174e-05	0.509524	7.65599	0.0941573	0.542449
Solyc02g081970	SL3.0ch02	46278331	46280331	-	3616	3018	3671	3899	54.507	48.494	-6.01303	2.29841e-12	0.349209	3.83396	0.607873	1
Solyc02g082000	SL3.0ch02	46302128	46304128	-	4958	9128	3676	10089	35.198	26.705	-8.49266	1.29199e-51	0.200094	9.26989	0.572779	1
Solyc02g082010	SL3.0ch02	46301669	46303669	+	4929	7514	3645	8614	39.613	29.733	-9.87938	2.19527e-58	0.11685	3.24032	0.75811	1
Solyc02g082040	SL3.0ch02	46335344	46337344	+	959	8128	790	8899	10.554	8.154	-2.39996	2.78568e-08	-5.12548e-15	-3.20875	1	1
Solyc02g082050	SL3.0ch02	46343352	46345352	+	3390	9939	3664	11378	25.433	24.358	-1.0748	0.0206435	-0.967373	-0.463869	0.403307	1
Solyc02g082070	SL3.0ch02	46355171	46357171	+	4423	10076	5162	12632	30.506	29.01	-1.49577	0.00241868	1.85923	-0.0435312	0.0512836	0.383836
Solyc02g082090	SL3.0ch02	46370634	46372634	-	3483	6213	4242	8218	35.922	34.045	-1.87709	0.00252969	-5.12548e-15	-3.87342	1	1
Solyc02g082130	SL3.0ch02	46409028	46411028	-	5305	7254	5377	8344	42.241	39.188	-3.05252	6.40215e-07	-0.00824515	5.60819	0.976838	1
Solyc02g082230	SL3.0ch02	46485455	46487455	-	4939	8747	4572	8690	36.088	34.474	-1.61353	0.00369393	0.138115	4.85965	0.63594	1
Solyc02g082250	SL3.0ch02	46496834	46498834	+	1444	4456	846	3237	24.475	20.72	-3.75452	1.22229e-05	0.024984	0.492702	1	1
Solyc02g082270	SL3.0ch02	46526263	46528263	+	3837	8494	4147	9942	31.117	29.434	-1.68239	0.0020648	0.115313	7.69432	0.73024	1
Solyc02g082285	SL3.0ch02	46548878	46550878	-	4660	6205	4719	7706	42.89	37.98	-4.91013	8.74113e-14	-5.12548e-15	-3.91086	1	1
Solyc02g082290	SL3.0ch02	46549456	46551456	+	5634	6631	5636	7511	45.936	42.869	-3.06649	1.11057e-06	0.273894	4.14879	0.563166	1
Solyc02g082300	SL3.0ch02	46563892	46565892	+	94	1187	19	881	7.338	2.111	-5.22691	3.07983e-08	-1.17739	1.39064	0.0295755	0.270275
Solyc02g082310	SL3.0ch02	46565997	46567997	+	425	1888	285	1852	18.374	13.336	-5.03795	4.90735e-06	0.874294	-0.0869015	0.442966	1
Solyc02g082320	SL3.0ch02	46583018	46585018	+	278	551	338	1064	33.534	24.108	-9.42596	2.29851e-06	1.8079	-3.41907	1	1
Solyc02g082330	SL3.0ch02	46584214	46586214	+	302	1155	253	1574	20.728	13.848	-6.87968	3.19102e-07	0.362311	-0.291374	0.667799	1
Solyc02g082350	SL3.0ch02	46600115	46602115	+	1693	6553	1870	8237	20.531	18.502	-2.02914	0.00043702	1.35236	5.60411	1.58919e-05	0.000960172
Solyc02g082360	SL3.0ch02	46606721	46608721	+	6462	5820	7580	7987	52.614	48.693	-3.92083	1.7897e-10	0.845911	2.63852	0.132503	0.651154
Solyc02g082390	SL3.0ch02	46627406	46629406	-	1422	5874	1559	6966	19.49	18.287	-1.20274	0.0290524	-4.28779	-3.32695	0.216037	0.830948
Solyc02g082440	SL3.0ch02	46694693	46696693	-	7530	9575	8225	12118	44.022	40.432	-3.59062	6.13856e-12	0.943262	1.96125	0.105429	0.578438
Solyc02g082460	SL3.0ch02	46726293	46728293	-	8821	11414	10098	14051	43.593	41.815	-1.77739	0.000141926	-0.115177	6.1637	0.656353	1
Solyc02g082510	SL3.0ch02	46752077	46754077	+	3192	7658	3599	9212	29.419	28.093	-1.32631	0.0144542	1.00315	6.22789	0.00595616	0.0885756
Solyc02g082615	SL3.0ch02	46840225	46842225	+	145	943	102	879	13.327	10.398	-2.92965	0.0226103	0.0885879	-0.911421	0.955534	1
Solyc02g082680	SL3.0ch02	46883656	46885656	-	1185	7864	1024	8593	13.095	10.648	-2.44756	3.15489e-07	-1.01319	3.96857	0.0215752	0.220876
Solyc02g082690	SL3.0ch02	46891147	46893147	+	3511	7528	3358	8324	31.805	28.745	-3.06034	6.84511e-07	1.47355	6.33639	0.00247882	0.046961
Solyc02g082740	SL3.0ch02	46943744	46945744	+	4943	5808	5001	6522	45.977	43.4	-2.57696	0.000101318	1.1426	4.75629	0.0687318	0.457262
Solyc02g082760	SL3.0ch02	46962227	46964227	-	4125	8751	4374	10717	32.036	28.984	-3.05218	5.21731e-08	0.169583	4.71292	0.640402	1
Solyc02g082770	SL3.0ch02	46973128	46975128	+	4067	6381	4421	7588	38.926	36.814	-2.11205	0.000878587	0.196757	4.7681	0.561833	1
Solyc02g082780	SL3.0ch02	46990325	46992325	-	3508	5388	3092	5143	39.433	37.547	-1.8864	0.00699394	-5.12548e-15	-3.91086	1	1
Solyc02g082790	SL3.0ch02	46994447	46996447	-	1237	3459	1180	4344	26.342	21.361	-4.98023	6.73498e-09	-5.12548e-15	-3.91086	1	1
Solyc02g082830	SL3.0ch02	47032568	47034568	+	2673	6942	2732	8660	27.8	23.982	-3.81857	6.33715e-10	0.210141	5.14558	0.528624	1
Solyc02g082840	SL3.0ch02	47048058	47050058	-	10953	4467	11356	5393	71.031	67.801	-3.23007	7.15033e-10	-0.105334	5.79249	0.729748	1
Solyc02g082850	SL3.0ch02	47055517	47057517	-	5061	8540	5266	9761	37.21	35.044	-2.16691	0.000122281	-0.696542	3.44236	0.163421	0.726749
Solyc02g082910	SL3.0ch02	47101398	47103398	-	939	5327	699	5070	14.986	12.116	-2.86915	5.21356e-06	0.984348	2.99251	0.127238	0.637223
Solyc02g082930	SL3.0ch02	47107616	47109616	+	1796	3315	2128	4775	35.14	30.827	-4.31272	8.98043e-07	1.79712	5.2262	0.123806	0.629557
Solyc02g082960	SL3.0ch02	47117362	47119362	+	616	836	276	669	42.424	29.206	-13.2179	1.03309e-10	-5.12548e-15	-3.40041	1	1
Solyc02g082970	SL3.0ch02	47122046	47124046	+	8122	5616	8268	7516	59.121	52.382	-6.73853	3.65088e-30	-0.473886	3.63141	0.248388	0.887912
Solyc02g082985	SL3.0ch02	47129710	47131710	+	327	1463	260	2414	18.268	9.723	-8.5449	1.03233e-15	1.81381	-3.11297	0.530275	1
Solyc02g083110	SL3.0ch02	47186524	47188524	-	11711	7301	13422	9036	61.598	59.765	-1.83304	0.000124967	0.324148	4.54128	0.30396	0.975368
Solyc02g083130	SL3.0ch02	47194120	47196120	+	2854	8471	2964	9968	25.201	22.92	-2.28099	3.29443e-05	-0.638975	3.18361	0.184562	0.772729
Solyc02g083140	SL3.0ch02	47199236	47201236	+	2347	5862	2278	6747	28.591	25.241	-3.34957	9.82513e-07	-0.377813	4.50265	0.238986	0.870384
Solyc02g083150	SL3.0ch02	47216129	47218129	-	1922	2992	2345	3969	39.113	37.14	-1.97305	0.0181849	0.0674789	4.326	0.821064	1
Solyc02g083160	SL3.0ch02	47216017	47218017	+	1922	3139	2362	4315	37.977	35.375	-2.60152	0.00263657	-5.12548e-15	-3.91086	1	1
Solyc02g083300	SL3.0ch02	47308420	47310420	-	2699	9296	2776	10114	22.501	21.536	-0.964968	0.0352093	-5.12548e-15	-3.91086	1	1
Solyc02g083310	SL3.0ch02	47323145	47325145	-	191	3392	114	2664	5.331	4.104	-1.22706	0.0139844	0.345216	5.36634	0.363147	1
Solyc02g083345	SL3.0ch02	47342642	47344642	-	2072	6596	2096	7444	23.904	21.971	-1.93336	0.00141927	-1.54286	2.60769	0.047942	0.368486
Solyc02g083375	SL3.0ch02	47361950	47363950	+	921	1315	352	690	41.19	33.781	-7.40843	4.93475e-05	-0.522483	5.22283	0.186026	0.77586
Solyc02g083410	SL3.0ch02	47380572	47382572	+	1270	3350	1355	4176	27.489	24.498	-2.9909	0.000496535	1.05176	3.81074	0.00881196	0.116996
Solyc02g083420	SL3.0ch02	47391374	47393374	-	1590	9882	1464	10966	13.86	11.778	-2.08188	1.81969e-06	0.68508	5.89711	0.0162919	0.181645
Solyc02g083440	SL3.0ch02	47401009	47403009	+	583	2711	355	2061	17.699	14.694	-3.00514	0.00186205	-5.12548e-15	-3.68723	1	1
Solyc02g083460	SL3.0ch02	47411817	47413817	+	800	9129	788	10547	8.057	6.952	-1.10529	0.0016888	1.77997	4.22985	0.00314264	0.0558677
Solyc02g083470	SL3.0ch02	47422957	47424957	-	2788	7290	2914	8292	27.664	26.004	-1.66029	0.00410886	-0.00186068	4.94705	0.998588	1
Solyc02g083480	SL3.0ch02	47422104	47424104	+	1671	6691	1722	7640	19.983	18.394	-1.58975	0.00471859	1.81324	-3.83467	1	1
Solyc02g083540	SL3.0ch02	47458840	47460840	-	7078	8493	8036	10210	45.456	44.043	-1.41377	0.00580327	-0.473564	3.89559	0.226169	0.849123
Solyc02g083550	SL3.0ch02	47470526	47472526	+	2795	6829	3111	8691	29.042	26.36	-2.68204	1.32298e-05	-5.12548e-15	-3.5617	1	1
Solyc02g083580	SL3.0ch02	47491474	47493474	-	307	3098	222	2880	9.016	7.157	-1.85948	0.00412788	0.122898	2.96783	0.758482	1
Solyc02g083610	SL3.0ch02	47514187	47516187	-	510	7775	327	7513	6.156	4.171	-1.98478	1.98606e-08	-2.42541	-0.404113	0.00316704	0.0562457
Solyc02g083620	SL3.0ch02	47515779	47517779	+	1310	6978	922	7202	15.806	11.349	-4.4569	3.3632e-16	0.603348	1.88906	0.326093	1
Solyc02g083700	SL3.0ch02	47562625	47564625	-	2095	6051	2169	6965	25.718	23.746	-1.9717	0.00194655	0.964302	6.48279	0.00741595	0.103574
Solyc02g083710	SL3.0ch02	47571707	47573707	-	4436	10266	4564	11139	30.173	29.065	-1.10826	0.0191721	-0.000995913	7.55232	0.997043	1
Solyc02g083750	SL3.0ch02	47595701	47597701	-	9556	9333	10852	11210	50.59	49.189	-1.40164	0.00312932	-5.12548e-15	-3.91086	1	1
Solyc02g083785	SL3.0ch02	47608206	47610206	+	658	1752	646	2215	27.303	22.58	-4.72339	7.32665e-05	0.736898	1.91422	0.120925	0.621092
Solyc02g083810	SL3.0ch02	47627412	47629412	-	6197	6132	6563	6968	50.264	48.503	-1.76017	0.00311817	0.00903161	7.13517	0.979802	1
Solyc02g083840	SL3.0ch02	47659364	47661364	+	87	2333	53	2109	3.595	2.451	-1.14361	0.0144821	-0.938452	-2.72434	0.73108	1
Solyc02g083880	SL3.0ch02	47690653	47692653	+	3767	6157	4059	7545	37.958	34.979	-2.97917	6.75932e-06	1.88911	6.57853	0.0256433	0.24814
Solyc02g083900	SL3.0ch02	47720903	47722903	-	4419	8156	4543	8984	35.141	33.585	-1.55647	0.00529256	-0.598941	6.25624	0.06869	0.457185
Solyc02g083940	SL3.0ch02	47731826	47733826	+	7708	8109	7812	8920	48.732	46.689	-2.0434	0.000191602	-0.0124413	3.66609	0.971918	1
Solyc02g084110	SL3.0ch02	47857689	47859689	+	1865	5260	1800	6179	26.175	22.559	-3.61622	3.44884e-07	5.22406	-2.84473	0.0629215	0.433637
Solyc02g084117	SL3.0ch02	47879052	47881052	-	2651	4730	633	3617	35.917	14.894	-21.0224	1.62982e-136	6.28558	0.81211	6.87576e-05	0.00299187
Solyc02g084167	SL3.0ch02	47923766	47925766	-	453	3269	444	4357	12.171	9.248	-2.9228	1.44343e-05	4.38222	0.707905	6.58543e-05	0.00289577
Solyc02g084180	SL3.0ch02	47923147	47925147	-	438	3157	408	3626	12.184	10.114	-2.06956	0.00291222	-0.546081	-3.52886	1	1
Solyc02g084190	SL3.0ch02	47926541	47928541	-	3603	5353	5948	9633	40.23	38.175	-2.05531	0.00111149	2.26507	-1.59189	0.262155	0.911571
Solyc02g084330	SL3.0ch02	48003922	48005922	+	97	652	40	393	12.951	9.238	-3.71273	0.0309727	2.24724	2.28197	0.0002251	0.00751061
Solyc02g084400	SL3.0ch02	48076994	48078994	-	3774	6647	4780	8819	36.215	35.15	-1.06569	0.0447169	1.19423	2.81927	0.0523409	0.388893
Solyc02g084440	SL3.0ch02	48090998	48092998	-	4240	4814	5566	6683	46.83	45.44	-1.38969	0.0243308	-1.00836	9.78173	0.0334035	0.293412
Solyc02g084500	SL3.0ch02	48232881	48234881	-	631	359	9720	9224	63.737	51.309	-12.4283	5.62189e-14	-0.276831	4.72219	0.35367	1
Solyc02g084530	SL3.0ch02	48250719	48252719	+	258	411	275	889	38.565	23.625	-14.9396	4.70204e-11	-0.69051	-1.67711	0.693779	1
Solyc02g084560	SL3.0ch02	48276382	48278382	+	43	1154	10	730	3.592	1.351	-2.24096	0.00250795	-0.703713	2.84886	0.079948	0.498525
Solyc02g084640	SL3.0ch02	48373296	48375296	+	8112	9645	8526	11400	45.683	42.788	-2.89508	2.65965e-08	-0.757697	3.68108	0.378812	1
Solyc02g084680	SL3.0ch02	48413576	48415576	+	2930	6184	2817	9248	32.148	23.349	-8.79981	1.84237e-44	-0.659837	-0.744216	0.527358	1
Solyc02g084760	SL3.0ch02	48497044	48499044	+	4165	8837	3988	10166	32.034	28.176	-3.85775	1.1253e-11	0.653592	5.78615	0.0234674	0.233811
Solyc02g084800	SL3.0ch02	48531783	48533783	-	1339	4832	952	4267	21.698	18.241	-3.45722	5.28804e-06	-5.12548e-15	-3.80232	1	1
Solyc02g084820	SL3.0ch02	48546235	48548235	+	6824	6410	10759	11294	51.564	48.787	-2.77714	5.84404e-07	0.0792717	5.28678	0.774743	1
Solyc02g084860	SL3.0ch02	48569256	48571256	-	1223	3013	1077	4092	28.872	20.836	-8.03583	1.32267e-18	-1.44404	-1.11671	0.29402	0.960849
Solyc02g084890	SL3.0ch02	48590733	48592733	-	3265	2219	5257	5941	59.537	46.946	-12.591	1.84311e-51	9.87335	6.12622	2.38401e-29	8.52712e-26
Solyc02g084910	SL3.0ch02	48605023	48607023	-	2568	7769	3267	12600	24.843	20.59	-4.25289	3.26926e-15	1.22077	0.672307	0.0923013	0.536541
Solyc02g085000	SL3.0ch02	48675124	48677124	-	6477	4021	13795	12982	61.697	51.518	-10.1794	2.37044e-69	0.0837625	5.98245	0.76449	1
Solyc02g085035	SL3.0ch02	48699441	48701441	-	366	1885	389	2867	16.259	11.947	-4.31227	7.04053e-06	-1.2305	1.96306	0.0796997	0.49765
Solyc02g085060	SL3.0ch02	48719865	48721865	-	22	421	1	216	4.966	0.461	-4.50531	0.00164243	-5.12548e-15	-3.83515	1	1
Solyc02g085090	SL3.0ch02	48725737	48727737	+	394	2440	93	1880	13.903	4.714	-9.18898	2.57011e-26	-3.94597	-2.51954	0.05929	0.419072
Solyc02g085120	SL3.0ch02	48741413	48743413	-	241	5609	243	7528	4.12	3.127	-0.992647	0.00164199	-5.05178	-2.21454	0.0487323	0.371446
Solyc02g085150	SL3.0ch02	48770159	48772159	+	467	7243	537	9351	6.057	5.431	-0.626243	0.0391534	-5.12548e-15	-1.79517	1	1
Solyc02g085180	SL3.0ch02	48798997	48800997	-	1397	2628	1571	3799	34.708	29.255	-5.45295	3.21142e-08	0.555785	3.57353	0.178939	0.761429
Solyc02g085210	SL3.0ch02	48816157	48818157	+	216	1328	121	2178	13.99	5.263	-8.72648	1.3005e-19	-5.12548e-15	-3.91086	1	1
Solyc02g085230	SL3.0ch02	48844442	48846442	-	1420	3252	1381	4137	30.394	25.027	-5.36665	2.87921e-09	-0.345933	3.84393	0.459737	1
Solyc02g085240	SL3.0ch02	48843359	48845359	+	1419	2837	1365	3536	33.341	27.851	-5.48971	2.24366e-08	-2.17123	2.16466	8.35785e-07	8.92369e-05
Solyc02g085245	SL3.0ch02	48845657	48847657	+	41	592	5	489	6.477	1.012	-5.46495	1.42575e-06	-3.36098	-0.674496	0.00183727	0.0379058
Solyc02g085250	SL3.0ch02	48858501	48860501	-	3919	9614	5648	14755	28.959	27.682	-1.27664	0.00662729	0.278867	4.26641	0.382064	1
Solyc02g085290	SL3.0ch02	48874960	48876960	-	675	1722	207	794	28.16	20.679	-7.48088	5.76687e-06	2.50124	2.33383	0.000140784	0.00519982
Solyc02g085300	SL3.0ch02	48876824	48878824	-	60	980	11	779	5.769	1.392	-4.37683	7.12071e-07	0.389876	1.3993	0.564267	1
Solyc02g085315	SL3.0ch02	48884432	48886432	-	1337	1122	1264	1201	54.372	51.278	-3.09381	0.0168445	-1.23059	5.40971	0.00110017	0.0253648
Solyc02g085320	SL3.0ch02	48885644	48887644	-	1729	2943	1884	3452	37.008	35.307	-1.70036	0.0403986	-0.369149	3.43964	0.447678	1
Solyc02g085390	SL3.0ch02	48955689	48957689	-	1272	2352	1434	3497	35.099	29.081	-6.01802	6.90431e-09	3.17901	1.68935	0.000108582	0.00418959
Solyc02g085400	SL3.0ch02	48960012	48962012	-	567	2371	433	2558	19.299	14.477	-4.82208	1.02475e-06	2.54325	1.39842	0.0160925	0.179843
Solyc02g085410	SL3.0ch02	48959442	48961442	+	311	1166	100	1240	21.056	7.463	-13.5935	1.56241e-24	-1.75987	-3.87229	1	1
Solyc02g085440	SL3.0ch02	48978708	48980708	-	5248	3798	8948	9276	58.015	49.1	-8.9145	1.58585e-42	1.83534	-2.33936	0.440039	1
Solyc02g085530	SL3.0ch02	49019528	49021528	-	12	661	6	836	1.783	0.713	-1.07047	0.0459459	0.833608	-1.84304	0.425364	1
Solyc02g085535	SL3.0ch02	49022316	49024316	-	396	3710	162	3718	9.644	4.175	-5.46917	2.09913e-21	-5.12548e-15	-3.86883	1	1
Solyc02g085540	SL3.0ch02	49021334	49023334	-	1486	3285	2169	5559	31.147	28.067	-3.07974	0.000207772	0.352781	7.63039	0.225301	0.847598
Solyc02g085550	SL3.0ch02	49023141	49025141	-	391	3511	153	3608	10.021	4.068	-5.95244	6.266e-24	-5.12548e-15	-3.59657	1	1
Solyc02g085560	SL3.0ch02	49022124	49024124	+	398	3828	191	4495	9.418	4.076	-5.34192	2.13334e-23	-0.243369	4.29054	0.544784	1
Solyc02g085580	SL3.0ch02	49046577	49048577	+	923	8420	817	10623	9.879	7.142	-2.73745	4.28986e-12	-1.34536	2.06931	0.0312383	0.280588
Solyc02g085590	SL3.0ch02	49058482	49060482	-	2467	5869	2736	7533	29.595	26.643	-2.95123	9.13355e-06	6.89486	0.494518	5.36868e-06	0.000397228
Solyc02g085600	SL3.0ch02	49065312	49067312	+	1052	2642	1221	4462	28.479	21.485	-6.99348	5.20763e-14	1.86544	6.14515	1.21816e-07	1.88619e-05
Solyc02g085630	SL3.0ch02	49098263	49100263	+	1340	2049	1594	3585	39.54	30.778	-8.76154	3.59833e-16	-1.22976	1.71477	0.290694	0.956964
Solyc02g085670	SL3.0ch02	49132306	49134306	+	6149	6598	7186	8187	48.239	46.744	-1.49451	0.00764391	-0.403731	3.14393	0.322571	1
Solyc02g085672	SL3.0ch02	49139515	49141515	-	48	832	0	80	5.455	0	-5.45455	0.015633	4.29479	-2.77447	0.0711923	0.467276
Solyc02g085710	SL3.0ch02	49159046	49161046	+	951	2113	672	4098	31.038	14.088	-16.9498	1.10571e-69	0.585707	2.38194	0.210252	0.820231
Solyc02g085780	SL3.0ch02	49199954	49201954	-	3566	4816	4839	8170	42.544	37.197	-5.34622	2.04853e-14	-0.0653751	5.76981	0.809464	1
Solyc02g085790	SL3.0ch02	49200112	49202112	+	3563	4764	4816	7765	42.789	38.28	-4.50857	1.70445e-10	-0.401217	6.57168	0.148829	0.695133
Solyc02g085800	SL3.0ch02	49212229	49214229	+	1876	6770	2700	10644	21.698	20.234	-1.46408	0.00578286	-5.12548e-15	-3.76036	1	1
Solyc02g085850	SL3.0ch02	49271588	49273588	+	296	347	5783	9432	46.034	38.009	-8.02567	4.57357e-05	0.358393	1.18536	0.502698	1
Solyc02g085880	SL3.0ch02	49303403	49305403	+	497	4609	703	9980	9.734	6.581	-3.1531	1.68816e-11	-5.12548e-15	-1.98882	1	1
Solyc02g085910	SL3.0ch02	49329623	49331623	-	4645	3086	5730	4091	60.083	58.344	-1.73842	0.0118263	-0.869306	3.87305	0.0729563	0.47315
Solyc02g085980	SL3.0ch02	49421712	49423712	-	437	2333	378	2368	15.776	13.765	-2.0107	0.0202465	-3.80558	-3.46877	0.396143	1
Solyc02g086190	SL3.0ch02	49569057	49571057	+	4385	12232	5179	15664	26.389	24.848	-1.54097	0.000544646	2.5657	-3.8312	0.65044	1
Solyc02g086200	SL3.0ch02	49571307	49573307	+	3554	4703	2753	4890	43.042	36.02	-7.02238	8.04022e-19	1.81218	-3.83241	1	1
Solyc02g086225	SL3.0ch02	49595235	49597235	-	41	416	19	334	8.972	5.382	-3.58912	0.0305982	-0.95457	1.39258	0.068105	0.454983
Solyc02g086250	SL3.0ch02	49611496	49613496	-	3428	3540	2780	3189	49.196	46.574	-2.62236	0.00207635	1.37777	1.80263	0.0423475	0.340532
Solyc02g086260	SL3.0ch02	49614136	49616136	-	4794	5889	4023	5758	44.875	41.131	-3.74427	9.81252e-08	-0.179632	4.09419	0.608978	1
Solyc02g086270	SL3.0ch02	49620515	49622515	-	516	8085	418	9933	5.999	4.038	-1.96105	1.20311e-09	2.21545	4.43425	0.00612137	0.0902028
Solyc02g086300	SL3.0ch02	49634492	49636492	-	4775	4765	4119	4743	50.052	46.479	-3.57306	1.56923e-06	2.35535	7.86608	0.000208299	0.00704867
Solyc02g086315	SL3.0ch02	49644186	49646186	-	84	452	2	78	15.672	2.5	-13.1716	0.000363901	-0.257992	1.47278	0.700031	1
Solyc02g086320	SL3.0ch02	49644476	49646476	-	84	452	2	78	15.672	2.5	-13.1716	0.000363901	-0.407404	3.09698	0.248736	0.888029
Solyc02g086330	SL3.0ch02	49654774	49656774	-	11176	6994	12636	8247	61.508	60.509	-0.999433	0.0235495	-0.49783	4.35695	0.278265	0.938165
Solyc02g086385	SL3.0ch02	49681735	49683735	-	4278	8210	3673	8280	34.257	30.729	-3.5282	6.83046e-09	-1.9918	-3.6499	1	1
Solyc02g086390	SL3.0ch02	49681735	49683735	-	4278	8210	3673	8280	34.257	30.729	-3.5282	6.83046e-09	-5.12548e-15	-3.70003	1	1
Solyc02g086430	SL3.0ch02	49731450	49733450	+	641	5047	488	4579	11.269	9.631	-1.63839	0.00394776	-5.12548e-15	-3.83813	1	1
Solyc02g086450	SL3.0ch02	49755437	49757437	-	12461	6712	14104	8886	64.992	61.348	-3.64402	3.82157e-14	4.03006	-1.01846	0.111563	0.596189
Solyc02g086490	SL3.0ch02	49800676	49802676	+	662	3391	793	4650	16.334	14.569	-1.76441	0.0114363	-0.918862	2.58976	1	1
Solyc02g086500	SL3.0ch02	49803663	49805663	+	6934	8163	8407	10428	45.93	44.635	-1.29467	0.0104413	-0.807861	5.33467	0.00681548	0.0975495
Solyc02g086513	SL3.0ch02	49823756	49825756	-	15	108	7	427	12.195	1.613	-10.5822	3.32529e-06	0.570753	0.804372	0.450752	1
Solyc02g086530	SL3.0ch02	49838823	49840823	-	2688	8747	2664	9672	23.507	21.595	-1.91145	0.000354792	3.32602	0.0758249	0.0450899	0.354612
Solyc02g086580	SL3.0ch02	49866098	49868098	+	3725	2235	2762	1987	62.5	58.16	-4.34039	5.73582e-06	-5.12548e-15	-3.50486	1	1
Solyc02g086670	SL3.0ch02	49964742	49966742	-	88	3244	35	1906	2.641	1.803	-0.837862	0.0304544	-0.133111	6.38129	0.646016	1
Solyc02g086683	SL3.0ch02	49976442	49978442	+	8728	7770	9581	9039	52.903	51.455	-1.44796	0.00434248	-5.12548e-15	-3.91086	1	1
Solyc02g086690	SL3.0ch02	49976442	49978442	+	8728	7770	9581	9039	52.903	51.455	-1.44796	0.00434248	-5.12548e-15	-3.91086	1	1
Solyc02g086720	SL3.0ch02	49996456	49998456	-	4715	2566	4075	2634	64.758	60.739	-4.01828	1.17389e-06	-5.12548e-15	-3.91086	1	1
Solyc02g086740	SL3.0ch02	49999108	50001108	+	5839	7246	6695	9268	44.624	41.941	-2.68288	5.11536e-06	0.413809	0.737825	0.485768	1
Solyc02g086750	SL3.0ch02	50001734	50003734	+	140	1155	63	1014	10.811	5.85	-4.96123	1.73526e-05	-0.685046	5.79802	0.0329247	0.289848
Solyc02g086770	SL3.0ch02	50023849	50025849	-	10197	7531	10319	7973	57.519	56.413	-1.10654	0.0189172	3.95661	0.893896	0.00147807	0.0319057
Solyc02g086820	SL3.0ch02	50069796	50071796	+	117	1513	93	1731	7.178	5.099	-2.07923	0.00753827	-1.9509	-3.28455	0.540601	1
Solyc02g086840	SL3.0ch02	50086030	50088030	-	4311	7499	4278	9933	36.503	30.103	-6.39952	9.60922e-27	2.55512	-3.44027	0.69644	1
Solyc02g086880	SL3.0ch02	50120390	50122390	+	4159	10695	4135	12232	27.999	25.264	-2.73494	7.35232e-08	0.790116	8.99482	0.0270971	0.257162
Solyc02g086990	SL3.0ch02	50187796	50189796	-	4708	5474	5019	6368	46.238	44.077	-2.16188	0.00107245	-2.26083	3.85458	7.12087e-07	7.8369e-05
Solyc02g087030	SL3.0ch02	50211693	50213693	+	939	5294	755	6306	15.065	10.693	-4.37244	1.66255e-13	-0.18522	1.312	0.761407	1
Solyc02g087040	SL3.0ch02	50219099	50221099	-	1067	9061	958	11791	10.535	7.514	-3.02084	6.21214e-15	0.346982	1.95296	0.606411	1
Solyc02g087080	SL3.0ch02	50241070	50243070	+	4408	9154	4374	9625	32.503	31.245	-1.25749	0.0144086	-5.12548e-15	-3.91086	1	1
Solyc02g087090	SL3.0ch02	50248749	50250749	+	1545	1882	1459	2702	45.083	35.064	-10.0195	3.40665e-18	3.50257	-3.6514	0.396292	1
Solyc02g087100	SL3.0ch02	50252530	50254530	+	6651	5200	6238	6330	56.122	49.634	-6.48786	2.5293e-23	-5.12548e-15	-3.91086	1	1
Solyc02g087110	SL3.0ch02	50254410	50256410	+	2201	4145	2187	5473	34.683	28.551	-6.13235	2.75295e-14	3.48841	-2.23803	0.141002	0.673615
Solyc02g087180	SL3.0ch02	50294131	50296131	+	48	1707	10	1444	2.735	0.688	-2.04728	7.89451e-06	-0.9533	3.35873	0.0136453	0.160442
Solyc02g087190	SL3.0ch02	50300820	50302820	+	9776	8456	10223	9352	53.62	52.225	-1.39523	0.00429506	0.843201	5.40398	0.0561095	0.405302
Solyc02g087200	SL3.0ch02	50307024	50309024	-	5968	6725	7776	9186	47.018	45.844	-1.17439	0.0244151	0.154525	4.19386	0.662182	1
Solyc02g087230	SL3.0ch02	50324434	50326434	-	5527	10059	5297	10807	35.461	32.892	-2.56886	1.82279e-06	-0.00501267	5.82149	0.986872	1
Solyc02g087280	SL3.0ch02	50370435	50372435	-	1471	3547	1849	5176	29.314	26.32	-2.99418	0.000243317	-0.236028	2.97872	0.672973	1
Solyc02g087300	SL3.0ch02	50382989	50384989	+	35	667	6	613	4.986	0.969	-4.01645	1.88999e-05	0.199985	6.69946	0.450709	1
Solyc02g087340	SL3.0ch02	50407119	50409119	+	3036	9590	2538	9751	24.046	20.653	-3.393	2.87918e-10	-0.15824	7.53429	0.560314	1
Solyc02g087370	SL3.0ch02	50458432	50460432	-	77	1995	49	2325	3.716	2.064	-1.65219	0.000786321	-1.02214	-3.59772	0.752593	1
Solyc02g087420	SL3.0ch02	50510861	50512861	+	4619	4661	4545	4850	49.774	48.377	-1.39691	0.0299162	0.836194	3.34268	0.0394266	0.325083
Solyc02g087490	SL3.0ch02	50556843	50558843	-	264	1802	247	1980	12.778	11.091	-1.68716	0.0448986	4.90392	-3.42307	0.0241299	0.237371
Solyc02g087500	SL3.0ch02	50562671	50564671	-	581	2262	393	1875	20.436	17.328	-3.10812	0.00339668	0.493659	-1.51486	0.584086	1
Solyc02g087510	SL3.0ch02	50567290	50569290	-	2538	6464	2351	6483	28.194	26.613	-1.58065	0.0109801	1.38852	1.28784	0.0181265	0.195665
Solyc02g087520	SL3.0ch02	50568561	50570561	+	2386	6195	1943	5876	27.806	24.85	-2.95589	1.92828e-05	-4.17606	-3.5389	0.241628	0.875551
Solyc02g087530	SL3.0ch02	50572792	50574792	+	8681	5221	9240	5941	62.444	60.866	-1.5787	0.00372068	3.41846	-3.36216	0.40071	1
Solyc02g087540	SL3.0ch02	50584938	50586938	-	2799	6233	2155	5647	30.99	27.621	-3.36869	2.07285e-06	2.75213	7.63563	5.22144e-05	0.00242715
Solyc02g087570	SL3.0ch02	50605274	50607274	-	3994	8805	3890	10096	31.206	27.814	-3.39204	2.23099e-09	-5.12548e-15	-3.91086	1	1
Solyc02g087580	SL3.0ch02	50605860	50607860	+	4136	9470	4039	9952	30.398	28.869	-1.5298	0.00353805	3.0367	1.41725	0.0109062	0.137406
Solyc02g087600	SL3.0ch02	50611574	50613574	+	64	1345	36	1296	4.542	2.703	-1.83953	0.00661908	-1.09786	2.25019	0.0483268	0.369876
Solyc02g087650	SL3.0ch02	50652182	50654182	+	5238	4057	5758	4810	56.353	54.485	-1.86764	0.00533984	-5.12548e-15	-3.91086	1	1
Solyc02g087660	SL3.0ch02	50659084	50661084	-	7146	5555	8267	7202	56.263	53.442	-2.82092	2.67545e-06	0.200809	-0.304077	0.857905	1
Solyc02g087665	SL3.0ch02	50653968	50655968	+	1896	2703	1844	3139	41.226	37.006	-4.22053	2.49247e-05	-5.12548e-15	-3.79652	1	1
Solyc02g087670	SL3.0ch02	50658977	50660977	+	7146	5555	8269	7295	56.263	53.129	-3.13427	2.01434e-07	1.9327	-2.60007	1	1
Solyc02g087710	SL3.0ch02	50673482	50675482	-	14	445	1	387	3.05	0.258	-2.79238	0.00177042	1.39112	6.87383	0.000276193	0.00886794
Solyc02g087810	SL3.0ch02	50723600	50725600	+	197	1522	28	417	11.46	6.292	-5.16802	0.000885483	-1.3197	-0.340841	0.183173	0.770352
Solyc02g087820	SL3.0ch02	50725107	50727107	+	113	1163	5	355	8.856	1.389	-7.46691	7.54844e-08	-5.12548e-15	-3.91086	1	1
Solyc02g087840	SL3.0ch02	50737235	50739235	-	2031	6255	1981	8621	24.511	18.685	-5.82607	2.49559e-21	2.5809	5.74442	1.07467e-05	0.000692589
Solyc02g087850	SL3.0ch02	50750677	50752677	+	1715	6022	1074	5518	22.166	16.292	-5.87374	3.19903e-18	1.2252	5.9424	0.00488938	0.0775109
Solyc02g087890	SL3.0ch02	50792860	50794860	-	1968	6266	2019	6864	23.901	22.729	-1.17209	0.0361253	1.83223	-3.69601	1	1
Solyc02g087935	SL3.0ch02	50816056	50818056	-	5175	1660	4756	2243	75.713	67.953	-7.76068	2.74522e-23	-5.12548e-15	-3.91086	1	1
Solyc02g087950	SL3.0ch02	50824919	50826919	-	1129	3914	954	3932	22.387	19.525	-2.86229	0.000369426	1.43638	4.92158	0.0156442	0.176462
Solyc02g087940	SL3.0ch02	50814610	50816610	+	9904	6966	9704	7739	58.708	55.633	-3.07513	1.46397e-08	-5.12548e-15	-3.91086	1	1
Solyc02g087960	SL3.0ch02	50832914	50834914	+	489	689	636	2385	41.511	21.053	-20.4584	5.8806e-38	0.372812	4.64484	0.256101	0.901762
Solyc02g087970	SL3.0ch02	50841160	50843160	+	1449	4155	1191	3803	25.857	23.849	-2.00791	0.01009	0.208286	10.0839	0.571744	1
Solyc02g087990	SL3.0ch02	50857486	50859486	+	70	130	96	698	35	12.091	-22.9093	1.31783e-12	4.56056	-1.85879	0.105456	0.578438
Solyc02g088010	SL3.0ch02	50881791	50883791	-	934	5732	746	5208	14.011	12.529	-1.48201	0.00877191	-0.381722	4.62827	0.162302	0.723848
Solyc02g088050	SL3.0ch02	50900482	50902482	-	395	1765	419	2322	18.287	15.286	-3.00065	0.00352011	-5.12548e-15	-3.86962	1	1
Solyc02g088090	SL3.0ch02	50914676	50916676	+	258	2757	59	2452	8.557	2.35	-6.20755	8.71931e-24	0.552698	6.51681	0.262171	0.911571
Solyc02g088100	SL3.0ch02	50928715	50930715	-	5230	5403	5046	5549	49.186	47.626	-1.56026	0.0134343	2.45556	7.19672	3.94267e-06	0.000309369
Solyc02g088110	SL3.0ch02	50936152	50938152	-	177	1470	94	982	10.747	8.736	-2.01075	0.0445999	-0.516063	4.51588	0.0934906	0.540484
Solyc02g088140	SL3.0ch02	50954014	50956014	+	9037	7359	9948	8431	55.117	54.127	-0.990109	0.0336424	2.9828	-1.2273	0.0398718	0.32717
Solyc02g088150	SL3.0ch02	50955449	50957449	+	4753	1875	4159	2264	71.711	64.752	-6.95925	6.45968e-17	-2.461	-1.69221	0.177978	0.758842
Solyc02g088210	SL3.0ch02	51005851	51007851	+	7060	2784	9049	3769	71.719	70.596	-1.12278	0.0334814	0.00415067	2.64815	1	1
Solyc02g088230	SL3.0ch02	51031092	51033092	-	2304	8920	2673	11202	20.527	19.265	-1.26258	0.00786858	1.52532	4.15794	0.00593898	0.088494
Solyc02g088360	SL3.0ch02	51116307	51118307	+	7179	7834	10133	12250	47.819	45.271	-2.54759	1.62548e-06	-5.26268	-1.64837	0.0208545	0.21588
Solyc02g088370	SL3.0ch02	51116817	51118817	+	5593	5775	8023	9328	49.2	46.239	-2.9601	1.15992e-06	0.0846518	-1.3637	1	1
Solyc02g088380	SL3.0ch02	51120148	51122148	-	913	5836	867	6877	13.528	11.196	-2.33217	2.23975e-05	2.0071	5.80474	2.78221e-05	0.00148307
Solyc02g088390	SL3.0ch02	51125123	51127123	-	768	3807	622	3893	16.787	13.776	-3.01058	6.66738e-05	0.690754	5.75113	0.104689	0.577057
Solyc02g088423	SL3.0ch02	51155143	51157143	+	332	3148	210	2324	9.54	8.287	-1.25294	0.0497435	-5.12548e-15	-3.91086	1	1
Solyc02g088427	SL3.0ch02	51175481	51177481	+	859	1209	762	1277	41.538	37.371	-4.16646	0.00426786	-0.465912	1.18897	0.334318	1
Solyc02g088510	SL3.0ch02	51218920	51220920	+	3093	7212	2485	6689	30.015	27.087	-2.92714	7.07224e-06	-0.612338	2.78933	0.193458	0.789277
Solyc02g088610	SL3.0ch02	51288619	51290619	-	1785	3663	1481	4275	32.764	25.73	-7.03464	1.09648e-15	-0.0256482	8.15228	0.953246	1
Solyc02g088660	SL3.0ch02	51313191	51315191	-	411	2073	399	2425	16.546	14.129	-2.417	0.00945983	-0.158523	4.49808	0.611274	1
Solyc02g088700	SL3.0ch02	51325706	51327706	+	4786	6133	5406	7321	43.832	42.477	-1.35523	0.019942	0.145444	6.63854	0.609554	1
Solyc02g088720	SL3.0ch02	51334723	51336723	+	2265	3694	1969	3445	38.01	36.369	-1.64106	0.0363786	-0.290244	5.51215	0.276223	0.934537
Solyc02g088920	SL3.0ch02	51484236	51486236	-	6690	7377	6343	7614	47.558	45.447	-2.11139	0.000330003	0.247744	3.6257	0.502469	1
Solyc02g088940	SL3.0ch02	51492304	51494304	+	110	2395	40	2462	4.391	1.599	-2.7925	9.74289e-09	0.107246	5.6008	0.757859	1
Solyc02g088952	SL3.0ch02	51508753	51510753	+	104	1288	4	184	7.471	2.128	-5.3436	0.00323628	-5.12548e-15	-3.91086	1	1
Solyc02g088954	SL3.0ch02	51510415	51512415	+	97	484	14	219	16.695	6.009	-10.6868	2.48109e-05	2.63023	-3.43902	0.64095	1
Solyc02g089020	SL3.0ch02	51563113	51565113	+	2991	6137	3290	7403	32.767	30.768	-1.99952	0.00186191	-0.685065	1.76658	0.280554	0.941711
Solyc02g089040	SL3.0ch02	51570229	51572229	+	2730	10561	2911	11913	20.54	19.637	-0.90314	0.0313902	0.381619	-0.845553	1	1
Solyc02g089050	SL3.0ch02	51578702	51580702	-	1169	5149	1088	5877	18.503	15.621	-2.88173	1.15445e-05	-0.625974	-1.03905	0.710936	1
Solyc02g089080	SL3.0ch02	51618605	51620605	+	1327	2020	1098	2130	39.647	34.015	-5.63258	2.64132e-06	-0.0362504	2.0223	0.935273	1
Solyc02g089075	SL3.0ch02	51620463	51622463	+	3045	5602	3510	7444	35.215	32.043	-3.17144	3.54368e-06	-2.03921	-1.6219	0.153215	0.705075
Solyc02g089090	SL3.0ch02	51625650	51627650	+	5933	3881	6377	4541	60.454	58.408	-2.04632	0.00194152	-0.291071	6.76628	0.329427	1
Solyc02g089115	SL3.0ch02	51643819	51645819	+	3691	6343	4179	7815	36.785	34.842	-1.94251	0.00191502	-1.33246	3.44818	0.0078459	0.107819
Solyc02g089150	SL3.0ch02	51656942	51658942	+	2702	6815	2918	8025	28.391	26.665	-1.72585	0.00388926	-0.660707	4.1823	0.108071	0.58619
Solyc02g089160	SL3.0ch02	51679488	51681488	+	637	3111	264	1804	16.996	12.766	-4.22977	1.86778e-05	-0.339254	6.24841	0.502529	1
Solyc02g089170	SL3.0ch02	51685985	51687985	+	8740	10922	11025	14289	44.451	43.553	-0.898251	0.0303341	-5.12548e-15	-3.91086	1	1
Solyc02g089175	SL3.0ch02	51698496	51700496	-	4559	13139	4896	14854	25.76	24.79	-0.970099	0.0173641	0.205642	5.70085	0.47804	1
Solyc02g089190	SL3.0ch02	51702661	51704661	+	5443	5805	5104	5808	48.391	46.774	-1.61663	0.00952206	-5.12548e-15	-3.64424	1	1
Solyc02g089210	SL3.0ch02	51724177	51726177	+	4010	8061	4153	8995	33.22	31.587	-1.63356	0.00374305	0.0886437	0.403718	0.924049	1
Solyc02g089240	SL3.0ch02	51746052	51748052	-	1933	8263	1640	9460	18.958	14.775	-4.18364	1.30845e-15	-0.457165	5.74567	0.0987483	0.557278
Solyc02g089290	SL3.0ch02	51799225	51801225	-	7962	8406	7951	8804	48.644	47.454	-1.1892	0.0173808	0.45307	5.67659	0.117791	0.612909
Solyc02g089295	SL3.0ch02	51798660	51800660	-	7854	9150	8215	10210	46.189	44.586	-1.60297	0.00174794	-5.12548e-15	-3.91086	1	1
Solyc02g089340	SL3.0ch02	51822230	51824230	+	7	232	0	138	2.929	0	-2.92887	0.0269312	-0.593444	3.7662	0.104508	0.576589
Solyc02g089360	SL3.0ch02	51845635	51847635	-	4505	8917	4328	9360	33.564	31.619	-1.94536	0.000506493	-0.362013	5.74734	0.232934	0.860168
Solyc02g089415	SL3.0ch02	51895964	51897964	-	3962	2047	4182	2335	65.934	64.171	-1.7638	0.0213496	0.0278755	-1.12647	1	1
Solyc02g089450	SL3.0ch02	51907418	51909418	-	3937	5684	4292	6962	40.921	38.138	-2.78335	4.07625e-05	4.41812	-2.06112	0.0901366	0.529825
Solyc02g089460	SL3.0ch02	51910688	51912688	-	599	6543	524	7140	8.387	6.837	-1.54985	0.000318868	0.5692	0.686018	0.41693	1
Solyc02g089470	SL3.0ch02	51924313	51926313	-	3325	9988	3949	12912	24.976	23.421	-1.55468	0.00125243	1.57012	1.55016	0.0111683	0.139725
Solyc02g089500	SL3.0ch02	51945731	51947731	-	31	44	0	123	41.333	0	-41.3333	2.61822e-15	-1.01459	-0.291243	0.228135	0.852478
Solyc02g089497	SL3.0ch02	51951364	51953364	-	11	33	15	257	25	5.515	-19.4853	0.000156248	0.194667	0.513812	0.77792	1
Solyc02g089515	SL3.0ch02	51951448	51953448	+	11	33	15	247	25	5.725	-19.2748	0.000206634	-1.61484	-3.17914	0.436399	1
Solyc02g089630	SL3.0ch02	52019762	52021762	-	1172	5715	1181	6500	17.018	15.376	-1.64197	0.00464678	0.259317	9.0696	0.613559	1
Solyc02g089650	SL3.0ch02	52040575	52042575	+	13324	9041	16130	11826	59.575	57.698	-1.87742	2.20263e-05	0.0176361	2.63645	0.973113	1
Solyc02g089680	SL3.0ch02	52069656	52071656	+	6063	8925	6872	10558	40.452	39.426	-1.02609	0.0315557	1.4489	6.37355	0.00192255	0.0391969
Solyc02g089700	SL3.0ch02	52079199	52081199	+	563	3643	433	4689	13.386	8.454	-4.93191	6.79434e-14	-5.12548e-15	-3.45142	1	1
Solyc02g089720	SL3.0ch02	52094046	52096046	+	8585	7532	9007	8898	53.267	50.304	-2.96235	7.30718e-08	-0.152816	6.51538	0.627206	1
Solyc02g089730	SL3.0ch02	52100437	52102437	+	3461	7796	4041	9983	30.745	28.815	-1.93043	0.000671203	2.10441	0.306913	0.0861672	0.516772
Solyc02g089850	SL3.0ch02	52187975	52189975	+	201	3424	152	3138	5.545	4.62	-0.924767	0.0449438	-0.478162	3.6015	0.186186	0.77608
Solyc02g089860	SL3.0ch02	52200211	52202211	-	2171	7192	1780	8299	23.187	17.66	-5.52653	7.70826e-21	5.96742	-0.677355	0.00512026	0.0798698
Solyc02g089870	SL3.0ch02	52200144	52202144	+	2168	6975	1767	7892	23.712	18.294	-5.41831	3.958e-19	-0.404714	4.90539	0.180393	0.764214
Solyc02g089890	SL3.0ch02	52220494	52222494	-	520	4185	414	4324	11.052	8.738	-2.31421	0.000146284	-0.25498	2.54378	0.567074	1
Solyc02g089900	SL3.0ch02	52219758	52221758	+	517	3750	419	4209	12.116	9.054	-3.06265	3.38471e-06	2.67378	6.34498	3.29715e-06	0.000266213
Solyc02g089960	SL3.0ch02	52279490	52281490	+	56	2378	16	1151	2.301	1.371	-0.929703	0.0378868	-0.291558	-2.3781	0.871221	1
Solyc02g089970	SL3.0ch02	52293158	52295158	-	891	3623	843	3979	19.739	17.482	-2.25622	0.00340226	-0.43104	4.47816	0.29426	0.961386
Solyc02g089990	SL3.0ch02	52315398	52317398	-	1715	5740	1826	6947	23.005	20.814	-2.19083	0.000603705	1.4415	5.08522	0.00189973	0.0389172
Solyc02g090010	SL3.0ch02	52329042	52331042	-	12389	7486	14147	8984	62.335	61.16	-1.17424	0.00760497	0.478537	4.83676	0.122506	0.625705
Solyc07g032640	SL3.0ch02	52337320	52339320	-	10526	6435	11859	7755	62.06	60.462	-1.59811	0.00129435	0.0807224	7.10737	0.890825	1
Solyc02g090040	SL3.0ch02	52337152	52339152	+	10511	5494	11831	6783	65.673	63.56	-2.11354	4.10673e-05	-0.802892	2.65562	0.0516739	0.385234
Solyc02g090110	SL3.0ch02	52373159	52375159	-	14154	8654	15379	10720	62.057	58.926	-3.13154	4.28049e-12	1.69168	4.83699	0.00629801	0.0920962
Solyc02g090150	SL3.0ch02	52424148	52426148	+	8480	6523	11046	8995	56.522	55.117	-1.40502	0.00552698	-5.12548e-15	-2.77219	1	1
Solyc02g090160	SL3.0ch02	52429318	52431318	+	5685	7370	5924	8498	43.547	41.076	-2.4704	3.44784e-05	-0.332286	5.21089	0.304259	0.975854
Solyc02g090200	SL3.0ch02	52467671	52469671	-	10558	7417	12000	8726	58.737	57.898	-0.838843	0.0477582	-0.0682421	3.06668	0.869301	1
Solyc02g090260	SL3.0ch02	52495605	52497605	+	1940	3263	1802	3381	37.286	34.768	-2.51867	0.00498115	0.36959	3.20201	0.452772	1
Solyc02g090400	SL3.0ch02	52599856	52601856	+	4751	8396	5153	10250	36.138	33.455	-2.683	2.52296e-06	3.3809	3.02589	3.37437e-06	0.000271835
Solyc02g090430	SL3.0ch02	52625877	52627877	+	3857	8025	3712	8922	32.461	29.381	-3.07983	2.52909e-07	5.80998	1.3315	2.09881e-06	0.000188146
Solyc02g090545	SL3.0ch02	52720359	52722359	-	2751	4386	2859	4879	38.546	36.948	-1.59808	0.0245547	0.330988	-2.25222	1	1
Solyc02g090550	SL3.0ch02	52720968	52722968	+	2829	3639	2799	3880	43.738	41.907	-1.83093	0.0190215	-5.12548e-15	-3.91086	1	1
Solyc02g090600	SL3.0ch02	52788679	52790679	-	1207	5307	926	5054	18.529	15.485	-3.04437	7.35823e-06	-5.12548e-15	-3.91086	1	1
Solyc02g090650	SL3.0ch02	52833159	52835159	-	77	1746	22	1354	4.224	1.599	-2.62497	1.82504e-05	-0.535393	4.97291	0.0863741	0.517417
Solyc02g090660	SL3.0ch02	52836604	52838604	-	15	208	3	221	6.726	1.339	-5.38717	0.00248373	-2.95119	-3.72381	0.629929	1
Solyc02g090670	SL3.0ch02	52845203	52847203	-	8162	3933	10593	5443	67.482	66.058	-1.42481	0.00747127	0.184241	4.86886	0.554532	1
[truncated: 6,623 more rows]

## Sheet: PHYA_hyper_DMP_BK_All
Supplementary Table 13. Total differentially methylated promoters (DMPs) in breaker fruits in all mC contexts
ID	chr	from	to	strand	met_WT	unmet_WT	met_PHYA	unmet_PHYA	X.met_WT	X.met_PHYA	X.diff_PHYA.ctrl	FDR_diff_PHYA.WT	logFC_PHYA	logCPM_PHYA	PValue_PHYA	padj_PHYA
Solyc00g005080	SL3.0ch00	791775	793775	-	709	2215	941	1905	24.248	33.064	8.81634	3.70577e-13	-5.12548e-15	-3.47704	1	1
Solyc00g005084	SL3.0ch00	807592	809592	+	1708	4503	1852	3848	27.5	32.491	4.99163	5.25508e-09	-5.12548e-15	-3.91086	1	1
Solyc00g005092	SL3.0ch00	1125793	1127793	+	1561	6791	2169	8770	18.69	19.828	1.138	0.0261067	-2.25254	-1.17336	0.146312	0.687958
Solyc00g005094	SL3.0ch00	1146952	1148952	-	6291	7593	8110	9036	45.311	47.3	1.98851	0.000381821	-1.48798	5.51214	0.0117285	0.144607
Solyc00g005096	SL3.0ch00	1732561	1734561	+	2602	7810	3623	9526	24.99	27.553	2.56303	9.85674e-06	-5.12548e-15	-3.91086	1	1
Solyc00g005280	SL3.0ch00	2188964	2190964	+	1215	1013	1747	1152	54.533	60.262	5.72895	3.83387e-05	-5.12548e-15	-3.91086	1	1
Solyc00g005283	SL3.0ch00	2354618	2356618	-	1468	3545	1575	3096	29.284	33.719	4.43483	3.19726e-06	2.22146	-3.22629	0.328961	1
Solyc00g005285	SL3.0ch00	2356500	2358500	-	1166	2506	1587	3048	31.754	34.239	2.48567	0.0104444	1.80909	-3.87049	1	1
Solyc00g005287	SL3.0ch00	2357974	2359974	-	1506	5317	1710	5494	22.072	23.737	1.66441	0.011499	3.47386	-3.3494	0.274026	0.93165
Solyc00g005440	SL3.0ch00	2365409	2367409	-	2041	3889	2556	4495	34.418	36.25	1.83196	0.0166792	-5.12548e-15	-3.91086	1	1
Solyc00g005445	SL3.0ch00	2377779	2379779	-	1166	2081	1448	1741	35.91	45.406	9.49601	3.08562e-14	-5.12548e-15	-3.91086	1	1
Solyc00g005460	SL3.0ch00	2490753	2492753	-	2408	4483	1941	3192	34.944	37.814	2.87001	0.000932214	-5.12548e-15	-3.91086	1	1
Solyc00g005470	SL3.0ch00	2491481	2493481	-	2048	3420	1837	2629	37.454	41.133	3.67873	0.000168979	-5.12548e-15	-3.91086	1	1
Solyc00g005840	SL3.0ch00	3431254	3433254	-	3577	9048	3513	8147	28.333	30.129	1.79597	0.00153347	1.04419	3.84267	0.0144073	0.166932
Solyc00g005850	SL3.0ch00	3432603	3434603	-	4646	10857	4604	9599	29.968	32.416	2.44729	6.18713e-06	-5.12548e-15	-3.91086	1	1
Solyc00g005890	SL3.0ch00	3566909	3568909	-	2426	3704	3398	4495	39.576	43.051	3.47495	3.51078e-05	-5.12548e-15	-3.83813	1	1
Solyc00g005900	SL3.0ch00	3739496	3741496	-	1110	2447	2165	3745	31.206	36.633	5.42675	1.09279e-07	-5.12548e-15	-3.91086	1	1
Solyc00g006020	SL3.0ch00	3943107	3945107	+	2315	3614	3757	4749	39.045	44.169	5.12345	1.60707e-09	-5.12548e-15	-3.91086	1	1
Solyc00g005903	SL3.0ch00	4162096	4164096	+	17183	11302	23276	13528	60.323	63.243	2.92015	8.20689e-14	-5.12548e-15	-3.91086	1	1
Solyc00g005907	SL3.0ch00	4172134	4174134	+	18828	13188	29614	15760	58.808	65.266	6.45836	9.10109e-73	-5.12548e-15	-3.91086	1	1
Solyc00g006480	SL3.0ch00	4232311	4234311	+	287	1714	293	1250	14.343	18.989	4.64615	0.000204932	-5.12548e-15	-3.91086	1	1
Solyc00g006483	SL3.0ch00	4286251	4288251	-	1859	3562	2356	4102	34.293	36.482	2.18932	0.00788137	-5.12548e-15	-3.91086	1	1
Solyc00g006487	SL3.0ch00	4287311	4289311	-	3820	5228	4283	5169	42.219	45.313	3.09389	2.23834e-05	-5.12548e-15	-3.91086	1	1
Solyc00g006540	SL3.0ch00	4386391	4388391	-	2116	4778	2857	5447	30.693	34.405	3.71175	1.54592e-06	-5.12548e-15	-3.91086	1	1
Solyc00g006550	SL3.0ch00	4529463	4531463	-	1424	5310	2041	6170	21.146	24.857	3.71048	1.21341e-07	-5.12548e-15	-3.91086	1	1
Solyc00g006650	SL3.0ch00	5617777	5619777	-	2260	1933	4220	2816	53.899	59.977	6.0779	6.69798e-10	-5.12548e-15	-3.91086	1	1
Solyc00g006655	SL3.0ch00	5619735	5621735	-	693	619	1856	1205	52.82	60.634	7.81366	2.03673e-06	-5.12548e-15	-3.91086	1	1
Solyc00g006800	SL3.0ch00	5775062	5777062	+	7149	5105	9224	6152	58.34	59.99	1.64946	0.00375553	0.401219	5.65501	0.183109	0.770352
Solyc00g006805	SL3.0ch00	5780749	5782749	-	5862	5989	5268	5036	49.464	51.126	1.6616	0.00825603	0.286101	-2.36692	0.862923	1
Solyc00g006830	SL3.0ch00	5838523	5840523	-	2951	4292	4435	5312	40.743	45.501	4.75839	1.22225e-09	0.163797	5.24288	0.542988	1
Solyc00g006850	SL3.0ch00	6240615	6242615	-	3594	7991	3423	6093	31.023	35.971	4.94812	1.08493e-13	-5.12548e-15	-3.91086	1	1
Solyc00g006860	SL3.0ch00	6280339	6282339	-	1375	3699	983	2259	27.099	30.321	3.22185	0.00111408	-5.12548e-15	-3.91086	1	1
Solyc00g006867	SL3.0ch00	6390079	6392079	+	246	6261	1138	8105	3.781	12.312	8.53148	2.38482e-83	-1.1664	-0.558252	0.264941	0.916392
Solyc00g006870	SL3.0ch00	6404880	6406880	+	2573	5586	3904	6726	31.536	36.726	5.19052	3.45694e-13	-5.12548e-15	-3.91086	1	1
Solyc00g006880	SL3.0ch00	6433744	6435744	+	1550	3239	1674	3087	32.366	35.161	2.79484	0.00268553	-5.12548e-15	-3.91086	1	1
Solyc00g006890	SL3.0ch00	6446980	6448980	+	2463	3417	3132	3798	41.888	45.195	3.30705	0.000149483	-5.12548e-15	-3.91086	1	1
Solyc00g006900	SL3.0ch00	6518309	6520309	+	1130	2768	1215	2597	28.989	31.873	2.88381	0.00388926	-5.12548e-15	-3.66196	1	1
Solyc00g006907	SL3.0ch00	6571017	6573017	-	859	1197	2427	2483	41.78	49.43	7.64958	9.97267e-09	-5.12548e-15	-3.91086	1	1
Solyc00g007550	SL3.0ch00	6650039	6652039	-	2786	8461	3446	8984	24.771	27.723	2.9522	3.6445e-07	-5.12548e-15	-3.43053	1	1
Solyc00g007560	SL3.0ch00	6672572	6674572	+	3837	5789	5175	6972	39.861	42.603	2.74232	4.39527e-05	-5.12548e-15	-3.91086	1	1
Solyc00g007555	SL3.0ch00	6673303	6675303	+	2994	5378	3589	5718	35.762	38.562	2.80031	0.000111263	-5.12548e-15	-3.91086	1	1
Solyc00g007570	SL3.0ch00	6677501	6679501	-	3259	4497	3428	4342	42.019	44.118	2.09932	0.0054285	-5.12548e-15	-3.91086	1	1
Solyc00g007600	SL3.0ch00	6693238	6695238	-	2620	4194	3967	5048	38.45	44.004	5.55419	5.68834e-12	-4.46906	-3.21208	0.19067	0.783804
Solyc00g007920	SL3.0ch00	6890411	6892411	-	963	849	1344	899	53.146	59.92	6.77405	1.6911e-05	-5.12548e-15	-3.91086	1	1
Solyc00g007930	SL3.0ch00	6919608	6921608	-	2661	3039	4935	4954	46.684	49.904	3.21972	0.000100338	-5.12548e-15	-3.91086	1	1
Solyc00g007950	SL3.0ch00	6926603	6928603	-	489	603	1181	1075	44.78	52.349	7.56907	4.04848e-05	-5.12548e-15	-3.91086	1	1
Solyc00g007970	SL3.0ch00	6941525	6943525	-	1042	847	551	347	55.161	61.359	6.19711	0.00149976	-5.12548e-15	-3.91086	1	1
Solyc00g007980	SL3.0ch00	6942523	6944523	-	592	663	429	394	47.171	52.126	4.95505	0.0157725	-5.12548e-15	-3.91086	1	1
Solyc00g008020	SL3.0ch00	6991194	6993194	-	90	263	282	198	25.496	58.75	33.2542	4.05904e-21	-5.12548e-15	-3.91086	1	1
Solyc00g008030	SL3.0ch00	6993244	6995244	-	938	1938	1299	1971	32.615	39.725	7.11003	1.32478e-08	-5.12548e-15	-3.91086	1	1
Solyc00g008040	SL3.0ch00	7005181	7007181	-	1344	2575	1934	2885	34.294	40.133	5.83834	3.35418e-08	-5.12548e-15	-3.91086	1	1
Solyc00g008055	SL3.0ch00	7069205	7071205	-	11	19	161	87	36.667	64.919	28.2527	0.00304927	-5.12548e-15	-3.91086	1	1
Solyc00g008070	SL3.0ch00	7078627	7080627	+	419	381	741	474	52.375	60.988	8.61265	0.000135811	-5.12548e-15	-3.91086	1	1
Solyc00g008090	SL3.0ch00	7086900	7088900	-	367	878	475	840	29.478	36.122	6.64376	0.000283658	-5.12548e-15	-3.91086	1	1
Solyc00g008100	SL3.0ch00	7087321	7089321	-	1172	2410	1582	2495	32.719	38.803	6.08389	4.70162e-08	-5.12548e-15	-3.91086	1	1
Solyc00g008110	SL3.0ch00	7099931	7101931	-	1179	1066	1510	1176	52.517	56.217	3.70072	0.00605707	-5.12548e-15	-3.91086	1	1
Solyc00g008130	SL3.0ch00	7119747	7121747	-	524	403	269	150	56.526	64.2	7.67405	0.00533153	-5.12548e-15	-3.91086	1	1
Solyc00g008260	SL3.0ch00	7277831	7279831	+	3508	2631	5915	3000	57.143	66.349	9.20599	2.97847e-29	-5.12548e-15	-3.91086	1	1
Solyc00g008265	SL3.0ch00	7289600	7291600	+	3176	1965	6043	2771	61.778	68.561	6.78352	1.72639e-15	-5.12548e-15	-3.91086	1	1
Solyc00g008570	SL3.0ch00	7584122	7586122	-	643953	348083	439127	173450	64.912	71.685	6.77293	0	0.733883	4.32545	0.197973	0.79887
Solyc00g008580	SL3.0ch00	7582182	7584182	+	348063	306037	173455	135084	53.213	56.218	3.00567	4.7874e-166	0.871767	5.85972	0.173186	0.748401
Solyc00g008910	SL3.0ch00	7693875	7695875	+	4042	2351	9125	4996	63.225	64.62	1.39467	0.0289915	-5.12548e-15	-3.91086	1	1
Solyc00g009020	SL3.0ch00	7793998	7795998	+	3984	5515	4004	5008	41.941	44.43	2.48839	0.000496698	0.411953	7.62401	0.108978	0.588988
Solyc00g009030	SL3.0ch00	7802222	7804222	-	4203	6744	4354	6341	38.394	40.711	2.31653	0.000402208	-1.23725	-2.21618	0.594036	1
Solyc00g009040	SL3.0ch00	7811311	7813311	+	10974	10966	13228	12793	50.018	50.836	0.817632	0.0384039	-5.12548e-15	-2.81329	1	1
Solyc00g009100	SL3.0ch00	7854022	7856022	-	5962	4165	6699	4401	58.872	60.351	1.47903	0.0162446	0.407641	4.21373	0.193833	0.790266
Solyc00g009120	SL3.0ch00	7879497	7881497	+	266	1731	237	1294	13.32	15.48	2.1601	0.03701	1.33404	2.57936	0.0306116	0.276494
Solyc00g009140	SL3.0ch00	7885380	7887380	+	1123	3258	1342	2734	25.633	32.924	7.29102	5.38381e-13	-0.0992773	3.36058	0.823749	1
Solyc00g009141	SL3.0ch00	7897016	7899016	-	10019	6618	12297	6035	60.221	67.079	6.85823	3.27881e-39	0.481765	4.45932	0.105164	0.577892
Solyc00g009142	SL3.0ch00	8038913	8040913	+	3685	2255	9238	4277	62.037	68.354	6.31664	5.69281e-17	-5.12548e-15	-3.91086	1	1
Solyc00g009143	SL3.0ch00	8048016	8050016	+	5422	3615	7868	4198	59.998	65.208	5.21024	3.3125e-14	-5.12548e-15	-3.91086	1	1
Solyc00g009144	SL3.0ch00	8087349	8089349	+	555	423	509	304	56.748	62.608	5.85916	0.00733616	-5.12548e-15	-3.91086	1	1
Solyc00g009540	SL3.0ch00	8210678	8212678	-	2121	4370	2036	3727	32.676	35.329	2.65281	0.00147653	-5.12548e-15	-3.91086	1	1
Solyc00g009148	SL3.0ch00	8298357	8300357	+	4182	2876	5407	3244	59.252	62.501	3.24953	3.29418e-05	-5.12548e-15	-3.91086	1	1
Solyc00g009760	SL3.0ch00	8404083	8406083	+	15059	14660	7944	6692	50.671	54.277	3.60584	2.39993e-12	1.01607	4.48675	0.0850934	0.513266
Solyc00g009765	SL3.0ch00	8624891	8626891	+	1697	1341	3244	2217	55.859	59.403	3.54392	0.0011216	-5.12548e-15	-3.91086	1	1
Solyc06g024330	SL3.0ch00	8833977	8835977	+	6027	4553	8263	4930	56.966	62.632	5.66573	4.18923e-18	-5.12548e-15	-3.91086	1	1
Solyc00g010520	SL3.0ch00	8837560	8839560	-	3583	2765	4476	2752	56.443	61.926	5.48287	1.94673e-10	-5.12548e-15	-3.91086	1	1
Solyc00g010530	SL3.0ch00	8854847	8856847	-	71336	55380	46433	30872	56.296	60.065	3.76871	2.80414e-61	0.733784	-2.83969	0.570789	1
Solyc00g010750	SL3.0ch00	8954513	8956513	-	1854	4114	2075	4160	31.066	33.28	2.21419	0.00556994	-6.49581	-2.19298	0.000377759	0.0112316
Solyc00g010760	SL3.0ch00	8955572	8957572	-	2098	4257	2302	4326	33.013	34.731	1.71807	0.0215346	-5.12548e-15	-3.91086	1	1
Solyc00g010755	SL3.0ch00	8974152	8976152	-	2950	6105	3181	5896	32.579	35.045	2.46593	0.000369116	-5.54153	-2.03165	0.00568058	0.0858399
Solyc00g010780	SL3.0ch00	8974782	8976782	-	2154	4340	2456	4628	33.169	34.67	1.5006	0.0345145	-5.12548e-15	-3.91086	1	1
Solyc00g010930	SL3.0ch00	9019959	9021959	+	5182	3384	8813	4339	60.495	67.009	6.51384	1.03912e-21	-5.12548e-15	-3.91086	1	1
Solyc00g011150	SL3.0ch00	9131088	9133088	-	202386	223467	81633	79593	47.525	50.633	3.1078	1.76783e-98	0.989655	4.0957	0.0856921	0.515132
Solyc00g011160	SL3.0ch00	9129189	9131189	+	469259	114484	280546	52798	80.388	84.161	3.77316	0	0.727152	5.13575	0.215667	0.830473
Solyc00g011170	SL3.0ch00	9132267	9134267	-	2446	4614	1355	2306	34.646	37.012	2.36585	0.00957193	1.13669	-2.15704	0.571687	1
Solyc00g011175	SL3.0ch00	9159658	9161658	+	1542	1018	2278	990	60.234	69.706	9.47187	1.52381e-13	-5.12548e-15	-3.91086	1	1
Solyc03g043580	SL3.0ch00	9309777	9311777	+	432	1428	593	1554	23.226	27.62	4.39413	0.00114403	-5.12548e-15	-3.91086	1	1
Solyc00g011673	SL3.0ch00	9365433	9367433	+	1758	1388	2030	1169	55.88	63.457	7.57685	1.51695e-09	-5.12548e-15	-3.91086	1	1
Solyc00g011870	SL3.0ch00	9381599	9383599	-	2986	7091	3257	7281	29.632	30.907	1.27536	0.0251652	-5.12548e-15	-3.91086	1	1
Solyc00g011890	SL3.0ch00	9403098	9405098	-	4890	9224	6478	11659	34.646	35.717	1.07059	0.0252057	0.120157	7.3653	0.71525	1
Solyc00g011895	SL3.0ch00	9476079	9478079	+	4215	2946	5340	3487	58.86	60.496	1.63571	0.0200377	-5.12548e-15	-3.91086	1	1
Solyc00g012430	SL3.0ch00	9551103	9553103	+	159090	142478	82078	63857	52.754	56.243	3.48858	4.97671e-105	0.460257	0.150227	0.655564	1
Solyc00g012440	SL3.0ch00	9563323	9565323	+	4786	4399	3300	2416	52.107	57.733	5.62598	4.86128e-11	0.148489	2.48019	0.823832	1
Solyc00g012700	SL3.0ch00	9627415	9629415	-	2107	1473	4854	2781	58.855	63.576	4.72089	2.08707e-06	-5.12548e-15	-3.91086	1	1
Solyc00g012704	SL3.0ch00	9696804	9698804	-	16070	13352	25600	17869	54.619	58.893	4.27355	3.43472e-29	-2.01628	-3.86689	1	1
Solyc00g012706	SL3.0ch00	9705530	9707530	-	5028	4246	7498	4875	54.216	60.6	6.3836	3.03029e-20	-5.12548e-15	-3.91086	1	1
Solyc00g012708	SL3.0ch00	9708087	9710087	-	9170	6543	11911	7734	58.359	60.631	2.27188	1.60643e-05	-5.12548e-15	-3.91086	1	1
Solyc00g013181	SL3.0ch00	9755341	9757341	-	402	1078	630	1485	27.162	29.787	2.62507	0.0458639	1.82392	-3.79784	1	1
Solyc00g013184	SL3.0ch00	9893538	9895538	+	1100	698	2091	1088	61.179	65.775	4.59631	0.000912973	-5.12548e-15	-3.91086	1	1
Solyc00g013185	SL3.0ch00	9897786	9899786	+	4259	3430	7578	4706	55.391	61.69	6.29919	6.84515e-18	-5.12548e-15	-3.91086	1	1
Solyc00g013186	SL3.0ch00	9906680	9908680	+	3079	2123	5903	3508	59.189	62.724	3.5357	2.74566e-05	-5.12548e-15	-3.91086	1	1
Solyc00g013188	SL3.0ch00	9963268	9965268	+	2254	2249	2596	2288	50.056	53.153	3.09763	0.00188908	-5.12548e-15	-3.91086	1	1
Solyc00g014170	SL3.0ch00	9966728	9968728	+	3733	5757	4362	5567	39.336	43.932	4.59577	1.79201e-10	-5.12548e-15	-3.91086	1	1
Solyc00g014180	SL3.0ch00	9969604	9971604	+	4265	3697	4603	3356	53.567	57.834	4.26696	9.26298e-08	-5.12548e-15	-3.91086	1	1
Solyc00g014190	SL3.0ch00	9985583	9987583	+	1285	2269	2145	2435	36.156	46.834	10.6776	2.45843e-21	-5.12548e-15	-3.91086	1	1
Solyc00g014290	SL3.0ch00	10010691	10012691	-	3177	2855	3257	2714	52.669	54.547	1.87788	0.0219441	-5.12548e-15	-3.91086	1	1
Solyc00g014395	SL3.0ch00	10046778	10048778	+	7501	5303	9297	5076	58.583	64.684	6.10053	4.47641e-24	-5.12548e-15	-3.91086	1	1
Solyc00g015000	SL3.0ch00	10152463	10154463	-	692	2722	547	1785	20.269	23.456	3.18678	0.0027177	-5.12548e-15	-3.91086	1	1
Solyc00g015600	SL3.0ch00	10265463	10267463	-	2180	2965	3202	4052	42.371	44.141	1.76993	0.0271848	1.80453	-3.79351	1	1
Solyc00g015735	SL3.0ch00	10338021	10340021	+	1242	4026	1569	4465	23.576	26.003	2.42634	0.00206984	-5.12548e-15	-3.91086	1	1
Solyc00g015737	SL3.0ch00	10361092	10363092	-	6646	4520	12053	7123	59.52	62.855	3.33464	1.44117e-08	-5.12548e-15	-3.91086	1	1
Solyc00g016790	SL3.0ch00	10444493	10446493	+	8361	6110	15017	7745	57.778	65.974	8.19637	1.82803e-55	-5.12548e-15	-3.91086	1	1
Solyc00g017235	SL3.0ch00	10541075	10543075	+	921	616	1312	735	59.922	64.094	4.17187	0.00678024	-5.12548e-15	-3.91086	1	1
Solyc00g017540	SL3.0ch00	10558570	10560570	+	683	2340	594	1644	22.593	26.542	3.9481	0.000763742	-5.12548e-15	-3.91086	1	1
Solyc00g017550	SL3.0ch00	10562435	10564435	+	2352	3850	3290	4313	37.923	43.272	5.34914	4.30335e-10	-5.12548e-15	-3.91086	1	1
Solyc00g017760	SL3.0ch00	10585381	10587381	-	14464	14523	17217	14383	49.898	54.484	4.58595	1.69155e-28	-5.12548e-15	-3.91086	1	1
Solyc00g017860	SL3.0ch00	10592794	10594794	+	6587	6757	7056	6263	49.363	52.977	3.61394	6.56141e-09	-5.12548e-15	-3.91086	1	1
Solyc00g017933	SL3.0ch00	10619380	10621380	+	874	539	2168	1155	61.854	65.242	3.38804	0.0150098	-5.12548e-15	-3.91086	1	1
Solyc00g017937	SL3.0ch00	10634988	10636988	+	5361	4554	4879	3593	54.07	57.59	3.52012	2.09142e-06	-5.12548e-15	-3.91086	1	1
Solyc00g018770	SL3.0ch00	10718418	10720418	-	2974	3416	3040	2847	46.541	51.639	5.09773	2.72241e-08	-5.12548e-15	-3.91086	1	1
Solyc00g018970	SL3.0ch00	10735340	10737340	+	4273	4278	6845	5603	49.971	54.989	5.01799	2.33711e-12	1.93729	-3.83197	1	1
Solyc00g019610	SL3.0ch00	10805934	10807934	+	705	1860	288	522	27.485	35.556	8.07018	1.48211e-05	-5.12548e-15	-3.91086	1	1
Solyc00g020540	SL3.0ch00	10903182	10905182	+	4079	10098	5415	11300	28.772	32.396	3.6241	1.44907e-11	-5.12548e-15	-3.91086	1	1
Solyc00g020545	SL3.0ch00	10945268	10947268	+	33611	77144	14483	31773	30.347	31.311	0.96337	0.000140151	-2.08073	-3.0763	0.314223	0.989533
Solyc00g020940	SL3.0ch00	10946755	10948755	+	42363	80797	22102	40237	34.397	35.455	1.05781	6.86932e-06	-5.12548e-15	-3.91086	1	1
Solyc00g022920	SL3.0ch00	11136177	11138177	+	1644	1208	2003	1149	57.644	63.547	5.9032	3.65085e-06	-5.12548e-15	-3.91086	1	1
Solyc00g024040	SL3.0ch00	11224494	11226494	-	5608	2272	6973	2609	71.168	72.772	1.60435	0.0112951	-5.12548e-15	-3.91086	1	1
Solyc00g024150	SL3.0ch00	11224558	11226558	+	5632	2705	6987	3170	67.554	68.79	1.23572	0.037297	0.547734	5.42107	0.100435	0.56314
Solyc00g024160	SL3.0ch00	11230391	11232391	-	3104	15891	3300	15731	16.341	17.34	0.998987	0.0059651	3.21455	-3.38126	0.448517	1
Solyc00g024570	SL3.0ch00	11259566	11261566	+	14746	35092	18927	38970	29.588	32.691	3.10295	5.79036e-27	-5.12548e-15	-3.75958	1	1
Solyc00g026160	SL3.0ch00	11372264	11374264	+	17479	18481	16305	12332	48.607	56.937	8.33004	9.53144e-97	-0.761213	-2.69198	0.846568	1
Solyc00g026905	SL3.0ch00	11436456	11438456	-	4476	5500	6180	6316	44.868	49.456	4.58814	1.85362e-11	-5.12548e-15	-3.91086	1	1
Solyc00g027640	SL3.0ch00	11467152	11469152	+	5818	7760	6836	8057	42.849	45.901	3.05203	3.17523e-07	-5.12548e-15	-3.91086	1	1
Solyc00g027770	SL3.0ch00	11475330	11477330	+	4360	3375	4334	2713	56.367	61.501	5.13419	5.12535e-10	-0.340822	6.00804	0.206718	0.814109
Solyc00g027970	SL3.0ch00	11488487	11490487	+	1617	4379	2317	5002	26.968	31.657	4.68935	6.30875e-09	-5.12548e-15	-3.91086	1	1
Solyc00g028420	SL3.0ch00	11523328	11525328	-	582	1405	856	1728	29.29	33.127	3.83655	0.00373037	-5.12548e-15	-3.91086	1	1
Solyc00g028550	SL3.0ch00	11530930	11532930	-	795	3462	1290	4085	18.675	24	5.32488	5.69007e-10	-5.12548e-15	-3.91086	1	1
Solyc00g028560	SL3.0ch00	11532006	11534006	-	3168	7690	4194	8553	29.177	32.902	3.72522	1.38739e-09	-5.12548e-15	-3.91086	1	1
Solyc00g028760	SL3.0ch00	11537778	11539778	+	7913	12865	8510	13341	38.084	38.946	0.862036	0.0352349	-5.12548e-15	-3.91086	1	1
Solyc00g029500	SL3.0ch00	11590266	11592266	-	2887	5465	3184	5295	34.567	37.552	2.98503	5.21148e-05	-5.12548e-15	-3.91086	1	1
Solyc00g030215	SL3.0ch00	11647547	11649547	-	1475	3281	1760	3475	31.013	33.62	2.60641	0.00374355	-5.12548e-15	-3.76187	1	1
Solyc00g030510	SL3.0ch00	11649548	11651548	+	1357	6963	1905	7691	16.31	19.852	3.54193	1.59955e-09	-5.12548e-15	-3.91086	1	1
Solyc00g030520	SL3.0ch00	11657277	11659277	-	1919	5860	2499	6659	24.669	27.288	2.61864	9.91039e-05	0.152047	3.52117	0.700921	1
Solyc00g030820	SL3.0ch00	11677156	11679156	-	3461	7266	5649	10206	32.264	35.629	3.36476	2.20288e-08	1.89692	-2.52453	0.15496	0.708958
Solyc00g031050	SL3.0ch00	11688656	11690656	-	1763	1555	1646	1174	53.134	58.369	5.23438	3.9727e-05	-5.12548e-15	-3.91086	1	1
Solyc00g031500	SL3.0ch00	11714108	11716108	-	897	873	784	557	50.678	58.464	7.78587	1.82878e-05	-5.12548e-15	-3.91086	1	1
Solyc00g032030	SL3.0ch00	11739712	11741712	-	2719	5491	3240	5341	33.118	37.758	4.63969	6.88768e-10	-5.12548e-15	-3.91086	1	1
Solyc00g032035	SL3.0ch00	11769366	11771366	-	6062	7175	7415	7076	45.796	51.17	5.37382	1.95968e-18	-5.12548e-15	-3.91086	1	1
Solyc00g032940	SL3.0ch00	11793751	11795751	+	3651	4490	4321	4597	44.847	48.453	3.6055	3.01735e-06	-5.12548e-15	-3.91086	1	1
Solyc00g032943	SL3.0ch00	11803226	11805226	+	12490	9568	16410	10480	56.623	61.026	4.40296	4.71116e-22	-5.12548e-15	-3.91086	1	1
Solyc00g032947	SL3.0ch00	11830799	11832799	-	69	136	178	215	33.659	45.293	11.6341	0.00428232	1.80065	-3.57533	1	1
Solyc00g034810	SL3.0ch00	11904459	11906459	-	4281	5356	5369	5922	44.423	47.551	3.12861	6.72204e-06	-5.12548e-15	-3.91086	1	1
Solyc00g036960	SL3.0ch00	12027754	12029754	-	939	2771	1448	3896	25.31	27.096	1.78584	0.0306387	-5.12548e-15	-3.91086	1	1
Solyc00g036962	SL3.0ch00	12097734	12099734	-	4103	3309	5947	4112	55.356	59.121	3.76501	8.48669e-07	-5.12548e-15	-3.91086	1	1
Solyc00g039290	SL3.0ch00	12147085	12149085	+	276	610	812	1336	31.151	37.803	6.65137	0.000428748	-5.12548e-15	-3.91086	1	1
Solyc00g036968	SL3.0ch00	12148869	12150869	+	678	1816	768	1774	27.185	30.212	3.02719	0.0105335	-5.12548e-15	-3.91086	1	1
Solyc00g040290	SL3.0ch00	12203879	12205879	-	1315	2777	1388	2590	32.136	34.892	2.75603	0.00554105	-5.12548e-15	-3.91086	1	1
Solyc00g040390	SL3.0ch00	12201979	12203979	+	1418	2773	1773	2391	33.834	42.579	8.74484	7.72567e-16	-5.12548e-15	-3.91086	1	1
Solyc00g042640	SL3.0ch00	12320155	12322155	+	502	971	2435	3269	34.08	42.689	8.60923	3.33115e-09	1.7995	-3.67051	1	1
Solyc00g042840	SL3.0ch00	12334757	12336757	-	2929	5600	3197	5751	34.342	35.729	1.387	0.0289468	-1.54383	0.778337	0.0723112	0.470687
Solyc00g042854	SL3.0ch00	12376717	12378717	+	5168	7553	5844	7478	40.626	43.867	3.24155	1.78759e-07	-5.12548e-15	-3.91086	1	1
Solyc00g044350	SL3.0ch00	12409306	12411306	+	2224	7676	2734	7986	22.465	25.504	3.03908	4.75556e-07	4.05055	-0.571401	0.11269	0.599422
Solyc00g044750	SL3.0ch00	12436116	12438116	-	1805	9002	1725	7901	16.702	17.92	1.21808	0.0124375	3.95027	-1.60488	0.0118808	0.145977
Solyc00g044755	SL3.0ch00	12523754	12525754	-	3662	5190	5030	6159	41.369	44.955	3.58568	4.95996e-07	-5.12548e-15	-3.91086	1	1
Solyc00g046580	SL3.0ch00	12523754	12525754	-	3662	5190	5030	6159	41.369	44.955	3.58568	4.95996e-07	-5.12548e-15	-3.91086	1	1
Solyc00g047200	SL3.0ch00	12554728	12556728	-	2767	8682	3127	8766	24.168	26.293	2.12473	0.000167675	0.674503	-3.522	0.867775	1
Solyc00g048515	SL3.0ch00	12620943	12622943	+	149	260	523	681	36.43	43.439	7.00822	0.00880308	-5.12548e-15	-3.91086	1	1
Solyc00g052540	SL3.0ch00	12815691	12817691	-	4777	8512	5902	8490	35.947	41.009	5.06187	2.53386e-17	-5.12548e-15	-3.91086	1	1
Solyc00g052545	SL3.0ch00	12827121	12829121	+	146	138	430	181	51.408	70.376	18.968	8.51241e-08	-5.12548e-15	-3.91086	1	1
Solyc00g053440	SL3.0ch00	12855297	12857297	+	342	7015	511	7175	4.649	6.648	1.99982	1.62614e-07	0.684766	6.45675	0.136598	0.66288
Solyc00g053740	SL3.0ch00	12868727	12870727	+	1723	2389	2183	2819	41.902	43.643	1.74079	0.0482044	-5.12548e-15	-3.91086	1	1
Solyc00g056180	SL3.0ch00	12985694	12987694	-	626	2106	752	1978	22.914	27.546	4.63217	7.77696e-05	-5.12548e-15	-3.91086	1	1
Solyc00g057880	SL3.0ch00	13059178	13061178	+	4733	8593	8013	11092	35.517	41.942	6.42487	2.1124e-30	0.352165	2.53643	0.479249	1
Solyc00g059100	SL3.0ch00	13120903	13122903	-	706	2357	924	2442	23.049	27.451	4.40168	4.846e-05	-0.474225	3.04949	0.200601	0.803394
Solyc00g059505	SL3.0ch00	13155840	13157840	-	915	3773	1105	4066	19.518	21.369	1.85126	0.0132199	-5.12548e-15	-3.91086	1	1
Solyc07g021600	SL3.0ch00	13287270	13289270	+	4158	4490	4729	4583	48.08	50.784	2.70345	0.000247711	-5.12548e-15	-3.91086	1	1
Solyc00g065510	SL3.0ch00	13406910	13408910	+	2043	2236	2662	2314	47.745	53.497	5.75198	5.54532e-08	-5.12548e-15	-3.91086	1	1
Solyc00g065940	SL3.0ch00	13426175	13428175	-	159	290	433	478	35.412	47.53	12.1182	2.16971e-05	-5.12548e-15	-3.91086	1	1
Solyc00g068970	SL3.0ch00	13555018	13557018	-	11826	14415	5080	5590	45.067	47.61	2.54324	9.73586e-06	0.451403	4.99672	0.439838	1
Solyc00g068980	SL3.0ch00	13553285	13555285	+	193709	139792	114034	64460	58.083	63.887	5.80326	0	0.857065	2.42878	0.229631	0.854945
Solyc01g058600	SL3.0ch00	13582322	13584322	+	1744	3126	2103	3364	35.811	38.467	2.65608	0.00363543	-5.12548e-15	-3.91086	1	1
Solyc00g069887	SL3.0ch00	13629190	13631190	+	6066	6780	9551	8706	47.221	52.314	5.09326	4.37701e-18	-5.12548e-15	-3.91086	1	1
Solyc00g072100	SL3.0ch00	13690746	13692746	-	9544	16419	12221	19251	36.76	38.831	2.07134	4.74956e-07	0.0589074	4.73822	0.862782	1
Solyc00g072405	SL3.0ch00	13709986	13711986	+	1142	913	2223	1335	55.572	62.479	6.90714	5.40559e-07	-5.12548e-15	-3.91086	1	1
Solyc00g073900	SL3.0ch00	13761621	13763621	+	2135	10588	2875	13137	16.781	17.955	1.17465	0.00583678	-5.12548e-15	-3.91086	1	1
Solyc00g074210	SL3.0ch00	13775616	13777616	+	4037	7689	5230	9350	34.428	35.871	1.44329	0.00905649	-5.12548e-15	-3.91086	1	1
Solyc00g075035	SL3.0ch00	13829621	13831621	-	2133	5411	2540	6001	28.274	29.739	1.46478	0.0226105	-5.12548e-15	-3.91086	1	1
Solyc06g050455	SL3.0ch00	14042395	14044395	-	5236	3711	9103	5697	58.522	61.507	2.98435	6.05545e-06	-5.12548e-15	-3.91086	1	1
Solyc00g084650	SL3.0ch00	14212157	14214157	-	1246	2351	1759	2597	34.64	40.381	5.74111	2.09051e-07	-2.12874	-1.40439	0.074615	0.479267
Solyc00g084750	SL3.0ch00	14210498	14212498	-	6243	10420	7664	11101	37.466	40.842	3.37575	1.76403e-10	-5.12548e-15	-3.91086	1	1
Solyc00g084760	SL3.0ch00	14211628	14213628	-	2713	4927	3308	5050	35.51	39.579	4.06838	1.68934e-07	0.268579	-2.89452	1	1
Solyc00g084870	SL3.0ch00	14214156	14216156	+	5	223	38	111	2.193	25.503	23.3104	6.61466e-12	-5.12548e-15	-3.91086	1	1
Solyc06g024210	SL3.0ch00	14392228	14394228	-	2873	3020	3545	3126	48.753	53.14	4.3877	1.19153e-06	0.428674	5.08388	0.471987	1
Solyc00g090110	SL3.0ch00	14416922	14418922	+	1736	1471	749	522	54.132	58.93	4.79839	0.00250961	-5.12548e-15	-3.91086	1	1
Solyc00g090430	SL3.0ch00	14430232	14432232	+	8873	15758	21526	25888	36.024	45.4	9.37638	3.74093e-128	1.85308	-3.76012	1	1
Solyc00g090650	SL3.0ch00	14441347	14443347	-	1840	1893	2530	2094	49.29	54.715	5.42442	1.01413e-06	-5.12548e-15	-3.91086	1	1
Solyc00g090660	SL3.0ch00	14441661	14443661	-	1919	1949	2649	2171	49.612	54.959	5.3463	9.35452e-07	-5.12548e-15	-3.91086	1	1
Solyc00g090860	SL3.0ch00	14446495	14448495	-	2929	5763	2754	4933	33.698	35.827	2.12907	0.00295364	-5.12548e-15	-3.91086	1	1
Solyc00g091170	SL3.0ch00	14456134	14458134	+	3146	3757	3824	4309	45.574	47.018	1.44393	0.0401137	0.0696224	3.0487	0.876915	1
Solyc00g092870	SL3.0ch00	14521606	14523606	+	12647	8264	24614	12000	60.48	67.226	6.74552	9.90248e-58	-5.12548e-15	-3.91086	1	1
Solyc00g094020	SL3.0ch00	14571243	14573243	-	3392	5221	3388	4856	39.382	41.097	1.71423	0.0135546	-5.12548e-15	-3.91086	1	1
Solyc00g095465	SL3.0ch00	14631843	14633843	+	494	396	564	365	55.506	60.71	5.20482	0.0145024	-5.12548e-15	-3.91086	1	1
Solyc00g095860	SL3.0ch00	14638287	14640287	-	276	691	552	936	28.542	37.097	8.55489	1.28127e-05	-5.12548e-15	-3.87203	1	1
Solyc00g097260	SL3.0ch00	14687968	14689968	+	4629	11224	5556	12201	29.2	31.289	2.08955	3.08372e-05	4.04214	-3.67847	0.286977	0.951181
Solyc00g099160	SL3.0ch00	14760965	14762965	-	488	4894	576	4988	9.067	10.352	1.285	0.013665	-5.12548e-15	-3.91086	1	1
Solyc00g099580	SL3.0ch00	14780831	14782831	-	4980	8113	5725	8508	38.036	40.223	2.18783	0.00018433	-5.12548e-15	-3.48102	1	1
Solyc00g104200	SL3.0ch00	14939878	14941878	+	1244	1253	649	548	49.82	54.219	4.3991	0.00761741	-5.12548e-15	-3.91086	1	1
Solyc00g104330	SL3.0ch00	14948892	14950892	-	6574	14304	7160	14647	31.488	32.833	1.3458	0.00202262	-5.12548e-15	-3.91086	1	1
Solyc00g104333	SL3.0ch00	14952754	14954754	-	265	335	587	406	44.167	59.114	14.9471	1.34719e-08	-3.82641	-3.36054	0.226889	0.849866
Solyc00g104940	SL3.0ch00	14969207	14971207	-	6762	12372	9260	12951	35.34	41.691	6.35082	1.15582e-38	0.721209	0.894013	0.503201	1
Solyc00g107050	SL3.0ch00	15044886	15046886	-	26536	57998	29012	59537	31.391	32.764	1.37286	1.83546e-09	-5.12548e-15	-3.91086	1	1
Solyc00g109450	SL3.0ch00	15133864	15135864	-	148	674	465	1619	18.005	22.313	4.30799	0.00623134	-5.12548e-15	-3.91086	1	1
Solyc00g110870	SL3.0ch00	15184121	15186121	-	4475	6515	1753	1811	40.719	49.186	8.46747	4.85187e-18	1.68082	-0.077562	0.169697	0.741094
Solyc00g111170	SL3.0ch00	15191789	15193789	+	977	2837	1713	4000	25.616	29.984	4.3681	3.86288e-06	-5.12548e-15	-3.91086	1	1
Solyc00g111770	SL3.0ch00	15211281	15213281	+	4526	7324	5391	7463	38.194	41.94	3.74616	3.52891e-09	-5.12548e-15	-3.91086	1	1
Solyc00g112490	SL3.0ch00	15235729	15237729	+	7177	13874	9155	16425	34.093	35.79	1.69629	0.000119639	-5.12548e-15	-3.91086	1	1
Solyc00g112505	SL3.0ch00	15242310	15244310	-	19858	32200	24463	34531	38.146	41.467	3.32101	1.811e-28	-5.12548e-15	-3.91086	1	1
Solyc00g112600	SL3.0ch00	15244053	15246053	-	5716	6957	6632	6701	45.104	49.741	4.63748	2.25464e-13	-5.12548e-15	-3.91086	1	1
Solyc00g112700	SL3.0ch00	15242886	15244886	+	21524	31787	25891	34109	40.374	43.152	2.77726	1.81984e-20	-5.12548e-15	-3.91086	1	1
Solyc00g112930	SL3.0ch00	15254586	15256586	-	14482	22129	15232	22605	39.556	40.257	0.700474	0.0273393	-0.45554	1.28323	0.623296	1
Solyc00g113750	SL3.0ch00	15283610	15285610	-	628	747	2031	2179	45.673	48.242	2.56955	0.0492006	-5.12548e-15	-3.91086	1	1
Solyc00g117657	SL3.0ch00	15476194	15478194	+	1654	1393	1774	803	54.283	68.84	14.5568	5.07706e-28	-5.12548e-15	-3.91086	1	1
Solyc00g120820	SL3.0ch00	15507960	15509960	+	2498	2322	2968	2321	51.826	56.116	4.29074	1.62808e-05	-5.12548e-15	-3.91086	1	1
Solyc00g123030	SL3.0ch00	15583143	15585143	+	1780	7573	2395	9510	19.031	20.118	1.08627	0.0262946	-5.12548e-15	-3.91086	1	1
Solyc00g123240	SL3.0ch00	15592269	15594269	+	1013	1983	1172	2037	33.812	36.522	2.71053	0.014518	-5.12548e-15	-3.91086	1	1
Solyc00g125260	SL3.0ch00	15657623	15659623	+	406	525	858	854	43.609	50.117	6.5078	0.00107156	-5.12548e-15	-3.91086	1	1
Solyc00g125275	SL3.0ch00	15678108	15680108	-	536	803	399	513	40.03	43.75	3.72013	0.0412001	-5.12548e-15	-3.86962	1	1
Solyc00g126430	SL3.0ch00	15691542	15693542	+	3491	4879	4500	5623	41.708	44.453	2.74474	0.000155423	-5.12548e-15	-3.91086	1	1
Solyc00g129670	SL3.0ch00	15797766	15799766	+	2664	3315	2204	2430	44.556	47.562	3.00556	0.00154009	-5.12548e-15	-3.91086	1	1
Solyc00g129880	SL3.0ch00	15807077	15809077	+	1690	7101	1916	7306	19.224	20.776	1.5522	0.00597779	-5.12548e-15	-3.91086	1	1
Solyc00g129980	SL3.0ch00	15812774	15814774	-	661	1767	1243	2056	27.224	37.678	10.454	3.3632e-16	-5.12548e-15	-3.91086	1	1
Solyc00g131610	SL3.0ch00	15863687	15865687	-	3374	7450	4214	8547	31.171	33.022	1.85102	0.00175551	-5.12548e-15	-3.91086	1	1
Solyc00g134620	SL3.0ch00	15963948	15965948	-	3646	7362	3372	6468	33.121	34.268	1.14693	0.0408192	-5.12548e-15	-3.5284	1	1
Solyc00g134820	SL3.0ch00	15965396	15967396	+	2896	5418	3003	4994	34.833	37.552	2.71877	0.000258433	-5.12548e-15	-3.91086	1	1
Solyc00g134830	SL3.0ch00	15966197	15968197	+	1016	2436	1233	2600	29.432	32.168	2.7358	0.00727594	-5.12548e-15	-3.87283	1	1
Solyc00g139760	SL3.0ch00	16128726	16130726	-	11740	5315	17685	5985	68.836	74.715	5.87871	1.44172e-37	-5.12548e-15	-3.91086	1	1
Solyc00g140060	SL3.0ch00	16137850	16139850	-	3543	3613	5062	4227	49.511	54.495	4.98366	4.94384e-10	0.0979054	3.74195	0.864138	1
Solyc00g141360	SL3.0ch00	16179624	16181624	-	240	418	2934	3135	36.474	48.344	11.8699	1.02262e-08	-5.12548e-15	-3.91086	1	1
Solyc00g141560	SL3.0ch00	16184920	16186920	-	3642	4603	4207	4949	44.172	45.948	1.77579	0.0110073	-5.12548e-15	-3.91086	1	1
Solyc00g143770	SL3.0ch00	16255415	16257415	-	598	1194	858	1211	33.371	41.469	8.09877	3.28394e-07	0.317933	1.54555	0.63028	1
Solyc00g144470	SL3.0ch00	16272991	16274991	+	5270	5691	7450	6462	48.08	53.551	5.47134	4.88302e-17	-3.29038	-3.76263	0.465121	1
Solyc00g143777	SL3.0ch00	16273654	16275654	+	6848	6663	9467	7414	50.685	56.081	5.39617	4.3098e-20	-5.12548e-15	-3.91086	1	1
Solyc00g147570	SL3.0ch00	16374656	16376656	-	2351	2611	2950	2501	47.38	54.119	6.73842	1.55897e-11	-5.12548e-15	-3.65539	1	1
Solyc00g153680	SL3.0ch00	16562300	16564300	-	4238	8059	5006	8621	34.464	36.736	2.2722	0.000123875	-1.0805	-0.661091	0.307129	0.979702
Solyc00g160780	SL3.0ch00	16772423	16774423	+	2965	2861	2868	2527	50.893	53.16	2.26778	0.0096758	-5.12548e-15	-1.51988	1	1
Solyc00g160785	SL3.0ch00	16794746	16796746	-	1247	1289	2268	1823	49.172	55.439	6.26684	8.78953e-07	-5.12548e-15	-3.91086	1	1
Solyc09g056230	SL3.0ch00	16856029	16858029	+	4619	3606	6619	4384	56.158	60.156	3.99827	4.13854e-08	-5.12548e-15	-3.91086	1	1
Solyc00g164580	SL3.0ch00	16884713	16886713	+	4683	8251	6660	10914	36.207	37.897	1.69	0.00182349	-3.699	-3.69127	0.264196	0.914969
Solyc00g167290	SL3.0ch00	16963803	16965803	+	997	1119	1602	1432	47.117	52.802	5.68438	5.96058e-05	-5.12548e-15	-3.91086	1	1
Solyc00g167800	SL3.0ch00	16979826	16981826	+	2811	5532	3851	6277	33.693	38.023	4.33039	2.01639e-09	-5.12548e-15	-3.91086	1	1
Solyc00g170200	SL3.0ch00	17048326	17050326	+	596	776	1301	1483	43.44	46.731	3.29109	0.0251429	-5.12548e-15	-3.71946	1	1
Solyc00g171710	SL3.0ch00	17092060	17094060	+	4875	8491	5764	8591	36.473	40.153	3.68012	6.31447e-10	-5.12548e-15	-3.91086	1	1
Solyc00g171810	SL3.0ch00	17098009	17100009	-	192	10330	1357	23579	1.825	5.442	3.61718	3.48751e-59	1.21579	1.65316	0.0485789	0.370858
Solyc00g172410	SL3.0ch00	17116659	17118659	-	5765	8299	7780	10038	40.991	43.664	2.67253	1.98575e-06	-5.12548e-15	-3.91086	1	1
Solyc00g174330	SL3.0ch00	17167463	17169463	-	3169	7302	3478	6320	30.265	35.497	5.2325	8.24219e-15	5.48219	2.19195	0.000282067	0.00897597
Solyc00g174340	SL3.0ch00	17168117	17170117	-	244	3261	258	2384	6.961	9.765	2.80385	8.22183e-05	5.26986	9.35151	0.000279924	0.00893956
Solyc00g183050	SL3.0ch00	17411773	17413773	+	836	2175	1177	2726	27.765	30.156	2.39143	0.017122	0.469087	-2.04406	0.799555	1
Solyc00g183055	SL3.0ch00	17425033	17427033	+	1809	1847	2896	2137	49.48	57.54	8.05993	3.00438e-13	-5.12548e-15	-3.91086	1	1
Solyc00g183550	SL3.0ch00	17429702	17431702	-	325	400	143	103	44.828	58.13	13.3025	0.000309173	-5.12548e-15	-3.91086	1	1
Solyc00g183555	SL3.0ch00	17426037	17428037	+	1789	1827	1911	1505	49.475	55.943	6.46807	8.54475e-08	-5.12548e-15	-3.91086	1	1
Solyc00g184357	SL3.0ch00	17469819	17471819	+	689	1291	688	983	34.798	41.173	6.37497	7.33212e-05	-5.12548e-15	-3.91086	1	1
Solyc00g188850	SL3.0ch00	17577134	17579134	-	4578	4642	6751	6214	49.653	52.071	2.41803	0.000319003	-5.12548e-15	-3.91086	1	1
Solyc00g188853	SL3.0ch00	17577252	17579252	-	4601	4413	6879	6006	51.043	53.388	2.34484	0.000504597	-5.12548e-15	-3.91086	1	1
Solyc00g195350	SL3.0ch00	17751071	17753071	+	1054	2658	1261	2848	28.394	30.689	2.29434	0.0154126	-5.12548e-15	-3.91086	1	1
Solyc00g188855	SL3.0ch00	17751239	17753239	+	1300	3876	1553	4195	25.116	27.018	1.90217	0.0140732	-5.12548e-15	-3.91086	1	1
Solyc00g195360	SL3.0ch00	17751902	17753902	+	3151	5841	4018	6583	35.042	37.902	2.85982	3.39238e-05	2.77572	-3.8258	0.670996	1
Solyc00g201160	SL3.0ch00	17912082	17914082	-	1253	5101	1346	4686	19.72	22.314	2.59446	0.000330786	0.113119	2.6089	0.838115	1
Solyc00g201165	SL3.0ch00	17919894	17921894	-	1223	1858	1276	1682	39.695	43.137	3.44235	0.00453507	-5.12548e-15	-3.91086	1	1
Solyc00g202560	SL3.0ch00	17945080	17947080	+	4811	7088	6174	8457	40.432	42.198	1.7661	0.002559	-5.12548e-15	-3.91086	1	1
Solyc00g209460	SL3.0ch00	18132723	18134723	-	3395	4988	4366	5662	40.499	43.538	3.03947	3.20953e-05	-0.781678	-0.319692	0.408309	1
Solyc12g062400	SL3.0ch00	18133196	18135196	+	3615	5800	4501	6022	38.396	42.773	4.3768	6.7183e-10	-5.12548e-15	-3.91086	1	1
Solyc00g212265	SL3.0ch00	18208150	18210150	+	2691	4916	3360	4653	35.375	41.932	6.55655	1.88201e-16	-5.12548e-15	-3.91086	1	1
Solyc00g217560	SL3.0ch00	18339728	18341728	+	1378	4592	3009	8594	23.082	25.933	2.85087	3.34473e-05	-5.12548e-15	-3.91086	1	1
Solyc00g217960	SL3.0ch00	18350138	18352138	+	1445	2408	1569	2107	37.503	42.682	5.17902	5.54589e-06	1.05859	4.61513	0.00622285	0.0912956
Solyc00g218560	SL3.0ch00	18367559	18369559	-	21291	22990	30843	32148	48.082	48.964	0.882568	0.00298655	-2.87066	-3.82402	0.664799	1
Solyc00g222060	SL3.0ch00	18456008	18458008	+	6526	6053	8123	6105	51.88	57.092	5.21153	5.61643e-17	-5.12548e-15	-3.91086	1	1
Solyc00g222063	SL3.0ch00	18461232	18463232	+	3956	5144	5265	6294	43.473	45.549	2.0764	0.00202294	-5.12548e-15	-3.91086	1	1
Solyc00g222067	SL3.0ch00	18574305	18576305	-	62	384	5712	11423	13.901	33.335	19.4339	1.3773e-19	-5.12548e-15	-3.91086	1	1
Solyc00g230060	SL3.0ch00	18657729	18659729	+	1312	2738	2535	4886	32.395	34.16	1.76476	0.0298825	-5.12548e-15	-3.59771	1	1
Solyc00g231780	SL3.0ch00	18703657	18705657	-	3796	2663	4087	2607	58.771	61.055	2.28397	0.00482118	-0.645132	-1.6855	0.563662	1
Solyc00g233480	SL3.0ch00	18745469	18747469	-	2961	8122	2963	7157	26.717	29.279	2.56206	3.39432e-05	6.35714	-0.735922	0.00513296	0.0799982
Solyc00g244305	SL3.0ch00	19020415	19022415	+	2649	4032	3071	3911	39.65	43.985	4.33478	3.80285e-07	-5.12548e-15	-3.91086	1	1
Solyc00g245200	SL3.0ch00	19032539	19034539	+	6782	11656	10807	14964	36.783	41.935	5.152	9.072e-27	-5.12548e-15	-3.91086	1	1
Solyc00g247300	SL3.0ch00	19082288	19084288	+	2815	6868	3099	6736	29.072	31.51	2.43834	0.000187414	6.76847	-1.97597	0.00366746	0.0630055
Solyc00g249200	SL3.0ch00	19132495	19134495	-	2107	1663	2529	1826	55.889	58.071	2.18259	0.0256336	-5.12548e-15	-3.91086	1	1
Solyc00g249205	SL3.0ch00	19132495	19134495	-	2107	1663	2529	1826	55.889	58.071	2.18259	0.0256336	-5.12548e-15	-3.91086	1	1
Solyc00g254910	SL3.0ch00	19269195	19271195	-	1661	1695	1894	1582	49.493	54.488	4.99447	3.67109e-05	-5.12548e-15	-3.91086	1	1
Solyc00g265110	SL3.0ch00	19509794	19511794	-	1720	2274	2168	2341	43.065	48.082	5.01702	4.27023e-06	1.82874	-2.71469	0.273607	0.930972
Solyc00g266110	SL3.0ch00	19532224	19534224	-	2093	4077	941	938	33.922	50.08	16.1576	1.00272e-34	-5.12548e-15	-3.87428	1	1
Solyc00g268310	SL3.0ch00	19584429	19586429	-	5483	7157	7209	8263	43.378	46.594	3.21568	1.05241e-07	-5.12548e-15	-3.91086	1	1
Solyc00g272810	SL3.0ch00	19688234	19690234	-	527	1830	664	1650	22.359	28.695	6.33597	9.85765e-07	1.99638	-1.04024	0.0922139	0.536397
Solyc00g273110	SL3.0ch00	19695510	19697510	-	2339	5495	3195	6172	29.857	34.109	4.25207	4.76401e-09	-1.20235	3.6641	0.00263425	0.0493051
Solyc00g275310	SL3.0ch00	19745967	19747967	-	2010	2212	2658	2423	47.608	52.313	4.70477	7.40213e-06	-5.12548e-15	-3.91086	1	1
Solyc00g280110	SL3.0ch00	19855053	19857053	-	2632	3373	3029	3048	43.83	49.844	6.01353	8.04606e-11	-5.12548e-15	-2.64721	1	1
Solyc03g033920	SL3.0ch00	19875093	19877093	-	293	4904	1051	10727	5.638	8.923	3.28555	2.10792e-13	-5.12548e-15	-3.91086	1	1
Solyc00g282510	SL3.0ch00	19908568	19910568	+	3612	6185	4642	7410	36.868	38.516	1.648	0.00760405	-5.12548e-15	-3.91086	1	1
Solyc00g284510	SL3.0ch00	19955093	19957093	-	2549	1978	2963	2084	56.307	58.708	2.40154	0.0106952	-5.12548e-15	-3.91086	1	1
Solyc00g286010	SL3.0ch00	19985237	19987237	+	2560	2738	2648	2417	48.32	52.28	3.96023	5.22364e-05	-5.12548e-15	-3.91086	1	1
Solyc00g286020	SL3.0ch00	19985686	19987686	+	2182	2265	2270	2097	49.067	51.981	2.91398	0.00411735	-5.12548e-15	-3.91086	1	1
Solyc00g286030	SL3.0ch00	19986777	19988777	+	662	843	818	814	43.987	50.123	6.13584	0.000462032	-5.12548e-15	-3.91086	1	1
Solyc00g294233	SL3.0ch00	20221505	20223505	-	9737	24727	10047	24052	28.253	29.464	1.21154	0.000372645	-5.12548e-15	-3.87283	1	1
Solyc00g300730	SL3.0ch00	20315297	20317297	-	217	528	231	376	29.128	38.056	8.9285	0.000470946	-5.12548e-15	-3.91086	1	1
Solyc00g304035	SL3.0ch00	20425529	20427529	-	2870	3779	2567	2940	43.164	46.613	3.44902	0.000129235	-5.12548e-15	-3.91086	1	1
Solyc00g308930	SL3.0ch00	20493455	20495455	-	4507	7239	5514	8421	38.371	39.569	1.19892	0.0270475	-5.12548e-15	-3.91086	1	1
Solyc00g311230	SL3.0ch00	20540213	20542213	+	1027	1394	1184	1167	42.42	50.362	7.94106	6.06482e-08	-5.12548e-15	-3.91086	1	1
Solyc00g316530	SL3.0ch00	20653674	20655674	+	6821	9915	1246	1342	40.756	48.145	7.38883	4.50599e-12	1.16314	-3.05152	0.628531	1
Solyc00g318130	SL3.0ch00	20685614	20687614	+	1692	1895	1593	1471	47.17	51.991	4.82052	8.23908e-05	-5.12548e-15	-3.87171	1	1
Solyc00g322630	SL3.0ch00	20783970	20785970	+	2986	7240	3156	6908	29.2	31.359	2.15922	0.000624406	-5.12548e-15	-3.91086	1	1
Solyc00g322635	SL3.0ch00	20793648	20795648	+	4547	3140	7465	4472	59.152	62.537	3.38484	2.49817e-06	-5.12548e-15	-3.87151	1	1
Solyc01g005010	SL3.0ch01	21061	23061	+	5074	10806	6325	12270	31.952	34.015	2.06238	4.72617e-05	-1.25587	1.58303	0.133493	0.653811
Solyc01g005020	SL3.0ch01	44130	46130	-	72	2058	142	2192	3.38	6.084	2.70369	2.32626e-05	-0.230804	5.93903	0.393502	1
Solyc01g005030	SL3.0ch01	44061	46061	+	81	2132	162	2298	3.66	6.585	2.92518	7.03383e-06	0.204124	6.72949	0.536972	1
Solyc01g005080	SL3.0ch01	73169	75169	-	556	5960	771	6544	8.533	10.54	2.00714	5.9846e-05	-0.0265938	3.48798	0.961449	1
Solyc01g005190	SL3.0ch01	149494	151494	+	1	233	41	703	0.427	5.511	5.0834	0.000136575	-0.253803	-1.30319	0.867541	1
Solyc01g005210	SL3.0ch01	163331	165331	+	775	7514	1023	8010	9.35	11.325	1.9754	2.21487e-05	-0.375257	6.30086	0.347234	1
Solyc01g005250	SL3.0ch01	195082	197082	-	1296	3494	2092	3601	27.056	36.747	9.69051	2.67172e-25	0.0906611	5.69157	0.748285	1
Solyc01g005290	SL3.0ch01	209394	211394	-	800	4044	921	4204	16.515	17.971	1.45546	0.0295486	-0.161333	3.2152	0.789901	1
Solyc01g005300	SL3.0ch01	214876	216876	+	2972	6281	3700	7115	32.119	34.212	2.09243	0.00126985	0.329854	6.0498	0.279901	0.940493
Solyc01g005320	SL3.0ch01	228608	230608	-	774	6096	1034	7257	11.266	12.471	1.20498	0.0134522	1.97223	-3.12998	0.373604	1
Solyc01g005330	SL3.0ch01	237029	239029	-	4881	8360	5290	8176	36.863	39.284	2.42135	4.43703e-05	0.186435	5.71054	0.496199	1
Solyc01g005340	SL3.0ch01	245710	247710	-	2680	10587	3042	10433	20.2	22.575	2.37464	2.66806e-06	-0.510887	5.00912	0.129044	0.643015
Solyc01g005370	SL3.0ch01	257883	259883	+	1881	6236	1530	4497	23.174	25.386	2.21218	0.00175553	0.630094	4.67631	0.0646672	0.441089
Solyc01g005430	SL3.0ch01	296679	298679	+	85	3424	132	3750	2.422	3.4	0.977967	0.00786953	0.914155	4.51549	0.0301519	0.274072
Solyc01g005470	SL3.0ch01	324960	326960	-	964	10390	1091	10681	8.49	9.268	0.777354	0.0215879	5.02526	2.29653	0.000136486	0.00506942
Solyc01g005540	SL3.0ch01	370504	372504	-	4761	6477	6340	6988	42.365	47.569	5.20384	1.28773e-15	0.0611218	3.68431	0.857844	1
Solyc01g005550	SL3.0ch01	380342	382342	+	7649	9479	9292	10231	44.658	47.595	2.93727	2.88641e-08	0.292779	5.38073	0.343561	1
Solyc01g005570	SL3.0ch01	403017	405017	-	611	2352	772	2665	20.621	22.461	1.84046	0.0393184	-0.053053	4.56945	0.859856	1
Solyc01g005590	SL3.0ch01	414886	416886	+	5886	10569	6751	10881	35.77	38.288	2.51806	1.8875e-06	2.02685	3.87187	0.0184288	0.198363
Solyc01g005610	SL3.0ch01	425654	427654	+	2707	8511	3356	9451	24.131	26.204	2.07356	0.000187559	0.865027	-3.34553	0.839527	1
Solyc01g005620	SL3.0ch01	435080	437080	-	4393	8758	5683	9080	33.404	38.495	5.09058	4.58981e-18	0.10593	8.05028	0.692824	1
Solyc01g005630	SL3.0ch01	442810	444810	+	7407	10759	8467	11836	40.774	41.703	0.929223	0.0335506	-5.12548e-15	-3.91086	1	1
Solyc01g005670	SL3.0ch01	464434	466434	+	2225	4854	3176	5857	31.431	35.16	3.72898	8.22038e-07	-0.468897	2.15066	0.307246	0.979899
Solyc01g005690	SL3.0ch01	480426	482426	-	65	685	283	1274	8.667	18.176	9.50931	1.1706e-09	-0.0302648	5.53446	0.920176	1
Solyc01g005705	SL3.0ch01	493420	495420	-	993	3070	904	1794	24.44	33.506	9.06623	2.36929e-15	3.14105	-3.79024	0.383863	1
Solyc01g005710	SL3.0ch01	484501	486501	+	1291	3941	1121	2729	24.675	29.117	4.44181	2.84965e-06	-2.07918	-1.6244	0.183159	0.770352
Solyc01g005740	SL3.0ch01	494469	496469	-	1822	4902	1599	2705	27.097	37.151	10.0545	1.72188e-27	-5.12548e-15	-3.91086	1	1
Solyc01g005750	SL3.0ch01	493110	495110	+	655	1774	671	1366	26.966	32.941	5.97477	1.46449e-05	3.05837	-3.75846	0.469845	1
Solyc01g005755	SL3.0ch01	494500	496500	+	1822	4829	1598	2618	27.394	37.903	10.5088	3.62288e-29	-5.12548e-15	-3.64192	1	1
Solyc01g005760	SL3.0ch01	494506	496506	+	1822	4829	1598	2618	27.394	37.903	10.5088	3.62288e-29	0.971072	4.73237	0.124083	0.629979
Solyc01g005775	SL3.0ch01	499851	501851	+	176	1915	148	1145	8.417	11.446	3.02922	0.00262349	-0.138644	1.60127	0.810844	1
Solyc01g005825	SL3.0ch01	556798	558798	+	4948	6185	3996	4680	44.444	46.058	1.61365	0.0136646	-5.12548e-15	-3.82867	1	1
Solyc01g005830	SL3.0ch01	562881	564881	+	4868	7926	5527	7823	38.049	41.401	3.35166	5.03614e-08	1.43687	3.57868	0.00223972	0.0436327
Solyc01g005840	SL3.0ch01	569880	571880	+	3457	6718	3972	5849	33.975	40.444	6.46852	1.81984e-20	-0.494932	3.80079	0.201893	0.805412
Solyc01g005880	SL3.0ch01	583370	585370	+	232	973	252	808	19.253	23.774	4.52047	0.00629331	-5.12548e-15	-3.91086	1	1
Solyc01g005900	SL3.0ch01	593877	595877	-	499	4159	689	4806	10.713	12.539	1.82592	0.00290906	0.654096	-3.25021	1	1
Solyc01g005895	SL3.0ch01	591791	593791	-	196	1900	200	847	9.351	19.102	9.75105	1.35683e-13	-5.12548e-15	-3.91086	1	1
Solyc01g005930	SL3.0ch01	604105	606105	+	9721	8590	10355	8417	53.088	55.162	2.07364	5.78641e-05	-0.393251	5.0411	0.185748	0.775334
Solyc01g005940	SL3.0ch01	612494	614494	+	5621	11014	6441	11807	33.79	35.297	1.50682	0.00215905	-3.28219	-3.5614	0.484798	1
Solyc01g005990	SL3.0ch01	655153	657153	-	1675	6091	2097	6014	21.568	25.854	4.2854	4.56782e-10	2.6108	1.02438	0.541685	1
Solyc01g006000	SL3.0ch01	659939	661939	+	10731	9867	10365	8119	52.097	56.076	3.97823	1.1574e-14	-0.879817	4.46659	0.00288645	0.0527825
Solyc01g006010	SL3.0ch01	668647	670647	+	6823	4536	7160	4454	60.067	61.65	1.58283	0.00863846	-0.591359	4.21254	0.140134	0.671653
Solyc01g006020	SL3.0ch01	681793	683793	-	9220	8554	10344	8044	51.874	56.254	4.38056	2.82129e-16	-0.153301	5.27614	0.705082	1
Solyc01g006040	SL3.0ch01	726948	728948	-	4172	9622	4600	10084	30.245	31.327	1.08158	0.0263081	-0.147011	5.02186	0.629121	1
Solyc01g006060	SL3.0ch01	735073	737073	+	1819	7000	1809	5996	20.626	23.177	2.55153	6.57182e-05	-5.12548e-15	-3.51211	1	1
Solyc01g006080	SL3.0ch01	749861	751861	-	2450	9607	3270	10844	20.32	23.168	2.84834	4.3196e-08	-5.12548e-15	-3.3552	1	1
Solyc01g006090	SL3.0ch01	751736	753736	+	4900	6635	6536	8090	42.479	44.688	2.20813	0.000295057	-0.297504	2.58471	0.60927	1
Solyc01g006100	SL3.0ch01	764489	766489	-	4077	4763	4752	4695	46.12	50.302	4.18177	2.66993e-08	1.28802	1.47575	0.23335	0.861011
Solyc01g006110	SL3.0ch01	771927	773927	-	11042	8307	11781	8195	57.068	58.976	1.90822	0.000111451	-0.0107996	6.23848	0.967144	1
Solyc01g006130	SL3.0ch01	783062	785062	+	526	2610	770	2659	16.773	22.456	5.68257	1.23943e-08	0.037669	5.53023	0.914411	1
Solyc01g006140	SL3.0ch01	793463	795463	-	4348	8735	5099	9519	33.234	34.882	1.64769	0.00265826	1.07607	-0.480778	0.222501	0.84314
Solyc01g006160	SL3.0ch01	807962	809962	-	838	5383	1166	5792	13.471	16.758	3.28719	2.09767e-07	0.407443	7.82334	0.192991	0.788453
Solyc01g006200	SL3.0ch01	827575	829575	+	3329	10401	4599	11641	24.246	28.319	4.07279	5.80173e-15	-0.759287	3.11725	0.0585183	0.416203
Solyc01g006210	SL3.0ch01	836543	838543	-	1234	5340	1142	4434	18.771	20.481	1.70972	0.0106184	-0.171262	1.43521	0.812306	1
Solyc01g006220	SL3.0ch01	851308	853308	-	2799	5278	3958	7084	34.654	35.845	1.191	0.0446757	-1.33269	1.81497	0.0111421	0.139688
Solyc01g006230	SL3.0ch01	850613	852613	+	3338	7229	4374	8388	31.589	34.274	2.68472	1.50822e-05	-0.299575	6.32078	0.279902	0.940493
Solyc01g006310	SL3.0ch01	896761	898761	+	680	5209	975	5729	11.547	14.544	2.9966	8.41306e-07	-5.12548e-15	-3.91086	1	1
Solyc01g006340	SL3.0ch01	912902	914902	+	7712	6554	7722	5714	54.059	57.472	3.41386	1.8092e-08	-0.113709	3.00127	0.777078	1
Solyc01g006350	SL3.0ch01	945512	947512	-	330	3783	436	4216	8.023	9.372	1.34897	0.0157254	-0.317329	6.3271	0.220784	0.839596
Solyc01g006370	SL3.0ch01	1005282	1007282	-	1504	8843	2132	9882	14.536	17.746	3.21035	1.81131e-10	-0.718657	6.81609	0.0266931	0.254466
Solyc01g006380	SL3.0ch01	1010478	1012478	+	2603	8024	2727	7393	24.494	26.947	2.45243	5.04501e-05	-5.12548e-15	-2.90952	1	1
Solyc01g006420	SL3.0ch01	1027975	1029975	+	8070	10555	9027	11043	43.329	44.978	1.64872	0.000835213	-5.12548e-15	-3.91086	1	1
Solyc01g006490	SL3.0ch01	1086682	1088682	-	4437	7754	5505	8043	36.396	40.633	4.2376	7.71914e-12	0.130246	4.64758	0.67041	1
Solyc01g006510	SL3.0ch01	1091446	1093446	+	2861	3847	2842	3131	42.651	47.581	4.93021	4.11758e-08	0.169063	6.26423	0.535678	1
Solyc01g006540	SL3.0ch01	1111464	1113464	+	3474	9813	4545	11394	26.146	28.515	2.36911	6.88317e-06	1.0766	7.83987	0.236834	0.86673
Solyc01g006560	SL3.0ch01	1132896	1134896	-	3635	5034	3711	4753	41.931	43.845	1.9135	0.00723426	0.22077	-0.819997	0.823431	1
Solyc01g006570	SL3.0ch01	1145087	1147087	-	2755	3052	3034	3164	47.443	48.951	1.50853	0.0494793	-5.12548e-15	-3.91086	1	1
Solyc01g006580	SL3.0ch01	1185045	1187045	-	3214	8984	4503	10401	26.349	30.213	3.86478	5.59078e-12	4.23814	-3.09303	0.215659	0.830473
Solyc01g006590	SL3.0ch01	1199684	1201684	-	2602	5902	3194	5573	30.597	36.432	5.83471	1.89641e-15	-5.12548e-15	-3.91086	1	1
Solyc01g006610	SL3.0ch01	1212551	1214551	-	3281	9436	4282	10657	25.8	28.663	2.86312	1.47544e-07	-5.12548e-15	-0.452196	1	1
Solyc01g006640	SL3.0ch01	1233321	1235321	+	4379	7816	5216	8753	35.908	37.34	1.43166	0.00990678	1.80909	-3.87049	1	1
Solyc01g006660	SL3.0ch01	1255271	1257271	-	7977	10870	10103	11755	42.325	46.221	3.89602	1.11155e-14	0.767538	-2.81204	0.649293	1
Solyc01g006670	SL3.0ch01	1259615	1261615	-	1	78	96	287	1.266	25.065	23.7995	5.79514e-08	-0.367477	3.1716	0.380571	1
Solyc01g006690	SL3.0ch01	1270429	1272429	-	5736	10366	6799	10498	35.623	39.307	3.68449	9.51591e-12	-0.519577	1.93278	0.332182	1
Solyc01g006700	SL3.0ch01	1285021	1287021	-	1009	2754	996	2206	26.814	31.106	4.29185	7.67582e-05	-0.211028	5.26629	0.434975	1
Solyc01g006730	SL3.0ch01	1332072	1334072	-	1761	4516	2762	6192	28.055	30.847	2.79175	0.000174715	-5.12548e-15	-2.43504	1	1
Solyc01g006735	SL3.0ch01	1332862	1334862	+	1854	4593	2453	4611	28.758	34.725	5.96781	3.13276e-13	-5.12548e-15	-3.83515	1	1
Solyc01g006740	SL3.0ch01	1340485	1342485	-	8586	3714	10764	3673	69.805	74.558	4.75355	2.3734e-17	0.616808	2.94886	0.11546	0.606949
Solyc01g006760	SL3.0ch01	1350019	1352019	-	1268	4289	884	2553	22.818	25.72	2.90204	0.00136426	-5.12548e-15	-3.91086	1	1
Solyc01g006800	SL3.0ch01	1362187	1364187	+	5707	8700	7216	9000	39.613	44.499	4.88657	2.59529e-17	0.015221	6.54677	0.954873	1
Solyc01g006820	SL3.0ch01	1391134	1393134	-	176	2841	199	2421	5.834	7.595	1.76181	0.00541287	1.21461	0.0936743	0.154625	0.708116
Solyc01g006830	SL3.0ch01	1404011	1406011	-	3360	9143	3706	9433	26.874	28.206	1.33255	0.0102774	0.595812	6.00255	0.0329147	0.289848
Solyc01g006860	SL3.0ch01	1427968	1429968	-	3125	9008	3310	8843	25.756	27.236	1.47987	0.00576759	0.0590383	1.38606	0.930167	1
Solyc01g006870	SL3.0ch01	1438520	1440520	-	4178	9373	5238	10743	30.832	32.776	1.94475	0.000289033	0.181031	4.3424	0.545452	1
Solyc01g006940	SL3.0ch01	1509617	1511617	+	1208	1533	1437	1349	44.072	51.579	7.50782	3.81015e-08	0.885728	5.15815	0.00397344	0.0667553
Solyc01g006960	SL3.0ch01	1539151	1541151	-	9303	7137	11410	6515	56.588	63.654	7.06652	1.75144e-39	-0.0525871	5.44206	0.84723	1
Solyc01g006970	SL3.0ch01	1539025	1541025	+	9390	7502	11492	7158	55.588	61.619	6.03086	1.15113e-29	0.0371465	5.18677	0.91133	1
Solyc01g007060	SL3.0ch01	1592423	1594423	+	8733	9175	9146	8980	48.766	50.458	1.69199	0.000995206	0.11517	4.0243	0.70242	1
Solyc01g007100	SL3.0ch01	1657440	1659440	-	5657	4759	6409	3779	54.311	62.907	8.59667	8.29019e-35	-0.233914	3.82582	0.561031	1
Solyc01g007110	SL3.0ch01	1656814	1658814	+	5643	3805	6399	3465	59.727	64.872	5.14534	4.91365e-13	-0.0141364	2.03106	0.987283	1
Solyc01g007120	SL3.0ch01	1667482	1669482	-	3647	8608	3983	8680	29.759	31.454	1.69456	0.00251821	0.334272	2.93801	0.577645	1
Solyc01g007220	SL3.0ch01	1797708	1799708	+	1458	6622	1658	7051	18.045	19.038	0.993223	0.0491215	0.104734	8.61303	0.732753	1
Solyc01g007250	SL3.0ch01	1812614	1814614	-	2705	5684	3238	5616	32.245	36.571	4.32644	4.37097e-09	0.0779596	4.54561	0.799109	1
Solyc01g007265	SL3.0ch01	1835604	1837604	+	2359	9066	3096	10239	20.648	23.217	2.5694	1.43606e-06	-0.0456273	2.53707	0.918112	1
Solyc01g007740	SL3.0ch01	1843784	1845784	-	6367	7522	7335	7768	45.842	48.567	2.72448	3.99617e-06	0.287645	5.05926	0.328156	1
Solyc01g007830	SL3.0ch01	1938784	1940784	-	2465	6969	3342	8323	26.129	28.65	2.52091	4.32271e-05	-0.0617917	-2.44535	1	1
Solyc01g007840	SL3.0ch01	1943272	1945272	-	4928	4983	6654	5561	49.723	54.474	4.75148	5.47335e-12	0.0411197	4.41427	0.901482	1
Solyc01g007850	SL3.0ch01	1944753	1946753	+	8159	7249	10147	8424	52.953	54.639	1.68594	0.00140817	-0.348605	2.93566	0.484831	1
Solyc01g007870	SL3.0ch01	1968452	1970452	-	3039	6782	3879	8133	30.944	32.293	1.34881	0.0188321	0.868264	1.92196	0.56766	1
Solyc01g007880	SL3.0ch01	1991492	1993492	-	6088	8541	7595	8584	41.616	46.944	5.3276	3.36067e-20	0.306009	3.88532	0.406086	1
Solyc01g007940	SL3.0ch01	2064704	2066704	-	7758	6552	11060	7260	54.214	60.371	6.15734	6.87657e-28	-5.12548e-15	-1.44042	1	1
Solyc01g007950	SL3.0ch01	2072713	2074713	-	1476	3339	1154	2211	30.654	34.294	3.64	0.000419981	-5.12548e-15	-3.91086	1	1
Solyc01g008000	SL3.0ch01	2108530	2110530	+	9363	5747	10919	6072	61.966	64.263	2.29785	2.09953e-05	0.178269	9.82419	0.520389	1
Solyc01g008010	SL3.0ch01	2114731	2116731	+	2410	3381	2053	2690	41.616	43.285	1.66854	0.0426702	1.01075	3.31523	0.0054921	0.0841291
Solyc01g008020	SL3.0ch01	2124810	2126810	-	6031	8469	6711	8848	41.593	43.133	1.53949	0.00446232	0.378154	2.68148	0.66392	1
Solyc01g008115	SL3.0ch01	2178244	2180244	-	3647	4740	4608	5414	43.484	45.979	2.49488	0.000562396	-5.12548e-15	-3.91086	1	1
Solyc01g008240	SL3.0ch01	2312454	2314454	-	5933	9114	6342	9301	39.43	40.542	1.11231	0.0254195	-5.12548e-15	-3.87399	1	1
Solyc01g008250	SL3.0ch01	2312454	2314454	-	5933	9114	6342	9301	39.43	40.542	1.11231	0.0254195	-0.085802	1.17188	0.878692	1
Solyc01g008270	SL3.0ch01	2318489	2320489	+	4531	6305	5480	7237	41.814	43.092	1.2776	0.0260169	0.710195	4.81923	0.0240469	0.237122
Solyc01g008290	SL3.0ch01	2329217	2331217	+	3684	6994	4405	7010	34.501	38.59	4.08873	5.88395e-10	-0.117874	3.61434	0.761684	1
Solyc01g008310	SL3.0ch01	2357306	2359306	-	2815	7998	3177	8392	26.033	27.461	1.42784	0.00966357	-0.0441849	6.92754	0.860529	1
Solyc01g008320	SL3.0ch01	2359806	2361806	+	9822	8899	11777	9230	52.465	56.062	3.59712	1.83339e-12	-0.212233	6.13021	0.464056	1
Solyc01g008330	SL3.0ch01	2381098	2383098	+	6444	6791	8181	6702	48.689	54.969	6.27967	6.376e-25	0.597542	5.78318	0.105765	0.579341
Solyc01g008340	SL3.0ch01	2395668	2397668	+	1522	4796	2813	7210	24.09	28.065	3.97555	2.95644e-08	0.258158	4.74233	0.383145	1
Solyc01g008350	SL3.0ch01	2405142	2407142	+	2384	3328	3509	4587	41.737	43.342	1.6057	0.0320541	-2.94551	-0.149113	0.000225598	0.00752021
Solyc01g008370	SL3.0ch01	2417918	2419918	-	9935	6121	13097	7383	61.877	63.95	2.07302	4.40034e-05	-0.0309989	7.74719	0.908582	1
Solyc01g008400	SL3.0ch01	2417400	2419400	+	9900	6183	13029	7147	61.556	64.577	3.02104	5.64475e-09	0.0823437	0.0844616	0.961711	1
Solyc01g008405	SL3.0ch01	2417727	2419727	+	9952	6643	13118	7702	59.97	63.007	3.03685	3.70475e-09	-5.12548e-15	-3.87079	1	1
Solyc01g008410	SL3.0ch01	2430124	2432124	-	9286	7971	11250	9167	53.81	55.101	1.29109	0.00749991	-5.12548e-15	-3.91086	1	1
Solyc01g008420	SL3.0ch01	2437381	2439381	+	4863	11039	6389	12559	30.581	33.719	3.13754	8.91154e-10	-1.79986	2.91831	0.000216457	0.00727654
Solyc01g008430	SL3.0ch01	2451862	2453862	-	3162	5694	7123	10228	35.705	41.052	5.34778	1.85947e-16	-5.12548e-15	-3.91086	1	1
Solyc01g008450	SL3.0ch01	2472937	2474937	-	5281	8875	5413	8462	37.306	39.013	1.70688	0.00224856	-5.12548e-15	-2.62191	1	1
Solyc01g008470	SL3.0ch01	2480815	2482815	+	5339	5793	6490	6525	47.961	49.866	1.90471	0.00221329	-0.0198953	3.45162	0.961836	1
Solyc01g008476	SL3.0ch01	2496059	2498059	+	1147	1411	2986	2878	44.84	50.921	6.08115	4.06324e-07	-5.12548e-15	-3.86883	1	1
Solyc01g008478	SL3.0ch01	2498578	2500578	+	1227	1320	3312	2844	48.174	53.801	5.62685	2.24791e-06	-5.12548e-15	-3.91086	1	1
Solyc01g008480	SL3.0ch01	2500548	2502548	+	7007	5930	11716	8630	54.162	57.584	3.42132	1.75481e-09	-0.436149	3.67507	0.338381	1
Solyc01g008490	SL3.0ch01	2514234	2516234	-	57	1081	71	611	5.009	10.411	5.40177	2.52489e-05	-0.491985	3.65429	0.155537	0.710322
Solyc01g008500	SL3.0ch01	2543420	2545420	+	63	424	39	156	12.936	20	7.06366	0.0135968	-5.12548e-15	-3.91086	1	1
Solyc01g008520	SL3.0ch01	2553044	2555044	+	8069	7570	9437	7740	51.595	54.94	3.34437	2.51515e-09	-0.397248	1.49906	0.46463	1
Solyc01g008530	SL3.0ch01	2571653	2573653	-	4006	5450	4592	5711	42.365	44.57	2.20491	0.00130844	0.583666	1.66212	0.373089	1
Solyc01g008550	SL3.0ch01	2584641	2586641	-	7928	10097	8202	9958	43.983	45.165	1.18184	0.0138684	2.57003	5.03723	0.00042881	0.0124032
Solyc01g008560	SL3.0ch01	2598580	2600580	-	4827	10936	5093	11017	30.622	31.614	0.991561	0.0293905	2.82168	5.44718	8.36488e-08	1.36619e-05
Solyc01g008580	SL3.0ch01	2607960	2609960	-	9338	7641	10634	8265	54.997	56.268	1.27018	0.00933783	-5.12548e-15	-3.91086	1	1
Solyc01g008590	SL3.0ch01	2608664	2610664	+	9347	9524	10464	10169	49.531	50.715	1.18385	0.0110675	-5.12548e-15	-3.91086	1	1
Solyc01g008600	SL3.0ch01	2615089	2617089	+	10038	10603	11848	11666	48.631	50.387	1.75564	0.000201167	-0.657288	4.09473	0.0553343	0.401704
Solyc01g008610	SL3.0ch01	2631211	2633211	-	8971	9527	11562	11088	48.497	51.046	2.54922	3.63692e-07	-5.12548e-15	-3.62675	1	1
Solyc01g008640	SL3.0ch01	2639327	2641327	+	5604	8960	6327	9443	38.478	40.12	1.64204	0.00239795	1.85014	-3.86959	1	1
Solyc01g008650	SL3.0ch01	2648933	2650933	-	4293	9746	5969	11885	30.579	33.432	2.85318	9.26005e-08	-5.12548e-15	-3.91086	1	1
Solyc01g008700	SL3.0ch01	2685791	2687791	-	1512	7975	2583	10478	15.938	19.776	3.83883	3.80373e-13	-0.459925	6.063	0.257354	0.903605
Solyc01g008710	SL3.0ch01	2687380	2689380	+	3055	11643	3433	11778	20.785	22.569	1.78405	0.000161272	0.921332	10.1427	0.275209	0.933455
Solyc01g008720	SL3.0ch01	2692300	2694300	+	6530	7240	7647	7979	47.422	48.938	1.51574	0.00604913	0.647856	2.37756	0.359267	1
Solyc01g008760	SL3.0ch01	2722192	2724192	+	7809	4088	9151	4575	65.638	66.669	1.0307	0.0418167	0.649703	3.24266	0.108169	0.58619
Solyc01g008830	SL3.0ch01	2786576	2788576	+	6599	8480	7937	9294	43.763	46.062	2.29948	3.41365e-05	-0.285217	0.328201	0.725726	1
Solyc01g008840	SL3.0ch01	2796561	2798561	+	7725	8635	8770	9335	47.219	48.44	1.22083	0.0137417	0.610694	6.46595	0.0201086	0.210569
Solyc01g008910	SL3.0ch01	2868028	2870028	+	7677	7875	8726	8578	49.363	50.428	1.06422	0.0287164	-0.737121	3.49617	0.0864928	0.517683
Solyc01g008920	SL3.0ch01	2873873	2875873	+	7746	6882	8758	6047	52.953	59.156	6.20245	7.94847e-26	-0.322049	0.30827	0.749552	1
Solyc01g008925	SL3.0ch01	2875840	2877840	+	1622	3254	1581	2922	33.265	35.11	1.84496	0.0317335	-0.553611	1.82319	0.34501	1
Solyc01g008970	SL3.0ch01	2924248	2926248	-	7959	8939	10245	9765	47.1	51.199	4.09915	1.45501e-14	-0.282072	8.04409	0.290017	0.956421
Solyc01g008973	SL3.0ch01	2925008	2927008	+	10586	9795	13347	11114	51.941	54.564	2.62388	4.57735e-08	-0.299454	-2.17491	0.796818	1
Solyc01g008990	SL3.0ch01	2935512	2937512	+	89	1809	96	1194	4.689	7.442	2.75271	0.00108498	-0.120982	4.25565	0.686282	1
Solyc01g009030	SL3.0ch01	2958105	2960105	+	6909	8335	7876	7636	45.323	50.774	5.45084	6.84398e-21	0.236574	5.17021	0.368825	1
Solyc01g009040	SL3.0ch01	2974050	2976050	+	6406	9572	7540	10227	40.093	42.438	2.3456	1.33955e-05	-0.09954	-0.560492	1	1
Solyc01g009050	SL3.0ch01	2998631	3000631	-	7725	8762	10331	9631	46.855	51.753	4.89823	7.52198e-20	-0.126699	5.57146	0.64226	1
Solyc01g009060	SL3.0ch01	2999584	3001584	+	10234	8029	13787	9141	56.037	60.132	4.09492	2.4005e-16	-0.420408	5.41274	0.101631	0.56684
Solyc01g009100	SL3.0ch01	3044067	3046067	+	9340	9354	10618	9988	49.963	51.529	1.56613	0.00137398	0.710705	7.06217	0.0613956	0.426905
Solyc01g009120	SL3.0ch01	3077562	3079562	-	798	2587	1117	2707	23.575	29.21	5.63566	9.71849e-08	-0.451777	4.0662	0.160883	0.721092
Solyc01g009140	SL3.0ch01	3096447	3098447	+	476	1381	555	1040	25.633	34.796	9.1635	9.55441e-09	-5.12548e-15	-3.79747	1	1
Solyc01g009150	SL3.0ch01	3098610	3100610	+	4545	5745	4708	4968	44.169	48.656	4.48737	4.46418e-10	0.455139	3.52943	0.192091	0.786752
Solyc01g009180	SL3.0ch01	3160891	3162891	+	3153	7562	4386	8586	29.426	33.811	4.38525	1.4419e-12	-0.0430673	5.66637	0.876176	1
Solyc01g009190	SL3.0ch01	3168921	3170921	+	4031	3182	5991	4208	55.885	58.741	2.85585	0.000151037	-5.12548e-15	-3.34744	1	1
Solyc01g009220	SL3.0ch01	3181620	3183620	-	5197	8328	6258	8385	38.425	42.737	4.31201	5.38419e-13	1.20913	-1.7345	0.61162	1
Solyc01g009250	SL3.0ch01	3213221	3215221	-	4514	7699	5995	9311	36.961	39.168	2.20703	0.000160777	-0.178788	0.191455	0.820636	1
Solyc01g009307	SL3.0ch01	3358218	3360218	-	755	980	1318	1345	43.516	49.493	5.9772	9.8783e-05	-5.12548e-15	-3.91086	1	1
Solyc01g009310	SL3.0ch01	3417720	3419720	+	9406	6346	10864	6733	59.713	61.738	2.02474	0.00013851	0.127964	7.6812	0.685664	1
Solyc01g009330	SL3.0ch01	3450289	3452289	-	1937	12049	1898	11100	13.85	14.602	0.752683	0.039644	-5.12548e-15	-3.76036	1	1
Solyc01g009340	SL3.0ch01	3470634	3472634	+	2810	5966	4001	6736	32.019	37.264	5.24452	6.17311e-14	-1.88663	-0.296373	0.0866064	0.517843
Solyc01g009370	SL3.0ch01	3498232	3500232	-	7047	7755	8687	8391	47.608	50.867	3.25818	1.13451e-08	5.39787	-3.35572	0.116269	0.608659
Solyc01g009390	SL3.0ch01	3535062	3537062	-	5223	6567	5566	6449	44.3	46.325	2.02517	0.00122502	-0.584537	4.40821	0.0867438	0.517972
Solyc01g009400	SL3.0ch01	3538576	3540576	+	1430	4552	1638	4588	23.905	26.309	2.40398	0.00162081	-5.12548e-15	-3.87399	1	1
Solyc01g009410	SL3.0ch01	3543927	3545927	+	4699	7679	5636	8369	37.963	40.243	2.28026	0.000136418	-5.12548e-15	-3.87342	1	1
Solyc01g009430	SL3.0ch01	3570152	3572152	-	6222	9146	7772	9983	40.487	43.774	3.28686	2.91892e-09	-1.08386	7.86031	0.0179722	0.194856
Solyc01g009470	SL3.0ch01	3633992	3635992	-	3798	8582	4342	8666	30.679	33.379	2.70095	4.73631e-06	-5.12548e-15	-1.43529	1	1
Solyc01g009500	SL3.0ch01	3671459	3673459	+	6541	8083	7336	8661	44.728	45.859	1.13075	0.0256659	-0.480259	3.14389	0.227734	0.851694
Solyc01g009520	SL3.0ch01	3712707	3714707	+	5648	8847	7111	10143	38.965	41.214	2.24847	4.48317e-05	0.241689	7.84449	0.39539	1
Solyc01g009540	SL3.0ch01	3717705	3719705	+	1890	4674	2108	4732	28.793	30.819	2.02529	0.00664149	-5.12548e-15	-3.91086	1	1
Solyc01g009550	SL3.0ch01	3741980	3743980	+	12702	9016	14899	9959	58.486	59.936	1.45039	0.00108559	-5.12548e-15	-3.91086	1	1
Solyc01g009635	SL3.0ch01	3815307	3817307	-	2651	6920	3584	7168	27.698	33.333	5.63508	1.47501e-17	-5.12548e-15	-3.91086	1	1
Solyc01g009640	SL3.0ch01	3816190	3818190	-	1351	4691	1540	4313	22.36	26.311	3.95115	7.19421e-07	-5.12548e-15	-3.91086	1	1
Solyc01g009650	SL3.0ch01	3819523	3821523	+	1831	4389	2983	5005	29.437	37.344	7.90622	2.73168e-22	-1.75982	-3.87229	1	1
Solyc01g009645	SL3.0ch01	3819590	3821590	+	1831	4792	2874	5251	27.646	35.372	7.72623	7.18432e-23	-5.12548e-15	-3.91086	1	1
Solyc01g009690	SL3.0ch01	3915149	3917149	-	1160	1779	1270	1440	39.469	46.863	7.39426	3.41368e-08	1.17399	3.33846	0.11797	0.613218
Solyc01g009695	SL3.0ch01	3908955	3910955	+	213	601	250	492	26.167	33.693	7.52565	0.000941228	-5.12548e-15	-3.87098	1	1
Solyc01g009700	SL3.0ch01	3910981	3912981	+	904	2209	790	1406	29.04	35.974	6.93499	1.45277e-07	1.07596	1.62173	0.208736	0.817305
Solyc01g009710	SL3.0ch01	3919295	3921295	+	2587	3406	3350	2932	43.167	53.327	10.1599	2.15616e-28	2.62314	-2.09358	0.547965	1
Solyc01g009730	SL3.0ch01	3982582	3984582	-	2614	6390	2687	5807	29.032	31.634	2.60255	0.00015926	-5.12548e-15	-3.91086	1	1
Solyc01g009740	SL3.0ch01	4038809	4040809	-	600	4686	615	4219	11.351	12.722	1.37165	0.019153	-5.12548e-15	-3.91086	1	1
Solyc01g009750	SL3.0ch01	4060684	4062684	-	7773	7983	7405	6857	49.334	51.921	2.5876	8.28547e-06	-0.142256	7.6776	0.632041	1
Solyc01g009760	SL3.0ch01	4070550	4072550	+	7628	8676	8669	9260	46.786	48.352	1.56577	0.00257406	1.01826	2.49585	0.0892086	0.526624
Solyc01g009770	SL3.0ch01	4093600	4095600	-	4350	6818	5058	6879	38.951	42.372	3.42188	1.81931e-07	0.303075	2.9834	0.559116	1
Solyc01g009790	SL3.0ch01	4173224	4175224	+	5001	4025	4957	3437	55.407	59.054	3.64748	1.46149e-06	-5.12548e-15	-3.91086	1	1
Solyc01g009810	SL3.0ch01	4183116	4185116	+	4140	7392	5098	7944	35.9	39.089	3.18899	3.58102e-07	9.16059	0.898053	0.000480908	0.0136408
Solyc01g009830	SL3.0ch01	4257069	4259069	+	5855	8319	8732	9324	41.308	48.361	7.05263	2.24775e-35	3.31686	3.68651	0.000146797	0.00537977
Solyc01g009840	SL3.0ch01	4274481	4276481	-	3465	6938	5054	9129	33.308	35.634	2.32651	0.000133534	-3.80131	-3.69406	0.291812	0.958582
Solyc01g009850	SL3.0ch01	4301092	4303092	+	9090	10768	10552	11433	45.775	47.996	2.22136	6.16362e-06	0.0332272	2.41351	0.947377	1
Solyc01g009845	SL3.0ch01	4301092	4303092	+	9090	10768	10552	11433	45.775	47.996	2.22136	6.16362e-06	-1.96067	-3.52473	1	1
Solyc01g009870	SL3.0ch01	4342363	4344363	-	4939	6977	6557	8295	41.448	44.149	2.70046	9.79882e-06	3.84486	5.90475	2.17505e-06	0.000192567
Solyc01g009880	SL3.0ch01	4344966	4346966	+	2583	5243	3635	5426	33.005	40.117	7.11162	7.51977e-21	-5.12548e-15	-3.91086	1	1
Solyc01g009890	SL3.0ch01	4356474	4358474	+	3775	7022	4263	5886	34.963	42.004	7.04072	1.02427e-24	-5.12548e-15	-3.91086	1	1
Solyc01g009920	SL3.0ch01	4428529	4430529	-	2553	7216	2957	7534	26.134	28.186	2.05238	0.000801361	1.92286	-3.51775	1	1
Solyc01g009980	SL3.0ch01	4518809	4520809	+	4054	6661	5463	7617	37.835	41.766	3.93124	1.40554e-09	-5.12548e-15	-3.91086	1	1
Solyc01g010000	SL3.0ch01	4551904	4553904	-	3641	7843	3952	7776	31.705	33.697	1.99215	0.000907687	-0.11934	3.62062	0.717082	1
Solyc01g010020	SL3.0ch01	4594290	4596290	-	864	4972	1320	5032	14.805	20.781	5.9762	2.99657e-17	1.07259	1.33466	0.170125	0.741983
Solyc01g010030	SL3.0ch01	4607332	4609332	-	4248	8946	5637	9451	32.196	37.361	5.16436	5.20417e-19	-0.728614	2.9052	0.0677937	0.453415
Solyc01g010035	SL3.0ch01	4595475	4597475	+	308	912	452	1024	25.246	30.623	5.3774	0.00158552	-3.7346	-3.08346	0.332632	1
Solyc01g010060	SL3.0ch01	4624224	4626224	-	7182	7272	9347	8801	49.689	51.504	1.81563	0.000840561	0.830056	5.49708	0.0823773	0.505745
Solyc01g010090	SL3.0ch01	4768431	4770431	+	20511	9153	23976	9641	69.144	71.321	2.17664	4.19634e-09	-5.12548e-15	-3.91086	1	1
Solyc01g010085	SL3.0ch01	4768542	4770542	+	19892	9205	22957	9705	68.364	70.287	1.92214	3.2016e-07	-5.12548e-15	-3.91086	1	1
Solyc01g010087	SL3.0ch01	4771475	4773475	+	3130	4137	3494	4207	43.071	45.371	2.29931	0.00321786	-5.12548e-15	-3.91086	1	1
Solyc01g010140	SL3.0ch01	4819924	4821924	-	816	5925	958	5348	12.105	15.192	3.08685	4.17335e-07	-5.12548e-15	-3.87151	1	1
Solyc01g010150	SL3.0ch01	4872999	4874999	+	2656	1517	3507	1543	63.647	69.446	5.79829	7.6013e-09	-0.451255	3.21887	0.388699	1
Solyc01g010160	SL3.0ch01	4885380	4887380	-	5283	5023	5422	4719	51.261	53.466	2.20473	0.00117593	-2.36211	1.27981	0.00107087	0.0248237
Solyc01g010190	SL3.0ch01	4918301	4920301	+	11095	9903	13276	10476	52.838	55.894	3.05587	1.99554e-10	-1.46156	5.22372	6.16694e-05	0.00275355
Solyc01g010200	SL3.0ch01	4922844	4924844	+	3832	10794	4506	12153	26.2	27.048	0.848524	0.0453725	-0.74616	8.66573	0.0294434	0.269635
Solyc01g010230	SL3.0ch01	4944699	4946699	-	1012	4679	1364	4452	17.782	23.453	5.67008	1.71667e-13	-0.774473	6.51727	0.0526254	0.390262
Solyc01g010295	SL3.0ch01	5029668	5031668	-	2556	10488	3270	10987	19.595	22.936	3.34089	3.9294e-11	0.154028	1.18397	0.753313	1
Solyc01g010300	SL3.0ch01	5055360	5057360	-	3427	7854	3312	7172	30.379	31.591	1.21248	0.0287579	-5.12548e-15	-3.2448	1	1
Solyc01g010315	SL3.0ch01	5088779	5090779	-	5948	8527	7042	8516	41.092	45.263	4.17135	9.00442e-13	-3.82429	-3.59863	0.231367	0.857837
Solyc01g010350	SL3.0ch01	5097729	5099729	-	9284	8214	11169	8861	53.057	55.761	2.70387	2.26216e-07	-5.12548e-15	-3.47068	1	1
Solyc01g010370	SL3.0ch01	5140792	5142792	-	2281	8951	3088	11170	20.308	21.658	1.34997	0.00558937	0.169785	1.90014	0.735078	1
Solyc01g010400	SL3.0ch01	5246952	5248952	-	2845	4338	2912	4102	39.607	41.517	1.90956	0.012161	-5.12548e-15	-3.91086	1	1
Solyc01g010410	SL3.0ch01	5253863	5255863	+	3481	2904	4586	3258	54.518	58.465	3.94667	2.87036e-06	0.411011	2.64989	0.400864	1
Solyc01g010420	SL3.0ch01	5276736	5278736	+	2087	8973	2091	8071	18.87	20.577	1.70686	0.00133414	-3.30861	0.157691	0.0219561	0.223485
Solyc01g010440	SL3.0ch01	5292953	5294953	-	6547	6290	7384	6482	51.001	53.253	2.25155	0.000197181	-0.273853	6.10506	0.405391	1
Solyc01g010460	SL3.0ch01	5298821	5300821	+	6661	9609	7767	9401	40.94	45.241	4.30077	7.64372e-15	0.506301	1.60746	0.342365	1
Solyc01g010480	SL3.0ch01	5314476	5316476	-	5641	10136	8605	11488	35.755	42.826	7.07128	7.59006e-41	0.191948	6.3312	0.597283	1
Solyc01g010497	SL3.0ch01	5370286	5372286	-	3746	4355	5173	5331	46.241	49.248	3.0067	4.44952e-05	-5.12548e-15	-3.91086	1	1
Solyc01g010502	SL3.0ch01	5411620	5413620	+	1752	6416	1701	5779	21.45	22.741	1.29108	0.028293	-5.12548e-15	-3.91086	1	1
Solyc01g010504	SL3.0ch01	5419795	5421795	+	7058	5544	6771	4906	56.007	57.986	1.9788	0.00137808	-5.12548e-15	-3.91086	1	1
Solyc01g010506	SL3.0ch01	5441999	5443999	+	4825	9949	5720	9523	32.659	37.525	4.8667	5.03976e-18	-5.12548e-15	-3.91086	1	1
Solyc01g010510	SL3.0ch01	5455874	5457874	-	10567	8552	13066	10152	55.27	56.275	1.00568	0.021232	-0.816105	0.539897	0.159739	0.719032
Solyc01g010550	SL3.0ch01	5502932	5504932	-	3448	4959	3602	4335	41.013	45.382	4.36895	2.91526e-08	-5.12548e-15	-3.91086	1	1
Solyc01g010570	SL3.0ch01	5530171	5532171	-	9232	9147	9975	9416	50.231	51.441	1.21015	0.0110514	-0.615759	5.45752	0.0478473	0.368044
Solyc01g010580	SL3.0ch01	5532841	5534841	+	7234	6111	10290	7536	54.208	57.725	3.5171	1.20454e-09	0.115889	8.11103	0.692073	1
Solyc01g010590	SL3.0ch01	5537228	5539228	+	4813	6032	5347	6106	44.38	46.686	2.30656	0.000449143	0.280658	4.55317	0.333902	1
Solyc01g010660	SL3.0ch01	5615545	5617545	+	11303	9948	13087	10910	53.188	54.536	1.3479	0.00280597	2.70871	5.97609	2.48822e-07	3.35841e-05
Solyc01g010670	SL3.0ch01	5633585	5635585	+	4043	6911	4233	6196	36.909	40.589	3.67985	5.15523e-08	-5.12548e-15	-3.91086	1	1
Solyc01g010690	SL3.0ch01	5646186	5648186	+	4542	8622	4994	8819	34.503	36.154	1.65116	0.00310246	-5.12548e-15	-3.69398	1	1
Solyc01g010700	SL3.0ch01	5674443	5676443	-	8501	8623	10374	9810	49.644	51.397	1.75337	0.000583652	0.606687	5.0912	0.0266533	0.254291
Solyc01g010780	SL3.0ch01	5781530	5783530	-	9742	7997	12273	8739	54.919	58.409	3.49094	1.21962e-11	-0.0963006	5.67425	0.723236	1
Solyc01g010793	SL3.0ch01	5788659	5790659	+	84	714	97	396	10.526	19.675	9.14914	7.81837e-06	-5.12548e-15	-3.91086	1	1
Solyc01g010810	SL3.0ch01	6156685	6158685	-	6455	8781	7409	9706	42.367	43.29	0.922749	0.0476229	0.0530733	4.23894	0.871853	1
Solyc01g010820	SL3.0ch01	6160833	6162833	+	11553	7066	16403	8937	62.05	64.732	2.68213	1.326e-08	-0.414867	5.09144	0.134773	0.658009
Solyc01g010840	SL3.0ch01	6220360	6222360	+	3209	6812	4177	7360	32.023	36.205	4.1825	2.40645e-10	-5.12548e-15	-3.91086	1	1
Solyc01g010850	SL3.0ch01	6235529	6237529	-	3138	6328	3263	5937	33.15	35.467	2.31717	0.000656907	-5.12548e-15	-3.91086	1	1
Solyc01g010870	SL3.0ch01	6256909	6258909	-	2259	5676	2656	5449	28.469	32.77	4.30109	6.5529e-09	0.201171	7.58727	0.511166	1
Solyc01g010880	SL3.0ch01	6263981	6265981	-	1528	1941	1704	1798	44.047	48.658	4.61063	0.00010682	2.48061	4.08155	1.21434e-06	0.000120987
Solyc01g010910	SL3.0ch01	6374750	6376750	+	4578	7518	4938	7466	37.847	39.81	1.96252	0.00119264	-5.12548e-15	-3.69517	1	1
Solyc01g010920	SL3.0ch01	6384358	6386358	-	2064	3480	2338	3236	37.229	41.945	4.71531	4.95323e-07	0.44577	0.697166	0.431083	1
Solyc01g010937	SL3.0ch01	6414523	6416523	+	3285	5117	4069	5562	39.098	42.249	3.15115	1.86274e-05	2.63388	-3.20061	0.597989	1
Solyc01g010950	SL3.0ch01	6457538	6459538	-	6022	9780	6501	9817	38.109	39.839	1.73034	0.0011082	-0.246169	4.75747	0.385237	1
Solyc01g010960	SL3.0ch01	6544663	6546663	+	3212	5104	3208	4462	38.624	41.825	3.20095	3.67596e-05	1.80309	-3.6613	1	1
Solyc01g010990	SL3.0ch01	6792770	6794770	+	2920	5433	4341	6636	34.958	39.546	4.58882	1.49361e-10	1.04586	4.10251	0.00270044	0.0503421
Solyc01g011010	SL3.0ch01	6819431	6821431	+	1747	1767	1720	1508	49.715	53.284	3.56834	0.00233444	1.33383	1.33349	0.0416974	0.337609
Solyc01g011020	SL3.0ch01	6898990	6900990	-	3957	3673	5708	4856	51.861	54.033	2.17149	0.00259145	-5.12548e-15	-3.74906	1	1
Solyc01g011060	SL3.0ch01	6986946	6988946	-	1723	2438	2362	3054	41.408	43.612	2.20321	0.0177326	-5.12548e-15	-3.91086	1	1
Solyc01g011070	SL3.0ch01	7101206	7103206	-	2600	6547	2861	6658	28.425	30.056	1.63106	0.00866335	-5.12548e-15	-3.91086	1	1
Solyc01g011090	SL3.0ch01	7547993	7549993	+	12150	10291	15082	11640	54.142	56.44	2.29841	4.50626e-07	-5.12548e-15	-3.91086	1	1
Solyc01g011091	SL3.0ch01	7547993	7549993	+	12150	10291	15082	11640	54.142	56.44	2.29841	4.50626e-07	-0.186096	-1.75331	1	1
Solyc01g011092	SL3.0ch01	7555142	7557142	+	1608	3455	1274	2421	31.76	34.479	2.7192	0.00480492	3.69015	-3.6761	0.435215	1
Solyc01g011095	SL3.0ch01	7604209	7606209	+	2033	7580	2944	8464	21.148	25.806	4.65801	8.41781e-15	1.06607	-0.474966	0.31124	0.985134
Solyc01g011110	SL3.0ch01	7607035	7609035	+	430	4344	519	4082	9.007	11.28	2.27303	0.000232121	-5.12548e-15	-3.91086	1	1
Solyc01g011096	SL3.0ch01	7801032	7803032	-	867	2027	1781	2659	29.959	40.113	10.1541	3.00304e-18	-5.12548e-15	-3.91086	1	1
Solyc01g011098	SL3.0ch01	7928483	7930483	-	657	2636	735	2563	19.951	22.286	2.33482	0.0125691	-5.12548e-15	-3.91086	1	1
Solyc01g011180	SL3.0ch01	8013330	8015330	-	1043	1509	1637	1794	40.87	47.712	6.84213	2.0278e-07	3.13238	-3.17512	0.46659	1
Solyc01g011220	SL3.0ch01	8086667	8088667	-	294	2522	687	4252	10.44	13.91	3.46936	9.37019e-06	-3.60933	-1.4162	0.00458889	0.0739349
Solyc01g011225	SL3.0ch01	8087887	8089887	-	294	2146	537	3207	12.049	14.343	2.29377	0.00651529	-2.06917	-2.39074	0.164542	0.729106
Solyc01g011237	SL3.0ch01	8131924	8133924	-	1292	3518	1472	3354	26.861	30.501	3.64074	7.32559e-05	-5.12548e-15	-3.91086	1	1
Solyc01g011270	SL3.0ch01	8180298	8182298	-	4057	6152	4900	6833	39.739	41.763	2.0231	0.00171317	-5.12548e-15	-3.91086	1	1
Solyc01g011300	SL3.0ch01	8409393	8411393	-	3562	6685	3424	5829	34.761	37.004	2.24282	0.000828942	-5.12548e-15	-3.91086	1	1
Solyc01g011320	SL3.0ch01	8584199	8586199	-	1587	3358	1596	2763	32.093	36.614	4.52088	5.27061e-06	-5.12548e-15	-3.91086	1	1
Solyc01g011330	SL3.0ch01	8602063	8604063	-	3162	6835	3614	6601	31.629	35.379	3.74986	2.79558e-08	-2.65548	-3.82996	0.582471	1
Solyc01g011333	SL3.0ch01	8615534	8617534	-	3758	5026	3928	4645	42.782	45.818	3.03594	5.4155e-05	-5.12548e-15	-3.87203	1	1
Solyc01g011335	SL3.0ch01	8618732	8620732	-	2618	3745	3755	4769	41.144	44.052	2.90797	0.000330599	-5.12548e-15	-3.91086	1	1
Solyc01g011337	SL3.0ch01	8620776	8622776	-	3225	4131	5362	5691	43.842	48.512	4.66995	1.00412e-09	-5.12548e-15	-3.91086	1	1
Solyc01g011340	SL3.0ch01	8628052	8630052	+	11386	9218	13833	10285	55.261	57.356	2.09439	9.26737e-06	0.0407506	5.16121	0.882102	1
Solyc01g011350	SL3.0ch01	8648355	8650355	-	7837	8974	9071	9878	46.618	47.871	1.25231	0.0105528	-0.598965	6.56598	0.0396083	0.325893
Solyc01g011370	SL3.0ch01	8689408	8691408	+	6907	8090	8101	8419	46.056	49.038	2.98165	1.76745e-07	-5.12548e-15	-3.91086	1	1
Solyc01g011390	SL3.0ch01	8706149	8708149	-	1945	6638	2195	5637	22.661	28.026	5.36497	1.09063e-14	-3.81717	-3.50037	0.247605	0.886077
Solyc01g011397	SL3.0ch01	8853338	8855338	+	1362	3701	1904	4238	26.901	31	4.09863	2.49746e-06	-5.12548e-15	-3.91086	1	1
Solyc01g011470	SL3.0ch01	9287912	9289912	-	773	1696	1449	2570	31.308	36.054	4.74552	8.38251e-05	-5.12548e-15	-3.91086	1	1
Solyc01g011480	SL3.0ch01	9329458	9331458	-	2267	4759	3297	5105	32.266	39.241	6.97479	1.21522e-18	-5.12548e-15	-3.91086	1	1
Solyc01g011490	SL3.0ch01	9339650	9341650	+	2326	5798	2517	5116	28.631	32.975	4.34402	6.61198e-09	-5.12548e-15	-3.91086	1	1
Solyc01g011497	SL3.0ch01	9372169	9374169	-	4174	8103	4380	8060	33.999	35.209	1.21047	0.0248426	-5.12548e-15	-3.69581	1	1
Solyc01g011530	SL3.0ch01	9504318	9506318	+	202	736	370	1010	21.535	26.812	5.27641	0.002559	-5.12548e-15	-3.91086	1	1
Solyc01g011540	SL3.0ch01	9526758	9528758	-	1101	2699	965	1867	28.974	34.075	5.10117	1.03022e-05	-5.12548e-15	-3.91086	1	1
Solyc01g012540	SL3.0ch01	9577178	9579178	-	1113	3117	1303	2806	26.312	31.711	5.39882	8.15067e-08	-5.12548e-15	-3.91086	1	1
Solyc01g012550	SL3.0ch01	9591204	9593204	+	539	1777	570	1650	23.273	25.676	2.40279	0.0322599	-5.12548e-15	-3.91086	1	1
Solyc01g012570	SL3.0ch01	9632062	9634062	-	438	1407	618	1157	23.74	34.817	11.0771	6.63554e-13	-5.12548e-15	-3.91086	1	1
Solyc01g012590	SL3.0ch01	9687827	9689827	-	3205	5700	4015	6339	35.991	38.777	2.78627	6.53941e-05	-5.12548e-15	-3.91086	1	1
Solyc01g012630	SL3.0ch01	9744890	9746890	-	534	1255	590	1091	29.849	35.098	5.24908	0.000809106	-5.12548e-15	-3.91086	1	1
Solyc01g012640	SL3.0ch01	9745798	9747798	-	444	1352	698	1597	24.722	30.414	5.69234	5.71105e-05	-5.12548e-15	-3.91086	1	1
Solyc01g012650	SL3.0ch01	9763608	9765608	-	1101	3198	1280	3378	25.611	27.48	1.869	0.025136	-5.12548e-15	-3.91086	1	1
Solyc01g012690	SL3.0ch01	9814096	9816096	-	3721	7569	4861	7869	32.958	38.185	5.22702	1.42595e-16	-5.12548e-15	-3.91086	1	1
Solyc01g012710	SL3.0ch01	9836182	9838182	+	1761	3703	2173	3923	32.229	35.646	3.41719	0.000102724	-5.12548e-15	-3.91086	1	1
Solyc01g012730	SL3.0ch01	9918301	9920301	-	180	493	227	386	26.746	37.031	10.2851	8.38965e-05	-5.12548e-15	-3.91086	1	1
Solyc01g013760	SL3.0ch01	10078159	10080159	-	618	1843	897	2203	25.112	28.935	3.82374	0.00106035	-5.12548e-15	-3.91086	1	1
Solyc01g013810	SL3.0ch01	10112531	10114531	+	165	546	704	1636	23.207	30.085	6.87872	0.000297817	-5.12548e-15	-3.91086	1	1
Solyc01g013820	SL3.0ch01	10136325	10138325	+	998	1874	966	1519	34.749	38.873	4.12394	0.00138283	-5.12548e-15	-3.91086	1	1
Solyc01g013850	SL3.0ch01	10191321	10193321	-	230	609	499	1074	27.414	31.723	4.30924	0.0161626	-5.12548e-15	-3.91086	1	1
Solyc01g013860	SL3.0ch01	10189659	10191659	+	473	1527	614	1281	23.65	32.401	8.75106	2.21389e-09	-5.12548e-15	-3.91086	1	1
Solyc01g013885	SL3.0ch01	10233185	10235185	+	1953	2965	2479	3447	39.711	41.833	2.12134	0.0144214	0.164753	-1.09815	0.880592	1
Solyc01g013890	SL3.0ch01	10283861	10285861	+	3622	6446	4559	7166	35.975	38.883	2.90736	1.04684e-05	0.0634956	-2.71284	1	1
Solyc01g013910	SL3.0ch01	10320146	10322146	-	308	1449	524	1649	17.53	24.114	6.58425	6.27764e-07	-5.12548e-15	-3.91086	1	1
Solyc01g013915	SL3.0ch01	10356480	10358480	+	766	2153	957	2070	26.242	31.615	5.3736	5.98173e-06	-0.0761767	-3.22081	1	1
Solyc01g013960	SL3.0ch01	10503204	10505204	-	690	2538	582	1840	21.375	24.03	2.65426	0.0110057	-5.12548e-15	-3.91086	1	1
Solyc01g013980	SL3.0ch01	10650390	10652390	+	3433	6086	3042	4928	36.065	38.168	2.10342	0.00281798	-5.12548e-15	-3.91086	1	1
Solyc01g013995	SL3.0ch01	10737461	10739461	+	1831	6112	1898	5952	23.052	24.178	1.1266	0.0491025	-5.12548e-15	-3.87203	1	1
Solyc01g014010	SL3.0ch01	10875001	10877001	+	1149	4577	1380	4810	20.066	22.294	2.22766	0.00211136	-5.12548e-15	-3.91086	1	1
Solyc01g014020	SL3.0ch01	10992293	10994293	-	2446	5946	2733	6270	29.147	30.357	1.20974	0.0412007	-5.12548e-15	-3.91086	1	1
Solyc01g014050	SL3.0ch01	11040787	11042787	-	1900	3736	1991	3063	33.712	39.395	5.68269	2.21022e-09	-5.12548e-15	-3.91086	1	1
Solyc01g014065	SL3.0ch01	11081708	11083708	+	216	4645	271	3540	4.444	7.111	2.66746	1.42146e-07	-5.12548e-15	-3.91086	1	1
Solyc01g014070	SL3.0ch01	11089333	11091333	-	5432	6098	7111	7027	47.112	50.297	3.18519	5.1987e-07	-5.12548e-15	-3.91086	1	1
Solyc01g014075	SL3.0ch01	11163804	11165804	-	2874	4661	3346	5019	38.142	40	1.858	0.00990022	-5.12548e-15	-3.91086	1	1
Solyc01g014095	SL3.0ch01	11397087	11399087	+	1299	2790	1712	3016	31.768	36.21	4.44166	1.29744e-05	-5.12548e-15	-3.91086	1	1
Solyc01g014100	SL3.0ch01	11512844	11514844	+	4471	5928	5071	6277	42.995	44.686	1.69177	0.00748345	-5.12548e-15	-0.916662	1	1
Solyc01g014140	SL3.0ch01	11627709	11629709	+	4607	7651	5331	8381	37.584	38.878	1.29474	0.0181897	-5.12548e-15	-2.27959	1	1
Solyc01g014143	SL3.0ch01	11645826	11647826	+	2282	3486	1663	2078	39.563	44.453	4.89025	2.90883e-06	-5.12548e-15	-3.87171	1	1
Solyc01g014150	SL3.0ch01	11649377	11651377	+	2148	4073	2569	4009	34.528	39.054	4.52621	1.64796e-07	-5.12548e-15	-3.91086	1	1
Solyc01g014147	SL3.0ch01	11677273	11679273	+	2180	5393	2352	5472	28.786	30.061	1.27487	0.041921	-5.12548e-15	-3.91086	1	1
Solyc01g014170	SL3.0ch01	11679554	11681554	+	484	952	1786	2495	33.705	41.719	8.01449	9.96131e-08	-5.12548e-15	-3.91086	1	1
Solyc01g014180	SL3.0ch01	11697872	11699872	-	4849	8142	6455	8256	37.326	43.879	6.55289	1.67917e-27	0.1355	9.18962	0.646601	1
Solyc01g014185	SL3.0ch01	11755390	11757390	+	2745	5621	3401	5905	32.811	36.546	3.73493	2.66982e-07	-5.12548e-15	-3.91086	1	1
Solyc01g014210	SL3.0ch01	11779788	11781788	+	2126	3019	2427	3019	41.322	44.565	3.24315	0.000600743	-5.12548e-15	-3.91086	1	1
Solyc01g014220	SL3.0ch01	11795804	11797804	+	2842	3947	3535	4244	41.862	45.443	3.58102	1.49716e-05	-5.12548e-15	-3.79591	1	1
Solyc01g014225	SL3.0ch01	11797367	11799367	+	2855	4508	3411	4565	38.775	42.766	3.99084	6.86113e-07	-5.12548e-15	-3.87079	1	1
Solyc01g014230	SL3.0ch01	11831053	11833053	-	7399	8903	7948	9019	45.387	46.844	1.4568	0.00491635	-0.295645	4.42869	0.333555	1
Solyc01g014240	SL3.0ch01	11853058	11855058	+	1632	2610	2475	3685	38.472	40.179	1.70615	0.0417886	-5.12548e-15	-3.91086	1	1
Solyc01g014260	SL3.0ch01	11871960	11873960	+	1390	3215	1507	3217	30.185	31.901	1.71635	0.0375573	-5.12548e-15	-3.91086	1	1
Solyc01g014270	SL3.0ch01	11888252	11890252	+	6706	6344	7373	6023	51.387	55.039	3.65184	4.9914e-09	0.944018	4.38718	0.00242715	0.0463009
Solyc01g014310	SL3.0ch01	11962727	11964727	-	5586	8117	6591	8586	40.765	43.428	2.66276	5.43964e-06	-5.12548e-15	-3.91086	1	1
Solyc01g014320	SL3.0ch01	11978676	11980676	+	2011	3082	2570	3189	39.486	44.626	5.14023	9.96852e-08	-5.12548e-15	-3.87342	1	1
Solyc01g014360	SL3.0ch01	12157214	12159214	-	1750	6130	2021	6185	22.208	24.628	2.4202	0.000249824	-5.12548e-15	-3.91086	1	1
Solyc01g014390	SL3.0ch01	12867978	12869978	+	4466	5581	5578	5531	44.451	50.212	5.76046	2.39331e-16	7.0936	0.4447	5.7563e-08	1.01926e-05
Solyc01g014393	SL3.0ch01	12961959	12963959	-	1506	3444	1909	3212	30.424	37.278	6.85363	1.02842e-12	-5.12548e-15	-3.91086	1	1
Solyc01g014400	SL3.0ch01	13180771	13182771	+	441	1196	879	1778	26.94	33.082	6.1429	2.3797e-05	-5.12548e-15	-3.91086	1	1
Solyc01g014420	SL3.0ch01	13465375	13467375	+	311	820	837	1927	27.498	30.282	2.78441	0.0443613	-5.12548e-15	-3.91086	1	1
Solyc01g014430	SL3.0ch01	13487179	13489179	+	932	2334	1441	2995	28.536	32.484	3.94778	0.000184376	-5.12548e-15	-3.91086	1	1
Solyc01g014460	SL3.0ch01	13858627	13860627	-	3474	5916	3782	5884	36.997	39.127	2.13003	0.00179425	-5.12548e-15	-3.91086	1	1
Solyc01g014480	SL3.0ch01	13895626	13897626	-	7582	7269	10672	9420	51.054	53.116	2.06187	0.000119974	-0.10333	4.30288	0.726837	1
Solyc01g014490	SL3.0ch01	13922467	13924467	-	3142	5484	3624	5848	36.425	38.26	1.83537	0.00684292	-0.116	4.18434	0.698432	1
Solyc01g014495	SL3.0ch01	13925855	13927855	-	7278	3692	8423	3823	66.345	68.782	2.43707	7.16518e-05	0.0134612	2.59064	0.981839	1
Solyc01g014510	SL3.0ch01	13947910	13949910	+	3665	6992	4010	6668	34.391	37.554	3.16331	1.84306e-06	-5.12548e-15	-3.91086	1	1
Solyc01g014520	SL3.0ch01	13958600	13960600	+	2034	2872	3260	3728	41.459	46.651	5.19196	3.27574e-08	-4.45492	-3.57627	0.0914232	0.533682
Solyc01g014534	SL3.0ch01	14018917	14020917	+	3823	12929	4909	15878	22.821	23.616	0.794566	0.0363502	-5.12548e-15	-3.70051	1	1
Solyc01g014535	SL3.0ch01	14023523	14025523	+	698	2106	677	1762	24.893	27.757	2.86427	0.0115431	-5.12548e-15	-3.91086	1	1
Solyc01g014536	SL3.0ch01	14023874	14025874	+	1239	3890	1558	3666	24.157	29.824	5.66713	1.84435e-10	-5.12548e-15	-3.91086	1	1
Solyc01g014537	SL3.0ch01	14096399	14098399	+	567	1548	629	1388	26.809	31.185	4.37642	0.00142897	-5.12548e-15	-3.91086	1	1
Solyc01g150000	SL3.0ch01	14177441	14179441	+	1412	4741	1912	5455	22.948	25.954	3.00542	5.15964e-05	-5.12548e-15	-3.91086	1	1
Solyc01g014540	SL3.0ch01	14259949	14261949	+	9499	3692	19378	5422	72.011	78.137	6.12588	1.60296e-38	-5.12548e-15	-3.91086	1	1
Solyc01g014550	SL3.0ch01	14266561	14268561	+	3012	2854	3303	2716	51.347	54.876	3.52948	0.000107195	-0.632998	-0.852597	0.550582	1
Solyc01g014561	SL3.0ch01	14317592	14319592	+	2249	7541	2617	6765	22.972	27.894	4.92142	1.75898e-14	-5.12548e-15	-3.91086	1	1
Solyc01g014562	SL3.0ch01	14321656	14323656	+	690	1847	757	1667	27.197	31.229	4.0319	0.00140534	-5.12548e-15	-3.91086	1	1
Solyc01g014566	SL3.0ch01	14364901	14366901	+	954	3790	1263	4198	20.11	23.128	3.01802	0.000193866	-5.12548e-15	-3.91086	1	1
Solyc01g014620	SL3.0ch01	14375008	14377008	-	5962	9490	6568	9440	38.584	41.029	2.44548	1.02992e-05	-5.12548e-15	-3.56808	1	1
Solyc01g014623	SL3.0ch01	14378083	14380083	+	304	1000	434	1193	23.313	26.675	3.36198	0.0216754	-5.12548e-15	-3.91086	1	1
Solyc01g014640	SL3.0ch01	14406438	14408438	+	2200	6188	3251	6969	26.228	31.81	5.58223	3.04842e-16	-5.12548e-15	-3.91086	1	1
Solyc01g014643	SL3.0ch01	14406828	14408828	+	2017	5417	2951	5924	27.132	33.251	6.11861	1.14e-16	-5.12548e-15	-3.91086	1	1
Solyc01g014660	SL3.0ch01	14416763	14418763	-	3807	7844	4931	9033	32.675	35.312	2.63692	9.86658e-06	-3.75754	-3.74195	0.228442	0.853011
Solyc01g014680	SL3.0ch01	14455342	14457342	+	5493	5494	6232	5540	49.995	52.939	2.94373	9.88414e-06	1.81461	-3.79435	1	1
Solyc01g014690	SL3.0ch01	14456097	14458097	+	4770	5026	5686	5423	48.693	51.184	2.49038	0.000270062	0.341719	-2.10512	0.871649	1
Solyc01g014700	SL3.0ch01	14459666	14461666	-	11609	9404	14317	9955	55.247	58.986	3.73891	4.14791e-15	0.419859	-0.447603	0.760394	1
Solyc01g014715	SL3.0ch01	14521163	14523163	+	1218	6063	2285	7740	16.728	22.793	6.06455	4.04909e-22	-5.12548e-15	-3.91086	1	1
Solyc01g014725	SL3.0ch01	14609128	14611128	+	326	1562	327	972	17.267	25.173	7.90626	1.13084e-07	-5.12548e-15	-3.91086	1	1
Solyc01g014730	SL3.0ch01	14717876	14719876	-	2008	3262	2865	4283	38.102	40.081	1.97867	0.0145992	1.80909	-3.87049	1	1
Solyc01g014740	SL3.0ch01	14727641	14729641	+	4449	7705	5247	8612	36.605	37.86	1.25464	0.0204774	-1.78437	-2.81024	1	1
Solyc01g014760	SL3.0ch01	14939495	14941495	-	1394	3838	1651	3972	26.644	29.362	2.71782	0.00120583	-5.12548e-15	-3.91086	1	1
Solyc01g014770	SL3.0ch01	14972835	14974835	+	1700	6724	1828	6472	20.18	22.024	1.84366	0.00238714	-5.12548e-15	-3.91086	1	1
Solyc01g014780	SL3.0ch01	15013791	15015791	-	121	300	591	1140	28.741	34.142	5.40102	0.020564	-5.12548e-15	-3.91086	1	1
Solyc01g014790	SL3.0ch01	15047018	15049018	-	246	468	234	360	34.454	39.394	4.94016	0.0338952	-5.12548e-15	-3.91086	1	1
Solyc01g014800	SL3.0ch01	15050582	15052582	-	146	520	406	797	21.922	33.749	11.827	9.11649e-08	-5.12548e-15	-3.91086	1	1
Solyc01g014820	SL3.0ch01	15400912	15402912	-	2181	3512	2075	3106	38.31	40.05	1.73998	0.0333792	-5.12548e-15	-3.91086	1	1
Solyc01g014830	SL3.0ch01	15503442	15505442	-	1096	2559	1180	2411	29.986	32.86	2.87361	0.00533714	-5.12548e-15	-3.91086	1	1
Solyc01g014840	SL3.0ch01	15510115	15512115	-	8431	7132	8661	6663	54.173	56.519	2.34583	3.31113e-05	2.93866	2.97353	0.000790705	0.0197175
Solyc01g014850	SL3.0ch01	15522229	15524229	-	290	6578	454	8384	4.222	5.137	0.914428	0.00505441	-0.0779235	4.98838	0.793031	1
Solyc01g014860	SL3.0ch01	15523898	15525898	-	4878	7541	7466	9366	39.279	44.356	5.07746	1.57288e-17	0.301757	1.53387	0.52928	1
Solyc01g014910	SL3.0ch01	15743030	15745030	+	1588	5635	2141	6486	21.985	24.817	2.83211	2.91884e-05	-5.12548e-15	-3.91086	1	1
Solyc01g014920	SL3.0ch01	15907511	15909511	-	2344	8218	2764	8945	22.193	23.606	1.41301	0.00774606	-5.12548e-15	-3.91086	1	1
Solyc01g014930	SL3.0ch01	15953049	15955049	-	20	658	72	581	2.95	11.026	8.07618	6.92839e-09	-5.12548e-15	-3.91086	1	1
Solyc01g014940	SL3.0ch01	15955704	15957704	-	0	21	38	168	0	18.447	18.4466	0.0163604	-5.12548e-15	-3.91086	1	1
Solyc01g014990	SL3.0ch01	16487988	16489988	-	3977	6924	4594	7412	36.483	38.264	1.78131	0.00360668	-5.12548e-15	-3.91086	1	1
Solyc01g015000	SL3.0ch01	16517350	16519350	+	3928	8468	5028	9300	31.688	35.092	3.40449	7.33952e-09	-0.472622	-2.37536	0.705153	1
Solyc01g015010	SL3.0ch01	16522203	16524203	+	1913	3676	2317	3588	34.228	39.238	5.00999	4.28444e-08	-5.12548e-15	-3.91086	1	1
Solyc01g015050	SL3.0ch01	16660683	16662683	+	2248	4545	1903	3067	33.093	38.29	5.19685	1.09107e-08	-5.12548e-15	-3.91086	1	1
Solyc01g015060	SL3.0ch01	16663799	16665799	-	1802	4765	2680	5596	27.44	32.383	4.94256	1.53953e-10	-5.12548e-15	-3.91086	1	1
Solyc01g015070	SL3.0ch01	16667523	16669523	+	1776	5670	2573	5542	23.852	31.707	7.85498	9.072e-27	-5.12548e-15	-3.91086	1	1
Solyc01g015080	SL3.0ch01	16715127	16717127	-	3847	3016	3980	2796	56.054	58.737	2.68251	0.00117218	-5.12548e-15	-3.91086	1	1
Solyc01g015140	SL3.0ch01	16877128	16879128	-	1692	4443	2300	4809	27.579	32.353	4.77389	4.37097e-09	-5.12548e-15	-3.91086	1	1
Solyc01g015210	SL3.0ch01	17827380	17829380	+	2233	5072	2119	4454	30.568	32.238	1.66984	0.0193714	-5.12548e-15	-3.91086	1	1
Solyc01g015230	SL3.0ch01	17940655	17942655	-	1604	3144	1910	3302	33.783	36.646	2.86356	0.00198307	-5.12548e-15	-3.91086	1	1
Solyc01g015240	SL3.0ch01	17961496	17963496	+	2370	4833	3437	5804	32.903	37.193	4.28999	1.86349e-08	-5.12548e-15	-3.91086	1	1
Solyc01g015250	SL3.0ch01	18153661	18155661	-	2294	6523	3233	7595	26.018	29.858	3.83986	4.71796e-09	-5.12548e-15	-3.87171	1	1
Solyc01g015290	SL3.0ch01	18336641	18338641	+	1360	6061	2470	6732	18.326	26.842	8.51562	1.37188e-37	-5.12548e-15	-3.91086	1	1
Solyc01g015285	SL3.0ch01	18449626	18451626	-	721	2363	1569	4351	23.379	26.503	3.12465	0.000889642	-5.12548e-15	-3.91086	1	1
Solyc01g016350	SL3.0ch01	18965419	18967419	+	1413	3326	1296	2670	29.816	32.678	2.86134	0.0028382	-5.12548e-15	-3.91086	1	1
Solyc01g016390	SL3.0ch01	19405851	19407851	-	7072	10590	10104	13181	40.041	43.393	3.35198	2.40556e-11	-5.12548e-15	-3.91086	1	1
Solyc01g016435	SL3.0ch01	19665105	19667105	-	2698	7432	3256	7933	26.634	29.1	2.46625	5.731e-05	-5.12548e-15	-3.91086	1	1
Solyc01g016460	SL3.0ch01	19931727	19933727	-	30	1078	3137	5517	2.708	36.249	33.5416	4.67654e-150	-6.10599	-0.617724	9.78279e-05	0.00387928
Solyc01g016475	SL3.0ch01	20099939	20101939	+	3769	11527	4995	13358	24.64	27.216	2.57583	1.17572e-07	-5.12548e-15	-3.91086	1	1
Solyc01g016540	SL3.0ch01	20365492	20367492	+	3093	10367	4130	11468	22.979	26.478	3.49856	1.37641e-11	-5.12548e-15	-3.91086	1	1
Solyc01g016580	SL3.0ch01	20498873	20500873	+	3635	8803	3731	8218	29.225	31.224	1.99941	0.00053935	-5.12548e-15	-3.91086	1	1
Solyc01g016610	SL3.0ch01	20647551	20649551	+	1645	3711	1895	3777	30.713	33.41	2.69651	0.00176035	-5.12548e-15	-3.91086	1	1
Solyc01g016630	SL3.0ch01	20717568	20719568	+	3100	10518	3975	12720	22.764	23.81	1.04553	0.0184386	-5.12548e-15	-3.91086	1	1
Solyc01g016637	SL3.0ch01	20752213	20754213	-	1433	3178	1858	3643	31.078	33.776	2.69782	0.0026983	-5.12548e-15	-3.91086	1	1
Solyc01g016640	SL3.0ch01	20780575	20782575	-	768	2244	864	1906	25.498	31.191	5.69333	1.93319e-06	-5.12548e-15	-3.91086	1	1
Solyc01g016645	SL3.0ch01	20781111	20783111	-	1074	2690	1412	3021	28.533	31.852	3.31854	0.00084324	-5.12548e-15	-3.91086	1	1
Solyc01g016650	SL3.0ch01	20857209	20859209	-	2174	7435	2568	7503	22.625	25.499	2.87433	2.9955e-06	-5.12548e-15	-3.91086	1	1
Solyc01g016660	SL3.0ch01	20895446	20897446	+	1519	4579	1678	4278	24.91	28.173	3.26346	4.89772e-05	-5.12548e-15	-3.91086	1	1
Solyc01g016680	SL3.0ch01	21180565	21182565	+	672	1615	1117	2194	29.383	33.736	4.35256	0.000500511	-5.12548e-15	-3.91086	1	1
Solyc01g016690	SL3.0ch01	21247329	21249329	-	477	3284	650	3505	12.683	15.644	2.96101	0.000141224	-5.12548e-15	-3.91086	1	1
Solyc01g016697	SL3.0ch01	21330141	21332141	-	872	1332	1627	1703	39.564	48.859	9.29443	2.61364e-11	-5.12548e-15	-3.91086	1	1
Solyc01g016740	SL3.0ch01	21885371	21887371	-	2963	5268	3520	5601	35.998	38.592	2.5942	0.000345493	-5.12548e-15	-3.91086	1	1
Solyc01g016750	SL3.0ch01	21887084	21889084	-	3452	5642	3952	5657	37.959	41.128	3.16902	1.01173e-05	-5.12548e-15	-3.91086	1	1
Solyc01g016770	SL3.0ch01	21976695	21978695	+	3403	4725	6486	6515	41.868	49.888	8.02085	6.57542e-29	-5.12548e-15	-3.87079	1	1
Solyc01g016780	SL3.0ch01	21976998	21978998	+	2651	3629	5064	4904	42.213	50.803	8.58919	1.07947e-25	-5.12548e-15	-3.91086	1	1
Solyc01g016790	SL3.0ch01	22129741	22131741	+	1066	2057	681	816	34.134	45.491	11.3571	3.91918e-13	-5.12548e-15	-3.91086	1	1
Solyc01g016800	SL3.0ch01	22153123	22155123	-	2062	4367	2738	4349	32.073	38.634	6.5607	6.2359e-15	-5.12548e-15	-3.80323	1	1
Solyc01g016805	SL3.0ch01	22163190	22165190	+	3251	5133	3402	4945	38.776	40.757	1.98092	0.00571168	-1.49843	-0.924671	0.468321	1
Solyc01g016880	SL3.0ch01	22610247	22612247	+	2211	5213	2389	4667	29.782	33.858	4.07592	2.10549e-07	-5.12548e-15	-3.91086	1	1
Solyc01g016900	SL3.0ch01	22700036	22702036	+	2041	3192	2125	2842	39.002	42.782	3.77988	9.6844e-05	-5.12548e-15	-3.91086	1	1
Solyc01g016910	SL3.0ch01	22801939	22803939	+	2866	5870	3563	6749	32.807	34.552	1.7452	0.00686188	-5.12548e-15	-3.91086	1	1
Solyc01g016960	SL3.0ch01	23096455	23098455	-	1995	4522	1762	3076	30.612	36.42	5.80776	1.9987e-10	-5.12548e-15	-3.91086	1	1
Solyc01g016970	SL3.0ch01	23127325	23129325	+	7789	11375	10438	12672	40.644	45.167	4.52268	5.33731e-20	1.43572	1.1362	0.0104557	0.133516
Solyc01g016980	SL3.0ch01	23287111	23289111	-	1394	3245	1194	2561	30.05	31.798	1.74802	0.0437022	-5.12548e-15	-3.91086	1	1
Solyc01g016985	SL3.0ch01	23412280	23414280	+	962	2767	894	1948	25.798	31.457	5.65892	6.21579e-07	-5.12548e-15	-3.91086	1	1
Solyc01g017020	SL3.0ch01	23424085	23426085	-	796	1880	1045	2243	29.746	31.782	2.03635	0.0454682	-5.12548e-15	-3.91086	1	1
Solyc01g017030	SL3.0ch01	23464248	23466248	+	1453	3052	1932	3177	32.253	37.816	5.56257	2.01224e-08	-5.12548e-15	-3.91086	1	1
Solyc01g017040	SL3.0ch01	23705739	23707739	-	2015	3583	2869	4279	35.995	40.137	4.1421	2.16852e-06	-5.12548e-15	-3.91086	1	1
Solyc01g017050	SL3.0ch01	23707810	23709810	+	1182	4072	1300	3775	22.497	25.616	3.11862	0.000191416	-0.758403	-0.472182	0.51291	1
Solyc01g017120	SL3.0ch01	23797034	23799034	+	1974	6259	2656	7471	23.977	26.227	2.25024	0.000388836	-5.12548e-15	-3.91086	1	1
Solyc01g017150	SL3.0ch01	23800697	23802697	+	1042	3549	1415	4454	22.697	24.11	1.41315	0.0469494	-5.12548e-15	-3.91086	1	1
Solyc01g017170	SL3.0ch01	23805191	23807191	-	2901	5431	4580	7536	34.818	37.801	2.98368	1.44692e-05	-2.82355	-2.64802	0.1581	0.715044
Solyc01g017180	SL3.0ch01	23805879	23807879	-	2884	5061	4241	6808	36.3	38.384	2.084	0.00240189	-5.12548e-15	-3.91086	1	1
Solyc01g017190	SL3.0ch01	23806285	23808285	-	2356	5771	3351	7310	28.99	31.432	2.44254	0.000258283	-5.12548e-15	-3.91086	1	1
Solyc01g017183	SL3.0ch01	23806630	23808630	-	1799	7907	2662	10266	18.535	20.591	2.05604	0.000104463	-0.0642069	-1.98926	1	1
Solyc01g017200	SL3.0ch01	23805943	23807943	+	2779	4951	4063	6585	35.951	38.157	2.20656	0.00163317	-3.82247	-3.23557	0.0614097	0.426919
Solyc01g017220	SL3.0ch01	23812705	23814705	-	4563	57853	5163	62540	7.311	7.626	0.315329	0.0175131	0.170941	-0.0215383	0.842209	1
Solyc01g017230	SL3.0ch01	23810933	23812933	+	2558	77011	3530	92961	3.215	3.658	0.443552	5.15493e-07	-5.12548e-15	-3.91086	1	1
Solyc01g017250	SL3.0ch01	23815856	23817856	-	1349	3498	2045	4509	27.832	31.202	3.37067	8.80426e-05	-5.12548e-15	-3.91086	1	1
Solyc01g017260	SL3.0ch01	23815770	23817770	+	1360	3388	1887	4125	28.644	31.387	2.74359	0.00152614	-5.12548e-15	-3.83664	1	1
Solyc01g017280	SL3.0ch01	23820304	23822304	-	1656	4793	1851	4792	25.678	27.864	2.18552	0.0031557	-5.12548e-15	-3.91086	1	1
Solyc01g017300	SL3.0ch01	23851359	23853359	+	605	1479	355	617	29.031	36.523	7.49192	3.88333e-05	-2.0011	-3.2533	0.503519	1
Solyc01g017330	SL3.0ch01	23851705	23853705	+	642	1547	200	345	29.328	36.697	7.36879	0.000802025	-5.12548e-15	-3.72511	1	1
Solyc01g017530	SL3.0ch01	23884431	23886431	-	276	1009	750	1656	21.479	31.172	9.69347	4.85695e-10	-1.22518	-2.1897	0.355609	1
Solyc01g017560	SL3.0ch01	24023560	24025560	+	4124	4961	5659	6199	45.394	47.723	2.32955	0.000638413	-5.12548e-15	-3.72476	1	1
Solyc01g017563	SL3.0ch01	24034632	24036632	-	2384	4656	2388	4285	33.864	35.786	1.92237	0.0110015	-5.12548e-15	-3.91086	1	1
Solyc01g017600	SL3.0ch01	24249508	24251508	-	857	7010	1289	8485	10.894	13.188	2.29444	4.04429e-06	-7.96826	-1.78734	3.58615e-05	0.00180407
Solyc01g017620	SL3.0ch01	24362071	24364071	-	2262	5023	2801	4895	31.05	36.396	5.34543	1.16505e-11	-5.12548e-15	-3.91086	1	1
Solyc01g017650	SL3.0ch01	24628936	24630936	+	1439	3458	975	2139	29.385	31.31	1.92487	0.0351494	-5.12548e-15	-3.91086	1	1
Solyc01g017730	SL3.0ch01	24846709	24848709	-	1562	2898	2084	3032	35.022	40.735	5.71253	1.55489e-08	0.58553	-3.09097	0.848127	1
Solyc01g017740	SL3.0ch01	25042091	25044091	-	554	1538	631	1398	26.482	31.099	4.61723	0.000803988	4.64246	-3.03606	0.187254	0.777846
Solyc01g017750	SL3.0ch01	25256901	25258901	+	3018	6269	3428	6369	32.497	34.99	2.49326	0.000235089	-5.12548e-15	-3.91086	1	1
Solyc01g017775	SL3.0ch01	25304903	25306903	-	2268	7531	2066	6385	23.145	24.447	1.30159	0.0215551	-5.12548e-15	-3.91086	1	1
Solyc01g017797	SL3.0ch01	25461329	25463329	+	1454	4675	2111	5984	23.723	26.078	2.35454	0.000992743	-5.12548e-15	-3.91086	1	1
Solyc01g017820	SL3.0ch01	25465407	25467407	+	1453	4148	1555	3530	25.942	30.58	4.63834	1.47107e-07	-5.12548e-15	-3.91086	1	1
Solyc01g017823	SL3.0ch01	25528171	25530171	-	1097	2124	743	1129	34.058	39.69	5.63242	5.3311e-05	-5.12548e-15	-3.87283	1	1
Solyc01g017827	SL3.0ch01	25672030	25674030	+	3317	5031	3809	5037	39.734	43.059	3.32494	1.07046e-05	-5.12548e-15	-3.91086	1	1
Solyc01g017840	SL3.0ch01	25673524	25675524	+	2108	4361	2041	3675	32.586	35.707	3.12061	0.000242448	-5.12548e-15	-3.91086	1	1
Solyc01g017850	SL3.0ch01	25678136	25680136	+	1578	3159	3244	5372	33.312	37.651	4.33866	7.6961e-07	-5.12548e-15	-3.91086	1	1
Solyc01g017870	SL3.0ch01	25742308	25744308	-	1148	3877	1573	3626	22.846	30.256	7.41005	1.04538e-16	2.21817	-2.76573	0.317643	0.995046
Solyc01g017950	SL3.0ch01	26465973	26467973	+	877	1431	780	1106	37.998	41.357	3.3591	0.0160255	-5.12548e-15	-3.91086	1	1
Solyc01g017960	SL3.0ch01	26478847	26480847	+	1586	3523	2557	4727	31.043	35.104	4.06108	2.76606e-06	-5.12548e-15	-3.91086	1	1
Solyc01g017970	SL3.0ch01	26504175	26506175	+	2580	4717	3293	5172	35.357	38.901	3.54436	5.28277e-06	-5.12548e-15	-3.91086	1	1
Solyc01g018060	SL3.0ch01	27233643	27235643	-	2293	6482	3194	8226	26.131	27.968	1.83742	0.00248969	-2.01629	-3.86689	1	1
Solyc01g018090	SL3.0ch01	27320445	27322445	+	2391	7368	2924	7776	24.5	27.327	2.82664	4.81411e-06	-1.76782	-3.83451	1	1
Solyc01g019100	SL3.0ch01	27469556	27471556	-	1572	5196	1934	5778	23.227	25.078	1.85085	0.00603402	-5.12548e-15	-3.91086	1	1
Solyc01g020100	SL3.0ch01	27646713	27648713	+	1469	2576	2785	4024	36.316	40.902	4.58531	2.54858e-06	-5.12548e-15	-3.91086	1	1
Solyc01g020110	SL3.0ch01	27652361	27654361	-	1317	10793	2268	16124	10.875	12.331	1.45614	9.63928e-05	-5.12548e-15	-3.91086	1	1
Solyc01g020115	SL3.0ch01	27676144	27678144	+	2623	3947	3949	5509	39.924	41.753	1.82912	0.0123256	-1.3476	-2.85193	0.299358	0.968303
Solyc01g020120	SL3.0ch01	27713902	27715902	+	2055	6707	2906	8016	23.454	26.607	3.1533	5.2029e-07	3.21406	-3.62034	0.444767	1
Solyc01g020125	SL3.0ch01	27720339	27722339	+	179	494	407	833	26.597	32.823	6.22526	0.00331164	0.197767	-1.95811	0.94223	1
Solyc01g020155	SL3.0ch01	27726459	27728459	+	1537	3348	2157	4031	31.464	34.858	3.39412	0.00014869	-0.729406	-2.95306	0.740052	1
Solyc01g020160	SL3.0ch01	27726828	27728828	+	1725	3861	2310	4493	30.881	33.956	3.07483	0.000240815	1.8091	-3.87049	1	1
Solyc01g020180	SL3.0ch01	27763526	27765526	+	3534	5277	5011	6324	40.109	44.208	4.09925	9.12395e-09	-5.12548e-15	-3.91086	1	1
Solyc01g020200	SL3.0ch01	27787943	27789943	+	2891	22292	4345	28205	11.48	13.349	1.86873	3.58078e-11	-1.09579	-3.65206	0.78416	1
Solyc01g020220	SL3.0ch01	27847588	27849588	+	7795	8546	9960	10022	47.702	49.845	2.14276	4.58748e-05	-1.77755	-1.86979	0.0761122	0.484965
Solyc01g020230	SL3.0ch01	27847886	27849886	+	7816	9808	9926	10801	44.349	47.889	3.54061	1.07224e-11	-0.644447	-0.974255	0.531337	1
Solyc01g020280	SL3.0ch01	28539655	28541655	+	4600	12150	6353	14665	27.463	30.226	2.76379	7.14741e-09	-5.12548e-15	-3.91086	1	1
Solyc01g020285	SL3.0ch01	28564040	28566040	-	3547	10129	4110	10820	25.936	27.528	1.59252	0.00168614	-2.65929	0.663247	0.0160948	0.179843
Solyc01g020290	SL3.0ch01	28846840	28848840	+	3072	8108	3127	7323	27.478	29.923	2.44581	6.50806e-05	-5.12548e-15	-3.91086	1	1
Solyc01g020320	SL3.0ch01	29192745	29194745	-	10002	7842	12335	8686	56.052	58.679	2.62696	2.59968e-07	0.787432	3.02249	0.0731026	0.473528
Solyc01g020370	SL3.0ch01	29359631	29361631	-	3378	5182	4275	5792	39.463	42.465	3.00286	3.36666e-05	-5.12548e-15	-3.87428	1	1
Solyc01g020371	SL3.0ch01	29355809	29357809	+	4408	9713	5671	9655	31.216	37.002	5.78656	1.05435e-24	-3.3359	-3.51384	0.385125	1
Solyc01g020403	SL3.0ch01	30322462	30324462	+	1027	1494	1485	1803	40.738	45.164	4.42643	0.000583652	-5.12548e-15	-3.91086	1	1
Solyc01g020404	SL3.0ch01	30324691	30326691	+	425	6252	903	8142	6.365	9.983	3.61828	1.37209e-15	-5.12548e-15	-3.91086	1	1
Solyc01g020406	SL3.0ch01	30334409	30336409	+	905	3851	1250	3813	19.029	24.689	5.66032	3.14103e-11	-5.12548e-15	-3.91086	1	1
Solyc01g020408	SL3.0ch01	30367174	30369174	+	137	653	28	70	17.342	28.571	11.2297	0.00757474	-5.12548e-15	-3.91086	1	1
Solyc01g020440	SL3.0ch01	30774214	30776214	-	5369	6843	6942	8361	43.965	45.364	1.3987	0.0118613	-0.0460129	4.96768	0.897446	1
Solyc01g020445	SL3.0ch01	30776527	30778527	+	3503	4950	4431	5913	41.441	42.836	1.39552	0.0291786	-5.12548e-15	-3.91086	1	1
Solyc01g020480	SL3.0ch01	30904802	30906802	+	3687	8176	3782	7777	31.08	32.719	1.63927	0.00470573	-5.12548e-15	-3.91086	1	1
Solyc01g020490	SL3.0ch01	30906626	30908626	+	2213	4431	3059	5150	33.308	37.264	3.95573	7.30441e-07	-5.12548e-15	-3.91086	1	1
Solyc01g020500	SL3.0ch01	30954014	30956014	+	1620	5184	1961	5466	23.81	26.404	2.59414	0.000302406	-1.11411	0.963626	0.0260644	0.250653
Solyc01g020510	SL3.0ch01	31023653	31025653	-	2057	4832	3130	6283	29.859	33.252	3.39269	4.84114e-06	-5.12548e-15	-3.91086	1	1
Solyc01g020520	SL3.0ch01	31042626	31044626	+	5151	5792	6883	7042	47.071	49.429	2.3579	0.000194792	-5.12548e-15	-3.83217	1	1
Solyc01g020525	SL3.0ch01	31042626	31044626	+	5151	5792	6883	7042	47.071	49.429	2.3579	0.000194792	-0.344934	1.99668	0.491232	1
Solyc01g020570	SL3.0ch01	31665826	31667826	-	914	2635	1131	2857	25.754	28.36	2.60635	0.00721793	-5.12548e-15	-3.83726	1	1
Solyc01g021610	SL3.0ch01	32000533	32002533	-	2138	5371	2544	5745	28.472	30.691	2.21878	0.00168047	-5.12548e-15	-3.91086	1	1
Solyc01g021675	SL3.0ch01	32440879	32442879	+	3384	4848	3992	4857	41.108	45.112	4.00457	1.89275e-07	0.290062	5.34877	0.372558	1
Solyc01g021700	SL3.0ch01	32513522	32515522	+	1576	2931	2315	3589	34.968	39.211	4.24288	9.74703e-06	-5.12548e-15	-3.91086	1	1
Solyc01g021730	SL3.0ch01	32669884	32671884	-	5893	12032	7168	13507	32.876	34.67	1.79402	0.000175361	0.0450613	3.62844	0.928503	1
Solyc01g021740	SL3.0ch01	32690643	32692643	+	1949	6713	2157	6507	22.501	24.896	2.39554	0.000182772	0.106667	-2.79849	1	1
Solyc01g022740	SL3.0ch01	32752774	32754774	-	7310	7429	8538	7394	49.596	53.59	3.99395	7.07491e-12	-0.0852394	2.71506	0.837628	1
Solyc01g022760	SL3.0ch01	32847802	32849802	-	36228	38054	47958	44244	48.771	52.014	3.24316	2.88129e-38	-5.12548e-15	-3.91086	1	1
Solyc01g022780	SL3.0ch01	32866181	32868181	+	4022	3157	5754	4213	56.025	57.731	1.70599	0.0149755	2.62977	-3.68751	0.647145	1
Solyc01g033990	SL3.0ch01	35316300	35318300	+	3612	7132	4445	7365	33.619	37.638	4.01883	6.40171e-10	-5.12548e-15	-3.91086	1	1
Solyc01g034010	SL3.0ch01	35329743	35331743	-	3308	5559	3943	5743	37.307	40.708	3.40137	2.64341e-06	-5.12548e-15	-3.87428	1	1
Solyc01g034020	SL3.0ch01	35378752	35380752	-	6741	7587	8015	8456	47.048	48.661	1.61354	0.00313879	0.254891	6.56074	0.360441	1
Solyc01g034023	SL3.0ch01	35589799	35591799	+	734	2132	1074	2328	25.611	31.57	5.95906	3.02079e-07	-5.12548e-15	-3.91086	1	1
Solyc01g034050	SL3.0ch01	35597311	35599311	-	2911	4325	3656	4236	40.229	46.325	6.09598	1.29524e-13	-5.12548e-15	-3.83813	1	1
Solyc01g034070	SL3.0ch01	35750090	35752090	+	2741	8531	3281	9574	24.317	25.523	1.20625	0.0177259	-5.12548e-15	-3.91086	1	1
Solyc01g034063	SL3.0ch01	35750149	35752149	+	2718	8131	3262	9124	25.053	26.336	1.28319	0.0147767	-5.12548e-15	-3.91086	1	1
Solyc01g034080	SL3.0ch01	35862228	35864228	+	7264	6432	8391	7062	53.037	54.3	1.26275	0.0174673	-1.9694	-2.35015	0.378198	1
Solyc01g034085	SL3.0ch01	36122752	36124752	-	3028	3454	3772	3515	46.714	51.763	5.04944	6.0162e-09	-5.12548e-15	-3.91086	1	1
Solyc01g034140	SL3.0ch01	36197144	36199144	-	2757	5008	3583	5789	35.505	38.231	2.72543	0.000201948	-5.12548e-15	-3.91086	1	1
Solyc01g034170	SL3.0ch01	36431512	36433512	-	5959	6085	7015	6088	49.477	53.537	4.06044	2.68827e-10	-5.12548e-15	-3.91086	1	1
Solyc01g034190	SL3.0ch01	36600625	36602625	-	1621	4691	1567	3572	25.681	30.492	4.81107	1.90821e-08	-5.12548e-15	-3.91086	1	1
Solyc01g034210	SL3.0ch01	36636436	36638436	-	1058	2304	1364	2567	31.469	34.699	3.22919	0.00239665	-5.12548e-15	-3.91086	1	1
Solyc01g035220	SL3.0ch01	36787828	36789828	+	1461	5711	1818	5822	20.371	23.796	3.42492	6.97042e-07	-5.12548e-15	-3.91086	1	1
Solyc01g038235	SL3.0ch01	39002824	39004824	+	657	861	724	679	43.281	51.604	8.32307	7.73283e-06	-5.12548e-15	-3.91086	1	1
Solyc01g028980	SL3.0ch01	39013065	39015065	+	1776	3085	1687	2245	36.536	42.904	6.36868	2.50863e-09	-5.12548e-15	-3.91086	1	1
Solyc01g028987	SL3.0ch01	39618537	39620537	+	1816	4955	2270	4911	26.82	31.611	4.79093	9.83573e-10	-5.12548e-15	-3.91086	1	1
Solyc01g028910	SL3.0ch01	40262043	40264043	+	1648	4427	2055	4106	27.128	33.355	6.2274	1.92168e-13	-5.12548e-15	-3.91086	1	1
Solyc01g028900	SL3.0ch01	40715764	40717764	+	8498	8909	10847	10659	48.819	50.437	1.61765	0.00110318	0.0850882	7.43225	0.740287	1
Solyc01g028870	SL3.0ch01	40946144	40948144	-	3864	3521	5646	4557	52.322	55.337	3.01439	6.96773e-05	0.21193	5.27985	0.439192	1
Solyc01g028840	SL3.0ch01	41101706	41103706	-	1855	2480	2136	2565	42.791	45.437	2.64591	0.00711569	-5.12548e-15	-3.91086	1	1
Solyc01g028810	SL3.0ch01	41285356	41287356	+	10867	6012	13104	6710	64.382	66.135	1.75328	0.000357104	-0.0814448	9.4565	0.78926	1
Solyc01g028800	SL3.0ch01	41387254	41389254	+	589	3292	1161	4995	15.177	18.86	3.68315	2.33622e-06	1.7162	1.41596	0.0203823	0.212546
Solyc01g028805	SL3.0ch01	42409185	42411185	+	3585	9888	4346	11453	26.609	27.508	0.899297	0.0433865	0.349544	3.22533	0.561339	1
Solyc01g044240	SL3.0ch01	42435880	42437880	+	1465	7589	1696	7535	16.181	18.373	2.19218	8.2237e-05	-0.542861	6.9364	0.195903	0.795171
Solyc01g044277	SL3.0ch01	43059802	43061802	-	2795	3512	2781	2873	44.316	49.186	4.87058	1.44382e-07	-5.12548e-15	-3.91086	1	1
Solyc01g044305	SL3.0ch01	43150897	43152897	-	3724	3502	5254	4376	51.536	54.559	3.02255	9.17093e-05	-5.12548e-15	-3.91086	1	1
Solyc01g044360	SL3.0ch01	43194404	43196404	+	5375	11118	7758	13505	32.59	36.486	3.89633	1.0752e-14	0.0235186	8.00545	0.934534	1
Solyc01g044372	SL3.0ch01	43240464	43242464	-	6525	6650	9999	8086	49.526	55.289	5.7633	5.12288e-23	2.07208	-0.473421	0.0153577	0.174426
Solyc01g044373	SL3.0ch01	43791758	43793758	-	2156	3313	3097	3944	39.422	43.985	4.56303	3.8594e-07	3.42633	-3.58993	0.341026	1
Solyc01g044374	SL3.0ch01	43792237	43794237	-	2084	3225	2682	3398	39.254	44.112	4.85775	2.26575e-07	-5.12548e-15	-3.91086	1	1
Solyc01g044490	SL3.0ch01	44022735	44024735	+	4566	6407	7767	7890	41.611	49.607	7.99598	8.68912e-37	-5.12548e-15	-3.91086	1	1
Solyc01g044480	SL3.0ch01	44022735	44024735	+	4566	6407	7767	7890	41.611	49.607	7.99598	8.68912e-37	-0.701447	-1.63033	0.527996	1
Solyc01g044510	SL3.0ch01	44076938	44078938	-	3079	8306	3656	7772	27.044	31.992	4.94724	1.02081e-15	-5.12548e-15	-3.91086	1	1
Solyc01g044543	SL3.0ch01	44389260	44391260	+	3414	4712	3735	3677	42.013	50.391	8.37797	1.07021e-24	-5.12548e-15	-3.91086	1	1
Solyc01g044550	SL3.0ch01	44574908	44576908	+	2494	5002	2983	5143	33.271	36.709	3.43825	7.44582e-06	-5.12548e-15	-3.91086	1	1
Solyc01g044560	SL3.0ch01	44584758	44586758	+	3296	4028	4392	5076	45.003	46.388	1.3851	0.0382518	-5.12548e-15	-3.91086	1	1
Solyc01g047580	SL3.0ch01	44777994	44779994	-	3373	8340	4790	9566	28.797	33.366	4.56878	8.22966e-15	-5.12548e-15	-3.91086	1	1
Solyc01g047590	SL3.0ch01	44888424	44890424	-	5857	13640	6724	12827	30.041	34.392	4.35158	2.00958e-19	-0.246207	-3.19005	1	1
Solyc01g047593	SL3.0ch01	44890108	44892108	-	3192	8453	4445	9250	27.411	32.457	5.0462	1.22309e-17	-5.12548e-15	-3.83511	1	1
Solyc01g047597	SL3.0ch01	44915733	44917733	-	401	1640	557	1790	19.647	23.732	4.08519	0.000826682	-5.12548e-15	-3.68652	1	1
Solyc01g048590	SL3.0ch01	44910788	44912788	+	2257	4037	3203	4590	35.86	41.101	5.24144	4.41837e-10	-1.90767	0.31431	0.0756006	0.483025
Solyc01g049640	SL3.0ch01	45559933	45561933	+	2105	3610	2249	3597	36.833	38.471	1.63785	0.0364784	-5.12548e-15	-3.91086	1	1
Solyc01g049660	SL3.0ch01	45735107	45737107	-	2239	5622	2512	5277	28.482	32.251	3.76823	4.24602e-07	-5.12548e-15	-3.91086	1	1
Solyc01g049680	SL3.0ch01	45778817	45780817	-	36	316	18	52	10.227	25.714	15.487	0.000930671	0.0615487	6.44366	0.815857	1
Solyc01g049685	SL3.0ch01	45792778	45794778	-	3721	8134	4583	8502	31.388	35.025	3.63724	2.21351e-09	-5.12548e-15	-3.82789	1	1
Solyc01g049690	SL3.0ch01	45793026	45795026	-	4401	9006	5091	8692	32.826	36.937	4.11067	3.25282e-12	-0.211113	3.20886	0.573738	1
Solyc01g049720	SL3.0ch01	46034061	46036061	-	2262	6176	2813	5930	26.807	32.174	5.36701	3.99577e-14	-5.12548e-15	-3.91086	1	1
Solyc01g049740	SL3.0ch01	46184034	46186034	-	1482	2382	1383	1904	38.354	42.075	3.7208	0.00101931	-5.12548e-15	-3.91086	1	1
Solyc01g049743	SL3.0ch01	46270223	46272223	-	2263	7926	2585	7747	22.21	25.019	2.80913	2.59537e-06	-5.12548e-15	-3.91086	1	1
Solyc01g049760	SL3.0ch01	46268728	46270728	+	1924	3221	2366	3626	37.396	39.486	2.09045	0.0140991	-5.12548e-15	-3.91086	1	1
Solyc01g049765	SL3.0ch01	46270317	46272317	+	2161	7965	2465	7846	21.341	23.907	2.56541	1.24042e-05	-5.12548e-15	-3.91086	1	1
Solyc01g049770	SL3.0ch01	46288758	46290758	+	76	4467	114	5032	1.673	2.215	0.542409	0.0296383	-0.115523	1.7791	0.821997	1
Solyc01g049775	SL3.0ch01	46460325	46462325	-	1100	6263	1678	7753	14.94	17.792	2.85282	9.79308e-07	-5.12548e-15	-3.91086	1	1
Solyc01g049790	SL3.0ch01	46460634	46462634	-	1357	7286	2066	9120	15.701	18.47	2.76895	4.12994e-07	-5.12548e-15	-3.91086	1	1
Solyc01g049793	SL3.0ch01	46461178	46463178	-	1789	10114	2137	10799	15.03	16.52	1.48997	0.000993758	-5.12548e-15	-3.91086	1	1
Solyc01g049810	SL3.0ch01	46560189	46562189	+	3781	6693	5478	7791	36.099	41.284	5.18528	1.55431e-15	1.23216	-0.407219	0.0957295	0.54741
Solyc01g049845	SL3.0ch01	46595576	46597576	+	4468	9432	4939	9377	32.144	34.5	2.35598	2.70504e-05	-5.12548e-15	-3.91086	1	1
Solyc01g049890	SL3.0ch01	46758404	46760404	-	8833	8634	10950	9717	50.57	52.983	2.41337	3.17209e-06	0.29603	8.8408	0.244148	0.879537
Solyc01g049895	SL3.0ch01	46780721	46782721	-	1300	2360	1523	2294	35.519	39.9	4.38132	8.95818e-05	-5.12548e-15	-3.91086	1	1
Solyc01g049910	SL3.0ch01	47073063	47075063	-	6861	5958	9854	7692	53.522	56.161	2.63883	5.80722e-06	-0.722113	2.47958	0.123584	0.629055
Solyc01g049912	SL3.0ch01	47060474	47062474	-	806	1645	921	1692	32.885	35.247	2.36231	0.0405712	-3.3183	-1.94008	0.141556	0.675092
Solyc01g049914	SL3.0ch01	47073063	47075063	-	6861	5958	9854	7692	53.522	56.161	2.63883	5.80722e-06	-5.12548e-15	-3.91086	1	1
Solyc01g049920	SL3.0ch01	47262157	47264157	+	3082	7259	4156	9293	29.804	30.902	1.09823	0.0354224	1.7432	0.0650672	0.143088	0.679379
Solyc01g049950	SL3.0ch01	47603836	47605836	+	1701	5448	2522	6293	23.794	28.61	4.81679	1.4901e-11	-5.12548e-15	-3.91086	1	1
Solyc01g049960	SL3.0ch01	47627525	47629525	-	4192	9052	10871	10806	31.652	50.15	18.4979	6.66845e-253	0.00236211	5.45723	0.994357	1
Solyc01g049975	SL3.0ch01	47691030	47693030	+	11867	5643	14338	6364	67.773	69.259	1.48631	0.00134615	0.0883916	1.8142	0.883788	1
Solyc01g050010	SL3.0ch01	47692652	47694652	+	3644	3224	3967	3059	53.058	56.462	3.40405	5.33271e-05	0.263591	3.0274	0.506	1
Solyc01g050020	SL3.0ch01	47952218	47954218	+	361	2581	709	3488	12.271	16.893	4.62245	9.82537e-08	-5.12548e-15	-3.70139	1	1
Solyc01g050040	SL3.0ch01	48062102	48064102	-	2579	11571	2535	9856	18.226	20.458	2.23225	5.05098e-06	-0.282388	4.41978	0.328203	1
Solyc01g050070	SL3.0ch01	48300595	48302595	-	4709	6446	5554	6907	42.214	44.571	2.35681	0.00022454	0.224645	3.33252	0.531697	1
Solyc01g050050	SL3.0ch01	48281490	48283490	+	1068	3987	1098	3672	21.128	23.019	1.89127	0.0142963	-5.12548e-15	-3.91086	1	1
Solyc01g055160	SL3.0ch01	50873177	50875177	+	1785	5631	2400	6803	24.07	26.078	2.00887	0.00207422	-5.12548e-15	-3.91086	1	1
Solyc01g055200	SL3.0ch01	51678423	51680423	-	1789	7019	2217	7401	20.311	23.051	2.73945	7.1919e-06	-5.12548e-15	-3.91086	1	1
Solyc01g056200	SL3.0ch01	52411753	52413753	-	1141	2669	2223	3627	29.948	38	8.05249	1.55581e-15	-5.12548e-15	-3.91086	1	1
Solyc01g056230	SL3.0ch01	52597915	52599915	-	1747	3924	2207	3425	30.806	39.187	8.38094	5.6384e-20	-5.12548e-15	-3.91086	1	1
Solyc01g056250	SL3.0ch01	52679581	52681581	-	1053	6071	1389	6666	14.781	17.244	2.46293	3.67247e-05	-5.12548e-15	-3.91086	1	1
Solyc01g056270	SL3.0ch01	52752386	52754386	-	6299	5219	8123	6331	54.688	56.199	1.51066	0.00911205	-5.12548e-15	-1.81131	1	1
Solyc01g056280	SL3.0ch01	52759274	52761274	-	1834	8848	2661	10448	17.169	20.299	3.12996	1.51526e-09	-5.12548e-15	-3.91086	1	1
Solyc01g056310	SL3.0ch01	53284166	53286166	+	1646	6925	2436	8677	19.204	21.92	2.71598	3.57276e-06	-5.12548e-15	-3.91086	1	1
Solyc01g056340	SL3.0ch01	53583870	53585870	+	5204	7655	6899	8950	40.47	43.53	3.05985	2.51545e-07	0.214453	3.81561	0.514474	1
Solyc01g056370	SL3.0ch01	53873236	53875236	-	2509	5862	3161	6900	29.973	31.418	1.44582	0.019014	-5.12548e-15	-3.91086	1	1
Solyc01g056375	SL3.0ch01	53873195	53875195	-	2417	5700	3073	6815	29.777	31.078	1.30106	0.0309169	-5.12548e-15	-3.91086	1	1
Solyc01g056380	SL3.0ch01	54068733	54070733	+	1237	4046	1794	5203	23.415	25.64	2.22483	0.003068	-5.12548e-15	-3.91086	1	1
Solyc01g056390	SL3.0ch01	54078030	54080030	+	1873	3716	2205	3817	33.512	36.616	3.10349	0.000392771	-5.12548e-15	-3.91086	1	1
Solyc01g056400	SL3.0ch01	54079769	54081769	+	1504	3603	1986	4045	29.45	32.93	3.48009	7.49774e-05	-5.12548e-15	-3.91086	1	1
Solyc01g056410	SL3.0ch01	54085683	54087683	+	330	684	403	660	32.544	37.912	5.36719	0.00704487	-5.12548e-15	-3.91086	1	1
Solyc01g056430	SL3.0ch01	54141193	54143193	+	2462	6620	3129	7405	27.109	29.704	2.59525	5.55692e-05	-5.12548e-15	-3.91086	1	1
Solyc01g056440	SL3.0ch01	54149310	54151310	+	692	1625	1149	1893	29.866	37.771	7.905	2.77418e-09	-5.12548e-15	-3.91086	1	1
Solyc01g056455	SL3.0ch01	54290285	54292285	-	1132	2049	1598	2505	35.586	38.947	3.36082	0.00231974	-5.12548e-15	-3.91086	1	1
Solyc01g056470	SL3.0ch01	54305231	54307231	+	942	2684	1233	2484	25.979	33.172	7.19287	3.39827e-11	-5.12548e-15	-3.87428	1	1
Solyc01g056480	SL3.0ch01	54395531	54397531	-	8834	8166	9964	8397	51.965	54.267	2.30249	1.5335e-05	1.02886	0.564825	0.113507	0.601383
Solyc01g056485	SL3.0ch01	54496164	54498164	+	3202	8412	4131	8349	27.57	33.101	5.53079	6.47696e-20	-5.12548e-15	-3.87151	1	1
Solyc01g056570	SL3.0ch01	54707574	54709574	-	4094	5319	4719	5350	43.493	46.867	3.37358	2.71123e-06	-0.120746	5.69302	0.670729	1
Solyc01g056580	SL3.0ch01	54883560	54885560	+	4475	9953	5218	10672	31.016	32.838	1.82218	0.000538023	-1.4713	-2.65052	0.27353	0.930843
Solyc01g056590	SL3.0ch01	54891273	54893273	-	2887	8777	3541	9498	24.751	27.157	2.40562	1.74514e-05	-5.12548e-15	-3.62779	1	1
Solyc01g056620	SL3.0ch01	54995541	54997541	+	4827	5780	5848	5840	45.508	50.034	4.52654	3.40197e-11	-0.400351	1.18992	0.489898	1
Solyc01g056640	SL3.0ch01	55134034	55136034	+	2441	3576	3738	4595	40.568	44.858	4.2894	4.32476e-07	-5.12548e-15	-3.91086	1	1
Solyc01g056650	SL3.0ch01	55344776	55346776	+	1836	4346	2607	5197	29.699	33.406	3.70682	3.57149e-06	-5.12548e-15	-3.91086	1	1
Solyc01g056655	SL3.0ch01	55351819	55353819	+	1044	5107	1470	5987	16.973	19.713	2.74017	3.85706e-05	-5.12548e-15	-3.91086	1	1
Solyc01g056690	SL3.0ch01	55929996	55931996	-	6367	7476	8548	9363	45.994	47.725	1.7305	0.00155317	-0.255196	4.36998	0.372508	1
Solyc01g056720	SL3.0ch01	56283964	56285964	-	11358	10441	13920	12059	52.103	53.582	1.47843	0.000942048	0.444446	4.2251	0.1665	0.733329
Solyc01g056725	SL3.0ch01	56287682	56289682	-	1407	3042	1644	2613	31.625	38.619	6.99366	1.98373e-11	-0.387934	-0.840698	0.726393	1
Solyc01g056750	SL3.0ch01	56454340	56456340	+	3247	4810	3814	5084	40.3	42.864	2.5632	0.000578335	2.59149	-2.78697	0.576646	1
Solyc01g056760	SL3.0ch01	56462246	56464246	+	470	1721	1100	3053	21.451	26.487	5.03548	9.65876e-06	-4.24649	-2.73817	0.050292	0.378624
Solyc01g056780	SL3.0ch01	56534091	56536091	+	1307	1862	2500	3146	41.243	44.279	3.03584	0.00380539	0.606471	3.92494	0.100298	0.562736
Solyc01g056810	SL3.0ch01	56761982	56763982	-	7423	9650	9345	10936	43.478	46.078	2.5996	6.28171e-07	0.297683	3.3289	0.433192	1
Solyc01g056830	SL3.0ch01	56762394	56764394	-	8243	8906	10130	9868	48.067	50.655	2.58812	8.72137e-07	1.43089	-2.43764	0.453898	1
Solyc01g056840	SL3.0ch01	56853487	56855487	+	891	1780	792	1237	33.358	39.034	5.67571	5.97753e-05	-5.12548e-15	-3.91086	1	1
Solyc01g056870	SL3.0ch01	57345894	57347894	-	863	1713	1268	2180	33.502	36.775	3.27339	0.00558937	-5.12548e-15	-3.91086	1	1
Solyc01g056875	SL3.0ch01	57379524	57381524	-	3137	5448	3417	4866	36.54	41.253	4.71269	7.04095e-10	-5.12548e-15	-3.70088	1	1
Solyc01g056880	SL3.0ch01	57370151	57372151	+	3192	7499	3303	6201	29.857	34.754	4.8969	3.27181e-13	-5.12548e-15	-3.91086	1	1
Solyc01g056883	SL3.0ch01	57384016	57386016	-	5477	11832	7243	13586	31.642	34.774	3.13113	2.24389e-10	-5.12548e-15	-3.91086	1	1
Solyc01g056885	SL3.0ch01	57389304	57391304	-	2235	3947	2198	3239	36.153	40.427	4.27336	2.67422e-06	-5.12548e-15	-3.91086	1	1
Solyc01g056887	SL3.0ch01	57391115	57393115	-	2855	3613	2766	3198	44.14	46.378	2.23789	0.0077637	-5.12548e-15	-3.91086	1	1
Solyc01g056890	SL3.0ch01	57389083	57391083	+	2355	4370	2377	3618	35.019	39.65	4.63112	1.05414e-07	-5.12548e-15	-3.40786	1	1
Solyc01g056915	SL3.0ch01	57493467	57495467	-	939	1865	1749	2867	33.488	37.89	4.40207	0.000120571	-5.12548e-15	-3.91086	1	1
Solyc01g056930	SL3.0ch01	57484268	57486268	+	1659	4293	2482	5337	27.873	31.743	3.87021	1.21194e-06	-5.12548e-15	-3.91086	1	1
Solyc01g056940	SL3.0ch01	57594504	57596504	+	2257	2647	2934	3040	46.024	49.113	3.08917	0.000998642	0.237446	8.45293	0.512356	1
Solyc01g056950	SL3.0ch01	57635808	57637808	-	1893	5651	2001	5008	25.093	28.549	3.45622	2.9831e-06	-5.12548e-15	-3.91086	1	1
Solyc01g056970	SL3.0ch01	57848317	57850317	-	4059	6543	5645	6997	38.285	44.653	6.36752	7.17668e-22	-5.12548e-15	-3.91086	1	1
Solyc01g056990	SL3.0ch01	57858291	57860291	+	9278	7942	10282	7581	53.879	57.56	3.68111	1.01081e-11	-0.442835	0.11936	0.712482	1
Solyc01g057000	SL3.0ch01	57888469	57890469	+	5955	7507	8160	7690	44.236	51.483	7.24702	5.02861e-34	0.475442	9.64771	0.208624	0.817271
Solyc01g057020	SL3.0ch01	57938980	57940980	+	8644	10625	10923	11125	44.86	49.542	4.68229	1.1364e-20	-0.259917	2.68944	0.543133	1
Solyc01g057030	SL3.0ch01	57950214	57952214	-	2951	3986	3581	4478	42.54	44.435	1.89479	0.011564	-2.18574	-2.71197	0.465396	1
Solyc01g057040	SL3.0ch01	57950179	57952179	+	2982	4055	3581	4478	42.376	44.435	2.05878	0.00690731	-0.309455	3.94012	0.320545	0.996913
Solyc01g057060	SL3.0ch01	58086261	58088261	+	808	2042	998	1892	28.351	34.533	6.18199	6.26175e-07	-5.12548e-15	-3.91086	1	1
Solyc01g057070	SL3.0ch01	58091619	58093619	+	2601	5635	3591	6422	31.581	35.863	4.28251	2.22484e-09	-5.12548e-15	-3.91086	1	1
Solyc01g057090	SL3.0ch01	58361564	58363564	-	9871	8482	12705	10310	53.784	55.203	1.41901	0.00273232	-0.574852	4.99989	0.0399467	0.327334
Solyc01g057100	SL3.0ch01	58370192	58372192	-	3054	10080	3878	10841	23.253	26.347	3.09427	4.58144e-09	-5.12548e-15	-3.91086	1	1
Solyc01g057110	SL3.0ch01	58759625	58761625	+	2126	5569	2499	5409	27.628	31.601	3.97258	8.81266e-08	-5.12548e-15	-3.91086	1	1
Solyc01g057130	SL3.0ch01	59051428	59053428	+	3384	4738	3328	4329	41.665	43.463	1.79888	0.0132671	-5.12548e-15	-3.91086	1	1
Solyc01g057140	SL3.0ch01	59294384	59296384	+	1105	2834	1365	3142	28.053	30.286	2.23342	0.0146313	-5.12548e-15	-3.91086	1	1
Solyc01g057170	SL3.0ch01	59420332	59422332	+	9288	10478	11378	12241	46.99	48.173	1.1833	0.00854454	1.84199	-0.931163	0.0627238	0.432795
Solyc01g057190	SL3.0ch01	59684761	59686761	-	411	6012	548	5818	6.399	8.608	2.20935	2.52069e-06	-5.12548e-15	-3.91086	1	1
Solyc01g057210	SL3.0ch01	59816210	59818210	+	7888	7305	10850	9336	51.919	53.75	1.83148	0.000502387	0.322258	5.45282	0.245209	0.881297
Solyc01g057220	SL3.0ch01	59831624	59833624	+	2495	4520	3121	5324	35.567	36.957	1.39014	0.0382561	-5.12548e-15	-3.91086	1	1
Solyc01g057270	SL3.0ch01	60269134	60271134	+	8380	5225	8957	5350	61.595	62.606	1.01072	0.0423232	-1.98002	-1.59774	0.0861022	0.516729
Solyc01g057280	SL3.0ch01	60315327	60317327	-	1706	2689	2296	2724	38.817	45.737	6.92021	2.98927e-11	-1.00822	-0.140308	0.245259	0.881384
Solyc01g057300	SL3.0ch01	60437667	60439667	-	3444	11198	4118	10326	23.521	28.51	4.98873	1.99461e-21	-5.12548e-15	-2.69959	1	1
Solyc01g057370	SL3.0ch01	60767831	60769831	-	3224	7409	4159	7135	30.321	36.825	6.50416	1.74452e-23	-5.12548e-15	-3.91086	1	1
Solyc01g057390	SL3.0ch01	60813726	60815726	-	2724	8436	3889	10361	24.409	27.291	2.88263	2.71893e-07	-5.12548e-15	-3.91086	1	1
Solyc01g057400	SL3.0ch01	60851614	60853614	-	1630	4340	1436	3536	27.303	28.882	1.57856	0.0355894	-5.12548e-15	-3.91086	1	1
Solyc01g057410	SL3.0ch01	60857504	60859504	-	334	5426	507	6125	5.799	7.645	1.84614	4.18582e-05	-5.12548e-15	-3.91086	1	1
Solyc01g057430	SL3.0ch01	60891338	60893338	-	10159	5277	13147	6216	65.814	67.898	2.08385	4.01579e-05	-0.478312	0.734778	0.465905	1
Solyc01g057465	SL3.0ch01	61007314	61009314	+	1678	3374	2678	4442	33.215	37.612	4.39779	7.75116e-07	-5.12548e-15	-3.87428	1	1
Solyc01g057477	SL3.0ch01	61044362	61046362	+	3702	6053	4788	6632	37.95	41.926	3.97668	7.07552e-09	0.109283	1.17835	0.837084	1
Solyc01g057510	SL3.0ch01	61227445	61229445	+	9374	8565	12361	9852	52.255	55.648	3.39273	2.85152e-11	1.80911	-3.87049	1	1
Solyc01g057520	SL3.0ch01	61249164	61251164	+	6975	9005	8346	9985	43.648	45.529	1.88112	0.000377859	0.613121	4.9295	0.0824933	0.506155
Solyc01g057525	SL3.0ch01	61323327	61325327	-	1122	4265	1248	3967	20.828	23.931	3.10305	0.000114886	-5.12548e-15	-3.91086	1	1
Solyc01g057530	SL3.0ch01	61414708	61416708	-	1939	6402	2673	7846	23.247	25.411	2.16455	0.000472747	-5.12548e-15	-3.91086	1	1
Solyc01g057560	SL3.0ch01	61689831	61691831	-	480	1756	322	819	21.467	28.221	6.75395	1.59586e-05	-5.12548e-15	-3.82946	1	1
Solyc01g057580	SL3.0ch01	61939014	61941014	+	556	1146	1060	1821	32.667	36.793	4.12533	0.00321615	-2.8282	-3.49907	0.689034	1
Solyc01g057600	SL3.0ch01	62807521	62809521	-	1493	13209	1998	15774	10.155	11.242	1.08732	0.00118039	-5.12548e-15	-2.88144	1	1
Solyc01g057650	SL3.0ch01	63386743	63388743	+	501	1306	1268	2656	27.726	32.314	4.58845	0.000398721	-5.12548e-15	-3.91086	1	1
Solyc01g057670	SL3.0ch01	63387834	63389834	+	1593	3027	2019	3523	34.481	36.431	1.95037	0.0224488	-5.12548e-15	-3.91086	1	1
Solyc01g057685	SL3.0ch01	63470124	63472124	-	1516	3382	1522	2909	30.951	34.349	3.3975	0.000376887	-0.384017	-2.36124	0.722033	1
Solyc01g057700	SL3.0ch01	63475636	63477636	-	2740	3953	2463	3241	40.938	43.18	2.24193	0.00718569	3.50246	-3.75208	0.399747	1
Solyc01g057710	SL3.0ch01	63478723	63480723	-	2573	4114	3278	4365	38.478	42.889	4.41127	1.26819e-07	-5.12548e-15	-3.91086	1	1
Solyc01g057720	SL3.0ch01	63482322	63484322	-	1426	2987	1899	3305	32.314	36.491	4.17754	1.87485e-05	-3.70703	-3.34949	0.201529	0.80493
Solyc01g057740	SL3.0ch01	63547059	63549059	-	4897	7390	4652	6191	39.855	42.903	3.04812	3.07764e-06	-5.12548e-15	-3.87098	1	1
Solyc01g057743	SL3.0ch01	63555356	63557356	-	2210	4707	2656	4637	31.95	36.418	4.46822	3.22598e-08	-5.12548e-15	-3.91086	1	1
Solyc01g057745	SL3.0ch01	63555805	63557805	-	2453	5586	3253	6124	30.514	34.691	4.17752	8.51866e-09	-5.12548e-15	-3.91086	1	1
Solyc01g057747	SL3.0ch01	63557203	63559203	-	3509	5900	3096	4753	37.294	39.445	2.15044	0.00257038	-5.12548e-15	-3.91086	1	1
Solyc01g057750	SL3.0ch01	63581600	63583600	+	1738	4101	1650	3457	29.765	32.309	2.54323	0.00283163	-5.12548e-15	-3.91086	1	1
Solyc01g057800	SL3.0ch01	63899935	63901935	-	1743	4116	2202	4283	29.749	33.955	4.20618	7.15121e-07	-5.12548e-15	-3.91086	1	1
Solyc01g057820	SL3.0ch01	63977636	63979636	-	1767	4619	3007	6753	27.67	30.809	3.13952	1.98071e-05	-5.12548e-15	-3.91086	1	1
Solyc01g057830	SL3.0ch01	64028386	64030386	+	1622	3142	2667	4245	34.047	38.585	4.53805	7.34054e-07	0.247324	6.48182	0.509133	1
Solyc01g057854	SL3.0ch01	64112931	64114931	+	3446	7878	4254	8340	30.431	33.778	3.34705	4.87557e-08	-5.12548e-15	-3.91086	1	1
Solyc01g057856	SL3.0ch01	64115464	64117464	+	3990	7066	4930	7471	36.089	39.755	3.66586	1.33406e-08	-5.12548e-15	-3.91086	1	1
Solyc01g058010	SL3.0ch01	64951101	64953101	+	5108	7950	4380	6009	39.118	42.16	3.04219	3.01661e-06	0.694759	3.25861	0.0851005	0.513266
Solyc01g058050	SL3.0ch01	64988291	64990291	-	1236	2316	1042	1566	34.797	39.954	5.15669	3.7272e-05	-5.12548e-15	-3.91086	1	1
Solyc01g058100	SL3.0ch01	65142388	65144388	-	1648	9107	2063	8962	15.323	18.712	3.38891	6.42818e-11	1.81499	-3.08316	1	1
Solyc01g058130	SL3.0ch01	65259536	65261536	-	1977	7342	2484	8626	21.215	22.358	1.14351	0.0268524	-5.12548e-15	-3.91086	1	1
Solyc01g058190	SL3.0ch01	65516969	65518969	+	820	1803	1770	2708	31.262	39.527	8.26466	6.33844e-12	0.0433986	4.20466	0.899602	1
Solyc01g058210	SL3.0ch01	65559641	65561641	-	1404	4101	1987	5295	25.504	27.286	1.78237	0.0141063	-8.15285	-1.41099	7.90556e-09	1.99131e-06
Solyc01g058220	SL3.0ch01	65597632	65599632	-	363	1799	951	3152	16.79	23.178	6.38815	4.75236e-09	-4.25701	-3.42015	0.167465	0.735614
Solyc01g058230	SL3.0ch01	65702559	65704559	-	6795	4320	8644	4833	61.134	64.139	3.0053	1.60048e-06	0.123561	-0.553606	0.903681	1
Solyc01g058240	SL3.0ch01	65702714	65704714	+	6803	4476	8651	5012	60.316	63.317	3.00136	1.52374e-06	-1.97672	-2.00696	0.140963	0.673517
Solyc01g058250	SL3.0ch01	65847354	65849354	+	7495	8614	8331	7765	46.527	51.758	5.23141	3.56694e-20	4.04214	-3.67847	0.286884	0.951181
Solyc01g058270	SL3.0ch01	65874603	65876603	+	4163	7370	4315	6859	36.096	38.616	2.52001	7.85543e-05	1.45601	3.17929	0.00810366	0.110042
Solyc01g058280	SL3.0ch01	65887053	65889053	-	8416	6559	9611	5959	56.2	61.728	5.52735	6.64107e-22	0.242364	4.99427	0.407211	1
Solyc01g058320	SL3.0ch01	66027263	66029263	+	12216	8948	15045	8952	57.721	62.695	4.97468	4.06443e-26	3.08948	6.05597	9.3753e-08	1.51052e-05
Solyc01g058327	SL3.0ch01	66260684	66262684	+	3369	4628	3969	4116	42.128	49.091	6.96261	4.10096e-18	-5.12548e-15	-3.91086	1	1
Solyc01g058350	SL3.0ch01	66286085	66288085	-	2130	6291	2444	6533	25.294	27.225	1.93122	0.00268784	1.12332	-0.344541	0.169964	0.741664
Solyc01g058363	SL3.0ch01	66333528	66335528	+	2506	3981	3141	3897	38.631	44.629	5.99805	4.06443e-12	-5.12548e-15	-3.91086	1	1
Solyc01g058370	SL3.0ch01	66334780	66336780	+	2243	3699	2712	4037	37.748	40.184	2.4355	0.00346108	-5.12548e-15	-3.91086	1	1
Solyc01g058367	SL3.0ch01	66335497	66337497	+	2070	3419	2790	4208	37.712	39.869	2.15675	0.00877411	-5.12548e-15	-3.91086	1	1
Solyc01g058410	SL3.0ch01	66431468	66433468	-	1886	2329	2206	2467	44.745	47.207	2.4624	0.0117378	-5.12548e-15	-3.83362	1	1
Solyc01g058450	SL3.0ch01	66481052	66483052	+	3923	6581	5445	7695	37.348	41.438	4.09068	3.58004e-10	-0.481026	5.02818	0.0761181	0.484965
Solyc01g058480	SL3.0ch01	66715559	66717559	+	2294	2419	3362	3265	48.674	50.732	2.05797	0.0174819	-5.12548e-15	-3.91086	1	1
Solyc01g058500	SL3.0ch01	66782775	66784775	-	309029	205370	301509	110746	60.076	73.137	13.0608	0	0.579167	6.20693	0.328404	1
Solyc01g058510	SL3.0ch01	66785932	66787932	-	2081	4198	1858	2852	33.142	39.448	6.30576	2.54272e-11	-5.12548e-15	-3.87428	1	1
Solyc01g058520	SL3.0ch01	66807341	66809341	-	20	344	36	146	5.495	19.78	14.2857	9.11754e-07	0.407943	-0.480366	0.59965	1
Solyc01g058540	SL3.0ch01	66818890	66820890	-	6791	8977	8816	10503	43.068	45.634	2.56559	1.8634e-06	-0.872753	-2.00848	0.67513	1
Solyc01g058550	SL3.0ch01	66945853	66947853	-	2864	6264	3923	7291	31.376	34.983	3.60707	8.43292e-08	-5.12548e-15	-3.91086	1	1
Solyc01g058590	SL3.0ch01	67085249	67087249	-	3791	7521	4752	8549	33.513	35.727	2.21355	0.000236525	-5.12548e-15	-3.87151	1	1
Solyc01g058595	SL3.0ch01	67144679	67146679	-	2780	7193	3897	8478	27.875	31.491	3.61565	7.64039e-09	5.49389	-2.40495	0.00190718	0.0390251
Solyc01g058650	SL3.0ch01	67338542	67340542	-	3130	4143	3595	4236	43.036	45.907	2.87141	0.000323418	-5.12548e-15	-3.87171	1	1
Solyc01g058660	SL3.0ch01	67346478	67348478	-	7368	7979	9263	8327	48.009	52.661	4.65122	1.60854e-16	-5.12548e-15	-3.8387	1	1
Solyc01g058670	SL3.0ch01	67463037	67465037	-	6892	4983	9159	6050	58.038	60.221	2.18303	0.000237338	0.425764	6.86895	0.183022	0.770337
Solyc01g058675	SL3.0ch01	67538477	67540477	-	5029	7672	5607	8201	39.595	40.607	1.01159	0.0474094	-5.12548e-15	-3.87171	1	1
Solyc01g058680	SL3.0ch01	67566799	67568799	-	1462	2789	1647	2555	34.392	39.196	4.80371	5.22349e-06	-5.12548e-15	-3.91086	1	1
Solyc01g058690	SL3.0ch01	67638295	67640295	-	1918	4056	2622	5105	32.106	33.933	1.82717	0.0139358	-5.12548e-15	-3.91086	1	1
Solyc01g058730	SL3.0ch01	67948782	67950782	-	7535	14975	9957	18949	33.474	34.446	0.972124	0.0121615	0.0838493	6.24769	0.738918	1
Solyc01g058733	SL3.0ch01	67938864	67940864	+	4597	5567	6244	5546	45.228	52.96	7.73188	3.41773e-29	1.11018	-3.03985	0.499629	1
Solyc01g059740	SL3.0ch01	68211334	68213334	-	2740	7723	2797	7107	26.188	28.241	2.0536	0.000783862	-5.12548e-15	-3.91086	1	1
Solyc01g059750	SL3.0ch01	68250137	68252137	-	2239	5332	2225	4934	29.573	31.08	1.50639	0.0258672	-5.12548e-15	-3.91086	1	1
Solyc01g059820	SL3.0ch01	68558969	68560969	-	2457	8044	2692	8286	23.398	24.522	1.124	0.0289618	-5.12548e-15	-3.91086	1	1
Solyc01g059830	SL3.0ch01	68585000	68587000	-	14047	9350	18770	9261	60.038	66.962	6.92397	7.19843e-58	0.477177	5.94816	0.0734614	0.475062
Solyc01g059840	SL3.0ch01	68614183	68616183	-	2982	5346	3339	5235	35.807	38.943	3.1364	2.49543e-05	-5.12548e-15	-3.91086	1	1
Solyc01g059847	SL3.0ch01	68766660	68768660	-	4751	4410	6203	5169	51.861	54.546	2.6851	0.00011363	-5.12548e-15	-3.91086	1	1
Solyc01g059850	SL3.0ch01	68764610	68766610	+	2682	5092	3568	5210	34.5	40.647	6.14746	1.42296e-15	-5.12548e-15	-3.91086	1	1
Solyc01g059853	SL3.0ch01	68765836	68767836	+	2775	3414	5058	4969	44.838	50.444	5.60619	9.7666e-12	-5.12548e-15	-3.91086	1	1
Solyc01g059860	SL3.0ch01	68849616	68851616	-	9510	9623	11904	11367	49.705	51.154	1.4491	0.0020678	0.0306017	5.38811	0.923074	1
Solyc01g059870	SL3.0ch01	68885698	68887698	-	5503	7149	6165	6691	43.495	47.954	4.45916	2.4887e-12	0.0428993	4.59605	0.902261	1
Solyc01g059884	SL3.0ch01	68993446	68995446	+	1632	6978	1812	7056	18.955	20.433	1.47831	0.00850379	-5.12548e-15	-3.91086	1	1
Solyc01g059900	SL3.0ch01	69159463	69161463	+	741	2250	759	2050	24.774	27.02	2.24597	0.0271556	-5.12548e-15	-3.83322	1	1
Solyc07g008400	SL3.0ch01	69246696	69248696	+	1501	3337	1833	3659	31.025	33.376	2.3506	0.00697139	-5.12548e-15	-3.91086	1	1
Solyc01g059920	SL3.0ch01	69263635	69265635	+	2716	3887	2187	2703	41.133	44.724	3.59111	0.00011072	0.48462	2.5463	0.306324	0.978634
Solyc01g059960	SL3.0ch01	69298312	69300312	+	6704	4579	6276	4091	59.417	60.538	1.12142	0.0463664	-5.12548e-15	-3.87249	1	1
Solyc01g059980	SL3.0ch01	69319660	69321660	+	6517	6528	9852	6867	49.958	58.927	8.96913	3.08517e-52	-5.12548e-15	-3.91086	1	1
Solyc01g059965	SL3.0ch01	69319662	69321662	+	6517	6517	9851	6877	50	58.889	8.88929	2.58033e-51	3.79739	-3.71483	0.335657	1
Solyc01g059990	SL3.0ch01	69328468	69330468	+	4351	5769	5848	7142	42.994	45.019	2.02517	0.00150746	5.84708	-2.19551	0.0905274	0.53073
Solyc01g059967	SL3.0ch01	69329291	69331291	+	3097	4484	3939	5337	40.852	42.464	1.61229	0.0195234	-5.12548e-15	-3.91086	1	1
Solyc01g060010	SL3.0ch01	69340199	69342199	-	3256	5874	4302	6853	35.663	38.566	2.90302	2.16216e-05	-5.12548e-15	-3.91086	1	1
Solyc01g060020	SL3.0ch01	69345249	69347249	-	5183	5234	6685	5283	49.755	55.857	6.10208	4.05429e-19	-5.12548e-15	-3.91086	1	1
Solyc01g060030	SL3.0ch01	69376517	69378517	+	10876	7910	13293	9067	57.894	59.45	1.55573	0.00104924	-0.407702	6.60143	0.135013	0.658596
Solyc01g060043	SL3.0ch01	69410727	69412727	+	2475	5611	3067	5660	30.608	35.144	4.53535	8.57008e-10	-5.12548e-15	-3.91086	1	1
Solyc01g060045	SL3.0ch01	69415551	69417551	+	1811	3478	2425	3641	34.241	39.977	5.73604	5.8522e-10	-5.12548e-15	-3.91086	1	1
Solyc01g060047	SL3.0ch01	69417383	69419383	+	1955	5304	1861	4592	26.932	28.839	1.90722	0.00791219	-5.12548e-15	-3.91086	1	1
Solyc01g060080	SL3.0ch01	69524484	69526484	-	4657	7412	4230	5732	38.586	42.461	3.87489	9.74463e-09	-0.214076	5.32462	0.477337	1
Solyc01g060140	SL3.0ch01	69620226	69622226	-	24	466	86	614	4.898	12.286	7.38776	1.05123e-05	-0.374616	6.37171	0.165334	0.731166
Solyc01g060185	SL3.0ch01	69705044	69707044	-	2611	7682	2825	7532	25.367	27.276	1.90948	0.00132414	1.80912	-3.87049	1	1
Solyc01g060200	SL3.0ch01	69724450	69726450	-	4881	5239	6154	5173	48.231	54.33	6.09914	2.48749e-18	-4.40223	-3.09027	0.0929736	0.538714
Solyc01g060220	SL3.0ch01	69741294	69743294	-	6028	11070	6567	11168	35.256	37.028	1.77289	0.000462072	-2.57241	-2.48429	0.259642	0.907366
Solyc01g060245	SL3.0ch01	69902900	69904900	+	8260	7550	9772	8224	52.245	54.301	2.05554	0.000141107	-0.288556	1.70084	0.676134	1
Solyc01g060250	SL3.0ch01	69902922	69904922	+	8260	7560	9775	8234	52.212	54.278	2.06603	0.000130944	0.962607	-1.24909	0.276383	0.934683
Solyc01g060260	SL3.0ch01	69909858	69911858	+	1	236	52	261	0.422	16.613	16.1915	3.09199e-12	-1.34746	0.429459	0.0287659	0.266443
Solyc01g060281	SL3.0ch01	69955476	69957476	+	1518	3030	1594	2411	33.377	39.8	6.42294	1.47236e-09	-5.12548e-15	-3.91086	1	1
Solyc01g060282	SL3.0ch01	69981130	69983130	+	2923	8987	4080	11461	24.542	26.253	1.71074	0.000964348	-5.12548e-15	-3.91086	1	1
Solyc01g060284	SL3.0ch01	69996146	69998146	+	1474	4217	1823	4471	25.901	28.964	3.06355	0.0001525	-5.12548e-15	-3.91086	1	1
Solyc01g060300	SL3.0ch01	69996146	69998146	+	1474	4217	1823	4471	25.901	28.964	3.06355	0.0001525	-5.12548e-15	-3.91086	1	1
Solyc01g060288	SL3.0ch01	70030676	70032676	+	820	3224	1076	3363	20.277	24.24	3.96274	1.35553e-05	-5.12548e-15	-3.91086	1	1
Solyc01g060312	SL3.0ch01	70101534	70103534	-	2469	6655	2393	5351	27.06	30.901	3.84084	6.49798e-08	-5.12548e-15	-3.91086	1	1
Solyc01g060316	SL3.0ch01	70141007	70143007	+	2046	6052	2140	5064	25.265	29.706	4.44022	1.54918e-09	-5.12548e-15	-3.91086	1	1
Solyc01g060318	SL3.0ch01	70193267	70195267	+	940	2585	1232	2756	26.667	30.893	4.22601	5.21148e-05	-5.12548e-15	-3.02414	1	1
Solyc01g060350	SL3.0ch01	70259992	70261992	+	2137	6614	2309	6488	24.42	26.248	1.82752	0.00358611	-5.12548e-15	-3.62909	1	1
Solyc01g060450	SL3.0ch01	70958501	70960501	+	1425	1830	1628	1876	43.779	46.461	2.68239	0.0156314	-5.12548e-15	-3.80122	1	1
Solyc01g060460	SL3.0ch01	70968120	70970120	-	2872	5307	2905	4873	35.114	37.349	2.23462	0.00228835	-2.00015	-3.5747	1	1
Solyc01g060455	SL3.0ch01	70968456	70970456	-	3641	6417	3463	5692	36.2	37.826	1.62628	0.0118368	-5.12548e-15	-3.83362	1	1
Solyc01g060470	SL3.0ch01	70985358	70987358	+	3172	5884	2987	4683	35.027	38.944	3.91744	2.35626e-07	0.107946	8.35169	0.701612	1
Solyc01g060490	SL3.0ch01	71209161	71211161	+	468	8288	617	8724	5.345	6.605	1.26038	0.000287236	2.63862	-1.09607	0.555038	1
Solyc01g065500	SL3.0ch01	71559332	71561332	-	12041	9323	13342	9196	56.361	59.198	2.83663	3.29525e-09	-1.02128	4.58695	0.020813	0.215757
Solyc01g065510	SL3.0ch01	71591311	71593311	-	1804	6139	1968	5859	22.712	25.144	2.43191	0.000293942	1.3849	3.79469	0.00627441	0.0918637
Solyc01g065540	SL3.0ch01	71627549	71629549	-	3722	7718	5170	9638	32.535	34.914	2.3786	5.04908e-05	-0.466472	4.51654	0.129539	0.644418
Solyc01g065550	SL3.0ch01	71698717	71700717	+	9247	5480	13032	7046	62.789	64.907	2.11743	4.65937e-05	0.43613	2.69	0.263103	0.913213
Solyc01g065560	SL3.0ch01	71710547	71712547	-	2286	4943	3031	5978	31.623	33.644	2.0215	0.00413534	-0.167756	3.34828	0.686223	1
Solyc01g065580	SL3.0ch01	71750781	71752781	-	6936	8200	7161	8040	45.825	47.109	1.28422	0.0145193	-0.098588	5.50005	0.724098	1
Solyc01g065570	SL3.0ch01	71742227	71744227	+	6597	9668	8651	10438	40.559	45.319	4.75981	1.07388e-18	-5.12548e-15	-3.91086	1	1
Solyc01g065573	SL3.0ch01	71761457	71763457	+	3908	6624	5993	7258	37.106	45.227	8.12081	2.02991e-35	-5.12548e-15	-3.91086	1	1
Solyc01g065575	SL3.0ch01	71761669	71763669	+	3769	6204	5792	6657	37.792	46.526	8.73379	2.71737e-38	-5.12548e-15	-3.91086	1	1
Solyc01g065577	SL3.0ch01	71762126	71764126	+	2704	6378	3944	7719	29.773	33.816	4.04316	1.13612e-09	0.0441552	-3.53375	1	1
Solyc01g065590	SL3.0ch01	71771680	71773680	-	2259	4191	3259	5113	35.023	38.927	3.90412	1.39194e-06	-5.12548e-15	-3.91086	1	1
Solyc01g065593	SL3.0ch01	71773395	71775395	+	1630	3540	2496	4451	31.528	35.929	4.40113	5.51648e-07	-5.12548e-15	-3.91086	1	1
Solyc01g065597	SL3.0ch01	71776016	71778016	+	1769	3174	1918	2456	35.788	43.85	8.06204	8.22778e-15	-2.47752	-3.83477	0.635669	1
Solyc01g065610	SL3.0ch01	71796538	71798538	+	2476	6011	2699	5559	29.174	32.683	3.50943	1.18557e-06	2.69394	-3.72016	0.619059	1
Solyc01g065620	SL3.0ch01	71831829	71833829	+	1835	3202	2159	3316	36.43	39.434	3.00338	0.00114907	-0.676137	-3.79646	1	1
Solyc01g065630	SL3.0ch01	71944394	71946394	+	3886	4454	4308	4314	46.595	49.965	3.37048	1.24063e-05	3.68916	-3.74492	0.427061	1
Solyc01g065640	SL3.0ch01	71944692	71946692	+	3158	4504	3750	4595	41.216	44.937	3.7207	2.47599e-06	0.607398	-3.71917	1	1
Solyc01g065645	SL3.0ch01	72037969	72039969	+	3299	7791	3442	7745	29.748	30.768	1.02034	0.0491764	-5.12548e-15	-3.67781	1	1
Solyc01g065680	SL3.0ch01	72052627	72054627	+	4158	7252	5926	9727	36.442	37.859	1.41684	0.0101911	3.12542	-0.247457	0.294733	0.962047
Solyc01g065710	SL3.0ch01	72117917	72119917	-	3634	5813	4177	5950	38.467	41.246	2.77894	6.88012e-05	0.626194	2.17758	0.197316	0.798009
Solyc01g065720	SL3.0ch01	72143884	72145884	-	12289	8718	15249	9743	58.5	61.016	2.51598	6.34493e-08	-0.406773	6.13037	0.142314	0.6769
Solyc01g065740	SL3.0ch01	72159023	72161023	+	7728	5598	9196	5763	57.992	61.475	3.4828	4.65054e-09	-0.44705	2.42112	0.327457	1
Solyc01g065760	SL3.0ch01	72182558	72184558	+	2676	5192	2781	4430	34.011	38.566	4.5549	1.09126e-08	-5.12548e-15	-3.91086	1	1
Solyc01g065770	SL3.0ch01	72216005	72218005	-	1773	1522	3105	2375	53.809	56.661	2.85178	0.00587964	-5.12548e-15	-3.91086	1	1
Solyc01g065780	SL3.0ch01	72217589	72219589	-	2499	2082	2625	1909	54.551	57.896	3.34449	0.000976474	-5.12548e-15	-3.91086	1	1
Solyc01g065790	SL3.0ch01	72215870	72217870	+	1934	1748	2874	2398	52.526	54.514	1.98861	0.0331739	-5.12548e-15	-3.91086	1	1
Solyc01g065795	SL3.0ch01	72218672	72220672	-	1803	1831	2190	1974	49.615	52.594	2.97891	0.0056371	-5.12548e-15	-3.91086	1	1
Solyc01g065800	SL3.0ch01	72216307	72218307	+	1916	1658	3159	2166	53.609	59.324	5.71454	1.40126e-07	-5.12548e-15	-3.91086	1	1
Solyc01g065810	SL3.0ch01	72217929	72219929	+	2492	2155	2419	1755	53.626	57.954	4.32801	4.29937e-05	-5.12548e-15	-3.91086	1	1
Solyc01g065820	SL3.0ch01	72223953	72225953	+	1206	5525	1387	4741	17.917	22.634	4.71671	6.61853e-11	1.8005	-3.73053	1	1
Solyc01g065830	SL3.0ch01	72229151	72231151	-	2245	5930	2564	6325	27.462	28.845	1.38287	0.0248231	-5.12548e-15	-3.91086	1	1
Solyc01g065860	SL3.0ch01	72311116	72313116	+	1871	3909	2363	4114	32.37	36.483	4.1127	2.13496e-06	-5.12548e-15	-3.91086	1	1
Solyc01g065870	SL3.0ch01	72313876	72315876	+	3350	5936	3440	5471	36.076	38.604	2.52816	0.000356396	-5.12548e-15	-3.91086	1	1
Solyc01g065880	SL3.0ch01	72314125	72316125	+	2614	4943	3015	4988	34.59	37.673	3.08293	6.08271e-05	-5.12548e-15	-3.91086	1	1
Solyc01g065910	SL3.0ch01	72385800	72387800	+	1931	7125	1932	6149	21.323	23.908	2.58505	5.21148e-05	-5.12548e-15	-3.91086	1	1
Solyc01g065915	SL3.0ch01	72491979	72493979	-	940	2419	796	1841	27.985	30.186	2.2013	0.0323835	-0.60681	-1.90577	0.571113	1
Solyc01g065960	SL3.0ch01	72525892	72527892	-	3040	4067	3391	3893	42.775	46.554	3.77936	6.07627e-06	-1.59229	-0.867776	0.230206	0.855481
Solyc01g065970	SL3.0ch01	72540623	72542623	-	1361	4132	1915	5131	24.777	27.179	2.40155	0.0016987	-5.12548e-15	-3.91086	1	1
Solyc01g065985	SL3.0ch01	72639765	72641765	-	2804	5785	3541	6211	32.646	36.311	3.66409	2.78497e-07	-5.12548e-15	-3.91086	1	1
Solyc01g066010	SL3.0ch01	72678019	72680019	-	1107	2279	1197	1795	32.693	40.007	7.31324	2.49233e-09	0.854265	-2.25817	0.500284	1
Solyc01g066020	SL3.0ch01	72702973	72704973	-	6691	5986	9666	6812	52.781	58.66	5.87941	9.45491e-23	-5.12548e-15	-2.55868	1	1
[truncated: 14,763 more rows]

## Sheet: PHYB1B2_hypo_DMP_BK_All
Supplementary Table 13. Total differentially methylated promoters (DMPs) in breaker fruits in all mC contexts
[truncated: 8,497 more rows]

[truncated: 1 more sheets: PHYB1B2_hyper_DMP_BK_All]
