# Supplementary material for: Phytochrome-Mediated Light Perception Affects Fruit Development and Ripening Through Epigenetic Mechanisms
Source: Front Plant Sci. 2022 Apr 28;13:870974. doi: 10.3389/fpls.2022.870974 (PMC9096621; doi:10.3389/fpls.2022.870974)
Supplement: Supplementary file 11 [file Data_Sheet_11.XLSX]

## Sheet: PHYA_vs_WT_IG_hypomethylated
Supplementary Table 14. Total differentially methylated promoters (DMPs) in CG context
ID	chr	from	to	strand	met_WT	unmet_WT	met_PHYA	unmet_PHYA	X.met_WT	X.met_PHYA	X.diff_PHYA.ctrl	FDR_diff_PHYA.WT	logFC_PHYA	logCPM_PHYA	PValue_PHYA	padj_PHYA
Solyc00g005040	SL3.0ch00	546343	548343	+	1578	84	1391	148	94.946	90.383	-4.56248	5.16387e-06	0.479201	1.90935	0.294354	1
Solyc00g005090	SL3.0ch00	1061916	1063916	-	123	10	67	15	92.481	81.707	-10.7739	0.046324	0	-3.91086	1	1
Solyc00g005094	SL3.0ch00	1146952	1148952	-	1581	521	1158	501	75.214	69.801	-5.413	0.000811946	0.0277807	5.51214	0.962023	1
Solyc00g005287	SL3.0ch00	2357974	2359974	-	658	94	471	99	87.5	82.632	-4.86842	0.0284238	4.34896	-3.3494	0.122502	1
Solyc00g005440	SL3.0ch00	2365409	2367409	-	913	112	933	170	89.073	84.587	-4.48568	0.00670622	0	-3.91086	1	1
Solyc00g006090	SL3.0ch00	4007717	4009717	+	422	17	164	20	96.128	89.13	-6.99713	0.00386974	0	-3.91086	1	1
Solyc00g006550	SL3.0ch00	4529463	4531463	-	467	45	392	66	91.211	85.59	-5.62142	0.014332	0	-3.91086	1	1
Solyc00g006680	SL3.0ch00	5629656	5631656	+	30949	3494	9527	1510	89.856	86.319	-3.53696	2.6883e-22	0.0840125	-3.31508	1	1
Solyc00g008070	SL3.0ch00	7078627	7080627	+	568	36	645	75	94.04	89.583	-4.4564	0.00922593	0	-3.91086	1	1
Solyc00g008570	SL3.0ch00	7584122	7586122	-	359319	21894	97103	7021	94.257	93.257	-0.999676	9.85011e-31	1.73308	4.32545	0.00294513	0.228012
Solyc00g008580	SL3.0ch00	7582182	7584182	+	197233	18048	52941	6263	91.617	89.421	-2.19522	1.55945e-57	1.77258	5.85972	0.0067089	0.37969
Solyc00g009146	SL3.0ch00	8215570	8217570	-	537	83	298	95	86.613	75.827	-10.7859	7.42971e-05	1.78812	-3.87428	1	1
Solyc00g009760	SL3.0ch00	8404083	8406083	+	9248	960	3454	446	90.596	88.564	-2.03151	0.00129561	1.41753	4.48675	0.0172519	0.632363
Solyc00g010530	SL3.0ch00	8854847	8856847	-	44429	3247	14557	1319	93.189	91.692	-1.49758	5.73686e-09	1.02225	-2.83969	0.517543	1
Solyc00g011150	SL3.0ch00	9131088	9133088	-	117527	15027	33831	5849	88.663	85.26	-3.40391	6.93248e-69	1.56956	4.0957	0.00726466	0.402232
Solyc00g011160	SL3.0ch00	9129189	9131189	+	371451	11662	92651	3740	96.956	96.12	-0.83602	8.41561e-36	1.75312	5.13575	0.00352554	0.253725
Solyc03g043580	SL3.0ch00	9309777	9311777	+	280	25	117	31	91.803	79.054	-12.7492	0.000771605	0	-3.91086	1	1
Solyc00g012430	SL3.0ch00	9551103	9553103	+	66272	5376	18594	2164	92.497	89.575	-2.92155	1.21396e-37	2.22073	0.150227	0.0387279	0.91239
Solyc00g012440	SL3.0ch00	9563323	9565323	+	4485	470	1941	271	90.515	87.749	-2.76599	0.00159419	1.61738	2.48019	0.0155672	0.600009
Solyc00g020545	SL3.0ch00	10945268	10947268	+	15593	2432	6980	1280	86.508	84.504	-2.004	8.74506e-05	-0.113495	-3.0763	1	1
Solyc00g020940	SL3.0ch00	10946755	10948755	+	18873	2073	8095	1188	90.103	87.202	-2.90071	2.96637e-12	0	-3.91086	1	1
Solyc00g039290	SL3.0ch00	12147085	12149085	+	195	21	145	32	90.278	81.921	-8.35687	0.033263	0	-3.91086	1	1
Solyc00g050130	SL3.0ch00	12693606	12695606	+	1184	181	1045	226	86.74	82.219	-4.5212	0.00409221	0.191411	3.58135	0.75812	1
Solyc00g052430	SL3.0ch00	12801179	12803179	+	1939	269	1166	207	87.817	84.924	-2.8935	0.0289846	1.88316	-3.40262	1	1
Solyc00g056680	SL3.0ch00	13006301	13008301	+	1570	634	1416	691	71.234	67.205	-4.02956	0.0106878	-0.548281	1.13422	0.376594	1
Solyc00g068970	SL3.0ch00	13555018	13557018	-	6492	968	2501	513	87.024	82.979	-4.0447	9.28927e-07	1.52842	4.99672	0.0102499	0.483968
Solyc00g068980	SL3.0ch00	13553285	13555285	+	103254	7201	30662	3210	93.481	90.523	-2.95746	5.64517e-69	1.97808	2.42878	0.00689965	0.38864
Solyc00g071180	SL3.0ch00	13651920	13653920	-	1400	451	1001	435	75.635	69.708	-5.92727	0.000631322	0	-0.604256	1	1
Solyc00g084750	SL3.0ch00	14210498	14212498	-	1540	118	1431	146	92.883	90.742	-2.14108	0.0490142	0	-3.91086	1	1
Solyc00g084760	SL3.0ch00	14211628	14213628	-	910	50	790	72	94.792	91.647	-3.14433	0.0180007	-1.62709	-2.89452	0.419076	1
Solyc00g090860	SL3.0ch00	14446495	14448495	-	512	323	423	379	61.317	52.743	-8.57422	0.00156466	0	-3.91086	1	1
Solyc00g094520	SL3.0ch00	14585676	14587676	-	553	26390	257	19799	2.052	1.281	-0.771069	1.66633e-09	1.80124	-2.96074	1	1
Solyc00g094530	SL3.0ch00	14586705	14588705	-	609	30409	311	22264	1.963	1.378	-0.585746	1.56907e-06	3.5425	-2.86231	0.334099	1
Solyc00g110870	SL3.0ch00	15184121	15186121	-	1730	320	452	159	84.39	73.977	-10.4132	1.34822e-07	-0.891235	-0.077562	0.442095	1
Solyc00g117653	SL3.0ch00	15444881	15446881	-	459	19392	184	12277	2.312	1.477	-0.835619	9.50358e-07	2.65328	-3.83525	0.58676	1
Solyc00g118680	SL3.0ch00	15446465	15448465	-	986	15302	340	9581	6.054	3.427	-2.62646	2.32761e-20	-1.71146	-3.2667	0.583103	1
Solyc00g118690	SL3.0ch00	15444367	15446367	+	354	16429	166	10288	2.109	1.588	-0.521368	0.00596767	1.89869	-3.83472	1	1
Solyc00g120930	SL3.0ch00	15516659	15518659	-	570	38	473	59	93.75	88.91	-4.84023	0.00958508	0	-3.91086	1	1
Solyc00g129880	SL3.0ch00	15807077	15809077	+	633	73	592	121	89.66	83.029	-6.6306	0.000981784	0	-3.91086	1	1
Solyc00g185750	SL3.0ch00	17490434	17492434	-	683	92	644	129	88.129	83.312	-4.81726	0.015755	0	-3.91086	1	1
Solyc00g185850	SL3.0ch00	17489695	17491695	+	378	39	339	63	90.647	84.328	-6.31912	0.0171164	0	-3.91086	1	1
Solyc00g209460	SL3.0ch00	18132723	18134723	-	471	10	452	35	97.921	92.813	-5.10786	0.000674528	-1.00958	-0.319692	0.171191	1
Solyc12g062400	SL3.0ch00	18133196	18135196	+	445	10	430	36	97.802	92.275	-5.52752	0.000451653	0	-3.91086	1	1
Solyc00g217960	SL3.0ch00	18350138	18352138	+	442	235	215	182	65.288	54.156	-11.1319	0.00122615	-0.410296	4.61513	0.285253	1
Solyc00g247305	SL3.0ch00	19115642	19117642	-	1315	368	1209	416	78.134	74.4	-3.73428	0.0250928	0	-3.86745	1	1
Solyc00g280110	SL3.0ch00	19855053	19857053	-	1251	201	1029	260	86.157	79.829	-6.3277	5.58828e-05	3.03458	-2.64721	0.0974665	1
Solyc00g294237	SL3.0ch00	20270253	20272253	+	963	54	1146	101	94.69	91.901	-2.7897	0.0197602	0	-3.44568	1	1
Solyc00g318130	SL3.0ch00	20685614	20687614	+	19	0	6	4	100	60	-40	0.0187571	1.90137	-3.87171	1	1
Solyc01g005060	SL3.0ch01	61589	63589	-	114	409	100	516	21.797	16.234	-5.56356	0.0340625	0	-3.91086	1	1
Solyc01g005150	SL3.0ch01	134364	136364	-	947	449	547	520	67.837	51.265	-16.5714	2.61533e-15	-1.13579	-0.622394	0.140899	1
Solyc01g005160	SL3.0ch01	135970	137970	+	1665	854	1216	769	66.098	61.259	-4.83821	0.00251622	1.31514	4.03479	0.289776	1
Solyc01g005200	SL3.0ch01	152262	154262	+	33	304	7	205	9.792	3.302	-6.4904	0.00947306	-2.26615	-3.05079	0.260619	1
Solyc01g005210	SL3.0ch01	163331	165331	+	412	241	326	287	63.093	53.181	-9.91234	0.00136057	-0.396712	6.30086	0.320442	1
Solyc01g005340	SL3.0ch01	245710	247710	-	1053	699	744	831	60.103	47.238	-12.8646	2.16829e-12	-0.0880429	5.00912	0.793856	1
Solyc01g005360	SL3.0ch01	255331	257331	+	471	572	354	589	45.158	37.54	-7.61843	0.00199359	0	-3.91086	1	1
Solyc01g005370	SL3.0ch01	257883	259883	+	1076	870	809	823	55.293	49.571	-5.72183	0.00215166	0.483299	4.67631	0.157894	1
Solyc01g005400	SL3.0ch01	277103	279103	+	765	84	677	130	90.106	83.891	-6.21505	0.000671951	0.158642	2.05404	0.85419	1
Solyc01g005460	SL3.0ch01	321092	323092	-	1168	525	938	633	68.99	59.707	-9.28277	2.85016e-07	-0.51569	-0.216058	0.52656	1
Solyc01g005510	SL3.0ch01	348880	350880	-	788	218	592	303	78.33	66.145	-12.1848	3.16808e-08	4.4019	-3.29228	0.199436	1
Solyc01g005520	SL3.0ch01	348023	350023	+	844	306	617	337	73.391	64.675	-8.71625	9.14526e-05	-0.859494	4.449	0.0154269	0.597821
Solyc01g005540	SL3.0ch01	370504	372504	-	1197	132	1244	207	90.068	85.734	-4.33374	0.00161589	-0.195523	3.68431	0.554585	1
Solyc01g005550	SL3.0ch01	380342	382342	+	2418	907	1946	912	72.722	68.09	-4.63223	0.000298148	0.305464	5.38073	0.319757	1
Solyc01g005575	SL3.0ch01	409305	411305	-	834	171	741	200	82.985	78.746	-4.23906	0.0336125	0.138377	5.66697	0.623109	1
Solyc01g005700	SL3.0ch01	484939	486939	-	528	90	502	122	85.437	80.449	-4.98818	0.0416456	-0.0892795	4.14534	0.773975	1
Solyc01g005705	SL3.0ch01	493420	495420	-	473	90	421	183	84.014	69.702	-14.3122	7.72428e-08	0	-3.79024	1	1
Solyc01g005720	SL3.0ch01	485249	487249	+	414	86	368	115	82.8	76.19	-6.60952	0.0230018	-0.275368	1.24495	0.708841	1
Solyc01g005730	SL3.0ch01	488688	490688	+	386	214	252	282	64.333	47.191	-17.1423	7.93017e-08	0.0106423	7.85887	0.983638	1
Solyc01g005800	SL3.0ch01	515973	517973	-	1527	290	1264	315	84.04	80.051	-3.98896	0.00668774	1.27982	2.02874	0.148929	1
Solyc01g005820	SL3.0ch01	533571	535571	+	969	225	711	276	81.156	72.036	-9.1193	3.67651e-06	0.0740488	7.47843	0.802009	1
Solyc01g005900	SL3.0ch01	593877	595877	-	253	279	184	315	47.556	36.874	-10.6826	0.00172287	1.81335	-3.25021	1	1
Solyc01g005910	SL3.0ch01	588593	590593	+	1393	219	1173	386	86.414	75.241	-11.1739	2.90868e-14	-0.0735646	4.94696	0.793025	1
Solyc01g005920	SL3.0ch01	602186	604186	-	1867	389	1532	466	82.757	76.677	-6.08042	6.03949e-06	-1.3534	1.46283	0.0220738	0.701811
Solyc01g005940	SL3.0ch01	612494	614494	+	1296	76	1180	124	94.461	90.491	-3.96984	0.000483366	3.59439	-3.5614	0.3824	1
Solyc01g005970	SL3.0ch01	640038	642038	+	1209	331	762	293	78.506	72.227	-6.27901	0.000940183	0.179813	2.72944	0.654338	1
Solyc01g006060	SL3.0ch01	735073	737073	+	785	135	733	180	85.326	80.285	-5.04131	0.0104691	-1.82447	-3.51211	0.634397	1
Solyc01g006160	SL3.0ch01	807962	809962	-	798	362	632	409	68.793	60.711	-8.08225	0.000338916	0.306121	7.82334	0.327291	1
Solyc01g006170	SL3.0ch01	811277	813277	-	1337	193	1077	266	87.386	80.194	-7.19202	1.39495e-06	0.727463	4.24442	0.0673227	1
Solyc01g006290	SL3.0ch01	882366	884366	+	1884	708	1293	695	72.685	65.04	-7.64494	2.80445e-07	0	2.82469	1	1
Solyc01g006360	SL3.0ch01	981297	983297	-	554	950	445	985	36.835	31.119	-5.71623	0.00351162	0.351399	4.04951	0.597792	1
Solyc01g006420	SL3.0ch01	1027975	1029975	+	1702	458	1359	511	78.796	72.674	-6.1225	3.58497e-05	0	-3.91086	1	1
Solyc01g006490	SL3.0ch01	1086682	1088682	-	1989	390	1854	454	83.607	80.329	-3.27727	0.00933831	0.461596	4.64758	0.131856	1
Solyc01g006520	SL3.0ch01	1097091	1099091	+	888	171	714	216	83.853	76.774	-7.0785	0.000358805	-0.269576	1.55837	0.723033	1
Solyc01g006530	SL3.0ch01	1102222	1104222	+	1564	92	1378	264	94.444	83.922	-10.5224	2.21113e-21	0	-3.87049	1	1
Solyc01g006540	SL3.0ch01	1111464	1113464	+	1320	341	1053	380	79.47	73.482	-5.98799	0.000416562	2.07905	7.83987	0.0281906	0.792453
Solyc01g006560	SL3.0ch01	1132896	1134896	-	916	326	629	277	73.752	69.426	-4.32596	0.0488943	-1.47297	-0.819997	0.1075	1
Solyc01g006565	SL3.0ch01	1139192	1141192	-	583	272	450	278	68.187	61.813	-6.37395	0.0175228	-5.83523	-3.20204	0.100185	1
Solyc01g006570	SL3.0ch01	1145087	1147087	-	1345	147	930	146	90.147	86.431	-3.71623	0.00923238	0	-3.91086	1	1
Solyc01g006575	SL3.0ch01	1172601	1174601	+	1290	203	798	179	86.403	81.679	-4.72461	0.00476637	0	-3.91086	1	1
Solyc01g006600	SL3.0ch01	1207284	1209284	-	2044	319	1808	374	86.5	82.86	-3.64045	0.00219737	-1.87595	-2.97816	0.409009	1
Solyc01g006660	SL3.0ch01	1255271	1257271	-	1787	510	1626	553	77.797	74.621	-3.17574	0.025158	-0.04431	-2.81204	1	1
Solyc01g006690	SL3.0ch01	1270429	1272429	-	2081	758	1621	848	73.3	65.654	-7.64635	1.90426e-08	0.20179	1.93278	0.721633	1
Solyc01g006700	SL3.0ch01	1285021	1287021	-	829	683	707	725	54.828	49.372	-5.45653	0.00790357	-0.0261897	5.26629	0.923298	1
Solyc01g006710	SL3.0ch01	1282788	1284788	+	72	43	60	119	62.609	33.52	-29.0891	8.50519e-06	0.263937	4.70736	0.388644	1
Solyc01g006740	SL3.0ch01	1340485	1342485	-	1201	59	1123	97	95.317	92.049	-3.26828	0.00270899	-0.206356	2.94886	0.588803	1
Solyc01g006760	SL3.0ch01	1350019	1352019	-	576	239	407	222	70.675	64.706	-5.96896	0.0318671	0	-3.91086	1	1
Solyc01g006800	SL3.0ch01	1362187	1364187	+	1492	220	1495	273	87.15	84.559	-2.59071	0.0489253	0.15495	6.54677	0.56242	1
Solyc01g006810	SL3.0ch01	1370832	1372832	+	2035	433	1814	488	82.455	78.801	-3.65439	0.00400033	-0.449469	4.12271	0.186386	1
Solyc01g006830	SL3.0ch01	1404011	1406011	-	767	493	612	489	60.873	55.586	-5.28718	0.0199083	-0.0823912	6.00255	0.767457	1
Solyc01g006840	SL3.0ch01	1415474	1417474	-	1677	670	1393	675	71.453	67.36	-4.09315	0.00869522	4.14377	-3.69072	0.332837	1
Solyc01g006890	SL3.0ch01	1462996	1464996	+	2458	974	2085	939	71.62	68.948	-2.67163	0.0369487	-0.0342983	2.94066	0.952692	1
Solyc01g006950	SL3.0ch01	1517487	1519487	-	472	619	355	647	43.263	35.429	-7.83392	0.00101609	1.23299	4.78704	0.277995	1
Solyc01g006980	SL3.0ch01	1549134	1551134	+	628	597	525	631	51.265	45.415	-5.85008	0.0109329	-0.394276	5.25067	0.162192	1
Solyc01g007030	SL3.0ch01	1582763	1584763	-	1290	1032	988	960	55.556	50.719	-4.83687	0.004666	0.0918527	4.20892	0.933512	1
Solyc01g007040	SL3.0ch01	1583263	1585263	-	1588	1087	1217	1008	59.364	54.697	-4.66786	0.0031046	0.0770549	3.13121	0.940726	1
Solyc01g007080	SL3.0ch01	1632919	1634919	-	44	55	4	42	44.444	8.696	-35.7488	5.15847e-05	0	-3.87229	1	1
Solyc01g007090	SL3.0ch01	1646002	1648002	+	2034	130	1992	176	93.993	91.882	-2.11069	0.0164618	0	-3.87203	1	1
Solyc01g007120	SL3.0ch01	1667482	1669482	-	1341	547	1189	604	71.028	66.313	-4.7141	0.00587057	-0.352973	2.93801	0.554269	1
Solyc01g007180	SL3.0ch01	1744700	1746700	-	1297	438	1192	623	74.755	65.675	-9.08011	3.65598e-08	0.313107	2.91454	0.444961	1
Solyc01g007270	SL3.0ch01	1834160	1836160	+	1011	335	827	350	75.111	70.263	-4.84806	0.0156042	0	-3.91086	1	1
Solyc01g007265	SL3.0ch01	1835604	1837604	+	281	137	198	140	67.225	58.58	-8.645	0.0292468	-0.539905	2.53707	0.216709	1
Solyc01g007780	SL3.0ch01	1868678	1870678	-	863	683	796	749	55.821	51.521	-4.30044	0.0325769	0.61512	1.50075	0.333095	1
Solyc01g007890	SL3.0ch01	1998989	2000989	-	519	1121	295	929	31.646	24.101	-7.54503	4.847e-05	-0.0385082	0.617487	0.970394	1
Solyc01g007910	SL3.0ch01	2038540	2040540	+	2571	359	2598	478	87.747	84.46	-3.2871	0.000920556	0.303126	6.28127	0.325206	1
Solyc01g007950	SL3.0ch01	2072713	2074713	-	463	26	563	75	94.683	88.245	-6.43851	0.000550372	0	-3.91086	1	1
Solyc01g008040	SL3.0ch01	2133305	2135305	-	788	248	624	281	76.062	68.95	-7.1115	0.00165659	2.93019	2.50448	0.000371691	0.0503988
Solyc01g008050	SL3.0ch01	2132652	2134652	+	521	567	218	301	47.886	42.004	-5.88218	0.0482675	6.1815	-1.17019	0.0105531	0.488029
Solyc01g008080	SL3.0ch01	2157582	2159582	-	1314	599	1067	614	68.688	63.474	-5.2138	0.00300167	0.081211	6.32182	0.825233	1
Solyc01g008100	SL3.0ch01	2162618	2164618	+	1121	861	988	923	56.559	51.701	-4.85835	0.00648165	-0.462977	4.58042	0.154651	1
Solyc01g008115	SL3.0ch01	2178244	2180244	-	520	427	283	418	54.91	40.371	-14.5393	5.48922e-08	0	-3.91086	1	1
Solyc01g008150	SL3.0ch01	2236938	2238938	-	77	5	73	43	93.902	62.931	-30.9714	1.5724e-06	-0.531134	-2.52007	1	1
Solyc01g008190	SL3.0ch01	2275298	2277298	+	1880	302	1638	347	86.159	82.519	-3.6406	0.00379869	0.181222	2.24454	0.704827	1
Solyc01g008220	SL3.0ch01	2289692	2291692	-	1967	359	1690	402	84.566	80.784	-3.78184	0.00278077	-0.266614	2.42571	0.669749	1
Solyc01g008230	SL3.0ch01	2295195	2297195	-	1617	640	1447	842	71.644	63.215	-8.4284	1.66845e-08	0.410441	6.05417	0.11907	1
Solyc01g008280	SL3.0ch01	2324182	2326182	+	1175	346	1393	516	77.252	72.97	-4.28167	0.0103289	0.187362	5.36967	0.520047	1
Solyc01g008320	SL3.0ch01	2359806	2361806	+	2648	357	2451	456	88.12	84.314	-3.80607	0.000110907	0.532498	6.13021	0.0670438	1
Solyc01g008390	SL3.0ch01	2423103	2425103	-	172	2	192	15	98.851	92.754	-6.09695	0.0111458	0	-3.86883	1	1
Solyc01g008440	SL3.0ch01	2455095	2457095	+	1280	324	827	333	79.8	71.293	-8.5074	2.20337e-06	-0.162688	4.55181	0.670353	1
Solyc01g008460	SL3.0ch01	2481622	2483622	-	1650	626	1477	765	72.496	65.879	-6.61693	9.87945e-06	0.366894	4.23323	0.247911	1
Solyc01g008497	SL3.0ch01	2548843	2550843	-	1791	156	1363	268	91.988	83.568	-8.41931	2.02005e-13	3.64896	-0.116818	0.0546759	1
Solyc01g008500	SL3.0ch01	2543420	2545420	+	57	2	64	33	96.61	65.979	-30.6308	1.52919e-05	0	-3.91086	1	1
Solyc01g008560	SL3.0ch01	2598580	2600580	-	968	186	872	246	83.882	77.996	-5.88573	0.00137755	0.0620637	5.44718	0.900437	1
Solyc01g008620	SL3.0ch01	2633020	2635020	+	953	122	700	221	88.651	76.004	-12.6468	1.89615e-12	8.31419	-1.16532	0.00530598	0.32553
Solyc01g008650	SL3.0ch01	2648933	2650933	-	1309	258	1175	306	83.535	79.338	-4.19713	0.00812637	0	-3.91086	1	1
Solyc01g008680	SL3.0ch01	2674333	2676333	-	610	571	331	439	51.651	42.987	-8.66413	0.000762324	-0.950682	0.735163	0.20734	1
Solyc01g008700	SL3.0ch01	2685791	2687791	-	1364	328	1259	460	80.615	73.24	-7.3744	2.67663e-06	0.533562	6.063	0.192742	1
Solyc01g008710	SL3.0ch01	2687380	2689380	+	638	420	590	565	60.302	51.082	-9.22021	7.665e-05	-4.27517	10.1427	0.00184752	0.165205
Solyc01g008730	SL3.0ch01	2709114	2711114	-	2035	630	1557	584	76.36	72.723	-3.6372	0.00981603	0.304686	4.93619	0.241674	1
Solyc01g008800	SL3.0ch01	2774775	2776775	-	1579	171	1411	251	90.229	84.898	-5.33086	1.60863e-05	0.54084	-1.01086	0.597212	1
Solyc01g008810	SL3.0ch01	2774775	2776775	-	1579	171	1411	251	90.229	84.898	-5.33086	1.60863e-05	0.933805	1.43634	0.0829546	1
Solyc01g008820	SL3.0ch01	2776260	2778260	+	563	496	405	473	53.163	46.128	-7.0358	0.00588528	0.382632	5.7268	0.177676	1
Solyc01g008840	SL3.0ch01	2796561	2798561	+	1176	139	906	228	89.43	79.894	-9.53548	7.16321e-10	0.429384	6.46595	0.101799	1
Solyc01g008860	SL3.0ch01	2822967	2824967	-	1770	152	1468	171	92.092	89.567	-2.52476	0.0206892	0	-3.91086	1	1
Solyc01g008890	SL3.0ch01	2852040	2854040	-	2420	842	1873	866	74.188	68.383	-5.80499	5.27985e-06	0.180062	3.79302	0.578853	1
Solyc01g008900	SL3.0ch01	2853138	2855138	+	2194	319	1965	351	87.306	84.845	-2.46145	0.0272246	0.551987	2.41205	0.188889	1
Solyc01g008970	SL3.0ch01	2924248	2926248	-	3238	580	2669	553	84.809	82.837	-1.97205	0.0463582	-0.0279667	8.04409	0.916431	1
Solyc01g008980	SL3.0ch01	2927000	2929000	+	481	284	384	528	62.876	42.105	-20.7706	7.00835e-16	0.0696581	0.849862	0.914401	1
Solyc01g009010	SL3.0ch01	2946699	2948699	+	179	46	65	44	79.556	59.633	-19.9225	0.00075617	0.0669678	5.99752	0.84704	1
Solyc01g009015	SL3.0ch01	2950782	2952782	-	169	2	135	9	98.83	93.75	-5.08041	0.0457886	0	-3.91086	1	1
Solyc01g009020	SL3.0ch01	2958478	2960478	-	1843	782	1855	1037	70.21	64.142	-6.06706	1.0612e-05	-0.127414	7.18973	0.681322	1
Solyc01g009050	SL3.0ch01	2998631	3000631	-	1741	139	1476	157	92.606	90.386	-2.22059	0.037361	0.21365	5.57146	0.433927	1
Solyc01g009060	SL3.0ch01	2999584	3001584	+	2064	156	1947	210	92.973	90.264	-2.70872	0.00362765	-0.0264417	5.41274	0.919014	1
Solyc01g009120	SL3.0ch01	3077562	3079562	-	191	84	154	112	69.455	57.895	-11.5598	0.0127959	0.216635	4.0662	0.503179	1
Solyc01g009190	SL3.0ch01	3168921	3170921	+	1433	210	1364	273	87.219	83.323	-3.89535	0.0051243	-3.92221	-3.34744	0.411974	1
Solyc01g009220	SL3.0ch01	3181620	3183620	-	1197	108	759	105	91.724	87.847	-3.87692	0.00958568	-0.357219	-1.7345	0.778426	1
Solyc01g009240	SL3.0ch01	3200574	3202574	+	712	310	586	342	69.667	63.147	-6.52077	0.00642004	0	-3.69544	1	1
Solyc01g009270	SL3.0ch01	3227063	3229063	-	728	255	622	455	74.059	57.753	-16.306	1.65372e-13	0.63186	-2.76527	1	1
Solyc01g009320	SL3.0ch01	3437210	3439210	-	1232	182	1160	220	87.129	84.058	-3.07074	0.041615	0	-3.86959	1	1
Solyc01g009350	SL3.0ch01	3476831	3478831	-	1266	316	1108	358	80.025	75.58	-4.44548	0.00844673	0	-3.91086	1	1
Solyc01g009410	SL3.0ch01	3543927	3545927	+	1277	289	1155	322	81.545	78.199	-3.34629	0.0417037	0	-3.87342	1	1
Solyc01g009480	SL3.0ch01	3640739	3642739	-	1043	499	910	640	67.639	58.71	-8.92975	1.99701e-06	0	-3.86959	1	1
Solyc01g009550	SL3.0ch01	3741980	3743980	+	1795	313	1484	514	85.152	74.274	-10.8775	1.17531e-16	0	-3.91086	1	1
Solyc01g009560	SL3.0ch01	3748390	3750390	-	641	293	537	405	68.63	57.006	-11.6232	1.48319e-06	0	-3.91086	1	1
Solyc01g009600	SL3.0ch01	3771753	3773753	-	664	195	552	209	77.299	72.536	-4.76305	0.049	0	-3.91086	1	1
Solyc01g009610	SL3.0ch01	3780779	3782779	-	1016	618	761	614	62.179	55.345	-6.83325	0.000645678	0.0340493	4.24826	0.92284	1
Solyc01g009670	SL3.0ch01	3847938	3849938	-	758	491	590	465	60.689	55.924	-4.76438	0.0393852	-0.264234	0.217826	0.746876	1
Solyc01g009690	SL3.0ch01	3915149	3917149	-	306	6	237	19	98.077	92.578	-5.4988	0.00475145	0.32403	3.33846	0.663286	1
Solyc01g009695	SL3.0ch01	3908955	3910955	+	243	28	176	103	89.668	63.082	-26.5855	1.86007e-12	-1.93935	-3.87098	1	1
Solyc01g009715	SL3.0ch01	3934692	3936692	-	664	331	477	327	66.734	59.328	-7.40531	0.00389604	-0.874201	-3.08051	0.580554	1
Solyc01g009720	SL3.0ch01	3935091	3937091	-	634	315	486	320	66.807	60.298	-6.5094	0.0121066	0	-3.91086	1	1
Solyc01g009730	SL3.0ch01	3982582	3984582	-	611	302	560	362	66.922	60.738	-6.18471	0.014535	0	-3.91086	1	1
Solyc01g009930	SL3.0ch01	4459316	4461316	-	570	117	500	142	82.969	77.882	-5.08781	0.0396219	2.25614	-1.95204	0.160703	1
Solyc01g009935	SL3.0ch01	4462692	4464692	+	403	124	252	149	76.471	62.843	-13.6277	4.66997e-05	0	-3.91086	1	1
Solyc01g009940	SL3.0ch01	4475860	4477860	+	1622	213	1338	306	88.392	81.387	-7.00551	7.38761e-08	0	-3.91086	1	1
Solyc01g010050	SL3.0ch01	4617914	4619914	+	237	427	175	516	35.693	25.326	-10.3672	0.000162135	-0.425003	5.1104	0.171821	1
Solyc01g010140	SL3.0ch01	4819924	4821924	-	558	310	515	368	64.286	58.324	-5.96182	0.0221121	-1.91432	-3.87151	1	1
Solyc01g010170	SL3.0ch01	4903656	4905656	-	3377	263	3162	312	92.775	91.019	-1.75573	0.0153852	0	0.795032	1	1
Solyc01g010190	SL3.0ch01	4918301	4920301	+	1911	152	1622	182	92.632	89.911	-2.72078	0.00720826	0.368951	5.22372	0.303624	1
Solyc01g010230	SL3.0ch01	4944699	4946699	-	736	406	611	442	64.448	58.025	-6.42364	0.00568027	0.216328	6.51727	0.585928	1
Solyc01g010290	SL3.0ch01	5026834	5028834	-	127	5	100	65	96.212	60.606	-35.6061	4.54354e-13	-0.438718	4.45443	0.164723	1
Solyc01g010310	SL3.0ch01	5077993	5079993	-	1174	299	1006	375	79.701	72.846	-6.85553	9.15857e-05	-0.578465	3.2554	0.268338	1
Solyc01g010360	SL3.0ch01	5114498	5116498	-	853	111	286	118	88.485	70.792	-17.6934	3.21831e-13	-1.52767	-0.330225	0.154686	1
Solyc01g010390	SL3.0ch01	5197219	5199219	+	888	222	810	280	80	74.312	-5.68807	0.00451427	-0.148714	2.58213	0.762938	1
Solyc01g010530	SL3.0ch01	5494462	5496462	-	959	161	694	164	85.625	80.886	-4.73922	0.0132208	0	-3.91086	1	1
Solyc01g010650	SL3.0ch01	5604422	5606422	-	1287	259	1106	469	83.247	70.222	-13.0249	1.76702e-16	0.478325	5.48461	0.0900089	1
Solyc01g010710	SL3.0ch01	5684412	5686412	-	1284	133	1095	182	90.614	85.748	-4.86613	0.00037872	-1.5345	-0.629913	0.11271	1
Solyc01g010720	SL3.0ch01	5702925	5704925	-	1362	676	1106	734	66.83	60.109	-6.72153	8.08255e-05	-2.12743	0.45585	0.0041963	0.283195
Solyc01g010770	SL3.0ch01	5772212	5774212	-	962	350	680	393	73.323	63.374	-9.94945	1.51823e-06	1.40084	2.347	0.0279941	0.790911
Solyc01g010790	SL3.0ch01	5791274	5793274	-	21	55	2	42	27.632	4.545	-23.0861	0.00434386	0	-3.91086	1	1
Solyc01g010797	SL3.0ch01	5792494	5794494	+	111	101	85	123	52.358	40.865	-11.4931	0.0354212	0	-3.91086	1	1
Solyc01g010820	SL3.0ch01	6160833	6162833	+	1211	51	1154	75	95.959	93.897	-2.06132	0.039432	0.159702	5.09144	0.564234	1
Solyc01g010890	SL3.0ch01	6282902	6284902	+	1367	528	1078	574	72.137	65.254	-6.88297	5.67024e-05	0	-3.91086	1	1
Solyc01g010933	SL3.0ch01	6387420	6389420	+	1966	48	1718	83	97.617	95.391	-2.22523	0.000649262	1.60039	-3.32954	0.651621	1
Solyc01g010937	SL3.0ch01	6414523	6416523	+	467	47	306	57	90.856	84.298	-6.55851	0.009742	0.0882802	-3.20061	1	1
Solyc01g011010	SL3.0ch01	6819431	6821431	+	639	40	571	68	94.109	89.358	-4.75061	0.00489988	0.832088	1.33349	0.208082	1
Solyc01g011050	SL3.0ch01	6968179	6970179	+	932	549	722	555	62.93	56.539	-6.39169	0.00217941	0	-3.91086	1	1
Solyc01g011097	SL3.0ch01	7925456	7927456	-	766	61	679	83	92.624	89.108	-3.51633	0.0336018	0	-3.91086	1	1
Solyc01g011175	SL3.0ch01	8010230	8012230	-	584	67	633	114	89.708	84.739	-4.96919	0.0145801	0	-3.91086	1	1
Solyc01g011300	SL3.0ch01	8409393	8411393	-	1012	83	955	130	92.42	88.018	-4.40166	0.00210965	0	-3.91086	1	1
Solyc01g011335	SL3.0ch01	8618732	8620732	-	803	42	646	96	95.03	87.062	-7.96759	1.81119e-07	0	-3.91086	1	1
Solyc01g011480	SL3.0ch01	9329458	9331458	-	747	143	659	210	83.933	75.834	-8.09829	0.000111607	0	-3.91086	1	1
Solyc01g011490	SL3.0ch01	9339650	9341650	+	425	299	319	384	58.702	45.377	-13.3247	3.40511e-06	0	-3.91086	1	1
Solyc01g013990	SL3.0ch01	10717357	10719357	+	1065	163	824	195	86.726	80.864	-5.86279	0.000633116	0	-3.91086	1	1
Solyc01g014060	SL3.0ch01	11083011	11085011	-	141	441	74	455	24.227	13.989	-10.2381	9.36494e-05	0	-3.91086	1	1
Solyc01g014070	SL3.0ch01	11089333	11091333	-	1102	573	762	537	65.791	58.661	-7.13054	0.000298031	0	-3.91086	1	1
Solyc01g014130	SL3.0ch01	11609250	11611250	+	596	173	462	191	77.503	70.75	-6.75287	0.00994219	0	-3.86883	1	1
Solyc01g014270	SL3.0ch01	11888252	11890252	+	889	48	849	71	94.877	92.283	-2.59466	0.0410933	0.0413609	4.38718	0.893598	1
Solyc01g014375	SL3.0ch01	12645746	12647746	-	530	632	401	659	45.611	37.83	-7.78083	0.000783804	0.623536	0.367227	0.385297	1
Solyc01g014520	SL3.0ch01	13958600	13960600	+	412	33	398	70	92.584	85.043	-7.54153	0.00118787	0	-3.57627	1	1
Solyc01g014647	SL3.0ch01	14412647	14414647	+	970	78	635	75	92.557	89.437	-3.12063	0.0437034	0	-3.91086	1	1
Solyc01g014700	SL3.0ch01	14459666	14461666	-	1300	137	1111	214	90.466	83.849	-6.61719	1.77334e-06	1.45801	-0.447603	0.298351	1
Solyc01g014730	SL3.0ch01	14717876	14719876	-	135	65	94	86	67.5	52.222	-15.2778	0.00805889	0	-3.87049	1	1
Solyc01g014860	SL3.0ch01	15523898	15525898	-	885	118	759	147	88.235	83.775	-4.46046	0.0122956	0.361954	1.53387	0.450228	1
Solyc01g014940	SL3.0ch01	15955704	15957704	-	106	32	106	81	76.812	56.684	-20.1271	0.000622782	0	-3.91086	1	1
Solyc01g014960	SL3.0ch01	16130252	16132252	+	992	117	710	155	89.45	82.081	-7.36903	1.68371e-05	0	-3.91086	1	1
Solyc01g014970	SL3.0ch01	16265500	16267500	-	258	282	156	259	47.778	37.59	-10.1874	0.00525856	0	-3.91086	1	1
Solyc01g015050	SL3.0ch01	16660683	16662683	+	1011	82	845	101	92.498	89.323	-3.17425	0.0256497	0	-3.91086	1	1
Solyc01g015085	SL3.0ch01	16741535	16743535	+	1068	268	839	444	79.94	65.394	-14.5465	1.43645e-15	0	-3.91086	1	1
Solyc01g015180	SL3.0ch01	17385760	17387760	-	511	65	432	88	88.715	83.077	-5.63835	0.0184867	0	-3.91086	1	1
Solyc01g015210	SL3.0ch01	17827380	17829380	+	1078	72	726	72	93.739	90.977	-2.76169	0.047105	0	-3.91086	1	1
Solyc01g015280	SL3.0ch01	18298120	18300120	+	721	108	516	109	86.972	82.56	-4.41226	0.0382574	0	-3.91086	1	1
Solyc01g016410	SL3.0ch01	19418172	19420172	-	1925	226	1925	318	89.493	85.823	-3.6707	0.0008747	0.327782	4.66337	0.326454	1
Solyc01g016455	SL3.0ch01	19933831	19935831	-	240	16	278	38	93.75	87.975	-5.77532	0.038227	-4.74253	2.55628	4.6921e-09	3.22744e-06
Solyc01g016550	SL3.0ch01	20424155	20426155	-	848	59	407	181	93.495	69.218	-24.2774	3.338e-33	1.95247	-3.74789	1	1
Solyc01g016720	SL3.0ch01	21668327	21670327	-	895	112	764	198	88.878	79.418	-9.45998	9.95849e-08	5.88683	-3.11431	0.0104051	0.485901
Solyc01g016740	SL3.0ch01	21885371	21887371	-	1076	109	1003	142	90.802	87.598	-3.20343	0.0262878	0	-3.91086	1	1
Solyc01g016850	SL3.0ch01	22483220	22485220	-	288	22	188	50	92.903	78.992	-13.9116	1.70851e-05	0	-3.91086	1	1
Solyc01g016890	SL3.0ch01	22665080	22667080	+	442	45	267	51	90.76	83.962	-6.79749	0.0120287	0	-3.91086	1	1
Solyc01g017563	SL3.0ch01	24034632	24036632	-	388	134	282	139	74.33	66.983	-7.34613	0.0275393	0	-3.91086	1	1
Solyc01g017670	SL3.0ch01	24644451	24646451	-	856	80	707	127	91.453	84.772	-6.68081	7.88743e-05	0	-3.91086	1	1
Solyc01g017710	SL3.0ch01	24811699	24813699	+	504	364	556	723	58.065	43.471	-14.5931	5.62025e-10	1.55796	-2.4243	0.447025	1
Solyc01g017720	SL3.0ch01	24827942	24829942	+	548	143	476	199	79.305	70.519	-8.78684	0.000811946	-0.111911	-1.79897	1	1
Solyc01g017760	SL3.0ch01	25265339	25267339	+	1094	104	826	188	91.319	81.46	-9.8593	1.55564e-10	1.78814	-3.87428	1	1
Solyc01g017775	SL3.0ch01	25304903	25306903	-	741	61	640	89	92.394	87.791	-4.60252	0.0066682	0	-3.91086	1	1
Solyc01g017797	SL3.0ch01	25461329	25463329	+	473	38	481	77	92.564	86.201	-6.36288	0.00236668	0	-3.91086	1	1
Solyc01g020150	SL3.0ch01	27720863	27722863	+	124	82	1	43	60.194	2.273	-57.9214	1.53532e-12	0.698894	-1.53464	0.39672	1
Solyc01g020290	SL3.0ch01	28846840	28848840	+	718	70	541	95	91.117	85.063	-6.05386	0.00149949	0	-3.91086	1	1
Solyc01g020376	SL3.0ch01	29558526	29560526	-	1344	77	1134	110	94.581	91.158	-3.42372	0.00193843	0	-3.91086	1	1
Solyc01g020378	SL3.0ch01	29896586	29898586	-	244	659	94	580	27.021	13.947	-13.0745	3.71476e-09	-2.56979	-1.23714	0.0902319	1
Solyc01g020400	SL3.0ch01	29896467	29898467	+	199	678	94	599	22.691	13.564	-9.12678	2.04106e-05	0	-3.91086	1	1
Solyc01g021675	SL3.0ch01	32440879	32442879	+	859	26	890	53	97.062	94.38	-2.68251	0.0126227	0.158331	5.34877	0.625993	1
Solyc01g022750	SL3.0ch01	32846171	32848171	-	2253	123	2324	179	94.823	92.849	-1.97465	0.0103033	-0.165158	5.92716	0.652785	1
Solyc01g034020	SL3.0ch01	35378752	35380752	-	1491	362	1118	384	80.464	74.434	-6.03002	0.000161776	0.0799369	6.56074	0.774613	1
Solyc01g028980	SL3.0ch01	39013065	39015065	+	1528	144	1540	209	91.388	88.05	-3.33725	0.00384843	0	-3.91086	1	1
Solyc01g028870	SL3.0ch01	40946144	40948144	-	838	19	628	28	97.783	95.732	-2.05126	0.0438292	-0.330294	5.27985	0.227206	1
Solyc01g028840	SL3.0ch01	41101706	41103706	-	862	62	712	98	93.29	87.901	-5.38881	0.000484923	0	-3.91086	1	1
Solyc01g044270	SL3.0ch01	42996916	42998916	+	239	161	126	123	59.75	50.602	-9.14759	0.0409714	0.257109	4.50661	0.457023	1
Solyc01g044372	SL3.0ch01	43240464	43242464	-	1427	115	1287	142	92.542	90.063	-2.47917	0.0345259	0.879676	-0.473421	0.237319	1
Solyc01g049685	SL3.0ch01	45792778	45794778	-	1007	239	1065	381	80.819	73.651	-7.16717	5.49965e-05	0	-3.82789	1	1
Solyc01g049690	SL3.0ch01	45793026	45795026	-	1295	211	1265	311	85.989	80.266	-5.72288	0.000111998	0.194011	3.20886	0.607047	1
Solyc01g049840	SL3.0ch01	46574317	46576317	-	298	186	198	176	61.57	52.941	-8.62907	0.0243198	-1.8313	-2.13752	0.418097	1
Solyc01g049845	SL3.0ch01	46595576	46597576	+	1279	58	1102	132	95.662	89.303	-6.35885	7.44507e-09	0	-3.91086	1	1
Solyc01g049880	SL3.0ch01	46641245	46643245	-	331	453	203	369	42.219	35.49	-6.72988	0.0261474	-0.699112	2.6559	0.233958	1
Solyc01g049910	SL3.0ch01	47073063	47075063	-	1272	29	1224	62	97.771	95.179	-2.5921	0.001296	0.0966276	2.47958	0.83755	1
Solyc01g049914	SL3.0ch01	47073063	47075063	-	1272	29	1224	62	97.771	95.179	-2.5921	0.001296	0	-3.91086	1	1
Solyc01g049960	SL3.0ch01	47627525	47629525	-	2852	79	2262	141	97.305	94.132	-3.17234	9.42755e-08	-0.114768	5.45723	0.663992	1
Solyc01g056310	SL3.0ch01	53284166	53286166	+	697	437	424	419	61.464	50.297	-11.1673	5.96449e-06	0	-3.91086	1	1
Solyc01g056400	SL3.0ch01	54079769	54081769	+	388	38	277	46	91.08	85.759	-5.3213	0.0453618	0	-3.91086	1	1
Solyc01g056420	SL3.0ch01	54106337	54108337	-	211	35	284	104	85.772	73.196	-12.5765	0.000654738	0	-3.91086	1	1
Solyc01g056455	SL3.0ch01	54290285	54292285	-	388	51	380	87	88.383	81.37	-7.01224	0.00971357	0	-3.91086	1	1
Solyc01g056655	SL3.0ch01	55351819	55353819	+	445	97	550	201	82.103	73.236	-8.86764	0.000666677	0	-3.91086	1	1
Solyc01g056690	SL3.0ch01	55929996	55931996	-	1410	153	1437	233	90.211	86.048	-4.16323	0.000966611	-0.0286112	4.36998	0.922076	1
Solyc01g056850	SL3.0ch01	56987295	56989295	-	414	1294	238	1265	24.239	15.835	-8.40388	3.72287e-08	-0.997032	4.8358	0.185268	1
Solyc01g056900	SL3.0ch01	57395445	57397445	+	707	82	734	121	89.607	85.848	-3.75914	0.0426679	2.70463	-3.83362	0.671745	1
Solyc01g056910	SL3.0ch01	57395771	57397771	+	748	91	807	139	89.154	85.307	-3.8472	0.0307258	1.81767	-3.55801	1	1
Solyc01g056950	SL3.0ch01	57635808	57637808	-	817	83	533	96	90.778	84.738	-6.0401	0.00124223	0	-3.91086	1	1
Solyc01g057080	SL3.0ch01	58284435	58286435	-	774	551	710	607	58.415	53.91	-4.50469	0.0375762	0.0074754	-2.43168	1	1
Solyc01g057160	SL3.0ch01	59346768	59348768	+	74	1214	43	1135	5.745	3.65	-2.09509	0.0328057	-0.395263	-2.02921	0.860375	1
Solyc01g057280	SL3.0ch01	60315327	60317327	-	807	77	780	106	91.29	88.036	-3.25348	0.048749	1.01228	-0.140308	0.234505	1
Solyc01g057330	SL3.0ch01	60490094	60492094	+	222	254	194	307	46.639	38.723	-7.9161	0.0271139	-0.573199	-3.21283	1	1
Solyc01g057420	SL3.0ch01	60874629	60876629	-	1143	75	1011	104	93.842	90.673	-3.16972	0.0115357	0	-3.91086	1	1
Solyc01g057460	SL3.0ch01	60979001	60981001	+	1614	124	1232	321	92.865	79.33	-13.535	2.0036e-28	0.666054	4.86431	0.0481493	0.994919
Solyc01g057470	SL3.0ch01	61021777	61023777	-	30	590	7	494	4.839	1.397	-3.4415	0.00345342	0	-3.91086	1	1
Solyc01g057473	SL3.0ch01	61022051	61024051	+	59	672	17	551	8.071	2.993	-5.07818	0.000441856	-0.174738	2.51189	0.670367	1
Solyc01g057490	SL3.0ch01	61051966	61053966	+	198	92	212	169	68.276	55.643	-12.6328	0.00306504	0.732103	1.36957	0.175101	1
Solyc01g057510	SL3.0ch01	61227445	61229445	+	1390	79	1386	127	94.622	91.606	-3.01611	0.00405677	0	-3.87049	1	1
Solyc01g057690	SL3.0ch01	63471588	63473588	-	642	83	419	92	88.552	81.996	-6.55564	0.00443228	0	-3.87049	1	1
Solyc01g057760	SL3.0ch01	63608761	63610761	+	1318	129	1199	238	91.085	83.438	-7.64729	7.78409e-09	0.439794	5.34086	0.195592	1
Solyc01g057920	SL3.0ch01	64503173	64505173	-	669	399	440	376	62.64	53.922	-8.71888	0.000599631	0	-3.91086	1	1
Solyc01g057960	SL3.0ch01	64630623	64632623	+	356	513	118	499	40.967	19.125	-21.8418	5.19949e-18	0	-3.76338	1	1
Solyc01g057990	SL3.0ch01	64658825	64660825	+	1039	77	929	140	93.1	86.904	-6.19671	9.0214e-06	0	-3.91086	1	1
Solyc01g058000	SL3.0ch01	64675599	64677599	-	413	32	350	51	92.809	87.282	-5.52719	0.0167082	0	-3.91086	1	1
Solyc01g058040	SL3.0ch01	64965082	64967082	-	514	698	268	685	42.409	28.122	-14.2875	1.05344e-10	0	-3.91086	1	1
Solyc01g058080	SL3.0ch01	65008956	65010956	-	161	14	116	55	92	67.836	-24.1637	1.44632e-07	0	-3.91086	1	1
Solyc01g058120	SL3.0ch01	65192846	65194846	-	444	49	387	74	90.061	83.948	-6.11291	0.0118026	0	-3.91086	1	1
Solyc01g058280	SL3.0ch01	65887053	65889053	-	1809	332	1496	342	84.493	81.393	-3.10041	0.0202991	0.171072	4.99427	0.557343	1
Solyc01g058400	SL3.0ch01	66357491	66359491	+	958	669	773	719	58.881	51.81	-7.07173	0.000307714	0	-3.91086	1	1
Solyc01g058700	SL3.0ch01	67656464	67658464	-	1424	186	935	253	88.447	78.704	-9.7435	6.77077e-11	0	-3.91086	1	1
Solyc01g058740	SL3.0ch01	68166346	68168346	+	1523	124	1333	163	92.471	89.104	-3.36688	0.0035688	0	-3.91086	1	1
Solyc01g059920	SL3.0ch01	69263635	69265635	+	673	45	607	104	93.733	85.373	-8.35988	1.80928e-06	-0.299405	2.5463	0.507313	1
Solyc01g060080	SL3.0ch01	69524484	69526484	-	1187	65	1084	204	94.808	84.161	-10.6468	2.20924e-17	0.275657	5.32462	0.361443	1
Solyc01g060170	SL3.0ch01	69649355	69651355	-	1524	113	1548	183	93.097	89.428	-3.66905	0.000724699	0.143107	3.19938	0.830907	1
Solyc01g060270	SL3.0ch01	69913210	69915210	+	176	61	72	44	74.262	62.069	-12.1926	0.0442648	0	-3.76338	1	1
Solyc01g060280	SL3.0ch01	69917771	69919771	+	1398	241	1141	268	85.296	80.979	-4.31649	0.00431711	0.296901	5.19808	0.262716	1
Solyc01g060380	SL3.0ch01	70808739	70810739	-	781	69	439	100	91.882	81.447	-10.4352	1.15453e-07	2.62629	-3.75877	0.605764	1
Solyc01g060390	SL3.0ch01	70809201	70811201	-	264	29	56	98	90.102	36.364	-53.7388	1.33824e-30	-3.0415	-3.76582	0.487984	1
Solyc01g060400	SL3.0ch01	70809838	70811838	-	136	39	15	131	77.714	10.274	-67.4403	2.40437e-34	0	-3.91086	1	1
Solyc01g065510	SL3.0ch01	71591311	71593311	-	497	752	431	785	39.792	35.444	-4.34775	0.047268	0.29807	3.79469	0.526841	1
Solyc01g065573	SL3.0ch01	71761457	71763457	+	545	40	545	65	93.162	89.344	-3.81813	0.0426155	0	-3.91086	1	1
Solyc01g065597	SL3.0ch01	71776016	71778016	+	611	34	538	65	94.729	89.221	-5.50812	0.00117754	0	-3.83477	1	1
Solyc01g065700	SL3.0ch01	72104700	72106700	-	445	534	364	557	45.455	39.522	-5.93229	0.0196547	-3.70781	-2.98376	0.0711403	1
Solyc01g065710	SL3.0ch01	72117917	72119917	-	1423	53	1257	290	96.409	81.254	-15.1552	1.23326e-40	-0.250696	2.17758	0.590994	1
Solyc01g066070	SL3.0ch01	72856749	72858749	-	1932	338	1926	658	85.11	74.536	-10.5745	1.92257e-18	2.70462	-3.83362	0.671691	1
Solyc01g066080	SL3.0ch01	72876430	72878430	-	1035	89	852	104	92.082	89.121	-2.96051	0.0406406	-0.0908119	-3.3648	1	1
Solyc01g066150	SL3.0ch01	72983022	72985022	-	697	43	450	46	94.189	90.726	-3.46338	0.0431237	2.9527	-1.7739	0.101815	1
Solyc01g066190	SL3.0ch01	73107180	73109180	-	631	92	655	161	87.275	80.27	-7.00563	0.000899342	-4.01672	-0.992873	0.0314401	0.826266
Solyc01g066200	SL3.0ch01	73146246	73148246	-	1542	88	1390	116	94.601	92.297	-2.30375	0.0192486	0.354795	-0.78437	0.801078	1
Solyc01g066207	SL3.0ch01	73489420	73491420	-	498	46	483	78	91.544	86.096	-5.44786	0.0101373	0	-3.91086	1	1
Solyc01g066280	SL3.0ch01	73624883	73626883	-	527	114	358	154	82.215	69.922	-12.2934	7.69552e-06	0	-3.91086	1	1
Solyc01g066330	SL3.0ch01	73924755	73926755	+	345	33	296	68	91.27	81.319	-9.95116	0.000409356	0	-3.91086	1	1
Solyc01g066453	SL3.0ch01	74228544	74230544	+	289	382	204	395	43.07	34.057	-9.01328	0.00302301	-0.422218	2.71717	0.590803	1
Solyc01g066480	SL3.0ch01	74298379	74300379	-	232	421	173	432	35.528	28.595	-6.93329	0.0197285	-0.126108	5.28242	0.66683	1
Solyc01g066680	SL3.0ch01	74663714	74665714	-	1197	276	1141	340	81.263	77.043	-4.22019	0.0116122	0	-3.71418	1	1
Solyc01g066795	SL3.0ch01	74800137	74802137	-	1796	562	1582	607	76.166	72.27	-3.8958	0.00715208	0	-3.91086	1	1
Solyc01g066800	SL3.0ch01	74800266	74802266	-	1875	569	1652	614	76.718	72.904	-3.8147	0.00707063	0	-3.91086	1	1
Solyc01g067103	SL3.0ch01	75286546	75288546	-	325	553	257	641	37.016	28.619	-8.39679	0.00068076	0.399788	4.81545	0.419704	1
Solyc01g067107	SL3.0ch01	75287906	75289906	-	777	191	724	252	80.269	74.18	-6.08827	0.00402863	0.953754	-0.14667	0.298618	1
Solyc01g067165	SL3.0ch01	75384580	75386580	+	543	28	408	46	95.096	89.868	-5.22848	0.0042446	-0.553941	-0.226286	0.484953	1
Solyc01g067295	SL3.0ch01	75556255	75558255	-	667	141	519	163	82.55	76.1	-6.4498	0.00628163	-2.18494	-0.28134	0.037308	0.898609
Solyc01g067510	SL3.0ch01	76050825	76052825	+	1878	605	1511	575	75.634	72.435	-3.19903	0.0282084	-1.36842	2.06056	0.195077	1
Solyc01g067530	SL3.0ch01	76083055	76085055	+	851	261	696	360	76.529	65.909	-10.6197	4.85803e-07	-0.249916	5.39089	0.549855	1
Solyc01g067550	SL3.0ch01	76119659	76121659	-	648	533	408	547	54.869	42.723	-12.1462	2.2672e-07	0.138846	5.75344	0.667897	1
Solyc01g067720	SL3.0ch01	76474226	76476226	-	2021	669	1793	741	75.13	70.758	-4.37242	0.00128939	0.148805	5.27692	0.608736	1
Solyc01g067860	SL3.0ch01	76648640	76650640	+	858	703	583	725	54.965	44.572	-10.3929	3.10239e-07	0	-3.91086	1	1
Solyc01g067880	SL3.0ch01	76673122	76675122	+	449	219	419	265	67.216	61.257	-5.95826	0.0413764	0	-3.91086	1	1
Solyc01g067930	SL3.0ch01	76750473	76752473	+	767	570	536	561	57.367	48.861	-8.50671	0.000144398	0.122473	4.99104	0.794621	1
Solyc01g068010	SL3.0ch01	76869045	76871045	+	1088	51	1002	192	95.522	83.92	-11.6028	2.42365e-19	0	-3.91086	1	1
Solyc01g068100	SL3.0ch01	77013470	77015470	-	618	597	490	692	50.864	41.455	-9.40904	2.54677e-05	0.216408	8.06111	0.498284	1
Solyc01g068120	SL3.0ch01	77041874	77043874	+	769	456	634	510	62.776	55.42	-7.35593	0.00097671	-2.43873	-3.62421	0.451487	1
Solyc01g068130	SL3.0ch01	77051726	77053726	-	1641	295	1381	329	84.762	80.76	-4.00216	0.00422598	-0.157323	5.63861	0.681205	1
Solyc01g068210	SL3.0ch01	77113618	77115618	+	586	663	456	672	46.918	40.426	-6.492	0.00458607	-0.165973	5.78666	0.558458	1
Solyc01g068250	SL3.0ch01	77181381	77183381	-	1833	856	1743	945	68.167	64.844	-3.32285	0.0210232	1.07579	-0.672181	0.373516	1
Solyc01g068267	SL3.0ch01	77201717	77203717	-	1349	515	1131	538	72.371	67.765	-4.60612	0.00726183	1.41539	0.183461	0.141582	1
Solyc01g068270	SL3.0ch01	77217325	77219325	+	1347	1065	878	812	55.846	51.953	-3.89311	0.0276662	0.00611905	5.41957	0.987402	1
Solyc01g068475	SL3.0ch01	77527143	77529143	-	1391	424	1059	482	76.639	68.722	-7.91751	2.30096e-06	0.0207701	2.0071	0.963989	1
Solyc01g068510	SL3.0ch01	77564502	77566502	-	45	19	37	38	70.313	49.333	-20.9792	0.0296844	0	-2.75233	1	1
Solyc01g079060	SL3.0ch01	77990076	77992076	+	1142	87	1061	131	92.921	89.01	-3.91101	0.00252063	-0.0716463	3.79997	0.820875	1
Solyc01g079080	SL3.0ch01	78014646	78016646	-	1834	311	1684	359	85.501	82.428	-3.07336	0.0153817	0.258281	0.0694692	0.782128	1
Solyc01g079110	SL3.0ch01	78028555	78030555	+	17	116	0	106	12.782	0	-12.782	0.000185717	0.031184	3.82085	0.967996	1
Solyc01g079220	SL3.0ch01	78170610	78172610	-	1512	91	1298	173	94.323	88.239	-6.08385	2.41392e-08	-0.206985	4.40827	0.575407	1
Solyc01g079270	SL3.0ch01	78220427	78222427	-	826	384	524	424	68.264	55.274	-12.9902	9.32427e-09	0	-3.91086	1	1
Solyc01g079290	SL3.0ch01	78233616	78235616	-	512	375	406	433	57.723	48.391	-9.33172	0.00045153	1.30213	-0.241144	0.102516	1
Solyc01g079320	SL3.0ch01	78256312	78258312	-	1166	73	1001	104	94.108	90.588	-3.51992	0.00463129	0.00494634	3.09088	0.993249	1
Solyc01g079340	SL3.0ch01	78291873	78293873	+	1403	395	1209	426	78.031	73.945	-4.08619	0.0129892	-0.249201	5.02297	0.377291	1
Solyc01g079360	SL3.0ch01	78311913	78313913	-	758	747	507	632	50.365	44.513	-5.85272	0.00797085	-0.340264	3.07487	0.414777	1
Solyc01g079520	SL3.0ch01	78439675	78441675	+	750	435	618	488	63.291	55.877	-7.4141	0.00118016	-0.0192331	2.46555	0.974928	1
Solyc01g079640	SL3.0ch01	78621044	78623044	-	2637	231	2479	319	91.946	88.599	-3.34661	0.000114197	-0.0867038	0.410898	0.909675	1
Solyc01g079650	SL3.0ch01	78631307	78633307	+	642	567	502	625	53.102	44.543	-8.5587	0.000185522	0.344092	4.3406	0.301105	1
Solyc01g079680	SL3.0ch01	78653395	78655395	+	441	590	238	538	42.774	30.67	-12.1039	1.16396e-06	0.460443	0.313806	0.52374	1
Solyc01g079700	SL3.0ch01	78674648	78676648	-	622	372	439	346	62.575	55.924	-6.65189	0.0111905	0.134994	-1.10804	0.905467	1
Solyc01g079780	SL3.0ch01	78781473	78783473	-	208	615	138	548	25.273	20.117	-5.15677	0.0356772	0.523687	-0.512152	0.505788	1
Solyc01g079800	SL3.0ch01	78793725	78795725	-	1707	163	1211	258	91.283	82.437	-8.84639	7.33875e-13	0.107011	2.73683	0.81051	1
Solyc01g079850	SL3.0ch01	78840518	78842518	-	715	785	571	831	47.667	40.728	-6.93913	0.000689204	-1.10086	-1.13696	0.333075	1
Solyc01g079870	SL3.0ch01	78866653	78868653	-	981	950	733	865	50.803	45.87	-4.93286	0.00888018	0.241199	7.12117	0.362062	1
Solyc01g079910	SL3.0ch01	78934413	78936413	-	65	126	46	155	34.031	22.886	-11.1458	0.0341398	0	-3.91086	1	1
Solyc01g079940	SL3.0ch01	78952701	78954701	-	501	405	350	421	55.298	45.396	-9.90242	0.000252219	-0.382909	1.52521	0.726419	1
Solyc01g080050	SL3.0ch01	79024098	79026098	+	856	39	691	62	95.642	91.766	-3.87619	0.00375351	0	-3.457	1	1
Solyc01g080120	SL3.0ch01	79133350	79135350	-	796	604	717	643	56.857	52.721	-4.13655	0.0496631	-1.65888	-2.65834	0.378497	1
Solyc01g080130	SL3.0ch01	79140332	79142332	-	991	721	894	805	57.886	52.619	-5.26633	0.00577706	-0.266662	4.30854	0.44994	1
Solyc01g080170	SL3.0ch01	79238127	79240127	+	1431	293	1205	301	83.005	80.013	-2.99136	0.0491948	-0.155877	4.80005	0.604742	1
Solyc01g080180	SL3.0ch01	79248510	79250510	+	329	415	175	389	44.22	31.028	-13.1921	8.93446e-06	0.078793	2.77329	0.849372	1
Solyc01g080250	SL3.0ch01	79335921	79337921	-	2271	358	2142	402	86.383	84.198	-2.18454	0.0476456	0.0159918	6.4559	0.952473	1
Solyc01g080330	SL3.0ch01	79409842	79411842	+	1180	469	993	499	71.559	66.555	-5.00356	0.00659803	0.148791	8.28368	0.577201	1
Solyc01g080380	SL3.0ch01	79477692	79479692	+	596	392	433	454	60.324	48.816	-11.5077	4.48462e-06	1.11147	-2.93896	0.707	1
Solyc01g080490	SL3.0ch01	79577256	79579256	-	233	484	134	505	32.497	20.97	-11.5262	1.10151e-05	4.56901	-2.99075	0.0861563	1
Solyc01g080550	SL3.0ch01	79656033	79658033	-	1160	124	971	221	90.343	81.46	-8.88295	2.43594e-09	-2.05764	-3.1831	0.402542	1
Solyc01g080725	SL3.0ch01	79830867	79832867	-	716	197	500	226	78.423	68.871	-9.55226	7.665e-05	0	-3.91086	1	1
Solyc01g080780	SL3.0ch01	79868181	79870181	+	755	90	653	112	89.349	85.359	-3.98964	0.0306289	-0.126165	3.77512	0.74818	1
Solyc01g080783	SL3.0ch01	79896249	79898249	-	1126	116	774	115	90.66	87.064	-3.59611	0.018974	0	-3.91086	1	1
Solyc01g080787	SL3.0ch01	79907762	79909762	+	451	28	398	44	94.154	90.045	-4.10924	0.0458074	0	-3.91086	1	1
Solyc01g080790	SL3.0ch01	79921362	79923362	-	1009	194	681	250	83.874	73.147	-10.7265	2.2821e-08	0	-3.91086	1	1
Solyc01g080800	SL3.0ch01	79933414	79935414	-	1018	694	896	740	59.463	54.768	-4.69489	0.0144046	0	-3.38591	1	1
Solyc01g080810	SL3.0ch01	79942613	79944613	+	1349	66	1224	102	95.336	92.308	-3.028	0.00310699	-0.331675	4.7808	0.312248	1
Solyc01g080820	SL3.0ch01	79966842	79968842	+	44	96	55	276	31.429	16.616	-14.8123	0.00161733	0	-3.83608	1	1
Solyc01g081040	SL3.0ch01	80205062	80207062	+	546	641	260	626	45.998	29.345	-16.6529	2.54992e-13	-1.8233	-3.06191	0.631138	1
Solyc01g081060	SL3.0ch01	80240849	80242849	+	465	1334	339	1204	25.848	21.97	-3.87751	0.0196981	0.79332	9.20955	0.0879532	1
Solyc01g081080	SL3.0ch01	80281965	80283965	-	413	788	336	950	34.388	26.128	-8.26048	4.37341e-05	0	-3.91086	1	1
Solyc01g081110	SL3.0ch01	80300423	80302423	-	156	80	107	131	66.102	44.958	-21.1437	2.21428e-05	-0.369534	0.6208	0.503753	1
Solyc01g081100	SL3.0ch01	80292911	80294911	-	1232	469	889	431	72.428	67.348	-5.0795	0.00678216	0	-3.91086	1	1
Solyc01g081150	SL3.0ch01	80322153	80324153	-	1435	96	1621	201	93.73	88.968	-4.76142	8.25025e-06	0.0875849	6.0764	0.768575	1
Solyc01g081210	SL3.0ch01	80352136	80354136	-	2055	321	2104	476	86.49	81.55	-4.93951	1.40225e-05	-3.70715	-3.2281	0.0517902	1
Solyc01g081340	SL3.0ch01	80431721	80433721	+	2673	556	2339	712	82.781	76.663	-6.11766	2.01766e-08	3.92151	-3.16674	0.308834	1
Solyc01g081360	SL3.0ch01	80441511	80443511	+	1526	307	1127	328	83.252	77.457	-5.79446	0.00015939	0	-3.91086	1	1
Solyc01g081410	SL3.0ch01	80468854	80470854	-	1405	488	1475	680	74.221	68.445	-5.77534	0.000239397	-0.642829	1.63649	0.230385	1
Solyc01g081420	SL3.0ch01	80468995	80470995	+	1395	487	1456	601	74.123	70.783	-3.34058	0.0371413	1.67451	1.55693	0.0581977	1
Solyc01g081440	SL3.0ch01	80505752	80507752	-	670	600	584	688	52.756	45.912	-6.84396	0.00203682	0.411927	3.9242	0.2577	1
Solyc01g081510	SL3.0ch01	80561001	80563001	+	1544	257	1427	319	85.73	81.73	-4.00048	0.00403004	0.081662	3.28701	0.836481	1
Solyc01g081520	SL3.0ch01	80577140	80579140	-	717	303	258	206	70.294	55.603	-14.6907	4.50062e-07	-0.0532933	5.94881	0.837807	1
Solyc01g081630	SL3.0ch01	80678640	80680640	+	69	469	30	462	12.825	6.098	-6.72772	0.00101606	0	-3.86962	1	1
Solyc01g081640	SL3.0ch01	80690362	80692362	-	488	865	394	844	36.068	31.826	-4.24247	0.0437576	-0.335504	-2.20332	0.772834	1
Solyc01g073700	SL3.0ch01	80956511	80958511	-	282	481	84	561	36.959	13.023	-23.9361	1.42924e-23	0	-3.91086	1	1
Solyc01g073730	SL3.0ch01	80987627	80989627	-	1209	523	1038	641	69.804	61.823	-7.98118	6.03592e-06	-0.0422117	3.45594	0.906655	1
Solyc01g073780	SL3.0ch01	81038206	81040206	-	425	333	262	347	56.069	43.021	-13.0473	1.05621e-05	0	-3.69406	1	1
Solyc01g073910	SL3.0ch01	81129116	81131116	+	383	865	220	876	30.689	20.073	-10.6161	4.23538e-08	0.962239	1.51095	0.356953	1
Solyc01g074020	SL3.0ch01	81222222	81224222	+	33	390	16	401	7.801	3.837	-3.96449	0.0334022	0.679824	3.32389	0.0561232	1
Solyc01g074030	SL3.0ch01	81238991	81240991	+	487	764	446	838	38.929	34.735	-4.19365	0.0493882	-0.0116641	4.21645	0.990632	1
Solyc01g074050	SL3.0ch01	81259863	81261863	+	755	553	545	542	57.722	50.138	-7.58372	0.000772361	0	-3.91086	1	1
Solyc01g074060	SL3.0ch01	81261089	81263089	+	583	251	402	296	69.904	57.593	-12.311	4.32293e-06	0	-3.91086	1	1
Solyc01g086670	SL3.0ch01	81509474	81511474	-	1728	1079	1403	1008	61.56	58.192	-3.36876	0.0267586	0.917793	4.5299	0.41485	1
Solyc01g086720	SL3.0ch01	81555502	81557502	-	763	214	604	223	78.096	73.035	-5.06115	0.0258594	-1.97377	-0.766574	0.019286	0.661164
Solyc01g086750	SL3.0ch01	81592053	81594053	-	2112	135	2039	271	93.992	88.268	-5.72359	1.51254e-10	0.202167	6.94739	0.492896	1
Solyc01g086780	SL3.0ch01	81611075	81613075	+	253	393	220	488	39.164	31.073	-8.09064	0.00549296	3.2186	-3.79652	0.528157	1
Solyc01g086960	SL3.0ch01	81750914	81752914	-	1012	372	707	678	73.121	51.047	-22.0745	2.85321e-31	0.44319	8.87499	0.192154	1
Solyc01g086980	SL3.0ch01	81770134	81772134	+	1857	678	1542	755	73.254	67.131	-6.1234	2.07869e-05	0.159373	5.42747	0.558333	1
Solyc01g087003	SL3.0ch01	81805774	81807774	-	177	169	142	205	51.156	40.922	-10.2339	0.0166377	0.436693	0.535414	0.450578	1
Solyc01g087007	SL3.0ch01	81806548	81808548	-	612	295	473	293	67.475	61.749	-5.72585	0.0300608	0.226525	-0.58843	0.744032	1
Solyc01g087020	SL3.0ch01	81815981	81817981	+	1137	453	1101	544	71.509	66.93	-4.57934	0.0113404	0.572909	6.84875	0.178825	1
Solyc01g087040	SL3.0ch01	81838925	81840925	+	854	519	782	606	62.2	56.34	-5.85951	0.00523883	-1.34526	3.18908	0.00510132	0.320112
Solyc01g087070	SL3.0ch01	81890250	81892250	-	494	361	338	356	57.778	48.703	-9.07461	0.00136789	0.243631	2.79942	0.717375	1
Solyc01g087120	SL3.0ch01	81913103	81915103	+	67	300	21	228	18.256	8.434	-9.8224	0.00196236	-0.156884	7.8888	0.570338	1
Solyc01g087140	SL3.0ch01	81941394	81943394	+	1221	716	1093	846	63.036	56.369	-6.66636	0.000115167	-1.91429	-3.87151	1	1
Solyc01g087150	SL3.0ch01	81957568	81959568	+	1621	523	1351	609	75.606	68.929	-6.67777	1.21923e-05	-0.049224	-2.10677	1	1
Solyc01g087200	SL3.0ch01	82007408	82009408	-	44	29	23	36	60.274	38.983	-21.2909	0.0401551	-0.521798	1.85555	0.41079	1
Solyc01g087240	SL3.0ch01	82051369	82053369	+	543	79	504	112	87.299	81.818	-5.48085	0.019554	0.0762395	5.16502	0.802262	1
Solyc01g087330	SL3.0ch01	82162401	82164401	-	270	164	189	187	62.212	50.266	-11.946	0.00205989	-0.38426	-0.035027	0.636211	1
Solyc01g087350	SL3.0ch01	82182185	82184185	-	2218	148	2032	185	93.745	91.655	-2.08933	0.0161481	0	-3.86959	1	1
Solyc01g087338	SL3.0ch01	82183803	82185803	+	1733	343	1558	376	83.478	80.558	-2.91941	0.0319229	-2.36206	-3.6267	0.379242	1
Solyc01g087360	SL3.0ch01	82188979	82190979	-	34	10	18	66	77.273	21.429	-55.8442	1.33943e-08	0.257162	-0.643044	1	1
Solyc01g087440	SL3.0ch01	82281931	82283931	+	1528	337	1313	380	81.93	77.555	-4.37566	0.00364178	-0.141634	-2.83514	1	1
Solyc01g087470	SL3.0ch01	82302262	82304262	+	1061	505	1109	643	67.752	63.299	-4.45315	0.0165882	-0.354911	1.88005	0.475211	1
Solyc01g087490	SL3.0ch01	82302262	82304262	+	1061	505	1109	643	67.752	63.299	-4.45315	0.0165882	1.84577	0.0317878	0.0659792	1
Solyc01g087510	SL3.0ch01	82333653	82335653	-	686	216	741	318	76.053	69.972	-6.08154	0.00687249	0	-3.91086	1	1
Solyc01g087550	SL3.0ch01	82367092	82369092	-	570	676	559	812	45.746	40.773	-4.97323	0.0231741	0.38891	5.39971	0.17583	1
Solyc01g087580	SL3.0ch01	82404440	82406440	-	1091	659	736	601	62.343	55.049	-7.29424	0.000212723	0.612124	5.79375	0.216292	1
Solyc01g087810	SL3.0ch01	82569870	82571870	+	792	387	465	368	67.176	55.822	-11.3532	1.98618e-06	2.36698	-0.708141	0.131925	1
Solyc01g087890	SL3.0ch01	82630518	82632518	+	1223	288	1101	430	80.94	71.914	-9.02599	4.81079e-08	0.0219257	5.86197	0.941668	1
Solyc01g087910	SL3.0ch01	82663948	82665948	-	695	217	520	287	76.206	64.436	-11.77	8.50563e-07	0.314772	4.33116	0.306476	1
Solyc01g087995	SL3.0ch01	82716398	82718398	-	167	31	120	43	84.343	73.62	-10.7238	0.025826	0.0905858	2.97932	0.823564	1
Solyc01g088000	SL3.0ch01	82721553	82723553	-	159	272	149	416	36.891	26.372	-10.5193	0.00139605	0.127304	3.76008	0.69627	1
Solyc01g088050	SL3.0ch01	82772932	82774932	+	739	774	473	697	48.843	40.427	-8.41601	7.24378e-05	0.154869	1.34201	0.809172	1
Solyc01g088120	SL3.0ch01	82861647	82863647	+	1003	81	952	202	92.528	82.496	-10.032	1.03013e-11	0.0815751	-2.79869	1	1
Solyc01g088180	SL3.0ch01	82916938	82918938	+	976	464	897	530	67.778	62.859	-4.91863	0.0136086	4.10277	-3.59887	0.166983	1
Solyc01g088280	SL3.0ch01	82950766	82952766	-	751	185	535	213	80.235	71.524	-8.71098	0.000148632	0	-3.91086	1	1
Solyc01g088323	SL3.0ch01	82992402	82994402	-	424	22	326	41	95.067	88.828	-6.23893	0.00394653	1.46212	-3.25106	0.793489	1
Solyc01g088330	SL3.0ch01	82992137	82994137	-	445	12	299	23	97.374	92.857	-4.51704	0.0102641	-1.66307	-3.5627	0.539093	1
Solyc01g088440	SL3.0ch01	83117253	83119253	-	573	484	388	465	54.21	45.487	-8.72351	0.000613702	0.180958	2.23485	0.731853	1
Solyc01g088460	SL3.0ch01	83134601	83136601	+	2649	262	2143	303	91	87.612	-3.38723	0.000292075	0	-3.91086	1	1
Solyc01g088500	SL3.0ch01	83151553	83153553	-	439	240	362	259	64.654	58.293	-6.36083	0.0355666	-0.231927	-2.26986	0.904633	1
Solyc01g088505	SL3.0ch01	83163614	83165614	-	767	597	636	642	56.232	49.765	-6.46641	0.00275564	-0.0439485	6.65537	0.86682	1
Solyc01g088610	SL3.0ch01	83247297	83249297	-	11	23	1	39	32.353	2.5	-29.8529	0.00245594	-0.560529	6.93689	0.11769	1
Solyc01g088710	SL3.0ch01	83347870	83349870	-	2144	238	1997	306	90.008	86.713	-3.29541	0.00147158	0.178667	4.54005	0.525628	1
Solyc01g088720	SL3.0ch01	83350275	83352275	+	1775	212	1395	231	89.331	85.793	-3.53729	0.00376891	0.568952	4.22243	0.182037	1
Solyc01g088730	SL3.0ch01	83373965	83375965	-	678	10	797	41	98.547	95.107	-3.43911	0.000592525	0.150741	5.55801	0.597975	1
Solyc01g088740	SL3.0ch01	83382810	83384810	-	816	465	764	532	63.7	58.951	-4.74962	0.0267079	0.304256	4.58988	0.269936	1
Solyc01g088750	SL3.0ch01	83389516	83391516	-	353	463	263	536	43.26	32.916	-10.3437	0.000101913	0.693517	2.18076	0.106319	1
Solyc01g088760	SL3.0ch01	83388260	83390260	+	402	508	263	536	44.176	32.916	-11.2597	1.39089e-05	0.578767	5.66555	0.137241	1
Solyc01g088810	SL3.0ch01	83414772	83416772	+	25	0	9	57	100	13.636	-86.3636	7.46467e-14	1.0348	1.46881	0.154188	1
Solyc01g088820	SL3.0ch01	83418739	83420739	+	1214	815	898	819	59.832	52.301	-7.53191	2.16714e-05	0.0431813	2.85683	0.91926	1
Solyc01g088830	SL3.0ch01	83424250	83426250	+	366	244	257	264	60	49.328	-10.6718	0.00134742	0.674728	-2.54205	0.79714	1
Solyc01g089950	SL3.0ch01	83523197	83525197	+	1703	376	1442	430	81.914	77.03	-4.88447	0.000569829	-0.385864	1.97119	0.45848	1
Solyc01g089990	SL3.0ch01	83585037	83587037	-	1268	830	628	718	60.439	46.657	-13.7818	5.83634e-14	1.13953	-3.26811	0.721711	1
Solyc01g090135	SL3.0ch01	83647132	83649132	-	11	0	13	18	100	41.935	-58.0645	0.00254707	0	-3.91086	1	1
Solyc01g090160	SL3.0ch01	83669649	83671649	-	289	419	247	470	40.819	34.449	-6.37012	0.02709	0.803552	-3.43711	1	1
Solyc01g090225	SL3.0ch01	83744465	83746465	-	1269	308	1115	337	80.469	76.791	-3.67861	0.0281655	0.288451	3.89423	0.400406	1
Solyc01g090270	SL3.0ch01	83809238	83811238	-	330	479	229	474	40.791	32.575	-8.21642	0.00326836	0.000291728	5.88588	0.999535	1
Solyc01g090300	SL3.0ch01	83837126	83839126	+	509	795	384	800	39.034	32.432	-6.60131	0.00218184	-1.52471	-2.0277	0.392896	1
Solyc01g090410	SL3.0ch01	83961063	83963063	+	696	874	578	921	44.331	38.559	-5.77217	0.00362717	-0.590597	-1.66288	0.539679	1
Solyc01g090425	SL3.0ch01	83982154	83984154	-	1010	66	832	86	93.866	90.632	-3.23436	0.0181387	0.380599	-0.0165658	0.679917	1
Solyc01g090510	SL3.0ch01	84050617	84052617	+	1468	201	1330	244	87.957	84.498	-3.45877	0.0115282	-0.244004	0.387646	0.730423	1
Solyc01g090515	SL3.0ch01	84052888	84054888	+	45	0	6	4	100	60	-40	0.00196581	0.0558249	0.190381	0.944578	1
Solyc01g090520	SL3.0ch01	84056023	84058023	+	945	309	768	323	75.359	70.394	-4.96472	0.0169229	4.23822	-3.68542	0.299828	1
Solyc01g090610	SL3.0ch01	84147863	84149863	+	1095	674	922	731	61.899	55.777	-6.122	0.00105006	0	-3.91086	1	1
Solyc01g090670	SL3.0ch01	84188725	84190725	+	1380	125	1296	199	91.694	86.689	-5.00539	5.23012e-05	0.0865775	4.50659	0.824601	1
Solyc01g090700	SL3.0ch01	84222407	84224407	-	3654	1531	3105	1502	70.473	67.397	-3.07508	0.00324347	0.186663	6.96707	0.546763	1
Solyc01g090800	SL3.0ch01	84381735	84383735	+	1047	543	756	557	65.849	57.578	-8.27099	3.2093e-05	0.803995	-2.87512	0.756313	1
Solyc01g090810	SL3.0ch01	84394604	84396604	+	293	625	269	738	31.917	26.713	-5.2042	0.0271139	5.98632	-0.54036	0.0408996	0.928674
Solyc01g090840	SL3.0ch01	84416643	84418643	+	399	454	307	471	46.776	39.46	-7.31593	0.00790554	0.369404	1.83736	0.646238	1
Solyc01g090860	SL3.0ch01	84442689	84444689	+	3278	227	2769	266	93.524	91.236	-2.28795	0.0016491	0.06177	5.20444	0.871453	1
Solyc01g090890	SL3.0ch01	84468110	84470110	+	256	655	213	755	28.101	22.004	-6.09686	0.0062174	-1.24703	0.894633	0.208253	1
Solyc01g090900	SL3.0ch01	84484367	84486367	+	718	279	601	340	72.016	63.868	-8.14782	0.000551668	0.338615	-1.94682	0.871613	1
Solyc01g090920	SL3.0ch01	84501286	84503286	-	1620	99	1318	113	94.241	92.103	-2.13741	0.034242	0.325633	2.75828	0.472478	1
Solyc01g090950	SL3.0ch01	84541050	84543050	-	72	388	25	390	15.652	6.024	-9.62808	2.7088e-05	-0.832975	4.10728	0.0169526	0.628351
Solyc01g091050	SL3.0ch01	84645695	84647695	-	504	693	395	867	42.105	31.3	-10.8057	2.77952e-07	0	-3.87283	1	1
Solyc01g091100	SL3.0ch01	84691079	84693079	-	372	848	278	885	30.492	23.904	-6.58811	0.00114678	1.83429	-2.16539	1	1
Solyc01g091130	SL3.0ch01	84714218	84716218	-	36	337	21	385	9.651	5.172	-4.47906	0.0350929	-0.207296	3.54359	0.610649	1
Solyc01g091145	SL3.0ch01	84723895	84725895	-	2090	423	1820	440	83.168	80.531	-2.63656	0.03583	0.279389	-1.13103	0.79475	1
Solyc01g091260	SL3.0ch01	84800943	84802943	-	52	141	0	41	26.943	0	-26.943	7.94705e-05	0.0676339	5.42978	0.878381	1
Solyc01g091310	SL3.0ch01	84823740	84825740	+	2640	176	1969	220	93.75	89.95	-3.80025	7.15926e-06	0.225021	5.75116	0.376721	1
Solyc01g091400	SL3.0ch01	84912068	84914068	-	551	524	393	590	51.256	39.98	-11.2762	2.52763e-06	0	-3.78486	1	1
Solyc01g091430	SL3.0ch01	84932973	84934973	-	99	25	87	58	79.839	60	-19.8387	0.00175903	-0.62401	0.480218	0.308567	1
Solyc01g091455	SL3.0ch01	84941106	84943106	+	2377	824	2063	834	74.258	71.212	-3.04645	0.0172868	0	-3.91086	1	1
Solyc01g091530	SL3.0ch01	85025737	85027737	-	668	378	508	407	63.862	55.519	-8.34321	0.00068344	-0.611605	7.31667	0.262157	1
Solyc01g091600	SL3.0ch01	85064242	85066242	-	974	1018	893	1160	48.896	43.497	-5.39826	0.00188426	0.254414	4.91994	0.356719	1
Solyc01g091610	SL3.0ch01	85065154	85067154	+	803	873	539	1203	47.912	30.941	-16.9702	1.61666e-22	-0.351265	0.987557	0.566896	1
Solyc01g091650	SL3.0ch01	85124563	85126563	-	1072	637	768	681	62.727	53.002	-9.72467	3.23015e-07	-0.0288018	6.01109	0.910781	1
Solyc01g091690	SL3.0ch01	85150533	85152533	-	389	926	318	930	29.582	25.481	-4.10098	0.0387326	0.22188	7.92916	0.454341	1
Solyc01g091740	SL3.0ch01	85204194	85206194	-	935	332	784	362	73.796	68.412	-5.3845	0.00953892	0.00983401	5.0601	0.979671	1
Solyc01g091800	SL3.0ch01	85240379	85242379	-	23	58	5	63	28.395	7.353	-21.0421	0.00374754	-0.81479	3.10464	0.0527183	1
Solyc01g091840	SL3.0ch01	85264972	85266972	+	533	598	439	618	47.126	41.533	-5.5938	0.018448	0.193458	3.49773	0.735154	1
Solyc01g093980	SL3.0ch01	85429781	85431781	+	84	529	53	505	13.703	9.498	-4.20489	0.0489047	0.391896	0.126215	0.570606	1
Solyc01g094000	SL3.0ch01	85456728	85458728	-	1403	226	1190	249	86.126	82.696	-3.43014	0.0195692	-0.0268273	6.0979	0.92188	1
Solyc01g094010	SL3.0ch01	85460479	85462479	-	739	513	679	581	59.026	53.889	-5.13667	0.0208213	-0.200972	2.05404	0.70868	1
Solyc01g094020	SL3.0ch01	85468008	85470008	-	487	925	390	893	34.49	30.398	-4.09258	0.0418881	-0.373161	3.39839	0.46106	1
Solyc01g094080	SL3.0ch01	85537783	85539783	-	1391	167	1091	244	89.281	81.723	-7.55828	7.10319e-08	-0.0491995	4.70804	0.8858	1
Solyc01g094100	SL3.0ch01	85558171	85560171	-	264	92	23	42	74.157	35.385	-38.7727	4.04795e-08	-4.9367	-3.00262	0.027696	0.784969
Solyc01g094110	SL3.0ch01	85561389	85563389	-	936	289	494	253	76.408	66.131	-10.277	6.49607e-06	0	-3.87283	1	1
Solyc01g094280	SL3.0ch01	85694355	85696355	-	53	87	0	22	37.857	0	-37.8571	0.000467866	0.0563672	4.75515	0.86683	1
Solyc01g094300	SL3.0ch01	85708426	85710426	-	1001	912	808	993	52.326	44.864	-7.46222	3.2749e-05	0	-3.91086	1	1
Solyc01g094310	SL3.0ch01	85708760	85710760	-	1163	1062	968	1081	52.27	47.243	-5.02711	0.00311326	0	-3.91086	1	1
Solyc01g094320	SL3.0ch01	85717860	85719860	-	480	677	322	577	41.487	35.818	-5.66903	0.0197217	1.76288	-3.72136	0.682749	1
Solyc01g094315	SL3.0ch01	85717636	85719636	-	477	643	316	558	42.589	36.156	-6.43368	0.00901016	0	-3.91086	1	1
Solyc01g094340	SL3.0ch01	85729056	85731056	+	868	920	691	862	48.546	44.495	-4.05133	0.0363875	-0.161479	4.55011	0.721883	1
Solyc01g094390	SL3.0ch01	85772067	85774067	+	1058	224	822	280	82.527	74.592	-7.93565	1.66644e-05	0	-3.91086	1	1
Solyc01g094485	SL3.0ch01	85821829	85823829	+	122	261	39	336	31.854	10.4	-21.4538	4.85565e-12	0.74454	2.69475	0.0889273	1
Solyc01g094590	SL3.0ch01	85900396	85902396	-	22	38	1	50	36.667	1.961	-34.7059	1.58454e-05	-0.252207	2.16228	0.554678	1
Solyc01g094620	SL3.0ch01	85927592	85929592	-	1747	494	1501	557	77.956	72.935	-5.02138	0.000556828	0.181434	5.07732	0.536792	1
Solyc01g094660	SL3.0ch01	85976649	85978649	+	685	804	573	853	46.004	40.182	-5.8217	0.00464218	0.0890939	5.12756	0.746588	1
Solyc01g094770	SL3.0ch01	86062475	86064475	-	677	296	586	483	69.579	54.818	-14.761	1.13586e-10	0.0423585	6.32609	0.874873	1
Solyc01g094800	SL3.0ch01	86080929	86082929	+	705	517	639	584	57.692	52.249	-5.44374	0.0160046	1.14925	4.74969	0.0498441	1
Solyc01g094880	SL3.0ch01	86149182	86151182	+	1389	323	1351	485	81.133	73.584	-7.5493	7.7925e-07	-0.18387	5.64474	0.529046	1
Solyc01g094940	SL3.0ch01	86216130	86218130	+	1019	603	911	682	62.824	57.188	-5.63598	0.00345667	0.596539	4.92307	0.0529802	1
Solyc01g094970	SL3.0ch01	86243013	86245013	-	670	438	528	515	60.469	50.623	-9.84611	2.87969e-05	-1.91762	-3.55374	1	1
Solyc01g095000	SL3.0ch01	86251821	86253821	-	91	248	29	178	26.844	14.01	-12.834	0.00140608	-0.470712	3.95619	0.28205	1
Solyc01g095020	SL3.0ch01	86257474	86259474	+	1668	672	1268	656	71.282	65.904	-5.37769	0.000654563	0.144557	6.03682	0.629125	1
Solyc01g095070	SL3.0ch01	86309280	86311280	+	1704	635	1530	704	72.852	68.487	-4.36463	0.0036957	-0.206832	6.04997	0.506104	1
Solyc01g095080	SL3.0ch01	86331529	86333529	-	975	358	779	392	73.143	66.524	-6.61895	0.00116227	3.93952	8.53518	4.85826e-06	0.00163934
Solyc01g095100	SL3.0ch01	86372133	86374133	+	351	301	345	401	53.834	46.247	-7.58771	0.0122017	-0.185131	2.98969	0.818965	1
Solyc01g095130	SL3.0ch01	86394658	86396658	-	1217	958	913	865	55.954	51.35	-4.60419	0.00947972	0.0449422	1.06931	0.949754	1
Solyc01g095180	SL3.0ch01	86412836	86414836	+	1330	423	1252	566	75.87	68.867	-7.00305	1.75115e-05	0.728627	0.810704	0.334403	1
Solyc01g095260	SL3.0ch01	86463633	86465633	+	40	21	6	15	65.574	28.571	-37.0023	0.0110983	0	-3.91086	1	1
Solyc01g095310	SL3.0ch01	86499966	86501966	+	344	108	219	164	76.106	57.18	-18.926	6.78809e-08	2.05768	-2.0303	0.106918	1
Solyc01g095305	SL3.0ch01	86501727	86503727	+	152	433	105	481	25.983	17.918	-8.06482	0.00271727	0.499413	5.13401	0.621838	1
Solyc01g095320	SL3.0ch01	86502562	86504562	+	152	478	107	548	24.127	16.336	-7.79111	0.00165486	0.263733	10.921	0.734104	1
Solyc01g095350	SL3.0ch01	86510074	86512074	-	610	304	527	378	66.74	58.232	-8.50756	0.000711149	1.09999	-2.96546	0.628437	1
Solyc01g095360	SL3.0ch01	86509905	86511905	+	610	316	527	419	65.875	55.708	-10.1665	3.81174e-05	-0.8859	-0.444271	0.367225	1
Solyc01g095380	SL3.0ch01	86529643	86531643	-	1425	124	1159	136	91.995	89.498	-2.49677	0.0398636	0	-3.72533	1	1
Solyc01g095390	SL3.0ch01	86534967	86536967	+	958	350	838	433	73.242	65.932	-7.30925	0.000245824	0.262148	3.85648	0.505231	1
Solyc01g095400	SL3.0ch01	86543354	86545354	+	27	321	4	290	7.759	1.361	-6.39808	0.000513649	0.0558337	6.08729	0.830718	1
Solyc01g095410	SL3.0ch01	86547715	86549715	+	49	169	19	154	22.477	10.983	-11.4944	0.00766799	0.166185	7.16462	0.614578	1
Solyc01g095450	SL3.0ch01	86567190	86569190	-	1400	238	1165	286	85.47	80.289	-5.18063	0.000564225	-1.17795	-0.661615	0.158681	1
Solyc01g095460	SL3.0ch01	86575827	86577827	+	1912	1348	1556	1260	58.65	55.256	-3.39462	0.0173085	-0.270759	6.0623	0.597429	1
Solyc01g095490	SL3.0ch01	86605517	86607517	+	1319	430	1012	445	75.415	69.458	-5.95673	0.000679384	0.227658	5.4237	0.431339	1
Solyc01g095510	SL3.0ch01	86624425	86626425	+	1487	665	1298	750	69.099	63.379	-5.71961	0.000366897	-0.144305	3.95126	0.78347	1
Solyc01g095570	SL3.0ch01	86656019	86658019	-	468	720	294	679	39.394	30.216	-9.17811	4.91184e-05	0	-3.91086	1	1
Solyc01g095580	SL3.0ch01	86666328	86668328	+	1154	540	767	544	68.123	58.505	-9.61783	5.46386e-07	-0.0623911	6.68358	0.838338	1
Solyc01g095600	SL3.0ch01	86687845	86689845	+	52	194	19	172	21.138	9.948	-11.1906	0.00458404	0.242157	1.77063	0.681619	1
Solyc01g095610	SL3.0ch01	86694292	86696292	+	1047	767	823	736	57.718	52.79	-4.9275	0.0104466	-0.0312501	2.76586	0.964653	1
Solyc01g095690	SL3.0ch01	86752465	86754465	+	257	193	157	238	57.111	39.747	-17.3643	3.39811e-06	-1.30756	1.43785	0.126618	1
Solyc01g095695	SL3.0ch01	86759454	86761454	-	24	105	1	34	18.605	2.857	-15.7475	0.0336261	0	-3.91086	1	1
Solyc01g095740	SL3.0ch01	86828846	86830846	-	544	111	430	122	83.053	77.899	-5.15488	0.0478491	0.115501	4.20192	0.791418	1
Solyc01g095745	SL3.0ch01	86828846	86830846	-	544	111	430	122	83.053	77.899	-5.15488	0.0478491	0	-3.91086	1	1
Solyc01g095930	SL3.0ch01	86940743	86942743	+	105	390	77	467	21.212	14.154	-7.05771	0.00803085	-0.440399	5.62942	0.311138	1
Solyc01g096015	SL3.0ch01	86981462	86983462	+	20	0	63	17	100	78.75	-21.25	0.0372653	0	-3.91086	1	1
Solyc01g096050	SL3.0ch01	87019753	87021753	-	428	594	301	611	41.879	33.004	-8.87428	0.0002749	0.113408	6.60155	0.722775	1
Solyc01g096080	SL3.0ch01	87064713	87066713	+	659	369	456	534	64.105	46.061	-18.0445	1.09805e-14	0.413404	3.51179	0.352264	1
Solyc01g096130	SL3.0ch01	87119354	87121354	-	324	690	238	728	31.953	24.638	-7.31498	0.00114248	0.148518	5.41583	0.616493	1
Solyc01g096140	SL3.0ch01	87126002	87128002	+	860	767	521	773	52.858	40.263	-12.5953	2.11685e-10	-0.588684	-0.839954	0.48805	1
Solyc01g096175	SL3.0ch01	87145560	87147560	+	48	112	0	85	30	0	-30	1.24581e-09	0	-3.72885	1	1
Solyc01g096250	SL3.0ch01	87208405	87210405	+	29	0	12	30	100	28.571	-71.4286	1.63889e-09	-1.07571	1.79952	0.141703	1
Solyc01g096320	SL3.0ch01	87266918	87268918	-	349	1162	158	889	23.097	15.091	-8.00655	3.90285e-06	0.218236	4.98376	0.641615	1
Solyc01g096400	SL3.0ch01	87374121	87376121	+	3236	404	3395	500	88.901	87.163	-1.73807	0.038144	-1.08813	1.68322	0.0408143	0.928674
Solyc01g096410	SL3.0ch01	87389018	87391018	-	313	765	196	779	29.035	20.103	-8.93269	1.84372e-05	-1.10791	-1.20331	0.285867	1
Solyc01g096450	SL3.0ch01	87417110	87419110	+	1197	212	1172	262	84.954	81.729	-3.22444	0.0416171	-0.645869	2.41126	0.206797	1
Solyc01g096470	SL3.0ch01	87430419	87432419	+	1819	244	1543	275	88.173	84.873	-3.29908	0.00733181	0.366303	4.0088	0.328114	1
Solyc01g096490	SL3.0ch01	87455537	87457537	-	251	552	240	701	31.258	25.505	-5.753	0.0187436	0.223219	5.91128	0.529093	1
Solyc01g096500	SL3.0ch01	87467587	87469587	-	1767	556	1485	666	76.065	69.038	-7.02778	1.2459e-06	0.0551401	5.78069	0.852649	1
Solyc01g096570	SL3.0ch01	87517271	87519271	+	591	532	484	567	52.627	46.051	-6.57551	0.00608078	0.469907	4.75202	0.257484	1
Solyc01g096690	SL3.0ch01	87593075	87595075	-	377	365	295	377	50.809	43.899	-6.90982	0.0216046	1.78455	-3.73058	1	1
Solyc01g096810	SL3.0ch01	87680703	87682703	-	478	823	322	910	36.741	26.136	-10.6046	9.54126e-08	0.0558834	7.23539	0.848754	1
Solyc01g096865	SL3.0ch01	87732797	87734797	-	629	443	600	516	58.675	53.763	-4.91193	0.0399578	0.766766	-3.62791	0.872638	1
Solyc01g096880	SL3.0ch01	87752415	87754415	-	16	14	13	36	53.333	26.531	-26.8027	0.049842	-1.54096	0.867419	0.134489	1
Solyc01g096890	SL3.0ch01	87761215	87763215	-	1615	569	1343	598	73.947	69.191	-4.75575	0.00240169	0.17203	3.06104	0.643549	1
Solyc01g096930	SL3.0ch01	87805413	87807413	+	978	637	721	606	60.557	54.333	-6.22419	0.00228405	0.665995	3.73179	0.138131	1
Solyc01g096940	SL3.0ch01	87819539	87821539	-	593	932	467	949	38.885	32.98	-5.90502	0.00283675	-0.802873	1.61755	0.317312	1
Solyc01g096960	SL3.0ch01	87838876	87840876	-	1468	255	1298	323	85.2	80.074	-5.1262	0.000401833	-0.0801189	2.42714	0.84784	1
Solyc01g096970	SL3.0ch01	87838205	87840205	+	1468	265	1298	347	84.709	78.906	-5.80282	7.24378e-05	0.179963	1.84255	0.744344	1
Solyc01g096980	SL3.0ch01	87846986	87848986	-	353	239	261	413	59.628	38.724	-20.9043	2.50461e-12	-0.796939	-3.1045	0.847013	1
Solyc01g097030	SL3.0ch01	87883983	87885983	-	2273	276	1517	257	89.172	85.513	-3.65926	0.00120297	0.201773	4.46501	0.478451	1
Solyc01g097040	SL3.0ch01	87887591	87889591	+	894	887	700	856	50.197	44.987	-5.20937	0.00717545	0.523381	3.94158	0.179155	1
Solyc01g097260	SL3.0ch01	88053216	88055216	-	1512	539	1224	610	73.72	66.739	-6.98077	1.23948e-05	0.642193	-1.25918	0.39584	1
Solyc01g097320	SL3.0ch01	88098304	88100304	-	1896	213	1330	569	89.9	70.037	-19.8636	2.1097e-55	0.257433	4.59887	0.420414	1
Solyc01g097340	SL3.0ch01	88111762	88113762	+	2017	669	1888	746	75.093	71.678	-3.41502	0.0120672	-1.09504	5.23972	0.00343468	0.248532
Solyc01g097350	SL3.0ch01	88123487	88125487	-	2707	356	2185	383	88.377	85.086	-3.29174	0.00107886	0.146902	6.56507	0.689822	1
Solyc01g097380	SL3.0ch01	88135811	88137811	+	113	283	61	229	28.535	21.034	-7.50087	0.0460625	0.46995	-1.49803	0.627086	1
Solyc01g097420	SL3.0ch01	88154645	88156645	-	830	537	546	699	60.717	43.855	-16.8615	2.12199e-16	3.9169	-2.98475	0.256732	1
Solyc01g097450	SL3.0ch01	88178738	88180738	+	146	13	144	69	91.824	67.606	-24.2183	1.25423e-07	0.0467129	7.07468	0.869168	1
Solyc01g097570	SL3.0ch01	88238636	88240636	+	1659	468	1426	478	77.997	74.895	-3.10222	0.0380164	1.43276	-0.937265	0.352741	1
Solyc01g097620	SL3.0ch01	88271940	88273940	+	97	286	39	340	25.326	10.29	-15.0361	4.39843e-07	1.80839	-2.98189	1	1
Solyc01g097700	SL3.0ch01	88315518	88317518	+	829	278	618	288	74.887	68.212	-6.67516	0.00298141	-1.94065	-3.72817	1	1
Solyc01g097740	SL3.0ch01	88331631	88333631	+	90	32	52	46	73.77	53.061	-20.7093	0.00488679	0.0757248	5.62152	0.77007	1
Solyc01g097850	SL3.0ch01	88427817	88429817	+	335	145	390	225	69.792	63.415	-6.37703	0.0487789	0	-3.71273	1	1
Solyc01g097930	SL3.0ch01	88479333	88481333	+	680	479	608	584	58.671	51.007	-7.66456	0.000715111	-3.46634	-3.41812	0.317875	1
Solyc01g098060	SL3.0ch01	88534284	88536284	-	186	245	138	290	43.155	32.243	-10.9125	0.00344926	1.00096	-0.734134	0.657216	1
Solyc01g098110	SL3.0ch01	88577599	88579599	+	197	492	133	442	28.592	23.13	-5.46173	0.0490853	-0.663614	6.11889	0.107199	1
Solyc01g098130	SL3.0ch01	88597953	88599953	-	431	414	302	438	51.006	40.811	-10.1951	0.000233483	0	-3.91086	1	1
Solyc01g098140	SL3.0ch01	88597036	88599036	+	311	282	265	408	52.445	39.376	-13.0693	2.05267e-05	2.50072	0.00626859	0.123818	1
Solyc01g098160	SL3.0ch01	88616034	88618034	-	1443	304	1200	402	82.599	74.906	-7.69237	4.64872e-07	0.220033	5.65428	0.442417	1
Solyc01g098170	SL3.0ch01	88617825	88619825	+	706	206	562	290	77.412	65.962	-11.4498	8.8436e-07	0.0804808	5.41241	0.782951	1
Solyc01g098210	SL3.0ch01	88677949	88679949	-	1537	790	1312	775	66.051	62.865	-3.18535	0.0471584	0.183919	4.79678	0.55471	1
Solyc01g098240	SL3.0ch01	88693392	88695392	+	1030	373	883	435	73.414	66.995	-6.41866	0.000929962	-0.210668	-1.73344	0.897954	1
Solyc01g098420	SL3.0ch01	88812267	88814267	+	101	19	1	49	84.167	2	-82.1667	5.46624e-24	0	-3.91086	1	1
Solyc01g098430	SL3.0ch01	88825757	88827757	-	993	465	779	499	68.107	60.955	-7.15238	0.000405104	0.168719	6.01726	0.576784	1
Solyc01g098555	SL3.0ch01	88925555	88927555	-	129	22	84	41	85.43	67.2	-18.2305	0.00159891	0	-3.91086	1	1
Solyc01g098560	SL3.0ch01	88922659	88924659	+	415	559	203	684	42.608	22.886	-19.7217	4.35011e-18	-0.271186	4.25184	0.494377	1
Solyc01g098580	SL3.0ch01	88939777	88941777	+	1975	700	1676	708	73.832	70.302	-3.52976	0.0129679	-0.121554	3.3464	0.762351	1
Solyc01g098640	SL3.0ch01	88968273	88970273	+	163	430	114	418	27.487	21.429	-6.05878	0.0345911	-0.946704	4.25203	0.0304714	0.813966
Solyc01g098645	SL3.0ch01	88975814	88977814	-	109	184	98	249	37.201	28.242	-8.95929	0.0330187	0.202869	3.66424	0.684597	1
Solyc01g098660	SL3.0ch01	88975013	88977013	+	134	231	130	312	36.712	29.412	-7.30056	0.0492892	0	-3.91086	1	1
Solyc01g098890	SL3.0ch01	89143367	89145367	-	134	282	101	402	32.212	20.08	-12.132	0.000137231	1.1066	-0.43884	0.354382	1
Solyc01g098980	SL3.0ch01	89213435	89215435	-	31	110	0	83	21.986	0	-21.9858	1.98975e-06	0.476983	-0.605461	0.63389	1
Solyc01g099000	SL3.0ch01	89229753	89231753	-	33	316	17	331	9.456	4.885	-4.57053	0.0463313	0	-3.91086	1	1
Solyc01g099030	SL3.0ch01	89278818	89280818	-	102	24	20	54	80.952	27.027	-53.9254	1.33462e-12	-0.358506	-1.47297	0.782126	1
Solyc01g099070	SL3.0ch01	89278603	89280603	-	102	24	20	54	80.952	27.027	-53.9254	1.33462e-12	0	-3.91086	1	1
Solyc01g099090	SL3.0ch01	89288229	89290229	-	1027	1043	635	987	49.614	39.149	-10.4643	3.02756e-09	-0.304621	6.92324	0.30656	1
Solyc01g099180	SL3.0ch01	89362504	89364504	+	517	137	383	169	79.052	69.384	-9.66793	0.000576025	1.39019	4.24504	0.111954	1
Solyc01g099240	SL3.0ch01	89411870	89413870	+	76	67	83	183	53.147	31.203	-21.9438	9.52531e-05	-0.0636866	3.96156	0.86586	1
Solyc01g099250	SL3.0ch01	89418286	89420286	-	49	25	38	43	66.216	46.914	-19.3026	0.0409137	-2.59823	-2.09137	0.0388194	0.912991
Solyc01g099350	SL3.0ch01	89504517	89506517	+	1171	506	1064	649	69.827	62.113	-7.71382	1.48388e-05	0.0448612	5.84343	0.873146	1
Solyc01g099360	SL3.0ch01	89520023	89522023	+	1765	590	1622	649	74.947	71.422	-3.52464	0.0157244	0.467668	4.81001	0.124809	1
Solyc01g099460	SL3.0ch01	89576637	89578637	+	1196	391	970	467	75.362	67.502	-7.86058	1.15909e-05	-0.376886	1.59352	0.467657	1
Solyc01g099480	SL3.0ch01	89598073	89600073	+	1477	1054	1286	1043	58.356	55.217	-3.13955	0.0473712	1.06299	0.392199	0.0862697	1
Solyc01g099487	SL3.0ch01	89606855	89608855	+	405	6	389	17	98.54	95.813	-2.72734	0.0368314	-1.2563	-0.923353	0.267193	1
Solyc01g099540	SL3.0ch01	89630484	89632484	+	350	104	391	205	77.093	65.604	-11.4885	0.000235201	0	-3.86778	1	1
Solyc01g099560	SL3.0ch01	89642708	89644708	-	847	438	637	523	65.914	54.914	-11.0006	2.47526e-07	-1.3401	-2.16037	0.265689	1
Solyc01g099660	SL3.0ch01	89712792	89714792	+	463	261	401	310	63.95	56.399	-7.55084	0.00882919	-0.0959265	3.2343	0.95912	1
Solyc01g099715	SL3.0ch01	89752168	89754168	+	279	226	135	194	55.248	41.033	-14.2141	0.000299769	-0.407989	5.72498	0.117798	1
Solyc01g099740	SL3.0ch01	89771148	89773148	+	1823	461	1648	503	79.816	76.616	-3.20058	0.0220961	0.110618	6.04008	0.670687	1
Solyc01g099790	SL3.0ch01	89809377	89811377	+	519	798	257	855	39.408	23.112	-16.2962	1.75809e-16	0.0338565	6.92068	0.894321	1
Solyc01g099840	SL3.0ch01	89860093	89862093	+	819	868	555	706	48.548	44.013	-4.53503	0.0294029	-0.223222	8.30811	0.572659	1
Solyc01g099850	SL3.0ch01	89863994	89865994	+	217	878	113	613	19.817	15.565	-4.25261	0.0388454	3.74393	-1.49145	0.000217746	0.0345051
Solyc01g099865	SL3.0ch01	89879837	89881837	-	915	666	856	762	57.875	52.905	-4.96994	0.0115572	0	-3.91086	1	1
Solyc01g099925	SL3.0ch01	89920626	89922626	+	241	401	162	474	37.539	25.472	-12.0672	2.0664e-05	-0.207296	0.434476	0.773453	1
Solyc01g100060	SL3.0ch01	90036337	90038337	+	165	253	82	243	39.474	25.231	-14.2429	0.000196582	0.114961	5.2648	0.711938	1
Solyc01g100070	SL3.0ch01	90043529	90045529	-	74	83	1	108	47.134	0.917	-46.2163	1.64041e-18	-1.72116	-1.24784	0.39469	1
Solyc01g100080	SL3.0ch01	90042186	90044186	+	72	168	14	135	30	9.396	-20.604	8.04318e-06	0.0963496	3.91589	0.792635	1
Solyc01g100200	SL3.0ch01	90139052	90141052	-	685	716	443	570	48.894	43.731	-5.16216	0.0259081	0	-3.91086	1	1
Solyc01g100330	SL3.0ch01	90270215	90272215	+	1441	852	1323	947	62.843	58.282	-4.5615	0.00454261	0.0951379	4.75314	0.721499	1
Solyc01g100340	SL3.0ch01	90285171	90287171	+	520	819	403	765	38.835	34.503	-4.33153	0.0438642	-0.00140731	1.09049	1	1
Solyc01g100380	SL3.0ch01	90308815	90310815	-	1036	990	897	1100	51.135	44.917	-6.21787	0.00033376	0	-3.91086	1	1
Solyc01g100460	SL3.0ch01	90358888	90360888	+	660	888	522	893	42.636	36.89	-5.7452	0.00446819	0.229152	3.53929	0.697433	1
Solyc01g100490	SL3.0ch01	90376789	90378789	+	479	444	381	459	51.896	45.357	-6.53885	0.0146256	2.01157	-0.306839	0.0202518	0.674456
Solyc01g100500	SL3.0ch01	90386495	90388495	-	433	711	379	761	37.85	33.246	-4.60404	0.0409504	0.307292	6.32577	0.258642	1
Solyc01g100540	SL3.0ch01	90429786	90431786	-	2199	233	1981	267	90.419	88.123	-2.29663	0.0241672	-0.021	3.29588	0.962119	1
Solyc01g100580	SL3.0ch01	90441494	90443494	+	763	464	673	502	62.184	57.277	-4.90759	0.0301391	0.255272	4.29548	0.464077	1
Solyc01g100650	SL3.0ch01	90493588	90495588	+	232	576	82	522	28.713	13.576	-15.1367	1.21754e-10	-0.387626	5.99085	0.179072	1
Solyc01g100780	SL3.0ch01	90603291	90605291	-	1482	195	1246	220	88.372	84.993	-3.37891	0.013561	-0.201439	3.11666	0.607503	1
Solyc01g100810	SL3.0ch01	90620881	90622881	-	241	872	137	749	21.653	15.463	-6.19044	0.00149138	-0.848719	4.76816	0.0123749	0.537166
Solyc01g100910	SL3.0ch01	90682935	90684935	+	883	305	728	332	74.327	68.679	-5.64735	0.00788553	-0.260765	-2.09732	0.865267	1
Solyc01g100990	SL3.0ch01	90739000	90741000	-	115	23	72	48	83.333	60	-23.3333	0.000190871	0.408593	4.01506	0.221271	1
Solyc01g101035	SL3.0ch01	90775837	90777837	-	1036	674	870	695	60.585	55.591	-4.99374	0.00979966	1.42205	-3.41566	0.58123	1
Solyc01g101090	SL3.0ch01	90814728	90816728	+	2406	107	2254	137	95.742	94.27	-1.47196	0.0337919	0.0167693	5.58334	0.966121	1
Solyc01g101170	SL3.0ch01	90887986	90889986	-	761	366	617	365	67.524	62.831	-4.69344	0.0433102	5.17233	2.29738	0.0478246	0.994919
Solyc01g102300	SL3.0ch01	90997673	90999673	+	559	1146	488	1181	32.786	29.239	-3.54686	0.0480187	0.450071	6.05171	0.241196	1
Solyc01g102360	SL3.0ch01	91073903	91075903	-	595	639	357	605	48.217	37.11	-11.107	1.47242e-06	-4.43229	-3.65227	0.269633	1
Solyc01g102420	SL3.0ch01	91117196	91119196	+	532	573	411	578	48.145	41.557	-6.58767	0.00709011	-4.2184	-3.42927	0.281968	1
Solyc01g102450	SL3.0ch01	91135871	91137871	-	135	44	4	6	75.419	40	-35.419	0.0405197	-2.99636	-2.26531	0.0463768	0.978964
Solyc01g102550	SL3.0ch01	91220219	91222219	-	1848	425	1620	514	81.302	75.914	-5.38847	7.10331e-05	0.54709	2.04806	0.405242	1
Solyc01g102650	SL3.0ch01	91276249	91278249	+	150	10	75	15	93.75	83.333	-10.4167	0.0275772	0.548077	-0.733586	0.577691	1
Solyc01g102685	SL3.0ch01	91297665	91299665	+	275	35	121	37	88.71	76.582	-12.1274	0.00304525	2.55294	-2.77168	0.611666	1
Solyc01g102700	SL3.0ch01	91307947	91309947	+	1724	574	1652	671	75.022	71.115	-3.90682	0.00723838	-0.015595	2.53962	0.982514	1
Solyc01g102705	SL3.0ch01	91316650	91318650	+	356	99	71	199	78.242	26.296	-51.9455	1.04467e-41	-2.67533	-3.48477	0.300421	1
Solyc02g024065	SL3.0ch01	91323590	91325590	+	68	1	80	11	98.551	87.912	-10.6386	0.0262731	0	-3.91086	1	1
Solyc01g102730	SL3.0ch01	91339245	91341245	-	663	312	645	385	68	62.621	-5.37864	0.0255203	0.127532	2.83884	0.755841	1
Solyc01g102820	SL3.0ch01	91400752	91402752	-	1316	281	1222	333	82.405	78.585	-3.8193	0.0154007	-0.590039	4.30232	0.0830565	1
Solyc01g102880	SL3.0ch01	91441495	91443495	-	620	831	432	751	42.729	36.517	-6.21182	0.00348884	0.0599053	2.77122	0.887066	1
Solyc01g102890	SL3.0ch01	91444225	91446225	-	446	818	278	688	35.285	28.778	-6.50634	0.00346138	0	-3.91086	1	1
Solyc01g102970	SL3.0ch01	91487448	91489448	+	28	742	5	601	3.636	0.825	-2.81128	0.00181655	0.506609	5.18274	0.0615838	1
Solyc01g103010	SL3.0ch01	91545512	91547512	+	1507	524	1384	568	74.2	70.902	-3.29826	0.0378671	-0.00636092	6.92749	0.982542	1
Solyc01g103040	SL3.0ch01	91601297	91603297	-	1214	398	818	332	75.31	71.13	-4.17974	0.0277644	0.0766391	4.30735	0.804284	1
Solyc01g103260	SL3.0ch01	91785078	91787078	-	1580	1104	1292	1031	58.867	55.618	-3.24963	0.0393163	0	-3.91086	1	1
Solyc01g103370	SL3.0ch01	91866909	91868909	+	862	855	581	794	50.204	42.255	-7.9493	5.96859e-05	0.0623945	6.32545	0.830203	1
Solyc01g103420	SL3.0ch01	91902558	91904558	+	692	538	500	545	56.26	47.847	-8.41327	0.000271859	0.13862	6.38133	0.621997	1
Solyc01g103430	SL3.0ch01	91920386	91922386	+	1117	564	862	576	66.449	59.944	-6.50418	0.000710387	-0.0249483	7.35524	0.930774	1
Solyc01g103450	SL3.0ch01	91937779	91939779	+	13	80	1	77	13.978	1.282	-12.6964	0.0086226	-0.153615	8.99957	0.627125	1
Solyc01g103480	SL3.0ch01	91959744	91961744	-	836	353	715	395	70.311	64.414	-5.89677	0.00721623	-0.0513216	7.64424	0.846172	1
Solyc01g103500	SL3.0ch01	91973854	91975854	-	425	347	328	396	55.052	45.304	-9.74795	0.000718103	0.373609	1.04185	0.712806	1
Solyc01g103610	SL3.0ch01	92060974	92062974	-	347	15	301	43	95.856	87.5	-8.35635	0.000235543	0.60121	0.821148	0.385281	1
Solyc01g103720	SL3.0ch01	92156303	92158303	-	109	208	8	191	34.385	4.02	-30.3648	1.45614e-16	0.205185	7.02856	0.454581	1
Solyc01g103862	SL3.0ch01	92266198	92268198	-	107	193	16	144	35.667	10	-25.6667	7.79162e-09	1.10345	2.69351	0.0265005	0.771253
Solyc01g103920	SL3.0ch01	92301352	92303352	-	96	2	20	14	97.959	58.824	-39.1357	3.78085e-07	0.0344926	4.88941	0.945451	1
Solyc01g103930	SL3.0ch01	92308665	92310665	-	1139	720	964	785	61.269	55.117	-6.15229	0.000745318	-0.0159416	5.86691	0.956575	1
Solyc01g103940	SL3.0ch01	92309553	92311553	+	1370	845	1186	912	61.851	56.53	-5.32099	0.00137395	-0.189716	7.29694	0.491391	1
Solyc01g103950	SL3.0ch01	92326721	92328721	-	759	1627	449	1495	31.811	23.097	-8.71385	2.37566e-09	0.0556042	4.59632	0.854378	1
Solyc01g104230	SL3.0ch01	92572917	92574917	-	1083	404	1038	473	72.831	68.696	-4.13498	0.0277644	-1.13887	-0.936843	0.309977	1
Solyc01g104280	SL3.0ch01	92597859	92599859	+	111	37	105	63	75	62.5	-12.5	0.0382008	-0.350249	2.92214	0.397931	1
Solyc01g104300	SL3.0ch01	92617471	92619471	-	1731	342	1334	397	83.502	77.065	-6.43689	4.34237e-06	0.318328	4.47254	0.378841	1
Solyc01g104345	SL3.0ch01	92630395	92632395	+	1448	351	1327	389	80.489	77.331	-3.15816	0.0406753	0	-3.82941	1	1
Solyc01g104350	SL3.0ch01	92642122	92644122	+	525	395	398	574	57.065	40.947	-16.1187	4.12911e-11	0.160841	4.45996	0.602129	1
Solyc01g104360	SL3.0ch01	92651884	92653884	-	1184	658	1039	680	64.278	60.442	-3.83584	0.0345292	0	-3.91086	1	1
Solyc01g104400	SL3.0ch01	92671766	92673766	-	514	572	457	682	47.33	40.123	-7.20674	0.00199646	-5.07862	0.480823	0.000141713	0.0241371
Solyc01g104430	SL3.0ch01	92701910	92703910	-	932	892	763	882	51.096	46.383	-4.71351	0.0133331	0.420217	1.65168	0.489435	1
Solyc01g104434	SL3.0ch01	92746083	92748083	-	1075	500	906	643	68.254	58.489	-9.76462	1.51206e-07	0.0138261	3.60407	0.982219	1
Solyc01g104436	SL3.0ch01	92772395	92774395	-	876	30	695	43	96.689	94.173	-2.5153	0.0302645	-0.0281567	-0.755235	1	1
Solyc01g104446	SL3.0ch01	92792461	92794461	+	544	21	580	66	96.283	89.783	-6.4999	5.45308e-05	0	-3.87342	1	1
Solyc01g104490	SL3.0ch01	92837969	92839969	+	510	666	421	726	43.367	36.704	-6.6629	0.00326291	-0.110632	1.32965	0.883765	1
Solyc01g104500	SL3.0ch01	92861871	92863871	-	17	201	0	138	7.798	0	-7.79817	0.000772419	0.0943467	6.60425	0.757195	1
Solyc01g104530	SL3.0ch01	92884980	92886980	-	1109	96	956	167	92.033	85.129	-6.90408	1.11034e-06	0.382862	5.98219	0.183829	1
Solyc01g104540	SL3.0ch01	92891584	92893584	+	610	1381	382	1240	30.638	23.551	-7.0867	1.40848e-05	0.284325	5.52726	0.315297	1
Solyc01g104570	SL3.0ch01	92929287	92931287	-	1385	933	997	863	59.75	53.602	-6.14763	0.000311522	0.236255	2.29179	0.642906	1
Solyc01g104580	SL3.0ch01	92929637	92931637	+	1061	757	787	710	58.361	52.572	-5.78903	0.00257948	-0.147151	3.72325	0.682891	1
Solyc01g104610	SL3.0ch01	92950574	92952574	-	178	375	140	558	32.188	20.057	-12.1308	8.0003e-06	1.94273	-3.69262	1	1
Solyc01g104620	SL3.0ch01	92950456	92952456	+	214	630	160	697	25.355	18.67	-6.68567	0.00304525	1.02496	3.51226	0.066019	1
Solyc01g104650	SL3.0ch01	92972817	92974817	+	833	418	721	489	66.587	59.587	-6.99995	0.00113684	1.5371	6.31769	0.00559431	0.339148
Solyc01g104680	SL3.0ch01	92993924	92995924	-	73	58	42	80	55.725	34.426	-21.299	0.00293011	-0.129031	5.94142	0.71884	1
Solyc01g104685	SL3.0ch01	93002019	93004019	-	2247	371	2022	482	85.829	80.751	-5.07808	8.18871e-06	0.0748803	8.52004	0.828907	1
Solyc01g104710	SL3.0ch01	93011257	93013257	-	234	1111	137	898	17.398	13.237	-4.16105	0.0139102	-0.168893	4.72936	0.728724	1
Solyc01g104720	SL3.0ch01	93013363	93015363	-	871	531	606	503	62.126	54.644	-7.48171	0.000650845	0.878399	9.88149	0.0112135	0.504508
Solyc01g104775	SL3.0ch01	93034082	93036082	-	395	1130	294	1160	25.902	20.22	-5.68156	0.000926099	0.151018	7.91048	0.563203	1
Solyc01g104800	SL3.0ch01	93052896	93054896	+	101	162	43	170	38.403	20.188	-18.2152	7.8614e-05	0	-3.91086	1	1
Solyc01g104820	SL3.0ch01	93053011	93055011	+	67	162	43	170	29.258	20.188	-9.06985	0.0483337	0	-3.87249	1	1
Solyc01g104910	SL3.0ch01	93123953	93125953	-	1004	815	925	980	55.195	48.556	-6.63873	0.000238137	0.107325	7.81194	0.76851	1
Solyc01g104915	SL3.0ch01	93123865	93125865	-	1006	861	925	1001	53.883	48.027	-5.85624	0.00109399	-0.751506	-1.7432	0.607892	1
Solyc01g104940	SL3.0ch01	93154592	93156592	+	39	413	8	273	8.628	2.847	-5.78134	0.00467581	1.78817	-3.87428	1	1
Solyc01g104950	SL3.0ch01	93168894	93170894	-	683	822	524	769	45.382	40.526	-4.85615	0.0213478	-1.68937	6.08466	6.45418e-07	0.000299809
Solyc01g105000	SL3.0ch01	93200941	93202941	+	123	37	51	31	76.875	62.195	-14.6799	0.0409033	3.59757	-3.45197	0.467673	1
Solyc01g105030	SL3.0ch01	93219205	93221205	+	85	30	65	75	73.913	46.429	-27.4845	6.30187e-05	0	-3.91086	1	1
Solyc01g105080	SL3.0ch01	93250108	93252108	+	301	370	221	354	44.858	38.435	-6.42364	0.0433102	-3.08414	-3.36206	0.266316	1
Solyc01g105150	SL3.0ch01	93314321	93316321	+	1063	199	870	247	84.231	77.887	-6.34418	0.000327999	-0.218366	4.68631	0.445195	1
Solyc01g105160	SL3.0ch01	93339116	93341116	-	61	5	0	10	92.424	0	-92.4242	3.38806e-08	0.11543	4.3078	0.693013	1
Solyc01g105190	SL3.0ch01	93348913	93350913	+	297	360	220	394	45.205	35.831	-9.37486	0.00231291	1.11355	-2.12192	0.671423	1
Solyc01g105220	SL3.0ch01	93358156	93360156	-	575	413	453	414	58.198	52.249	-5.94925	0.0232255	0.253853	0.11726	0.768223	1
Solyc01g105230	SL3.0ch01	93357100	93359100	+	500	598	363	615	45.537	37.117	-8.42078	0.00042169	-0.0220551	6.03438	0.94394	1
Solyc01g105270	SL3.0ch01	93396258	93398258	-	1911	195	1581	212	90.741	88.176	-2.5645	0.0207585	-0.000501242	4.24301	1	1
Solyc01g105290	SL3.0ch01	93405976	93407976	+	49	337	25	305	12.694	7.576	-5.11854	0.0462412	0.182558	5.78247	0.643639	1
Solyc01g105300	SL3.0ch01	93412388	93414388	-	622	597	581	697	51.025	45.462	-5.56377	0.0130144	-1.42775	0.638133	0.0926252	1
Solyc01g105320	SL3.0ch01	93423185	93425185	-	15	17	0	10	46.875	0	-46.875	0.0161224	0.201702	1.40556	0.765562	1
Solyc01g105330	SL3.0ch01	93429947	93431947	-	1030	700	816	670	59.538	54.913	-4.62506	0.0190925	-0.0631084	3.75136	0.872271	1
Solyc01g105340	SL3.0ch01	93432019	93434019	+	879	640	640	554	57.867	53.601	-4.26568	0.0458359	0.15253	9.15673	0.629655	1
Solyc01g105350	SL3.0ch01	93440896	93442896	+	262	679	203	685	27.843	22.86	-4.98236	0.0298884	0.37109	1.42311	0.620158	1
Solyc01g105355	SL3.0ch01	93443479	93445479	+	369	478	226	416	43.566	35.202	-8.36303	0.0032943	0	-3.91086	1	1
Solyc01g105410	SL3.0ch01	93480094	93482094	+	732	510	620	573	58.937	51.97	-6.96737	0.00194917	0.199034	7.95823	0.697923	1
Solyc01g105450	SL3.0ch01	93514791	93516791	-	479	1402	274	1320	25.465	17.189	-8.27572	3.45977e-08	1.85244	-1.94652	0.24469	1
Solyc01g105530	SL3.0ch01	93570670	93572670	+	63	33	46	56	65.625	45.098	-20.527	0.0103209	-0.395519	1.70434	0.51375	1
Solyc01g105540	SL3.0ch01	93577524	93579524	-	405	789	208	630	33.92	24.821	-9.0986	6.33212e-05	-0.362853	4.90396	0.270501	1
Solyc01g105550	SL3.0ch01	93581032	93583032	+	1232	244	1184	323	83.469	78.567	-4.90215	0.00207221	-0.809043	-2.59742	0.729104	1
Solyc01g105580	SL3.0ch01	93608446	93610446	-	530	198	460	223	72.802	67.35	-5.45227	0.0465494	0	-3.91086	1	1
Solyc01g105730	SL3.0ch01	93693078	93695078	-	689	180	540	257	79.287	67.754	-11.5325	8.88005e-07	0	-3.91086	1	1
Solyc01g105850	SL3.0ch01	93770705	93772705	+	1306	411	1060	408	76.063	72.207	-3.85582	0.0283634	0	-3.91086	1	1
Solyc01g105940	SL3.0ch01	93857173	93859173	+	770	208	515	218	78.732	70.259	-8.4729	0.000313967	3.48887	-1.69313	0.041785	0.935274
Solyc01g105950	SL3.0ch01	93858638	93860638	+	820	332	531	295	71.181	64.286	-6.89484	0.00354133	-2.74478	-3.65593	0.61349	1
Solyc01g106055	SL3.0ch01	93929430	93931430	+	1077	421	850	411	71.896	67.407	-4.48904	0.0226164	-0.0178008	3.36491	0.962143	1
Solyc01g106100	SL3.0ch01	93979250	93981250	-	483	554	431	745	46.577	36.65	-9.927	1.46414e-05	0	-3.91086	1	1
Solyc01g106130	SL3.0ch01	93986203	93988203	+	211	195	104	188	51.97	35.616	-16.354	0.000104802	2.62958	-3.7962	0.587688	1
Solyc01g106340	SL3.0ch01	94163153	94165153	+	77	492	32	343	13.533	8.533	-4.99918	0.0391017	-2.5172	-0.623163	0.0275211	0.783115
Solyc01g106375	SL3.0ch01	94196517	94198517	+	42	195	12	198	17.722	5.714	-12.0072	0.000477221	-0.439008	2.28355	0.300389	1
Solyc01g106560	SL3.0ch01	94278266	94280266	+	1360	97	1229	129	93.342	90.501	-2.84175	0.0148845	0.266611	4.00329	0.450041	1
Solyc01g106635	SL3.0ch01	94326948	94328948	-	120	541	89	575	18.154	13.404	-4.7507	0.0356772	0	-3.91086	1	1
Solyc01g106650	SL3.0ch01	94330606	94332606	-	1527	813	1235	763	65.256	61.812	-3.4446	0.0353079	-1.003	-0.424695	0.24673	1
Solyc01g106730	SL3.0ch01	94371397	94373397	-	74	275	38	293	21.203	11.48	-9.72308	0.00201288	1.78817	-3.87428	1	1
Solyc01g106860	SL3.0ch01	94479454	94481454	+	569	48	376	91	92.22	80.514	-11.7065	1.40937e-07	0.577997	-2.87868	0.770937	1
Solyc01g106900	SL3.0ch01	94501200	94503200	+	893	600	674	678	59.812	49.852	-9.96039	8.34353e-07	0.291606	6.22557	0.302969	1
Solyc01g106940	SL3.0ch01	94527408	94529408	+	240	333	127	391	41.885	24.517	-17.3674	1.61788e-08	0.19461	4.57539	0.549044	1
Solyc01g106950	SL3.0ch01	94530828	94532828	+	163	64	96	68	71.806	58.537	-13.2696	0.0151755	1.68411	-2.15337	0.225744	1
Solyc01g106970	SL3.0ch01	94568509	94570509	-	1218	428	1076	514	73.998	67.673	-6.32461	0.000328104	0	-3.91086	1	1
Solyc01g106980	SL3.0ch01	94577515	94579515	-	285	736	174	612	27.914	22.137	-5.77641	0.0124873	-3.92714	-3.66542	0.358036	1
Solyc01g107020	SL3.0ch01	94594283	94596283	+	151	47	115	62	76.263	64.972	-11.2909	0.0323437	0	-3.91086	1	1
Solyc01g107180	SL3.0ch01	94697873	94699873	+	2108	110	1887	137	95.041	93.231	-1.80935	0.0250951	0.152542	3.15559	0.697373	1
Solyc01g107200	SL3.0ch01	94729939	94731939	-	510	45	566	95	91.892	85.628	-6.26406	0.00244968	-0.555424	3.14937	0.259748	1
Solyc01g107210	SL3.0ch01	94744124	94746124	+	887	578	620	551	60.546	52.946	-7.59988	0.00041733	0.453393	3.27425	0.22438	1
Solyc01g107220	SL3.0ch01	94751992	94753992	-	230	5	156	33	97.872	82.54	-15.3327	2.06371e-07	0	-3.91086	1	1
Solyc01g107277	SL3.0ch01	94771890	94773890	-	563	977	475	1052	36.558	31.107	-5.4517	0.0043031	4.82521	-2.10723	0.0025505	0.206863
Solyc01g107350	SL3.0ch01	94812040	94814040	-	261	465	190	509	35.95	27.182	-8.76873	0.00137696	0.209342	3.53244	0.622298	1
Solyc01g107395	SL3.0ch01	94858169	94860169	+	39	221	14	185	15	7.035	-7.96482	0.0173634	1.90134	-3.87171	1	1
Solyc01g107490	SL3.0ch01	94915506	94917506	+	1049	342	563	438	75.413	56.244	-19.1696	4.15116e-21	-1.51983	-2.35108	0.42328	1
Solyc01g107620	SL3.0ch01	95003053	95005053	+	682	647	443	837	51.317	34.609	-16.7074	2.29072e-16	0.349305	3.48903	0.320395	1
Solyc01g107660	SL3.0ch01	95028498	95030498	-	916	262	725	264	77.759	73.306	-4.45254	0.0337035	-0.357382	5.36026	0.325467	1
Solyc01g107675	SL3.0ch01	95036779	95038779	+	581	579	502	741	50.086	40.386	-9.70004	1.20638e-05	-0.666871	-1.5134	0.481831	1
Solyc01g107730	SL3.0ch01	95075164	95077164	-	772	943	608	885	45.015	40.723	-4.2912	0.0290245	-0.557247	4.91143	0.315397	1
Solyc01g107750	SL3.0ch01	95091837	95093837	-	229	524	117	411	30.412	22.159	-8.2526	0.00324425	0.0138087	7.15545	0.962034	1
Solyc01g107760	SL3.0ch01	95095429	95097429	-	26	127	3	100	16.993	2.913	-14.0808	0.00144669	1.32167	-2.62999	0.478648	1
Solyc01g107770	SL3.0ch01	95097126	95099126	-	34	10	37	77	77.273	32.456	-44.8166	2.8737e-06	3.01283	-3.45833	0.511429	1
Solyc01g107860	SL3.0ch01	95151341	95153341	-	1946	540	1716	667	78.278	72.01	-6.26829	3.1822e-06	-0.204245	5.51892	0.567723	1
Solyc01g107870	SL3.0ch01	95152886	95154886	+	1796	567	1460	627	76.005	69.957	-6.0482	3.59419e-05	-0.0383617	9.65053	0.893417	1
Solyc01g107910	SL3.0ch01	95192129	95194129	-	775	550	690	587	58.491	54.033	-4.45768	0.0426772	-1.47831	3.98318	0.00959976	0.468437
Solyc01g107920	SL3.0ch01	95200917	95202917	-	443	590	290	511	42.885	36.205	-6.68006	0.00954095	0.233209	1.87832	0.667777	1
Solyc01g107930	SL3.0ch01	95202879	95204879	+	811	865	538	878	48.389	37.994	-10.3947	7.07958e-08	0.147067	4.38777	0.627972	1
Solyc01g107933	SL3.0ch01	95202903	95204903	+	811	865	538	878	48.389	37.994	-10.3947	7.07958e-08	0	-3.86962	1	1
Solyc01g107961	SL3.0ch01	95235266	95237266	+	1011	400	893	493	71.651	64.43	-7.2213	0.000218271	0	-3.91086	1	1
Solyc01g107962	SL3.0ch01	95242440	95244440	+	1180	649	733	794	64.516	48.003	-16.5135	2.95219e-20	0	-3.91086	1	1
Solyc01g107964	SL3.0ch01	95243356	95245356	+	573	588	406	627	49.354	39.303	-10.051	1.6323e-05	0	-3.91086	1	1
Solyc01g107980	SL3.0ch01	95257650	95259650	-	48	561	14	400	7.882	3.382	-4.50013	0.00774604	0.0355033	5.35926	0.928752	1
Solyc01g107990	SL3.0ch01	95274402	95276402	-	1618	733	1234	800	68.822	60.669	-8.15314	1.74371e-07	0.0894179	4.06996	0.816369	1
Solyc01g108260	SL3.0ch01	95522468	95524468	-	518	328	476	399	61.229	54.4	-6.82931	0.0109112	-0.183243	5.93696	0.556836	1
Solyc01g108310	SL3.0ch01	95560494	95562494	+	1580	633	1143	822	71.396	58.168	-13.2284	1.37776e-17	0	-3.86959	1	1
Solyc01g108350	SL3.0ch01	95585059	95587059	+	33	15	0	12	68.75	0	-68.75	6.45979e-05	-2.26904	-3.22301	0.556215	1
Solyc01g108360	SL3.0ch01	95590187	95592187	+	1506	296	1573	392	83.574	80.051	-3.52292	0.0122967	2.90268	-2.99864	0.208413	1
Solyc01g108530	SL3.0ch01	95721112	95723112	+	5717	515	4792	501	91.736	90.535	-1.20153	0.0437078	0.474863	5.22786	0.2215	1
Solyc01g108600	SL3.0ch01	95744573	95746573	+	2122	256	1669	260	89.235	86.522	-2.71314	0.015687	-0.284638	6.64772	0.360921	1
Solyc01g108660	SL3.0ch01	95790479	95792479	-	120	142	62	133	45.802	31.795	-14.0067	0.00703968	-0.385791	5.93735	0.158656	1
Solyc01g108745	SL3.0ch01	95853891	95855891	-	10	0	10	10	100	50	-50	0.0224621	0.967597	-1.97655	0.541894	1
Solyc01g108765	SL3.0ch01	95858681	95860681	-	162	175	85	181	48.071	31.955	-16.1163	0.000273073	0	-3.91086	1	1
Solyc01g108790	SL3.0ch01	95889454	95891454	+	390	605	275	580	39.196	32.164	-7.03224	0.00507013	0.430224	-2.13967	0.615596	1
Solyc01g108800	SL3.0ch01	95893276	95895276	+	1011	417	764	500	70.798	60.443	-10.3553	1.6925e-07	-0.432368	-3.2663	1	1
Solyc01g108810	SL3.0ch01	95906602	95908602	-	29	34	3	67	46.032	4.286	-41.746	8.08172e-08	0	-3.86778	1	1
Solyc01g108850	SL3.0ch01	95922928	95924928	-	288	106	210	136	73.096	60.694	-12.4028	0.00135536	0.385228	-3.01313	1	1
Solyc01g108920	SL3.0ch01	95959975	95961975	+	1408	246	1378	334	85.127	80.491	-4.63631	0.00126171	0	-3.86962	1	1
Solyc01g108940	SL3.0ch01	95959975	95961975	+	1408	246	1378	334	85.127	80.491	-4.63631	0.00126171	-0.39787	1.83194	0.378276	1
Solyc01g108930	SL3.0ch01	95975370	95977370	+	35	126	18	136	21.739	11.688	-10.0508	0.0412618	0	-3.91086	1	1
Solyc01g108973	SL3.0ch01	95997198	95999198	-	810	139	677	164	85.353	80.499	-4.8536	0.0147623	-0.240124	-1.47525	0.848804	1
Solyc01g109030	SL3.0ch01	96019694	96021694	+	591	63	388	129	90.367	75.048	-15.3186	4.03768e-11	0	-3.91086	1	1
Solyc01g109050	SL3.0ch01	96026505	96028505	-	14	107	1	88	11.57	1.124	-10.4467	0.00690768	0.756842	0.727498	0.199627	1
Solyc01g109130	SL3.0ch01	96086864	96088864	+	269	334	219	378	44.61	36.683	-7.92686	0.0130675	0.242327	4.92242	0.425152	1
Solyc01g109150	SL3.0ch01	96116671	96118671	+	616	723	498	772	46.004	39.213	-6.79188	0.00161576	0	-2.53314	1	1
Solyc01g109160	SL3.0ch01	96124389	96126389	+	299	830	202	735	26.484	21.558	-4.92545	0.0206702	-0.233112	1.42888	0.761328	1
Solyc01g109220	SL3.0ch01	96143581	96145581	+	1578	625	1313	605	71.63	68.457	-3.17287	0.0460282	-0.0917548	2.45376	0.858921	1
Solyc01g109270	SL3.0ch01	96176533	96178533	-	2610	710	1641	717	78.614	69.593	-9.02158	3.37058e-13	0	-3.91086	1	1
Solyc01g109320	SL3.0ch01	96213628	96215628	-	389	599	231	701	39.372	24.785	-14.5871	1.1752e-10	1.83465	-0.840941	1	1
Solyc01g109350	SL3.0ch01	96246196	96248196	-	898	267	673	443	77.082	60.305	-16.7769	1.30611e-16	0.244975	6.8416	0.34602	1
Solyc01g109370	SL3.0ch01	96258663	96260663	+	425	475	281	416	47.222	40.316	-6.90658	0.0137754	-0.165138	2.02108	0.786822	1
Solyc01g109410	SL3.0ch01	96297439	96299439	-	62	10	35	105	86.111	25	-61.1111	1.3145e-16	0.344855	7.4983	0.191396	1
Solyc01g109420	SL3.0ch01	96297439	96299439	-	62	10	35	105	86.111	25	-61.1111	1.3145e-16	0.920755	-0.78595	0.236313	1
Solyc01g109540	SL3.0ch01	96365630	96367630	+	78	137	66	209	36.279	24	-12.2791	0.00907006	-0.118833	7.6487	0.680835	1
Solyc01g109570	SL3.0ch01	96396548	96398548	-	356	723	212	665	32.994	24.173	-8.82019	9.95513e-05	0.0660552	5.94569	0.854066	1
Solyc01g109600	SL3.0ch01	96410244	96412244	+	313	388	230	413	44.65	35.77	-8.88067	0.00303367	-0.278403	5.91631	0.422198	1
Solyc01g109770	SL3.0ch01	96540965	96542965	-	2457	833	1967	808	74.681	70.883	-3.79797	0.00282917	-0.0702256	6.71853	0.800739	1
Solyc01g109795	SL3.0ch01	96550488	96552488	-	121	70	0	14	63.351	0	-63.3508	1.18069e-05	0	-3.91086	1	1
Solyc01g109800	SL3.0ch01	96575044	96577044	+	519	417	387	415	55.449	48.254	-7.19435	0.00723083	-0.149381	3.82225	0.810446	1
Solyc01g109890	SL3.0ch01	96647708	96649708	+	834	501	828	600	62.472	57.983	-4.48872	0.0331787	-0.0472229	6.33175	0.898104	1
Solyc01g109900	SL3.0ch01	96656162	96658162	+	374	350	283	373	51.657	43.14	-8.51721	0.00479304	1.97453	-0.409257	0.16002	1
Solyc01g109980	SL3.0ch01	96716610	96718610	-	1167	254	1066	328	82.125	76.471	-5.65468	0.000843887	-0.153439	5.21466	0.588629	1
Solyc01g110000	SL3.0ch01	96738691	96740691	+	207	474	148	482	30.396	23.492	-6.90441	0.0119268	-0.287148	6.11979	0.552068	1
Solyc01g110060	SL3.0ch01	96775794	96777794	-	1280	635	1071	715	66.841	59.966	-6.87433	7.31526e-05	-0.541167	0.565712	0.541668	1
Solyc01g110280	SL3.0ch01	96915274	96917274	-	1228	323	940	355	79.175	72.587	-6.58785	0.000210119	0.164259	2.03047	0.762238	1
Solyc01g110310	SL3.0ch01	96958534	96960534	+	373	1035	293	1049	26.491	21.833	-4.65839	0.0104631	0.21649	5.85868	0.492971	1
Solyc01g110320	SL3.0ch01	96968424	96970424	-	1805	761	1333	767	70.343	63.476	-6.86676	4.95317e-06	1.80161	-3.83674	1	1
Solyc01g110370	SL3.0ch01	97006412	97008412	-	684	495	585	529	58.015	52.513	-5.5018	0.0175234	-0.0687272	4.32743	0.864835	1
Solyc01g110385	SL3.0ch01	97019497	97021497	+	179	223	71	218	44.527	24.567	-19.9599	5.65718e-07	-0.0901883	7.60462	0.736015	1
Solyc01g110400	SL3.0ch01	97028542	97030542	-	47	377	18	315	11.085	5.405	-5.6795	0.0133605	0.13502	3.80517	0.726164	1
Solyc01g110410	SL3.0ch01	97034991	97036991	-	593	588	392	559	50.212	41.22	-8.99192	0.000179963	0.0516269	7.24343	0.848176	1
Solyc01g110480	SL3.0ch01	97091043	97093043	+	596	832	462	790	41.737	36.901	-4.83574	0.0228798	0.117194	6.753	0.750789	1
Solyc01g110688	SL3.0ch01	97228488	97230488	-	1023	244	1038	335	80.742	75.601	-5.14104	0.00445818	1.82198	-1.21416	0.0745868	1
Solyc01g110760	SL3.0ch01	97254119	97256119	-	427	239	399	286	64.114	58.248	-5.86594	0.0499002	0.375978	-2.42265	0.826337	1
Solyc01g110810	SL3.0ch01	97264586	97266586	-	75	0	70	19	100	78.652	-21.3483	3.37881e-05	-0.105104	1.8281	0.828316	1
Solyc01g110980	SL3.0ch01	97325415	97327415	+	21	1	19	14	95.455	57.576	-37.8788	0.00519963	-1.34754	-3.21735	0.306525	1
Solyc01g110990	SL3.0ch01	97326483	97328483	+	154	226	119	259	40.526	31.481	-9.04483	0.0210518	0.476149	5.026	0.126766	1
Solyc01g111020	SL3.0ch01	97354556	97356556	-	2987	1582	2772	1625	65.375	63.043	-2.33237	0.0393472	-0.697476	5.81617	0.0208408	0.682632
Solyc01g111190	SL3.0ch01	97442867	97444867	+	1623	661	1396	684	71.06	67.115	-3.94416	0.0121592	-0.116754	3.10559	0.768255	1
Solyc01g111200	SL3.0ch01	97449366	97451366	+	567	374	512	416	60.255	55.172	-5.08263	0.0475643	0.152129	6.88637	0.569881	1
Solyc01g111220	SL3.0ch01	97459820	97461820	+	92	92	33	137	50	19.412	-30.5882	1.58306e-08	-0.580755	1.95536	0.543313	1
Solyc01g111230	SL3.0ch01	97464217	97466217	+	927	819	777	866	53.093	47.292	-5.80124	0.00234335	0.0282057	5.87202	0.963973	1
Solyc01g111240	SL3.0ch01	97475308	97477308	-	701	666	482	632	51.28	43.268	-8.01267	0.000313967	0.0233492	6.86829	0.93807	1
Solyc01g111250	SL3.0ch01	97475780	97477780	+	663	941	461	843	41.334	35.353	-5.9814	0.00296509	0.779881	6.52697	0.0394047	0.918664
Solyc01g111320	SL3.0ch01	97516409	97518409	+	752	316	629	375	70.412	62.649	-7.76258	0.000711149	0.150975	4.25595	0.630896	1
Solyc01g111330	SL3.0ch01	97516409	97518409	+	752	316	629	375	70.412	62.649	-7.76258	0.000711149	-4.31944	-1.82577	0.00946517	0.464404
Solyc01g111360	SL3.0ch01	97548054	97550054	+	137	1203	60	1007	10.224	5.623	-4.60064	0.000165776	-0.0226673	5.04912	0.945453	1
Solyc01g111380	SL3.0ch01	97560847	97562847	+	355	249	275	277	58.775	49.819	-8.95599	0.00662887	0.371313	4.67971	0.303554	1
Solyc01g111430	SL3.0ch01	97594119	97596119	-	51	264	18	201	16.19	8.219	-7.9713	0.0178872	-0.198134	0.74134	0.777375	1
Solyc01g111510	SL3.0ch01	97653258	97655258	-	913	736	831	786	55.367	51.391	-3.97542	0.0434195	-0.245148	7.53774	0.433446	1
Solyc01g111570	SL3.0ch01	97710136	97712136	+	297	833	186	741	26.283	20.065	-6.21846	0.00293473	-0.750649	4.50062	0.107982	1
Solyc01g111590	SL3.0ch01	97729226	97731226	-	131	181	75	226	41.987	24.917	-17.0702	4.5206e-05	0.489569	-0.905179	0.680099	1
Solyc01g111600	SL3.0ch01	97732859	97734859	-	1015	767	842	755	56.958	52.724	-4.23462	0.0272246	0.164161	5.97312	0.604224	1
Solyc01g111640	SL3.0ch01	97765836	97767836	+	823	373	382	466	68.813	45.047	-23.7655	3.9894e-25	0.801192	-0.328235	0.420529	1
Solyc01g111690	SL3.0ch01	97793493	97795493	+	214	653	89	735	24.683	10.801	-13.8818	1.30872e-12	-0.0966175	3.44155	0.772685	1
Solyc01g111700	SL3.0ch01	97803306	97805306	-	13	327	2	314	3.824	0.633	-3.19062	0.0160077	1.03051	-1.54587	0.270841	1
Solyc01g111820	SL3.0ch01	97893374	97895374	+	119	470	91	561	20.204	13.957	-6.24668	0.00948341	0	-3.7556	1	1
Solyc01g111880	SL3.0ch01	97963709	97965709	-	297	678	181	528	30.462	25.529	-4.93262	0.0486595	-1.40307	3.46359	0.0231837	0.721269
Solyc01g111950	SL3.0ch01	98012919	98014919	+	262	13	291	68	95.273	81.058	-14.2142	3.10658e-07	-0.524823	0.0487212	0.625617	1
Solyc01g111970	SL3.0ch01	98025336	98027336	-	194	496	122	435	28.116	21.903	-6.21289	0.0254745	1.50477	5.67059	0.0180752	0.648666
Solyc01g112000	SL3.0ch01	98047263	98049263	+	336	828	287	918	28.866	23.817	-5.04855	0.0133331	-0.0405295	7.17932	0.935245	1
Solyc01g112070	SL3.0ch01	98097506	98099506	-	271	580	216	612	31.845	26.087	-5.75793	0.020515	0.895109	1.01274	0.375733	1
Solyc01g112100	SL3.0ch01	98117373	98119373	-	1347	672	933	814	66.716	53.406	-13.3104	2.64314e-15	0	-3.91086	1	1
Solyc01g112370	SL3.0ch01	98369464	98371464	-	985	32	1282	69	96.853	94.893	-1.96082	0.0414779	0.812551	-2.42944	0.539892	1
Solyc02g044010	SL3.0ch02	156657	158657	+	836	76	675	90	91.667	88.235	-3.43137	0.0386187	0	-3.91086	1	1
Solyc02g043990	SL3.0ch02	235829	237829	+	173	688	79	652	20.093	10.807	-9.2858	3.05491e-06	0	-3.91086	1	1
Solyc02g043900	SL3.0ch02	959286	961286	-	180	678	135	722	20.979	15.753	-5.2264	0.0136159	0	-3.91086	1	1
Solyc02g043815	SL3.0ch02	1676887	1678887	+	17	0	42	110	100	27.632	-72.3684	3.27643e-08	0	-3.91086	1	1
Solyc02g055560	SL3.0ch02	2209022	2211022	+	421	70	402	98	85.743	80.4	-5.34338	0.0474091	0	-3.91086	1	1
Solyc02g050205	SL3.0ch02	4550667	4552667	+	1626	93	1299	124	94.59	91.286	-3.30386	0.00106504	0.354488	3.78592	0.379608	1
Solyc02g005000	SL3.0ch02	5968713	5970713	+	858	101	707	117	89.468	85.801	-3.66723	0.0369618	0	-3.91086	1	1
Solyc02g005395	SL3.0ch02	8617469	8619469	-	910	84	683	122	91.549	84.845	-6.70458	5.47625e-05	0	-3.91086	1	1
Solyc02g005400	SL3.0ch02	8617811	8619811	-	874	72	656	119	92.389	84.645	-7.74385	3.16424e-06	0	-3.91086	1	1
Solyc02g005517	SL3.0ch02	9556213	9558213	-	544	62	362	89	89.769	80.266	-9.5029	8.71894e-05	-5.49049	-3.08632	0.015079	0.592039
Solyc02g005555	SL3.0ch02	9681917	9683917	-	806	57	1133	116	93.395	90.713	-2.68256	0.0494975	0	-3.91086	1	1
Solyc02g005605	SL3.0ch02	13257983	13259983	+	878	53	1136	129	94.307	89.802	-4.50483	0.000605648	0	-3.91086	1	1
Solyc02g014060	SL3.0ch02	15350259	15352259	-	1187	49	1051	74	96.036	93.422	-2.61338	0.0121048	-3.40069	-3.73553	0.404531	1
Solyc02g014140	SL3.0ch02	15646945	15648945	+	653	65	376	58	90.947	86.636	-4.31113	0.0418755	0	-3.91086	1	1
Solyc02g014255	SL3.0ch02	16145301	16147301	+	673	160	571	223	80.792	71.914	-8.87796	0.000120877	0	-3.91086	1	1
Solyc02g014300	SL3.0ch02	16201281	16203281	+	1302	150	1146	194	89.669	85.522	-4.14703	0.00297589	-1.05694	-2.54747	0.392611	1
Solyc02g014355	SL3.0ch02	16286174	16288174	+	46	5	21	10	90.196	67.742	-22.4541	0.0324954	-0.0167653	3.5036	0.962746	1
Solyc02g014450	SL3.0ch02	17094514	17096514	+	2226	318	1810	359	87.5	83.449	-4.05141	0.000363325	1.27669	-0.141727	0.279952	1
Solyc02g014455	SL3.0ch02	17097849	17099849	+	437	41	338	72	91.423	82.439	-8.98357	0.000308983	-0.128948	2.92284	0.781791	1
Solyc02g014545	SL3.0ch02	17612567	17614567	+	711	90	647	233	88.764	73.523	-15.2413	2.61108e-14	0	-3.91086	1	1
Solyc02g014630	SL3.0ch02	18038480	18040480	+	260	25	154	30	91.228	83.696	-7.53242	0.0338098	0	-3.91086	1	1
Solyc02g014670	SL3.0ch02	18128117	18130117	+	1002	99	718	102	91.008	87.561	-3.4472	0.0303176	-0.975241	-1.81717	0.345535	1
Solyc02g014740	SL3.0ch02	18503348	18505348	+	656	864	454	994	43.158	31.354	-11.8043	4.42024e-10	-1.79672	-3.71918	1	1
Solyc02g014840	SL3.0ch02	19143831	19145831	+	197	267	55	167	42.457	24.775	-17.6821	3.70295e-05	0.125616	3.1475	0.813096	1
Solyc02g014843	SL3.0ch02	19186284	19188284	+	1614	70	1281	81	95.843	94.053	-1.79037	0.0489226	-5.96705	-3.04292	0.00237281	0.196006
Solyc02g021170	SL3.0ch02	22318246	22320246	-	1360	79	947	91	94.51	91.233	-3.27694	0.00458607	0	-3.91086	1	1
Solyc02g021350	SL3.0ch02	22991031	22993031	+	1162	869	878	927	57.213	48.643	-8.57054	1.00306e-06	0	-1.05344	1	1
Solyc02g021360	SL3.0ch02	23023210	23025210	-	1535	124	1339	198	92.526	87.118	-5.40786	2.80428e-06	-0.153362	4.01547	0.640999	1
Solyc02g021368	SL3.0ch02	23061253	23063253	-	1167	51	991	90	95.813	91.674	-4.13843	0.000175719	0	-3.91086	1	1
Solyc02g021640	SL3.0ch02	23820427	23822427	-	797	561	622	524	58.689	54.276	-4.41351	0.0490057	-0.302771	4.09286	0.343365	1
Solyc02g021670	SL3.0ch02	23972136	23974136	+	387	22	196	38	94.621	83.761	-10.8603	4.94422e-05	1.23788	-2.64753	0.400167	1
Solyc02g021680	SL3.0ch02	23981115	23983115	+	496	555	339	477	47.193	41.544	-5.64903	0.0316362	0.433824	2.59886	0.46605	1
Solyc02g021780	SL3.0ch02	24365809	24367809	+	672	116	486	173	85.279	73.748	-11.5311	4.65065e-07	0	-3.91086	1	1
Solyc02g022860	SL3.0ch02	24749992	24751992	+	862	429	836	517	66.77	61.789	-4.98133	0.0178354	0	-3.91086	1	1
Solyc02g022870	SL3.0ch02	24764076	24766076	-	354	144	236	199	71.084	54.253	-16.8315	8.77886e-07	0.0673995	4.67097	0.821483	1
Solyc02g024010	SL3.0ch02	25271859	25273859	+	770	104	709	190	88.101	78.865	-9.23528	1.54351e-06	0.0734402	3.05701	0.885595	1
Solyc02g030130	SL3.0ch02	25667570	25669570	-	1381	108	1350	157	92.747	89.582	-3.16486	0.00641239	-2.29315	-2.90453	0.22622	1
Solyc02g030215	SL3.0ch02	25804382	25806382	+	455	169	377	227	72.917	62.417	-10.4994	0.000376611	-0.264881	-1.9138	0.933116	1
Solyc02g030250	SL3.0ch02	25937797	25939797	-	902	123	819	170	88	82.811	-5.18908	0.00298316	0.074068	6.21276	0.807697	1
Solyc02g030360	SL3.0ch02	26015699	26017699	+	273	34	193	50	88.925	79.424	-9.50121	0.00696914	-0.422849	-0.507351	0.504252	1
Solyc02g030370	SL3.0ch02	26060940	26062940	-	1074	595	888	599	64.35	59.718	-4.63236	0.0174483	0	-3.91086	1	1
Solyc02g030380	SL3.0ch02	26099124	26101124	+	918	167	807	206	84.608	79.664	-4.94393	0.00868993	1.50174	-0.806224	0.131836	1
Solyc02g030464	SL3.0ch02	26483064	26485064	-	1184	152	1273	214	88.623	85.609	-3.01415	0.0342566	5.43867	-3.10554	0.0100239	0.478683
Solyc02g030510	SL3.0ch02	26761625	26763625	+	674	47	584	64	93.481	90.123	-3.35782	0.0489263	-4.12052	-3.56247	0.148689	1
Solyc02g030505	SL3.0ch02	26761658	26763658	+	674	47	584	64	93.481	90.123	-3.35782	0.0489263	0.24708	-2.31629	0.88303	1
Solyc02g031890	SL3.0ch02	27627566	27629566	+	909	86	619	103	91.357	85.734	-5.62271	0.00108623	-1.05654	-1.86745	0.266899	1
Solyc02g032105	SL3.0ch02	28002460	28004460	+	1119	76	895	88	93.64	91.048	-2.59235	0.0470056	0	-3.91086	1	1
Solyc02g032250	SL3.0ch02	28537743	28539743	-	428	821	178	717	34.267	19.888	-14.3791	3.30876e-12	0	-3.91086	1	1
Solyc02g032333	SL3.0ch02	28722619	28724619	+	178	11	49	13	94.18	79.032	-15.1476	0.00493852	0	-3.91086	1	1
Solyc02g032410	SL3.0ch02	28930560	28932560	-	739	251	481	214	74.646	69.209	-5.43783	0.0287202	0.460535	-2.6647	0.759509	1
Solyc02g032850	SL3.0ch02	29899499	29901499	+	1701	267	1622	319	86.433	83.565	-2.86775	0.0243395	0.320899	4.08204	0.431981	1
Solyc02g032860	SL3.0ch02	29911879	29913879	+	1112	181	778	252	86.002	75.534	-10.4676	1.98046e-09	0.660992	5.10812	0.354949	1
Solyc02g036310	SL3.0ch02	30974541	30976541	-	191	36	136	112	84.141	54.839	-29.3023	6.49228e-11	0.400081	3.08853	0.399215	1
Solyc02g036350	SL3.0ch02	31050613	31052613	+	375	647	237	657	36.693	26.51	-10.1827	1.17015e-05	1.26912	10.0062	0.0879027	1
Solyc02g036450	SL3.0ch02	31273565	31275565	-	1296	80	1114	100	94.186	91.763	-2.42328	0.0311831	0.181894	5.34245	0.518528	1
Solyc02g038710	SL3.0ch02	31914884	31916884	-	953	185	672	192	83.743	77.778	-5.96563	0.00247328	-2.56618	-3.63116	0.625551	1
Solyc02g038760	SL3.0ch02	32014421	32016421	+	2663	197	2281	224	93.112	91.058	-2.054	0.0134957	0.303479	4.56343	0.317346	1
Solyc00g007305	SL3.0ch02	32463668	32465668	+	1231	182	919	176	87.12	83.927	-3.19266	0.0435154	0	-3.91086	1	1
Solyc00g007195	SL3.0ch02	32600972	32602972	+	197	7	106	20	96.569	84.127	-12.4416	0.000444317	1.23489	-0.402531	0.11295	1
Solyc02g060570	SL3.0ch02	33564404	33566404	-	871	45	689	61	95.087	91.867	-3.22067	0.0182254	-3.5215	-3.38697	0.109644	1
Solyc02g060580	SL3.0ch02	33584741	33586741	-	751	52	712	78	93.524	90.127	-3.3977	0.0265717	-1.93933	-3.87098	1	1
Solyc02g060595	SL3.0ch02	33614888	33616888	-	445	32	483	63	93.291	88.462	-4.82987	0.0195833	0	-3.91086	1	1
Solyc02g061600	SL3.0ch02	33636092	33638092	-	297	84	177	79	77.953	69.141	-8.81213	0.0303593	0	-3.91086	1	1
Solyc02g061660	SL3.0ch02	33709435	33711435	-	239	47	96	119	83.566	44.651	-38.9153	1.42597e-18	0	-3.91086	1	1
Solyc02g061780	SL3.0ch02	33842854	33844854	-	1280	454	1073	479	73.818	69.137	-4.68116	0.00804791	1.12239	-0.185291	0.284663	1
Solyc02g061800	SL3.0ch02	33853814	33855814	+	234	151	144	160	60.779	47.368	-13.4108	0.0016842	1.62716	-2.84782	0.437463	1
Solyc02g061920	SL3.0ch02	34021616	34023616	+	1437	251	1262	320	85.13	79.772	-5.35789	0.000257768	0	-3.86883	1	1
Solyc02g062020	SL3.0ch02	34151748	34153748	-	972	759	675	748	56.153	47.435	-8.71752	7.29582e-06	-0.415176	4.60575	0.244586	1
Solyc02g062040	SL3.0ch02	34161123	34163123	-	2027	365	1604	393	84.741	80.32	-4.42032	0.000536309	-0.177251	4.75796	0.571229	1
Solyc02g062090	SL3.0ch02	34211268	34213268	+	1649	358	1322	363	82.162	78.457	-3.70546	0.0120599	1.52009	-1.38358	0.106258	1
Solyc02g062110	SL3.0ch02	34250277	34252277	-	614	251	522	364	70.983	58.916	-12.0662	1.11211e-06	0.221473	5.52016	0.39833	1
Solyc02g062130	SL3.0ch02	34250277	34252277	-	614	251	522	364	70.983	58.916	-12.0662	1.11211e-06	-0.780748	0.656956	0.108308	1
Solyc02g062140	SL3.0ch02	34253891	34255891	-	359	1000	279	1068	26.416	20.713	-5.70379	0.00160122	-0.255287	5.68631	0.330247	1
Solyc02g062200	SL3.0ch02	34338764	34340764	-	1701	309	1384	364	84.627	79.176	-5.45066	8.10044e-05	0	-3.87049	1	1
Solyc02g062370	SL3.0ch02	34511975	34513975	+	228	666	164	639	25.503	20.423	-5.07994	0.0260593	0.570823	3.05411	0.373606	1
Solyc02g062580	SL3.0ch02	34845408	34847408	+	21	24	0	17	46.667	0	-46.6667	0.00084958	0.38416	1.68458	0.396356	1
Solyc02g062590	SL3.0ch02	34857393	34859393	-	979	916	633	1040	51.662	37.836	-13.826	3.46296e-15	-2.65321	-3.3412	0.188877	1
Solyc02g062620	SL3.0ch02	34912181	34914181	-	596	294	474	343	66.966	58.017	-8.94916	0.000548407	0.158055	6.7926	0.545109	1
Solyc02g062710	SL3.0ch02	34989102	34991102	+	1022	419	850	456	70.923	65.084	-5.83874	0.00346124	-0.252058	0.792551	0.839117	1
Solyc02g062860	SL3.0ch02	35342164	35344164	-	793	288	609	391	73.358	60.9	-12.458	1.6994e-08	0	-3.91086	1	1
Solyc02g062870	SL3.0ch02	35348994	35350994	+	943	93	827	119	91.023	87.421	-3.60245	0.0221341	0	-3.86689	1	1
Solyc02g062875	SL3.0ch02	35359072	35361072	-	1844	124	1854	185	93.699	90.927	-2.77226	0.00323424	0	-3.91086	1	1
Solyc02g062880	SL3.0ch02	35358304	35360304	-	1473	99	1490	211	93.702	87.596	-6.10676	2.03887e-08	0	-3.91086	1	1
Solyc02g062910	SL3.0ch02	35394549	35396549	-	1206	190	984	216	86.39	82	-4.38968	0.00625385	0.436352	4.30599	0.219765	1
Solyc02g062950	SL3.0ch02	35445561	35447561	-	617	391	559	463	61.21	54.697	-6.51364	0.00760825	0.19721	5.30032	0.474312	1
Solyc02g062960	SL3.0ch02	35481648	35483648	-	1337	654	1095	691	67.152	61.31	-5.84199	0.000760587	-7.95026	-2.09695	0.00152466	0.146798
Solyc02g062970	SL3.0ch02	35501253	35503253	+	1566	92	1317	108	94.451	92.421	-2.03009	0.0410933	0.125846	8.26495	0.650489	1
Solyc02g062980	SL3.0ch02	35514780	35516780	-	569	958	427	908	37.263	31.985	-5.27759	0.00796419	0	-3.91086	1	1
Solyc02g063000	SL3.0ch02	35566351	35568351	-	2090	622	1767	656	77.065	72.926	-4.13877	0.00215083	2.65736	-0.226777	0.0569274	1
Solyc02g063030	SL3.0ch02	35597192	35599192	-	392	718	271	696	35.315	28.025	-7.2905	0.00135256	-0.980951	2.95171	0.151494	1
Solyc02g063090	SL3.0ch02	35699013	35701013	+	294	15	251	55	95.146	82.026	-13.1195	1.61229e-06	0.208087	6.32039	0.447384	1
Solyc02g063100	SL3.0ch02	35711354	35713354	-	211	10	3	37	95.475	7.5	-87.9751	2.94416e-30	0	-3.83186	1	1
Solyc02g063125	SL3.0ch02	35711806	35713806	+	81	21	3	50	79.412	5.66	-73.7514	1.67089e-18	0	-3.76338	1	1
Solyc02g063210	SL3.0ch02	35813730	35815730	-	690	430	384	368	61.607	51.064	-10.5433	4.01745e-05	-3.61567	-3.72598	0.414927	1
Solyc02g063280	SL3.0ch02	35897417	35899417	+	595	258	433	261	69.754	62.392	-7.36188	0.00636746	0.607644	4.54682	0.0505688	1
Solyc02g063320	SL3.0ch02	35921269	35923269	-	647	969	414	917	40.037	31.104	-8.9327	3.72641e-06	1.14385	0.467958	0.236117	1
Solyc02g063330	SL3.0ch02	35941051	35943051	+	613	390	448	404	61.117	52.582	-8.53449	0.000863249	-0.581375	0.709114	0.298068	1
Solyc02g063340	SL3.0ch02	35946931	35948931	-	1111	391	819	380	73.968	68.307	-5.66112	0.00372688	0	-3.91086	1	1
Solyc02g063460	SL3.0ch02	36102372	36104372	+	1372	99	1114	159	93.27	87.51	-5.76007	2.03463e-06	0.0826738	3.95184	0.82436	1
Solyc02g063470	SL3.0ch02	36103447	36105447	+	552	148	384	170	78.857	69.314	-9.54306	0.000566001	-4.16438	-3.59505	0.310847	1
Solyc02g064570	SL3.0ch02	36248298	36250298	-	996	1002	886	1106	49.85	44.478	-5.37194	0.0021685	0	-3.8303	1	1
Solyc02g064640	SL3.0ch02	36305406	36307406	-	555	322	606	530	63.284	53.345	-9.93885	4.44927e-05	-0.0879249	-3.16583	1	1
Solyc02g064650	SL3.0ch02	36305411	36307411	-	555	322	606	530	63.284	53.345	-9.93885	4.44927e-05	-0.651488	0.308934	0.362506	1
Solyc02g064670	SL3.0ch02	36315954	36317954	+	1380	114	1374	237	92.369	85.289	-7.08084	4.38564e-09	0.284885	7.19699	0.353706	1
Solyc02g064802	SL3.0ch02	36521415	36523415	-	73	27	5	17	73	22.727	-50.2727	0.000149614	0.332078	-2.83897	0.888583	1
Solyc02g064804	SL3.0ch02	36522282	36524282	-	39	26	0	12	60	0	-60	0.000310123	4.50122	-3.08174	0.0769676	1
Solyc02g064810	SL3.0ch02	36522282	36524282	-	39	26	0	12	60	0	-60	0.000310123	-1.66322	-3.21676	0.541256	1
Solyc02g064910	SL3.0ch02	36577004	36579004	+	1757	130	1553	179	93.111	89.665	-3.44563	0.000797345	0	-3.91086	1	1
Solyc02g064955	SL3.0ch02	36616977	36618977	-	533	711	415	725	42.846	36.404	-6.44215	0.00410187	0	-3.91086	1	1
Solyc02g065020	SL3.0ch02	36705151	36707151	+	1042	593	861	593	63.731	59.216	-4.51493	0.0217452	-5.29277	-1.80034	0.0206299	0.681096
Solyc02g065050	SL3.0ch02	36736469	36738469	-	704	273	596	294	72.057	66.966	-5.09103	0.033504	-0.0280888	-2.25186	1	1
Solyc02g065210	SL3.0ch02	36954260	36956260	-	916	56	907	91	94.239	90.882	-3.35692	0.0109456	0	-3.91086	1	1
Solyc02g065230	SL3.0ch02	36968079	36970079	+	905	612	777	623	59.657	55.5	-4.15722	0.0429714	-0.529999	0.438265	0.719825	1
Solyc02g065280	SL3.0ch02	37008908	37010908	+	978	340	695	312	74.203	69.017	-5.18646	0.0135941	-5.08366	4.52317	1.69337e-08	1.08158e-05
Solyc02g065300	SL3.0ch02	37057038	37059038	+	1002	72	923	117	93.296	88.75	-4.54609	0.00111648	0.104114	7.39444	0.715335	1
Solyc02g065410	SL3.0ch02	37147617	37149617	-	1222	688	1082	891	63.979	54.84	-9.13871	7.26724e-08	0.605661	1.96958	0.202008	1
Solyc02g065420	SL3.0ch02	37146910	37148910	+	2092	421	2005	490	83.247	80.361	-2.88639	0.017884	0.308725	4.57331	0.408232	1
Solyc02g065560	SL3.0ch02	37285760	37287760	+	1063	941	578	846	53.044	40.59	-12.454	1.17032e-11	0.627299	2.67908	0.178164	1
Solyc02g065630	SL3.0ch02	37364095	37366095	-	1863	790	1694	1039	70.222	61.983	-8.23922	2.55621e-09	0.00229616	5.09915	0.994842	1
Solyc02g065640	SL3.0ch02	37364776	37366776	+	1040	790	817	954	56.831	46.132	-10.6985	1.9762e-09	0	-3.91086	1	1
Solyc02g065650	SL3.0ch02	37375774	37377774	-	119	430	46	272	21.676	14.465	-7.21037	0.0194665	-0.0163769	4.13611	0.962245	1
Solyc02g065660	SL3.0ch02	37383326	37385326	-	1155	70	1033	143	94.286	87.84	-6.44558	2.27874e-07	0.35667	4.94557	0.197082	1
Solyc02g066830	SL3.0ch02	37545133	37547133	+	365	415	257	418	46.795	38.074	-8.7208	0.00250561	0.113853	3.9194	0.77778	1
Solyc02g066880	SL3.0ch02	37654610	37656610	+	828	87	790	140	90.492	84.946	-5.54557	0.0010359	0	-3.91086	1	1
Solyc02g066960	SL3.0ch02	37778692	37780692	+	395	19	249	35	95.411	87.676	-7.73457	0.000908235	-3.00007	-3.21994	0.328783	1
Solyc02g067100	SL3.0ch02	37895326	37897326	+	488	81	468	143	85.764	76.596	-9.16875	0.000254365	-0.115626	-0.45789	0.894479	1
Solyc02g067180	SL3.0ch02	37936940	37938940	-	1125	452	1059	555	71.338	65.613	-5.7246	0.00171136	-0.155006	8.57466	0.625709	1
Solyc02g067210	SL3.0ch02	37970586	37972586	-	1291	405	1120	437	76.12	71.933	-4.18708	0.015914	0.0518982	6.28695	0.846071	1
Solyc02g067380	SL3.0ch02	38148388	38150388	+	651	889	467	848	42.273	35.513	-6.75942	0.000920571	-1.42537	-1.75279	0.178042	1
Solyc02g067430	SL3.0ch02	38183476	38185476	-	1697	294	1667	415	85.234	80.067	-5.16631	7.17258e-05	0	-3.91086	1	1
Solyc02g067465	SL3.0ch02	38229121	38231121	-	10	1	1	9	90.909	10	-80.9091	0.0011939	0	-3.91086	1	1
Solyc02g067510	SL3.0ch02	38252770	38254770	+	1034	599	982	713	63.319	57.935	-5.38394	0.00443909	1.76389	-1.14196	0.14683	1
Solyc02g067530	SL3.0ch02	38262079	38264079	+	270	1200	149	1292	18.367	10.34	-8.02731	8.8596e-09	0.193024	4.13853	0.725026	1
Solyc02g067550	SL3.0ch02	38273104	38275104	+	62	79	1	70	43.972	1.408	-42.5632	2.73168e-11	-0.498399	-0.302998	0.603	1
Solyc02g067640	SL3.0ch02	38335383	38337383	+	170	168	111	167	50.296	39.928	-10.3678	0.0236434	0	-3.60824	1	1
Solyc02g067670	SL3.0ch02	38368483	38370483	+	43	110	4	72	28.105	5.263	-22.8414	0.000106011	0.0432396	5.85401	0.883037	1
Solyc02g067680	SL3.0ch02	38379484	38381484	+	114	685	64	601	14.268	9.624	-4.64377	0.0171176	0.182179	1.33366	0.781534	1
Solyc02g067690	SL3.0ch02	38386602	38388602	-	553	940	275	795	37.04	25.701	-11.3386	1.3345e-08	-0.509985	6.19005	0.136704	1
Solyc02g067780	SL3.0ch02	38460742	38462742	+	628	349	597	419	64.278	58.76	-5.51856	0.0255569	-0.496344	1.32505	0.41111	1
Solyc02g067790	SL3.0ch02	38465948	38467948	+	799	423	729	580	65.385	55.691	-9.69325	4.75246e-06	3.83682	1.80274	0.000247418	0.0376076
Solyc02g067820	SL3.0ch02	38506954	38508954	-	1457	859	1200	850	62.91	58.537	-4.3736	0.00793691	-0.204169	5.63144	0.447482	1
Solyc02g067880	SL3.0ch02	38542095	38544095	-	3465	161	3153	306	95.56	91.154	-4.40633	1.41563e-12	1.89923	-3.82938	1	1
Solyc02g067890	SL3.0ch02	38551720	38553720	-	569	657	317	792	46.411	28.584	-17.8268	2.38201e-17	0.00971685	5.38087	0.974824	1
Solyc02g067940	SL3.0ch02	38591727	38593727	+	1003	455	820	654	68.793	55.631	-13.1619	4.49411e-12	0	-3.91086	1	1
Solyc02g068160	SL3.0ch02	38762290	38764290	-	1043	533	930	710	66.18	56.707	-9.47289	3.20551e-07	-0.453876	-1.96967	0.691358	1
Solyc02g068170	SL3.0ch02	38764197	38766197	-	872	572	600	535	60.388	52.863	-7.52438	0.000546221	0.574635	-3.13474	0.837231	1
Solyc02g068180	SL3.0ch02	38766324	38768324	+	2146	277	2157	364	88.568	85.561	-3.00661	0.00474143	-0.238066	4.64033	0.412775	1
Solyc02g068290	SL3.0ch02	38838436	38840436	-	911	427	805	454	68.087	63.94	-4.14706	0.0478372	-0.0831631	1.00858	0.891743	1
Solyc02g068330	SL3.0ch02	38867132	38869132	-	50	28	0	10	64.103	0	-64.1026	0.000423611	0.0267178	-1.10971	1	1
Solyc02g068340	SL3.0ch02	38877131	38879131	-	1832	408	1466	494	81.786	74.796	-6.9898	3.93082e-07	-0.220148	4.04073	0.630956	1
Solyc02g068345	SL3.0ch02	38877470	38879470	-	1932	491	1506	585	79.736	72.023	-7.71291	1.81746e-08	0	-3.91086	1	1
Solyc02g068370	SL3.0ch02	38890071	38892071	+	723	213	660	513	77.244	56.266	-20.9776	1.51565e-22	0.34004	4.62995	0.306603	1
Solyc02g068420	SL3.0ch02	38946881	38948881	-	96	154	50	157	38.4	24.155	-14.2454	0.00361032	0.0949865	7.17572	0.710701	1
Solyc02g068470	SL3.0ch02	38980727	38982727	-	1124	419	970	443	72.845	68.648	-4.19684	0.0263917	5.07566	-0.291293	0.0141481	0.57825
Solyc02g068550	SL3.0ch02	39072306	39074306	-	1061	538	926	560	66.354	62.315	-4.03903	0.036122	0.206501	2.80352	0.611512	1
Solyc02g068560	SL3.0ch02	39097943	39099943	-	824	443	767	516	65.036	59.782	-5.25376	0.0153791	0.321485	5.09705	0.339834	1
Solyc02g068590	SL3.0ch02	39121635	39123635	-	2561	817	2198	870	75.814	71.643	-4.17133	0.000559526	0.504575	6.60579	0.138963	1
Solyc02g068640	SL3.0ch02	39160571	39162571	+	1302	136	1209	173	90.542	87.482	-3.06051	0.0199658	-0.159945	5.71655	0.587821	1
Solyc02g068645	SL3.0ch02	39167788	39169788	-	297	31	214	45	90.549	82.625	-7.9233	0.0139201	0.189311	0.0830412	0.800131	1
Solyc02g068660	SL3.0ch02	39182076	39184076	-	1154	436	825	407	72.579	66.964	-5.61433	0.00398432	-3.64275	-1.31063	0.0129494	0.547961
Solyc02g068680	SL3.0ch02	39190314	39192314	+	1254	659	766	513	65.551	59.891	-5.66095	0.00364976	0.627936	5.02217	0.483478	1
Solyc02g068740	SL3.0ch02	39243311	39245311	-	1200	219	974	306	84.567	76.094	-8.47285	3.0422e-07	-0.172635	6.1281	0.64102	1
Solyc02g068750	SL3.0ch02	39244459	39246459	+	1487	186	1477	274	88.882	84.352	-4.53045	0.000444415	-0.163861	4.84423	0.572936	1
Solyc02g068780	SL3.0ch02	39260598	39262598	+	1617	635	1321	693	71.803	65.591	-6.21198	7.26093e-05	0.325378	5.44107	0.323887	1
Solyc02g068820	SL3.0ch02	39301619	39303619	-	1074	14	1007	32	98.713	96.92	-1.79312	0.0107414	-0.0230761	3.98285	0.949178	1
Solyc02g068830	SL3.0ch02	39314317	39316317	-	822	88	702	164	90.33	81.062	-9.26731	1.88753e-07	2.15319	0.845161	0.0171872	0.631811
Solyc02g068840	SL3.0ch02	39312347	39314347	+	137	29	40	21	82.53	65.574	-16.9563	0.0219833	1.78822	-3.87428	1	1
Solyc02g068863	SL3.0ch02	39326293	39328293	-	78	111	27	109	41.27	19.853	-21.4169	0.000190445	0.145958	1.8265	0.762626	1
Solyc02g068867	SL3.0ch02	39323121	39325121	+	90	4	26	10	95.745	72.222	-23.5225	0.00133402	-2.10345	-2.33317	0.244509	1
Solyc02g068880	SL3.0ch02	39326558	39328558	+	78	111	27	109	41.27	19.853	-21.4169	0.000190445	1.18838	-1.21531	0.170193	1
Solyc02g068900	SL3.0ch02	39343794	39345794	+	283	106	320	219	72.751	59.369	-13.3814	0.00013094	0.383262	6.04203	0.154396	1
Solyc02g069200	SL3.0ch02	39728090	39730090	-	321	349	205	375	47.91	35.345	-12.5656	4.06382e-05	0	-3.75208	1	1
Solyc02g069203	SL3.0ch02	39733695	39735695	-	95	1	83	12	98.958	87.368	-11.5899	0.00362765	0.119358	1.26687	0.867525	1
Solyc02g069300	SL3.0ch02	39805609	39807609	-	728	728	631	807	50	43.88	-6.11961	0.00309176	4.423	-3.45849	0.116766	1
Solyc02g069310	SL3.0ch02	39805498	39807498	+	726	612	627	750	54.26	45.534	-8.72632	3.30891e-05	-0.0347964	5.76724	0.90982	1
Solyc02g069400	SL3.0ch02	39869785	39871785	+	915	611	769	620	59.961	55.364	-4.59711	0.0260507	0.150845	3.82633	0.66553	1
Solyc02g069450	SL3.0ch02	39906558	39908558	-	31	48	13	69	39.241	15.854	-23.3868	0.00375119	-1.05889	-2.54589	0.437064	1
Solyc02g069515	SL3.0ch02	39956084	39958084	+	1534	316	1343	363	82.919	78.722	-4.19676	0.0043969	0.728608	-0.35148	0.278531	1
Solyc02g069570	SL3.0ch02	39981416	39983416	+	1833	504	1426	521	78.434	73.241	-5.19301	0.000318847	0.0197678	2.43074	0.980532	1
Solyc02g069620	SL3.0ch02	40028161	40030161	-	1412	474	1218	514	74.867	70.323	-4.54412	0.00583604	-0.558111	3.51797	0.228051	1
Solyc02g069630	SL3.0ch02	40031044	40033044	+	2419	668	1903	792	78.361	70.612	-7.74862	2.34222e-10	-0.0945495	-0.726051	0.927206	1
Solyc02g069640	SL3.0ch02	40048981	40050981	-	1222	257	1172	309	82.623	79.136	-3.48768	0.0323043	0.075773	6.61082	0.774631	1
Solyc02g069660	SL3.0ch02	40075456	40077456	-	1571	330	1350	360	82.641	78.947	-3.69335	0.0119256	0.469138	2.36339	0.386449	1
Solyc02g069690	SL3.0ch02	40093167	40095167	-	1185	171	970	215	87.389	81.857	-5.53284	0.000505245	-0.541615	0.265662	0.468416	1
Solyc02g069740	SL3.0ch02	40114886	40116886	+	1162	789	834	744	59.559	52.852	-6.70749	0.000311015	-0.536766	-2.75961	0.809099	1
Solyc02g069800	SL3.0ch02	40194278	40196278	-	2148	409	1618	445	84.005	78.429	-5.57522	9.6388e-06	0.97023	8.07156	0.0227724	0.712619
Solyc02g069820	SL3.0ch02	40222571	40224571	-	960	278	770	294	77.544	72.368	-5.17601	0.0103289	0.483469	5.84952	0.0712654	1
Solyc02g069840	SL3.0ch02	40234295	40236295	+	906	340	465	561	72.713	45.322	-27.391	2.07859e-38	0.397019	4.66324	0.301476	1
Solyc02g069925	SL3.0ch02	40271484	40273484	+	165	431	63	321	27.685	16.406	-11.2783	0.000178027	-1.02037	1.3642	0.0869557	1
Solyc02g069950	SL3.0ch02	40295935	40297935	+	1578	848	802	1028	65.045	43.825	-21.2202	3.03633e-41	0.0550682	7.20474	0.823282	1
Solyc02g069960	SL3.0ch02	40308744	40310744	-	1497	370	1159	380	80.182	75.309	-4.87347	0.0020777	0	-3.76056	1	1
Solyc02g070180	SL3.0ch02	40533267	40535267	-	1625	1068	1248	956	60.342	56.624	-3.71731	0.0184709	2.25796	-0.567037	0.185663	1
Solyc02g070140	SL3.0ch02	40521578	40523578	+	1565	188	1265	194	89.276	86.703	-2.57231	0.0485265	0	-3.91086	1	1
Solyc02g070190	SL3.0ch02	40535963	40537963	-	702	32	653	52	95.64	92.624	-3.01621	0.0333449	0	-3.91086	1	1
Solyc02g070200	SL3.0ch02	40540853	40542853	-	525	428	374	434	55.089	46.287	-8.80206	0.000978896	4.0225	-3.40659	0.221382	1
Solyc02g070310	SL3.0ch02	40662617	40664617	-	604	1108	352	854	35.28	29.187	-6.09298	0.00184	0.0786002	9.35392	0.794033	1
Solyc02g070420	SL3.0ch02	40711836	40713836	-	312	215	250	245	59.203	50.505	-8.69799	0.0129136	0.0277281	-0.261442	0.981247	1
Solyc02g070450	SL3.0ch02	40754842	40756842	-	895	773	709	747	53.657	48.695	-4.96202	0.0130934	-0.544287	-0.0714167	0.590138	1
Solyc02g070460	SL3.0ch02	40764762	40766762	+	991	209	920	246	82.583	78.902	-3.6811	0.0435724	0.247732	6.41996	0.394911	1
Solyc02g070480	SL3.0ch02	40787291	40789291	+	862	737	698	815	53.909	46.134	-7.77518	8.34366e-05	0.150003	3.84979	0.706777	1
Solyc02g070483	SL3.0ch02	40788231	40790231	+	587	756	461	725	43.708	38.87	-4.83796	0.0292634	-0.011428	3.57696	0.976218	1
Solyc02g070510	SL3.0ch02	40803104	40805104	+	1192	668	988	763	64.086	56.425	-7.66112	1.59812e-05	-0.0319154	6.6353	0.911662	1
Solyc02g070520	SL3.0ch02	40818103	40820103	+	2218	444	1930	471	83.321	80.383	-2.93764	0.0151154	0.322136	4.85629	0.325883	1
Solyc02g070720	SL3.0ch02	40933868	40935868	+	66	84	50	129	44	27.933	-16.067	0.0068064	1.82764	-3.06169	1	1
Solyc02g070740	SL3.0ch02	40938699	40940699	+	791	237	717	273	76.946	72.424	-4.52128	0.0381545	1.78578	-3.79492	1	1
Solyc02g070760	SL3.0ch02	40949794	40951794	-	417	490	241	603	45.976	28.555	-17.4212	1.05903e-12	-0.908082	2.07981	0.0485476	0.997644
Solyc02g070880	SL3.0ch02	41046640	41048640	+	41	48	26	106	46.067	19.697	-26.3704	0.00020897	0.0667086	5.68727	0.806317	1
Solyc02g071030	SL3.0ch02	41091736	41093736	+	851	227	569	251	78.942	69.39	-9.55224	1.53971e-05	0	-3.91086	1	1
Solyc02g071050	SL3.0ch02	41109197	41111197	-	966	681	855	732	58.652	53.875	-4.77686	0.0142363	1.29054	4.07224	0.0266349	0.773904
Solyc02g071060	SL3.0ch02	41119078	41121078	-	939	599	791	737	61.053	51.767	-9.2863	1.74213e-06	-0.0607063	0.997371	0.946055	1
Solyc02g071080	SL3.0ch02	41142703	41144703	-	711	874	589	894	44.858	39.717	-5.14125	0.0103687	0.977229	6.64659	0.089207	1
Solyc02g071100	SL3.0ch02	41152758	41154758	-	966	719	758	760	57.329	49.934	-7.39525	0.000133482	-0.142655	3.20226	0.812223	1
Solyc02g071130	SL3.0ch02	41180342	41182342	-	285	813	176	757	25.956	18.864	-7.0924	0.000605569	3.12234	0.58249	0.0664308	1
Solyc02g071140	SL3.0ch02	41203961	41205961	-	1129	586	898	553	65.831	61.888	-3.94255	0.0414706	0.725655	2.53308	0.128994	1
Solyc02g071180	SL3.0ch02	41238804	41240804	-	1076	912	818	917	54.125	47.147	-6.97777	0.00010885	-0.0387462	6.23448	0.89115	1
Solyc02g071190	SL3.0ch02	41239320	41241320	+	1656	823	1353	812	66.801	62.494	-4.3069	0.00605344	0.120791	0.968619	0.877568	1
Solyc02g071200	SL3.0ch02	41242089	41244089	+	409	64	267	80	86.469	76.945	-9.5241	0.00179827	-0.165377	3.09236	0.72203	1
Solyc02g071310	SL3.0ch02	41356546	41358546	+	1471	56	1356	83	96.333	94.232	-2.10057	0.0155254	0.0695393	0.447008	0.920731	1
Solyc02g071320	SL3.0ch02	41365282	41367282	-	1109	789	945	779	58.43	54.814	-3.61554	0.0493847	0.283649	6.02069	0.312778	1
Solyc02g071370	SL3.0ch02	41411225	41413225	-	249	151	138	175	62.25	44.089	-18.1605	1.08659e-05	0	-3.91086	1	1
Solyc02g071365	SL3.0ch02	41456286	41458286	-	1138	336	967	347	77.205	73.592	-3.6128	0.0471947	0	-3.7647	1	1
Solyc02g071490	SL3.0ch02	41478605	41480605	-	98	15	83	28	86.726	74.775	-11.9509	0.0472194	0.592124	3.18802	0.229927	1
Solyc02g071530	SL3.0ch02	41489069	41491069	+	417	484	386	640	46.282	37.622	-8.66008	0.000484737	-0.294683	0.00502131	0.774857	1
Solyc02g071620	SL3.0ch02	41582587	41584587	+	1877	358	1944	451	83.982	81.169	-2.813	0.0238725	-0.399249	3.60595	0.579193	1
Solyc02g071910	SL3.0ch02	41846045	41848045	-	403	336	273	298	54.533	47.811	-6.72229	0.031454	0	-3.82954	1	1
Solyc02g071930	SL3.0ch02	41860700	41862700	+	1442	298	1394	409	82.874	77.316	-5.55798	0.000170308	0.461102	-2.1415	0.860254	1
Solyc02g072020	SL3.0ch02	41895047	41897047	+	13	52	0	41	20	0	-20	0.00416549	-0.170733	0.740168	0.796256	1
Solyc02g072040	SL3.0ch02	41900503	41902503	+	676	216	575	253	75.785	69.444	-6.34031	0.0084726	-0.791681	-1.15031	0.550854	1
Solyc02g072140	SL3.0ch02	41992790	41994790	+	157	742	105	699	17.464	13.06	-4.40415	0.0253619	-1.04548	-0.0637429	0.172818	1
Solyc02g072150	SL3.0ch02	42004874	42006874	-	801	533	615	539	60.045	53.293	-6.75208	0.00233145	-0.544248	6.42742	0.291663	1
Solyc02g072190	SL3.0ch02	42075795	42077795	-	166	712	106	702	18.907	13.119	-5.78779	0.00407118	1.79671	-0.512989	0.539979	1
Solyc02g072240	SL3.0ch02	42115171	42117171	+	103	53	49	55	66.026	47.115	-18.9103	0.00776523	-1.10204	-2.55128	0.579884	1
Solyc02g072270	SL3.0ch02	42135168	42137168	-	55	164	3	149	25.114	1.974	-23.1405	7.37154e-10	-0.321922	3.17283	0.408223	1
Solyc02g072300	SL3.0ch02	42152402	42154402	+	545	791	431	780	40.793	35.59	-5.20299	0.0156421	0.104318	6.26402	0.704413	1
Solyc02g072340	SL3.0ch02	42173195	42175195	-	329	244	275	268	57.417	50.645	-6.77254	0.0453942	0	-2.18759	1	1
Solyc02g073570	SL3.0ch02	42309473	42311473	+	16367	1061	6388	657	93.912	90.674	-3.23786	7.53164e-17	0	-3.69406	1	1
Solyc02g073571	SL3.0ch02	42319336	42321336	-	2659	237	1133	162	91.816	87.49	-4.32595	8.99302e-05	-4.66596	0.835815	2.3621e-10	2.16635e-07
Solyc02g074590	SL3.0ch02	42319336	42321336	-	2659	237	1133	162	91.816	87.49	-4.32595	8.99302e-05	0	-3.91086	1	1
Solyc02g073576	SL3.0ch02	42330159	42332159	-	964	168	667	214	85.159	75.709	-9.44959	9.75101e-07	0	-3.87249	1	1
Solyc02g074610	SL3.0ch02	42330497	42332497	+	1050	171	726	223	85.995	76.502	-9.49351	1.62579e-07	0	-3.91086	1	1
Solyc02g076650	SL3.0ch02	42365993	42367993	+	69	138	92	292	33.333	23.958	-9.375	0.0300336	0	-3.91086	1	1
Solyc02g076710	SL3.0ch02	42411647	42413647	-	39	175	2	131	18.224	1.504	-16.7205	2.12669e-06	0.944236	9.36955	0.0101057	0.480664
Solyc02g076720	SL3.0ch02	42418019	42420019	-	659	471	445	414	58.319	51.804	-6.51416	0.00988561	0.247133	5.96544	0.418658	1
Solyc02g076750	SL3.0ch02	42428238	42430238	-	529	889	345	820	37.306	29.614	-7.69233	0.000188739	-0.0233234	0.712215	0.992111	1
Solyc02g076810	SL3.0ch02	42487527	42489527	+	598	473	453	506	55.836	47.237	-8.59896	0.000440421	0.199824	5.32304	0.463057	1
Solyc02g076855	SL3.0ch02	42547633	42549633	-	491	451	317	531	52.123	37.382	-14.7411	5.43511e-09	0	-3.91086	1	1
Solyc02g076860	SL3.0ch02	42550568	42552568	-	145	688	76	600	17.407	11.243	-6.16436	0.00231616	0	-2.70117	1	1
Solyc02g077030	SL3.0ch02	42671786	42673786	+	328	182	71	172	64.314	29.218	-35.0956	5.66727e-18	-1.72854	-2.77402	0.243214	1
Solyc02g077070	SL3.0ch02	42696194	42698194	-	279	526	243	644	34.658	27.396	-7.26267	0.00374682	0.0435918	0.673172	0.960643	1
Solyc02g077110	SL3.0ch02	42735552	42737552	+	324	702	177	646	31.579	21.507	-10.0723	8.04318e-06	-0.211481	0.393473	0.814803	1
Solyc02g077140	SL3.0ch02	42752291	42754291	-	103	177	89	226	36.786	28.254	-8.53175	0.0482747	0	-3.91086	1	1
Solyc02g077240	SL3.0ch02	42805940	42807940	+	1618	514	1218	612	75.891	66.557	-9.3338	1.32202e-09	0.720788	8.19402	0.00793206	0.424087
Solyc02g077280	SL3.0ch02	42838487	42840487	-	731	521	529	538	58.387	49.578	-8.80832	0.000114778	-0.326204	4.70605	0.347497	1
Solyc02g077310	SL3.0ch02	42847359	42849359	+	132	304	103	467	30.275	18.07	-12.2051	4.5649e-05	0.552317	0.715705	0.332525	1
Solyc02g077360	SL3.0ch02	42883145	42885145	+	197	585	94	495	25.192	15.959	-9.23256	0.000156688	0	-3.68051	1	1
Solyc02g077420	SL3.0ch02	42929949	42931949	-	71	142	21	146	33.333	12.575	-20.7585	1.28841e-05	-0.92501	-3.76322	1	1
Solyc02g077510	SL3.0ch02	42976889	42978889	+	10	0	64	34	100	65.306	-34.6939	0.0491391	4.29463	-3.18263	0.189508	1
Solyc02g077520	SL3.0ch02	42983527	42985527	+	512	257	411	272	66.58	60.176	-6.40428	0.0241291	6.25926	0.479907	0.00498185	0.316502
Solyc02g077525	SL3.0ch02	42985975	42987975	+	247	55	192	89	81.788	68.327	-13.4607	0.000664293	0	-3.91086	1	1
Solyc02g077530	SL3.0ch02	42985975	42987975	+	247	55	192	89	81.788	68.327	-13.4607	0.000664293	-5.14125	-3.49609	0.0548999	1
Solyc02g077890	SL3.0ch02	43293217	43295217	-	674	382	567	407	63.826	58.214	-5.61221	0.021983	-0.0245428	3.33913	0.950418	1
Solyc02g077920	SL3.0ch02	43313396	43315396	-	445	382	278	399	53.809	41.064	-12.7454	6.96324e-06	-0.492219	8.34323	0.165853	1
Solyc02g077960	SL3.0ch02	43356920	43358920	-	146	410	129	500	26.259	20.509	-5.75025	0.0406216	0.221861	-1.66937	0.873736	1
Solyc02g078040	SL3.0ch02	43426490	43428490	-	98	519	41	456	15.883	8.249	-7.63381	0.00047366	-1.06992	3.67715	0.261232	1
Solyc02g078060	SL3.0ch02	43433313	43435313	-	774	568	577	546	57.675	51.38	-6.29488	0.00539994	0	-3.91086	1	1
Solyc02g078080	SL3.0ch02	43438808	43440808	-	477	332	404	373	58.962	51.995	-6.96683	0.0125363	0	-3.91086	1	1
Solyc02g078100	SL3.0ch02	43451944	43453944	-	665	326	367	254	67.104	59.098	-8.00571	0.00389604	7.23926	-2.60765	0.0215828	0.693925
Solyc02g078280	SL3.0ch02	43592275	43594275	-	290	52	266	100	84.795	72.678	-12.1177	0.000446237	0.193307	0.915476	0.726253	1
Solyc02g078400	SL3.0ch02	43667137	43669137	-	549	793	404	819	40.909	33.034	-7.87557	0.000191818	1.74713	8.94594	0.0104484	0.485901
Solyc02g078420	SL3.0ch02	43678629	43680629	-	73	484	22	365	13.106	5.685	-7.42117	0.000624164	0	-3.76338	1	1
Solyc02g078440	SL3.0ch02	43678724	43680724	+	74	515	24	413	12.564	5.492	-7.07168	0.000569829	-0.0151833	4.81276	0.95715	1
Solyc02g078540	SL3.0ch02	43774469	43776469	-	673	370	481	484	64.525	49.845	-14.6808	4.41493e-10	0.114433	7.53331	0.720744	1
Solyc02g078580	SL3.0ch02	43810587	43812587	+	553	863	517	962	39.054	34.956	-4.09762	0.0410777	0.34562	4.31206	0.238195	1
Solyc02g078660	SL3.0ch02	43894728	43896728	-	73	462	31	398	13.645	7.226	-6.41875	0.00452604	0.06885	2.30232	0.932396	1
Solyc02g078690	SL3.0ch02	43929001	43931001	-	394	336	385	477	53.973	44.664	-9.30903	0.000862168	-0.0200981	-1.47694	1	1
Solyc02g078720	SL3.0ch02	43952523	43954523	+	160	226	89	210	41.451	29.766	-11.6849	0.00487469	-0.19168	0.491471	0.77653	1
Solyc02g078830	SL3.0ch02	44050079	44052079	+	379	251	273	344	60.159	44.246	-15.9124	1.79247e-07	0.201174	5.66694	0.496542	1
Solyc02g078840	SL3.0ch02	44054822	44056822	+	463	633	243	694	42.245	25.934	-16.3107	2.30773e-13	0.6269	5.72809	0.0386277	0.911373
Solyc02g078880	SL3.0ch02	44081053	44083053	-	709	613	625	778	53.631	44.547	-9.08346	1.46061e-05	0.161889	5.14255	0.602741	1
Solyc02g078890	SL3.0ch02	44081891	44083891	+	445	1186	292	1185	27.284	19.77	-7.51407	6.25273e-06	-0.0915585	3.3233	0.925485	1
Solyc02g078960	SL3.0ch02	44123777	44125777	+	1475	521	1263	550	73.898	69.664	-4.23425	0.00944435	0.13085	4.82934	0.68189	1
Solyc02g079090	SL3.0ch02	44264915	44266915	+	273	77	137	150	78	47.735	-30.2648	6.10085e-14	0.1775	2.27308	0.730719	1
Solyc02g079130	SL3.0ch02	44298103	44300103	-	2640	436	2278	540	85.826	80.837	-4.98827	2.18346e-06	0.0148441	4.3046	0.967395	1
Solyc02g079160	SL3.0ch02	44325860	44327860	+	546	517	467	723	51.364	39.244	-12.1204	7.90798e-08	1.04543	-0.260614	0.315981	1
Solyc02g079200	SL3.0ch02	44369211	44371211	+	637	686	559	745	48.148	42.868	-5.28005	0.0152194	0	-3.91086	1	1
Solyc02g079250	SL3.0ch02	44407311	44409311	+	1797	632	1547	729	73.981	67.97	-6.01094	3.22541e-05	-0.318997	3.19844	0.350436	1
Solyc02g079260	SL3.0ch02	44426676	44428676	-	431	451	344	595	48.866	36.635	-12.2315	1.10668e-06	0.0616171	1.10222	0.912011	1
Solyc02g079270	SL3.0ch02	44424993	44426993	+	638	237	534	284	72.914	65.281	-7.63311	0.00230323	1.81997	-1.67395	0.125297	1
Solyc02g079273	SL3.0ch02	44426501	44428501	+	678	484	548	655	58.348	45.553	-12.7949	6.16346e-09	0.719416	0.174967	0.35059	1
Solyc02g079300	SL3.0ch02	44473014	44475014	-	516	548	344	504	48.496	40.566	-7.9302	0.00196096	-0.112546	4.0533	0.727459	1
Solyc02g079430	SL3.0ch02	44552714	44554714	-	1325	759	1023	686	63.58	59.86	-3.72009	0.0371576	-0.31976	1.14002	0.619218	1
Solyc02g079440	SL3.0ch02	44559562	44561562	-	293	507	175	552	36.625	24.072	-12.5535	9.74076e-07	1.78838	-2.62245	1	1
Solyc02g079470	SL3.0ch02	44572037	44574037	-	60	59	2	33	50.42	5.714	-44.7059	3.22452e-06	0	-3.91086	1	1
Solyc02g079480	SL3.0ch02	44574257	44576257	-	370	904	360	1076	29.042	25.07	-3.97275	0.0387149	1.79712	-3.83785	1	1
Solyc02g079580	SL3.0ch02	44652491	44654491	+	20	86	0	80	18.868	0	-18.8679	3.33881e-05	-0.698586	2.0717	0.304015	1
Solyc02g079600	SL3.0ch02	44676635	44678635	+	503	82	396	120	85.983	76.744	-9.23872	0.000373378	4.05094	-1.88141	0.0689204	1
Solyc02g079660	SL3.0ch02	44714631	44716631	-	532	60	423	93	89.865	81.977	-7.88812	0.000631016	0	-3.91086	1	1
Solyc02g079720	SL3.0ch02	44733382	44735382	+	412	122	291	184	77.154	61.263	-15.8904	4.56472e-07	1.3136	-0.535652	0.369546	1
Solyc02g079730	SL3.0ch02	44734117	44736117	+	512	252	361	275	67.016	56.761	-10.2547	0.000348384	-0.756812	3.42577	0.056097	1
Solyc02g079740	SL3.0ch02	44739284	44741284	+	419	567	355	654	42.495	35.183	-7.31158	0.00280452	0.302725	4.1422	0.378622	1
Solyc02g079940	SL3.0ch02	44880776	44882776	+	362	105	283	125	77.516	69.363	-8.15331	0.0155188	0.528062	-2.65321	0.79177	1
Solyc02g079980	SL3.0ch02	44904074	44906074	-	302	967	245	1007	23.798	19.569	-4.22958	0.0215473	0.69667	-0.280561	0.516577	1
Solyc02g080030	SL3.0ch02	44927152	44929152	-	195	335	80	246	36.792	24.54	-12.2526	0.000786208	0.942759	-1.55025	0.438519	1
Solyc02g080100	SL3.0ch02	44961840	44963840	-	2802	521	2301	518	84.321	81.625	-2.69671	0.0118621	-0.258798	-2.14608	0.921371	1
Solyc02g080110	SL3.0ch02	44967327	44969327	+	711	1027	511	961	40.909	34.715	-6.19442	0.00120297	0.508387	5.52406	0.160233	1
Solyc02g080200	SL3.0ch02	45044747	45046747	-	473	399	382	410	54.243	48.232	-6.0108	0.0306854	0	-3.91086	1	1
Solyc02g080240	SL3.0ch02	45063214	45065214	+	76	67	49	145	53.147	25.258	-27.8891	1.73961e-06	0	-3.91086	1	1
Solyc02g080280	SL3.0ch02	45104901	45106901	-	253	784	181	803	24.397	18.394	-6.00299	0.00332208	0.856023	-1.38421	0.388015	1
Solyc02g080320	SL3.0ch02	45127544	45129544	-	1536	426	1238	487	78.287	71.768	-6.51935	3.00104e-05	-0.0507031	3.42375	0.916103	1
Solyc02g080300	SL3.0ch02	45111798	45113798	+	16	100	3	74	13.793	3.896	-9.897	0.0459177	-0.287057	2.83265	0.583727	1
Solyc02g080330	SL3.0ch02	45131348	45133348	+	188	433	128	437	30.274	22.655	-7.61888	0.00778695	-1.93933	-3.87098	1	1
Solyc02g080340	SL3.0ch02	45143685	45145685	+	1031	81	888	102	92.716	89.697	-3.01886	0.0307737	0.253867	3.29941	0.559932	1
Solyc02g080370	SL3.0ch02	45159416	45161416	+	125	162	135	266	43.554	33.666	-9.88817	0.0183986	0.0828443	7.18888	0.768793	1
Solyc02g080400	SL3.0ch02	45181099	45183099	+	1476	157	1088	160	90.386	87.179	-3.20631	0.0151897	-2.16419	-1.63286	0.0317716	0.831314
Solyc02g080450	SL3.0ch02	45215436	45217436	+	581	839	355	767	40.915	31.64	-9.27556	9.78623e-06	-1.39239	-2.49866	0.347643	1
Solyc02g080480	SL3.0ch02	45244747	45246747	-	576	431	420	446	57.2	48.499	-8.70076	0.000645998	0.391987	1.99225	0.571749	1
Solyc02g080490	SL3.0ch02	45253784	45255784	-	573	546	497	606	51.206	45.059	-6.1475	0.00944756	-0.459873	3.80633	0.300561	1
Solyc02g080650	SL3.0ch02	45385474	45387474	+	41	174	9	186	19.07	4.615	-14.4544	3.8101e-05	-0.0101659	3.61372	0.981575	1
Solyc02g080680	SL3.0ch02	45410581	45412581	+	2024	118	1807	158	94.491	91.959	-2.53184	0.00404482	0	-3.91086	1	1
Solyc02g080755	SL3.0ch02	45449005	45451005	+	865	87	641	96	90.861	86.974	-3.88712	0.023383	0	-3.91086	1	1
Solyc02g080820	SL3.0ch02	45495523	45497523	+	23	112	3	119	17.037	2.459	-14.578	0.000421593	0.103653	4.95887	0.720138	1
Solyc02g080850	SL3.0ch02	45518232	45520232	+	198	911	114	813	17.854	12.298	-5.55619	0.00172966	0	-3.91086	1	1
Solyc02g080890	SL3.0ch02	45549047	45551047	-	426	1262	256	1271	25.237	16.765	-8.47207	4.18164e-08	0.331511	4.85464	0.61167	1
Solyc02g080910	SL3.0ch02	45570963	45572963	-	1977	417	1668	422	82.581	79.809	-2.77284	0.0353864	0	-3.91086	1	1
Solyc02g080960	SL3.0ch02	45589775	45591775	+	69	87	40	116	44.231	25.641	-18.5897	0.00257121	-0.221766	0.61578	0.689987	1
Solyc02g080970	SL3.0ch02	45599065	45601065	-	1295	200	1096	254	86.622	81.185	-5.43689	0.000388372	0.101913	4.81011	0.729711	1
Solyc02g081040	SL3.0ch02	45664512	45666512	-	12	0	0	11	100	0	-100	5.07786e-06	2.98177	-2.80765	0.115621	1
Solyc02g081070	SL3.0ch02	45694587	45696587	+	1212	970	1047	995	55.545	51.273	-4.27211	0.0125894	-0.405466	5.01441	0.356686	1
Solyc02g081130	SL3.0ch02	45752980	45754980	+	1153	695	750	606	62.392	55.31	-7.08204	0.000265826	-3.86773	-2.84054	0.177921	1
Solyc02g081180	SL3.0ch02	45793401	45795401	+	534	461	396	458	53.668	46.37	-7.29832	0.00488945	-3.61682	-3.75958	0.440506	1
Solyc02g081260	SL3.0ch02	45845920	45847920	+	191	8	120	14	95.98	89.552	-6.42766	0.0435972	-0.238047	0.593429	0.69618	1
Solyc02g081540	SL3.0ch02	46017601	46019601	-	251	428	170	455	36.966	27.2	-9.76613	0.000693055	4.15287	-2.12965	0.135495	1
Solyc02g081560	SL3.0ch02	46022853	46024853	-	40	122	0	125	24.691	0	-24.6914	2.16816e-10	0	-3.91086	1	1
Solyc02g081580	SL3.0ch02	46032395	46034395	-	945	313	748	385	75.119	66.019	-9.09982	7.38034e-06	0.460633	6.7169	0.0873445	1
Solyc02g081590	SL3.0ch02	46036292	46038292	+	730	175	661	206	80.663	76.24	-4.42308	0.0426131	0.0800706	6.62704	0.783001	1
Solyc02g081650	SL3.0ch02	46073974	46075974	+	106	516	47	427	17.042	9.916	-7.12619	0.00243726	-0.060863	4.381	0.846741	1
Solyc02g081660	SL3.0ch02	46082484	46084484	+	101	151	48	140	40.079	25.532	-14.5475	0.00441786	0.0723019	3.91893	0.846086	1
Solyc02g081700	SL3.0ch02	46110366	46112366	+	132	6	24	9	95.652	72.727	-22.9249	0.00102988	0.012364	7.61772	0.969542	1
Solyc02g081710	SL3.0ch02	46114280	46116280	-	1528	369	1163	348	80.548	76.969	-3.57934	0.0227465	-4.3122	-2.975	0.281474	1
Solyc02g081810	SL3.0ch02	46170474	46172474	+	1126	536	864	580	67.75	59.834	-7.9159	2.73646e-05	0.242301	6.32149	0.500102	1
Solyc02g081870	SL3.0ch02	46202079	46204079	+	2232	280	1986	350	88.854	85.017	-3.83638	0.00034169	0	-3.91086	1	1
Solyc02g081930	SL3.0ch02	46250832	46252832	-	1269	514	1046	533	71.172	66.244	-4.92772	0.005861	0.489615	1.17826	0.455341	1
Solyc02g081950	SL3.0ch02	46262877	46264877	+	363	180	229	188	66.851	54.916	-11.9348	0.000667445	0.0596763	4.42821	0.855073	1
Solyc02g082035	SL3.0ch02	46319453	46321453	-	734	177	622	232	80.571	72.834	-7.73708	0.000488085	0	-3.91086	1	1
Solyc02g082040	SL3.0ch02	46335344	46337344	+	389	997	274	886	28.066	23.621	-4.44569	0.0226958	-4.61559	-3.20875	0.200561	1
Solyc02g082150	SL3.0ch02	46422261	46424261	-	58	66	38	80	46.774	32.203	-14.5708	0.0443259	-1.22566	-0.735414	0.203968	1
Solyc02g082180	SL3.0ch02	46437267	46439267	+	842	540	818	658	60.926	55.42	-5.50614	0.00775508	0.294457	4.22372	0.535466	1
Solyc02g082230	SL3.0ch02	46485455	46487455	-	1370	534	1174	630	71.954	65.078	-6.87618	3.81174e-05	0.165648	4.85965	0.56926	1
Solyc02g082250	SL3.0ch02	46496834	46498834	+	398	845	174	682	32.019	20.327	-11.6922	2.90162e-08	0.171191	0.492702	0.794091	1
Solyc02g082300	SL3.0ch02	46563892	46565892	+	53	294	6	243	15.274	2.41	-12.8641	3.76662e-07	-0.0694396	1.39064	0.894101	1
Solyc02g082310	SL3.0ch02	46565997	46567997	+	167	261	73	186	39.019	28.185	-10.8334	0.00946643	0.358853	-0.0869015	0.655616	1
Solyc02g082320	SL3.0ch02	46583018	46585018	+	160	99	103	108	61.776	48.815	-12.9609	0.0119721	3.28643	-3.41907	0.455308	1
Solyc02g082330	SL3.0ch02	46584214	46586214	+	81	120	53	153	40.299	25.728	-14.5704	0.00578348	1.73319	-0.291374	0.0572232	1
Solyc02g082340	SL3.0ch02	46595643	46597643	-	2011	673	1727	708	74.925	70.924	-4.00146	0.00373465	0.135684	8.33179	0.655471	1
Solyc02g082390	SL3.0ch02	46627406	46629406	-	795	168	596	324	82.555	64.783	-17.7719	5.43892e-17	-4.58641	-3.32695	0.167167	1
Solyc02g082400	SL3.0ch02	46643614	46645614	+	1718	194	1627	292	89.854	84.784	-5.06981	1.46321e-05	0.072367	5.5123	0.789602	1
Solyc02g082410	SL3.0ch02	46654764	46656764	+	35	338	6	304	9.383	1.935	-7.44789	0.00014428	0.344035	-0.0419077	0.65434	1
Solyc02g082430	SL3.0ch02	46678842	46680842	-	992	1155	843	1127	46.204	42.792	-3.41213	0.0479998	0.243893	5.93979	0.454448	1
Solyc02g082460	SL3.0ch02	46726293	46728293	-	2151	535	1812	557	80.082	76.488	-3.59394	0.00549695	0.0147221	6.1637	0.955319	1
Solyc02g082470	SL3.0ch02	46727448	46729448	+	1432	460	1156	512	75.687	69.305	-6.38255	0.000100187	-0.0326555	6.13266	0.913401	1
Solyc02g082510	SL3.0ch02	46752077	46754077	+	580	405	421	406	58.883	50.907	-7.97636	0.00233946	0.247786	6.22789	0.494262	1
Solyc02g082540	SL3.0ch02	46769696	46771696	-	2996	359	2447	498	89.3	83.09	-6.20957	1.37095e-11	0.140143	6.60262	0.638528	1
Solyc02g082550	SL3.0ch02	46776440	46778440	+	854	190	514	207	81.801	71.29	-10.5109	2.2645e-06	-0.105958	5.50416	0.815722	1
Solyc02g082690	SL3.0ch02	46891147	46893147	+	790	156	457	343	83.51	57.125	-26.3845	3.52325e-32	0.553774	6.33639	0.248855	1
Solyc02g082763	SL3.0ch02	46974825	46976825	+	27	437	4	290	5.819	1.361	-4.45842	0.00572145	0.767825	0.670115	0.330669	1
Solyc02g082790	SL3.0ch02	46994447	46996447	-	557	216	367	266	72.057	57.978	-14.079	3.52114e-07	0	-3.91086	1	1
Solyc02g082800	SL3.0ch02	47008866	47010866	-	1442	856	1042	737	62.75	58.572	-4.17799	0.0158743	-0.0309632	7.02499	0.905744	1
Solyc02g082810	SL3.0ch02	47009387	47011387	+	1606	729	1104	588	68.779	65.248	-3.53122	0.034981	0.136641	3.63046	0.696502	1
Solyc02g082830	SL3.0ch02	47032568	47034568	+	501	648	312	604	43.603	34.061	-9.542	5.73352e-05	0.057646	5.14558	0.862459	1
Solyc02g082860	SL3.0ch02	47064991	47066991	+	982	281	1021	393	77.751	72.207	-5.54488	0.00289349	0.115746	4.02038	0.725382	1
Solyc02g082940	SL3.0ch02	47111462	47113462	+	1151	556	877	613	67.428	58.859	-8.56918	3.88037e-06	-0.709577	-1.18205	0.428429	1
Solyc02g082990	SL3.0ch02	47135209	47137209	+	726	324	544	310	69.143	63.7	-5.44262	0.0252225	-1.93232	-3.79464	1	1
Solyc02g083000	SL3.0ch02	47139946	47141946	+	41	483	16	431	7.824	3.579	-4.24501	0.0131997	-1.58613	-2.56339	0.300942	1
Solyc02g083090	SL3.0ch02	47177134	47179134	+	52	166	2	49	23.853	3.922	-19.9316	0.00229118	-3.83573	-2.61223	0.0833921	1
Solyc02g083180	SL3.0ch02	47233513	47235513	-	1387	860	1095	817	61.727	57.27	-4.45687	0.00869461	-0.215394	-0.665135	0.784135	1
Solyc02g083170	SL3.0ch02	47227368	47229368	+	1447	311	1311	362	82.309	78.362	-3.94722	0.00954454	-1.0797	-0.173176	0.12045	1
Solyc02g083260	SL3.0ch02	47271756	47273756	-	126	60	87	117	67.742	42.647	-25.0949	6.05743e-06	-0.0187988	4.67544	0.947194	1
Solyc02g083350	SL3.0ch02	47353485	47355485	-	3549	363	3483	447	90.721	88.626	-2.0949	0.0061507	0.240408	6.67139	0.436588	1
Solyc02g083360	SL3.0ch02	47356717	47358717	+	1062	870	863	856	54.969	50.204	-4.76534	0.0102613	0.178018	4.67865	0.630738	1
Solyc02g083410	SL3.0ch02	47380572	47382572	+	301	208	181	236	59.136	43.405	-15.7303	1.20723e-05	-0.103787	3.81074	0.794287	1
Solyc02g083440	SL3.0ch02	47401009	47403009	+	149	228	115	260	39.523	30.667	-8.85588	0.0236926	-3.91762	-3.68723	0.227759	1
Solyc02g083640	SL3.0ch02	47528426	47530426	-	90	307	41	370	22.67	9.976	-12.6944	6.24242e-06	-1.61848	-3.03807	0.426513	1
Solyc02g083650	SL3.0ch02	47533169	47535169	-	1136	328	811	353	77.596	69.674	-7.92209	2.72786e-05	0.184038	5.71589	0.536512	1
Solyc02g083900	SL3.0ch02	47720903	47722903	-	1264	581	979	669	68.509	59.405	-9.10415	2.09332e-07	0.272174	6.25624	0.405914	1
Solyc02g083930	SL3.0ch02	47728610	47730610	+	855	996	707	1040	46.191	40.469	-5.72187	0.00191102	0.44273	3.82898	0.30279	1
Solyc02g083990	SL3.0ch02	47770356	47772356	+	1503	270	1613	354	84.772	82.003	-2.76852	0.0438392	-0.230291	4.59467	0.450617	1
Solyc02g084037	SL3.0ch02	47815863	47817863	-	404	30	539	144	93.088	78.917	-14.171	5.35281e-10	4.75541	-0.286793	3.45079e-05	0.00863257
Solyc02g084160	SL3.0ch02	47903907	47905907	-	244	15	139	39	94.208	78.09	-16.1186	6.9461e-06	2.21694	0.182331	0.00632541	0.366096
Solyc02g084167	SL3.0ch02	47923766	47925766	-	336	27	328	68	92.562	82.828	-9.7337	0.000199075	1.14288	0.707905	0.243428	1
Solyc02g084190	SL3.0ch02	47926541	47928541	-	774	379	820	656	67.129	55.556	-11.5737	1.77472e-08	2.7504	-1.59189	0.155612	1
Solyc02g084220	SL3.0ch02	47944563	47946563	-	68	32	30	49	68	37.975	-30.0253	0.000329776	0.871458	3.15771	0.0334285	0.857035
Solyc02g084330	SL3.0ch02	48003922	48005922	+	186	17	198	38	91.626	83.898	-7.72731	0.03666	1.33454	2.28197	0.0287824	0.794866
Solyc02g084410	SL3.0ch02	48078132	48080132	+	443	91	458	160	82.959	74.11	-8.84877	0.00116128	2.04246	0.985059	0.0298251	0.807559
Solyc02g084440	SL3.0ch02	48090998	48092998	-	720	147	571	157	83.045	78.434	-4.61092	0.038295	0.469923	9.78173	0.317721	1
Solyc02g084455	SL3.0ch02	48101557	48103557	-	1549	385	686	244	80.093	73.763	-6.32963	0.000636532	-2.4385	-3.26652	0.450516	1
Solyc02g084470	SL3.0ch02	48101813	48103813	+	1858	392	877	236	82.578	78.796	-3.78173	0.0181239	0	-3.91086	1	1
Solyc02g084560	SL3.0ch02	48276382	48278382	+	74	181	43	267	29.02	13.871	-15.1486	5.74744e-05	-0.281197	2.84886	0.482247	1
Solyc02g084680	SL3.0ch02	48413576	48415576	+	708	671	596	855	51.342	41.075	-10.2664	3.88419e-07	0.52551	-0.744216	0.610216	1
Solyc02g084720	SL3.0ch02	48462070	48464070	-	271	756	247	996	26.388	19.871	-6.51626	0.000879684	-1.08698	5.83633	0.0144705	0.582053
Solyc02g084750	SL3.0ch02	48493200	48495200	-	1826	263	1922	401	87.41	82.738	-4.67241	8.28762e-05	-0.224113	4.1366	0.466533	1
Solyc02g084760	SL3.0ch02	48497044	48499044	+	1053	725	818	831	59.224	49.606	-9.61803	1.65266e-07	0.454959	5.78615	0.114319	1
Solyc02g084890	SL3.0ch02	48590733	48592733	-	172	117	279	677	59.516	29.184	-30.3315	1.00245e-18	4.16529	6.12622	1.3483e-10	1.30341e-07
Solyc02g085070	SL3.0ch02	48718759	48720759	+	152	131	80	152	53.71	34.483	-19.2275	6.71872e-05	3.01099	-3.80407	0.520586	1
Solyc02g085080	SL3.0ch02	48721611	48723611	+	10	47	0	31	17.544	0	-17.5439	0.0251322	-0.817996	3.92759	0.0346118	0.869378
Solyc02g085100	SL3.0ch02	48733232	48735232	-	11	72	0	51	13.253	0	-13.253	0.0149406	-0.664626	4.25811	0.0909367	1
Solyc02g085120	SL3.0ch02	48741413	48743413	-	186	614	47	622	23.25	7.025	-16.2246	9.62106e-17	0.762808	-2.21454	0.636348	1
Solyc02g085130	SL3.0ch02	48746258	48748258	+	595	524	770	811	53.172	48.703	-4.46912	0.0415785	-0.138812	1.8162	0.804444	1
Solyc02g085180	SL3.0ch02	48798997	48800997	-	370	581	332	737	38.906	31.057	-7.84935	0.000927063	-0.166331	3.57353	0.668687	1
Solyc02g085210	SL3.0ch02	48816157	48818157	+	88	60	110	334	59.459	24.775	-34.6847	1.06188e-12	0	-3.91086	1	1
Solyc02g085230	SL3.0ch02	48844442	48846442	-	557	342	592	489	61.958	54.764	-7.19362	0.00388924	-0.100241	3.84393	0.826473	1
Solyc02g085240	SL3.0ch02	48843359	48845359	+	554	133	584	283	80.64	67.359	-13.2818	3.79265e-08	-0.199272	2.16466	0.638192	1
Solyc02g085290	SL3.0ch02	48874960	48876960	-	51	317	25	289	13.859	7.962	-5.89691	0.0287088	1.88102	2.33383	0.0021428	0.182877
Solyc02g085285	SL3.0ch02	48880274	48882274	-	13	87	0	55	13	0	-13	0.0104231	-0.471435	5.12947	0.115531	1
Solyc02g085370	SL3.0ch02	48943223	48945223	-	1809	297	1776	382	85.897	82.298	-3.59901	0.00411106	0.00613842	2.70935	0.994082	1
Solyc02g085380	SL3.0ch02	48942742	48944742	+	1802	367	1772	442	83.08	80.036	-3.04363	0.0210596	0.535938	1.21461	0.531876	1
Solyc02g085390	SL3.0ch02	48955689	48957689	-	488	326	444	432	59.951	50.685	-9.26593	0.000528793	0.120804	1.68935	0.868323	1
Solyc02g085480	SL3.0ch02	48987069	48989069	+	481	132	363	173	78.467	67.724	-10.7427	0.00019407	-0.728219	2.21753	0.171954	1
Solyc02g085495	SL3.0ch02	49002696	49004696	-	118	503	147	900	19.002	14.04	-4.9615	0.0180012	-1.91936	-3.66328	1	1
Solyc02g085500	SL3.0ch02	49002774	49004774	+	107	490	119	791	17.923	13.077	-4.84602	0.0241672	-0.241826	3.58707	0.607135	1
Solyc02g085670	SL3.0ch02	49132306	49134306	+	1461	249	1309	337	85.439	79.526	-5.91247	3.65922e-05	-0.079014	3.14393	0.845563	1
Solyc02g085678	SL3.0ch02	49142151	49144151	-	443	29	371	45	93.856	89.183	-4.67324	0.0282746	-0.313504	0.394833	0.625182	1
Solyc02g085720	SL3.0ch02	49162484	49164484	+	80	59	1	19	57.554	5	-52.554	2.78203e-05	-0.255681	0.0479129	0.726176	1
Solyc02g085920	SL3.0ch02	49335846	49337846	-	52	741	19	601	6.557	3.065	-3.49286	0.00762836	0.123873	5.72741	0.69718	1
Solyc02g085930	SL3.0ch02	49334914	49336914	+	47	608	25	594	7.176	4.039	-3.1368	0.037313	-0.431614	-0.972944	0.668404	1
Solyc02g085950	SL3.0ch02	49350760	49352760	+	31	817	10	708	3.656	1.393	-2.2629	0.0141486	-2.48115	1.9322	0.00295267	0.228102
Solyc02g085940	SL3.0ch02	49353695	49355695	-	13	73	2	178	15.116	1.111	-14.0052	6.41161e-05	0	-3.91086	1	1
Solyc02g086010	SL3.0ch02	49440087	49442087	+	1716	704	1576	820	70.909	65.776	-5.1328	0.000538175	-0.123222	-1.70731	0.957329	1
Solyc02g086060	SL3.0ch02	49491116	49493116	-	2551	106	2069	130	96.011	94.088	-1.92232	0.00544164	0.195289	3.44531	0.611472	1
Solyc02g086090	SL3.0ch02	49504355	49506355	-	186	5	87	16	97.382	84.466	-12.9162	0.000335768	0	-3.91086	1	1
Solyc02g086110	SL3.0ch02	49527772	49529772	-	1333	287	1188	337	82.284	77.902	-4.38231	0.00613938	-0.33869	2.20687	0.473754	1
Solyc02g086140	SL3.0ch02	49540157	49542157	-	185	127	107	143	59.295	42.8	-16.4949	0.000505434	0.164001	-0.679072	0.868932	1
Solyc02g086145	SL3.0ch02	49538532	49540532	+	92	94	50	145	49.462	25.641	-23.8213	1.07415e-05	-0.0105305	5.51625	0.972935	1
Solyc02g086240	SL3.0ch02	49596959	49598959	+	1698	149	1525	252	91.933	85.819	-6.11407	4.9079e-08	0.126715	7.35097	0.669865	1
Solyc02g086360	SL3.0ch02	49663563	49665563	-	783	994	611	969	44.063	38.671	-5.39214	0.00444596	0.192691	2.0087	0.734416	1
Solyc02g086430	SL3.0ch02	49731450	49733450	+	245	576	183	640	29.842	22.236	-7.60593	0.00160184	-2.55024	-3.83813	0.668789	1
Solyc02g086445	SL3.0ch02	49745021	49747021	+	111	7	41	12	94.068	77.358	-16.7093	0.00705821	0	-3.91086	1	1
Solyc02g086460	SL3.0ch02	49759703	49761703	+	152	441	105	441	25.632	19.231	-6.40161	0.021864	-0.371253	6.55821	0.29966	1
Solyc02g086500	SL3.0ch02	49803663	49805663	+	1804	357	1631	397	83.48	80.424	-3.05581	0.0228194	-0.124205	5.33467	0.674456	1
Solyc02g086540	SL3.0ch02	49857611	49859611	-	524	753	406	750	41.034	35.121	-5.91257	0.00759555	-0.116686	-3.72346	1	1
Solyc02g086550	SL3.0ch02	49857611	49859611	-	524	753	406	750	41.034	35.121	-5.91257	0.00759555	-0.537147	0.872828	0.391136	1
Solyc02g086630	SL3.0ch02	49931205	49933205	-	1458	895	1290	979	61.963	56.853	-5.11021	0.00137333	-0.906229	-0.289437	0.294598	1
Solyc02g086640	SL3.0ch02	49930793	49932793	+	1531	1256	1366	1278	54.934	51.664	-3.26948	0.0315591	1.13146	-0.810741	0.173444	1
Solyc02g086750	SL3.0ch02	50001734	50003734	+	73	291	29	292	20.055	9.034	-11.0207	0.000256984	0.126022	5.79802	0.694778	1
Solyc02g086800	SL3.0ch02	50049991	50051991	+	813	803	652	776	50.309	45.658	-4.65114	0.022401	0.2738	4.09283	0.391912	1
Solyc02g086880	SL3.0ch02	50120390	50122390	+	704	892	551	932	44.11	37.154	-6.95586	0.00040455	-0.281879	8.99482	0.428055	1
Solyc02g086920	SL3.0ch02	50151962	50153962	-	1062	652	886	679	61.96	56.613	-5.34691	0.00527177	0.417922	-2.76624	0.915905	1
Solyc02g087020	SL3.0ch02	50209412	50211412	-	2689	236	2324	294	91.932	88.77	-3.16157	0.000288062	0	-3.91086	1	1
Solyc02g087070	SL3.0ch02	50234631	50236631	+	1713	625	1543	682	73.268	69.348	-3.91944	0.00872935	0	-0.875454	1	1
Solyc02g087140	SL3.0ch02	50271834	50273834	+	78	48	50	85	61.905	37.037	-24.8677	0.000299999	0.0108932	2.77356	0.980705	1
Solyc02g087180	SL3.0ch02	50294131	50296131	+	69	417	4	383	14.198	1.034	-13.1639	5.79748e-13	0.15091	3.35873	0.691676	1
Solyc02g087215	SL3.0ch02	50313096	50315096	-	200	4	122	11	98.039	91.729	-6.30989	0.0243105	0	-3.91086	1	1
Solyc02g087290	SL3.0ch02	50381432	50383432	-	1505	330	1328	397	82.016	76.986	-5.03084	0.000777327	-0.204743	5.01069	0.518445	1
Solyc02g087320	SL3.0ch02	50398103	50400103	-	133	6	101	38	95.683	72.662	-23.0216	9.02569e-07	-0.874828	-1.29826	0.362428	1
Solyc02g087360	SL3.0ch02	50430475	50432475	-	2770	320	2447	360	89.644	87.175	-2.46909	0.00815261	0.344397	5.15914	0.367718	1
Solyc02g087410	SL3.0ch02	50497951	50499951	-	292	564	260	683	34.112	27.572	-6.54057	0.0075358	-0.368564	0.367508	0.609383	1
Solyc02g087450	SL3.0ch02	50530862	50532862	-	1419	737	1111	754	65.816	59.571	-6.24528	0.000216883	0.054141	2.09911	0.934718	1
Solyc02g087480	SL3.0ch02	50549900	50551900	+	487	910	368	942	34.86	28.092	-6.76881	0.000632126	-0.215554	6.4524	0.58535	1
Solyc02g087600	SL3.0ch02	50611574	50613574	+	47	143	11	192	24.737	5.419	-19.3181	4.71176e-07	0.27692	2.25019	0.613735	1
Solyc02g087650	SL3.0ch02	50652182	50654182	+	335	118	308	170	73.951	64.435	-9.51629	0.00492898	0	-3.91086	1	1
Solyc02g087720	SL3.0ch02	50676901	50678901	-	2198	327	1879	375	87.05	83.363	-3.68659	0.00125118	0.0350522	5.10757	0.904468	1
Solyc02g087730	SL3.0ch02	50676864	50678864	+	2203	405	1881	451	84.471	80.66	-3.81048	0.00152147	0.274414	4.95785	0.320753	1
Solyc02g087750	SL3.0ch02	50692294	50694294	+	802	693	561	603	53.645	48.196	-5.44961	0.0126279	0.764915	7.38002	0.0099437	0.476765
Solyc02g087850	SL3.0ch02	50750677	50752677	+	439	660	254	497	39.945	33.822	-6.12383	0.0176956	-0.0582308	5.9424	0.892127	1
Solyc02g087870	SL3.0ch02	50782613	50784613	-	406	435	290	399	48.276	42.09	-6.18588	0.0330248	-0.272222	4.57462	0.514362	1
Solyc02g087935	SL3.0ch02	50816056	50818056	-	555	271	491	313	67.191	61.07	-6.12163	0.0230068	0	-3.91086	1	1
Solyc02g087950	SL3.0ch02	50824919	50826919	-	216	271	217	373	44.353	36.78	-7.57352	0.0250034	-0.815541	4.92158	0.165192	1
Solyc02g087940	SL3.0ch02	50814610	50816610	+	1399	901	1329	981	60.826	57.532	-3.29362	0.0432135	0	-3.91086	1	1
Solyc02g088010	SL3.0ch02	50881791	50883791	-	552	277	428	332	66.586	56.316	-10.2705	0.000134404	0.0526394	4.62827	0.84993	1
Solyc02g088060	SL3.0ch02	50901654	50903654	-	94	481	45	418	16.348	9.719	-6.6286	0.00493188	1.90017	-3.32799	1	1
Solyc02g088080	SL3.0ch02	50910877	50912877	+	1693	693	1642	848	70.956	65.944	-5.0118	0.000647877	-5.4815	-3.08086	0.135628	1
Solyc02g088090	SL3.0ch02	50914676	50916676	+	72	383	32	366	15.824	8.04	-7.78397	0.00167759	0.43042	6.51681	0.382186	1
Solyc02g088167	SL3.0ch02	50959768	50961768	+	406	264	261	245	60.597	51.581	-9.01599	0.00632951	-0.661174	-0.523397	0.322471	1
Solyc02g088180	SL3.0ch02	50971104	50973104	+	535	1044	449	1042	33.882	30.114	-3.76819	0.047105	-0.287078	-0.707243	0.805189	1
Solyc02g088420	SL3.0ch02	51134644	51136644	+	1528	545	1487	629	73.71	70.274	-3.4355	0.028208	1.75135	-3.30198	0.649666	1
Solyc02g088500	SL3.0ch02	51212282	51214282	-	859	896	585	937	48.946	38.436	-10.5096	1.79174e-08	0	-3.91086	1	1
Solyc02g088620	SL3.0ch02	51292469	51294469	-	556	271	424	343	67.231	55.28	-11.9506	6.57922e-06	0.532124	6.29658	0.0720831	1
Solyc02g088670	SL3.0ch02	51315556	51317556	-	38	90	17	187	29.688	8.333	-21.3542	4.49074e-06	-1.97161	-2.87142	0.415337	1
Solyc02g088680	SL3.0ch02	51315408	51317408	+	38	90	17	187	29.688	8.333	-21.3542	4.49074e-06	0	-3.91086	1	1
Solyc02g088740	SL3.0ch02	51359136	51361136	+	972	355	835	483	73.248	63.354	-9.89436	4.56534e-07	0.312352	2.34052	0.592516	1
Solyc02g088780	SL3.0ch02	51388690	51390690	-	1250	299	1050	355	80.697	74.733	-5.96413	0.000448012	0.188031	6.51543	0.468127	1
Solyc02g088830	SL3.0ch02	51425479	51427479	+	1237	693	942	616	64.093	60.462	-3.63113	0.0495028	-0.0224826	-1.14297	1	1
Solyc02g088952	SL3.0ch02	51508753	51510753	+	91	20	68	37	81.982	64.762	-17.2201	0.0121846	0	-3.91086	1	1
Solyc02g088956	SL3.0ch02	51517054	51519054	+	186	8	192	25	95.876	88.479	-7.39703	0.0139007	0.874139	-0.0857674	0.294172	1
Solyc02g089075	SL3.0ch02	51620463	51622463	+	225	959	143	791	19.003	15.31	-3.69289	0.0480772	-1.49073	-1.6219	0.107753	1
Solyc02g089100	SL3.0ch02	51631465	51633465	+	660	1522	450	1266	30.247	26.224	-4.0237	0.0134147	0.291082	5.64099	0.348094	1
Solyc02g089120	SL3.0ch02	51645468	51647468	+	19	56	1	48	25.333	2.041	-23.2925	0.00112592	0.208433	4.4619	0.588148	1
Solyc02g089130	SL3.0ch02	51651059	51653059	-	304	245	232	369	55.373	38.602	-16.7711	1.24566e-07	0.142629	2.23909	0.778111	1
Solyc02g089150	SL3.0ch02	51656942	51658942	+	360	295	289	314	54.962	47.927	-7.0348	0.0257874	2.17987	4.1823	3.68766e-06	0.00130594
Solyc02g089160	SL3.0ch02	51679488	51681488	+	108	366	69	424	22.785	13.996	-8.78887	0.0015298	-0.175762	6.24841	0.733913	1
Solyc02g089175	SL3.0ch02	51698496	51700496	-	1232	1050	903	1261	53.988	41.728	-12.2594	7.41599e-15	0.20259	5.70085	0.483545	1
Solyc02g089190	SL3.0ch02	51702661	51704661	+	1022	473	1015	567	68.361	64.159	-4.20191	0.0283926	1.95273	-3.64424	1	1
Solyc02g089220	SL3.0ch02	51736306	51738306	-	723	618	713	724	53.915	49.617	-4.29773	0.0437567	-0.231351	3.71047	0.520956	1
Solyc02g089230	SL3.0ch02	51735538	51737538	+	721	537	718	717	57.313	50.035	-7.27835	0.000653054	0.0665717	5.29735	0.827175	1
Solyc02g089270	SL3.0ch02	51788987	51790987	-	589	964	430	890	37.927	32.576	-5.35084	0.00745676	0	-3.91086	1	1
Solyc02g089300	SL3.0ch02	51802589	51804589	-	1982	484	1723	521	80.373	76.783	-3.59054	0.00710375	0	-3.91086	1	1
Solyc02g089310	SL3.0ch02	51809888	51811888	-	991	423	849	510	70.085	62.472	-7.61246	0.000115915	-0.0259282	3.81932	0.945979	1
Solyc02g089330	SL3.0ch02	51820030	51822030	+	14	57	1	120	19.718	0.826	-18.8919	2.26654e-05	0.527415	0.989391	0.459531	1
Solyc02g089340	SL3.0ch02	51822230	51824230	+	31	125	0	43	19.872	0	-19.8718	0.00168284	-0.0139082	3.7662	0.971266	1
Solyc02g089360	SL3.0ch02	51845635	51847635	-	1255	306	1022	331	80.397	75.536	-4.86134	0.00458607	0.2852	5.74734	0.347561	1
Solyc02g089480	SL3.0ch02	51932612	51934612	-	345	710	292	757	32.701	27.836	-4.86539	0.0298326	0.975317	0.982767	0.153842	1
Solyc02g089490	SL3.0ch02	51938156	51940156	+	1748	655	1425	725	72.742	66.279	-6.46334	1.46263e-05	0.552676	3.59163	0.275154	1
Solyc02g089495	SL3.0ch02	51943459	51945459	+	284	6	72	14	97.931	83.721	-14.2101	2.87909e-05	-0.676995	1.28027	0.39703	1
Solyc02g089700	SL3.0ch02	52079199	52081199	+	136	480	83	416	22.078	16.633	-5.44466	0.0411469	-4.50795	-3.45142	0.177527	1
Solyc02g089800	SL3.0ch02	52141765	52143765	-	157	516	102	526	23.328	16.242	-7.08634	0.00396703	0.0251273	5.5872	0.93452	1
Solyc02g089810	SL3.0ch02	52148225	52150225	-	10	1	3	70	90.909	4.11	-86.7995	1.28712e-08	0.212441	4.69539	0.443004	1
Solyc02g089860	SL3.0ch02	52200211	52202211	-	173	559	128	619	23.634	17.135	-6.49867	0.00524509	-0.915989	-0.677355	0.459306	1
Solyc02g089870	SL3.0ch02	52200144	52202144	+	173	632	129	659	21.491	16.371	-5.12012	0.0216298	0.154019	4.90539	0.610205	1
Solyc02g089950	SL3.0ch02	52278285	52280285	-	23	302	8	309	7.077	2.524	-4.55326	0.0191739	-0.294142	0.196036	0.677078	1
Solyc02g090020	SL3.0ch02	52329637	52331637	+	1699	125	1670	162	93.147	91.157	-1.98972	0.0463313	-0.311874	3.55053	0.481898	1
Solyc02g090090	SL3.0ch02	52363921	52365921	-	2086	387	1693	392	84.351	81.199	-3.15195	0.0117507	-0.0296985	5.78225	0.910791	1
Solyc02g090370	SL3.0ch02	52562822	52564822	+	1862	919	1410	1040	66.954	57.551	-9.40331	4.55939e-11	-0.770029	-0.689268	0.517483	1
Solyc02g090450	SL3.0ch02	52633416	52635416	+	314	505	235	580	38.339	28.834	-9.50508	0.000237087	-0.367051	0.881592	0.599228	1
Solyc02g090510	SL3.0ch02	52686146	52688146	+	1374	773	1109	876	63.996	55.869	-8.12726	8.83761e-07	-0.603344	0.684526	0.421488	1
Solyc02g090570	SL3.0ch02	52738534	52740534	+	1495	821	1438	968	64.551	59.767	-4.7837	0.0023934	-0.203608	6.37063	0.486409	1
Solyc02g090650	SL3.0ch02	52833159	52835159	-	123	111	68	183	52.564	27.092	-25.4725	1.12767e-07	0.390537	4.97291	0.210203	1
Solyc02g090660	SL3.0ch02	52836604	52838604	-	118	76	52	77	60.825	40.31	-20.5147	0.00136142	-1.91218	-3.72381	1	1
Solyc02g090750	SL3.0ch02	52902288	52904288	-	529	255	365	319	67.474	53.363	-14.1119	3.7443e-07	0.30147	0.993827	0.640553	1
Solyc02g090830	SL3.0ch02	52946971	52948971	+	301	757	199	764	28.45	20.665	-7.78532	0.000242695	-0.0288202	-3.48879	1	1
Solyc02g090890	SL3.0ch02	53012686	53014686	-	264	695	184	639	27.529	22.357	-5.17145	0.0267469	-0.664362	5.29919	0.127275	1
Solyc02g090950	SL3.0ch02	53049093	53051093	+	240	626	132	492	27.714	21.154	-6.55978	0.0103262	-1.93928	-3.87098	1	1
Solyc02g091000	SL3.0ch02	53086975	53088975	-	423	555	355	585	43.252	37.766	-5.48558	0.0298381	0.481644	4.62058	0.249345	1
Solyc02g091020	SL3.0ch02	53093915	53095915	-	128	185	42	156	40.895	21.212	-19.6824	2.06197e-05	-0.12023	1.6081	0.876648	1
Solyc02g091060	SL3.0ch02	53125752	53127752	-	469	415	412	478	53.054	46.292	-6.76216	0.0117936	0.45521	-1.35826	0.678948	1
Solyc08g079210	SL3.0ch02	53126484	53128484	-	460	453	400	555	50.383	41.885	-8.49853	0.000879684	1.81257	-3.69003	1	1
Solyc02g091070	SL3.0ch02	53131548	53133548	-	575	137	458	157	80.758	74.472	-6.28688	0.0146411	1.78833	-3.00461	1	1
Solyc02g091130	SL3.0ch02	53179780	53181780	+	462	955	405	1070	32.604	27.458	-5.14647	0.00685221	-0.0107554	2.7007	0.984618	1
Solyc02g091230	SL3.0ch02	53235039	53237039	-	161	69	147	172	70	46.082	-23.9185	2.06674e-07	0.0815063	2.24903	0.881939	1
Solyc02g091290	SL3.0ch02	53262359	53264359	+	180	550	39	509	24.658	7.117	-17.5407	3.29814e-16	-0.805175	2.66472	0.0696412	1
Solyc02g091340	SL3.0ch02	53308053	53310053	-	268	7	179	19	97.455	90.404	-7.05051	0.00447948	-0.330948	4.28509	0.287245	1
Solyc02g091470	SL3.0ch02	53396653	53398653	+	1228	362	1005	383	77.233	72.406	-4.82636	0.00670968	-1.08975	0.191485	0.184381	1
Solyc02g091500	SL3.0ch02	53415351	53417351	+	1609	794	1291	839	66.958	60.61	-6.34764	4.99088e-05	-0.0434997	6.44615	0.923046	1
Solyc02g091510	SL3.0ch02	53425653	53427653	-	559	195	518	235	74.138	68.792	-5.34643	0.0402621	0.313183	6.64931	0.289966	1
Solyc02g091520	SL3.0ch02	53429331	53431331	-	1000	926	888	1096	51.921	44.758	-7.16302	4.08726e-05	0.229975	5.08432	0.491209	1
Solyc02g091570	SL3.0ch02	53469537	53471537	-	167	242	79	245	40.831	24.383	-16.4486	1.86838e-05	0.714539	-3.3734	1	1
Solyc02g091620	SL3.0ch02	53498270	53500270	+	590	592	576	759	49.915	43.146	-6.76933	0.00236462	-0.549432	1.67441	0.249062	1
Solyc02g091623	SL3.0ch02	53498389	53500389	+	477	583	432	946	45	31.35	-13.6502	8.71123e-11	2.62767	-3.61211	0.597833	1
Solyc02g091650	SL3.0ch02	53528955	53530955	+	118	312	89	377	27.442	19.099	-8.34315	0.00826392	1.43806	2.91256	0.0788306	1
Solyc02g091680	SL3.0ch02	53556463	53558463	-	382	622	333	667	38.048	33.3	-4.74781	0.0484707	-0.403501	5.36997	0.184846	1
Solyc02g091700	SL3.0ch02	53576603	53578603	-	89	646	35	509	12.109	6.434	-5.67502	0.00236813	0.612641	6.43651	0.118595	1
Solyc02g091760	SL3.0ch02	53616686	53618686	+	112	80	89	130	58.333	40.639	-17.6941	0.00127744	0	-3.91086	1	1
Solyc02g091770	SL3.0ch02	53617349	53619349	+	160	38	71	64	80.808	52.593	-28.2155	5.79156e-07	-0.318802	-0.104118	0.674441	1
Solyc02g091790	SL3.0ch02	53642172	53644172	+	86	265	23	205	24.501	10.088	-14.4137	5.89876e-05	-0.0825498	4.81799	0.768651	1
Solyc02g091870	SL3.0ch02	53742967	53744967	+	9	1	42	153	90	21.538	-68.4615	8.34922e-05	-0.00179468	-2.00437	1	1
Solyc02g091880	SL3.0ch02	53745890	53747890	+	45	51	42	181	46.875	18.834	-28.0409	3.98769e-06	0.06624	6.7099	0.836338	1
Solyc02g091970	SL3.0ch02	53822433	53824433	-	1145	226	968	261	83.516	78.763	-4.75246	0.00565056	-0.18367	6.02206	0.530142	1
Solyc02g092040	SL3.0ch02	53887914	53889914	-	102	528	27	301	16.19	8.232	-7.95877	0.00155165	0.0442509	2.29191	0.947087	1
Solyc02g092180	SL3.0ch02	53988393	53990393	+	1438	337	1114	444	81.014	71.502	-9.51216	1.54714e-09	0	-3.8294	1	1
Solyc02g092190	SL3.0ch02	53992432	53994432	+	378	1411	290	1474	21.129	16.44	-4.68921	0.0012443	-3.08469	-3.13472	0.140837	1
Solyc02g092200	SL3.0ch02	53996626	53998626	+	386	516	260	576	42.794	31.1	-11.6933	3.61616e-06	0.396512	1.62196	0.437475	1
Solyc02g092300	SL3.0ch02	54056373	54058373	-	82	51	59	82	61.654	41.844	-19.8102	0.00330299	0.324838	3.4757	0.384638	1
Solyc02g092490	SL3.0ch02	54184978	54186978	-	612	901	525	935	40.449	35.959	-4.49053	0.0252737	-0.34874	4.27108	0.387553	1
Solyc02g092495	SL3.0ch02	54202021	54204021	+	22	363	9	472	5.714	1.871	-3.84318	0.00741955	0.191869	1.4332	0.70674	1
Solyc02g092630	SL3.0ch02	54294687	54296687	-	1486	633	1125	603	70.127	65.104	-5.02325	0.00291222	0.815349	-1.71125	0.480388	1
Solyc02g092650	SL3.0ch02	54306115	54308115	-	511	345	303	361	59.696	45.633	-14.0637	4.4255e-07	0.0639716	3.48998	0.903089	1
Solyc02g092660	SL3.0ch02	54305330	54307330	+	516	404	303	328	56.087	48.019	-8.06794	0.00514466	-0.47213	3.86576	0.203462	1
Solyc02g092980	SL3.0ch02	54571685	54573685	-	745	975	461	1002	43.314	31.511	-11.8034	1.35279e-10	-0.319615	3.59438	0.500503	1
Solyc02g093000	SL3.0ch02	54601201	54603201	-	944	377	842	424	71.461	66.509	-4.95233	0.0145571	-0.192132	4.35435	0.527443	1
Solyc02g093040	SL3.0ch02	54621705	54623705	-	341	531	239	542	39.106	30.602	-8.50371	0.00106578	-0.18193	1.28614	0.734417	1
Solyc02g093070	SL3.0ch02	54645921	54647921	-	1423	299	1234	365	82.636	77.173	-5.46324	0.000376893	-0.753902	-3.17875	0.842777	1
Solyc02g093100	SL3.0ch02	54658446	54660446	+	185	399	132	403	31.678	24.673	-7.00518	0.0201941	-0.231352	4.00931	0.529469	1
Solyc02g093130	SL3.0ch02	54688671	54690671	+	353	421	280	427	45.607	39.604	-6.00327	0.0376088	0.0557312	4.16383	0.859628	1
Solyc02g093240	SL3.0ch02	54806676	54808676	-	1235	179	1104	214	87.341	83.763	-3.5776	0.018637	0	-3.68812	1	1
Solyc02g093330	SL3.0ch02	54864521	54866521	+	1873	232	1710	296	88.979	85.244	-3.73436	0.00131579	0.735675	0.744627	0.44137	1
Solyc02g093365	SL3.0ch02	54892882	54894882	+	76	39	0	78	66.087	0	-66.087	8.07255e-23	0	-3.91086	1	1
Solyc02g093400	SL3.0ch02	54919995	54921995	-	338	1044	253	1024	24.457	19.812	-4.64525	0.0104501	-0.393008	0.587954	0.672923	1
Solyc02g093410	SL3.0ch02	54921706	54923706	+	448	833	146	899	34.973	13.971	-21.0014	3.7009e-30	0.541076	4.38689	0.173617	1
Solyc02g093420	SL3.0ch02	54934663	54936663	+	35	23	0	10	60.345	0	-60.3448	0.00111317	-0.597945	-1.32744	0.559076	1
Solyc02g093460	SL3.0ch02	54959313	54961313	+	1980	454	1997	603	81.348	76.808	-4.53988	0.000328418	-0.259376	3.71503	0.512993	1
Solyc02g093480	SL3.0ch02	54978138	54980138	-	1858	129	1766	237	93.508	88.168	-5.34005	5.13463e-08	-0.429345	1.15199	0.594523	1
Solyc02g093510	SL3.0ch02	54989843	54991843	+	476	313	337	330	60.33	50.525	-9.80479	0.000762324	0.0365887	4.68117	0.901749	1
Solyc02g093530	SL3.0ch02	55009308	55011308	-	68	523	2	300	11.506	0.662	-10.8437	1.08626e-09	-0.150778	5.25341	0.589997	1
Solyc02g093630	SL3.0ch02	55054068	55056068	+	23	48	11	75	32.394	12.791	-19.6037	0.00874512	-0.121122	6.05766	0.650059	1
Solyc02g093650	SL3.0ch02	55064567	55066567	+	513	91	431	113	84.934	79.228	-5.70583	0.0261278	0.393142	-1.197	0.782198	1
Solyc02g093695	SL3.0ch02	55075662	55077662	+	431	13	361	40	97.072	90.025	-7.04713	0.0001224	0.794703	-3.65092	1	1
Solyc02g093710	SL3.0ch02	55097784	55099784	+	1109	49	706	55	95.769	92.773	-2.9959	0.012229	0.649607	4.40219	0.195591	1
Solyc02g093760	SL3.0ch02	55123953	55125953	-	71	63	23	88	52.985	20.721	-32.2644	1.63685e-06	-0.959567	-1.35091	0.500848	1
Solyc02g093820	SL3.0ch02	55163728	55165728	+	1569	389	1295	427	80.133	75.203	-4.92954	0.00118795	-0.0673288	6.20104	0.802646	1
Solyc02g093860	SL3.0ch02	55196447	55198447	+	313	1258	142	1136	19.924	11.111	-8.8125	1.48495e-09	3.97595	3.44025	0.0150132	0.59075
Solyc02g093940	SL3.0ch02	55264553	55266553	-	763	504	683	544	60.221	55.664	-4.55677	0.0410212	-0.194025	3.97315	0.552827	1
Solyc02g094010	SL3.0ch02	55305978	55307978	-	512	481	391	485	51.561	44.635	-6.92622	0.00756265	0.158561	3.72805	0.844831	1
Solyc02g094150	SL3.0ch02	55411263	55413263	+	145	76	105	101	65.611	50.971	-14.64	0.00614705	-0.0908082	4.15707	0.785937	1
Solyc03g005000	SL3.0ch03	14600	16600	+	1687	71	1316	81	95.961	94.202	-1.75946	0.0420465	0	-3.86962	1	1
Solyc03g005120	SL3.0ch03	81266	83266	-	993	420	903	522	70.276	63.368	-6.90759	0.000384338	-0.251534	5.59847	0.409148	1
Solyc03g005200	SL3.0ch03	120032	122032	-	350	242	297	291	59.122	50.51	-8.61142	0.00847802	0	-3.91086	1	1
Solyc03g005210	SL3.0ch03	120224	122224	+	467	250	384	307	65.132	55.572	-9.56086	0.00092976	0	-3.34443	1	1
Solyc03g005240	SL3.0ch03	137625	139625	+	1018	414	801	408	71.089	66.253	-4.83628	0.0170665	1.9013	-3.87171	1	1
Solyc03g005250	SL3.0ch03	148167	150167	-	69	21	169	105	76.667	61.679	-14.9878	0.0216833	0.199846	4.03357	0.508267	1
Solyc03g005270	SL3.0ch03	160535	162535	-	454	123	406	171	78.683	70.364	-8.31889	0.00415146	0.347304	6.36848	0.230217	1
Solyc03g005320	SL3.0ch03	185471	187471	-	1121	487	884	485	69.714	64.573	-5.14125	0.00812786	-0.158227	-2.43223	1	1
Solyc03g005400	SL3.0ch03	258599	260599	-	1329	219	947	228	85.853	80.596	-5.25697	0.00107694	0	-3.91086	1	1
Solyc03g005410	SL3.0ch03	288255	290255	-	818	428	678	481	65.65	58.499	-7.15137	0.00119195	0.0439385	6.13463	0.867566	1
Solyc03g005470	SL3.0ch03	363957	365957	+	508	889	438	981	36.364	30.867	-5.49683	0.00565722	0.189981	6.87399	0.66408	1
Solyc03g005620	SL3.0ch03	450994	452994	-	318	53	367	98	85.714	78.925	-6.78955	0.023118	-0.883032	-1.87529	0.547871	1
Solyc03g005650	SL3.0ch03	467978	469978	-	1061	764	709	776	58.137	47.744	-10.3929	2.79144e-08	0	-3.66258	1	1
Solyc03g005660	SL3.0ch03	467597	469597	+	1061	748	704	625	58.651	52.972	-5.67903	0.00477449	0.30268	3.89654	0.332493	1
Solyc03g005680	SL3.0ch03	488722	490722	-	1169	310	1168	398	79.04	74.585	-4.45496	0.00969531	0.383559	5.89174	0.156656	1
Solyc03g005810	SL3.0ch03	552971	554971	-	432	281	231	206	60.589	52.86	-7.72865	0.0235941	0.210939	-0.957576	0.877514	1
Solyc03g005820	SL3.0ch03	558030	560030	-	737	494	599	657	59.87	47.691	-12.1789	1.40473e-08	-1.94111	-0.573193	0.123626	1
Solyc03g005830	SL3.0ch03	569598	571598	-	531	246	302	269	68.34	52.89	-15.4501	9.39585e-08	-0.00776696	4.38841	0.983136	1
Solyc03g005840	SL3.0ch03	573031	575031	-	772	167	748	300	82.215	71.374	-10.8411	1.24455e-07	0	-3.91086	1	1
Solyc03g005860	SL3.0ch03	579461	581461	+	1098	437	804	540	71.531	59.821	-11.7095	6.02652e-10	0	-3.91086	1	1
Solyc03g005880	SL3.0ch03	595848	597848	-	1139	451	804	534	71.635	60.09	-11.5455	7.4018e-10	-1.41969	-0.862392	0.0874194	1
Solyc03g005900	SL3.0ch03	607498	609498	+	592	254	552	323	69.976	63.086	-6.89065	0.00669061	-6.52001	-1.28744	0.000325152	0.046151
Solyc03g005950	SL3.0ch03	641044	643044	-	812	288	617	300	73.818	67.285	-6.53356	0.00393884	1.89868	-3.83472	1	1
Solyc03g005960	SL3.0ch03	644198	646198	+	974	566	725	578	63.247	55.641	-7.60592	0.00018177	0.256429	-0.0509223	0.793677	1
Solyc03g005990	SL3.0ch03	672405	674405	-	1236	629	947	590	66.273	61.614	-4.65993	0.0118062	-0.225603	3.92823	0.555854	1
Solyc03g006000	SL3.0ch03	673897	675897	+	1279	377	1308	471	77.234	73.524	-3.70985	0.0250951	0.110623	5.35006	0.709147	1
Solyc03g006010	SL3.0ch03	681756	683756	+	1014	708	689	848	58.885	44.828	-14.0574	2.56104e-14	1.7507	5.54821	0.00143132	0.141034
Solyc03g006020	SL3.0ch03	691993	693993	-	1547	551	1287	574	73.737	69.156	-4.58052	0.00418745	-0.0509573	3.39748	0.900883	1
Solyc03g006040	SL3.0ch03	724666	726666	+	1584	475	1362	594	76.931	69.632	-7.29865	1.40763e-06	0	-3.91086	1	1
Solyc03g006140	SL3.0ch03	799778	801778	-	1419	355	1065	336	79.989	76.017	-3.9716	0.0159594	0.110232	6.87956	0.667795	1
Solyc03g006160	SL3.0ch03	816025	818025	+	241	227	217	285	51.496	43.227	-8.26863	0.0210596	1.78827	-3.87428	1	1
Solyc03g006170	SL3.0ch03	826646	828646	-	159	27	78	34	85.484	69.643	-15.841	0.00468182	0	-3.91086	1	1
Solyc03g006173	SL3.0ch03	825217	827217	+	327	64	414	149	83.632	73.535	-10.0971	0.000944202	-0.39931	2.46041	0.396471	1
Solyc03g006190	SL3.0ch03	832101	834101	-	1338	755	987	714	63.927	58.025	-5.90269	0.000824098	0.389886	0.0930417	0.624028	1
Solyc03g006177	SL3.0ch03	831967	833967	-	1235	748	916	705	62.279	56.508	-5.77105	0.00162943	0.45701	2.43454	0.243959	1
Solyc03g006200	SL3.0ch03	831528	833528	+	842	328	746	369	71.966	66.906	-5.05998	0.0200139	0	-3.91086	1	1
Solyc03g006230	SL3.0ch03	855404	857404	+	442	487	378	538	47.578	41.266	-6.31167	0.0147214	0	-3.91086	1	1
Solyc03g006260	SL3.0ch03	885678	887678	-	1340	837	1131	991	61.553	53.299	-8.25382	4.06656e-07	0.36347	0.922579	0.673144	1
Solyc03g006310	SL3.0ch03	907556	909556	+	1940	273	1791	372	87.664	82.802	-4.86214	3.37488e-05	0.137463	4.02566	0.753233	1
Solyc03g006370	SL3.0ch03	969110	971110	-	329	31	147	36	91.389	80.328	-11.061	0.00155875	-0.0500041	0.964007	0.947899	1
Solyc03g006420	SL3.0ch03	1022898	1024898	-	653	592	510	608	52.45	45.617	-6.83263	0.00291904	-0.147906	4.1116	0.659349	1
Solyc03g006440	SL3.0ch03	1038999	1040999	-	423	179	333	197	70.266	62.83	-7.43559	0.0198782	0	-3.44842	1	1
Solyc03g006500	SL3.0ch03	1077181	1079181	+	720	624	499	528	53.571	48.588	-4.98331	0.0309305	0.198128	4.53662	0.58126	1
Solyc03g006565	SL3.0ch03	1127838	1129838	+	700	159	601	180	81.49	76.953	-4.53748	0.0423879	0	-3.91086	1	1
Solyc03g006600	SL3.0ch03	1180849	1182849	-	757	730	581	725	50.908	44.487	-6.42089	0.00227047	4.89707	-2.16148	0.00158232	0.149329
Solyc03g006630	SL3.0ch03	1206241	1208241	-	881	582	759	662	60.219	53.413	-6.80564	0.00083194	0.311597	3.57823	0.52821	1
Solyc03g006680	SL3.0ch03	1250975	1252975	+	1090	423	914	496	72.042	64.823	-7.21961	0.000133556	0.108442	6.03186	0.676471	1
Solyc03g006780	SL3.0ch03	1306128	1308128	+	412	75	344	165	84.6	67.583	-17.0161	4.4244e-09	0	-3.6971	1	1
Solyc03g006810	SL3.0ch03	1318323	1320323	+	806	535	655	685	60.104	48.881	-11.2238	5.96062e-08	0.388767	0.354733	0.511186	1
Solyc03g006840	SL3.0ch03	1351455	1353455	+	822	661	656	628	55.428	51.09	-4.33784	0.0425962	-1.71719	-0.377851	0.0774841	1
Solyc03g006850	SL3.0ch03	1372153	1374153	-	117	30	68	35	79.592	66.019	-13.5724	0.0353751	0.129734	3.92729	0.678122	1
Solyc03g006880	SL3.0ch03	1406546	1408546	+	682	601	466	676	53.157	40.806	-12.3511	1.43109e-08	-3.38379	-2.19536	0.0155448	0.599993
Solyc03g006890	SL3.0ch03	1421023	1423023	+	1357	303	1199	391	81.747	75.409	-6.33818	6.39174e-05	0	-3.91086	1	1
Solyc03g006910	SL3.0ch03	1475146	1477146	-	666	777	506	720	46.154	41.272	-4.88142	0.0245366	0.57732	-3.73108	1	1
Solyc03g006940	SL3.0ch03	1506759	1508759	+	542	587	411	554	48.007	42.591	-5.41641	0.0268138	-4.80941	-3.56523	0.0806689	1
Solyc03g007000	SL3.0ch03	1554895	1556895	-	20	1	12	51	95.238	19.048	-76.1905	4.59564e-09	0.410455	5.11456	0.217428	1
Solyc03g007020	SL3.0ch03	1566176	1568176	-	2106	719	653	423	74.549	60.688	-13.8609	1.93849e-15	0	-3.91086	1	1
Solyc03g007030	SL3.0ch03	1573515	1575515	-	1196	746	804	648	61.586	55.372	-6.21409	0.000999396	-2.93723	0.714253	0.000434482	0.0563064
Solyc03g007040	SL3.0ch03	1574227	1576227	+	621	646	403	735	49.013	35.413	-13.6004	2.42912e-10	0.229823	4.49166	0.42049	1
Solyc03g007150	SL3.0ch03	1733323	1735323	+	52	494	6	288	9.524	2.041	-7.48299	6.88462e-05	0.0164913	2.04805	0.990361	1
Solyc03g007200	SL3.0ch03	1771907	1773907	+	1234	308	1060	350	80.026	75.177	-4.84864	0.00462541	2.02152	-2.63204	0.277673	1
Solyc03g007220	SL3.0ch03	1781276	1783276	+	1095	245	835	265	81.716	75.909	-5.80733	0.00177253	-0.150115	3.42901	0.817152	1
Solyc03g007330	SL3.0ch03	1889183	1891183	+	76	43	36	46	63.866	43.902	-19.9631	0.0137897	-0.224709	4.80713	0.471711	1
Solyc03g007360	SL3.0ch03	1912328	1914328	-	320	360	315	457	47.059	40.803	-6.25571	0.0323218	-1.2883	1.79611	0.103201	1
Solyc03g007350	SL3.0ch03	1905175	1907175	+	1166	877	1116	1056	57.073	51.381	-5.69172	0.00084149	0	-3.91086	1	1
Solyc03g007370	SL3.0ch03	1920347	1922347	-	2371	782	2028	866	75.198	70.076	-5.1222	4.58179e-05	-0.167369	4.36395	0.639901	1
Solyc03g007380	SL3.0ch03	1927428	1929428	+	799	817	495	822	49.443	37.585	-11.8576	1.68285e-09	2.5963	2.5152	0.0172472	0.632363
Solyc03g007395	SL3.0ch03	1934374	1936374	+	128	99	31	76	56.388	28.972	-27.4157	2.27613e-05	0.134502	1.44146	0.821058	1
Solyc03g007450	SL3.0ch03	2002696	2004696	+	1038	631	882	707	62.193	55.507	-6.68632	0.000473503	-1.91428	-3.87151	1	1
Solyc03g007470	SL3.0ch03	2047569	2049569	-	2033	1016	1592	947	66.678	62.702	-3.97575	0.00530573	0.386579	7.9692	0.272676	1
Solyc03g007580	SL3.0ch03	2128864	2130864	-	2300	282	2132	333	89.078	86.491	-2.58736	0.0119268	1.78827	-3.87428	1	1
Solyc03g007590	SL3.0ch03	2142680	2144680	-	56	34	0	20	62.222	0	-62.2222	6.13917e-07	-0.586714	4.18101	0.0817762	1
Solyc03g007595	SL3.0ch03	2142680	2144680	-	56	34	0	20	62.222	0	-62.2222	6.13917e-07	0	-3.91086	1	1
Solyc03g007620	SL3.0ch03	2157766	2159766	+	2270	624	1800	665	78.438	73.022	-5.41584	2.58038e-05	0.120135	5.00147	0.67345	1
Solyc03g007910	SL3.0ch03	2422899	2424899	+	623	430	597	591	59.164	50.253	-8.91177	0.000122663	4.63761	-3.61738	0.244994	1
Solyc03g007970	SL3.0ch03	2455357	2457357	+	772	1427	663	1446	35.107	31.437	-3.67017	0.0219375	-0.232262	2.29643	0.630653	1
Solyc03g007980	SL3.0ch03	2466106	2468106	-	1214	485	1025	526	71.454	66.086	-5.3674	0.00323654	-0.169278	5.24898	0.584366	1
Solyc03g007990	SL3.0ch03	2467193	2469193	+	1420	507	1110	501	73.69	68.901	-4.78837	0.00516266	0.267199	6.31321	0.45585	1
Solyc03g025160	SL3.0ch03	2640637	2642637	-	841	430	707	497	66.168	58.721	-7.44744	0.000520804	0.000746935	4.09071	1	1
Solyc03g025210	SL3.0ch03	2699868	2701868	+	959	798	869	856	54.582	50.377	-4.20486	0.0261186	0.560391	-2.39215	0.759997	1
Solyc03g025430	SL3.0ch03	2873679	2875679	+	764	466	734	566	62.114	56.462	-5.65228	0.00978068	0	-3.91086	1	1
Solyc03g025455	SL3.0ch03	2896853	2898853	-	1140	1015	980	1016	52.9	49.098	-3.80204	0.0295008	0.771848	1.18014	0.239811	1
Solyc03g025460	SL3.0ch03	2898298	2900298	+	1451	377	1225	423	79.376	74.333	-5.04384	0.00148345	0	-3.86689	1	1
Solyc03g025480	SL3.0ch03	2908582	2910582	+	1502	415	1387	457	78.352	75.217	-3.13467	0.0437139	0.314205	3.36965	0.415782	1
Solyc03g025540	SL3.0ch03	2967332	2969332	-	737	421	570	511	63.644	52.729	-10.9153	1.30327e-06	0.288867	4.93464	0.270867	1
Solyc03g025570	SL3.0ch03	2992052	2994052	-	422	335	416	425	55.746	49.465	-6.28144	0.0244714	-1.36195	-1.56211	0.18274	1
Solyc03g025617	SL3.0ch03	3048653	3050653	+	425	10	630	37	97.701	94.453	-3.24838	0.0193041	0.23486	0.873875	0.743474	1
Solyc03g025770	SL3.0ch03	3192046	3194046	-	287	426	203	444	40.252	31.376	-8.87687	0.0021685	0	-3.91086	1	1
Solyc03g025790	SL3.0ch03	3204301	3206301	+	1207	570	884	541	67.923	62.035	-5.88838	0.00167899	0	-3.91086	1	1
Solyc03g025840	SL3.0ch03	3262615	3264615	+	493	1260	291	1063	28.123	21.492	-6.63134	0.000121772	-0.0552608	6.81549	0.852712	1
Solyc03g025870	SL3.0ch03	3285457	3287457	-	131	182	56	201	41.853	21.79	-20.0632	3.19886e-06	0.0370812	-1.0728	1	1
Solyc03g025920	SL3.0ch03	3353409	3355409	+	2364	294	2121	352	88.939	85.766	-3.17278	0.00203816	0.165241	3.8532	0.62671	1
Solyc03g025927	SL3.0ch03	3371643	3373643	+	892	1433	742	1384	38.366	34.901	-3.46437	0.0336317	0.657136	0.638535	0.284271	1
Solyc03g025935	SL3.0ch03	3391443	3393443	+	84	34	91	71	71.186	56.173	-15.0136	0.02474	-4.31161	-3.64138	0.288952	1
Solyc03g025950	SL3.0ch03	3407926	3409926	+	789	549	588	505	58.969	53.797	-5.17172	0.0221341	0.202189	7.84878	0.466192	1
Solyc03g025980	SL3.0ch03	3425907	3427907	+	1298	120	1126	237	91.537	82.612	-8.92549	3.37338e-11	0.0111613	5.40858	0.969386	1
Solyc03g026240	SL3.0ch03	3704171	3706171	-	81	0	67	5	100	93.056	-6.94444	0.0385726	-0.0885623	4.76346	0.765904	1
Solyc03g026290	SL3.0ch03	3754223	3756223	-	1003	667	725	625	60.06	53.704	-6.35618	0.00165143	0.101121	4.42244	0.72969	1
Solyc03g026350	SL3.0ch03	3807310	3809310	+	1500	289	1382	329	83.846	80.771	-3.07425	0.0347255	0.0747051	5.72185	0.773269	1
Solyc03g026377	SL3.0ch03	3869525	3871525	-	813	42	796	150	95.088	84.144	-10.944	2.64948e-13	0	-3.91086	1	1
Solyc03g031410	SL3.0ch03	3991776	3993776	-	755	224	422	327	77.12	56.342	-20.7777	2.5848e-18	0	-3.91086	1	1
Solyc03g031460	SL3.0ch03	4026574	4028574	+	960	376	798	489	71.856	62.005	-9.85163	6.85541e-07	0	-3.91086	1	1
Solyc03g031510	SL3.0ch03	4054433	4056433	-	901	339	527	428	72.661	55.183	-17.478	6.56605e-16	0	-3.76338	1	1
Solyc03g031520	SL3.0ch03	4057237	4059237	-	450	710	315	626	38.793	33.475	-5.31808	0.0244233	0	-3.91086	1	1
Solyc03g031570	SL3.0ch03	4094681	4096681	-	1660	458	1295	469	78.376	73.413	-4.96313	0.00113957	0.272774	-2.98935	0.922815	1
Solyc03g031600	SL3.0ch03	4118012	4120012	-	878	66	779	99	93.008	88.724	-4.2841	0.0050085	-0.038968	5.54986	0.925912	1
Solyc03g031610	SL3.0ch03	4121413	4123413	-	130	15	72	29	89.655	71.287	-18.368	0.0011221	0	-3.74492	1	1
Solyc03g031680	SL3.0ch03	4158552	4160552	+	699	480	529	503	59.288	51.26	-8.02784	0.0006136	-0.50918	2.07176	0.275849	1
Solyc03g031700	SL3.0ch03	4194221	4196221	-	1253	291	997	430	81.153	69.867	-11.286	1.32318e-11	-0.41178	5.55473	0.252157	1
Solyc03g031710	SL3.0ch03	4194222	4196222	+	1253	291	997	430	81.153	69.867	-11.286	1.32318e-11	0	-3.91086	1	1
Solyc03g031720	SL3.0ch03	4205108	4207108	-	628	285	740	437	68.784	62.872	-5.91252	0.0123861	0.345576	4.96174	0.247575	1
Solyc03g031820	SL3.0ch03	4327583	4329583	-	1153	381	1085	455	75.163	70.455	-4.70843	0.00864966	0.536007	4.15827	0.10084	1
Solyc03g031870	SL3.0ch03	4358603	4360603	+	1351	245	1242	426	84.649	74.46	-10.1887	9.56022e-12	0	-3.27001	1	1
Solyc03g031880	SL3.0ch03	4373909	4375909	-	1648	638	1368	617	72.091	68.917	-3.17411	0.0424464	0.46136	-0.889895	0.645707	1
Solyc03g031900	SL3.0ch03	4395418	4397418	-	249	72	143	127	77.57	52.963	-24.6071	5.03099e-09	0.821112	-2.79567	0.61556	1
Solyc03g031910	SL3.0ch03	4401357	4403357	-	2241	646	1886	759	77.624	71.304	-6.31948	6.13917e-07	0.263304	5.46293	0.68715	1
Solyc03g031970	SL3.0ch03	4482894	4484894	+	1841	1002	1392	1004	64.756	58.097	-6.65871	5.45305e-06	-0.249599	6.37863	0.358155	1
Solyc03g032020	SL3.0ch03	4545973	4547973	-	1371	220	909	276	86.172	76.709	-9.46336	2.23487e-09	0.151662	4.18454	0.739573	1
Solyc03g032035	SL3.0ch03	4577557	4579557	+	1300	659	1129	703	66.36	61.627	-4.73375	0.00665273	-4.38879	-1.95405	0.00316359	0.238222
Solyc03g032040	SL3.0ch03	4579412	4581412	+	92	174	37	196	34.586	15.88	-18.7066	1.26283e-05	-1.26265	5.28351	0.00744457	0.409657
Solyc03g032190	SL3.0ch03	4714714	4716714	+	917	851	738	894	51.867	45.221	-6.64593	0.000475758	-0.405112	-0.31375	0.786368	1
Solyc03g032210	SL3.0ch03	4738920	4740920	+	1149	520	861	552	68.844	60.934	-7.90944	2.95303e-05	-0.978613	1.86342	0.106892	1
Solyc03g033370	SL3.0ch03	4961255	4963255	-	115	96	48	88	54.502	35.294	-19.2083	0.00196225	0.342205	1.95412	0.465255	1
Solyc03g033470	SL3.0ch03	5046785	5048785	+	66	11	47	30	85.714	61.039	-24.6753	0.00271006	-0.36426	-0.697607	0.635117	1
Solyc03g033480	SL3.0ch03	5046785	5048785	+	66	11	47	30	85.714	61.039	-24.6753	0.00271006	0.348527	3.03252	0.364345	1
Solyc03g033535	SL3.0ch03	5100369	5102369	-	505	277	398	310	64.578	56.215	-8.36332	0.00298058	0.843243	-1.02704	0.514673	1
Solyc03g033630	SL3.0ch03	5243292	5245292	+	1412	76	1131	88	94.892	92.781	-2.11151	0.0414783	-0.0982783	5.4902	0.704037	1
Solyc03g033640	SL3.0ch03	5253971	5255971	+	2380	619	1687	661	79.36	71.848	-7.5114	2.51523e-09	0.313825	5.75072	0.276264	1
Solyc03g033740	SL3.0ch03	5361067	5363067	-	344	8	288	28	97.727	91.139	-6.58803	0.000780277	0.116761	1.40101	0.831751	1
Solyc03g033810	SL3.0ch03	5445482	5447482	+	171	57	161	124	75	56.491	-18.5088	6.41289e-05	0.951084	-0.36578	0.240028	1
Solyc03g033830	SL3.0ch03	5466742	5468742	-	1132	147	998	186	88.507	84.291	-4.21611	0.00670695	-1.02882	-0.0851527	0.176097	1
Solyc03g033835	SL3.0ch03	5465397	5467397	+	85	108	3	35	44.041	7.895	-36.1467	7.13955e-05	2.47235	-1.79248	0.110667	1
Solyc03g033850	SL3.0ch03	5473298	5475298	+	1266	211	1288	275	85.714	82.406	-3.30866	0.0261888	0.17803	3.04878	0.604747	1
Solyc03g033860	SL3.0ch03	5491634	5493634	-	1955	612	1553	571	76.159	73.117	-3.04218	0.0337489	-2.44314	-3.65539	0.470705	1
Solyc03g033980	SL3.0ch03	5707443	5709443	+	1084	611	921	618	63.953	59.844	-4.10875	0.0316411	0.40277	4.09587	0.214966	1
Solyc03g034250	SL3.0ch03	5976870	5978870	-	606	387	500	554	61.027	47.438	-13.5889	1.03714e-08	0.180168	4.72737	0.7007	1
Solyc03g034267	SL3.0ch03	6035121	6037121	+	268	491	150	558	35.31	21.186	-14.1232	2.42647e-08	0	-3.91086	1	1
Solyc03g034395	SL3.0ch03	6330680	6332680	-	1106	98	963	119	91.86	89.002	-2.85862	0.0396049	-1.28587	0.768499	0.0490958	0.99772
Solyc03g034413	SL3.0ch03	6405148	6407148	-	133	238	54	306	35.849	15	-20.8491	1.10801e-09	0	-3.91086	1	1
Solyc03g034450	SL3.0ch03	6439662	6441662	+	573	378	417	357	60.252	53.876	-6.3764	0.017648	0.310262	3.86078	0.329493	1
Solyc03g043710	SL3.0ch03	7250203	7252203	-	1040	85	773	104	92.444	88.141	-4.30305	0.00346661	0	-3.91086	1	1
Solyc03g043740	SL3.0ch03	7287372	7289372	-	719	906	521	780	44.246	40.046	-4.20004	0.0422285	-0.61069	2.53484	0.320361	1
Solyc03g043770	SL3.0ch03	7349812	7351812	+	1052	703	688	701	59.943	49.532	-10.411	6.06557e-08	-1.88182	1.44117	0.0246586	0.745115
Solyc03g043950	SL3.0ch03	7755684	7757684	+	1520	480	1413	566	76	71.4	-4.6003	0.00309176	-0.112239	4.75666	0.739684	1
Solyc03g044026	SL3.0ch03	7873468	7875468	+	649	262	579	296	71.24	66.171	-5.06897	0.038914	-0.909859	-2.47771	0.482246	1
Solyc03g044080	SL3.0ch03	7960244	7962244	-	689	200	544	224	77.503	70.833	-6.66948	0.00601465	0.266531	3.79305	0.46207	1
Solyc03g044150	SL3.0ch03	8242972	8244972	-	1382	1116	1200	1108	55.324	51.993	-3.33119	0.0396948	0.0219457	6.14638	0.950818	1
Solyc03g044180	SL3.0ch03	8428699	8430699	+	621	178	490	214	77.722	69.602	-8.11988	0.00136846	5.64301	2.08409	0.00269666	0.21482
Solyc03g044190	SL3.0ch03	8457454	8459454	+	340	453	215	424	42.875	33.646	-9.22884	0.00132048	-0.0645469	5.83118	0.828337	1
Solyc03g044260	SL3.0ch03	8612991	8614991	+	1290	146	1129	169	89.833	86.98	-2.8529	0.040254	0.22778	6.10926	0.496174	1
Solyc03g044330	SL3.0ch03	8873599	8875599	-	1099	688	1083	819	61.5	56.94	-4.55966	0.0114396	0.0614986	7.44973	0.856097	1
Solyc03g044480	SL3.0ch03	9367307	9369307	-	106	461	55	462	18.695	10.638	-8.05659	0.000808403	-0.47759	-0.87259	0.719721	1
Solyc03g044510	SL3.0ch03	9566520	9568520	+	1350	366	1105	386	78.671	74.111	-4.55999	0.00674889	-0.00905568	2.71349	0.991153	1
Solyc03g044590	SL3.0ch03	10198246	10200246	-	760	138	408	111	84.633	78.613	-6.0198	0.0110496	1.19292	-2.02128	0.598015	1
Solyc03g044660	SL3.0ch03	10321696	10323696	-	1073	884	768	985	54.829	43.811	-11.0182	3.52488e-10	-0.32693	4.6313	0.362173	1
Solyc03g044673	SL3.0ch03	10355766	10357766	+	715	134	603	193	84.217	75.754	-8.46296	9.43135e-05	-0.766982	-0.0454321	0.391278	1
Solyc03g044690	SL3.0ch03	10371389	10373389	+	759	550	621	558	57.983	52.672	-5.31144	0.018389	0	-3.91086	1	1
Solyc03g044810	SL3.0ch03	10576304	10578304	-	195	450	81	438	30.233	15.607	-14.6256	4.86337e-08	-0.822752	-1.4035	0.510572	1
Solyc03g044817	SL3.0ch03	10592361	10594361	-	564	104	424	205	84.431	67.409	-17.0226	9.54082e-12	0	-3.91086	1	1
Solyc03g044880	SL3.0ch03	10783480	10785480	+	1457	237	1200	272	86.009	81.522	-4.48771	0.00213139	0.402925	4.12068	0.211687	1
Solyc03g044980	SL3.0ch03	11248114	11250114	+	588	150	508	206	79.675	71.148	-8.52634	0.000716787	2.36224	-2.34809	0.0524094	1
Solyc03g045080	SL3.0ch03	11508500	11510500	-	196	10	58	9	95.146	86.567	-8.57847	0.0440148	-3.03487	-3.80323	0.522373	1
Solyc03g045085	SL3.0ch03	11513443	11515443	-	620	477	463	453	56.518	50.546	-5.97192	0.0174045	0	-3.91086	1	1
Solyc03g046390	SL3.0ch03	12476080	12478080	-	430	135	358	160	76.106	69.112	-6.99423	0.023151	0.280019	0.32226	0.708721	1
Solyc03g070390	SL3.0ch03	18345243	18347243	+	1370	184	1145	224	88.16	83.638	-4.5219	0.00163298	0.125034	1.13911	0.878617	1
Solyc03g071480	SL3.0ch03	18635650	18637650	+	651	57	636	86	91.949	88.089	-3.86051	0.0323313	0	-3.91086	1	1
Solyc03g071530	SL3.0ch03	19833795	19835795	-	772	119	686	144	86.644	82.651	-3.99362	0.0404377	0	-3.91086	1	1
Solyc03g071540	SL3.0ch03	20095636	20097636	+	66	737	26	595	8.219	4.187	-4.03238	0.00587057	1.76524	0.00835003	0.0399508	0.922721
Solyc03g071620	SL3.0ch03	20408503	20410503	+	1284	169	1027	238	88.369	81.186	-7.18312	1.59733e-06	-0.20055	5.54177	0.545	1
Solyc03g071690	SL3.0ch03	20458053	20460053	-	290	737	145	652	28.238	18.193	-10.0444	4.06493e-06	-1.4174	1.73908	0.0238184	0.731276
Solyc03g071730	SL3.0ch03	20620095	20622095	-	1114	59	1103	93	94.97	92.224	-2.74608	0.015755	-1.94415	-3.63177	1	1
Solyc03g071760	SL3.0ch03	20805872	20807872	-	626	67	491	94	90.332	83.932	-6.40027	0.00215812	0	-3.91086	1	1
Solyc03g051620	SL3.0ch03	21645969	21647969	+	293	25	175	38	92.138	82.16	-9.97874	0.00269497	0	-3.91086	1	1
Solyc03g052980	SL3.0ch03	23552579	23554579	-	960	34	747	63	96.579	92.222	-4.35725	0.000243252	0.00581392	6.95876	0.983607	1
Solyc03g053110	SL3.0ch03	24278111	24280111	-	299	60	239	134	83.287	64.075	-19.2118	3.75835e-08	-0.304882	4.66789	0.483247	1
Solyc03g058150	SL3.0ch03	25291200	25293200	-	887	218	782	260	80.271	75.048	-5.22351	0.0102442	0	-3.91086	1	1
Solyc03g058340	SL3.0ch03	26139137	26141137	+	1157	82	1163	176	93.382	86.856	-6.5259	2.51166e-07	0.192521	3.74129	0.610767	1
Solyc03g058370	SL3.0ch03	26264161	26266161	+	464	677	349	762	40.666	31.413	-9.25294	2.85914e-05	-1.13068	-1.93522	0.432615	1
Solyc03g058470	SL3.0ch03	26984690	26986690	-	1407	417	1419	543	77.138	72.324	-4.814	0.0021119	0.10449	3.95997	0.740007	1
Solyc03g058855	SL3.0ch03	28415730	28417730	-	804	66	756	101	92.414	88.215	-4.19909	0.00828512	0	-3.91086	1	1
Solyc03g058857	SL3.0ch03	28416044	28418044	-	839	75	790	103	91.794	88.466	-3.32847	0.0336261	0	-3.91086	1	1
Solyc03g058910	SL3.0ch03	28823337	28825337	+	1087	178	355	465	85.929	43.293	-42.6362	8.7502e-92	-0.293625	-2.09797	0.871749	1
Solyc03g058920	SL3.0ch03	29068406	29070406	+	566	31	501	50	94.807	90.926	-3.88178	0.0226458	-3.22749	-3.65156	0.351477	1
Solyc03g059035	SL3.0ch03	29691131	29693131	-	622	87	404	120	87.729	77.099	-10.63	6.96323e-06	-1.91427	-3.87151	1	1
Solyc03g059050	SL3.0ch03	29695468	29697468	+	552	211	358	252	72.346	58.689	-13.6575	9.67388e-07	0	-3.91086	1	1
Solyc03g059100	SL3.0ch03	29860966	29862966	-	130	1	42	6	99.237	87.5	-11.7366	0.00451153	-0.011611	5.65251	0.966334	1
Solyc03g059155	SL3.0ch03	30062696	30064696	+	300	80	216	120	78.947	64.286	-14.6617	7.10624e-05	-0.397681	-0.40035	0.634904	1
Solyc03g059390	SL3.0ch03	31234427	31236427	-	949	70	778	87	93.131	89.942	-3.18832	0.0290377	0.0789248	0.0986378	0.922307	1
Solyc03g059430	SL3.0ch03	31918021	31920021	-	60	236	38	274	20.27	12.179	-8.09078	0.0171691	-0.944671	-3.61642	1	1
Solyc03g059435	SL3.0ch03	31928715	31930715	-	1298	105	1650	228	92.516	87.859	-4.65661	5.80572e-05	7.21903	-2.07436	0.000196535	0.0315232
Solyc03g062720	SL3.0ch03	34194827	34196827	-	1457	328	1346	369	81.625	78.484	-3.14068	0.039746	-1.12982	-1.59292	0.246054	1
Solyc03g062750	SL3.0ch03	34286084	34288084	-	2573	733	1781	587	77.828	75.211	-2.61704	0.0392242	0	-3.91086	1	1
Solyc03g062830	SL3.0ch03	34556879	34558879	-	1259	144	1081	195	89.736	84.718	-5.01841	0.000471469	-0.168303	4.83379	0.564558	1
Solyc03g062880	SL3.0ch03	34617986	34619986	-	1403	64	1410	121	95.637	92.097	-3.54069	0.000234713	1.78828	-3.87428	1	1
Solyc03g062940	SL3.0ch03	34743174	34745174	+	1081	176	910	201	85.998	81.908	-4.09022	0.0152992	0.137606	7.59395	0.654352	1
Solyc03g063053	SL3.0ch03	35301586	35303586	+	2058	194	1960	273	91.385	87.774	-3.61114	0.000365621	0	-3.72731	1	1
Solyc03g063060	SL3.0ch03	35301586	35303586	+	2058	194	1960	273	91.385	87.774	-3.61114	0.000365621	0	-3.86745	1	1
Solyc03g063090	SL3.0ch03	35378341	35380341	-	419	390	275	343	51.792	44.498	-7.29395	0.014447	1.70124	-2.65952	0.350981	1
Solyc03g063140	SL3.0ch03	35560715	35562715	-	2167	646	1840	671	77.035	73.278	-3.75762	0.0045355	0	-3.22659	1	1
Solyc03g063150	SL3.0ch03	35603888	35605888	+	605	135	505	203	81.757	71.328	-10.4291	1.79099e-05	0.539365	0.313308	0.368257	1
Solyc03g063180	SL3.0ch03	35726686	35728686	-	877	281	774	336	75.734	69.73	-6.00429	0.00381912	0	-3.91086	1	1
Solyc03g063350	SL3.0ch03	36621522	36623522	-	1559	319	1173	313	83.014	78.937	-4.0771	0.00734422	0.507621	4.78267	0.0649305	1
Solyc03g063550	SL3.0ch03	37089656	37091656	+	511	96	312	101	84.185	75.545	-8.63972	0.00215083	-1.26436	-1.6417	0.306195	1
Solyc03g063600	SL3.0ch03	37404377	37406377	+	982	194	731	229	83.503	76.146	-7.35757	0.000122158	0.150571	8.32009	0.665422	1
Solyc03g063710	SL3.0ch03	37871509	37873509	-	49	128	14	99	27.684	12.389	-15.2942	0.005576	2.77277	-3.69192	0.671938	1
Solyc03g063720	SL3.0ch03	37874243	37876243	+	2077	123	1921	156	94.409	92.489	-1.91992	0.0258545	0.147351	0.423514	0.847118	1
Solyc03g063970	SL3.0ch03	39401199	39403199	-	1902	134	1329	133	93.418	90.903	-2.51559	0.0147661	-0.0739073	3.30108	0.856241	1
Solyc03g065060	SL3.0ch03	41410904	41412904	+	939	497	863	546	65.39	61.249	-4.14086	0.0423879	0	-3.91086	1	1
Solyc03g065200	SL3.0ch03	42571837	42573837	+	211	298	104	301	41.454	25.679	-15.7748	4.30691e-06	0	-3.91086	1	1
Solyc03g013400	SL3.0ch03	46305800	46307800	+	3339	252	2825	299	92.982	90.429	-2.55352	0.000577926	0	-3.91086	1	1
Solyc03g013330	SL3.0ch03	47352610	47354610	-	838	111	902	164	88.303	84.615	-3.68809	0.0309262	0	-3.91086	1	1
Solyc03g013240	SL3.0ch03	47800098	47802098	-	451	463	370	539	49.344	40.704	-8.63947	0.000863703	-0.553509	2.9097	0.241627	1
Solyc03g013060	SL3.0ch03	49083234	49085234	+	710	71	489	97	90.909	83.447	-7.46199	0.00018713	0	-3.91086	1	1
Solyc03g077920	SL3.0ch03	49959611	49961611	-	612	140	465	155	81.383	75	-6.38298	0.0107087	0.0182821	3.01467	0.97205	1
Solyc03g077930	SL3.0ch03	49980802	49982802	+	891	47	912	87	94.989	91.291	-3.69805	0.0045355	0	-3.75977	1	1
Solyc03g077960	SL3.0ch03	50087546	50089546	-	1513	80	1227	102	94.978	92.325	-2.65297	0.00849637	0.88974	-0.271905	0.349985	1
Solyc03g078000	SL3.0ch03	50258747	50260747	+	106	29	91	49	78.519	65	-13.5185	0.0303415	-0.272501	6.17903	0.331405	1
Solyc03g078060	SL3.0ch03	51273961	51275961	+	418	8	325	18	98.122	94.752	-3.36988	0.0282938	0.0904777	2.21339	0.837031	1
Solyc03g078120	SL3.0ch03	51519753	51521753	-	763	37	818	67	95.375	92.429	-2.94562	0.028361	0.381955	5.21085	0.187681	1
Solyc03g078190	SL3.0ch03	51594359	51596359	-	1780	182	1258	174	90.724	87.849	-2.87459	0.0166362	0	-3.87283	1	1
Solyc03g078207	SL3.0ch03	51602956	51604956	-	728	138	513	183	84.065	73.707	-10.3578	4.14109e-06	0	-3.91086	1	1
Solyc03g078300	SL3.0ch03	51762970	51764970	+	1178	48	1339	84	96.085	94.097	-1.98785	0.0364072	0.796053	3.88594	0.0436938	0.957417
Solyc03g078515	SL3.0ch03	52484962	52486962	-	351	16	260	33	95.64	88.737	-6.90313	0.00275541	0.212963	-0.598061	0.859902	1
Solyc03g078530	SL3.0ch03	52501426	52503426	+	977	522	701	450	65.177	60.904	-4.27322	0.0442272	0	-3.91086	1	1
Solyc03g078600	SL3.0ch03	52654523	52656523	+	1368	179	996	180	88.429	84.694	-3.73534	0.0117228	0	-3.91086	1	1
Solyc03g078620	SL3.0ch03	52665398	52667398	-	497	461	442	503	51.879	46.772	-5.10643	0.0475409	1.95239	-3.75099	1	1
Solyc03g079850	SL3.0ch03	53097195	53099195	-	511	1008	454	1079	33.641	29.615	-4.02542	0.0329928	0.433969	4.48188	0.175905	1
Solyc03g079880	SL3.0ch03	53113020	53115020	+	736	47	718	71	93.997	91.001	-2.99618	0.0471917	3.76771	-3.0503	0.231211	1
Solyc03g079910	SL3.0ch03	53222707	53224707	-	1908	158	1549	240	92.352	86.585	-5.76769	6.12057e-08	-0.172093	8.87093e-05	0.841431	1
Solyc03g079900	SL3.0ch03	53214605	53216605	+	1396	416	1153	438	77.042	72.47	-4.5718	0.00600842	0	-3.91086	1	1
Solyc03g080075	SL3.0ch03	53387819	53389819	+	135	828	76	873	14.019	8.008	-6.01026	0.000137786	-1.64337	-2.02986	0.208133	1
Solyc03g080110	SL3.0ch03	53438773	53440773	+	95	155	95	330	38	22.353	-15.6471	9.49641e-05	0.499571	1.17867	0.627015	1
Solyc03g080120	SL3.0ch03	53450566	53452566	+	829	479	478	493	63.379	49.228	-14.1516	2.5025e-10	0.128186	0.744526	0.905382	1
Solyc03g080160	SL3.0ch03	53481791	53483791	-	70	322	24	248	17.857	8.824	-9.03361	0.0029237	0.477587	7.45938	0.088088	1
Solyc03g081190	SL3.0ch03	53538896	53540896	-	94	100	100	227	48.454	30.581	-17.8726	0.000238335	-0.243628	0.410082	0.670002	1
Solyc03g081200	SL3.0ch03	53537037	53539037	+	1148	367	1197	508	75.776	70.205	-5.5703	0.00138166	0.737238	2.36571	0.0893476	1
Solyc03g081203	SL3.0ch03	53537667	53539667	+	403	383	354	513	51.272	40.83	-10.4418	0.000104232	0.138485	0.339175	0.858602	1
Solyc03g081220	SL3.0ch03	53549117	53551117	+	725	306	630	363	70.32	63.444	-6.87597	0.00324585	0.0183269	5.24671	0.944129	1
Solyc03g081260	SL3.0ch03	53588574	53590574	-	624	53	429	58	92.171	88.09	-4.081	0.0369487	-0.309768	4.40868	0.464057	1
Solyc03g081270	SL3.0ch03	53588574	53590574	-	624	53	429	58	92.171	88.09	-4.081	0.0369487	-1.00596	-0.52156	0.196959	1
Solyc03g082355	SL3.0ch03	53726704	53728704	-	1179	133	919	163	89.863	84.935	-4.9275	0.00102926	0.773629	-1.23018	0.463161	1
Solyc03g082400	SL3.0ch03	53772791	53774791	+	382	838	292	803	31.311	26.667	-4.64481	0.0291505	0.707549	3.49257	0.108673	1
Solyc03g082520	SL3.0ch03	53884863	53886863	-	1889	721	1566	747	72.375	67.704	-4.6712	0.00127121	0.232999	2.95383	0.780492	1
Solyc03g082540	SL3.0ch03	53896385	53898385	-	1018	949	865	998	51.754	46.43	-5.32345	0.0032078	-0.331879	4.78286	0.285336	1
Solyc03g082620	SL3.0ch03	53969158	53971158	-	771	294	626	347	72.394	64.337	-8.05726	0.000435568	0.363647	3.90515	0.550827	1
Solyc03g082630	SL3.0ch03	53969175	53971175	+	771	294	626	347	72.394	64.337	-8.05726	0.000435568	-0.466172	3.37877	0.195086	1
Solyc03g082760	SL3.0ch03	54067975	54069975	-	552	270	414	386	67.153	51.75	-15.4033	4.08467e-09	0	-3.91086	1	1
Solyc03g082850	SL3.0ch03	54132076	54134076	-	1625	251	1375	360	86.62	79.251	-7.36975	4.29884e-08	0.130037	5.16907	0.638881	1
Solyc03g082860	SL3.0ch03	54171199	54173199	+	561	177	449	276	76.016	61.931	-14.0852	7.29401e-08	-0.161871	0.725763	0.816496	1
Solyc03g082910	SL3.0ch03	54216053	54218053	+	47	247	8	208	15.986	3.704	-12.2827	2.71e-05	0.173071	5.29989	0.541123	1
Solyc03g082950	SL3.0ch03	54239361	54241361	+	799	311	471	431	71.982	52.217	-19.7647	3.18703e-18	-0.537102	-3.31484	0.846192	1
Solyc03g083040	SL3.0ch03	54298613	54300613	+	744	502	517	546	59.711	48.636	-11.0751	9.90747e-07	0	-3.91086	1	1
Solyc03g083070	SL3.0ch03	54332459	54334459	-	780	911	544	820	46.127	39.883	-6.24385	0.00179905	-0.292447	5.67079	0.335739	1
Solyc03g083090	SL3.0ch03	54335366	54337366	-	192	14	18	27	93.204	40	-53.2039	3.05304e-13	-0.602345	5.30097	0.141736	1
Solyc03g083210	SL3.0ch03	54475702	54477702	+	1983	207	1661	232	90.548	87.744	-2.80362	0.0107025	-0.302161	4.23928	0.364352	1
Solyc03g083280	SL3.0ch03	54550363	54552363	-	1894	529	1835	637	78.168	74.231	-3.93617	0.00366252	0.201332	5.5948	0.581654	1
Solyc03g083310	SL3.0ch03	54566658	54568658	-	1540	329	1286	396	82.397	76.457	-5.9404	6.22274e-05	0.0701861	4.74616	0.813012	1
Solyc03g083385	SL3.0ch03	54658908	54660908	+	610	197	466	204	75.589	69.552	-6.03636	0.020381	0	-3.91086	1	1
Solyc03g083410	SL3.0ch03	54704789	54706789	+	272	694	165	615	28.157	21.154	-7.0035	0.0025782	0.189029	3.98845	0.559936	1
Solyc03g083420	SL3.0ch03	54716522	54718522	+	208	628	84	461	24.88	15.413	-9.46754	0.000102704	0.198137	6.52342	0.4915	1
Solyc03g083430	SL3.0ch03	54734540	54736540	-	1307	103	993	133	92.695	88.188	-4.50676	0.000454689	0.168761	6.86394	0.579689	1
Solyc03g083530	SL3.0ch03	54898113	54900113	+	1041	188	868	243	84.703	78.128	-6.5752	0.000213094	0.272934	9.28843	0.40683	1
Solyc03g083540	SL3.0ch03	54908059	54910059	+	1054	461	851	476	69.571	64.13	-5.44134	0.00620429	-0.159391	5.02208	0.620172	1
Solyc03g083550	SL3.0ch03	54919187	54921187	-	717	752	384	719	48.809	34.814	-13.9946	2.20359e-11	-0.218386	1.20442	0.647702	1
Solyc03g083665	SL3.0ch03	55049873	55051873	+	1522	57	1271	83	96.39	93.87	-2.52011	0.00467517	4.16576	-2.64167	0.180554	1
Solyc03g083720	SL3.0ch03	55084325	55086325	-	678	829	572	847	44.99	40.31	-4.67997	0.0224952	-0.197075	-3.2473	1	1
Solyc03g083770	SL3.0ch03	55131320	55133320	+	408	461	297	482	46.951	38.126	-8.82472	0.00114388	-2.50129	1.96268	0.000136982	0.0239004
Solyc03g083810	SL3.0ch03	55146051	55148051	-	649	287	555	307	69.338	64.385	-4.95246	0.0469447	1.79591	-3.45541	1	1
Solyc03g083830	SL3.0ch03	55155605	55157605	-	1155	95	987	143	92.4	87.345	-5.05487	0.000222344	0	-3.91086	1	1
Solyc03g083900	SL3.0ch03	55256897	55258897	-	853	952	801	1092	47.258	42.314	-4.94383	0.00673425	0.643971	4.45262	0.127894	1
Solyc03g091030	SL3.0ch03	55594855	55596855	+	335	94	263	150	78.089	63.68	-14.4082	2.75639e-05	1.90129	-3.87171	1	1
Solyc03g093110	SL3.0ch03	55713947	55715947	-	1371	212	1007	243	86.608	80.56	-6.04771	7.47907e-05	0.110833	7.0054	0.869777	1
Solyc03g093170	SL3.0ch03	55811218	55813218	-	135	582	58	452	18.828	11.373	-7.4559	0.00147705	0	-3.75218	1	1
Solyc03g093210	SL3.0ch03	55826556	55828556	+	738	344	593	365	68.207	61.9	-6.30723	0.0073314	0.374333	2.90686	0.422895	1
Solyc03g093280	SL3.0ch03	55885910	55887910	+	397	682	311	695	36.793	30.915	-5.87881	0.0111877	0	-3.91086	1	1
Solyc03g093290	SL3.0ch03	55894270	55896270	+	757	401	631	429	65.371	59.528	-5.84303	0.0115074	0	-3.91086	1	1
Solyc03g093310	SL3.0ch03	55915910	55917910	-	3573	358	3117	414	90.893	88.275	-2.61763	0.000802899	-2.34311	-1.08578	0.102095	1
Solyc03g093330	SL3.0ch03	56001413	56003413	-	344	270	277	299	56.026	48.09	-7.93578	0.0143337	-0.994468	-0.426769	0.214099	1
Solyc03g093380	SL3.0ch03	56073832	56075832	+	1225	442	1009	452	73.485	69.062	-4.42302	0.0154167	-0.350462	1.9509	0.438787	1
Solyc03g093390	SL3.0ch03	56084266	56086266	-	439	889	280	930	33.057	23.14	-9.91673	2.98813e-07	0	-3.91086	1	1
Solyc03g093510	SL3.0ch03	56282767	56284767	+	876	1204	673	1108	42.115	37.788	-4.32762	0.0141232	-0.225054	4.66132	0.497878	1
Solyc03g093520	SL3.0ch03	56296467	56298467	+	1499	228	1328	254	86.798	83.944	-2.85354	0.037268	0.0354254	4.27247	0.913779	1
Solyc03g093625	SL3.0ch03	56585232	56587232	-	31	82	0	35	27.434	0	-27.4336	0.000374676	0.176845	0.090652	0.813865	1
Solyc03g093680	SL3.0ch03	56743317	56745317	+	1381	574	1152	561	70.639	67.25	-3.38895	0.0491948	0.190785	5.86771	0.508818	1
Solyc03g093700	SL3.0ch03	56759828	56761828	-	904	252	885	325	78.201	73.14	-5.0602	0.0110469	-0.92514	0.509862	0.259373	1
Solyc03g093710	SL3.0ch03	56777084	56779084	-	622	64	458	129	90.671	78.024	-12.6467	4.815e-09	-0.554629	-3.45321	0.749793	1
Solyc03g093830	SL3.0ch03	56936949	56938949	+	410	588	327	622	41.082	34.457	-6.62484	0.00709784	-0.121231	5.64277	0.695583	1
Solyc03g093980	SL3.0ch03	57123265	57125265	-	529	745	394	742	41.523	34.683	-6.83966	0.00186222	0.534966	-2.81807	0.845208	1
Solyc03g094000	SL3.0ch03	57143610	57145610	-	138	9	116	27	93.878	81.119	-12.7587	0.00338223	0	-3.44456	1	1
Solyc03g094060	SL3.0ch03	57203497	57205497	-	289	7	276	24	97.635	92	-5.63514	0.0067365	-0.49251	1.61085	0.350766	1
Solyc03g094080	SL3.0ch03	57225982	57227982	-	322	41	235	59	88.705	79.932	-8.77326	0.00576687	0.278075	6.54408	0.310405	1
Solyc03g094090	SL3.0ch03	57232624	57234624	-	2332	160	1964	181	93.579	91.562	-2.01768	0.0197376	0.502562	5.42186	0.0886034	1
Solyc03g094140	SL3.0ch03	57389006	57391006	+	973	141	757	234	87.343	76.387	-10.9554	8.55815e-10	0	-3.91086	1	1
Solyc03g094150	SL3.0ch03	57429529	57431529	+	1191	115	927	122	91.194	88.37	-2.82461	0.0469784	0	-3.86959	1	1
Solyc03g094160	SL3.0ch03	57487367	57489367	+	2117	596	1658	694	78.032	70.493	-7.5385	1.1218e-08	0.0635175	6.35412	0.89316	1
Solyc03g095260	SL3.0ch03	57674227	57676227	-	2971	211	2241	217	93.369	91.172	-2.19727	0.00610011	0.21508	4.94985	0.408542	1
Solyc03g095300	SL3.0ch03	57752023	57754023	-	554	295	324	275	65.253	54.09	-11.1631	9.96249e-05	0.266112	0.0466625	0.683717	1
Solyc03g095350	SL3.0ch03	57802482	57804482	+	976	294	856	325	76.85	72.481	-4.36945	0.026745	-4.27167	-3.16511	0.116865	1
Solyc03g095510	SL3.0ch03	58055145	58057145	-	1751	440	1616	503	79.918	76.262	-3.65546	0.00973555	0.772956	3.367	0.0605842	1
Solyc03g095615	SL3.0ch03	58220279	58222279	-	57	82	29	90	41.007	24.37	-16.6374	0.012447	0	-3.91086	1	1
Solyc03g095810	SL3.0ch03	58880655	58882655	-	409	263	258	284	60.863	47.601	-13.2616	2.58294e-05	0	-3.91086	1	1
Solyc03g095840	SL3.0ch03	58954218	58956218	+	1238	250	1006	338	83.199	74.851	-8.34773	4.5682e-07	0.0739546	6.44429	0.791371	1
Solyc03g095880	SL3.0ch03	58987676	58989676	-	5000	344	3618	312	93.563	92.061	-1.50181	0.0135921	4.03549	2.12987	0.102479	1
Solyc03g096030	SL3.0ch03	59271049	59273049	-	727	202	660	236	78.256	73.661	-4.59548	0.0431238	-1.11169	-3.66184	0.58669	1
Solyc03g096050	SL3.0ch03	59295433	59297433	+	503	371	430	398	57.551	51.932	-5.61912	0.0394568	2.0955	0.788362	0.0682012	1
Solyc03g096110	SL3.0ch03	59411889	59413889	-	271	18	310	45	93.772	87.324	-6.44768	0.0160164	0	-3.91086	1	1
Solyc03g096220	SL3.0ch03	59584471	59586471	+	1484	502	1402	658	74.723	68.058	-6.66481	1.864e-05	0.309552	3.8793	0.465105	1
Solyc03g096260	SL3.0ch03	59666493	59668493	+	555	90	309	101	86.047	75.366	-10.6807	8.9251e-05	-0.963443	-0.816014	0.315779	1
Solyc03g096550	SL3.0ch03	60134896	60136896	+	612	171	471	213	78.161	68.86	-9.30127	0.000276611	0.629197	3.30201	0.733762	1
Solyc03g096620	SL3.0ch03	60265753	60267753	+	847	59	559	69	93.488	89.013	-4.47512	0.00659633	0.773612	-2.79551	0.72324	1
Solyc03g096630	SL3.0ch03	60279184	60281184	+	858	466	657	443	64.804	59.727	-5.07635	0.0232107	-1.27644	-3.01988	0.546465	1
Solyc03g096770	SL3.0ch03	60549794	60551794	-	705	520	499	494	57.551	50.252	-7.29926	0.00194997	-0.342561	1.58464	0.771745	1
Solyc03g096800	SL3.0ch03	60584542	60586542	+	610	276	462	313	68.849	59.613	-9.23586	0.000381354	-0.269839	2.58085	0.659805	1
Solyc03g096840	SL3.0ch03	60646573	60648573	-	574	1127	467	1155	33.745	28.792	-4.95324	0.00574011	-0.229728	8.38513	0.545413	1
Solyc03g096870	SL3.0ch03	60675637	60677637	-	295	625	123	472	32.065	20.672	-11.3929	6.70715e-06	-1.75027	-0.451433	0.0954491	1
Solyc03g096890	SL3.0ch03	60698041	60700041	-	179	203	119	215	46.859	35.629	-11.2299	0.0063008	-0.109543	0.990146	0.88834	1
Solyc03g096910	SL3.0ch03	60717165	60719165	-	836	363	727	420	69.725	63.383	-6.34203	0.00345743	0.0253839	5.61629	0.929489	1
Solyc03g096920	SL3.0ch03	60734148	60736148	-	2827	324	2058	301	89.718	87.24	-2.47719	0.0108147	0.17855	7.00718	0.493891	1
Solyc03g096935	SL3.0ch03	60752806	60754806	-	1364	544	1295	756	71.488	63.14	-8.34854	2.08028e-07	0.317896	4.52951	0.328355	1
Solyc03g096965	SL3.0ch03	60773395	60775395	+	1248	757	1025	809	62.244	55.889	-6.35562	0.000293989	0.688979	1.17664	0.258648	1
Solyc03g097000	SL3.0ch03	60790926	60792926	+	420	29	349	71	93.541	83.095	-10.446	8.43527e-06	-0.125816	4.3577	0.669329	1
Solyc03g097110	SL3.0ch03	60885757	60887757	-	696	344	590	450	66.923	56.731	-10.1923	1.29952e-05	0.220643	6.30061	0.439772	1
Solyc03g097190	SL3.0ch03	60943639	60945639	-	1071	231	1103	376	82.258	74.577	-7.68065	6.87772e-06	-0.153814	6.25913	0.607035	1
Solyc03g097310	SL3.0ch03	61069162	61071162	+	1074	224	1344	352	82.743	79.245	-3.4974	0.0321548	0.481104	4.47862	0.133366	1
Solyc03g097330	SL3.0ch03	61081400	61083400	-	81	362	88	614	18.284	12.536	-5.74881	0.0174106	-0.708531	-2.0934	0.711266	1
Solyc03g097340	SL3.0ch03	61080470	61082470	+	439	454	412	604	49.16	40.551	-8.60895	0.000690175	0.321028	5.10803	0.330294	1
Solyc03g097355	SL3.0ch03	61105244	61107244	-	2090	301	1845	346	87.411	84.208	-3.203	0.00522397	0.265155	4.10909	0.680912	1
Solyc03g097410	SL3.0ch03	61170846	61172846	+	261	344	188	334	43.14	36.015	-7.12517	0.0325871	1.22274	2.29814	0.289261	1
Solyc03g097430	SL3.0ch03	61185732	61187732	+	1294	375	1171	436	77.531	72.869	-4.66276	0.005576	-0.217945	1.53639	0.714964	1
Solyc03g097440	SL3.0ch03	61195480	61197480	+	742	586	677	661	55.873	50.598	-5.27559	0.0147138	-1.35624	7.2976	0.00494135	0.314488
Solyc03g097450	SL3.0ch03	61217787	61219787	-	1256	106	1090	153	92.217	87.691	-4.52626	0.000533783	0.126287	3.42598	0.726715	1
Solyc03g097550	SL3.0ch03	61309672	61311672	+	808	835	405	916	49.178	30.659	-18.5197	8.4907e-23	0.0634208	5.19505	0.804747	1
Solyc03g097585	SL3.0ch03	61388027	61390027	-	523	929	369	862	36.019	29.976	-6.04365	0.00297373	0	-3.91086	1	1
Solyc03g097600	SL3.0ch03	61372502	61374502	-	348	337	240	333	50.803	41.885	-8.9181	0.00492071	4.07363	-1.53252	0.0723292	1
Solyc03g097620	SL3.0ch03	61388027	61390027	-	523	929	369	862	36.019	29.976	-6.04365	0.00297373	0	-3.91086	1	1
Solyc03g097770	SL3.0ch03	61543488	61545488	-	80	50	2	30	61.538	6.25	-55.2885	4.86455e-08	-1.4808	-1.05228	0.11563	1
Solyc03g097800	SL3.0ch03	61549825	61551825	+	323	323	304	407	50	42.757	-7.24332	0.0165959	-0.230217	7.13513	0.457801	1
Solyc03g097882	SL3.0ch03	61660901	61662901	-	1640	242	1501	283	87.141	84.137	-3.00457	0.0199317	0	-3.91086	1	1
Solyc03g097940	SL3.0ch03	61753770	61755770	+	162	1119	85	1053	12.646	7.469	-5.17713	0.000133114	-0.13371	2.88269	0.760711	1
Solyc03g098060	SL3.0ch03	61840885	61842885	-	257	691	84	762	27.11	9.929	-17.1806	1.82993e-19	0	-3.91086	1	1
Solyc03g098170	SL3.0ch03	61942937	61944937	-	1415	359	1166	394	79.763	74.744	-5.01966	0.00183631	0.33311	5.58982	0.243602	1
Solyc03g098200	SL3.0ch03	61981616	61983616	-	615	611	534	725	50.163	42.415	-7.74852	0.000449751	-1.38145	-2.12684	0.389236	1
Solyc03g098210	SL3.0ch03	62008212	62010212	-	150	436	74	489	25.597	13.144	-12.4534	8.39956e-07	0.304357	5.26879	0.384334	1
Solyc03g098220	SL3.0ch03	62015628	62017628	-	499	1048	316	975	32.256	24.477	-7.77883	3.11004e-05	0.195739	6.83991	0.480768	1
Solyc03g098290	SL3.0ch03	62068411	62070411	+	68	24	86	60	73.913	58.904	-15.0089	0.0445204	0.894883	5.74354	0.0970182	1
Solyc03g098410	SL3.0ch03	62163567	62165567	-	99	76	14	97	56.571	12.613	-43.9588	4.86516e-13	0	-3.91086	1	1
Solyc03g098470	SL3.0ch03	62193910	62195910	-	650	370	440	426	63.725	50.808	-12.9172	1.76325e-07	-0.128378	5.60022	0.694361	1
Solyc03g098490	SL3.0ch03	62206120	62208120	-	859	594	661	672	59.119	49.587	-9.53167	3.49838e-06	-1.7232	-2.68191	0.255029	1
Solyc03g098500	SL3.0ch03	62221379	62223379	-	343	765	256	755	30.957	25.321	-5.63521	0.0104102	0	-3.91086	1	1
Solyc03g098560	SL3.0ch03	62316867	62318867	+	769	198	655	243	79.524	72.94	-6.58444	0.00265703	-0.187201	-0.34688	0.895492	1
Solyc03g098570	SL3.0ch03	62319296	62321296	+	122	103	103	168	54.222	38.007	-16.2148	0.00135396	1.95945	-2.6863	0.481044	1
Solyc03g098600	SL3.0ch03	62341284	62343284	-	11	0	2	50	100	3.846	-96.1538	1.72797e-09	0.0659439	6.86707	0.809217	1
Solyc03g098610	SL3.0ch03	62350853	62352853	-	468	310	283	271	60.154	51.083	-9.07121	0.0033408	-0.423621	3.6151	0.23335	1
Solyc03g098630	SL3.0ch03	62374985	62376985	-	1500	228	1225	244	86.806	83.39	-3.41549	0.0153018	-0.0407606	3.8945	0.914193	1
Solyc03g019910	SL3.0ch03	62756240	62758240	-	117	562	56	509	17.231	9.912	-7.31972	0.000748448	0.00755652	4.34883	0.981499	1
Solyc03g019890	SL3.0ch03	62776312	62778312	-	786	1024	525	892	43.425	37.05	-6.37531	0.000943256	-0.437069	2.31469	0.567116	1
Solyc03g019870	SL3.0ch03	62785877	62787877	+	482	597	275	582	44.671	32.089	-12.5823	1.66122e-07	3.84985	-3.36138	0.257679	1
Solyc03g019860	SL3.0ch03	62790995	62792995	+	147	714	69	668	17.073	9.362	-7.71089	3.77426e-05	1.72134	-2.20874	0.233463	1
Solyc03g019810	SL3.0ch03	62825554	62827554	-	1421	1173	1002	1009	54.78	49.826	-4.9543	0.00261948	-0.203845	3.66409	0.588293	1
Solyc03g019800	SL3.0ch03	62825196	62827196	+	1427	1397	1007	1290	50.531	43.84	-6.69137	1.23309e-05	0.270598	4.05488	0.397246	1
Solyc03g019790	SL3.0ch03	62833528	62835528	+	418	710	357	784	37.057	31.288	-5.76839	0.00967629	-0.352204	3.79389	0.568833	1
Solyc03g019780	SL3.0ch03	62841254	62843254	+	973	437	1067	590	69.007	64.393	-4.61361	0.0158579	-0.0569084	8.97304	0.862054	1
Solyc03g019700	SL3.0ch03	62912160	62914160	-	825	626	636	653	56.857	49.341	-7.51677	0.000373076	0.289742	4.9541	0.414643	1
Solyc03g019675	SL3.0ch03	62939262	62941262	-	1408	375	1245	422	78.968	74.685	-4.28297	0.00791379	4.14394	-3.45715	0.340663	1
Solyc03g019650	SL3.0ch03	62942213	62944213	+	229	1001	187	1130	18.618	14.199	-4.41895	0.00685879	-0.551798	6.72372	0.101507	1
Solyc03g019640	SL3.0ch03	62947956	62949956	+	305	252	250	301	54.758	45.372	-9.38558	0.00576191	-1.10432	-2.28887	0.579265	1
Solyc03g110840	SL3.0ch03	63065739	63067739	+	1321	123	1227	218	91.482	84.913	-6.5685	4.35409e-07	0	-3.91086	1	1
Solyc03g110870	SL3.0ch03	63084805	63086805	-	39	311	12	306	11.143	3.774	-7.36927	0.00127913	0.143318	5.52945	0.673384	1
Solyc03g110950	SL3.0ch03	63156946	63158946	+	1354	259	1236	311	83.943	79.897	-4.04639	0.00867869	0	-3.91086	1	1
Solyc03g110990	SL3.0ch03	63175021	63177021	-	950	670	677	571	58.642	54.247	-4.39518	0.0371381	-0.907053	-3.07215	0.609947	1
Solyc03g111030	SL3.0ch03	63194368	63196368	+	89	15	53	22	85.577	70.667	-14.9103	0.042219	0.42305	0.603193	0.61113	1
Solyc03g111090	SL3.0ch03	63237887	63239887	-	131	391	83	512	25.096	13.95	-11.1462	1.78725e-05	0.370202	-1.19338	0.674695	1
Solyc03g111130	SL3.0ch03	63282576	63284576	-	12	123	1	143	8.889	0.694	-8.19444	0.00319927	0.467247	-0.66763	0.546967	1
Solyc03g111210	SL3.0ch03	63337802	63339802	-	641	92	626	139	87.449	81.83	-5.61878	0.00682845	-0.233171	1.86078	0.609038	1
Solyc03g111215	SL3.0ch03	63337802	63339802	-	641	92	626	139	87.449	81.83	-5.61878	0.00682845	0	-3.91086	1	1
Solyc03g111250	SL3.0ch03	63345740	63347740	+	1728	335	1281	306	83.762	80.718	-3.04318	0.0333449	-0.0250858	4.9634	0.937174	1
Solyc03g111330	SL3.0ch03	63422624	63424624	+	862	675	822	756	56.083	52.091	-3.99202	0.0449748	-0.0124802	4.81861	0.968189	1
Solyc03g111340	SL3.0ch03	63427180	63429180	+	61	115	14	91	34.659	13.333	-21.3258	0.000341084	0.166486	5.31888	0.547989	1
Solyc03g111370	SL3.0ch03	63448648	63450648	-	223	310	58	394	41.839	12.832	-29.0068	4.01891e-23	0.176372	5.07378	0.54424	1
Solyc03g111385	SL3.0ch03	63458294	63460294	+	1437	363	1269	414	79.833	75.401	-4.43226	0.00473869	0.605575	-2.70064	0.797682	1
Solyc03g111390	SL3.0ch03	63458294	63460294	+	1437	363	1269	414	79.833	75.401	-4.43226	0.00473869	-0.0557357	5.109	0.846509	1
Solyc03g111500	SL3.0ch03	63593639	63595639	-	1363	355	1222	407	79.336	75.015	-4.32109	0.00755159	0.683836	2.12077	0.175841	1
Solyc03g111520	SL3.0ch03	63609481	63611481	-	1166	493	948	649	70.283	59.361	-10.922	1.05186e-09	0	-3.91086	1	1
Solyc03g111590	SL3.0ch03	63715741	63717741	-	2582	209	2309	236	92.512	90.727	-1.78473	0.0362644	0.0481454	5.17826	0.895093	1
Solyc03g111600	SL3.0ch03	63729779	63731779	-	972	794	807	907	55.04	47.083	-7.95679	1.71494e-05	0.0367863	1.92242	0.949511	1
Solyc03g111640	SL3.0ch03	63759252	63761252	-	2131	465	908	449	82.088	66.912	-15.1755	2.59568e-24	0.416524	7.439	0.19294	1
Solyc03g111665	SL3.0ch03	63796276	63798276	-	54	217	31	222	19.926	12.253	-7.67323	0.0336621	-0.627494	-1.09238	0.590309	1
Solyc03g111690	SL3.0ch03	63825403	63827403	+	348	260	304	298	57.237	50.498	-6.7385	0.0380336	2.66327	10.2999	5.06836e-06	0.00169425
Solyc03g111760	SL3.0ch03	63883757	63885757	-	194	70	11	13	73.485	45.833	-27.6515	0.0173464	-1.28739	-1.64731	0.260946	1
Solyc03g111840	SL3.0ch03	63937199	63939199	-	1261	223	1331	302	84.973	81.506	-3.46662	0.0225629	-0.34538	5.81028	0.257394	1
Solyc03g111887	SL3.0ch03	63974764	63976764	-	1602	462	1129	434	77.616	72.233	-5.38339	0.000802879	0.0439541	-0.65304	0.981954	1
Solyc03g111935	SL3.0ch03	63992859	63994859	+	1073	337	921	432	76.099	68.071	-8.02834	1.75627e-05	-0.732797	2.12436	0.23137	1
Solyc03g111990	SL3.0ch03	64038146	64040146	-	1436	212	1295	242	87.136	84.255	-2.88088	0.040041	0.21683	2.11273	0.780625	1
Solyc03g112040	SL3.0ch03	64064347	64066347	+	609	331	472	339	64.787	58.2	-6.58748	0.0115573	4.61892	3.02846	0.0239055	0.731475
Solyc03g112140	SL3.0ch03	64119151	64121151	+	346	580	203	738	37.365	21.573	-15.7922	1.31983e-12	-0.269011	3.50607	0.414989	1
Solyc03g112150	SL3.0ch03	64127645	64129645	+	93	145	18	154	39.076	10.465	-28.6105	4.57425e-10	-0.316952	6.20708	0.312903	1
Solyc03g112180	SL3.0ch03	64157613	64159613	+	1433	347	1084	341	80.506	76.07	-4.43544	0.00639746	0	-3.56289	1	1
Solyc03g112190	SL3.0ch03	64161112	64163112	+	543	238	130	143	69.526	47.619	-21.9072	2.88224e-09	0.354322	1.97035	0.46516	1
Solyc03g112230	SL3.0ch03	64183247	64185247	-	1563	667	1346	758	70.09	63.973	-6.1163	9.56236e-05	0.2573	9.56669	0.413105	1
Solyc03g112320	SL3.0ch03	64243128	64245128	-	82	158	60	187	34.167	24.291	-9.87517	0.0321991	0.432883	0.838581	0.5118	1
Solyc03g112350	SL3.0ch03	64256762	64258762	+	856	496	605	441	63.314	57.839	-5.47422	0.0153018	0.764919	3.33402	0.146073	1
Solyc03g112580	SL3.0ch03	64449256	64451256	+	113	504	65	483	18.314	11.861	-6.45311	0.00647997	-0.114657	2.4105	0.875233	1
Solyc03g112620	SL3.0ch03	64486497	64488497	-	1797	775	1473	801	69.868	64.776	-5.09208	0.000668189	-0.631711	4.63238	0.312289	1
Solyc03g112650	SL3.0ch03	64505268	64507268	+	80	46	27	44	63.492	38.028	-25.4639	0.00203128	-0.0343632	5.40288	0.906175	1
Solyc03g112680	SL3.0ch03	64535330	64537330	+	598	170	495	265	77.865	65.132	-12.733	3.16675e-07	0	-3.19044	1	1
Solyc03g112720	SL3.0ch03	64549187	64551187	+	1026	914	782	826	52.887	48.632	-4.25476	0.0250219	-0.38772	2.04097	0.450263	1
Solyc03g112755	SL3.0ch03	64573761	64575761	+	71	4	0	10	94.667	0	-94.6667	4.07336e-09	-4.02395	-1.57903	0.00354763	0.254802
Solyc03g112800	SL3.0ch03	64607525	64609525	+	54	114	0	24	32.143	0	-32.1429	0.00126046	0	-3.87283	1	1
Solyc03g112820	SL3.0ch03	64619785	64621785	-	410	200	362	344	67.213	51.275	-15.9383	5.14514e-08	0.545142	2.69836	0.261201	1
Solyc03g112910	SL3.0ch03	64671314	64673314	+	44	283	4	226	13.456	1.739	-11.7165	2.30567e-06	0.133865	5.98281	0.622802	1
Solyc03g112990	SL3.0ch03	64775737	64777737	+	84	209	40	326	28.669	10.929	-17.74	1.15843e-07	-0.173139	4.34609	0.592341	1
Solyc03g112995	SL3.0ch03	64781877	64783877	-	1488	439	1020	512	77.218	66.58	-10.6388	7.59104e-11	0	-3.91086	1	1
Solyc03g113000	SL3.0ch03	64793984	64795984	-	531	165	555	294	76.293	65.371	-10.9221	1.94814e-05	-0.095197	5.25527	0.729025	1
Solyc03g113010	SL3.0ch03	64799830	64801830	-	589	833	593	1259	41.421	32.019	-9.4011	3.15979e-07	0.242922	5.61255	0.445098	1
Solyc03g113060	SL3.0ch03	64844286	64846286	-	754	630	483	744	54.48	39.364	-15.1155	2.71039e-13	-0.54229	5.02279	0.0808242	1
Solyc03g113070	SL3.0ch03	64848814	64850814	+	643	860	444	871	42.781	33.764	-9.01685	6.6972e-06	0.240295	1.5832	0.713339	1
Solyc03g113100	SL3.0ch03	64868216	64870216	-	1489	532	1185	648	73.676	64.648	-9.02828	1.57105e-08	0.143029	8.19052	0.631587	1
Solyc03g113160	SL3.0ch03	64898287	64900287	-	292	254	265	309	53.48	46.167	-7.31261	0.0317263	2.65318	-3.50571	0.592965	1
Solyc03g113170	SL3.0ch03	64898301	64900301	+	292	254	265	309	53.48	46.167	-7.31261	0.0317263	-2.27876	-3.3395	0.364596	1
Solyc03g113280	SL3.0ch03	64953332	64955332	-	1981	1057	1666	1021	65.207	62.002	-3.20514	0.0244789	-0.814409	3.7349	0.274892	1
Solyc03g113360	SL3.0ch03	64994772	64996772	-	539	548	440	544	49.586	44.715	-4.87057	0.0473469	0	-3.91086	1	1
Solyc03g113390	SL3.0ch03	65022153	65024153	+	245	354	111	348	40.902	24.183	-16.7185	1.00411e-07	0.743814	6.92844	0.047328	0.988801
Solyc03g113420	SL3.0ch03	65052890	65054890	-	415	414	260	354	50.06	42.345	-7.71504	0.0095855	1.16213	2.9338	0.196809	1
Solyc03g113590	SL3.0ch03	65159555	65161555	-	2436	996	1666	792	70.979	67.779	-3.20034	0.0189077	-0.00665607	5.77733	0.980332	1
Solyc03g113620	SL3.0ch03	65176086	65178086	-	1190	578	849	646	67.308	56.789	-10.5184	8.15283e-09	-0.416007	7.27211	0.471437	1
Solyc03g113660	SL3.0ch03	65213818	65215818	+	709	827	604	830	46.159	42.12	-4.03891	0.0494244	0.550464	4.70632	0.0919249	1
Solyc03g113770	SL3.0ch03	65311196	65313196	-	68	121	1	64	35.979	1.538	-34.4404	1.40416e-08	0.0859043	5.27901	0.777799	1
Solyc03g113790	SL3.0ch03	65324683	65326683	-	38	485	8	446	7.266	1.762	-5.50366	0.000145685	-0.346933	5.36425	0.223745	1
Solyc03g113850	SL3.0ch03	65391565	65393565	+	273	166	218	228	62.187	48.879	-13.3079	0.000353519	0	-3.91086	1	1
Solyc03g113970	SL3.0ch03	65508145	65510145	+	1352	1057	1119	1036	56.123	51.926	-4.19712	0.0110559	0.00773688	0.459695	1	1
Solyc03g113990	SL3.0ch03	65528081	65530081	-	888	201	656	240	81.543	73.214	-8.32841	5.66496e-05	-0.398285	3.69858	0.396768	1
Solyc03g114030	SL3.0ch03	65560964	65562964	-	171	696	131	728	19.723	15.25	-4.47289	0.0305247	-0.412158	6.44176	0.335004	1
Solyc03g114120	SL3.0ch03	65628465	65630465	+	2055	223	1813	254	90.211	87.712	-2.49905	0.0185132	-0.0398101	4.59983	0.903003	1
Solyc03g114140	SL3.0ch03	65642409	65644409	-	1156	585	979	617	66.399	61.341	-5.05777	0.00636225	0.203296	6.01008	0.496319	1
Solyc03g114490	SL3.0ch03	65956858	65958858	-	540	629	420	612	46.193	40.698	-5.49565	0.0204169	0	-3.87342	1	1
Solyc03g114510	SL3.0ch03	65979149	65981149	-	2163	304	2049	362	87.677	84.985	-2.69186	0.0148872	0.376267	-1.67662	0.701923	1
Solyc03g114540	SL3.0ch03	65992884	65994884	-	290	299	237	326	49.236	42.096	-7.14008	0.0295611	2.47223	-2.27768	0.233455	1
Solyc03g114580	SL3.0ch03	66017625	66019625	-	1638	837	1279	980	66.182	56.618	-9.56385	2.4503e-10	-0.138149	5.19163	0.700555	1
Solyc03g114590	SL3.0ch03	66017604	66019604	+	1638	837	1279	980	66.182	56.618	-9.56385	2.4503e-10	0.400396	1.09362	0.446175	1
Solyc03g114593	SL3.0ch03	66017628	66019628	+	1638	837	1279	980	66.182	56.618	-9.56385	2.4503e-10	0	-3.91086	1	1
Solyc03g114750	SL3.0ch03	66141613	66143613	-	427	321	467	550	57.086	45.919	-11.1662	2.18508e-05	0.381555	5.30262	0.573649	1
Solyc03g114770	SL3.0ch03	66148466	66150466	-	2203	461	1682	629	82.695	72.782	-9.91285	1.11918e-15	-1.91147	-3.83452	1	1
Solyc03g114780	SL3.0ch03	66149466	66151466	+	2833	476	2247	463	85.615	82.915	-2.69986	0.0102503	0.0492878	3.58987	0.897982	1
Solyc03g114800	SL3.0ch03	66172231	66174231	-	266	61	250	97	81.346	72.046	-9.29946	0.0112177	-0.751811	0.683933	0.424591	1
Solyc03g114820	SL3.0ch03	66180939	66182939	-	107	330	74	361	24.485	17.011	-7.47363	0.0163175	0.0590153	-0.221494	0.975746	1
Solyc03g114890	SL3.0ch03	66252681	66254681	+	1202	531	945	618	69.359	60.461	-8.89884	7.43023e-07	0	-3.91086	1	1
Solyc03g114960	SL3.0ch03	66293927	66295927	+	2886	1013	2800	1237	74.019	69.358	-4.66054	2.61973e-05	0.823554	5.22951	0.0770132	1
Solyc03g114970	SL3.0ch03	66320228	66322228	-	1743	560	1731	717	75.684	70.711	-4.97311	0.00044875	0.228321	6.74945	0.596002	1
Solyc03g114980	SL3.0ch03	66319826	66321826	+	1778	579	1741	754	75.435	69.78	-5.65532	5.52136e-05	0.0276039	4.45523	0.929713	1
Solyc03g115005	SL3.0ch03	66340732	66342732	+	395	385	331	472	50.641	41.22	-9.4206	0.000701844	-0.979645	-2.29124	0.499127	1
Solyc03g115010	SL3.0ch03	66352039	66354039	-	1133	262	740	327	81.219	69.353	-11.8653	1.70738e-10	0	-3.91086	1	1
Solyc03g115025	SL3.0ch03	66362232	66364232	+	178	398	109	455	30.903	19.326	-11.5765	3.64121e-05	2.66119	-3.00222	0.191177	1
Solyc03g115030	SL3.0ch03	66362232	66364232	+	178	398	109	455	30.903	19.326	-11.5765	3.64121e-05	-0.432338	2.00091	0.448218	1
Solyc03g115050	SL3.0ch03	66372359	66374359	-	1388	212	1303	332	86.75	79.694	-7.05581	6.52229e-07	-0.254977	2.72624	0.770473	1
Solyc03g115090	SL3.0ch03	66389734	66391734	-	546	530	434	524	50.743	45.303	-5.44078	0.0281804	0	-3.91086	1	1
Solyc03g115170	SL3.0ch03	66454151	66456151	-	363	63	251	79	85.211	76.061	-9.15066	0.00510917	0.0529829	-2.70259	1	1
Solyc03g115240	SL3.0ch03	66510179	66512179	-	215	6	201	24	97.285	89.333	-7.95173	0.00296371	-0.132587	4.32684	0.670922	1
Solyc03g115255	SL3.0ch03	66539760	66541760	+	183	6	73	21	96.825	77.66	-19.1658	5.27965e-06	0.67314	0.0282066	0.365402	1
Solyc03g115290	SL3.0ch03	66550011	66552011	+	194	172	62	119	53.005	34.254	-18.7513	0.000180606	0.945813	-1.75086	0.444426	1
Solyc03g115320	SL3.0ch03	66560642	66562642	-	1098	259	1095	386	80.914	73.937	-6.97725	5.71996e-05	-1.6869	-2.38516	0.207728	1
Solyc03g115330	SL3.0ch03	66561585	66563585	+	2138	103	1934	244	95.404	88.797	-6.60678	5.11813e-15	-0.0795266	2.60933	0.840099	1
Solyc03g115450	SL3.0ch03	66638016	66640016	+	654	327	551	362	66.667	60.35	-6.31617	0.0112283	-0.895459	-0.992444	0.175746	1
Solyc03g115470	SL3.0ch03	66646460	66648460	+	180	744	101	718	19.481	12.332	-7.14841	0.000222143	-0.205881	4.76287	0.485259	1
Solyc03g115480	SL3.0ch03	66654821	66656821	-	408	138	383	224	74.725	63.097	-11.6281	0.000125758	0	-3.91086	1	1
Solyc03g115640	SL3.0ch03	66765537	66767537	+	50	207	26	195	19.455	11.765	-7.69055	0.0423891	-0.758124	3.77661	0.0682645	1
Solyc03g115700	SL3.0ch03	66822353	66824353	+	940	444	813	526	67.919	60.717	-7.20212	0.000362856	0.0384128	6.94342	0.888525	1
Solyc03g115710	SL3.0ch03	66832039	66834039	-	193	129	152	153	59.938	49.836	-10.1018	0.0253464	0	-3.91086	1	1
Solyc03g115730	SL3.0ch03	66845004	66847004	+	1139	346	1012	393	76.7	72.028	-4.67187	0.010195	-0.167045	3.16021	0.681938	1
Solyc03g115780	SL3.0ch03	66876301	66878301	-	80	122	79	204	39.604	27.915	-11.6888	0.0173447	0.430605	0.838805	0.626562	1
Solyc03g115810	SL3.0ch03	66880542	66882542	+	849	276	811	360	75.467	69.257	-6.20962	0.0027833	0.145047	4.60136	0.690855	1
Solyc03g115890	SL3.0ch03	66969755	66971755	+	210	212	187	261	49.763	41.741	-8.02196	0.0373465	0.222326	0.618751	0.805196	1
Solyc03g116010	SL3.0ch03	67032454	67034454	-	99	215	32	246	31.529	11.511	-20.0179	3.35451e-08	0	-3.91086	1	1
Solyc03g116020	SL3.0ch03	67035602	67037602	-	878	108	687	136	89.047	83.475	-5.57156	0.00215208	-0.0414885	5.83533	0.899796	1
Solyc03g116225	SL3.0ch03	67200554	67202554	+	412	679	210	561	37.764	27.237	-10.5262	1.29952e-05	-0.217869	9.57061	0.652396	1
Solyc03g116243	SL3.0ch03	67225091	67227091	-	606	23	431	39	96.343	91.702	-4.64127	0.00385732	0	-3.91086	1	1
Solyc03g116290	SL3.0ch03	67251085	67253085	+	48	85	29	96	36.09	23.2	-12.8902	0.0495984	0.0814166	-3.79985	1	1
Solyc03g116530	SL3.0ch03	67398567	67400567	-	277	571	184	594	32.665	23.65	-9.01471	0.000249588	-0.423206	4.65671	0.194784	1
Solyc03g116580	SL3.0ch03	67424207	67426207	-	38	324	1	170	10.497	0.585	-9.91244	2.25001e-05	-0.525131	-2.43586	1	1
Solyc03g116590	SL3.0ch03	67424207	67426207	-	38	324	1	170	10.497	0.585	-9.91244	2.25001e-05	-0.262088	2.12704	0.592422	1
Solyc03g116620	SL3.0ch03	67441696	67443696	+	634	325	566	359	66.111	61.189	-4.92134	0.0472649	-1.81335	-3.79656	1	1
Solyc03g116730	SL3.0ch03	67505043	67507043	-	1573	562	1234	517	73.677	70.474	-3.2028	0.0480308	-1.35643	1.1421	0.0840263	1
Solyc03g116860	SL3.0ch03	67604681	67606681	-	524	328	332	271	61.502	55.058	-6.4443	0.0288737	0	-3.31757	1	1
Solyc03g116890	SL3.0ch03	67626540	67628540	-	595	556	407	525	51.694	43.67	-8.02465	0.00104828	0.148797	6.96075	0.841665	1
Solyc03g116975	SL3.0ch03	67735083	67737083	-	885	330	0	111	72.84	0	-72.8395	5.62664e-56	3.49844	-3.72725	0.268257	1
Solyc03g117010	SL3.0ch03	67767402	67769402	-	1406	258	772	260	84.495	74.806	-9.68899	1.17748e-08	-0.289343	4.67167	0.318857	1
Solyc03g117020	SL3.0ch03	67769911	67771911	+	396	291	260	265	57.642	49.524	-8.11811	0.0121328	0.388578	6.22148	0.138977	1
Solyc03g117050	SL3.0ch03	67797259	67799259	+	680	104	451	143	86.735	75.926	-10.8088	2.14932e-06	-0.194633	-0.857109	0.89542	1
Solyc03g117055	SL3.0ch03	67804751	67806751	-	25	33	18	60	43.103	23.077	-20.0265	0.030172	0	-3.91086	1	1
Solyc03g117060	SL3.0ch03	67809702	67811702	-	1188	787	980	795	60.152	55.211	-4.94063	0.00609616	0.000960755	6.11508	0.997677	1
Solyc03g117160	SL3.0ch03	67875242	67877242	-	35	0	41	28	100	59.42	-40.5797	7.19104e-06	0	-3.91086	1	1
Solyc03g117200	SL3.0ch03	67886276	67888276	+	376	530	112	402	41.501	21.79	-19.7112	6.00798e-13	-0.207379	4.36355	0.498535	1
Solyc03g117220	SL3.0ch03	67904217	67906217	-	922	390	460	332	70.274	58.081	-12.1936	1.51553e-07	0	-3.82946	1	1
Solyc03g117230	SL3.0ch03	67912713	67914713	-	326	876	157	595	27.121	20.878	-6.2438	0.00487896	1.80478	-3.13751	1	1
Solyc03g117245	SL3.0ch03	67920586	67922586	-	99	680	35	424	12.709	7.625	-5.08333	0.0133327	0	-3.91086	1	1
Solyc03g117350	SL3.0ch03	67981501	67983501	-	872	972	658	923	47.289	41.619	-5.66927	0.0028059	-0.0972708	3.6189	0.79047	1
Solyc03g117370	SL3.0ch03	68013748	68015748	+	43	96	12	64	30.935	15.789	-15.1458	0.0287391	-0.00743439	2.89307	0.986647	1
Solyc03g117380	SL3.0ch03	68021891	68023891	+	101	119	27	118	45.909	18.621	-27.2884	5.11284e-07	0.0188178	2.55457	0.970327	1
Solyc03g117480	SL3.0ch03	68113304	68115304	-	542	1124	431	1085	32.533	28.43	-4.10293	0.0246375	0.00265984	7.91002	0.993792	1
Solyc03g117600	SL3.0ch03	68197926	68199926	+	470	1471	145	989	24.214	12.787	-11.4277	1.36482e-13	-0.428913	2.96895	0.384441	1
Solyc03g117640	SL3.0ch03	68215185	68217185	-	2045	741	675	497	73.403	57.594	-15.8089	2.01414e-20	0.325491	2.00228	0.570603	1
Solyc03g117650	SL3.0ch03	68216613	68218613	+	1316	396	341	183	76.869	65.076	-11.7928	1.12904e-06	0.0658689	3.92019	0.834772	1
Solyc03g117680	SL3.0ch03	68235009	68237009	-	85	20	49	40	80.952	55.056	-25.8962	0.00060879	-0.299861	2.36237	0.532126	1
Solyc03g117670	SL3.0ch03	68232190	68234190	+	100	266	1	114	27.322	0.87	-26.4528	3.08515e-11	-0.270416	3.0027	0.524631	1
Solyc03g117675	SL3.0ch03	68238896	68240896	-	167	1021	117	990	14.057	10.569	-3.48813	0.0228486	-1.63722	5.90329	0.000159219	0.0264881
Solyc03g117740	SL3.0ch03	68268994	68270994	+	206	22	523	150	90.351	77.712	-12.6391	7.65417e-05	-0.691537	4.43746	0.0254594	0.756396
Solyc03g117860	SL3.0ch03	68363151	68365151	-	359	653	228	625	35.474	26.729	-8.74512	0.000222373	0.811401	8.01916	0.131208	1
Solyc03g117870	SL3.0ch03	68368800	68370800	-	126	731	73	679	14.702	9.707	-4.995	0.00626309	-0.677784	7.74603	0.0652711	1
Solyc03g117880	SL3.0ch03	68372649	68374649	-	806	273	657	282	74.699	69.968	-4.73074	0.0348792	0	-3.91086	1	1
Solyc03g118000	SL3.0ch03	68472635	68474635	-	83	481	10	492	14.716	1.992	-12.7243	1.81248e-13	0.331761	2.02569	0.697557	1
Solyc03g118080	SL3.0ch03	68541268	68543268	-	692	765	620	906	47.495	40.629	-6.86576	0.000637451	0	-3.91086	1	1
Solyc03g118100	SL3.0ch03	68558587	68560587	-	90	197	21	155	31.359	11.932	-19.4271	7.59497e-06	3.12806	5.10339	0.000134663	0.0237043
Solyc03g118175	SL3.0ch03	68602087	68604087	+	1080	826	721	971	56.663	42.612	-14.0509	1.2442e-15	2.26742	-2.87522	0.195157	1
Solyc03g118180	SL3.0ch03	68602087	68604087	+	1080	826	721	971	56.663	42.612	-14.0509	1.2442e-15	0.358364	3.06442	0.346818	1
Solyc03g118225	SL3.0ch03	68630000	68632000	+	1704	522	1528	551	76.55	73.497	-3.05299	0.0393523	0	-3.91086	1	1
Solyc03g118270	SL3.0ch03	68669583	68671583	+	787	392	645	464	66.751	58.161	-8.59098	0.00011013	0.241979	5.60861	0.376903	1
Solyc03g118280	SL3.0ch03	68677151	68679151	-	2325	443	2142	493	83.996	81.29	-2.70534	0.0184709	0.46751	2.66633	0.230826	1
Solyc03g118290	SL3.0ch03	68697929	68699929	+	554	485	423	578	53.321	42.258	-11.0628	4.65479e-06	0.360707	8.29169	0.424996	1
Solyc03g118330	SL3.0ch03	68723176	68725176	-	85	162	26	118	34.413	18.056	-16.3574	0.00159581	1.00939	-2.95992	0.498503	1
Solyc03g118333	SL3.0ch03	68724264	68726264	-	222	448	127	365	33.134	25.813	-7.32132	0.0170927	0.979728	-2.11638	0.539842	1
Solyc03g118337	SL3.0ch03	68724852	68726852	-	319	395	217	353	44.678	38.07	-6.6077	0.0358259	5.46881	-2.73842	0.0608083	1
Solyc03g118450	SL3.0ch03	68809196	68811196	-	371	484	153	445	43.392	25.585	-17.8065	3.89627e-11	-0.410901	2.54199	0.697413	1
Solyc03g118455	SL3.0ch03	68808506	68810506	+	376	436	178	402	46.305	30.69	-15.6158	4.00894e-08	-1.90337	-3.76085	1	1
Solyc03g118470	SL3.0ch03	68812950	68814950	+	1086	988	845	987	52.363	46.124	-6.23813	0.000422213	-0.32159	7.63966	0.571396	1
Solyc03g118510	SL3.0ch03	68835582	68837582	+	879	454	737	480	65.941	60.559	-5.38273	0.0119291	-0.0575333	4.69922	0.887111	1
Solyc03g118530	SL3.0ch03	68903334	68905334	-	503	278	327	240	64.405	57.672	-6.73265	0.0251567	0.105372	5.63699	0.740692	1
Solyc03g118587	SL3.0ch03	68945440	68947440	+	83	59	11	21	58.451	34.375	-24.0757	0.0336765	0	-3.71168	1	1
Solyc03g118750	SL3.0ch03	69062490	69064490	+	506	637	371	727	44.269	33.789	-10.4808	2.90365e-06	-0.204709	3.86135	0.690558	1
Solyc03g118790	SL3.0ch03	69095283	69097283	+	1284	881	1029	863	59.307	54.387	-4.92027	0.00458607	0.85955	1.18635	0.142121	1
Solyc03g118960	SL3.0ch03	69195029	69197029	-	200	55	228	157	78.431	59.221	-19.2106	2.70241e-06	1.1102	-1.78992	0.315516	1
Solyc03g118970	SL3.0ch03	69200063	69202063	-	1510	510	1294	540	74.752	70.556	-4.19631	0.00915037	0.385056	5.94521	0.558866	1
Solyc03g118995	SL3.0ch03	69210129	69212129	-	753	1102	623	1097	40.593	36.221	-4.37206	0.0160415	0.50375	1.49544	0.307339	1
Solyc03g119060	SL3.0ch03	69254601	69256601	+	380	1234	259	1038	23.544	19.969	-3.57483	0.0388624	-0.487093	6.23284	0.131913	1
Solyc03g119140	SL3.0ch03	69315081	69317081	+	421	705	325	708	37.389	31.462	-5.92723	0.0102882	0.0173165	4.87038	0.956657	1
Solyc03g119150	SL3.0ch03	69329333	69331333	+	51	90	7	36	36.17	16.279	-19.8911	0.0286332	-1.09768	-0.441461	0.198095	1
Solyc03g119320	SL3.0ch03	69448337	69450337	-	1113	144	959	215	88.544	81.687	-6.85761	1.21766e-05	-0.122879	1.80359	0.874627	1
Solyc03g119340	SL3.0ch03	69464726	69466726	+	469	877	350	814	34.844	30.069	-4.77525	0.0237344	-0.0118128	3.90199	0.981576	1
Solyc03g119480	SL3.0ch03	69562540	69564540	+	846	704	593	601	54.581	49.665	-4.91565	0.0224121	0.762156	3.37503	0.0490173	0.99772
Solyc03g119520	SL3.0ch03	69583904	69585904	+	2661	808	2081	840	76.708	71.243	-5.46526	4.70875e-06	-0.157434	6.08409	0.669602	1
Solyc03g119570	SL3.0ch03	69612871	69614871	+	2534	468	2186	528	84.41	80.545	-3.86507	0.000485597	-0.0877254	2.53429	0.846004	1
Solyc03g119590	SL3.0ch03	69637045	69639045	+	845	704	734	728	54.551	50.205	-4.34613	0.0331422	1.55982	2.57567	0.1602	1
Solyc03g119600	SL3.0ch03	69642150	69644150	+	549	685	425	710	44.489	37.445	-7.04453	0.00170064	0.52279	5.73241	0.277901	1
Solyc03g119630	SL3.0ch03	69671922	69673922	+	278	1185	206	1200	19.002	14.651	-4.35056	0.00532792	0.148195	0.535142	0.839957	1
Solyc03g119650	SL3.0ch03	69687467	69689467	+	1769	70	1254	73	96.194	94.499	-1.69471	0.0428321	0.200526	6.7415	0.554429	1
Solyc03g119690	SL3.0ch03	69725947	69727947	-	872	917	642	1060	48.742	37.72	-11.022	7.49401e-10	0	-3.91086	1	1
Solyc03g119740	SL3.0ch03	69781923	69783923	-	124	10	7	4	92.537	63.636	-28.9009	0.024733	0.111288	4.70765	0.770775	1
Solyc03g119750	SL3.0ch03	69783001	69785001	-	88	5	0	10	94.624	0	-94.6237	1.73544e-09	-0.559853	2.78929	0.184889	1
Solyc03g119770	SL3.0ch03	69809696	69811696	+	819	203	635	291	80.137	68.575	-11.5625	5.03923e-08	0	-3.91086	1	1
Solyc03g119800	SL3.0ch03	69856044	69858044	-	493	377	422	419	56.667	50.178	-6.48831	0.016688	2.52921	-3.8387	0.667547	1
Solyc03g119830	SL3.0ch03	69892579	69894579	-	374	242	300	278	60.714	51.903	-8.81117	0.0062534	0.439699	2.36623	0.32862	1
Solyc03g119850	SL3.0ch03	69892579	69894579	-	374	242	300	278	60.714	51.903	-8.81117	0.0062534	3.60648	-2.97064	0.29062	1
Solyc03g119870	SL3.0ch03	69900928	69902928	-	861	255	828	399	77.151	67.482	-9.66888	1.42964e-06	0.367566	1.26881	0.542568	1
Solyc03g119880	SL3.0ch03	69905785	69907785	+	1292	396	986	416	76.54	70.328	-6.21218	0.000451653	0	-3.87203	1	1
Solyc03g119930	SL3.0ch03	69952744	69954744	-	1576	602	1421	669	72.36	67.99	-4.36953	0.00503884	-1.1706	3.01201	0.0479629	0.994919
Solyc03g120050	SL3.0ch03	70035533	70037533	-	326	600	226	583	35.205	27.936	-7.26946	0.00385568	1.47072	-1.258	0.0503592	1
Solyc03g120120	SL3.0ch03	70091151	70093151	+	1324	906	1166	925	59.372	55.763	-3.6094	0.0331874	0.0848864	3.38705	0.866892	1
Solyc03g120140	SL3.0ch03	70101993	70103993	+	124	9	91	78	93.233	53.846	-39.3869	1.12748e-13	0.239421	6.08781	0.400576	1
Solyc03g120200	SL3.0ch03	70150038	70152038	-	1668	153	1563	187	91.598	89.314	-2.28374	0.040097	0.0848354	3.74303	0.815428	1
Solyc03g120260	SL3.0ch03	70192874	70194874	+	684	378	710	491	64.407	59.117	-5.28938	0.0218396	3.44599	2.95938	0.00296153	0.228293
Solyc03g120340	SL3.0ch03	70251175	70253175	-	1788	678	1315	623	72.506	67.853	-4.65263	0.00265433	-0.0742018	3.97851	0.840768	1
Solyc03g120410	SL3.0ch03	70299199	70301199	+	365	354	364	466	50.765	43.855	-6.90953	0.0151996	-0.14113	2.39488	0.772861	1
Solyc03g120440	SL3.0ch03	70315832	70317832	-	66	390	24	293	14.474	7.571	-6.90271	0.00761278	1.31291	5.69552	0.00573628	0.345413
Solyc03g120430	SL3.0ch03	70310155	70312155	-	201	80	155	105	71.53	59.615	-11.9149	0.00914334	-0.979003	0.968416	0.0750961	1
Solyc03g120540	SL3.0ch03	70391328	70393328	+	938	531	701	578	63.853	54.808	-9.04452	1.02314e-05	0.46574	4.3685	0.238568	1
Solyc03g120580	SL3.0ch03	70437927	70439927	-	1129	43	1000	65	96.331	93.897	-2.43434	0.0166377	0.540441	3.38653	0.250851	1
Solyc03g120620	SL3.0ch03	70448222	70450222	+	786	528	712	580	59.817	55.108	-4.70899	0.0299791	0.223859	3.25937	0.652454	1
Solyc03g120640	SL3.0ch03	70459507	70461507	+	407	332	345	409	55.074	45.756	-9.31846	0.00121394	-0.766414	6.65953	0.0276651	0.784713
[truncated: 4,554 more rows]

## Sheet: PHYA_vs_WT_IG_hypermethylated
Supplementary Table 14. Total differentially methylated promoters (DMPs) in CG context
ID	chr	from	to	strand	met_WT	unmet_WT	met_PHYA	unmet_PHYA	X.met_WT	X.met_PHYA	X.diff_PHYA.ctrl	FDR_diff_PHYA.WT	logFC_PHYA	logCPM_PHYA	PValue_PHYA	padj_PHYA
Solyc00g005000	SL3.0ch00	14479	16479	+	339	623	317	353	35.239	47.313	12.0743	7.11515e-06	0	-2.90244	1	1
Solyc00g006170	SL3.0ch00	4099287	4101287	+	581	89	360	22	86.716	94.241	7.52442	0.000402602	0	-3.91086	1	1
Solyc00g005903	SL3.0ch00	4162096	4164096	+	10854	933	12904	994	92.084	92.848	0.763392	0.0382008	0	-3.91086	1	1
Solyc00g006480	SL3.0ch00	4232311	4234311	+	258	85	243	47	75.219	83.793	8.57444	0.0175559	0	-3.91086	1	1
Solyc00g006483	SL3.0ch00	4286251	4288251	-	483	72	563	48	87.027	92.144	5.117	0.0116206	0	-3.91086	1	1
Solyc00g006867	SL3.0ch00	6390079	6392079	+	122	566	232	369	17.733	38.602	20.8698	1.3589e-15	-0.716583	-0.558252	0.4393	1
Solyc00g007960	SL3.0ch00	6934602	6936602	-	633	78	700	45	89.03	93.96	4.9302	0.00273709	0	-3.91086	1	1
Solyc00g008020	SL3.0ch00	6991194	6993194	-	65	15	312	28	81.25	91.765	10.5147	0.0244055	0	-3.91086	1	1
Solyc00g008055	SL3.0ch00	7069205	7071205	-	189	21	288	9	90	96.97	6.9697	0.00482945	0	-3.91086	1	1
Solyc00g008160	SL3.0ch00	7159867	7161867	-	753	68	1129	65	91.717	94.556	2.8387	0.0265273	0	-3.91086	1	1
Solyc00g008260	SL3.0ch00	7277831	7279831	+	4111	324	5327	343	92.694	93.951	1.25614	0.0246146	0	-3.91086	1	1
Solyc00g009050	SL3.0ch00	7822149	7824149	-	1830	247	1725	93	88.108	94.884	6.77664	6.36202e-13	0.660193	-1.83144	0.569434	1
Solyc00g009140	SL3.0ch00	7885380	7887380	+	137	247	147	164	35.677	47.267	11.5898	0.0064039	-1.06502	3.36058	0.0187793	0.657884
Solyc00g009141	SL3.0ch00	7897016	7899016	-	1311	287	1466	248	82.04	85.531	3.49087	0.0155498	-0.0625573	4.45932	0.834802	1
Solyc00g009540	SL3.0ch00	8210678	8212678	-	696	94	576	52	88.101	91.72	3.61848	0.04766	0	-3.91086	1	1
Solyc00g009650	SL3.0ch00	8316387	8318387	-	1412	108	1603	76	92.895	95.473	2.57876	0.00494167	0	-3.91086	1	1
Solyc00g010755	SL3.0ch00	8974152	8976152	-	681	90	973	82	88.327	92.227	3.90064	0.013045	-4.45443	-2.03165	0.00077025	0.0883022
Solyc00g010930	SL3.0ch00	9019959	9021959	+	5857	493	5901	333	92.236	94.658	2.4221	3.63933e-07	0	-3.91086	1	1
Solyc00g013110	SL3.0ch00	9719089	9721089	-	399	2789	380	1737	12.516	17.95	5.43425	5.67185e-07	0	-3.91086	1	1
Solyc00g013120	SL3.0ch00	9726388	9728388	-	684	2694	705	1563	20.249	31.085	10.836	1.35557e-18	-2.56745	-3.0418	0.622599	1
Solyc00g013130	SL3.0ch00	9727452	9729452	-	1300	8725	1188	5163	12.968	18.706	5.73813	2.48375e-21	4.3203	-3.50607	0.210152	1
Solyc00g013133	SL3.0ch00	9727784	9729784	-	1395	9378	1336	5588	12.949	19.295	6.34617	1.05974e-27	1.79071	-3.38388	1	1
Solyc00g013137	SL3.0ch00	9730078	9732078	-	720	1848	683	1107	28.037	38.156	10.119	4.41943e-11	1.78517	-3.78951	1	1
Solyc00g013140	SL3.0ch00	9737602	9739602	-	2113	24259	1926	16521	8.012	10.441	2.42844	5.36615e-17	-1.42289	-1.03249	0.143394	1
Solyc00g013150	SL3.0ch00	9736648	9738648	+	1615	26180	1742	17505	5.81	9.051	3.24036	3.08019e-38	1.9493	-2.82133	0.252768	1
Solyc00g013155	SL3.0ch00	9739388	9741388	-	782	9080	630	5621	7.929	10.078	2.14896	1.85511e-05	1.65604	-3.15174	0.621835	1
Solyc00g013160	SL3.0ch00	9741809	9743809	-	1609	19828	1448	11594	7.506	11.103	3.59688	1.40797e-27	-0.436295	-1.09184	0.683674	1
Solyc00g013170	SL3.0ch00	9740381	9742381	+	1920	19444	1616	11752	8.987	12.089	3.10149	1.09464e-18	1.38394	-1.39935	0.287353	1
Solyc00g013180	SL3.0ch00	9744467	9746467	-	1411	17453	1350	9202	7.48	12.794	5.31393	8.02777e-47	2.99835	-2.83542	0.040301	0.92581
Solyc00g014170	SL3.0ch00	9966728	9968728	+	2461	369	2575	284	86.961	90.066	3.10533	0.000896432	0	-3.91086	1	1
Solyc00g017760	SL3.0ch00	10585381	10587381	-	8656	1414	9003	1316	85.958	87.247	1.28853	0.0155531	0	-3.91086	1	1
Solyc00g019620	SL3.0ch00	10819131	10821131	-	1055	9728	1037	7083	9.784	12.771	2.98702	1.5616e-09	0	-3.91086	1	1
Solyc00g019630	SL3.0ch00	10819968	10821968	-	3121	44685	2443	26506	6.528	8.439	1.91051	4.80803e-21	0	-3.91086	1	1
Solyc00g019730	SL3.0ch00	10829313	10831313	-	2075	19344	1916	14531	9.688	11.65	1.96188	1.03924e-08	0.391827	-2.0331	0.799516	1
Solyc00g019740	SL3.0ch00	10830415	10832415	-	2025	21365	2253	17244	8.658	11.556	2.89808	1.40309e-21	1.16189	-1.30025	0.455904	1
Solyc00g019750	SL3.0ch00	10831749	10833749	-	608	4932	631	3698	10.975	14.576	3.60139	7.95943e-07	4.76093	-3.27884	0.1375	1
Solyc00g020010	SL3.0ch00	10853344	10855344	-	2095	29643	1778	17183	6.601	9.377	2.77622	1.51839e-27	3.15341	-3.39345	0.432078	1
Solyc00g020030	SL3.0ch00	10854853	10856853	-	2726	31531	2243	20941	7.957	9.675	1.71728	1.59646e-11	0	-3.91086	1	1
Solyc00g020040	SL3.0ch00	10854013	10856013	+	2706	32408	2417	19825	7.706	10.867	3.1605	1.79562e-35	4.13842	-2.8213	0.189607	1
Solyc00g022107	SL3.0ch00	11072272	11074272	-	1033	434	1061	352	70.416	75.088	4.67265	0.0117802	2.81073	-2.03865	0.0409906	0.928674
Solyc00g022920	SL3.0ch00	11136177	11138177	+	1634	177	1930	147	90.226	92.922	2.69609	0.00646954	0	-3.91086	1	1
Solyc00g023710	SL3.0ch00	11199671	11201671	-	1009	9226	977	5757	9.858	14.508	4.65014	2.49742e-18	1.78813	-3.87428	1	1
Solyc00g024150	SL3.0ch00	11224558	11226558	+	765	389	678	276	66.291	71.069	4.77802	0.038006	-0.60403	5.42107	0.070017	1
Solyc00g025290	SL3.0ch00	11313892	11315892	+	1131	15608	1157	9499	6.757	10.858	4.10106	2.94048e-30	1.69592	-1.17448	0.360159	1
Solyc00g025300	SL3.0ch00	11317263	11319263	-	1405	15300	1105	9632	8.411	10.292	1.88086	1.27764e-06	3.37047	-3.77034	0.530747	1
Solyc00g028550	SL3.0ch00	11530930	11532930	-	146	88	168	51	62.393	76.712	14.3192	0.0032078	0	-3.91086	1	1
Solyc00g028560	SL3.0ch00	11532006	11534006	-	587	144	631	77	80.301	89.124	8.82334	2.15035e-05	0	-3.91086	1	1
Solyc00g028960	SL3.0ch00	11558082	11560082	-	318	229	351	190	58.135	64.88	6.74457	0.0436055	0	-3.91086	1	1
Solyc00g029070	SL3.0ch00	11558045	11560045	+	318	229	351	190	58.135	64.88	6.74457	0.0436055	0	-3.91086	1	1
Solyc00g030000	SL3.0ch00	11624489	11626489	-	1027	1068	1779	856	49.021	67.514	18.4928	8.92839e-36	0	-3.47695	1	1
Solyc00g030100	SL3.0ch00	11623845	11625845	+	2702	805	4120	1040	77.046	79.845	2.79905	0.00521021	3.84966	-3.62704	0.240531	1
Solyc00g030820	SL3.0ch00	11677156	11679156	-	476	297	487	224	61.578	68.495	6.91681	0.0126467	1.20181	-2.52453	0.384985	1
Solyc00g042850	SL3.0ch00	12333955	12335955	+	478	482	442	242	49.792	64.62	14.8282	2.79144e-08	-1.91433	-3.87151	1	1
Solyc00g042854	SL3.0ch00	12376717	12378717	+	1210	340	1165	249	78.065	82.39	4.32587	0.0079903	0	-3.91086	1	1
Solyc00g044550	SL3.0ch00	12421120	12423120	+	383	4474	312	2772	7.886	10.117	2.23121	0.00222433	0	-3.91086	1	1
Solyc00g047180	SL3.0ch00	12551302	12553302	-	133	9379	154	6867	1.398	2.193	0.795186	0.000544692	0	-3.91086	1	1
Solyc00g052540	SL3.0ch00	12815691	12817691	-	762	748	844	647	50.464	56.606	6.14273	0.00235377	0	-3.91086	1	1
Solyc00g059500	SL3.0ch00	13133839	13135839	+	762	658	802	548	53.662	59.407	5.74544	0.00640985	0.433903	1.15726	0.47525	1
Solyc00g063110	SL3.0ch00	13302234	13304234	-	3244	614	2863	428	84.085	86.995	2.90982	0.00172219	0	-3.91086	1	1
Solyc00g065510	SL3.0ch00	13406910	13408910	+	1085	144	1156	99	88.283	92.112	3.8284	0.00414028	0	-3.91086	1	1
Solyc00g069880	SL3.0ch00	13590952	13592952	+	1737	6462	2218	4233	21.186	34.382	13.1968	1.6511e-68	0	-3.91086	1	1
Solyc00g069883	SL3.0ch00	13619826	13621826	+	524	52	966	58	90.972	94.336	3.36372	0.0261054	0	-3.91086	1	1
Solyc00g072800	SL3.0ch00	13717078	13719078	+	635	24025	513	16180	2.575	3.073	0.498124	0.00710654	0	-3.91086	1	1
Solyc00g080750	SL3.0ch00	14049269	14051269	-	496	831	549	658	37.378	45.485	8.10713	0.000171624	4.31746	-2.54729	0.103078	1
Solyc00g084870	SL3.0ch00	14214156	14216156	+	4	11	21	1	26.667	95.455	68.7879	8.26978e-05	0	-3.91086	1	1
Solyc00g094540	SL3.0ch00	14584899	14586899	+	1891	17390	2061	10607	9.808	16.269	6.46176	2.96198e-62	1.3738	-3.06611	0.566386	1
Solyc00g094550	SL3.0ch00	14588391	14590391	-	481	3928	437	2634	10.91	14.23	3.32039	9.74064e-05	0	-3.91086	1	1
Solyc00g095465	SL3.0ch00	14631843	14633843	+	88	17	77	4	83.81	95.062	11.2522	0.0350815	0	-3.91086	1	1
Solyc00g097260	SL3.0ch00	14687968	14689968	+	1560	264	1499	185	85.526	89.014	3.48794	0.00544213	0	-3.67847	1	1
Solyc00g097960	SL3.0ch00	14713567	14715567	+	561	460	397	233	54.946	63.016	8.06974	0.00410187	-0.331989	0.756639	0.627113	1
Solyc00g099160	SL3.0ch00	14760965	14762965	-	45	673	46	326	6.267	12.366	6.09818	0.00237677	0	-3.91086	1	1
Solyc00g108555	SL3.0ch00	15117950	15119950	-	163	415	221	399	28.201	35.645	7.44447	0.0143457	0	-3.91086	1	1
Solyc00g110370	SL3.0ch00	15166354	15168354	-	208	978	240	875	17.538	21.525	3.98672	0.0332234	1.78551	-3.80122	1	1
Solyc00g126000	SL3.0ch00	15683423	15685423	+	915	29477	752	19757	3.011	3.667	0.656022	0.000234894	-0.149921	-2.24814	1	1
Solyc00g126010	SL3.0ch00	15683740	15685740	+	765	27555	657	18090	2.701	3.505	0.80329	5.59379e-06	-0.322317	-1.72909	0.865637	1
Solyc00g127545	SL3.0ch00	15727898	15729898	+	759	142	727	86	84.24	89.422	5.18216	0.00470152	0	-3.91086	1	1
Solyc00g128870	SL3.0ch00	15771534	15773534	+	178	189	235	89	48.501	72.531	24.0295	1.95767e-09	0.257484	3.49961	0.500331	1
Solyc00g136260	SL3.0ch00	16015399	16017399	-	459	588	496	485	43.84	50.561	6.72111	0.00646954	0.0786932	4.73268	0.869079	1
Solyc00g142170	SL3.0ch00	16203631	16205631	-	798	12372	740	8355	6.059	8.136	2.07711	2.90696e-08	0	-3.69284	1	1
Solyc00g142160	SL3.0ch00	16203089	16205089	-	1248	18920	1124	12706	6.188	8.127	1.93924	1.2955e-10	0	-3.86883	1	1
Solyc00g147570	SL3.0ch00	16374656	16376656	-	764	72	787	44	91.388	94.705	3.31761	0.0192801	-2.44316	-3.65539	0.470804	1
Solyc00g153980	SL3.0ch00	16568348	16570348	+	1011	12309	990	7894	7.59	11.144	3.55354	9.98714e-18	0	-3.86959	1	1
Solyc00g160785	SL3.0ch00	16794746	16796746	-	786	110	701	68	87.723	91.157	3.43413	0.0449748	0	-3.91086	1	1
Solyc00g164580	SL3.0ch00	16884713	16886713	+	723	1956	831	1319	26.988	38.651	11.6635	2.31949e-16	1.81213	-3.69127	1	1
Solyc00g164680	SL3.0ch00	16887526	16889526	+	878	18457	841	12834	4.541	6.15	1.60892	1.81157e-09	0.234465	3.66247	0.598658	1
Solyc00g170210	SL3.0ch00	17052994	17054994	-	481	65	517	34	88.095	93.829	5.73416	0.00304009	0.0727651	2.98697	0.870219	1
Solyc00g171810	SL3.0ch00	17098009	17100009	-	89	6218	277	4162	1.411	6.24	4.82901	6.58138e-40	0.937362	1.65316	0.119718	1
Solyc00g178340	SL3.0ch00	17279849	17281849	+	926	419	888	326	68.848	73.147	4.29904	0.0345441	0	-3.91086	1	1
Solyc00g181240	SL3.0ch00	17363185	17365185	-	655	15213	552	9917	4.128	5.273	1.14491	8.22757e-05	0	-3.6317	1	1
Solyc00g195350	SL3.0ch00	17751071	17753071	+	229	45	276	26	83.577	91.391	7.81409	0.0118432	0	-3.91086	1	1
Solyc00g188855	SL3.0ch00	17751239	17753239	+	286	48	330	28	85.629	92.179	6.55003	0.0158139	0	-3.91086	1	1
Solyc00g195360	SL3.0ch00	17751902	17753902	+	840	85	881	35	90.811	96.179	5.36823	1.72419e-05	0	-3.8258	1	1
Solyc00g203660	SL3.0ch00	17977333	17979333	-	757	997	753	622	43.158	54.764	11.6051	1.82202e-09	0.721862	-0.371376	0.505969	1
Solyc00g210860	SL3.0ch00	18168651	18170651	-	776	10782	590	7198	6.714	7.576	0.861793	0.039584	1.89691	-3.83419	1	1
Solyc00g217560	SL3.0ch00	18339728	18341728	+	281	292	710	420	49.04	62.832	13.7917	5.18931e-07	0	-3.91086	1	1
Solyc00g218560	SL3.0ch00	18367559	18369559	-	6452	783	7063	691	89.178	91.088	1.91086	0.000392927	0	-3.82402	1	1
Solyc00g222063	SL3.0ch00	18461232	18463232	+	2532	408	2893	359	86.122	88.961	2.83819	0.0023809	0	-3.91086	1	1
Solyc00g227960	SL3.0ch00	18606154	18608154	+	1	111	76	3	0.893	96.203	95.3097	2.72125e-46	0	-3.91086	1	1
Solyc00g230060	SL3.0ch00	18657729	18659729	+	628	116	741	85	84.409	89.709	5.30084	0.00513921	-0.907075	-3.59771	0.783536	1
Solyc00g230070	SL3.0ch00	18661095	18663095	-	2079	40744	1877	25312	4.855	6.904	2.04866	6.94111e-28	-3.96417	-2.95418	0.172683	1
Solyc00g230080	SL3.0ch00	18661507	18663507	-	1290	9061	974	6175	12.463	13.624	1.16172	0.0434293	0.517107	-2.12624	0.75581	1
Solyc00g231680	SL3.0ch00	18701854	18703854	-	2533	4200	2107	2527	37.621	45.468	7.8476	1.78082e-15	-4.16386	-3.62281	0.295476	1
Solyc00g244290	SL3.0ch00	19010831	19012831	+	418	14875	358	9587	2.733	3.6	0.866522	0.000474234	-0.405757	-1.54516	0.802014	1
Solyc00g244300	SL3.0ch00	19011391	19013391	+	679	27957	506	17225	2.371	2.854	0.482618	0.00414928	-0.175671	-2.18287	0.933006	1
Solyc00g254910	SL3.0ch00	19269195	19271195	-	728	104	218	16	87.5	93.162	5.66239	0.0272177	0	-3.91086	1	1
Solyc03g033920	SL3.0ch00	19875093	19877093	-	140	4379	684	3051	3.098	18.313	15.2152	1.13341e-119	0	-3.91086	1	1
Solyc00g281110	SL3.0ch00	19877327	19879327	-	99	4776	96	3216	2.031	2.899	0.867781	0.0242577	0	-3.67847	1	1
Solyc00g284510	SL3.0ch00	19955093	19957093	-	742	64	1121	56	92.06	95.242	3.18259	0.00960266	0	-3.91086	1	1
Solyc00g309530	SL3.0ch00	20503857	20505857	+	320	1822	388	1620	14.939	19.323	4.3834	0.000738098	0	-3.91086	1	1
Solyc00g320430	SL3.0ch00	20737048	20739048	+	1025	3784	1087	2879	21.314	27.408	6.09377	4.98473e-10	3.5963	-3.27111	0.428771	1
Solyc01g005010	SL3.0ch01	21061	23061	+	886	525	845	416	62.792	67.01	4.21796	0.0411345	-0.188518	1.58303	0.812626	1
Solyc01g005080	SL3.0ch01	73169	75169	-	317	809	368	716	28.153	33.948	5.79559	0.00811136	-0.0882511	3.48798	0.87775	1
Solyc01g005130	SL3.0ch01	122769	124769	+	177	224	186	119	44.14	60.984	16.844	5.41736e-05	-0.106701	4.23302	0.775325	1
Solyc01g005190	SL3.0ch01	149494	151494	+	11	57	73	70	16.176	51.049	34.8725	6.6596e-06	-0.154148	-1.30319	0.935446	1
Solyc01g005250	SL3.0ch01	195082	197082	-	470	364	421	254	56.355	62.37	6.01545	0.0372989	-0.0460296	5.69157	0.870267	1
Solyc01g005290	SL3.0ch01	209394	211394	-	260	159	254	106	62.053	70.556	8.50305	0.0291452	-1.21967	3.2152	0.0698162	1
Solyc01g005320	SL3.0ch01	228608	230608	-	222	253	263	223	46.737	54.115	7.37838	0.0423238	1.98129	-3.12998	0.251609	1
Solyc01g005480	SL3.0ch01	330990	332990	+	1958	312	2174	222	86.256	90.735	4.47905	1.03467e-05	-0.0430485	2.97566	0.917575	1
Solyc01g005650	SL3.0ch01	457261	459261	-	958	564	899	423	62.943	68.003	5.05953	0.0117458	0	-3.91086	1	1
Solyc01g005690	SL3.0ch01	480426	482426	-	48	159	231	178	23.188	56.479	33.2908	3.75217e-14	-0.349297	5.53446	0.231754	1
Solyc01g005715	SL3.0ch01	486056	488056	+	19	12	10	0	61.29	100	38.7097	0.0374663	-0.137326	-1.13064	0.91827	1
Solyc01g005770	SL3.0ch01	502223	504223	-	18	28	22	4	39.13	84.615	45.4849	0.000738553	0	-3.65929	1	1
Solyc01g005795	SL3.0ch01	508898	510898	-	1110	554	894	373	66.707	70.56	3.85365	0.0471728	1.04421	-3.00548	0.665712	1
Solyc01g005840	SL3.0ch01	569880	571880	+	1267	441	1300	353	74.18	78.645	4.46456	0.00611632	-0.394509	3.80079	0.312377	1
Solyc01g005860	SL3.0ch01	580028	582028	-	85	65	78	23	56.667	77.228	20.5611	0.00333241	-1.23857	-3.15287	0.627972	1
Solyc01g006080	SL3.0ch01	749861	751861	-	1155	800	1252	536	59.079	70.022	10.9431	5.05163e-11	-0.941241	-3.3552	0.659548	1
Solyc01g006180	SL3.0ch01	818879	820879	-	418	35	264	6	92.274	97.778	5.50405	0.00405922	0.485914	3.451	0.182652	1
Solyc01g006250	SL3.0ch01	864064	866064	-	2553	263	2518	177	90.661	93.432	2.77177	0.000592852	0.150848	1.7532	0.758058	1
Solyc01g006260	SL3.0ch01	864281	866281	+	2323	255	2223	176	90.109	92.664	2.555	0.00413803	-0.103943	2.11748	0.862005	1
Solyc01g006280	SL3.0ch01	871778	873778	+	1053	697	1130	546	60.171	67.422	7.25101	5.54991e-05	-0.34669	7.70616	0.274347	1
Solyc01g006340	SL3.0ch01	912902	914902	+	1766	297	1473	177	85.603	89.273	3.66924	0.00272724	-0.0998144	3.00127	0.803711	1
Solyc01g006380	SL3.0ch01	1010478	1012478	+	696	191	681	123	78.467	84.701	6.23475	0.00326011	-6.32819	-2.90952	0.0694179	1
Solyc01g006390	SL3.0ch01	1018236	1020236	-	197	355	226	232	35.688	49.345	13.6566	6.76588e-05	0	-2.19871	1	1
Solyc01g006440	SL3.0ch01	1053164	1055164	-	235	265	265	181	47	59.417	12.417	0.000588367	-0.665274	-3.03957	0.789814	1
Solyc01g006460	SL3.0ch01	1067132	1069132	-	871	958	1052	953	47.622	52.469	4.84718	0.00742339	-5.38321	-1.07086	0.0119775	0.524372
Solyc01g006665	SL3.0ch01	1250912	1252912	+	227	44	221	16	83.764	93.249	9.48511	0.00272168	0	-3.91086	1	1
Solyc01g006670	SL3.0ch01	1259615	1261615	-	161	143	140	15	52.961	90.323	37.3621	1.16015e-15	-1.25636	3.1716	0.00325904	0.242383
Solyc01g006750	SL3.0ch01	1341810	1343810	+	1697	2951	1555	1818	36.51	46.101	9.59107	1.95572e-16	0	-3.91086	1	1
Solyc01g006755	SL3.0ch01	1344209	1346209	-	1296	484	1258	370	72.809	77.273	4.46374	0.0075532	0	-3.91086	1	1
Solyc01g006780	SL3.0ch01	1360056	1362056	-	1111	1058	1013	324	51.222	75.767	24.5449	1.85409e-46	-0.525192	-1.86124	0.751351	1
Solyc01g006870	SL3.0ch01	1438520	1440520	-	864	217	904	139	79.926	86.673	6.74706	0.000163139	0.211902	4.3424	0.472526	1
Solyc01g006920	SL3.0ch01	1485514	1487514	+	1641	399	1516	270	80.441	84.882	4.44124	0.00116223	0.362218	0.315771	0.552946	1
Solyc01g006960	SL3.0ch01	1539151	1541151	-	2497	1113	2065	717	69.169	74.227	5.0582	4.89031e-05	0.151261	5.44206	0.574469	1
Solyc01g006970	SL3.0ch01	1539025	1541025	+	2535	1115	2129	748	69.452	74.001	4.54864	0.000242217	0.574819	5.18677	0.0844491	1
Solyc01g007990	SL3.0ch01	2102280	2104280	+	992	754	951	589	56.816	61.753	4.93767	0.0105559	0.432721	3.79441	0.344574	1
Solyc01g008005	SL3.0ch01	2115300	2117300	-	670	379	564	244	63.87	69.802	5.93163	0.016296	2.01854	-2.93575	0.345863	1
Solyc01g008010	SL3.0ch01	2114731	2116731	+	701	450	615	279	60.904	68.792	7.88838	0.000850281	0.151403	3.31523	0.674538	1
Solyc01g008030	SL3.0ch01	2127601	2129601	+	952	448	1010	379	68	72.714	4.71418	0.0155073	1.07461	-3.69242	0.820614	1
Solyc01g008070	SL3.0ch01	2145601	2147601	+	998	768	1239	673	56.512	64.801	8.28936	2.0633e-06	0.167849	5.52435	0.637808	1
Solyc01g008090	SL3.0ch01	2163677	2165677	-	1277	1587	1129	1194	44.588	48.601	4.01296	0.0102636	0.140259	7.32873	0.687439	1
Solyc01g008160	SL3.0ch01	2239912	2241912	-	904	841	893	609	51.805	59.454	7.6489	6.84935e-05	-0.302097	4.02135	0.439689	1
Solyc01g008290	SL3.0ch01	2329217	2331217	+	1059	197	959	100	84.315	90.557	6.24184	3.72925e-05	0.186707	3.61434	0.619175	1
Solyc01g008330	SL3.0ch01	2381098	2383098	+	722	203	786	85	78.054	90.241	12.187	2.42488e-11	-0.451405	5.78318	0.220474	1
Solyc01g008370	SL3.0ch01	2417918	2419918	-	2389	246	2695	196	90.664	93.22	2.5562	0.00164374	0.0143885	7.74719	0.957724	1
Solyc01g008430	SL3.0ch01	2451862	2453862	-	808	279	1560	314	74.333	83.244	8.91137	9.64321e-08	0	-3.91086	1	1
Solyc01g008450	SL3.0ch01	2472937	2474937	-	1392	536	1268	403	72.199	75.883	3.68353	0.0262394	1.46632	-2.62191	0.521711	1
Solyc01g008471	SL3.0ch01	2487945	2489945	+	623	173	669	120	78.266	84.791	6.52454	0.00284078	0	-3.64543	1	1
Solyc01g008480	SL3.0ch01	2500548	2502548	+	4164	775	5986	809	84.309	88.094	3.78562	4.10328e-08	0.12575	3.67507	0.782813	1
Solyc01g008550	SL3.0ch01	2584641	2586641	-	2953	487	3152	437	85.843	87.824	1.98088	0.0286327	-0.149187	5.03723	0.828873	1
Solyc01g008570	SL3.0ch01	2605315	2607315	-	1356	281	1504	235	82.834	86.486	3.65203	0.00860688	0	-3.91086	1	1
Solyc01g008670	SL3.0ch01	2667796	2669796	-	721	300	804	256	70.617	75.849	5.23201	0.0162875	1.68893	-1.96782	0.436642	1
Solyc01g008830	SL3.0ch01	2786576	2788576	+	1752	557	1695	346	75.877	83.048	7.17052	6.14291e-08	-1.11973	0.328201	0.141673	1
Solyc01g008850	SL3.0ch01	2810081	2812081	+	1969	814	1895	663	70.751	74.081	3.33033	0.0155332	0.239329	8.03442	0.419187	1
Solyc01g008880	SL3.0ch01	2835494	2837494	-	447	356	472	256	55.666	64.835	9.16891	0.000922101	0	-3.50504	1	1
Solyc01g008930	SL3.0ch01	2890200	2892200	-	513	223	491	163	69.701	75.076	5.37537	0.0459109	-0.463912	3.20711	0.244949	1
Solyc01g009000	SL3.0ch01	2944501	2946501	+	138	38	116	3	78.409	97.479	19.0699	4.80677e-06	0.00686668	5.36564	0.981775	1
Solyc01g009040	SL3.0ch01	2974050	2976050	+	2470	828	2550	711	74.894	78.197	3.303	0.00458264	-1.80615	-0.560492	0.0966431	1
Solyc01g009100	SL3.0ch01	3044067	3046067	+	2018	263	1674	169	88.47	90.83	2.3602	0.0274546	0.0182148	7.06217	0.961933	1
Solyc01g009170	SL3.0ch01	3139805	3141805	-	2	34	24	35	5.556	40.678	35.1224	0.000479609	0.266689	6.16646	0.441483	1
Solyc01g009380	SL3.0ch01	3504027	3506027	+	3473	434	3221	248	88.892	92.851	3.95923	3.98992e-08	0.0153318	4.62822	0.958666	1
Solyc01g009450	SL3.0ch01	3615767	3617767	-	815	357	789	253	69.539	75.72	6.18052	0.00346138	-0.020885	7.02751	0.938034	1
Solyc01g009565	SL3.0ch01	3753514	3755514	+	496	221	655	222	69.177	74.686	5.5093	0.0299999	-1.77063	-3.46136	0.555515	1
Solyc01g009570	SL3.0ch01	3754018	3756018	+	391	196	570	167	66.61	77.341	10.7307	8.94463e-05	0.786773	-3.72822	1	1
Solyc01g009650	SL3.0ch01	3819523	3821523	+	622	208	626	126	74.94	83.245	8.30492	0.000254071	0	-3.87229	1	1
Solyc01g009645	SL3.0ch01	3819590	3821590	+	622	208	626	126	74.94	83.245	8.30492	0.000254071	0	-3.91086	1	1
Solyc01g009740	SL3.0ch01	4038809	4040809	-	339	178	340	130	65.571	72.34	6.76983	0.0413372	0	-3.91086	1	1
Solyc01g009900	SL3.0ch01	4393714	4395714	+	815	849	786	668	48.978	54.058	5.07941	0.0118246	0	-3.91086	1	1
Solyc01g009910	SL3.0ch01	4411264	4413264	+	1749	528	1796	442	76.812	80.25	3.43863	0.0121359	0	-3.91086	1	1
Solyc01g010035	SL3.0ch01	4595475	4597475	+	161	29	225	8	84.737	96.567	11.8297	9.66091e-05	-5.03621	-3.08346	0.153187	1
Solyc01g010210	SL3.0ch01	4926330	4928330	+	1296	7790	1157	5348	14.264	17.786	3.52262	3.55555e-08	0	-3.91086	1	1
Solyc01g010270	SL3.0ch01	5003409	5005409	-	1117	882	1065	528	55.878	66.855	10.9771	3.57996e-10	-0.017111	6.90059	0.964447	1
Solyc01g010350	SL3.0ch01	5097729	5099729	-	1343	330	1163	222	80.275	83.971	3.69616	0.0176007	0	-3.47068	1	1
Solyc01g010370	SL3.0ch01	5140792	5142792	-	509	804	592	646	38.766	47.819	9.05288	2.44775e-05	-0.431373	1.90014	0.358725	1
Solyc01g010430	SL3.0ch01	5281639	5283639	+	741	434	841	329	63.064	71.88	8.81651	3.14402e-05	0.321014	6.79427	0.569116	1
Solyc01g010460	SL3.0ch01	5298821	5300821	+	1638	458	1482	287	78.149	83.776	5.62729	5.18707e-05	-0.00444387	1.60746	1	1
Solyc01g010500	SL3.0ch01	5395204	5397204	-	1568	299	1316	201	83.985	86.75	2.76516	0.0438392	-4.18955	-3.66935	0.193951	1
Solyc01g010506	SL3.0ch01	5441999	5443999	+	704	212	753	173	76.856	81.317	4.4616	0.0349607	0	-3.91086	1	1
Solyc01g010580	SL3.0ch01	5532841	5534841	+	1412	273	1512	192	83.798	88.732	4.93417	0.000152901	0.169436	8.11103	0.56151	1
Solyc01g010660	SL3.0ch01	5615545	5617545	+	1575	686	1622	589	69.659	73.36	3.70103	0.0147138	0.0754237	5.97609	0.879009	1
Solyc01g010740	SL3.0ch01	5725249	5727249	-	468	319	353	186	59.466	65.492	6.02532	0.0488495	0	-3.91086	1	1
Solyc01g010793	SL3.0ch01	5788659	5790659	+	578	147	367	31	79.724	92.211	12.4869	1.20964e-07	0	-3.91086	1	1
Solyc01g010950	SL3.0ch01	6457538	6459538	-	788	532	846	443	59.697	65.632	5.9353	0.00499473	0.103547	4.75747	0.717742	1
Solyc01g011070	SL3.0ch01	7101206	7103206	-	628	62	557	31	91.014	94.728	3.7134	0.0251881	0	-3.91086	1	1
Solyc01g011090	SL3.0ch01	7547993	7549993	+	2092	953	2184	580	68.703	79.016	10.3131	1.38826e-17	0	-3.91086	1	1
Solyc01g011091	SL3.0ch01	7547993	7549993	+	2092	953	2184	580	68.703	79.016	10.3131	1.38826e-17	0.444077	-1.75331	0.631016	1
Solyc01g011095	SL3.0ch01	7604209	7606209	+	760	239	577	126	76.076	82.077	6.00074	0.00813172	-0.619467	-0.474966	0.517251	1
Solyc01g011190	SL3.0ch01	8019475	8021475	-	1228	121	1748	123	91.03	93.426	2.39558	0.0248685	4.96751	-3.03977	0.0325369	0.844912
Solyc01g011390	SL3.0ch01	8706149	8708149	-	945	134	1167	100	87.581	92.107	4.52625	0.00109327	-4.19186	-3.50037	0.199346	1
Solyc01g011497	SL3.0ch01	9372169	9374169	-	990	314	1109	182	75.92	85.902	9.98216	1.36975e-09	0	-3.69581	1	1
Solyc01g012560	SL3.0ch01	9609113	9611113	+	279	33	146	6	89.423	96.053	6.62955	0.0355218	0	-3.91086	1	1
Solyc01g012690	SL3.0ch01	9814096	9816096	-	1266	134	1241	81	90.429	93.873	3.44435	0.0030665	0	-3.91086	1	1
Solyc01g013780	SL3.0ch01	10089410	10091410	-	2139	137	1415	59	93.981	95.997	2.01662	0.0150444	0	-3.91086	1	1
Solyc01g013915	SL3.0ch01	10356480	10358480	+	267	38	356	21	87.541	94.43	6.88872	0.00445443	-0.0648369	-3.22081	1	1
Solyc01g013995	SL3.0ch01	10737461	10739461	+	458	81	624	54	84.972	92.035	7.06323	0.000435568	0	-3.87203	1	1
Solyc01g014230	SL3.0ch01	11831053	11833053	-	879	294	915	221	74.936	80.546	5.60971	0.0038841	0.071547	4.42869	0.816831	1
Solyc01g014245	SL3.0ch01	11864759	11866759	+	417	458	579	378	47.657	60.502	12.8444	3.3776e-07	0.926578	3.24822	0.0438167	0.958553
Solyc01g014250	SL3.0ch01	11865561	11867561	+	366	882	455	662	29.327	40.734	11.4072	6.61357e-08	0.786689	4.16717	0.148422	1
Solyc01g014320	SL3.0ch01	11978676	11980676	+	350	60	364	33	85.366	91.688	6.3218	0.0129746	0	-3.87342	1	1
Solyc01g014397	SL3.0ch01	13017904	13019904	-	554	72	310	17	88.498	94.801	6.30282	0.00402868	0	-3.91086	1	1
Solyc01g014440	SL3.0ch01	13514435	13516435	+	307	72	112	11	81.003	91.057	10.0543	0.0171691	0	-3.91086	1	1
Solyc01g014560	SL3.0ch01	14271435	14273435	-	1518	766	1364	541	66.462	71.601	5.1387	0.00130415	-0.220446	3.26495	0.850273	1
Solyc01g014660	SL3.0ch01	14416763	14418763	-	1218	154	1102	93	88.776	92.218	3.44206	0.00789534	0	-3.74195	1	1
Solyc01g014715	SL3.0ch01	14521163	14523163	+	991	173	970	122	85.137	88.828	3.69038	0.0213876	0	-3.91086	1	1
Solyc01g014820	SL3.0ch01	15400912	15402912	-	911	89	824	49	91.1	94.387	3.28717	0.0166377	0	-3.91086	1	1
Solyc01g015240	SL3.0ch01	17961496	17963496	+	959	201	773	121	82.672	86.465	3.79291	0.0366131	0	-3.91086	1	1
Solyc01g016300	SL3.0ch01	18622146	18624146	-	484	71	740	69	87.207	91.471	4.26374	0.0272351	0	-3.91086	1	1
Solyc01g016370	SL3.0ch01	19006694	19008694	-	785	179	761	114	81.432	86.971	5.53989	0.00396791	0	-3.91086	1	1
Solyc01g016460	SL3.0ch01	19931727	19933727	-	32	134	602	87	19.277	87.373	68.0959	1.35579e-62	-5.21158	-0.617724	9.49905e-08	5.22711e-05
Solyc01g016540	SL3.0ch01	20365492	20367492	+	421	926	589	509	31.255	53.643	22.3883	2.95762e-27	0	-3.91086	1	1
Solyc01g016520	SL3.0ch01	20370859	20372859	-	192	203	211	109	48.608	65.938	17.3299	2.13036e-05	0	-3.76263	1	1
Solyc01g016670	SL3.0ch01	20932319	20934319	-	706	436	642	233	61.821	73.371	11.5501	4.3753e-07	0	-3.91086	1	1
Solyc01g016680	SL3.0ch01	21180565	21182565	+	316	67	417	42	82.507	90.85	8.34315	0.00141491	0	-3.91086	1	1
Solyc01g016690	SL3.0ch01	21247329	21249329	-	286	228	334	172	55.642	66.008	10.3659	0.00256696	0	-3.91086	1	1
Solyc01g016770	SL3.0ch01	21976695	21978695	+	1106	114	1317	59	90.656	95.712	5.05647	2.49502e-06	1.94439	-3.87079	1	1
Solyc01g016780	SL3.0ch01	21976998	21978998	+	827	89	1105	48	90.284	95.837	5.5531	4.87048e-06	0	-3.91086	1	1
Solyc01g016980	SL3.0ch01	23287111	23289111	-	483	77	515	49	86.25	91.312	5.06206	0.0172701	0	-3.91086	1	1
Solyc01g016985	SL3.0ch01	23412280	23414280	+	628	107	566	52	85.442	91.586	6.14358	0.00160659	0	-3.91086	1	1
Solyc01g017060	SL3.0ch01	23788565	23790565	-	607	2844	631	1661	17.589	27.531	9.94144	2.2263e-17	0	-3.91086	1	1
Solyc01g017070	SL3.0ch01	23789286	23791286	-	791	3771	592	2157	17.339	21.535	4.19622	5.50415e-05	0	-3.91086	1	1
Solyc01g017083	SL3.0ch01	23789404	23791404	+	747	3503	544	1971	17.576	21.63	4.05375	0.000211447	0	-3.91086	1	1
Solyc01g017100	SL3.0ch01	23793706	23795706	+	1693	15184	1564	11646	10.031	11.84	1.80811	4.151e-06	-4.61555	-3.58185	0.236379	1
Solyc01g017110	SL3.0ch01	23794404	23796404	+	1223	14006	1212	10674	8.031	10.197	2.16614	8.31539e-09	0	-3.63278	1	1
Solyc01g017120	SL3.0ch01	23797034	23799034	+	772	1393	846	798	35.658	51.46	15.8017	8.12739e-21	0	-3.91086	1	1
Solyc01g017130	SL3.0ch01	23797396	23799396	+	887	1382	1079	808	39.092	57.181	18.0886	2.12415e-29	0	-3.87249	1	1
Solyc01g017140	SL3.0ch01	23797946	23799946	+	1108	13679	1398	7703	7.493	15.361	7.86788	1.46872e-77	1.80403	-3.6634	1	1
Solyc01g017150	SL3.0ch01	23800697	23802697	+	293	443	263	202	39.81	56.559	16.7494	1.49466e-07	0	-3.91086	1	1
Solyc01g017160	SL3.0ch01	23803934	23805934	-	1420	8478	1455	4814	14.346	23.209	8.86311	1.26133e-43	0	-3.91086	1	1
Solyc01g017170	SL3.0ch01	23805191	23807191	-	1476	217	1881	194	87.183	90.651	3.46809	0.00235645	1.18361	-2.64802	0.493319	1
Solyc01g017180	SL3.0ch01	23805879	23807879	-	1372	212	1764	188	86.616	90.369	3.75269	0.00167113	0	-3.91086	1	1
Solyc01g017190	SL3.0ch01	23806285	23808285	-	1256	1212	1479	668	50.891	68.887	17.9954	1.54447e-33	0	-3.91086	1	1
Solyc01g017183	SL3.0ch01	23806630	23808630	-	951	2791	1069	1696	25.414	38.662	13.2476	4.82831e-28	-0.929644	-1.98926	0.494486	1
Solyc01g017185	SL3.0ch01	23807137	23809137	-	870	7029	921	4649	11.014	16.535	5.52096	1.07782e-18	0	-3.91086	1	1
Solyc01g017187	SL3.0ch01	23807619	23809619	-	963	7932	966	5367	10.826	15.253	4.42713	2.43965e-14	0	-3.69406	1	1
Solyc01g017200	SL3.0ch01	23805943	23807943	+	1334	207	1715	185	86.567	90.263	3.69599	0.00247206	0	-3.23557	1	1
Solyc01g017210	SL3.0ch01	23809922	23811922	-	1410	6419	1210	3934	18.01	23.523	5.51259	6.76697e-13	0	-3.8312	1	1
Solyc01g017220	SL3.0ch01	23812705	23814705	-	960	12964	863	9631	6.895	8.224	1.32918	0.000411624	-1.21908	-0.0215383	0.0523551	1
Solyc01g017230	SL3.0ch01	23810933	23812933	+	1017	23696	987	15744	4.115	5.899	1.78399	4.68582e-15	0	-3.91086	1	1
Solyc01g017235	SL3.0ch01	23814152	23816152	-	609	1027	639	792	37.225	44.654	7.42915	0.00014628	0	-3.91086	1	1
Solyc01g017240	SL3.0ch01	23814578	23816578	-	464	269	594	233	63.302	71.826	8.52438	0.00117398	0	-3.91086	1	1
Solyc01g017245	SL3.0ch01	23814842	23816842	-	461	247	613	220	65.113	73.589	8.47644	0.00125541	0	-3.91086	1	1
Solyc01g017250	SL3.0ch01	23815856	23817856	-	763	985	879	599	43.65	59.472	15.8224	1.10392e-17	0	-3.91086	1	1
Solyc01g017260	SL3.0ch01	23815770	23817770	+	722	980	861	592	42.421	59.257	16.836	1.87853e-19	-1.81381	-3.83664	1	1
Solyc01g017270	SL3.0ch01	23819470	23821470	-	712	586	479	282	54.854	62.943	8.08987	0.00126046	0	-3.91086	1	1
Solyc01g017310	SL3.0ch01	23853119	23855119	+	684	2165	785	1401	24.008	35.91	11.9019	1.95345e-18	0	-3.91086	1	1
Solyc01g017320	SL3.0ch01	23853532	23855532	+	777	2261	885	1442	25.576	38.032	12.4558	9.46798e-21	1.90137	-3.87171	1	1
Solyc01g017333	SL3.0ch01	23854293	23856293	+	680	2918	764	1796	18.899	29.844	10.9444	1.5857e-21	-1.93053	-3.83347	1	1
Solyc01g017337	SL3.0ch01	23857137	23859137	-	673	9130	611	6204	6.865	8.966	2.10027	5.36574e-06	2.53528	-3.63453	0.65113	1
Solyc01g017360	SL3.0ch01	23857490	23859490	+	741	7729	736	5272	8.749	12.25	3.50181	1.51591e-10	0	-3.91086	1	1
Solyc01g017370	SL3.0ch01	23858039	23860039	+	741	11541	849	8147	6.033	9.438	3.40431	8.90054e-19	-1.93645	-3.2165	1	1
Solyc01g017380	SL3.0ch01	23859648	23861648	+	1238	7428	1206	5308	14.286	18.514	4.22826	4.61319e-11	0	-3.79469	1	1
Solyc01g017390	SL3.0ch01	23860018	23862018	+	1189	4659	1228	2981	20.332	29.176	8.84384	1.13171e-22	0	-3.86962	1	1
Solyc01g017400	SL3.0ch01	23861079	23863079	+	878	2450	983	1534	26.382	39.054	12.6722	5.70302e-23	0.287018	0.22204	0.627214	1
Solyc01g017410	SL3.0ch01	23865798	23867798	-	995	10269	1085	7019	8.833	13.388	4.555	5.56476e-22	0	-3.91086	1	1
Solyc01g017420	SL3.0ch01	23864352	23866352	+	1384	4122	1499	2749	25.136	35.287	10.151	1.21449e-25	0	-3.661	1	1
Solyc01g017460	SL3.0ch01	23864352	23866352	+	1384	4122	1499	2749	25.136	35.287	10.151	1.21449e-25	-3.6627	-3.62037	0.39338	1
Solyc01g017430	SL3.0ch01	23866598	23868598	+	1553	11837	1558	7694	11.598	16.84	5.24139	3.52244e-27	0	-3.91086	1	1
Solyc01g017440	SL3.0ch01	23870256	23872256	-	975	5625	1323	3333	14.773	28.415	13.6422	1.6136e-66	-2.25997	-2.85883	0.480046	1
Solyc01g017450	SL3.0ch01	23870776	23872776	-	759	4859	1093	3017	13.51	26.594	13.0835	3.58468e-56	0	-3.72901	1	1
Solyc01g017470	SL3.0ch01	23869350	23871350	+	1303	8879	1443	5712	12.797	20.168	7.37062	1.85488e-36	1.90257	-3.61296	1	1
Solyc01g017480	SL3.0ch01	23872592	23874592	-	1085	1676	696	907	39.297	43.419	4.12123	0.0172828	0	-3.91086	1	1
Solyc01g017490	SL3.0ch01	23874323	23876323	-	1423	181	737	60	88.716	92.472	3.75606	0.0093679	1.89891	-3.78842	1	1
Solyc01g017485	SL3.0ch01	23880162	23882162	-	951	984	907	618	49.147	59.475	10.3281	1.69047e-08	0	-3.91086	1	1
Solyc01g017500	SL3.0ch01	23875211	23877211	+	1365	274	745	86	83.282	89.651	6.36853	8.62191e-05	0	-3.79401	1	1
Solyc01g017510	SL3.0ch01	23878625	23880625	+	982	2669	1199	1357	26.897	46.909	20.0125	1.03776e-56	0	-3.87049	1	1
Solyc01g017540	SL3.0ch01	23975487	23977487	+	585	219	661	151	72.761	81.404	8.64275	0.000191305	1.94436	-3.87079	1	1
Solyc01g017560	SL3.0ch01	24023560	24025560	+	723	77	753	44	90.375	94.479	4.1043	0.00620589	-1.88826	-3.72476	0.677343	1
Solyc01g017600	SL3.0ch01	24249508	24251508	-	94	553	181	546	14.529	24.897	10.3682	9.6388e-06	4.6697	-1.78734	0.0429705	0.950623
Solyc01g017610	SL3.0ch01	24346698	24348698	+	1082	416	1024	298	72.23	77.458	5.22876	0.00429543	0	-3.91086	1	1
Solyc01g017620	SL3.0ch01	24362071	24364071	-	1325	220	1183	73	85.761	94.188	8.42738	2.47282e-12	0	-3.91086	1	1
Solyc01g017680	SL3.0ch01	24701309	24703309	-	497	100	756	62	83.25	92.421	9.17096	9.76226e-07	0	-3.91086	1	1
Solyc01g017730	SL3.0ch01	24846709	24848709	-	608	247	613	171	71.111	78.189	7.07766	0.0035017	0.0181972	-3.09097	1	1
Solyc01g018025	SL3.0ch01	26774919	26776919	-	404	60	356	30	87.069	92.228	5.15901	0.0341722	0	-3.91086	1	1
Solyc01g020200	SL3.0ch01	27787943	27789943	+	783	6112	984	4381	11.356	18.341	6.98504	9.42385e-26	0	-3.65206	1	1
Solyc01g020220	SL3.0ch01	27847588	27849588	+	522	210	586	107	71.311	84.56	13.2484	1.94992e-08	0.636891	-1.86979	0.522456	1
Solyc01g020230	SL3.0ch01	27847886	27849886	+	535	504	558	350	51.492	61.454	9.96193	5.78579e-05	0.916153	-0.974255	0.425693	1
Solyc01g020360	SL3.0ch01	29342396	29344396	-	799	110	637	59	87.899	91.523	3.6242	0.0386187	0	-3.91086	1	1
Solyc01g020401	SL3.0ch01	30289831	30291831	+	534	386	631	319	58.043	66.421	8.37757	0.000729716	0	-3.91086	1	1
Solyc01g020404	SL3.0ch01	30324691	30326691	+	166	648	430	398	20.393	51.932	31.5392	4.13852e-39	0	-3.91086	1	1
Solyc01g020408	SL3.0ch01	30367174	30369174	+	324	57	137	8	85.039	94.483	9.44339	0.00709306	0	-3.91086	1	1
Solyc01g020430	SL3.0ch01	30369037	30371037	+	226	286	203	123	44.141	62.27	18.1293	2.36043e-06	0	-3.91086	1	1
Solyc01g020450	SL3.0ch01	30831429	30833429	-	796	490	818	291	61.897	73.76	11.8628	8.10034e-09	0	-3.91086	1	1
Solyc01g020510	SL3.0ch01	31023653	31025653	-	675	334	591	219	66.898	72.963	6.06504	0.0128256	0	-3.91086	1	1
Solyc01g021600	SL3.0ch01	31990638	31992638	+	548	788	490	568	41.018	46.314	5.29584	0.0208746	-1.53447	-2.21633	0.471945	1
Solyc01g021700	SL3.0ch01	32513522	32515522	+	769	83	943	58	90.258	94.206	3.94758	0.00426891	0	-3.91086	1	1
Solyc01g033990	SL3.0ch01	35316300	35318300	+	647	185	599	123	77.764	82.964	5.19957	0.0220429	0	-3.91086	1	1
Solyc01g034155	SL3.0ch01	36292983	36294983	-	372	573	447	484	39.365	48.013	8.64781	0.000624417	0.388213	0.968554	0.539544	1
Solyc01g028983	SL3.0ch01	39355924	39357924	-	645	247	733	185	72.309	79.847	7.53808	0.000663664	0	-3.91086	1	1
Solyc01g028960	SL3.0ch01	39355924	39357924	-	645	247	733	185	72.309	79.847	7.53808	0.000663664	0	-3.91086	1	1
Solyc01g028900	SL3.0ch01	40715764	40717764	+	457	389	725	259	54.019	73.679	19.6599	6.04382e-17	0.194432	7.43225	0.44903	1
Solyc01g028800	SL3.0ch01	41387254	41389254	+	331	99	454	95	76.977	82.696	5.71907	0.0493882	0.0178097	1.41596	0.987358	1
Solyc01g028805	SL3.0ch01	42409185	42411185	+	957	316	893	95	75.177	90.385	15.2079	7.09235e-20	0.474638	3.22533	0.436062	1
Solyc01g047597	SL3.0ch01	44915733	44917733	-	143	36	166	17	79.888	90.71	10.8221	0.0106116	-4.21937	-3.68652	0.29959	1
Solyc01g048590	SL3.0ch01	44910788	44912788	+	1081	281	993	169	79.369	85.456	6.08753	0.00030204	0.285508	0.31431	0.789565	1
Solyc01g049740	SL3.0ch01	46184034	46186034	-	637	116	570	70	84.595	89.063	4.46755	0.0329902	0	-3.91086	1	1
Solyc01g049743	SL3.0ch01	46270223	46272223	-	769	137	822	91	84.879	90.033	5.15427	0.00320889	0	-3.91086	1	1
Solyc01g049765	SL3.0ch01	46270317	46272317	+	690	136	660	86	83.535	88.472	4.93674	0.0131427	0	-3.91086	1	1
Solyc01g050010	SL3.0ch01	47692652	47694652	+	956	326	910	200	74.571	81.982	7.411	6.69335e-05	0.0628102	3.0274	0.87556	1
Solyc01g056200	SL3.0ch01	52411753	52413753	-	241	59	330	37	80.333	89.918	9.58492	0.00178071	0	-3.91086	1	1
Solyc01g056270	SL3.0ch01	52752386	52754386	-	538	140	549	69	79.351	88.835	9.48392	2.09135e-05	-1.37479	-1.81131	0.113515	1
Solyc01g056280	SL3.0ch01	52759274	52761274	-	369	1115	391	868	24.865	31.056	6.19116	0.00112592	0	-3.91086	1	1
Solyc01g056460	SL3.0ch01	54300339	54302339	+	451	64	357	30	87.573	92.248	4.67525	0.0469784	0	-3.91086	1	1
Solyc01g056480	SL3.0ch01	54395531	54397531	-	1487	190	1423	127	88.67	91.806	3.13621	0.00765366	0.693323	0.564825	0.279844	1
Solyc01g056660	SL3.0ch01	55521664	55523664	-	783	305	708	175	71.967	80.181	8.21429	0.000114541	0	-3.91086	1	1
Solyc01g056670	SL3.0ch01	55569743	55571743	+	376	189	362	112	66.549	76.371	9.82264	0.0018838	1.90153	-3.72002	1	1
Solyc01g056720	SL3.0ch01	56283964	56285964	-	2425	830	2157	534	74.501	80.156	5.65531	1.72081e-06	0.0738072	4.2251	0.819841	1
Solyc01g056880	SL3.0ch01	57370151	57372151	+	728	258	833	71	73.834	92.146	18.3123	4.45797e-25	0	-3.91086	1	1
Solyc01g056887	SL3.0ch01	57391115	57393115	-	747	81	870	55	90.217	94.054	3.83666	0.00775089	0	-3.91086	1	1
Solyc01g056915	SL3.0ch01	57493467	57495467	-	236	51	319	41	82.23	88.611	6.38115	0.0416096	0	-3.91086	1	1
Solyc01g057000	SL3.0ch01	57888469	57890469	+	1265	423	1116	285	74.941	79.657	4.71663	0.00528801	0.401814	9.64771	0.287787	1
Solyc01g057010	SL3.0ch01	57923459	57925459	+	1028	401	1300	252	71.938	83.763	11.8245	1.47999e-13	0	-3.91086	1	1
Solyc01g057100	SL3.0ch01	58370192	58372192	-	1035	292	853	156	77.995	84.539	6.54367	0.000288751	0	-3.91086	1	1
Solyc01g057130	SL3.0ch01	59051428	59053428	+	2017	169	1749	106	92.269	94.286	2.01673	0.0242632	0	-3.91086	1	1
Solyc01g057150	SL3.0ch01	59347713	59349713	-	77	978	98	782	7.299	11.136	3.83779	0.00980036	-4.87167	-3.47195	0.189015	1
Solyc01g057175	SL3.0ch01	59422250	59424250	+	48	285	73	188	14.414	27.969	13.5549	0.000250623	0	-3.87342	1	1
Solyc01g057190	SL3.0ch01	59684761	59686761	-	290	327	338	225	47.002	60.036	13.0339	4.76237e-05	0	-3.91086	1	1
Solyc01g057260	SL3.0ch01	60236776	60238776	+	708	255	666	170	73.52	79.665	6.14482	0.00587057	0.800647	-0.431702	0.422885	1
Solyc01g057370	SL3.0ch01	60767831	60769831	-	1451	480	1240	265	75.142	82.392	7.24961	2.07914e-06	0	-3.91086	1	1
Solyc01g057390	SL3.0ch01	60813726	60815726	-	732	171	794	58	81.063	93.192	12.1294	4.61292e-13	0	-3.91086	1	1
Solyc01g057410	SL3.0ch01	60857504	60859504	-	191	210	237	171	47.631	58.088	10.4573	0.00779376	0	-3.91086	1	1
Solyc01g057440	SL3.0ch01	60917137	60919137	-	1063	229	932	148	82.276	86.296	4.02075	0.0173039	0.503926	1.34169	0.386438	1
Solyc01g057520	SL3.0ch01	61249164	61251164	+	874	587	812	431	59.822	65.326	5.50378	0.00891474	-0.134073	4.9295	0.699803	1
Solyc01g057590	SL3.0ch01	62776747	62778747	+	194	339	142	138	36.398	50.714	14.3165	0.000391138	0	-3.91086	1	1
Solyc01g057640	SL3.0ch01	63038158	63040158	+	994	174	874	72	85.103	92.389	7.28627	1.39993e-06	0	-3.91086	1	1
Solyc01g057700	SL3.0ch01	63475636	63477636	-	596	79	620	42	88.296	93.656	5.35929	0.00243015	0	-3.75208	1	1
Solyc01g057773	SL3.0ch01	63676142	63678142	+	267	151	302	91	63.876	76.845	12.9692	0.00027055	0	-3.91086	1	1
Solyc01g057800	SL3.0ch01	63899935	63901935	-	393	74	386	40	84.154	90.61	6.45615	0.0112068	0	-3.91086	1	1
Solyc01g058050	SL3.0ch01	64988291	64990291	-	503	51	641	36	90.794	94.682	3.8882	0.0205683	0	-3.91086	1	1
Solyc01g058100	SL3.0ch01	65142388	65144388	-	136	822	178	702	14.196	20.227	6.03103	0.00202748	0.318272	-3.08316	0.9296	1
Solyc01g058220	SL3.0ch01	65597632	65599632	-	142	143	249	134	49.825	65.013	15.1885	0.00039864	0.615882	-3.42015	1	1
Solyc01g058420	SL3.0ch01	66429522	66431522	+	787	331	781	207	70.394	79.049	8.65502	3.57102e-05	0	-3.91086	1	1
Solyc01g058460	SL3.0ch01	66622794	66624794	+	697	816	708	454	46.067	60.929	14.862	4.96214e-13	0	-3.91086	1	1
Solyc01g058510	SL3.0ch01	66785932	66787932	-	961	398	602	124	70.714	82.92	12.2064	5.77581e-09	1.78818	-3.87428	1	1
Solyc01g058720	SL3.0ch01	67920333	67922333	-	1143	605	1136	390	65.389	74.443	9.05397	1.92091e-07	1.50813	3.83673	0.11472	1
Solyc01g058730	SL3.0ch01	67948782	67950782	-	581	754	499	528	43.521	48.588	5.06752	0.0299886	0.0929807	6.24769	0.710952	1
Solyc01g059740	SL3.0ch01	68211334	68213334	-	767	99	780	67	88.568	92.09	3.5216	0.0277634	0	-3.91086	1	1
Solyc01g059800	SL3.0ch01	68413223	68415223	+	257	562	306	468	31.38	39.535	8.15515	0.00241585	4.63937	-3.49467	0.280831	1
Solyc01g059886	SL3.0ch01	69039130	69041130	+	718	239	602	57	75.026	91.351	16.3244	1.81919e-16	0	-3.91086	1	1
Solyc01g059960	SL3.0ch01	69298312	69300312	+	653	85	670	27	88.482	96.126	7.64387	3.45114e-07	0	-3.87249	1	1
Solyc01g060043	SL3.0ch01	69410727	69412727	+	766	61	681	30	92.624	95.781	3.15665	0.0194027	0	-3.91086	1	1
Solyc01g060130	SL3.0ch01	69610434	69612434	+	1034	156	946	104	86.891	90.095	3.20448	0.0373889	0.126545	4.78419	0.668529	1
Solyc01g060200	SL3.0ch01	69724450	69726450	-	596	240	504	148	71.292	77.301	6.00875	0.0188464	5.39535	-3.09027	0.0184366	0.651986
Solyc01g060210	SL3.0ch01	69737200	69739200	-	204	27	115	3	88.312	97.458	9.14594	0.00951415	-0.999035	0.0607125	0.279934	1
Solyc01g060245	SL3.0ch01	69902900	69904900	+	1259	215	947	90	85.414	91.321	5.90728	4.01745e-05	0.314433	1.70084	0.631393	1
Solyc01g060250	SL3.0ch01	69902922	69904922	+	1259	215	947	90	85.414	91.321	5.90728	4.01745e-05	-0.195523	-1.24909	0.82787	1
Solyc01g060460	SL3.0ch01	70968120	70970120	-	557	453	619	380	55.149	61.962	6.81345	0.00554234	0	-3.5747	1	1
Solyc01g060490	SL3.0ch01	71209161	71211161	+	124	251	171	174	33.067	49.565	16.4986	4.11485e-05	-0.670396	-1.09607	0.560585	1
Solyc01g065560	SL3.0ch01	71710547	71712547	-	408	195	516	182	67.662	73.926	6.26381	0.0276579	-0.0546323	3.34828	0.895427	1
Solyc01g065577	SL3.0ch01	71762126	71764126	+	1018	546	913	388	65.09	70.177	5.08727	0.00957439	1.51948	-3.53375	0.58215	1
Solyc01g065645	SL3.0ch01	72037969	72039969	+	874	87	1070	70	90.947	93.86	2.91272	0.0248087	2.77749	-3.67781	0.690275	1
Solyc01g065800	SL3.0ch01	72216307	72218307	+	1503	153	1047	67	90.761	93.986	3.22477	0.00543965	0	-3.91086	1	1
Solyc01g065985	SL3.0ch01	72639765	72641765	-	1233	128	1329	84	90.595	94.055	3.46005	0.00232044	0	-3.91086	1	1
Solyc01g066050	SL3.0ch01	72803199	72805199	-	887	323	924	261	73.306	77.975	4.6689	0.0187326	0.047956	6.58437	0.860271	1
Solyc01g066110	SL3.0ch01	72927437	72929437	-	571	121	640	67	82.514	90.523	8.00889	7.3559e-05	0	-3.58435	1	1
Solyc01g066290	SL3.0ch01	73726899	73728899	-	526	305	578	265	63.297	68.565	5.26742	0.0414299	0.0731648	-0.199408	0.968672	1
Solyc01g066320	SL3.0ch01	73866162	73868162	+	1164	106	913	51	91.654	94.71	3.056	0.0129863	0	-3.91086	1	1
Solyc01g066340	SL3.0ch01	73944125	73946125	-	72	43	41	6	62.609	87.234	24.6253	0.00602049	0.371836	2.46789	0.406616	1
Solyc01g066380	SL3.0ch01	74055611	74057611	+	663	114	600	48	85.328	92.593	7.26441	8.40966e-05	0	-3.91086	1	1
Solyc01g066457	SL3.0ch01	74287608	74289608	+	359	113	433	56	76.059	88.548	12.4887	3.29415e-06	-0.478753	2.96512	0.620824	1
Solyc01g066515	SL3.0ch01	74314919	74316919	-	698	387	656	233	64.332	73.791	9.45898	3.95764e-05	3.66173	-3.70458	0.412105	1
Solyc01g066560	SL3.0ch01	74422357	74424357	+	47	150	74	118	23.858	38.542	14.6838	0.00565722	-0.641096	-0.652705	0.469924	1
Solyc01g066620	SL3.0ch01	74570166	74572166	+	767	286	746	159	72.84	82.431	9.59143	3.28107e-06	-0.0277208	1.53354	0.969819	1
Solyc01g066640	SL3.0ch01	74647198	74649198	+	588	380	722	243	60.744	74.819	14.0749	4.90764e-10	-0.069928	3.66876	0.883355	1
Solyc01g066720	SL3.0ch01	74689353	74691353	-	1551	340	1246	215	82.02	85.284	3.26396	0.0256696	0.709635	8.34679	0.0242266	0.737477
Solyc01g066750	SL3.0ch01	74733378	74735378	+	664	242	832	43	73.289	95.086	21.7965	8.63766e-37	0	-3.91086	1	1
Solyc01g066770	SL3.0ch01	74767816	74769816	-	1305	631	1307	303	67.407	81.18	13.7731	3.66344e-19	-0.335356	4.85038	0.275794	1
Solyc01g066880	SL3.0ch01	74937288	74939288	-	210	307	414	135	40.619	75.41	34.7909	2.44169e-29	0.440182	2.52977	0.432296	1
Solyc01g067090	SL3.0ch01	75249155	75251155	-	472	901	825	577	34.377	58.845	24.4672	2.26292e-36	-0.72017	5.57116	0.110856	1
Solyc01g067150	SL3.0ch01	75371250	75373250	+	770	109	713	65	87.6	91.645	4.0457	0.0172276	0	-3.86778	1	1
Solyc01g067170	SL3.0ch01	75390315	75392315	+	245	94	164	26	72.271	86.316	14.0444	0.00078424	-1.37299	-2.78313	0.435523	1
Solyc01g067270	SL3.0ch01	75473381	75475381	+	1001	54	941	28	94.882	97.11	2.22891	0.0252616	0	-3.91086	1	1
Solyc01g067273	SL3.0ch01	75473381	75475381	+	1001	54	941	28	94.882	97.11	2.22891	0.0252616	0.390946	1.86133	0.459414	1
Solyc01g067275	SL3.0ch01	75473901	75475901	+	1002	213	944	114	82.469	89.225	6.75582	2.8027e-05	0	-3.91086	1	1
Solyc01g067277	SL3.0ch01	75488000	75490000	+	131	22	128	3	85.621	97.71	12.089	0.000882905	0	-3.91086	1	1
Solyc01g067300	SL3.0ch01	75539137	75541137	-	1533	469	1495	366	76.573	80.333	3.75973	0.0113439	0.910878	4.95438	0.141783	1
Solyc01g067390	SL3.0ch01	75677303	75679303	+	530	391	490	208	57.546	70.201	12.6544	1.49839e-06	0.218992	7.03044	0.443153	1
Solyc01g067490	SL3.0ch01	76018480	76020480	-	1329	183	1067	107	87.897	90.886	2.98903	0.027984	0.250813	4.31235	0.377301	1
Solyc01g067540	SL3.0ch01	76108353	76110353	+	584	308	682	237	65.471	74.211	8.74025	0.000226807	3.37048	-3.77034	0.530692	1
Solyc01g067580	SL3.0ch01	76198787	76200787	-	431	249	569	250	63.382	69.475	6.09262	0.0261556	-0.23921	3.15088	0.51528	1
Solyc01g067740	SL3.0ch01	76491969	76493969	+	1356	533	1343	428	71.784	75.833	4.04885	0.0124873	0.0548423	10.4036	0.851896	1
Solyc09g064400	SL3.0ch01	76555244	76557244	-	868	105	1058	72	89.209	93.628	4.41969	0.00100675	-0.943093	-3.64057	1	1
Solyc01g067770	SL3.0ch01	76553547	76555547	+	666	1794	1037	1399	27.073	42.57	15.4966	2.9669e-28	0	-3.91086	1	1
Solyc01g067820	SL3.0ch01	76608288	76610288	+	874	42	810	20	95.415	97.59	2.17551	0.0352475	0.131623	3.75198	0.688139	1
Solyc01g067840	SL3.0ch01	76619068	76621068	+	303	277	403	156	52.241	72.093	19.8516	7.50898e-11	-4.7301	-3.57274	0.0892926	1
Solyc01g067900	SL3.0ch01	76732168	76734168	+	724	160	645	105	81.9	86	4.09955	0.0455936	-0.318642	6.03905	0.463765	1
Solyc01g068030	SL3.0ch01	76880555	76882555	-	10	610	57	563	1.613	9.194	7.58065	1.81746e-08	-0.381707	4.6052	0.234215	1
Solyc01g068040	SL3.0ch01	76879799	76881799	+	16	1033	72	986	1.525	6.805	5.28003	7.03322e-09	1.78819	-3.87428	1	1
Solyc01g068050	SL3.0ch01	76887992	76889992	+	3100	431	2522	293	87.794	89.591	1.79765	0.0452553	-0.0347165	3.34262	0.923893	1
Solyc01g068060	SL3.0ch01	76896975	76898975	-	268	25	318	11	91.468	96.657	5.18896	0.0135277	-0.176732	4.57605	0.576649	1
Solyc01g068110	SL3.0ch01	77045101	77047101	-	67	58	120	30	53.6	80	26.4	2.58294e-05	0	-3.91086	1	1
Solyc01g068240	SL3.0ch01	77162156	77164156	+	1403	187	1287	124	88.239	91.212	2.97291	0.0176716	-0.0598666	5.23056	0.824784	1
Solyc01g068280	SL3.0ch01	77238224	77240224	-	1346	260	1311	202	83.811	86.649	2.83833	0.0459177	-0.591288	3.42186	0.175539	1
Solyc01g068300	SL3.0ch01	77313140	77315140	-	469	55	413	24	89.504	94.508	5.00419	0.0142926	2.70461	-3.83362	0.671608	1
Solyc01g068370	SL3.0ch01	77392586	77394586	-	856	512	977	489	62.573	66.644	4.07083	0.0437469	0.556882	1.84249	0.279235	1
Solyc01g068410	SL3.0ch01	77476855	77478855	+	452	949	542	639	32.263	45.893	13.6306	2.58737e-11	-3.76185	-2.52839	0.0378511	0.904612
Solyc01g068560	SL3.0ch01	77589204	77591204	-	1316	884	1149	502	59.818	69.594	9.776	5.19807e-09	-1.49833	1.92278	0.00154436	0.147101
Solyc01g068580	SL3.0ch01	77596655	77598655	+	1712	501	2140	272	77.361	88.723	11.362	1.74563e-23	-0.00615525	5.06387	0.982664	1
Solyc01g079130	SL3.0ch01	78066845	78068845	+	577	581	577	458	49.827	55.749	5.9215	0.0137854	1.78817	-3.87428	1	1
Solyc01g079150	SL3.0ch01	78102435	78104435	-	1111	1044	972	750	51.555	56.446	4.89147	0.00665419	-1.27358	2.65721	0.0684307	1
Solyc01g079430	SL3.0ch01	78361789	78363789	-	41	663	61	576	5.824	9.576	3.75227	0.0207814	-0.157609	1.09774	0.798549	1
Solyc01g079450	SL3.0ch01	78373913	78375913	-	789	131	728	67	85.761	91.572	5.81146	0.000717225	-0.150421	6.94205	0.621383	1
Solyc01g079530	SL3.0ch01	78454782	78456782	-	886	1064	872	791	45.436	52.435	6.99946	0.000139972	-1.11854	1.29405	0.202634	1
Solyc01g079570	SL3.0ch01	78499014	78501014	+	595	711	524	402	45.559	56.587	11.0285	2.30567e-06	-0.759088	-2.28626	0.656146	1
Solyc01g079740	SL3.0ch01	78732540	78734540	+	653	1010	659	810	39.266	44.86	5.59406	0.00445557	0.403539	-0.425764	0.712506	1
Solyc01g079980	SL3.0ch01	78976889	78978889	-	566	367	644	312	60.665	67.364	6.69949	0.00655216	-1.49992	-3.70104	0.658168	1
Solyc01g080010	SL3.0ch01	78995300	78997300	-	220	728	247	622	23.207	28.423	5.21672	0.0234047	-1.27545	5.42128	0.152474	1
Solyc01g080020	SL3.0ch01	79002938	79004938	-	1273	824	1266	650	60.706	66.075	5.36939	0.00150098	-2.04508	5.74884	4.42576e-06	0.00152212
Solyc01g080040	SL3.0ch01	79009724	79011724	+	308	865	240	513	26.257	31.873	5.61505	0.0177998	0.192887	3.75807	0.605751	1
Solyc01g080190	SL3.0ch01	79255398	79257398	+	43	196	102	217	17.992	31.975	13.9833	0.000742909	0	-3.91086	1	1
Solyc01g080240	SL3.0ch01	79313065	79315065	+	177	366	197	290	32.597	40.452	7.85506	0.0198582	-0.200291	6.1448	0.444779	1
Solyc01g080340	SL3.0ch01	79416384	79418384	-	458	876	541	858	34.333	38.67	4.33765	0.0352677	0.219473	4.06039	0.520352	1
Solyc01g080410	SL3.0ch01	79506887	79508887	+	354	559	416	448	38.773	48.148	9.37487	0.000298102	0.0349066	8.22478	0.94243	1
Solyc01g080440	SL3.0ch01	79540068	79542068	-	773	344	941	221	69.203	80.981	11.7778	1.00506e-09	0	-3.91086	1	1
Solyc01g080450	SL3.0ch01	79546107	79548107	-	705	730	649	500	49.129	56.484	7.35498	0.000823474	-0.102696	4.11805	0.751339	1
Solyc01g080540	SL3.0ch01	79640916	79642916	+	375	532	450	456	41.345	49.669	8.32378	0.00136103	0.0273593	3.94673	0.953568	1
Solyc01g080850	SL3.0ch01	80004889	80006889	-	1314	342	1477	298	79.348	83.211	3.86344	0.00924962	-0.0960646	6.18684	0.738846	1
Solyc01g080960	SL3.0ch01	80150343	80152343	-	1023	352	830	227	74.4	78.524	4.12412	0.0345792	0	-3.79751	1	1
Solyc01g080980	SL3.0ch01	80166448	80168448	+	895	750	901	586	54.407	60.592	6.1845	0.00167599	0	-3.91086	1	1
Solyc01g080990	SL3.0ch01	80166796	80168796	+	948	870	950	655	52.145	59.19	7.04482	0.000163584	-1.23315	-1.88503	0.482796	1
Solyc01g081010	SL3.0ch01	80177540	80179540	-	560	435	715	249	56.281	74.17	17.8887	2.25196e-15	0.189955	9.5228	0.478331	1
Solyc01g081030	SL3.0ch01	80193532	80195532	-	1857	391	1869	241	82.607	88.578	5.97144	1.8925e-07	0.000890227	5.90758	0.998234	1
Solyc01g081070	SL3.0ch01	80248901	80250901	+	1423	492	1403	327	74.308	81.098	6.79017	6.59046e-06	0.133612	6.28844	0.657573	1
Solyc01g081115	SL3.0ch01	80304162	80306162	-	213	189	172	103	52.985	62.545	9.56038	0.027962	-0.263946	-1.13945	0.788643	1
Solyc01g081160	SL3.0ch01	80325475	80327475	-	120	131	188	71	47.809	72.587	24.7781	1.03223e-07	-0.726133	0.0753379	0.441763	1
Solyc01g081190	SL3.0ch01	80336055	80338055	+	780	359	859	299	68.481	74.18	5.6985	0.00692133	0.202556	1.53734	0.680738	1
Solyc01g081250	SL3.0ch01	80363912	80365912	+	1051	265	1045	198	79.863	84.071	4.20757	0.0144144	-0.923224	-0.648894	0.263737	1
Solyc01g081270	SL3.0ch01	80368863	80370863	+	86	572	89	408	13.07	17.907	4.83754	0.0441416	0.777676	3.87238	0.224948	1
Solyc01g081280	SL3.0ch01	80372671	80374671	+	177	321	240	227	35.542	51.392	15.8497	5.14242e-06	-0.418764	-3.38949	1	1
Solyc01g081320	SL3.0ch01	80400875	80402875	-	149	153	133	87	49.338	60.455	11.1168	0.0254917	1.94435	-3.87079	1	1
Solyc01g073670	SL3.0ch01	80930440	80932440	-	930	280	970	170	76.86	85.088	8.22822	3.18442e-06	-1.7264	-1.35731	0.37498	1
Solyc01g073680	SL3.0ch01	80932632	80934632	-	1131	505	1108	323	69.132	77.428	8.29634	2.02181e-06	-0.778645	1.15461	0.312962	1
Solyc01g073690	SL3.0ch01	80940404	80942404	-	155	9	276	3	94.512	98.925	4.41254	0.0231008	-0.222027	7.31667	0.405091	1
Solyc01g073695	SL3.0ch01	80952515	80954515	+	513	645	539	516	44.301	51.09	6.78953	0.004483	0	-3.91086	1	1
Solyc01g073745	SL3.0ch01	81000490	81002490	+	489	597	590	595	45.028	49.789	4.76141	0.044885	0	-3.82946	1	1
Solyc01g073840	SL3.0ch01	81069641	81071641	-	365	389	519	282	48.408	64.794	16.3855	1.01731e-09	0.534676	-3.0414	0.877559	1
Solyc01g086680	SL3.0ch01	81516595	81518595	+	477	803	551	688	37.266	44.471	7.20572	0.000935238	4.02597	4.58389	0.0037698	0.263871
Solyc01g086690	SL3.0ch01	81526401	81528401	-	822	326	857	262	71.603	76.586	4.98345	0.0159618	-0.23397	0.615153	0.80686	1
Solyc01g086810	SL3.0ch01	81631138	81633138	-	122	616	148	552	16.531	21.143	4.61169	0.0451034	-0.050923	4.78978	0.873492	1
Solyc01g086820	SL3.0ch01	81640254	81642254	-	929	644	708	360	59.059	66.292	7.23301	0.000651013	0.027973	3.55612	0.968426	1
Solyc01g086830	SL3.0ch01	81639281	81641281	+	165	463	136	254	26.274	34.872	8.59791	0.00923121	0	-3.91086	1	1
Solyc01g086840	SL3.0ch01	81639281	81641281	+	165	463	136	254	26.274	34.872	8.59791	0.00923121	0	-3.83245	1	1
Solyc01g086930	SL3.0ch01	81714878	81716878	-	1990	1885	1766	1085	51.355	61.943	10.5883	1.50783e-16	-0.498849	1.01145	0.498674	1
Solyc01g086925	SL3.0ch01	81703591	81705591	-	1400	831	1156	555	62.752	67.563	4.8107	0.00481344	0	-3.91086	1	1
Solyc01g087000	SL3.0ch01	81805187	81807187	-	1	85	52	71	1.163	42.276	41.1136	2.73108e-12	1.0663	-0.780666	0.289609	1
Solyc01g087035	SL3.0ch01	81830256	81832256	-	1228	498	1234	338	71.147	78.499	7.35157	7.99598e-06	0.544244	0.150506	0.47496	1
Solyc01g087230	SL3.0ch01	82026351	82028351	+	820	108	686	55	88.362	92.578	4.21553	0.0109675	0.270433	3.6902	0.398951	1
Solyc01g087235	SL3.0ch01	82026474	82028474	+	820	269	688	116	75.298	85.572	10.2737	3.17014e-07	-4.38557	-2.80087	0.171493	1
Solyc01g087410	SL3.0ch01	82245870	82247870	-	76	239	107	171	24.127	38.489	14.3622	0.00067509	0.189564	2.0299	0.760911	1
Solyc01g087480	SL3.0ch01	82309816	82311816	+	602	9486	576	5763	5.967	9.087	3.11912	1.87913e-12	0	-3.82514	1	1
Solyc01g087570	SL3.0ch01	82397495	82399495	-	135	630	177	453	17.647	28.095	10.4482	2.46544e-05	1.97859	-3.44605	0.389622	1
Solyc01g087630	SL3.0ch01	82459189	82461189	-	48	58	131	43	45.283	75.287	30.0043	5.53715e-06	-1.81046	-3.83164	1	1
Solyc01g087670	SL3.0ch01	82481832	82483832	-	1147	475	1079	299	70.715	78.302	7.58672	1.35296e-05	0.0534413	5.48581	0.840083	1
Solyc01g087680	SL3.0ch01	82483233	82485233	+	1530	686	1340	512	69.043	72.354	3.31089	0.0403688	-0.240378	5.482	0.415439	1
Solyc01g087800	SL3.0ch01	82564988	82566988	+	0	10	23	2	0	92	92	2.63447e-06	-0.51988	0.756265	0.616705	1
Solyc01g087960	SL3.0ch01	82680379	82682379	-	1236	1510	1136	910	45.011	55.523	10.512	1.16196e-11	0	-3.91086	1	1
Solyc01g087980	SL3.0ch01	82701703	82703703	+	808	664	760	487	54.891	60.946	6.05497	0.0044667	-0.213662	-1.00325	0.845091	1
Solyc01g088080	SL3.0ch01	82790937	82792937	+	2042	394	1890	296	83.826	86.459	2.63334	0.0258594	-0.0105483	6.60394	0.968996	1
Solyc01g088110	SL3.0ch01	82855388	82857388	+	638	966	687	844	39.776	44.873	5.09707	0.0102188	0	-3.91086	1	1
Solyc01g088245	SL3.0ch01	82928862	82930862	+	594	429	636	198	58.065	76.259	18.1945	3.33633e-15	0.173796	4.8708	0.612231	1
Solyc01g088260	SL3.0ch01	82944190	82946190	-	456	63	461	27	87.861	94.467	6.60594	0.000867856	0	-3.91086	1	1
Solyc01g088270	SL3.0ch01	82944625	82946625	-	531	292	548	165	64.52	76.858	12.3383	1.07973e-06	0	-3.86778	1	1
Solyc01g088290	SL3.0ch01	82953091	82955091	-	792	261	822	192	75.214	81.065	5.85141	0.00400033	0	-3.91086	1	1
Solyc01g088300	SL3.0ch01	82957088	82959088	-	774	740	946	485	51.123	66.108	14.9848	4.30201e-15	0	-3.87283	1	1
Solyc01g088310	SL3.0ch01	82955838	82957838	+	260	597	366	339	30.338	51.915	21.5765	1.55716e-16	-0.22679	4.08176	0.519835	1
Solyc01g088410	SL3.0ch01	83084769	83086769	+	1770	303	1430	178	85.384	88.93	3.54685	0.00444153	0	-3.91086	1	1
Solyc01g088480	SL3.0ch01	83142965	83144965	-	0	172	3	50	0	5.66	5.66038	0.0249513	0.00660332	5.09627	0.987587	1
Solyc01g088530	SL3.0ch01	83175254	83177254	+	271	673	365	598	28.708	37.902	9.19476	0.000112926	0.346974	0.703367	0.652185	1
Solyc01g088540	SL3.0ch01	83199081	83201081	+	175	655	254	639	21.084	28.443	7.35911	0.00146905	0	-3.91086	1	1
Solyc01g088580	SL3.0ch01	83222709	83224709	+	565	1015	527	749	35.759	41.301	5.54145	0.00656341	0	-3.91086	1	1
Solyc01g088620	SL3.0ch01	83245499	83247499	+	25	78	40	40	24.272	50	25.7282	0.00122602	-0.841569	0.75636	0.424429	1
Solyc01g088690	SL3.0ch01	83313522	83315522	-	628	785	723	765	44.444	48.589	4.14427	0.044563	0.17523	2.82651	0.716278	1
Solyc01g088700	SL3.0ch01	83327434	83329434	-	1135	763	1245	519	59.8	70.578	10.7784	1.28201e-10	0.311633	7.38163	0.323842	1
Solyc01g088770	SL3.0ch01	83394716	83396716	-	1676	337	1928	303	83.259	86.419	3.15983	0.0107755	0	-3.91086	1	1
Solyc01g088780	SL3.0ch01	83394736	83396736	+	1676	337	1928	303	83.259	86.419	3.15983	0.0107755	-2.56906	-2.46677	0.130801	1
Solyc01g088800	SL3.0ch01	83394736	83396736	+	1676	337	1928	303	83.259	86.419	3.15983	0.0107755	0.525654	5.40722	0.145835	1
Solyc01g089855	SL3.0ch01	83469856	83471856	-	2	19	47	21	9.524	69.118	59.5938	9.81502e-06	0	-3.76702	1	1
Solyc01g089870	SL3.0ch01	83473377	83475377	-	305	340	298	198	47.287	60.081	12.7938	0.000103199	-0.581875	4.92363	0.101173	1
Solyc01g089907	SL3.0ch01	83493671	83495671	-	1034	307	1059	213	77.107	83.255	6.14808	0.000358093	1.09612	0.721924	0.0901923	1
Solyc01g089920	SL3.0ch01	83503274	83505274	+	213	251	132	107	45.905	55.23	9.32495	0.0379327	1.78816	-3.87428	1	1
Solyc01g089970	SL3.0ch01	83558253	83560253	+	1238	404	1302	318	75.396	80.37	4.97451	0.00201618	0.2506	8.72982	0.411836	1
Solyc01g089980	SL3.0ch01	83569699	83571699	-	619	841	612	698	42.397	46.718	4.3203	0.0421646	-0.525158	5.58716	0.0757929	1
Solyc01g090050	SL3.0ch01	83615868	83617868	-	6	195	57	143	2.985	28.5	25.5149	3.35353e-12	4.94603	-3.16715	0.138877	1
Solyc01g090070	SL3.0ch01	83615868	83617868	-	6	195	57	143	2.985	28.5	25.5149	3.35353e-12	0	-3.91086	1	1
Solyc01g090080	SL3.0ch01	83619330	83621330	-	196	131	82	31	59.939	72.566	12.6275	0.033009	3.29927	-3.79381	0.529151	1
Solyc01g090090	SL3.0ch01	83622794	83624794	-	380	171	385	113	68.966	77.309	8.34372	0.00703545	0	-3.87049	1	1
Solyc01g090110	SL3.0ch01	83633970	83635970	-	510	542	572	337	48.479	62.926	14.4472	2.26314e-09	1.98554	-3.03987	0.457451	1
Solyc01g090130	SL3.0ch01	83642192	83644192	-	541	650	539	532	45.424	50.327	4.90278	0.0372294	1.60596	-3.65554	0.577045	1
Solyc01g090170	SL3.0ch01	83663698	83665698	+	225	988	210	614	18.549	25.485	6.93638	0.000800185	0.0017236	6.18382	0.99572	1
Solyc01g090320	SL3.0ch01	83853066	83855066	-	951	576	1129	412	62.279	73.264	10.9851	1.11112e-09	1.23331	-2.94217	0.731944	1
Solyc01g090400	SL3.0ch01	83959048	83961048	+	20	45	89	31	30.769	74.167	43.3974	1.95555e-07	0.156627	0.953671	0.777151	1
Solyc01g090430	SL3.0ch01	83994206	83996206	+	2513	492	2043	288	83.627	87.645	4.0175	0.000182141	0.498213	3.65123	0.245314	1
Solyc01g090530	SL3.0ch01	84068370	84070370	+	771	697	856	526	52.52	61.939	9.41878	2.82658e-06	0.59649	-1.23574	0.641369	1
Solyc01g090600	SL3.0ch01	84146352	84148352	-	782	578	846	523	57.5	61.797	4.29693	0.0418154	0	-3.91086	1	1
Solyc01g090630	SL3.0ch01	84156428	84158428	+	653	493	655	407	56.981	61.676	4.69528	0.0466528	-3.22239	-3.26279	0.376494	1
Solyc01g090910	SL3.0ch01	84490320	84492320	+	100	541	134	378	15.601	26.172	10.5713	6.56918e-05	0.190349	3.97156	0.666051	1
Solyc01g090960	SL3.0ch01	84546507	84548507	+	509	562	521	398	47.526	56.692	9.16638	0.00022423	0	-3.91086	1	1
Solyc01g091030	SL3.0ch01	84620756	84622756	+	451	1286	403	958	25.964	29.611	3.64627	0.0450178	0.76482	0.341311	0.378991	1
Solyc01g091180	SL3.0ch01	84743903	84745903	-	467	804	444	604	36.743	42.366	5.62369	0.014061	-0.0185123	-2.58308	1	1
Solyc01g091210	SL3.0ch01	84772551	84774551	-	97	323	193	341	23.095	36.142	13.0471	7.43796e-05	0.213447	4.72372	0.479842	1
Solyc01g091330	SL3.0ch01	84857916	84859916	-	206	467	260	385	30.609	40.31	9.70087	0.000989118	-1.7208	-1.11442	0.193331	1
Solyc01g091340	SL3.0ch01	84856729	84858729	+	200	542	260	536	26.954	32.663	5.70914	0.0313808	0.710961	2.72733	0.154481	1
Solyc01g091370	SL3.0ch01	84882234	84884234	-	342	1064	447	883	24.324	33.609	9.2847	8.17404e-07	0.359837	1.99081	0.746574	1
Solyc01g091380	SL3.0ch01	84898148	84900148	-	7243	283	7083	213	96.24	97.081	0.84089	0.0108487	-0.250963	1.88946	0.625677	1
Solyc01g091470	SL3.0ch01	84973514	84975514	+	214	758	317	668	22.016	32.183	10.1663	3.29544e-06	0.237883	-1.1827	0.88266	1
Solyc01g091500	SL3.0ch01	85007901	85009901	-	322	476	440	299	40.351	59.54	19.189	1.10236e-12	0.0177085	3.68408	0.963433	1
Solyc01g091560	SL3.0ch01	85043236	85045236	+	82	72	31	10	53.247	75.61	22.363	0.0246181	0.116403	-2.91275	1	1
Solyc01g091590	SL3.0ch01	85056372	85058372	+	97	803	134	674	10.778	16.584	5.80638	0.00164876	0	-3.91086	1	1
Solyc01g091750	SL3.0ch01	85215645	85217645	-	511	453	536	343	53.008	60.978	7.97009	0.00189156	0.391068	5.00782	0.16437	1
Solyc01g091930	SL3.0ch01	85344146	85346146	-	54	196	93	207	21.6	31	9.4	0.0296542	-0.379358	-2.52166	0.905824	1
Solyc01g091940	SL3.0ch01	85344154	85346154	+	54	207	93	225	20.69	29.245	8.55563	0.038295	0.0616399	3.28159	0.875018	1
Solyc01g091950	SL3.0ch01	85354994	85356994	+	866	1053	807	794	45.128	50.406	5.27833	0.00498479	0.396934	5.51009	0.31021	1
Solyc01g093970	SL3.0ch01	85420538	85422538	+	721	1752	700	1400	29.155	33.333	4.17846	0.00666142	0.0880188	5.20481	0.783704	1
Solyc01g094040	SL3.0ch01	85489626	85491626	-	1940	511	1913	395	79.151	82.886	3.73425	0.00334111	0.548557	5.78211	0.132834	1
Solyc01g094190	SL3.0ch01	85626026	85628026	+	77	104	58	40	42.541	59.184	16.6422	0.0183648	-0.273025	3.16365	0.482361	1
Solyc01g094380	SL3.0ch01	85766259	85768259	+	1515	1443	1331	900	51.217	59.659	8.44231	1.83035e-08	0	-3.17729	1	1
Solyc01g094420	SL3.0ch01	85790134	85792134	+	430	495	562	469	46.486	54.51	8.0237	0.00138508	0.0638404	4.75164	0.846516	1
Solyc01g094450	SL3.0ch01	85798492	85800492	+	13	33	26	2	28.261	92.857	64.5963	3.03689e-07	0	-3.91086	1	1
Solyc01g094640	SL3.0ch01	85958267	85960267	-	969	487	959	384	66.552	71.407	4.8551	0.0139123	1.28364	-0.719332	0.251173	1
Solyc01g094670	SL3.0ch01	85991165	85993165	-	1329	269	1044	145	83.166	87.805	4.63842	0.00214412	0	-3.91086	1	1
Solyc01g094725	SL3.0ch01	86046248	86048248	-	1669	340	1573	252	83.076	86.192	3.11562	0.0177138	-2.76771	-1.94971	0.039112	0.916147
Solyc01g094760	SL3.0ch01	86056710	86058710	-	438	273	457	130	61.603	77.853	16.2501	3.93464e-09	-0.016952	2.57632	0.976858	1
Solyc01g094780	SL3.0ch01	86067009	86069009	-	1081	597	920	424	64.422	68.452	4.03045	0.0369752	0.13763	2.07306	0.756194	1
Solyc01g094830	SL3.0ch01	86117901	86119901	-	309	71	435	28	81.316	93.952	12.6367	1.97229e-07	-0.227732	2.53464	0.604331	1
Solyc01g094950	SL3.0ch01	86225744	86227744	+	1951	983	1940	829	66.496	70.061	3.56514	0.00976761	0.147203	9.401	0.601877	1
Solyc01g095040	SL3.0ch01	86291738	86293738	-	270	866	465	677	23.768	40.718	16.9504	1.21114e-16	0.104622	6.21027	0.721209	1
Solyc01g095090	SL3.0ch01	86354705	86356705	-	1477	205	1497	159	87.812	90.399	2.58642	0.0320782	-0.0563109	2.62917	0.922603	1
Solyc01g095140	SL3.0ch01	86395517	86397517	+	804	1042	694	752	43.554	47.994	4.44084	0.0227311	-0.0995417	6.16243	0.88803	1
Solyc01g095160	SL3.0ch01	86400328	86402328	+	11	444	35	444	2.418	7.307	4.88931	0.00220672	0.492234	1.62542	0.339891	1
Solyc01g095190	SL3.0ch01	86415801	86417801	+	230	289	245	229	44.316	51.688	7.37177	0.0395646	-0.49086	-2.10672	0.777768	1
Solyc01g095200	SL3.0ch01	86418730	86420730	+	120	737	151	534	14.002	22.044	8.04146	0.000222908	0	-3.86778	1	1
Solyc01g095220	SL3.0ch01	86434722	86436722	+	64	280	53	95	18.605	35.811	17.2062	0.000315921	0.467866	3.52574	0.259617	1
Solyc01g095240	SL3.0ch01	86459932	86461932	-	33	279	57	217	10.577	20.803	10.226	0.00246574	-2.44991	-1.80124	0.130755	1
Solyc01g095250	SL3.0ch01	86460775	86462775	+	31	121	76	111	20.395	40.642	20.247	0.000273488	0	-3.91086	1	1
Solyc01g095430	SL3.0ch01	86558588	86560588	-	445	1511	709	997	22.751	41.559	18.8087	2.19391e-32	-0.486687	6.23019	0.198908	1
Solyc01g095440	SL3.0ch01	86559762	86561762	+	576	1410	816	1114	29.003	42.28	13.2768	1.35232e-16	0	-3.86745	1	1
Solyc01g095500	SL3.0ch01	86615229	86617229	+	594	1346	718	1049	30.619	40.634	10.0153	2.54963e-09	0.427623	3.57567	0.385103	1
Solyc01g095530	SL3.0ch01	86637952	86639952	-	152	151	104	65	50.165	61.538	11.3734	0.0375236	-0.43185	5.60574	0.307099	1
Solyc01g095550	SL3.0ch01	86643907	86645907	+	41	527	38	159	7.218	19.289	12.071	4.56129e-05	3.25617	-2.99611	0.0745607	1
Solyc01g095620	SL3.0ch01	86705290	86707290	-	586	1010	572	829	36.717	40.828	4.11119	0.0392612	-0.339885	5.7018	0.717782	1
Solyc01g095720	SL3.0ch01	86783925	86785925	+	915	1166	757	788	43.969	48.997	5.02752	0.00698933	-1.73485	-0.635361	0.174186	1
Solyc01g095730	SL3.0ch01	86796231	86798231	+	1237	807	1295	691	60.519	65.206	4.68785	0.00578842	0.286734	4.36634	0.526555	1
Solyc01g095770	SL3.0ch01	86838900	86840900	-	686	1090	576	730	38.626	44.104	5.47801	0.00622033	2.03739	-1.29806	0.0984393	1
Solyc01g095780	SL3.0ch01	86843880	86845880	-	530	155	555	106	77.372	83.964	6.59143	0.00627119	4.63893	-3.52653	0.27123	1
Solyc01g095790	SL3.0ch01	86847418	86849418	+	464	893	391	566	34.193	40.857	6.66377	0.00349726	0.21243	6.29457	0.556836	1
Solyc01g095800	SL3.0ch01	86851725	86853725	+	57	109	9	1	34.337	90	55.6627	0.00220976	0.203919	1.72659	0.696047	1
Solyc01g095840	SL3.0ch01	86874065	86876065	-	488	655	480	492	42.695	49.383	6.68805	0.00578842	1.90135	-3.87171	1	1
Solyc01g095907	SL3.0ch01	86931831	86933831	-	1392	273	1069	160	83.604	86.981	3.37768	0.0259557	-3.66099	-3.31703	0.377407	1
Solyc01g095950	SL3.0ch01	86944858	86946858	+	553	913	531	669	37.722	44.25	6.52831	0.0020742	1.81067	-3.56171	1	1
Solyc01g096020	SL3.0ch01	86993162	86995162	-	73	217	126	181	25.172	41.042	15.8699	0.000194148	-0.151532	3.68006	0.66361	1
Solyc01g096070	SL3.0ch01	87054524	87056524	+	17	1028	130	1039	1.627	11.121	9.49382	8.32219e-20	0.78278	2.4146	0.258863	1
Solyc01g096180	SL3.0ch01	87150412	87152412	-	195	490	150	228	28.467	39.683	11.2154	0.00079498	0.302897	4.13262	0.352733	1
Solyc01g096205	SL3.0ch01	87180375	87182375	-	66	79	74	13	45.517	85.057	39.5402	1.45005e-08	-0.943022	0.0874219	0.142422	1
Solyc01g096230	SL3.0ch01	87195773	87197773	-	387	1089	448	743	26.22	37.615	11.3959	4.58355e-09	0.527091	5.39147	0.105155	1
Solyc01g096260	SL3.0ch01	87212770	87214770	+	179	480	125	220	27.162	36.232	9.06952	0.0091992	-1.46335	1.99293	0.0371547	0.897333
Solyc01g096330	SL3.0ch01	87279071	87281071	+	831	1357	777	1029	37.98	43.023	5.04337	0.0038028	0.820033	0.515313	0.246316	1
Solyc01g096435	SL3.0ch01	87402454	87404454	-	19	363	70	310	4.974	18.421	13.4472	4.30446e-08	-0.284308	4.79683	0.608461	1
Solyc01g096475	SL3.0ch01	87433476	87435476	+	96	390	93	259	19.753	26.42	6.66737	0.0423057	-0.228372	3.07186	0.580387	1
Solyc01g096510	SL3.0ch01	87472284	87474284	-	747	1381	887	1275	35.103	41.027	5.92344	0.000279152	1.67663	3.86531	0.125681	1
Solyc01g096530	SL3.0ch01	87479061	87481061	+	388	110	309	32	77.912	90.616	12.7042	6.00083e-06	0.312976	5.31161	0.246546	1
Solyc01g096580	SL3.0ch01	87529194	87531194	-	498	326	483	244	60.437	66.437	6.00052	0.0292757	0.147918	7.04848	0.6777	1
Solyc01g096740	SL3.0ch01	87633782	87635782	-	645	748	709	541	46.303	56.72	10.4171	7.60494e-07	-1.36676	2.68331	0.0873994	1
Solyc01g096830	SL3.0ch01	87713156	87715156	-	915	759	864	501	54.659	63.297	8.63721	9.57195e-06	0.333214	5.28684	0.481408	1
Solyc01g096990	SL3.0ch01	87845146	87847146	+	956	523	856	391	64.638	68.645	4.00648	0.0478296	0.211669	5.24475	0.44485	1
Solyc01g097080	SL3.0ch01	87915766	87917766	-	172	29	495	36	85.572	93.22	7.6482	0.00541331	-2.54467	-3.70159	0.687205	1
Solyc01g097100	SL3.0ch01	87925016	87927016	-	137	54	72	10	71.728	87.805	16.0771	0.0110559	-2.76115	-3.83217	0.673069	1
Solyc01g097130	SL3.0ch01	87966675	87968675	+	350	257	348	183	57.661	65.537	7.8761	0.0159224	0.0974294	3.58768	0.785157	1
Solyc01g097155	SL3.0ch01	87982818	87984818	-	152	66	192	22	69.725	89.72	19.9949	1.53654e-06	0.239061	-0.00755559	0.741902	1
Solyc01g097230	SL3.0ch01	88037002	88039002	-	290	659	359	611	30.558	37.01	6.45183	0.0080618	0.550918	3.46688	0.114887	1
Solyc01g097250	SL3.0ch01	88047550	88049550	-	180	14	121	1	92.784	99.18	6.39682	0.0236201	-0.0719215	4.52354	0.80918	1
Solyc01g097280	SL3.0ch01	88059539	88061539	-	911	666	940	546	57.768	63.257	5.48915	0.0051768	4.14286	-0.902022	0.126668	1
Solyc01g097390	SL3.0ch01	88140785	88142785	+	906	239	858	167	79.127	83.707	4.58068	0.0152194	-1.00968	1.88685	0.313434	1
Solyc01g097510	SL3.0ch01	88214492	88216492	-	312	787	334	682	28.389	32.874	4.48457	0.0457647	-0.330848	4.7262	0.452332	1
Solyc01g097520	SL3.0ch01	88217534	88219534	+	300	1414	324	1123	17.503	22.391	4.88824	0.00205114	-0.350876	6.01066	0.415935	1
Solyc01g097540	SL3.0ch01	88227609	88229609	-	2012	1358	1775	1030	59.703	63.28	3.57659	0.0101373	0.276645	5.33433	0.359343	1
Solyc01g097550	SL3.0ch01	88228136	88230136	+	917	1591	854	1177	36.563	42.048	5.48525	0.000638878	-1.16878	-3.4211	0.583525	1
Solyc01g097610	SL3.0ch01	88269754	88271754	+	952	391	804	266	70.886	75.14	4.25411	0.0384888	0.279445	4.64942	0.312594	1
Solyc01g097825	SL3.0ch01	88403697	88405697	-	44	66	81	54	40	60	20	0.00556836	-1.92464	-2.01402	0.167156	1
Solyc01g097870	SL3.0ch01	88444053	88446053	+	820	644	684	414	56.011	62.295	6.28415	0.00436866	0.137402	8.30813	0.653842	1
Solyc01g098000	SL3.0ch01	88511418	88513418	+	34	345	30	110	8.971	21.429	12.4576	0.000933947	-2.2923	-3.47118	0.355419	1
Solyc01g098050	SL3.0ch01	88527921	88529921	-	1887	940	1683	718	66.749	70.096	3.34659	0.0213562	1.89816	-3.83241	1	1
Solyc01g098080	SL3.0ch01	88556480	88558480	-	665	717	733	639	48.119	53.426	5.30699	0.0124564	-0.552667	3.48234	0.150117	1
Solyc01g098150	SL3.0ch01	88605324	88607324	-	223	142	245	94	61.096	72.271	11.1755	0.00500291	-0.136454	3.05621	0.737977	1
Solyc01g098180	SL3.0ch01	88647213	88649213	-	1533	746	1568	580	67.266	72.998	5.73179	0.00016136	0.290995	6.24148	0.261284	1
Solyc01g098220	SL3.0ch01	88681235	88683235	-	226	190	255	154	54.327	62.347	8.02027	0.0365675	-3.92692	-3.66729	0.360173	1
Solyc01g098230	SL3.0ch01	88679181	88681181	+	1018	923	856	587	52.447	59.321	6.87367	0.000323952	0.458579	4.70156	0.145773	1
Solyc01g098310	SL3.0ch01	88750212	88752212	+	832	327	926	245	71.786	79.078	7.29169	0.000226575	1.78818	-3.87428	1	1
Solyc01g098320	SL3.0ch01	88753570	88755570	+	375	451	349	268	45.4	56.564	11.1645	0.000151395	-0.791945	2.5002	0.0919441	1
Solyc01g098340	SL3.0ch01	88761075	88763075	+	146	182	256	172	44.512	59.813	15.3009	0.000169699	0.450154	1.28675	0.529034	1
Solyc01g098360	SL3.0ch01	88774789	88776789	-	47	48	36	0	49.474	100	50.5263	2.32556e-08	0	-3.76338	1	1
Solyc01g098390	SL3.0ch01	88790146	88792146	+	468	585	467	437	44.444	51.659	7.21485	0.0042021	0.608136	3.22722	0.1525	1
Solyc01g098460	SL3.0ch01	88850383	88852383	+	251	91	228	34	73.392	87.023	13.6311	0.000200597	0.0888541	4.38248	0.781062	1
Solyc01g098480	SL3.0ch01	88862445	88864445	-	968	860	1000	725	52.954	57.971	5.01697	0.00685501	0	-3.91086	1	1
Solyc01g098525	SL3.0ch01	88893122	88895122	-	8	12	22	0	40	100	60	5.99737e-05	0	-3.65213	1	1
Solyc01g098600	SL3.0ch01	88948935	88950935	+	248	672	321	564	26.957	36.271	9.31466	0.000121553	0	-3.91086	1	1
Solyc01g098690	SL3.0ch01	88987481	88989481	+	60	297	284	263	16.807	51.92	35.1128	7.5426e-26	0.358687	5.07301	0.523913	1
Solyc01g098725	SL3.0ch01	89043133	89045133	+	840	283	666	173	74.8	79.38	4.58057	0.0329638	0.583561	4.68942	0.19483	1
Solyc01g098760	SL3.0ch01	89057097	89059097	+	1034	146	989	99	87.627	90.901	3.27362	0.0245965	0.233435	6.33998	0.452158	1
Solyc01g098750	SL3.0ch01	89058282	89060282	+	1037	619	998	432	62.621	69.79	7.16944	0.000132135	0.198791	3.57542	0.614517	1
Solyc01g098770	SL3.0ch01	89085285	89087285	-	115	47	67	6	70.988	91.781	20.7932	0.00113358	3.64823	-2.45012	0.0999375	1
Solyc01g098840	SL3.0ch01	89113227	89115227	+	530	454	604	402	53.862	60.04	6.17797	0.0130846	0.16595	4.36304	0.654842	1
Solyc01g098850	SL3.0ch01	89122868	89124868	-	301	914	341	654	24.774	34.271	9.49769	7.80995e-06	-1.4097	-0.854071	0.22887	1
Solyc01g098870	SL3.0ch01	89123944	89125944	+	248	1000	298	849	19.872	25.981	6.10902	0.00147289	-0.0761428	6.35863	0.793753	1
Solyc01g098880	SL3.0ch01	89134050	89136050	+	17	66	30	23	20.482	56.604	36.1218	0.000161737	0.188397	6.58772	0.477614	1
Solyc01g098940	SL3.0ch01	89185943	89187943	-	650	710	596	540	47.794	52.465	4.67067	0.0393819	0.421102	-3.18062	0.92343	1
Solyc01g098950	SL3.0ch01	89186227	89188227	+	432	756	392	546	36.364	41.791	5.42741	0.0241926	0.342174	2.82001	0.449637	1
Solyc01g098960	SL3.0ch01	89196160	89198160	+	1042	104	977	68	90.925	93.493	2.56787	0.0453618	-0.297949	-1.3172	0.850488	1
Solyc01g098985	SL3.0ch01	89220207	89222207	-	2449	665	2183	502	78.645	81.304	2.65871	0.0250103	-1.3364	-0.0476662	0.223619	1
Solyc01g098990	SL3.0ch01	89219885	89221885	+	2665	765	2372	534	77.697	81.624	3.92743	0.000483396	-0.646782	5.07667	0.0400278	0.92309
Solyc01g099020	SL3.0ch01	89238710	89240710	-	1253	377	1308	321	76.871	80.295	3.42349	0.0348621	0.78307	-0.625812	0.691303	1
Solyc01g099210	SL3.0ch01	89383687	89385687	+	109	133	100	70	45.041	58.824	13.7822	0.0152183	1.89414	-3.72334	1	1
Solyc01g099270	SL3.0ch01	89425468	89427468	-	1122	605	872	388	64.968	69.206	4.2382	0.0312524	0.251316	-2.13405	0.906997	1
Solyc01g099310	SL3.0ch01	89478815	89480815	+	1684	307	1693	231	84.581	87.994	3.41315	0.00574868	-0.392605	3.19638	0.331153	1
Solyc01g099320	SL3.0ch01	89488953	89490953	-	330	806	352	524	29.049	40.183	11.1334	1.6549e-06	0	-3.91086	1	1
Solyc01g099370	SL3.0ch01	89534646	89536646	+	688	1483	605	1072	31.69	36.076	4.38586	0.0111734	0.192184	8.79201	0.714503	1
Solyc01g099380	SL3.0ch01	89542236	89544236	-	67	438	101	287	13.267	26.031	12.7636	1.10065e-05	0.595011	3.75077	0.0935006	1
Solyc01g099385	SL3.0ch01	89543837	89545837	-	1045	607	1044	509	63.257	67.225	3.96807	0.0357204	-0.299806	2.39781	0.534688	1
Solyc01g099400	SL3.0ch01	89543642	89545642	+	1047	663	1045	508	61.228	67.289	6.06105	0.0011797	0.0534143	6.88872	0.839945	1
Solyc01g099415	SL3.0ch01	89559594	89561594	+	1453	703	1380	495	67.393	73.6	6.20668	9.00629e-05	0.318904	-0.274887	0.726056	1
Solyc01g099420	SL3.0ch01	89565852	89567852	+	229	11	158	0	95.417	100	4.58333	0.00981809	0.788965	0.0636718	0.278418	1
Solyc01g099580	SL3.0ch01	89654268	89656268	-	385	428	291	228	47.355	56.069	8.71389	0.00539075	0.269126	2.10956	0.581929	1
Solyc01g099640	SL3.0ch01	89703203	89705203	-	728	712	654	533	50.556	55.097	4.54133	0.0374299	-0.852857	-1.21448	0.534286	1
Solyc01g099690	SL3.0ch01	89731040	89733040	+	1272	613	1176	432	67.48	73.134	5.65422	0.000993291	-0.196305	8.0158	0.523436	1
Solyc01g099860	SL3.0ch01	89873814	89875814	-	939	1022	854	782	47.884	52.2	4.31676	0.020728	0.0306808	4.81827	0.915314	1
Solyc01g099910	SL3.0ch01	89910286	89912286	-	232	893	242	638	20.622	27.5	6.87778	0.00129697	0.312973	-1.86551	0.773843	1
Solyc01g099950	SL3.0ch01	89929618	89931618	-	1206	434	1045	290	73.537	78.277	4.74057	0.00762458	0.414083	-2.26885	0.912083	1
Solyc01g099970	SL3.0ch01	89941739	89943739	-	692	1026	786	697	40.279	53.001	12.7213	1.17181e-11	1.05683	4.00087	0.00751702	0.411744
Solyc01g100110	SL3.0ch01	90079225	90081225	-	1626	508	1498	375	76.195	79.979	3.7837	0.00999988	0.232591	6.9091	0.407477	1
Solyc01g100120	SL3.0ch01	90095959	90097959	-	554	880	600	755	38.633	44.28	5.64725	0.00691944	-0.0152984	-3.33864	1	1
Solyc01g100140	SL3.0ch01	90109257	90111257	-	52	48	58	3	52	95.082	43.082	2.32979e-08	0.234073	3.38531	0.514581	1
Solyc01g100220	SL3.0ch01	90148039	90150039	-	2806	440	2497	321	86.445	88.609	2.16409	0.0233372	-0.0616358	0.528614	0.941795	1
Solyc01g100350	SL3.0ch01	90293328	90295328	-	562	218	588	67	72.051	89.771	17.7197	3.44281e-16	0.315439	8.6254	0.239928	1
Solyc01g100370	SL3.0ch01	90300668	90302668	+	675	606	556	343	52.693	61.846	9.15329	0.0001194	0.553502	8.70088	0.0785365	1
Solyc01g100510	SL3.0ch01	90396197	90398197	-	1239	844	1223	617	59.482	66.467	6.98587	3.74215e-05	0.284383	2.83321	0.52076	1
Solyc01g100520	SL3.0ch01	90409032	90411032	-	588	920	600	658	38.992	47.695	8.70271	2.553e-05	-0.389359	7.96639	0.194654	1
Solyc01g100660	SL3.0ch01	90518405	90520405	+	361	780	342	580	31.639	37.093	5.45436	0.0211027	-1.059	4.26208	0.0100796	0.480064
Solyc01g100670	SL3.0ch01	90530557	90532557	+	60	551	123	468	9.82	20.812	10.9922	1.10834e-06	0	-3.91086	1	1
Solyc01g100700	SL3.0ch01	90545827	90547827	-	1289	843	1140	612	60.46	65.068	4.60883	0.00835296	0.0230241	4.62079	0.940626	1
Solyc01g100790	SL3.0ch01	90606554	90608554	+	1398	449	1287	282	75.69	82.027	6.33646	4.01745e-05	0.206708	-0.229201	0.854693	1
Solyc01g100820	SL3.0ch01	90628484	90630484	-	12	642	92	385	1.835	19.287	17.4523	6.43955e-23	0.065453	4.85665	0.822827	1
Solyc01g100830	SL3.0ch01	90627567	90629567	+	12	671	92	462	1.757	16.606	14.8495	1.93279e-20	0.75997	-2.97571	0.724635	1
Solyc01g100840	SL3.0ch01	90636099	90638099	-	1914	1107	1360	625	63.357	68.514	5.15735	0.000697017	0.317278	4.67581	0.336152	1
Solyc01g100860	SL3.0ch01	90644189	90646189	-	699	404	708	321	63.373	68.805	5.43204	0.0192178	0.210681	8.48664	0.436275	1
Solyc01g100890	SL3.0ch01	90659788	90661788	+	1461	1060	1249	741	57.953	62.764	4.81063	0.00312109	-1.24026	-1.59083	0.302346	1
Solyc01g100960	SL3.0ch01	90720945	90722945	-	578	1622	529	1098	26.273	32.514	6.2411	0.000134962	0.138264	5.07716	0.629454	1
Solyc01g100970	SL3.0ch01	90721267	90723267	+	790	1673	749	1172	32.075	38.99	6.9154	1.25463e-05	0.0744826	8.72129	0.802375	1
Solyc01g100980	SL3.0ch01	90733249	90735249	-	28	92	49	71	23.333	40.833	17.5	0.0126263	-1.71265	-3.53354	0.477933	1
Solyc01g101030	SL3.0ch01	90772599	90774599	-	35	556	53	510	5.922	9.414	3.49169	0.0462121	0.0130589	1.87116	0.989835	1
Solyc01g101050	SL3.0ch01	90784800	90786800	+	997	451	1044	350	68.854	74.892	6.0388	0.00132238	0	-2.41046	1	1
Solyc01g101060	SL3.0ch01	90793404	90795404	+	169	687	259	631	19.743	29.101	9.35813	3.51626e-05	0.388927	10.421	0.276137	1
Solyc01g101100	SL3.0ch01	90829283	90831283	-	487	554	505	434	46.782	53.781	6.99868	0.0051765	-0.344957	4.88191	0.305409	1
Solyc01g101160	SL3.0ch01	90877101	90879101	+	939	375	815	256	71.461	76.097	4.63592	0.0236336	-0.0289892	5.06363	0.925021	1
Solyc01g102330	SL3.0ch01	91022041	91024041	-	220	817	228	649	21.215	25.998	4.78268	0.0285472	0.173089	6.30404	0.650958	1
Solyc01g102500	SL3.0ch01	91170211	91172211	-	129	485	168	464	21.01	26.582	5.57251	0.0419237	0.0584631	3.74319	0.884705	1
Solyc01g102510	SL3.0ch01	91184569	91186569	-	729	937	786	831	43.758	48.609	4.85103	0.0129499	0.0240574	6.06229	0.935707	1
Solyc01g102633	SL3.0ch01	91264580	91266580	-	845	464	870	378	64.553	69.712	5.15844	0.0139716	0	-3.87342	1	1
Solyc01g102637	SL3.0ch01	91265729	91267729	-	2253	365	2302	299	86.058	88.504	2.44636	0.0187427	0	-3.91086	1	1
Solyc01g102790	SL3.0ch01	91376664	91378664	-	1	255	10	176	0.391	5.376	4.98572	0.00309176	0	-3.91086	1	1
Solyc01g102860	SL3.0ch01	91417798	91419798	+	224	137	241	95	62.05	71.726	9.67633	0.0170967	4.17875	-3.56281	0.229527	1
Solyc01g102920	SL3.0ch01	91453798	91455798	+	176	91	239	56	65.918	81.017	15.0993	0.000229769	0	-3.91086	1	1
Solyc01g102960	SL3.0ch01	91485830	91487830	+	348	126	391	94	73.418	80.619	7.20084	0.0189937	-1.16401	8.12764	0.0616636	1
Solyc01g103060	SL3.0ch01	91618435	91620435	+	1112	649	1057	512	63.146	67.368	4.22181	0.0221732	0	-3.82789	1	1
Solyc01g103120	SL3.0ch01	91662092	91664092	-	217	22	121	3	90.795	97.581	6.78567	0.0296864	-0.16724	0.487337	0.801144	1
Solyc01g103170	SL3.0ch01	91713909	91715909	-	431	606	584	509	41.562	53.431	11.8687	3.88419e-07	0.256014	5.304	0.558977	1
Solyc01g103350	SL3.0ch01	91855857	91857857	+	1603	704	1673	600	69.484	73.603	4.11899	0.00556763	-0.213501	4.77046	0.479345	1
Solyc01g103380	SL3.0ch01	91877192	91879192	-	1529	472	1445	360	76.412	80.055	3.64361	0.0149824	0.0277712	4.83953	0.933751	1
Solyc01g103390	SL3.0ch01	91882287	91884287	-	1679	885	1718	731	65.484	70.151	4.66746	0.00150358	-1.2667	1.58047	0.0972709	1
Solyc01g103395	SL3.0ch01	91882287	91884287	-	1679	885	1718	731	65.484	70.151	4.66746	0.00150358	0	-3.91086	1	1
Solyc01g103400	SL3.0ch01	91882599	91884599	+	1327	1117	1272	887	54.296	58.916	4.61993	0.00483201	-0.166991	1.34668	0.758586	1
Solyc01g103540	SL3.0ch01	92003609	92005609	+	267	352	183	121	43.134	60.197	17.0633	8.19942e-06	0.264345	10.2141	0.331842	1
Solyc01g103550	SL3.0ch01	92013612	92015612	-	221	855	230	673	20.539	25.471	4.93162	0.0204634	0	-3.63278	1	1
Solyc01g103670	SL3.0ch01	92094754	92096754	+	497	940	431	618	34.586	41.087	6.50081	0.00311433	-0.126274	5.39514	0.627223	1
Solyc01g103770	SL3.0ch01	92176234	92178234	-	979	501	887	355	66.149	71.417	5.26842	0.00812761	0.100999	0.804462	0.875003	1
Solyc01g103803	SL3.0ch01	92232731	92234731	-	495	278	758	77	64.036	90.778	26.7422	1.76065e-37	0	-3.91086	1	1
Solyc01g103830	SL3.0ch01	92232758	92234758	-	495	278	758	77	64.036	90.778	26.7422	1.76065e-37	0	-3.87249	1	1
Solyc01g103850	SL3.0ch01	92241986	92243986	+	1189	728	1027	537	62.024	65.665	3.64097	0.0479963	0.318584	4.79592	0.265541	1
Solyc01g103860	SL3.0ch01	92248812	92250812	+	0	33	19	0	0	100	100	2.81787e-13	0.189956	-2.07501	0.885216	1
Solyc01g103970	SL3.0ch01	92341953	92343953	+	984	682	900	298	59.064	75.125	16.0616	6.95072e-18	-0.0361017	6.41871	0.910963	1
Solyc01g103980	SL3.0ch01	92346884	92348884	+	124	327	116	104	27.494	52.727	25.2328	3.52137e-09	0	-3.91086	1	1
Solyc01g104100	SL3.0ch01	92457411	92459411	-	1166	800	1212	601	59.308	66.851	7.54228	1.06478e-05	0	-3.17191	1	1
Solyc01g104185	SL3.0ch01	92541025	92543025	-	105	88	94	35	54.404	72.868	18.4641	0.00301225	0	-3.69457	1	1
Solyc01g104200	SL3.0ch01	92542482	92544482	-	459	435	590	393	51.342	60.02	8.67806	0.000624863	3.89805	-3.70539	0.372734	1
Solyc01g104290	SL3.0ch01	92599214	92601214	+	30	452	34	281	6.224	10.794	4.56958	0.0414706	0.190561	-1.65973	0.886607	1
Solyc01g104310	SL3.0ch01	92624015	92626015	-	649	265	609	183	71.007	76.894	5.88737	0.0133045	0.031616	5.515	0.908831	1
Solyc01g104435	SL3.0ch01	92755940	92757940	-	721	85	605	40	89.454	93.798	4.34436	0.00851063	-0.569435	0.868903	0.256466	1
Solyc01g104438	SL3.0ch01	92773961	92775961	+	881	48	488	13	94.833	97.405	2.57204	0.0469784	-0.779978	-1.24248	0.410905	1
Solyc01g104725	SL3.0ch01	93018430	93020430	-	1204	754	1254	673	61.491	65.075	3.58393	0.0389434	0.375678	3.49099	0.324615	1
Solyc01g104770	SL3.0ch01	93030728	93032728	-	45	115	48	19	28.125	71.642	43.5168	1.78371e-08	-0.49178	-1.59457	0.615223	1
Solyc01g104840	SL3.0ch01	93068587	93070587	-	485	568	564	528	46.059	51.648	5.58947	0.0221432	0.0919704	7.45072	0.734759	1
Solyc01g105050	SL3.0ch01	93225087	93227087	+	59	329	56	196	15.206	22.222	7.01604	0.0465031	-1.18834	5.15975	0.0287803	0.794866
Solyc01g105120	SL3.0ch01	93282318	93284318	-	315	914	289	507	25.631	36.307	10.6759	2.74834e-06	-0.721544	6.88472	0.0530865	1
Solyc01g105130	SL3.0ch01	93293504	93295504	+	1740	458	1685	344	79.163	83.046	3.88296	0.00412825	0.367778	4.20772	0.29708	1
Solyc01g105140	SL3.0ch01	93307374	93309374	-	1896	667	1758	417	73.976	80.828	6.85178	2.04034e-07	0.0471263	6.64344	0.86587	1
Solyc01g105165	SL3.0ch01	93342146	93344146	-	1459	389	1235	260	78.95	82.609	3.65848	0.0178004	-0.30815	5.17565	0.285976	1
Solyc01g105225	SL3.0ch01	93350861	93352861	+	4	285	16	310	1.384	4.908	3.52389	0.0373195	-0.680285	-2.62181	0.858771	1
Solyc01g105280	SL3.0ch01	93399881	93401881	+	747	888	689	667	45.688	50.811	5.12314	0.0132451	0.23871	5.93803	0.444626	1
Solyc01g105460	SL3.0ch01	93520791	93522791	+	73	652	213	494	10.069	30.127	20.0583	2.87625e-20	-0.171501	3.19332	0.610946	1
Solyc01g105493	SL3.0ch01	93533539	93535539	-	670	361	757	278	64.985	73.14	8.15465	0.000272462	0.534316	-0.243597	0.452282	1
Solyc01g105470	SL3.0ch01	93532296	93534296	-	79	264	95	197	23.032	32.534	9.50218	0.0199584	1.04056	-2.62571	0.585927	1
Solyc01g105520	SL3.0ch01	93559891	93561891	+	234	280	315	220	45.525	58.879	13.3532	7.70033e-05	0.0570531	2.32348	0.925496	1
Solyc01g105750	SL3.0ch01	93701532	93703532	-	10	107	10	30	8.547	25	16.453	0.0242515	0	-3.91086	1	1
Solyc01g105760	SL3.0ch01	93701842	93703842	-	10	107	10	30	8.547	25	16.453	0.0242515	0	-3.91086	1	1
Solyc01g105780	SL3.0ch01	93722774	93724774	-	1530	735	1348	512	67.55	72.473	4.92345	0.00206957	0.488943	4.73846	0.211627	1
Solyc01g105890	SL3.0ch01	93804816	93806816	+	337	431	456	456	43.88	50	6.11979	0.024834	-1.13155	-0.79262	0.43082	1
Solyc01g105980	SL3.0ch01	93874862	93876862	-	765	943	746	777	44.789	48.982	4.19304	0.0336241	-0.0094721	4.66269	0.975709	1
Solyc01g106040	SL3.0ch01	93907673	93909673	+	603	274	629	209	68.757	75.06	6.30254	0.00916653	-0.0643732	2.73773	0.883644	1
Solyc01g106050	SL3.0ch01	93927865	93929865	-	1059	526	1217	318	66.814	79.283	12.4695	9.82398e-14	0.459402	3.42141	0.405831	1
Solyc01g106070	SL3.0ch01	93955202	93957202	+	579	513	610	443	53.022	57.93	4.90775	0.0421718	-2.72479	-2.90539	0.599184	1
Solyc01g106120	SL3.0ch01	93983666	93985666	+	1871	168	1744	89	91.761	95.145	3.3839	0.000116885	0.259902	2.92384	0.510506	1
Solyc01g106150	SL3.0ch01	93993484	93995484	-	647	578	497	344	52.816	59.096	6.27999	0.01207	-0.145195	-0.737716	0.882095	1
Solyc01g106190	SL3.0ch01	94033454	94035454	+	2733	472	2723	344	85.273	88.784	3.51082	0.000164857	0.353977	2.77239	0.355538	1
Solyc01g106200	SL3.0ch01	94055799	94057799	-	751	314	743	240	70.516	75.585	5.06851	0.0226128	1.02268	-0.629881	0.240903	1
Solyc01g106253	SL3.0ch01	94087693	94089693	+	76	103	129	57	42.458	69.355	26.8967	1.7201e-06	0.177548	3.03648	0.674949	1
Solyc01g106260	SL3.0ch01	94108266	94110266	+	498	170	423	90	74.551	82.456	7.90524	0.00328639	0.128419	5.9314	0.664191	1
Solyc01g106290	SL3.0ch01	94120325	94122325	+	99	446	114	354	18.165	24.359	6.19384	0.0315347	0.194558	5.94597	0.642479	1
Solyc01g106410	SL3.0ch01	94208911	94210911	-	927	1217	871	994	43.237	46.702	3.46547	0.0480312	0	-3.91086	1	1
Solyc01g106420	SL3.0ch01	94209295	94211295	+	968	1238	912	988	43.88	48	4.11967	0.0178674	-0.00522334	3.40985	0.991897	1
Solyc01g106430	SL3.0ch01	94225622	94227622	-	1007	882	784	491	53.309	61.49	8.18157	3.23303e-05	-0.333054	6.43479	0.274937	1
Solyc01g106490	SL3.0ch01	94261304	94263304	-	317	946	379	857	25.099	30.663	5.56446	0.00553342	0	-3.91086	1	1
Solyc01g106510	SL3.0ch01	94269470	94271470	-	323	80	188	21	80.149	89.952	9.80327	0.00503917	4.65464	-0.522609	0.0181831	0.649471
Solyc01g106540	SL3.0ch01	94277506	94279506	-	711	256	706	197	73.526	78.184	4.65746	0.0368846	-0.815755	-1.22973	0.557541	1
Solyc01g106530	SL3.0ch01	94270628	94272628	+	82	36	57	2	69.492	96.61	27.1186	5.6279e-05	0	-3.91086	1	1
Solyc01g106620	SL3.0ch01	94319268	94321268	+	418	1289	472	1163	24.487	28.869	4.3811	0.010238	0	-3.91086	1	1
Solyc01g106630	SL3.0ch01	94324378	94326378	-	623	688	714	534	47.521	57.212	9.69056	7.26616e-06	0	-3.91086	1	1
Solyc01g106780	SL3.0ch01	94441839	94443839	+	297	155	378	107	65.708	77.938	12.2302	0.000150901	0.174202	5.32373	0.535509	1
Solyc01g107050	SL3.0ch01	94610762	94612762	-	306	165	331	126	64.968	72.429	7.46073	0.0306835	2.52741	-3.75971	0.672758	1
Solyc01g107120	SL3.0ch01	94634754	94636754	+	1371	599	1407	469	69.594	75	5.40609	0.000758585	1.50603	-1.1025	0.113636	1
Solyc01g107150	SL3.0ch01	94663782	94665782	-	1503	503	1284	285	74.925	81.836	6.91034	4.75246e-06	-0.192171	5.52271	0.489589	1
Solyc01g107170	SL3.0ch01	94680306	94682306	+	171	934	215	740	15.475	22.513	7.03798	0.000244728	0.653898	7.91441	0.139797	1
Solyc01g107230	SL3.0ch01	94750277	94752277	+	224	168	452	125	57.143	78.336	21.1934	5.40431e-11	0	-3.91086	1	1
Solyc01g107330	SL3.0ch01	94793139	94795139	-	1512	605	1537	424	71.422	78.378	6.95656	2.58608e-06	-0.505141	4.99738	0.0903891	1
Solyc01g107340	SL3.0ch01	94794213	94796213	+	862	692	906	507	55.47	64.119	8.64914	1.03438e-05	-0.106797	1.00335	0.886615	1
Solyc01g107360	SL3.0ch01	94820029	94822029	+	145	1180	223	940	10.943	19.175	8.23115	9.1846e-08	0.201768	5.10388	0.5758	1
Solyc01g107390	SL3.0ch01	94845241	94847241	-	27	394	41	318	6.413	11.421	5.00731	0.0295548	0.0193732	5.91178	0.969962	1
Solyc01g107420	SL3.0ch01	94883441	94885441	+	590	698	626	525	45.807	54.387	8.58004	0.000117618	0.175863	-0.991147	0.86077	1
Solyc01g107415	SL3.0ch01	94883536	94885536	+	590	675	626	525	46.64	54.387	7.74717	0.000584132	0.369434	0.444302	0.579044	1
Solyc01g107510	SL3.0ch01	94921183	94923183	+	1736	761	1475	449	69.523	76.663	7.13977	1.04599e-06	0.0508764	5.51147	0.870461	1
Solyc01g107520	SL3.0ch01	94940653	94942653	+	240	416	339	446	36.585	43.185	6.59935	0.0229083	-0.980758	-2.43456	0.544117	1
Solyc01g107580	SL3.0ch01	94972798	94974798	+	399	773	362	470	34.044	43.51	9.46525	0.00010247	0.153082	1.96476	0.771571	1
Solyc01g107640	SL3.0ch01	95018138	95020138	-	13	196	48	225	6.22	17.582	11.3623	0.000627368	-0.246069	6.66148	0.423559	1
Solyc01g107670	SL3.0ch01	95034197	95036197	-	56	519	59	231	9.739	20.345	10.6057	0.00013735	0.397755	5.83253	0.262347	1
Solyc01g107700	SL3.0ch01	95048179	95050179	+	469	422	533	314	52.637	62.928	10.2905	7.76787e-05	0.0972608	6.38916	0.74281	1
Solyc01g107720	SL3.0ch01	95059929	95061929	+	1810	431	1852	351	80.768	84.067	3.29967	0.00970843	0	-3.91086	1	1
Solyc01g107937	SL3.0ch01	95210600	95212600	+	1652	660	1701	480	71.453	77.992	6.53846	3.78886e-06	2.1734	-2.17169	0.159951	1
Solyc01g107940	SL3.0ch01	95210600	95212600	+	1652	660	1701	480	71.453	77.992	6.53846	3.78886e-06	0.114394	4.48921	0.682411	1
Solyc01g108043	SL3.0ch01	95313394	95315394	+	131	158	218	21	45.329	91.213	45.8847	4.72818e-29	0.403479	-1.63074	0.672353	1
Solyc01g108047	SL3.0ch01	95314040	95316040	+	41	140	141	20	22.652	87.578	64.9257	1.33614e-33	0.149178	3.20861	0.768483	1
Solyc01g108210	SL3.0ch01	95462622	95464622	+	310	213	266	91	59.273	74.51	15.2364	1.6136e-05	-0.867945	1.91101	0.231359	1
Solyc01g108240	SL3.0ch01	95499842	95501842	+	1087	889	1256	818	55.01	60.559	5.54918	0.00124727	-0.227024	6.43691	0.790924	1
Solyc01g108280	SL3.0ch01	95529891	95531891	-	1331	347	1069	212	79.321	83.45	4.12981	0.0106025	0.106715	6.21178	0.679912	1
Solyc01g108290	SL3.0ch01	95537215	95539215	+	732	190	859	138	79.393	86.158	6.76585	0.000402602	0.199831	4.62196	0.467038	1
Solyc01g108320	SL3.0ch01	95564503	95566503	+	565	298	417	168	65.469	71.282	5.81276	0.0392459	-1.1916	-2.80797	0.762648	1
Solyc01g108420	SL3.0ch01	95653149	95655149	+	0	44	24	122	0	16.438	16.4384	0.00422624	0.327788	2.64145	0.488426	1
Solyc01g108500	SL3.0ch01	95704702	95706702	-	308	1022	273	711	23.158	27.744	4.58601	0.0262731	0.0183025	9.23764	0.948882	1
Solyc01g108520	SL3.0ch01	95718155	95720155	+	2091	1278	2103	1061	62.066	66.466	4.4006	0.000809092	-0.407832	-1.97483	0.744734	1
Solyc01g108550	SL3.0ch01	95726727	95728727	-	310	480	299	197	39.241	60.282	21.0418	3.44364e-12	1.73129	-2.65514	0.212065	1
Solyc01g108560	SL3.0ch01	95726083	95728083	+	326	424	298	146	43.467	67.117	23.6505	4.4355e-14	-0.437541	3.43466	0.464222	1
Solyc01g108570	SL3.0ch01	95728970	95730970	+	394	946	449	785	29.403	36.386	6.98275	0.000682001	0.28076	2.25552	0.619223	1
Solyc01g108630	SL3.0ch01	95770953	95772953	+	34	131	143	129	20.606	52.574	31.9675	3.11513e-10	-1.3686	-0.402016	0.29407	1
Solyc01g108670	SL3.0ch01	95807333	95809333	-	653	320	734	242	67.112	75.205	8.09289	0.000386285	-3.18843	-1.03653	0.0301631	0.812405
Solyc01g108700	SL3.0ch01	95831158	95833158	+	777	659	869	531	54.109	62.071	7.96279	9.83451e-05	-0.385156	-3.51972	1	1
Solyc01g108730	SL3.0ch01	95850075	95852075	-	3	109	9	55	2.679	14.063	11.3839	0.0196096	-0.0110753	1.46632	1	1
Solyc01g108880	SL3.0ch01	95941759	95943759	-	86	111	144	37	43.655	79.558	35.9032	1.38629e-11	-0.880101	6.71085	0.0409135	0.928674
Solyc01g108910	SL3.0ch01	95953706	95955706	-	1240	601	1277	407	67.355	75.831	8.47666	2.38943e-07	-0.938982	7.06279	0.0667372	1
Solyc01g108935	SL3.0ch01	95977200	95979200	+	17	240	32	168	6.615	16	9.38521	0.00546515	-3.04977	-3.21313	0.45215	1
Solyc01g108975	SL3.0ch01	96002607	96004607	+	909	158	829	106	85.192	88.663	3.47097	0.042791	7.65084	-1.53468	0.000132071	0.0234993
Solyc01g109040	SL3.0ch01	96021434	96023434	+	154	67	282	72	69.683	79.661	9.97776	0.0191679	-0.99051	4.10634	0.163142	1
Solyc01g109190	SL3.0ch01	96138544	96140544	+	1087	573	1151	378	65.482	75.278	9.79603	1.66001e-08	-0.0210148	-0.190955	1	1
Solyc01g109210	SL3.0ch01	96139047	96141047	+	763	389	811	176	66.233	82.168	15.9355	1.15845e-15	0.126577	2.42728	0.770038	1
Solyc01g109200	SL3.0ch01	96145857	96147857	-	256	31	115	3	89.199	97.458	8.25902	0.0120249	0	-3.91086	1	1
Solyc01g109280	SL3.0ch01	96193990	96195990	-	1373	576	1338	406	70.446	76.72	6.2738	8.77038e-05	0.266692	5.08432	0.378677	1
Solyc01g109290	SL3.0ch01	96200939	96202939	-	914	859	1005	774	51.551	56.492	4.94137	0.00840641	0.032038	3.67559	0.925236	1
Solyc01g109300	SL3.0ch01	96200783	96202783	+	913	873	1005	780	51.12	56.303	5.1827	0.0054171	0.0339442	7.81107	0.934378	1
Solyc01g109500	SL3.0ch01	96342459	96344459	-	471	1021	475	839	31.568	36.149	4.5808	0.0236072	-0.431454	0.0567893	0.732848	1
Solyc01g109510	SL3.0ch01	96350560	96352560	+	1347	709	1377	540	65.516	71.831	6.31542	9.39837e-05	0.396566	5.6688	0.178598	1
Solyc01g109520	SL3.0ch01	96367132	96369132	-	486	697	630	706	41.082	47.156	6.07369	0.00597601	0.292797	8.23434	0.261219	1
Solyc01g109560	SL3.0ch01	96390208	96392208	-	566	350	487	225	61.79	68.399	6.60848	0.0129057	0.257554	3.18898	0.482951	1
Solyc01g109580	SL3.0ch01	96403240	96405240	-	787	485	710	347	61.871	67.171	5.30017	0.0174124	-0.600722	1.58284	0.440548	1
Solyc01g109680	SL3.0ch01	96490167	96492167	-	1100	1423	927	1048	43.599	46.937	3.33782	0.0472194	0.184307	5.03443	0.562037	1
Solyc01g109690	SL3.0ch01	96493893	96495893	-	113	532	155	284	17.519	35.308	17.7881	6.8339e-10	-2.99346	-2.89388	0.194036	1
Solyc01g109730	SL3.0ch01	96522646	96524646	+	494	352	492	242	58.392	67.03	8.63754	0.00158517	-0.859423	-2.64254	0.694007	1
Solyc01g109880	SL3.0ch01	96636667	96638667	+	23	456	37	361	4.802	9.296	4.49481	0.0214542	0.0480218	8.68916	0.889894	1
Solyc01g109910	SL3.0ch01	96665820	96667820	+	1379	973	1400	796	58.631	63.752	5.12132	0.00139408	0.0157813	5.49039	0.959153	1
Solyc01g109920	SL3.0ch01	96672165	96674165	+	442	709	451	485	38.401	48.184	9.78237	4.62232e-05	-0.0485556	5.87219	0.917213	1
Solyc01g109960	SL3.0ch01	96700172	96702172	-	369	646	367	521	36.355	41.329	4.97415	0.0461785	0.195303	4.26558	0.537642	1
Solyc01g110030	SL3.0ch01	96766217	96768217	-	377	449	478	378	45.642	55.841	10.1995	0.000154506	-0.0543143	3.99952	0.861652	1
Solyc01g110035	SL3.0ch01	96766220	96768220	-	377	437	478	378	46.314	55.841	9.52663	0.000438002	0	-3.91086	1	1
Solyc01g110110	SL3.0ch01	96801920	96803920	+	1419	845	1409	726	62.677	65.995	3.31864	0.0414958	0	-3.41138	1	1
Solyc01g110140	SL3.0ch01	96833757	96835757	-	1238	422	1348	338	74.578	79.953	5.37424	0.000859019	-4.61782	-3.61882	0.244782	1
Solyc01g110145	SL3.0ch01	96833499	96835499	-	1195	351	1250	298	77.296	80.749	3.45311	0.035478	0	-3.91086	1	1
Solyc01g110255	SL3.0ch01	96898429	96900429	+	1348	851	1066	534	61.301	66.625	5.32441	0.00250424	0	-3.91086	1	1
Solyc01g110440	SL3.0ch01	97057950	97059950	+	1002	1359	879	1008	42.44	46.582	4.14223	0.0163998	0.127527	4.56855	0.855784	1
Solyc01g110500	SL3.0ch01	97102098	97104098	+	36	139	52	93	20.571	35.862	15.2906	0.00665827	-1.80903	-3.05391	0.593247	1
Solyc01g110520	SL3.0ch01	97109149	97111149	-	470	1098	566	1039	29.974	35.265	5.29031	0.00463125	0	-3.91086	1	1
Solyc01g110680	SL3.0ch01	97215231	97217231	-	14	24	55	4	36.842	93.22	56.3782	2.72687e-08	0.206456	2.05677	0.756177	1
Solyc01g110682	SL3.0ch01	97216282	97218282	-	181	40	198	6	81.9	97.059	15.1584	1.61828e-06	0.349537	0.36048	0.60217	1
Solyc01g110785	SL3.0ch01	97261107	97263107	-	1	32	7	16	3.03	30.435	27.4045	0.0136591	4.35513	-3.65713	0.29491	1
Solyc01g110790	SL3.0ch01	97261449	97263449	-	1	32	7	16	3.03	30.435	27.4045	0.0136591	3.59757	-3.45197	0.467607	1
Solyc01g110913	SL3.0ch01	97304789	97306789	+	147	276	161	131	34.752	55.137	20.3852	5.95517e-07	-0.317319	-1.2272	0.828862	1
Solyc01g110920	SL3.0ch01	97311377	97313377	+	213	687	207	387	23.667	34.848	11.1818	1.93656e-05	-0.141955	3.02706	0.801478	1
Solyc01g110950	SL3.0ch01	97319601	97321601	-	243	670	323	517	26.616	38.452	11.8368	1.06628e-06	-1.5843	-2.94098	0.514897	1
Solyc01g110970	SL3.0ch01	97323254	97325254	+	306	69	394	35	81.6	91.841	10.2415	0.000101341	1.30805	-1.97997	0.435521	1
Solyc01g111080	SL3.0ch01	97379465	97381465	-	734	771	781	616	48.771	55.906	7.13475	0.000504124	-0.143376	2.64519	0.812222	1
Solyc01g111040	SL3.0ch01	97359988	97361988	+	1762	569	1622	436	75.59	78.814	3.22451	0.0236844	0	-3.91086	1	1
Solyc01g111050	SL3.0ch01	97363174	97365174	+	243	319	172	119	43.238	59.107	15.8681	7.14172e-05	0	-3.91086	1	1
Solyc01g111075	SL3.0ch01	97379463	97381463	-	734	771	781	616	48.771	55.906	7.13475	0.000504124	0	-3.91086	1	1
Solyc01g111130	SL3.0ch01	97418621	97420621	-	1815	434	1777	229	80.703	88.584	7.88171	2.14684e-11	-0.137418	4.06801	0.723992	1
Solyc01g111140	SL3.0ch01	97418200	97420200	+	1961	710	1923	484	73.418	79.892	6.47379	4.61656e-07	0.0149325	4.92935	0.961537	1
Solyc01g111150	SL3.0ch01	97424482	97426482	+	62	263	91	178	19.077	33.829	14.7521	0.000215957	0.058882	7.66978	0.838919	1
Solyc01g111275	SL3.0ch01	97501999	97503999	-	657	696	878	684	48.559	56.21	7.65123	0.000191922	1.78816	-3.87428	1	1
Solyc01g111300	SL3.0ch01	97502328	97504328	-	657	795	881	784	45.248	52.913	7.66498	0.00010885	0.0201009	6.87334	0.937352	1
Solyc01g111340	SL3.0ch01	97534980	97536980	-	103	331	118	237	23.733	33.239	9.50672	0.00807237	1.37196	3.16949	0.0290713	0.798022
Solyc01g111410	SL3.0ch01	97579929	97581929	+	1245	634	1220	490	66.259	71.345	5.08638	0.00309105	-0.124986	4.59023	0.646094	1
Solyc01g111420	SL3.0ch01	97586795	97588795	+	93	103	47	13	47.449	78.333	30.8844	0.000124337	0.474095	5.24045	0.113979	1
Solyc01g111460	SL3.0ch01	97606609	97608609	-	86	31	82	6	73.504	93.182	19.6775	0.00079331	0.207185	0.971435	0.69392	1
Solyc01g111540	SL3.0ch01	97684332	97686332	+	1086	722	1130	631	60.066	64.168	4.10171	0.0237603	0	-3.06708	1	1
Solyc01g111560	SL3.0ch01	97699923	97701923	+	1054	849	912	623	55.386	59.414	4.02745	0.03427	-0.116408	6.3453	0.687414	1
Solyc01g111620	SL3.0ch01	97756969	97758969	-	392	675	472	478	36.739	49.684	12.9457	4.75992e-08	0.450911	4.63306	0.186607	1
Solyc01g111660	SL3.0ch01	97777721	97779721	+	1745	979	1461	711	64.06	67.265	3.20499	0.0363514	-0.933267	1.45178	0.153267	1
Solyc01g111670	SL3.0ch01	97780606	97782606	+	42	475	51	260	8.124	16.399	8.27492	0.00130967	0.498619	3.93135	0.19009	1
Solyc01g111680	SL3.0ch01	97791756	97793756	-	16	462	52	327	3.347	13.72	10.373	2.91334e-07	0.131351	4.93483	0.658077	1
Solyc01g111730	SL3.0ch01	97828141	97830141	+	530	617	514	466	46.207	52.449	6.24148	0.0109925	0.452348	6.26463	0.0871505	1
Solyc01g111760	SL3.0ch01	97851575	97853575	+	1097	923	1059	628	54.307	62.774	8.46722	1.65727e-06	-0.0405348	7.20229	0.888841	1
Solyc01g111850	SL3.0ch01	97926160	97928160	-	4	142	41	209	2.74	16.4	13.6603	6.24003e-05	0	-3.91086	1	1
Solyc01g111870	SL3.0ch01	97953052	97955052	-	1059	883	1172	757	54.531	60.757	6.22546	0.000387159	-0.259218	1.52571	0.619813	1
Solyc01g111937	SL3.0ch01	98004525	98006525	-	428	831	351	458	33.995	43.387	9.39166	9.27061e-05	-0.217667	1.22274	0.716746	1
Solyc01g111940	SL3.0ch01	98008403	98010403	+	892	622	851	495	58.917	63.224	4.30759	0.0353891	0.0321298	6.00312	0.904259	1
Solyc01g111990	SL3.0ch01	98034949	98036949	+	1304	1093	1245	881	54.401	58.561	4.15934	0.0120596	-0.254494	4.88151	0.475226	1
Solyc01g112050	SL3.0ch01	98086302	98088302	-	1223	654	1095	481	65.157	69.48	4.32253	0.0157151	0.694611	5.19062	0.102464	1
Solyc01g112060	SL3.0ch01	98092695	98094695	-	0	11	10	10	0	50	50	0.0114417	-0.991269	4.08605	0.112884	1
Solyc01g112090	SL3.0ch01	98104677	98106677	+	1525	282	1350	138	84.394	90.726	6.33178	4.83023e-07	-0.152662	0.69044	0.830559	1
Solyc01g112130	SL3.0ch01	98138013	98140013	-	8	22	38	9	26.667	80.851	54.1844	1.98511e-05	0.94893	2.86058	0.140478	1
Solyc01g112170	SL3.0ch01	98154497	98156497	-	438	705	436	565	38.32	43.556	5.23623	0.0295548	0.217209	5.04758	0.412802	1
Solyc01g112210	SL3.0ch01	98179399	98181399	-	1338	491	1410	393	73.155	78.203	5.04827	0.00143907	-0.0239188	4.7466	0.935732	1
Solyc01g112220	SL3.0ch01	98186238	98188238	-	1022	517	923	339	66.407	73.138	6.73112	0.000496347	0.524814	4.29869	0.281521	1
Solyc01g112290	SL3.0ch01	98263819	98265819	+	1363	95	1854	82	93.484	95.764	2.28024	0.00925603	-0.081688	7.38037	0.78958	1
Solyc01g112310	SL3.0ch01	98292229	98294229	+	420	20	764	15	95.455	98.074	2.61991	0.0235782	0.067201	2.46642	0.87691	1
Solyc02g044050	SL3.0ch02	145085	147085	+	1320	206	1197	122	86.501	90.751	4.24991	0.00136538	0.187959	-0.492504	0.89302	1
Solyc02g044045	SL3.0ch02	152496	154496	+	339	50	294	20	87.147	93.631	6.48404	0.011757	0	-3.91086	1	1
Solyc02g043950	SL3.0ch02	406114	408114	+	1295	147	892	64	89.806	93.305	3.49961	0.00792768	0	-3.91086	1	1
Solyc02g043940	SL3.0ch02	647993	649993	-	564	404	739	386	58.264	65.689	7.42443	0.00163298	0	-3.7647	1	1
Solyc02g043880	SL3.0ch02	1123715	1125715	+	846	138	778	83	85.976	90.36	4.38444	0.00967952	0	-3.91086	1	1
Solyc02g055565	SL3.0ch02	2234518	2236518	+	1722	427	1682	252	80.13	86.97	6.83972	4.66338e-08	0.271959	3.64097	0.422605	1
Solyc02g055550	SL3.0ch02	2246656	2248656	+	105	113	107	54	48.165	66.46	18.2945	0.00173034	-0.0354533	3.60339	0.923417	1
Solyc02g055467	SL3.0ch02	2629887	2631887	-	0	11	8	12	0	40	40	0.0478411	-0.0620325	1.89532	0.898292	1
Solyc02g050207	SL3.0ch02	4567236	4569236	+	1029	55	989	27	94.926	97.343	2.41632	0.0109594	-0.279883	2.59809	0.502672	1
Solyc02g050247	SL3.0ch02	4744389	4746389	-	667	65	596	33	91.12	94.754	3.63336	0.0229986	0	-3.91086	1	1
Solyc02g050280	SL3.0ch02	4941771	4943771	+	650	419	689	350	60.804	66.314	5.50927	0.018527	0.101781	4.31319	0.773949	1
Solyc02g005140	SL3.0ch02	6942718	6944718	+	826	495	822	329	62.528	71.416	8.88777	1.84372e-05	1.18524	1.51379	0.0145983	0.585025
Solyc02g005180	SL3.0ch02	7346733	7348733	+	1409	117	1303	68	92.333	95.04	2.70722	0.00750702	-0.2677	2.84188	0.533787	1
Solyc02g005410	SL3.0ch02	8621839	8623839	-	994	226	1063	128	81.475	89.253	7.77732	6.32971e-07	0	-3.91086	1	1
Solyc02g005423	SL3.0ch02	8768872	8770872	+	960	175	687	81	84.581	89.453	4.87163	0.00658268	0	-3.91086	1	1
Solyc02g005427	SL3.0ch02	8785741	8787741	+	606	211	594	123	74.174	82.845	8.67138	0.000187575	0	-3.91086	1	1
Solyc02g005510	SL3.0ch02	9452499	9454499	-	601	451	596	318	57.129	65.208	8.0786	0.000909553	-0.0737905	4.96667	0.803853	1
Solyc02g010610	SL3.0ch02	13293957	13295957	+	656	111	691	59	85.528	92.133	6.6053	0.000197734	0	-3.91086	1	1
Solyc02g010620	SL3.0ch02	13294291	13296291	+	525	100	567	49	84	92.045	8.04545	8.11494e-05	0	-3.91086	1	1
Solyc02g011710	SL3.0ch02	14130087	14132087	-	1080	454	1047	359	70.404	74.467	4.0624	0.0287088	0	-3.91086	1	1
Solyc02g011740	SL3.0ch02	14134400	14136400	-	682	1105	688	745	38.165	48.011	9.84664	2.00195e-07	0	-3.83298	1	1
Solyc02g011750	SL3.0ch02	14134724	14136724	-	708	464	723	327	60.41	68.857	8.44759	0.000166794	1.89999	-3.72213	1	1
Solyc02g011755	SL3.0ch02	14135752	14137752	-	1127	484	1209	395	69.957	75.374	5.41752	0.00185721	0	-3.91086	1	1
Solyc02g011760	SL3.0ch02	14136351	14138351	-	1077	431	1207	352	71.419	77.421	6.00233	0.000620072	0	-3.76338	1	1
Solyc02g011770	SL3.0ch02	14137047	14139047	-	1151	541	1339	400	68.026	76.998	8.97227	4.70585e-08	0	-3.91086	1	1
Solyc02g011780	SL3.0ch02	14137788	14139788	-	767	629	915	456	54.943	66.74	11.7969	2.75338e-09	0	-3.91086	1	1
Solyc02g011790	SL3.0ch02	14138520	14140520	-	687	859	683	580	44.437	54.078	9.64034	2.69748e-06	0	-3.91086	1	1
Solyc02g011800	SL3.0ch02	14140166	14142166	-	1072	12261	1127	8333	8.04	11.913	3.87312	1.59022e-20	3.15496	-3.76317	0.388894	1
Solyc02g011810	SL3.0ch02	14141055	14143055	-	1538	11205	1583	7716	12.069	17.023	4.95396	2.28325e-23	-2.15098	-3.60876	0.576562	1
Solyc02g011815	SL3.0ch02	14142273	14144273	-	1568	5137	1472	3908	23.386	27.361	3.97506	4.43689e-06	-1.81202	-2.99036	1	1
Solyc02g011820	SL3.0ch02	14143632	14145632	-	1390	5011	1373	3778	21.715	26.655	4.93966	8.38015e-09	0	-3.91086	1	1
Solyc02g011830	SL3.0ch02	14143887	14145887	-	1714	395	1635	308	81.271	84.148	2.87748	0.0305959	0	-3.91086	1	1
Solyc02g011860	SL3.0ch02	14146929	14148929	-	792	290	778	200	73.198	79.55	6.35232	0.00233389	0	-3.91086	1	1
Solyc02g011877	SL3.0ch02	14157093	14159093	+	476	508	573	384	48.374	59.875	11.5006	3.03118e-06	0	-3.91086	1	1
Solyc02g011900	SL3.0ch02	14159202	14161202	+	1369	167	1271	117	89.128	91.571	2.443	0.0486192	0	-3.91086	1	1
Solyc02g011910	SL3.0ch02	14160773	14162773	+	766	842	719	509	47.637	58.55	10.9137	8.01094e-08	0	-3.91086	1	1
Solyc02g011930	SL3.0ch02	14174068	14176068	-	1334	400	1434	346	76.932	80.562	3.62985	0.0196019	0	-3.53447	1	1
Solyc02g011940	SL3.0ch02	14175411	14177411	-	765	1781	753	1111	30.047	40.397	10.3499	2.18079e-11	0	-3.91086	1	1
Solyc02g011950	SL3.0ch02	14175243	14177243	-	839	738	890	417	53.202	68.095	14.8926	9.52985e-15	0	-3.91086	1	1
Solyc02g011960	SL3.0ch02	14176237	14178237	-	1465	9151	1203	6463	13.8	15.693	1.89274	0.00124126	0	-3.91086	1	1
Solyc02g011970	SL3.0ch02	14176742	14178742	-	1639	9170	1382	6507	15.163	17.518	2.35477	8.34228e-05	0	-3.91086	1	1
Solyc02g011975	SL3.0ch02	14175175	14177175	+	843	745	910	425	53.086	68.165	15.0792	2.46896e-15	0	-3.91086	1	1
Solyc02g011980	SL3.0ch02	14175534	14177534	+	793	2931	782	1970	21.294	28.416	7.12139	7.21603e-10	-3.6358	-3.05074	0.169175	1
Solyc02g011985	SL3.0ch02	14175787	14177787	+	1187	9103	1082	6449	11.535	14.367	2.83181	2.2418e-07	1.90132	-3.87171	1	1
Solyc02g011990	SL3.0ch02	14181961	14183961	-	1693	4765	1393	3543	26.216	28.221	2.00569	0.0324431	3.5952	-3.61885	0.400472	1
Solyc02g012020	SL3.0ch02	14191350	14193350	-	457	505	483	424	47.505	53.252	5.74728	0.027544	0	-3.91086	1	1
Solyc02g014030	SL3.0ch02	15288982	15290982	+	655	630	740	281	50.973	72.478	21.5052	2.75228e-24	0.806375	2.70023	0.448206	1
Solyc02g014040	SL3.0ch02	15342533	15344533	-	285	42	284	18	87.156	94.04	6.88377	0.00976761	1.78674	-3.44171	1	1
Solyc02g014070	SL3.0ch02	15373977	15375977	-	574	432	513	290	57.058	63.885	6.82778	0.00805682	0.571077	-3.46725	0.834012	1
Solyc02g014073	SL3.0ch02	15374867	15376867	-	1132	495	1014	335	69.576	75.167	5.59088	0.00234364	0	-3.91086	1	1
Solyc02g014150	SL3.0ch02	15676471	15678471	+	644	294	677	210	68.657	76.325	7.66797	0.00104673	-0.415498	5.40183	0.172135	1
Solyc02g014310	SL3.0ch02	16217902	16219902	-	1157	297	1013	201	79.574	83.443	3.86957	0.0223976	0.161125	8.31821	0.600568	1
Solyc02g014360	SL3.0ch02	16308848	16310848	-	1170	185	1149	134	86.347	89.556	3.20887	0.0242632	0.374895	3.08917	0.317242	1
Solyc02g014420	SL3.0ch02	16751804	16753804	+	1035	156	1046	118	86.902	89.863	2.96078	0.0488915	0	-3.91086	1	1
Solyc02g014470	SL3.0ch02	17112667	17114667	-	399	388	383	273	50.699	58.384	7.68529	0.00872935	0.878973	-2.22933	0.62166	1
Solyc02g014730	SL3.0ch02	18462682	18464682	-	730	697	740	515	51.156	58.964	7.80787	0.000230882	-2.47308	-1.6078	0.148915	1
Solyc02g014777	SL3.0ch02	19007003	19009003	+	242	217	305	138	52.723	68.849	16.1254	5.8542e-06	0	-3.91086	1	1
Solyc02g014780	SL3.0ch02	19010209	19012209	-	922	2370	861	1283	28.007	40.159	12.1513	7.09993e-19	0	-3.91086	1	1
Solyc02g014790	SL3.0ch02	19010734	19012734	-	898	1630	723	957	35.522	43.036	7.51356	6.86182e-06	0	-3.91086	1	1
Solyc02g014800	SL3.0ch02	19011085	19013085	-	813	1251	719	755	39.39	48.779	9.3893	2.67688e-07	0	-3.91086	1	1
Solyc02g020940	SL3.0ch02	20863182	20865182	+	295	258	413	147	53.345	73.75	20.4046	2.64303e-11	-0.725338	4.84552	0.352554	1
Solyc02g021210	SL3.0ch02	22685880	22687880	+	162	357	232	287	31.214	44.701	13.4875	5.24139e-05	0.403883	-1.51568	0.802056	1
Solyc02g021230	SL3.0ch02	22719046	22721046	+	747	827	737	687	47.459	51.756	4.29691	0.0354922	-0.104239	1.92965	0.822926	1
Solyc02g021290	SL3.0ch02	22894112	22896112	-	590	772	601	476	43.319	55.803	12.4845	1.09766e-08	1.14029	-0.315193	0.355713	1
Solyc02g021330	SL3.0ch02	22974829	22976829	-	395	186	417	115	67.986	78.383	10.3972	0.000457316	-4.61555	-3.58185	0.236313	1
Solyc02g021380	SL3.0ch02	23063691	23065691	+	627	269	718	239	69.978	75.026	5.04844	0.0313556	0	-3.91086	1	1
Solyc02g021390	SL3.0ch02	23091859	23093859	+	621	42	801	31	93.665	96.274	2.60888	0.0391924	0	-3.91086	1	1
Solyc02g021430	SL3.0ch02	23198558	23200558	+	601	54	484	24	91.756	95.276	3.51987	0.0337496	-0.949764	1.0308	0.165085	1
Solyc02g021450	SL3.0ch02	23239759	23241759	+	616	455	686	388	57.516	63.873	6.35703	0.00683195	0	-3.91086	1	1
Solyc02g021630	SL3.0ch02	23802646	23804646	+	1388	188	1378	88	88.071	93.997	5.92621	1.0165e-07	-1.761	-1.96348	0.269057	1
Solyc02g022890	SL3.0ch02	24859150	24861150	+	825	331	739	85	71.367	89.684	18.3177	1.55396e-22	3.77868	-0.0202057	0.00328893	0.243056
Solyc02g022934	SL3.0ch02	24958395	24960395	-	1212	631	1089	433	65.762	71.551	5.78825	0.00120031	0.0127812	0.774825	0.989346	1
Solyc02g023930	SL3.0ch02	25015051	25017051	+	117109	3744	68596	1438	96.902	97.947	1.04469	3.16718e-41	-0.659109	-2.26339	0.789097	1
Solyc02g023940	SL3.0ch02	25026697	25028697	-	1234	226	1327	74	84.521	94.718	10.1975	4.08928e-18	0	-3.91086	1	1
Solyc02g030080	SL3.0ch02	25542252	25544252	-	826	444	1076	403	65.039	72.752	7.71249	6.952e-05	0.126006	6.15283	0.66891	1
Solyc02g030095	SL3.0ch02	25589312	25591312	-	1380	155	1311	94	89.902	93.31	3.40733	0.00273105	0	-3.91086	1	1
Solyc02g030137	SL3.0ch02	25687601	25689601	-	164	1458	408	974	10.111	29.522	19.4115	6.40379e-40	2.70203	-3.79728	0.647602	1
Solyc02g030180	SL3.0ch02	25742641	25744641	+	2702	117	2352	66	95.85	97.27	1.42088	0.012043	0	-3.91086	1	1
Solyc02g030210	SL3.0ch02	25785776	25787776	+	2148	552	1573	336	79.556	82.399	2.84361	0.0319577	0.0530192	4.68785	0.851745	1
Solyc02g030280	SL3.0ch02	25959902	25961902	-	478	98	442	41	82.986	91.511	8.52528	0.000167938	0	-3.91086	1	1
Solyc02g030290	SL3.0ch02	25961246	25963246	-	188	71	200	26	72.587	88.496	15.9087	6.58449e-05	1.7882	-3.87428	1	1
Solyc02g030300	SL3.0ch02	25959826	25961826	+	478	98	442	41	82.986	91.511	8.52528	0.000167938	-0.0102963	6.161	0.973408	1
Solyc02g030430	SL3.0ch02	26324787	26326787	-	463	58	608	39	88.868	93.972	5.10462	0.00518584	0	-3.91086	1	1
Solyc02g030460	SL3.0ch02	26424439	26426439	-	29	104	134	83	21.805	61.751	39.9466	3.06857e-12	0	-3.91086	1	1
Solyc02g030540	SL3.0ch02	26805800	26807800	+	419	57	580	41	88.025	93.398	5.37254	0.00680968	0	-3.91086	1	1
Solyc02g030600	SL3.0ch02	26962669	26964669	+	990	185	1054	130	84.255	89.02	4.76495	0.00216918	0	-3.91086	1	1
Solyc02g031790	SL3.0ch02	27475843	27477843	+	674	801	882	834	45.695	51.399	5.70369	0.0039523	4.19665	-0.198362	0.0206464	0.681096
Solyc02g031860	SL3.0ch02	27579234	27581234	-	1575	207	1234	118	88.384	91.272	2.88835	0.019378	0.649096	6.59509	0.158916	1
Solyc02g031930	SL3.0ch02	27666598	27668598	-	1068	378	1118	55	73.859	95.311	21.4522	2.57034e-52	1.81481	-3.80181	1	1
Solyc02g032030	SL3.0ch02	27794086	27796086	-	936	323	905	249	74.345	78.423	4.07816	0.0350437	-2.39316	-3.1083	0.338243	1
Solyc02g032070	SL3.0ch02	27924165	27926165	+	708	85	832	48	89.281	94.545	5.26424	0.00036366	1.90087	-3.68456	1	1
Solyc02g032155	SL3.0ch02	28173044	28175044	+	277	81	223	28	77.374	88.845	11.4703	0.000892621	0	-3.91086	1	1
Solyc02g032160	SL3.0ch02	28219593	28221593	+	280	66	183	16	80.925	91.96	11.0349	0.00148921	0	-3.91086	1	1
Solyc02g032173	SL3.0ch02	28293282	28295282	+	730	117	748	83	86.187	90.012	3.82549	0.0304906	0	-3.91086	1	1
Solyc02g032180	SL3.0ch02	28384211	28386211	+	842	105	1023	84	88.912	92.412	3.49957	0.0159308	0	-3.91086	1	1
Solyc02g032280	SL3.0ch02	28574725	28576725	+	1039	131	876	58	88.803	93.79	4.98673	0.000267106	0	-3.91086	1	1
Solyc02g032330	SL3.0ch02	28696739	28698739	+	1279	1251	1227	1014	50.553	54.752	4.19898	0.00971875	0.162772	5.02073	0.570611	1
Solyc02g032335	SL3.0ch02	28740786	28742786	+	691	94	644	51	88.025	92.662	4.63639	0.00725095	0	-3.91086	1	1
Solyc02g032370	SL3.0ch02	28868863	28870863	-	967	75	840	33	92.802	96.22	3.41763	0.00389868	-0.413769	-2.78237	0.842282	1
Solyc02g032430	SL3.0ch02	28949847	28951847	-	613	66	745	34	90.28	95.635	5.35561	0.000285276	0	-3.8312	1	1
Solyc02g032553	SL3.0ch02	29157113	29159113	-	369	45	444	27	89.13	94.268	5.13708	0.0144402	0	-3.91086	1	1
Solyc02g032565	SL3.0ch02	29192324	29194324	-	428	240	471	106	64.072	81.629	17.5573	6.00481e-11	0	-3.91086	1	1
Solyc02g032590	SL3.0ch02	29272837	29274837	-	315	51	478	35	86.066	93.177	7.11181	0.00233925	0	-3.91086	1	1
Solyc02g032600	SL3.0ch02	29306794	29308794	+	2174	439	2119	224	83.199	90.44	7.24022	1.12466e-12	0	-3.91086	1	1
Solyc02g032650	SL3.0ch02	29382218	29384218	+	979	539	912	419	64.493	68.52	4.02716	0.0417037	1.95891	1.55506	0.0248837	0.749192
Solyc02g032770	SL3.0ch02	29634904	29636904	-	980	76	853	40	92.803	95.521	2.71769	0.0246928	0	-3.91086	1	1
Solyc02g032820	SL3.0ch02	29841714	29843714	+	1405	1646	1216	1170	46.05	50.964	4.91348	0.00117669	0.00546964	-0.739946	1	1
Solyc02g032840	SL3.0ch02	29879984	29881984	-	1166	256	981	148	81.997	86.891	4.89387	0.00259354	-1.75006	-1.00448	0.174286	1
Solyc02g032910	SL3.0ch02	29938983	29940983	+	892	412	919	298	68.405	75.514	7.10865	0.000331335	-2.2602	3.18158	0.00197977	0.173986
Solyc02g032950	SL3.0ch02	29973794	29975794	-	793	1030	724	723	43.5	50.035	6.53483	0.000770044	1.08812	0.698951	0.36993	1
Solyc02g032990	SL3.0ch02	30075506	30077506	+	508	64	485	30	88.811	94.175	5.36357	0.00465078	0	-3.91086	1	1
Solyc02g033040	SL3.0ch02	30182330	30184330	+	1071	250	856	124	81.075	87.347	6.272	0.000216896	0.851454	-0.576916	0.280668	1
Solyc02g033090	SL3.0ch02	30222725	30224725	-	507	92	540	49	84.641	91.681	7.03975	0.000789804	0	-3.91086	1	1
Solyc02g033110	SL3.0ch02	30374625	30376625	-	447	41	440	20	91.598	95.652	4.05381	0.0237212	0	-3.91086	1	1
Solyc02g036135	SL3.0ch02	30582057	30584057	+	562	71	697	58	88.784	92.318	3.53431	0.0450952	0	-3.91086	1	1
Solyc02g036220	SL3.0ch02	30839649	30841649	-	272	177	242	99	60.579	70.968	10.3887	0.00667705	-0.0149321	-3.80295	1	1
Solyc02g036300	SL3.0ch02	30973026	30975026	-	2	92	38	181	2.128	17.352	15.2239	0.0002874	0.191425	2.91529	0.626424	1
Solyc02g036360	SL3.0ch02	31059311	31061311	-	701	169	933	117	80.575	88.857	8.28243	3.2783e-06	0.173127	4.22614	0.578752	1
Solyc02g036370	SL3.0ch02	31085374	31087374	-	417	914	446	540	31.33	45.233	13.9034	1.69784e-10	0.244145	4.70401	0.461791	1
Solyc02g036380	SL3.0ch02	31147953	31149953	+	819	766	795	627	51.672	55.907	4.23525	0.0380371	0.412471	5.58307	0.180767	1
Solyc02g036460	SL3.0ch02	31281288	31283288	+	1006	307	850	197	76.618	81.184	4.56591	0.0161538	3.24604	-3.72007	0.381654	1
Solyc02g037490	SL3.0ch02	31389407	31391407	-	1171	581	1160	446	66.838	72.229	5.39124	0.002296	-5.02134	-2.35892	0.00281883	0.221591
Solyc02g037495	SL3.0ch02	31441230	31443230	+	417	896	448	628	31.759	41.636	9.87636	4.69193e-06	0.657731	8.44593	0.181617	1
Solyc02g037500	SL3.0ch02	31443839	31445839	-	83	594	69	324	12.26	17.557	5.29728	0.0340625	0	-3.91086	1	1
Solyc02g037530	SL3.0ch02	31523939	31525939	+	1201	368	1176	246	76.546	82.7	6.15485	0.000166311	-0.476027	4.50303	0.195014	1
Solyc02g037550	SL3.0ch02	31574092	31576092	-	351	585	377	405	37.5	48.21	10.7097	4.43033e-05	-4.18543	-3.46198	0.171796	1
Solyc02g037590	SL3.0ch02	31637870	31639870	-	154	551	198	439	21.844	31.083	9.23923	0.000568966	0.314595	0.18782	0.640839	1
Solyc02g038690	SL3.0ch02	31799117	31801117	-	1279	464	1531	245	73.379	86.205	12.8257	7.17228e-20	-0.139109	0.63041	0.844337	1
Solyc00g007150	SL3.0ch02	32642176	32644176	-	82	496	57	184	14.187	23.651	9.4646	0.00415792	0.032155	0.275022	0.96474	1
Solyc00g007130	SL3.0ch02	32650149	32652149	+	370	378	343	274	49.465	55.592	6.12633	0.0446953	-0.00383556	0.323957	1	1
Solyc00g007110	SL3.0ch02	32678253	32680253	-	2078	423	2111	336	83.087	86.269	3.18214	0.00555142	1.10147	1.15981	0.17502	1
Solyc00g007070	SL3.0ch02	32697141	32699141	+	155	384	201	332	28.757	37.711	8.95411	0.00601579	-0.0156983	6.37723	0.953285	1
Solyc02g061630	SL3.0ch02	33677739	33679739	-	418	52	676	51	88.936	92.985	4.0487	0.0363619	0	-3.91086	1	1
Solyc02g061650	SL3.0ch02	33702271	33704271	+	284	457	268	335	38.327	44.444	6.11786	0.0448521	0	-3.87249	1	1
Solyc02g061720	SL3.0ch02	33791675	33793675	-	866	169	813	59	83.671	93.234	9.56245	9.9561e-10	0	-3.91086	1	1
Solyc02g061820	SL3.0ch02	33893258	33895258	-	5	56	89	39	8.197	69.531	61.3345	5.74477e-15	-0.237676	4.59001	0.431809	1
Solyc02g061880	SL3.0ch02	33991225	33993225	-	26	158	23	60	14.13	27.711	13.5804	0.0214342	0	-3.91086	1	1
Solyc02g061950	SL3.0ch02	34041360	34043360	-	1722	621	1622	412	73.496	79.744	6.24883	7.80995e-06	0.386147	2.7748	0.376361	1
Solyc02g062030	SL3.0ch02	34154519	34156519	+	726	846	722	682	46.183	51.425	5.2413	0.0109883	2.31773	-3.30537	0.520274	1
Solyc02g062150	SL3.0ch02	34260140	34262140	-	319	266	311	175	54.53	63.992	9.46186	0.00498688	0	-3.91086	1	1
Solyc02g062160	SL3.0ch02	34277995	34279995	-	1203	564	1254	455	68.081	73.376	5.29475	0.00194682	2.57097	-3.2984	0.580794	1
Solyc02g062180	SL3.0ch02	34289037	34291037	-	733	928	865	812	44.13	51.58	7.45016	8.62191e-05	-0.0203534	4.46322	0.947203	1
Solyc02g062210	SL3.0ch02	34344340	34346340	-	940	423	899	269	68.966	76.969	8.00366	4.11907e-05	0	-3.91086	1	1
Solyc02g062240	SL3.0ch02	34396889	34398889	-	1806	873	1795	733	67.413	71.005	3.59153	0.0121101	0.191994	3.97526	0.643451	1
Solyc02g062260	SL3.0ch02	34410343	34412343	+	193	248	153	126	43.764	54.839	11.0745	0.0108141	0	-3.91086	1	1
Solyc02g062270	SL3.0ch02	34412357	34414357	+	120	275	109	157	30.38	40.977	10.5977	0.0134192	0.101368	5.46408	0.746066	1
Solyc02g062350	SL3.0ch02	34502588	34504588	-	592	513	662	411	53.575	61.696	8.12152	0.000529946	-0.296941	5.28881	0.349314	1
Solyc02g062375	SL3.0ch02	34521205	34523205	+	121	15	85	1	88.971	98.837	9.86662	0.0135584	0.468965	4.06937	0.217407	1
Solyc02g062380	SL3.0ch02	34527199	34529199	-	94	830	92	417	10.173	18.075	7.9015	0.000165357	0	-3.91086	1	1
Solyc02g062430	SL3.0ch02	34569089	34571089	+	11	66	84	28	14.286	75	60.7143	9.82376e-16	-0.0152122	4.75246	0.957629	1
Solyc02g062530	SL3.0ch02	34768103	34770103	-	2960	493	2644	339	85.723	88.636	2.91304	0.00171317	-0.261579	4.80444	0.428195	1
Solyc02g062680	SL3.0ch02	34952321	34954321	-	1835	813	1546	491	69.298	75.896	6.59834	4.01119e-06	0.0477643	4.29996	0.88629	1
Solyc02g062700	SL3.0ch02	34972265	34974265	+	1334	250	1226	176	84.217	87.447	3.22933	0.0239311	0.106848	4.31323	0.793097	1
Solyc02g062760	SL3.0ch02	35081615	35083615	+	926	459	984	401	66.859	71.047	4.18773	0.0354212	-0.194491	-3.32567	1	1
Solyc02g062920	SL3.0ch02	35403711	35405711	+	262	816	350	759	24.304	31.56	7.2557	0.000634334	0.208542	6.44376	0.437428	1
Solyc02g062930	SL3.0ch02	35415210	35417210	+	586	1093	625	981	34.902	38.917	4.01484	0.0346723	0.210966	5.5111	0.556836	1
Solyc02g062965	SL3.0ch02	35492932	35494932	+	1293	599	1294	451	68.34	74.155	5.81435	0.000475772	0	-3.91086	1	1
Solyc02g063010	SL3.0ch02	35578098	35580098	-	1563	434	1424	302	78.267	82.503	4.2355	0.00368191	-0.0580835	7.10234	0.827457	1
Solyc02g063040	SL3.0ch02	35610320	35612320	+	1630	617	1647	372	72.541	81.575	9.03387	4.52041e-11	0.537108	2.7324	0.328974	1
Solyc02g063080	SL3.0ch02	35681846	35683846	-	317	5156	261	3065	5.792	7.847	2.05519	0.000708559	1.8976	-3.79399	1	1
Solyc02g063150	SL3.0ch02	35768438	35770438	+	1077	708	1079	550	60.336	66.237	5.90082	0.00129697	-1.00736	6.13351	0.13213	1
Solyc02g063160	SL3.0ch02	35777363	35779363	+	1036	1075	1103	869	49.076	55.933	6.8568	6.74007e-05	-0.163102	3.64337	0.642647	1
Solyc02g063170	SL3.0ch02	35784400	35786400	+	215	309	202	208	41.031	49.268	8.23776	0.0274414	-0.592265	0.607102	0.325588	1
Solyc02g063200	SL3.0ch02	35792897	35794897	+	9	87	36	58	9.375	38.298	28.9229	1.56397e-05	0.696208	-2.14903	0.553888	1
Solyc02g063220	SL3.0ch02	35820017	35822017	-	190	1613	198	1279	10.538	13.406	2.86756	0.0247693	-0.259847	4.39941	0.531756	1
Solyc02g063230	SL3.0ch02	35835956	35837956	+	820	754	738	536	52.097	57.928	5.83122	0.00518584	-0.198122	-2.60229	0.971886	1
Solyc02g063250	SL3.0ch02	35848080	35850080	+	160	284	205	236	36.036	46.485	10.4492	0.00468001	0.879359	3.40635	0.115482	1
Solyc02g063255	SL3.0ch02	35854026	35856026	+	1358	282	1186	67	82.805	94.653	11.848	4.68194e-22	0.0920465	-3.62975	1	1
Solyc02g063440	SL3.0ch02	36082640	36084640	+	477	407	560	317	53.959	63.854	9.89477	0.000120325	0.440409	2.15838	0.600908	1
Solyc02g063510	SL3.0ch02	36150788	36152788	+	28	605	342	1023	4.423	25.055	20.6316	7.99662e-32	-1.41865	1.80662	0.0826673	1
Solyc02g064540	SL3.0ch02	36232810	36234810	-	134	630	174	613	17.539	22.109	4.57001	0.0450165	-0.123218	-2.07963	0.956777	1
Solyc02g064560	SL3.0ch02	36244607	36246607	-	288	887	414	792	24.511	34.328	9.81772	1.38463e-06	-4.16332	-3.39454	0.280589	1
Solyc02g064580	SL3.0ch02	36252151	36254151	+	1547	867	1696	777	64.085	68.581	4.49616	0.00288342	0.0568981	4.5649	0.841366	1
Solyc02g064590	SL3.0ch02	36263580	36265580	+	531	786	490	554	40.319	46.935	6.61596	0.00369662	0.381613	1.29181	0.461038	1
Solyc02g064690	SL3.0ch02	36339740	36341740	-	698	977	691	826	41.672	45.55	3.87879	0.0495028	-0.597054	5.90353	0.167574	1
Solyc02g064840	SL3.0ch02	36535039	36537039	-	932	333	764	218	73.676	77.8	4.12452	0.0453238	0	-3.91086	1	1
Solyc02g065010	SL3.0ch02	36696445	36698445	+	469	370	422	249	55.9	62.891	6.99133	0.0139899	-0.4282	0.792902	0.489503	1
Solyc02g065310	SL3.0ch02	37064432	37066432	-	39	56	158	86	41.053	64.754	23.7015	0.000354075	0	-3.91086	1	1
Solyc02g065330	SL3.0ch02	37064066	37066066	+	45	63	158	96	41.667	62.205	20.5381	0.00159665	1.86305	-3.1731	0.620125	1
Solyc02g065315	SL3.0ch02	37064066	37066066	+	45	63	158	96	41.667	62.205	20.5381	0.00159665	0.860262	-2.87303	0.824707	1
Solyc02g065380	SL3.0ch02	37136466	37138466	-	505	807	415	500	38.491	45.355	6.86434	0.00398451	-0.229905	6.22452	0.497997	1
Solyc02g065390	SL3.0ch02	37135876	37137876	+	510	930	418	552	35.417	43.093	7.67612	0.000649262	-0.552883	-0.728153	0.575898	1
Solyc02g065430	SL3.0ch02	37155451	37157451	+	1219	1133	1224	949	51.828	56.328	4.49943	0.00664869	0.205707	2.87851	0.827824	1
Solyc02g065480	SL3.0ch02	37195506	37197506	-	1267	649	1413	526	66.127	72.873	6.74527	3.51626e-05	0.0192706	-2.3595	1	1
Solyc02g065515	SL3.0ch02	37250972	37252972	+	13	117	22	67	10	24.719	14.7191	0.0109498	-0.268168	-0.391454	0.754654	1
Solyc02g065720	SL3.0ch02	37436348	37438348	+	1798	426	1944	321	80.845	85.828	4.98249	4.56129e-05	0.411143	4.86932	0.170884	1
Solyc02g065740	SL3.0ch02	37461021	37463021	-	576	689	700	607	45.534	53.558	8.02417	0.000215493	1.90131	-3.87171	1	1
Solyc02g065770	SL3.0ch02	37483994	37485994	-	872	1086	829	884	44.535	48.395	3.85939	0.0369324	-0.636428	6.69372	0.2009	1
Solyc02g065800	SL3.0ch02	37513299	37515299	-	71	181	72	97	28.175	42.604	14.4289	0.0062534	0.607467	-0.292317	0.387017	1
Solyc02g066810	SL3.0ch02	37539057	37541057	-	437	588	486	488	42.634	49.897	7.26318	0.0035537	0.622572	0.0192941	0.413479	1
Solyc02g066820	SL3.0ch02	37539590	37541590	-	545	291	621	251	65.191	71.216	6.02421	0.0172701	0.565643	0.183565	0.433527	1
Solyc02g066860	SL3.0ch02	37638233	37640233	+	148	50	139	12	74.747	92.053	17.3055	9.24083e-05	0	-3.91086	1	1
Solyc02g066940	SL3.0ch02	37762236	37764236	-	849	336	768	214	71.646	78.208	6.56217	0.00167657	0.319266	5.711	0.323448	1
Solyc02g066950	SL3.0ch02	37764882	37766882	+	709	132	762	97	84.304	88.708	4.4034	0.0181886	-0.468826	2.01008	0.472391	1
Solyc02g067020	SL3.0ch02	37826479	37828479	+	1917	308	1688	217	86.157	88.609	2.45162	0.0353066	0	-3.87049	1	1
Solyc02g067030	SL3.0ch02	37841247	37843247	-	708	423	684	300	62.599	69.512	6.91273	0.00280007	0.15013	5.07319	0.631121	1
Solyc02g067040	SL3.0ch02	37851438	37853438	+	93	585	129	447	13.717	22.396	8.67902	0.000328104	-0.478761	2.28479	0.610681	1
Solyc02g067050	SL3.0ch02	37857655	37859655	+	9	53	46	50	14.516	47.917	33.4005	7.58284e-05	-6.06543	-1.90427	0.0189571	0.6595
Solyc02g067120	SL3.0ch02	37912619	37914619	-	1811	330	1601	219	84.587	87.967	3.38039	0.00607891	-0.0953025	4.5987	0.783314	1
Solyc02g067130	SL3.0ch02	37911633	37913633	+	596	376	465	178	61.317	72.317	11.0004	2.96068e-05	0	-3.52182	1	1
Solyc02g067150	SL3.0ch02	37917961	37919961	+	2092	322	2017	238	86.661	89.446	2.78453	0.0094405	0	-3.65255	1	1
Solyc02g067230	SL3.0ch02	37984089	37986089	-	721	1038	670	735	40.989	47.687	6.69763	0.000667959	0.854585	2.29509	0.0634567	1
Solyc02g067250	SL3.0ch02	38006043	38008043	+	493	771	604	765	39.003	44.12	5.11663	0.0173447	0.572428	4.80189	0.117875	1
Solyc02g067285	SL3.0ch02	38032639	38034639	-	1774	424	1713	297	80.71	85.224	4.51414	0.000465025	0.321508	1.06146	0.616077	1
Solyc02g067290	SL3.0ch02	38032268	38034268	-	1662	531	1631	206	75.787	88.786	12.9995	1.88337e-25	0.374145	-1.52416	0.688341	1
Solyc02g067300	SL3.0ch02	38032658	38034658	-	1834	397	1772	300	82.205	85.521	3.31595	0.00815688	0	-3.91086	1	1
Solyc02g067460	SL3.0ch02	38224855	38226855	+	864	995	856	810	46.477	51.381	4.90395	0.00907006	-0.0200817	6.93118	0.948738	1
Solyc02g067540	SL3.0ch02	38267873	38269873	+	61	117	64	45	34.27	58.716	24.4459	0.000330706	-0.310656	4.9841	0.31116	1
Solyc02g067600	SL3.0ch02	38310336	38312336	+	669	10073	606	7039	6.228	7.927	1.69886	5.22006e-05	1.14443	-0.948569	0.442451	1
Solyc02g067610	SL3.0ch02	38314482	38316482	+	398	506	371	358	44.027	50.892	6.86508	0.0137762	-0.130079	1.50276	0.870843	1
Solyc02g067720	SL3.0ch02	38411764	38413764	-	1079	442	1228	420	70.94	74.515	3.57439	0.0441416	0	-3.91086	1	1
Solyc02g067730	SL3.0ch02	38416433	38418433	-	1779	577	1681	413	75.509	80.277	4.76764	0.0005749	0	-3.91086	1	1
Solyc02g067770	SL3.0ch02	38459295	38461295	+	1965	461	1847	363	80.998	83.575	2.57713	0.0412574	-0.180187	-2.99051	1	1
Solyc02g067850	SL3.0ch02	38523381	38525381	-	1020	465	1276	429	68.687	74.839	6.15184	0.000496432	0.355129	-1.29175	0.772459	1
Solyc02g068060	SL3.0ch02	38672727	38674727	+	504	400	722	459	55.752	61.135	5.38242	0.0266293	-1.67153	-0.446282	0.161634	1
Solyc02g068080	SL3.0ch02	38697509	38699509	-	1558	1119	841	509	58.199	62.296	4.09682	0.025765	-0.836066	2.84129	0.286673	1
Solyc02g068210	SL3.0ch02	38785616	38787616	+	0	20	20	27	0	42.553	42.5532	0.000930844	-0.937098	-1.90368	0.445176	1
Solyc02g068220	SL3.0ch02	38785834	38787834	+	0	20	20	27	0	42.553	42.5532	0.000930844	0.501203	-1.2038	0.551099	1
Solyc02g068260	SL3.0ch02	38815561	38817561	-	25	40	99	4	38.462	96.117	57.655	1.27373e-15	-0.849841	1.749	0.122644	1
Solyc02g068460	SL3.0ch02	38970170	38972170	-	1267	845	1265	614	59.991	67.323	7.33251	1.12197e-05	2.83632	1.21586	0.151339	1
Solyc02g068600	SL3.0ch02	39134680	39136680	-	1707	231	1476	134	88.08	91.677	3.59652	0.00152907	-2.10806	-1.10214	0.0574555	1
Solyc02g068650	SL3.0ch02	39173820	39175820	-	1593	452	1247	197	77.897	86.357	8.46003	2.31126e-09	0.0575936	4.16827	0.860788	1
Solyc02g068700	SL3.0ch02	39205389	39207389	-	181	73	218	27	71.26	88.98	17.7197	4.62165e-06	-0.0583553	-3.76157	1	1
Solyc02g068990	SL3.0ch02	39515914	39517914	-	938	767	985	673	55.015	59.409	4.39426	0.0223815	0.00112361	3.6706	0.999854	1
Solyc02g068995	SL3.0ch02	39515855	39517855	-	875	758	903	654	53.582	57.996	4.41378	0.0250639	1.89779	-3.72574	1	1
Solyc02g069020	SL3.0ch02	39541801	39543801	-	33	14	64	3	70.213	95.522	25.3096	0.00102312	0.178294	3.68035	0.684474	1
Solyc02g069030	SL3.0ch02	39545239	39547239	-	105	63	194	39	62.5	83.262	20.7618	1.8246e-05	0.348816	1.63358	0.512251	1
Solyc02g069025	SL3.0ch02	39547299	39549299	-	70	67	61	31	51.095	66.304	15.2095	0.0493847	-0.47496	0.360089	0.496064	1
Solyc02g069040	SL3.0ch02	39550246	39552246	-	891	246	731	129	78.364	85	6.63588	0.000634076	0.719016	0.513673	0.343942	1
Solyc02g069045	SL3.0ch02	39560002	39562002	-	272	706	466	882	27.812	34.57	6.75787	0.00192133	1.29173	-2.04312	0.463434	1
Solyc02g069060	SL3.0ch02	39603479	39605479	-	390	135	407	95	74.286	81.076	6.78998	0.0221881	0.501184	3.03693	0.508466	1
Solyc02g069110	SL3.0ch02	39640667	39642667	-	986	647	864	450	60.38	65.753	5.37376	0.00712823	0.30708	4.43289	0.437134	1
Solyc02g069160	SL3.0ch02	39669306	39671306	+	1293	289	1258	201	81.732	86.223	4.49146	0.0024121	0.118997	6.06423	0.663071	1
Solyc02g069210	SL3.0ch02	39731826	39733826	-	418	315	412	157	57.026	72.408	15.3818	1.09824e-07	3.59672	-3.76036	0.440648	1
Solyc02g069280	SL3.0ch02	39785908	39787908	+	157	751	232	445	17.291	34.269	16.9781	2.46107e-13	1.50737	-2.95284	0.534367	1
Solyc02g069320	SL3.0ch02	39817391	39819391	-	762	734	706	558	50.936	55.854	4.9186	0.0213565	0.225713	1.9529	0.659249	1
Solyc02g069330	SL3.0ch02	39823185	39825185	-	349	1440	331	1081	19.508	23.442	3.93382	0.0171195	-4.76969	-3.58662	0.11873	1
Solyc02g069340	SL3.0ch02	39822342	39824342	+	807	1218	717	895	39.852	44.479	4.62706	0.0116693	0.169684	4.92753	0.572747	1
Solyc02g069460	SL3.0ch02	39909397	39911397	-	184	450	234	378	29.022	38.235	9.21321	0.0019846	-0.889907	-1.80943	0.285277	1
Solyc02g069560	SL3.0ch02	39979765	39981765	-	1098	599	962	386	64.702	71.365	6.66257	0.000392329	-0.818955	-1.32587	0.561476	1
Solyc02g069590	SL3.0ch02	40009354	40011354	-	512	416	465	224	55.172	67.489	12.3167	4.13463e-06	0.055562	6.41779	0.841888	1
Solyc02g069610	SL3.0ch02	40018807	40020807	+	1454	577	1112	364	71.59	75.339	3.7484	0.0265183	0.0922942	5.85561	0.746897	1
Solyc02g069860	SL3.0ch02	40249147	40251147	-	51	584	78	445	8.031	14.914	6.88246	0.000863703	-0.105033	3.55182	0.757407	1
Solyc02g069870	SL3.0ch02	40248390	40250390	+	58	455	103	359	11.306	22.294	10.9883	2.44163e-05	0	-3.91086	1	1
Solyc02g069910	SL3.0ch02	40265556	40267556	-	1023	743	987	565	57.928	63.595	5.66784	0.0027896	-0.189329	4.01564	0.709143	1
Solyc02g069935	SL3.0ch02	40281942	40283942	-	322	176	326	91	64.659	78.177	13.5188	4.35692e-05	0.703059	1.04376	0.223938	1
Solyc02g069940	SL3.0ch02	40289141	40291141	-	1924	619	1879	428	75.659	81.448	5.7891	6.53815e-06	0.512078	4.2821	0.183502	1
Solyc02g070020	SL3.0ch02	40379067	40381067	-	471	1399	556	1048	25.187	34.663	9.47618	1.34959e-08	0.692202	8.45392	0.261656	1
Solyc02g070040	SL3.0ch02	40399824	40401824	-	155	166	151	101	48.287	59.921	11.634	0.0152601	-0.0281357	5.56717	0.951744	1
Solyc02g070060	SL3.0ch02	40470758	40472758	-	1459	329	1480	245	81.6	85.797	4.19755	0.00259368	-0.117344	-3.33336	1	1
Solyc02g070100	SL3.0ch02	40501301	40503301	+	1321	430	1394	325	75.443	81.094	5.65105	0.000240115	0.306603	5.68842	0.264633	1
Solyc02g070487	SL3.0ch02	40794850	40796850	-	251	667	405	695	27.342	36.818	9.47613	3.26679e-05	-0.128607	-1.83012	1	1
Solyc02g070560	SL3.0ch02	40864406	40866406	+	173	763	218	666	18.483	24.661	6.17773	0.00394574	-0.123732	4.55935	0.682635	1
Solyc02g070580	SL3.0ch02	40873906	40875906	+	35	355	65	253	8.974	20.44	11.4659	9.36311e-05	-0.0757034	4.02747	0.845942	1
Solyc02g070610	SL3.0ch02	40889440	40891440	-	1183	456	1113	299	72.178	78.824	6.64621	0.000104187	-0.0871625	-1.29452	0.964385	1
Solyc02g070620	SL3.0ch02	40889193	40891193	+	1236	483	1171	337	71.902	77.653	5.75025	0.000712032	-3.06621	-2.44221	0.167659	1
Solyc02g070640	SL3.0ch02	40897154	40899154	+	759	258	611	134	74.631	82.013	7.38215	0.000911344	0.211173	7.01035	0.553507	1
Solyc02g070680	SL3.0ch02	40916620	40918620	+	470	581	515	445	44.719	53.646	8.92652	0.000297338	0.298208	5.31168	0.305745	1
Solyc02g070790	SL3.0ch02	40968061	40970061	-	1107	674	1255	561	62.156	69.108	6.95184	5.9801e-05	-0.580995	2.57236	0.301054	1
Solyc02g070910	SL3.0ch02	41062452	41064452	+	308	573	374	440	34.96	45.946	10.9857	2.85335e-05	-0.441218	1.50827	0.386659	1
Solyc02g070980	SL3.0ch02	41080810	41082810	+	24	98	13	3	19.672	81.25	61.5779	1.17342e-05	-3.87142	0.301856	0.000881248	0.0978897
Solyc02g071120	SL3.0ch02	41163516	41165516	+	1662	689	1542	538	70.693	74.135	3.44129	0.0235173	-0.366996	5.84228	0.234419	1
Solyc02g071145	SL3.0ch02	41215181	41217181	-	2295	514	2224	399	81.702	84.788	3.08674	0.00665303	0	-3.91086	1	1
Solyc02g071150	SL3.0ch02	41215627	41217627	-	1780	463	1747	342	79.358	83.629	4.27053	0.00111996	0	-3.91086	1	1
Solyc02g071170	SL3.0ch02	41223463	41225463	+	115	118	114	35	49.356	76.51	27.1538	1.00371e-06	0.0973924	5.69603	0.7115	1
Solyc02g071290	SL3.0ch02	41351384	41353384	+	49	83	152	51	37.121	74.877	37.7556	1.26309e-10	-3.91231	-3.43214	0.279076	1
Solyc02g071410	SL3.0ch02	41445459	41447459	-	662	597	651	483	52.581	57.407	4.82599	0.0351836	0	-3.91086	1	1
Solyc02g071420	SL3.0ch02	41445670	41447670	+	735	717	710	578	50.62	55.124	4.50439	0.0356312	0	-3.91086	1	1
Solyc02g071510	SL3.0ch02	41484446	41486446	-	402	565	579	168	41.572	77.51	35.9382	1.17004e-49	-0.120011	5.73419	0.684212	1
Solyc02g071583	SL3.0ch02	41542619	41544619	+	20	10	39	3	66.667	92.857	26.1905	0.0218528	0	-3.91086	1	1
Solyc02g071597	SL3.0ch02	41573775	41575775	-	163	640	163	45	20.299	78.365	58.0665	2.16987e-52	0.376552	-2.8518	0.903215	1
Solyc02g071600	SL3.0ch02	41572154	41574154	+	463	898	445	394	34.019	53.039	19.0202	5.74755e-17	0.347341	3.42117	0.319498	1
Solyc02g071710	SL3.0ch02	41648823	41650823	+	530	500	580	414	51.456	58.35	6.89379	0.00548706	0	-3.52551	1	1
Solyc02g071730	SL3.0ch02	41667297	41669297	-	360	126	371	91	74.074	80.303	6.22896	0.0436079	-0.0780358	7.02455	0.807333	1
Solyc02g071740	SL3.0ch02	41683774	41685774	-	276	1495	366	1365	15.584	21.144	5.55943	0.000108154	0.0968378	4.72154	0.839489	1
Solyc02g071770	SL3.0ch02	41696040	41698040	-	107	88	129	63	54.872	67.188	12.3157	0.031229	1.44751	4.48738	0.00393482	0.272282
Solyc02g071790	SL3.0ch02	41709494	41711494	+	1035	509	1280	436	67.034	74.592	7.5584	1.44586e-05	3.3705	-3.77034	0.530598	1
Solyc02g071830	SL3.0ch02	41771324	41773324	-	547	545	554	440	50.092	55.734	5.64283	0.0222613	0.173877	0.39038	0.831475	1
Solyc02g071840	SL3.0ch02	41773439	41775439	-	93	13	705	16	87.736	97.781	10.045	7.36695e-05	0	-3.91086	1	1
Solyc02g071860	SL3.0ch02	41784057	41786057	-	673	616	714	527	52.211	57.534	5.32323	0.0162614	-0.181432	5.93089	0.570576	1
Solyc02g071875	SL3.0ch02	41798595	41800595	-	384	147	352	95	72.316	78.747	6.43082	0.0382983	-0.363255	-0.136328	0.669091	1
Solyc02g071960	SL3.0ch02	41866529	41868529	+	669	688	624	448	49.3	58.209	8.90903	7.20314e-05	0	-3.91086	1	1
Solyc02g072070	SL3.0ch02	41914886	41916886	-	290	414	270	295	41.193	47.788	6.59443	0.0362354	7.12695	-2.11149	0.00329073	0.243056
Solyc02g072160	SL3.0ch02	42038192	42040192	+	705	677	636	493	51.013	56.333	5.32001	0.0172377	-0.867931	4.91114	0.00596887	0.353468
Solyc02g072260	SL3.0ch02	42125168	42127168	+	106	290	183	278	26.768	39.696	12.9286	0.000285276	-0.872187	3.33512	0.0526424	1
Solyc02g072280	SL3.0ch02	42137986	42139986	-	6	302	47	288	1.948	14.03	12.0818	5.55481e-08	0	-3.91086	1	1
Solyc02g072290	SL3.0ch02	42137751	42139751	+	4	280	47	258	1.408	15.41	14.0014	2.19111e-09	1.80548	-3.79841	1	1
Solyc02g072380	SL3.0ch02	42180071	42182071	-	169	106	72	7	61.455	91.139	29.6847	9.11065e-07	0	-3.91086	1	1
Solyc02g072390	SL3.0ch02	42180706	42182706	-	168	94	72	7	64.122	91.139	27.0171	7.39434e-06	0	-3.91086	1	1
Solyc02g072397	SL3.0ch02	42193781	42195781	-	748	632	808	527	54.203	60.524	6.32145	0.00289681	0.577604	1.18056	0.23468	1
Solyc02g072410	SL3.0ch02	42192396	42194396	-	131	547	162	493	19.322	24.733	5.41129	0.0327078	-3.05854	-3.69481	0.420667	1
Solyc02g072443	SL3.0ch02	42207813	42209813	-	617	624	641	408	49.718	61.106	11.3878	4.54522e-07	4.73707	-3.28582	0.104394	1
Solyc02g072480	SL3.0ch02	42234362	42236362	+	10	21	49	19	32.258	72.059	39.8008	0.00113521	1.4591	-2.86959	0.763024	1
Solyc02g072500	SL3.0ch02	42255320	42257320	-	533	749	534	593	41.576	47.382	5.80677	0.0107786	-1.18946	-0.52319	0.151295	1
Solyc02g072530	SL3.0ch02	42285310	42287310	+	524	816	432	492	39.104	46.753	7.64877	0.00113384	0.0523965	4.34722	0.886312	1
Solyc02g072535	SL3.0ch02	42297335	42299335	-	6	312	30	335	1.887	8.219	6.33239	0.000776229	0	-3.83318	1	1
Solyc02g072550	SL3.0ch02	42301261	42303261	-	7	566	14	377	1.222	3.581	2.35892	0.0398636	2.43654	-3.19976	0.354134	1
Solyc02g072560	SL3.0ch02	42301782	42303782	-	7	538	12	291	1.284	3.96	2.67599	0.029237	-6.17375	-3.00602	0.00425472	0.286597
Solyc02g073572	SL3.0ch02	42321513	42323513	+	517	566	287	203	47.738	58.571	10.8337	0.000297156	2.53125	-2.78092	0.27062	1
Solyc02g073574	SL3.0ch02	42323920	42325920	+	104	14	185	8	88.136	95.855	7.71933	0.0248496	-0.6657	2.11322	0.171153	1
Solyc02g075630	SL3.0ch02	42349923	42351923	-	3694	690	2535	386	84.261	86.785	2.5244	0.00759591	0.00312227	5.68674	0.992673	1
Solyc02g075620	SL3.0ch02	42343487	42345487	+	2586	2509	1892	1406	50.756	57.368	6.61246	3.54393e-08	0	-3.91086	1	1
Solyc02g075625	SL3.0ch02	42356056	42358056	-	339	1104	421	1134	23.493	27.074	3.58123	0.0451149	0	-3.91086	1	1
Solyc02g076770	SL3.0ch02	42439301	42441301	-	229	1031	290	862	18.175	25.174	6.99901	0.000143271	0	-3.54465	1	1
Solyc02g076790	SL3.0ch02	42475190	42477190	-	603	549	466	254	52.344	64.722	12.3785	1.27099e-06	0.0962349	5.00199	0.728658	1
Solyc02g076840	SL3.0ch02	42524949	42526949	+	997	2558	1047	2080	28.045	33.483	5.43756	1.05267e-05	-0.0998732	5.00309	0.741437	1
Solyc02g076870	SL3.0ch02	42552306	42554306	+	325	19	378	6	94.477	98.438	3.96076	0.00934689	-0.0458172	5.91446	0.884983	1
Solyc02g076910	SL3.0ch02	42584146	42586146	+	114	965	152	784	10.565	16.239	5.67398	0.000774467	0	-2.60387	1	1
Solyc02g077010	SL3.0ch02	42653858	42655858	+	949	1200	944	836	44.16	53.034	8.87363	3.03689e-07	0	-3.91086	1	1
Solyc02g077060	SL3.0ch02	42688054	42690054	+	626	1171	585	784	34.836	42.732	7.89608	3.6926e-05	0.479909	2.85266	0.547707	1
Solyc02g077225	SL3.0ch02	42788774	42790774	+	538	783	526	513	40.727	50.626	9.89888	1.04565e-05	2.8965	-2.41717	0.23788	1
Solyc02g077370	SL3.0ch02	42891365	42893365	-	1564	841	1510	691	65.031	68.605	3.57399	0.0212651	0.692739	5.0607	0.535529	1
Solyc02g077380	SL3.0ch02	42897268	42899268	-	972	676	860	465	58.981	64.906	5.92508	0.00289403	0	-3.91086	1	1
Solyc02g077390	SL3.0ch02	42905770	42907770	-	89	211	127	155	29.667	45.035	15.3688	0.000592525	3.2186	-3.79652	0.528142	1
Solyc02g077430	SL3.0ch02	42943255	42945255	-	584	718	574	588	44.854	49.398	4.54352	0.0454032	-0.433842	-2.09356	0.774681	1
Solyc02g077540	SL3.0ch02	43000529	43002529	+	208	128	238	55	61.905	81.229	19.3239	8.73387e-07	-1.9293	-2.50229	1	1
Solyc02g077550	SL3.0ch02	43002023	43004023	+	139	72	137	19	65.877	87.821	21.9437	8.78407e-06	-0.424702	-2.10344	0.873477	1
Solyc02g077580	SL3.0ch02	43039398	43041398	+	461	439	570	405	51.222	58.462	7.23932	0.00503625	0.146155	-0.5707	0.918511	1
Solyc02g077600	SL3.0ch02	43051190	43053190	+	1669	498	1498	340	77.019	81.502	4.48271	0.00169282	0.587815	0.362498	0.501132	1
Solyc02g077610	SL3.0ch02	43068010	43070010	-	1180	519	1003	366	69.453	73.265	3.81254	0.0398743	0.917485	4.6515	0.0946223	1
Solyc02g077615	SL3.0ch02	43068264	43070264	+	1000	548	904	401	64.599	69.272	4.67255	0.0181489	1.4717	-1.28803	0.248074	1
Solyc02g077640	SL3.0ch02	43103522	43105522	+	253	824	331	829	23.491	28.534	5.0433	0.0154193	0	-3.91086	1	1
Solyc02g077680	SL3.0ch02	43133012	43135012	+	1198	1005	1342	938	54.38	58.86	4.47926	0.00666142	-0.165765	5.36638	0.552006	1
Solyc02g077690	SL3.0ch02	43145958	43147958	+	33	24	57	14	57.895	80.282	22.387	0.0152004	-0.318323	3.26637	0.399496	1
Solyc02g077730	SL3.0ch02	43173704	43175704	+	574	675	599	486	45.957	55.207	9.25061	4.80464e-05	0.0109851	4.12539	0.979761	1
Solyc02g077750	SL3.0ch02	43181179	43183179	+	121	790	104	436	13.282	19.259	5.97715	0.00688698	0.665446	6.82784	0.0663272	1
Solyc02g077780	SL3.0ch02	43202116	43204116	-	1435	704	1315	534	67.087	71.12	4.0321	0.0137043	0.46913	5.00472	0.120935	1
Solyc02g077810	SL3.0ch02	43228677	43230677	+	1080	654	1000	476	62.284	67.751	5.46694	0.00362369	-4.12187	-3.69227	0.173263	1
Solyc02g077850	SL3.0ch02	43268579	43270579	-	733	2277	602	1545	24.352	28.039	3.68696	0.00759555	0.0676955	4.10469	0.853037	1
Solyc02g077930	SL3.0ch02	43320955	43322955	-	170	720	160	398	19.101	28.674	9.57271	0.000133412	-0.277414	3.02589	0.666053	1
Solyc02g077940	SL3.0ch02	43319245	43321245	+	428	676	360	423	38.768	45.977	7.2089	0.00553204	-0.19343	3.29981	0.723875	1
Solyc02g078190	SL3.0ch02	43523102	43525102	-	1402	464	1597	435	75.134	78.593	3.45854	0.0221334	0	-3.91086	1	1
Solyc02g078200	SL3.0ch02	43522367	43524367	+	1793	619	1997	582	74.337	77.433	3.09646	0.0220745	-0.0841192	5.25506	0.759035	1
Solyc02g078220	SL3.0ch02	43541928	43543928	+	33	186	61	169	15.068	26.522	11.4532	0.00881356	0	-3.91086	1	1
Solyc02g078285	SL3.0ch02	43603899	43605899	-	1069	374	1045	280	74.082	78.868	4.78615	0.0078287	-0.0387025	1.74027	0.945688	1
Solyc02g078290	SL3.0ch02	43610571	43612571	-	186	353	261	336	34.508	43.719	9.21024	0.00439929	-0.69717	-2.22768	0.633236	1
Solyc02g078310	SL3.0ch02	43617189	43619189	-	13	271	186	333	4.577	35.838	31.2607	5.36318e-25	0	-3.82789	1	1
Solyc02g078330	SL3.0ch02	43628124	43630124	-	1340	262	1284	194	83.645	86.874	3.22871	0.0253935	-0.163313	2.35033	0.684834	1
Solyc02g078360	SL3.0ch02	43647455	43649455	-	2108	426	1944	317	83.189	85.98	2.79102	0.0177949	0.244308	6.13615	0.354136	1
Solyc02g078430	SL3.0ch02	43676748	43678748	+	793	6488	906	5394	10.891	14.381	3.48959	1.12498e-08	0	-3.74361	1	1
Solyc02g078450	SL3.0ch02	43685774	43687774	+	1	53	10	0	1.852	100	98.1481	1.02178e-09	-0.551275	1.3342	0.520652	1
Solyc02g078470	SL3.0ch02	43702944	43704944	+	2069	768	1919	602	72.929	76.121	3.19144	0.0166812	-0.14779	4.90471	0.603902	1
Solyc02g078510	SL3.0ch02	43738507	43740507	-	4	39	20	41	9.302	32.787	23.4846	0.0116954	-1.54628	-0.784611	0.190438	1
Solyc02g078560	SL3.0ch02	43788870	43790870	+	1605	563	1654	350	74.031	82.535	8.50356	4.41745e-10	-0.0327581	5.41235	0.907853	1
Solyc02g078600	SL3.0ch02	43825338	43827338	-	689	879	645	656	43.941	49.577	5.63592	0.00680958	-1.57691	1.08605	0.0599999	1
Solyc02g078630	SL3.0ch02	43846261	43848261	-	30	87	11	10	25.641	52.381	26.7399	0.0357069	-0.117424	4.32577	0.738807	1
Solyc02g078640	SL3.0ch02	43870698	43872698	-	440	460	450	304	48.889	59.682	10.7928	6.71872e-05	0.0280528	6.22472	0.926856	1
Solyc02g078665	SL3.0ch02	43896141	43898141	-	272	484	428	485	35.979	46.878	10.8996	4.00293e-05	1.31283	-1.72617	0.202716	1
Solyc02g078750	SL3.0ch02	43958095	43960095	+	93	394	84	197	19.097	29.893	10.7967	0.00225765	0.455467	1.62541	0.3916	1
Solyc02g078810	SL3.0ch02	44029327	44031327	+	1113	324	995	222	77.453	81.758	4.3054	0.0153357	-0.175851	2.32049	0.714609	1
Solyc02g078860	SL3.0ch02	44069986	44071986	-	912	473	895	349	65.848	71.945	6.09696	0.00263639	-0.403928	3.68778	0.346549	1
Solyc02g078900	SL3.0ch02	44090997	44092997	-	911	803	867	618	53.151	58.384	5.23331	0.00771681	0.14247	6.31476	0.694153	1
Solyc02g079010	SL3.0ch02	44188748	44190748	+	1276	820	1193	639	60.878	65.12	4.24222	0.0148001	-0.064181	4.89714	0.87923	1
Solyc02g079030	SL3.0ch02	44215545	44217545	-	1673	521	1630	409	76.253	79.941	3.68773	0.0101099	-0.442093	1.85525	0.479111	1
Solyc02g079310	SL3.0ch02	44487975	44489975	-	320	878	372	741	26.711	33.423	6.712	0.00153757	0	-3.91086	1	1
Solyc02g079370	SL3.0ch02	44514665	44516665	+	353	421	427	337	45.607	55.89	10.2828	0.000244892	0	-3.91086	1	1
Solyc02g079390	SL3.0ch02	44527367	44529367	-	281	942	450	820	22.976	35.433	12.4568	1.2851e-10	-0.328714	0.898118	0.608469	1
Solyc02g079830	SL3.0ch02	44798295	44800295	+	106	227	136	86	31.832	61.261	29.4294	1.19146e-10	-0.225906	3.38612	0.561762	1
Solyc02g079840	SL3.0ch02	44806047	44808047	+	953	1234	977	935	43.576	51.098	7.52265	1.0097e-05	0	-3.83477	1	1
Solyc02g079890	SL3.0ch02	44842062	44844062	-	135	942	169	802	12.535	17.405	4.86992	0.00596706	0	-3.91086	1	1
Solyc02g079920	SL3.0ch02	44869476	44871476	-	22	501	65	425	4.207	13.265	9.05881	1.92652e-06	-0.334386	1.09103	0.666612	1
Solyc02g079960	SL3.0ch02	44886147	44888147	+	150	158	180	94	48.701	65.693	16.9921	0.000180096	0.452492	7.14266	0.228058	1
Solyc02g080010	SL3.0ch02	44919872	44921872	-	50	91	166	40	35.461	80.583	45.1215	4.02106e-16	0.657559	3.88373	0.504776	1
Solyc02g080090	SL3.0ch02	44957837	44959837	-	602	440	640	365	57.774	63.682	5.90808	0.0147623	2.01926	-1.82462	0.317462	1
Solyc02g080130	SL3.0ch02	44992561	44994561	+	1235	711	1251	579	63.464	68.361	4.89714	0.004432	0.532696	7.01579	0.0393296	0.918664
Solyc02g080140	SL3.0ch02	45009601	45011601	-	1040	623	910	387	62.538	70.162	7.62433	7.3463e-05	0.0138484	5.70217	0.965833	1
Solyc02g080220	SL3.0ch02	45050131	45052131	+	541	380	469	249	58.74	65.32	6.57983	0.0149095	-0.762798	-2.40747	0.742875	1
Solyc02g080260	SL3.0ch02	45084220	45086220	+	557	203	596	164	73.289	78.421	5.13158	0.0404497	-0.551053	-1.18083	0.589824	1
Solyc02g080265	SL3.0ch02	45089754	45091754	+	24	93	30	38	20.513	44.118	23.6048	0.00371531	-2.66131	-3.16963	0.563545	1
Solyc02g080270	SL3.0ch02	45102970	45104970	-	1165	14049	1027	9796	7.657	9.489	1.83163	1.45881e-06	-0.101631	6.10919	0.701993	1
Solyc02g080355	SL3.0ch02	45155854	45157854	+	12	102	16	6	10.526	72.727	62.201	4.93424e-08	0.14168	-0.489861	0.855962	1
Solyc02g080360	SL3.0ch02	45157440	45159440	+	0	71	16	26	0	38.095	38.0952	1.43607e-07	-1.68488	-1.42422	0.248158	1
Solyc02g080430	SL3.0ch02	45208537	45210537	-	228	533	322	528	29.961	37.882	7.92177	0.00274079	0.230456	5.43563	0.422244	1
Solyc02g080440	SL3.0ch02	45207201	45209201	+	233	657	328	651	26.18	33.504	7.3238	0.00189061	-0.153688	5.76995	0.619931	1
Solyc02g080540	SL3.0ch02	45300828	45302828	+	264	609	323	538	30.241	37.515	7.27397	0.00396686	-1.0627	6.05685	0.0695692	1
Solyc02g080610	SL3.0ch02	45348244	45350244	-	9	135	27	81	6.25	25	18.75	0.000176099	0	-3.91086	1	1
Solyc02g080635	SL3.0ch02	45371436	45373436	+	375	909	385	627	29.206	38.043	8.83787	5.1364e-05	-0.700097	0.305394	0.257342	1
Solyc02g080830	SL3.0ch02	45504902	45506902	+	831	213	807	137	79.598	85.487	5.88959	0.00196795	0.680672	2.27107	0.61307	1
Solyc02g080920	SL3.0ch02	45573993	45575993	-	778	957	840	765	44.841	52.336	7.49495	8.58153e-05	-0.499955	-2.31712	0.778576	1
Solyc02g080940	SL3.0ch02	45581053	45583053	+	1588	640	1666	515	71.275	76.387	5.11229	0.000491281	-0.0450337	2.63879	0.926468	1
Solyc02g080950	SL3.0ch02	45581053	45583053	+	1588	640	1666	515	71.275	76.387	5.11229	0.000491281	0.295411	1.87659	0.570192	1
Solyc02g081290	SL3.0ch02	45866150	45868150	+	1640	626	1529	439	72.374	77.693	5.31886	0.000295215	0.626722	1.33037	0.426749	1
Solyc02g081400	SL3.0ch02	45944446	45946446	-	1258	1109	1403	993	53.147	58.556	5.40848	0.00069821	0.158944	7.96046	0.562283	1
Solyc02g081410	SL3.0ch02	45943941	45945941	+	1263	1227	1400	884	50.723	61.296	10.5731	4.40846e-12	-0.0336272	5.54352	0.898038	1
Solyc02g081690	SL3.0ch02	46104944	46106944	+	538	363	487	262	59.711	65.02	5.30859	0.0485036	-0.976834	0.690286	0.372062	1
Solyc02g081770	SL3.0ch02	46148114	46150114	-	503	562	468	407	47.23	53.486	6.25567	0.013999	-4.92906	-3.52423	0.18794	1
Solyc02g081830	SL3.0ch02	46182651	46184651	-	422	614	510	542	40.734	48.479	7.7455	0.00142611	0.243562	5.57255	0.519307	1
Solyc02g081850	SL3.0ch02	46192285	46194285	+	26	73	58	0	26.263	100	73.7374	3.0744e-21	1.94067	-3.72076	1	1
Solyc02g081890	SL3.0ch02	46220943	46222943	-	250	37	213	11	87.108	95.089	7.98127	0.00557776	-2.43412	0.0196749	0.0284228	0.794008
Solyc02g081960	SL3.0ch02	46267305	46269305	+	181	227	193	64	44.363	75.097	30.7345	8.85137e-14	0.113976	5.2621	0.698259	1
Solyc02g082020	SL3.0ch02	46311352	46313352	-	1565	480	1559	403	76.528	79.46	2.93162	0.0465816	0.23498	5.13205	0.495265	1
Solyc02g082030	SL3.0ch02	46311001	46313001	+	1568	540	1559	405	74.383	79.379	4.99552	0.000658564	0.0399053	5.22722	0.880953	1
Solyc02g082080	SL3.0ch02	46360439	46362439	-	726	749	686	597	49.22	53.468	4.24809	0.046324	0.084676	5.30745	0.797883	1
Solyc02g082090	SL3.0ch02	46370634	46372634	-	399	660	441	529	37.677	45.464	7.78686	0.00143907	0	-3.87342	1	1
Solyc02g082155	SL3.0ch02	46424397	46426397	-	0	55	20	1	0	95.238	95.2381	5.47376e-16	0.129801	0.0228743	0.867062	1
Solyc02g082210	SL3.0ch02	46461081	46463081	-	329	260	313	40	55.857	88.669	32.8112	5.82534e-26	-0.0962291	3.3097	0.781901	1
Solyc02g082557	SL3.0ch02	46788603	46790603	-	1356	682	1467	498	66.536	74.656	8.12067	1.75834e-07	0.163609	1.89166	0.790717	1
Solyc02g082560	SL3.0ch02	46788603	46790603	-	1356	682	1467	498	66.536	74.656	8.12067	1.75834e-07	0	-3.91086	1	1
Solyc02g082570	SL3.0ch02	46789403	46791403	+	1577	1261	1774	1038	55.567	63.087	7.51947	9.21792e-08	0.0109479	6.1296	0.965985	1
Solyc02g082613	SL3.0ch02	46812773	46814773	+	554	591	556	465	48.384	54.456	6.07214	0.0119065	0.387643	2.13391	0.538078	1
Solyc02g082670	SL3.0ch02	46873288	46875288	-	916	324	929	265	73.871	77.806	3.93473	0.0452556	1.49642	6.29968	0.000674707	0.0796466
Solyc02g082767	SL3.0ch02	46977842	46979842	+	0	10	16	0	0	100	100	1.47122e-06	0.177311	3.90529	0.655454	1
Solyc02g082780	SL3.0ch02	46990325	46992325	-	414	398	473	342	50.985	58.037	7.05159	0.0107513	0	-3.91086	1	1
Solyc02g082840	SL3.0ch02	47048058	47050058	-	2116	379	2160	234	84.81	90.226	5.41594	1.04967e-07	0.289605	5.79249	0.338931	1
Solyc02g082870	SL3.0ch02	47072725	47074725	+	235	800	243	644	22.705	27.396	4.6904	0.0363412	-3.75756	-3.42278	0.241441	1
Solyc02g082910	SL3.0ch02	47101398	47103398	-	501	539	453	223	48.173	67.012	18.8388	3.32667e-13	0.516707	2.99251	0.432146	1
Solyc02g082970	SL3.0ch02	47122046	47124046	+	982	352	988	204	73.613	82.886	9.27271	1.62161e-07	0.0739077	3.63141	0.856827	1
Solyc02g082980	SL3.0ch02	47125682	47127682	+	3	124	36	215	2.362	14.343	11.9804	0.000485597	0	-3.91086	1	1
Solyc02g083020	SL3.0ch02	47145254	47147254	+	699	307	729	190	69.483	79.325	9.84225	6.09515e-06	-2.95628	-1.90199	0.0109849	0.498614
Solyc02g083030	SL3.0ch02	47150323	47152323	+	1564	448	1350	310	77.734	81.325	3.5917	0.0168241	-2.83771	-2.16194	0.0396828	0.919879
Solyc02g083250	SL3.0ch02	47262971	47264971	-	1873	524	1634	331	78.139	83.155	5.01588	0.000158166	-0.535621	6.51757	0.131509	1
Solyc02g083285	SL3.0ch02	47285385	47287385	+	1102	741	1060	559	59.794	65.473	5.6787	0.00203816	-2.53546	-3.58073	0.441707	1
Solyc02g083375	SL3.0ch02	47361950	47363950	+	117	229	119	107	33.815	52.655	18.8398	4.89279e-05	0.458892	5.22283	0.250654	1
Solyc02g083490	SL3.0ch02	47425385	47427385	+	11	102	44	52	9.735	45.833	36.0988	4.83602e-08	-6.61263	-2.33907	0.0134962	0.561317
Solyc02g083540	SL3.0ch02	47458840	47460840	-	882	787	850	597	52.846	58.742	5.89621	0.00298313	-0.65575	3.89559	0.0911319	1
Solyc02g083590	SL3.0ch02	47498324	47500324	-	1013	248	854	143	80.333	85.657	5.3239	0.00282504	0.133216	6.31982	0.617062	1
Solyc02g083630	SL3.0ch02	47521686	47523686	+	840	507	900	398	62.361	69.337	6.97664	0.00062087	-1.19476	1.06138	0.12516	1
Solyc02g083750	SL3.0ch02	47595701	47597701	-	698	960	719	839	42.099	46.149	4.04999	0.0379124	0	-3.91086	1	1
Solyc02g083800	SL3.0ch02	47623488	47625488	-	20	261	28	69	7.117	28.866	21.7485	1.76643e-06	0.398051	4.22066	0.236393	1
Solyc02g083860	SL3.0ch02	47679181	47681181	-	982	567	862	391	63.396	68.795	5.39915	0.0076344	-1.49413	3.32172	0.0251362	0.75148
Solyc02g083910	SL3.0ch02	47722950	47724950	+	1844	294	2087	232	86.249	89.996	3.74686	0.000452966	0	-3.91086	1	1
Solyc02g083920	SL3.0ch02	47724184	47726184	+	1093	279	1407	229	79.665	86.002	6.33772	2.45552e-05	0	-3.91086	1	1
Solyc02g083980	SL3.0ch02	47764093	47766093	+	48	258	155	91	15.686	63.008	47.3219	3.04937e-29	-0.895517	2.53458	0.0343381	0.864932
Solyc02g084020	SL3.0ch02	47799746	47801746	-	2833	393	2579	266	87.818	90.65	2.83253	0.00145296	0.675476	5.078	0.0191146	0.660572
Solyc02g084090	SL3.0ch02	47844921	47846921	-	189	12	364	8	94.03	97.849	3.81961	0.0492282	2.4209	-1.41957	0.0867663	1
Solyc02g084100	SL3.0ch02	47852882	47854882	-	1312	64	1551	45	95.349	97.18	1.83161	0.0218802	1.89484	-3.54477	1	1
Solyc02g084120	SL3.0ch02	47870279	47872279	-	366	27	651	21	93.13	96.875	3.74523	0.0129356	5.30875	-2.00441	0.00791863	0.424002
Solyc02g084200	SL3.0ch02	47933849	47935849	-	1329	492	1433	385	72.982	78.823	5.841	0.000179514	1.1072	0.204881	0.122576	1
Solyc02g084210	SL3.0ch02	47933250	47935250	+	1346	1298	1447	891	50.908	61.891	10.9828	1.53067e-13	1.46992	1.65064	0.129836	1
Solyc02g084230	SL3.0ch02	47949359	47951359	-	154	724	959	758	17.54	55.853	38.3134	3.7218e-80	0.164249	6.2491	0.576399	1
Solyc02g084240	SL3.0ch02	47950693	47952693	+	284	88	1658	242	76.344	87.263	10.9191	1.6166e-06	0.726345	7.41094	0.050434	1
Solyc02g084265	SL3.0ch02	47976079	47978079	+	74	9	109	1	89.157	99.091	9.93428	0.00645079	0	-3.00888	1	1
Solyc02g084300	SL3.0ch02	47996574	47998574	+	202	52	126	10	79.528	92.647	13.1195	0.00224408	-0.357138	-1.2362	0.817275	1
Solyc02g084340	SL3.0ch02	48007325	48009325	+	1212	524	1437	509	69.816	73.844	4.02811	0.0160077	0.195294	5.14239	0.553533	1
Solyc02g084345	SL3.0ch02	48024248	48026248	-	1588	1202	1756	1121	56.918	61.036	4.11824	0.004755	-3.66811	-3.59217	0.455466	1
Solyc02g084360	SL3.0ch02	48030599	48032599	+	597	645	513	366	48.068	58.362	10.2941	1.74747e-05	-0.0419917	8.77246	0.872566	1
Solyc02g084365	SL3.0ch02	48032901	48034901	+	206	153	195	62	57.382	75.875	18.4939	1.3608e-05	0	-3.91086	1	1
Solyc02g084370	SL3.0ch02	48040705	48042705	-	222	209	676	224	51.508	75.111	23.603	7.54231e-16	1.19119	-1.95357	0.260848	1
Solyc02g084390	SL3.0ch02	48067184	48069184	-	259	510	512	554	33.68	48.03	14.3499	9.58523e-09	-0.77508	2.41681	0.403381	1
Solyc02g084400	SL3.0ch02	48076994	48078994	-	444	660	514	615	40.217	45.527	5.30962	0.0235727	-0.639225	2.81927	0.256951	1
Solyc02g084550	SL3.0ch02	48270897	48272897	+	30	123	125	169	19.608	42.517	22.9092	7.85404e-06	0.568527	5.36917	0.0518221	1
Solyc02g084590	SL3.0ch02	48318042	48320042	-	415	325	706	282	56.081	71.457	15.3764	6.50016e-10	0.270312	1.56567	0.665726	1
Solyc02g084600	SL3.0ch02	48330157	48332157	-	72	1015	439	718	6.624	37.943	31.3192	1.71106e-73	0.926417	4.27529	0.071002	1
Solyc02g084610	SL3.0ch02	48335400	48337400	-	5	401	58	369	1.232	13.583	12.3516	1.67902e-11	-0.626801	2.49369	0.320398	1
Solyc02g084630	SL3.0ch02	48354660	48356660	-	0	37	1709	1050	0	61.943	61.9427	1.12629e-14	0.159642	6.30951	0.653959	1
Solyc02g084640	SL3.0ch02	48373296	48375296	+	1010	488	961	371	67.423	72.147	4.72392	0.0152014	-0.57975	3.68108	0.460387	1
Solyc02g084660	SL3.0ch02	48385303	48387303	+	503	117	494	61	81.129	89.009	7.87998	0.000646383	-0.105875	3.92923	0.757326	1
Solyc02g084690	SL3.0ch02	48434546	48436546	-	141	129	303	78	52.222	79.528	27.3053	4.32803e-12	0.222089	7.2203	0.377485	1
Solyc02g084700	SL3.0ch02	48449643	48451643	-	5	456	42	398	1.085	9.545	8.46086	3.95167e-08	-0.22456	6.26301	0.368285	1
Solyc02g084730	SL3.0ch02	48474716	48476716	+	0	148	133	341	0	28.059	28.0591	4.453e-17	0.0552709	0.297664	0.955056	1
Solyc02g084740	SL3.0ch02	48485938	48487938	-	40	411	125	483	8.869	20.559	11.69	1.07039e-06	1.1204	3.86513	0.00551746	0.336199
Solyc02g084770	SL3.0ch02	48511301	48513301	-	5	222	7	46	2.203	13.208	11.0049	0.0058633	0.183358	1.74166	0.700209	1
Solyc02g084780	SL3.0ch02	48515141	48517141	-	597	435	778	432	57.849	64.298	6.44868	0.00538557	0	-3.91086	1	1
Solyc02g084800	SL3.0ch02	48531783	48533783	-	104	329	146	249	24.018	36.962	12.9435	0.000249661	2.53944	-3.80232	0.640817	1
Solyc02g084790	SL3.0ch02	48521153	48523153	-	513	113	932	147	81.949	86.376	4.42739	0.0326997	0	-3.91086	1	1
Solyc02g084810	SL3.0ch02	48545156	48547156	-	289	670	712	732	30.136	49.307	19.1719	2.78e-19	-0.961554	4.60748	0.000993705	0.107057
Solyc02g084820	SL3.0ch02	48546235	48548235	+	599	142	914	149	80.837	85.983	5.14636	0.00997244	0.23056	5.28678	0.401953	1
Solyc02g084840	SL3.0ch02	48559074	48561074	-	259	924	399	872	21.893	31.393	9.49911	9.43591e-07	-0.375049	0.428217	0.818617	1
Solyc02g084850	SL3.0ch02	48564178	48566178	-	447	655	1186	823	40.563	59.034	18.4717	2.69484e-21	-2.49236	2.35956	0.000970734	0.105216
Solyc02g084860	SL3.0ch02	48569256	48571256	-	118	633	167	575	15.712	22.507	6.79436	0.00290732	-1.62033	-1.11671	0.241588	1
Solyc02g084870	SL3.0ch02	48576544	48578544	-	717	972	1972	1106	42.451	64.068	21.6164	1.28112e-44	0.0998258	5.90456	0.754939	1
Solyc02g084880	SL3.0ch02	48580061	48582061	+	154	460	446	548	25.081	44.869	19.7878	1.99523e-14	3.00496	-1.6176	0.0218558	0.697395
Solyc02g084900	SL3.0ch02	48595932	48597932	-	241	543	950	816	30.74	53.794	23.0541	1.06993e-25	0.24708	5.15224	0.535217	1
Solyc02g084930	SL3.0ch02	48613652	48615652	+	449	604	721	547	42.64	56.861	14.2211	1.56547e-10	-1.28176	-0.582726	0.30116	1
Solyc02g084950	SL3.0ch02	48622600	48624600	+	15	303	1018	975	4.717	51.079	46.3618	3.76458e-63	0.133864	2.74396	0.824166	1
Solyc02g084970	SL3.0ch02	48643012	48645012	+	1819	911	2059	745	66.63	73.431	6.80078	3.00166e-07	-1.16643	0.682233	0.135412	1
Solyc02g084980	SL3.0ch02	48651237	48653237	-	32	661	250	692	4.618	26.539	21.9217	5.00622e-33	-0.504837	1.1294	0.641878	1
Solyc02g085010	SL3.0ch02	48681470	48683470	-	519	367	717	293	58.578	70.99	12.4122	1.83073e-07	0.0586607	4.94949	0.932176	1
Solyc02g085020	SL3.0ch02	48687774	48689774	+	253	368	504	298	40.741	62.843	22.1022	3.18702e-15	-0.406698	-2.81511	0.853631	1
Solyc02g085035	SL3.0ch02	48699441	48701441	-	81	371	156	506	17.92	23.565	5.6446	0.0442408	0.142193	1.96306	0.834482	1
Solyc02g085050	SL3.0ch02	48712648	48714648	-	1460	671	1539	503	68.512	75.367	6.85485	5.68993e-06	-0.129369	5.82944	0.644001	1
Solyc02g085140	SL3.0ch02	48758415	48760415	-	1205	281	1567	163	81.09	90.578	9.48786	1.95392e-13	0.493233	5.33492	0.217661	1
Solyc02g085170	SL3.0ch02	48788594	48790594	+	988	674	886	379	59.446	70.04	10.5931	3.54263e-08	-0.676403	0.850763	0.374298	1
Solyc02g085190	SL3.0ch02	48805105	48807105	-	347	499	647	519	41.017	55.489	14.4723	2.33776e-09	2.76597	-3.32136	0.64911	1
Solyc02g085220	SL3.0ch02	48830819	48832819	-	71	143	239	201	33.178	54.318	21.1406	2.5084e-06	-0.643631	1.25115	0.168951	1
Solyc02g085245	SL3.0ch02	48845657	48847657	+	24	104	22	24	18.75	47.826	29.0761	0.00115923	-0.322742	-0.674496	0.766613	1
Solyc02g085260	SL3.0ch02	48862230	48864230	-	513	870	752	815	37.093	47.99	10.8965	2.64353e-08	4.94744	-2.24793	0.0340103	0.862141
[truncated: 4,823 more rows]

## Sheet: PHYA_vs_WT_BK_hypomethylated
Supplementary Table 14. Total differentially methylated promoters (DMPs) in CG context
[truncated: 5,636 more rows]

## Sheet: PHYA_vs_WT_BK_hypermethylated
Supplementary Table 14. Total differentially methylated promoters (DMPs) in CG context
[truncated: 5,779 more rows]

[truncated: 4 more sheets: PHYB1B2_vs_WT_IG_hypomethylated, PHYB1B2_vs_WT_IG_hypermethylate, PHYB1B2_vs_WT_BK_hypomethylated, PHYB1B2_vsWT_BK_hypermethlated]
