# Supplementary material for: Phytochrome-Mediated Light Perception Affects Fruit Development and Ripening Through Epigenetic Mechanisms
Source: Front Plant Sci. 2022 Apr 28;13:870974. doi: 10.3389/fpls.2022.870974 (PMC9096621; doi:10.3389/fpls.2022.870974)
Supplement: Supplementary file 12 [file Data_Sheet_12.XLSX]

## Sheet: PHYA_vs_WT_IG_hypomethylated
Supplementary Table 15. Total differentially methylated promoters (DMPs) in CHG context
ID	chr	from	to	strand	met_WT	unmet_WT	met_PHYA	unmet_PHYA	X.met_WT	X.met_PHYA	X.diff_PHYA.ctrl	FDR_diff_PHYA.WT	logFC_PHYA	logCPM_PHYA	PValue_PHYA	padj_PHYA
Solyc00g005050	SL3.0ch00	575385	577385	-	934	219	849	314	81.006	73.001	-8.00521	4.36055e-05	0.0432539	6.2588	0.870668	1
Solyc00g005283	SL3.0ch00	2354618	2356618	-	765	182	666	236	80.781	73.836	-6.94549	0.00176687	3.15587	-3.22629	0.109235	1
Solyc00g005430	SL3.0ch00	2358571	2360571	-	624	232	377	225	72.897	62.625	-10.2726	0.000233675	4.45167	-3.65101	0.269915	1
Solyc00g005450	SL3.0ch00	2464349	2466349	+	583	226	687	359	72.064	65.679	-6.3855	0.0114544	0	-3.91086	1	1
Solyc00g006500	SL3.0ch00	4371312	4373312	-	20	0	11	9	100	55	-45	0.00482657	0	-3.91086	1	1
Solyc00g006520	SL3.0ch00	4370980	4372980	+	20	0	11	9	100	55	-45	0.00482657	0	-3.91086	1	1
Solyc00g006680	SL3.0ch00	5629656	5631656	+	13652	2749	3891	1034	83.239	79.005	-4.23375	4.29641e-10	0.0840125	-3.31508	1	1
Solyc00g007970	SL3.0ch00	6941525	6943525	-	115	4	232	40	96.639	85.294	-11.3445	0.00322072	0	-3.91086	1	1
Solyc00g008580	SL3.0ch00	7582182	7584182	+	143697	30050	38402	8683	82.705	81.559	-1.14585	1.14227e-07	1.77258	5.85972	0.0067089	0.37969
Solyc00g009090	SL3.0ch00	7841622	7843622	-	248	590	174	668	29.594	20.665	-8.92919	0.000201549	1.94531	-3.59636	0.614062	1
Solyc00g011150	SL3.0ch00	9131088	9133088	-	79007	14824	22228	5090	84.201	81.368	-2.83379	3.34403e-26	1.56956	4.0957	0.00726466	0.402232
Solyc00g011160	SL3.0ch00	9129189	9131189	+	268110	20319	66784	5268	92.955	92.689	-0.266672	0.0334828	1.75312	5.13575	0.00352554	0.253725
Solyc00g012430	SL3.0ch00	9551103	9553103	+	97189	10458	24842	3625	90.285	87.266	-3.01896	1.14874e-45	2.22073	0.150227	0.0387279	0.91239
Solyc00g068970	SL3.0ch00	13555018	13557018	-	3431	358	1423	213	90.552	86.98	-3.57116	0.000631815	1.52842	4.99672	0.0102499	0.483968
Solyc00g068980	SL3.0ch00	13553285	13555285	+	67662	12656	20259	4404	84.243	82.143	-2.09934	2.94093e-13	1.97808	2.42878	0.00689965	0.38864
Solyc00g071180	SL3.0ch00	13651920	13653920	-	811	523	554	452	60.795	55.07	-5.72502	0.0176744	0	-0.604256	1	1
Solyc00g090860	SL3.0ch00	14446495	14448495	-	460	246	411	305	65.156	57.402	-7.75357	0.00951929	0	-3.91086	1	1
Solyc00g094520	SL3.0ch00	14585676	14587676	-	568	24580	287	18290	2.259	1.545	-0.713708	1.00814e-06	1.80124	-2.96074	1	1
Solyc00g094530	SL3.0ch00	14586705	14588705	-	609	26027	324	19134	2.286	1.665	-0.621254	2.30885e-05	3.5425	-2.86231	0.334099	1
Solyc00g099580	SL3.0ch00	14780831	14782831	-	1404	472	1015	520	74.84	66.124	-8.71631	3.95616e-07	0.858325	-3.48102	0.809078	1
Solyc00g110870	SL3.0ch00	15184121	15186121	-	953	290	264	133	76.669	66.499	-10.1706	0.000448373	-0.891235	-0.077562	0.442095	1
Solyc00g121230	SL3.0ch00	15526756	15528756	-	166	389	139	480	29.91	22.456	-7.45434	0.0132077	0	-3.91086	1	1
Solyc00g125980	SL3.0ch00	15682094	15684094	+	447	8417	229	5570	5.043	3.949	-1.09391	0.00701784	0	-3.91086	1	1
Solyc00g125990	SL3.0ch00	15682094	15684094	+	447	8417	229	5570	5.043	3.949	-1.09391	0.00701784	-0.411468	-0.33344	0.679086	1
Solyc00g134620	SL3.0ch00	15963948	15965948	-	779	201	659	259	79.49	71.786	-7.7033	0.000626433	-2.96613	-3.5284	0.344241	1
Solyc00g183050	SL3.0ch00	17411773	17413773	+	213	178	146	179	54.476	44.923	-9.55263	0.0336844	0.47964	-2.04406	0.745094	1
Solyc00g217960	SL3.0ch00	18350138	18352138	+	499	261	248	175	65.658	58.629	-7.02905	0.0410714	-0.410296	4.61513	0.285253	1
Solyc00g277510	SL3.0ch00	19798998	19800998	-	395	36	317	61	91.647	83.862	-7.7849	0.00316564	0.902746	0.867777	0.459186	1
Solyc00g316530	SL3.0ch00	20653674	20655674	+	1680	272	280	84	86.066	76.923	-9.1425	0.000164232	-2.80434	-3.05152	0.257525	1
Solyc00g318130	SL3.0ch00	20685614	20687614	+	824	49	789	74	94.387	91.425	-2.96191	0.0449534	1.90137	-3.87171	1	1
Solyc01g005100	SL3.0ch01	97452	99452	-	194	429	140	451	31.14	23.689	-7.45098	0.0124117	0.168558	4.06151	0.632906	1
Solyc01g005130	SL3.0ch01	122769	124769	+	36	415	7	347	7.982	1.977	-6.00486	0.000631745	-0.106701	4.23302	0.775325	1
Solyc01g005190	SL3.0ch01	149494	151494	+	8	43	0	94	15.686	0	-15.6863	0.000858112	-0.154148	-1.30319	0.935446	1
Solyc01g005200	SL3.0ch01	152262	154262	+	36	215	9	141	14.343	6	-8.34263	0.0341209	-2.26615	-3.05079	0.260619	1
Solyc01g005210	SL3.0ch01	163331	165331	+	196	591	125	534	24.905	18.968	-5.93657	0.0215993	-0.396712	6.30086	0.320442	1
Solyc01g005295	SL3.0ch01	211044	213044	-	1094	427	841	450	71.926	65.143	-6.78306	0.000679301	-2.42895	1.99562	0.00572462	0.345292
Solyc01g005380	SL3.0ch01	259020	261020	+	70	578	30	443	10.802	6.342	-4.45997	0.0284836	1.03402	-1.76595	0.377987	1
Solyc01g005385	SL3.0ch01	259135	261135	+	70	608	31	456	10.324	6.366	-3.95898	0.0465801	0	-3.79823	1	1
Solyc01g005510	SL3.0ch01	348880	350880	-	341	166	237	255	67.258	48.171	-19.0877	1.76825e-08	4.4019	-3.29228	0.199436	1
Solyc01g005630	SL3.0ch01	442810	444810	+	1116	376	943	417	74.799	69.338	-5.46069	0.00495098	0	-3.91086	1	1
Solyc01g005770	SL3.0ch01	502223	504223	-	12	33	2	51	26.667	3.774	-22.8931	0.00896075	0	-3.65929	1	1
Solyc01g005810	SL3.0ch01	528366	530366	+	321	263	256	286	54.966	47.232	-7.73328	0.0277086	0.508555	6.59137	0.0726017	1
Solyc01g005910	SL3.0ch01	588593	590593	+	641	280	529	324	69.598	62.016	-7.58185	0.00332183	-0.0735646	4.94696	0.793025	1
Solyc01g005920	SL3.0ch01	602186	604186	-	642	650	489	657	49.69	42.67	-7.02025	0.00244808	-1.3534	1.46283	0.0220738	0.701811
Solyc01g005940	SL3.0ch01	612494	614494	+	1271	479	846	571	72.629	59.704	-12.925	6.24645e-13	3.59439	-3.5614	0.3824	1
Solyc01g005960	SL3.0ch01	623152	625152	+	269	1046	120	647	20.456	15.645	-4.8109	0.0208949	-0.00414021	5.87646	0.988405	1
Solyc01g005970	SL3.0ch01	640038	642038	+	295	812	211	841	26.649	20.057	-6.59157	0.00150967	0.179813	2.72944	0.654338	1
Solyc01g006090	SL3.0ch01	751736	753736	+	718	168	576	222	81.038	72.18	-8.85792	0.000129158	1.00439	2.58471	0.0744231	1
Solyc01g006170	SL3.0ch01	811277	813277	-	535	130	404	214	80.451	65.372	-15.079	2.00008e-08	0.727463	4.24442	0.0673227	1
Solyc01g006290	SL3.0ch01	882366	884366	+	722	505	455	439	58.843	50.895	-7.94785	0.0014241	0	2.82469	1	1
Solyc01g006370	SL3.0ch01	1005282	1007282	-	409	236	371	287	63.411	56.383	-7.02787	0.0290955	-0.317774	6.81609	0.323418	1
Solyc01g006480	SL3.0ch01	1071745	1073745	+	1198	451	928	478	72.65	66.003	-6.64725	0.000464732	0.103792	3.8159	0.747753	1
Solyc01g006530	SL3.0ch01	1102222	1104222	+	1137	471	911	564	70.709	61.763	-8.94624	1.87655e-06	0	-3.87049	1	1
Solyc01g006620	SL3.0ch01	1219101	1221101	-	355	463	268	445	43.399	37.588	-5.81088	0.0498434	4.14377	-3.69072	0.332963	1
Solyc01g006820	SL3.0ch01	1391134	1393134	-	24	178	14	268	11.881	4.965	-6.91665	0.0181621	0.293821	0.0936743	0.725738	1
Solyc01g006860	SL3.0ch01	1427968	1429968	-	1011	576	806	568	63.705	58.661	-5.04426	0.0157199	-0.45528	1.38606	0.514541	1
Solyc01g006900	SL3.0ch01	1477626	1479626	-	588	321	533	372	64.686	58.895	-5.79144	0.031234	0.335439	8.42115	0.296162	1
Solyc01g006930	SL3.0ch01	1501974	1503974	+	813	462	591	473	63.765	55.545	-8.21959	0.000348392	-1.19902	4.44443	0.00517614	0.320661
Solyc01g006980	SL3.0ch01	1549134	1551134	+	124	332	76	349	27.193	17.882	-9.31063	0.00398918	-0.394276	5.25067	0.162192	1
Solyc01g007100	SL3.0ch01	1657440	1659440	-	841	451	663	484	65.093	57.803	-7.28992	0.00122485	-1.37237	3.82582	0.000499077	0.0628556
Solyc01g007180	SL3.0ch01	1744700	1746700	-	1007	423	952	486	70.42	66.203	-4.21652	0.0393155	0.313107	2.91454	0.444961	1
Solyc01g007240	SL3.0ch01	1805066	1807066	+	985	88	768	108	91.799	87.671	-4.12746	0.010381	3.15637	-3.05714	0.112103	1
Solyc01g007890	SL3.0ch01	1998989	2000989	-	138	1163	57	901	10.607	5.95	-4.65733	0.000582048	-0.0385082	0.617487	0.970394	1
Solyc01g007990	SL3.0ch01	2102280	2104280	+	634	345	499	389	64.76	56.194	-8.56627	0.000935104	0.432721	3.79441	0.344574	1
Solyc01g008060	SL3.0ch01	2136396	2138396	+	1124	239	868	295	82.465	74.635	-7.83058	1.80872e-05	0.0153735	5.47341	0.954545	1
Solyc01g008320	SL3.0ch01	2359806	2361806	+	1835	169	1755	283	91.567	86.114	-5.45303	4.6219e-07	0.532498	6.13021	0.0670438	1
Solyc01g008430	SL3.0ch01	2451862	2453862	-	604	272	915	526	68.95	63.498	-5.4522	0.022124	0	-3.91086	1	1
Solyc01g008440	SL3.0ch01	2455095	2457095	+	404	329	217	307	55.116	41.412	-13.7037	1.78126e-05	-0.162688	4.55181	0.670353	1
Solyc01g008497	SL3.0ch01	2548843	2550843	-	1127	386	797	501	74.488	61.402	-13.0856	3.17637e-12	3.64896	-0.116818	0.0546759	1
Solyc01g008600	SL3.0ch01	2615089	2617089	+	1317	338	1002	321	79.577	75.737	-3.84008	0.0330334	-0.225763	4.09473	0.502089	1
Solyc01g008770	SL3.0ch01	2728760	2730760	+	1167	369	867	344	75.977	71.594	-4.38284	0.0264059	-0.052643	5.22956	0.85554	1
Solyc01g008800	SL3.0ch01	2774775	2776775	-	1011	562	686	572	64.272	54.531	-9.74109	2.05338e-06	0.54084	-1.01086	0.597212	1
Solyc01g008810	SL3.0ch01	2774775	2776775	-	1011	562	686	572	64.272	54.531	-9.74109	2.05338e-06	0.933805	1.43634	0.0829546	1
Solyc01g008820	SL3.0ch01	2776260	2778260	+	808	445	495	487	64.485	50.407	-14.0779	5.52396e-10	0.382632	5.7268	0.177676	1
Solyc01g008890	SL3.0ch01	2852040	2854040	-	1318	256	1076	293	83.736	78.598	-5.13819	0.00177569	0.180062	3.79302	0.578853	1
Solyc01g008900	SL3.0ch01	2853138	2855138	+	839	169	665	204	83.234	76.525	-6.70939	0.00155108	0.551987	2.41205	0.188889	1
Solyc01g008940	SL3.0ch01	2890927	2892927	+	144	122	76	105	54.135	41.989	-12.1464	0.0321197	-5.26675	-2.67371	0.000290427	0.0422275
Solyc01g008980	SL3.0ch01	2927000	2929000	+	309	376	284	502	45.109	36.132	-8.97717	0.00239217	0.0696581	0.849862	0.914401	1
Solyc01g009020	SL3.0ch01	2958478	2960478	-	539	336	591	563	61.6	51.213	-10.3868	2.8252e-05	-0.127414	7.18973	0.681322	1
Solyc01g009190	SL3.0ch01	3168921	3170921	+	423	180	495	314	70.149	61.187	-8.9626	0.00217078	-3.92221	-3.34744	0.411974	1
Solyc01g009270	SL3.0ch01	3227063	3229063	-	381	281	384	376	57.553	50.526	-7.02655	0.0247341	0.63186	-2.76527	1	1
Solyc01g009480	SL3.0ch01	3640739	3642739	-	557	585	525	671	48.774	43.896	-4.87776	0.0469001	0	-3.86959	1	1
Solyc01g009550	SL3.0ch01	3741980	3743980	+	1845	513	1652	567	78.244	74.448	-3.79633	0.00942905	0	-3.91086	1	1
Solyc01g009580	SL3.0ch01	3760291	3762291	+	431	428	369	502	50.175	42.365	-7.80952	0.00483122	-4.61554	-3.58185	0.236473	1
Solyc01g009600	SL3.0ch01	3771753	3773753	-	423	251	305	252	62.76	54.758	-8.00201	0.015839	0	-3.91086	1	1
Solyc01g009670	SL3.0ch01	3847938	3849938	-	558	617	390	589	47.489	39.837	-7.65279	0.0019312	-0.264234	0.217826	0.746876	1
Solyc01g009890	SL3.0ch01	4356474	4358474	+	773	222	744	294	77.688	71.676	-6.01214	0.00688986	0	-3.91086	1	1
Solyc01g010190	SL3.0ch01	4918301	4920301	+	1013	200	837	235	83.512	78.078	-5.4336	0.00445301	0.368951	5.22372	0.303624	1
Solyc01g010220	SL3.0ch01	4937360	4939360	+	185	395	119	422	31.897	21.996	-9.90025	0.00110696	-0.0403201	4.32899	0.917636	1
Solyc01g010360	SL3.0ch01	5114498	5116498	-	585	234	133	195	71.429	40.549	-30.8798	2.47391e-20	-1.52767	-0.330225	0.154686	1
Solyc01g010525	SL3.0ch01	5482425	5484425	+	58	361	25	500	13.842	4.762	-9.08058	1.24968e-05	-1.47047	-3.38419	0.486991	1
Solyc01g010650	SL3.0ch01	5604422	5606422	-	499	286	424	374	63.567	53.133	-10.434	0.00019208	0.478325	5.48461	0.0900089	1
Solyc01g011300	SL3.0ch01	8409393	8411393	-	1886	379	1762	441	83.267	79.982	-3.28527	0.0149013	0	-3.91086	1	1
Solyc01g011480	SL3.0ch01	9329458	9331458	-	587	313	419	365	65.222	53.444	-11.7783	9.80342e-06	0	-3.91086	1	1
Solyc01g014070	SL3.0ch01	11089333	11091333	-	1335	420	830	373	76.068	68.994	-7.07419	0.000160815	0	-3.91086	1	1
Solyc01g014370	SL3.0ch01	12495362	12497362	-	465	97	380	114	82.74	76.923	-5.81714	0.0477784	0	-3.91086	1	1
Solyc01g014566	SL3.0ch01	14364901	14366901	+	299	59	317	108	83.52	74.588	-8.93132	0.00971754	0	-3.91086	1	1
Solyc01g015085	SL3.0ch01	16741535	16743535	+	1456	321	1294	399	81.936	76.432	-5.50348	0.000412873	0	-3.91086	1	1
Solyc01g015230	SL3.0ch01	17940655	17942655	-	813	122	823	188	86.952	81.405	-5.54732	0.00405694	0	-3.91086	1	1
Solyc01g016550	SL3.0ch01	20424155	20426155	-	1039	148	547	297	87.532	64.81	-22.7212	6.58903e-32	1.95247	-3.74789	1	1
Solyc01g016760	SL3.0ch01	21943485	21945485	+	484	155	448	194	75.743	69.782	-5.96142	0.0414065	0	-3.91086	1	1
Solyc01g016790	SL3.0ch01	22129741	22131741	+	371	113	252	114	76.653	68.852	-7.80043	0.0317349	0	-3.91086	1	1
Solyc01g016880	SL3.0ch01	22610247	22612247	+	453	164	333	194	73.42	63.188	-10.2319	0.00108146	0	-3.91086	1	1
Solyc01g016890	SL3.0ch01	22665080	22667080	+	230	522	72	553	30.585	11.52	-19.0651	1.60512e-16	0	-3.91086	1	1
Solyc01g017640	SL3.0ch01	24559070	24561070	+	793	224	800	287	77.974	73.597	-4.37738	0.045545	0	-3.91086	1	1
Solyc01g017710	SL3.0ch01	24811699	24813699	+	162	154	181	304	51.266	37.32	-13.9462	0.000608633	1.55796	-2.4243	0.447025	1
Solyc01g017740	SL3.0ch01	25042091	25044091	-	155	42	99	50	78.68	66.443	-12.2373	0.034845	0.227636	-3.03606	1	1
Solyc01g020150	SL3.0ch01	27720863	27722863	+	150	178	4	61	45.732	6.154	-39.5779	1.61e-09	0.698894	-1.53464	0.39672	1
Solyc01g020360	SL3.0ch01	29342396	29344396	-	666	139	259	146	82.733	63.951	-18.7823	2.96527e-11	0	-3.91086	1	1
Solyc01g020378	SL3.0ch01	29896586	29898586	-	319	586	142	494	35.249	22.327	-12.9216	5.1053e-07	-2.56979	-1.23714	0.0902319	1
Solyc01g020400	SL3.0ch01	29896467	29898467	+	254	617	142	534	29.162	21.006	-8.15597	0.001349	0	-3.91086	1	1
Solyc01g022750	SL3.0ch01	32846171	32848171	-	1529	132	1517	191	92.053	88.817	-3.23565	0.00585242	-0.165158	5.92716	0.652785	1
Solyc01g028935	SL3.0ch01	39811652	39813652	+	19	456	6	491	4	1.207	-2.79276	0.0212873	-2.02753	-2.19065	0.221636	1
Solyc01g044277	SL3.0ch01	43059802	43061802	-	860	203	660	204	80.903	76.389	-4.51422	0.0435911	0	-3.91086	1	1
Solyc01g044305	SL3.0ch01	43150897	43152897	-	213	31	135	37	87.295	78.488	-8.80671	0.0496396	0	-3.91086	1	1
Solyc01g049685	SL3.0ch01	45792778	45794778	-	579	389	650	557	59.814	53.853	-5.96152	0.0163748	0	-3.82789	1	1
Solyc01g049840	SL3.0ch01	46574317	46576317	-	434	531	224	463	44.974	32.606	-12.3686	4.49911e-06	-1.8313	-2.13752	0.418097	1
Solyc01g049845	SL3.0ch01	46595576	46597576	+	877	95	846	133	90.226	86.415	-3.81163	0.0250711	0	-3.91086	1	1
Solyc01g049960	SL3.0ch01	47627525	47629525	-	2347	146	1782	169	94.144	91.338	-2.80583	0.00156801	-0.114768	5.45723	0.663992	1
Solyc01g056650	SL3.0ch01	55344776	55346776	+	620	58	717	107	91.445	87.015	-4.43086	0.0184729	0	-3.91086	1	1
Solyc01g056750	SL3.0ch01	56454340	56456340	+	970	129	1040	214	88.262	82.935	-5.32745	0.00137798	1.37005	-2.78697	0.43387	1
Solyc01g056850	SL3.0ch01	56987295	56989295	-	183	1058	106	928	14.746	10.251	-4.49472	0.00581307	-0.997032	4.8358	0.185268	1
Solyc01g057310	SL3.0ch01	60470836	60472836	-	421	197	276	205	68.123	57.38	-10.7425	0.00154404	-0.436381	1.37615	0.546481	1
Solyc01g057330	SL3.0ch01	60490094	60492094	+	99	574	57	639	14.71	8.19	-6.5206	0.000899482	-0.573199	-3.21283	1	1
Solyc01g057460	SL3.0ch01	60979001	60981001	+	942	358	771	383	72.462	66.811	-5.65045	0.00838597	0.666054	4.86431	0.0481493	0.994919
Solyc01g057480	SL3.0ch01	61024567	61026567	+	210	387	81	313	35.176	20.558	-14.6175	5.87962e-06	-1.80697	-3.37859	1	1
Solyc01g057490	SL3.0ch01	61051966	61053966	+	129	235	126	339	35.44	27.097	-8.34279	0.0271948	0.732103	1.36957	0.175101	1
Solyc01g057610	SL3.0ch01	62839878	62841878	+	1442	224	1076	230	86.555	82.389	-4.16565	0.00736027	0	-3.91086	1	1
Solyc01g057830	SL3.0ch01	64028386	64030386	+	611	60	491	83	91.058	85.54	-5.51805	0.0085495	-0.654175	6.48182	0.0817338	1
Solyc01g057920	SL3.0ch01	64503173	64505173	-	470	768	314	832	37.964	27.4	-10.5648	5.96204e-07	0	-3.91086	1	1
Solyc01g058040	SL3.0ch01	64965082	64967082	-	140	872	24	835	13.834	2.794	-11.04	4.429e-17	0	-3.91086	1	1
Solyc01g058280	SL3.0ch01	65887053	65889053	-	676	265	536	310	71.838	63.357	-8.4815	0.000772239	0.171072	4.99427	0.557343	1
Solyc01g058360	SL3.0ch01	66327542	66329542	+	3266	412	1348	306	88.798	81.499	-7.29886	4.12159e-11	0	-3.34951	1	1
Solyc01g058500	SL3.0ch01	66782775	66784775	-	139944	34822	37712	9881	80.075	79.239	-0.836528	0.000350707	1.56908	6.20693	0.00940956	0.463583
Solyc01g058700	SL3.0ch01	67656464	67658464	-	886	414	573	498	68.154	53.501	-14.6524	9.66598e-12	0	-3.91086	1	1
Solyc01g059920	SL3.0ch01	69263635	69265635	+	929	93	794	115	90.9	87.349	-3.55146	0.0322126	-0.299405	2.5463	0.507313	1
Solyc01g060070	SL3.0ch01	69464276	69466276	-	1404	332	1336	388	80.876	77.494	-3.38138	0.0375044	-0.813997	3.00696	0.166811	1
Solyc01g060080	SL3.0ch01	69524484	69526484	-	658	55	606	141	92.286	81.124	-11.1616	5.49073e-09	0.275657	5.32462	0.361443	1
Solyc01g060314	SL3.0ch01	70127947	70129947	+	642	169	354	161	79.162	68.738	-10.4237	0.000154468	0	-3.91086	1	1
Solyc01g060350	SL3.0ch01	70259992	70261992	+	788	342	690	377	69.735	64.667	-5.06722	0.0319815	-0.658108	-3.62909	1	1
Solyc01g060380	SL3.0ch01	70808739	70810739	-	1150	161	568	284	87.719	66.667	-21.0526	1.16445e-29	2.62629	-3.75877	0.605764	1
Solyc01g060390	SL3.0ch01	70809201	70811201	-	578	215	113	355	72.888	24.145	-48.7425	7.2746e-63	-3.0415	-3.76582	0.487984	1
Solyc01g060400	SL3.0ch01	70809838	70811838	-	180	284	23	341	38.793	6.319	-32.4744	4.59059e-28	0	-3.91086	1	1
Solyc01g065710	SL3.0ch01	72117917	72119917	-	858	156	707	309	84.615	69.587	-15.0288	2.13003e-14	-0.250696	2.17758	0.590994	1
Solyc01g066080	SL3.0ch01	72876430	72878430	-	728	181	553	199	80.088	73.537	-6.55077	0.00679696	-0.0908119	-3.3648	1	1
Solyc01g066330	SL3.0ch01	73924755	73926755	+	450	100	297	129	81.818	69.718	-12.0999	9.69686e-05	0	-3.91086	1	1
Solyc01g066420	SL3.0ch01	74104293	74106293	-	826	199	693	224	80.585	75.573	-5.01285	0.0230087	0	-3.91086	1	1
Solyc01g066940	SL3.0ch01	75024149	75026149	+	433	386	412	466	52.869	46.925	-5.94452	0.0375788	0.189936	5.00617	0.558593	1
Solyc01g067025	SL3.0ch01	75178396	75180396	-	679	415	474	390	62.066	54.861	-7.2047	0.00542299	-1.08955	-0.838316	0.475185	1
Solyc01g067400	SL3.0ch01	75701486	75703486	-	308	633	226	636	32.731	26.218	-6.51304	0.00943214	-0.14448	5.3089	0.613804	1
Solyc01g067417	SL3.0ch01	75806191	75808191	+	285	512	187	454	35.759	29.173	-6.58593	0.0255478	0	-3.91086	1	1
Solyc01g067890	SL3.0ch01	76683503	76685503	-	440	429	381	491	50.633	43.693	-6.94025	0.0127916	-0.601317	8.11466	0.178337	1
Solyc01g068010	SL3.0ch01	76869045	76871045	+	823	204	840	292	80.136	74.205	-5.93137	0.00485163	0	-3.91086	1	1
Solyc01g068070	SL3.0ch01	76908497	76910497	+	793	327	639	337	70.804	65.471	-5.33226	0.0262187	0.202749	3.96957	0.554979	1
Solyc01g068120	SL3.0ch01	77041874	77043874	+	199	432	156	476	31.537	24.684	-6.8537	0.0205117	-2.43873	-3.62421	0.451487	1
Solyc01g068440	SL3.0ch01	77498169	77500169	+	1378	233	1254	287	85.537	81.376	-4.1612	0.00661432	0	-2.42449	1	1
Solyc01g068460	SL3.0ch01	77514073	77516073	-	593	727	492	808	44.924	37.846	-7.07809	0.00131855	0	-3.91086	1	1
Solyc01g079100	SL3.0ch01	78023182	78025182	+	1563	94	1551	142	94.327	91.613	-2.71458	0.00824457	-0.675858	-2.25037	0.76107	1
Solyc01g079270	SL3.0ch01	78220427	78222427	-	781	321	641	394	70.871	61.932	-8.93878	9.59833e-05	0	-3.91086	1	1
Solyc01g079290	SL3.0ch01	78233616	78235616	-	79	301	55	343	20.789	13.819	-6.97038	0.0279866	1.30213	-0.241144	0.102516	1
Solyc01g079460	SL3.0ch01	78375458	78377458	-	579	483	484	496	54.52	49.388	-5.13202	0.0486806	-1.01596	-3.1107	0.737592	1
Solyc01g079580	SL3.0ch01	78533392	78535392	+	193	374	169	474	34.039	26.283	-7.75575	0.0122892	-0.215361	4.39668	0.720055	1
Solyc01g079650	SL3.0ch01	78631307	78633307	+	94	596	39	669	13.623	5.508	-8.11471	2.54294e-06	0.344092	4.3406	0.301105	1
Solyc01g079800	SL3.0ch01	78793725	78795725	-	1202	352	853	357	77.349	70.496	-6.85291	0.000328741	0.107011	2.73683	0.81051	1
Solyc01g079840	SL3.0ch01	78834612	78836612	-	322	155	341	237	67.505	58.997	-8.5087	0.0150848	0.142972	6.4242	0.568617	1
Solyc01g079880	SL3.0ch01	78887702	78889702	-	379	741	237	667	33.839	26.217	-7.62247	0.00113684	-0.384445	9.58865	0.206437	1
Solyc01g079940	SL3.0ch01	78952701	78954701	-	264	728	188	719	26.613	20.728	-5.88523	0.0101269	-0.382909	1.52521	0.726419	1
Solyc01g080130	SL3.0ch01	79140332	79142332	-	672	535	563	622	55.675	47.511	-8.16468	0.000429918	-0.266662	4.30854	0.44994	1
Solyc01g080210	SL3.0ch01	79283483	79285483	-	243	515	177	514	32.058	25.615	-6.443	0.0217431	-0.141926	4.33187	0.735291	1
Solyc01g080520	SL3.0ch01	79616012	79618012	+	188	195	69	329	49.086	17.337	-31.7495	9.68687e-20	-1.9143	-3.87151	1	1
Solyc01g080550	SL3.0ch01	79656033	79658033	-	687	83	566	123	89.221	82.148	-7.07274	0.00065742	-2.05764	-3.1831	0.402542	1
Solyc01g080680	SL3.0ch01	79778937	79780937	+	267	966	161	833	21.655	16.197	-5.45732	0.00463237	-2.85919	4.51473	0.000340084	0.0473463
Solyc01g080725	SL3.0ch01	79830867	79832867	-	660	388	465	365	62.977	56.024	-6.953	0.00848809	0	-3.91086	1	1
Solyc01g080787	SL3.0ch01	79907762	79909762	+	694	42	600	74	94.293	89.021	-5.27271	0.0020276	0	-3.91086	1	1
Solyc01g081020	SL3.0ch01	80181397	80183397	-	110	164	95	365	40.146	20.652	-19.4938	3.33476e-07	0.614071	-2.11208	0.61134	1
Solyc01g081080	SL3.0ch01	80281965	80283965	-	350	917	247	879	27.624	21.936	-5.68825	0.00571812	0	-3.91086	1	1
Solyc01g081175	SL3.0ch01	80332110	80334110	+	520	501	440	579	50.93	43.18	-7.75087	0.00212005	0.311228	-0.674189	0.753537	1
Solyc01g081360	SL3.0ch01	80441511	80443511	+	994	266	654	250	78.889	72.345	-6.54376	0.00227587	0	-3.91086	1	1
Solyc01g081410	SL3.0ch01	80468854	80470854	-	612	304	628	406	66.812	60.735	-6.07722	0.0165194	-0.642829	1.63649	0.230385	1
Solyc01g081500	SL3.0ch01	80552714	80554714	+	893	154	822	187	85.291	81.467	-3.82451	0.0479833	-0.0463309	6.32091	0.857374	1
Solyc01g081520	SL3.0ch01	80577140	80579140	-	980	243	50	238	80.131	17.361	-62.7697	3.344e-87	-0.0532933	5.94881	0.837807	1
Solyc01g081530	SL3.0ch01	80579704	80581704	-	662	1000	401	908	39.832	30.634	-9.19746	2.56534e-06	1.90136	-3.87171	1	1
Solyc01g081640	SL3.0ch01	80690362	80692362	-	377	1013	269	902	27.122	22.972	-4.15048	0.0420751	-0.335504	-2.20332	0.772834	1
Solyc01g073700	SL3.0ch01	80956511	80958511	-	97	764	45	580	11.266	7.2	-4.06597	0.0256678	0	-3.91086	1	1
Solyc01g073730	SL3.0ch01	80987627	80989627	-	368	506	308	534	42.105	36.58	-5.52569	0.0470699	-0.0422117	3.45594	0.906655	1
Solyc01g073740	SL3.0ch01	80989755	80991755	+	283	809	133	855	25.916	13.462	-12.4542	2.59632e-11	0.0500682	6.98425	0.87772	1
Solyc01g073780	SL3.0ch01	81038206	81040206	-	29	319	9	316	8.333	2.769	-5.5641	0.00795835	0	-3.69406	1	1
Solyc01g073910	SL3.0ch01	81129116	81131116	+	192	889	123	947	17.761	11.495	-6.266	0.000267714	0.962239	1.51095	0.356953	1
Solyc01g086953	SL3.0ch01	81730188	81732188	-	506	770	343	853	39.655	28.679	-10.9762	1.45392e-07	3.77258	-3.69836	0.195502	1
Solyc01g086960	SL3.0ch01	81750914	81752914	-	622	379	449	501	62.138	47.263	-14.8747	1.05034e-09	0.44319	8.87499	0.192154	1
Solyc01g086980	SL3.0ch01	81770134	81772134	+	706	305	595	327	69.832	64.534	-5.29823	0.0340549	0.159373	5.42747	0.558333	1
Solyc01g087000	SL3.0ch01	81805187	81807187	-	21	160	0	94	11.602	0	-11.6022	0.00082864	1.0663	-0.780666	0.289609	1
Solyc01g087060	SL3.0ch01	81874752	81876752	-	753	645	721	746	53.863	49.148	-4.71474	0.0317583	-1.25217	0.116334	0.0617148	1
Solyc01g087130	SL3.0ch01	81928960	81930960	+	563	237	521	298	70.375	63.614	-6.76084	0.0136798	0	-3.91086	1	1
Solyc01g087140	SL3.0ch01	81941394	81943394	+	301	531	306	725	36.178	29.68	-6.49796	0.0110669	-1.91429	-3.87151	1	1
Solyc01g087210	SL3.0ch01	82016312	82018312	-	340	661	321	855	33.966	27.296	-6.67012	0.0032455	-0.0480814	8.22187	0.884608	1
Solyc01g087240	SL3.0ch01	82051369	82053369	+	603	193	602	321	75.754	65.222	-10.5317	1.7523e-05	0.0762395	5.16502	0.802262	1
Solyc01g087260	SL3.0ch01	82083087	82085087	-	746	490	596	482	60.356	55.288	-5.06842	0.0360278	0.253684	8.39692	0.395988	1
Solyc01g087340	SL3.0ch01	82180221	82182221	-	894	442	513	369	66.916	58.163	-8.7529	0.000220521	0.432865	1.30541	0.333889	1
Solyc01g087380	SL3.0ch01	82190435	82192435	-	1026	366	321	369	73.707	46.522	-27.1852	1.45544e-31	0.0363484	3.81304	0.916321	1
Solyc01g087890	SL3.0ch01	82630518	82632518	+	486	434	511	568	52.826	47.359	-5.46742	0.0380543	0.0219257	5.86197	0.941668	1
Solyc01g087910	SL3.0ch01	82663948	82665948	-	859	300	695	338	74.116	67.28	-6.83585	0.00223132	0.314772	4.33116	0.306476	1
Solyc01g088050	SL3.0ch01	82772932	82774932	+	443	499	260	377	47.028	40.816	-6.21127	0.0378988	0.154869	1.34201	0.809172	1
Solyc01g088280	SL3.0ch01	82950766	82952766	-	524	575	384	539	47.68	41.603	-6.07624	0.020387	0	-3.91086	1	1
Solyc01g088560	SL3.0ch01	83213794	83215794	-	1572	418	1027	344	78.995	74.909	-4.08615	0.0171192	0.173281	6.58984	0.601207	1
Solyc01g088730	SL3.0ch01	83373965	83375965	-	220	329	212	504	40.073	29.609	-10.4639	0.000699601	0.150741	5.55801	0.597975	1
Solyc01g089990	SL3.0ch01	83585037	83587037	-	491	393	70	355	55.543	16.471	-39.0724	2.57328e-41	1.13953	-3.26811	0.721711	1
Solyc01g090030	SL3.0ch01	83595510	83597510	+	608	204	524	324	74.877	61.792	-13.0844	1.64299e-07	-1.91467	-3.68615	1	1
Solyc01g090170	SL3.0ch01	83663698	83665698	+	180	704	78	568	20.362	12.074	-8.28769	0.000122505	0.0017236	6.18382	0.99572	1
Solyc01g090210	SL3.0ch01	83727365	83729365	+	169	551	161	809	23.472	16.598	-6.87428	0.00228254	-0.0593364	2.80898	0.937009	1
Solyc01g090670	SL3.0ch01	84188725	84190725	+	429	173	298	232	71.262	56.226	-15.036	1.9036e-06	0.0865775	4.50659	0.824601	1
Solyc01g090840	SL3.0ch01	84416643	84418643	+	244	524	163	547	31.771	22.958	-8.81309	0.000818756	0.369404	1.83736	0.646238	1
Solyc01g090900	SL3.0ch01	84484367	84486367	+	706	458	516	456	60.653	53.086	-7.5665	0.00205916	0.338615	-1.94682	0.871613	1
Solyc01g090980	SL3.0ch01	84551406	84553406	+	354	201	317	263	63.784	54.655	-9.12861	0.00743174	2.84861	-3.4033	0.257926	1
Solyc01g090990	SL3.0ch01	84563336	84565336	-	401	338	338	379	54.263	47.141	-7.12165	0.0213756	-0.0997618	4.38712	0.734932	1
Solyc01g091050	SL3.0ch01	84645695	84647695	-	447	475	370	586	48.482	38.703	-9.77863	0.000154682	0	-3.87283	1	1
Solyc01g091280	SL3.0ch01	84810648	84812648	-	369	721	302	760	33.853	28.437	-5.4163	0.0201517	0.276253	5.5712	0.321547	1
Solyc01g091350	SL3.0ch01	84873541	84875541	-	16	439	4	406	3.516	0.976	-2.54087	0.0334184	0.203038	4.72127	0.504325	1
Solyc01g091360	SL3.0ch01	84872868	84874868	+	16	296	4	420	5.128	0.943	-4.18481	0.00343192	0.477723	0.204808	0.675709	1
Solyc01g091450	SL3.0ch01	84941274	84943274	-	995	350	893	400	73.978	69.064	-4.9135	0.0172055	-0.397698	3.28314	0.252947	1
Solyc01g091455	SL3.0ch01	84941106	84943106	+	993	561	905	610	63.9	59.736	-4.16364	0.0451904	0	-3.91086	1	1
Solyc01g091460	SL3.0ch01	84941232	84943232	+	994	396	894	452	71.511	66.419	-5.09177	0.0137189	-0.169638	6.06177	0.561514	1
Solyc01g091490	SL3.0ch01	84996727	84998727	-	662	560	486	523	54.173	48.167	-6.00698	0.0154022	0.0987184	-2.35514	1	1
Solyc01g091530	SL3.0ch01	85025737	85027737	-	795	309	630	338	72.011	65.083	-6.92822	0.00316487	-0.611605	7.31667	0.262157	1
Solyc01g091650	SL3.0ch01	85124563	85126563	-	516	660	348	644	43.878	35.081	-8.79691	0.000225546	-0.0288018	6.01109	0.910781	1
Solyc01g091655	SL3.0ch01	85126383	85128383	+	654	194	592	252	77.123	70.142	-6.98046	0.00453051	0	-3.91086	1	1
Solyc01g091660	SL3.0ch01	85132216	85134216	-	136	503	93	516	21.283	15.271	-6.01232	0.0196961	4.84458	-3.13719	0.165908	1
Solyc01g091710	SL3.0ch01	85180313	85182313	+	1505	531	1262	588	73.919	68.216	-5.70323	0.000548188	-0.17172	5.05765	0.543264	1
Solyc01g094090	SL3.0ch01	85546030	85548030	+	1207	444	848	487	73.107	63.521	-9.58661	2.79031e-07	0	-3.91086	1	1
Solyc01g094770	SL3.0ch01	86062475	86064475	-	338	363	305	501	48.217	37.841	-10.3756	0.000352908	0.0423585	6.32609	0.874873	1
Solyc01g095330	SL3.0ch01	86508906	86510906	-	278	137	266	254	66.988	51.154	-15.8341	1.03175e-05	0	-3.91086	1	1
Solyc01g095350	SL3.0ch01	86510074	86512074	-	790	136	694	172	85.313	80.139	-5.17461	0.0127215	1.09999	-2.96546	0.628437	1
Solyc01g095360	SL3.0ch01	86509905	86511905	+	790	136	697	245	85.313	73.992	-11.3217	2.25788e-08	-0.8859	-0.444271	0.367225	1
Solyc01g095760	SL3.0ch01	86830783	86832783	+	759	637	581	586	54.37	49.786	-4.58385	0.0489338	0	-3.91086	1	1
Solyc01g095840	SL3.0ch01	86874065	86876065	-	228	683	163	640	25.027	20.299	-4.72856	0.0484761	1.90135	-3.87171	1	1
Solyc01g095930	SL3.0ch01	86940743	86942743	+	40	208	11	198	16.129	5.263	-10.8659	0.00137099	-0.440399	5.62942	0.311138	1
Solyc01g096090	SL3.0ch01	87078039	87080039	-	588	861	376	684	40.58	35.472	-5.10801	0.0270276	-0.2056	7.77241	0.511816	1
Solyc01g096500	SL3.0ch01	87467587	87469587	-	1072	258	760	368	80.602	67.376	-13.2256	2.40123e-12	0.0551401	5.78069	0.852649	1
Solyc01g096690	SL3.0ch01	87593075	87595075	-	279	283	184	293	49.644	38.574	-11.0697	0.00172505	1.78455	-3.73058	1	1
Solyc01g096810	SL3.0ch01	87680703	87682703	-	240	658	189	719	26.726	20.815	-5.91108	0.0111765	0.0558834	7.23539	0.848754	1
Solyc01g097030	SL3.0ch01	87883983	87885983	-	2659	373	1771	330	87.698	84.293	-3.4047	0.00236369	0.201773	4.46501	0.478451	1
Solyc01g097320	SL3.0ch01	88098304	88100304	-	1398	202	952	474	87.375	66.76	-20.6148	2.35922e-40	0.257433	4.59887	0.420414	1
Solyc01g097330	SL3.0ch01	88102591	88104591	+	849	240	487	276	77.961	63.827	-14.1344	8.06676e-10	-0.107658	3.88269	0.765998	1
Solyc01g097350	SL3.0ch01	88123487	88125487	-	1041	453	854	472	69.679	64.404	-5.27449	0.0100408	0.146902	6.56507	0.689822	1
Solyc01g097610	SL3.0ch01	88269754	88271754	+	623	135	574	215	82.19	72.75	-9.43966	6.84211e-05	0.279445	4.64942	0.312594	1
Solyc01g097790	SL3.0ch01	88378123	88380123	-	868	544	645	572	61.473	52.999	-8.47391	9.80053e-05	0.128457	4.74114	0.634935	1
Solyc01g097950	SL3.0ch01	88485563	88487563	+	284	481	172	473	37.124	26.667	-10.4575	0.000198718	-1.05591	1.82786	0.172845	1
Solyc01g098270	SL3.0ch01	88725757	88727757	+	223	440	135	380	33.635	26.214	-7.4214	0.0180884	0	-3.91086	1	1
Solyc01g098280	SL3.0ch01	88731412	88733412	+	467	590	483	770	44.182	38.547	-5.63416	0.0193665	-3.3349	-3.33211	0.267539	1
Solyc01g098450	SL3.0ch01	88843989	88845989	+	570	432	459	471	56.886	49.355	-7.53139	0.00412222	0.164363	3.18526	0.753649	1
Solyc01g098570	SL3.0ch01	88931810	88933810	+	907	794	700	736	53.322	48.747	-4.57506	0.0290707	0.657982	4.87579	0.136407	1
Solyc01g098710	SL3.0ch01	89013175	89015175	-	985	860	705	799	53.388	46.875	-6.51253	0.00104589	0.449306	2.21482	0.47368	1
Solyc01g098830	SL3.0ch01	89107892	89109892	+	456	523	390	557	46.578	41.183	-5.39546	0.0451118	0.106552	4.16353	0.729805	1
Solyc01g098890	SL3.0ch01	89143367	89145367	-	69	311	53	424	18.158	11.111	-7.04678	0.0133949	1.1066	-0.43884	0.354382	1
Solyc01g099090	SL3.0ch01	89288229	89290229	-	214	718	94	702	22.961	11.809	-11.1523	1.89897e-08	-0.304621	6.92324	0.30656	1
Solyc01g099180	SL3.0ch01	89362504	89364504	+	366	515	271	540	41.544	33.416	-8.12816	0.00278668	1.39019	4.24504	0.111954	1
Solyc01g099220	SL3.0ch01	89389681	89391681	+	175	342	111	369	33.849	23.125	-10.7241	0.00104633	0.176377	4.96124	0.576751	1
Solyc01g099360	SL3.0ch01	89520023	89522023	+	679	478	666	569	58.686	53.927	-4.75913	0.0482452	0.467668	4.81001	0.124809	1
Solyc01g099840	SL3.0ch01	89860093	89862093	+	365	923	197	781	28.339	20.143	-8.19536	5.96691e-05	-0.223222	8.30811	0.572659	1
Solyc01g100070	SL3.0ch01	90043529	90045529	-	9	197	0	136	4.369	0	-4.36893	0.0333183	-1.72116	-1.24784	0.39469	1
Solyc07g021735	SL3.0ch01	90068603	90070603	-	481	438	385	455	52.339	45.833	-6.50617	0.0192139	0	-3.79271	1	1
Solyc01g100540	SL3.0ch01	90429786	90431786	-	1668	167	1523	235	90.899	86.633	-4.26665	0.000342286	-0.021	3.29588	0.962119	1
Solyc01g100650	SL3.0ch01	90493588	90495588	+	155	747	82	561	17.184	12.753	-4.43131	0.043088	-0.387626	5.99085	0.179072	1
Solyc01g101035	SL3.0ch01	90775837	90777837	-	548	675	435	781	44.808	35.773	-9.03482	4.51547e-05	1.42205	-3.41566	0.58123	1
Solyc01g102260	SL3.0ch01	90968683	90970683	-	36	554	6	350	6.102	1.685	-4.4163	0.00398613	-0.102986	0.751029	0.911226	1
Solyc01g102270	SL3.0ch01	90968846	90970846	+	36	503	6	298	6.679	1.974	-4.70535	0.00892047	-1.11333	3.3205	0.0138025	0.570738
Solyc01g102265	SL3.0ch01	90969001	90971001	+	34	466	4	220	6.8	1.786	-5.01429	0.0119729	0.0282598	-2.79043	1	1
Solyc01g102705	SL3.0ch01	91316650	91318650	+	59	712	13	426	7.652	2.961	-4.69112	0.00368232	-2.67533	-3.48477	0.300421	1
Solyc02g024065	SL3.0ch01	91323590	91325590	+	29	135	12	191	17.683	5.911	-11.7716	0.00196641	0	-3.91086	1	1
Solyc01g103300	SL3.0ch01	91791520	91793520	+	379	1345	222	1172	21.984	15.925	-6.05836	0.000147169	0.0678206	-0.885001	0.957536	1
Solyc01g103350	SL3.0ch01	91855857	91857857	+	840	745	691	739	52.997	48.322	-4.67517	0.0285026	-0.213501	4.77046	0.479345	1
Solyc01g103370	SL3.0ch01	91866909	91868909	+	604	613	388	557	49.63	41.058	-8.57204	0.000447971	0.0623945	6.32545	0.830203	1
Solyc01g103695	SL3.0ch01	92140266	92142266	-	469	535	385	547	46.713	41.309	-5.40413	0.041583	0.640899	2.65477	0.45021	1
Solyc01g103700	SL3.0ch01	92140266	92142266	-	469	535	385	547	46.713	41.309	-5.40413	0.041583	-0.0626222	3.43906	0.892132	1
Solyc01g103862	SL3.0ch01	92266198	92268198	-	74	285	12	178	20.613	6.316	-14.297	5.06315e-05	1.10345	2.69351	0.0265005	0.771253
Solyc01g104060	SL3.0ch01	92432661	92434661	-	1210	233	1109	283	83.853	79.67	-4.18354	0.0130473	-0.792558	3.4211	0.0395678	0.918664
Solyc01g104170	SL3.0ch01	92531770	92533770	-	92	322	45	292	22.222	13.353	-8.86911	0.0063704	0.190927	8.82337	0.455719	1
Solyc01g104190	SL3.0ch01	92536721	92538721	+	758	771	603	762	49.575	44.176	-5.39906	0.0130385	0	-3.91086	1	1
Solyc01g104230	SL3.0ch01	92572917	92574917	-	531	311	434	377	63.064	53.514	-9.54995	0.00056189	-1.13887	-0.936843	0.309977	1
Solyc01g104432	SL3.0ch01	92724301	92726301	-	451	469	369	489	49.022	43.007	-6.01475	0.0305623	-0.074863	6.13093	0.863323	1
Solyc01g104434	SL3.0ch01	92746083	92748083	-	293	443	239	466	39.81	33.901	-5.90907	0.0498619	0.0138261	3.60407	0.982219	1
Solyc01g104438	SL3.0ch01	92773961	92775961	+	766	257	243	278	74.878	46.641	-28.2367	1.0367e-25	-0.779978	-1.24248	0.410905	1
Solyc01g104444	SL3.0ch01	92812192	92814192	-	936	51	759	80	94.833	90.465	-4.36799	0.00173687	-0.51075	-1.35365	0.624104	1
Solyc01g104530	SL3.0ch01	92884980	92886980	-	871	270	748	316	76.337	70.301	-6.0358	0.00553084	0.382862	5.98219	0.183829	1
Solyc01g104600	SL3.0ch01	92940772	92942772	+	782	733	605	732	51.617	45.251	-6.3666	0.00312304	0.245175	4.64918	0.424917	1
Solyc01g104650	SL3.0ch01	92972817	92974817	+	859	296	798	404	74.372	66.389	-7.98294	0.000154853	1.5371	6.31769	0.00559431	0.339148
Solyc01g104720	SL3.0ch01	93013363	93015363	-	752	1075	552	986	41.16	35.891	-5.2696	0.0065771	0.878399	9.88149	0.0112135	0.504508
Solyc01g104750	SL3.0ch01	93023788	93025788	-	384	550	186	361	41.113	34.004	-7.10983	0.0196885	0.194392	1.15655	0.748985	1
Solyc01g104780	SL3.0ch01	93042867	93044867	-	190	548	126	553	25.745	18.557	-7.18856	0.005324	0.792447	1.03176	0.275549	1
Solyc01g104910	SL3.0ch01	93123953	93125953	-	398	382	356	502	51.026	41.492	-9.5338	0.000722083	0.107325	7.81194	0.76851	1
Solyc01g104915	SL3.0ch01	93123865	93125865	-	398	382	356	502	51.026	41.492	-9.5338	0.000722083	-0.751506	-1.7432	0.607892	1
Solyc01g105230	SL3.0ch01	93357100	93359100	+	130	544	79	507	19.288	13.481	-5.80661	0.0184261	-0.0220551	6.03438	0.94394	1
Solyc01g105260	SL3.0ch01	93388013	93390013	-	41	535	22	652	7.118	3.264	-3.85396	0.00904106	0	-3.91086	1	1
Solyc01g105270	SL3.0ch01	93396258	93398258	-	1331	486	1085	631	73.253	63.228	-10.0242	3.31708e-09	-0.000501242	4.24301	1	1
Solyc01g105350	SL3.0ch01	93440896	93442896	+	297	674	215	671	30.587	24.266	-6.32066	0.00891107	0.37109	1.42311	0.620158	1
Solyc01g105540	SL3.0ch01	93577524	93579524	-	332	559	128	377	37.262	25.347	-11.915	4.00361e-05	-0.362853	4.90396	0.270501	1
Solyc01g105730	SL3.0ch01	93693078	93695078	-	570	564	379	585	50.265	39.315	-10.9492	5.31344e-06	0	-3.91086	1	1
Solyc01g105750	SL3.0ch01	93701532	93703532	-	60	181	10	110	24.896	8.333	-16.5629	0.000649355	0	-3.91086	1	1
Solyc01g105760	SL3.0ch01	93701842	93703842	-	71	181	10	110	28.175	8.333	-19.8413	5.44526e-05	0	-3.91086	1	1
Solyc01g105827	SL3.0ch01	93754093	93756093	+	72	904	14	681	7.377	2.014	-5.36266	4.46694e-06	1.75342	-3.28367	0.452014	1
Solyc01g106100	SL3.0ch01	93979250	93981250	-	929	589	912	693	61.199	56.822	-4.37652	0.0340334	0	-3.91086	1	1
Solyc01g106105	SL3.0ch01	93980410	93982410	+	988	486	999	602	67.028	62.399	-4.62999	0.0211409	3.9055	-1.86086	0.312761	1
Solyc01g106830	SL3.0ch01	94469477	94471477	+	416	755	317	734	35.525	30.162	-5.36344	0.0217938	-0.350529	0.873079	0.773121	1
Solyc01g106860	SL3.0ch01	94479454	94481454	+	1073	98	769	127	91.631	85.826	-5.80519	0.000218565	0.577997	-2.87868	0.770937	1
Solyc01g106980	SL3.0ch01	94577515	94579515	-	397	850	147	799	31.836	15.539	-16.2973	2.54054e-17	-3.92714	-3.66542	0.358036	1
Solyc01g107140	SL3.0ch01	94648709	94650709	-	474	608	433	729	43.808	37.263	-6.54442	0.00624638	0	-3.91086	1	1
Solyc01g107215	SL3.0ch01	94745394	94747394	+	10	258	2	276	3.731	0.719	-3.01192	0.0450051	0.20606	1.17122	0.679385	1
Solyc01g107280	SL3.0ch01	94782185	94784185	-	102	1021	75	1121	9.083	6.271	-2.81191	0.0315875	0.762779	0.225542	0.413007	1
Solyc01g107300	SL3.0ch01	94781597	94783597	+	99	798	74	902	11.037	7.582	-3.45482	0.0282276	-0.0904209	5.79182	0.81297	1
Solyc01g107380	SL3.0ch01	94838385	94840385	-	853	512	682	533	62.491	56.132	-6.35916	0.0045242	-0.131703	6.39369	0.723362	1
Solyc01g107440	SL3.0ch01	94891924	94893924	-	137	365	90	377	27.291	19.272	-8.01889	0.0125397	0	-3.91086	1	1
Solyc01g107550	SL3.0ch01	94950825	94952825	-	1088	532	1034	605	67.16	63.087	-4.07325	0.0378248	0.14297	6.89955	0.582282	1
Solyc01g107920	SL3.0ch01	95200917	95202917	-	152	368	71	286	29.231	19.888	-9.34281	0.00739922	0.233209	1.87832	0.667777	1
Solyc01g107930	SL3.0ch01	95202879	95204879	+	332	495	244	501	40.145	32.752	-7.39342	0.00958422	0.147067	4.38777	0.627972	1
Solyc01g107933	SL3.0ch01	95202903	95204903	+	332	495	244	501	40.145	32.752	-7.39342	0.00958422	0	-3.86962	1	1
Solyc01g107990	SL3.0ch01	95274402	95276402	-	744	719	561	691	50.854	44.808	-6.0461	0.00663595	0.0894179	4.06996	0.816369	1
Solyc01g108160	SL3.0ch01	95416572	95418572	+	583	407	515	499	58.889	50.789	-8.09993	0.00138537	0.115956	5.14543	0.699905	1
Solyc01g108380	SL3.0ch01	95596294	95598294	-	1771	722	1278	642	71.039	66.563	-4.47641	0.00601882	0	-3.91086	1	1
Solyc01g109030	SL3.0ch01	96019694	96021694	+	309	405	198	500	43.277	28.367	-14.9105	8.07533e-08	0	-3.91086	1	1
Solyc01g109150	SL3.0ch01	96116671	96118671	+	712	395	608	417	64.318	59.317	-5.0009	0.0429986	0	-2.53314	1	1
Solyc01g109350	SL3.0ch01	96246196	96248196	-	562	682	430	636	45.177	40.338	-4.83914	0.0473837	0.244975	6.8416	0.34602	1
Solyc01g109370	SL3.0ch01	96258663	96260663	+	640	669	467	654	48.892	41.659	-7.23305	0.00179733	-0.165138	2.02108	0.786822	1
Solyc01g109440	SL3.0ch01	96303301	96305301	+	193	1050	116	867	15.527	11.801	-3.72634	0.0301427	0	-3.65395	1	1
Solyc01g109450	SL3.0ch01	96311932	96313932	-	1215	682	1058	752	64.048	58.453	-5.59546	0.00231579	0.104484	3.28491	0.772851	1
Solyc01g109540	SL3.0ch01	96365630	96367630	+	29	476	11	510	5.743	2.111	-3.63125	0.0108845	-0.118833	7.6487	0.680835	1
Solyc01g109550	SL3.0ch01	96383756	96385756	-	24	849	7	804	2.749	0.863	-1.88601	0.016957	-2.85986	-1.67388	0.0298205	0.807559
Solyc01g109600	SL3.0ch01	96410244	96412244	+	294	922	224	1057	24.178	17.486	-6.69129	0.00026064	-0.278403	5.91631	0.422198	1
Solyc01g109890	SL3.0ch01	96647708	96649708	+	511	379	474	450	57.416	51.299	-6.11703	0.0259865	-0.0472229	6.33175	0.898104	1
Solyc01g109900	SL3.0ch01	96656162	96658162	+	170	235	124	255	41.975	32.718	-9.25763	0.0223596	1.97453	-0.409257	0.16002	1
Solyc01g109930	SL3.0ch01	96674085	96676085	+	58	352	15	247	14.146	5.725	-8.42115	0.00242501	-0.110699	4.46661	0.720523	1
Solyc01g109980	SL3.0ch01	96716610	96718610	-	633	433	619	519	59.381	54.394	-4.98719	0.0469001	-0.153439	5.21466	0.588629	1
Solyc01g110210	SL3.0ch01	96885400	96887400	+	644	441	523	465	59.355	52.935	-6.41962	0.0113558	-1.91747	-3.67524	1	1
Solyc01g110470	SL3.0ch01	97082069	97084069	+	526	406	461	442	56.438	51.052	-5.38572	0.049763	0.327388	3.20728	0.391694	1
Solyc01g110570	SL3.0ch01	97139713	97141713	-	366	425	351	524	46.271	40.114	-6.15626	0.0303737	-0.429982	-3.20909	1	1
Solyc01g110880	SL3.0ch01	97296015	97298015	-	35	389	11	403	8.255	2.657	-5.59771	0.00184859	0.57132	1.10812	0.538227	1
Solyc01g111020	SL3.0ch01	97354556	97356556	-	1707	897	1376	908	65.553	60.245	-5.30781	0.000703959	-0.697476	5.81617	0.0208408	0.682632
Solyc01g111060	SL3.0ch01	97367095	97369095	+	267	254	232	307	51.248	43.043	-8.20493	0.0228671	0	-3.91086	1	1
Solyc01g111230	SL3.0ch01	97464217	97466217	+	534	830	458	885	39.15	34.103	-5.04681	0.0195594	0.0282057	5.87202	0.963973	1
Solyc01g111250	SL3.0ch01	97475780	97477780	+	281	1040	195	919	21.272	17.504	-3.76728	0.0483406	0.779881	6.52697	0.0394047	0.918664
Solyc01g111430	SL3.0ch01	97594119	97596119	-	84	623	31	406	11.881	7.094	-4.78737	0.0238029	-0.198134	0.74134	0.777375	1
Solyc01g111700	SL3.0ch01	97803306	97805306	-	12	441	0	317	2.649	0	-2.64901	0.00729322	1.03051	-1.54587	0.270841	1
Solyc01g111820	SL3.0ch01	97893374	97895374	+	58	608	23	576	8.709	3.84	-4.86898	0.00224319	0	-3.7556	1	1
Solyc01g112100	SL3.0ch01	98117373	98119373	-	405	420	271	463	49.091	36.921	-12.1699	1.34484e-05	0	-3.91086	1	1
Solyc01g112150	SL3.0ch01	98144638	98146638	-	478	322	325	337	59.75	49.094	-10.6563	0.000301866	0.0412396	5.77666	0.875373	1
Solyc01g112180	SL3.0ch01	98157851	98159851	+	29	276	7	349	9.508	1.966	-7.5419	0.000139825	0.0340899	4.65142	0.906472	1
Solyc01g112230	SL3.0ch01	98190390	98192390	-	514	234	554	326	68.717	62.955	-5.76203	0.0392803	-0.470601	1.0446	0.614321	1
Solyc01g112240	SL3.0ch01	98192204	98194204	-	35	98	10	200	26.316	4.762	-21.5539	1.99597e-07	0.0644189	3.75565	0.838753	1
Solyc01g112350	SL3.0ch01	98347141	98349141	+	393	80	318	107	83.087	74.824	-8.26315	0.010115	-0.0880304	6.36022	0.750863	1
Solyc02g044003	SL3.0ch02	193710	195710	+	624	194	555	228	76.284	70.881	-5.40239	0.0367399	0	-3.91086	1	1
Solyc02g050183	SL3.0ch02	4144787	4146787	+	150	962	62	791	13.489	7.268	-6.22074	7.29985e-05	0	-3.76263	1	1
Solyc02g050187	SL3.0ch02	4145219	4147219	+	139	825	58	697	14.419	7.682	-6.73697	9.11519e-05	-1.8288	-2.65209	0.567298	1
Solyc00g008680	SL3.0ch02	5838485	5840485	+	363	15	331	30	96.032	91.69	-4.342	0.0355348	-0.0337137	6.64877	0.898967	1
Solyc02g005517	SL3.0ch02	9556213	9558213	-	754	805	354	507	48.364	41.115	-7.24935	0.00284603	-5.49049	-3.08632	0.015079	0.592039
Solyc02g014140	SL3.0ch02	15646945	15648945	+	582	133	361	117	81.399	75.523	-5.87559	0.0402741	0	-3.91086	1	1
Solyc02g014255	SL3.0ch02	16145301	16147301	+	443	544	372	614	44.883	37.728	-7.15529	0.00527859	0	-3.91086	1	1
Solyc02g014400	SL3.0ch02	16680205	16682205	-	296	225	113	336	56.814	25.167	-31.6468	5.08942e-22	0	-3.91086	1	1
Solyc02g014545	SL3.0ch02	17612567	17614567	+	891	225	799	369	79.839	68.408	-11.4312	8.75984e-09	0	-3.91086	1	1
Solyc02g014740	SL3.0ch02	18503348	18505348	+	568	617	428	613	47.932	41.114	-6.81818	0.0052321	-1.79672	-3.71918	1	1
Solyc02g014770	SL3.0ch02	18837397	18839397	+	739	135	681	221	84.554	75.499	-9.05488	1.78145e-05	-0.0406614	4.09833	0.890918	1
Solyc02g014830	SL3.0ch02	19115380	19117380	-	123	366	70	357	25.153	16.393	-8.75993	0.00463187	-0.772464	-3.56723	1	1
Solyc02g014840	SL3.0ch02	19143831	19145831	+	190	242	54	140	43.981	27.835	-16.1464	0.000731715	0.125616	3.1475	0.813096	1
Solyc02g021060	SL3.0ch02	21913557	21915557	-	815	177	634	206	82.157	75.476	-6.68107	0.00240324	0	-3.91086	1	1
Solyc02g021340	SL3.0ch02	22979082	22981082	+	1095	263	971	300	80.633	76.397	-4.23675	0.0244866	-0.0437973	4.62025	0.882021	1
Solyc02g021400	SL3.0ch02	23093710	23095710	+	650	74	464	83	89.779	84.826	-4.95268	0.0262645	0.093491	7.05349	0.798026	1
Solyc02g021670	SL3.0ch02	23972136	23974136	+	322	161	141	166	66.667	45.928	-20.7383	1.47334e-07	1.23788	-2.64753	0.400167	1
Solyc02g021770	SL3.0ch02	24253114	24255114	-	1562	286	1631	378	84.524	81.185	-3.33914	0.0186021	4.75279	-3.57035	0.079064	1
Solyc02g022900	SL3.0ch02	24867960	24869960	+	400	240	228	199	62.5	53.396	-9.10422	0.0114696	7.62983	-0.924666	1.68104e-06	0.000683268
Solyc02g024010	SL3.0ch02	25271859	25273859	+	1022	380	844	553	72.896	60.415	-12.4807	6.49448e-11	0.0734402	3.05701	0.885595	1
Solyc02g030360	SL3.0ch02	26015699	26017699	+	177	88	121	115	66.792	51.271	-15.5213	0.00235488	-0.422849	-0.507351	0.504252	1
Solyc02g030464	SL3.0ch02	26483064	26485064	-	728	373	572	401	66.122	58.787	-7.33445	0.00281512	5.43867	-3.10554	0.0100239	0.478683
Solyc02g030500	SL3.0ch02	26761225	26763225	+	1353	170	1013	174	88.838	85.341	-3.49662	0.0212535	3.27291	-3.14713	0.154804	1
Solyc02g030510	SL3.0ch02	26761625	26763625	+	835	209	582	199	79.981	74.52	-5.461	0.0188459	-4.12052	-3.56247	0.148689	1
Solyc02g030505	SL3.0ch02	26761658	26763658	+	815	208	553	197	79.668	73.733	-5.93431	0.0115249	0.24708	-2.31629	0.88303	1
Solyc02g032250	SL3.0ch02	28537743	28539743	-	510	702	268	471	42.079	36.265	-5.81398	0.0303388	0	-3.91086	1	1
Solyc02g032290	SL3.0ch02	28584250	28586250	+	3624	307	2085	243	92.19	89.562	-2.62843	0.00204869	0	-3.91086	1	1
Solyc02g032310	SL3.0ch02	28686566	28688566	+	256	14	296	35	94.815	89.426	-5.38883	0.0406102	0	-3.91086	1	1
Solyc02g032410	SL3.0ch02	28930560	28932560	-	1500	801	920	739	65.189	55.455	-9.73395	1.09725e-08	0.460535	-2.6647	0.759509	1
Solyc02g032860	SL3.0ch02	29911879	29913879	+	594	307	513	436	65.927	54.057	-11.8698	2.4714e-06	0.660992	5.10812	0.354949	1
Solyc02g036280	SL3.0ch02	30960192	30962192	+	517	13	333	58	97.547	85.166	-12.3809	6.49448e-11	0.240332	-0.0953474	0.697034	1
Solyc02g036310	SL3.0ch02	30974541	30976541	-	1064	223	868	315	82.673	73.373	-9.3001	3.2628e-07	0.400081	3.08853	0.399215	1
Solyc02g060600	SL3.0ch02	33617910	33619910	-	731	402	548	464	64.519	54.15	-10.3688	1.14269e-05	0	-3.91086	1	1
Solyc02g061660	SL3.0ch02	33709435	33711435	-	108	24	73	64	81.818	53.285	-28.5335	6.27341e-06	0	-3.91086	1	1
Solyc02g094752	SL3.0ch02	33988025	33990025	+	112	82	25	42	57.732	37.313	-20.4185	0.0142961	0	-3.91086	1	1
Solyc02g061920	SL3.0ch02	34021616	34023616	+	1219	486	1062	546	71.496	66.045	-5.45083	0.00313166	0	-3.86883	1	1
Solyc02g061940	SL3.0ch02	34036306	34038306	-	128	270	108	364	32.161	22.881	-9.27945	0.00958422	0.189148	2.42851	0.656529	1
Solyc02g062070	SL3.0ch02	34192800	34194800	+	1546	228	1425	267	87.148	84.22	-2.92783	0.037511	0	-3.91086	1	1
Solyc02g062090	SL3.0ch02	34211268	34213268	+	841	422	630	390	66.587	61.765	-4.82278	0.0421834	1.52009	-1.38358	0.106258	1
Solyc02g062250	SL3.0ch02	34393472	34395472	+	232	193	67	177	54.588	27.459	-27.1292	1.85166e-10	0.0758319	5.21884	0.795467	1
Solyc02g062463	SL3.0ch02	34616153	34618153	+	968	1066	788	1024	47.591	43.488	-4.1031	0.0301048	0.527958	9.60605	0.13702	1
Solyc02g062560	SL3.0ch02	34831522	34833522	-	726	299	551	289	70.829	65.595	-5.23403	0.0397143	-1.84909	1.15717	0.00772246	0.41851
Solyc02g062590	SL3.0ch02	34857393	34859393	-	251	677	168	773	27.047	17.853	-9.19407	2.01135e-05	-2.65321	-3.3412	0.188877	1
Solyc02g062750	SL3.0ch02	35069552	35071552	+	1387	258	957	226	84.316	80.896	-3.42008	0.0463692	0	-3.83033	1	1
Solyc02g062800	SL3.0ch02	35127081	35129081	-	115	574	81	586	16.691	12.144	-4.54693	0.0472469	0.430209	4.16484	0.351397	1
Solyc02g062830	SL3.0ch02	35208234	35210234	+	549	188	244	165	74.491	59.658	-14.8335	2.77417e-06	0	-3.6388	1	1
Solyc02g062860	SL3.0ch02	35342164	35344164	-	328	526	263	654	38.407	28.68	-9.72701	0.0001266	0	-3.91086	1	1
Solyc02g063100	SL3.0ch02	35711354	35713354	-	76	74	0	67	50.667	0	-50.6667	6.6868e-15	0	-3.83186	1	1
Solyc02g063125	SL3.0ch02	35711806	35713806	+	55	127	0	131	30.22	0	-30.2198	1.13085e-13	0	-3.76338	1	1
Solyc02g063210	SL3.0ch02	35813730	35815730	-	429	700	223	541	37.998	29.188	-8.80975	0.00046704	-3.61567	-3.72598	0.414927	1
Solyc02g064670	SL3.0ch02	36315954	36317954	+	898	287	882	380	75.781	69.889	-5.89153	0.00433664	0.284885	7.19699	0.353706	1
Solyc02g064830	SL3.0ch02	36526903	36528903	-	617	995	409	827	38.275	33.091	-5.18482	0.0143835	1.77769	2.77962	0.120138	1
Solyc02g064850	SL3.0ch02	36542771	36544771	-	660	723	508	772	47.722	39.688	-8.03484	0.000222724	0	-3.91086	1	1
Solyc02g064950	SL3.0ch02	36625852	36627852	-	3129	140	2860	176	95.717	94.203	-1.51445	0.0192804	-0.542268	5.67097	0.0939637	1
Solyc02g064955	SL3.0ch02	36616977	36618977	-	383	598	309	619	39.042	33.297	-5.74438	0.0272355	0	-3.91086	1	1
Solyc02g065050	SL3.0ch02	36736469	36738469	-	671	327	510	378	67.234	57.432	-9.80204	8.64832e-05	-0.0280888	-2.25186	1	1
Solyc02g065055	SL3.0ch02	36773932	36775932	-	72	460	30	328	13.534	8.38	-5.15395	0.043497	0	-3.91086	1	1
Solyc02g065300	SL3.0ch02	37057038	37059038	+	703	267	731	420	72.474	63.51	-8.96424	8.8079e-05	0.104114	7.39444	0.715335	1
Solyc02g065320	SL3.0ch02	37060876	37062876	+	16	197	4	255	7.512	1.544	-5.96734	0.00731583	-3.12474	-2.76245	0.140764	1
Solyc02g094758	SL3.0ch02	37061935	37063935	+	16	261	4	265	5.776	1.487	-4.28918	0.0281944	-3.68916	-2.83909	0.405623	1
Solyc02g065410	SL3.0ch02	37147617	37149617	-	591	717	546	936	45.183	36.842	-8.34138	6.82612e-05	0.605661	1.96958	0.202008	1
Solyc02g065560	SL3.0ch02	37285760	37287760	+	615	983	427	820	38.486	34.242	-4.24343	0.0479101	0.627299	2.67908	0.178164	1
Solyc02g065610	SL3.0ch02	37346980	37348980	-	67	723	31	592	8.481	4.976	-3.50509	0.0294942	0.358205	2.58883	0.547938	1
Solyc02g065660	SL3.0ch02	37383326	37385326	-	2860	163	2341	225	94.608	91.231	-3.37652	8.08648e-06	0.35667	4.94557	0.197082	1
Solyc02g065680	SL3.0ch02	37407371	37409371	+	1251	866	1106	896	59.093	55.245	-3.8483	0.032986	-0.52795	7.06401	0.104683	1
Solyc02g066830	SL3.0ch02	37545133	37547133	+	323	497	142	564	39.39	20.113	-19.2769	8.7623e-15	0.113853	3.9194	0.77778	1
Solyc02g067080	SL3.0ch02	37878724	37880724	-	302	670	197	636	31.07	23.649	-7.4205	0.00223425	-0.267263	6.36888	0.369328	1
Solyc02g067220	SL3.0ch02	37975646	37977646	-	257	529	138	428	32.697	24.382	-8.31558	0.00423951	-0.985827	-1.83221	0.531107	1
Solyc02g067470	SL3.0ch02	38233291	38235291	-	394	541	346	610	42.139	36.192	-5.94657	0.0233526	-0.0634618	4.25637	0.849884	1
Solyc02g067620	SL3.0ch02	38321925	38323925	-	113	314	74	311	26.464	19.221	-7.24292	0.0382319	0.662756	4.40241	0.0480568	0.994919
Solyc02g067640	SL3.0ch02	38335383	38337383	+	132	112	86	123	54.098	41.148	-12.95	0.0187178	0	-3.60824	1	1
Solyc02g067660	SL3.0ch02	38365940	38367940	-	378	512	280	558	42.472	33.413	-9.05902	0.000622964	0.834548	3.68624	0.244771	1
Solyc02g067670	SL3.0ch02	38368483	38370483	+	32	351	1	123	8.355	0.806	-7.54864	0.00511354	0.0432396	5.85401	0.883037	1
Solyc02g067690	SL3.0ch02	38386602	38388602	-	681	752	395	568	47.523	41.018	-6.50503	0.00704411	-0.509985	6.19005	0.136704	1
Solyc02g067700	SL3.0ch02	38397742	38399742	-	46	438	10	311	9.504	3.115	-6.38887	0.00168695	2.30193	-0.500081	0.0281043	0.792453
Solyc02g067790	SL3.0ch02	38465948	38467948	+	733	408	774	527	64.242	59.493	-4.7492	0.0418118	3.83682	1.80274	0.000247418	0.0376076
Solyc02g067890	SL3.0ch02	38551720	38553720	-	212	512	54	746	29.282	6.75	-22.5318	3.76303e-30	0.00971685	5.38087	0.974824	1
Solyc02g068160	SL3.0ch02	38762290	38764290	-	405	364	268	429	52.666	38.451	-14.2153	7.64531e-07	-0.453876	-1.96967	0.691358	1
Solyc02g068370	SL3.0ch02	38890071	38892071	+	495	212	546	346	70.014	61.211	-8.80338	0.00133414	0.34004	4.62995	0.306603	1
Solyc02g068445	SL3.0ch02	38959122	38961122	-	26	318	2	144	7.558	1.37	-6.18828	0.015597	0.303671	0.667667	0.59204	1
Solyc02g068720	SL3.0ch02	39226379	39228379	-	382	534	286	588	41.703	32.723	-8.97994	0.00053075	0.0230331	3.67463	0.969898	1
Solyc02g068780	SL3.0ch02	39260598	39262598	+	1122	487	922	488	69.733	65.39	-4.34268	0.029735	0.325378	5.44107	0.323887	1
Solyc02g069070	SL3.0ch02	39611427	39613427	-	184	260	151	471	41.441	24.277	-17.1649	5.40514e-08	0.173919	2.18578	0.736598	1
Solyc02g069250	SL3.0ch02	39757969	39759969	-	213	645	205	816	24.825	20.078	-4.74682	0.0359622	2.32508	2.42111	0.0301267	0.812405
Solyc02g069310	SL3.0ch02	39805498	39807498	+	185	794	149	857	18.897	14.811	-4.0857	0.0399161	-0.0347964	5.76724	0.90982	1
Solyc02g069350	SL3.0ch02	39838562	39840562	+	41	362	21	462	10.174	4.348	-5.82587	0.00356526	-0.0893939	1.68638	0.876324	1
Solyc02g069360	SL3.0ch02	39844377	39846377	+	229	565	115	411	28.841	21.863	-6.97819	0.0150437	0	-3.91086	1	1
Solyc02g069370	SL3.0ch02	39856476	39858476	-	18	447	6	503	3.871	1.179	-2.69219	0.0204986	-0.0134359	5.80707	0.961044	1
Solyc02g069543	SL3.0ch02	39973191	39975191	-	35	732	11	556	4.563	1.94	-2.6232	0.0261002	0	-3.87283	1	1
Solyc02g069840	SL3.0ch02	40234295	40236295	+	391	354	275	343	52.483	44.498	-7.98484	0.0126373	0.397019	4.66324	0.301476	1
Solyc02g069950	SL3.0ch02	40295935	40297935	+	582	493	278	564	54.14	33.017	-21.1229	1.12326e-18	0.0550682	7.20474	0.823282	1
Solyc02g069960	SL3.0ch02	40308744	40310744	-	495	294	382	292	62.738	56.677	-6.06108	0.0441089	0	-3.76056	1	1
Solyc02g070180	SL3.0ch02	40533267	40535267	-	726	734	537	666	49.726	44.638	-5.08762	0.0248412	2.25796	-0.567037	0.185663	1
Solyc02g070310	SL3.0ch02	40662617	40664617	-	498	685	188	604	42.096	23.737	-18.359	8.7731e-16	0.0786002	9.35392	0.794033	1
Solyc02g070420	SL3.0ch02	40711836	40713836	-	501	303	413	391	62.313	51.368	-10.9453	8.68986e-05	0.0277281	-0.261442	0.981247	1
Solyc02g070570	SL3.0ch02	40869633	40871633	+	15	225	9	480	6.25	1.84	-4.40951	0.0106424	0.206528	8.66759	0.495539	1
Solyc02g070650	SL3.0ch02	40900084	40902084	+	81	232	61	367	25.879	14.252	-11.6263	0.000564435	0.163748	7.19389	0.629062	1
Solyc02g070760	SL3.0ch02	40949794	40951794	-	126	646	79	599	16.321	11.652	-4.66933	0.0324108	-0.908082	2.07981	0.0485476	0.997644
Solyc02g071030	SL3.0ch02	41091736	41093736	+	837	479	559	421	63.602	57.041	-6.56101	0.00600772	0	-3.91086	1	1
Solyc02g071060	SL3.0ch02	41119078	41121078	-	936	470	707	522	66.572	57.526	-9.04539	1.75758e-05	-0.0607063	0.997371	0.946055	1
Solyc02g071130	SL3.0ch02	41180342	41182342	-	319	771	215	671	29.266	24.266	-4.99969	0.0362267	3.12234	0.58249	0.0664308	1
Solyc02g071240	SL3.0ch02	41266085	41268085	+	537	226	438	240	70.38	64.602	-5.77831	0.0479475	0.196132	3.21896	0.629441	1
Solyc02g071285	SL3.0ch02	41347199	41349199	+	962	632	573	472	60.351	54.833	-5.51878	0.0163546	-0.179047	4.42385	0.653254	1
Solyc02g071815	SL3.0ch02	41735189	41737189	-	143	302	127	376	32.135	25.249	-6.88632	0.0484551	-0.992749	-1.63542	0.355455	1
Solyc02g071980	SL3.0ch02	41872972	41874972	+	600	256	534	314	70.093	62.972	-7.12176	0.00742784	0.0673435	5.46404	0.831471	1
Solyc02g072310	SL3.0ch02	42160428	42162428	+	142	120	166	268	54.198	38.249	-15.9496	0.000349237	1.27323	-2.36219	0.505075	1
Solyc02g073571	SL3.0ch02	42319336	42321336	-	1279	163	550	105	88.696	83.969	-4.72679	0.0102674	-4.66596	0.835815	2.3621e-10	2.16635e-07
Solyc02g074590	SL3.0ch02	42319336	42321336	-	1279	163	550	105	88.696	83.969	-4.72679	0.0102674	0	-3.91086	1	1
Solyc02g076670	SL3.0ch02	42384310	42386310	+	182	732	122	693	19.912	14.969	-4.94315	0.022124	0	-3.87203	1	1
Solyc02g076860	SL3.0ch02	42550568	42552568	-	221	831	112	665	21.008	14.414	-6.59319	0.00145835	0	-2.70117	1	1
Solyc02g077030	SL3.0ch02	42671786	42673786	+	118	148	12	99	44.361	10.811	-33.5501	1.1391e-09	-1.72854	-2.77402	0.243214	1
Solyc02g077240	SL3.0ch02	42805940	42807940	+	976	397	901	481	71.085	65.195	-5.88985	0.0038255	0.720788	8.19402	0.00793206	0.424087
Solyc02g077410	SL3.0ch02	42925357	42927357	-	796	527	663	547	60.166	54.793	-5.3729	0.0202235	0.386399	7.60009	0.170017	1
Solyc02g077420	SL3.0ch02	42929949	42931949	-	35	129	4	110	21.341	3.509	-17.8327	0.000100511	-0.92501	-3.76322	1	1
Solyc02g077520	SL3.0ch02	42983527	42985527	+	251	588	203	615	29.917	24.817	-5.09994	0.047977	6.25926	0.479907	0.00498185	0.316502
Solyc02g077560	SL3.0ch02	43026002	43028002	+	70	652	37	645	9.695	5.425	-4.27007	0.00883214	0.127841	6.55171	0.641865	1
Solyc02g077565	SL3.0ch02	43031923	43033923	+	8	91	1	107	8.081	0.926	-7.15488	0.0371887	0	-3.69406	1	1
Solyc02g077620	SL3.0ch02	43072561	43074561	-	272	735	171	651	27.011	20.803	-6.208	0.00761993	0.592288	1.28243	0.308182	1
Solyc02g077760	SL3.0ch02	43185912	43187912	+	41	539	23	579	7.069	3.821	-3.24837	0.0364153	0.394778	3.2951	0.350116	1
Solyc02g077920	SL3.0ch02	43313396	43315396	-	943	567	718	640	62.45	52.872	-9.57846	2.75753e-06	-0.492219	8.34323	0.165853	1
Solyc02g078080	SL3.0ch02	43438808	43440808	-	167	210	159	333	44.297	32.317	-11.98	0.00154439	0	-3.91086	1	1
Solyc02g078100	SL3.0ch02	43451944	43453944	-	353	340	250	351	50.938	41.597	-9.34061	0.00340536	7.23926	-2.60765	0.0215828	0.693925
Solyc02g078160	SL3.0ch02	43500291	43502291	+	47	734	15	568	6.018	2.573	-3.44503	0.00833733	-0.832799	7.44859	0.0199388	0.670905
Solyc02g078280	SL3.0ch02	43592275	43594275	-	283	137	241	271	67.381	47.07	-20.3106	1.02428e-08	0.193307	0.915476	0.726253	1
Solyc02g078300	SL3.0ch02	43614913	43616913	-	383	656	247	643	36.862	27.753	-9.10956	0.000154468	0.169135	3.18192	0.673297	1
Solyc02g078330	SL3.0ch02	43628124	43630124	-	476	240	408	293	66.48	58.203	-8.27788	0.00556869	-0.163313	2.35033	0.684834	1
Solyc02g078400	SL3.0ch02	43667137	43669137	-	142	919	89	899	13.384	9.008	-4.3755	0.00741879	1.74713	8.94594	0.0104484	0.485901
Solyc02g079020	SL3.0ch02	44199609	44201609	-	11	677	0	367	1.599	0	-1.59884	0.0284666	0.183929	4.03738	0.586259	1
Solyc02g079130	SL3.0ch02	44298103	44300103	-	1508	401	1268	558	78.994	69.441	-9.55284	5.10397e-10	0.0148441	4.3046	0.967395	1
Solyc02g079180	SL3.0ch02	44345042	44347042	-	21	771	6	665	2.652	0.894	-1.75733	0.0424194	-3.46973	-2.10284	0.0667152	1
Solyc02g079250	SL3.0ch02	44407311	44409311	+	492	552	362	587	47.126	38.145	-8.98102	0.000339725	-0.318997	3.19844	0.350436	1
Solyc02g079320	SL3.0ch02	44484028	44486028	-	108	114	118	253	48.649	31.806	-16.8427	0.000347112	-0.599087	1.48707	0.438863	1
Solyc02g079340	SL3.0ch02	44497290	44499290	-	146	248	148	383	37.056	27.872	-9.1839	0.0112671	-0.839612	1.74183	0.3547	1
Solyc02g079520	SL3.0ch02	44611094	44613094	-	794	675	691	706	54.05	49.463	-4.58724	0.0373881	-1.1445	3.91133	0.0486852	0.99772
Solyc02g079720	SL3.0ch02	44733382	44735382	+	1579	199	1379	249	88.808	84.705	-4.10249	0.00209556	1.3136	-0.535652	0.369546	1
Solyc02g079730	SL3.0ch02	44734117	44736117	+	626	369	418	320	62.915	56.64	-6.27501	0.0238509	-0.756812	3.42577	0.056097	1
Solyc02g079790	SL3.0ch02	44789846	44791846	+	308	673	276	769	31.397	26.411	-4.98505	0.0355621	-0.161737	4.71128	0.793235	1
Solyc02g079940	SL3.0ch02	44880776	44882776	+	1149	361	819	404	76.093	66.966	-9.12624	1.86852e-06	0.528062	-2.65321	0.79177	1
Solyc02g079980	SL3.0ch02	44904074	44906074	-	201	861	182	1023	18.927	15.104	-3.82282	0.038788	0.69667	-0.280561	0.516577	1
Solyc02g080280	SL3.0ch02	45104901	45106901	-	233	866	151	842	21.201	15.206	-5.99465	0.00206295	0.856023	-1.38421	0.388015	1
Solyc02g080330	SL3.0ch02	45131348	45133348	+	89	664	54	646	11.819	7.714	-4.1051	0.0279083	-1.93933	-3.87098	1	1
Solyc02g080480	SL3.0ch02	45244747	45246747	-	212	706	129	646	23.094	16.645	-6.44852	0.00412083	0.391987	1.99225	0.571749	1
Solyc02g080710	SL3.0ch02	45422857	45424857	+	368	267	337	326	57.953	50.83	-7.12319	0.0279083	-3.66702	-3.75752	0.44125	1
Solyc02g080790	SL3.0ch02	45473114	45475114	-	250	754	195	763	24.9	20.355	-4.54549	0.0422388	0.188982	-1.64262	0.874491	1
Solyc02g081180	SL3.0ch02	45793401	45795401	+	683	569	527	555	54.553	48.706	-5.84662	0.0163748	-3.61682	-3.75958	0.440506	1
Solyc02g081360	SL3.0ch02	45906493	45908493	+	52	400	29	456	11.504	5.979	-5.52504	0.011323	2.17275	1.71057	0.0966252	1
Solyc02g081570	SL3.0ch02	46027384	46029384	-	62	475	35	460	11.546	7.071	-4.47492	0.0356665	-1.71153	-3.44746	0.608262	1
Solyc02g081580	SL3.0ch02	46032395	46034395	-	988	260	880	319	79.167	73.394	-5.77217	0.00359112	0.460633	6.7169	0.0873445	1
Solyc02g081810	SL3.0ch02	46170474	46172474	+	637	457	517	460	58.227	52.917	-5.3096	0.0405706	0.242301	6.32149	0.500102	1
Solyc02g081860	SL3.0ch02	46201270	46203270	-	1893	489	1417	442	79.471	76.224	-3.24726	0.0317583	0.541044	1.41427	0.301594	1
Solyc02g081870	SL3.0ch02	46202079	46204079	+	1601	355	1237	432	81.851	74.116	-7.73448	3.06423e-07	0	-3.91086	1	1
Solyc02g082190	SL3.0ch02	46443747	46445747	+	114	247	97	308	31.579	23.951	-7.62833	0.044799	0.388443	5.09651	0.280569	1
Solyc02g082230	SL3.0ch02	46485455	46487455	-	1233	520	1139	601	70.337	65.46	-4.8768	0.00746456	0.165648	4.85965	0.56926	1
Solyc02g082250	SL3.0ch02	46496834	46498834	+	326	608	133	492	34.904	21.28	-13.6236	9.67061e-08	0.171191	0.492702	0.794091	1
Solyc02g082300	SL3.0ch02	46563892	46565892	+	19	281	4	292	6.333	1.351	-4.98198	0.00774346	-0.0694396	1.39064	0.894101	1
Solyc02g082370	SL3.0ch02	46611888	46613888	+	369	121	250	120	75.306	67.568	-7.73855	0.0354767	0	-3.70973	1	1
Solyc02g082390	SL3.0ch02	46627406	46629406	-	421	308	346	404	57.75	46.133	-11.617	7.2398e-05	-4.58641	-3.32695	0.167167	1
Solyc02g082540	SL3.0ch02	46769696	46771696	-	2211	378	1973	479	85.4	80.465	-4.93484	2.76688e-05	0.140143	6.60262	0.638528	1
Solyc02g082550	SL3.0ch02	46776440	46778440	+	1845	160	1411	162	92.02	89.701	-2.31874	0.0437732	-0.105958	5.50416	0.815722	1
Solyc02g082830	SL3.0ch02	47032568	47034568	+	120	334	72	332	26.432	17.822	-8.60994	0.0103745	0.057646	5.14558	0.862459	1
Solyc02g082880	SL3.0ch02	47080753	47082753	+	29	864	11	798	3.247	1.36	-1.88778	0.0277712	2.53593	-3.02603	0.64947	1
Solyc02g083180	SL3.0ch02	47233513	47235513	-	904	323	796	371	73.676	68.209	-5.46655	0.0112447	-0.215394	-0.665135	0.784135	1
Solyc02g083280	SL3.0ch02	47281088	47283088	+	70	1118	23	706	5.892	3.155	-2.73725	0.0183003	-0.505763	7.72773	0.173513	1
Solyc02g083520	SL3.0ch02	47441139	47443139	+	222	642	149	606	25.694	19.735	-5.95935	0.014094	0.835218	-2.8956	0.641529	1
Solyc02g083610	SL3.0ch02	47514187	47516187	-	86	1104	24	867	7.227	2.694	-4.53329	2.2499e-05	-0.603197	-0.404113	0.43263	1
Solyc02g083835	SL3.0ch02	47661223	47663223	-	481	354	440	429	57.605	50.633	-6.97188	0.0132072	-0.0120024	6.54368	0.984115	1
Solyc02g083910	SL3.0ch02	47722950	47724950	+	1397	284	1396	380	83.105	78.604	-4.50169	0.00363746	0	-3.91086	1	1
Solyc02g084117	SL3.0ch02	47879052	47881052	-	1043	141	252	351	88.091	41.791	-46.3002	2.89967e-90	2.64661	0.81211	0.0539986	1
Solyc02g084300	SL3.0ch02	47996574	47998574	+	23	634	2	293	3.501	0.678	-2.82279	0.0348253	-0.357138	-1.2362	0.817275	1
Solyc02g084310	SL3.0ch02	47997242	47999242	+	13	253	1	191	4.887	0.521	-4.36638	0.0278342	0.680659	-1.69089	0.66097	1
Solyc02g084480	SL3.0ch02	48117364	48119364	+	3745	906	2030	818	80.52	71.278	-9.24223	3.15902e-18	-0.268604	6.1511	0.507016	1
Solyc02g084560	SL3.0ch02	48276382	48278382	+	13	218	2	312	5.628	0.637	-4.99076	0.00299335	-0.281197	2.84886	0.482247	1
Solyc02g084620	SL3.0ch02	48348714	48350714	-	499	718	542	1017	41.002	34.766	-6.23659	0.00333231	-0.436378	4.1958	0.176846	1
Solyc02g084680	SL3.0ch02	48413576	48415576	+	349	756	332	934	31.584	26.224	-5.35938	0.0132965	0.52551	-0.744216	0.610216	1
Solyc02g084720	SL3.0ch02	48462070	48464070	-	334	1028	259	1224	24.523	17.465	-7.05816	3.17186e-05	-1.08698	5.83633	0.0144705	0.582053
Solyc02g084890	SL3.0ch02	48590733	48592733	-	538	102	813	615	84.063	56.933	-27.1297	1.43065e-33	4.16529	6.12622	1.3483e-10	1.30341e-07
Solyc02g085370	SL3.0ch02	48943223	48945223	-	1023	259	1010	371	79.797	73.135	-6.66178	0.000357856	0.00613842	2.70935	0.994082	1
Solyc02g085380	SL3.0ch02	48942742	48944742	+	1021	461	1016	598	68.893	62.949	-5.94419	0.00249393	0.535938	1.21461	0.531876	1
Solyc02g085410	SL3.0ch02	48959442	48961442	+	83	224	49	249	27.036	16.443	-10.5929	0.0061372	0	-3.87229	1	1
Solyc02g085640	SL3.0ch02	49107948	49109948	+	566	169	670	372	77.007	64.299	-12.7074	1.16521e-07	0.603604	5.80569	0.0281377	0.792453
Solyc02g085670	SL3.0ch02	49132306	49134306	+	411	470	304	573	46.652	34.664	-11.9879	3.56538e-06	-0.079014	3.14393	0.845563	1
Solyc02g085780	SL3.0ch02	49199954	49201954	-	442	308	412	581	58.933	41.49	-17.4429	1.35248e-11	0.223909	5.76981	0.406566	1
Solyc02g085790	SL3.0ch02	49200112	49202112	+	437	194	404	447	69.255	47.474	-21.7816	1.53024e-15	-0.0468551	6.57168	0.866379	1
Solyc02g085850	SL3.0ch02	49271588	49273588	+	24	1	364	337	96	51.926	-44.0742	3.43826e-05	0.622685	1.18536	0.227817	1
Solyc02g086010	SL3.0ch02	49440087	49442087	+	960	361	856	430	72.672	66.563	-6.10923	0.00323025	-0.123222	-1.70731	0.957329	1
Solyc02g086240	SL3.0ch02	49596959	49598959	+	862	95	849	147	90.073	85.241	-4.83218	0.00483021	0.126715	7.35097	0.669865	1
Solyc02g086408	SL3.0ch02	49715662	49717662	-	10	151	6	481	6.211	1.232	-4.97915	0.00524728	1.83734	-2.99723	1	1
Solyc02g086445	SL3.0ch02	49745021	49747021	+	38	239	4	128	13.718	3.03	-10.6881	0.00203007	0	-3.91086	1	1
Solyc02g086630	SL3.0ch02	49931205	49933205	-	1166	596	1073	646	66.175	62.42	-3.75479	0.0492293	-0.906229	-0.289437	0.294598	1
Solyc02g086710	SL3.0ch02	49987859	49989859	+	1016	705	825	677	59.035	54.927	-4.10868	0.0473528	-0.157784	6.39076	0.602074	1
Solyc02g087480	SL3.0ch02	50549900	50551900	+	100	1167	62	1160	7.893	5.074	-2.81901	0.0140035	-0.215554	6.4524	0.58535	1
Solyc02g087720	SL3.0ch02	50676901	50678901	-	662	312	557	343	67.967	61.889	-6.07826	0.019372	0.0350522	5.10757	0.904468	1
Solyc02g087730	SL3.0ch02	50676864	50678864	+	663	318	557	352	67.584	61.276	-6.30797	0.0142407	0.274414	4.95785	0.320753	1
Solyc02g087870	SL3.0ch02	50782613	50784613	-	180	841	122	816	17.63	13.006	-4.62338	0.0150039	-0.272222	4.57462	0.514362	1
Solyc02g088010	SL3.0ch02	50881791	50883791	-	245	413	144	407	37.234	26.134	-11.0997	0.000278532	0.0526394	4.62827	0.84993	1
Solyc02g088020	SL3.0ch02	50890773	50892773	-	27	199	4	202	11.947	1.942	-10.0052	0.000292527	0	-3.87283	1	1
Solyc02g088090	SL3.0ch02	50914676	50916676	+	35	440	16	480	7.368	3.226	-4.14261	0.0127129	0.43042	6.51681	0.382186	1
Solyc02g088210	SL3.0ch02	51005851	51007851	+	849	514	651	523	62.289	55.451	-6.83762	0.00226488	-0.971811	2.64815	0.092166	1
Solyc02g088400	SL3.0ch02	51128670	51130670	-	121	1028	77	1124	10.531	6.411	-4.11957	0.00168547	0.345752	0.525322	0.537323	1
Solyc02g088530	SL3.0ch02	51228408	51230408	-	305	656	159	492	31.738	24.424	-7.31381	0.00624492	-0.288351	-0.765151	0.772474	1
Solyc02g088540	SL3.0ch02	51227817	51229817	+	307	703	163	634	30.396	20.452	-9.94435	1.72411e-05	0.112851	3.73082	0.764313	1
Solyc02g088620	SL3.0ch02	51292469	51294469	-	247	489	224	588	33.56	27.586	-5.97358	0.0292311	0.532124	6.29658	0.0720831	1
Solyc02g088940	SL3.0ch02	51492304	51494304	+	28	411	4	353	6.378	1.12	-5.25768	0.000550808	0.204396	5.6008	0.557487	1
Solyc02g089130	SL3.0ch02	51651059	51653059	-	367	544	285	695	40.285	29.082	-11.2038	3.77111e-06	0.142629	2.23909	0.778111	1
Solyc02g089140	SL3.0ch02	51652470	51654470	+	1083	971	782	960	52.726	44.891	-7.83546	1.51577e-05	3.95085	-0.754858	0.15126	1
Solyc02g089195	SL3.0ch02	51713362	51715362	-	21	396	9	451	5.036	1.957	-3.07945	0.0369806	-0.150897	-2.88006	1	1
Solyc02g089205	SL3.0ch02	51714452	51716452	+	27	546	6	540	4.712	1.099	-3.61314	0.00148697	-0.0595222	5.6912	0.868465	1
Solyc02g089490	SL3.0ch02	51938156	51940156	+	1279	311	1069	347	80.44	75.494	-4.9459	0.00434279	0.552676	3.59163	0.275154	1
Solyc02g089510	SL3.0ch02	51950172	51952172	+	30	431	10	515	6.508	1.905	-4.60283	0.00141514	-0.370672	-2.29742	1	1
Solyc02g089800	SL3.0ch02	52141765	52143765	-	54	379	23	414	12.471	5.263	-7.20797	0.000992941	0.0251273	5.5872	0.93452	1
Solyc02g089860	SL3.0ch02	52200211	52202211	-	165	901	122	975	15.478	11.121	-4.35718	0.00984282	-0.915989	-0.677355	0.459306	1
Solyc02g089870	SL3.0ch02	52200144	52202144	+	158	914	117	971	14.739	10.754	-3.98513	0.0167467	0.154019	4.90539	0.610205	1
Solyc02g090200	SL3.0ch02	52467671	52469671	-	718	298	615	331	70.669	65.011	-5.65872	0.0220026	0.332955	3.06668	0.392767	1
Solyc02g090570	SL3.0ch02	52738534	52740534	+	817	633	793	804	56.345	49.656	-6.68922	0.00123275	-0.203608	6.37063	0.486409	1
Solyc02g090830	SL3.0ch02	52946971	52948971	+	80	531	39	611	13.093	6	-7.09329	0.0001324	-0.0288202	-3.48879	1	1
Solyc02g091290	SL3.0ch02	53262359	53264359	+	405	1295	30	1086	23.824	2.688	-21.1354	3.85721e-60	-0.805175	2.66472	0.0696412	1
Solyc02g091440	SL3.0ch02	53373401	53375401	-	899	1155	664	1072	43.768	38.249	-5.51941	0.00283019	1.90131	-3.87171	1	1
Solyc02g091623	SL3.0ch02	53498389	53500389	+	82	392	63	551	17.3	10.261	-7.03899	0.00353135	2.62767	-3.61211	0.597833	1
Solyc02g091650	SL3.0ch02	53528955	53530955	+	362	278	294	437	56.563	40.219	-16.3436	2.76013e-08	1.43806	2.91256	0.0788306	1
Solyc02g091940	SL3.0ch02	53801146	53803146	-	140	337	1	60	29.35	1.639	-27.7108	1.18058e-06	-0.424807	0.488313	0.478496	1
Solyc02g092180	SL3.0ch02	53988393	53990393	+	1188	732	921	689	61.875	57.205	-4.67003	0.0160835	0	-3.8294	1	1
Solyc02g092190	SL3.0ch02	53992432	53994432	+	162	1172	103	1175	12.144	8.059	-4.08446	0.00257523	-3.08469	-3.13472	0.140837	1
Solyc02g092527	SL3.0ch02	54228779	54230779	+	2	18	1	245	10	0.407	-9.5935	0.0381018	-1.09872	0.185559	0.103702	1
Solyc02g092530	SL3.0ch02	54237659	54239659	-	232	636	146	533	26.728	21.502	-5.2259	0.0466457	-1.40434	2.35078	0.0198941	0.670662
Solyc02g092650	SL3.0ch02	54306115	54308115	-	399	327	182	319	54.959	36.327	-18.6313	2.66417e-09	0.0639716	3.48998	0.903089	1
Solyc02g092660	SL3.0ch02	54305330	54307330	+	405	454	186	383	47.148	32.689	-14.4589	6.67572e-07	-0.47213	3.86576	0.203462	1
Solyc02g092670	SL3.0ch02	54318183	54320183	-	65	431	41	450	13.105	8.35	-4.75453	0.0427245	0.0371598	6.81005	0.918771	1
Solyc02g092980	SL3.0ch02	54571685	54573685	-	428	572	301	568	42.8	34.638	-8.16249	0.00172851	-0.319615	3.59438	0.500503	1
Solyc02g093100	SL3.0ch02	54658446	54660446	+	35	455	15	410	7.143	3.529	-3.61345	0.0450573	-0.231352	4.00931	0.529469	1
Solyc02g093240	SL3.0ch02	54806676	54808676	-	914	273	819	317	77.001	72.095	-4.90577	0.0215524	0	-3.68812	1	1
Solyc02g093410	SL3.0ch02	54921706	54923706	+	195	629	36	666	23.665	5.128	-18.5368	5.99455e-24	0.541076	4.38689	0.173617	1
Solyc02g093460	SL3.0ch02	54959313	54961313	+	1670	535	1594	710	75.737	69.184	-6.55293	9.1578e-06	-0.259376	3.71503	0.512993	1
Solyc02g093695	SL3.0ch02	55075662	55077662	+	43	690	20	645	5.866	3.008	-2.85878	0.0344473	0.794703	-3.65092	1	1
Solyc02g093710	SL3.0ch02	55097784	55099784	+	1041	73	645	71	93.447	90.084	-3.36324	0.026846	0.649607	4.40219	0.195591	1
Solyc02g094010	SL3.0ch02	55305978	55307978	-	884	480	715	513	64.809	58.225	-6.58463	0.00260815	0.158561	3.72805	0.844831	1
Solyc02g094150	SL3.0ch02	55411263	55413263	+	27	495	6	333	5.172	1.77	-3.4025	0.0284427	-0.0908082	4.15707	0.785937	1
Solyc02g094485	SL3.0ch02	55623710	55625710	-	671	185	557	207	78.388	72.906	-5.48209	0.0283082	0.176906	4.36096	0.594062	1
Solyc02g094630	SL3.0ch02	55856606	55858606	-	1018	714	774	667	58.776	53.713	-5.06328	0.014179	0.402183	1.47316	0.502518	1
Solyc03g005260	SL3.0ch03	153939	155939	-	156	629	108	702	19.873	13.333	-6.53928	0.00209622	0.139746	5.2107	0.669466	1
Solyc03g005430	SL3.0ch03	317879	319879	-	316	431	159	482	42.303	24.805	-17.4976	1.32201e-10	0.194692	6.18996	0.533195	1
Solyc03g005650	SL3.0ch03	467978	469978	-	530	836	315	820	38.799	27.753	-11.0461	8.64612e-08	0	-3.66258	1	1
Solyc03g005660	SL3.0ch03	467597	469597	+	521	657	298	545	44.228	35.35	-8.87756	0.000386799	0.30268	3.89654	0.332493	1
Solyc03g005700	SL3.0ch03	500525	502525	-	900	506	667	497	64.011	57.302	-6.70897	0.00248645	0.570894	-0.026666	0.309362	1
Solyc03g005810	SL3.0ch03	552971	554971	-	155	332	54	196	31.828	21.6	-10.2275	0.0111835	0.210939	-0.957576	0.877514	1
Solyc03g005820	SL3.0ch03	558030	560030	-	361	575	240	647	38.568	27.057	-11.5109	2.29005e-06	-1.94111	-0.573193	0.123626	1
Solyc03g005880	SL3.0ch03	595848	597848	-	284	566	187	554	33.412	25.236	-8.1756	0.00196641	-1.41969	-0.862392	0.0874194	1
Solyc03g006260	SL3.0ch03	885678	887678	-	953	473	798	499	66.83	61.527	-5.30369	0.0127495	0.36347	0.922579	0.673144	1
Solyc03g006420	SL3.0ch03	1022898	1024898	-	307	393	210	356	43.857	37.102	-6.75467	0.0387775	-0.147906	4.1116	0.659349	1
Solyc03g006680	SL3.0ch03	1250975	1252975	+	601	379	516	408	61.327	55.844	-5.48237	0.038253	0.108442	6.03186	0.676471	1
Solyc03g006810	SL3.0ch03	1318323	1320323	+	234	827	194	946	22.055	17.018	-5.03712	0.0102438	0.388767	0.354733	0.511186	1
Solyc03g006870	SL3.0ch03	1380835	1382835	+	883	595	703	759	59.743	48.085	-11.6581	4.43786e-09	-0.760022	3.86921	0.0497054	1
Solyc03g006880	SL3.0ch03	1406546	1408546	+	448	490	320	444	47.761	41.885	-5.87638	0.0400678	-3.38379	-2.19536	0.0155448	0.599993
Solyc03g006890	SL3.0ch03	1421023	1423023	+	1409	444	1267	566	76.039	69.122	-6.9172	2.33381e-05	0	-3.91086	1	1
Solyc03g007030	SL3.0ch03	1573515	1575515	-	813	661	522	635	55.156	45.117	-10.0394	3.47805e-06	-2.93723	0.714253	0.000434482	0.0563064
Solyc03g007040	SL3.0ch03	1574227	1576227	+	343	674	240	626	33.727	27.714	-6.01302	0.0157181	0.229823	4.49166	0.42049	1
Solyc03g007050	SL3.0ch03	1611104	1613104	+	699	696	609	797	50.108	43.314	-6.79316	0.00156741	2.93242	-1.66603	0.0948797	1
Solyc03g007080	SL3.0ch03	1639532	1641532	-	370	618	262	561	37.449	31.835	-5.61464	0.0339501	0.5628	-3.62666	1	1
Solyc03g007350	SL3.0ch03	1905175	1907175	+	321	901	289	1116	26.268	20.569	-5.69902	0.00267574	0	-3.91086	1	1
Solyc03g007490	SL3.0ch03	2066338	2068338	+	690	742	459	604	48.184	43.18	-5.00468	0.0338727	-0.0708521	2.68273	0.85274	1
Solyc03g007670	SL3.0ch03	2198942	2200942	+	518	735	321	613	41.341	34.368	-6.97247	0.00407072	-0.0636261	6.86939	0.805305	1
Solyc03g007760	SL3.0ch03	2288205	2290205	-	901	276	729	283	76.551	72.036	-4.51498	0.039379	-0.144346	5.12798	0.738076	1
Solyc03g007840	SL3.0ch03	2386248	2388248	-	1300	363	1263	494	78.172	71.884	-6.28809	0.000161996	0.336251	1.22175	0.511783	1
Solyc03g007910	SL3.0ch03	2422899	2424899	+	290	292	288	399	49.828	41.921	-7.90678	0.0168414	4.63761	-3.61738	0.244994	1
Solyc03g007960	SL3.0ch03	2445877	2447877	+	103	724	33	670	12.455	4.694	-7.76049	8.44866e-07	0.605679	5.03362	0.139766	1
Solyc03g007980	SL3.0ch03	2466106	2468106	-	618	565	485	552	52.24	46.77	-5.47054	0.0285452	-0.169278	5.24898	0.584366	1
Solyc03g025100	SL3.0ch03	2601801	2603801	-	89	103	1	98	46.354	1.01	-45.3441	1.64504e-17	-5.1398	-3.31471	0.0437691	0.958098
Solyc03g025240	SL3.0ch03	2720155	2722155	+	272	52	183	88	83.951	67.528	-16.4229	2.50149e-05	-0.431951	-3.59321	1	1
Solyc03g025300	SL3.0ch03	2769269	2771269	-	501	319	415	355	61.098	53.896	-7.20146	0.0123944	-3.61673	-3.68591	0.4385	1
Solyc03g025490	SL3.0ch03	2913898	2915898	+	746	558	661	694	57.209	48.782	-8.4263	0.000114775	0	-3.86962	1	1
Solyc03g025600	SL3.0ch03	3019910	3021910	+	356	18	138	178	95.187	43.671	-51.5163	1.03909e-52	-0.09641	5.67794	0.731591	1
Solyc03g025770	SL3.0ch03	3192046	3194046	-	178	836	125	853	17.554	12.781	-4.77305	0.0110292	0	-3.91086	1	1
Solyc03g025830	SL3.0ch03	3255913	3257913	-	423	1185	316	1136	26.306	21.763	-4.54288	0.0115601	-0.626531	0.194836	0.452424	1
Solyc03g025840	SL3.0ch03	3262615	3264615	+	406	790	253	676	33.946	27.234	-6.7129	0.00384524	-0.0552608	6.81549	0.852712	1
Solyc03g025870	SL3.0ch03	3285457	3287457	-	157	361	72	378	30.309	16	-14.3089	1.71449e-06	0.0370812	-1.0728	1	1
Solyc03g026290	SL3.0ch03	3754223	3756223	-	762	662	596	647	53.511	47.949	-5.56272	0.0144143	0.101121	4.42244	0.72969	1
Solyc03g026310	SL3.0ch03	3766019	3768019	+	1316	196	949	213	87.037	81.67	-5.3675	0.000794944	0.0183712	3.32764	0.973891	1
Solyc03g026377	SL3.0ch03	3869525	3871525	-	803	184	808	248	81.358	76.515	-4.8425	0.0222743	0	-3.91086	1	1
Solyc03g031570	SL3.0ch03	4094681	4096681	-	914	779	710	734	53.987	49.169	-4.81803	0.0207015	0.272774	-2.98935	0.922815	1
Solyc03g031810	SL3.0ch03	4315749	4317749	-	259	341	188	497	43.167	27.445	-15.7214	6.19126e-08	0	-3.91086	1	1
Solyc03g031980	SL3.0ch03	4497034	4499034	-	329	772	224	730	29.882	23.48	-6.40184	0.00467957	1.49676	-0.0858635	0.200982	1
Solyc03g032020	SL3.0ch03	4545973	4547973	-	724	399	473	354	64.47	57.195	-7.27549	0.00463507	0.151662	4.18454	0.739573	1
Solyc03g032060	SL3.0ch03	4597556	4599556	-	1130	824	852	817	57.83	51.049	-6.78156	0.000280608	0.665103	3.06491	0.24626	1
Solyc03g033260	SL3.0ch03	4861981	4863981	+	815	406	656	424	66.749	60.741	-6.00783	0.0104037	-0.0236108	-0.270471	0.983362	1
Solyc03g033350	SL3.0ch03	4950707	4952707	+	490	187	466	242	72.378	65.819	-6.55893	0.0245766	0.11369	0.453277	0.885292	1
Solyc03g033420	SL3.0ch03	5011090	5013090	-	962	282	672	250	77.331	72.885	-4.44616	0.0424945	0.186129	5.35856	0.504673	1
Solyc03g033510	SL3.0ch03	5075300	5077300	-	1250	1271	1043	1333	49.583	43.897	-5.68619	0.000411238	-0.071215	3.63872	0.86726	1
Solyc03g033860	SL3.0ch03	5491634	5493634	-	1072	687	915	690	60.944	57.009	-3.93437	0.0477362	-2.44314	-3.65539	0.470705	1
Solyc03g034010	SL3.0ch03	5755102	5757102	-	290	816	175	667	26.221	20.784	-5.43677	0.0162005	0.389675	-0.113575	0.748959	1
Solyc03g034030	SL3.0ch03	5775837	5777837	+	1196	947	1202	1115	55.81	51.877	-3.93218	0.0246249	2.79147	-2.74976	0.0733493	1
Solyc03g034060	SL3.0ch03	5801905	5803905	-	279	386	250	457	41.955	35.361	-6.59421	0.0324289	0.526842	-3.11978	0.8356	1
Solyc03g034150	SL3.0ch03	5875902	5877902	+	852	281	565	274	75.199	67.342	-7.85651	0.000783974	0.531064	-0.398929	0.64716	1
Solyc03g034180	SL3.0ch03	5912965	5914965	-	43	470	12	407	8.382	2.864	-5.5181	0.00183502	0.15899	6.02217	0.580271	1
Solyc03g034250	SL3.0ch03	5976870	5978870	-	468	292	398	395	61.579	50.189	-11.3898	5.403e-05	0.180168	4.72737	0.7007	1
Solyc03g034263	SL3.0ch03	6021605	6023605	+	204	199	133	225	50.62	37.151	-13.4695	0.00101873	0	-3.91086	1	1
Solyc03g034413	SL3.0ch03	6405148	6407148	-	38	296	18	325	11.377	5.248	-6.12943	0.0152137	0	-3.91086	1	1
Solyc03g034450	SL3.0ch03	6439662	6441662	+	346	285	226	302	54.834	42.803	-12.0306	0.000296512	0.310262	3.86078	0.329493	1
Solyc03g043710	SL3.0ch03	7250203	7252203	-	794	94	592	103	89.414	85.18	-4.23456	0.03514	0	-3.91086	1	1
Solyc03g043740	SL3.0ch03	7287372	7289372	-	246	801	166	706	23.496	19.037	-4.459	0.0448324	-0.61069	2.53484	0.320361	1
Solyc03g043990	SL3.0ch03	7807810	7809810	+	1610	319	1116	317	83.463	77.879	-5.58436	0.000312292	0	-3.91086	1	1
Solyc03g044026	SL3.0ch03	7873468	7875468	+	316	109	268	149	74.353	64.269	-10.0844	0.00625103	-0.909859	-2.47771	0.482246	1
Solyc03g044180	SL3.0ch03	8428699	8430699	+	232	414	211	502	35.913	29.593	-6.32004	0.037067	5.64301	2.08409	0.00269666	0.21482
Solyc03g044590	SL3.0ch03	10198246	10200246	-	437	185	227	163	70.257	58.205	-12.0521	0.000593366	1.19292	-2.02128	0.598015	1
Solyc03g044660	SL3.0ch03	10321696	10323696	-	486	1212	432	1358	28.622	24.134	-4.48783	0.00933642	-0.32693	4.6313	0.362173	1
Solyc03g045000	SL3.0ch03	11304704	11306704	-	419	154	451	229	73.124	66.324	-6.80038	0.0264864	3.29831	-3.71413	0.522476	1
Solyc03g046310	SL3.0ch03	12244950	12246950	-	237	269	114	286	46.838	28.5	-18.3379	2.30337e-07	0	-3.91086	1	1
Solyc03g046470	SL3.0ch03	12924972	12926972	-	129	206	80	198	38.507	28.777	-9.73048	0.0334046	-0.150871	4.70363	0.639198	1
Solyc03g071650	SL3.0ch03	20421800	20423800	+	328	287	306	452	53.333	40.369	-12.9639	1.88614e-05	-0.362233	1.53128	0.622974	1
Solyc03g051645	SL3.0ch03	22342047	22344047	-	418	58	360	79	87.815	82.005	-5.81057	0.0387986	0	-3.91086	1	1
Solyc03g053040	SL3.0ch03	23887140	23889140	+	190	221	73	312	46.229	18.961	-27.2677	6.61496e-15	-0.0326349	0.541036	0.975375	1
Solyc03g053110	SL3.0ch03	24278111	24280111	-	386	237	350	330	61.958	51.471	-10.4877	0.000779014	-0.304882	4.66789	0.483247	1
Solyc03g058340	SL3.0ch03	26139137	26141137	+	581	111	547	150	83.96	78.479	-5.48034	0.0250412	0.192521	3.74129	0.610767	1
Solyc03g058910	SL3.0ch03	28823337	28825337	+	994	358	267	531	73.521	33.459	-40.0621	3.11753e-72	-0.293625	-2.09797	0.871749	1
Solyc03g058920	SL3.0ch03	29068406	29070406	+	292	24	243	39	92.405	86.17	-6.23485	0.0391878	-3.22749	-3.65156	0.351477	1
Solyc03g058970	SL3.0ch03	29464350	29466350	-	730	277	651	320	72.493	67.044	-5.44827	0.0256879	-0.00596318	7.26506	0.982911	1
Solyc03g059080	SL3.0ch03	29809196	29811196	+	527	45	549	76	92.133	87.84	-4.29287	0.0395884	-1.91426	-3.87151	1	1
Solyc03g059435	SL3.0ch03	31928715	31930715	-	994	135	931	330	88.043	73.83	-14.2122	3.00573e-17	7.21903	-2.07436	0.000196535	0.0315232
Solyc03g061600	SL3.0ch03	32685167	32687167	+	223	229	227	326	49.336	41.049	-8.28746	0.0247962	0.266449	5.25271	0.334209	1
Solyc03g062930	SL3.0ch03	34721245	34723245	+	290	34	172	38	89.506	81.905	-7.60141	0.0347923	-0.291623	2.83688	0.462743	1
Solyc03g063070	SL3.0ch03	35359523	35361523	+	294	569	262	645	34.067	28.886	-5.18077	0.0485889	0	-3.91086	1	1
Solyc03g063290	SL3.0ch03	36181485	36183485	-	776	276	676	302	73.764	69.121	-4.6436	0.0480758	-0.126798	3.27046	0.749124	1
Solyc03g063370	SL3.0ch03	36742077	36744077	-	64	724	9	306	8.122	2.857	-5.26468	0.00450772	-1.52067	0.0335274	0.021033	0.686413
Solyc03g063550	SL3.0ch03	37089656	37091656	+	266	183	161	188	59.243	46.132	-13.111	0.00131799	-1.26436	-1.6417	0.306195	1
Solyc03g063600	SL3.0ch03	37404377	37406377	+	810	162	511	175	83.333	74.49	-8.84354	0.000100466	0.150571	8.32009	0.665422	1
Solyc03g065320	SL3.0ch03	43583307	43585307	-	140	20	114	36	87.5	76	-11.5	0.0305015	0	-3.86745	1	1
Solyc03g013060	SL3.0ch03	49083234	49085234	+	837	202	559	191	80.558	74.533	-6.0249	0.00908513	0	-3.91086	1	1
Solyc03g077910	SL3.0ch03	49953323	49955323	-	616	431	457	477	58.835	48.929	-9.90543	8.7046e-05	-0.701019	3.373	0.0546814	1
Solyc03g077950	SL3.0ch03	50061144	50063144	-	149	703	38	685	17.488	5.256	-12.2324	5.50456e-13	-0.0250435	1.17359	0.97771	1
Solyc03g077990	SL3.0ch03	50255705	50257705	-	346	170	214	243	67.054	46.827	-20.2271	4.61056e-09	0	-3.82867	1	1
Solyc03g078025	SL3.0ch03	50386844	50388844	+	96	4	16	94	96	14.545	-81.4545	7.11028e-35	0.253801	3.3003	0.450262	1
Solyc03g078090	SL3.0ch03	51472535	51474535	+	353	358	359	494	49.648	42.087	-7.56163	0.010421	-1.34094	-0.911407	0.381379	1
Solyc03g078170	SL3.0ch03	51575871	51577871	-	1137	75	1141	138	93.812	89.21	-4.60156	0.000260526	0	-3.91086	1	1
Solyc03g078175	SL3.0ch03	51580051	51582051	-	564	47	478	66	92.308	87.868	-4.44005	0.033245	0	-3.91086	1	1
Solyc03g078207	SL3.0ch03	51602956	51604956	-	652	139	477	142	82.427	77.06	-5.36753	0.0333165	0	-3.91086	1	1
Solyc03g078370	SL3.0ch03	52148742	52150742	+	27	141	15	243	16.071	5.814	-10.2575	0.00320826	-0.164851	4.15462	0.748269	1
Solyc03g078710	SL3.0ch03	52801452	52803452	+	451	175	401	262	72.045	60.483	-11.5621	9.5499e-05	0.540679	-2.96574	0.881183	1
Solyc03g078840	SL3.0ch03	53004549	53006549	+	1189	154	954	182	88.533	83.979	-4.55426	0.00466586	0	-3.91086	1	1
Solyc03g079850	SL3.0ch03	53097195	53099195	-	875	997	673	930	46.741	41.984	-4.75767	0.0154805	0.433969	4.48188	0.175905	1
Solyc03g079900	SL3.0ch03	53214605	53216605	+	1088	491	937	538	68.904	63.525	-5.37895	0.00628177	0	-3.91086	1	1
Solyc03g080075	SL3.0ch03	53387819	53389819	+	205	508	128	577	28.752	18.156	-10.5957	2.20135e-05	-1.64337	-2.02986	0.208133	1
Solyc03g080120	SL3.0ch03	53450566	53452566	+	1153	310	758	379	78.811	66.667	-12.144	1.05373e-10	0.128186	0.744526	0.905382	1
Solyc03g080160	SL3.0ch03	53481791	53483791	-	12	501	0	291	2.339	0	-2.33918	0.0164435	0.477587	7.45938	0.088088	1
Solyc03g081190	SL3.0ch03	53538896	53540896	-	147	93	142	203	61.25	41.159	-20.0906	2.04346e-05	-0.243628	0.410082	0.670002	1
Solyc03g081220	SL3.0ch03	53549117	53551117	+	296	480	252	689	38.144	26.78	-11.3643	5.78898e-06	0.0183269	5.24671	0.944129	1
Solyc03g082355	SL3.0ch03	53726704	53728704	-	429	238	293	242	64.318	54.766	-9.55149	0.00372912	0.773629	-1.23018	0.463161	1
Solyc03g082390	SL3.0ch03	53763460	53765460	+	2098	317	1698	508	86.874	76.972	-9.90181	7.19446e-17	-0.116465	1.08749	0.841006	1
Solyc03g082460	SL3.0ch03	53819758	53821758	-	177	378	167	482	31.892	25.732	-6.16	0.0486623	0	-3.91086	1	1
Solyc03g082650	SL3.0ch03	53988047	53990047	+	1182	313	1020	368	79.064	73.487	-5.57651	0.00206412	0	-3.91086	1	1
Solyc03g082760	SL3.0ch03	54067975	54069975	-	449	596	319	625	42.967	33.792	-9.17413	0.000182504	0	-3.91086	1	1
Solyc03g082950	SL3.0ch03	54239361	54241361	+	234	444	130	432	34.513	23.132	-11.3816	8.56344e-05	-0.537102	-3.31484	0.846192	1
Solyc03g082990	SL3.0ch03	54261722	54263722	+	347	147	340	225	70.243	60.177	-10.0659	0.00277782	0.290863	2.22724	0.606449	1
Solyc03g083200	SL3.0ch03	54469794	54471794	+	373	140	215	132	72.71	61.96	-10.7499	0.00408151	-0.281414	1.98346	0.504334	1
Solyc03g083310	SL3.0ch03	54566658	54568658	-	1597	416	997	377	79.334	72.562	-6.77246	4.40582e-05	0.0701861	4.74616	0.813012	1
Solyc03g083420	SL3.0ch03	54716522	54718522	+	153	777	70	637	16.452	9.901	-6.55062	0.000635611	0.198137	6.52342	0.4915	1
Solyc03g083430	SL3.0ch03	54734540	54736540	-	943	284	777	307	76.854	71.679	-5.17515	0.0149861	0.168761	6.86394	0.579689	1
Solyc03g083530	SL3.0ch03	54898113	54900113	+	973	304	779	391	76.194	66.581	-9.61301	1.695e-06	0.272934	9.28843	0.40683	1
Solyc03g083550	SL3.0ch03	54919187	54921187	-	282	620	166	562	31.264	22.802	-8.46166	0.000795041	-0.218386	1.20442	0.647702	1
Solyc03g083720	SL3.0ch03	55084325	55086325	-	54	675	26	712	7.407	3.523	-3.88437	0.00468229	-0.197075	-3.2473	1	1
Solyc03g083820	SL3.0ch03	55150956	55152956	-	191	569	126	584	25.132	17.746	-7.3851	0.00267782	0	-3.91086	1	1
Solyc03g083825	SL3.0ch03	55151017	55153017	+	191	551	124	564	25.741	18.023	-7.71798	0.00204713	0	-3.91086	1	1
Solyc03g083830	SL3.0ch03	55155605	55157605	-	459	395	387	427	53.747	47.543	-6.20408	0.0322147	0	-3.91086	1	1
Solyc03g091010	SL3.0ch03	55547952	55549952	+	294	134	286	192	68.692	59.833	-8.85895	0.0169921	0	-3.91086	1	1
Solyc03g093040	SL3.0ch03	55626126	55628126	+	1499	434	1066	524	77.548	67.044	-10.5038	9.14997e-11	0	-3.91086	1	1
Solyc03g093240	SL3.0ch03	55853890	55855890	+	136	775	71	650	14.929	9.847	-5.08122	0.00764757	-0.620258	4.2031	0.0642297	1
Solyc03g093270	SL3.0ch03	55879490	55881490	+	327	828	206	735	28.312	21.892	-6.42008	0.00361113	0	-3.91086	1	1
Solyc03g093290	SL3.0ch03	55894270	55896270	+	1076	426	931	504	71.638	64.878	-6.75977	0.000498615	0	-3.91086	1	1
Solyc03g093350	SL3.0ch03	56052102	56054102	-	94	255	65	289	26.934	18.362	-8.57252	0.0200321	0.475318	4.21455	0.19915	1
Solyc03g093460	SL3.0ch03	56177274	56179274	-	247	315	177	320	43.95	35.614	-8.3365	0.0199599	-1.03639	-0.640991	0.18077	1
Solyc03g093550	SL3.0ch03	56356445	56358445	-	1139	907	864	835	55.67	50.853	-4.81616	0.011271	0.309406	6.54262	0.431371	1
Solyc03g093710	SL3.0ch03	56777084	56779084	-	425	516	272	549	45.165	33.13	-12.0344	3.05313e-06	-0.554629	-3.45321	0.749793	1
Solyc03g093900	SL3.0ch03	57017373	57019373	-	1317	147	1598	247	89.959	86.612	-3.34655	0.0114734	0	-3.91086	1	1
Solyc03g095650	SL3.0ch03	58268741	58270741	-	328	650	176	532	33.538	24.859	-8.67908	0.00070659	0.152271	-0.976522	0.934167	1
Solyc03g096090	SL3.0ch03	59363974	59365974	+	157	374	95	332	29.567	22.248	-7.31861	0.0313074	-0.330343	2.65135	0.416795	1
Solyc03g096220	SL3.0ch03	59584471	59586471	+	495	273	546	482	64.453	53.113	-11.3403	1.53245e-05	0.309552	3.8793	0.465105	1
Solyc03g096720	SL3.0ch03	60491902	60493902	-	480	142	441	194	77.17	69.449	-7.7216	0.00785282	-3.61574	-3.72541	0.416361	1
Solyc03g096810	SL3.0ch03	60603760	60605760	-	735	509	647	556	59.084	53.782	-5.30139	0.0248878	0.196222	6.35271	0.443254	1
Solyc03g096840	SL3.0ch03	60646573	60648573	-	653	793	492	777	45.159	38.771	-6.38837	0.00341547	-0.229728	8.38513	0.545413	1
Solyc03g096850	SL3.0ch03	60663429	60665429	+	573	464	556	551	55.256	50.226	-5.02971	0.0497733	-0.818569	6.1826	0.0339076	0.861177
Solyc03g096870	SL3.0ch03	60675637	60677637	-	200	501	34	516	28.531	6.182	-22.3489	4.40833e-24	-1.75027	-0.451433	0.0954491	1
Solyc03g096935	SL3.0ch03	60752806	60754806	-	1373	383	1296	513	78.189	71.642	-6.54728	5.75691e-05	0.317896	4.52951	0.328355	1
Solyc03g097005	SL3.0ch03	60804360	60806360	-	91	542	43	466	14.376	8.448	-5.92805	0.00781681	1.80251	-3.56693	1	1
Solyc03g097400	SL3.0ch03	61162433	61164433	+	341	787	312	903	30.23	25.679	-4.55148	0.0364053	-0.266912	2.26148	0.572343	1
Solyc03g097590	SL3.0ch03	61361612	61363612	-	8	73	0	54	9.877	0	-9.87654	0.0492276	0	-3.91086	1	1
Solyc03g097585	SL3.0ch03	61388027	61390027	-	180	959	119	897	15.803	11.713	-4.09074	0.0206962	0	-3.91086	1	1
Solyc03g097620	SL3.0ch03	61388027	61390027	-	180	959	119	897	15.803	11.713	-4.09074	0.0206962	0	-3.91086	1	1
Solyc03g098090	SL3.0ch03	61873524	61875524	-	633	884	442	755	41.727	36.926	-4.80145	0.0301329	1.35549	-1.5411	0.271329	1
Solyc03g098170	SL3.0ch03	61942937	61944937	-	776	294	659	315	72.523	67.659	-4.86423	0.0422968	0.33311	5.58982	0.243602	1
Solyc03g098560	SL3.0ch03	62316867	62318867	+	421	285	369	328	59.632	52.941	-6.69055	0.0338168	-0.187201	-0.34688	0.895492	1
Solyc03g098700	SL3.0ch03	62415895	62417895	-	774	516	518	454	60	53.292	-6.70782	0.00568415	-1.82853	-3.65794	0.645872	1
Solyc03g098750	SL3.0ch03	62465229	62467229	-	80	785	44	856	9.249	4.889	-4.35967	0.00177569	0.513224	5.32084	0.204445	1
Solyc03g098760	SL3.0ch03	62473361	62475361	-	801	552	683	584	59.202	53.907	-5.29491	0.0191308	0	0.712571	1	1
Solyc03g020080	SL3.0ch03	62619518	62621518	+	990	78	851	145	92.697	85.442	-7.25486	1.42315e-06	-0.874444	-1.54553	0.354158	1
Solyc03g019940	SL3.0ch03	62747492	62749492	-	13	320	1	244	3.904	0.408	-3.49574	0.0170038	-0.175326	5.59959	0.517898	1
Solyc03g019870	SL3.0ch03	62785877	62787877	+	414	1323	246	1234	23.834	16.622	-7.21258	4.65638e-06	3.84985	-3.36138	0.257679	1
Solyc03g019860	SL3.0ch03	62790995	62792995	+	41	607	16	554	6.327	2.807	-3.52014	0.0129643	1.72134	-2.20874	0.233463	1
Solyc03g019800	SL3.0ch03	62825196	62827196	+	626	825	482	790	43.143	37.893	-5.24958	0.0167351	0.270598	4.05488	0.397246	1
Solyc03g019650	SL3.0ch03	62942213	62944213	+	57	598	32	588	8.702	5.161	-3.541	0.0377875	-0.551798	6.72372	0.101507	1
Solyc03g110840	SL3.0ch03	63065739	63067739	+	674	282	541	335	70.502	61.758	-8.7441	0.000529458	0	-3.91086	1	1
Solyc03g111090	SL3.0ch03	63237887	63239887	-	238	690	208	928	25.647	18.31	-7.33669	0.000407746	0.370202	-1.19338	0.674695	1
Solyc03g111260	SL3.0ch03	63350601	63352601	+	405	202	360	249	66.722	59.113	-7.60828	0.0187256	-0.504355	5.53702	0.125288	1
Solyc03g111370	SL3.0ch03	63448648	63450648	-	49	482	13	414	9.228	3.044	-6.18338	0.00056324	0.176372	5.07378	0.54424	1
Solyc03g111500	SL3.0ch03	63593639	63595639	-	265	262	173	250	50.285	40.898	-9.38628	0.0128842	0.683836	2.12077	0.175841	1
Solyc03g111593	SL3.0ch03	63721144	63723144	-	18	248	10	417	6.767	2.342	-4.425	0.0159396	-0.0675864	2.54078	0.877976	1
Solyc03g111640	SL3.0ch03	63759252	63761252	-	1183	209	560	237	84.986	70.263	-14.7221	2.41364e-14	0.416524	7.439	0.19294	1
Solyc03g111790	SL3.0ch03	63905109	63907109	+	12	148	4	193	7.5	2.03	-5.46954	0.0440007	0.122618	-0.672726	0.896503	1
Solyc03g112040	SL3.0ch03	64064347	64066347	+	766	443	615	463	63.358	57.05	-6.30805	0.00830401	4.61892	3.02846	0.0239055	0.731475
Solyc03g112140	SL3.0ch03	64119151	64121151	+	330	522	250	593	38.732	29.656	-9.0764	0.000563484	-0.269011	3.50607	0.414989	1
Solyc03g112190	SL3.0ch03	64161112	64163112	+	454	165	97	133	73.344	42.174	-31.1702	3.62471e-15	0.354322	1.97035	0.46516	1
Solyc03g112270	SL3.0ch03	64211685	64213685	-	38	566	12	430	6.291	2.715	-3.57646	0.022261	0.362407	6.44256	0.25073	1
Solyc03g112350	SL3.0ch03	64256762	64258762	+	244	343	156	315	41.567	33.121	-8.44627	0.0155337	0.764919	3.33402	0.146073	1
Solyc03g112460	SL3.0ch03	64349425	64351425	-	1162	375	968	445	75.602	68.507	-7.0951	0.000132036	-0.777071	-1.86577	0.621324	1
Solyc03g112800	SL3.0ch03	64607525	64609525	+	44	236	1	82	15.714	1.205	-14.5095	0.000537194	0	-3.87283	1	1
Solyc03g112995	SL3.0ch03	64781877	64783877	-	761	547	581	562	58.18	50.831	-7.34928	0.00145346	0	-3.91086	1	1
Solyc03g113010	SL3.0ch03	64799830	64801830	-	634	977	708	1283	39.354	35.56	-3.79442	0.0470699	0.242922	5.61255	0.445098	1
Solyc03g113020	SL3.0ch03	64803456	64805456	+	598	514	507	594	53.777	46.049	-7.72793	0.00148248	-0.0622746	6.41482	0.842198	1
Solyc03g113060	SL3.0ch03	64844286	64846286	-	286	399	214	431	41.752	33.178	-8.57353	0.00570549	-0.54229	5.02279	0.0808242	1
Solyc03g113100	SL3.0ch03	64868216	64870216	-	1178	475	911	511	71.264	64.065	-7.19967	0.000162174	0.143029	8.19052	0.631587	1
Solyc03g113240	SL3.0ch03	64924622	64926622	+	148	247	96	237	37.468	28.829	-8.63953	0.0365949	-0.575041	4.89591	0.163155	1
Solyc03g113360	SL3.0ch03	64994772	64996772	-	79	412	47	389	16.09	10.78	-5.3098	0.0484682	0	-3.91086	1	1
Solyc03g113390	SL3.0ch03	65022153	65024153	+	171	540	37	444	24.051	7.692	-16.3583	9.91692e-13	0.743814	6.92844	0.047328	0.988801
Solyc03g113670	SL3.0ch03	65224434	65226434	+	1300	430	1216	554	75.145	68.701	-6.44394	0.000169865	0	-3.4546	1	1
Solyc03g113970	SL3.0ch03	65508145	65510145	+	386	758	279	699	33.741	28.528	-5.21365	0.0267807	0.00773688	0.459695	1	1
Solyc03g113990	SL3.0ch03	65528081	65530081	-	792	417	660	428	65.509	60.662	-4.84692	0.0414085	-0.398285	3.69858	0.396768	1
Solyc03g114020	SL3.0ch03	65544215	65546215	-	52	856	21	656	5.727	3.102	-2.62495	0.0373882	0.189008	4.36586	0.562723	1
Solyc03g114140	SL3.0ch03	65642409	65644409	-	775	342	598	337	69.382	63.957	-5.42505	0.0261716	0.203296	6.01008	0.496319	1
Solyc03g114270	SL3.0ch03	65776492	65778492	+	256	450	171	403	36.261	29.791	-6.46968	0.0412319	0	-3.59716	1	1
Solyc03g114750	SL3.0ch03	66141613	66143613	-	170	300	176	520	36.17	25.287	-10.8829	0.0004994	0.381555	5.30262	0.573649	1
Solyc03g114770	SL3.0ch03	66148466	66150466	-	901	621	678	567	59.198	54.458	-4.74059	0.0342536	-1.91147	-3.83452	1	1
Solyc03g114940	SL3.0ch03	66282922	66284922	-	888	1763	683	1584	33.497	30.128	-3.36887	0.0310613	-3.61682	-3.75958	0.440481	1
Solyc03g114970	SL3.0ch03	66320228	66322228	-	500	390	399	555	56.18	41.824	-14.3559	1.25475e-08	0.228321	6.74945	0.596002	1
Solyc03g114980	SL3.0ch03	66319826	66321826	+	499	393	396	559	55.942	41.466	-14.4757	9.58451e-09	0.0276039	4.45523	0.929713	1
Solyc03g115050	SL3.0ch03	66372359	66374359	-	436	316	361	434	57.979	45.409	-12.5699	7.72638e-06	-0.254977	2.72624	0.770473	1
Solyc03g115250	SL3.0ch03	66526054	66528054	+	196	302	26	326	39.357	7.386	-31.9711	2.30639e-26	0.114377	5.14605	0.735029	1
Solyc03g115440	SL3.0ch03	66628510	66630510	+	600	600	444	579	50	43.402	-6.59824	0.0076701	0.304798	4.26064	0.379408	1
Solyc03g115690	SL3.0ch03	66815202	66817202	-	45	24	24	48	65.217	33.333	-31.8841	0.00103872	-0.470649	0.275471	0.628304	1
Solyc03g115730	SL3.0ch03	66845004	66847004	+	926	494	735	506	65.211	59.226	-5.98484	0.0057866	-0.167045	3.16021	0.681938	1
Solyc03g115810	SL3.0ch03	66880542	66882542	+	1102	165	1005	209	86.977	82.784	-4.19293	0.0132951	0.145047	4.60136	0.690855	1
Solyc03g115843	SL3.0ch03	66912431	66914431	-	20	1201	3	840	1.638	0.356	-1.28213	0.0160327	-1.00692	0.148628	0.112406	1
Solyc03g115870	SL3.0ch03	66951811	66953811	+	34	292	6	210	10.429	2.778	-7.65167	0.00285013	-1.75565	4.35115	0.000103836	0.019445
Solyc03g116010	SL3.0ch03	67032454	67034454	-	20	154	5	139	11.494	3.472	-8.02203	0.0287819	0	-3.91086	1	1
Solyc03g116020	SL3.0ch03	67035602	67037602	-	300	63	259	84	82.645	75.51	-7.13442	0.0477878	-0.0414885	5.83533	0.899796	1
Solyc03g116860	SL3.0ch03	67604681	67606681	-	316	194	163	180	61.961	47.522	-14.4389	0.000217399	0	-3.31757	1	1
Solyc03g116975	SL3.0ch03	67735083	67737083	-	328	547	50	185	37.486	21.277	-16.2091	1.82797e-05	3.49844	-3.72725	0.268257	1
Solyc03g117010	SL3.0ch03	67767402	67769402	-	1450	409	752	348	77.999	68.364	-9.63529	1.49709e-07	-0.289343	4.67167	0.318857	1
Solyc03g117020	SL3.0ch03	67769911	67771911	+	608	592	249	428	50.667	36.78	-13.8868	9.85419e-08	0.388578	6.22148	0.138977	1
Solyc03g117050	SL3.0ch03	67797259	67799259	+	133	237	99	323	35.946	23.46	-12.4862	0.000694285	-0.194633	-0.857109	0.89542	1
Solyc03g117060	SL3.0ch03	67809702	67811702	-	810	585	521	658	58.065	44.19	-13.8745	5.51323e-11	0.000960755	6.11508	0.997677	1
Solyc03g117070	SL3.0ch03	67816940	67818940	+	508	938	302	710	35.131	29.842	-5.2895	0.0180136	-1.69159	-2.01911	0.348721	1
Solyc03g117200	SL3.0ch03	67886276	67888276	+	392	189	58	151	67.47	27.751	-39.7187	1.66804e-21	-0.207379	4.36355	0.498535	1
Solyc03g117220	SL3.0ch03	67904217	67906217	-	1254	351	399	254	78.131	61.103	-17.0282	2.20834e-14	0	-3.82946	1	1
Solyc03g117430	SL3.0ch03	68081875	68083875	+	1045	354	806	365	74.696	68.83	-5.86615	0.00437007	-0.518821	7.22872	0.169987	1
Solyc03g117470	SL3.0ch03	68105545	68107545	-	1284	185	114	32	87.406	78.082	-9.32421	0.0105538	4.28792	2.11599	1.3469e-12	1.55406e-09
Solyc03g117600	SL3.0ch03	68197926	68199926	+	321	954	127	618	25.176	17.047	-8.12949	0.000132577	-0.428913	2.96895	0.384441	1
Solyc03g117640	SL3.0ch03	68215185	68217185	-	857	810	330	445	51.41	42.581	-8.82907	0.000323473	0.325491	2.00228	0.570603	1
Solyc03g117670	SL3.0ch03	68232190	68234190	+	48	417	0	83	10.323	0	-10.3226	0.00213594	-0.270416	3.0027	0.524631	1
Solyc03g117710	SL3.0ch03	68253906	68255906	-	1136	905	840	795	55.659	51.376	-4.28284	0.0278472	-1.91008	-3.14009	1	1
Solyc03g117790	SL3.0ch03	68305207	68307207	-	1103	318	1158	413	77.621	73.711	-3.91038	0.0342536	-2.33662	-3.04087	0.20517	1
Solyc03g117940	SL3.0ch03	68402073	68404073	+	322	478	233	499	40.25	31.831	-8.4194	0.00287582	-0.0550539	6.23274	0.853705	1
Solyc03g118010	SL3.0ch03	68481810	68483810	-	54	753	19	543	6.691	3.381	-3.31067	0.0203635	0.206119	6.12666	0.51014	1
Solyc03g118030	SL3.0ch03	68508190	68510190	-	38	117	38	234	24.516	13.971	-10.5455	0.0231665	0.124988	5.93008	0.618919	1
Solyc03g118080	SL3.0ch03	68541268	68543268	-	478	933	416	1031	33.877	28.749	-5.12755	0.0107959	0	-3.91086	1	1
Solyc03g118450	SL3.0ch03	68809196	68811196	-	201	417	95	490	32.524	16.239	-16.285	8.65404e-10	-0.410901	2.54199	0.697413	1
Solyc03g118455	SL3.0ch03	68808506	68810506	+	200	419	95	440	32.31	17.757	-14.5532	2.27825e-07	-1.90337	-3.76085	1	1
Solyc03g118470	SL3.0ch03	68812950	68814950	+	490	393	382	386	55.493	49.74	-5.75306	0.0470932	-0.32159	7.63966	0.571396	1
Solyc03g118530	SL3.0ch03	68903334	68905334	-	67	329	30	263	16.919	10.239	-6.68028	0.0364089	0.105372	5.63699	0.740692	1
Solyc03g118630	SL3.0ch03	68964890	68966890	-	696	591	422	503	54.079	45.622	-8.45763	0.000512124	0.0828617	2.44185	0.867312	1
Solyc03g118960	SL3.0ch03	69195029	69197029	-	101	100	126	211	50.249	37.389	-12.86	0.0126228	1.1102	-1.78992	0.315516	1
Solyc03g119060	SL3.0ch03	69254601	69256601	+	219	654	152	641	25.086	19.168	-5.91819	0.0125369	-0.487093	6.23284	0.131913	1
Solyc03g119250	SL3.0ch03	69377163	69379163	-	124	530	77	498	18.96	13.391	-5.56894	0.0239875	-0.031728	7.81306	0.955474	1
Solyc03g119380	SL3.0ch03	69494199	69496199	-	725	772	460	727	48.43	38.753	-9.67703	5.50574e-06	-0.0277159	5.52875	0.919883	1
Solyc03g119590	SL3.0ch03	69637045	69639045	+	956	266	868	306	78.232	73.935	-4.29714	0.0362998	1.55982	2.57567	0.1602	1
Solyc03g120130	SL3.0ch03	70096197	70098197	+	14	216	0	90	6.087	0	-6.08696	0.0334296	0.191179	3.92549	0.550702	1
Solyc03g120340	SL3.0ch03	70251175	70253175	-	1741	337	1333	333	83.782	80.012	-3.77048	0.0103377	-0.0742018	3.97851	0.840768	1
Solyc03g120410	SL3.0ch03	70299199	70301199	+	914	290	761	369	75.914	67.345	-8.56849	4.15288e-05	-0.14113	2.39488	0.772861	1
Solyc03g120420	SL3.0ch03	70304126	70306126	+	35	123	32	249	22.152	11.388	-10.764	0.0116193	1.0227	0.555925	0.210695	1
Solyc03g120640	SL3.0ch03	70459507	70461507	+	261	502	221	616	34.207	26.404	-7.80325	0.00308888	-0.766414	6.65953	0.0276651	0.784713
Solyc03g120700	SL3.0ch03	70478466	70480466	+	982	344	854	421	74.057	66.98	-7.07692	0.000515392	-0.0640581	5.61808	0.863638	1
Solyc03g120885	SL3.0ch03	70598505	70600505	-	312	980	254	1009	24.149	20.111	-4.03776	0.0374106	0	-3.91086	1	1
Solyc03g120890	SL3.0ch03	70608822	70610822	-	308	1272	50	1290	19.494	3.731	-15.7623	4.15867e-40	0.184303	2.43611	0.726541	1
Solyc03g120910	SL3.0ch03	70624721	70626721	+	1529	523	1388	642	74.513	68.374	-6.13829	0.000106751	-0.214168	5.34594	0.500854	1
Solyc03g121020	SL3.0ch03	70731150	70733150	+	1379	471	1314	584	74.541	69.231	-5.30977	0.00156741	1.09949	1.37793	0.0342261	0.862719
Solyc03g121210	SL3.0ch03	70863166	70865166	-	655	423	426	345	60.761	55.253	-5.50775	0.0448484	0.140364	3.7885	0.68053	1
Solyc03g121230	SL3.0ch03	70863098	70865098	+	659	510	429	424	56.373	50.293	-6.07989	0.0218417	0	-3.87049	1	1
Solyc03g121420	SL3.0ch03	71017701	71019701	+	564	484	409	478	53.817	46.11	-7.70631	0.00316062	-3.27629	0.527503	0.00342985	0.248532
Solyc03g121740	SL3.0ch03	71296589	71298589	-	477	728	345	697	39.585	33.109	-6.47566	0.00590362	0	-3.91086	1	1
Solyc03g121745	SL3.0ch03	71297738	71299738	-	304	810	196	779	27.289	20.103	-7.18648	0.000766274	0	-3.91086	1	1
Solyc03g121830	SL3.0ch03	71355782	71357782	+	219	136	198	187	61.69	51.429	-10.2616	0.0179443	0.100163	5.8137	0.711174	1
Solyc03g121930	SL3.0ch03	71422478	71424478	-	312	116	266	174	72.897	60.455	-12.4427	0.000585264	0.325376	1.27091	0.599059	1
Solyc03g121940	SL3.0ch03	71427620	71429620	-	19	459	3	400	3.975	0.744	-3.23048	0.00704816	0.0231615	2.4467	0.974612	1
Solyc03g121960	SL3.0ch03	71446985	71448985	-	144	498	98	488	22.43	16.724	-5.70636	0.0363183	0.339558	6.27546	0.236164	1
Solyc03g123590	SL3.0ch03	71899879	71901879	+	94	1042	39	745	8.275	4.974	-3.30016	0.0176744	-1.61149	0.610195	0.062022	1
Solyc03g123800	SL3.0ch03	72029869	72031869	-	828	415	525	336	66.613	60.976	-5.63742	0.0233881	-0.386382	6.62076	0.188071	1
Solyc03g123840	SL3.0ch03	72044965	72046965	+	58	566	12	339	9.295	3.419	-5.87607	0.00203448	0.0965842	6.06847	0.726333	1
Solyc04g005280	SL3.0ch04	202902	204902	+	901	409	841	520	68.779	61.793	-6.98583	0.000844448	0.319775	5.05246	0.262478	1
Solyc04g005380	SL3.0ch04	268776	270776	+	343	268	223	233	56.137	48.904	-7.23397	0.0497474	0.683958	1.56754	0.338073	1
Solyc04g005430	SL3.0ch04	303465	305465	-	657	291	568	352	69.304	61.739	-7.56467	0.00283585	0.328756	4.37924	0.34984	1
Solyc04g005570	SL3.0ch04	382941	384941	-	1890	560	1620	716	77.143	69.349	-7.79354	1.91101e-08	-0.208282	0.28652	0.759508	1
Solyc04g005690	SL3.0ch04	450343	452343	+	384	676	273	651	36.226	29.545	-6.68096	0.00602923	0.220922	5.76366	0.42069	1
Solyc04g005850	SL3.0ch04	540176	542176	+	314	230	224	232	57.721	49.123	-8.59778	0.0213508	0	-3.91086	1	1
Solyc04g006983	SL3.0ch04	695261	697261	+	340	190	266	202	64.151	56.838	-7.31334	0.0456653	-3.61681	-3.75958	0.440388	1
Solyc04g007000	SL3.0ch04	726939	728939	+	1043	689	870	688	60.219	55.841	-4.37858	0.031228	-1.20899	2.64586	0.22716	1
Solyc04g007020	SL3.0ch04	741769	743769	-	229	80	49	174	74.11	21.973	-52.1369	1.01071e-31	0.283115	7.57469	0.31919	1
Solyc04g007230	SL3.0ch04	931569	933569	-	360	143	275	163	71.571	62.785	-8.78519	0.0135863	-0.014356	5.20285	0.959145	1
Solyc04g007240	SL3.0ch04	940612	942612	+	920	516	874	588	64.067	59.781	-4.28573	0.0424922	0.278118	-0.015128	0.789412	1
Solyc04g007330	SL3.0ch04	1046598	1048598	-	217	619	152	606	25.957	20.053	-5.90417	0.0183584	0.301704	2.31166	0.542564	1
Solyc04g007480	SL3.0ch04	1155483	1157483	+	638	281	480	270	69.423	64	-5.42329	0.0488939	0.207924	-1.67999	0.925593	1
Solyc04g008100	SL3.0ch04	1759176	1761176	-	113	246	99	321	31.476	23.571	-7.90489	0.0379696	0.513597	5.96419	0.507607	1
Solyc04g008150	SL3.0ch04	1834179	1836179	-	954	675	747	756	58.564	49.701	-8.86294	7.09126e-06	0	-3.87249	1	1
Solyc04g008310	SL3.0ch04	1987685	1989685	-	808	529	644	541	60.434	54.346	-6.08782	0.00772059	0.135244	5.71127	0.649761	1
Solyc04g008410	SL3.0ch04	2036206	2038206	-	598	297	626	388	66.816	61.736	-5.07994	0.049763	-0.0221381	1.20884	0.978503	1
Solyc04g008520	SL3.0ch04	2150347	2152347	-	1302	254	1022	304	83.676	77.074	-6.60219	6.57987e-05	-0.476017	6.38019	0.064329	1
Solyc04g008510	SL3.0ch04	2131690	2133690	+	746	117	711	280	86.443	71.746	-14.6969	2.38834e-13	0.173454	5.43064	0.525988	1
Solyc04g008530	SL3.0ch04	2152258	2154258	+	940	538	722	564	63.599	56.143	-7.45638	0.000425995	0	-3.91086	1	1
Solyc04g008540	SL3.0ch04	2165189	2167189	-	245	291	156	397	45.709	28.21	-17.4992	3.5452e-08	0.292648	5.31126	0.288616	1
Solyc04g008610	SL3.0ch04	2208516	2210516	+	142	88	143	167	61.739	46.129	-15.6101	0.00169907	0.424739	4.56474	0.314851	1
Solyc04g008630	SL3.0ch04	2251105	2253105	-	252	142	171	157	63.959	52.134	-11.8252	0.00551241	0.278142	4.67171	0.367977	1
Solyc04g008640	SL3.0ch04	2251598	2253598	+	139	133	80	143	51.103	35.874	-15.2285	0.00324872	0.0172745	5.68103	0.951198	1
Solyc04g008660	SL3.0ch04	2287155	2289155	+	547	42	430	84	92.869	83.658	-9.21168	1.5466e-05	0.485351	2.86168	0.357413	1
Solyc04g008820	SL3.0ch04	2433403	2435403	+	92	229	70	313	28.66	18.277	-10.3837	0.0047668	-0.114301	3.14495	0.886178	1
Solyc04g008950	SL3.0ch04	2551840	2553840	+	68	457	6	152	12.952	3.797	-9.15491	0.00291683	-0.432403	1.67536	0.482226	1
Solyc04g009110	SL3.0ch04	2635222	2637222	+	871	246	791	318	77.977	71.326	-6.6512	0.00152731	2.75444	-3.13396	0.199835	1
Solyc04g009220	SL3.0ch04	2708338	2710338	-	179	339	154	619	34.556	19.922	-14.6336	9.569e-08	0.54563	1.05844	0.324761	1
Solyc04g009310	SL3.0ch04	2758833	2760833	+	1196	471	948	501	71.746	65.424	-6.32122	0.000897234	-0.0587148	4.22895	0.858478	1
Solyc04g009435	SL3.0ch04	2852902	2854902	+	900	704	675	686	56.11	49.596	-6.51384	0.00207771	3.05649	-1.69155	0.0358779	0.883195
Solyc04g009465	SL3.0ch04	2864547	2866547	+	787	460	569	471	63.111	54.712	-8.39993	0.000307132	0.267508	-1.9635	0.91181	1
Solyc04g009580	SL3.0ch04	2973791	2975791	+	312	479	175	539	39.444	24.51	-14.9339	1.01504e-08	-0.142028	4.63533	0.660414	1
Solyc04g009660	SL3.0ch04	3032096	3034096	-	199	416	122	395	32.358	23.598	-8.76004	0.00466586	0.583923	0.578737	0.439128	1
Solyc04g009790	SL3.0ch04	3094277	3096277	-	304	372	180	392	44.97	31.469	-13.5019	1.17179e-05	0.599125	-1.49743	0.582462	1
Solyc04g009840	SL3.0ch04	3162060	3164060	+	467	469	465	600	49.893	43.662	-6.23119	0.0164057	-0.513219	2.03199	0.412096	1
Solyc04g010030	SL3.0ch04	3344248	3346248	-	138	152	110	188	47.586	36.913	-10.6735	0.0262932	1.21221	-0.219997	0.207001	1
Solyc04g010270	SL3.0ch04	3588660	3590660	+	409	404	389	512	50.308	43.174	-7.13325	0.0118159	0	-3.91086	1	1
Solyc04g011540	SL3.0ch04	3969962	3971962	+	1348	401	1321	495	77.073	72.742	-4.33032	0.0100143	2.36947	3.88939	7.54117e-05	0.0155019
Solyc04g011580	SL3.0ch04	4005264	4007264	-	552	609	398	545	47.545	42.206	-5.33949	0.0380543	0.150526	5.45034	0.610687	1
Solyc04g011600	SL3.0ch04	4026643	4028643	+	485	375	369	369	56.395	50	-6.39535	0.0310613	0	-3.91086	1	1
Solyc04g011800	SL3.0ch04	4233671	4235671	-	183	301	142	338	37.81	29.583	-8.22658	0.0222154	0	-3.91086	1	1
Solyc04g011840	SL3.0ch04	4253918	4255918	+	77	121	40	138	38.889	22.472	-16.417	0.0033184	0	-3.91086	1	1
Solyc04g012140	SL3.0ch04	4439009	4441009	-	59	203	47	338	22.519	12.208	-10.3113	0.00316487	0	-3.91086	1	1
Solyc04g014410	SL3.0ch04	4656878	4658878	-	136	101	111	202	57.384	35.463	-21.9207	3.4316e-06	0	-3.91086	1	1
Solyc04g014520	SL3.0ch04	4793239	4795239	+	428	641	268	518	40.037	34.097	-5.94073	0.0272439	-3.66701	-3.75752	0.44114	1
Solyc04g014540	SL3.0ch04	4810327	4812327	+	424	578	304	524	42.315	36.715	-5.60039	0.040059	0.203875	4.67169	0.459702	1
Solyc04g014610	SL3.0ch04	4878542	4880542	-	839	817	748	894	50.664	45.554	-5.11005	0.0113056	0.0274499	1.76254	0.968837	1
Solyc04g014690	SL3.0ch04	4948290	4950290	+	87	37	95	143	70.161	39.916	-30.2453	5.84978e-07	-2.15165	-3.67247	0.584903	1
Solyc04g014720	SL3.0ch04	4981077	4983077	+	610	157	596	231	79.531	72.068	-7.46292	0.00251942	-0.0955962	8.51546	0.754008	1
Solyc04g014775	SL3.0ch04	5025778	5027778	+	702	383	541	391	64.7	58.047	-6.65325	0.00854372	0	-3.91086	1	1
Solyc04g014885	SL3.0ch04	5138338	5140338	-	606	635	560	744	48.832	42.945	-5.8868	0.010782	-0.409179	-3.23411	0.889935	1
Solyc04g014997	SL3.0ch04	5208200	5210200	-	1445	674	1099	722	68.193	60.351	-7.84109	3.38352e-06	1.32055	-3.2165	0.720876	1
Solyc04g015000	SL3.0ch04	5213149	5215149	-	385	583	175	558	39.773	23.874	-15.8982	8.4868e-11	0	-3.86962	1	1
Solyc04g015090	SL3.0ch04	5272272	5274272	-	954	436	803	470	68.633	63.079	-5.55375	0.00958422	0	-3.91086	1	1
Solyc04g015450	SL3.0ch04	5659147	5661147	-	1958	139	1634	158	93.371	91.183	-2.18845	0.0290955	-0.167905	5.59297	0.584468	1
Solyc04g015500	SL3.0ch04	5713811	5715811	+	389	62	299	76	86.253	79.733	-6.51944	0.0367016	0.141766	3.96396	0.706867	1
Solyc04g015560	SL3.0ch04	5816406	5818406	+	758	1307	632	1299	36.707	32.729	-3.97787	0.0240361	-0.306733	6.04063	0.339877	1
Solyc04g015585	SL3.0ch04	5886066	5888066	+	7	109	0	111	6.034	0	-6.03448	0.0360278	0.115271	6.307	0.793626	1
Solyc04g015810	SL3.0ch04	6106918	6108918	-	416	935	300	871	30.792	25.619	-5.17288	0.014409	0	-3.91086	1	1
Solyc04g015820	SL3.0ch04	6116043	6118043	-	696	436	354	458	61.484	43.596	-17.888	2.42352e-13	0	-3.73335	1	1
Solyc04g016040	SL3.0ch04	6706555	6708555	+	310	423	192	431	42.292	30.819	-11.4733	0.000100503	1.90128	-3.87171	1	1
Solyc04g016090	SL3.0ch04	6808992	6810992	-	580	199	479	223	74.454	68.234	-6.22081	0.0257984	0	-3.91086	1	1
Solyc04g016150	SL3.0ch04	6893419	6895419	-	192	179	4	169	51.752	2.312	-49.4399	9.93178e-34	2.77306	-3.83179	0.672991	1
Solyc04g016240	SL3.0ch04	7043257	7045257	-	1199	405	1243	511	74.751	70.867	-3.88403	0.030744	-0.105996	5.87948	0.721753	1
Solyc04g016250	SL3.0ch04	7043239	7045239	+	1199	405	1243	511	74.751	70.867	-3.88403	0.030744	-0.134608	-0.420569	0.901821	1
Solyc04g016360	SL3.0ch04	7156709	7158709	+	1508	247	1218	283	85.926	81.146	-4.78002	0.00124037	0.099851	7.41678	0.725342	1
Solyc04g017620	SL3.0ch04	7431778	7433778	+	966	360	681	652	72.851	51.088	-21.7629	3.55949e-29	0.0281914	4.35266	0.930401	1
Solyc04g040180	SL3.0ch04	11957992	11959992	+	543	533	415	587	50.465	41.417	-9.04752	0.000265665	1.23398	7.87727	0.0197608	0.66869
Solyc04g040000	SL3.0ch04	12310880	12312880	+	531	348	468	472	60.41	49.787	-10.6223	4.76822e-05	-0.264528	2.02357	0.593716	1
Solyc04g026350	SL3.0ch04	16859900	16861900	-	562	97	470	118	85.281	79.932	-5.34876	0.0338086	0.202961	7.21886	0.454141	1
Solyc04g026020	SL3.0ch04	19750215	19752215	-	185	497	128	507	27.126	20.157	-6.96862	0.0115667	-1.23344	1.58812	0.116489	1
Solyc04g025870	SL3.0ch04	20705057	20707057	+	831	97	905	149	89.547	85.863	-3.68404	0.035156	-0.0738217	5.41558	0.790682	1
Solyc04g025850	SL3.0ch04	20754600	20756600	-	260	175	168	207	59.77	44.8	-14.9701	0.000156055	2.7046	-3.83362	0.671435	1
Solyc04g025610	SL3.0ch04	21646107	21648107	-	609	221	570	266	73.373	68.182	-5.19168	0.047747	0.436841	1.12829	0.532048	1
Solyc04g025585	SL3.0ch04	21712937	21714937	+	555	69	414	79	88.942	83.976	-4.96665	0.040059	0	-3.91086	1	1
Solyc04g024990	SL3.0ch04	26729160	26731160	-	308	239	212	322	56.307	39.7	-16.6068	7.05023e-07	0	-3.91086	1	1
Solyc04g024650	SL3.0ch04	29725123	29727123	+	1149	165	982	274	87.443	78.185	-9.25821	8.92212e-09	0	-3.91086	1	1
Solyc04g045650	SL3.0ch04	35235822	35237822	+	655	243	582	298	72.94	66.136	-6.8035	0.00718882	-0.185982	4.39665	0.51588	1
Solyc04g047727	SL3.0ch04	35896557	35898557	+	19	431	0	165	4.222	0	-4.22222	0.0106758	0	-3.91086	1	1
Solyc04g047820	SL3.0ch04	37750894	37752894	+	69	528	30	511	11.558	5.545	-6.0125	0.00155217	0	-3.91086	1	1
Solyc04g049380	SL3.0ch04	41704719	41706719	+	579	36	512	54	94.146	90.459	-3.68698	0.0480417	-0.417591	3.18547	0.342776	1
Solyc04g049400	SL3.0ch04	41768085	41770085	-	551	400	313	470	57.939	39.974	-17.9646	2.7089e-12	0	-3.91086	1	1
Solyc04g050260	SL3.0ch04	46290087	46292087	+	335	314	229	349	51.618	39.619	-11.9985	0.000186283	0	-3.91086	1	1
Solyc04g050270	SL3.0ch04	46463616	46465616	-	401	635	338	669	38.707	33.565	-5.14152	0.0404646	0.248536	4.34759	0.447444	1
Solyc04g050360	SL3.0ch04	46795809	46797809	-	642	146	532	169	81.472	75.892	-5.5805	0.0251282	0.183961	-2.83291	0.945764	1
Solyc04g050690	SL3.0ch04	47963336	47965336	-	467	319	371	364	59.415	50.476	-8.93857	0.00244808	-1.87827	-3.37362	0.486809	1
Solyc04g050700	SL3.0ch04	47962401	47964401	+	529	134	474	220	79.789	68.3	-11.4891	1.62613e-05	0	-3.91086	1	1
Solyc04g050730	SL3.0ch04	47998673	48000673	-	224	919	123	761	19.598	13.914	-5.68352	0.00356526	-4.67882	0.243737	0.0152471	0.595657
Solyc04g050895	SL3.0ch04	48810999	48812999	+	339	405	286	483	45.565	37.191	-8.37336	0.00408149	0	-3.91086	1	1
Solyc04g051240	SL3.0ch04	50104249	50106249	-	709	563	541	555	55.739	49.361	-6.37768	0.00717065	0.409468	0.697588	0.478031	1
Solyc04g051287	SL3.0ch04	50229880	50231880	+	223	49	319	124	81.985	72.009	-9.97626	0.00995754	-1.17357	-2.30444	0.468054	1
Solyc04g051320	SL3.0ch04	50258493	50260493	+	143	67	58	50	68.095	53.704	-14.3915	0.0354224	0	-3.91086	1	1
Solyc04g051370	SL3.0ch04	50385824	50387824	-	982	125	740	129	88.708	85.155	-3.55287	0.0488168	0.17151	7.4278	0.504112	1
Solyc04g051460	SL3.0ch04	50506540	50508540	+	470	988	354	1097	32.236	24.397	-7.83897	2.34471e-05	-0.134316	0.106923	0.894831	1
Solyc04g051470	SL3.0ch04	50519491	50521491	-	378	497	337	584	43.2	36.591	-6.60934	0.014055	-0.262828	2.97028	0.602487	1
Solyc04g051650	SL3.0ch04	50880802	50882802	+	119	141	60	163	45.769	26.906	-18.8634	0.000141907	0.213866	0.488141	0.800056	1
Solyc04g051700	SL3.0ch04	50957262	50959262	+	1755	286	1768	376	85.987	82.463	-3.52457	0.00715412	0.0506001	4.33779	0.871845	1
Solyc04g053030	SL3.0ch04	51246397	51248397	+	12	297	1	237	3.883	0.42	-3.46333	0.0243362	2.43259	-3.62548	0.224372	1
Solyc04g053040	SL3.0ch04	51276230	51278230	+	64	754	34	671	7.824	4.823	-3.00127	0.0481261	-2.70118	1.26481	0.542689	1
Solyc04g053098	SL3.0ch04	51536252	51538252	+	466	106	409	166	81.469	71.13	-10.3381	0.000260526	0	-3.86778	1	1
Solyc04g053120	SL3.0ch04	51659834	51661834	-	772	769	650	814	50.097	44.399	-5.69843	0.00692561	-0.956319	5.98056	0.00298919	0.228945
Solyc04g054270	SL3.0ch04	52199858	52201858	+	259	811	189	796	24.206	19.188	-5.01779	0.018804	0.109479	2.08054	0.822444	1
Solyc04g054430	SL3.0ch04	52442352	52444352	-	223	207	139	188	51.86	42.508	-9.35282	0.0322612	-0.53653	5.88302	0.175638	1
Solyc04g054770	SL3.0ch04	53169046	53171046	+	411	124	399	187	76.822	68.089	-8.73369	0.00515451	-0.60635	0.0298774	0.281977	1
Solyc04g054820	SL3.0ch04	53227671	53229671	+	824	272	652	334	75.182	66.126	-9.05672	5.41192e-05	0.361424	3.99025	0.436719	1
Solyc04g054850	SL3.0ch04	53254940	53256940	+	914	482	679	489	65.473	58.134	-7.33922	0.000782906	0	-3.91086	1	1
Solyc04g054950	SL3.0ch04	53424590	53426590	-	425	157	398	199	73.024	66.667	-6.35739	0.044611	2.05841	2.52033	0.164399	1
Solyc04g055230	SL3.0ch04	53800145	53802145	+	618	381	305	293	61.862	51.003	-10.8585	0.000154627	1.94385	-0.299145	0.00988946	0.475438
Solyc04g055207	SL3.0ch04	53818388	53820388	-	78	221	71	370	26.087	16.1	-9.98718	0.00426601	-0.654777	1.62312	0.452744	1
Solyc04g055260	SL3.0ch04	53841423	53843423	-	1648	706	1450	755	70.008	65.76	-4.24886	0.00813281	1.81343	-0.300873	0.217976	1
Solyc04g056410	SL3.0ch04	54119353	54121353	+	608	238	475	274	71.868	63.418	-8.44972	0.00155929	0.00693429	1.81392	0.995542	1
Solyc04g056600	SL3.0ch04	54518096	54520096	-	1044	329	902	356	76.038	71.701	-4.33676	0.032762	0.26219	5.427	0.31725	1
Solyc04g057850	SL3.0ch04	54883436	54885436	-	247	519	51	462	32.245	9.942	-22.3039	3.91603e-20	-0.901443	-3.30478	0.827326	1
Solyc04g057930	SL3.0ch04	54984194	54986194	+	447	78	377	111	85.143	77.254	-7.88876	0.00600739	0.498975	5.69225	0.140743	1
Solyc04g057950	SL3.0ch04	55001210	55003210	+	403	456	222	359	46.915	38.21	-8.70503	0.00456584	-1.91658	-2.2539	0.236184	1
Solyc04g063200	SL3.0ch04	55351740	55353740	+	376	520	263	461	41.964	36.326	-5.63832	0.0492626	-2.6825	-3.09357	0.386169	1
Solyc04g063340	SL3.0ch04	55455728	55457728	+	1019	86	620	114	92.217	84.469	-7.74853	2.72546e-06	0.0699668	1.00357	0.91787	1
Solyc04g063360	SL3.0ch04	55480808	55482808	+	789	224	688	252	77.887	73.191	-4.69597	0.042153	-0.10404	4.78427	0.768371	1
Solyc04g064450	SL3.0ch04	55597488	55599488	-	527	165	260	162	76.156	61.611	-14.5447	3.55651e-06	1.78831	-3.87428	1	1
Solyc04g064705	SL3.0ch04	55862427	55864427	-	23	318	13	429	6.745	2.941	-3.80369	0.037697	0.760269	-2.3033	0.589082	1
Solyc04g064720	SL3.0ch04	55877836	55879836	-	647	270	559	299	70.556	65.152	-5.40465	0.0406102	-0.733512	3.91674	0.118237	1
Solyc04g064947	SL3.0ch04	57775242	57777242	-	129	18	134	49	87.755	73.224	-14.5311	0.00544473	0	-3.91086	1	1
Solyc04g071060	SL3.0ch04	58046569	58048569	+	802	189	673	217	80.928	75.618	-5.31038	0.0177144	2.54064	-0.253038	0.00870895	0.449325
Solyc04g071120	SL3.0ch04	58124781	58126781	-	159	723	121	838	18.027	12.617	-5.4099	0.00547605	-0.362668	3.75835	0.440794	1
Solyc04g071800	SL3.0ch04	58887885	58889885	+	715	479	443	528	59.883	45.623	-14.2597	8.76599e-10	-2.60389	6.0232	0.000513524	0.0642517
Solyc04g071860	SL3.0ch04	58958862	58960862	-	724	387	567	435	65.167	56.587	-8.57969	0.000354169	-0.0191039	4.37961	0.951243	1
Solyc04g071870	SL3.0ch04	58966467	58968467	+	763	904	588	871	45.771	40.302	-5.46927	0.00758203	0.105274	4.90218	0.796219	1
Solyc04g071940	SL3.0ch04	59038553	59040553	-	636	628	463	606	50.316	43.312	-7.00495	0.00320106	-0.104491	5.52773	0.711477	1
Solyc04g072000	SL3.0ch04	59153998	59155998	-	425	238	305	234	64.103	56.586	-7.51629	0.0247145	1.46313	0.935755	0.494922	1
Solyc04g072060	SL3.0ch04	59217195	59219195	-	543	185	462	234	74.588	66.379	-8.2086	0.00315498	-0.284664	4.73646	0.388677	1
Solyc04g072070	SL3.0ch04	59217429	59219429	-	606	199	532	249	75.28	68.118	-7.16171	0.00653834	0.0990301	1.18556	0.916385	1
Solyc04g072150	SL3.0ch04	59259021	59261021	+	875	492	740	582	64.009	55.976	-8.03298	0.000168812	-0.987237	-2.02617	0.449974	1
Solyc04g072280	SL3.0ch04	59395524	59397524	+	944	288	735	296	76.623	71.29	-5.33337	0.0139577	4.594	0.746744	0.157539	1
Solyc04g072320	SL3.0ch04	59437453	59439453	-	883	629	644	597	58.399	51.894	-6.50584	0.00299879	-4.97714	-3.49731	0.197708	1
Solyc04g072360	SL3.0ch04	59461501	59463501	+	179	220	113	212	44.862	34.769	-10.0929	0.0182936	0	-3.91086	1	1
Solyc04g072610	SL3.0ch04	59663601	59665601	-	479	668	334	614	41.761	35.232	-6.52905	0.00886207	0.355219	2.40803	0.447057	1
Solyc04g072650	SL3.0ch04	59706470	59708470	-	306	952	229	906	24.324	20.176	-4.14811	0.0393201	-3.28383	-3.29709	0.286618	1
Solyc04g072680	SL3.0ch04	59730409	59732409	-	1277	609	1212	683	67.709	63.958	-3.75165	0.0399653	0	-3.91086	1	1
Solyc04g072850	SL3.0ch04	59900249	59902249	-	452	489	269	413	48.034	39.443	-8.59119	0.00299391	-1.24026	3.76035	0.105505	1
Solyc04g074130	SL3.0ch04	60216403	60218403	+	239	464	182	594	33.997	23.454	-10.5435	6.59097e-05	-0.592925	2.58245	0.204385	1
Solyc04g074220	SL3.0ch04	60298590	60300590	+	1077	554	641	466	66.033	57.904	-8.12886	0.00013624	0.122519	1.22727	0.834621	1
Solyc04g074290	SL3.0ch04	60369310	60371310	-	511	806	386	837	38.8	31.562	-7.23857	0.000835084	-0.116712	6.20866	0.790492	1
Solyc04g074300	SL3.0ch04	60384665	60386665	+	192	661	134	620	22.509	17.772	-4.73691	0.0490503	0.385645	8.60566	0.191891	1
Solyc04g074480	SL3.0ch04	60552255	60554255	+	650	72	389	112	90.028	77.645	-12.383	7.8031e-08	0.535952	6.47558	0.231178	1
Solyc04g074590	SL3.0ch04	60637187	60639187	+	120	369	82	484	24.54	14.488	-10.0522	0.000268604	0.460875	0.29009	0.471023	1
Solyc04g074940	SL3.0ch04	60917705	60919705	-	479	246	381	256	66.069	59.812	-6.25735	0.0430909	0.215378	1.4898	0.697591	1
Solyc04g074990	SL3.0ch04	60968792	60970792	+	239	640	199	703	27.19	22.062	-5.1279	0.0337881	-2.47019	-0.260729	0.0190301	0.659563
Solyc04g075000	SL3.0ch04	60985594	60987594	-	222	262	187	302	45.868	38.241	-7.62646	0.0400127	0.569783	1.82625	0.344928	1
Solyc04g075010	SL3.0ch04	60992378	60994378	+	64	638	27	541	9.117	4.754	-4.36329	0.0101091	0	-3.86959	1	1
Solyc04g076350	SL3.0ch04	61345072	61347072	+	570	643	449	644	46.991	41.08	-5.91133	0.0151935	0.713526	-0.683326	0.503343	1
Solyc04g076500	SL3.0ch04	61447238	61449238	+	941	148	842	184	86.41	82.066	-4.34327	0.0203718	0.992024	2.19763	0.124775	1
Solyc04g076540	SL3.0ch04	61529793	61531793	-	652	129	455	190	83.483	70.543	-12.9401	1.11958e-07	0.53633	5.00262	0.351757	1
Solyc04g076600	SL3.0ch04	61579743	61581743	+	143	126	71	118	53.16	37.566	-15.5937	0.00474193	-0.746397	-0.75074	0.388892	1
Solyc04g076650	SL3.0ch04	61635705	61637705	-	39	325	6	157	10.714	3.681	-7.0333	0.0194405	-2.09003	-0.977302	0.224944	1
Solyc04g076790	SL3.0ch04	61754058	61756058	+	384	529	212	524	42.059	28.804	-13.2548	3.2628e-07	-0.356292	7.41271	0.277814	1
Solyc04g076820	SL3.0ch04	61783646	61785646	-	126	959	61	867	11.613	6.573	-5.03963	0.000615506	0.476943	6.89364	0.083289	1
Solyc04g076840	SL3.0ch04	61823786	61825786	-	188	144	194	232	56.627	45.54	-11.0866	0.00930326	0	-3.91086	1	1
Solyc04g076900	SL3.0ch04	61913539	61915539	+	982	179	666	255	84.582	72.313	-12.2696	2.0453e-10	0.584354	2.1995	0.246717	1
Solyc04g076910	SL3.0ch04	61924802	61926802	+	8	2	2	33	80	5.714	-74.2857	6.55934e-05	0.0750483	4.27287	0.847695	1
Solyc04g077150	SL3.0ch04	62170111	62172111	+	562	247	534	367	69.468	59.267	-10.201	8.43289e-05	0.0479006	4.27985	0.885833	1
Solyc04g077220	SL3.0ch04	62236347	62238347	-	1284	296	1167	364	81.266	76.225	-5.04113	0.00273436	-0.440751	3.57218	0.42443	1
Solyc04g077480	SL3.0ch04	62488082	62490082	-	1125	223	1086	297	83.457	78.525	-4.93203	0.00435994	-0.407297	3.10545	0.309404	1
Solyc04g077485	SL3.0ch04	62488082	62490082	-	1125	223	1086	297	83.457	78.525	-4.93203	0.00435994	0	-3.91086	1	1
Solyc04g077540	SL3.0ch04	62591308	62593308	-	574	432	421	469	57.058	47.303	-9.75428	0.000155207	0.135794	0.950241	0.867362	1
Solyc04g077770	SL3.0ch04	62764849	62766849	-	43	163	37	268	20.874	12.131	-8.74264	0.0249778	0	-3.91086	1	1
Solyc04g077940	SL3.0ch04	62903706	62905706	-	1288	296	993	288	81.313	77.518	-3.79557	0.0341367	0.0520297	4.82471	0.869181	1
Solyc04g077950	SL3.0ch04	62903880	62905880	-	1288	286	991	279	81.83	78.031	-3.79824	0.0317583	1.2181	-1.82929	0.317484	1
Solyc04g077990	SL3.0ch04	62942950	62944950	+	834	807	678	806	50.823	45.687	-5.13534	0.0132827	0.304056	3.54516	0.529971	1
Solyc04g078220	SL3.0ch04	63107174	63109174	-	19	60	9	122	24.051	6.87	-17.1804	0.00277577	0	-3.86745	1	1
Solyc04g078230	SL3.0ch04	63107810	63109810	-	19	60	9	143	24.051	5.921	-18.1296	0.000907621	0	-3.91086	1	1
Solyc04g078310	SL3.0ch04	63151153	63153153	+	560	376	432	526	59.829	45.094	-14.7351	2.84324e-09	-0.473989	-0.229399	0.575394	1
Solyc04g078320	SL3.0ch04	63165347	63167347	-	43	586	11	566	6.836	1.906	-4.92984	0.000227415	0.0944721	5.24077	0.756691	1
Solyc04g078400	SL3.0ch04	63227599	63229599	+	895	550	694	522	61.938	57.072	-4.86535	0.0294923	-0.169082	3.28939	0.678751	1
Solyc04g078410	SL3.0ch04	63227599	63229599	+	895	550	694	522	61.938	57.072	-4.86535	0.0294923	-2.86165	-1.08338	0.00214026	0.182877
Solyc04g078510	SL3.0ch04	63315271	63317271	+	15	297	2	220	4.808	0.901	-3.90679	0.0299449	-0.181237	6.57096	0.503452	1
Solyc04g078530	SL3.0ch04	63328156	63330156	-	49	459	12	322	9.646	3.593	-6.05285	0.00392774	-2.11234	-1.72439	0.120669	1
Solyc04g078740	SL3.0ch04	63491103	63493103	+	387	545	315	618	41.524	33.762	-7.76155	0.00257718	-1.27304	-2.98244	0.397476	1
Solyc04g078970	SL3.0ch04	63686142	63688142	-	730	486	756	626	60.033	54.703	-5.32957	0.0199992	1.32102	0.870574	0.129387	1
Solyc04g079000	SL3.0ch04	63705634	63707634	-	237	207	207	259	53.378	44.421	-8.95778	0.0224005	-0.00676772	5.78717	0.981505	1
Solyc04g079190	SL3.0ch04	63828479	63830479	+	50	579	29	827	7.949	3.388	-4.56128	0.000816994	1.10341	3.60952	0.0399602	0.922721
Solyc04g079607	SL3.0ch04	64115901	64117901	-	853	182	724	266	82.415	73.131	-9.28415	5.96313e-06	1.90213	-3.46242	1	1
Solyc04g080050	SL3.0ch04	64438185	64440185	-	1280	382	922	400	77.016	69.743	-7.27283	6.70938e-05	0.0530237	5.09117	0.84065	1
Solyc04g080090	SL3.0ch04	64458804	64460804	-	55	227	32	327	19.504	8.914	-10.5899	0.000654135	-1.18188	-0.107258	0.182346	1
Solyc04g080180	SL3.0ch04	64531272	64533272	-	1473	586	1139	635	71.54	64.205	-7.3344	1.24003e-05	0.185294	4.56837	0.529841	1
Solyc04g080340	SL3.0ch04	64646130	64648130	-	445	374	327	465	54.335	41.288	-13.0467	1.83561e-06	0.335271	4.62725	0.494734	1
Solyc04g080450	SL3.0ch04	64710230	64712230	+	569	833	455	839	40.585	35.162	-5.42259	0.0134776	-0.15067	4.99207	0.686748	1
Solyc04g080480	SL3.0ch04	64731269	64733269	+	44	299	12	178	12.828	6.316	-6.5122	0.043892	1.77874	-3.58878	1	1
Solyc04g080610	SL3.0ch04	64811321	64813321	-	1339	463	1163	516	74.306	69.267	-5.03891	0.00416994	-0.152888	5.45699	0.622134	1
Solyc04g080670	SL3.0ch04	64863341	64865341	+	120	540	35	467	18.182	6.972	-11.2097	2.23981e-07	0.00843142	5.07482	0.977158	1
Solyc04g080680	SL3.0ch04	64869079	64871079	+	123	252	74	254	32.8	22.561	-10.239	0.0106231	0.47256	1.03896	0.443354	1
Solyc04g080705	SL3.0ch04	64880775	64882775	-	282	486	286	635	36.719	31.053	-5.66555	0.0374093	-0.541338	6.19506	0.177866	1
Solyc04g080780	SL3.0ch04	64954823	64956823	-	310	900	295	1121	25.62	20.833	-4.7865	0.0127215	0.00504667	-3.38812	1	1
Solyc04g080890	SL3.0ch04	65026371	65028371	-	544	570	273	929	48.833	22.712	-26.1209	9.87768e-38	-0.976705	-2.71057	0.632867	1
Solyc04g080900	SL3.0ch04	65026789	65028789	+	545	620	272	899	46.781	23.228	-23.5531	3.10168e-31	-0.250696	4.49137	0.371377	1
Solyc04g080930	SL3.0ch04	65068094	65070094	-	448	414	389	478	51.972	44.867	-7.1048	0.0110478	0.250211	4.35091	0.393355	1
Solyc04g081070	SL3.0ch04	65207267	65209267	-	1382	447	989	389	75.56	71.771	-3.78973	0.0402287	-0.261564	5.72077	0.381382	1
Solyc04g081200	SL3.0ch04	65279994	65281994	+	29	539	9	544	5.106	1.627	-3.47815	0.00548882	0.00314561	5.25092	0.992725	1
Solyc04g081330	SL3.0ch04	65440821	65442821	-	979	451	900	542	68.462	62.413	-6.04822	0.00315384	-0.414928	4.7662	0.201844	1
Solyc04g081470	SL3.0ch04	65514839	65516839	+	98	517	59	475	15.935	11.049	-4.88627	0.0463827	-0.0916652	4.02174	0.784102	1
Solyc04g081520	SL3.0ch04	65553812	65555812	+	87	255	37	207	25.439	15.164	-10.2747	0.00980759	0	-3.82996	1	1
Solyc04g081655	SL3.0ch04	65695417	65697417	-	78	523	41	528	12.978	7.206	-5.77275	0.00515655	1.74136	0.894808	0.00489123	0.314092
Solyc04g081660	SL3.0ch04	65696027	65698027	-	82	664	40	571	10.992	6.547	-4.44531	0.0134738	1.29445	1.55091	0.0258624	0.76324
Solyc04g081720	SL3.0ch04	65738245	65740245	-	1638	188	1374	230	89.704	85.661	-4.04342	0.00175098	0	-3.91086	1	1
Solyc04g081940	SL3.0ch04	65874285	65876285	-	17	249	8	335	6.391	2.332	-4.05862	0.0348626	-0.111028	2.84781	0.779982	1
Solyc04g082080	SL3.0ch04	65950005	65952005	-	527	349	304	393	60.16	43.615	-16.5443	1.41386e-09	0	-3.86883	1	1
Solyc04g082210	SL3.0ch04	66047292	66049292	+	180	391	121	397	31.524	23.359	-8.16457	0.00967484	-0.251726	3.80998	0.562228	1
Solyc04g082260	SL3.0ch04	66075874	66077874	-	258	345	175	355	42.786	33.019	-9.7672	0.00322199	-0.864792	-1.34627	0.321666	1
Solyc04g082450	SL3.0ch04	66181161	66183161	+	2507	244	2359	288	91.13	89.12	-2.01074	0.0345264	-0.365548	2.48966	0.4197	1
Solyc04g082460	SL3.0ch04	66181161	66183161	+	2507	244	2359	288	91.13	89.12	-2.01074	0.0345264	0.231022	5.3693	0.519542	1
Solyc04g082755	SL3.0ch04	66404350	66406350	-	60	1291	15	1051	4.441	1.407	-3.03403	0.000106259	0	-3.91086	1	1
Solyc05g005300	SL3.0ch05	242752	244752	-	116	249	77	284	31.781	21.33	-10.4512	0.00676609	0.193708	-0.480169	0.835052	1
Solyc05g005380	SL3.0ch05	296371	298371	+	358	478	109	460	42.823	19.156	-23.6666	2.30295e-19	-6.75264	-2.84698	0.00196286	0.173352
Solyc05g005550	SL3.0ch05	387557	389557	-	278	396	155	315	41.246	32.979	-8.26757	0.016144	0.248932	7.3147	0.555201	1
Solyc05g005630	SL3.0ch05	438748	440748	+	360	310	345	403	53.731	46.123	-7.60835	0.0149599	0.187396	4.45414	0.527484	1
Solyc05g006220	SL3.0ch05	887348	889348	-	435	716	276	641	37.793	30.098	-7.69508	0.00137804	-0.459419	3.72156	0.586701	1
Solyc05g006410	SL3.0ch05	1047902	1049902	-	803	63	706	104	92.725	87.16	-5.56468	0.000871962	0.244549	2.79099	0.582055	1
Solyc05g006510	SL3.0ch05	1128447	1130447	-	74	1139	39	1149	6.101	3.283	-2.81775	0.00530199	0.385764	2.284	0.484577	1
Solyc05g006620	SL3.0ch05	1277598	1279598	-	573	512	492	575	52.811	46.111	-6.70047	0.00699736	0.078631	5.33792	0.806594	1
Solyc05g006630	SL3.0ch05	1279120	1281120	+	412	886	282	868	31.741	24.522	-7.2194	0.00045492	0.28604	3.60443	0.414825	1
Solyc05g006990	SL3.0ch05	1579963	1581963	+	257	556	150	485	31.611	23.622	-7.98927	0.00333488	-0.855243	1.92668	0.219598	1
Solyc05g007040	SL3.0ch05	1629849	1631849	-	1383	210	1374	297	86.817	82.226	-4.59111	0.00165039	-2.86107	0.0133847	0.0378491	0.904612
Solyc05g007050	SL3.0ch05	1635300	1637300	+	161	1140	87	1038	12.375	7.733	-4.64176	0.000869071	0.234878	4.64712	0.430275	1
Solyc05g007180	SL3.0ch05	1794798	1796798	+	318	301	267	351	51.373	43.204	-8.1693	0.0139366	-0.844397	4.69518	0.314449	1
Solyc05g007230	SL3.0ch05	1870861	1872861	-	640	579	547	611	52.502	47.237	-5.26544	0.0290955	-3.10577	-3.13767	0.209503	1
Solyc05g007250	SL3.0ch05	1922948	1924948	-	1367	355	1232	432	79.384	74.038	-5.34598	0.00125796	0.023361	7.38278	0.943134	1
Solyc05g007580	SL3.0ch05	2121075	2123075	-	258	286	224	374	47.426	37.458	-9.96828	0.00329149	-1.19399	-1.5767	0.285017	1
Solyc05g007800	SL3.0ch05	2240537	2242537	+	974	596	746	553	62.038	57.429	-4.60943	0.0330334	0.261871	6.20542	0.456138	1
Solyc05g007860	SL3.0ch05	2301405	2303405	+	776	397	588	405	66.155	59.215	-6.94066	0.00389653	0	-3.91086	1	1
Solyc05g007870	SL3.0ch05	2310349	2312349	+	191	335	125	393	36.312	24.131	-12.1805	0.00014716	1.78829	-3.87428	1	1
Solyc05g007950	SL3.0ch05	2374771	2376771	-	249	453	179	475	35.47	27.37	-8.10005	0.00593664	-3.24096	-2.48165	0.202202	1
Solyc05g008000	SL3.0ch05	2427190	2429190	+	269	587	152	540	31.425	21.965	-9.45992	0.000224544	-0.862775	0.48997	0.332347	1
Solyc05g008210	SL3.0ch05	2603203	2605203	-	579	266	560	339	68.521	62.291	-6.22928	0.0193124	1.39017	1.88355	0.123643	1
Solyc05g008300	SL3.0ch05	2676162	2678162	-	249	994	157	853	20.032	15.545	-4.48763	0.0176067	-1.15246	-0.202653	0.250857	1
Solyc05g008340	SL3.0ch05	2703384	2705384	-	220	223	34	319	49.661	9.632	-40.0297	5.42059e-34	-0.0941317	3.34401	0.786405	1
Solyc05g008390	SL3.0ch05	2760306	2762306	-	338	542	179	583	38.409	23.491	-14.9183	1.43952e-09	0.0252779	4.58689	0.962415	1
Solyc05g008400	SL3.0ch05	2766417	2768417	+	1679	288	1255	305	85.358	80.449	-4.9097	0.000647136	0.557279	3.0669	0.179683	1
Solyc05g008480	SL3.0ch05	2825857	2827857	+	1682	615	1515	707	73.226	68.182	-5.04413	0.00112673	-0.0385703	1.5787	0.958863	1
Solyc05g008540	SL3.0ch05	2863162	2865162	+	1007	189	833	212	84.197	79.713	-4.48441	0.0197011	-0.274698	2.58039	0.578023	1
Solyc05g008570	SL3.0ch05	2886711	2888711	+	608	840	472	898	41.989	34.453	-7.5364	0.000255272	0	-3.91086	1	1
Solyc05g008640	SL3.0ch05	2947983	2949983	+	435	628	293	652	40.922	31.005	-9.91663	3.41785e-05	0.912827	2.21643	0.229197	1
Solyc05g008920	SL3.0ch05	3131132	3133132	-	344	381	186	318	47.448	36.905	-10.5435	0.00139233	0.60447	6.57936	0.0978839	1
Solyc05g008940	SL3.0ch05	3147135	3149135	+	27	378	1	130	6.667	0.763	-5.90331	0.0170135	0.20752	1.81295	0.82644	1
Solyc05g009190	SL3.0ch05	3334032	3336032	-	289	72	147	173	80.055	45.938	-34.1179	5.72167e-19	0.179654	5.57474	0.507532	1
Solyc05g009330	SL3.0ch05	3482510	3484510	-	662	456	588	511	59.213	53.503	-5.7097	0.0201984	-0.0517162	4.29085	0.922927	1
Solyc05g009440	SL3.0ch05	3613779	3615779	-	289	834	233	882	25.735	20.897	-4.83778	0.0201693	0	-3.91086	1	1
Solyc05g009510	SL3.0ch05	3682315	3684315	-	1266	359	915	331	77.908	73.435	-4.4727	0.0185633	0	-3.91086	1	1
Solyc05g009750	SL3.0ch05	3953749	3955749	-	323	604	198	524	34.844	27.424	-7.41976	0.00524406	0.395612	-1.85282	0.70722	1
Solyc05g009780	SL3.0ch05	3981079	3983079	-	1092	704	758	589	60.802	56.273	-4.52858	0.0302348	0.0373721	4.72665	0.917508	1
Solyc05g009800	SL3.0ch05	4023354	4025354	-	558	229	360	237	70.902	60.302	-10.6007	0.000282009	-0.279697	5.31531	0.386433	1
Solyc05g009810	SL3.0ch05	4026899	4028899	+	315	439	249	506	41.777	32.98	-8.79706	0.00205293	0	-3.91086	1	1
Solyc05g009930	SL3.0ch05	4156369	4158369	-	536	688	359	650	43.791	35.58	-8.21107	0.000540297	-0.320483	5.66506	0.327569	1
Solyc05g009950	SL3.0ch05	4168252	4170252	-	118	384	60	316	23.506	15.957	-7.54853	0.0192832	-0.102002	3.24354	0.882337	1
Solyc05g009960	SL3.0ch05	4168574	4170574	+	117	302	60	262	27.924	18.634	-9.29009	0.0130033	0	-3.91086	1	1
Solyc05g010280	SL3.0ch05	4440422	4442422	+	2498	114	2006	130	95.636	93.914	-1.72167	0.0229439	-0.208014	5.17816	0.454297	1
Solyc05g010300	SL3.0ch05	4453133	4455133	+	64	88	73	261	42.105	21.856	-20.249	5.66569e-05	0.0607247	5.31879	0.838321	1
Solyc05g010370	SL3.0ch05	4515353	4517353	+	26	80	3	39	24.528	7.143	-17.3854	0.0471771	0	-3.91086	1	1
Solyc05g010450	SL3.0ch05	4696978	4698978	+	216	209	200	278	50.824	41.841	-8.98253	0.0213756	0.00452173	5.38972	0.989813	1
Solyc05g010470	SL3.0ch05	4711829	4713829	-	182	189	137	230	49.057	37.33	-11.7269	0.00539187	0.195893	4.54778	0.536797	1
Solyc05g010550	SL3.0ch05	4760635	4762635	-	585	695	482	736	45.703	39.573	-6.13005	0.00757442	5.52809	-2.97336	0.0111276	0.503174
Solyc05g010560	SL3.0ch05	4771299	4773299	+	977	280	933	422	77.725	68.856	-8.86865	3.83487e-06	-3.99956	-3.59902	0.141779	1
Solyc05g010585	SL3.0ch05	4803299	4805299	+	754	267	456	252	73.849	64.407	-9.44239	0.000204564	0	-3.91086	1	1
Solyc05g010775	SL3.0ch05	4972951	4974951	+	113	325	58	289	25.799	16.715	-9.08439	0.00812546	-0.0795222	1.35782	0.914709	1
Solyc05g011840	SL3.0ch05	5072910	5074910	+	554	645	448	693	46.205	39.264	-6.94137	0.00307055	0	-3.41497	1	1
Solyc05g011885	SL3.0ch05	5109408	5111408	-	1044	512	857	541	67.095	61.302	-5.79326	0.0043314	0	-3.87283	1	1
Solyc05g012215	SL3.0ch05	5496543	5498543	+	1050	415	885	555	71.672	61.458	-10.214	8.38589e-08	0	-3.91086	1	1
Solyc05g012220	SL3.0ch05	5496580	5498580	+	1050	415	885	555	71.672	61.458	-10.214	8.38589e-08	-0.281897	3.20975	0.444626	1
Solyc05g012260	SL3.0ch05	5552822	5554822	-	818	232	719	274	77.905	72.407	-5.49791	0.0131329	-0.0750012	5.82734	0.782531	1
Solyc05g012450	SL3.0ch05	5699202	5701202	-	51	342	28	389	12.977	6.715	-6.26247	0.010051	0.299024	5.70271	0.342023	1
Solyc05g012570	SL3.0ch05	5798106	5800106	-	127	726	93	747	14.889	11.071	-3.8172	0.0479384	0.28252	-2.01688	0.831867	1
Solyc05g012580	SL3.0ch05	5798174	5800174	+	126	730	93	765	14.72	10.839	-3.88047	0.0410389	0.136762	8.22842	0.670813	1
Solyc05g012590	SL3.0ch05	5803782	5805782	+	715	517	600	592	58.036	50.336	-7.70014	0.000808032	-0.0992142	4.59945	0.761409	1
Solyc05g012660	SL3.0ch05	5868249	5870249	+	1471	917	1055	852	61.6	55.322	-6.27717	0.000219128	1.64274	-1.34866	0.464984	1
Solyc05g012870	SL3.0ch05	6016916	6018916	+	326	850	247	810	27.721	23.368	-4.35307	0.0463751	0.530417	-2.23269	0.765358	1
Solyc05g013160	SL3.0ch05	6243115	6245115	+	1463	203	1474	300	87.815	83.089	-4.72606	0.000524861	-0.374164	5.88813	0.294251	1
Solyc05g013340	SL3.0ch05	6438049	6440049	-	521	482	446	535	51.944	45.464	-6.48036	0.0129978	0.0169982	6.92642	0.944655	1
Solyc05g013350	SL3.0ch05	6438764	6440764	+	454	434	361	444	51.126	44.845	-6.28141	0.0268405	0	-3.91086	1	1
Solyc05g013640	SL3.0ch05	6942754	6944754	+	802	481	515	459	62.51	52.875	-9.635	3.96031e-05	0.226758	0.890008	0.743878	1
Solyc05g013670	SL3.0ch05	6980471	6982471	-	328	335	288	466	49.472	38.196	-11.2758	0.000151276	-0.353916	3.89923	0.343687	1
Solyc05g013740	SL3.0ch05	7047923	7049923	+	668	317	451	320	67.817	58.495	-9.3218	0.000380289	0.113613	5.43368	0.662436	1
Solyc05g013795	SL3.0ch05	7118238	7120238	-	587	256	519	332	69.632	60.987	-8.64519	0.00101784	-0.396402	-1.55427	0.750932	1
Solyc05g013820	SL3.0ch05	7132561	7134561	-	550	253	494	300	68.493	62.217	-6.27653	0.023902	0.289616	5.56876	0.326234	1
Solyc05g013870	SL3.0ch05	7266698	7268698	+	420	321	322	324	56.68	49.845	-6.83496	0.0297671	-1.12856	2.95067	0.265583	1
Solyc05g014140	SL3.0ch05	7833779	7835779	-	947	364	687	348	72.235	66.377	-5.85812	0.00855291	-0.837485	-2.65302	0.602326	1
Solyc05g014160	SL3.0ch05	7901964	7903964	-	679	59	276	123	92.005	69.173	-22.8325	8.63433e-21	-0.669143	2.01074	0.12381	1
Solyc05g014163	SL3.0ch05	7905432	7907432	-	289	180	282	284	61.62	49.823	-11.7971	0.000874905	0.804834	-1.43879	0.378781	1
Solyc05g014290	SL3.0ch05	8095798	8097798	-	655	468	574	584	58.326	49.568	-8.75769	0.00020931	-5.03173	-2.63627	0.0834348	1
Solyc05g014360	SL3.0ch05	8207952	8209952	+	575	722	382	726	44.333	34.477	-9.85654	9.49308e-06	0.90411	-0.225177	0.191072	1
Solyc05g014370	SL3.0ch05	8216333	8218333	-	1139	84	1033	114	93.132	90.061	-3.07061	0.0212938	-0.100007	1.60084	0.852565	1
Solyc05g014440	SL3.0ch05	8295233	8297233	+	327	44	264	64	88.14	80.488	-7.65236	0.0185633	0	-3.91086	1	1
Solyc05g014900	SL3.0ch05	9115163	9117163	-	500	161	406	205	75.643	66.448	-9.19452	0.00156741	0	-3.91086	1	1
Solyc05g014910	SL3.0ch05	9115547	9117547	-	336	133	206	146	71.642	58.523	-13.1191	0.000599187	0	-3.91086	1	1
Solyc05g014920	SL3.0ch05	9115851	9117851	-	491	155	412	179	76.006	69.712	-6.29384	0.0368399	0	-3.91086	1	1
Solyc05g015070	SL3.0ch05	9781159	9783159	-	240	452	180	456	34.682	28.302	-6.38019	0.033603	1.60642	-2.48199	0.41363	1
Solyc05g015170	SL3.0ch05	9988230	9990230	-	1410	83	1280	117	94.441	91.625	-2.81581	0.0109152	0	-3.91086	1	1
Solyc05g015480	SL3.0ch05	10695102	10697102	+	514	360	339	411	58.81	45.2	-13.6101	6.66765e-07	-0.391442	3.3282	0.313965	1
Solyc05g015955	SL3.0ch05	13145889	13147889	-	225	929	118	714	19.497	14.183	-5.31471	0.00763989	0	-3.91086	1	1
Solyc05g015980	SL3.0ch05	13146310	13148310	-	500	689	322	556	42.052	36.674	-5.37788	0.0355094	0.0536685	3.50981	0.899437	1
Solyc05g015990	SL3.0ch05	13272467	13274467	-	560	188	467	219	74.866	68.076	-6.79051	0.0151388	0	-3.91086	1	1
Solyc05g016040	SL3.0ch05	13800119	13802119	-	763	141	576	153	84.403	79.012	-5.39031	0.0162508	0	-3.91086	1	1
Solyc05g016257	SL3.0ch05	15427486	15429486	+	31	224	4	179	12.157	2.186	-9.97107	0.000614066	0.112575	-0.16409	0.892272	1
Solyc05g016624	SL3.0ch05	17739776	17741776	-	1052	299	952	345	77.868	73.4	-4.46809	0.0215023	0	-3.91086	1	1
Solyc05g017890	SL3.0ch05	19076608	19078608	-	143	532	40	653	21.185	5.772	-15.4132	4.98608e-16	0	-3.91086	1	1
Solyc05g018150	SL3.0ch05	20090378	20092378	+	981	157	503	133	86.204	79.088	-7.11582	0.000722946	0.299853	5.52537	0.29211	1
Solyc05g018185	SL3.0ch05	20201468	20203468	+	434	341	336	385	56	46.602	-9.39806	0.00144442	0	-3.91086	1	1
Solyc05g018400	SL3.0ch05	20713991	20715991	+	66	283	31	332	18.911	8.54	-10.3712	0.000428491	0	-3.91086	1	1
Solyc05g018610	SL3.0ch05	22517331	22519331	-	1287	238	1190	330	84.393	78.289	-6.10397	0.000128701	0.102128	5.43825	0.690291	1
Solyc05g018650	SL3.0ch05	22707994	22709994	-	407	194	535	367	67.72	59.313	-8.40783	0.00435211	-0.190686	6.50677	0.543643	1
Solyc05g018653	SL3.0ch05	22710331	22712331	-	1231	134	1340	192	90.183	87.467	-2.71579	0.0495536	0.252463	3.51667	0.634452	1
Solyc05g018770	SL3.0ch05	23628732	23630732	-	1354	156	1259	212	89.669	85.588	-4.08084	0.00344259	-4.89719	-2.45747	0.0314045	0.825939
Solyc05g018790	SL3.0ch05	23784377	23786377	-	957	249	703	235	79.353	74.947	-4.40654	0.04041	0	-3.91086	1	1
Solyc05g018920	SL3.0ch05	24601085	24603085	-	926	126	674	138	88.023	83.005	-5.01789	0.00882933	0	-3.91086	1	1
Solyc05g021167	SL3.0ch05	26619818	26621818	-	405	41	312	61	90.807	83.646	-7.16106	0.00957631	0	-3.91086	1	1
Solyc05g021480	SL3.0ch05	27704056	27706056	-	94	326	21	309	22.381	6.364	-16.0173	7.79797e-09	0	-3.91086	1	1
Solyc05g021485	SL3.0ch05	27943134	27945134	+	254	146	143	170	63.5	45.687	-17.8131	2.09012e-05	0	-3.91086	1	1
Solyc05g023660	SL3.0ch05	28688554	28690554	+	887	257	671	283	77.535	70.335	-7.19954	0.00106082	0	-3.91086	1	1
Solyc05g023670	SL3.0ch05	28883385	28885385	-	173	812	136	858	17.563	13.682	-3.88136	0.0440032	0	-3.91086	1	1
Solyc05g023990	SL3.0ch05	30172672	30174672	-	640	562	454	515	53.245	46.852	-6.39217	0.0110219	7.07138	-1.96632	3.8575e-05	0.00938606
Solyc05g024120	SL3.0ch05	30435438	30437438	-	354	45	298	72	88.722	80.541	-8.18126	0.00661432	-0.0112119	-3.65466	1	1
Solyc05g024173	SL3.0ch05	30607855	30609855	-	585	348	375	287	62.701	56.647	-6.05444	0.0409628	0	-3.91086	1	1
Solyc05g024490	SL3.0ch05	32240588	32242588	-	140	204	32	224	40.698	12.5	-28.1977	2.42397e-13	-3.284	0.565702	0.00508863	0.319877
Solyc05g025710	SL3.0ch05	36046011	36048011	+	414	135	255	217	75.41	54.025	-21.3844	2.00675e-11	0	-3.91086	1	1
Solyc05g025910	SL3.0ch05	37900777	37902777	+	28	423	11	437	6.208	2.455	-3.75307	0.0226119	-0.0124871	-3.79423	1	1
Solyc05g025920	SL3.0ch05	38036853	38038853	+	736	294	514	289	71.456	64.01	-7.44635	0.00306313	-1.54052	-2.70604	0.367197	1
Solyc05g026157	SL3.0ch05	39946206	39948206	+	295	710	151	748	29.353	16.796	-12.5568	1.82468e-09	0	-3.91086	1	1
Solyc05g026360	SL3.0ch05	40928554	40930554	+	867	229	628	213	79.106	74.673	-4.43283	0.0499313	-0.246482	-0.392339	0.819108	1
Solyc05g026490	SL3.0ch05	41514686	41516686	-	301	54	210	70	84.789	75	-9.78873	0.00854017	0	-3.91086	1	1
Solyc05g026500	SL3.0ch05	41619271	41621271	+	372	822	249	723	31.156	25.617	-5.53849	0.0150173	0.55403	0.852656	0.33834	1
Solyc05g040040	SL3.0ch05	49801116	49803116	+	487	94	549	179	83.821	75.412	-8.40891	0.00109557	0	-3.87342	1	1
Solyc05g041117	SL3.0ch05	50435497	50437497	+	1411	247	1130	306	85.103	78.691	-6.41173	3.25179e-05	0	-3.91086	1	1
Solyc05g041140	SL3.0ch05	50435497	50437497	+	1411	247	1130	306	85.103	78.691	-6.41173	3.25179e-05	3.93328	-3.72245	0.207892	1
Solyc05g041340	SL3.0ch05	52084373	52086373	+	301	116	237	131	72.182	64.402	-7.78008	0.0482452	0	-3.83582	1	1
Solyc05g041810	SL3.0ch05	54601401	54603401	-	1585	234	1264	258	87.136	83.049	-4.08717	0.00410918	0	-3.91086	1	1
Solyc05g041870	SL3.0ch05	54644396	54646396	-	1039	526	756	548	66.39	57.975	-8.41432	3.32646e-05	0	-3.91086	1	1
Solyc05g042007	SL3.0ch05	55343432	55345432	-	638	464	397	495	57.895	44.507	-13.388	5.29689e-08	0	-3.91086	1	1
Solyc05g042030	SL3.0ch05	55343499	55345499	+	638	464	397	495	57.895	44.507	-13.388	5.29689e-08	0.44313	6.23372	0.186907	1
Solyc05g043217	SL3.0ch05	56422668	56424668	-	704	217	713	310	76.439	69.697	-6.74168	0.0037017	0.157861	-0.00990534	0.893685	1
Solyc05g043240	SL3.0ch05	56422668	56424668	-	704	217	713	310	76.439	69.697	-6.74168	0.0037017	0.215571	-1.41027	0.848073	1
Solyc05g046140	SL3.0ch05	59172894	59174894	-	363	126	298	152	74.233	66.222	-8.01091	0.0227586	0	-3.4854	1	1
Solyc05g046160	SL3.0ch05	59203380	59205380	-	837	151	630	165	84.717	79.245	-5.47132	0.00948479	0	-3.91086	1	1
Solyc05g046270	SL3.0ch05	59292000	59294000	-	871	61	721	79	93.455	90.125	-3.32994	0.0335682	-0.731323	1.17057	0.338866	1
Solyc05g047440	SL3.0ch05	59743396	59745396	-	857	6517	538	4705	11.622	10.261	-1.36061	0.0407475	1.83095	-3.03427	1	1
Solyc05g047450	SL3.0ch05	59743360	59745360	+	856	6488	536	4667	11.656	10.302	-1.35402	0.0429058	0.0459539	5.64445	0.866435	1
Solyc05g047470	SL3.0ch05	59800258	59802258	+	522	226	366	216	69.786	62.887	-6.8995	0.0233405	0	-3.91086	1	1
Solyc05g048830	SL3.0ch05	60373640	60375640	-	709	624	576	631	53.188	47.722	-5.46667	0.0181864	0.155111	0.793713	0.837135	1
Solyc05g049890	SL3.0ch05	60497858	60499858	+	568	403	467	428	58.496	52.179	-6.31762	0.019911	0	-3.91086	1	1
Solyc05g049940	SL3.0ch05	60623172	60625172	+	593	323	448	319	64.738	58.409	-6.3286	0.0242964	-0.122384	2.21325	0.759321	1
Solyc05g050000	SL3.0ch05	60707049	60709049	-	224	751	157	718	22.974	17.943	-5.0315	0.0226914	0.291252	2.71623	0.490714	1
Solyc05g050010	SL3.0ch05	60737402	60739402	+	359	210	194	214	63.093	47.549	-15.5441	1.54087e-05	2.00291	7.4093	0.00182224	0.164176
Solyc05g050015	SL3.0ch05	60769846	60771846	-	1193	237	1032	283	83.427	78.479	-4.94749	0.00433689	2.77061	-3.45694	0.664242	1
Solyc05g050280	SL3.0ch05	61193020	61195020	+	158	907	64	931	14.836	6.432	-8.40352	1.08432e-08	-1.80823	3.2921	0.00366172	0.258254
Solyc05g050290	SL3.0ch05	61219636	61221636	+	530	56	447	86	90.444	83.865	-6.57877	0.00460208	-2.58861	-3.28188	0.581412	1
Solyc05g050650	SL3.0ch05	61635742	61637742	+	116	944	59	749	10.943	7.302	-3.64142	0.0227058	0	-3.91086	1	1
Solyc05g050700	SL3.0ch05	61684396	61686396	+	620	59	604	89	91.311	87.157	-4.15346	0.0366425	-1.22722	-1.03671	0.0633999	1
Solyc05g050740	SL3.0ch05	61717651	61719651	+	485	208	385	317	69.986	54.843	-15.1423	9.01056e-08	0.266292	2.44852	0.58309	1
Solyc05g050735	SL3.0ch05	61717674	61719674	+	457	202	356	298	69.347	54.434	-14.9132	4.2576e-07	4.40032	-3.04081	0.20568	1
Solyc05g050805	SL3.0ch05	61841170	61843170	+	127	295	48	226	30.095	17.518	-12.5765	0.000901423	-0.560916	-1.98732	0.706751	1
Solyc05g050920	SL3.0ch05	61989664	61991664	-	505	349	299	350	59.133	46.071	-13.0626	5.40166e-06	-0.0564147	3.37763	0.873089	1
Solyc05g051390	SL3.0ch05	62535215	62537215	-	1510	197	1225	214	88.459	85.129	-3.33072	0.0196286	0.368451	-3.21188	0.907667	1
Solyc05g051540	SL3.0ch05	62755020	62757020	+	178	718	135	749	19.866	15.271	-4.59458	0.0326363	0	-3.87249	1	1
Solyc05g052020	SL3.0ch05	63206482	63208482	+	650	228	664	329	74.032	66.868	-7.16381	0.00345074	0.336481	5.08801	0.263735	1
Solyc05g052100	SL3.0ch05	63277665	63279665	-	744	460	686	561	61.794	55.012	-6.78199	0.00292897	-0.357634	3.87586	0.464484	1
Solyc05g052130	SL3.0ch05	63290008	63292008	+	1227	450	979	459	73.166	68.081	-5.0857	0.00738229	0.320602	-0.743573	0.681746	1
Solyc05g052140	SL3.0ch05	63296186	63298186	-	461	76	328	96	85.847	77.358	-8.48881	0.00301948	0.0465137	2.40596	0.940971	1
Solyc05g052320	SL3.0ch05	63436129	63438129	+	27	494	3	330	5.182	0.901	-4.28144	0.00224102	-0.580276	-1.40821	0.465783	1
Solyc05g052330	SL3.0ch05	63444576	63446576	-	259	93	141	107	73.58	56.855	-16.7247	0.000159573	0	-3.91086	1	1
Solyc05g052660	SL3.0ch05	63726994	63728994	-	220	594	170	605	27.027	21.935	-5.09154	0.046062	-3.15571	-2.72367	0.0964631	1
Solyc05g052750	SL3.0ch05	63791182	63793182	-	379	617	275	579	38.052	32.201	-5.8508	0.0263914	0.0501608	4.47518	0.940737	1
Solyc05g052760	SL3.0ch05	63802570	63804570	+	327	180	284	238	64.497	54.406	-10.0909	0.00471811	0.180523	7.74414	0.52178	1
Solyc05g052780	SL3.0ch05	63811300	63813300	+	1111	306	999	366	78.405	73.187	-5.21827	0.00542945	-0.292163	6.47529	0.329348	1
Solyc05g052860	SL3.0ch05	63896517	63898517	+	520	690	386	666	42.975	36.692	-6.28319	0.00903415	0.141284	-0.781387	1	1
Solyc05g052870	SL3.0ch05	63896621	63898621	+	470	686	319	666	40.657	32.386	-8.27165	0.000454875	-0.562489	0.917468	0.409284	1
Solyc05g053000	SL3.0ch05	64016004	64018004	+	854	1360	783	1445	38.573	35.144	-3.42909	0.0431117	-1.25206	-0.364025	0.0774416	1
Solyc05g053050	SL3.0ch05	64056074	64058074	-	259	206	222	259	55.699	46.154	-9.54508	0.0113905	2.95182	-1.74556	0.0300305	0.811891
Solyc05g053060	SL3.0ch05	64055987	64057987	+	259	206	222	259	55.699	46.154	-9.54508	0.0113905	0	-3.91086	1	1
Solyc05g053130	SL3.0ch05	64083809	64085809	+	836	431	686	435	65.983	61.195	-4.78727	0.0409452	0.0120884	5.02929	0.9655	1
Solyc05g053450	SL3.0ch05	64366965	64368965	+	132	347	148	602	27.557	19.733	-7.82408	0.00626103	0	-3.91086	1	1
Solyc05g053565	SL3.0ch05	64495523	64497523	-	392	805	221	634	32.749	25.848	-6.90058	0.00316487	0	-3.91086	1	1
Solyc05g053790	SL3.0ch05	64664424	64666424	-	466	364	379	384	56.145	49.672	-6.47223	0.027897	-0.408961	-2.47114	0.844477	1
Solyc05g053860	SL3.0ch05	64742282	64744282	+	800	659	704	744	54.832	48.619	-6.21329	0.00351035	0.728356	7.00883	0.193589	1
Solyc05g054020	SL3.0ch05	64838495	64840495	+	339	379	290	431	47.214	40.222	-6.99257	0.0223085	0.147945	-0.678867	0.879036	1
Solyc05g054170	SL3.0ch05	64969254	64971254	-	348	531	249	506	39.59	32.98	-6.61031	0.0186368	-0.10536	5.94738	0.851657	1
Solyc05g054430	SL3.0ch05	65209066	65211066	+	415	188	301	202	68.823	59.841	-8.9816	0.00715452	0.174775	1.74445	0.730532	1
Solyc05g054460	SL3.0ch05	65231478	65233478	+	494	328	290	348	60.097	45.455	-14.6428	3.57506e-07	0.294991	4.60209	0.325043	1
Solyc05g054640	SL3.0ch05	65354980	65356980	+	139	411	29	337	25.273	7.923	-17.3492	1.16913e-10	0.255534	7.46661	0.367128	1
Solyc05g054650	SL3.0ch05	65367545	65369545	+	353	232	314	363	60.342	46.381	-13.9608	8.16711e-06	1.94478	0.611369	0.371902	1
Solyc05g054720	SL3.0ch05	65425012	65427012	+	1206	137	1012	154	89.799	86.792	-3.0065	0.0478885	0.0936451	6.88703	0.754552	1
Solyc05g054740	SL3.0ch05	65439282	65441282	+	202	450	113	384	30.982	22.736	-8.24518	0.00761028	-0.409831	4.82002	0.23897	1
Solyc05g054820	SL3.0ch05	65483395	65485395	+	864	529	671	511	62.024	56.768	-5.25622	0.0201355	-1.78652	-2.75357	0.382888	1
Solyc05g054840	SL3.0ch05	65493891	65495891	+	244	267	115	202	47.75	36.278	-11.4719	0.00564342	-0.0922655	3.17288	0.824436	1
Solyc05g055010	SL3.0ch05	65638039	65640039	-	1163	334	1037	394	77.689	72.467	-5.2219	0.00457303	0.34919	5.3122	0.273397	1
Solyc05g055060	SL3.0ch05	65704224	65706224	-	527	307	440	325	63.189	57.516	-5.67311	0.0488745	-0.0160039	6.34086	0.954075	1
Solyc05g055140	SL3.0ch05	65767585	65769585	-	538	821	299	889	39.588	25.168	-14.4196	2.74417e-13	-2.14773	-3.00487	0.32395	1
Solyc05g055180	SL3.0ch05	65784277	65786277	-	690	447	531	442	60.686	54.573	-6.11253	0.0146282	0	-3.87049	1	1
Solyc05g055185	SL3.0ch05	65787018	65789018	-	650	246	456	246	72.545	64.957	-7.58738	0.00494924	-5.62937	-3.33986	0.0376229	0.903152
Solyc05g055220	SL3.0ch05	65809281	65811281	-	646	685	457	626	48.535	42.198	-6.33734	0.00744214	0.476291	-2.46243	0.853306	1
Solyc05g055260	SL3.0ch05	65827201	65829201	-	900	294	768	358	75.377	68.206	-7.17085	0.000694286	0.325303	6.65068	0.417211	1
Solyc05g055270	SL3.0ch05	65827588	65829588	+	927	329	669	384	73.806	63.533	-10.273	1.37401e-06	0	-3.47677	1	1
Solyc05g055350	SL3.0ch05	65887023	65889023	-	217	406	138	425	34.831	24.512	-10.3199	0.000607563	-0.517403	4.8425	0.120544	1
Solyc05g055560	SL3.0ch05	65997880	65999880	+	86	330	37	412	20.673	8.241	-12.4325	1.93665e-06	0	-3.91086	1	1
Solyc05g055630	SL3.0ch05	66050040	66052040	+	924	154	785	177	85.714	81.601	-4.11345	0.0344321	0.0899364	4.22635	0.769878	1
Solyc05g055720	SL3.0ch05	66099266	66101266	+	91	93	65	142	49.457	31.401	-18.0556	0.00146882	0	-3.91086	1	1
Solyc05g055930	SL3.0ch05	66219592	66221592	-	142	305	104	338	31.767	23.529	-8.23793	0.0200578	0	-3.91086	1	1
Solyc05g056310	SL3.0ch05	66491942	66493942	+	469	158	466	210	74.801	68.935	-5.86573	0.0455081	-0.0444723	7.56566	0.87105	1
Solyc05g056490	SL3.0ch05	66615021	66617021	-	144	499	81	405	22.395	16.667	-5.72836	0.0458646	0.308623	0.119502	0.670479	1
Solyc05g056500	SL3.0ch05	66616304	66618304	+	131	352	80	457	27.122	14.898	-12.2246	1.83904e-05	1.19699	0.297943	0.382452	1
Solyc06g005240	SL3.0ch06	261555	263555	-	728	644	394	500	53.061	44.072	-8.98964	0.000201549	0	-3.91086	1	1
Solyc06g005280	SL3.0ch06	287810	289810	+	576	500	425	477	53.532	47.118	-6.41408	0.0157193	-1.31674	0.860802	0.61178	1
Solyc06g005570	SL3.0ch06	615667	617667	-	1301	555	849	551	70.097	60.643	-9.45413	2.72319e-07	0.251964	5.10243	0.399245	1
Solyc06g005630	SL3.0ch06	694520	696520	-	29	339	14	396	7.88	3.415	-4.4658	0.0209834	-0.00898165	1.90338	0.993145	1
Solyc06g005650	SL3.0ch06	716168	718168	-	291	579	244	624	33.448	28.111	-5.33768	0.040812	0.238619	7.59947	0.55295	1
Solyc06g005740	SL3.0ch06	777643	779643	-	406	115	316	153	77.927	67.377	-10.5497	0.00127259	-0.214338	-2.63092	0.951221	1
Solyc06g005940	SL3.0ch06	925705	927705	-	533	649	450	693	45.093	39.37	-5.72298	0.0169011	0.122265	8.1732	0.687354	1
Solyc06g006057	SL3.0ch06	1073064	1075064	+	1176	658	826	557	64.122	59.725	-4.3969	0.0298046	-1.59404	-2.11575	0.169998	1
Solyc06g007170	SL3.0ch06	1228004	1230004	+	570	679	413	652	45.637	38.779	-6.85717	0.00405582	-1.08366	-0.512909	0.159102	1
Solyc06g007500	SL3.0ch06	1497354	1499354	-	563	476	405	486	54.187	45.455	-8.73217	0.000809408	3.5967	-3.76036	0.440323	1
Solyc06g007550	SL3.0ch06	1558487	1560487	-	581	189	552	245	75.455	69.26	-6.19482	0.0196122	0	-3.48739	1	1
Solyc06g007640	SL3.0ch06	1651100	1653100	-	631	420	328	429	60.038	43.329	-16.7091	6.52767e-11	-0.0915704	6.08267	0.748206	1
Solyc06g007660	SL3.0ch06	1666828	1668828	-	116	917	47	783	11.229	5.663	-5.56678	0.000156055	-0.000115957	4.57032	1	1
Solyc06g007780	SL3.0ch06	1725086	1727086	+	431	283	398	344	60.364	53.639	-6.72533	0.0292702	0.0465568	4.03843	0.888028	1
Solyc06g008040	SL3.0ch06	1903229	1905229	-	1513	430	1314	557	77.869	70.23	-7.63945	9.61706e-07	-0.0596335	5.96044	0.841531	1
Solyc06g008235	SL3.0ch06	2106385	2108385	+	784	246	683	296	76.117	69.765	-6.35144	0.00576847	3.71642	-3.16928	0.361224	1
Solyc06g008260	SL3.0ch06	2131392	2133392	+	888	49	754	75	94.771	90.953	-3.81759	0.00725017	0.0337928	7.67751	0.917307	1
Solyc06g008450	SL3.0ch06	2358814	2360814	-	1276	564	1101	580	69.348	65.497	-3.8511	0.0388024	0.187056	1.33135	0.713652	1
Solyc06g008480	SL3.0ch06	2375948	2377948	-	890	251	733	281	78.002	72.288	-5.71378	0.00803857	-1.90936	-3.79544	1	1
Solyc06g008715	SL3.0ch06	2620185	2622185	+	787	125	660	180	86.294	78.571	-7.72243	0.000156812	0	-3.91086	1	1
Solyc06g008720	SL3.0ch06	2636997	2638997	-	1239	315	1115	424	79.73	72.45	-7.28009	1.99836e-05	0.188349	5.80461	0.566397	1
Solyc06g008750	SL3.0ch06	2665703	2667703	+	729	794	461	701	47.866	39.673	-8.19308	0.000157724	2.41363	-2.11402	0.136033	1
Solyc06g008820	SL3.0ch06	2759494	2761494	+	812	438	597	440	64.96	57.57	-7.39009	0.00162792	0.488949	4.80897	0.239813	1
Solyc06g008830	SL3.0ch06	2774501	2776501	+	369	456	260	417	44.727	38.405	-6.32255	0.0344492	0	-3.91086	1	1
Solyc06g008880	SL3.0ch06	2819456	2821456	+	398	477	306	633	45.486	32.588	-12.8979	2.86532e-07	-0.130524	6.2009	0.652124	1
Solyc06g008980	SL3.0ch06	2917157	2919157	+	635	177	513	217	78.202	70.274	-7.928	0.00205046	-3.34182	-1.3305	0.00641087	0.3663
Solyc06g009190	SL3.0ch06	3126764	3128764	+	759	959	621	952	44.179	39.479	-4.70058	0.0190821	-3.03831	4.61628	2.3424e-06	0.000881926
Solyc06g009200	SL3.0ch06	3142110	3144110	+	1503	108	1276	126	93.296	91.013	-2.28325	0.0473176	0	-3.7647	1	1
Solyc06g009220	SL3.0ch06	3152242	3154242	+	103	867	58	756	10.619	7.125	-3.49325	0.0274798	-0.100219	5.65767	0.752314	1
Solyc06g009225	SL3.0ch06	3193981	3195981	+	191	112	79	108	63.036	42.246	-20.7903	7.76918e-05	-0.345689	3.03629	0.425575	1
Solyc06g009290	SL3.0ch06	3256358	3258358	-	372	491	285	521	43.105	35.36	-7.74564	0.00515655	3.852	4.66726	0.00373502	0.261949
Solyc06g009370	SL3.0ch06	3293601	3295601	-	594	285	566	365	67.577	60.795	-6.78195	0.00957852	0	-3.91086	1	1
Solyc06g009375	SL3.0ch06	3293601	3295601	-	594	285	566	365	67.577	60.795	-6.78195	0.00957852	0	-3.91086	1	1
Solyc06g009390	SL3.0ch06	3314733	3316733	-	1161	349	926	345	76.887	72.856	-4.0314	0.0382786	0.230642	3.16843	0.595139	1
Solyc06g009450	SL3.0ch06	3382040	3384040	+	841	187	600	177	81.809	77.22	-4.58926	0.0425206	-1.91423	-3.87151	1	1
Solyc06g009533	SL3.0ch06	3537478	3539478	-	39	313	3	209	11.08	1.415	-9.66445	6.01922e-05	0	-3.91086	1	1
Solyc06g009550	SL3.0ch06	3538588	3540588	-	454	628	238	570	41.959	29.455	-12.5039	2.85123e-07	0	-3.91086	1	1
Solyc06g009693	SL3.0ch06	3638576	3640576	+	970	281	951	346	77.538	73.323	-4.21492	0.0367396	0	-3.91086	1	1
Solyc06g009863	SL3.0ch06	4061805	4063805	+	560	165	546	223	77.241	71.001	-6.24008	0.0193423	0	-3.91086	1	1
Solyc06g010010	SL3.0ch06	4700970	4702970	+	246	855	44	948	22.343	4.435	-17.9078	5.65042e-33	0	-3.91086	1	1
Solyc06g010200	SL3.0ch06	5420170	5422170	-	86	142	65	213	37.719	23.381	-14.338	0.00269002	0.131637	5.17033	0.648746	1
Solyc06g010240	SL3.0ch06	5433694	5435694	-	591	250	476	381	70.273	55.543	-14.7309	5.85407e-09	0.636778	-0.810521	0.527229	1
Solyc06g011410	SL3.0ch06	6809085	6811085	-	95	447	23	483	17.528	4.545	-12.9822	2.07025e-10	0	-3.91086	1	1
Solyc06g011560	SL3.0ch06	8109874	8111874	+	1115	140	985	182	88.845	84.404	-4.44017	0.00562354	0.710098	-0.0873443	0.371648	1
Solyc06g024340	SL3.0ch06	11288110	11290110	-	38396	6125	11592	2498	86.242	82.271	-3.97133	3.76331e-28	0.676272	-1.67517	0.607284	1
Solyc06g024240	SL3.0ch06	11609520	11611520	+	26646	3876	8520	1395	87.301	85.93	-1.37055	0.00224385	1.89793	-3.83438	1	1
Solyc06g024220	SL3.0ch06	11615740	11617740	+	32190	7286	10534	2615	81.543	80.113	-1.43066	0.00145887	0.0874712	-3.83587	1	1
Solyc06g018002	SL3.0ch06	15967535	15969535	+	498	199	298	179	71.449	62.474	-8.97527	0.00556859	0	-3.91086	1	1
Solyc06g030630	SL3.0ch06	20211033	20213033	+	289999	43870	67007	14382	86.86	82.329	-4.53081	2.18191e-229	0	-3.91086	1	1
Solyc06g030656	SL3.0ch06	20523416	20525416	+	212	36	100	35	85.484	74.074	-11.4098	0.0239336	0	-3.91086	1	1
Solyc06g033850	SL3.0ch06	23372145	23374145	+	1325	277	1075	369	82.709	74.446	-8.26313	3.59431e-07	0.617756	5.71997	0.370978	1
Solyc06g033940	SL3.0ch06	23517137	23519137	+	22	357	2	235	5.805	0.844	-4.96087	0.00452222	0	-3.91086	1	1
Solyc06g033950	SL3.0ch06	23517535	23519535	+	22	368	2	235	5.641	0.844	-4.79714	0.00716801	2.52926	-3.8387	0.6674	1
Solyc06g034160	SL3.0ch06	23813678	23815678	+	563	97	484	125	85.303	79.475	-5.82848	0.021782	0.201537	6.51737	0.455503	1
Solyc06g035420	SL3.0ch06	24397568	24399568	-	271	185	249	252	59.43	49.701	-9.72923	0.00960242	0	-3.91086	1	1
Solyc06g035720	SL3.0ch06	24911047	24913047	-	359	214	213	188	62.653	53.117	-9.5355	0.0117706	-0.867953	6.59251	0.0692377	1
Solyc06g035790	SL3.0ch06	25122934	25124934	+	344	514	209	483	40.093	30.202	-9.89093	0.000379206	-0.744413	2.26822	0.136046	1
Solyc06g036050	SL3.0ch06	25524853	25526853	-	1033	234	876	286	81.531	75.387	-6.14391	0.00124836	0.0860243	7.75174	0.79587	1
Solyc06g036060	SL3.0ch06	25525304	25527304	+	1495	113	1361	169	92.973	88.954	-4.01839	0.000584793	-0.254173	3.51067	0.522199	1
Solyc06g036080	SL3.0ch06	25570400	25572400	-	1137	529	849	497	68.247	63.076	-5.17152	0.0109272	0.112825	4.13827	0.725997	1
Solyc06g036240	SL3.0ch06	25800689	25802689	+	399	252	285	256	61.29	52.68	-8.6101	0.0108543	-2.53926	-1.87844	0.0858735	1
Solyc06g036232	SL3.0ch06	25801853	25803853	+	41	45	6	99	47.674	5.714	-41.9601	2.50424e-10	0	-3.91086	1	1
Solyc06g036440	SL3.0ch06	26076782	26078782	+	526	913	325	839	36.553	27.921	-8.6322	2.62731e-05	-1.46072	-1.00626	0.345151	1
Solyc06g036470	SL3.0ch06	26186637	26188637	+	954	312	247	293	75.355	45.741	-29.6147	3.26826e-31	0	-3.91086	1	1
Solyc06g036500	SL3.0ch06	26232829	26234829	+	335	497	235	477	40.264	33.006	-7.25881	0.0118094	0	-3.91086	1	1
Solyc06g043160	SL3.0ch06	29764532	29766532	+	866	497	639	484	63.536	56.901	-6.63516	0.00351035	0	-3.91086	1	1
Solyc06g030660	SL3.0ch06	30873416	30875416	-	303	61	121	50	83.242	70.76	-12.4815	0.00507452	0	-3.91086	1	1
Solyc06g048450	SL3.0ch06	31142453	31144453	+	46	81	22	119	36.22	15.603	-20.6176	0.000728213	0.737727	1.86145	0.320563	1
Solyc06g048717	SL3.0ch06	31622673	31624673	+	1063	1062	735	872	50.024	45.737	-4.28613	0.026774	0	-3.75027	1	1
Solyc06g049090	SL3.0ch06	32454264	32456264	-	46	216	9	103	17.557	8.036	-9.52154	0.0408964	-0.0597604	1.76853	0.909591	1
Solyc06g050270	SL3.0ch06	32920424	32922424	-	217	607	177	796	26.335	18.191	-8.14379	0.000238531	0.271443	0.399707	0.713622	1
Solyc06g050290	SL3.0ch06	32937879	32939879	-	367	1028	218	914	26.308	19.258	-7.05029	0.000196687	0.379279	-0.999871	0.692471	1
Solyc06g050330	SL3.0ch06	33036724	33038724	-	604	33	320	36	94.819	89.888	-4.93183	0.0132348	2.62643	-3.57528	0.604942	1
Solyc06g050700	SL3.0ch06	33553927	33555927	+	1181	294	848	272	80.068	75.714	-4.35351	0.0232681	1.78783	-3.7225	1	1
Solyc06g050715	SL3.0ch06	33557607	33559607	-	1296	144	1396	206	90	87.141	-2.85893	0.0360613	0	-3.91086	1	1
Solyc06g050730	SL3.0ch06	33589090	33591090	-	235	356	206	458	39.763	31.024	-8.73902	0.00529816	0.295937	3.48045	0.39344	1
Solyc06g050770	SL3.0ch06	33640198	33642198	-	676	93	581	136	87.906	81.032	-6.87429	0.001526	0.10899	7.6291	0.667397	1
Solyc06g050850	SL3.0ch06	33772541	33774541	+	443	659	198	577	40.2	25.548	-14.6512	6.71876e-10	0	-3.91086	1	1
Solyc06g050900	SL3.0ch06	33850592	33852592	+	28	523	9	433	5.082	2.036	-3.04547	0.0303369	-2.90571	-1.25508	0.0520211	1
Solyc06g051260	SL3.0ch06	34577531	34579531	+	383	629	249	547	37.846	31.281	-6.56444	0.0127455	-0.508176	3.28147	0.482183	1
Solyc06g051550	SL3.0ch06	35149857	35151857	-	441	233	397	305	65.43	56.553	-8.87756	0.00321903	0	-3.91086	1	1
Solyc06g051600	SL3.0ch06	35219018	35221018	-	583	40	503	58	93.579	89.661	-3.91814	0.0377457	0	-3.91086	1	1
Solyc06g051665	SL3.0ch06	35300085	35302085	-	1275	165	1122	193	88.542	85.323	-3.21847	0.0324369	0	-3.91086	1	1
Solyc06g051760	SL3.0ch06	35464928	35466928	-	798	36	730	62	95.683	92.172	-3.51174	0.0111765	-0.0838484	5.05526	0.75105	1
Solyc06g051815	SL3.0ch06	35589486	35591486	-	126	551	69	500	18.612	12.127	-6.48498	0.00639306	0.199941	3.10502	0.613908	1
Solyc06g051970	SL3.0ch06	35736606	35738606	-	388	448	262	497	46.411	34.519	-11.8924	1.44396e-05	-1.46485	-1.32011	0.350321	1
Solyc06g052020	SL3.0ch06	35770540	35772540	-	34	624	11	501	5.167	2.148	-3.01874	0.0240197	-0.312866	-1.77326	1	1
Solyc06g052050	SL3.0ch06	35800340	35802340	+	731	582	547	541	55.674	50.276	-5.39829	0.0238813	-0.399918	2.21775	0.481706	1
Solyc06g052080	SL3.0ch06	35844401	35846401	+	651	868	483	776	42.857	38.364	-4.49336	0.0429352	-0.188918	5.02838	0.533647	1
Solyc06g053150	SL3.0ch06	35970172	35972172	-	738	245	650	290	75.076	69.149	-5.92736	0.0137661	0.963026	2.12086	0.179561	1
Solyc06g053300	SL3.0ch06	36121175	36123175	-	803	335	700	379	70.562	64.875	-5.68751	0.0149599	-0.0238162	5.56956	0.92924	1
Solyc06g053590	SL3.0ch06	36486749	36488749	+	941	385	777	393	70.965	66.41	-4.55505	0.0378526	0.174059	6.12953	0.61866	1
Solyc06g053820	SL3.0ch06	36770593	36772593	+	932	1192	563	922	43.879	37.912	-5.96701	0.00170861	0.0707828	5.66441	0.826575	1
Solyc06g054160	SL3.0ch06	37064605	37066605	-	259	367	201	384	41.374	34.359	-7.01483	0.0330334	0	-3.91086	1	1
Solyc06g054170	SL3.0ch06	37071720	37073720	-	463	295	430	350	61.082	55.128	-5.95359	0.0466722	0	-3.91086	1	1
Solyc06g054180	SL3.0ch06	37080593	37082593	-	1028	304	836	348	77.177	70.608	-6.56907	0.000971979	0	-3.91086	1	1
Solyc06g054190	SL3.0ch06	37128905	37130905	-	602	244	438	292	71.158	60	-11.1584	2.92128e-05	0	-3.91086	1	1
Solyc06g054210	SL3.0ch06	37141922	37143922	-	1671	247	1108	237	87.122	82.379	-4.74282	0.0010856	0	-3.91086	1	1
Solyc06g054220	SL3.0ch06	37154362	37156362	+	513	512	301	424	50.049	41.517	-8.53154	0.00211447	0.532061	2.41457	0.301494	1
Solyc06g054230	SL3.0ch06	37166155	37168155	-	868	505	591	708	63.219	45.497	-17.7227	1.73173e-18	3.54249	-2.52211	0.238145	1
Solyc06g054610	SL3.0ch06	37445497	37447497	-	78	598	33	506	11.538	6.122	-5.41601	0.00492683	0.550716	1.82692	0.337428	1
Solyc06g054620	SL3.0ch06	37451898	37453898	-	60	1303	39	1431	4.402	2.653	-1.74899	0.0345694	-0.215741	0.882617	0.749077	1
Solyc06g054650	SL3.0ch06	37536229	37538229	-	220	736	138	749	23.013	15.558	-7.45449	0.000363641	0.158543	5.29609	0.534379	1
Solyc06g059720	SL3.0ch06	37699853	37701853	-	1211	177	1419	343	87.248	80.533	-6.71435	4.78084e-06	4.86168	3.69572	9.14544e-05	0.0179733
Solyc06g059790	SL3.0ch06	37804509	37806509	+	723	473	586	492	60.452	54.36	-6.09158	0.0112163	0	-3.91086	1	1
Solyc06g059820	SL3.0ch06	37837071	37839071	+	200	1296	107	1021	13.369	9.486	-3.88317	0.00770548	0	-3.91086	1	1
Solyc06g060017	SL3.0ch06	38070432	38072432	+	775	228	709	281	77.268	71.616	-5.65203	0.0129109	-0.511276	-0.52657	0.557178	1
Solyc06g060120	SL3.0ch06	38186514	38188514	-	1002	185	1033	281	84.414	78.615	-5.79957	0.00108958	0.426998	5.78293	0.272293	1
Solyc06g060190	SL3.0ch06	38267822	38269822	-	487	416	323	513	53.931	38.636	-15.295	3.70866e-09	0	-3.76162	1	1
Solyc06g060380	SL3.0ch06	38488557	38490557	+	2000	211	1759	286	90.457	86.015	-4.44214	5.43886e-05	-0.0187307	3.51129	0.966114	1
Solyc06g060710	SL3.0ch06	38843408	38845408	+	339	648	235	578	34.347	28.905	-5.44122	0.0366986	-0.626179	1.04107	0.387638	1
Solyc06g060970	SL3.0ch06	39067903	39069903	-	494	616	325	592	44.505	35.442	-9.06285	0.000228495	-0.522028	-2.98828	0.780046	1
Solyc06g060990	SL3.0ch06	39077927	39079927	+	561	308	434	425	64.557	50.524	-14.0331	5.79952e-08	0.0272713	4.78584	0.924978	1
Solyc06g061055	SL3.0ch06	39209217	39211217	-	1331	289	1102	406	82.16	73.077	-9.08357	1.95586e-08	0.283318	5.31784	0.353433	1
Solyc06g061220	SL3.0ch06	39337334	39339334	+	115	549	47	390	17.319	10.755	-6.56413	0.0102314	0	-3.91086	1	1
Solyc06g061230	SL3.0ch06	39344840	39346840	+	553	443	343	446	55.522	43.473	-12.0493	4.51154e-06	1.28717	-0.362339	0.348307	1
Solyc06g062280	SL3.0ch06	39399632	39401632	+	1140	196	878	236	85.329	78.815	-6.51426	0.000209375	-0.0272698	6.57665	0.921981	1
Solyc06g062420	SL3.0ch06	39490001	39492001	-	795	899	312	650	46.93	32.432	-14.4979	7.47107e-12	2.67599	2.72171	0.0248552	0.748965
Solyc06g062820	SL3.0ch06	39752801	39754801	-	599	896	455	840	40.067	35.135	-4.93175	0.022007	-5.71222	-3.27213	0.120286	1
Solyc06g062880	SL3.0ch06	39799230	39801230	+	842	217	588	207	79.509	73.962	-5.54671	0.0160056	-3.96946	-3.72158	0.380582	1
Solyc06g062910	SL3.0ch06	39822714	39824714	-	120	443	22	268	21.314	7.586	-13.7282	1.34258e-06	0.0627258	1.71318	0.914962	1
Solyc06g062930	SL3.0ch06	39839632	39841632	-	284	713	239	762	28.485	23.876	-4.60933	0.0454162	-3.40399	-3.69623	0.38359	1
Solyc06g063160	SL3.0ch06	40011994	40013994	+	519	707	490	873	42.333	35.95	-6.38268	0.00385021	-0.408117	-1.84224	0.716804	1
Solyc06g063220	SL3.0ch06	40049369	40051369	-	1109	184	853	245	85.77	77.687	-8.08283	3.67959e-06	0.330153	5.82741	0.288025	1
Solyc06g063230	SL3.0ch06	40049628	40051628	+	1162	231	902	279	83.417	76.376	-7.04113	7.34653e-05	-0.237685	5.04754	0.432263	1
Solyc06g063380	SL3.0ch06	40171127	40173127	-	205	505	139	485	28.873	22.276	-6.5976	0.0201366	0	-3.91086	1	1
Solyc06g064430	SL3.0ch06	40237800	40239800	-	579	1022	358	980	36.165	26.756	-9.40854	6.32256e-07	0.0132331	2.66282	0.974807	1
Solyc06g064440	SL3.0ch06	40244345	40246345	-	86	345	48	334	19.954	12.565	-7.38815	0.0176223	-0.816869	3.07978	0.0599922	1
Solyc06g064700	SL3.0ch06	40447218	40449218	-	850	157	492	198	84.409	71.304	-13.1048	2.59155e-09	0	-3.91086	1	1
Solyc06g064710	SL3.0ch06	40446633	40448633	+	945	185	669	225	83.628	74.832	-8.7961	1.12957e-05	0	-3.91086	1	1
Solyc06g064760	SL3.0ch06	40478584	40480584	+	243	487	147	403	33.288	26.727	-6.5604	0.0311923	-1.62509	-3.33624	0.350831	1
Solyc06g064810	SL3.0ch06	40496194	40498194	+	182	322	64	316	36.111	16.842	-19.269	2.77258e-09	0.0423943	3.6215	0.910082	1
Solyc06g064940	SL3.0ch06	40610129	40612129	-	418	393	291	373	51.541	43.825	-7.71601	0.0111368	-0.293845	6.06121	0.371089	1
Solyc06g064960	SL3.0ch06	40622594	40624594	+	1107	219	476	170	83.484	73.684	-9.79995	5.18622e-06	0	-3.91086	1	1
Solyc06g064980	SL3.0ch06	40639451	40641451	+	937	570	296	404	62.177	42.286	-19.8908	9.69739e-17	-1.43544	-2.14146	0.581234	1
Solyc06g065020	SL3.0ch06	40662546	40664546	-	46	811	7	341	5.368	2.011	-3.35607	0.0231102	0.618267	7.31331	0.070786	1
Solyc06g065055	SL3.0ch06	40689303	40691303	-	155	583	67	413	21.003	13.958	-7.04438	0.0067337	0	-3.91086	1	1
Solyc06g065060	SL3.0ch06	40692517	40694517	-	349	162	83	69	68.297	54.605	-13.6922	0.00896016	1.89786	-0.954783	1	1
Solyc06g065130	SL3.0ch06	40740414	40742414	+	31	447	0	126	6.485	0	-6.48536	0.00400815	0	-3.91086	1	1
Solyc06g065210	SL3.0ch06	40782033	40784033	-	529	940	307	782	36.011	28.191	-7.81989	0.000196412	-0.352415	4.40782	0.254379	1
Solyc06g065215	SL3.0ch06	40781731	40783731	-	83	1481	32	1123	5.307	2.771	-2.53634	0.00412674	-3.64391	-3.65972	0.330977	1
Solyc06g065250	SL3.0ch06	40804631	40806631	-	1130	929	562	752	54.881	42.77	-12.1108	1.59152e-10	0	-3.91086	1	1
Solyc06g065255	SL3.0ch06	40805382	40807382	-	1269	725	585	550	63.641	51.542	-12.0991	8.89933e-10	0	-3.91086	1	1
Solyc06g065260	SL3.0ch06	40812888	40814888	+	454	492	371	537	47.992	40.859	-7.13251	0.00739922	0.145742	5.52479	0.731508	1
Solyc06g065280	SL3.0ch06	40831972	40833972	-	302	666	66	339	31.198	16.296	-14.9021	7.96041e-08	0	-3.91086	1	1
Solyc06g065290	SL3.0ch06	40831805	40833805	+	302	707	66	371	29.931	15.103	-14.8276	1.9173e-08	0.592952	4.04143	0.101924	1
Solyc06g065300	SL3.0ch06	40841467	40843467	-	103	362	30	300	22.151	9.091	-13.0596	6.98726e-06	5.31347	-2.71965	0.0102072	0.483139
Solyc06g065305	SL3.0ch06	40842272	40844272	-	111	551	32	393	16.767	7.529	-9.23796	6.54675e-05	2.61882	-3.42452	0.659048	1
Solyc06g065310	SL3.0ch06	40847506	40849506	-	265	211	64	264	55.672	19.512	-36.1601	1.02685e-23	-0.11152	2.06806	0.813257	1
Solyc06g065345	SL3.0ch06	40881942	40883942	+	218	617	80	355	26.108	18.391	-7.71698	0.00760976	1.4218	-3.43336	0.814304	1
Solyc06g065360	SL3.0ch06	40881942	40883942	+	218	617	80	355	26.108	18.391	-7.71698	0.00760976	-0.0358463	3.79121	0.93295	1
Solyc06g065440	SL3.0ch06	40962082	40964082	+	66	331	11	156	16.625	6.587	-10.0379	0.00464384	-0.524201	3.74279	0.280517	1
Solyc06g065510	SL3.0ch06	41008509	41010509	+	22	591	0	135	3.589	0	-3.58891	0.0485075	0.363736	2.89845	0.412076	1
Solyc06g065520	SL3.0ch06	41022463	41024463	-	1064	339	606	274	75.837	68.864	-6.97385	0.0013692	0.245234	6.68106	0.341364	1
Solyc06g065600	SL3.0ch06	41096558	41098558	+	985	271	708	278	78.424	71.805	-6.61829	0.00173803	0	-3.91086	1	1
Solyc06g065690	SL3.0ch06	41233402	41235402	-	724	322	397	275	69.216	59.077	-10.1387	0.000141907	-1.93551	3.06566	0.00234138	0.194307
Solyc06g065730	SL3.0ch06	41281256	41283256	+	195	628	21	316	23.694	6.231	-17.4623	2.66797e-12	-0.00158683	5.7549	0.996658	1
Solyc06g065800	SL3.0ch06	41357439	41359439	-	1031	224	459	250	82.151	64.739	-17.4123	5.85922e-16	0.289039	2.77912	0.563359	1
Solyc06g065790	SL3.0ch06	41349576	41351576	+	464	152	1	61	75.325	1.613	-73.7118	1.0964e-30	0	-3.91086	1	1
Solyc06g065825	SL3.0ch06	41377580	41379580	-	256	167	67	369	60.52	15.367	-45.1531	5.73196e-42	1.10865	4.85633	0.000403578	0.0532664
Solyc06g065870	SL3.0ch06	41404198	41406198	+	566	1083	217	769	34.324	22.008	-12.3157	3.08719e-10	-2.60105	-2.72804	0.201252	1
Solyc06g065900	SL3.0ch06	41414008	41416008	+	352	782	74	655	31.041	10.151	-20.8897	8.30369e-26	0.672496	6.61548	0.0306821	0.815371
Solyc06g065970	SL3.0ch06	41468021	41470021	+	784	545	279	436	58.992	39.021	-19.9707	2.65522e-16	-1.91626	0.442754	0.0517793	1
Solyc06g066020	SL3.0ch06	41490808	41492808	+	869	204	400	269	80.988	59.791	-21.1972	5.8555e-20	-0.515636	0.417578	0.546166	1
Solyc06g066070	SL3.0ch06	41534200	41536200	+	27	469	6	294	5.444	2	-3.44355	0.0416387	0.974654	-2.09974	0.420411	1
Solyc06g066150	SL3.0ch06	41589704	41591704	-	169	453	95	389	27.17	19.628	-7.54232	0.0116947	0	-3.91086	1	1
Solyc06g084820	SL3.0ch06	41685591	41687591	+	354	658	68	294	34.98	18.785	-16.1957	6.62009e-08	0	-3.91086	1	1
Solyc06g066290	SL3.0ch06	41701334	41703334	+	191	610	3	251	23.845	1.181	-22.6641	6.18691e-20	0.583625	2.7976	0.168103	1
Solyc06g066310	SL3.0ch06	41715676	41717676	-	1384	539	45	221	71.971	16.917	-55.0536	3.15295e-65	0.113434	4.22928	0.794747	1
Solyc06g066330	SL3.0ch06	41727365	41729365	+	587	237	289	197	71.238	59.465	-11.7728	0.000112449	0.600668	7.01126	0.0886224	1
Solyc06g066360	SL3.0ch06	41789100	41791100	-	262	596	110	486	30.536	18.456	-12.0798	2.08471e-06	2.64461	-0.390669	0.164179	1
Solyc06g066370	SL3.0ch06	41786775	41788775	+	110	759	18	284	12.658	5.96	-6.69796	0.00364949	0.30511	7.91365	0.551784	1
Solyc06g066390	SL3.0ch06	41793925	41795925	+	109	581	13	249	15.797	4.962	-10.8353	1.97296e-05	0	-3.91086	1	1
Solyc06g066430	SL3.0ch06	41820541	41822541	-	703	417	462	417	62.768	52.56	-10.2081	3.9611e-05	0.353513	3.59111	0.499177	1
Solyc06g066510	SL3.0ch06	41867724	41869724	-	323	263	105	124	55.119	45.852	-9.26793	0.0452218	0	-3.91086	1	1
Solyc06g066520	SL3.0ch06	41891939	41893939	-	183	302	45	222	37.732	16.854	-20.878	1.84958e-08	1.01056	2.88307	0.058002	1
Solyc06g066540	SL3.0ch06	41914828	41916828	-	40	710	17	673	5.333	2.464	-2.86957	0.0188535	-0.640517	1.13162	0.386875	1
Solyc06g066610	SL3.0ch06	41981556	41983556	-	307	707	186	559	30.276	24.966	-5.30969	0.0383989	0.381011	6.05451	0.171218	1
Solyc06g066680	SL3.0ch06	42015393	42017393	-	1008	1136	507	826	47.015	38.035	-8.98042	2.51743e-06	-0.261294	2.32489	0.704141	1
Solyc06g066770	SL3.0ch06	42067187	42069187	-	1510	963	410	680	61.059	37.615	-23.4448	2.74367e-36	-0.823129	4.40954	0.0588772	1
Solyc06g066795	SL3.0ch06	42102393	42104393	-	745	473	433	429	61.166	50.232	-10.9338	7.60396e-06	0	-3.91086	1	1
Solyc06g066800	SL3.0ch06	42101893	42103893	+	1040	559	628	423	65.041	59.753	-5.28803	0.019469	0.377999	6.04588	0.57001	1
Solyc06g066810	SL3.0ch06	42112331	42114331	-	1525	175	448	114	89.706	79.715	-9.99058	6.03394e-08	-0.23353	4.61783	0.420759	1
Solyc06g066830	SL3.0ch06	42166415	42168415	-	55	588	5	452	8.554	1.094	-7.45956	1.16946e-07	0	-3.91086	1	1
Solyc06g066850	SL3.0ch06	42157225	42159225	-	1231	117	486	105	91.32	82.234	-9.08697	3.52778e-07	0	-3.91086	1	1
Solyc06g066860	SL3.0ch06	42169979	42171979	-	731	175	366	188	80.684	66.065	-14.6193	9.74384e-09	0	-3.91086	1	1
Solyc06g067975	SL3.0ch06	42248032	42250032	-	306	763	184	813	28.625	18.455	-10.1695	6.53163e-07	0.154324	0.913506	0.781985	1
Solyc06g068000	SL3.0ch06	42266020	42268020	+	138	265	3	84	34.243	3.448	-30.7949	1.72653e-09	0	-3.91086	1	1
Solyc06g068050	SL3.0ch06	42284667	42286667	+	231	475	140	410	32.72	25.455	-7.265	0.0156356	0.679832	4.8627	0.0349565	0.874353
Solyc06g068060	SL3.0ch06	42305181	42307181	-	369	1327	105	887	21.757	10.585	-11.1724	1.80566e-12	1.00071	5.72416	0.000763619	0.0878236
Solyc06g068080	SL3.0ch06	42310965	42312965	-	789	652	355	645	54.754	35.5	-19.2536	2.90558e-19	0.105114	5.1687	0.731208	1
Solyc06g068090	SL3.0ch06	42311846	42313846	+	438	1133	220	984	27.88	18.272	-9.60791	5.27144e-08	0.121872	7.49823	0.684567	1
Solyc06g068100	SL3.0ch06	42321799	42323799	+	970	467	784	482	67.502	61.927	-5.57441	0.00959707	0	-3.91086	1	1
Solyc06g068130	SL3.0ch06	42343695	42345695	+	2000	451	1510	461	81.599	76.611	-4.98849	0.000330688	-1.52439	2.67017	0.110527	1
Solyc06g068180	SL3.0ch06	42362342	42364342	+	654	282	399	335	69.872	54.36	-15.5121	1.5945e-09	-0.584557	0.160479	0.35897	1
Solyc06g068200	SL3.0ch06	42370594	42372594	-	234	717	50	627	24.606	7.386	-17.2202	3.13971e-19	3.49772	-1.87209	0.00372078	0.261463
Solyc06g068215	SL3.0ch06	42376746	42378746	-	301	238	102	202	55.844	33.553	-22.2915	9.5792e-09	-0.066385	-1.14881	0.971152	1
Solyc06g068220	SL3.0ch06	42375751	42377751	+	305	791	99	350	27.828	22.049	-5.77947	0.0495046	-0.310082	5.36227	0.408561	1
Solyc06g068240	SL3.0ch06	42412541	42414541	+	484	631	240	490	43.408	32.877	-10.5314	4.63329e-05	1.26285	3.64812	0.00163356	0.152159
Solyc06g068280	SL3.0ch06	42430991	42432991	-	234	997	16	451	19.009	3.426	-15.5828	1.13599e-17	0.192759	5.02507	0.499216	1
Solyc06g068320	SL3.0ch06	42444476	42446476	-	715	934	0	30	43.36	0	-43.3596	6.67692e-07	0.213384	7.59188	0.402074	1
Solyc06g068340	SL3.0ch06	42452134	42454134	+	753	933	267	532	44.662	33.417	-11.2452	1.14957e-06	0.199156	-2.68193	0.910043	1
Solyc06g068370	SL3.0ch06	42472643	42474643	+	279	346	90	213	44.64	29.703	-14.937	9.21534e-05	0.174376	2.53733	0.723561	1
Solyc06g068410	SL3.0ch06	42496803	42498803	-	1195	248	635	192	82.814	76.784	-6.03003	0.00270747	0.253772	5.14728	0.370642	1
Solyc06g068420	SL3.0ch06	42500552	42502552	-	328	646	16	176	33.676	8.333	-25.3422	7.18258e-13	0	-3.91086	1	1
Solyc06g068430	SL3.0ch06	42501218	42503218	+	85	625	4	147	11.972	2.649	-9.32282	0.00100545	0	-3.91086	1	1
Solyc06g068470	SL3.0ch06	42556576	42558576	-	1364	208	666	184	86.768	78.353	-8.41551	1.51626e-06	-0.474985	3.48236	0.236031	1
Solyc06g068460	SL3.0ch06	42548569	42550569	+	190	741	77	503	20.408	13.276	-7.1323	0.0018611	-0.106669	8.34008	0.770021	1
Solyc06g068510	SL3.0ch06	42581183	42583183	-	160	243	138	349	39.702	28.337	-11.3655	0.00174331	0.351159	1.30201	0.531534	1
Solyc06g068560	SL3.0ch06	42613881	42615881	-	803	516	611	520	60.879	54.023	-6.85647	0.00288711	0.396634	3.19623	0.266534	1
Solyc06g068640	SL3.0ch06	42674036	42676036	-	169	809	80	708	17.28	10.152	-7.12788	0.000131638	0	-3.91086	1	1
Solyc06g068880	SL3.0ch06	42823958	42825958	-	423	479	404	580	46.896	41.057	-5.83888	0.0314995	0.302414	5.58063	0.346172	1
Solyc06g068950	SL3.0ch06	42889962	42891962	+	674	228	531	258	74.723	67.3	-7.42246	0.00351035	-1.13346	4.07073	0.0462728	0.978183
Solyc06g068960	SL3.0ch06	42896781	42898781	+	432	399	369	462	51.986	44.404	-7.58123	0.00823108	-0.136523	2.0681	0.850763	1
Solyc06g069150	SL3.0ch06	43044564	43046564	+	159	686	117	724	18.817	13.912	-4.90456	0.0201069	-1.31025	2.5732	0.0611607	1
Solyc06g069280	SL3.0ch06	43164448	43166448	-	1157	242	909	243	82.702	78.906	-3.79568	0.0413273	0.206674	5.29227	0.477906	1
Solyc06g069385	SL3.0ch06	43261352	43263352	+	1112	245	876	260	81.945	77.113	-4.83279	0.0105529	-0.574693	5.44243	0.12111	1
Solyc06g069450	SL3.0ch06	43316000	43318000	+	308	564	334	791	35.321	29.689	-5.63221	0.0223253	0.107381	3.80131	0.816374	1
Solyc06g069565	SL3.0ch06	43440093	43442093	-	539	371	447	397	59.231	52.962	-6.26868	0.0254599	0.366969	2.10962	0.521191	1
Solyc06g069890	SL3.0ch06	43627607	43629607	+	219	238	172	267	47.921	39.18	-8.74127	0.0240589	0.173244	6.04986	0.592338	1
Solyc06g070960	SL3.0ch06	43715507	43717507	+	253	505	224	619	33.377	26.572	-6.80554	0.0105207	-0.754894	-1.83414	0.611595	1
Solyc06g071090	SL3.0ch06	43807724	43809724	+	330	91	333	190	78.385	63.671	-14.7137	9.77923e-06	1.02085	-1.30991	0.479479	1
Solyc06g071310	SL3.0ch06	44020632	44022632	+	1130	1028	1071	1121	52.363	48.859	-3.50381	0.0487057	-0.0239788	3.74617	0.955887	1
Solyc06g071337	SL3.0ch06	44044415	44046415	+	1198	558	662	745	68.223	47.05	-21.1728	2.9782e-31	0.0062266	0.176702	1	1
Solyc06g071460	SL3.0ch06	44104659	44106659	+	216	795	195	942	21.365	17.15	-4.21459	0.0342413	-0.192892	1.94661	0.729939	1
Solyc06g071470	SL3.0ch06	44104659	44106659	+	216	795	195	942	21.365	17.15	-4.21459	0.0342413	0.0207319	8.15085	0.936593	1
Solyc06g071500	SL3.0ch06	44160808	44162808	+	645	939	530	918	40.72	36.602	-4.11749	0.0479384	-0.457336	6.17058	0.277475	1
Solyc06g071580	SL3.0ch06	44205172	44207172	+	302	259	197	389	53.832	33.618	-20.2147	1.41065e-10	2.74568	2.91116	2.03225e-06	0.000790104
Solyc06g071850	SL3.0ch06	44400730	44402730	+	1441	707	1138	659	67.086	63.328	-3.75789	0.0356645	-0.116385	4.65046	0.671691	1
Solyc06g071960	SL3.0ch06	44470342	44472342	-	1118	747	919	734	59.946	55.596	-4.35049	0.0255685	-0.593455	4.39953	0.103154	1
Solyc06g072210	SL3.0ch06	44643066	44645066	-	306	591	178	488	34.114	26.727	-7.38699	0.00707097	0	-3.91086	1	1
Solyc06g072320	SL3.0ch06	44746067	44748067	-	162	463	106	520	25.92	16.933	-8.98709	0.000628001	0	-3.91086	1	1
Solyc06g072370	SL3.0ch06	44786257	44788257	-	191	231	140	276	45.261	33.654	-11.6068	0.00297462	0.010777	2.30384	0.984102	1
Solyc06g072590	SL3.0ch06	44912837	44914837	-	78	289	40	252	21.253	13.699	-7.55478	0.0351412	0	-3.91086	1	1
Solyc06g072600	SL3.0ch06	44911617	44913617	+	209	267	79	266	43.908	22.899	-21.009	6.9861e-09	0.283855	4.24426	0.454462	1
Solyc06g072720	SL3.0ch06	44994502	44996502	-	1788	276	1591	330	86.628	82.821	-3.80646	0.00379756	-0.0177443	4.55648	0.95205	1
Solyc06g072890	SL3.0ch06	45083684	45085684	+	639	534	577	653	54.476	46.911	-7.56513	0.001217	-0.858316	-2.7532	0.539459	1
Solyc06g073055	SL3.0ch06	45158823	45160823	-	120	742	26	374	13.921	6.5	-7.42111	0.000539949	-0.849309	-1.51035	0.538255	1
Solyc06g073150	SL3.0ch06	45210958	45212958	-	36	444	18	529	7.5	3.291	-4.20932	0.0102522	0.242072	2.76403	0.549489	1
Solyc06g073180	SL3.0ch06	45228968	45230968	+	1718	180	1655	226	90.516	87.985	-2.53122	0.0342532	-0.71594	5.33281	0.0768803	1
Solyc06g073790	SL3.0ch06	45692143	45694143	-	218	273	182	373	44.399	32.793	-11.6064	0.000714733	0.180219	6.74327	0.562755	1
Solyc06g074060	SL3.0ch06	45922157	45924157	+	181	1150	113	996	13.599	10.189	-3.40944	0.0279551	3.37054	-3.77034	0.53032	1
Solyc06g074260	SL3.0ch06	46048670	46050670	-	120	293	43	181	29.056	19.196	-9.85926	0.0217151	-0.433082	7.19465	0.302441	1
Solyc06g074390	SL3.0ch06	46154976	46156976	+	192	735	144	733	20.712	16.42	-4.29236	0.0491542	-4.48117	-0.018724	4.62833e-05	0.0108388
Solyc06g074670	SL3.0ch06	46354335	46356335	-	253	813	208	914	23.734	18.538	-5.19526	0.0109382	-0.125601	6.82238	0.864768	1
Solyc06g074960	SL3.0ch06	46616607	46618607	-	431	678	367	719	38.864	33.794	-5.0701	0.0365701	-0.0203517	4.57545	0.945382	1
Solyc06g075090	SL3.0ch06	46730536	46732536	+	477	217	333	260	68.732	56.155	-12.5768	3.00852e-05	1.65566	-3.45644	0.624915	1
Solyc06g075170	SL3.0ch06	46796432	46798432	-	763	558	685	621	57.759	52.45	-5.30904	0.0197928	-0.259937	2.75938	0.622037	1
Solyc06g075340	SL3.0ch06	46912243	46914243	-	76	1011	34	913	6.992	3.59	-3.40144	0.00328201	0.136687	6.707	0.644422	1
Solyc06g075345	SL3.0ch06	46912437	46914437	+	76	828	41	826	8.407	4.729	-3.67813	0.00756442	-0.397783	-0.455426	0.661714	1
Solyc06g075360	SL3.0ch06	46920952	46922952	-	53	641	34	753	7.637	4.32	-3.31668	0.0218441	-0.0116338	6.63103	0.972748	1
Solyc06g075590	SL3.0ch06	47117920	47119920	+	717	282	619	464	71.772	57.156	-14.6157	7.73308e-11	-0.103379	6.51051	0.68609	1
Solyc06g075710	SL3.0ch06	47188641	47190641	-	116	519	47	468	18.268	9.126	-9.1415	6.67872e-05	0	-3.87049	1	1
Solyc06g076050	SL3.0ch06	47363009	47365009	+	159	535	6	516	22.911	1.149	-21.7612	1.84781e-32	-0.139233	7.69723	0.751472	1
Solyc06g076310	SL3.0ch06	47551519	47553519	+	708	710	648	795	49.929	44.906	-5.02303	0.022196	-0.939445	-0.0411807	0.27636	1
Solyc06g076360	SL3.0ch06	47587414	47589414	-	707	61	678	97	92.057	87.484	-4.57342	0.0108344	-0.0479943	7.30903	0.873476	1
Solyc06g076600	SL3.0ch06	47714876	47716876	+	630	702	515	734	47.297	41.233	-6.06431	0.00724229	-0.00665834	-0.246758	1	1
Solyc06g076910	SL3.0ch06	47939509	47941509	-	601	471	497	493	56.063	50.202	-5.86141	0.0226685	-0.0481649	-1.9039	1	1
Solyc06g082020	SL3.0ch06	48013490	48015490	-	785	482	643	574	61.957	52.835	-9.12254	3.6935e-05	0	-3.91086	1	1
Solyc06g082155	SL3.0ch06	48104213	48106213	+	14	125	7	257	10.072	2.652	-7.42043	0.0112739	-0.241077	4.01866	0.471979	1
Solyc06g082500	SL3.0ch06	48340025	48342025	-	215	614	170	652	25.935	20.681	-5.2536	0.0319397	-0.601617	3.493	0.165906	1
Solyc06g083030	SL3.0ch06	48636188	48638188	-	287	894	181	797	24.301	18.507	-5.79428	0.00455012	-0.450917	0.766084	0.666079	1
Solyc06g083060	SL3.0ch06	48657667	48659667	-	81	298	24	282	21.372	7.843	-13.5289	6.81263e-06	0.308275	3.49137	0.407796	1
Solyc06g083130	SL3.0ch06	48718798	48720798	-	373	642	274	690	36.749	28.423	-8.32553	0.00049186	0.237977	-0.0525866	0.869478	1
Solyc06g083200	SL3.0ch06	48767240	48769240	-	1395	328	1199	380	80.963	75.934	-5.0293	0.00226102	0.225301	3.08947	0.575734	1
Solyc06g083300	SL3.0ch06	48805323	48807323	+	73	736	17	607	9.023	2.724	-6.29913	5.06047e-06	0.239108	8.13048	0.344932	1
Solyc06g083320	SL3.0ch06	48817787	48819787	+	128	760	110	999	14.414	9.919	-4.49557	0.00789735	3.59281	-3.62021	0.351791	1
Solyc06g083465	SL3.0ch06	48908116	48910116	-	88	849	72	1018	9.392	6.606	-2.78617	0.0481953	0.526396	5.8454	0.225554	1
Solyc06g083730	SL3.0ch06	49117897	49119897	+	215	815	133	745	20.874	15.148	-5.72572	0.0050843	0.13009	5.98667	0.663596	1
Solyc06g083990	SL3.0ch06	49308173	49310173	+	16	296	5	344	5.128	1.433	-3.69554	0.0213716	0.534181	3.46032	0.100579	1
Solyc06g084045	SL3.0ch06	49359359	49361359	+	458	293	366	404	60.985	47.532	-13.4529	1.71196e-06	0	-3.91086	1	1
Solyc06g084150	SL3.0ch06	49417220	49419220	-	174	597	110	540	22.568	16.923	-5.64502	0.0255749	4.16404	-3.68895	0.166296	1
Solyc06g084170	SL3.0ch06	49423122	49425122	+	507	1096	415	1142	31.628	26.654	-4.97438	0.00803062	0.808524	-0.847397	0.461546	1
Solyc06g084190	SL3.0ch06	49426084	49428084	+	21	796	4	532	2.57	0.746	-1.82411	0.0342536	-0.101534	5.45332	0.713123	1
Solyc06g084260	SL3.0ch06	49500788	49502788	+	327	697	130	653	31.934	16.603	-15.3308	1.57745e-12	-0.8175	3.6246	0.0849914	1
Solyc06g084483	SL3.0ch06	49629993	49631993	-	792	261	660	284	75.214	69.915	-5.29842	0.0244866	0.0437218	-1.49331	0.979006	1
Solyc06g084500	SL3.0ch06	49629993	49631993	-	792	261	660	284	75.214	69.915	-5.29842	0.0244866	-0.160202	-0.430085	0.857927	1
Solyc07g005280	SL3.0ch07	231516	233516	-	10	115	4	209	8	1.878	-6.12207	0.0259657	-0.0846543	0.680673	0.923759	1
Solyc07g005420	SL3.0ch07	321983	323983	+	295	640	178	524	31.551	25.356	-6.19468	0.0200634	2.57471	0.200524	0.000389824	0.0518336
Solyc07g005440	SL3.0ch07	340334	342334	-	69	447	42	537	13.372	7.254	-6.11821	0.00371881	-0.0900404	6.97604	0.815044	1
Solyc07g005570	SL3.0ch07	455802	457802	-	912	582	628	528	61.044	54.325	-6.71892	0.00247411	0.551392	5.19088	0.184455	1
Solyc07g005720	SL3.0ch07	591344	593344	+	455	384	359	396	54.231	47.55	-6.68156	0.022261	-0.127602	1.03534	0.840428	1
Solyc07g005730	SL3.0ch07	591413	593413	+	455	425	359	422	51.705	45.967	-5.73784	0.0481261	-0.0545762	6.53155	0.851181	1
Solyc07g005790	SL3.0ch07	647279	649279	-	69	439	36	396	13.583	8.333	-5.24934	0.0322032	-0.107108	3.49992	0.787153	1
Solyc07g005890	SL3.0ch07	737681	739681	-	532	437	448	597	54.902	42.871	-12.0311	1.00507e-06	0.190393	3.83794	0.560447	1
Solyc07g005900	SL3.0ch07	736871	738871	+	552	1136	469	1212	32.701	27.9	-4.80136	0.00933642	-0.221103	-2.33526	0.911075	1
Solyc07g006180	SL3.0ch07	1013181	1015181	-	112	288	98	479	28	16.984	-11.0156	0.00031543	0.124223	6.83575	0.664201	1
Solyc07g006260	SL3.0ch07	1053916	1055916	+	180	412	151	535	30.405	22.012	-8.39374	0.00297802	-0.0524102	4.06471	0.87162	1
Solyc07g006380	SL3.0ch07	1205357	1207357	+	1252	488	1058	519	71.954	67.089	-4.86461	0.00869814	5.11675	-3.44289	0.0483756	0.99729
Solyc07g006395	SL3.0ch07	1218693	1220693	-	299	120	192	149	71.36	56.305	-15.0554	0.000133104	0	-3.91086	1	1
Solyc07g006650	SL3.0ch07	1523093	1525093	-	301	214	265	253	58.447	51.158	-7.2883	0.047926	0.139547	7.64333	0.63136	1
Solyc07g006850	SL3.0ch07	1711291	1713291	+	195	367	92	326	34.698	22.01	-12.6879	0.000106755	0	-3.91086	1	1
Solyc07g006880	SL3.0ch07	1740103	1742103	+	244	783	147	740	23.759	16.573	-7.1858	0.000610563	0.738948	5.5892	0.0551047	1
Solyc07g006950	SL3.0ch07	1773622	1775622	+	144	282	116	322	33.803	26.484	-7.3188	0.0491516	0.0240415	3.65864	0.951435	1
Solyc07g006960	SL3.0ch07	1782114	1784114	-	514	677	434	705	43.157	38.104	-5.05341	0.0361217	0.0707917	3.99712	0.826771	1
Solyc07g007010	SL3.0ch07	1803063	1805063	-	86	255	19	120	25.22	13.669	-11.5509	0.0156988	0	-3.87049	1	1
Solyc07g007030	SL3.0ch07	1817037	1819037	-	270	647	109	605	29.444	15.266	-14.1777	2.6953e-10	-0.274502	6.6187	0.361316	1
Solyc07g007080	SL3.0ch07	1850577	1852577	+	44	421	3	201	9.462	1.471	-7.99178	0.000339219	0	-3.91086	1	1
Solyc07g007090	SL3.0ch07	1854046	1856046	-	48	794	8	465	5.701	1.691	-4.00938	0.00156234	0	-3.91086	1	1
Solyc07g007125	SL3.0ch07	1888396	1890396	+	206	710	114	543	22.489	17.352	-5.13748	0.0337971	2.04027	-2.03634	0.046324	0.978688
Solyc07g007200	SL3.0ch07	1946897	1948897	-	422	230	347	266	64.724	56.607	-8.11707	0.0109806	-0.236959	1.8894	0.689906	1
Solyc07g007370	SL3.0ch07	2104507	2106507	+	476	94	465	131	83.509	78.02	-5.48864	0.0488063	0.326066	5.17452	0.253376	1
Solyc07g007395	SL3.0ch07	2126687	2128687	+	45	1146	19	1067	3.778	1.75	-2.0288	0.0112445	0	-3.91086	1	1
Solyc07g007470	SL3.0ch07	2173000	2175000	+	897	204	741	218	81.471	77.268	-4.2034	0.0442298	0	-3.91086	1	1
Solyc07g007480	SL3.0ch07	2183090	2185090	-	142	517	112	630	21.548	15.094	-6.45346	0.00783611	0.132063	-2.8083	1	1
Solyc07g007550	SL3.0ch07	2219207	2221207	+	909	512	590	431	63.969	57.786	-6.18255	0.00756458	-0.887272	4.22314	0.082285	1
Solyc07g007810	SL3.0ch07	2456785	2458785	+	403	581	243	500	40.955	32.705	-8.25004	0.00237281	0.0515663	4.3831	0.860894	1
Solyc07g008010	SL3.0ch07	2711322	2713322	-	137	255	65	227	34.949	22.26	-12.6887	0.00173368	1.22929	-0.328052	0.211916	1
Solyc07g008150	SL3.0ch07	2858289	2860289	-	203	983	116	840	17.116	12.134	-4.98247	0.0056077	-0.0161353	4.70051	0.954002	1
Solyc07g008190	SL3.0ch07	2938227	2940227	-	452	234	389	301	65.889	56.377	-9.5124	0.00157378	0.0335936	5.06893	0.901861	1
Solyc07g008210	SL3.0ch07	2951283	2953283	-	832	970	549	852	46.171	39.186	-6.98463	0.000453272	-2.30259	5.93633	0.0289486	0.795875
Solyc07g008330	SL3.0ch07	3120655	3122655	-	459	568	526	800	44.693	39.668	-5.02511	0.0364504	0.42832	5.44008	0.121179	1
Solyc07g008500	SL3.0ch07	3428687	3430687	+	2125	223	104	387	90.503	21.181	-69.3213	4.36455e-210	-0.854299	-3.35537	1	1
Solyc07g008520	SL3.0ch07	3438421	3440421	+	1570	264	1443	322	85.605	81.756	-3.84886	0.0067337	1.20412	2.39757	0.0249174	0.749526
Solyc07g008530	SL3.0ch07	3456739	3458739	+	1969	305	724	154	86.588	82.46	-4.12737	0.0129312	0.211729	4.014	0.522582	1
Solyc07g008610	SL3.0ch07	3564073	3566073	+	382	1004	259	904	27.561	22.27	-5.29134	0.00769521	0.335473	6.93094	0.242017	1
Solyc07g008790	SL3.0ch07	3764483	3766483	+	17	62	1	71	21.519	1.389	-20.1301	0.000464807	0.296337	-1.5439	0.852467	1
Solyc07g008880	SL3.0ch07	3843867	3845867	+	1037	210	851	259	83.16	76.667	-6.49292	0.000495701	0.132695	7.99489	0.649244	1
Solyc07g008950	SL3.0ch07	3983028	3985028	-	824	404	745	446	67.101	62.552	-4.5485	0.0491303	0.0337263	7.42627	0.900044	1
Solyc07g008980	SL3.0ch07	4003505	4005505	+	211	261	117	269	44.703	30.311	-14.3925	0.000117405	0	-3.91086	1	1
Solyc07g009060	SL3.0ch07	4033345	4035345	-	421	211	313	216	66.614	59.168	-7.44568	0.0275478	0	-3.91086	1	1
Solyc07g009110	SL3.0ch07	4065954	4067954	+	451	608	332	656	42.587	33.603	-8.98411	0.000223027	0	-3.91086	1	1
Solyc07g014585	SL3.0ch07	4901357	4903357	-	830	169	473	137	83.083	77.541	-5.5421	0.0207021	0	-3.91086	1	1
Solyc07g014640	SL3.0ch07	4980915	4982915	+	458	705	328	714	39.381	31.478	-7.90298	0.00070187	-0.617482	3.03532	0.162935	1
Solyc07g015830	SL3.0ch07	5536036	5538036	-	553	165	550	256	77.019	68.238	-8.78129	0.000807469	0	-3.91086	1	1
Solyc07g015850	SL3.0ch07	5551862	5553862	-	883	267	633	273	76.783	69.868	-6.91506	0.00224102	0	-3.659	1	1
Solyc07g015940	SL3.0ch07	5836828	5838828	+	782	164	539	168	82.664	76.238	-6.42622	0.00578595	0	-3.91086	1	1
Solyc07g015960	SL3.0ch07	6049288	6051288	-	534	182	491	253	74.581	65.995	-8.58638	0.00181196	0	-3.91086	1	1
Solyc07g016120	SL3.0ch07	6301101	6303101	-	286	154	198	239	65	45.309	-19.6911	7.35135e-08	0	-3.91086	1	1
Solyc07g017343	SL3.0ch07	6849939	6851939	-	182	173	122	185	51.268	39.739	-11.5282	0.0122799	0	-3.91086	1	1
Solyc07g017433	SL3.0ch07	7049459	7051459	-	512	103	437	129	83.252	77.208	-6.04355	0.0275359	0	-3.91086	1	1
Solyc07g017470	SL3.0ch07	7225690	7227690	+	664	309	488	352	68.243	58.095	-10.1473	6.47392e-05	0	-3.91086	1	1
Solyc07g017490	SL3.0ch07	7367045	7369045	+	1992	226	1469	266	89.811	84.669	-5.14205	1.33574e-05	0.129957	6.8512	0.682863	1
Solyc07g017500	SL3.0ch07	7378969	7380969	+	1671	289	1607	343	85.255	82.41	-2.84485	0.040812	0.106604	6.52234	0.759886	1
Solyc07g017770	SL3.0ch07	7967351	7969351	+	964	140	744	146	87.319	83.596	-3.72333	0.0477738	-0.0790873	5.2008	0.801424	1
Solyc07g018000	SL3.0ch07	8768240	8770240	+	218	63	321	164	77.58	66.186	-11.3945	0.0040674	0.0143483	4.19871	0.974594	1
Solyc07g018020	SL3.0ch07	8852351	8854351	-	1013	58	868	78	94.585	91.755	-2.82974	0.0325426	0	-3.91086	1	1
Solyc07g018230	SL3.0ch07	9782281	9784281	+	758	620	623	614	55.007	50.364	-4.64347	0.0440032	0.214795	1.9231	0.651983	1
Solyc07g020830	SL3.0ch07	13962561	13964561	-	549	129	365	125	80.973	74.49	-6.48366	0.0261425	0	-3.91086	1	1
Solyc07g020850	SL3.0ch07	14165819	14167819	-	891	790	595	779	53.004	43.304	-9.69994	1.25738e-06	0	-3.91086	1	1
Solyc07g021150	SL3.0ch07	16356213	16358213	+	881	133	803	169	86.884	82.613	-4.27046	0.0239893	0	-3.91086	1	1
Solyc07g021750	SL3.0ch07	21302489	21304489	-	619	131	540	163	82.533	76.814	-5.71968	0.0210743	0.279567	6.3387	0.443261	1
Solyc07g025290	SL3.0ch07	27236495	27238495	-	218	179	125	185	54.912	40.323	-14.5893	0.000795041	0	-3.91086	1	1
Solyc07g025490	SL3.0ch07	28719328	28721328	-	348	31	364	57	91.821	86.461	-5.35977	0.0417116	0.212335	2.13619	0.703345	1
Solyc07g026607	SL3.0ch07	29720593	29722593	+	68	215	25	236	24.028	9.579	-14.4497	5.62244e-05	0	-3.86883	1	1
Solyc07g026620	SL3.0ch07	29720593	29722593	+	68	215	25	236	24.028	9.579	-14.4497	5.62244e-05	-0.0764943	5.37623	0.794674	1
Solyc07g026710	SL3.0ch07	30487940	30489940	+	654	173	176	310	79.081	36.214	-42.867	2.94255e-52	9.64444	0.806031	4.56901e-17	8.17121e-14
Solyc07g026770	SL3.0ch07	31133331	31135331	-	273	18	311	64	93.814	82.933	-10.8811	0.000112153	0.426433	7.71631	0.126859	1
Solyc07g032300	SL3.0ch07	37350066	37352066	-	957	109	1009	168	89.775	85.726	-4.04844	0.0123532	0	-3.91086	1	1
Solyc07g032680	SL3.0ch07	40881580	40883580	+	178	419	77	288	29.816	21.096	-8.71985	0.0109268	-0.81015	-3.7588	1	1
Solyc07g037940	SL3.0ch07	44346163	44348163	+	1290	96	1084	135	93.074	88.925	-4.14824	0.00122351	3.89656	-3.34624	0.400676	1
Solyc07g038170	SL3.0ch07	45622352	45624352	-	1030	370	962	427	73.571	69.258	-4.31297	0.0311569	0	-3.91086	1	1
Solyc07g039200	SL3.0ch07	45714672	45716672	+	1096	134	868	154	89.106	84.932	-4.17418	0.0115708	0.0430101	6.52765	0.873487	1
Solyc07g039220	SL3.0ch07	45905730	45907730	-	455	173	407	226	72.452	64.297	-8.15523	0.00728664	0	-3.91086	1	1
Solyc07g039635	SL3.0ch07	49161786	49163786	-	44	126	24	146	25.882	14.118	-11.7647	0.0262801	0	-3.91086	1	1
Solyc07g040770	SL3.0ch07	49818283	49820283	+	480	404	289	369	54.299	43.921	-10.3777	0.000361609	0.839129	-1.42169	0.555029	1
Solyc07g040900	SL3.0ch07	51118233	51120233	-	191	376	61	319	33.686	16.053	-17.6334	1.64335e-08	0.0649383	-2.95775	1	1
Solyc07g040920	SL3.0ch07	51166189	51168189	-	1439	286	1038	301	83.42	77.521	-5.89975	0.000287846	-0.00143731	3.69361	0.998252	1
Solyc07g041000	SL3.0ch07	51613473	51615473	-	918	571	678	549	61.652	55.257	-6.39539	0.00361817	-0.942984	-1.66802	0.510025	1
Solyc07g041245	SL3.0ch07	52293215	52295215	-	1163	143	353	163	89.051	68.411	-20.6397	1.99974e-22	0.0630184	1.75682	0.912018	1
Solyc07g041350	SL3.0ch07	52653842	52655842	-	161	438	47	341	26.878	12.113	-14.7647	2.3247e-07	0	-3.91086	1	1
Solyc07g041460	SL3.0ch07	53300040	53302040	+	1211	290	720	310	80.68	69.903	-10.7766	9.66652e-09	0	-3.91086	1	1
Solyc07g041627	SL3.0ch07	53716865	53718865	+	1218	285	1035	331	81.038	75.769	-5.26926	0.00279763	0	-3.91086	1	1
Solyc07g041850	SL3.0ch07	54358096	54360096	-	758	232	468	337	76.566	58.137	-18.429	3.60961e-15	0	-3.91086	1	1
Solyc07g041930	SL3.0ch07	54737374	54739374	+	486	363	202	349	57.244	36.661	-20.5832	1.55098e-12	-0.0687986	5.25093	0.806131	1
Solyc07g042270	SL3.0ch07	55522599	55524599	-	7	231	0	312	2.941	0	-2.94118	0.0093366	0.128535	4.78179	0.661951	1
Solyc07g042297	SL3.0ch07	55543112	55545112	-	852	356	757	459	70.53	62.253	-8.27651	0.00012169	0	-3.6816	1	1
Solyc07g042313	SL3.0ch07	55592060	55594060	+	433	263	305	268	62.213	53.229	-8.98402	0.00526278	-0.256659	5.22057	0.453583	1
Solyc07g042330	SL3.0ch07	55607802	55609802	+	827	328	706	441	71.602	61.552	-10.0499	3.82598e-06	-0.329065	1.81632	0.528124	1
Solyc07g042440	SL3.0ch07	55704072	55706072	-	822	359	787	431	69.602	64.614	-4.98791	0.0277807	-1.32506	5.01465	0.00463649	0.303148
Solyc07g042810	SL3.0ch07	56417051	56419051	+	907	139	861	209	86.711	80.467	-6.24399	0.000605693	-1.16708	0.0192358	0.0540066	1
Solyc07g042850	SL3.0ch07	56517150	56519150	-	853	104	818	177	89.133	82.211	-6.92165	0.000105768	0.314724	-0.0603346	0.658868	1
Solyc07g043230	SL3.0ch07	56954125	56956125	-	266	1190	193	1194	18.269	13.915	-4.35431	0.00679297	0.93523	1.92383	0.397539	1
Solyc07g043400	SL3.0ch07	57237065	57239065	-	1688	180	1938	289	90.364	87.023	-3.34112	0.00339985	0	-3.91086	1	1
Solyc07g043687	SL3.0ch07	57789500	57791500	+	175	338	112	451	34.113	19.893	-14.2196	1.6714e-06	0	-3.91086	1	1
Solyc07g044750	SL3.0ch07	57930880	57932880	-	855	417	606	418	67.217	59.18	-8.03729	0.000429713	-0.30744	2.54314	0.484191	1
Solyc07g044760	SL3.0ch07	57931908	57933908	+	1048	422	741	387	71.293	65.691	-5.60103	0.00846145	-0.612712	8.12482	0.0238918	0.731475
Solyc07g045060	SL3.0ch07	58281549	58283549	+	277	488	175	477	36.209	26.84	-9.36866	0.000863307	0	-3.91086	1	1
Solyc07g045120	SL3.0ch07	58350033	58352033	-	577	715	431	688	44.659	38.517	-6.14291	0.00876251	0.147189	0.943861	0.824698	1
Solyc07g045420	SL3.0ch07	58645063	58647063	-	1078	441	719	453	70.968	61.348	-9.61962	2.13788e-06	0.573722	5.81877	0.0598457	1
Solyc07g045450	SL3.0ch07	58678472	58680472	-	357	734	298	807	32.722	26.968	-5.75395	0.0109732	-1.83845	-1.57432	0.0695514	1
Solyc07g045540	SL3.0ch07	58801217	58803217	+	985	575	544	649	63.141	45.599	-17.5417	2.44471e-18	-0.374714	4.28689	0.37085	1
Solyc07g045590	SL3.0ch07	58869469	58871469	-	571	212	450	242	72.925	65.029	-7.89575	0.00493094	0	-3.83477	1	1
Solyc07g045600	SL3.0ch07	58878715	58880715	+	1393	235	945	218	85.565	81.255	-4.30974	0.00881491	0	-3.91086	1	1
Solyc07g047900	SL3.0ch07	59238085	59240085	-	1340	405	1361	502	76.791	73.054	-3.73662	0.0272393	0.308819	3.62234	0.359149	1
Solyc07g048010	SL3.0ch07	59339537	59341537	-	387	103	320	160	78.98	66.667	-12.3129	0.000135404	-0.0295947	2.66123	0.959207	1
Solyc07g048020	SL3.0ch07	59343474	59345474	-	107	562	50	526	15.994	8.681	-7.31347	0.000611654	0	-3.91086	1	1
Solyc07g048030	SL3.0ch07	59342652	59344652	+	1406	300	959	319	82.415	75.039	-7.37588	9.74619e-06	-0.0629979	4.37666	0.891832	1
Solyc07g048035	SL3.0ch07	59346628	59348628	+	32	101	1	56	24.06	1.754	-22.3058	0.000302552	-0.123726	2.55009	0.758226	1
Solyc07g048085	SL3.0ch07	59405792	59407792	-	1640	484	1409	565	77.213	71.378	-5.83489	0.000140356	0.288333	-0.215832	0.728713	1
Solyc07g048110	SL3.0ch07	59435360	59437360	-	198	730	172	838	21.336	17.03	-4.3065	0.042277	0.509807	-1.60731	0.671143	1
Solyc07g049200	SL3.0ch07	59619579	59621579	+	781	544	642	555	58.943	53.634	-5.30931	0.0224127	0.0288882	4.99774	0.922794	1
Solyc07g049270	SL3.0ch07	59662361	59664361	-	22	283	3	180	7.213	1.639	-5.57377	0.0168939	0.42704	2.11768	0.353486	1
Solyc07g049370	SL3.0ch07	59769012	59771012	+	875	783	609	726	52.774	45.618	-7.15645	0.000630713	-0.851507	1.44708	0.38823	1
Solyc07g049420	SL3.0ch07	59814033	59816033	+	1081	473	839	509	69.562	62.24	-7.32206	0.000233122	0	-3.91086	1	1
Solyc07g049600	SL3.0ch07	60069626	60071626	-	767	144	655	254	84.193	72.057	-12.136	6.63274e-09	1.89815	-3.83241	1	1
Solyc07g049630	SL3.0ch07	60086541	60088541	+	450	408	766	852	52.448	47.342	-5.10515	0.0393981	0.227491	5.11189	0.530675	1
Solyc07g049660	SL3.0ch07	60150953	60152953	+	225	175	113	373	56.25	23.251	-32.999	4.83055e-22	1.32146	1.94292	0.148424	1
Solyc07g049670	SL3.0ch07	60151645	60153645	+	94	491	47	449	16.068	9.476	-6.59257	0.00557251	1.44331	3.68175	0.0425296	0.943671
Solyc07g049740	SL3.0ch07	60212054	60214054	+	345	13	462	79	96.369	85.397	-10.9713	4.24673e-07	-0.293221	2.26545	0.44599	1
Solyc07g049795	SL3.0ch07	60357252	60359252	-	46	26	29	46	63.889	38.667	-25.2222	0.00997031	0	-3.91086	1	1
Solyc07g051870	SL3.0ch07	60529452	60531452	-	195	244	239	437	44.419	35.355	-9.0641	0.00894239	-1.39763	0.406483	0.308445	1
Solyc07g052135	SL3.0ch07	60801511	60803511	-	1318	698	846	552	65.377	60.515	-4.86196	0.0125196	0	-3.6075	1	1
Solyc07g052150	SL3.0ch07	60801245	60803245	-	1041	745	721	617	58.287	53.886	-4.40028	0.0364721	0	-3.91086	1	1
Solyc07g052170	SL3.0ch07	60822238	60824238	+	279	270	232	307	50.82	43.043	-7.777	0.0286961	-0.535586	-1.56604	0.686345	1
Solyc07g052203	SL3.0ch07	60839885	60841885	-	690	325	618	403	67.98	60.529	-7.4514	0.00235559	1.11395	-2.31148	0.455152	1
Solyc07g052270	SL3.0ch07	60900228	60902228	-	584	195	601	264	74.968	69.48	-5.48814	0.0339637	0.960554	-2.5663	0.53499	1
Solyc07g052300	SL3.0ch07	60922462	60924462	+	285	223	164	298	56.102	35.498	-20.6045	2.86219e-09	-1.93909	-3.87098	1	1
Solyc07g052330	SL3.0ch07	60965255	60967255	-	205	115	179	216	64.063	45.316	-18.746	6.17558e-06	0	-3.91086	1	1
Solyc07g052340	SL3.0ch07	60965876	60967876	+	202	76	160	122	72.662	56.738	-15.9243	0.000557068	0.0917824	3.1118	0.824653	1
Solyc07g052400	SL3.0ch07	61044404	61046404	+	359	783	322	973	31.436	24.865	-6.57121	0.00168565	-0.281277	3.51293	0.557603	1
Solyc07g052410	SL3.0ch07	61052447	61054447	+	80	26	220	366	75.472	37.543	-37.929	1.11797e-11	0.847525	-3.56418	0.77222	1
Solyc07g052530	SL3.0ch07	61155083	61157083	+	197	116	144	191	62.939	42.985	-19.9542	4.54201e-06	-2.72173	-3.83322	0.671997	1
Solyc07g052750	SL3.0ch07	61328893	61330893	+	275	458	46	213	37.517	17.761	-19.7564	3.27592e-08	0.335112	1.81944	0.598564	1
Solyc07g052860	SL3.0ch07	61426640	61428640	-	148	278	38	312	34.742	10.857	-23.8846	8.24978e-14	-1.66874	-1.75146	0.152692	1
Solyc07g052870	SL3.0ch07	61425208	61427208	+	142	164	35	242	46.405	12.635	-33.7698	7.87012e-18	0.318405	-0.586342	0.652387	1
Solyc07g052960	SL3.0ch07	61491971	61493971	+	564	663	455	697	45.966	39.497	-6.46924	0.00607872	1.91158	7.90061	2.91476e-05	0.00750036
Solyc07g053030	SL3.0ch07	61597754	61599754	+	225	496	161	589	31.207	21.467	-9.73999	0.000168913	0	-3.13999	1	1
Solyc07g053165	SL3.0ch07	61746738	61748738	-	71	546	36	635	11.507	5.365	-6.14217	0.000429371	-0.0664789	5.60792	0.878988	1
Solyc07g053280	SL3.0ch07	61881023	61883023	-	472	864	405	898	35.329	31.082	-4.24722	0.0479384	-0.0447862	9.71674	0.865979	1
Solyc07g053290	SL3.0ch07	61891787	61893787	+	312	1539	233	1450	16.856	13.844	-3.01143	0.0342536	-0.166071	3.0739	0.721846	1
Solyc07g053340	SL3.0ch07	61921858	61923858	+	22	277	6	261	7.358	2.247	-5.11067	0.0175957	0	-3.91086	1	1
Solyc07g053370	SL3.0ch07	61953000	61955000	-	290	250	215	295	53.704	42.157	-11.5468	0.00107741	0	-3.73048	1	1
Solyc07g053550	SL3.0ch07	62099064	62101064	+	753	594	472	498	55.902	48.66	-7.24221	0.00277908	0.387035	7.31145	0.247468	1
Solyc07g053650	SL3.0ch07	62220675	62222675	+	49	735	14	689	6.25	1.991	-4.25853	0.000289877	0.0903043	7.80056	0.743826	1
Solyc07g053980	SL3.0ch07	62521858	62523858	-	332	535	238	695	38.293	25.509	-12.7839	1.0152e-07	0.199877	4.77283	0.667147	1
Solyc07g054040	SL3.0ch07	62571194	62573194	-	1284	286	429	506	81.783	45.882	-35.9011	2.32734e-74	3.86677	-3.16566	0.120803	1
Solyc07g054200	SL3.0ch07	62683797	62685797	+	1234	289	1024	306	81.024	76.992	-4.03181	0.0236693	0.250086	5.1702	0.387826	1
Solyc07g054250	SL3.0ch07	62724721	62726721	-	477	671	315	590	41.551	34.807	-6.74389	0.00696775	0	-3.91086	1	1
Solyc07g054237	SL3.0ch07	62724544	62726544	-	470	622	309	553	43.04	35.847	-7.19343	0.00514146	-3.28183	-3.75541	0.510426	1
Solyc07g054500	SL3.0ch07	62942777	62944777	-	977	666	830	833	59.464	49.91	-9.55459	5.15412e-07	-0.0906858	2.84668	0.892462	1
Solyc07g054620	SL3.0ch07	63015384	63017384	+	678	490	492	459	58.048	51.735	-6.31293	0.0122444	-0.367199	3.43832	0.315368	1
Solyc07g054630	SL3.0ch07	63028543	63030543	-	1473	381	1002	342	79.45	74.554	-4.89627	0.00453051	-1.06078	1.13343	0.146492	1
Solyc07g054690	SL3.0ch07	63057649	63059649	-	136	175	0	36	43.73	0	-43.7299	8.8195e-08	-0.842663	-0.0560952	0.517848	1
Solyc07g054720	SL3.0ch07	63069957	63071957	+	104	88	7	110	54.167	5.983	-48.1838	2.81594e-18	4.23082	-2.5842	0.213398	1
Solyc07g054730	SL3.0ch07	63082906	63084906	-	244	251	178	427	49.293	29.421	-19.8714	4.60442e-10	1.2246	6.22277	0.0220236	0.700837
Solyc07g054810	SL3.0ch07	63117525	63119525	+	430	321	232	263	57.257	46.869	-10.3883	0.00187352	-0.448641	1.31834	0.563796	1
Solyc07g054820	SL3.0ch07	63120127	63122127	+	310	685	93	675	31.156	12.109	-19.0464	2.269e-20	-0.538931	5.21084	0.0804276	1
Solyc07g054940	SL3.0ch07	63218241	63220241	-	300	475	195	436	38.71	30.903	-7.80635	0.00854637	-3.84289	-2.9	0.00972876	0.472155
Solyc07g055000	SL3.0ch07	63275323	63277323	-	964	635	581	620	60.288	48.376	-11.9113	6.76651e-09	-0.482526	-1.2675	0.614307	1
Solyc07g055160	SL3.0ch07	63421786	63423786	-	337	436	202	386	43.596	34.354	-9.24264	0.00279958	-0.553264	2.6698	0.332351	1
Solyc07g055180	SL3.0ch07	63423159	63425159	+	285	364	185	362	43.914	33.821	-10.0929	0.00207738	-0.222226	2.74607	0.697907	1
Solyc07g055410	SL3.0ch07	63569818	63571818	-	255	420	211	468	37.778	31.075	-6.70267	0.0271724	2.52929	-3.8387	0.667311	1
Solyc07g055540	SL3.0ch07	63663137	63665137	-	410	692	251	587	37.205	29.952	-7.25281	0.00355852	0.343897	3.72626	0.387018	1
Solyc07g055690	SL3.0ch07	63764581	63766581	-	155	476	89	451	24.564	16.481	-8.0827	0.00298469	1.47002	-0.874812	0.396824	1
Solyc07g055830	SL3.0ch07	63880108	63882108	+	1270	422	1004	466	75.059	68.299	-6.75978	0.000175232	0.131789	5.41257	0.604687	1
Solyc07g055870	SL3.0ch07	63916623	63918623	+	1126	344	673	334	76.599	66.832	-9.76646	1.18794e-06	0.183468	2.56718	0.689886	1
Solyc07g055920	SL3.0ch07	63969952	63971952	+	897	651	601	549	57.946	52.261	-5.68487	0.0121839	-0.189673	7.92024	0.527737	1
Solyc07g056110	SL3.0ch07	64111229	64113229	-	554	424	468	525	56.646	47.13	-9.51631	0.000183069	0.400391	5.00458	0.190843	1
Solyc07g056120	SL3.0ch07	64111330	64113330	+	557	512	468	572	52.105	45	-7.10477	0.0049179	0.32906	3.7988	0.394512	1
Solyc07g056150	SL3.0ch07	64129853	64131853	-	131	682	92	762	16.113	10.773	-5.34033	0.00573071	0.180626	7.07578	0.505698	1
Solyc07g056160	SL3.0ch07	64146472	64148472	+	1274	623	520	415	67.159	55.615	-11.5437	4.56144e-08	-0.0115767	-1.35798	1	1
Solyc07g056310	SL3.0ch07	64283669	64285669	+	174	467	127	525	27.145	19.479	-7.66656	0.00487555	-0.842908	-0.663167	0.228597	1
Solyc07g056340	SL3.0ch07	64344494	64346494	-	330	515	274	595	39.053	31.53	-7.52276	0.00475902	0.0728058	3.52045	0.889976	1
Solyc07g056420	SL3.0ch07	64406623	64408623	+	634	717	545	742	46.928	42.347	-4.58166	0.044358	-0.53112	9.43251	0.119297	1
Solyc07g056430	SL3.0ch07	64412477	64414477	+	940	508	860	597	64.917	59.025	-5.89173	0.00460208	-0.575094	4.94941	0.229872	1
Solyc07g056530	SL3.0ch07	64458598	64460598	-	359	642	266	664	35.864	28.602	-7.26199	0.00287781	-0.557615	1.60924	0.399645	1
Solyc07g056690	SL3.0ch07	64624253	64626253	-	1561	298	1384	343	83.97	80.139	-3.83091	0.010178	0	-3.56631	1	1
Solyc07g056700	SL3.0ch07	64634949	64636949	-	389	305	348	377	56.052	48	-8.05187	0.00864149	3.79686	4.07555	2.23051e-06	0.000848733
Solyc07g061710	SL3.0ch07	64803370	64805370	-	335	234	217	219	58.875	49.771	-9.10458	0.0151271	0	-3.91086	1	1
Solyc07g062120	SL3.0ch07	65061043	65063043	-	1365	268	980	414	83.588	70.301	-13.2872	1.46594e-16	0.101587	0.662461	0.915533	1
Solyc07g062210	SL3.0ch07	65141958	65143958	-	372	687	219	599	35.127	26.773	-8.35486	0.000636076	1.17603	-2.37704	0.541187	1
Solyc07g062330	SL3.0ch07	65220322	65222322	-	380	173	273	290	68.716	48.49	-20.2259	1.89634e-10	0	-3.91086	1	1
Solyc07g062410	SL3.0ch07	65299170	65301170	-	1994	318	1869	409	86.246	82.046	-4.20002	0.000585264	-0.00499283	3.24568	0.992123	1
Solyc07g062530	SL3.0ch07	65355378	65357378	+	593	438	483	457	57.517	51.383	-6.134	0.0193413	0.262847	10.0699	0.363776	1
Solyc07g062540	SL3.0ch07	65362810	65364810	+	100	136	87	264	42.373	24.786	-17.5866	6.97765e-05	0.435313	3.58043	0.263959	1
Solyc07g062920	SL3.0ch07	65672070	65674070	+	362	91	176	106	79.912	62.411	-17.5004	3.84951e-06	0.0851063	5.13974	0.748787	1
Solyc07g063020	SL3.0ch07	65752866	65754866	+	71	451	14	368	13.602	3.665	-9.93661	2.2999e-06	-2.11889	-1.94846	0.392914	1
Solyc07g063060	SL3.0ch07	65770761	65772761	+	205	426	67	214	32.488	23.843	-8.6447	0.0261516	0.251302	-1.1584	0.853317	1
Solyc07g063200	SL3.0ch07	65865606	65867606	+	66	800	31	646	7.621	4.579	-3.04222	0.0373078	0.164403	5.0258	0.661454	1
Solyc07g063330	SL3.0ch07	65949366	65951366	-	546	668	453	704	44.975	39.153	-5.82231	0.0145991	0.218063	4.36239	0.622872	1
Solyc07g063380	SL3.0ch07	65985778	65987778	+	1435	672	1199	670	68.106	64.152	-3.95436	0.0243054	0	-3.91086	1	1
Solyc07g063410	SL3.0ch07	66012469	66014469	+	332	403	237	431	45.17	35.479	-9.69103	0.00131959	-0.339073	4.5233	0.349099	1
Solyc07g063530	SL3.0ch07	66118018	66120018	+	52	290	39	379	15.205	9.33	-5.87453	0.0346571	-0.433189	5.72207	0.202097	1
Solyc07g063733	SL3.0ch07	66242108	66244108	+	133	100	130	176	57.082	42.484	-14.5979	0.00385764	0	-3.91086	1	1
Solyc07g063800	SL3.0ch07	66276114	66278114	-	260	249	257	356	51.081	41.925	-9.15559	0.00909413	0	-3.86883	1	1
Solyc07g063850	SL3.0ch07	66333498	66335498	+	315	791	204	676	28.481	23.182	-5.29919	0.0215501	-0.948552	-1.93997	0.648996	1
Solyc07g064010	SL3.0ch07	66449271	66451271	-	157	232	112	239	40.36	31.909	-8.45107	0.0425717	-0.136631	1.3285	0.768647	1
Solyc07g064210	SL3.0ch07	66578122	66580122	+	260	401	233	468	39.334	33.238	-6.09611	0.0479833	-3.0361	1.62614	2.01112e-05	0.00544954
Solyc07g064310	SL3.0ch07	66646879	66648879	-	34	422	18	519	7.456	3.352	-4.10419	0.013287	0	-3.91086	1	1
Solyc07g064360	SL3.0ch07	66676948	66678948	-	62	489	45	585	11.252	7.143	-4.10941	0.0369488	2.70093	-2.41721	0.169268	1
Solyc07g064373	SL3.0ch07	66697767	66699767	-	911	153	804	181	85.62	81.624	-3.99594	0.0403353	0	-3.83608	1	1
Solyc07g064377	SL3.0ch07	66698108	66700108	-	1232	213	1235	289	85.26	81.037	-4.22277	0.00835765	0	-3.91086	1	1
Solyc07g064390	SL3.0ch07	66706702	66708702	-	96	269	71	321	26.301	18.112	-8.18912	0.0234363	0.748472	-0.418106	0.319709	1
Solyc07g064615	SL3.0ch07	66814363	66816363	-	12	82	15	287	12.766	4.967	-7.79907	0.0404385	0.946471	-1.93658	0.448067	1
Solyc07g064640	SL3.0ch07	66834654	66836654	-	198	1007	161	1114	16.432	12.627	-3.80408	0.0209427	0.396691	2.78719	0.31746	1
Solyc07g064710	SL3.0ch07	66872255	66874255	+	288	674	190	716	29.938	20.971	-8.96633	7.79387e-05	0.251249	2.23076	0.564574	1
Solyc07g064800	SL3.0ch07	66914521	66916521	+	446	269	338	344	62.378	49.56	-12.8175	1.42361e-05	0.0705397	6.66773	0.810454	1
Solyc07g064820	SL3.0ch07	66937913	66939913	-	373	997	266	900	27.226	22.813	-4.41324	0.0304239	-0.201163	4.97086	0.687538	1
Solyc07g065000	SL3.0ch07	67079848	67081848	-	523	430	476	531	54.879	47.269	-7.61021	0.00345421	0.422032	3.88365	0.205851	1
Solyc07g065090	SL3.0ch07	67130413	67132413	-	1957	137	1579	149	93.457	91.377	-2.08018	0.0391878	-0.530713	5.4539	0.231755	1
Solyc07g065210	SL3.0ch07	67202506	67204506	-	886	140	696	158	86.355	81.499	-4.85595	0.0137123	-1.5608	-0.659489	0.118804	1
Solyc07g065220	SL3.0ch07	67206806	67208806	+	200	382	126	351	34.364	26.415	-7.94917	0.0180289	0.535517	5.44999	0.175321	1
Solyc07g065300	SL3.0ch07	67245560	67247560	+	566	606	490	671	48.294	42.205	-6.08852	0.0106078	0	-3.26762	1	1
Solyc07g065320	SL3.0ch07	67266251	67268251	-	521	767	379	834	40.45	31.245	-9.20546	1.49228e-05	0.0458113	2.31559	0.932345	1
Solyc07g065360	SL3.0ch07	67283953	67285953	+	633	484	480	505	56.67	48.731	-7.93869	0.00139419	0	-3.91086	1	1
Solyc07g065390	SL3.0ch07	67300105	67302105	-	301	768	311	1017	28.157	23.419	-4.73848	0.0233755	0.616703	1.2108	0.328498	1
Solyc07g065830	SL3.0ch07	67563398	67565398	+	193	292	152	338	39.794	31.02	-8.77341	0.0151549	0	-3.91086	1	1
Solyc07g066390	SL3.0ch07	67968130	67970130	-	146	109	129	337	57.255	27.682	-29.5725	2.57336e-13	-0.689179	1.87901	0.22835	1
Solyc07g066400	SL3.0ch07	67967365	67969365	+	148	239	128	315	38.243	28.894	-9.34899	0.0154341	0	-3.91086	1	1
Solyc07g066470	SL3.0ch07	68023064	68025064	-	571	485	425	485	54.072	46.703	-7.36867	0.00452222	-0.47192	7.3179	0.152235	1
Solyc08g005120	SL3.0ch08	78381	80381	-	1654	739	1148	643	69.118	64.098	-5.01999	0.00302463	2.67899	-1.26658	0.137664	1
Solyc08g005405	SL3.0ch08	298864	300864	+	5	246	0	303	1.992	0	-1.99203	0.0441671	-0.593055	2.21977	0.289692	1
Solyc08g005790	SL3.0ch08	611992	613992	+	148	365	83	304	28.85	21.447	-7.40287	0.0344078	4.43527	-0.612398	0.0404804	0.927837
Solyc08g005800	SL3.0ch08	611992	613992	+	148	365	83	304	28.85	21.447	-7.40287	0.0344078	0.181348	8.18766	0.653912	1
Solyc08g005840	SL3.0ch08	639654	641654	+	267	179	215	257	59.865	45.551	-14.3146	0.000120599	0	-3.91086	1	1
Solyc08g005880	SL3.0ch08	673539	675539	+	426	232	300	221	64.742	57.582	-7.16007	0.0341916	0	-3.91086	1	1
Solyc08g005890	SL3.0ch08	683702	685702	-	1401	447	1248	506	75.812	71.152	-4.66003	0.00632515	2.6382	-3.16162	0.55078	1
Solyc08g006130	SL3.0ch08	862500	864500	+	960	284	768	327	77.17	70.137	-7.03343	0.000722083	0	-3.91086	1	1
Solyc08g006290	SL3.0ch08	962286	964286	-	521	415	443	521	55.662	45.954	-9.70804	0.000164772	0	-3.91086	1	1
Solyc08g006300	SL3.0ch08	962574	964574	+	471	260	395	360	64.432	52.318	-12.1144	1.94209e-05	0	-3.91086	1	1
Solyc08g006380	SL3.0ch08	1004666	1006666	-	577	190	369	182	75.228	66.969	-8.25901	0.00485643	0.147857	-0.627925	0.943424	1
Solyc08g006410	SL3.0ch08	1009700	1011700	+	624	910	442	850	40.678	34.211	-6.46744	0.00209029	-0.251858	-1.88349	0.913393	1
Solyc08g006480	SL3.0ch08	1081099	1083099	-	630	548	556	588	53.48	48.601	-4.87908	0.0467669	-0.0930156	2.20364	0.852355	1
Solyc08g006490	SL3.0ch08	1080344	1082344	+	530	679	473	736	43.838	39.123	-4.71464	0.0480417	-5.03535	-2.66292	0.000267852	0.039589
Solyc08g006530	SL3.0ch08	1140693	1142693	+	39	638	11	592	5.761	1.824	-3.9365	0.00125062	-0.460687	3.70299	0.414985	1
Solyc08g006570	SL3.0ch08	1173259	1175259	+	219	305	47	260	41.794	15.309	-26.4844	1.68391e-14	0.304559	5.11381	0.304162	1
Solyc08g006645	SL3.0ch08	1223792	1225792	+	584	460	482	472	55.939	50.524	-5.41459	0.0416888	0.539099	-2.67343	0.693611	1
Solyc08g006840	SL3.0ch08	1371898	1373898	+	365	607	236	593	37.551	28.468	-9.08341	0.000304173	0.173062	4.6031	0.564208	1
Solyc08g006930	SL3.0ch08	1500179	1502179	-	126	152	77	230	45.324	25.081	-20.2423	4.18351e-06	-0.902791	6.64229	0.234394	1
Solyc08g007030	SL3.0ch08	1602535	1604535	-	367	343	303	418	51.69	42.025	-9.66518	0.00130225	0.217003	4.02569	0.480304	1
Solyc08g007110	SL3.0ch08	1668135	1670135	+	765	271	625	320	73.842	66.138	-7.70413	0.000982588	0.141161	6.88448	0.619586	1
Solyc08g007140	SL3.0ch08	1703475	1705475	+	561	668	435	726	45.647	37.468	-8.17917	0.000347112	0.200166	7.46303	0.581421	1
Solyc08g007170	SL3.0ch08	1736336	1738336	+	176	95	122	104	64.945	53.982	-10.9623	0.0406213	-0.25912	4.57889	0.377759	1
Solyc08g007280	SL3.0ch08	1851604	1853604	+	133	500	83	527	21.011	13.607	-7.4045	0.00255193	0	-3.91086	1	1
Solyc08g007430	SL3.0ch08	1990821	1992821	+	551	521	413	677	51.399	37.89	-13.5093	4.74927e-09	2.54462	-1.94755	0.0382022	0.906987
Solyc08g007435	SL3.0ch08	2000963	2002963	+	508	492	459	559	50.8	45.088	-5.71159	0.0293816	0	-3.86883	1	1
Solyc08g007450	SL3.0ch08	2026602	2028602	-	196	772	173	892	20.248	16.244	-4.0038	0.0486586	0	-3.91086	1	1
Solyc08g007460	SL3.0ch08	2029879	2031879	+	588	363	454	365	61.83	55.433	-6.3962	0.0195758	5.51894	4.80439	0.000162746	0.0269496
Solyc08g007560	SL3.0ch08	2104559	2106559	+	336	291	231	285	53.589	44.767	-8.82107	0.0116947	1.8909	-3.51085	1	1
Solyc08g007610	SL3.0ch08	2147597	2149597	+	678	574	478	622	54.153	43.455	-10.6988	2.58205e-06	1.94422	-3.87079	1	1
Solyc08g007630	SL3.0ch08	2159259	2161259	+	711	797	602	865	47.149	41.036	-6.11241	0.00368232	-0.135204	0.570535	0.889913	1
Solyc08g007711	SL3.0ch08	2208809	2210809	-	165	87	83	71	65.476	53.896	-11.5801	0.0491516	0	-3.91086	1	1
Solyc08g007712	SL3.0ch08	2215816	2217816	-	225	142	204	195	61.308	51.128	-10.1801	0.0169356	0	-3.91086	1	1
Solyc08g007820	SL3.0ch08	2327666	2329666	-	842	516	649	527	62.003	55.187	-6.81587	0.00257992	-0.306229	5.65023	0.698252	1
Solyc08g008420	SL3.0ch08	2832220	2834220	+	753	212	649	240	78.031	73.003	-5.02771	0.032791	1.82493	-3.4417	1	1
Solyc08g008430	SL3.0ch08	2837777	2839777	-	491	447	337	542	52.345	38.339	-14.0064	3.39107e-08	0	-3.91086	1	1
Solyc08g008445	SL3.0ch08	2839443	2841443	-	219	574	154	590	27.617	20.699	-6.91772	0.00601995	1.90118	-3.87171	1	1
Solyc08g008550	SL3.0ch08	2938184	2940184	-	1674	253	1376	370	86.871	78.809	-8.06208	1.6593e-09	1.40212	5.40847	1.79412e-06	0.000713022
Solyc08g013740	SL3.0ch08	3203815	3205815	-	1054	424	881	440	71.313	66.692	-4.62068	0.0241755	-0.178547	-2.17066	0.919958	1
Solyc08g013750	SL3.0ch08	3207354	3209354	+	1222	189	935	250	86.605	78.903	-7.70229	2.59227e-06	-0.205575	2.53417	0.675081	1
Solyc08g013756	SL3.0ch08	3216182	3218182	+	301	173	300	332	63.502	47.468	-16.0338	1.68766e-06	-1.9151	-0.817326	0.0223437	0.703791
Solyc08g013770	SL3.0ch08	3229850	3231850	+	749	67	667	125	91.789	84.217	-7.57204	2.86673e-05	-1.36158	-3.3729	0.578286	1
Solyc08g013758	SL3.0ch08	3230099	3232099	+	525	55	462	90	90.517	83.696	-6.82159	0.00298713	0	-3.91086	1	1
Solyc08g013850	SL3.0ch08	3287176	3289176	-	644	322	493	334	66.667	59.613	-7.05361	0.0081026	0.0293533	0.73856	0.972634	1
Solyc08g014050	SL3.0ch08	3656052	3658052	+	671	483	521	485	58.146	51.789	-6.35632	0.0106927	3.50006	-2.26538	0.0386534	0.911373
Solyc08g014100	SL3.0ch08	3728482	3730482	-	20	424	4	379	4.505	1.044	-3.46012	0.0103542	0.023572	2.83733	0.95579	1
Solyc08g014360	SL3.0ch08	4219618	4221618	-	1229	373	1013	420	76.717	70.691	-6.02575	0.000886868	0	-3.91086	1	1
Solyc08g014425	SL3.0ch08	4464868	4466868	+	962	60	621	181	94.129	77.431	-16.6977	6.22858e-24	-0.177848	3.46867	0.656369	1
Solyc08g014510	SL3.0ch08	4643593	4645593	-	899	442	748	480	67.04	60.912	-6.12747	0.00511785	-0.145772	3.52308	0.689754	1
Solyc08g015650	SL3.0ch08	5190052	5192052	+	525	528	374	524	49.858	41.648	-8.20944	0.00155108	0.410921	5.32009	0.14181	1
Solyc08g015960	SL3.0ch08	6415455	6417455	+	91	387	22	447	19.038	4.691	-14.3468	6.62023e-11	-0.283513	4.83859	0.29926	1
Solyc08g016060	SL3.0ch08	6629614	6631614	-	534	357	289	361	59.933	44.462	-15.4711	3.12704e-08	0.586144	1.21679	0.383174	1
Solyc08g016210	SL3.0ch08	7098045	7100045	-	245	1091	168	1110	18.338	13.146	-5.19278	0.00155526	2.19042	3.66066	0.0447762	0.963844
Solyc08g016215	SL3.0ch08	7098283	7100283	-	305	1054	237	1082	22.443	17.968	-4.47482	0.0142239	0	-3.86883	1	1
Solyc08g016630	SL3.0ch08	8094107	8096107	+	1666	1076	1206	1048	60.759	53.505	-7.25369	2.84005e-06	2.70323	-3.79367	0.658119	1
Solyc08g016780	SL3.0ch08	9310666	9312666	-	98	234	27	214	29.518	11.203	-18.3148	1.4311e-06	0	-3.91086	1	1
Solyc08g036660	SL3.0ch08	10492204	10494204	+	251	537	215	623	31.853	25.656	-6.19647	0.0180901	0.579813	1.94618	0.690268	1
Solyc08g036625	SL3.0ch08	10669484	10671484	+	588	213	513	261	73.408	66.279	-7.12917	0.00756861	0.355555	0.707359	0.810367	1
Solyc08g045640	SL3.0ch08	17829374	17831374	-	469	365	422	514	56.235	45.085	-11.1495	2.60571e-05	0.0192226	4.21146	0.957916	1
Solyc08g044550	SL3.0ch08	19298403	19300403	-	600	144	509	166	80.645	75.407	-5.23775	0.0419013	0	-3.91086	1	1
Solyc08g044380	SL3.0ch08	21164706	21166706	-	1085	435	903	445	71.382	66.988	-4.39345	0.0310613	0	-3.91086	1	1
Solyc08g044336	SL3.0ch08	21898306	21900306	+	255	144	223	178	63.91	55.611	-8.2988	0.0419751	0	-3.91086	1	1
Solyc08g043190	SL3.0ch08	22874718	22876718	-	401	694	356	822	36.621	30.221	-6.40029	0.00518521	0.738397	-2.56752	0.668775	1
Solyc08g042140	SL3.0ch08	23515798	23517798	-	360	59	179	80	85.919	69.112	-16.8069	2.88483e-06	-0.403167	3.43018	0.256554	1
Solyc08g042130	SL3.0ch08	23800792	23802792	+	1303	66	1299	102	95.179	92.719	-2.45948	0.0198022	0.315979	3.88536	0.373566	1
Solyc08g042060	SL3.0ch08	24007332	24009332	-	795	334	717	376	70.416	65.599	-4.81703	0.0389763	0.794226	-0.424645	0.201855	1
Solyc08g042040	SL3.0ch08	24146486	24148486	-	511	51	338	156	90.925	68.421	-22.5042	7.34383e-19	-0.278027	1.98946	0.591444	1
Solyc08g041855	SL3.0ch08	25588922	25590922	-	825	172	626	194	82.748	76.341	-6.40678	0.00337053	0	-3.91086	1	1
Solyc08g023530	SL3.0ch08	27526434	27528434	+	610	212	497	243	74.209	67.162	-7.04708	0.00898889	0.264883	2.00124	0.564133	1
Solyc08g023380	SL3.0ch08	28300204	28302204	+	692	67	546	97	91.173	84.914	-6.25813	0.00156618	0	-3.91086	1	1
Solyc08g022240	SL3.0ch08	29943689	29945689	-	204	233	140	262	46.682	34.826	-11.8561	0.00254709	0.643858	1.05754	0.555056	1
Solyc08g022080	SL3.0ch08	32518207	32520207	+	756	97	542	108	88.628	83.385	-5.24376	0.0125972	0.244336	6.42692	0.371186	1
Solyc08g022020	SL3.0ch08	33930300	33932300	+	376	789	191	698	32.275	21.485	-10.7899	6.68123e-07	0.491056	-2.32855	0.739389	1
Solyc08g021920	SL3.0ch08	34330739	34332739	-	760	272	573	349	73.643	62.148	-11.4959	7.7043e-07	0.373399	6.52701	0.280755	1
Solyc08g021890	SL3.0ch08	34330739	34332739	-	760	272	573	349	73.643	62.148	-11.4959	7.7043e-07	0	-3.91086	1	1
Solyc08g029010	SL3.0ch08	38738807	38740807	+	43459	8579	12753	3105	83.514	80.42	-3.09399	1.80429e-17	0	-3.91086	1	1
Solyc08g028975	SL3.0ch08	39152259	39154259	-	760	161	657	189	82.519	77.66	-4.85943	0.0313381	0	-3.91086	1	1
Solyc08g059700	SL3.0ch08	44815167	44817167	+	907	474	744	557	65.677	57.187	-8.49027	5.60611e-05	3.59762	-3.56709	0.469356	1
Solyc08g059750	SL3.0ch08	45298589	45300589	-	12	297	0	229	3.883	0	-3.8835	0.00634998	-4.56051	-3.35705	0.232103	1
Solyc08g060810	SL3.0ch08	45631166	45633166	-	529	153	443	184	77.566	70.654	-6.91207	0.0140099	0.209048	7.7017	0.556202	1
Solyc08g061060	SL3.0ch08	46548457	46550457	-	272	18	82	22	93.793	78.846	-14.9469	0.000302652	-2.74719	-0.407952	0.0572532	1
Solyc08g061277	SL3.0ch08	48559403	48561403	+	607	183	593	249	76.835	70.428	-6.40789	0.011548	0	-3.91086	1	1
Solyc08g061320	SL3.0ch08	48576718	48578718	-	184	1122	139	1124	14.089	11.006	-3.08328	0.0470197	-0.0304656	8.09972	0.904398	1
Solyc08g061570	SL3.0ch08	49210410	49212410	-	999	170	1041	302	85.458	77.513	-7.94463	3.91577e-06	0.0819191	-2.08759	0.961324	1
Solyc08g061595	SL3.0ch08	49235018	49237018	-	440	301	294	326	59.379	47.419	-11.9599	9.13339e-05	0	-3.87049	1	1
Solyc08g061696	SL3.0ch08	49499720	49501720	+	614	131	582	168	82.416	77.6	-4.81611	0.046808	0	-3.91086	1	1
Solyc08g061800	SL3.0ch08	49594873	49596873	+	1584	99	1303	375	94.118	77.652	-16.4657	1.12272e-42	0.218382	0.777145	0.726823	1
Solyc08g061778	SL3.0ch08	49595365	49597365	+	1170	184	615	480	86.411	56.164	-30.2463	2.61572e-61	-0.428113	3.49652	0.263506	1
Solyc08g062825	SL3.0ch08	52220368	52222368	-	930	91	866	132	91.087	86.774	-4.31362	0.00790942	1.93119	-3.50537	1	1
Solyc08g062960	SL3.0ch08	52445981	52447981	-	802	259	692	283	75.589	70.974	-4.61471	0.048249	-0.500119	7.024	0.315872	1
Solyc08g063130	SL3.0ch08	52831838	52833838	+	1453	291	1463	407	83.314	78.235	-5.07893	0.000680763	0.153114	-1.27929	0.929526	1
Solyc08g065320	SL3.0ch08	53290230	53292230	+	260	145	224	177	64.198	55.86	-8.33718	0.0422333	0.381398	4.51624	0.264299	1
Solyc08g065470	SL3.0ch08	53645010	53647010	+	871	264	634	295	76.74	68.245	-8.49466	0.000129126	-0.0664851	2.55853	0.878637	1
Solyc08g065640	SL3.0ch08	53914392	53916392	-	321	446	242	511	41.851	32.138	-9.71325	0.000592318	0.142368	5.36841	0.59118	1
Solyc08g065680	SL3.0ch08	53986985	53988985	+	1066	268	765	273	79.91	73.699	-6.21062	0.00180747	0	-3.91086	1	1
Solyc08g065990	SL3.0ch08	54500139	54502139	+	711	339	582	357	67.714	61.981	-5.73346	0.0233626	-0.0846394	5.44108	0.768962	1
Solyc08g066000	SL3.0ch08	54513852	54515852	-	330	27	151	41	92.437	78.646	-13.7911	4.48057e-05	-0.0651357	3.8028	0.849076	1
Solyc08g066050	SL3.0ch08	54564003	54566003	+	113	273	78	331	29.275	19.071	-10.2037	0.00364633	1.16153	-0.52225	0.376975	1
Solyc08g066100	SL3.0ch08	54599045	54601045	-	728	883	568	882	45.189	39.172	-6.01691	0.0035706	0.440562	6.1188	0.118758	1
Solyc08g066430	SL3.0ch08	55129609	55131609	+	517	675	326	690	43.372	32.087	-11.2859	7.6968e-07	0	-3.91086	1	1
Solyc08g066560	SL3.0ch08	55363469	55365469	-	509	333	356	341	60.451	51.076	-9.37527	0.00125406	-0.0701534	-3.53005	1	1
Solyc08g066730	SL3.0ch08	55611538	55613538	+	1251	440	1022	447	73.98	69.571	-4.40876	0.0183209	0.500472	4.60185	0.291558	1
Solyc08g066940	SL3.0ch08	55877651	55879651	-	411	179	357	212	69.661	62.742	-6.91936	0.0334058	-0.256087	4.08728	0.43521	1
Solyc08g067080	SL3.0ch08	56056499	56058499	+	7	207	0	160	3.271	0	-3.27103	0.0495912	1.78529	-3.72286	1	1
Solyc08g067330	SL3.0ch08	56452212	56454212	-	1200	400	1073	437	75	71.06	-3.9404	0.0345091	0	-3.91086	1	1
Solyc08g067370	SL3.0ch08	56479362	56481362	-	185	981	126	936	15.866	11.864	-4.0018	0.0203263	-0.406433	5.03183	0.554367	1
Solyc08g067440	SL3.0ch08	56549439	56551439	-	236	436	134	367	35.119	26.747	-8.37254	0.00816911	0.740654	-1.15704	0.484634	1
Solyc08g067450	SL3.0ch08	56550736	56552736	+	323	342	209	333	48.571	38.561	-10.0105	0.00258229	0	-3.72952	1	1
Solyc08g067480	SL3.0ch08	56565850	56567850	-	555	185	367	195	75	65.302	-9.69751	0.000904954	-0.347309	5.01451	0.254931	1
Solyc08g067490	SL3.0ch08	56567456	56569456	+	802	545	477	483	59.54	49.688	-9.85222	2.52546e-05	-1.95669	-1.37768	0.110636	1
Solyc08g067620	SL3.0ch08	56694911	56696911	+	125	650	92	708	16.129	11.5	-4.62903	0.0235378	5.48261	-2.29624	0.0610581	1
Solyc08g067810	SL3.0ch08	56919065	56921065	-	717	441	633	479	61.917	56.924	-4.99264	0.0404434	-0.110775	5.4601	0.675118	1
Solyc08g067970	SL3.0ch08	57090443	57092443	-	224	205	172	257	52.214	40.093	-12.1212	0.00216458	0.835926	2.37537	0.0626962	1
Solyc08g067995	SL3.0ch08	57125956	57127956	+	26	208	5	138	11.111	3.497	-7.61461	0.0290707	-2.75324	-3.49191	0.640782	1
Solyc08g068000	SL3.0ch08	57133288	57135288	-	112	285	59	333	28.212	15.051	-13.1606	7.11981e-05	-2.83918	-3.52198	0.365734	1
Solyc08g068013	SL3.0ch08	57169372	57171372	-	571	40	486	77	93.453	86.323	-7.13009	0.000342653	0.792907	0.769424	0.441988	1
Solyc08g068140	SL3.0ch08	57284443	57286443	-	401	278	247	286	59.057	46.341	-12.716	9.7452e-05	0	-3.91086	1	1
Solyc08g068230	SL3.0ch08	57401257	57403257	-	193	326	90	323	37.187	21.792	-15.3951	3.57204e-06	-1.68651	-1.15281	0.184044	1
Solyc08g068260	SL3.0ch08	57421632	57423632	-	252	747	142	809	25.225	14.932	-10.2936	2.07438e-07	0	-3.91086	1	1
Solyc08g068570	SL3.0ch08	57768780	57770780	+	1218	259	1126	333	82.464	77.176	-5.28831	0.00185303	-0.697535	1.4132	0.162201	1
Solyc08g068700	SL3.0ch08	57897740	57899740	-	704	209	654	276	77.108	70.323	-6.78585	0.00417913	0.481219	5.59351	0.370615	1
Solyc08g068840	SL3.0ch08	57995301	57997301	-	248	865	176	803	22.282	17.978	-4.30459	0.040059	0.356643	2.34137	0.387538	1
Solyc08g068940	SL3.0ch08	58070815	58072815	-	23	167	11	191	12.105	5.446	-6.65972	0.0473328	-2.76107	-3.83217	0.672714	1
Solyc08g069050	SL3.0ch08	58200869	58202869	-	702	193	564	209	78.436	72.962	-5.47327	0.026567	0.053084	4.81807	0.860634	1
Solyc08g074250	SL3.0ch08	58483426	58485426	-	315	321	250	453	49.528	35.562	-13.9664	2.73928e-06	-2.92562	-3.32751	0.293414	1
Solyc08g074303	SL3.0ch08	58558180	58560180	-	85	300	40	252	22.078	13.699	-8.37929	0.0197472	-6.08384	-3.08394	0.00886832	0.452499
Solyc08g074680	SL3.0ch08	58952430	58954430	-	950	376	1009	493	71.644	67.177	-4.46695	0.0299022	0	-3.55731	1	1
Solyc08g074720	SL3.0ch08	58983965	58985965	+	206	373	177	456	35.579	27.962	-7.6165	0.0141402	0	-1.28386	1	1
Solyc08g074835	SL3.0ch08	59087282	59089282	+	941	583	801	639	61.745	55.625	-6.12041	0.0033014	0	-1.68353	1	1
Solyc08g075050	SL3.0ch08	59335717	59337717	+	81	426	42	398	15.976	9.545	-6.43088	0.0117093	0	-3.91086	1	1
Solyc08g075260	SL3.0ch08	59497790	59499790	+	288	494	186	453	36.829	29.108	-7.72066	0.00801908	1.89486	-3.72998	1	1
Solyc08g075270	SL3.0ch08	59498199	59500199	+	106	438	61	436	19.485	12.274	-7.21165	0.0063652	-1.27115	-3.09913	0.596383	1
Solyc08g075420	SL3.0ch08	59677051	59679051	-	1271	610	1072	616	67.57	63.507	-4.06333	0.0293093	0.216032	5.55977	0.672075	1
Solyc08g075490	SL3.0ch08	59767029	59769029	-	224	1068	160	1069	17.337	13.019	-4.31875	0.00942903	-0.655975	4.40389	0.311731	1
Solyc08g075650	SL3.0ch08	59921314	59923314	-	177	180	12	48	49.58	20	-29.5798	0.000131533	-0.121659	4.5696	0.690832	1
Solyc08g075690	SL3.0ch08	59943474	59945474	-	121	113	100	165	51.709	37.736	-13.9736	0.00760742	0.164696	8.71559	0.601697	1
Solyc08g075890	SL3.0ch08	60095823	60097823	+	1037	406	778	427	71.864	64.564	-7.29986	0.000392344	-0.0928941	7.31363	0.735234	1
Solyc08g075900	SL3.0ch08	60106126	60108126	-	321	745	197	742	30.113	20.98	-9.1328	2.72437e-05	4.79973	-3.56563	0.102457	1
Solyc08g075910	SL3.0ch08	60106880	60108880	+	325	683	200	705	32.242	22.099	-10.1426	7.79861e-06	-0.320728	3.69921	0.332241	1
Solyc08g075990	SL3.0ch08	60182644	60184644	-	444	680	243	545	39.502	30.838	-8.66422	0.000603271	-1.24325	2.19632	0.020233	0.674456
Solyc08g076110	SL3.0ch08	60272430	60274430	-	12	283	1	252	4.068	0.395	-3.67254	0.0133117	0	-3.91086	1	1
Solyc08g076420	SL3.0ch08	60558705	60560705	-	1011	215	703	321	82.463	68.652	-13.811	6.63628e-13	-0.0290818	7.14229	0.91452	1
Solyc08g076430	SL3.0ch08	60558992	60560992	+	1261	166	1013	273	88.367	78.771	-9.59582	2.81861e-10	0.0951636	4.23012	0.769333	1
Solyc08g076470	SL3.0ch08	60592058	60594058	+	313	281	292	387	52.694	43.004	-9.68918	0.00265714	-0.407936	4.30489	0.219738	1
Solyc08g076493	SL3.0ch08	60613321	60615321	+	42	615	21	728	6.393	2.804	-3.58896	0.00637368	0	-3.91086	1	1
Solyc08g076595	SL3.0ch08	60670530	60672530	+	1661	566	1377	692	74.585	66.554	-8.03075	1.128e-07	0	-3.91086	1	1
Solyc08g076630	SL3.0ch08	60685856	60687856	-	414	735	364	811	36.031	30.979	-5.05261	0.0286982	0	-3.91086	1	1
Solyc08g077000	SL3.0ch08	61066058	61068058	-	574	397	413	423	59.114	49.402	-9.7124	0.00024131	0	-3.91086	1	1
Solyc08g077110	SL3.0ch08	61157144	61159144	-	694	383	616	512	64.438	54.61	-9.82833	2.40414e-05	0.588593	2.9616	0.218495	1
Solyc08g077160	SL3.0ch08	61185787	61187787	+	349	502	252	517	41.011	32.77	-8.24074	0.00292638	0	-3.87342	1	1
Solyc08g077483	SL3.0ch08	61561819	61563819	+	937	256	850	305	78.541	73.593	-4.94842	0.0154868	0	-3.64006	1	1
Solyc08g077490	SL3.0ch08	61561819	61563819	+	937	256	850	305	78.541	73.593	-4.94842	0.0154868	3.01487	-3.68703	0.501673	1
Solyc08g077560	SL3.0ch08	61660068	61662068	+	1020	727	812	715	58.386	53.176	-5.20964	0.0102579	0.141203	7.09044	0.80706	1
Solyc08g077610	SL3.0ch08	61684287	61686287	+	791	383	361	529	67.376	40.562	-26.8147	4.91036e-32	-3.03529	-3.73499	0.519995	1
Solyc08g077760	SL3.0ch08	61780783	61782783	-	305	281	221	296	52.048	42.747	-9.30117	0.00751638	0.298577	3.89097	0.602699	1
Solyc08g077827	SL3.0ch08	61858072	61860072	+	580	519	414	554	52.775	42.769	-10.0067	4.49593e-05	0.485268	0.553311	0.405731	1
Solyc08g077830	SL3.0ch08	61858825	61860825	+	547	296	392	493	64.887	44.294	-20.5935	3.6496e-16	0.325031	4.34503	0.295456	1
Solyc08g077890	SL3.0ch08	61913058	61915058	+	408	333	364	380	55.061	48.925	-6.136	0.0456138	-0.235985	7.64015	0.396434	1
Solyc08g077910	SL3.0ch08	61931435	61933435	+	384	635	302	627	37.684	32.508	-5.17593	0.0422174	-0.221626	-2.92159	1	1
Solyc08g078100	SL3.0ch08	62069465	62071465	+	557	380	467	408	59.445	53.371	-6.07361	0.0279632	-0.253541	2.05645	0.612563	1
Solyc08g078160	SL3.0ch08	62106032	62108032	-	600	112	572	170	84.27	77.089	-7.18071	0.00248994	0	-3.76263	1	1
Solyc08g078430	SL3.0ch08	62365038	62367038	-	823	155	727	188	84.151	79.454	-4.69778	0.023917	0.0585034	6.98442	0.832854	1
Solyc08g078460	SL3.0ch08	62380434	62382434	+	322	541	246	581	37.312	29.746	-7.56563	0.00463015	2.8816	5.99018	0.000145885	0.02473
Solyc08g078690	SL3.0ch08	62582815	62584815	+	370	425	316	577	46.541	35.386	-11.1545	3.20854e-05	0.108136	2.82545	0.803779	1
Solyc08g078730	SL3.0ch08	62599949	62601949	-	490	1088	347	1001	31.052	25.742	-5.31012	0.0059376	-0.849805	-3.57238	1	1
Solyc08g078840	SL3.0ch08	62659468	62661468	+	848	343	633	425	71.201	59.83	-11.3708	2.07099e-07	-1.19173	-0.247931	0.307561	1
Solyc08g078910	SL3.0ch08	62700466	62702466	-	349	719	223	605	32.678	26.932	-5.74554	0.0213867	0	-3.24357	1	1
Solyc08g079010	SL3.0ch08	62781019	62783019	+	91	485	44	542	15.799	7.509	-8.29008	7.47174e-05	0	-3.91086	1	1
Solyc08g079110	SL3.0ch08	62871571	62873571	+	731	737	724	872	49.796	45.363	-4.43223	0.0377632	-0.896456	4.91534	0.0130918	0.5522
Solyc08g079460	SL3.0ch08	63100533	63102533	+	166	521	71	327	24.163	17.839	-6.32383	0.0369806	-0.286242	2.06503	0.64412	1
Solyc08g079510	SL3.0ch08	63136349	63138349	+	258	517	226	604	33.29	27.229	-6.06141	0.0247529	0.252288	4.66985	0.535326	1
Solyc08g079570	SL3.0ch08	63193985	63195985	-	288	697	198	620	29.239	24.205	-5.0332	0.0402848	-0.441424	3.40918	0.216994	1
Solyc08g079590	SL3.0ch08	63214421	63216421	+	1220	204	1034	266	85.674	79.538	-6.1357	0.000167065	0.0887472	3.20739	0.872999	1
Solyc08g079750	SL3.0ch08	63361273	63363273	-	727	909	647	1005	44.438	39.165	-5.273	0.008305	0.164924	3.44246	0.760449	1
Solyc08g079830	SL3.0ch08	63399373	63401373	-	1098	176	915	204	86.185	81.769	-4.41581	0.011613	-0.248015	4.73462	0.454303	1
Solyc08g079950	SL3.0ch08	63467061	63469061	+	180	198	135	286	47.619	32.067	-15.5525	7.11372e-05	0	-3.91086	1	1
Solyc08g080030	SL3.0ch08	63500457	63502457	+	217	904	138	797	19.358	14.759	-4.59836	0.0201845	0.0962028	4.2219	0.773548	1
Solyc08g080090	SL3.0ch08	63536783	63538783	-	1650	603	1226	563	73.236	68.53	-4.70578	0.00457303	0.680094	8.53559	0.194301	1
Solyc08g080290	SL3.0ch08	63729634	63731634	-	141	346	52	321	28.953	13.941	-15.0118	1.34754e-06	-1.92776	0.650126	0.0524609	1
Solyc08g080370	SL3.0ch08	63792772	63794772	+	587	583	507	664	50.171	43.296	-6.87461	0.00378998	-0.378767	5.25456	0.206041	1
Solyc08g080450	SL3.0ch08	63866820	63868820	-	473	385	451	495	55.128	47.674	-7.45379	0.00596908	0	-3.17378	1	1
Solyc08g080580	SL3.0ch08	63962328	63964328	-	644	665	378	675	49.198	35.897	-13.3004	1.75332e-09	-0.159862	2.15781	0.732161	1
Solyc08g080590	SL3.0ch08	63963675	63965675	+	381	573	269	563	39.937	32.332	-7.60538	0.00390677	0	-3.83425	1	1
Solyc08g080585	SL3.0ch08	63963720	63965720	+	381	573	269	563	39.937	32.332	-7.60538	0.00390677	0	-0.23098	1	1
Solyc08g080630	SL3.0ch08	64002067	64004067	-	174	500	64	386	25.816	14.222	-11.5938	2.15252e-05	-1.28219	5.60431	0.489721	1
Solyc08g080740	SL3.0ch08	64069224	64071224	-	521	544	501	661	48.92	43.115	-5.80487	0.0189787	0	-3.91086	1	1
Solyc08g080850	SL3.0ch08	64152629	64154629	+	1291	735	807	644	63.722	55.617	-8.1048	1.56529e-05	0.246677	4.30528	0.420657	1
Solyc08g080890	SL3.0ch08	64181031	64183031	+	615	753	458	677	44.956	40.352	-4.60372	0.0480944	0.289282	-0.129786	0.705424	1
Solyc08g080910	SL3.0ch08	64196018	64198018	-	289	1051	225	1030	21.567	17.928	-3.63888	0.0477408	0.164741	3.92906	0.628689	1
Solyc08g081220	SL3.0ch08	64402444	64404444	-	1793	411	1357	389	81.352	77.721	-3.63158	0.016082	-0.760751	1.1629	0.344233	1
Solyc08g081420	SL3.0ch08	64614583	64616583	-	418	658	266	663	38.848	28.633	-10.2146	1.33429e-05	-0.136069	4.66461	0.657349	1
Solyc08g081520	SL3.0ch08	64672730	64674730	+	441	339	468	471	56.538	49.84	-6.69821	0.0171904	-2.57732	1.80468	0.0157872	0.605227
Solyc08g081750	SL3.0ch08	64843140	64845140	-	34868	10376	10679	3544	77.067	75.083	-1.98396	1.17061e-05	0.0619962	3.84683	0.857705	1
Solyc08g081890	SL3.0ch08	64933232	64935232	-	425	1044	280	1055	28.931	20.974	-7.95746	1.19318e-05	0.451088	6.28602	0.290227	1
Solyc08g081925	SL3.0ch08	64954073	64956073	+	146	528	47	468	21.662	9.126	-12.5355	4.95061e-08	0.21074	5.15275	0.462278	1
Solyc08g081930	SL3.0ch08	64958620	64960620	+	339	110	217	130	75.501	62.536	-12.9651	0.000550038	0.409406	5.02085	0.207102	1
Solyc08g082340	SL3.0ch08	65277514	65279514	+	58	272	37	334	17.576	9.973	-7.60271	0.0127129	-0.12292	5.9808	0.627802	1
Solyc08g082420	SL3.0ch08	65352099	65354099	+	16	129	7	209	11.034	3.241	-7.79374	0.0126226	-0.117655	4.64177	0.686635	1
Solyc08g082540	SL3.0ch08	65412118	65414118	+	46	238	15	227	16.197	6.198	-9.99884	0.00163716	-0.327458	5.01593	0.353957	1
Solyc08g082600	SL3.0ch08	65441197	65443197	+	89	290	42	239	23.483	14.947	-8.53623	0.0215982	0	-3.91086	1	1
Solyc08g082760	SL3.0ch08	65573399	65575399	+	183	430	106	365	29.853	22.505	-7.34787	0.0200514	-0.0727532	5.52748	0.818879	1
Solyc08g082960	SL3.0ch08	65715528	65717528	+	369	330	315	376	52.79	45.586	-7.20359	0.0210745	0.578104	3.18896	0.173459	1
Solyc08g083190	SL3.0ch08	65849115	65851115	-	277	237	262	333	53.891	44.034	-9.85744	0.0045493	-2.78838	-0.995733	0.00324938	0.242383
Solyc08g083210	SL3.0ch08	65863327	65865327	+	313	347	287	432	47.424	39.917	-7.50769	0.0168035	-3.9328	0.643744	0.0211669	0.687268
Solyc09g005010	SL3.0ch09	14751	16751	-	30	198	2	85	13.158	2.299	-10.859	0.0101209	0.176428	5.47551	0.549353	1
Solyc09g005320	SL3.0ch09	243467	245467	+	378	409	181	325	48.03	35.771	-12.2597	0.000113282	1.18987	5.1711	0.000387237	0.0516817
Solyc09g005330	SL3.0ch09	251343	253343	+	148	545	50	411	21.356	10.846	-10.5104	2.06218e-05	0.113736	4.39517	0.837558	1
Solyc09g005370	SL3.0ch09	284308	286308	+	15	308	2	204	4.644	0.971	-3.67309	0.0492611	0	-3.91086	1	1
Solyc09g005640	SL3.0ch09	435630	437630	+	36	275	19	326	11.576	5.507	-6.06832	0.0200557	-0.195881	4.41326	0.535879	1
Solyc09g005770	SL3.0ch09	539521	541521	+	348	398	269	417	46.649	39.213	-7.43597	0.0146204	-4.74209	-1.56213	0.00161595	0.151307
Solyc09g007010	SL3.0ch09	685767	687767	+	309	233	128	141	57.011	47.584	-9.42743	0.0342629	3.7561	3.09205	0.0143781	0.581759
Solyc09g007110	SL3.0ch09	757831	759831	-	138	280	119	361	33.014	24.792	-8.22269	0.0217745	-0.113648	3.28953	0.813288	1
Solyc09g007300	SL3.0ch09	903668	905668	-	736	141	689	181	83.922	79.195	-4.72706	0.0300741	0.427391	4.04284	0.188066	1
Solyc09g007310	SL3.0ch09	904372	906372	+	455	252	372	402	64.356	48.062	-16.2944	5.47513e-09	0.361651	6.11802	0.273684	1
Solyc09g007480	SL3.0ch09	1038353	1040353	+	528	296	354	375	64.078	48.56	-15.518	1.58544e-08	0.761026	3.73566	0.10642	1
Solyc09g007500	SL3.0ch09	1077711	1079711	-	359	502	288	536	41.696	34.951	-6.74425	0.0154747	-0.0276663	5.89205	0.927229	1
Solyc09g007510	SL3.0ch09	1089542	1091542	-	311	862	166	762	26.513	17.888	-8.62528	2.51183e-05	0.0714595	3.20748	0.894212	1
Solyc09g007550	SL3.0ch09	1148564	1150564	+	1181	449	948	441	72.454	68.251	-4.20345	0.0306476	0.146985	2.42661	0.799912	1
Solyc09g007580	SL3.0ch09	1170016	1172016	+	39	311	26	423	11.143	5.791	-5.35221	0.0240197	0	-3.91086	1	1
Solyc09g007630	SL3.0ch09	1200695	1202695	+	1152	309	965	325	78.85	74.806	-4.0439	0.0324782	-0.0354556	4.14997	0.911701	1
Solyc09g007870	SL3.0ch09	1397606	1399606	+	930	272	921	385	77.371	70.521	-6.85037	0.000621165	0.243118	6.98986	0.422065	1
Solyc09g008140	SL3.0ch09	1605659	1607659	+	132	443	101	633	22.957	13.76	-9.1963	0.000154349	0.042239	3.91775	0.912972	1
Solyc09g008175	SL3.0ch09	1627405	1629405	-	293	292	299	395	50.085	43.084	-7.0019	0.0338722	1.03035	6.19405	0.274931	1
Solyc09g008230	SL3.0ch09	1679112	1681112	+	617	506	435	480	54.942	47.541	-7.40114	0.00398078	0.437176	6.92179	0.17667	1
Solyc09g008340	SL3.0ch09	1802788	1804788	+	116	659	85	698	14.968	10.856	-4.11206	0.0386095	0.241905	6.35253	0.409939	1
Solyc09g008400	SL3.0ch09	1860096	1862096	-	220	575	124	511	27.673	19.528	-8.1454	0.00179969	-0.171011	4.14334	0.597413	1
Solyc09g008550	SL3.0ch09	2034514	2036514	+	806	501	588	516	61.668	53.261	-8.40707	0.000226154	-0.456636	3.39496	0.240395	1
Solyc09g008700	SL3.0ch09	2147652	2149652	-	687	489	402	530	58.418	43.133	-15.2853	8.73378e-11	0.0822652	4.71424	0.831156	1
Solyc09g008830	SL3.0ch09	2254528	2256528	+	8	197	1	279	3.902	0.357	-3.5453	0.0163309	0.232231	4.56469	0.665076	1
Solyc09g009260	SL3.0ch09	2645905	2647905	-	277	304	189	335	47.676	36.069	-11.6077	0.000665748	0.153347	9.53004	0.623877	1
Solyc09g009280	SL3.0ch09	2660299	2662299	-	329	953	280	1041	25.663	21.196	-4.46696	0.020834	-2.64303	-3.47617	0.610115	1
Solyc09g009380	SL3.0ch09	2819400	2821400	-	2071	465	1547	428	81.664	78.329	-3.33492	0.0177996	-0.882652	0.957661	0.319261	1
Solyc09g009630	SL3.0ch09	3049313	3051313	-	82	1135	51	1108	6.738	4.4	-2.33753	0.0385651	0.192155	3.08317	0.631653	1
Solyc09g009660	SL3.0ch09	3061644	3063644	+	1182	318	1098	366	78.8	75	-3.8	0.0365413	0.0949714	1.888	0.879571	1
Solyc09g009690	SL3.0ch09	3079859	3081859	+	480	299	303	274	61.617	52.513	-9.10446	0.00355989	-0.563429	5.94919	0.0783426	1
Solyc09g009780	SL3.0ch09	3260809	3262809	+	101	246	100	433	29.107	18.762	-10.3449	0.00191459	0.316727	4.04715	0.316017	1
Solyc09g009860	SL3.0ch09	3348214	3350214	+	449	273	318	323	62.188	49.61	-12.5784	2.79278e-05	-3.23973	-2.30411	0.061907	1
Solyc09g010030	SL3.0ch09	3448708	3450708	+	96	109	115	228	46.829	33.528	-13.3016	0.00752101	0.14837	4.31309	0.649355	1
Solyc09g010240	SL3.0ch09	3631892	3633892	-	210	506	109	456	29.33	19.292	-10.0376	0.000255635	-0.0310294	-0.704561	1	1
Solyc09g010562	SL3.0ch09	3929667	3931667	+	301	169	297	229	64.043	56.464	-7.57867	0.0401792	0.118098	6.26589	0.726656	1
Solyc09g010780	SL3.0ch09	4073898	4075898	-	726	223	567	255	76.502	68.978	-7.52348	0.00186848	0.56101	1.58748	0.408845	1
Solyc09g010870	SL3.0ch09	4209774	4211774	-	142404	37153	45147	13125	79.309	77.476	-1.8322	3.91144e-19	-0.50327	5.03732	0.102992	1
Solyc09g010913	SL3.0ch09	4249005	4251005	+	125	415	15	455	23.148	3.191	-19.9567	1.3108e-20	-0.215987	0.454243	0.710179	1
Solyc09g010980	SL3.0ch09	4331412	4333412	+	665	405	452	385	62.15	54.002	-8.14714	0.00176577	0.690503	3.91162	0.33817	1
Solyc09g011080	SL3.0ch09	4416638	4418638	-	475	963	274	711	33.032	27.817	-5.21473	0.01879	-1.45603	3.67615	4.48095e-05	0.0106142
Solyc09g011150	SL3.0ch09	4502335	4504335	+	695	772	339	585	47.376	36.688	-10.6873	3.06774e-06	1.7904	-3.29217	1	1
Solyc09g011160	SL3.0ch09	4507298	4509298	+	564	763	369	659	42.502	35.895	-6.60694	0.00486616	-0.00830985	0.489587	1	1
Solyc09g011170	SL3.0ch09	4522300	4524300	-	606	773	456	756	43.945	37.624	-6.32113	0.00468055	-0.0772903	0.749498	0.936554	1
Solyc09g011340	SL3.0ch09	4673065	4675065	+	277	165	164	308	62.67	34.746	-27.9239	9.99528e-16	-0.232308	4.83541	0.442765	1
Solyc09g011490	SL3.0ch09	4811207	4813207	-	465	406	373	412	53.387	47.516	-5.87099	0.0432144	0.944686	0.198558	0.552896	1
Solyc09g011550	SL3.0ch09	4835802	4837802	+	165	403	82	402	29.049	16.942	-12.1071	3.30827e-05	2.91839	3.09007	0.00728096	0.402512
[truncated: 773 more rows]

## Sheet: PHYA_vs_WT_IG_hypermethylated
Supplementary Table 15. Total differentially methylated promoters (DMPs) in CHG context
ID	chr	from	to	strand	met_WT	unmet_WT	met_PHYA	unmet_PHYA	X.met_WT	X.met_PHYA	X.diff_PHYA.ctrl	FDR_diff_PHYA.WT	logFC_PHYA	logCPM_PHYA	PValue_PHYA	padj_PHYA
Solyc00g005060	SL3.0ch00	724013	726013	-	121	22	168	4	84.615	97.674	13.059	0.000261498	0	-3.91086	1	1
Solyc00g005084	SL3.0ch00	807592	809592	+	873	230	718	125	79.148	85.172	6.02423	0.00309608	0	-3.91086	1	1
Solyc00g005092	SL3.0ch00	1125793	1127793	+	351	191	267	103	64.76	72.162	7.40201	0.0482659	0.611399	-1.17336	0.607018	1
Solyc00g005096	SL3.0ch00	1732561	1734561	+	877	346	851	248	71.709	77.434	5.72512	0.00620395	0	-3.91086	1	1
Solyc00g005460	SL3.0ch00	2490753	2492753	-	785	199	879	167	79.776	84.034	4.25799	0.0334058	0	-3.91086	1	1
Solyc00g006020	SL3.0ch00	3943107	3945107	+	999	110	674	35	90.081	95.063	4.98232	0.000674474	0	-3.91086	1	1
Solyc00g005903	SL3.0ch00	4162096	4164096	+	3247	936	3959	961	77.624	80.467	2.84376	0.00378751	0	-3.91086	1	1
Solyc00g005907	SL3.0ch00	4172134	4174134	+	4214	1324	4949	1266	76.092	79.63	3.53748	3.60512e-05	0	-3.91086	1	1
Solyc00g006510	SL3.0ch00	4370359	4372359	+	50	33	72	21	60.241	77.419	17.1784	0.0369579	0	-3.91086	1	1
Solyc00g006650	SL3.0ch00	5617777	5619777	-	423	205	695	167	67.357	80.626	13.2698	1.08347e-07	0	-3.91086	1	1
Solyc00g006655	SL3.0ch00	5619735	5621735	-	373	134	575	142	73.57	80.195	6.62524	0.0197986	0	-3.91086	1	1
Solyc00g006660	SL3.0ch00	5628502	5630502	+	168	83	385	107	66.932	78.252	11.3198	0.00405694	0	-3.91086	1	1
Solyc00g006805	SL3.0ch00	5780749	5782749	-	1284	207	862	94	86.117	90.167	4.05066	0.0101427	2.23226	-2.36692	0.170801	1
Solyc00g006867	SL3.0ch00	6390079	6392079	+	35	859	438	275	3.915	61.431	57.5156	4.27463e-151	-0.716583	-0.558252	0.4393	1
Solyc00g007550	SL3.0ch00	6650039	6652039	-	285	354	310	253	44.601	55.062	10.4612	0.00162764	-4.21041	-3.43053	0.183524	1
Solyc00g008000	SL3.0ch00	6974073	6976073	-	186	87	311	88	68.132	77.945	9.81299	0.0165829	0	-3.91086	1	1
Solyc00g008160	SL3.0ch00	7159867	7161867	-	361	64	492	51	84.941	90.608	5.66656	0.0248557	0	-3.91086	1	1
Solyc00g009020	SL3.0ch00	7793998	7795998	+	1087	316	1104	257	77.477	81.117	3.63999	0.0447429	-0.124234	7.62401	0.62832	1
Solyc00g009050	SL3.0ch00	7822149	7824149	-	1773	609	1936	276	74.433	87.523	13.0894	5.71009e-28	0.660193	-1.83144	0.569434	1
Solyc00g009140	SL3.0ch00	7885380	7887380	+	84	643	107	503	11.554	17.541	5.98665	0.00774346	-1.06502	3.36058	0.0187793	0.657884
Solyc00g009141	SL3.0ch00	7897016	7899016	-	473	90	478	54	84.014	89.85	5.83541	0.0164651	-0.0625573	4.45932	0.834802	1
Solyc00g009142	SL3.0ch00	8038913	8040913	+	1642	370	1990	362	81.61	84.609	2.99851	0.0254217	0	-3.91086	1	1
Solyc00g009148	SL3.0ch00	8298357	8300357	+	993	355	1360	368	73.665	78.704	5.03902	0.00450351	0	-3.91086	1	1
Solyc06g024330	SL3.0ch00	8833977	8835977	+	1464	348	1776	342	80.795	83.853	3.05799	0.0334414	0	-3.91086	1	1
Solyc00g010530	SL3.0ch00	8854847	8856847	-	33109	7733	10396	2242	81.066	82.26	1.19379	0.00886973	1.02225	-2.83969	0.517543	1
Solyc00g010930	SL3.0ch00	9019959	9021959	+	2033	544	2000	381	78.89	83.998	5.10814	3.48138e-05	0	-3.91086	1	1
Solyc00g011175	SL3.0ch00	9159658	9161658	+	284	150	456	151	65.438	75.124	9.68577	0.00358519	0	-3.91086	1	1
Solyc00g011870	SL3.0ch00	9381599	9383599	-	1194	158	1110	86	88.314	92.809	4.49576	0.000647575	0	-3.91086	1	1
Solyc00g011880	SL3.0ch00	9382471	9384471	+	1087	152	1072	68	87.732	94.035	6.30305	1.05933e-06	-0.215141	3.70834	0.569852	1
Solyc00g011895	SL3.0ch00	9476079	9478079	+	1325	556	1689	518	70.441	76.529	6.08797	8.58507e-05	0	-3.91086	1	1
Solyc00g012700	SL3.0ch00	9627415	9629415	-	928	331	933	228	73.709	80.362	6.65246	0.000625218	0	-3.91086	1	1
Solyc00g012704	SL3.0ch00	9696804	9698804	-	3926	1669	4366	1416	70.17	75.51	5.34041	3.03049e-09	0	-3.86689	1	1
Solyc00g012708	SL3.0ch00	9708087	9710087	-	2329	677	2548	640	77.478	79.925	2.44634	0.0462769	0	-3.91086	1	1
Solyc00g013110	SL3.0ch00	9719089	9721089	-	258	2069	233	1176	11.087	16.537	5.44931	2.18793e-05	0	-3.91086	1	1
Solyc00g013120	SL3.0ch00	9726388	9728388	-	326	1445	297	777	18.408	27.654	9.24595	1.54242e-07	-2.56745	-3.0418	0.622599	1
Solyc00g013130	SL3.0ch00	9727452	9729452	-	619	6143	611	3602	9.154	14.503	5.34863	5.76267e-16	4.3203	-3.50607	0.210152	1
Solyc00g013133	SL3.0ch00	9727784	9729784	-	855	7903	869	4772	9.763	15.405	5.64257	4.99193e-22	1.79071	-3.38388	1	1
Solyc00g013137	SL3.0ch00	9730078	9732078	-	426	1277	444	770	25.015	36.573	11.5586	5.58098e-10	1.78517	-3.78951	1	1
Solyc00g013140	SL3.0ch00	9737602	9739602	-	1587	17802	1377	12154	8.185	10.177	1.99158	1.18422e-08	-1.42289	-1.03249	0.143394	1
Solyc00g013150	SL3.0ch00	9736648	9738648	+	1524	26425	1652	17729	5.453	8.524	3.07102	1.26454e-36	1.9493	-2.82133	0.252768	1
Solyc00g013155	SL3.0ch00	9739388	9741388	-	641	7965	518	4945	7.448	9.482	2.03368	0.000166172	1.65604	-3.15174	0.621835	1
Solyc00g013160	SL3.0ch00	9741809	9743809	-	1255	16184	1062	9351	7.197	10.199	3.00228	1.66001e-16	-0.436295	-1.09184	0.683674	1
Solyc00g013170	SL3.0ch00	9740381	9742381	+	1221	14418	987	8716	7.807	10.172	2.36471	2.54576e-09	1.38394	-1.39935	0.287353	1
Solyc00g013180	SL3.0ch00	9744467	9746467	-	1115	14587	1039	7583	7.101	12.051	4.94956	3.16507e-35	2.99835	-2.83542	0.040301	0.92581
Solyc00g013183	SL3.0ch00	9797940	9799940	-	517	168	613	132	75.474	82.282	6.80743	0.00659242	0	-3.91086	1	1
Solyc00g014170	SL3.0ch00	9966728	9968728	+	640	391	767	292	62.076	72.427	10.3512	4.79236e-06	0	-3.91086	1	1
Solyc00g014290	SL3.0ch00	10010691	10012691	-	916	198	974	120	82.226	89.031	6.80487	4.21187e-05	0	-3.91086	1	1
Solyc00g015737	SL3.0ch00	10361092	10363092	-	1678	628	1918	566	72.767	77.214	4.44748	0.00186173	0	-3.91086	1	1
Solyc00g016790	SL3.0ch00	10444493	10446493	+	2766	885	2826	720	75.76	79.695	3.93537	0.000392344	0	-3.91086	1	1
Solyc00g017235	SL3.0ch00	10541075	10543075	+	344	79	740	105	81.324	87.574	6.25009	0.012715	0	-3.91086	1	1
Solyc00g017550	SL3.0ch00	10562435	10564435	+	1106	274	1011	179	80.145	84.958	4.81306	0.00577634	0	-3.91086	1	1
Solyc00g017760	SL3.0ch00	10585381	10587381	-	3503	1095	3586	942	76.185	79.196	3.01082	0.00255478	0	-3.91086	1	1
Solyc00g017937	SL3.0ch00	10634988	10636988	+	1433	288	1113	146	83.266	88.403	5.13795	0.000465814	0	-3.91086	1	1
Solyc00g019620	SL3.0ch00	10819131	10821131	-	1109	10037	946	7213	9.95	11.595	1.6448	0.00136845	0	-3.91086	1	1
Solyc00g019630	SL3.0ch00	10819968	10821968	-	3176	45093	2333	27028	6.58	7.946	1.36612	2.39144e-11	0	-3.91086	1	1
Solyc00g019730	SL3.0ch00	10829313	10831313	-	1292	16070	1344	12621	7.442	9.624	2.18252	1.30108e-10	0.391827	-2.0331	0.799516	1
Solyc00g019740	SL3.0ch00	10830415	10832415	-	1576	21894	1905	17848	6.715	9.644	2.92915	8.2599e-27	1.16189	-1.30025	0.455904	1
Solyc00g019750	SL3.0ch00	10831749	10833749	-	568	6714	668	5225	7.8	11.335	3.53543	1.22832e-10	4.76093	-3.27884	0.1375	1
Solyc00g020010	SL3.0ch00	10853344	10855344	-	1517	20927	1303	12292	6.759	9.584	2.82536	5.42837e-20	3.15341	-3.39345	0.432078	1
Solyc00g020030	SL3.0ch00	10854853	10856853	-	1513	20002	1348	12985	7.032	9.405	2.37257	2.78051e-14	0	-3.91086	1	1
Solyc00g020040	SL3.0ch00	10854013	10856013	+	2035	24734	1781	15057	7.602	10.577	2.97519	1.96585e-24	4.13842	-2.8213	0.189607	1
Solyc00g021655	SL3.0ch00	11037440	11039440	+	723	174	837	148	80.602	84.975	4.37261	0.0313964	0	-3.91086	1	1
Solyc00g022070	SL3.0ch00	11051610	11053610	+	2034	12556	1474	7933	13.941	15.669	1.72813	0.0011644	0	-3.87283	1	1
Solyc00g023470	SL3.0ch00	11174287	11176287	+	1804	443	1519	292	80.285	83.876	3.59149	0.0105992	0	-3.91086	1	1
Solyc00g023710	SL3.0ch00	11199671	11201671	-	434	7567	519	4726	5.424	9.895	4.47082	4.50329e-20	1.78813	-3.87428	1	1
Solyc00g024040	SL3.0ch00	11224494	11226494	-	321	448	332	300	41.743	52.532	10.7891	0.000405668	0	-3.91086	1	1
Solyc00g024150	SL3.0ch00	11224558	11226558	+	327	639	334	406	33.851	45.135	11.2842	2.10392e-05	-0.60403	5.42107	0.070017	1
Solyc00g025290	SL3.0ch00	11313892	11315892	+	861	11914	972	7241	6.74	11.835	5.09517	3.08335e-34	1.69592	-1.17448	0.360159	1
Solyc00g025300	SL3.0ch00	11317263	11319263	-	1263	15768	1186	9712	7.416	10.883	3.46684	2.52806e-21	3.37047	-3.77034	0.530747	1
Solyc00g027970	SL3.0ch00	11488487	11490487	+	1703	420	1601	320	80.217	83.342	3.12533	0.0277553	0	-3.91086	1	1
Solyc00g028550	SL3.0ch00	11530930	11532930	-	224	245	308	181	47.761	62.986	15.2245	2.36085e-05	0	-3.91086	1	1
Solyc00g028560	SL3.0ch00	11532006	11534006	-	564	296	594	222	65.581	72.794	7.21272	0.00571005	0	-3.91086	1	1
Solyc00g028760	SL3.0ch00	11537778	11539778	+	1716	409	1517	280	80.753	84.418	3.66553	0.00955326	0	-3.91086	1	1
Solyc00g030000	SL3.0ch00	11624489	11626489	-	549	921	966	912	37.347	51.438	14.0908	1.48199e-14	0	-3.47695	1	1
Solyc00g030100	SL3.0ch00	11623845	11625845	+	1118	876	1885	1175	56.068	61.601	5.5331	0.000557065	3.84966	-3.62704	0.240531	1
Solyc00g031500	SL3.0ch00	11714108	11716108	-	773	113	537	51	87.246	91.327	4.08048	0.0359488	0	-3.91086	1	1
Solyc00g032030	SL3.0ch00	11739712	11741712	-	997	210	961	124	82.601	88.571	5.96994	0.000332066	0	-3.91086	1	1
Solyc00g032035	SL3.0ch00	11769366	11771366	-	1927	1022	1509	665	65.344	69.411	4.06704	0.008383	0	-3.91086	1	1
Solyc00g032943	SL3.0ch00	11803226	11805226	+	2770	941	3067	824	74.643	78.823	4.17997	0.000124607	0	-3.91086	1	1
Solyc00g036962	SL3.0ch00	12097734	12099734	-	1018	409	1212	394	71.338	75.467	4.12853	0.0282978	0	-3.91086	1	1
Solyc00g036964	SL3.0ch00	12099416	12101416	-	492	214	707	201	69.688	77.863	8.17505	0.00119863	0	-3.87049	1	1
Solyc00g039990	SL3.0ch00	12187866	12189866	-	147	84	170	46	63.636	78.704	15.0673	0.00251113	0.173119	-1.9307	1	1
Solyc00g040390	SL3.0ch00	12201979	12203979	+	171	280	203	174	37.916	53.846	15.9304	4.12516e-05	0	-3.91086	1	1
Solyc00g042840	SL3.0ch00	12334757	12336757	-	191	642	204	509	22.929	28.612	5.68233	0.0310077	0.308229	0.778337	0.6881	1
Solyc00g042854	SL3.0ch00	12376717	12378717	+	467	517	441	336	47.459	56.757	9.29741	0.000674166	0	-3.91086	1	1
Solyc00g044350	SL3.0ch00	12409306	12411306	+	486	230	631	183	67.877	77.518	9.64133	0.000167991	-3.15666	-0.571401	0.0162257	0.613497
Solyc00g044550	SL3.0ch00	12421120	12423120	+	482	4548	406	2919	9.583	12.211	2.62802	0.0008595	0	-3.91086	1	1
Solyc00g049210	SL3.0ch00	12653666	12655666	-	175	5742	173	4036	2.958	4.11	1.15266	0.0069931	1.8679	-3.03956	0.437052	1
Solyc00g049520	SL3.0ch00	12668662	12670662	-	6	66	31	64	8.333	32.632	24.2982	0.000788378	-0.225031	4.8933	0.673163	1
Solyc00g057880	SL3.0ch00	13059178	13061178	+	1866	526	2659	424	78.01	86.247	8.23713	6.51511e-14	0.168909	2.53643	0.722844	1
Solyc00g058480	SL3.0ch00	13089903	13091903	-	193	106	178	62	64.548	74.167	9.61817	0.0453039	0	-3.91086	1	1
Solyc07g021600	SL3.0ch00	13287270	13289270	+	1263	174	1212	122	87.891	90.855	2.96313	0.0306204	0	-3.91086	1	1
Solyc00g063110	SL3.0ch00	13302234	13304234	-	2084	1326	2079	1056	61.114	66.316	5.20142	0.000101141	0	-3.91086	1	1
Solyc00g063510	SL3.0ch00	13319570	13321570	-	394	87	348	49	81.913	87.657	5.74475	0.045545	0	-3.91086	1	1
Solyc00g066350	SL3.0ch00	13437927	13439927	+	507	843	426	493	37.556	46.355	8.79918	0.000200925	0	-3.91086	1	1
Solyc00g066155	SL3.0ch00	13437927	13439927	+	507	843	426	493	37.556	46.355	8.79918	0.000200925	0	-3.91086	1	1
Solyc00g068985	SL3.0ch00	13563019	13565019	-	445	105	481	73	80.909	86.823	5.91401	0.0241755	0	-3.91086	1	1
Solyc01g058600	SL3.0ch00	13582322	13584322	+	258	509	288	396	33.638	42.105	8.46771	0.00384057	0	-3.91086	1	1
Solyc00g069880	SL3.0ch00	13590952	13592952	+	757	5975	1136	3952	11.245	22.327	11.0822	1.89645e-56	0	-3.91086	1	1
Solyc00g069883	SL3.0ch00	13619826	13621826	+	98	51	207	41	65.772	83.468	17.6959	0.000453916	0	-3.91086	1	1
Solyc00g072800	SL3.0ch00	13717078	13719078	+	448	20182	359	13479	2.172	2.594	0.422711	0.0315411	0	-3.91086	1	1
Solyc00g074830	SL3.0ch00	13805809	13807809	-	460	54	476	24	89.494	95.2	5.70584	0.00360393	0	-3.91086	1	1
Solyc00g075030	SL3.0ch00	13808149	13810149	+	425	151	458	93	73.785	83.122	9.33687	0.000869809	0	-3.91086	1	1
Solyc06g050455	SL3.0ch00	14042395	14044395	-	1605	576	1831	559	73.59	76.611	3.02078	0.0462315	0	-3.91086	1	1
Solyc00g090430	SL3.0ch00	14430232	14432232	+	2897	776	4996	597	78.873	89.326	10.4531	1.73129e-40	-3.17311	-3.76012	0.389779	1
Solyc00g090650	SL3.0ch00	14441347	14443347	-	406	102	460	49	79.921	90.373	10.452	2.25873e-05	0	-3.91086	1	1
Solyc00g090660	SL3.0ch00	14441661	14443661	-	422	111	512	51	79.174	90.941	11.7669	4.8835e-07	0	-3.91086	1	1
Solyc00g092870	SL3.0ch00	14521606	14523606	+	3791	1216	4555	1171	75.714	79.549	3.83542	1.84179e-05	0	-3.91086	1	1
Solyc00g094020	SL3.0ch00	14571243	14573243	-	816	206	809	122	79.843	86.896	7.05237	0.000232871	0	-3.91086	1	1
Solyc00g094540	SL3.0ch00	14584899	14586899	+	751	16512	745	9887	4.35	7.007	2.6568	2.10287e-19	1.3738	-3.06611	0.566386	1
Solyc00g094550	SL3.0ch00	14588391	14590391	-	313	4824	284	3217	6.093	8.112	2.01892	0.00160443	0	-3.91086	1	1
Solyc00g097260	SL3.0ch00	14687968	14689968	+	1314	415	1453	360	75.998	80.143	4.14572	0.0101512	0	-3.67847	1	1
Solyc00g097960	SL3.0ch00	14713567	14715567	+	117	166	101	86	41.343	54.011	12.6679	0.0228708	-0.331989	0.756639	0.627113	1
Solyc00g104330	SL3.0ch00	14948892	14950892	-	1067	1512	1211	1324	41.373	47.771	6.39858	3.70792e-05	0	-3.91086	1	1
Solyc00g110370	SL3.0ch00	15166354	15168354	-	508	813	478	601	38.456	44.3	5.84456	0.012894	1.78551	-3.80122	1	1
Solyc00g112505	SL3.0ch00	15242310	15244310	-	5263	1473	4628	1091	78.132	80.923	2.79082	0.000718747	0	-3.91086	1	1
Solyc00g112600	SL3.0ch00	15244053	15246053	-	1874	517	2010	441	78.377	82.007	3.6301	0.00627861	0	-3.91086	1	1
Solyc00g112700	SL3.0ch00	15242886	15244886	+	6119	1745	5747	1308	77.81	81.46	3.64968	4.61951e-07	0	-3.91086	1	1
Solyc00g112930	SL3.0ch00	15254586	15256586	-	3118	635	2956	486	83.08	85.88	2.8001	0.00452222	0.572143	1.28323	0.442571	1
Solyc00g123240	SL3.0ch00	15592269	15594269	+	455	142	532	107	76.214	83.255	7.04068	0.00801908	0	-3.91086	1	1
Solyc00g126000	SL3.0ch00	15683423	15685423	+	600	17618	470	11594	3.293	3.896	0.602443	0.0171174	-0.149921	-2.24814	1	1
Solyc00g126010	SL3.0ch00	15683740	15685740	+	525	17369	426	11418	2.934	3.597	0.662814	0.00585242	-0.322317	-1.72909	0.865637	1
Solyc00g127670	SL3.0ch00	15736452	15738452	-	769	910	891	682	45.801	56.643	10.8423	1.10797e-08	-0.274065	2.41383	0.512339	1
Solyc00g127870	SL3.0ch00	15737888	15739888	+	260	1525	309	1422	14.566	17.851	3.28513	0.0248167	-0.104477	2.63402	0.84413	1
Solyc00g128870	SL3.0ch00	15771534	15773534	+	107	84	195	55	56.021	78	21.9791	9.98337e-06	0.257484	3.49961	0.500331	1
Solyc00g129670	SL3.0ch00	15797766	15799766	+	587	97	505	48	85.819	91.32	5.50136	0.0108412	0	-3.91086	1	1
Solyc00g130810	SL3.0ch00	15839293	15841293	-	293	58	242	25	83.476	90.637	7.16092	0.0313741	0	-3.91086	1	1
Solyc00g131610	SL3.0ch00	15863687	15865687	-	426	266	478	186	61.561	71.988	10.4273	0.000334396	0	-3.91086	1	1
Solyc00g136260	SL3.0ch00	16015399	16017399	-	16	196	56	152	7.547	26.923	19.3759	1.40145e-06	0.0786932	4.73268	0.869079	1
Solyc00g139760	SL3.0ch00	16128726	16130726	-	4540	391	4926	350	92.071	93.366	1.29561	0.0308482	0	-3.91086	1	1
Solyc00g142170	SL3.0ch00	16203631	16205631	-	764	14026	828	9181	5.166	8.273	3.1069	1.95634e-20	0	-3.69284	1	1
Solyc00g142160	SL3.0ch00	16203089	16205089	-	1114	19075	1118	12496	5.518	8.212	2.69428	2.01951e-20	0	-3.86883	1	1
Solyc00g145170	SL3.0ch00	16295400	16297400	+	1732	431	1459	280	80.074	83.899	3.82482	0.00816979	-3.23325	-3.72617	0.466929	1
Solyc00g153980	SL3.0ch00	16568348	16570348	+	658	10625	628	6741	5.832	8.522	2.69041	5.22273e-11	0	-3.86959	1	1
Solyc00g154480	SL3.0ch00	16585756	16587756	+	863	263	687	159	76.643	81.206	4.56269	0.0366796	0	-3.91086	1	1
Solyc00g157080	SL3.0ch00	16661033	16663033	+	532	764	555	642	41.049	46.366	5.31653	0.0217697	0	-3.91086	1	1
Solyc00g160785	SL3.0ch00	16794746	16796746	-	493	125	556	78	79.773	87.697	7.9237	0.000873647	0	-3.91086	1	1
Solyc00g164580	SL3.0ch00	16884713	16886713	+	119	1931	199	1259	5.805	13.649	7.84396	1.1872e-13	1.81213	-3.69127	1	1
Solyc00g164680	SL3.0ch00	16887526	16889526	+	741	18212	679	12938	3.91	4.986	1.07674	2.78474e-05	0.234465	3.66247	0.598658	1
Solyc00g167800	SL3.0ch00	16979826	16981826	+	776	155	752	106	83.351	87.646	4.29445	0.0288159	0	-3.91086	1	1
Solyc00g170200	SL3.0ch00	17048326	17050326	+	183	143	232	93	56.135	71.385	15.2496	0.00037993	1.78017	-3.71946	1	1
Solyc00g171810	SL3.0ch00	17098009	17100009	-	90	6791	631	4552	1.308	12.174	10.8665	6.91378e-143	0.937362	1.65316	0.119718	1
Solyc00g174330	SL3.0ch00	17167463	17169463	-	692	174	816	98	79.908	89.278	9.37028	4.94813e-07	2.16107	2.19195	0.0966035	1
Solyc00g181240	SL3.0ch00	17363185	17365185	-	962	21529	867	14891	4.277	5.502	1.2247	5.3161e-07	0	-3.6317	1	1
Solyc00g183555	SL3.0ch00	17426037	17428037	+	231	37	206	16	86.194	92.793	6.59876	0.0463118	0	-3.91086	1	1
Solyc00g185750	SL3.0ch00	17490434	17492434	-	197	230	211	177	46.136	54.381	8.24561	0.0478281	0	-3.91086	1	1
Solyc00g188855	SL3.0ch00	17751239	17753239	+	466	173	436	118	72.926	78.7	5.77391	0.0494944	0	-3.91086	1	1
Solyc00g195360	SL3.0ch00	17751902	17753902	+	777	212	674	132	78.564	83.623	5.05862	0.0196163	0	-3.8258	1	1
Solyc00g203660	SL3.0ch00	17977333	17979333	-	361	964	359	624	27.245	36.521	9.27557	1.99611e-05	0.721862	-0.371376	0.505969	1
Solyc00g212265	SL3.0ch00	18208150	18210150	+	1239	322	1348	192	79.372	87.532	8.16027	1.69434e-08	0	-3.91086	1	1
Solyc00g217560	SL3.0ch00	18339728	18341728	+	93	430	534	649	17.782	45.139	27.3574	6.24799e-27	0	-3.91086	1	1
Solyc00g218560	SL3.0ch00	18367559	18369559	-	4188	803	4982	620	83.911	88.933	5.02148	1.26663e-12	0	-3.82402	1	1
Solyc00g222060	SL3.0ch00	18456008	18458008	+	1334	526	1595	515	71.72	75.592	3.87199	0.0178899	0	-3.91086	1	1
Solyc00g227960	SL3.0ch00	18606154	18608154	+	1	52	73	21	1.887	77.66	75.7728	1.12675e-19	0	-3.91086	1	1
Solyc00g230070	SL3.0ch00	18661095	18663095	-	1234	26399	1030	16248	4.466	5.961	1.49566	7.42535e-11	-3.96417	-2.95418	0.172683	1
Solyc00g231680	SL3.0ch00	18701854	18703854	-	1337	2287	1152	1500	36.893	43.439	6.54598	1.95802e-06	-4.16386	-3.62281	0.295476	1
Solyc00g244290	SL3.0ch00	19010831	19012831	+	523	11992	430	7754	4.179	5.254	1.07517	0.00174331	-0.405757	-1.54516	0.802014	1
Solyc00g249910	SL3.0ch00	19146953	19148953	+	0	10	1660	204	0	89.056	89.0558	5.64401e-09	1.17502	-3.19092	0.61525	1
Solyc00g269810	SL3.0ch00	19619201	19621201	-	1176	265	1269	198	81.61	86.503	4.89307	0.00155201	0	-3.91086	1	1
Solyc00g275310	SL3.0ch00	19745967	19747967	-	769	124	637	36	86.114	94.651	8.5366	2.39093e-07	0	-3.91086	1	1
Solyc03g033920	SL3.0ch00	19875093	19877093	-	104	3445	380	2525	2.93	13.081	10.1505	1.22709e-52	0	-3.91086	1	1
Solyc00g281110	SL3.0ch00	19877327	19879327	-	126	5404	115	3606	2.278	3.091	0.812086	0.0460031	0	-3.67847	1	1
Solyc00g282510	SL3.0ch00	19908568	19910568	+	939	182	1066	135	83.764	88.759	4.99487	0.00247292	0	-3.91086	1	1
Solyc00g308930	SL3.0ch00	20493455	20495455	-	1759	263	1668	186	86.993	89.968	2.97456	0.013287	0	-3.91086	1	1
Solyc00g309530	SL3.0ch00	20503857	20505857	+	470	1853	542	1633	20.232	24.92	4.68708	0.000927091	0	-3.91086	1	1
Solyc00g320430	SL3.0ch00	20737048	20739048	+	555	5076	553	4009	9.856	12.122	2.26572	0.00146533	3.5963	-3.27111	0.428771	1
Solyc00g322635	SL3.0ch00	20793648	20795648	+	1228	499	1342	429	71.106	75.776	4.67043	0.0069931	-1.91433	-3.87151	1	1
Solyc01g005010	SL3.0ch01	21061	23061	+	601	341	609	242	63.8	71.563	7.76244	0.00224863	-0.188518	1.58303	0.812626	1
Solyc01g005080	SL3.0ch01	73169	75169	-	145	478	224	443	23.274	33.583	10.3087	0.000291356	-0.0882511	3.48798	0.87775	1
Solyc01g005480	SL3.0ch01	330990	332990	+	1081	149	1180	108	87.886	91.615	3.72873	0.00845179	-0.0430485	2.97566	0.917575	1
Solyc01g005650	SL3.0ch01	457261	459261	-	445	298	534	270	59.892	66.418	6.52558	0.0232935	0	-3.91086	1	1
Solyc01g005740	SL3.0ch01	494469	496469	-	349	563	423	503	38.268	45.68	7.4128	0.00511271	0	-3.91086	1	1
Solyc01g005755	SL3.0ch01	494500	496500	+	349	540	423	478	39.258	46.948	7.69024	0.00463237	-1.40319	-3.64192	0.772236	1
Solyc01g005760	SL3.0ch01	494506	496506	+	349	540	423	478	39.258	46.948	7.69024	0.00463237	0.746646	4.73237	0.234936	1
Solyc01g005980	SL3.0ch01	652114	654114	-	503	693	540	511	42.057	51.38	9.32278	7.83117e-05	-0.070219	2.94093	0.869672	1
Solyc01g006010	SL3.0ch01	668647	670647	+	571	393	616	235	59.232	72.385	13.1531	5.97127e-08	0.125371	4.21254	0.754069	1
Solyc01g006060	SL3.0ch01	735073	737073	+	429	285	536	226	60.084	70.341	10.2572	0.000254559	-1.82447	-3.51211	0.634397	1
Solyc01g006150	SL3.0ch01	801691	803691	-	570	822	543	634	40.948	46.134	5.18596	0.0234363	-0.606379	4.56318	0.118592	1
Solyc01g006160	SL3.0ch01	807962	809962	-	60	984	89	732	5.747	10.84	5.09331	0.000414406	0.306121	7.82334	0.327291	1
Solyc01g006250	SL3.0ch01	864064	866064	-	1056	162	1015	115	86.7	89.823	3.1235	0.0485177	0.150848	1.7532	0.758058	1
Solyc01g006280	SL3.0ch01	871778	873778	+	266	611	266	448	30.331	37.255	6.92423	0.0126567	-0.34669	7.70616	0.274347	1
Solyc01g006340	SL3.0ch01	912902	914902	+	918	489	846	293	65.245	74.276	9.03048	9.74619e-06	-0.0998144	3.00127	0.803711	1
Solyc01g006350	SL3.0ch01	945512	947512	-	15	713	48	617	2.06	7.218	5.15761	3.09186e-05	-0.0561441	6.3271	0.828375	1
Solyc01g006510	SL3.0ch01	1091446	1093446	+	315	386	360	335	44.936	51.799	6.86276	0.0308932	0.125774	6.26423	0.643629	1
Solyc01g006560	SL3.0ch01	1132896	1134896	-	674	744	538	404	47.532	57.113	9.58079	4.47788e-05	-1.47297	-0.819997	0.1075	1
Solyc01g006580	SL3.0ch01	1185045	1187045	-	480	910	552	815	34.532	40.38	5.84802	0.00611812	1.91685	-3.09303	0.411578	1
Solyc01g006650	SL3.0ch01	1242768	1244768	+	178	201	185	114	46.966	61.873	14.9072	0.00077095	-1.2558	-0.877915	0.378114	1
Solyc01g006750	SL3.0ch01	1341810	1343810	+	1331	1811	1226	1129	42.362	52.059	9.69789	2.89861e-11	0	-3.91086	1	1
Solyc01g006755	SL3.0ch01	1344209	1346209	-	603	660	594	483	47.743	55.153	7.40974	0.00173174	0	-3.91086	1	1
Solyc01g006780	SL3.0ch01	1360056	1362056	-	796	694	683	350	53.423	66.118	12.6953	3.34739e-09	-0.525192	-1.86124	0.751351	1
Solyc01g006790	SL3.0ch01	1358218	1360218	+	632	221	609	149	74.091	80.343	6.25157	0.0101845	-1.23585	-0.794035	0.164585	1
Solyc01g006960	SL3.0ch01	1539151	1541151	-	772	435	661	220	63.96	75.028	11.0681	8.05229e-07	0.151261	5.44206	0.574469	1
Solyc01g006970	SL3.0ch01	1539025	1541025	+	771	348	661	220	68.901	75.028	6.12757	0.0093919	0.574819	5.18677	0.0844491	1
Solyc01g007070	SL3.0ch01	1605813	1607813	-	355	824	392	639	30.11	38.021	7.91108	0.000596215	-0.032186	7.62231	0.907037	1
Solyc01g007210	SL3.0ch01	1776170	1778170	+	319	239	265	137	57.168	65.92	8.75194	0.0209592	0	-3.44584	1	1
Solyc01g007250	SL3.0ch01	1812614	1814614	-	279	258	410	258	51.955	61.377	9.42194	0.00423756	0.167342	4.54561	0.582562	1
Solyc01g007270	SL3.0ch01	1834160	1836160	+	439	1117	419	852	28.213	32.966	4.7528	0.0194761	0	-3.91086	1	1
Solyc01g007940	SL3.0ch01	2064704	2066704	-	1467	238	1650	168	86.041	90.759	4.71802	0.000103573	-2.1335	-1.44042	0.0648188	1
Solyc01g008030	SL3.0ch01	2127601	2129601	+	605	555	708	492	52.155	59	6.84483	0.00377052	1.07461	-3.69242	0.820614	1
Solyc01g008070	SL3.0ch01	2145601	2147601	+	299	846	431	876	26.114	32.976	6.86274	0.00120946	0.167849	5.52435	0.637808	1
Solyc01g008090	SL3.0ch01	2163677	2165677	-	684	572	610	362	54.459	62.757	8.2986	0.000481191	0.140259	7.32873	0.687439	1
Solyc01g008115	SL3.0ch01	2178244	2180244	-	333	534	297	282	38.408	51.295	12.887	1.32365e-05	0	-3.91086	1	1
Solyc01g008130	SL3.0ch01	2206896	2208896	+	315	203	400	137	60.811	74.488	13.6771	1.84004e-05	0.285368	3.82397	0.476048	1
Solyc01g008150	SL3.0ch01	2236938	2238938	-	22	206	32	107	9.649	23.022	13.3725	0.00310623	-0.531134	-2.52007	1	1
Solyc01g008160	SL3.0ch01	2239912	2241912	-	379	363	407	242	51.078	62.712	11.6337	0.000103894	-0.302097	4.02135	0.439689	1
Solyc01g008270	SL3.0ch01	2318489	2320489	+	848	864	731	605	49.533	54.716	5.18286	0.0152219	0.438373	4.81923	0.161288	1
Solyc01g008290	SL3.0ch01	2329217	2331217	+	457	934	444	716	32.854	38.276	5.4218	0.0146279	0.186707	3.61434	0.619175	1
Solyc01g008330	SL3.0ch01	2381098	2383098	+	161	451	171	275	26.307	38.341	12.0336	0.000262578	-0.451405	5.78318	0.220474	1
Solyc01g008350	SL3.0ch01	2405142	2407142	+	277	519	373	383	34.799	49.339	14.5396	1.12779e-07	-0.671692	-0.149113	0.374928	1
Solyc01g008360	SL3.0ch01	2407027	2409027	+	346	951	401	762	26.677	34.48	7.80285	0.00019855	0.223455	5.99301	0.439313	1
Solyc01g008472	SL3.0ch01	2491378	2493378	+	267	214	552	337	55.509	62.092	6.58288	0.0430728	0	-3.91086	1	1
Solyc01g008480	SL3.0ch01	2500548	2502548	+	885	513	1369	550	63.305	71.339	8.03452	1.08698e-05	0.12575	3.67507	0.782813	1
Solyc01g008510	SL3.0ch01	2550948	2552948	+	787	90	675	39	89.738	94.538	4.80007	0.00202424	0.674952	3.11352	0.35448	1
Solyc01g008570	SL3.0ch01	2605315	2607315	-	750	271	923	169	73.457	84.524	11.0664	7.49999e-09	0	-3.91086	1	1
Solyc01g008780	SL3.0ch01	2750196	2752196	+	1162	390	1135	307	74.871	78.71	3.83899	0.0345123	-0.0912577	5.57392	0.744956	1
Solyc01g008830	SL3.0ch01	2786576	2788576	+	620	198	611	117	75.795	83.929	8.13395	0.000494535	-1.11973	0.328201	0.141673	1
Solyc01g008925	SL3.0ch01	2875840	2877840	+	201	396	274	375	33.668	42.219	8.55046	0.00720611	-0.941952	1.82319	0.0944241	1
Solyc01g009030	SL3.0ch01	2958105	2960105	+	539	356	587	307	60.223	65.66	5.43649	0.0443598	0.140533	5.17021	0.595156	1
Solyc01g009245	SL3.0ch01	3211020	3213020	-	819	1840	613	1096	30.801	35.869	5.06788	0.00237436	-1.4319	1.75047	0.0434455	0.95675
Solyc01g009260	SL3.0ch01	3220496	3222496	+	684	351	569	220	66.087	72.117	6.02965	0.0178067	-0.963133	-3.23619	1	1
Solyc01g009300	SL3.0ch01	3279040	3281040	-	729	783	753	617	48.214	54.964	6.74922	0.00146533	0.126879	5.273	0.69818	1
Solyc01g009335	SL3.0ch01	3463891	3465891	+	807	140	747	93	85.216	88.929	3.7121	0.04721	-4.36186	-3.53624	0.178607	1
Solyc01g009450	SL3.0ch01	3615767	3617767	-	569	578	645	413	49.608	60.964	11.3564	1.01823e-06	-0.020885	7.02751	0.938034	1
Solyc01g009500	SL3.0ch01	3671459	3673459	+	455	425	467	315	51.705	59.719	8.01412	0.00441348	0.170857	3.14389	0.665436	1
Solyc01g009540	SL3.0ch01	3717705	3719705	+	309	880	369	620	25.988	37.31	11.3222	2.40449e-07	0	-3.91086	1	1
Solyc01g009590	SL3.0ch01	3766335	3768335	-	894	543	903	432	62.213	67.64	5.42751	0.0097162	0	-3.91086	1	1
Solyc01g009635	SL3.0ch01	3815307	3817307	-	551	434	550	330	55.939	62.5	6.56091	0.0129791	0	-3.91086	1	1
Solyc01g009650	SL3.0ch01	3819523	3821523	+	317	321	349	239	49.687	59.354	9.66722	0.00307055	0	-3.87229	1	1
Solyc01g009645	SL3.0ch01	3819590	3821590	+	317	321	349	239	49.687	59.354	9.66722	0.00307055	0	-3.91086	1	1
Solyc01g009710	SL3.0ch01	3919295	3921295	+	1327	526	1039	340	71.614	75.344	3.73085	0.0427285	0.806184	-2.09358	0.45132	1
Solyc01g009740	SL3.0ch01	4038809	4040809	-	173	314	218	283	35.524	43.513	7.98936	0.0295567	0	-3.91086	1	1
Solyc01g009810	SL3.0ch01	4183116	4185116	+	1811	235	1535	142	88.514	91.532	3.01832	0.00915002	10.4758	0.898053	9.10703e-05	0.0179733
Solyc01g009870	SL3.0ch01	4342363	4344363	-	818	658	710	395	55.42	64.253	8.83334	5.48876e-05	-0.275932	5.90475	0.703147	1
Solyc01g009970	SL3.0ch01	4513148	4515148	-	409	513	392	389	44.36	50.192	5.83197	0.0411244	-0.344677	4.689	0.266754	1
Solyc01g010087	SL3.0ch01	4771475	4773475	+	1613	129	1773	101	92.595	94.61	2.01574	0.0353604	0	-3.91086	1	1
Solyc01g010140	SL3.0ch01	4819924	4821924	-	138	685	203	740	16.768	21.527	4.75912	0.0336352	-1.91432	-3.87151	1	1
Solyc01g010160	SL3.0ch01	4885380	4887380	-	2323	189	1876	101	92.476	94.891	2.41513	0.00461179	0	1.27981	1	1
Solyc01g010210	SL3.0ch01	4926330	4928330	+	766	6449	631	4302	10.617	12.791	2.17463	0.0013183	0	-3.91086	1	1
Solyc01g010270	SL3.0ch01	5003409	5005409	-	1024	870	874	606	54.065	59.054	4.98858	0.0132169	-0.017111	6.90059	0.964447	1
Solyc01g010280	SL3.0ch01	5017979	5019979	-	555	469	498	204	54.199	70.94	16.741	4.37754e-11	0	-3.91086	1	1
Solyc01g010393	SL3.0ch01	5204802	5206802	+	215	282	106	89	43.26	54.359	11.0994	0.0242444	0	-3.91086	1	1
Solyc01g010430	SL3.0ch01	5281639	5283639	+	791	757	961	719	51.098	57.202	6.10419	0.00239029	0.321014	6.79427	0.569116	1
Solyc01g010460	SL3.0ch01	5298821	5300821	+	784	733	721	508	51.681	58.666	6.98463	0.00143067	-0.00444387	1.60746	1	1
Solyc01g010497	SL3.0ch01	5370286	5372286	-	754	162	972	135	82.314	87.805	5.49047	0.00280109	0	-3.91086	1	1
Solyc01g010506	SL3.0ch01	5441999	5443999	+	756	348	810	268	68.478	75.139	6.66089	0.00269553	0	-3.91086	1	1
Solyc01g010520	SL3.0ch01	5479930	5481930	+	791	665	739	508	54.327	59.262	4.93531	0.0274946	-0.600301	2.07913	0.216104	1
Solyc01g010550	SL3.0ch01	5502932	5504932	-	1373	189	1229	107	87.9	91.991	4.09089	0.00138522	0	-3.91086	1	1
Solyc01g010660	SL3.0ch01	5615545	5617545	+	1199	898	1244	658	57.177	65.405	8.22792	1.18224e-06	0.0754237	5.97609	0.879009	1
Solyc01g010840	SL3.0ch01	6220360	6222360	+	1653	341	1376	190	82.899	87.867	4.96848	0.000235082	0	-3.91086	1	1
Solyc01g010950	SL3.0ch01	6457538	6459538	-	433	336	493	250	56.307	66.353	10.0457	0.000441323	0.103547	4.75747	0.717742	1
Solyc01g010960	SL3.0ch01	6544663	6546663	+	653	131	697	97	83.291	87.783	4.49256	0.0315875	-0.701167	-3.6613	1	1
Solyc01g010970	SL3.0ch01	6565739	6567739	+	561	568	543	430	49.69	55.807	6.11679	0.0173797	1.29791	-0.189427	0.164259	1
Solyc01g011000	SL3.0ch01	6805801	6807801	-	635	304	620	229	67.625	73.027	5.40196	0.0333376	0.259625	8.05796	0.380819	1
Solyc01g011110	SL3.0ch01	7607035	7609035	+	113	416	126	328	21.361	27.753	6.39225	0.0482383	0	-3.91086	1	1
Solyc01g011220	SL3.0ch01	8086667	8088667	-	71	603	111	366	10.534	23.27	12.7363	1.51539e-07	0.138984	-1.4162	0.930252	1
Solyc01g011225	SL3.0ch01	8087887	8089887	-	15	597	77	264	2.451	22.581	20.1297	1.63825e-21	0.752913	-2.39074	0.583863	1
Solyc01g011260	SL3.0ch01	8174971	8176971	-	133	37	135	18	78.235	88.235	10	0.0430653	0	-3.91086	1	1
Solyc01g011310	SL3.0ch01	8517272	8519272	-	521	183	717	184	74.006	79.578	5.57256	0.02695	0	-3.86883	1	1
Solyc01g011335	SL3.0ch01	8618732	8620732	-	1249	151	1230	108	89.214	91.928	2.71397	0.0385783	0	-3.91086	1	1
Solyc01g011337	SL3.0ch01	8620776	8622776	-	1114	270	1022	155	80.491	86.831	6.3396	0.000135561	0	-3.91086	1	1
Solyc01g011370	SL3.0ch01	8689408	8691408	+	903	236	848	160	79.28	84.127	4.84691	0.0140002	0	-3.91086	1	1
Solyc01g011390	SL3.0ch01	8706149	8708149	-	415	298	536	204	58.205	72.432	14.2277	1.76095e-07	-4.19186	-3.50037	0.199346	1
Solyc01g011393	SL3.0ch01	8731034	8733034	-	534	129	469	73	80.543	86.531	5.98838	0.0192967	0	-3.91086	1	1
Solyc01g011397	SL3.0ch01	8853338	8855338	+	646	225	649	149	74.168	81.328	7.1607	0.00234583	0	-3.91086	1	1
Solyc01g011497	SL3.0ch01	9372169	9374169	-	433	343	530	306	55.799	63.397	7.59816	0.00708475	0	-3.69581	1	1
Solyc01g012570	SL3.0ch01	9632062	9634062	-	318	106	294	40	75	88.024	13.024	4.07596e-05	0	-3.91086	1	1
Solyc01g012630	SL3.0ch01	9744890	9746890	-	209	73	306	59	74.113	83.836	9.72214	0.010368	0	-3.91086	1	1
Solyc01g012670	SL3.0ch01	9780148	9782148	-	310	63	278	33	83.11	89.389	6.27915	0.0470699	0	-3.91086	1	1
Solyc01g012730	SL3.0ch01	9918301	9920301	-	143	65	84	15	68.75	84.848	16.0985	0.0109382	0	-3.91086	1	1
Solyc01g013770	SL3.0ch01	10088680	10090680	-	1641	653	1154	336	71.534	77.45	5.91523	0.00031543	0	-3.91086	1	1
Solyc01g013780	SL3.0ch01	10089410	10091410	-	1572	666	1116	321	70.241	77.662	7.42051	6.88857e-06	0	-3.91086	1	1
Solyc01g013790	SL3.0ch01	10088656	10090656	+	1658	656	1168	339	71.651	77.505	5.85416	0.000335768	0	-3.91086	1	1
Solyc01g013870	SL3.0ch01	10223696	10225696	-	529	230	537	170	69.697	75.955	6.25777	0.0231237	0	-3.91086	1	1
Solyc01g013915	SL3.0ch01	10356480	10358480	+	304	118	425	103	72.038	80.492	8.45451	0.00888844	-0.0648369	-3.22081	1	1
Solyc01g013950	SL3.0ch01	10437545	10439545	-	273	70	185	27	79.592	87.264	7.67231	0.0494189	0	-3.91086	1	1
Solyc01g013995	SL3.0ch01	10737461	10739461	+	530	184	692	156	74.23	81.604	7.37408	0.00208721	0	-3.87203	1	1
Solyc01g014050	SL3.0ch01	11040787	11042787	-	568	131	751	117	81.259	86.521	5.2618	0.0161956	0	-3.91086	1	1
Solyc01g014090	SL3.0ch01	11213848	11215848	+	432	162	302	73	72.727	80.533	7.80606	0.0170684	0	-3.91086	1	1
Solyc01g014130	SL3.0ch01	11609250	11611250	+	620	460	599	345	57.407	63.453	6.04598	0.0186222	0	-3.86883	1	1
Solyc01g014147	SL3.0ch01	11677273	11679273	+	580	140	639	85	80.556	88.26	7.70411	0.000377549	0	-3.91086	1	1
Solyc01g014180	SL3.0ch01	11697872	11699872	-	440	767	504	643	36.454	43.941	7.4867	0.00111192	0.319609	9.18962	0.279766	1
Solyc01g014225	SL3.0ch01	11797367	11799367	+	944	193	1075	116	83.026	90.26	7.23478	2.81767e-06	1.9444	-3.87079	1	1
Solyc01g014300	SL3.0ch01	11950544	11952544	-	627	649	544	406	49.138	57.263	8.12523	0.000851207	0	-3.91086	1	1
Solyc01g014397	SL3.0ch01	13017904	13019904	-	325	103	174	26	75.935	87	11.0654	0.00538259	0	-3.91086	1	1
Solyc01g014450	SL3.0ch01	13581449	13583449	-	231	104	166	38	68.955	81.373	12.4173	0.00637368	0	-3.91086	1	1
Solyc01g014510	SL3.0ch01	13947910	13949910	+	1061	294	982	204	78.303	82.799	4.49674	0.0154687	0	-3.91086	1	1
Solyc01g014520	SL3.0ch01	13958600	13960600	+	1027	162	1012	99	86.375	91.089	4.714	0.00177962	0	-3.57627	1	1
Solyc01g150007	SL3.0ch01	14259212	14261212	+	5261	508	4070	311	91.194	92.901	1.70685	0.00649756	0	-3.91086	1	1
Solyc01g014540	SL3.0ch01	14259949	14261949	+	5470	536	4180	312	91.076	93.054	1.97873	0.00113688	0	-3.91086	1	1
Solyc01g014560	SL3.0ch01	14271435	14273435	-	1256	798	1073	566	61.149	65.467	4.31777	0.0212659	-0.220446	3.26495	0.850273	1
Solyc01g014623	SL3.0ch01	14378083	14380083	+	110	40	217	40	73.333	84.436	11.1025	0.0257152	0	-3.91086	1	1
Solyc01g014660	SL3.0ch01	14416763	14418763	-	1049	249	900	140	80.817	86.538	5.72182	0.00114432	0	-3.74195	1	1
Solyc01g014740	SL3.0ch01	14727641	14729641	+	2444	404	2190	251	85.815	89.717	3.90272	0.000133398	-0.636492	-2.81024	0.739682	1
Solyc01g014940	SL3.0ch01	15955704	15957704	-	16	124	66	125	11.429	34.555	23.1264	1.22327e-05	0	-3.91086	1	1
Solyc01g015000	SL3.0ch01	16517350	16519350	+	1190	190	942	88	86.232	91.456	5.22443	0.000379206	-1.39385	-2.37536	0.26144	1
Solyc01g015030	SL3.0ch01	16601492	16603492	-	547	1004	514	788	35.268	39.478	4.21016	0.0497582	0	-3.91086	1	1
Solyc01g015050	SL3.0ch01	16660683	16662683	+	902	245	787	134	78.64	85.451	6.81067	0.000455478	0	-3.91086	1	1
Solyc01g015070	SL3.0ch01	16667523	16669523	+	431	180	387	103	70.54	78.98	8.43949	0.00545697	0	-3.91086	1	1
Solyc01g015180	SL3.0ch01	17385760	17387760	-	489	129	450	75	79.126	85.714	6.58807	0.0130966	0	-3.91086	1	1
Solyc01g015290	SL3.0ch01	18336641	18338641	+	516	336	828	188	60.563	81.496	20.9327	7.53631e-22	0	-3.91086	1	1
Solyc01g016300	SL3.0ch01	18622146	18624146	-	292	88	455	84	76.842	84.416	7.57348	0.0142715	0	-3.91086	1	1
Solyc01g016460	SL3.0ch01	19931727	19933727	-	6	312	1140	244	1.887	82.37	80.4831	1.6723e-172	-5.21158	-0.617724	9.49905e-08	5.22711e-05
Solyc01g016475	SL3.0ch01	20099939	20101939	+	1647	212	1484	130	88.596	91.945	3.34946	0.00380754	0	-3.91086	1	1
Solyc01g016540	SL3.0ch01	20365492	20367492	+	373	567	438	282	39.681	60.833	21.1525	4.74966e-16	0	-3.91086	1	1
Solyc01g016660	SL3.0ch01	20895446	20897446	+	526	111	555	80	82.575	87.402	4.82701	0.0436367	0	-3.91086	1	1
Solyc01g016670	SL3.0ch01	20932319	20934319	-	491	579	412	329	45.888	55.601	9.71269	0.000306003	0	-3.91086	1	1
Solyc01g016770	SL3.0ch01	21976695	21978695	+	1689	384	1941	212	81.476	90.153	8.67715	1.86585e-14	1.94439	-3.87079	1	1
Solyc01g016780	SL3.0ch01	21976998	21978998	+	1409	264	1733	126	84.22	93.222	9.0022	4.94948e-16	0	-3.91086	1	1
Solyc01g016800	SL3.0ch01	22153123	22155123	-	684	114	627	53	85.714	92.206	6.4916	0.000561201	-3.03485	-3.80323	0.522497	1
Solyc01g016900	SL3.0ch01	22700036	22702036	+	760	174	767	130	81.37	85.507	4.1368	0.0466653	0	-3.91086	1	1
Solyc01g016910	SL3.0ch01	22801939	22803939	+	604	179	547	109	77.139	83.384	6.24494	0.0117011	0	-3.91086	1	1
Solyc01g016960	SL3.0ch01	23096455	23098455	-	555	192	720	189	74.297	79.208	4.91073	0.0447667	0	-3.91086	1	1
Solyc01g017020	SL3.0ch01	23424085	23426085	-	208	79	206	45	72.474	82.072	9.59785	0.027396	0	-3.91086	1	1
Solyc01g017060	SL3.0ch01	23788565	23790565	-	450	3751	363	2167	10.712	14.348	3.63609	9.22444e-05	0	-3.91086	1	1
Solyc01g017070	SL3.0ch01	23789286	23791286	-	659	5951	452	3456	9.97	11.566	1.59628	0.0280079	0	-3.91086	1	1
Solyc01g017083	SL3.0ch01	23789404	23791404	+	671	5917	463	3422	10.185	11.918	1.73245	0.0184911	0	-3.91086	1	1
Solyc01g017100	SL3.0ch01	23793706	23795706	+	1307	15040	1248	11273	7.995	9.967	1.9719	8.97494e-08	-4.61555	-3.58185	0.236379	1
Solyc01g017110	SL3.0ch01	23794404	23796404	+	1043	13212	1087	9873	7.317	9.918	2.60115	6.61301e-12	0	-3.63278	1	1
Solyc01g017120	SL3.0ch01	23797034	23799034	+	544	878	691	569	38.256	54.841	16.5853	3.25609e-16	0	-3.91086	1	1
Solyc01g017130	SL3.0ch01	23797396	23799396	+	400	762	569	486	34.423	53.934	19.5102	1.10008e-18	0	-3.87249	1	1
Solyc01g017140	SL3.0ch01	23797946	23799946	+	840	14574	1121	8529	5.45	11.617	6.16699	2.22114e-65	1.80403	-3.6634	1	1
Solyc01g017150	SL3.0ch01	23800697	23802697	+	449	831	410	380	35.078	51.899	16.8206	1.77807e-12	0	-3.91086	1	1
Solyc01g017160	SL3.0ch01	23803934	23805934	-	1000	3870	1008	2345	20.534	30.063	9.52875	5.23387e-21	0	-3.91086	1	1
Solyc01g017190	SL3.0ch01	23806285	23808285	-	642	792	631	529	44.77	54.397	9.62668	1.10558e-05	0	-3.91086	1	1
Solyc01g017183	SL3.0ch01	23806630	23808630	-	572	2292	560	1537	19.972	26.705	6.73275	3.69261e-07	-0.929644	-1.98926	0.494486	1
Solyc01g017185	SL3.0ch01	23807137	23809137	-	578	5759	506	3923	9.121	11.425	2.30367	0.000603271	0	-3.91086	1	1
Solyc01g017187	SL3.0ch01	23807619	23809619	-	674	6141	590	4244	9.89	12.205	2.31526	0.000492287	0	-3.69406	1	1
Solyc01g017210	SL3.0ch01	23809922	23811922	-	1034	7606	984	4911	11.968	16.692	4.72452	3.31495e-14	0	-3.8312	1	1
Solyc01g017220	SL3.0ch01	23812705	23814705	-	845	8142	749	6048	9.402	11.02	1.6171	0.00385353	-1.21908	-0.0215383	0.0523551	1
Solyc01g017230	SL3.0ch01	23810933	23812933	+	922	21607	966	13993	4.093	6.458	2.36515	2.13467e-22	0	-3.91086	1	1
Solyc01g017235	SL3.0ch01	23814152	23816152	-	723	1614	647	1194	30.937	35.144	4.20684	0.0136795	0	-3.91086	1	1
Solyc01g017240	SL3.0ch01	23814578	23816578	-	504	489	506	382	50.755	56.982	6.22669	0.020772	0	-3.91086	1	1
Solyc01g017245	SL3.0ch01	23814842	23816842	-	448	462	453	365	49.231	55.379	6.1482	0.0315411	0	-3.91086	1	1
Solyc01g017250	SL3.0ch01	23815856	23817856	-	487	914	644	606	34.761	51.52	16.7591	1.23133e-16	0	-3.91086	1	1
Solyc01g017260	SL3.0ch01	23815770	23817770	+	497	914	680	616	35.223	52.469	17.2459	7.87012e-18	-1.81381	-3.83664	1	1
Solyc01g017270	SL3.0ch01	23819470	23821470	-	620	765	478	415	44.765	53.527	8.76209	0.000285631	0	-3.91086	1	1
Solyc01g017310	SL3.0ch01	23853119	23855119	+	555	1953	709	1240	22.129	36.378	14.2484	1.22886e-23	0	-3.91086	1	1
Solyc01g017320	SL3.0ch01	23853532	23855532	+	657	2043	855	1297	24.333	39.73	15.3971	1.73596e-28	1.90137	-3.87171	1	1
Solyc01g017333	SL3.0ch01	23854293	23856293	+	612	3601	736	2212	14.526	24.966	10.4396	2.30639e-26	-1.93053	-3.83347	1	1
Solyc01g017337	SL3.0ch01	23857137	23859137	-	659	13065	642	9135	4.802	6.566	1.76462	1.16279e-07	2.53528	-3.63453	0.65113	1
Solyc01g017360	SL3.0ch01	23857490	23859490	+	713	12078	742	8458	5.574	8.065	2.49099	9.07523e-12	0	-3.91086	1	1
Solyc01g017370	SL3.0ch01	23858039	23860039	+	879	17760	980	12700	4.716	7.164	2.44782	9.15004e-19	-1.93645	-3.2165	1	1
Solyc01g017380	SL3.0ch01	23859648	23861648	+	649	7256	676	5321	8.21	11.272	3.06231	2.43299e-08	0	-3.79469	1	1
Solyc01g017390	SL3.0ch01	23860018	23862018	+	543	3560	623	2308	13.234	21.256	8.02133	3.78444e-17	0	-3.86962	1	1
Solyc01g017400	SL3.0ch01	23861079	23863079	+	542	2139	701	1293	20.216	35.155	14.9391	4.87124e-28	0.287018	0.22204	0.627214	1
Solyc01g017410	SL3.0ch01	23865798	23867798	-	697	7142	774	4874	8.891	13.704	4.81253	7.7355e-17	0	-3.91086	1	1
Solyc01g017420	SL3.0ch01	23864352	23866352	+	1155	2807	1276	1874	29.152	40.508	11.356	8.2106e-22	0	-3.661	1	1
Solyc01g017460	SL3.0ch01	23864352	23866352	+	1155	2807	1276	1874	29.152	40.508	11.356	8.2106e-22	-3.6627	-3.62037	0.39338	1
Solyc01g017430	SL3.0ch01	23866598	23868598	+	791	7813	889	5075	9.193	14.906	5.7127	4.8117e-24	0	-3.91086	1	1
Solyc01g017440	SL3.0ch01	23870256	23872256	-	599	5198	775	3184	10.333	19.576	9.24272	3.57467e-35	-2.25997	-2.85883	0.480046	1
Solyc01g017450	SL3.0ch01	23870776	23872776	-	527	4619	680	2926	10.241	18.857	8.6165	4.14709e-28	0	-3.72901	1	1
Solyc01g017470	SL3.0ch01	23869350	23871350	+	1098	8447	1051	5509	11.503	16.021	4.51794	7.04213e-15	1.90257	-3.61296	1	1
Solyc01g017480	SL3.0ch01	23872592	23874592	-	810	1331	530	706	37.833	42.88	5.04747	0.012715	0	-3.91086	1	1
Solyc01g017490	SL3.0ch01	23874323	23876323	-	1203	358	745	112	77.066	86.931	9.86517	3.51022e-08	1.89891	-3.78842	1	1
Solyc01g017485	SL3.0ch01	23880162	23882162	-	748	774	614	521	49.146	54.097	4.95106	0.0313804	0	-3.91086	1	1
Solyc01g017500	SL3.0ch01	23875211	23877211	+	1100	436	667	130	71.615	83.689	12.0742	1.18024e-09	0	-3.79401	1	1
Solyc01g017510	SL3.0ch01	23878625	23880625	+	895	1760	972	949	33.71	50.599	16.8887	1.81131e-28	0	-3.87049	1	1
Solyc01g017563	SL3.0ch01	24034632	24036632	-	816	177	899	141	82.175	86.442	4.26708	0.0239693	0	-3.91086	1	1
Solyc01g017567	SL3.0ch01	24046204	24048204	+	473	752	462	546	38.612	45.833	7.22109	0.00287518	0	-3.50434	1	1
Solyc01g017620	SL3.0ch01	24362071	24364071	-	620	364	735	297	63.008	71.221	8.2128	0.000563756	0	-3.91086	1	1
Solyc01g017680	SL3.0ch01	24701309	24703309	-	498	211	766	182	70.24	80.802	10.5619	6.66241e-06	0	-3.91086	1	1
Solyc01g017730	SL3.0ch01	24846709	24848709	-	267	241	329	116	52.559	73.933	21.3735	2.21825e-10	0.0181972	-3.09097	1	1
Solyc01g017820	SL3.0ch01	25465407	25467407	+	226	140	320	114	61.749	73.733	11.9841	0.00162162	0	-3.91086	1	1
Solyc01g017870	SL3.0ch01	25742308	25744308	-	363	157	458	139	69.808	76.717	6.90923	0.0266142	-0.372155	-2.76573	0.904499	1
Solyc01g018020	SL3.0ch01	26749511	26751511	+	1309	293	1054	153	81.71	87.324	5.61358	0.000353445	-0.649098	-1.8584	0.690448	1
Solyc01g018025	SL3.0ch01	26774919	26776919	-	617	85	492	40	87.892	92.481	4.58947	0.0267807	0	-3.91086	1	1
Solyc01g019100	SL3.0ch01	27469556	27471556	-	583	200	461	86	74.457	84.278	9.82066	0.000129067	0	-3.91086	1	1
Solyc01g020200	SL3.0ch01	27787943	27789943	+	462	287	491	200	61.682	71.056	9.3742	0.000977172	0	-3.65206	1	1
Solyc01g020220	SL3.0ch01	27847588	27849588	+	792	232	878	122	77.344	87.8	10.4563	1.09725e-08	0.636891	-1.86979	0.522456	1
Solyc01g020230	SL3.0ch01	27847886	27849886	+	798	516	882	376	60.731	70.111	9.38069	6.43919e-06	0.916153	-0.974255	0.425693	1
Solyc01g020280	SL3.0ch01	28539655	28541655	+	1782	434	1589	314	80.415	83.5	3.08457	0.0284666	0	-3.91086	1	1
Solyc01g020300	SL3.0ch01	28914610	28916610	+	66	532	108	549	11.037	16.438	5.40157	0.019911	0	-3.87283	1	1
Solyc01g020374	SL3.0ch01	29463265	29465265	-	447	186	545	106	70.616	83.717	13.1012	2.72319e-07	0	-3.91086	1	1
Solyc01g020450	SL3.0ch01	30831429	30833429	-	395	346	371	240	53.306	60.72	7.41379	0.0199992	0	-3.91086	1	1
Solyc01g020500	SL3.0ch01	30954014	30956014	+	861	119	799	49	87.857	94.222	6.36456	1.88573e-05	0.0936205	0.963626	0.850607	1
Solyc01g020510	SL3.0ch01	31023653	31025653	-	947	796	893	575	54.332	60.831	6.49945	0.00115602	0	-3.91086	1	1
Solyc01g020570	SL3.0ch01	31665826	31667826	-	356	122	316	61	74.477	83.82	9.34264	0.00417784	1.79658	-3.83726	1	1
Solyc01g033990	SL3.0ch01	35316300	35318300	+	909	355	907	272	71.915	76.93	5.01504	0.0147048	0	-3.91086	1	1
Solyc01g034155	SL3.0ch01	36292983	36294983	-	116	726	159	657	13.777	19.485	5.70857	0.00694543	0.388213	0.968554	0.539544	1
Solyc01g038235	SL3.0ch01	39002824	39004824	+	218	39	84	4	84.825	95.455	10.6296	0.0231516	0	-3.91086	1	1
Solyc01g028980	SL3.0ch01	39013065	39015065	+	275	164	444	148	62.642	75	12.3576	0.000147833	0	-3.91086	1	1
Solyc01g028983	SL3.0ch01	39355924	39357924	-	275	234	296	172	54.028	63.248	9.22036	0.0134513	0	-3.91086	1	1
Solyc01g028960	SL3.0ch01	39355924	39357924	-	275	234	296	172	54.028	63.248	9.22036	0.0134513	0	-3.91086	1	1
Solyc01g028987	SL3.0ch01	39618537	39620537	+	564	201	586	111	73.725	84.075	10.3491	1.38842e-05	0	-3.91086	1	1
Solyc01g028805	SL3.0ch01	42409185	42411185	+	469	192	469	76	70.953	86.055	15.1019	5.04121e-09	0.474638	3.22533	0.436062	1
Solyc01g044360	SL3.0ch01	43194404	43196404	+	1203	505	1162	405	70.433	74.154	3.72118	0.0450224	0.295385	8.00545	0.301726	1
Solyc01g044420	SL3.0ch01	43828162	43830162	+	317	264	354	125	54.561	73.904	19.3429	1.63742e-09	1.29334	-1.85885	0.188288	1
Solyc01g044565	SL3.0ch01	44585999	44587999	+	230	102	363	83	69.277	81.39	12.113	0.000670131	-2.13727	-3.65733	0.454059	1
Solyc01g047590	SL3.0ch01	44888424	44890424	-	2765	560	2619	451	83.158	85.309	2.15155	0.0460031	0.777306	-3.19005	0.849946	1
Solyc01g048590	SL3.0ch01	44910788	44912788	+	468	161	381	77	74.404	83.188	8.78396	0.00271601	0.285508	0.31431	0.789565	1
Solyc01g050020	SL3.0ch01	47952218	47954218	+	85	329	157	191	20.531	45.115	24.5835	1.12217e-11	-3.98213	-3.70139	0.236684	1
Solyc01g056240	SL3.0ch01	52610547	52612547	+	202	650	281	429	23.709	39.577	15.8685	3.65623e-10	0	-3.91086	1	1
Solyc01g056280	SL3.0ch01	52759274	52761274	-	298	701	315	554	29.83	36.249	6.41873	0.0116592	0	-3.91086	1	1
Solyc01g056330	SL3.0ch01	53384799	53386799	-	194	322	277	249	37.597	52.662	15.0647	1.09857e-05	0	-3.42157	1	1
Solyc01g056340	SL3.0ch01	53583870	53585870	+	495	85	584	63	85.345	90.263	4.91792	0.0237578	0.0207653	3.81561	0.950929	1
Solyc01g056360	SL3.0ch01	53726213	53728213	+	300	120	343	94	71.429	78.49	7.06113	0.0428874	0	-3.91086	1	1
Solyc01g056370	SL3.0ch01	53873236	53875236	-	654	256	698	167	71.868	80.694	8.82551	9.87264e-05	0	-3.91086	1	1
Solyc01g056375	SL3.0ch01	53873195	53875195	-	634	239	663	158	72.623	80.755	8.13204	0.000536409	0	-3.91086	1	1
Solyc01g056450	SL3.0ch01	54162991	54164991	+	285	118	359	72	70.72	83.295	12.5751	0.000118364	0	-3.91086	1	1
Solyc01g056480	SL3.0ch01	54395531	54397531	-	1385	283	1221	195	83.034	86.229	3.19524	0.0401792	0.693323	0.564825	0.279844	1
Solyc01g056640	SL3.0ch01	55134034	55136034	+	1174	460	1189	246	71.848	82.857	11.0089	1.11797e-11	0	-3.91086	1	1
Solyc01g056720	SL3.0ch01	56283964	56285964	-	867	611	799	395	58.66	66.918	8.25757	8.92977e-05	0.0738072	4.2251	0.819841	1
Solyc01g056870	SL3.0ch01	57345894	57347894	-	317	275	287	126	53.547	69.492	15.9442	4.50272e-06	0	-3.91086	1	1
Solyc01g056875	SL3.0ch01	57379524	57381524	-	955	241	798	134	79.849	85.622	5.77282	0.00254737	-3.99108	-3.70088	0.186714	1
Solyc01g056880	SL3.0ch01	57370151	57372151	+	958	346	985	141	73.466	87.478	14.0115	1.25063e-16	0	-3.91086	1	1
Solyc01g056910	SL3.0ch01	57395771	57397771	+	431	108	657	103	79.963	86.447	6.48447	0.00789038	1.81767	-3.55801	1	1
Solyc01g056930	SL3.0ch01	57484268	57486268	+	685	256	791	232	72.795	77.322	4.5267	0.0492611	0	-3.91086	1	1
Solyc01g057010	SL3.0ch01	57923459	57925459	+	420	1091	628	1095	27.796	36.448	8.65189	1.83886e-06	0	-3.91086	1	1
Solyc01g057080	SL3.0ch01	58284435	58286435	-	629	891	704	836	41.382	45.714	4.33271	0.0394911	0.0074754	-2.43168	1	1
Solyc01g057100	SL3.0ch01	58370192	58372192	-	677	230	627	156	74.642	80.077	5.43495	0.0245426	0	-3.91086	1	1
Solyc01g057260	SL3.0ch01	60236776	60238776	+	391	629	421	359	38.333	53.974	15.641	8.29561e-10	0.800647	-0.431702	0.422885	1
Solyc01g057300	SL3.0ch01	60437667	60439667	-	481	613	533	550	43.967	49.215	5.24805	0.036053	0.319914	-2.69959	0.8871	1
Solyc01g057360	SL3.0ch01	60763174	60765174	-	273	620	329	491	30.571	40.122	9.55084	0.000257044	0	-3.91086	1	1
Solyc01g057355	SL3.0ch01	60763174	60765174	-	273	620	329	491	30.571	40.122	9.55084	0.000257044	0	-3.91086	1	1
Solyc01g057370	SL3.0ch01	60767831	60769831	-	776	396	739	286	66.212	72.098	5.88596	0.0104151	0	-3.91086	1	1
Solyc01g057390	SL3.0ch01	60813726	60815726	-	1248	404	1243	176	75.545	87.597	12.0521	2.91292e-16	0	-3.91086	1	1
Solyc01g057410	SL3.0ch01	60857504	60859504	-	128	719	186	569	15.112	24.636	9.5236	1.85679e-05	0	-3.91086	1	1
Solyc01g057440	SL3.0ch01	60917137	60919137	-	1240	321	1147	238	79.436	82.816	3.37963	0.0484622	0.503926	1.34169	0.386438	1
Solyc01g057465	SL3.0ch01	61007314	61009314	+	625	184	602	131	77.256	82.128	4.87237	0.045298	1.78818	-3.87428	1	1
Solyc01g057477	SL3.0ch01	61044362	61046362	+	1047	252	884	136	80.6	86.667	6.0662	0.000605611	0.786692	1.17835	0.115474	1
Solyc01g057510	SL3.0ch01	61227445	61229445	+	1042	309	942	213	77.128	81.558	4.43039	0.0194844	0	-3.87049	1	1
Solyc01g057560	SL3.0ch01	61689831	61691831	-	73	51	106	18	58.871	85.484	26.6129	3.53864e-05	0	-3.82946	1	1
Solyc01g057600	SL3.0ch01	62807521	62809521	-	438	1010	437	728	30.249	37.511	7.26211	0.000594406	0.710528	-2.88144	0.628854	1
Solyc01g057640	SL3.0ch01	63038158	63040158	+	729	535	848	245	57.674	77.585	19.9106	3.40638e-23	0	-3.91086	1	1
Solyc01g057660	SL3.0ch01	63387451	63389451	+	298	52	381	39	85.143	90.714	5.57143	0.0441075	0	-3.91086	1	1
Solyc01g057670	SL3.0ch01	63387834	63389834	+	432	72	476	49	85.714	90.667	4.95238	0.0380284	0	-3.91086	1	1
Solyc01g057700	SL3.0ch01	63475636	63477636	-	1147	199	1105	131	85.215	89.401	4.18584	0.0055102	0	-3.75208	1	1
Solyc01g057740	SL3.0ch01	63547059	63549059	-	674	792	601	497	45.975	54.736	8.76044	9.87559e-05	-1.93934	-3.87098	1	1
Solyc01g057900	SL3.0ch01	64174320	64176320	-	747	189	594	109	79.808	84.495	4.68733	0.0403661	0.137138	5.91088	0.622168	1
Solyc01g058050	SL3.0ch01	64988291	64990291	-	405	124	517	107	76.56	82.853	6.29302	0.0263053	0	-3.91086	1	1
Solyc01g058100	SL3.0ch01	65142388	65144388	-	261	1058	319	922	19.788	25.705	5.91736	0.00184984	0.318272	-3.08316	0.9296	1
Solyc01g058210	SL3.0ch01	65559641	65561641	-	406	133	404	87	75.325	82.281	6.95638	0.0217448	-7.1456	-1.41099	1.30757e-06	0.000543829
Solyc01g058220	SL3.0ch01	65597632	65599632	-	138	192	229	154	41.818	59.791	17.9729	1.86268e-05	0.615882	-3.42015	1	1
Solyc01g058230	SL3.0ch01	65702559	65704559	-	500	586	529	342	46.041	60.735	14.6943	1.86551e-09	4.30201	-0.553606	0.0513597	1
Solyc01g058240	SL3.0ch01	65702714	65704714	+	502	619	529	367	44.781	59.04	14.2587	3.53778e-09	1.88935	-2.00696	1	1
Solyc01g058327	SL3.0ch01	66260684	66262684	+	1237	274	975	161	81.866	85.827	3.96115	0.0199508	0	-3.91086	1	1
Solyc01g058410	SL3.0ch01	66431468	66433468	-	497	134	491	73	78.764	87.057	8.29287	0.000894739	2.70462	-3.83362	0.671725	1
Solyc01g058420	SL3.0ch01	66429522	66431522	+	772	490	669	277	61.173	70.719	9.54607	2.76137e-05	0	-3.91086	1	1
Solyc01g058460	SL3.0ch01	66622794	66624794	+	327	368	305	238	47.05	56.169	9.11907	0.00606881	0	-3.91086	1	1
Solyc01g058550	SL3.0ch01	66945853	66947853	-	813	256	617	131	76.052	82.487	6.43425	0.00439419	0	-3.91086	1	1
Solyc01g058650	SL3.0ch01	67338542	67340542	-	1551	259	1226	124	85.691	90.815	5.12421	9.36762e-05	1.90137	-3.87171	1	1
Solyc01g058680	SL3.0ch01	67566799	67568799	-	687	148	593	71	82.275	89.307	7.03178	0.000687309	0	-3.91086	1	1
Solyc01g058730	SL3.0ch01	67948782	67950782	-	770	717	730	431	51.782	62.877	11.0947	1.73156e-07	0.0929807	6.24769	0.710952	1
Solyc01g058733	SL3.0ch01	67938864	67940864	+	639	439	687	358	59.276	65.742	6.46519	0.00813342	2.63009	-3.03985	0.58513	1
Solyc01g059830	SL3.0ch01	68585000	68587000	-	989	163	1031	79	85.851	92.883	7.03219	7.56431e-07	0.456892	5.94816	0.0876956	1
Solyc01g059888	SL3.0ch01	69101490	69103490	+	170	158	217	103	51.829	67.813	15.9832	0.000269305	0	-3.91086	1	1
Solyc01g059950	SL3.0ch01	69287391	69289391	+	323	627	272	344	34	44.156	10.1558	0.000383751	0.563884	-0.349499	0.42977	1
Solyc01g059960	SL3.0ch01	69298312	69300312	+	1092	221	996	124	83.168	88.929	5.76025	0.000340087	0	-3.87249	1	1
Solyc01g059990	SL3.0ch01	69328468	69330468	+	1347	346	1342	249	79.563	84.349	4.78656	0.00188992	4.2344	-2.19551	0.24949	1
Solyc01g060030	SL3.0ch01	69376517	69378517	+	1687	289	1543	206	85.374	88.222	2.84735	0.0309974	0.274584	6.60143	0.313545	1
Solyc01g060040	SL3.0ch01	69390421	69392421	-	8	409	23	363	1.918	5.959	4.04008	0.0105711	0.274122	4.24565	0.388255	1
Solyc01g060130	SL3.0ch01	69610434	69612434	+	906	251	930	184	78.306	83.483	5.17698	0.00713201	0.126545	4.78419	0.668529	1
Solyc01g060200	SL3.0ch01	69724450	69726450	-	412	390	412	235	51.372	63.679	12.3069	2.29698e-05	5.39535	-3.09027	0.0184366	0.651986
Solyc01g060205	SL3.0ch01	69736096	69738096	-	12	409	18	177	2.85	9.231	6.38041	0.00437007	-1.3682	0.64954	0.0161932	0.613497
Solyc01g060245	SL3.0ch01	69902900	69904900	+	1395	343	1146	170	80.265	87.082	6.81739	5.82856e-06	0.314433	1.70084	0.631393	1
Solyc01g060250	SL3.0ch01	69902922	69904922	+	1395	343	1146	170	80.265	87.082	6.81739	5.82856e-06	-0.195523	-1.24909	0.82787	1
Solyc01g060284	SL3.0ch01	69996146	69998146	+	682	165	644	108	80.519	85.638	5.11882	0.0217745	0	-3.91086	1	1
Solyc01g060300	SL3.0ch01	69996146	69998146	+	682	165	644	108	80.519	85.638	5.11882	0.0217745	0	-3.91086	1	1
Solyc01g060286	SL3.0ch01	70022040	70024040	+	595	109	595	73	84.517	89.072	4.55481	0.0344352	0	-3.91086	1	1
Solyc01g060288	SL3.0ch01	70030676	70032676	+	467	222	428	124	67.779	77.536	9.75684	0.000889969	0	-3.91086	1	1
Solyc01g060355	SL3.0ch01	70522630	70524630	-	29	28	53	17	50.877	75.714	24.8371	0.0154924	0	-3.91086	1	1
Solyc01g060430	SL3.0ch01	70952367	70954367	-	616	159	677	105	79.484	86.573	7.08902	0.00104298	0	-3.91086	1	1
Solyc01g060460	SL3.0ch01	70968120	70970120	-	261	1126	301	847	18.818	26.22	7.40192	7.3126e-05	0	-3.5747	1	1
Solyc01g060455	SL3.0ch01	70968456	70970456	-	350	942	402	793	27.09	33.64	6.55038	0.00188535	2.70462	-3.83362	0.671672	1
Solyc01g065560	SL3.0ch01	71710547	71712547	-	507	198	828	211	71.915	79.692	7.77712	0.00114717	-0.0546323	3.34828	0.895427	1
Solyc01g065577	SL3.0ch01	71762126	71764126	+	1061	531	1027	374	66.646	73.305	6.65905	0.000462196	1.51948	-3.53375	0.58215	1
Solyc01g065597	SL3.0ch01	71776016	71778016	+	620	108	579	59	85.165	90.752	5.58752	0.0061372	0	-3.83477	1	1
Solyc01g065770	SL3.0ch01	72216005	72218005	-	873	188	629	78	82.281	88.967	6.6866	0.000596189	0	-3.91086	1	1
Solyc01g065780	SL3.0ch01	72217589	72219589	-	1076	239	1005	142	81.825	87.62	5.79478	0.000429371	0	-3.91086	1	1
Solyc01g065790	SL3.0ch01	72215870	72217870	+	814	161	587	66	83.487	89.893	6.40562	0.00127174	0	-3.91086	1	1
Solyc01g065795	SL3.0ch01	72218672	72220672	-	1022	275	632	128	78.797	83.158	4.36067	0.0433048	0	-3.91086	1	1
Solyc01g065800	SL3.0ch01	72216307	72218307	+	893	196	627	74	82.002	89.444	7.44182	0.000102599	0	-3.91086	1	1
Solyc01g065810	SL3.0ch01	72217929	72219929	+	1057	199	938	131	84.156	87.746	3.58951	0.0362267	0	-3.91086	1	1
Solyc01g065910	SL3.0ch01	72385800	72387800	+	615	103	708	79	85.655	89.962	4.30728	0.0298309	0	-3.91086	1	1
Solyc01g065960	SL3.0ch01	72525892	72527892	-	920	120	705	62	88.462	91.917	3.45502	0.0420751	-1.2811	-0.867776	0.287813	1
Solyc01g065980	SL3.0ch01	72602924	72604924	-	221	448	250	348	33.034	41.806	8.77164	0.00525884	-0.395763	9.22691	0.280599	1
Solyc01g065985	SL3.0ch01	72639765	72641765	-	715	306	727	226	70.029	76.285	6.25603	0.00709803	0	-3.91086	1	1
Solyc01g066020	SL3.0ch01	72702973	72704973	-	481	372	585	249	56.389	70.144	13.7547	7.00547e-08	2.06473	-2.55868	0.192953	1
Solyc01g066050	SL3.0ch01	72803199	72805199	-	597	663	610	540	47.381	53.043	5.66253	0.0168724	0.047956	6.58437	0.860271	1
Solyc01g066090	SL3.0ch01	72889620	72891620	-	703	130	661	82	84.394	88.964	4.5699	0.0259936	0	-3.91086	1	1
Solyc01g066110	SL3.0ch01	72927437	72929437	-	619	180	685	81	77.472	89.426	11.9537	3.68434e-09	0	-3.58435	1	1
Solyc01g066120	SL3.0ch01	72967765	72969765	-	650	264	726	175	71.116	80.577	9.46116	2.59143e-05	0	-3.91086	1	1
Solyc01g066203	SL3.0ch01	73221627	73223627	+	978	141	764	77	87.399	90.844	3.44477	0.0404734	0	-3.91086	1	1
Solyc01g066260	SL3.0ch01	73520260	73522260	-	196	281	360	275	41.09	56.693	15.6028	3.61266e-06	-5.38086	-2.10349	0.0182219	0.649471
Solyc01g066380	SL3.0ch01	74055611	74057611	+	357	446	454	272	44.458	62.534	18.0762	4.37754e-11	0	-3.91086	1	1
Solyc01g066500	SL3.0ch01	74304362	74306362	-	776	463	746	335	62.631	69.01	6.37902	0.00531343	-0.553687	-3.33187	0.887758	1
Solyc01g066515	SL3.0ch01	74314919	74316919	-	651	468	614	265	58.177	69.852	11.6752	8.96147e-07	3.66173	-3.70458	0.412105	1
Solyc01g066610	SL3.0ch01	74516552	74518552	-	865	590	822	420	59.45	66.184	6.7334	0.00159475	0.109884	0.833777	0.894951	1
Solyc01g066640	SL3.0ch01	74647198	74649198	+	500	391	543	301	56.117	64.336	8.21977	0.00226594	-0.069928	3.66876	0.883355	1
Solyc01g066720	SL3.0ch01	74689353	74691353	-	499	222	498	120	69.209	80.583	11.3731	2.00109e-05	0.709635	8.34679	0.0242266	0.737477
Solyc01g066750	SL3.0ch01	74733378	74735378	+	495	239	636	52	67.439	92.442	25.0032	2.00902e-31	0	-3.91086	1	1
Solyc01g066770	SL3.0ch01	74767816	74769816	-	963	599	932	316	61.652	74.679	13.0278	5.43829e-12	-0.335356	4.85038	0.275794	1
Solyc01g066840	SL3.0ch01	74867728	74869728	+	551	580	518	432	48.718	54.526	5.80837	0.0256471	0.142882	7.96431	0.693181	1
Solyc01g066880	SL3.0ch01	74937288	74939288	-	28	558	79	506	4.778	13.504	8.72612	1.80827e-06	0.440182	2.52977	0.432296	1
Solyc01g066950	SL3.0ch01	75050337	75052337	-	737	165	741	107	81.707	87.382	5.67476	0.0047174	0.682172	-1.53577	0.479856	1
Solyc01g066957	SL3.0ch01	75110048	75112048	-	143	373	179	327	27.713	35.375	7.66232	0.024114	0	-3.91086	1	1
Solyc01g066980	SL3.0ch01	75110132	75112132	-	143	373	179	327	27.713	35.375	7.66232	0.024114	4.51969	-2.50813	0.15168	1
Solyc01g067090	SL3.0ch01	75249155	75251155	-	181	739	333	591	19.674	36.039	16.365	1.52941e-13	-0.72017	5.57116	0.110856	1
Solyc01g067170	SL3.0ch01	75390315	75392315	+	138	447	152	182	23.59	45.509	21.9192	2.85769e-10	-1.37299	-2.78313	0.435523	1
Solyc01g067250	SL3.0ch01	75446069	75448069	+	4	548	17	432	0.725	3.786	3.06155	0.00487038	0.356928	1.34077	0.473521	1
Solyc01g067275	SL3.0ch01	75473901	75475901	+	549	215	485	140	71.859	77.6	5.74136	0.0389714	0	-3.91086	1	1
Solyc01g067360	SL3.0ch01	75632995	75634995	-	870	404	942	324	68.289	74.408	6.11873	0.00310521	-0.481423	-0.538715	0.568432	1
Solyc01g067390	SL3.0ch01	75677303	75679303	+	220	490	247	389	30.986	38.836	7.85056	0.0097388	0.218992	7.03044	0.443153	1
Solyc01g067510	SL3.0ch01	76050825	76052825	+	1028	801	947	627	56.206	60.165	3.95961	0.0460362	-1.36842	2.06056	0.195077	1
Solyc01g067520	SL3.0ch01	76074665	76076665	+	329	519	593	286	38.797	67.463	28.6659	3.55421e-31	0	-0.764395	1	1
Solyc01g067630	SL3.0ch01	76287228	76289228	-	1163	332	1113	254	77.793	81.419	3.62652	0.0429074	-0.657932	3.91239	0.0683685	1
Solyc09g064400	SL3.0ch01	76555244	76557244	-	1443	290	1896	241	83.266	88.723	5.4565	1.15132e-05	-0.943093	-3.64057	1	1
Solyc01g067770	SL3.0ch01	76553547	76555547	+	459	2169	1582	1339	17.466	54.16	36.6938	1.37759e-180	0	-3.91086	1	1
Solyc01g067840	SL3.0ch01	76619068	76621068	+	273	298	390	264	47.811	59.633	11.8222	0.000229299	-4.7301	-3.57274	0.0892926	1
Solyc01g067905	SL3.0ch01	76739307	76741307	-	771	265	958	226	74.421	80.912	6.49131	0.00135234	0.0668896	5.03321	0.865792	1
Solyc01g067910	SL3.0ch01	76739651	76741651	-	805	177	993	148	81.976	87.029	5.05336	0.00521451	0.717211	2.28159	0.353553	1
Solyc01g067920	SL3.0ch01	76739180	76741180	+	728	358	910	312	67.035	74.468	7.43309	0.000540297	0	-3.91086	1	1
Solyc01g068030	SL3.0ch01	76880555	76882555	-	3	365	13	374	0.815	3.359	2.54396	0.0477362	-0.381707	4.6052	0.234215	1
Solyc01g068050	SL3.0ch01	76887992	76889992	+	1644	391	1416	230	80.786	86.027	5.24049	0.000172052	-0.0347165	3.34262	0.923893	1
Solyc01g068110	SL3.0ch01	77045101	77047101	-	19	208	77	279	8.37	21.629	13.2592	0.000131638	0	-3.91086	1	1
Solyc01g068240	SL3.0ch01	77162156	77164156	+	1303	274	1197	149	82.625	88.93	6.30493	1.35748e-05	-0.0598666	5.23056	0.824784	1
Solyc01g068330	SL3.0ch01	77360605	77362605	-	883	381	862	299	69.858	74.246	4.38874	0.0402373	0.315606	5.07615	0.290346	1
Solyc01g068360	SL3.0ch01	77379828	77381828	+	38	477	51	283	7.379	15.269	7.89082	0.00165421	-1.38505	-0.875058	0.18409	1
Solyc01g068380	SL3.0ch01	77402888	77404888	-	164	1022	184	843	13.828	17.916	4.08827	0.0268721	0.605621	0.278931	0.639897	1
Solyc01g068400	SL3.0ch01	77429671	77431671	+	366	255	380	181	58.937	67.736	8.79899	0.00745603	0.230951	6.28509	0.385788	1
Solyc01g068480	SL3.0ch01	77529201	77531201	+	1426	164	1332	107	89.686	92.564	2.87875	0.0180518	0.14901	6.28933	0.640368	1
Solyc01g068545	SL3.0ch01	77578778	77580778	+	389	443	580	428	46.755	57.54	10.7849	3.53667e-05	0	-3.91086	1	1
Solyc01g068560	SL3.0ch01	77589204	77591204	-	947	976	762	573	49.246	57.079	7.83268	8.55843e-05	-1.49833	1.92278	0.00154436	0.147101
Solyc01g068580	SL3.0ch01	77596655	77598655	+	1492	695	2160	276	68.221	88.67	20.4486	7.46005e-64	-0.00615525	5.06387	0.982664	1
Solyc01g068620	SL3.0ch01	77639039	77641039	+	64	328	87	288	16.327	23.2	6.87347	0.0433048	-0.603258	-1.5761	0.63486	1
Solyc01g068630	SL3.0ch01	77643741	77645741	+	344	740	397	672	31.734	37.138	5.40319	0.023804	-0.168197	-1.89129	0.905498	1
Solyc01g079120	SL3.0ch01	78053864	78055864	-	927	107	956	75	89.652	92.726	3.07367	0.0391046	0	-3.91086	1	1
Solyc01g079170	SL3.0ch01	78121430	78123430	-	93	563	117	484	14.177	19.468	5.29072	0.0324108	2.90177	2.21383	0.000513755	0.0642517
Solyc01g079180	SL3.0ch01	78135368	78137368	+	145	997	173	871	12.697	16.571	3.87386	0.0286961	0	-3.91086	1	1
Solyc01g079260	SL3.0ch01	78213920	78215920	+	205	1282	200	962	13.786	17.212	3.42556	0.0404434	-0.461862	5.79076	0.322385	1
Solyc01g079385	SL3.0ch01	78324649	78326649	+	301	1101	264	567	21.469	31.769	10.2996	1.05987e-06	0.563164	3.06748	0.262309	1
Solyc01g079400	SL3.0ch01	78343710	78345710	-	556	1037	681	985	34.903	40.876	5.97365	0.00212255	-0.669795	2.89569	0.13936	1
Solyc01g079450	SL3.0ch01	78373913	78375913	-	663	358	631	216	64.936	74.498	9.56189	6.93591e-05	-0.150421	6.94205	0.621383	1
Solyc01g079530	SL3.0ch01	78454782	78456782	-	377	670	314	444	36.008	41.425	5.41716	0.0485811	-1.11854	1.29405	0.202634	1
Solyc01g079570	SL3.0ch01	78499014	78501014	+	487	668	370	405	42.165	47.742	5.57743	0.0413741	-0.759088	-2.28626	0.656146	1
Solyc01g079610	SL3.0ch01	78579326	78581326	-	234	355	278	280	39.728	49.821	10.0924	0.00302262	0.348434	4.94118	0.446166	1
Solyc01g079710	SL3.0ch01	78684284	78686284	-	495	314	498	232	61.187	68.219	7.03253	0.0146262	0.327682	5.39416	0.240894	1
Solyc01g079740	SL3.0ch01	78732540	78734540	+	649	777	555	542	45.512	50.593	5.0806	0.0326284	0.403539	-0.425764	0.712506	1
Solyc01g079790	SL3.0ch01	78779894	78781894	+	29	1051	63	929	2.685	6.351	3.66562	0.000386722	-1.31497	2.52159	0.0633894	1
Solyc01g079890	SL3.0ch01	78929537	78931537	-	236	524	276	343	31.053	44.588	13.5354	2.70387e-06	0	-3.86883	1	1
Solyc01g079900	SL3.0ch01	78930988	78932988	-	279	578	334	461	32.555	42.013	9.45715	0.000499738	-2.76115	-3.83217	0.673097	1
Solyc01g079930	SL3.0ch01	78946295	78948295	-	1448	628	1289	383	69.75	77.093	7.34378	4.81923e-06	0.41891	-2.09762	0.858055	1
Solyc01g080020	SL3.0ch01	79002938	79004938	-	963	754	931	599	56.086	60.85	4.76348	0.0180451	-2.04508	5.74884	4.42576e-06	0.00152212
Solyc01g080110	SL3.0ch01	79126934	79128934	-	626	351	718	296	64.074	70.809	6.73498	0.00522604	-0.128978	5.09279	0.654255	1
Solyc01g080190	SL3.0ch01	79255398	79257398	+	6	595	20	504	0.998	3.817	2.81846	0.00795751	0	-3.91086	1	1
Solyc01g080230	SL3.0ch01	79293274	79295274	+	1034	622	1110	535	62.44	67.477	5.03759	0.00864463	0	-2.08054	1	1
Solyc01g080300	SL3.0ch01	79389686	79391686	+	364	688	398	606	34.601	39.641	5.04067	0.0463231	-0.238868	3.3809	0.554895	1
Solyc01g080340	SL3.0ch01	79416384	79418384	-	338	614	339	434	35.504	43.855	8.35091	0.00201371	0.219473	4.06039	0.520352	1
Solyc01g080363	SL3.0ch01	79453724	79455724	-	1	171	21	229	0.581	8.4	7.8186	0.000971979	0	-3.76338	1	1
Solyc01g080410	SL3.0ch01	79506887	79508887	+	74	382	141	352	16.228	28.6	12.3723	4.93795e-05	0.0349066	8.22478	0.94243	1
Solyc01g080440	SL3.0ch01	79540068	79542068	-	395	843	622	515	31.906	54.705	22.7991	2.63855e-27	0	-3.91086	1	1
Solyc01g080450	SL3.0ch01	79546107	79548107	-	600	703	559	374	46.048	59.914	13.8667	2.19166e-09	-0.102696	4.11805	0.751339	1
Solyc01g080690	SL3.0ch01	79783463	79785463	+	142	603	119	331	19.06	26.444	7.38404	0.0103205	0.0868546	6.01117	0.753002	1
Solyc01g080780	SL3.0ch01	79868181	79870181	+	277	50	293	27	84.709	91.563	6.85302	0.0215163	-0.126165	3.77512	0.74818	1
Solyc01g080880	SL3.0ch01	80055841	80057841	-	555	584	557	470	48.727	54.236	5.50868	0.029418	0.0714707	6.40374	0.7716	1
Solyc01g080930	SL3.0ch01	80132798	80134798	-	144	643	129	380	18.297	25.344	7.04648	0.00931704	-0.210123	6.65767	0.407349	1
Solyc01g080960	SL3.0ch01	80150343	80152343	-	442	1173	439	873	27.368	33.46	6.09194	0.00174316	0	-3.79751	1	1
Solyc01g080970	SL3.0ch01	80157674	80159674	+	1250	350	1141	254	78.125	81.792	3.66711	0.0345716	0	-3.49762	1	1
Solyc01g080980	SL3.0ch01	80166448	80168448	+	246	826	299	709	22.948	29.663	6.71494	0.0025518	0	-3.91086	1	1
Solyc01g080990	SL3.0ch01	80166796	80168796	+	272	1188	324	873	18.63	27.068	8.43753	2.8042e-06	-1.23315	-1.88503	0.482796	1
Solyc01g081070	SL3.0ch01	80248901	80250901	+	1065	448	1026	355	70.39	74.294	3.90404	0.0465684	0.133612	6.28844	0.657573	1
Solyc01g081090	SL3.0ch01	80287067	80289067	-	296	1865	282	1339	13.697	17.397	3.69931	0.006941	0.611251	-2.90335	0.834554	1
Solyc01g081110	SL3.0ch01	80300423	80302423	-	16	212	37	161	7.018	18.687	11.6693	0.00167993	-0.369534	0.6208	0.503753	1
Solyc01g081115	SL3.0ch01	80304162	80306162	-	235	394	130	142	37.361	47.794	10.4332	0.012689	-0.263946	-1.13945	0.788643	1
Solyc01g081140	SL3.0ch01	80312218	80314218	+	596	427	633	331	58.26	65.664	7.40388	0.00316564	1.78816	-3.87428	1	1
Solyc01g081173	SL3.0ch01	80330184	80332184	-	533	307	560	233	63.452	70.618	7.16553	0.00804534	-1.53815	-2.2424	0.187116	1
Solyc01g081220	SL3.0ch01	80354221	80356221	-	3746	448	3462	327	89.318	91.37	2.05168	0.0077195	0	-3.91086	1	1
Solyc01g081240	SL3.0ch01	80363060	80365060	-	961	713	975	602	57.407	61.826	4.41884	0.029488	0.161508	2.43145	0.725188	1
Solyc01g081270	SL3.0ch01	80368863	80370863	+	549	701	599	579	43.92	50.849	6.9289	0.00280328	0.777676	3.87238	0.224948	1
Solyc01g081310	SL3.0ch01	80394371	80396371	+	74	386	151	205	16.087	42.416	26.3288	3.01804e-15	0.416157	2.61312	0.461184	1
Solyc01g081430	SL3.0ch01	80497126	80499126	+	1307	1388	1330	1002	48.497	57.033	8.53537	2.62281e-08	0.21787	2.56369	0.63835	1
Solyc01g081470	SL3.0ch01	80539956	80541956	-	14	239	24	86	5.534	21.818	16.2846	7.51423e-05	-0.23096	3.91801	0.457885	1
Solyc01g081545	SL3.0ch01	80597638	80599638	-	284	690	282	523	29.158	35.031	5.87295	0.0249924	0.715551	2.50438	0.404865	1
Solyc01g081570	SL3.0ch01	80617621	80619621	+	469	198	513	140	70.315	78.56	8.24565	0.00285503	0.134089	6.16672	0.675463	1
Solyc01g081620	SL3.0ch01	80666486	80668486	+	588	462	679	384	56	63.876	7.87582	0.00117301	1.44189	-1.00136	0.438444	1
Solyc01g073670	SL3.0ch01	80930440	80932440	-	82	1152	92	767	6.645	10.71	4.06507	0.00483144	-1.7264	-1.35731	0.37498	1
Solyc01g073690	SL3.0ch01	80940404	80942404	-	6	340	53	615	1.734	7.934	6.20003	0.000177241	-0.222027	7.31667	0.405091	1
Solyc01g073695	SL3.0ch01	80952515	80954515	+	280	642	291	492	30.369	37.165	6.79599	0.0110492	0	-3.91086	1	1
Solyc01g073755	SL3.0ch01	81027840	81029840	+	3	422	11	330	0.706	3.226	2.51992	0.0329113	-0.601116	0.0317573	0.41112	1
Solyc01g073800	SL3.0ch01	81042361	81044361	-	1313	526	1500	443	71.397	77.2	5.80271	0.000302868	-0.800913	-2.52635	0.589866	1
Solyc01g073840	SL3.0ch01	81069641	81071641	-	142	627	186	437	18.466	29.856	11.39	8.90972e-06	0.534676	-3.0414	0.877559	1
Solyc01g073860	SL3.0ch01	81080113	81082113	-	390	413	372	250	48.568	59.807	11.2392	0.000194156	-1.92039	-3.7552	1	1
Solyc01g073870	SL3.0ch01	81093427	81095427	-	1207	794	1263	633	60.32	66.614	6.29408	0.000308178	0.318017	5.00869	0.271737	1
Solyc01g073890	SL3.0ch01	81094087	81096087	+	637	1173	627	979	35.193	39.041	3.84773	0.0484443	1.23247	3.1285	0.14273	1
Solyc01g073880	SL3.0ch01	81097919	81099919	-	181	604	243	609	23.057	28.521	5.4638	0.0332164	-0.323604	-0.43865	0.849709	1
Solyc01g086640	SL3.0ch01	81491849	81493849	+	103	901	108	618	10.259	14.876	4.61707	0.0144272	0.464363	5.93811	0.457644	1
Solyc01g086650	SL3.0ch01	81503084	81505084	-	569	157	614	112	78.375	84.573	6.19835	0.00991116	0.366162	3.97708	0.259852	1
Solyc01g086660	SL3.0ch01	81506158	81508158	-	495	608	467	442	44.878	51.375	6.49753	0.0131263	0.850411	5.2799	0.410958	1
Solyc01g086670	SL3.0ch01	81509474	81511474	-	957	586	858	417	62.022	67.294	5.27208	0.0126373	0.917793	4.5299	0.41485	1
Solyc01g086680	SL3.0ch01	81516595	81518595	+	253	996	291	854	20.256	25.415	5.15864	0.00984282	4.02597	4.58389	0.0037698	0.263871
Solyc01g086690	SL3.0ch01	81526401	81528401	-	391	518	497	326	43.014	60.389	17.3745	1.25746e-11	-0.23397	0.615153	0.80686	1
Solyc01g086740	SL3.0ch01	81561224	81563224	+	587	646	537	362	47.607	59.733	12.1256	4.00283e-07	-0.0184182	6.30453	0.947731	1
Solyc01g086750	SL3.0ch01	81592053	81594053	-	1727	606	1808	539	74.025	77.035	3.00965	0.0416304	0.202167	6.94739	0.492896	1
Solyc01g086770	SL3.0ch01	81604351	81606351	+	2274	258	1987	174	89.81	91.948	2.13775	0.0333243	0	-3.91086	1	1
Solyc01g086790	SL3.0ch01	81611684	81613684	+	25	589	44	396	4.072	10	5.92834	0.00106107	0	-3.91086	1	1
Solyc01g086810	SL3.0ch01	81631138	81633138	-	207	772	228	564	21.144	28.788	7.64385	0.00124037	-0.050923	4.78978	0.873492	1
Solyc01g086820	SL3.0ch01	81640254	81642254	-	275	607	243	241	31.179	50.207	19.0275	1.64721e-10	0.027973	3.55612	0.968426	1
Solyc01g086890	SL3.0ch01	81690671	81692671	-	872	453	1000	424	65.811	70.225	4.4134	0.0353087	-0.0633665	7.66441	0.800381	1
Solyc01g086893	SL3.0ch01	81689326	81691326	-	473	596	549	391	44.247	58.404	14.1573	4.93965e-09	-0.00436834	2.59134	1	1
Solyc01g086897	SL3.0ch01	81690119	81692119	+	505	601	588	480	45.66	55.056	9.39614	9.00966e-05	0	-3.91086	1	1
Solyc01g086900	SL3.0ch01	81691027	81693027	+	655	693	769	661	48.591	53.776	5.18572	0.0202336	-0.511533	3.32123	0.180578	1
Solyc01g086930	SL3.0ch01	81714878	81716878	-	1148	847	1083	428	57.544	71.674	14.1305	2.33847e-16	-0.498849	1.01145	0.498674	1
Solyc01g086920	SL3.0ch01	81700614	81702614	+	159	925	169	667	14.668	20.215	5.54741	0.00559185	-0.32951	0.458823	0.710701	1
Solyc01g086950	SL3.0ch01	81722386	81724386	+	1280	383	1305	249	76.969	83.977	7.0075	6.2808e-06	0.365146	3.10729	0.38742	1
Solyc01g087035	SL3.0ch01	81830256	81832256	-	1254	309	1259	248	80.23	83.543	3.31314	0.0450434	0.544244	0.150506	0.47496	1
Solyc01g087070	SL3.0ch01	81890250	81892250	-	38	428	41	267	8.155	13.312	5.15718	0.0495214	0.243631	2.79942	0.717375	1
Solyc01g087080	SL3.0ch01	81889287	81891287	+	88	336	87	202	20.755	30.104	9.34909	0.0176791	-0.398682	0.238367	0.645683	1
Solyc01g087190	SL3.0ch01	82002516	82004516	-	411	397	402	255	50.866	61.187	10.3209	0.000526312	0.325976	3.3241	0.372807	1
Solyc01g087290	SL3.0ch01	82104422	82106422	-	101	453	185	458	18.231	28.771	10.5403	0.000162173	-0.0177711	4.81607	0.953468	1
Solyc01g087320	SL3.0ch01	82142656	82144656	-	1002	561	1056	478	64.107	68.84	4.73215	0.0166013	0.127244	4.29654	0.70177	1
Solyc01g087385	SL3.0ch01	82215000	82217000	-	26	525	130	465	4.719	21.849	17.13	1.07025e-16	0.523276	2.95599	0.21514	1
Solyc01g087480	SL3.0ch01	82309816	82311816	+	88	2192	106	1358	3.86	7.24	3.38079	5.76204e-05	0	-3.82514	1	1
Solyc01g087510	SL3.0ch01	82333653	82335653	-	339	461	392	415	42.375	48.575	6.19997	0.0354412	0	-3.91086	1	1
Solyc01g087565	SL3.0ch01	82394234	82396234	+	245	479	243	322	33.84	43.009	9.16907	0.00335923	0	-3.71806	1	1
Solyc01g087740	SL3.0ch01	82540507	82542507	+	496	441	518	308	52.935	62.712	9.77697	0.000257044	-0.872356	-2.24357	0.552231	1
Solyc01g087750	SL3.0ch01	82555152	82557152	-	22	13	102	18	62.857	85	22.1429	0.0208678	-2.74188	-1.56703	0.0356833	0.880828
Solyc01g087830	SL3.0ch01	82585780	82587780	+	621	545	563	392	53.259	58.953	5.69387	0.0259628	-2.16899	-1.68436	0.0313608	0.825939
Solyc01g088020	SL3.0ch01	82742192	82744192	+	283	439	351	386	39.197	47.626	8.42883	0.00495775	-0.0918519	7.50668	0.747455	1
Solyc01g088080	SL3.0ch01	82790937	82792937	+	1138	253	1107	162	81.812	87.234	5.4224	0.000648733	-0.0105483	6.60394	0.968996	1
Solyc01g088230	SL3.0ch01	82918815	82920815	+	452	587	389	383	43.503	50.389	6.88523	0.0135069	-2.72201	-3.66207	0.674332	1
Solyc01g088200	SL3.0ch01	82919544	82921544	+	509	745	477	534	40.59	47.181	6.5909	0.00681202	-0.724912	0.646277	0.343341	1
Solyc01g088245	SL3.0ch01	82928862	82930862	+	165	496	171	285	24.962	37.5	12.5378	6.5328e-05	0.173796	4.8708	0.612231	1
Solyc01g088310	SL3.0ch01	82955838	82957838	+	12	429	30	352	2.721	7.853	5.13231	0.00483021	-0.22679	4.08176	0.519835	1
Solyc01g088390	SL3.0ch01	83040326	83042326	-	999	328	928	241	75.283	79.384	4.1015	0.0369179	-0.0762992	2.38701	0.901773	1
Solyc01g088410	SL3.0ch01	83084769	83086769	+	995	636	772	403	61.006	65.702	4.69661	0.0297269	0	-3.91086	1	1
Solyc01g088520	SL3.0ch01	83163813	83165813	-	1268	579	1267	470	68.652	72.942	4.28999	0.0160481	-0.442264	-0.268156	0.663995	1
Solyc01g088530	SL3.0ch01	83175254	83177254	+	231	679	273	546	25.385	33.333	7.94872	0.00152693	0.346974	0.703367	0.652185	1
Solyc01g088540	SL3.0ch01	83199081	83201081	+	24	331	69	393	6.761	14.935	8.1745	0.00117027	0	-3.91086	1	1
Solyc01g088760	SL3.0ch01	83388260	83390260	+	77	389	62	188	16.524	24.8	8.27639	0.0265979	0.578767	5.66555	0.137241	1
Solyc01g089870	SL3.0ch01	83473377	83475377	-	87	373	92	209	18.913	30.565	11.6517	0.00123061	-0.581875	4.92363	0.101173	1
Solyc01g089903	SL3.0ch01	83485570	83487570	-	5	565	9	274	0.877	3.18	2.30302	0.0456919	0.138954	2.06942	0.773923	1
Solyc01g089907	SL3.0ch01	83493671	83495671	-	575	220	577	151	72.327	79.258	6.9312	0.00685666	1.09612	0.721924	0.0901923	1
Solyc01g089920	SL3.0ch01	83503274	83505274	+	368	657	292	349	35.902	45.554	9.65138	0.000626433	1.78816	-3.87428	1	1
Solyc01g089940	SL3.0ch01	83521680	83523680	-	254	673	402	767	27.4	34.388	6.98815	0.00279788	-0.871861	-3.67132	0.857191	1
Solyc01g089970	SL3.0ch01	83558253	83560253	+	579	440	688	396	56.82	63.469	6.64822	0.00753687	0.2506	8.72982	0.411836	1
Solyc01g089980	SL3.0ch01	83569699	83571699	-	220	891	282	762	19.802	27.011	7.20951	0.000495278	-0.525158	5.58716	0.0757929	1
Solyc01g090090	SL3.0ch01	83622794	83624794	-	484	267	496	161	64.447	75.495	11.0473	5.87795e-05	0	-3.87049	1	1
Solyc01g090110	SL3.0ch01	83633970	83635970	-	561	894	615	661	38.557	48.197	9.64079	4.09876e-06	1.98554	-3.03987	0.457451	1
Solyc01g090220	SL3.0ch01	83732906	83734906	-	126	267	152	203	32.061	42.817	10.7558	0.00865036	0	-3.91086	1	1
Solyc01g090250	SL3.0ch01	83786611	83788611	+	40	211	70	151	15.936	31.674	15.738	0.000455688	0.225909	0.636838	0.786207	1
Solyc01g090260	SL3.0ch01	83796141	83798141	+	44	603	77	446	6.801	14.723	7.92214	8.78699e-05	0.398697	2.593	0.367332	1
Solyc01g090320	SL3.0ch01	83853066	83855066	-	948	307	881	202	75.538	81.348	5.81026	0.0032081	1.23331	-2.94217	0.731944	1
Solyc01g090410	SL3.0ch01	83961063	83963063	+	553	435	522	306	55.972	63.043	7.07182	0.00880821	-0.590597	-1.66288	0.539679	1
Solyc01g090430	SL3.0ch01	83994206	83996206	+	805	228	810	95	77.928	89.503	11.5744	1.23298e-10	0.498213	3.65123	0.245314	1
Solyc01g090470	SL3.0ch01	84025929	84027929	+	787	1017	614	649	43.625	48.614	4.98913	0.0189787	0.105382	5.6764	0.687234	1
Solyc01g090710	SL3.0ch01	84222861	84224861	+	1003	1118	962	920	47.289	51.116	3.82682	0.0394067	-2.17859	-0.593535	0.0311478	0.823769
Solyc01g090720	SL3.0ch01	84227366	84229366	+	250	739	303	648	25.278	31.861	6.58314	0.00574906	0.306405	4.48236	0.300998	1
Solyc01g090830	SL3.0ch01	84403912	84405912	+	429	137	482	109	75.795	81.557	5.76163	0.042462	0	-3.91086	1	1
Solyc01g090850	SL3.0ch01	84430762	84432762	+	804	329	871	276	70.962	75.937	4.97518	0.0222631	0.196707	3.97758	0.526431	1
Solyc01g091100	SL3.0ch01	84691079	84693079	-	187	862	204	702	17.827	22.517	4.69005	0.0285452	1.83429	-2.16539	1	1
Solyc01g091370	SL3.0ch01	84882234	84884234	-	350	1214	419	1040	22.379	28.718	6.33978	0.000426425	0.359837	1.99081	0.746574	1
Solyc01g091380	SL3.0ch01	84898148	84900148	-	7691	636	7560	539	92.362	93.345	0.982662	0.0380284	-0.250963	1.88946	0.625677	1
Solyc01g091385	SL3.0ch01	84889852	84891852	+	82	453	76	240	15.327	24.051	8.72353	0.006936	0.411575	1.59863	0.418895	1
Solyc01g091410	SL3.0ch01	84914774	84916774	-	354	759	319	545	31.806	36.921	5.11537	0.0448485	0	-3.91086	1	1
Solyc01g091435	SL3.0ch01	84934427	84936427	-	65	95	104	80	40.625	56.522	15.8967	0.0117011	-1.31618	-1.38254	0.142157	1
Solyc01g091470	SL3.0ch01	84973514	84975514	+	113	820	151	718	12.111	17.376	5.26483	0.00634736	0.237883	-1.1827	0.88266	1
Solyc01g091500	SL3.0ch01	85007901	85009901	-	114	427	223	356	21.072	38.515	17.4426	3.87588e-09	0.0177085	3.68408	0.963433	1
Solyc01g091580	SL3.0ch01	85054401	85056401	-	332	906	417	845	26.817	33.043	6.22534	0.0032649	-0.21652	4.69762	0.507765	1
Solyc01g091600	SL3.0ch01	85064242	85066242	-	428	680	513	658	38.628	43.809	5.18055	0.0343787	0.254414	4.91994	0.356719	1
Solyc01g091620	SL3.0ch01	85076647	85078647	-	348	504	358	364	40.845	49.584	8.73942	0.00244808	0.257817	5.82278	0.383388	1
Solyc01g091670	SL3.0ch01	85136987	85138987	+	894	736	843	571	54.847	59.618	4.77148	0.0230837	-3.39832	-3.51261	0.420954	1
Solyc01g091720	SL3.0ch01	85188352	85190352	+	1	481	8	393	0.207	1.995	1.78754	0.0344157	0.0387558	3.10699	0.919639	1
Solyc01g091830	SL3.0ch01	85255041	85257041	+	129	657	201	676	16.412	22.919	6.50683	0.00367661	2.16196	-3.18121	0.293114	1
Solyc01g091850	SL3.0ch01	85269193	85271193	+	335	237	289	86	58.566	77.067	18.5002	5.30348e-08	0.689631	0.228242	0.316559	1
Solyc01g094030	SL3.0ch01	85485876	85487876	-	779	243	788	141	76.223	84.822	8.5993	1.85458e-05	0.119379	6.3049	0.67012	1
Solyc01g094040	SL3.0ch01	85489626	85491626	-	741	242	714	173	75.381	80.496	5.11457	0.0242964	0.548557	5.78211	0.132834	1
Solyc01g094140	SL3.0ch01	85572407	85574407	-	127	520	129	310	19.629	29.385	9.75591	0.0013183	0.364048	-0.421066	0.677939	1
Solyc01g094170	SL3.0ch01	85622084	85624084	-	731	847	730	710	46.324	50.694	4.36998	0.0425206	0.0133965	5.74051	0.968837	1
Solyc01g094180	SL3.0ch01	85622250	85624250	+	731	790	728	635	48.06	53.412	5.35111	0.0143888	0.130597	0.50897	0.877699	1
Solyc01g094350	SL3.0ch01	85735518	85737518	+	54	1423	75	1252	3.656	5.652	1.99579	0.0363203	0.0229118	5.86951	0.928736	1
Solyc01g094380	SL3.0ch01	85766259	85768259	+	714	2090	662	1383	25.464	32.372	6.90801	1.91828e-06	0	-3.17729	1	1
Solyc01g094460	SL3.0ch01	85810176	85812176	-	296	730	208	324	28.85	39.098	10.2478	0.000309833	-0.428885	3.63027	0.264506	1
Solyc01g094510	SL3.0ch01	85829398	85831398	+	543	1078	486	777	33.498	38.48	4.98197	0.0181163	-0.906724	-2.44817	0.585892	1
Solyc01g094530	SL3.0ch01	85847022	85849022	-	69	238	81	149	22.476	35.217	12.7418	0.00514264	0.16047	4.63686	0.572326	1
Solyc01g094540	SL3.0ch01	85848298	85850298	-	69	404	81	208	14.588	28.028	13.4399	6.90558e-05	0.117251	4.27164	0.740776	1
Solyc01g094550	SL3.0ch01	85848993	85850993	+	191	523	227	406	26.751	35.861	9.11028	0.00156421	0.243415	5.28144	0.438052	1
Solyc01g094580	SL3.0ch01	85881792	85883792	-	854	162	926	114	84.055	89.038	4.98334	0.00392774	0.202809	4.35342	0.5634	1
Solyc01g094585	SL3.0ch01	85882438	85884438	-	1155	168	1366	116	87.302	92.173	4.87115	0.000168033	-1.62217	-3.73635	0.668043	1
Solyc01g094690	SL3.0ch01	86009825	86011825	+	572	934	579	760	37.981	43.241	5.25982	0.0145191	-0.0406147	5.78011	0.923265	1
Solyc01g094760	SL3.0ch01	86056710	86058710	-	210	1006	226	476	17.27	32.194	14.924	3.81714e-12	-0.016952	2.57632	0.976858	1
Solyc01g094780	SL3.0ch01	86067009	86069009	-	936	997	841	742	48.422	53.127	4.70483	0.0179719	0.13763	2.07306	0.756194	1
Solyc01g094840	SL3.0ch01	86129321	86131321	-	540	798	595	664	40.359	47.26	6.90099	0.00198876	-0.121969	3.74158	0.731968	1
Solyc01g094850	SL3.0ch01	86129367	86131367	+	471	793	504	666	37.263	43.077	5.81426	0.0122198	0	-3.91086	1	1
Solyc01g094890	SL3.0ch01	86174418	86176418	-	634	441	597	332	58.977	64.263	5.2859	0.0405712	-0.717065	-1.20307	0.501285	1
Solyc01g094900	SL3.0ch01	86176173	86178173	+	168	565	131	311	22.92	29.638	6.7185	0.032762	0	-3.91086	1	1
Solyc01g094940	SL3.0ch01	86216130	86218130	+	342	753	376	577	31.233	39.454	8.22148	0.000645872	0.596539	4.92307	0.0529802	1
Solyc01g095040	SL3.0ch01	86291738	86293738	-	114	768	195	659	12.925	22.834	9.90855	9.95752e-07	0.104622	6.21027	0.721209	1
Solyc01g095060	SL3.0ch01	86301305	86303305	-	1902	1188	1698	889	61.553	65.636	4.08247	0.00559566	0.0270064	2.79518	0.949938	1
Solyc01g095200	SL3.0ch01	86418730	86420730	+	141	545	179	443	20.554	28.778	8.2242	0.00277968	0	-3.86778	1	1
Solyc01g095210	SL3.0ch01	86437516	86439516	-	1489	807	1524	672	64.852	69.399	4.54699	0.00474111	-0.0738621	5.56204	0.778318	1
Solyc01g095430	SL3.0ch01	86558588	86560588	-	396	617	391	460	39.092	45.946	6.85414	0.0102293	-0.486687	6.23019	0.198908	1
Solyc01g095470	SL3.0ch01	86588662	86590662	+	631	605	635	486	51.052	56.646	5.59407	0.0206356	-0.0846153	6.07678	0.83738	1
Solyc01g095500	SL3.0ch01	86615229	86617229	+	278	1091	312	967	20.307	24.394	4.08726	0.0306206	0.427623	3.57567	0.385103	1
Solyc01g095620	SL3.0ch01	86705290	86707290	-	772	831	751	642	48.16	53.912	5.75272	0.00677369	-0.339885	5.7018	0.717782	1
Solyc01g095650	SL3.0ch01	86738343	86740343	-	1567	264	1331	157	85.582	89.449	3.86728	0.00386108	0.0682765	-1.51714	0.977355	1
Solyc01g095710	SL3.0ch01	86770113	86772113	+	588	268	442	152	68.692	74.411	5.71919	0.0440726	0.392427	3.48602	0.422883	1
Solyc01g095720	SL3.0ch01	86783925	86785925	+	402	810	364	592	33.168	38.075	4.907	0.0441075	-1.73485	-0.635361	0.174186	1
Solyc01g095730	SL3.0ch01	86796231	86798231	+	587	799	656	724	42.352	47.536	5.18414	0.0194629	0.286734	4.36634	0.526555	1
Solyc01g095780	SL3.0ch01	86843880	86845880	-	467	397	441	266	54.051	62.376	8.32531	0.00410712	4.63893	-3.52653	0.27123	1
Solyc01g095790	SL3.0ch01	86847418	86849418	+	340	533	340	241	38.946	58.52	19.5736	6.75595e-12	0.21243	6.29457	0.556836	1
Solyc01g095950	SL3.0ch01	86944858	86946858	+	495	989	512	790	33.356	39.324	5.96832	0.00469803	1.81067	-3.56171	1	1
Solyc01g096030	SL3.0ch01	86998330	87000330	-	427	819	481	680	34.27	41.43	7.16014	0.00146856	-0.0845005	3.3166	0.811957	1
Solyc01g096230	SL3.0ch01	87195773	87197773	-	54	740	84	672	6.801	11.111	4.3101	0.0106387	0.527091	5.39147	0.105155	1
Solyc01g096240	SL3.0ch01	87202793	87204793	+	411	1242	391	965	24.864	28.835	3.97092	0.0363649	-0.453653	6.09913	0.154237	1
Solyc01g096255	SL3.0ch01	87211224	87213224	-	37	341	98	429	9.788	18.596	8.80747	0.00111192	0	-3.91086	1	1
Solyc01g096280	SL3.0ch01	87238789	87240789	-	944	962	957	830	49.528	53.553	4.02563	0.0368617	0.143189	0.110368	0.897103	1
Solyc01g096340	SL3.0ch01	87288004	87290004	+	339	693	358	584	32.849	38.004	5.15541	0.0436314	0.240793	5.99339	0.460126	1
Solyc01g096400	SL3.0ch01	87374121	87376121	+	1720	504	1766	429	77.338	80.456	3.11745	0.0316106	-1.08813	1.68322	0.0408143	0.928674
Solyc01g096460	SL3.0ch01	87421733	87423733	+	181	667	204	485	21.344	29.608	8.26379	0.00121721	0.30751	3.47571	0.406653	1
Solyc01g096540	SL3.0ch01	87505027	87507027	-	279	361	231	217	43.594	51.563	7.96875	0.0299487	-0.0406781	4.98674	0.906829	1
Solyc01g096740	SL3.0ch01	87633782	87635782	-	553	681	567	493	44.814	53.491	8.67695	0.000256393	-1.36676	2.68331	0.0873994	1
Solyc01g096730	SL3.0ch01	87622530	87624530	-	1856	933	1634	686	66.547	70.431	3.88388	0.010381	-0.0458202	1.18728	0.973211	1
Solyc01g096820	SL3.0ch01	87690376	87692376	+	736	1066	759	855	40.844	47.026	6.18252	0.00142589	2.74756	-2.35587	0.113333	1
Solyc01g096830	SL3.0ch01	87713156	87715156	-	426	679	427	487	38.552	46.718	8.16569	0.00124564	0.333214	5.28684	0.481408	1
Solyc01g096840	SL3.0ch01	87717808	87719808	-	209	1020	284	815	17.006	25.842	8.83598	2.28317e-06	-1.13719	-2.04122	0.325174	1
Solyc01g096950	SL3.0ch01	87827122	87829122	+	678	397	631	295	63.07	68.143	5.07278	0.0437338	-0.785574	0.00977168	0.362657	1
Solyc01g096990	SL3.0ch01	87845146	87847146	+	398	521	396	376	43.308	51.295	7.98739	0.00426325	0.211669	5.24475	0.44485	1
Solyc01g097080	SL3.0ch01	87915766	87917766	-	213	260	665	227	45.032	74.552	29.5199	6.76389e-25	-2.54467	-3.70159	0.687205	1
Solyc01g097130	SL3.0ch01	87966675	87968675	+	150	697	131	404	17.71	24.486	6.77642	0.00885538	0.0974294	3.58768	0.785157	1
Solyc01g097140	SL3.0ch01	87971329	87973329	+	457	431	534	394	51.464	57.543	6.07914	0.0260533	0.236193	4.85961	0.446554	1
Solyc01g097160	SL3.0ch01	87980565	87982565	+	1598	901	1711	829	63.946	67.362	3.41663	0.0286445	-0.931519	4.39827	0.00638836	0.366184
Solyc01g097195	SL3.0ch01	88023370	88025370	+	116	457	184	378	20.244	32.74	12.4959	2.00369e-05	1.8913	-3.79288	1	1
Solyc01g097230	SL3.0ch01	88037002	88039002	-	44	453	118	437	8.853	21.261	12.4081	2.60141e-07	0.550918	3.46688	0.114887	1
Solyc01g097250	SL3.0ch01	88047550	88049550	-	64	636	72	364	9.143	16.514	7.3709	0.00158975	-0.0719215	4.52354	0.80918	1
Solyc01g097280	SL3.0ch01	88059539	88061539	-	524	505	523	389	50.923	57.346	6.42326	0.0146975	4.14286	-0.902022	0.126668	1
Solyc01g097390	SL3.0ch01	88140785	88142785	+	480	658	504	472	42.179	51.639	9.46008	0.000108025	-1.00968	1.88685	0.313434	1
Solyc01g097630	SL3.0ch01	88273894	88275894	+	105	167	176	165	38.603	51.613	13.01	0.00557509	0.359509	-0.882109	0.753854	1
Solyc01g097640	SL3.0ch01	88281044	88283044	+	970	364	1176	315	72.714	78.873	6.1596	0.000799077	0.0779484	4.86987	0.83312	1
Solyc01g097700	SL3.0ch01	88315518	88317518	+	315	514	300	367	37.998	44.978	6.97992	0.0202632	-1.94065	-3.72817	1	1
Solyc01g097710	SL3.0ch01	88320694	88322694	+	105	397	220	427	20.916	34.003	13.0868	9.29043e-06	1.24923	-2.26563	0.336686	1
Solyc01g097780	SL3.0ch01	88370118	88372118	+	149	554	152	407	21.195	27.191	5.99653	0.0351187	0	-3.91086	1	1
Solyc01g097825	SL3.0ch01	88403697	88405697	-	35	187	57	70	15.766	44.882	29.1161	1.00067e-07	-1.92464	-2.01402	0.167156	1
Solyc01g097830	SL3.0ch01	88405173	88407173	-	148	1038	174	884	12.479	16.446	3.9672	0.0224005	0	-3.91086	1	1
Solyc01g097850	SL3.0ch01	88427817	88429817	+	148	397	209	413	27.156	33.601	6.44532	0.0438298	0	-3.71273	1	1
Solyc01g097940	SL3.0ch01	88482966	88484966	+	202	681	199	474	22.877	29.569	6.69254	0.0112893	-1.91429	-3.87151	1	1
Solyc01g097990	SL3.0ch01	88512555	88514555	-	23	326	25	168	6.59	12.953	6.36311	0.0414586	0.147274	1.36296	0.857534	1
Solyc01g098000	SL3.0ch01	88511418	88513418	+	30	312	24	118	8.772	16.901	8.12948	0.0401497	-2.2923	-3.47118	0.355419	1
Solyc01g098050	SL3.0ch01	88527921	88529921	-	855	1242	815	886	40.773	47.913	7.14046	7.99654e-05	1.89816	-3.83241	1	1
Solyc01g098070	SL3.0ch01	88543141	88545141	-	1997	323	1999	260	86.078	88.49	2.4129	0.0367565	0	-3.91086	1	1
Solyc01g098170	SL3.0ch01	88617825	88619825	+	339	287	302	177	54.153	63.048	8.89466	0.0106144	0.0804808	5.41241	0.782951	1
Solyc01g098210	SL3.0ch01	88677949	88679949	-	833	711	707	474	53.951	59.865	5.91374	0.00748313	0.183919	4.79678	0.55471	1
Solyc01g098220	SL3.0ch01	88681235	88683235	-	6	506	91	364	1.172	20	18.8281	2.59599e-23	-3.92692	-3.66729	0.360173	1
Solyc01g098230	SL3.0ch01	88679181	88681181	+	730	930	613	592	43.976	50.871	6.89547	0.00136347	0.458579	4.70156	0.145773	1
Solyc01g098330	SL3.0ch01	88758651	88760651	+	1	321	13	357	0.311	3.514	3.20295	0.00794691	0	-3.91086	1	1
Solyc01g098500	SL3.0ch01	88881753	88883753	+	418	1110	405	853	27.356	32.194	4.83794	0.0176156	0.094489	2.78318	0.83317	1
Solyc01g098600	SL3.0ch01	88948935	88950935	+	212	631	322	588	25.148	35.385	10.2363	3.10239e-05	0	-3.91086	1	1
Solyc01g098690	SL3.0ch01	88987481	88989481	+	31	302	94	310	9.309	23.267	13.958	3.91577e-06	0.358687	5.07301	0.523913	1
Solyc01g098725	SL3.0ch01	89043133	89045133	+	1113	443	910	236	71.53	79.407	7.87707	2.56809e-05	0.583561	4.68942	0.19483	1
Solyc01g098740	SL3.0ch01	89057159	89059159	-	890	263	881	179	77.19	83.113	5.92327	0.002411	0.170214	4.22047	0.721769	1
Solyc01g098760	SL3.0ch01	89057097	89059097	+	890	283	881	179	75.874	83.113	7.23938	0.000185194	0.233435	6.33998	0.452158	1
Solyc01g098750	SL3.0ch01	89058282	89060282	+	899	722	895	547	55.46	62.067	6.60698	0.00121291	0.198791	3.57542	0.614517	1
Solyc01g098790	SL3.0ch01	89088125	89090125	+	79	507	79	318	13.481	19.899	6.41802	0.0224005	-0.565321	3.5246	0.355693	1
Solyc01g098810	SL3.0ch01	89098552	89100552	+	307	207	434	203	59.728	68.132	8.40424	0.0117778	-0.356815	1.62886	0.521327	1
Solyc01g098820	SL3.0ch01	89103756	89105756	+	269	565	298	467	32.254	38.954	6.70005	0.0168082	-2.76432	0.33091	0.00154635	0.147101
Solyc01g098850	SL3.0ch01	89122868	89124868	-	166	1070	165	753	13.43	17.974	4.54344	0.0141284	-1.4097	-0.854071	0.22887	1
Solyc01g098870	SL3.0ch01	89123944	89125944	+	41	381	50	196	9.716	20.325	10.6096	0.00088756	-0.0761428	6.35863	0.793753	1
Solyc01g098985	SL3.0ch01	89220207	89222207	-	843	1142	880	968	42.469	47.619	5.15053	0.00553601	-1.3364	-0.0476662	0.223619	1
Solyc01g098990	SL3.0ch01	89219885	89221885	+	843	1145	881	890	42.404	49.746	7.34148	5.54443e-05	-0.646782	5.07667	0.0400278	0.92309
Solyc01g099100	SL3.0ch01	89290421	89292421	+	499	1208	589	1038	29.233	36.202	6.96903	0.000129145	0.370202	7.53435	0.266284	1
Solyc01g099130	SL3.0ch01	89321737	89323737	+	145	260	166	148	35.802	52.866	17.0638	4.2076e-05	0	-3.91086	1	1
Solyc01g099210	SL3.0ch01	89383687	89385687	+	80	747	81	398	9.674	16.91	7.23671	0.000883582	1.89414	-3.72334	1	1
Solyc01g099230	SL3.0ch01	89405528	89407528	+	788	480	629	204	62.145	75.51	13.3651	2.31203e-09	0.552111	3.27824	0.176737	1
Solyc01g099270	SL3.0ch01	89425468	89427468	-	1003	389	820	186	72.055	81.511	9.45634	8.66436e-07	0.251316	-2.13405	0.906997	1
Solyc01g099320	SL3.0ch01	89488953	89490953	-	329	808	295	558	28.936	34.584	5.64803	0.0233755	0	-3.91086	1	1
Solyc01g099470	SL3.0ch01	89593928	89595928	+	17	508	24	278	3.238	7.947	4.70892	0.0132861	0.554173	-3.08257	0.81056	1
Solyc01g099580	SL3.0ch01	89654268	89656268	-	316	481	260	275	39.649	48.598	8.94945	0.00508169	0.269126	2.10956	0.581929	1
Solyc01g099590	SL3.0ch01	89655730	89657730	-	622	375	576	268	62.387	68.246	5.85928	0.0255175	0.220641	7.96096	0.487883	1
Solyc01g099600	SL3.0ch01	89669478	89671478	-	556	599	574	502	48.139	53.346	5.2072	0.0353864	-0.443553	6.67831	0.293186	1
Solyc01g099650	SL3.0ch01	89706909	89708909	+	769	492	666	326	60.983	67.137	6.15375	0.00931704	-3.87039	-1.62647	0.00235671	0.195127
Solyc01g099690	SL3.0ch01	89731040	89733040	+	1205	345	1114	186	77.742	85.692	7.95037	7.19148e-07	-0.196305	8.0158	0.523436	1
Solyc01g099730	SL3.0ch01	89762273	89764273	+	101	1105	167	846	8.375	16.486	8.11089	9.85188e-08	0.2302	4.51792	0.47296	1
Solyc01g099760	SL3.0ch01	89782869	89784869	+	340	200	379	96	62.963	79.789	16.8265	5.49154e-08	0.242095	7.84541	0.359954	1
Solyc01g099770	SL3.0ch01	89789988	89791988	+	924	479	920	351	65.859	72.384	6.52508	0.00136187	0.47393	12.4554	0.140529	1
Solyc01g099780	SL3.0ch01	89795797	89797797	+	449	1146	490	945	28.15	34.146	5.99587	0.00187352	0.330287	7.48772	0.299566	1
Solyc01g099800	SL3.0ch01	89826380	89828380	-	4	182	12	103	2.151	10.435	8.28424	0.00962836	0.52522	5.39882	0.110856	1
Solyc01g099860	SL3.0ch01	89873814	89875814	-	1640	680	1551	549	70.69	73.857	3.16749	0.0472996	0.0306808	4.81827	0.915314	1
Solyc01g099880	SL3.0ch01	89890786	89892786	-	232	894	349	723	20.604	32.556	11.9521	3.92789e-09	0.93087	-0.377703	0.384012	1
Solyc01g099950	SL3.0ch01	89929618	89931618	-	633	506	555	357	55.575	60.855	5.2802	0.0412319	0.414083	-2.26885	0.912083	1
Solyc01g099970	SL3.0ch01	89941739	89943739	-	281	559	285	421	33.452	40.368	6.91589	0.0154868	1.05683	4.00087	0.00751702	0.411744
Solyc01g100030	SL3.0ch01	89984440	89986440	+	211	654	220	414	24.393	34.7	10.3073	0.00010672	-0.234337	3.41254	0.666694	1
Solyc01g100120	SL3.0ch01	90095959	90097959	-	311	1218	382	1148	20.34	24.967	4.62723	0.00869499	-0.0152984	-3.33864	1	1
Solyc01g100160	SL3.0ch01	90111594	90113594	-	121	575	132	420	17.385	23.913	6.52799	0.0144474	-0.148389	4.86614	0.633226	1
Solyc01g100170	SL3.0ch01	90110834	90112834	+	121	505	132	249	19.329	34.646	15.3166	1.07099e-06	0.324631	5.16216	0.230502	1
Solyc01g100220	SL3.0ch01	90148039	90150039	-	1624	299	1463	196	84.451	88.186	3.73428	0.00518644	-0.0616358	0.528614	0.941795	1
Solyc01g100230	SL3.0ch01	90160614	90162614	-	676	283	629	200	70.49	75.875	5.38445	0.0313381	-0.329347	5.79388	0.321086	1
Solyc01g100235	SL3.0ch01	90176527	90178527	-	1046	117	902	70	89.94	92.798	2.85854	0.0485075	0	-3.91086	1	1
Solyc01g100350	SL3.0ch01	90293328	90295328	-	421	216	461	112	66.091	80.454	14.3627	2.97356e-07	0.315439	8.6254	0.239928	1
Solyc01g100390	SL3.0ch01	90316658	90318658	-	3	156	21	195	1.887	9.722	7.83543	0.0077849	0.823194	-0.0717899	0.500272	1
Solyc01g100430	SL3.0ch01	90335989	90337989	-	104	827	139	742	11.171	15.778	4.60674	0.014513	0	-3.91086	1	1
Solyc01g100450	SL3.0ch01	90350683	90352683	+	400	659	431	563	37.771	43.36	5.58868	0.0278148	0.222468	1.01447	0.683335	1
Solyc01g100510	SL3.0ch01	90396197	90398197	-	724	306	677	187	70.291	78.356	8.06522	0.000464337	0.284383	2.83321	0.52076	1
Solyc01g100590	SL3.0ch01	90453012	90455012	-	591	854	687	832	40.9	45.227	4.32747	0.0422388	0.158757	5.8915	0.63497	1
Solyc01g100670	SL3.0ch01	90530557	90532557	+	82	665	117	633	10.977	15.6	4.62276	0.0260314	0	-3.91086	1	1
Solyc01g100700	SL3.0ch01	90545827	90547827	-	958	819	850	517	53.911	62.18	8.26887	3.17025e-05	0.0230241	4.62079	0.940626	1
Solyc01g100840	SL3.0ch01	90636099	90638099	-	926	773	721	406	54.503	63.975	9.47251	6.06244e-06	0.317278	4.67581	0.336152	1
Solyc01g100870	SL3.0ch01	90650570	90652570	-	719	873	665	616	45.163	51.913	6.74925	0.00172069	0.188521	8.5039	0.530162	1
Solyc01g100930	SL3.0ch01	90701316	90703316	+	497	1110	504	924	30.927	35.294	4.36692	0.0286153	-0.7574	3.82	0.106689	1
Solyc01g100960	SL3.0ch01	90720945	90722945	-	539	1835	536	1170	22.704	31.419	8.71423	9.63368e-09	0.138264	5.07716	0.629454	1
Solyc01g100970	SL3.0ch01	90721267	90723267	+	622	1880	636	1184	24.86	34.945	10.0849	1.96524e-11	0.0744826	8.72129	0.802375	1
Solyc01g100980	SL3.0ch01	90733249	90735249	-	25	112	27	51	18.248	34.615	16.3672	0.0233661	-1.71265	-3.53354	0.477933	1
Solyc01g101060	SL3.0ch01	90793404	90795404	+	215	568	298	455	27.458	39.575	12.1165	6.12616e-06	0.388927	10.421	0.276137	1
Solyc01g101100	SL3.0ch01	90829283	90831283	-	174	875	175	598	16.587	22.639	6.05184	0.00536022	-0.344957	4.88191	0.305409	1
Solyc01g101210	SL3.0ch01	90910011	90912011	+	272	576	373	511	32.075	42.195	10.1191	0.000108918	3.39189	0.994617	0.433334	1
Solyc01g102350	SL3.0ch01	91062557	91064557	-	230	942	255	756	19.625	25.223	5.59798	0.00705768	0.585257	3.39654	0.272824	1
Solyc01g102500	SL3.0ch01	91170211	91172211	-	57	356	103	373	13.801	21.639	7.8372	0.00973957	0.0584631	3.74319	0.884705	1
Solyc01g102540	SL3.0ch01	91209283	91211283	-	118	455	137	268	20.593	33.827	13.2338	3.57116e-05	-0.0034337	5.41618	0.990732	1
Solyc01g102730	SL3.0ch01	91339245	91341245	-	202	419	255	375	32.528	40.476	7.94801	0.0128577	0.127532	2.83884	0.755841	1
Solyc01g102790	SL3.0ch01	91376664	91378664	-	22	319	39	179	6.452	17.89	11.4383	0.000258857	0	-3.91086	1	1
Solyc01g102800	SL3.0ch01	91375317	91377317	+	20	173	42	167	10.363	20.096	9.733	0.0234148	0.261017	5.30196	0.337188	1
Solyc01g102840	SL3.0ch01	91406050	91408050	+	9	337	24	366	2.601	6.154	3.55269	0.0480758	-0.510049	6.72908	0.391728	1
Solyc01g102850	SL3.0ch01	91413131	91415131	+	102	610	150	597	14.326	20.08	5.75448	0.0140362	-1.94273	-3.53668	1	1
Solyc01g102900	SL3.0ch01	91447620	91449620	-	886	804	841	571	52.426	59.561	7.13487	0.000451082	0	-3.91086	1	1
Solyc01g102920	SL3.0ch01	91453798	91455798	+	358	395	579	335	47.543	63.348	15.8048	2.04713e-09	0	-3.91086	1	1
Solyc01g102950	SL3.0ch01	91478580	91480580	+	2412	462	2123	334	83.925	86.406	2.48134	0.0316683	-2.74313	-0.196561	0.0234437	0.723497
Solyc01g103060	SL3.0ch01	91618435	91620435	+	541	754	576	565	41.776	50.482	8.70597	0.000132278	0	-3.82789	1	1
Solyc01g103070	SL3.0ch01	91619915	91621915	+	382	736	448	609	34.168	42.384	8.21595	0.000495278	0	-3.91086	1	1
Solyc01g103140	SL3.0ch01	91679822	91681822	-	260	1035	293	895	20.077	24.663	4.58608	0.0198922	0.252869	7.54052	0.462957	1
Solyc01g103160	SL3.0ch01	91703558	91705558	-	1638	275	1559	195	85.625	88.883	3.25788	0.0115191	0.605239	3.34274	0.236337	1
Solyc01g103200	SL3.0ch01	91735184	91737184	+	145	583	185	531	19.918	25.838	5.92041	0.0235378	0.20068	6.00581	0.514772	1
Solyc01g103310	SL3.0ch01	91795598	91797598	+	161	555	143	339	22.486	29.668	7.18202	0.0167306	0.0977465	2.75982	0.848038	1
Solyc01g103380	SL3.0ch01	91877192	91879192	-	1284	299	1089	194	81.112	84.879	3.76738	0.0233024	0.0277712	4.83953	0.933751	1
Solyc01g103410	SL3.0ch01	91899954	91901954	-	1121	753	1091	562	59.819	66.001	6.18264	0.000875187	0.416654	5.98967	0.151596	1
Solyc01g103415	SL3.0ch01	91901034	91903034	-	629	679	641	523	48.089	55.069	6.98004	0.00269105	0	-3.91086	1	1
Solyc01g103490	SL3.0ch01	91964316	91966316	+	684	230	610	148	74.836	80.475	5.63905	0.0199606	0.173259	3.1724	0.760229	1
Solyc01g103510	SL3.0ch01	91981591	91983591	-	2368	425	2899	392	84.783	88.089	3.30534	0.000973068	0.922714	3.21153	0.0863269	1
Solyc01g103530	SL3.0ch01	91998444	92000444	+	156	1036	226	875	13.087	20.527	7.43955	2.01061e-05	-0.260953	2.45623	0.613876	1
Solyc01g103540	SL3.0ch01	92003609	92005609	+	185	395	156	214	31.897	42.162	10.2656	0.00545614	0.264345	10.2141	0.331842	1
Solyc01g103570	SL3.0ch01	92028798	92030798	-	286	696	316	515	29.124	38.026	8.90224	0.000380707	-0.0686873	3.01705	0.869464	1
Solyc01g103670	SL3.0ch01	92094754	92096754	+	476	995	411	677	32.359	37.776	5.4168	0.0151359	-0.126274	5.39514	0.627223	1
Solyc01g103680	SL3.0ch01	92110867	92112867	-	13	628	36	802	2.028	4.296	2.26786	0.0435276	0.150408	7.24986	0.558828	1
Solyc01g103770	SL3.0ch01	92176234	92178234	-	841	761	758	555	52.497	57.73	5.23351	0.0155108	0.100999	0.804462	0.875003	1
Solyc01g103780	SL3.0ch01	92184156	92186156	-	100	919	139	860	9.814	13.914	4.10037	0.0146872	0.0345722	6.87476	0.893186	1
Solyc01g103785	SL3.0ch01	92194788	92196788	+	655	684	703	599	48.917	53.994	5.07675	0.0250782	0.354736	2.51632	0.451384	1
Solyc01g103790	SL3.0ch01	92195029	92197029	+	396	715	448	630	35.644	41.558	5.91488	0.0152887	-0.0900818	-0.386678	0.969064	1
Solyc01g103810	SL3.0ch01	92222909	92224909	-	428	219	544	179	66.151	75.242	9.09058	0.00136149	0	-3.91086	1	1
Solyc01g103850	SL3.0ch01	92241986	92243986	+	690	682	650	530	50.292	55.085	4.7932	0.0411988	0.318584	4.79592	0.265541	1
Solyc01g103960	SL3.0ch01	92328032	92330032	+	362	977	369	715	27.035	34.041	7.00549	0.0011273	0.0146314	3.35415	0.97456	1
Solyc01g103970	SL3.0ch01	92341953	92343953	+	362	398	325	167	47.632	66.057	18.4253	2.73801e-09	-0.0361017	6.41871	0.910963	1
Solyc01g104055	SL3.0ch01	92431893	92433893	-	496	420	533	354	54.148	60.09	5.94172	0.0305994	0.131422	-3.19909	1	1
Solyc01g104070	SL3.0ch01	92444272	92446272	-	498	423	489	316	54.072	60.745	6.67368	0.0165748	0.0122373	6.75495	0.968565	1
Solyc01g104100	SL3.0ch01	92457411	92459411	-	794	969	822	829	45.037	49.788	4.75114	0.0166504	0	-3.17191	1	1
Solyc01g104130	SL3.0ch01	92490454	92492454	+	1511	528	1395	393	74.105	78.02	3.91518	0.0155231	1.53754	6.90557	0.00021802	0.0345051
Solyc01g104185	SL3.0ch01	92541025	92543025	-	121	328	78	116	26.949	40.206	13.2574	0.00445903	0	-3.69457	1	1
Solyc01g104200	SL3.0ch01	92542482	92544482	-	342	748	382	655	31.376	36.837	5.46088	0.0224778	3.89805	-3.70539	0.372734	1
Solyc01g104310	SL3.0ch01	92624015	92626015	-	575	324	577	231	63.96	71.411	7.45094	0.00444405	0.031616	5.515	0.908831	1
Solyc01g104360	SL3.0ch01	92651884	92653884	-	786	871	735	684	47.435	51.797	4.36192	0.0410389	0	-3.91086	1	1
Solyc01g104380	SL3.0ch01	92662065	92664065	+	357	560	416	506	38.931	45.119	6.18801	0.0228671	2.53741	-3.80323	0.645767	1
Solyc01g104437	SL3.0ch01	92778165	92780165	-	151	85	235	6	63.983	97.51	33.5273	2.55221e-21	-0.627164	-1.40998	0.504237	1
Solyc01g104448	SL3.0ch01	92805823	92807823	+	207	96	597	94	68.317	86.397	18.0797	2.75993e-09	0	-3.83425	1	1
Solyc01g104510	SL3.0ch01	92871950	92873950	-	1369	423	1110	260	76.395	81.022	4.62681	0.00630128	0.0238703	5.33015	0.934863	1
Solyc01g104520	SL3.0ch01	92872749	92874749	+	1264	751	998	469	62.73	68.03	5.30046	0.00476377	-0.177772	-2.15511	0.900309	1
Solyc01g104630	SL3.0ch01	92959489	92961489	-	489	385	491	231	55.95	68.006	12.0559	8.71353e-06	0.236734	3.32666	0.511209	1
Solyc01g104640	SL3.0ch01	92959756	92961756	+	495	501	492	315	49.699	60.967	11.2677	1.73359e-05	0.113793	5.03331	0.695222	1
Solyc01g104725	SL3.0ch01	93018430	93020430	-	445	663	456	511	40.162	47.156	6.9937	0.00536956	0.375678	3.49099	0.324615	1
Solyc01g104840	SL3.0ch01	93068587	93070587	-	79	551	101	442	12.54	18.6	6.06069	0.0140408	0.0919704	7.45072	0.734759	1
Solyc01g104900	SL3.0ch01	93112926	93114926	-	208	609	199	419	25.459	32.201	6.74165	0.0165476	0.0497621	3.88195	0.919195	1
Solyc01g105040	SL3.0ch01	93225871	93227871	-	47	310	80	196	13.165	28.986	15.8202	1.15634e-05	0.210234	2.93667	0.593466	1
Solyc01g105050	SL3.0ch01	93225087	93227087	+	47	325	80	206	12.634	27.972	15.3376	8.81373e-06	-1.18834	5.15975	0.0287803	0.794866
Solyc01g105120	SL3.0ch01	93282318	93284318	-	361	616	350	463	36.95	43.05	6.10058	0.0244569	-0.721544	6.88472	0.0530865	1
Solyc01g105140	SL3.0ch01	93307374	93309374	-	1376	576	1306	386	70.492	77.187	6.69496	4.12305e-05	0.0471263	6.64344	0.86587	1
Solyc01g105460	SL3.0ch01	93520791	93522791	+	54	868	159	721	5.857	18.068	12.2113	1.6075e-14	-0.171501	3.19332	0.610946	1
Solyc01g105493	SL3.0ch01	93533539	93535539	-	732	384	793	285	65.591	73.562	7.97075	0.000335091	0.534316	-0.243597	0.452282	1
Solyc01g105550	SL3.0ch01	93581032	93583032	+	492	239	506	186	67.305	73.121	5.81633	0.042076	-0.809043	-2.59742	0.729104	1
Solyc01g105780	SL3.0ch01	93722774	93724774	-	483	811	610	546	37.326	52.768	15.442	5.4174e-13	0.488943	4.73846	0.211627	1
Solyc01g105790	SL3.0ch01	93729375	93731375	-	459	738	468	568	38.346	45.174	6.82788	0.0048443	0	-3.91086	1	1
Solyc01g105800	SL3.0ch01	93731765	93733765	+	651	832	629	622	43.898	50.28	6.38227	0.00385541	1.57003	-2.93078	0.458433	1
Solyc01g105810	SL3.0ch01	93741586	93743586	+	596	502	564	385	54.281	59.431	5.15047	0.0467561	0.687223	-3.39128	0.76056	1
Solyc01g105840	SL3.0ch01	93768453	93770453	-	231	497	233	343	31.731	40.451	8.72062	0.00521081	0	-3.91086	1	1
Solyc01g105890	SL3.0ch01	93804816	93806816	+	131	373	189	383	25.992	33.042	7.04989	0.0340334	-1.13155	-0.79262	0.43082	1
Solyc01g105980	SL3.0ch01	93874862	93876862	-	974	832	870	618	53.931	58.468	4.5364	0.0250133	-0.0094721	4.66269	0.975709	1
Solyc01g105990	SL3.0ch01	93875898	93877898	+	453	712	488	554	38.884	46.833	7.94889	0.000930238	-0.198014	5.51013	0.502024	1
Solyc01g106000	SL3.0ch01	93889043	93891043	-	245	807	223	568	23.289	28.192	4.90319	0.0418782	-0.00915523	4.89703	0.975143	1
Solyc01g106010	SL3.0ch01	93891901	93893901	-	744	469	769	389	61.336	66.408	5.07207	0.0278107	-0.308496	4.74184	0.325517	1
Solyc01g106050	SL3.0ch01	93927865	93929865	-	1416	560	1298	427	71.66	75.246	3.58646	0.035213	0.459402	3.42141	0.405831	1
Solyc01g106170	SL3.0ch01	94006926	94008926	+	44	1068	82	865	3.957	8.659	4.70209	8.8079e-05	4.32395	-1.57341	0.00158648	0.149329
Solyc01g106190	SL3.0ch01	94033454	94035454	+	1616	362	1657	301	81.699	84.627	2.92849	0.0375866	0.353977	2.77239	0.355538	1
Solyc01g106200	SL3.0ch01	94055799	94057799	-	1448	545	1519	364	72.654	80.669	8.01485	6.07223e-08	1.02268	-0.629881	0.240903	1
Solyc01g106370	SL3.0ch01	94191881	94193881	+	148	647	154	460	18.616	25.081	6.46508	0.0127113	0.116306	3.84972	0.73433	1
Solyc01g106410	SL3.0ch01	94208911	94210911	-	331	551	374	445	37.528	45.665	8.1371	0.00295875	0	-3.91086	1	1
Solyc01g106420	SL3.0ch01	94209295	94211295	+	371	823	439	611	31.072	41.81	10.7375	1.76142e-06	-0.00522334	3.40985	0.991897	1
Solyc01g106430	SL3.0ch01	94225622	94227622	-	575	556	541	263	50.84	67.289	16.4486	1.11797e-11	-0.333054	6.43479	0.274937	1
Solyc01g106440	SL3.0ch01	94224919	94226919	+	575	759	538	341	43.103	61.206	18.1025	3.1382e-15	0.049058	4.15819	0.882142	1
Solyc01g106490	SL3.0ch01	94261304	94263304	-	167	738	223	587	18.453	27.531	9.07783	6.57656e-05	0	-3.91086	1	1
Solyc01g106540	SL3.0ch01	94277506	94279506	-	1162	447	1329	309	72.219	81.136	8.91676	3.33929e-08	-0.815755	-1.22973	0.557541	1
Solyc01g106590	SL3.0ch01	94304611	94306611	+	4	300	10	147	1.316	6.369	5.05364	0.0200514	0.109664	3.14228	0.765624	1
Solyc01g106600	SL3.0ch01	94310836	94312836	+	102	495	123	400	17.085	23.518	6.43274	0.0243682	0	1.64845	1	1
Solyc01g106610	SL3.0ch01	94315073	94317073	+	421	1305	444	1030	24.392	30.122	5.73046	0.00157471	0	-0.063969	1	1
Solyc01g106620	SL3.0ch01	94319268	94321268	+	279	764	296	594	26.75	33.258	6.50867	0.00715452	0	-3.91086	1	1
Solyc01g106630	SL3.0ch01	94324378	94326378	-	348	477	389	387	42.182	50.129	7.94705	0.00591863	0	-3.91086	1	1
Solyc01g106700	SL3.0ch01	94360606	94362606	+	702	866	696	633	44.77	52.37	7.59979	0.000299664	-0.297123	3.23712	0.635044	1
Solyc01g106740	SL3.0ch01	94384033	94386033	-	147	1033	176	894	12.458	16.449	3.99097	0.0225864	0.00029177	5.60451	1	1
Solyc01g106780	SL3.0ch01	94441839	94443839	+	136	183	174	130	42.633	57.237	14.6036	0.00150967	0.174202	5.32373	0.535509	1
Solyc01g106790	SL3.0ch01	94446849	94448849	+	8	349	19	288	2.241	6.189	3.94803	0.0401735	-0.700267	2.32366	0.141779	1
Solyc01g106950	SL3.0ch01	94530828	94532828	+	6	208	13	117	2.804	10	7.19626	0.0193867	1.68411	-2.15337	0.225744	1
Solyc01g106943	SL3.0ch01	94541499	94543499	+	268	583	485	488	31.492	49.846	18.3535	6.74052e-14	0.410703	1.07487	0.597533	1
Solyc01g106947	SL3.0ch01	94559487	94561487	-	397	779	412	476	33.759	46.396	12.6379	1.02912e-07	-0.553819	1.22419	0.318467	1
Solyc01g107040	SL3.0ch01	94606632	94608632	-	1910	393	1671	269	82.935	86.134	3.19872	0.0140002	0.374363	5.2891	0.172324	1
Solyc01g107050	SL3.0ch01	94610762	94612762	-	227	241	228	127	48.504	64.225	15.7211	6.18948e-05	2.52741	-3.75971	0.672758	1
Solyc01g107060	SL3.0ch01	94608536	94610536	+	298	255	276	77	53.888	78.187	24.2991	2.13104e-12	5.53866	-3.32271	0.0158294	0.605545
Solyc01g107120	SL3.0ch01	94634754	94636754	+	353	515	365	391	40.668	48.28	7.61222	0.00798747	1.50603	-1.1025	0.113636	1
Solyc01g107230	SL3.0ch01	94750277	94752277	+	105	347	260	289	23.23	47.359	24.1287	5.53908e-14	0	-3.91086	1	1
Solyc01g107330	SL3.0ch01	94793139	94795139	-	558	558	590	352	50	62.633	12.6327	1.28978e-07	-0.505141	4.99738	0.0903891	1
Solyc01g107340	SL3.0ch01	94794213	94796213	+	353	740	393	526	32.296	42.764	10.4674	1.31846e-05	-0.106797	1.00335	0.886615	1
Solyc01g107360	SL3.0ch01	94820029	94822029	+	43	948	63	854	4.339	6.87	2.53118	0.0401406	0.201768	5.10388	0.5758	1
Solyc01g107370	SL3.0ch01	94829520	94831520	+	33	570	32	292	5.473	9.877	4.40391	0.0371915	-3.70402	-3.12917	0.319524	1
Solyc01g107410	SL3.0ch01	94874064	94876064	+	689	759	692	599	47.583	53.602	6.01899	0.00631386	0.188313	5.19742	0.561592	1
Solyc01g107510	SL3.0ch01	94921183	94923183	+	775	804	627	521	49.082	54.617	5.53503	0.0144777	0.0508764	5.51147	0.870461	1
Solyc01g107700	SL3.0ch01	95048179	95050179	+	358	427	360	218	45.605	62.284	16.6786	1.77973e-08	0.0972608	6.38916	0.74281	1
Solyc01g107720	SL3.0ch01	95059929	95061929	+	877	408	893	337	68.249	72.602	4.3526	0.0434835	0	-3.91086	1	1
Solyc01g107810	SL3.0ch01	95124076	95126076	-	1125	312	1120	226	78.288	83.21	4.92141	0.00435574	-0.883258	0.165696	0.320981	1
Solyc01g107830	SL3.0ch01	95141744	95143744	-	652	645	685	545	50.27	55.691	5.4212	0.0196131	1.89818	7.7244	3.45129e-05	0.00863257
Solyc01g107850	SL3.0ch01	95141100	95143100	+	652	684	686	587	48.802	53.888	5.08606	0.0264272	1.32401	1.50753	0.0224229	0.704925
Solyc01g107853	SL3.0ch01	95141451	95143451	+	652	702	686	599	48.154	53.385	5.2316	0.0227087	1.69017	1.71349	0.0227666	0.712619
Solyc01g107857	SL3.0ch01	95141768	95143768	+	652	629	685	530	50.898	56.379	5.48086	0.0187258	2.32915	4.23231	2.85722e-05	0.00740559
Solyc01g107937	SL3.0ch01	95210600	95212600	+	632	728	774	564	46.471	57.848	11.3769	5.64357e-08	2.1734	-2.17169	0.159951	1
Solyc01g107940	SL3.0ch01	95210600	95212600	+	632	728	774	564	46.471	57.848	11.3769	5.64357e-08	0.114394	4.48921	0.682411	1
Solyc01g108030	SL3.0ch01	95301076	95303076	-	917	821	811	588	52.762	57.97	5.20818	0.012532	-0.541463	6.79739	0.107684	1
Solyc01g108210	SL3.0ch01	95462622	95464622	+	196	366	182	234	34.875	43.75	8.87456	0.0161714	-0.867945	1.91101	0.231359	1
Solyc01g108280	SL3.0ch01	95529891	95531891	-	927	363	827	183	71.86	81.881	10.0207	2.33245e-07	0.106715	6.21178	0.679912	1
Solyc01g108290	SL3.0ch01	95537215	95539215	+	403	170	424	113	70.332	78.957	8.62558	0.00467388	0.199831	4.62196	0.467038	1
Solyc01g108320	SL3.0ch01	95564503	95566503	+	507	508	398	204	49.951	66.113	16.1622	4.34817e-09	-1.1916	-2.80797	0.762648	1
Solyc01g108460	SL3.0ch01	95683554	95685554	-	188	489	220	384	27.77	36.424	8.65427	0.00391835	-1.91594	-3.72791	1	1
Solyc01g108520	SL3.0ch01	95718155	95720155	+	3129	2638	3342	2188	54.257	60.434	6.17702	7.39079e-10	-0.407832	-1.97483	0.744734	1
Solyc01g108550	SL3.0ch01	95726727	95728727	-	244	587	235	294	29.362	44.423	15.0612	2.80517e-07	1.73129	-2.65514	0.212065	1
Solyc01g108560	SL3.0ch01	95726083	95728083	+	244	530	232	212	31.525	52.252	20.7277	4.26919e-11	-0.437541	3.43466	0.464222	1
Solyc01g108610	SL3.0ch01	95760277	95762277	+	194	185	156	89	51.187	63.673	12.4861	0.00802777	-1.97495	-2.14715	0.206632	1
Solyc01g108620	SL3.0ch01	95765856	95767856	+	288	562	324	432	33.882	42.857	8.97479	0.00129144	-0.356543	4.73523	0.432551	1
Solyc01g108630	SL3.0ch01	95770953	95772953	+	5	476	25	542	1.04	4.409	3.36967	0.0047102	-1.3686	-0.402016	0.29407	1
Solyc01g108700	SL3.0ch01	95831158	95833158	+	202	578	249	470	25.897	34.631	8.734	0.00125474	-0.385156	-3.51972	1	1
Solyc01g108870	SL3.0ch01	95934861	95936861	-	873	154	872	94	85.005	90.269	5.26428	0.00188907	0	0.209418	1	1
Solyc01g108910	SL3.0ch01	95953706	95955706	-	1222	737	1468	393	62.379	78.882	16.5036	2.51381e-27	-0.938982	7.06279	0.0667372	1
Solyc01g109040	SL3.0ch01	96021434	96023434	+	17	379	88	398	4.293	18.107	13.8141	1.21357e-09	-0.99051	4.10634	0.163142	1
Solyc01g109120	SL3.0ch01	96069299	96071299	-	402	736	417	500	35.325	45.474	10.1492	3.12683e-05	0.103386	3.98079	0.906559	1
Solyc01g109180	SL3.0ch01	96137132	96139132	-	736	1366	785	1174	35.014	40.071	5.05719	0.00384787	-1.0032	0.422342	0.256308	1
Solyc01g109190	SL3.0ch01	96138544	96140544	+	962	790	1083	535	54.909	66.934	12.0258	2.39144e-11	-0.0210148	-0.190955	1	1
Solyc01g109210	SL3.0ch01	96139047	96141047	+	638	338	754	189	65.369	79.958	14.5887	1.73603e-11	0.126577	2.42728	0.770038	1
Solyc01g109200	SL3.0ch01	96145857	96147857	-	152	231	80	49	39.687	62.016	22.3288	0.000111277	0	-3.91086	1	1
Solyc01g109290	SL3.0ch01	96200939	96202939	-	620	644	685	563	49.051	54.888	5.83719	0.0116704	0.032038	3.67559	0.925236	1
Solyc01g109300	SL3.0ch01	96200783	96202783	+	620	686	685	579	47.473	54.193	6.71984	0.00298588	0.0339442	7.81107	0.934378	1
Solyc01g109310	SL3.0ch01	96209554	96211554	-	108	1150	137	1006	8.585	11.986	3.40095	0.0199353	-0.543457	2.86887	0.228945	1
Solyc01g109410	SL3.0ch01	96297439	96299439	-	5	313	23	173	1.572	11.735	10.1624	1.91638e-05	0.344855	7.4983	0.191396	1
Solyc01g109420	SL3.0ch01	96297439	96299439	-	5	313	23	173	1.572	11.735	10.1624	1.91638e-05	0.920755	-0.78595	0.236313	1
Solyc01g109510	SL3.0ch01	96350560	96352560	+	498	695	566	521	41.744	52.07	10.3264	8.42367e-06	0.396566	5.6688	0.178598	1
Solyc01g109520	SL3.0ch01	96367132	96369132	-	270	598	363	585	31.106	38.291	7.18515	0.0052504	0.292797	8.23434	0.261219	1
Solyc01g109560	SL3.0ch01	96390208	96392208	-	243	490	223	297	33.151	42.885	9.73318	0.00215328	0.257554	3.18898	0.482951	1
Solyc01g109580	SL3.0ch01	96403240	96405240	-	93	639	110	479	12.705	18.676	5.9708	0.01144	-0.600722	1.58284	0.440548	1
Solyc01g109640	SL3.0ch01	96439605	96441605	+	678	461	666	366	59.526	64.535	5.00898	0.0409413	-0.147843	3.20448	0.680123	1
Solyc01g109690	SL3.0ch01	96493893	96495893	-	36	594	49	381	5.714	11.395	5.68106	0.00460208	-2.99346	-2.89388	0.194036	1
Solyc01g109720	SL3.0ch01	96521952	96523952	-	844	690	935	519	55.02	64.305	9.28581	2.83633e-06	-0.328693	2.52874	0.695637	1
Solyc01g109920	SL3.0ch01	96672165	96674165	+	44	840	59	558	4.977	9.562	4.58502	0.00345649	-0.0485556	5.87219	0.917213	1
Solyc01g109990	SL3.0ch01	96719947	96721947	+	807	371	702	257	68.506	73.201	4.69531	0.0453667	0.318021	5.10568	0.280021	1
Solyc01g110140	SL3.0ch01	96833757	96835757	-	485	951	586	728	33.774	44.597	10.8223	9.88477e-08	-4.61782	-3.61882	0.244782	1
Solyc01g110145	SL3.0ch01	96833499	96835499	-	481	1021	548	770	32.024	41.578	9.55418	2.01587e-06	0	-3.91086	1	1
Solyc01g110255	SL3.0ch01	96898429	96900429	+	1080	756	857	502	58.824	63.061	4.23754	0.0385657	0	-3.91086	1	1
Solyc01g110300	SL3.0ch01	96947111	96949111	-	505	268	563	220	65.33	71.903	6.57305	0.0163245	0.0751804	5.9083	0.76831	1
Solyc01g110350	SL3.0ch01	96994621	96996621	+	2	221	10	185	0.897	5.128	4.23134	0.038023	0.0627298	2.74668	0.893965	1
Solyc01g110410	SL3.0ch01	97034991	97036991	-	631	820	696	694	43.487	50.072	6.58469	0.00215046	0.0516269	7.24343	0.848176	1
Solyc01g110490	SL3.0ch01	97096535	97098535	+	690	507	633	373	57.644	62.922	5.27835	0.0329113	0.0992167	5.17578	0.705179	1
Solyc01g110500	SL3.0ch01	97102098	97104098	+	4	160	14	114	2.439	10.938	8.49848	0.0165476	-1.80903	-3.05391	0.593247	1
Solyc01g110800	SL3.0ch01	97263108	97265108	-	2	70	4	6	2.778	40	37.2222	0.00595914	3.0381	-2.71147	0.225221	1
Solyc01g110860	SL3.0ch01	97287098	97289098	-	718	499	672	357	58.998	65.306	6.30859	0.00806232	0.23726	0.118096	0.761267	1
Solyc01g110910	SL3.0ch01	97311824	97313824	-	114	854	124	537	11.777	18.759	6.9826	0.000621165	1.51081	-0.270028	0.0449064	0.965853
Solyc01g110913	SL3.0ch01	97304789	97306789	+	19	448	23	124	4.069	15.646	11.5777	6.04323e-05	-0.317319	-1.2272	0.828862	1
Solyc01g110920	SL3.0ch01	97311377	97313377	+	164	1154	169	677	12.443	19.976	7.53326	2.74219e-05	-0.141955	3.02706	0.801478	1
Solyc01g110925	SL3.0ch01	97311904	97313904	+	114	854	124	537	11.777	18.759	6.9826	0.000621165	0.322617	-1.7108	0.777268	1
Solyc01g111080	SL3.0ch01	97379465	97381465	-	1046	1008	1239	797	50.925	60.855	9.92959	3.02023e-09	-0.143376	2.64519	0.812222	1
Solyc01g111050	SL3.0ch01	97363174	97365174	+	68	1316	48	571	4.913	7.754	2.84115	0.040812	0	-3.91086	1	1
Solyc01g111075	SL3.0ch01	97379463	97381463	-	1046	1008	1239	797	50.925	60.855	9.92959	3.02023e-09	0	-3.91086	1	1
Solyc01g111130	SL3.0ch01	97418621	97420621	-	505	257	507	114	66.273	81.643	15.3695	2.31203e-09	-0.137418	4.06801	0.723992	1
Solyc01g111140	SL3.0ch01	97418200	97420200	+	556	351	553	247	61.301	69.125	7.82401	0.00334071	0.0149325	4.92935	0.961537	1
Solyc01g111235	SL3.0ch01	97465377	97467377	+	324	575	275	371	36.04	42.57	6.52961	0.0260602	0.276926	-1.76415	0.901848	1
Solyc01g111410	SL3.0ch01	97579929	97581929	+	572	455	584	333	55.696	63.686	7.98973	0.00174837	-0.124986	4.59023	0.646094	1
Solyc01g111510	SL3.0ch01	97653258	97655258	-	376	290	408	233	56.456	63.651	7.19409	0.0226042	-0.245148	7.53774	0.433446	1
Solyc01g111620	SL3.0ch01	97756969	97758969	-	216	900	263	643	19.355	29.029	9.67386	4.40601e-06	0.450911	4.63306	0.186607	1
Solyc01g111680	SL3.0ch01	97791756	97793756	-	28	589	53	542	4.538	8.908	4.36948	0.00915558	0.131351	4.93483	0.658077	1
Solyc01g111720	SL3.0ch01	97815873	97817873	-	837	461	827	366	64.484	69.321	4.83722	0.028429	0.0914675	5.61522	0.741359	1
Solyc01g111730	SL3.0ch01	97828141	97830141	+	381	799	410	530	32.288	43.617	11.3289	1.11961e-06	0.452348	6.26463	0.0871505	1
Solyc01g111750	SL3.0ch01	97859185	97861185	-	1	178	12	254	0.559	4.511	3.95262	0.0440049	-0.285064	2.02476	0.554525	1
Solyc01g111760	SL3.0ch01	97851575	97853575	+	262	1381	274	987	15.946	21.729	5.78235	0.000447378	-0.0405348	7.20229	0.888841	1
Solyc01g111937	SL3.0ch01	98004525	98006525	-	270	991	223	499	21.412	30.886	9.47485	2.83946e-05	-0.217667	1.22274	0.716746	1
Solyc01g111940	SL3.0ch01	98008403	98010403	+	567	508	593	379	52.744	61.008	8.26404	0.000927413	0.0321298	6.00312	0.904259	1
Solyc01g111960	SL3.0ch01	98021365	98023365	-	0	80	3	29	0	9.375	9.375	0.0497518	2.58003	-3.30995	0.56794	1
Solyc01g112090	SL3.0ch01	98104677	98106677	+	228	494	221	253	31.579	46.624	15.0455	2.19766e-06	-0.152662	0.69044	0.830559	1
Solyc01g112210	SL3.0ch01	98179399	98181399	-	996	533	1103	449	65.141	71.07	5.92897	0.00201656	-0.0239188	4.7466	0.935732	1
Solyc01g112220	SL3.0ch01	98186238	98188238	-	554	625	568	501	46.989	53.134	6.1448	0.0130489	0.524814	4.29869	0.281521	1
Solyc01g112300	SL3.0ch01	98280459	98282459	+	118	663	122	483	15.109	20.165	5.05645	0.0371185	0.163999	2.7818	0.656499	1
Solyc01g112310	SL3.0ch01	98292229	98294229	+	302	130	890	43	69.907	95.391	25.4838	1.30397e-34	0.067201	2.46642	0.87691	1
Solyc01g112320	SL3.0ch01	98326133	98328133	-	1092	237	1054	161	82.167	86.749	4.58193	0.00576544	-0.0042987	5.10986	0.98999	1
Solyc01g112380	SL3.0ch01	98367044	98369044	+	1142	2412	851	1420	32.133	37.472	5.33967	0.000207494	-1.12593	-2.59494	0.30714	1
Solyc01g113450	SL3.0ch01	98414412	98416412	-	1575	437	1852	420	78.28	81.514	3.23377	0.0253717	0	-3.91086	1	1
Solyc02g044050	SL3.0ch02	145085	147085	+	1458	475	1270	281	75.427	81.883	6.45586	3.58032e-05	0.187959	-0.492504	0.89302	1
Solyc02g044000	SL3.0ch02	161798	163798	+	1165	188	1112	134	86.105	89.246	3.14063	0.0411957	1.4118	-0.233906	0.271984	1
Solyc02g043910	SL3.0ch02	877670	879670	+	405	122	603	96	76.85	86.266	9.416	0.000157082	0	-3.91086	1	1
Solyc02g055565	SL3.0ch02	2234518	2236518	+	951	281	977	121	77.192	88.98	11.7884	9.91692e-13	0.271959	3.64097	0.422605	1
Solyc02g055465	SL3.0ch02	2620634	2622634	+	174	192	372	109	47.541	77.339	29.7979	1.66051e-17	-1.30306	-0.690142	0.111464	1
Solyc02g049100	SL3.0ch02	3916552	3918552	-	183	105	674	126	63.542	84.25	20.7083	3.40727e-11	0	-3.91086	1	1
Solyc02g049103	SL3.0ch02	3956020	3958020	-	1332	361	1603	271	78.677	85.539	6.86205	1.19169e-06	0	-3.91086	1	1
Solyc02g050240	SL3.0ch02	4583715	4585715	+	175	106	85	16	62.278	84.158	21.8808	0.000230113	-0.196943	4.65562	0.528284	1
Solyc02g050247	SL3.0ch02	4744389	4746389	-	818	387	977	188	67.884	83.863	15.9788	3.39162e-18	0	-3.91086	1	1
Solyc02g050290	SL3.0ch02	4966375	4968375	-	481	538	590	352	47.203	62.633	15.4296	1.53179e-10	0	-3.91086	1	1
Solyc02g050300	SL3.0ch02	5014815	5016815	-	2081	407	1921	296	83.641	86.649	3.00715	0.0131901	0	-3.91086	1	1
Solyc02g005100	SL3.0ch02	6547681	6549681	-	1110	427	1036	309	72.219	77.026	4.80741	0.0105752	0.339195	3.09928	0.405106	1
Solyc02g005300	SL3.0ch02	8020435	8022435	+	635	542	680	466	53.951	59.337	5.3861	0.0257881	0	-3.91086	1	1
Solyc02g005310	SL3.0ch02	8052184	8054184	-	1295	266	1722	199	82.96	89.641	6.68117	1.43168e-07	-0.318276	1.94356	0.616527	1
Solyc02g005320	SL3.0ch02	8073689	8075689	-	420	400	409	275	51.22	59.795	8.57581	0.00418581	0.125845	2.09617	0.791593	1
Solyc02g005350	SL3.0ch02	8275249	8277249	-	1437	208	1414	129	87.356	91.64	4.28404	0.000500973	-0.0571538	6.4259	0.839641	1
Solyc02g005370	SL3.0ch02	8543082	8545082	-	646	226	644	141	74.083	82.038	7.95565	0.000640514	0	-3.91086	1	1
Solyc02g005390	SL3.0ch02	8597444	8599444	-	819	311	802	210	72.478	79.249	6.77114	0.00138988	0	-3.91086	1	1
Solyc02g005410	SL3.0ch02	8621839	8623839	-	923	305	797	203	75.163	79.7	4.53713	0.0296007	0	-3.91086	1	1
Solyc02g005420	SL3.0ch02	8623709	8625709	+	694	361	900	229	65.782	79.717	13.9346	7.13383e-12	0	-3.91086	1	1
Solyc02g005427	SL3.0ch02	8785741	8787741	+	258	299	289	206	46.32	58.384	12.0643	0.000563484	0	-3.91086	1	1
Solyc02g005510	SL3.0ch02	9452499	9454499	-	407	327	439	267	55.45	62.181	6.73171	0.0274204	-0.0737905	4.96667	0.803853	1
Solyc02g005513	SL3.0ch02	9550354	9552354	-	1347	258	863	117	83.925	88.061	4.13599	0.0127706	0	-3.91086	1	1
Solyc02g005530	SL3.0ch02	9550927	9552927	-	1703	346	1163	165	83.114	87.575	4.46159	0.0018687	-4.6166	-3.37398	0.0283747	0.794008
Solyc02g011710	SL3.0ch02	14130087	14132087	-	1062	2145	1136	1805	33.115	38.626	5.51126	5.36796e-05	0	-3.91086	1	1
Solyc02g011720	SL3.0ch02	14130882	14132882	-	959	2240	987	1852	29.978	34.766	4.78764	0.000467892	0	-3.91086	1	1
Solyc02g011725	SL3.0ch02	14130647	14132647	+	1160	2165	1236	1827	34.887	40.353	5.46538	5.37924e-05	0	-3.86962	1	1
Solyc02g011730	SL3.0ch02	14131359	14133359	+	1140	2285	1091	1908	33.285	36.379	3.09412	0.0271525	0	-3.91086	1	1
Solyc02g011740	SL3.0ch02	14134400	14136400	-	720	1507	814	1052	32.33	43.623	11.2922	3.77596e-12	0	-3.83298	1	1
Solyc02g011750	SL3.0ch02	14134724	14136724	-	856	714	931	568	54.522	62.108	7.58578	0.000149864	1.89999	-3.72213	1	1
Solyc02g011770	SL3.0ch02	14137047	14139047	-	766	371	901	337	67.37	72.779	5.4084	0.0130535	0	-3.91086	1	1
Solyc02g011780	SL3.0ch02	14137788	14139788	-	867	800	1009	695	52.01	59.214	7.20402	0.000182504	0	-3.91086	1	1
Solyc02g011790	SL3.0ch02	14138520	14140520	-	840	1191	834	836	41.359	49.94	8.58118	2.08964e-06	0	-3.91086	1	1
Solyc02g011800	SL3.0ch02	14140166	14142166	-	709	9174	720	6295	7.174	10.264	3.08979	4.1176e-11	3.15496	-3.76317	0.388894	1
Solyc02g011810	SL3.0ch02	14141055	14143055	-	1090	8931	1035	6240	10.877	14.227	3.34965	9.81169e-10	-2.15098	-3.60876	0.576562	1
Solyc02g011815	SL3.0ch02	14142273	14144273	-	1010	11747	915	8933	7.917	9.291	1.374	0.00130572	-1.81202	-2.99036	1	1
Solyc02g011820	SL3.0ch02	14143632	14145632	-	1126	11730	1054	8798	8.759	10.698	1.93978	9.69522e-06	0	-3.91086	1	1
Solyc02g011830	SL3.0ch02	14143887	14145887	-	1044	565	955	355	64.885	72.901	8.01574	3.36049e-05	0	-3.91086	1	1
Solyc02g011850	SL3.0ch02	14146490	14148490	-	857	402	853	309	68.07	73.408	5.33802	0.0135216	0	-3.91086	1	1
Solyc02g011860	SL3.0ch02	14146929	14148929	-	660	325	728	244	67.005	74.897	7.89204	0.000696457	0	-3.91086	1	1
Solyc02g011877	SL3.0ch02	14157093	14159093	+	303	708	414	518	29.97	44.421	14.4503	8.71557e-10	0	-3.91086	1	1
Solyc02g011910	SL3.0ch02	14160773	14162773	+	743	1301	674	787	36.35	46.133	9.78249	9.89931e-08	0	-3.91086	1	1
Solyc02g011940	SL3.0ch02	14175411	14177411	-	325	1008	411	677	24.381	37.776	13.3946	3.47523e-11	0	-3.91086	1	1
Solyc02g011950	SL3.0ch02	14175243	14177243	-	393	322	540	225	54.965	70.588	15.6232	9.30089e-09	0	-3.91086	1	1
Solyc02g011960	SL3.0ch02	14176237	14178237	-	722	6398	612	4583	10.14	11.781	1.64011	0.0128947	0	-3.91086	1	1
Solyc02g011970	SL3.0ch02	14176742	14178742	-	865	6459	842	4665	11.81	15.29	3.47915	1.65584e-07	0	-3.91086	1	1
Solyc02g011975	SL3.0ch02	14175175	14177175	+	409	327	563	228	55.571	71.176	15.6051	5.42709e-09	0	-3.91086	1	1
Solyc02g011980	SL3.0ch02	14175534	14177534	+	384	1365	441	899	21.955	32.91	10.955	2.56851e-10	-3.6358	-3.05074	0.169175	1
Solyc02g011985	SL3.0ch02	14175787	14177787	+	591	6369	607	4586	8.491	11.689	3.19743	1.01904e-07	1.90132	-3.87171	1	1
Solyc02g011990	SL3.0ch02	14181961	14183961	-	753	5190	804	3655	12.67	18.031	5.36058	1.37778e-12	3.5952	-3.61885	0.400472	1
Solyc02g012020	SL3.0ch02	14191350	14193350	-	407	814	471	678	33.333	40.992	7.65883	0.000702643	0	-3.91086	1	1
Solyc02g014030	SL3.0ch02	15288982	15290982	+	301	1135	543	535	20.961	50.371	29.4101	1.21481e-51	0.806375	2.70023	0.448206	1
Solyc02g014040	SL3.0ch02	15342533	15344533	-	156	115	225	52	57.565	81.227	23.6629	3.31057e-08	1.78674	-3.44171	1	1
Solyc02g014050	SL3.0ch02	15343556	15345556	-	535	88	592	65	85.875	90.107	4.23175	0.0469045	0	-3.91086	1	1
Solyc02g014073	SL3.0ch02	15374867	15376867	-	848	560	756	329	60.227	69.677	9.45015	9.52515e-06	0	-3.91086	1	1
Solyc02g014095	SL3.0ch02	15491869	15493869	-	740	367	766	88	66.847	89.696	22.8482	1.76808e-32	1.89302	-3.66134	1	1
Solyc02g014150	SL3.0ch02	15676471	15678471	+	711	420	916	227	62.865	80.14	17.2753	2.42381e-18	-0.415498	5.40183	0.172135	1
Solyc02g014270	SL3.0ch02	16147585	16149585	+	797	220	802	149	78.368	84.332	5.96453	0.00334481	0	-3.91086	1	1
Solyc02g014280	SL3.0ch02	16148012	16150012	+	914	264	1007	212	77.589	82.609	5.01956	0.00763347	0	-3.91086	1	1
Solyc02g014310	SL3.0ch02	16217902	16219902	-	1084	134	1032	82	88.998	92.639	3.64078	0.00911697	0.161125	8.31821	0.600568	1
Solyc02g014410	SL3.0ch02	16730190	16732190	+	712	164	653	87	81.279	88.243	6.9647	0.000624699	0	-3.91086	1	1
Solyc02g014560	SL3.0ch02	17658831	17660831	+	453	251	555	197	64.347	73.803	9.4566	0.000619434	0.594975	-2.01805	0.61636	1
Solyc02g014620	SL3.0ch02	18037723	18039723	+	456	144	336	72	76	82.353	6.35294	0.0444931	0	-3.91086	1	1
Solyc02g014690	SL3.0ch02	18157504	18159504	+	485	273	956	262	63.984	78.489	14.5052	8.19378e-11	-0.334805	-2.4932	0.895343	1
Solyc02g014700	SL3.0ch02	18414442	18416442	+	1702	339	1818	247	83.39	88.039	4.64825	0.000151726	0	-3.91086	1	1
Solyc02g014730	SL3.0ch02	18462682	18464682	-	529	624	578	415	45.88	58.207	12.3271	1.89058e-07	-2.47308	-1.6078	0.148915	1
Solyc02g014777	SL3.0ch02	19007003	19009003	+	375	403	511	271	48.201	65.345	17.1448	2.10739e-10	0	-3.91086	1	1
Solyc02g014780	SL3.0ch02	19010209	19012209	-	756	2650	907	1451	22.196	38.465	16.2687	2.57136e-38	0	-3.91086	1	1
Solyc02g014790	SL3.0ch02	19010734	19012734	-	579	1983	599	1094	22.6	35.381	12.7814	5.97886e-18	0	-3.91086	1	1
Solyc02g014800	SL3.0ch02	19011085	19013085	-	408	991	436	569	29.164	43.383	14.2194	1.99956e-11	0	-3.91086	1	1
Solyc02g020920	SL3.0ch02	20830488	20832488	+	79	333	66	178	19.175	27.049	7.87442	0.0463231	1.40043	-2.50563	0.375897	1
Solyc02g020940	SL3.0ch02	20863182	20865182	+	363	155	411	103	70.077	79.961	9.88387	0.00125357	-0.725338	4.84552	0.352554	1
Solyc02g021020	SL3.0ch02	21798284	21800284	-	1749	150	1492	88	92.101	94.43	2.32927	0.0201069	0.0655378	3.75717	0.842494	1
Solyc02g021170	SL3.0ch02	22318246	22320246	-	1106	245	808	135	81.865	85.684	3.8187	0.0401697	0	-3.91086	1	1
Solyc02g021180	SL3.0ch02	22365963	22367963	-	1007	211	760	109	82.677	87.457	4.78033	0.0103246	0	-3.91086	1	1
Solyc02g021210	SL3.0ch02	22685880	22687880	+	417	717	562	615	36.772	47.749	10.976	1.28673e-06	0.403883	-1.51568	0.802056	1
Solyc02g021270	SL3.0ch02	22893077	22895077	-	669	5367	484	3109	11.083	13.471	2.38714	0.00257523	0.285472	1.36076	0.614693	1
Solyc02g021273	SL3.0ch02	22886713	22888713	-	9	746	19	511	1.192	3.585	2.39285	0.0170884	0	-3.91086	1	1
Solyc02g021290	SL3.0ch02	22894112	22896112	-	738	2299	698	1390	24.3	33.429	9.12882	3.06662e-11	1.14029	-0.315193	0.355713	1
Solyc02g021330	SL3.0ch02	22974829	22976829	-	358	365	414	233	49.516	63.988	14.4717	1.02123e-06	-4.61555	-3.58185	0.236313	1
Solyc02g021362	SL3.0ch02	23059087	23061087	-	1190	243	1039	155	83.043	87.018	3.97586	0.0161429	0	-3.91086	1	1
Solyc02g021364	SL3.0ch02	23059524	23061524	-	992	198	883	125	83.361	87.599	4.23786	0.0164306	0	-3.91086	1	1
Solyc02g021366	SL3.0ch02	23060399	23062399	-	1133	188	1029	128	85.768	88.937	3.16855	0.0440885	0	-3.91086	1	1
Solyc02g021380	SL3.0ch02	23063691	23065691	+	787	400	1051	286	66.302	78.609	12.3072	1.03496e-10	0	-3.91086	1	1
Solyc02g021450	SL3.0ch02	23239759	23241759	+	299	646	410	467	31.64	46.75	15.1101	8.50907e-10	0	-3.91086	1	1
Solyc02g021475	SL3.0ch02	23364178	23366178	-	247	171	298	137	59.091	68.506	9.41484	0.0138821	0.591616	2.42439	0.263968	1
Solyc02g021560	SL3.0ch02	23685329	23687329	-	875	352	812	220	71.312	78.682	7.37003	0.00040355	0.0634958	6.41307	0.817658	1
Solyc02g021630	SL3.0ch02	23802646	23804646	+	1745	264	1562	149	86.859	91.292	4.43251	0.000121392	-1.761	-1.96348	0.269057	1
Solyc02g021655	SL3.0ch02	23969160	23971160	+	172	59	233	20	74.459	92.095	17.636	1.6463e-06	0	-3.91086	1	1
Solyc02g022850	SL3.0ch02	24694159	24696159	-	87	573	125	482	13.182	20.593	7.41126	0.00231498	0.663859	2.50337	0.452369	1
Solyc02g022890	SL3.0ch02	24859150	24861150	+	824	297	501	107	73.506	82.401	8.89552	0.000197551	3.77868	-0.0202057	0.00328893	0.243056
Solyc02g022934	SL3.0ch02	24958395	24960395	-	789	613	777	374	56.277	67.507	11.2298	9.6303e-08	0.0127812	0.774825	0.989346	1
Solyc02g023930	SL3.0ch02	25015051	25017051	+	12976	2349	9924	1463	84.672	87.152	2.47991	1.28978e-07	-0.659109	-2.26339	0.789097	1
Solyc02g023940	SL3.0ch02	25026697	25028697	-	1009	427	1080	188	70.265	85.174	14.9089	6.39572e-19	0	-3.91086	1	1
Solyc02g023980	SL3.0ch02	25149430	25151430	+	904	465	789	311	66.034	71.727	5.69367	0.00908506	-0.068813	4.35799	0.8158	1
Solyc02g026080	SL3.0ch02	25451345	25453345	-	458	162	464	108	73.871	81.119	7.24791	0.00989935	-4.16508	-3.68956	0.334232	1
Solyc02g026085	SL3.0ch02	25470073	25472073	-	3109	891	3184	721	77.725	81.536	3.81149	0.000187144	0	-3.91086	1	1
Solyc02g030105	SL3.0ch02	25605853	25607853	+	1162	590	1157	426	66.324	73.089	6.76487	0.000165097	0	-3.91086	1	1
Solyc02g030120	SL3.0ch02	25653155	25655155	-	105	493	803	302	17.559	72.67	55.1112	4.72714e-108	-0.593169	-1.90077	0.647211	1
Solyc02g030137	SL3.0ch02	25687601	25689601	-	106	1137	292	866	8.528	25.216	16.6881	7.62553e-27	2.70203	-3.79728	0.647602	1
Solyc02g030250	SL3.0ch02	25937797	25939797	-	940	44	696	14	95.528	98.028	2.49971	0.0186048	0.074068	6.21276	0.807697	1
Solyc02g030280	SL3.0ch02	25959902	25961902	-	1246	188	1106	88	86.89	92.63	5.74	1.36731e-05	0	-3.91086	1	1
Solyc02g030290	SL3.0ch02	25961246	25963246	-	299	136	321	50	68.736	86.523	17.7873	2.98624e-08	1.7882	-3.87428	1	1
Solyc02g030300	SL3.0ch02	25959826	25961826	+	1278	173	1119	88	88.077	92.709	4.63201	0.000377549	-0.0102963	6.161	0.973408	1
Solyc02g030310	SL3.0ch02	25983543	25985543	-	438	108	358	49	80.22	87.961	7.74091	0.00554959	0	-3.91086	1	1
Solyc02g030383	SL3.0ch02	26100696	26102696	+	63	500	64	229	11.19	21.843	10.653	0.000296565	1.20977	-2.42117	0.478392	1
Solyc02g030420	SL3.0ch02	26261170	26263170	-	413	52	454	22	88.817	95.378	6.56095	0.00120402	0	-3.91086	1	1
Solyc02g030430	SL3.0ch02	26324787	26326787	-	711	127	818	98	84.845	89.301	4.45644	0.0191377	0	-3.91086	1	1
Solyc02g030450	SL3.0ch02	26384201	26386201	-	716	228	620	102	75.847	85.873	10.0251	3.49541e-06	0.261712	5.10144	0.410959	1
Solyc02g030480	SL3.0ch02	26691476	26693476	+	615	325	592	168	65.426	77.895	12.4692	2.15015e-07	-1.35985	-1.62337	0.419926	1
Solyc02g030530	SL3.0ch02	26768235	26770235	+	583	200	623	99	74.457	86.288	11.8309	1.09617e-07	1.79712	-3.83785	1	1
Solyc02g030550	SL3.0ch02	26867196	26869196	-	429	200	407	135	68.203	75.092	6.88875	0.0260336	0	-3.91086	1	1
Solyc02g030605	SL3.0ch02	26978018	26980018	+	308	288	289	121	51.678	70.488	18.81	3.93139e-08	0	-3.91086	1	1
Solyc02g030635	SL3.0ch02	27079282	27081282	+	675	196	645	136	77.497	82.586	5.0893	0.0305174	0	-3.91086	1	1
Solyc02g031770	SL3.0ch02	27393678	27395678	+	64	389	83	262	14.128	24.058	9.92994	0.00203248	-0.260182	3.27003	0.507358	1
Solyc02g031790	SL3.0ch02	27475843	27477843	+	629	639	830	594	49.606	58.287	8.68084	5.473e-05	4.19665	-0.198362	0.0206464	0.681096
Solyc02g031860	SL3.0ch02	27579234	27581234	-	1494	247	1258	140	85.813	89.986	4.17294	0.00212429	0.649096	6.59509	0.158916	1
Solyc02g031930	SL3.0ch02	27666598	27668598	-	473	363	539	151	56.579	78.116	21.537	1.89756e-17	1.81481	-3.80181	1	1
Solyc02g032000	SL3.0ch02	27750554	27752554	+	413	92	464	64	81.782	87.879	6.09661	0.0201848	0	-3.91086	1	1
Solyc02g032030	SL3.0ch02	27794086	27796086	-	326	686	329	422	32.213	43.808	11.5948	7.65015e-06	-2.39316	-3.1083	0.338243	1
Solyc02g032060	SL3.0ch02	27918639	27920639	+	42	216	110	141	16.279	43.825	27.5456	1.74102e-10	0	-3.91086	1	1
Solyc02g032070	SL3.0ch02	27924165	27926165	+	600	221	737	119	73.082	86.098	13.0165	8.159e-10	1.90087	-3.68456	1	1
Solyc02g032080	SL3.0ch02	27925744	27927744	+	517	375	861	193	57.96	81.689	23.7292	1.41394e-28	-0.919551	-3.66338	1	1
Solyc02g032100	SL3.0ch02	27988458	27990458	+	6	683	31	606	0.871	4.867	3.99573	5.48176e-05	-1.05225	2.28803	0.0984078	1
Solyc02g032150	SL3.0ch02	28168157	28170157	+	323	309	412	289	51.108	58.773	7.66559	0.0174547	0	-3.91086	1	1
Solyc02g032155	SL3.0ch02	28173044	28175044	+	210	236	288	83	47.085	77.628	30.5428	9.03605e-18	0	-3.91086	1	1
Solyc02g032160	SL3.0ch02	28219593	28221593	+	206	283	246	159	42.127	60.741	18.614	4.33792e-07	0	-3.91086	1	1
Solyc02g032173	SL3.0ch02	28293282	28295282	+	647	205	838	143	75.939	85.423	9.48407	2.83726e-06	0	-3.91086	1	1
Solyc02g032190	SL3.0ch02	28474844	28476844	+	1922	297	1931	168	86.616	91.996	5.3806	1.53011e-07	0	-3.91086	1	1
Solyc02g032230	SL3.0ch02	28505594	28507594	-	257	125	569	104	67.277	84.547	17.2693	2.52354e-09	0	-3.59162	1	1
Solyc02g032240	SL3.0ch02	28527536	28529536	-	1200	247	1209	176	82.93	87.292	4.36222	0.00498521	0	-3.91086	1	1
Solyc02g032260	SL3.0ch02	28542741	28544741	+	795	104	828	68	88.432	92.411	3.97912	0.0152092	0	-3.91086	1	1
Solyc02g032330	SL3.0ch02	28696739	28698739	+	972	2096	1070	1678	31.682	38.937	7.25553	1.09617e-07	0.162772	5.02073	0.570611	1
Solyc02g032335	SL3.0ch02	28740786	28742786	+	1087	175	901	101	86.133	89.92	3.78704	0.0192804	0	-3.91086	1	1
Solyc02g032340	SL3.0ch02	28757662	28759662	-	236	285	267	229	45.298	53.831	8.53314	0.0202246	0	-3.91086	1	1
Solyc02g032400	SL3.0ch02	28900567	28902567	-	964	344	1086	255	73.7	80.984	7.28403	6.23418e-05	1.23473	0.6385	0.0851778	1
Solyc02g032490	SL3.0ch02	28997782	28999782	-	679	348	669	229	66.115	74.499	8.38399	0.000396159	0.587118	0.0727687	0.582165	1
Solyc02g032520	SL3.0ch02	29034524	29036524	-	706	192	785	153	78.619	83.689	5.06955	0.017789	0	-3.83504	1	1
Solyc02g032550	SL3.0ch02	29135179	29137179	-	227	256	273	133	46.998	67.241	20.2434	2.28823e-08	0	-3.91086	1	1
Solyc02g032565	SL3.0ch02	29192324	29194324	-	285	474	585	259	37.549	69.313	31.7634	1.62089e-35	0	-3.91086	1	1
Solyc02g032590	SL3.0ch02	29272837	29274837	-	251	201	515	209	55.531	71.133	15.6016	7.38433e-07	0	-3.91086	1	1
Solyc02g032630	SL3.0ch02	29361576	29363576	+	519	94	358	31	84.666	92.031	7.36527	0.00250266	0	-3.91086	1	1
Solyc02g032650	SL3.0ch02	29382218	29384218	+	413	956	463	847	30.168	35.344	5.17551	0.0141401	1.95891	1.55506	0.0248837	0.749192
Solyc02g032670	SL3.0ch02	29441374	29443374	-	581	245	624	199	70.339	75.82	5.48119	0.032332	0	-3.91086	1	1
Solyc02g032770	SL3.0ch02	29634904	29636904	-	890	241	843	168	78.691	83.383	4.69137	0.0177113	0	-3.91086	1	1
Solyc02g032873	SL3.0ch02	29923414	29925414	+	744	324	517	171	69.663	75.145	5.48243	0.0362042	0	-3.91086	1	1
Solyc02g032920	SL3.0ch02	29941394	29943394	+	481	633	406	417	43.178	49.332	6.15398	0.0213756	0.00403906	5.19183	0.990017	1
Solyc02g032980	SL3.0ch02	30061475	30063475	-	661	205	591	133	76.328	81.63	5.30189	0.0303696	0	-3.91086	1	1
Solyc02g033020	SL3.0ch02	30102326	30104326	+	957	401	903	230	70.471	79.7	9.22863	1.48273e-06	0	-3.91086	1	1
Solyc02g033075	SL3.0ch02	30213048	30215048	+	9	115	29	142	7.258	16.959	9.701	0.0355572	0	-3.91086	1	1
Solyc02g033080	SL3.0ch02	30218379	30220379	-	326	218	432	151	59.926	74.099	14.173	5.02014e-06	0	-3.91086	1	1
Solyc02g036130	SL3.0ch02	30544235	30546235	-	229	78	245	42	74.593	85.366	10.773	0.00433284	0	-3.91086	1	1
Solyc02g036170	SL3.0ch02	30675635	30677635	-	250	117	244	56	68.12	81.333	13.2134	0.000701442	0	-3.91086	1	1
Solyc02g036190	SL3.0ch02	30703457	30705457	+	290	161	373	101	64.302	78.692	14.3904	1.25606e-05	0	-3.91086	1	1
Solyc02g036320	SL3.0ch02	30977045	30979045	+	2627	222	2288	145	92.208	94.04	1.83249	0.0251596	0.787783	-3.11289	1	1
Solyc02g036330	SL3.0ch02	31001695	31003695	-	758	169	727	114	81.769	86.445	4.67556	0.0219629	-0.0326826	5.60373	0.900363	1
Solyc02g036430	SL3.0ch02	31237984	31239984	+	577	285	424	153	66.937	73.484	6.54618	0.023804	-0.309009	-2.57263	0.877195	1
Solyc02g036450	SL3.0ch02	31273565	31275565	-	845	108	822	62	88.667	92.986	4.31906	0.00605652	0.181894	5.34245	0.518528	1
Solyc02g036460	SL3.0ch02	31281288	31283288	+	1102	569	1040	368	65.949	73.864	7.9151	1.75398e-05	3.24604	-3.72007	0.381654	1
Solyc02g037490	SL3.0ch02	31389407	31391407	-	833	817	803	664	50.485	54.738	4.25271	0.0425206	-5.02134	-2.35892	0.00281883	0.221591
Solyc02g037495	SL3.0ch02	31441230	31443230	+	288	525	314	361	35.424	46.519	11.0942	0.00012169	0.657731	8.44593	0.181617	1
Solyc02g037530	SL3.0ch02	31523939	31525939	+	592	654	592	406	47.512	59.319	11.8066	4.00561e-07	-0.476027	4.50303	0.195014	1
Solyc02g038670	SL3.0ch02	31748955	31750955	+	352	729	418	523	32.562	44.421	11.8584	5.80056e-07	-1.59877	-3.39315	0.314921	1
Solyc02g038690	SL3.0ch02	31799117	31801117	-	554	309	577	225	64.195	71.945	7.75047	0.00326355	-0.139109	0.63041	0.844337	1
Solyc00g308530	SL3.0ch02	32315094	32317094	+	2564	846	2300	540	75.191	80.986	5.7953	4.68898e-07	0	-3.91086	1	1
Solyc00g007300	SL3.0ch02	32452508	32454508	+	187	996	191	743	15.807	20.45	4.64241	0.0180683	0.199557	5.79624	0.601033	1
Solyc00g007260	SL3.0ch02	32496785	32498785	-	435	636	509	565	40.616	47.393	6.77668	0.00641146	-0.0140196	3.33517	0.972153	1
Solyc00g007195	SL3.0ch02	32600972	32602972	+	34	253	37	108	11.847	25.517	13.6706	0.00234112	1.23489	-0.402531	0.11295	1
Solyc00g007110	SL3.0ch02	32678253	32680253	-	699	287	816	203	70.892	80.079	9.18601	1.54817e-05	1.10147	1.15981	0.17502	1
Solyc00g007100	SL3.0ch02	32676801	32678801	+	809	474	1100	397	63.055	73.48	10.425	6.53782e-08	0.124789	4.84194	0.70032	1
Solyc00g007070	SL3.0ch02	32697141	32699141	+	92	459	165	451	16.697	26.786	10.0888	0.00024738	-0.0156983	6.37723	0.953285	1
Solyc00g007040	SL3.0ch02	32748020	32750020	+	474	115	345	50	80.475	87.342	6.86639	0.016072	-4.78229	-3.58612	0.225753	1
Solyc00g007030	SL3.0ch02	32763965	32765965	+	203	77	319	62	72.5	83.727	11.227	0.00297726	-1.50068	-3.3751	0.630562	1
Solyc02g060580	SL3.0ch02	33584741	33586741	-	566	399	631	341	58.653	64.918	6.26485	0.0154825	-1.93933	-3.87098	1	1
Solyc02g061680	SL3.0ch02	33752156	33754156	-	269	188	298	104	58.862	74.129	15.2672	2.25201e-05	0	-3.91086	1	1
Solyc02g061705	SL3.0ch02	33773735	33775735	-	1198	362	1310	254	76.795	83.76	6.96472	1.07778e-05	0	-3.91086	1	1
Solyc02g061710	SL3.0ch02	33776442	33778442	-	517	60	387	15	89.601	96.269	6.66727	0.000461916	0	-3.91086	1	1
Solyc02g061720	SL3.0ch02	33791675	33793675	-	363	369	383	207	49.59	64.915	15.3251	3.09511e-07	0	-3.91086	1	1
Solyc02g061820	SL3.0ch02	33893258	33895258	-	0	14	32	11	0	74.419	74.4186	5.84784e-06	-0.237676	4.59001	0.431809	1
Solyc02g061960	SL3.0ch02	34043637	34045637	+	377	758	389	589	33.216	39.775	6.55919	0.00732501	0.291504	7.32913	0.284146	1
Solyc02g062100	SL3.0ch02	34220454	34222454	-	410	557	585	649	42.399	47.407	5.00763	0.0463672	-0.155359	4.29582	0.777034	1
Solyc02g062150	SL3.0ch02	34260140	34262140	-	236	507	193	294	31.763	39.63	7.86727	0.0152566	0	-3.91086	1	1
Solyc02g062160	SL3.0ch02	34277995	34279995	-	591	541	604	404	52.208	59.921	7.71215	0.00168674	2.57097	-3.2984	0.580794	1
Solyc02g062180	SL3.0ch02	34289037	34291037	-	354	583	396	491	37.78	44.645	6.86472	0.0105992	-0.0203534	4.46322	0.947203	1
Solyc02g062170	SL3.0ch02	34281340	34283340	+	1173	270	1208	194	81.289	86.163	4.87364	0.00210472	0	-3.91086	1	1
Solyc02g062230	SL3.0ch02	34370356	34372356	-	550	578	598	451	48.759	57.007	8.24781	0.00072055	1.30303	-2.15481	0.311982	1
Solyc02g062260	SL3.0ch02	34410343	34412343	+	46	375	42	160	10.926	20.792	9.86571	0.00515604	0	-3.91086	1	1
Solyc02g062340	SL3.0ch02	34496137	34498137	-	645	345	525	218	65.152	70.659	5.50797	0.0412712	-1.61022	5.64693	0.0402345	0.92547
Solyc02g062510	SL3.0ch02	34749804	34751804	-	691	995	572	664	40.985	46.278	5.29374	0.0144143	0	-3.91086	1	1
Solyc02g062515	SL3.0ch02	34748489	34750489	+	700	498	577	290	58.431	66.551	8.12061	0.00104131	-1.42116	-1.18349	0.142743	1
Solyc02g062530	SL3.0ch02	34768103	34770103	-	1292	326	1284	198	79.852	86.64	6.78801	4.64527e-06	-0.261579	4.80444	0.428195	1
Solyc02g062630	SL3.0ch02	34922554	34924554	-	282	584	289	405	32.564	41.643	9.07914	0.0013129	0.890947	-0.974617	0.345237	1
Solyc02g062850	SL3.0ch02	35330690	35332690	-	678	146	737	115	82.282	86.502	4.22079	0.0435684	-1.04352	-3.28735	0.660482	1
Solyc02g062920	SL3.0ch02	35403711	35405711	+	165	424	351	471	28.014	42.701	14.6871	1.9992e-07	0.208542	6.44376	0.437428	1
Solyc02g062965	SL3.0ch02	35492932	35494932	+	1111	595	1123	421	65.123	72.733	7.61007	2.66979e-05	0	-3.91086	1	1
Solyc02g062970	SL3.0ch02	35501253	35503253	+	1312	147	1073	86	89.925	92.58	2.6552	0.0443435	0.125846	8.26495	0.650489	1
Solyc02g063020	SL3.0ch02	35586200	35588200	+	1332	765	1353	642	63.519	67.82	4.30024	0.01332	1.92892	0.293521	0.294597	1
Solyc02g063040	SL3.0ch02	35610320	35612320	+	509	362	536	229	58.439	70.065	11.6268	1.13071e-05	0.537108	2.7324	0.328974	1
Solyc02g063080	SL3.0ch02	35681846	35683846	-	77	2031	83	1176	3.653	6.593	2.93978	0.000816139	1.8976	-3.79399	1	1
Solyc02g063150	SL3.0ch02	35768438	35770438	+	382	1033	385	751	26.996	33.891	6.89438	0.000973613	-1.00736	6.13351	0.13213	1
Solyc02g063160	SL3.0ch02	35777363	35779363	+	850	1246	958	1017	40.553	48.506	7.95289	3.91339e-06	-0.163102	3.64337	0.642647	1
Solyc02g063170	SL3.0ch02	35784400	35786400	+	82	393	92	240	17.263	27.711	10.4477	0.00222272	-0.592265	0.607102	0.325588	1
Solyc02g063250	SL3.0ch02	35848080	35850080	+	117	234	146	167	33.333	46.645	13.312	0.00219615	0.879359	3.40635	0.115482	1
Solyc02g063255	SL3.0ch02	35854026	35856026	+	760	270	672	124	73.786	84.422	10.6357	4.30996e-07	0.0920465	-3.62975	1	1
Solyc02g063260	SL3.0ch02	35872033	35874033	-	1010	568	1102	462	64.005	70.46	6.45529	0.000683556	-0.446552	1.01716	0.485019	1
Solyc02g063280	SL3.0ch02	35897417	35899417	+	407	531	373	374	43.39	49.933	6.54287	0.022377	0.607644	4.54682	0.0505688	1
Solyc02g063410	SL3.0ch02	36042606	36044606	+	146	748	168	541	16.331	23.695	7.36425	0.00146264	0	-3.73048	1	1
Solyc02g063440	SL3.0ch02	36082640	36084640	+	192	440	240	396	30.38	37.736	7.3561	0.0188645	0.440409	2.15838	0.600908	1
Solyc02g063480	SL3.0ch02	36106717	36108717	+	635	850	480	470	42.761	50.526	7.76537	0.00106734	1.66528	1.0412	0.215024	1
Solyc02g063510	SL3.0ch02	36150788	36152788	+	6	294	156	464	2	25.161	23.1613	8.55144e-21	-1.41865	1.80662	0.0826673	1
Solyc02g064560	SL3.0ch02	36244607	36246607	-	103	456	154	440	18.426	25.926	7.50017	0.00823291	-4.16332	-3.39454	0.280589	1
Solyc02g064580	SL3.0ch02	36252151	36254151	+	561	897	673	830	38.477	44.777	6.29975	0.00237985	0.0568981	4.5649	0.841366	1
Solyc02g064590	SL3.0ch02	36263580	36265580	+	264	627	304	412	29.63	42.458	12.8285	1.28247e-06	0.381613	1.29181	0.461038	1
Solyc02g064595	SL3.0ch02	36275229	36277229	+	507	48	1262	75	91.351	94.39	3.03907	0.043272	-0.649314	-3.60083	1	1
Solyc02g064680	SL3.0ch02	36320658	36322658	+	404	595	457	462	40.44	49.728	9.28752	0.000324668	0.00303562	8.12406	0.99653	1
Solyc02g064710	SL3.0ch02	36389624	36391624	+	423	958	519	957	30.63	35.163	4.53262	0.0287902	-0.796757	0.321604	0.355564	1
Solyc02g064930	SL3.0ch02	36594290	36596290	+	211	496	211	323	29.844	39.513	9.6687	0.00204908	0	-3.91086	1	1
Solyc02g065010	SL3.0ch02	36696445	36698445	+	155	410	170	204	27.434	45.455	18.0209	2.51521e-07	-0.4282	0.792902	0.489503	1
Solyc02g065090	SL3.0ch02	36824038	36826038	+	147	1040	138	415	12.384	24.955	12.5706	3.03018e-09	0	-3.60824	1	1
Solyc02g065180	SL3.0ch02	36905700	36907700	+	545	700	533	494	43.775	51.899	8.12363	0.00067846	-0.0294775	4.42686	0.921293	1
Solyc02g065210	SL3.0ch02	36954260	36956260	-	510	189	451	117	72.961	79.401	6.44004	0.0232043	0	-3.91086	1	1
Solyc02g065380	SL3.0ch02	37136466	37138466	-	218	837	213	600	20.664	26.199	5.53575	0.016904	-0.229905	6.22452	0.497997	1
Solyc02g065390	SL3.0ch02	37135876	37137876	+	225	960	213	617	18.987	25.663	6.67531	0.00202962	-0.552883	-0.728153	0.575898	1
Solyc02g065480	SL3.0ch02	37195506	37197506	-	687	691	729	608	49.855	54.525	4.67019	0.0382126	0.0192706	-2.3595	1	1
Solyc02g065570	SL3.0ch02	37297464	37299464	+	220	316	228	223	41.045	50.554	9.50955	0.010579	-0.0767961	5.31142	0.934806	1
Solyc02g065580	SL3.0ch02	37313582	37315582	-	576	316	691	185	64.574	78.881	14.3073	5.29341e-10	0.0779107	5.32969	0.812474	1
Solyc02g065620	SL3.0ch02	37356131	37358131	-	386	431	298	241	47.246	55.288	8.04155	0.01268	0.17203	3.82459	0.582919	1
Solyc02g065670	SL3.0ch02	37404315	37406315	-	455	463	439	354	49.564	55.359	5.79512	0.0419084	-0.109826	-2.68245	1	1
Solyc02g065675	SL3.0ch02	37405180	37407180	-	892	498	922	419	64.173	68.755	4.582	0.0312402	0	-3.91086	1	1
Solyc02g065760	SL3.0ch02	37476530	37478530	+	430	160	592	140	72.881	80.874	7.99296	0.00263512	0	-3.73155	1	1
Solyc02g066840	SL3.0ch02	37626231	37628231	+	734	273	743	213	72.89	77.72	4.82989	0.0351645	0	-3.91086	1	1
Solyc02g066860	SL3.0ch02	37638233	37640233	+	71	161	153	110	30.603	58.175	27.5715	1.17114e-08	0	-3.91086	1	1
Solyc02g066880	SL3.0ch02	37654610	37656610	+	608	183	647	116	76.865	84.797	7.93213	0.000485815	0	-3.91086	1	1
Solyc02g066890	SL3.0ch02	37665396	37667396	+	901	222	997	170	80.232	85.433	5.20121	0.00423693	0	-3.91086	1	1
Solyc02g066930	SL3.0ch02	37749371	37751371	+	156	488	233	467	24.224	33.286	9.06211	0.00147165	-1.35318	-2.59279	0.714049	1
Solyc02g066940	SL3.0ch02	37762236	37764236	-	514	184	432	96	73.639	81.818	8.17921	0.00320826	0.319266	5.711	0.323448	1
Solyc02g067000	SL3.0ch02	37816737	37818737	-	1149	555	1106	332	67.43	76.912	9.4828	5.83174e-08	0.49944	-1.75553	0.754108	1
Solyc02g067005	SL3.0ch02	37816584	37818584	-	1151	591	1106	383	66.073	74.278	8.20456	4.72364e-06	0	-3.91086	1	1
Solyc02g067010	SL3.0ch02	37826297	37828297	-	845	512	698	275	62.27	71.737	9.46718	1.76828e-05	-0.692122	1.32445	0.321813	1
Solyc02g067020	SL3.0ch02	37826479	37828479	+	833	493	686	258	62.821	72.669	9.84898	7.84537e-06	0	-3.87049	1	1
Solyc02g067100	SL3.0ch02	37895326	37897326	+	237	222	295	164	51.634	64.27	12.6362	0.00074364	-0.115626	-0.45789	0.894479	1
Solyc02g067130	SL3.0ch02	37911633	37913633	+	500	323	367	116	60.753	75.983	15.2301	2.10043e-07	0	-3.52182	1	1
Solyc02g067230	SL3.0ch02	37984089	37986089	-	617	936	583	565	39.73	50.784	11.0544	1.84175e-07	0.854585	2.29509	0.0634567	1
Solyc02g067240	SL3.0ch02	37993155	37995155	+	112	946	456	970	10.586	31.978	21.3915	2.50887e-36	-4.31087	-3.57972	0.298701	1
Solyc10g077150	SL3.0ch02	37997209	37999209	+	620	316	669	258	66.239	72.168	5.92897	0.0174197	0	-3.91086	1	1
Solyc02g067285	SL3.0ch02	38032639	38034639	-	757	367	764	235	67.349	76.476	9.12772	2.98782e-05	0.321508	1.06146	0.616077	1
Solyc02g067290	SL3.0ch02	38032268	38034268	-	753	392	750	118	65.764	86.406	20.6413	3.06514e-25	0.374145	-1.52416	0.688341	1
Solyc02g067300	SL3.0ch02	38032658	38034658	-	757	367	764	235	67.349	76.476	9.12772	2.98782e-05	0	-3.91086	1	1
Solyc02g067320	SL3.0ch02	38095466	38097466	-	475	502	566	464	48.618	54.951	6.33324	0.0151338	-0.92864	1.06711	0.287985	1
Solyc02g067330	SL3.0ch02	38095466	38097466	-	475	502	566	464	48.618	54.951	6.33324	0.0151338	0	-3.91086	1	1
Solyc02g067410	SL3.0ch02	38167799	38169799	+	777	899	617	517	46.36	54.409	8.04879	0.000214469	0.260079	-0.971391	0.84256	1
Solyc02g067480	SL3.0ch02	38247543	38249543	-	327	574	206	223	36.293	48.019	11.7256	0.000362142	-0.791962	1.76761	0.141837	1
Solyc02g067570	SL3.0ch02	38287327	38289327	+	510	511	576	422	49.951	57.715	7.7644	0.00226594	0.205856	5.90194	0.489706	1
Solyc02g067600	SL3.0ch02	38310336	38312336	+	524	14827	469	10628	3.413	4.226	0.812909	0.00284112	1.14443	-0.948569	0.442451	1
Solyc02g067610	SL3.0ch02	38314482	38316482	+	465	653	436	462	41.592	48.552	6.96021	0.00688107	-0.130079	1.50276	0.870843	1
Solyc02g067730	SL3.0ch02	38416433	38418433	-	599	621	526	391	49.098	57.361	8.2626	0.000888227	0	-3.91086	1	1
Solyc02g067960	SL3.0ch02	38603894	38605894	-	147	446	138	293	24.789	32.019	7.22935	0.0294923	0.0690117	2.55621	0.862564	1
Solyc02g067970	SL3.0ch02	38607135	38609135	-	20	313	22	159	6.006	12.155	6.14869	0.0434123	-0.8501	-1.59387	0.593341	1
Solyc02g068000	SL3.0ch02	38631625	38633625	+	506	410	935	390	55.24	70.566	15.3259	3.41027e-12	0.8182	2.73981	0.0542663	1
Solyc02g068060	SL3.0ch02	38672727	38674727	+	192	749	271	694	20.404	28.083	7.67908	0.000550425	-1.67153	-0.446282	0.161634	1
Solyc02g068150	SL3.0ch02	38754312	38756312	+	372	1072	384	852	25.762	31.068	5.30619	0.00895798	0.117847	6.05281	0.719163	1
Solyc02g068170	SL3.0ch02	38764197	38766197	-	617	833	538	569	42.552	48.6	6.0481	0.00911697	0.574635	-3.13474	0.837231	1
Solyc02g068230	SL3.0ch02	38797082	38799082	-	42	874	85	681	4.585	11.097	6.51145	6.41048e-06	-0.0520799	5.23859	0.850256	1
Solyc02g068240	SL3.0ch02	38806046	38808046	-	1536	482	1537	376	76.115	80.345	4.23004	0.00521	-0.0219642	4.77657	0.941322	1
Solyc02g068270	SL3.0ch02	38819486	38821486	-	545	587	533	393	48.145	57.559	9.41452	0.000168112	-0.194756	3.50332	0.612266	1
Solyc02g068365	SL3.0ch02	38891046	38893046	-	498	771	544	558	39.243	49.365	10.1213	7.71381e-06	0.277629	2.58038	0.528653	1
Solyc02g068490	SL3.0ch02	39001166	39003166	-	236	309	590	253	43.303	69.988	26.6854	3.18969e-21	0.000734932	5.13509	0.999355	1
Solyc02g068640	SL3.0ch02	39160571	39162571	+	735	199	796	142	78.694	84.861	6.16762	0.00277052	-0.159945	5.71655	0.587821	1
Solyc02g068650	SL3.0ch02	39173820	39175820	-	955	237	748	129	80.117	85.291	5.17331	0.00848568	0.0575936	4.16827	0.860788	1
Solyc02g068700	SL3.0ch02	39205389	39207389	-	34	421	78	425	7.473	15.507	8.03443	0.000651243	-0.0583553	-3.76157	1	1
Solyc02g068710	SL3.0ch02	39198675	39200675	+	219	491	216	328	30.845	39.706	8.86081	0.00480627	0.146228	3.27802	0.718258	1
Solyc02g068730	SL3.0ch02	39238683	39240683	-	406	572	317	304	41.513	51.047	9.53341	0.00106829	0.190704	4.35417	0.544447	1
Solyc02g068850	SL3.0ch02	39321278	39323278	-	651	456	781	381	58.808	67.212	8.40412	0.000230088	5.45767	-2.73813	0.0247198	0.745512
Solyc02g068860	SL3.0ch02	39320311	39322311	+	682	422	866	406	61.775	68.082	6.3064	0.00538178	0	-3.91086	1	1
Solyc02g068900	SL3.0ch02	39343794	39345794	+	101	215	110	122	31.962	47.414	15.4518	0.00135298	0.383262	6.04203	0.154396	1
Solyc02g068903	SL3.0ch02	39352018	39354018	+	290	354	253	175	45.031	59.112	14.0811	5.48876e-05	0	-3.91086	1	1
Solyc02g068907	SL3.0ch02	39352471	39354471	+	190	309	178	147	38.076	54.769	16.6931	2.59644e-05	0	-3.91086	1	1
Solyc02g068910	SL3.0ch02	39359987	39361987	+	117	800	174	556	12.759	23.836	11.0766	8.84268e-08	-0.0106461	5.58813	0.969961	1
Solyc02g068990	SL3.0ch02	39515914	39517914	-	792	458	824	369	63.36	69.07	5.70957	0.0106014	0.00112361	3.6706	0.999854	1
Solyc02g068995	SL3.0ch02	39515855	39517855	-	792	521	822	439	60.32	65.186	4.86648	0.0302116	1.89779	-3.72574	1	1
Solyc02g069010	SL3.0ch02	39525978	39527978	+	485	549	570	523	46.905	52.15	5.24482	0.0411244	-0.410142	5.44436	0.168344	1
Solyc02g069040	SL3.0ch02	39550246	39552246	-	921	373	867	242	71.175	78.179	7.00389	0.00056189	0.719016	0.513673	0.343942	1
Solyc02g069150	SL3.0ch02	39662390	39664390	+	276	662	291	538	29.424	35.103	5.67823	0.0319296	0.297832	8.04815	0.287999	1
Solyc02g069160	SL3.0ch02	39669306	39671306	+	726	325	744	219	69.077	77.259	8.1815	0.000241615	0.118997	6.06423	0.663071	1
Solyc02g069180	SL3.0ch02	39701237	39703237	+	236	859	258	669	21.553	27.832	6.2792	0.00494986	1.27206	5.75329	0.00227532	0.190149
Solyc02g069210	SL3.0ch02	39731826	39733826	-	416	575	423	255	41.978	62.389	20.4116	8.35458e-15	3.59672	-3.76036	0.440648	1
Solyc02g069260	SL3.0ch02	39769948	39771948	+	232	767	299	713	23.223	29.545	6.32223	0.00546893	-0.158574	7.85272	0.687942	1
Solyc02g069290	SL3.0ch02	39796262	39798262	-	106	1216	122	952	8.018	11.359	3.34125	0.0185597	-0.60082	5.36066	0.154454	1
Solyc02g069280	SL3.0ch02	39785908	39787908	+	89	714	246	354	11.083	41	29.9166	1.14917e-36	1.50737	-2.95284	0.534367	1
Solyc02g069330	SL3.0ch02	39823185	39825185	-	101	1073	107	781	8.603	12.05	3.44648	0.0311171	-4.76969	-3.58662	0.11873	1
Solyc02g069390	SL3.0ch02	39870209	39872209	-	391	907	443	829	30.123	34.827	4.70378	0.0301963	1.20557	-2.81666	0.500892	1
Solyc02g069455	SL3.0ch02	39903794	39905794	+	294	273	297	202	51.852	59.519	7.66719	0.0342629	-0.178489	-1.50639	0.882583	1
Solyc02g069480	SL3.0ch02	39921926	39923926	-	155	363	216	324	29.923	40	10.0772	0.00279304	0	-3.91086	1	1
Solyc02g069560	SL3.0ch02	39979765	39981765	-	436	797	388	503	35.361	43.547	8.18567	0.000809536	-0.818955	-1.32587	0.561476	1
Solyc02g069720	SL3.0ch02	40104416	40106416	+	688	716	590	508	49.003	53.734	4.73121	0.0456655	0.016979	5.90234	0.952025	1
Solyc02g069810	SL3.0ch02	40212323	40214323	-	2	68	44	34	2.857	56.41	53.5531	2.20709e-12	0.137495	2.63556	0.814512	1
Solyc02g069900	SL3.0ch02	40258404	40260404	-	1289	407	1022	256	76.002	79.969	3.96634	0.0295492	0	-3.91086	1	1
Solyc02g069930	SL3.0ch02	40277332	40279332	-	531	679	564	560	43.884	50.178	6.29364	0.00858417	0	-3.91086	1	1
Solyc02g069940	SL3.0ch02	40289141	40291141	-	669	503	617	378	57.082	62.01	4.92814	0.0468627	0.512078	4.2821	0.183502	1
Solyc02g069965	SL3.0ch02	40324288	40326288	+	277	1149	308	870	19.425	26.146	6.72105	0.000306611	0.351102	1.16006	0.708986	1
Solyc02g069983	SL3.0ch02	40340418	40342418	-	883	360	803	259	71.038	75.612	4.57424	0.0357679	0.623163	-0.399246	0.389824	1
Solyc02g069987	SL3.0ch02	40339922	40341922	+	1206	562	1055	352	68.213	74.982	6.76956	0.000191626	0.493875	1.11256	0.366946	1
Solyc02g069990	SL3.0ch02	40360114	40362114	+	889	415	1022	381	68.175	72.844	4.66906	0.0222154	2.62984	-3.83616	0.586376	1
Solyc02g070060	SL3.0ch02	40470758	40472758	-	747	613	763	466	54.926	62.083	7.15652	0.0012246	-0.117344	-3.33336	1	1
Solyc02g070070	SL3.0ch02	40474351	40476351	-	618	639	617	519	49.165	54.313	5.1487	0.0322604	-0.119574	-1.14986	0.911901	1
Solyc02g070100	SL3.0ch02	40501301	40503301	+	626	283	680	217	68.867	75.808	6.94136	0.00441563	0.306603	5.68842	0.264633	1
Solyc02g070210	SL3.0ch02	40544762	40546762	-	422	903	386	661	31.849	36.867	5.01818	0.0300148	-0.927491	1.08871	0.462279	1
Solyc02g070215	SL3.0ch02	40545559	40547559	-	413	742	375	454	35.758	45.235	9.47765	0.000157415	0	-3.74361	1	1
Solyc02g070280	SL3.0ch02	40628208	40630208	-	1780	474	1703	377	78.971	81.875	2.90428	0.0422388	3.13265	2.11074	6.55554e-05	0.0139571
Solyc02g070410	SL3.0ch02	40703921	40705921	+	646	549	618	338	54.059	64.644	10.5858	7.65015e-06	2.87182	-2.88744	0.195214	1
Solyc02g070430	SL3.0ch02	40726767	40728767	-	818	853	854	728	48.953	53.982	5.02958	0.0141127	-0.285298	2.41541	0.858166	1
Solyc02g070490	SL3.0ch02	40793252	40795252	-	145	717	193	685	16.821	21.982	5.16043	0.0216681	-0.625964	0.871944	0.214823	1
Solyc02g070487	SL3.0ch02	40794850	40796850	-	100	663	153	619	13.106	19.819	6.71249	0.0020325	-0.128607	-1.83012	1	1
Solyc02g070530	SL3.0ch02	40832408	40834408	-	763	712	625	473	51.729	56.922	5.19286	0.0256155	0.817116	0.207504	0.454526	1
Solyc02g070710	SL3.0ch02	40935109	40937109	-	6	380	15	256	1.554	5.535	3.98065	0.0177164	-0.0151556	0.977645	0.983954	1
Solyc02g070720	SL3.0ch02	40933868	40935868	+	4	470	17	295	0.844	5.449	4.60484	0.000739459	1.82764	-3.06169	1	1
Solyc02g070770	SL3.0ch02	40953974	40955974	-	186	222	136	76	45.588	64.151	18.5627	0.000105899	-0.285991	5.58159	0.34587	1
Solyc02g070790	SL3.0ch02	40968061	40970061	-	431	432	485	354	49.942	57.807	7.86485	0.0051381	-0.580995	2.57236	0.301054	1
Solyc02g070850	SL3.0ch02	41001625	41003625	+	1896	433	1588	277	81.408	85.147	3.73912	0.00541905	0.236254	0.311273	0.690259	1
Solyc02g070915	SL3.0ch02	41069453	41071453	-	82	696	132	708	10.54	15.714	5.17444	0.00887511	0	-3.91086	1	1
Solyc02g070940	SL3.0ch02	41068955	41070955	+	82	686	132	708	10.677	15.714	5.0372	0.010816	-2.88606	4.26419	1.96994e-05	0.00537869
Solyc02g071110	SL3.0ch02	41163057	41165057	-	1258	729	1115	494	63.312	69.298	5.98618	0.000924452	0.173582	5.03912	0.675949	1
Solyc02g071120	SL3.0ch02	41163516	41165516	+	849	605	765	422	58.391	64.448	6.05754	0.00578192	-0.366996	5.84228	0.234419	1
Solyc02g071145	SL3.0ch02	41215181	41217181	-	832	476	843	315	63.609	72.798	9.18936	9.83085e-06	0	-3.91086	1	1
Solyc02g071150	SL3.0ch02	41215627	41217627	-	494	402	519	267	55.134	66.031	10.8966	4.43507e-05	0	-3.91086	1	1
Solyc02g071160	SL3.0ch02	41219245	41221245	+	604	346	690	278	63.579	71.281	7.70204	0.00176577	-0.0744831	4.41702	0.819021	1
Solyc02g071180	SL3.0ch02	41238804	41240804	-	482	573	481	461	45.687	51.062	5.37437	0.0419084	-0.0387462	6.23448	0.89115	1
Solyc02g071220	SL3.0ch02	41261898	41263898	-	669	535	646	412	55.565	61.059	5.49382	0.0251676	0.220539	4.5539	0.668847	1
Solyc02g071490	SL3.0ch02	41478605	41480605	-	2	306	9	219	0.649	3.947	3.29802	0.0293692	0.592124	3.18802	0.229927	1
Solyc02g071510	SL3.0ch02	41484446	41486446	-	213	1103	468	482	16.185	49.263	33.0777	4.15518e-62	-0.120011	5.73419	0.684212	1
Solyc02g071580	SL3.0ch02	41549001	41551001	-	683	696	777	629	49.529	55.263	5.73451	0.00937807	-0.179516	2.91743	0.692268	1
Solyc02g071597	SL3.0ch02	41573775	41575775	-	28	452	42	125	5.833	25.15	19.3164	2.31203e-09	0.376552	-2.8518	0.903215	1
Solyc02g071600	SL3.0ch02	41572154	41574154	+	62	852	71	554	6.783	11.36	4.57663	0.0078769	0.347341	3.42117	0.319498	1
Solyc02g071630	SL3.0ch02	41586073	41588073	+	712	679	650	437	51.186	59.798	8.61141	0.000136261	0	-3.78221	1	1
Solyc02g071675	SL3.0ch02	41611080	41613080	+	11	685	33	604	1.58	5.181	3.60007	0.00151766	-0.224803	-0.921005	0.844131	1
Solyc02g071680	SL3.0ch02	41612221	41614221	+	6	344	29	370	1.714	7.268	5.55388	0.00174331	0.113633	-1.0527	0.924149	1
Solyc02g071690	SL3.0ch02	41622175	41624175	+	142	118	150	67	54.615	69.124	14.509	0.00516492	-3.92584	-3.59898	0.370951	1
Solyc02g071750	SL3.0ch02	41691952	41693952	-	483	599	365	292	44.64	55.556	10.916	7.98756e-05	-0.0332876	4.61015	0.913553	1
Solyc02g071790	SL3.0ch02	41709494	41711494	+	452	290	563	240	60.916	70.112	9.19564	0.000909192	3.3705	-3.77034	0.530598	1
Solyc02g071800	SL3.0ch02	41715708	41717708	+	754	88	570	36	89.549	94.059	4.51071	0.00813194	-1.20722	3.66934	0.0243496	0.738264
Solyc02g071830	SL3.0ch02	41771324	41773324	-	255	701	275	563	26.674	32.816	6.14259	0.0156353	0.173877	0.39038	0.831475	1
Solyc02g071840	SL3.0ch02	41773439	41775439	-	54	106	170	10	33.75	94.444	60.6944	5.9663e-33	0	-3.91086	1	1
Solyc02g071875	SL3.0ch02	41798595	41800595	-	316	284	338	162	52.667	67.6	14.9333	5.68332e-06	-0.363255	-0.136328	0.669091	1
Solyc02g071970	SL3.0ch02	41868861	41870861	+	56	407	96	440	12.095	17.91	5.81542	0.0337163	2.4727	0.735835	0.138393	1
Solyc02g072040	SL3.0ch02	41900503	41902503	+	398	450	412	361	46.934	53.299	6.36487	0.0296615	-0.791681	-1.15031	0.550854	1
Solyc02g072060	SL3.0ch02	41908514	41910514	+	307	603	292	403	33.736	42.014	8.27812	0.00307055	0	-3.91086	1	1
Solyc02g072100	SL3.0ch02	41958002	41960002	-	586	847	552	633	40.893	46.582	5.68905	0.0124347	-0.169536	2.56993	0.746271	1
Solyc02g072160	SL3.0ch02	42038192	42040192	+	330	317	288	204	51.005	58.537	7.53195	0.0308225	-0.867931	4.91114	0.00596887	0.353468
Solyc02g072180	SL3.0ch02	42062604	42064604	+	116	613	106	383	15.912	21.677	5.76468	0.0320863	-0.299254	3.32634	0.532852	1
Solyc02g072340	SL3.0ch02	42173195	42175195	-	255	311	220	185	45.053	54.321	9.26798	0.0156897	0	-2.18759	1	1
Solyc02g072397	SL3.0ch02	42193781	42195781	-	1090	587	1111	448	64.997	71.264	6.26661	0.000760352	0.577604	1.18056	0.23468	1
Solyc02g072410	SL3.0ch02	42192396	42194396	-	194	846	200	550	18.654	26.667	8.01282	0.000391929	-3.05854	-3.69481	0.420667	1
Solyc02g072443	SL3.0ch02	42207813	42209813	-	415	1001	436	709	29.308	38.079	8.77069	2.88795e-05	4.73707	-3.28582	0.104394	1
Solyc02g072447	SL3.0ch02	42217805	42219805	+	1039	944	1031	790	52.395	56.617	4.22188	0.0251536	0.873984	2.21931	0.121572	1
[truncated: 6,235 more rows]

## Sheet: PHYA_vs_WT_BK_hypomethylated
Supplementary Table 15. Total differentially methylated promoters (DMPs) in CHG context
[truncated: 4,681 more rows]

[truncated: 5 more sheets: PHYA_vs_WT_BK_hypermethylated, PHYB1B2_vs_WT_IG_hypomethylated, PHYB1B2_vs_WT_IG_hypermethylate, PHYB1B2_vs_WT_BK_hypomethylated, PHYB1B2_vs_WT_BK_hypermethylate]
