# Supplementary material for: Phytochrome-Mediated Light Perception Affects Fruit Development and Ripening Through Epigenetic Mechanisms
Source: Front Plant Sci. 2022 Apr 28;13:870974. doi: 10.3389/fpls.2022.870974 (PMC9096621; doi:10.3389/fpls.2022.870974)
Supplement: Supplementary file 13 [file Data_Sheet_13.XLSX]

## Sheet: PHYA_vs_WT_IG_hypomethylated
Supplementary Table 16. Total differentially methylated promoters (DMPs) in CHH context
ID	chr	from	to	strand	met_WT	unmet_WT	met_PHYA	unmet_PHYA	X.met_WT	X.met_PHYA	X.diff_PHYA.ctrl	FDR_diff_PHYA.WT	logFC_PHYA	logCPM_PHYA	PValue_PHYA	padj_PHYA
Solyc00g005287	SL3.0ch00	2357974	2359974	-	884	7715	604	5992	10.28	9.157	-1.1232	0.0116474	4.34896	-3.3494	0.122502	1
Solyc00g005430	SL3.0ch00	2358571	2360571	-	628	6534	419	5097	8.769	7.596	-1.17242	0.00933832	4.45167	-3.65101	0.269915	1
Solyc00g006480	SL3.0ch00	4232311	4234311	+	164	2133	82	2042	7.14	3.861	-3.27911	1.81805e-06	0	-3.91086	1	1
Solyc00g006683	SL3.0ch00	5682337	5684337	-	53	58	413	663	47.748	38.383	-9.36485	0.0314202	0	-3.91086	1	1
Solyc00g006820	SL3.0ch00	5819900	5821900	+	3399	9295	2941	8463	26.776	25.789	-0.987233	0.0391262	-0.509874	1.61308	0.550245	1
Solyc00g006870	SL3.0ch00	6404880	6406880	+	1457	6015	1319	5988	19.499	18.051	-1.44828	0.012588	0	-3.91086	1	1
Solyc00g007970	SL3.0ch00	6941525	6943525	-	316	533	519	1064	37.22	32.786	-4.43441	0.0160143	0	-3.91086	1	1
Solyc00g014390	SL3.0ch00	10022073	10024073	+	199	1899	175	2002	9.485	8.039	-1.44664	0.0476985	0	-3.91086	1	1
Solyc00g020000	SL3.0ch00	10850676	10852676	+	2464	107374	1418	72768	2.243	1.911	-0.331892	1.01304e-06	2.62693	-3.50132	0.602031	1
Solyc00g026907	SL3.0ch00	11445381	11447381	-	275	4680	222	4506	5.55	4.695	-0.854518	0.0284403	0	-3.91086	1	1
Solyc00g028960	SL3.0ch00	11558082	11560082	-	1439	4043	1331	4122	26.25	24.409	-1.84096	0.0143199	0	-3.91086	1	1
Solyc00g029070	SL3.0ch00	11558045	11560045	+	1439	4055	1331	4122	26.192	24.409	-1.78363	0.0166971	0	-3.91086	1	1
Solyc00g029190	SL3.0ch00	11564413	11566413	+	640	1033	400	901	38.255	30.746	-7.50905	1.64189e-05	0	-3.91086	1	1
Solyc00g048510	SL3.0ch00	12614041	12616041	+	4994	13552	4459	13460	26.928	24.884	-2.04344	7.44113e-06	0.744273	2.93276	0.344178	1
Solyc00g057280	SL3.0ch00	13036904	13038904	-	499	5108	359	4545	8.9	7.321	-1.57904	0.00203971	0	-3.91086	1	1
Solyc00g058900	SL3.0ch00	13110917	13112917	-	52	640	16	333	7.514	4.585	-2.92992	0.0390729	0	-3.91086	1	1
Solyc00g066150	SL3.0ch00	13435324	13437324	-	3856	7794	3129	6939	33.099	31.079	-2.02005	0.000948849	0	-3.91086	1	1
Solyc00g094520	SL3.0ch00	14585676	14587676	-	2562	123191	1825	93015	2.037	1.924	-0.113034	0.0290201	1.80124	-2.96074	1	1
Solyc00g097260	SL3.0ch00	14687968	14689968	+	2105	10792	1871	10260	16.322	15.423	-0.898329	0.0256748	0	-3.67847	1	1
Solyc00g106650	SL3.0ch00	15030856	15032856	+	39	514	10	248	7.052	3.876	-3.17647	0.0388001	-2.76409	-3.29504	0.687283	1
Solyc00g112190	SL3.0ch00	15230377	15232377	-	1852	9583	1440	8049	16.196	15.175	-1.02042	0.0223296	1.78043	-3.55781	1	1
Solyc00g117450	SL3.0ch00	15410790	15412790	-	1740	7801	1524	7273	18.237	17.324	-0.912994	0.0495885	0	-3.91086	1	1
Solyc00g117653	SL3.0ch00	15444881	15446881	-	1255	56151	679	34140	2.186	1.95	-0.236098	0.00838693	2.65328	-3.83525	0.58676	1
Solyc00g118680	SL3.0ch00	15446465	15448465	-	1444	44444	696	27468	3.147	2.471	-0.675552	8.97802e-08	-1.71146	-3.2667	0.583103	1
Solyc00g118690	SL3.0ch00	15444367	15446367	+	1101	50554	603	30277	2.131	1.953	-0.178729	0.0379634	1.89869	-3.83472	1	1
Solyc00g121230	SL3.0ch00	15526756	15528756	-	1848	6819	1462	7082	21.322	17.111	-4.21083	4.20919e-12	0	-3.91086	1	1
Solyc00g125980	SL3.0ch00	15682094	15684094	+	1499	44503	916	29175	3.259	3.044	-0.214454	0.0455548	0	-3.91086	1	1
Solyc00g125990	SL3.0ch00	15682094	15684094	+	1499	44503	916	29175	3.259	3.044	-0.214454	0.0455548	-0.411468	-0.33344	0.679086	1
Solyc00g127545	SL3.0ch00	15727898	15729898	+	943	8765	730	8470	9.714	7.935	-1.77886	1.37337e-05	0	-3.91086	1	1
Solyc00g127670	SL3.0ch00	15736452	15738452	-	2730	13989	2272	13413	16.329	14.485	-1.84355	4.00704e-06	-0.274065	2.41383	0.512339	1
Solyc00g134820	SL3.0ch00	15965396	15967396	+	1233	5115	810	3934	19.423	17.074	-2.34924	0.00104749	0	-3.91086	1	1
Solyc00g134830	SL3.0ch00	15966197	15968197	+	503	2075	349	1996	19.511	14.883	-4.62852	1.62008e-05	0	-3.87283	1	1
Solyc00g171710	SL3.0ch00	17092060	17094060	+	3094	8932	2047	7534	25.728	21.365	-4.36239	1.3297e-13	0	-3.91086	1	1
Solyc00g180440	SL3.0ch00	17342216	17344216	-	718	1550	158	475	31.658	24.961	-6.69734	0.00078273	0	-3.62872	1	1
Solyc00g188857	SL3.0ch00	17772479	17774479	+	2310	8482	1887	7735	21.405	19.611	-1.79344	0.00100519	0.12744	4.88727	0.73215	1
Solyc00g215560	SL3.0ch00	18287741	18289741	+	146	282	174	455	34.112	27.663	-6.44919	0.0148484	-0.131888	-1.49405	0.95712	1
Solyc00g226760	SL3.0ch00	18575849	18577849	+	52	400	228	3016	11.504	7.028	-4.47606	0.00102269	-5.5876	-3.33246	0.0336963	0.859052
Solyc00g231780	SL3.0ch00	18703657	18705657	-	1489	2923	1062	2307	33.749	31.523	-2.22616	0.0191889	-1.50512	-1.6855	0.248227	1
Solyc00g233480	SL3.0ch00	18745469	18747469	-	1955	7862	1549	6939	19.914	18.249	-1.66514	0.00262149	1.18533	-0.735922	0.392564	1
Solyc00g254110	SL3.0ch00	19246090	19248090	+	46	38	254	443	54.762	36.442	-18.32	0.000848532	0	-3.91086	1	1
Solyc00g255510	SL3.0ch00	19283376	19285376	-	1113	6162	797	4865	15.299	14.076	-1.22267	0.0264416	0	-3.91086	1	1
Solyc00g277510	SL3.0ch00	19798998	19800998	-	1251	1922	927	1569	39.426	37.139	-2.28699	0.0388438	0.902746	0.867777	0.459186	1
Solyc01g005120	SL3.0ch01	107325	109325	-	895	7630	711	7845	10.499	8.31	-2.18858	1.0075e-06	-0.603943	3.07059	0.268827	1
Solyc01g005130	SL3.0ch01	122769	124769	+	228	2595	117	2541	8.077	4.402	-3.67471	2.4738e-08	-0.106701	4.23302	0.775325	1
Solyc01g005150	SL3.0ch01	134364	136364	-	884	6295	541	5455	12.314	9.023	-3.29101	1.72482e-09	-1.13579	-0.622394	0.140899	1
Solyc01g005190	SL3.0ch01	149494	151494	+	46	811	29	1253	5.368	2.262	-3.10547	0.000125824	-0.154148	-1.30319	0.935446	1
Solyc01g005200	SL3.0ch01	152262	154262	+	194	4803	90	3297	3.882	2.657	-1.22511	0.00154365	-2.26615	-3.05079	0.260619	1
Solyc01g005250	SL3.0ch01	195082	197082	-	2130	4963	1886	4688	30.03	28.689	-1.34083	0.0405846	-0.0460296	5.69157	0.870267	1
Solyc01g005270	SL3.0ch01	203236	205236	-	3220	5296	3012	5286	37.811	36.298	-1.51328	0.021118	0.294653	2.46412	0.571834	1
Solyc01g005370	SL3.0ch01	257883	259883	+	1862	7106	1462	6144	20.763	19.222	-1.54104	0.00767716	0.483299	4.67631	0.157894	1
Solyc01g005380	SL3.0ch01	259020	261020	+	1183	6551	899	5960	15.296	13.107	-2.18923	0.000118481	1.03402	-1.76595	0.377987	1
Solyc01g005385	SL3.0ch01	259135	261135	+	1167	6162	840	5520	15.923	13.208	-2.7155	6.32229e-06	0	-3.79823	1	1
Solyc01g005420	SL3.0ch01	294380	296380	-	2765	4688	2767	5128	37.099	35.047	-2.05166	0.00466051	-0.293219	3.03024	0.721859	1
Solyc01g005430	SL3.0ch01	296679	298679	+	178	3729	141	4087	4.556	3.335	-1.22102	0.00294079	0.114441	4.51549	0.785158	1
Solyc01g005440	SL3.0ch01	307089	309089	+	610	5349	394	4354	10.237	8.298	-1.93839	0.000441151	0.067013	7.13767	0.8502	1
Solyc01g005470	SL3.0ch01	324960	326960	-	1110	10707	877	9230	9.393	8.677	-0.716093	0.0314151	0.728377	2.29653	0.519617	1
Solyc01g005510	SL3.0ch01	348880	350880	-	2623	4592	2055	4467	36.355	31.509	-4.84608	2.75851e-09	4.4019	-3.29228	0.199436	1
Solyc01g005520	SL3.0ch01	348023	350023	+	2630	4797	1985	4208	35.411	32.052	-3.35902	2.90953e-05	-0.859494	4.449	0.0154269	0.597821
Solyc01g005560	SL3.0ch01	392352	394352	+	561	8723	421	7530	6.043	5.295	-0.747723	0.0176234	-0.519329	8.1311	0.0837507	1
Solyc01g005570	SL3.0ch01	403017	405017	-	914	3104	525	2459	22.748	17.594	-5.1538	1.25077e-07	-0.00887121	4.56945	0.978368	1
Solyc01g005630	SL3.0ch01	442810	444810	+	4783	10469	4206	10046	31.36	29.512	-1.84817	0.0003887	0	-3.91086	1	1
Solyc01g005640	SL3.0ch01	447851	449851	+	153	6246	66	4694	2.391	1.387	-1.00444	0.000101888	0.418122	5.15533	0.154045	1
Solyc01g005665	SL3.0ch01	459646	461646	+	2687	11490	1573	7747	18.953	16.878	-2.07555	3.9717e-05	-1.93692	-2.18294	0.205241	1
Solyc01g005720	SL3.0ch01	485249	487249	+	640	2885	482	2499	18.156	16.169	-1.98696	0.0176855	-0.275368	1.24495	0.708841	1
Solyc01g005730	SL3.0ch01	488688	490688	+	558	3029	390	2652	15.556	12.821	-2.73566	0.000968573	0.0106423	7.85887	0.983638	1
Solyc01g005770	SL3.0ch01	502223	504223	-	10	392	0	247	2.488	0	-2.48756	0.0086954	0	-3.65929	1	1
Solyc01g005930	SL3.0ch01	604105	606105	+	5939	7944	5072	7204	42.779	41.316	-1.46255	0.00914347	0.0346687	5.0411	0.909652	1
Solyc01g005960	SL3.0ch01	623152	625152	+	4157	8631	2077	4848	32.507	29.993	-2.51426	0.000202714	-0.00414021	5.87646	0.988405	1
Solyc01g005970	SL3.0ch01	640038	642038	+	1593	9753	1338	8835	14.04	13.152	-0.887728	0.0283169	0.179813	2.72944	0.654338	1
Solyc01g005990	SL3.0ch01	655153	657153	-	1860	6147	1397	5446	23.23	20.415	-2.81465	3.0017e-05	-0.0950155	1.02438	0.916571	1
Solyc01g006170	SL3.0ch01	811277	813277	-	2575	4674	2030	4155	35.522	32.821	-2.7008	0.000669395	0.727463	4.24442	0.0673227	1
Solyc01g006290	SL3.0ch01	882366	884366	+	2304	8695	1596	6853	20.947	18.89	-2.05755	0.000274799	0	2.82469	1	1
Solyc01g006350	SL3.0ch01	945512	947512	-	122	4745	88	4368	2.507	1.975	-0.531812	0.0432023	-0.0561441	6.3271	0.828375	1
Solyc01g006360	SL3.0ch01	981297	983297	-	534	6060	419	5926	8.098	6.604	-1.49465	0.000784697	0.351399	4.04951	0.597792	1
Solyc01g006390	SL3.0ch01	1018236	1020236	-	460	5073	308	4064	8.314	7.045	-1.26892	0.0100679	0	-2.19871	1	1
Solyc01g006520	SL3.0ch01	1097091	1099091	+	2881	7461	2392	6759	27.857	26.139	-1.71806	0.0041657	-0.269576	1.55837	0.723033	1
Solyc01g006545	SL3.0ch01	1126682	1128682	-	943	4289	846	4208	18.024	16.739	-1.28448	0.0400559	1.78816	-3.87428	1	1
Solyc01g006550	SL3.0ch01	1126731	1128731	-	956	4378	859	4345	17.923	16.507	-1.41623	0.0272335	0.850764	2.21463	0.25425	1
Solyc01g006760	SL3.0ch01	1350019	1352019	-	629	4035	501	3665	13.486	12.026	-1.46035	0.0204787	0	-3.91086	1	1
Solyc01g006770	SL3.0ch01	1348387	1350387	+	1392	10624	1109	9667	11.585	10.291	-1.29317	0.00113261	0	-3.91086	1	1
Solyc01g006820	SL3.0ch01	1391134	1393134	-	136	2651	96	3364	4.88	2.775	-2.10523	1.23619e-05	0.293821	0.0936743	0.725738	1
Solyc01g006900	SL3.0ch01	1477626	1479626	-	4240	8104	3912	7919	34.349	33.066	-1.283	0.0176236	0.335439	8.42115	0.296162	1
Solyc01g007260	SL3.0ch01	1823385	1825385	-	5325	8550	4811	8346	38.378	36.566	-1.81229	0.00134102	-0.408787	0.0845083	0.615356	1
Solyc01g007800	SL3.0ch01	1888876	1890876	+	2590	9119	2110	8278	22.12	20.312	-1.80784	0.00068057	2.35089	-3.65929	0.522426	1
Solyc01g007830	SL3.0ch01	1938784	1940784	-	1023	8892	931	8825	10.318	9.543	-0.774855	0.0332961	-0.117487	-2.44535	1	1
Solyc01g007880	SL3.0ch01	1991492	1993492	-	4181	8126	3945	8448	33.973	31.832	-2.14005	0.000243359	0.0458189	3.88532	0.90269	1
Solyc01g007890	SL3.0ch01	1998989	2000989	-	734	10817	441	8629	6.354	4.862	-1.49225	3.67186e-06	-0.0385082	0.617487	0.970394	1
Solyc01g007895	SL3.0ch01	2021766	2023766	-	869	7611	679	7197	10.248	8.621	-1.62651	0.000285996	-1.08112	-2.088	0.542971	1
Solyc01g008060	SL3.0ch01	2136396	2138396	+	6428	9050	5412	8812	41.53	38.048	-3.48154	1.24048e-09	0.0153735	5.47341	0.954545	1
Solyc01g008190	SL3.0ch01	2275298	2277298	+	4115	9020	3876	9085	31.329	29.905	-1.42341	0.0070709	0.181222	2.24454	0.704827	1
Solyc01g008700	SL3.0ch01	2685791	2687791	-	3634	8371	3400	8858	30.271	27.737	-2.53373	1.16378e-05	0.533562	6.063	0.192742	1
Solyc01g008880	SL3.0ch01	2835494	2837494	-	1866	11147	1499	10694	14.34	12.294	-2.04557	1.76364e-06	0	-3.50504	1	1
Solyc01g008940	SL3.0ch01	2890927	2892927	+	596	3684	389	3203	13.925	10.83	-3.09561	2.7467e-05	-5.26675	-2.67371	0.000290427	0.0422275
Solyc01g009000	SL3.0ch01	2944501	2946501	+	81	2983	64	3250	2.644	1.931	-0.712402	0.0307003	0.00686668	5.36564	0.981775	1
Solyc01g009015	SL3.0ch01	2950782	2952782	-	35	1583	12	966	2.163	1.227	-0.936171	0.0438447	0	-3.91086	1	1
Solyc01g009120	SL3.0ch01	3077562	3079562	-	1131	2537	920	2334	30.834	28.273	-2.56135	0.0107003	0.216635	4.0662	0.503179	1
Solyc01g009210	SL3.0ch01	3172123	3174123	+	38	1005	10	576	3.643	1.706	-1.93685	0.0160586	0	-3.91086	1	1
Solyc01g009220	SL3.0ch01	3181620	3183620	-	3792	8842	2693	8002	30.014	25.18	-4.83426	5.32145e-16	-0.357219	-1.7345	0.778426	1
Solyc01g009260	SL3.0ch01	3220496	3222496	+	2576	8818	2066	7787	22.608	20.968	-1.64016	0.00236342	-0.963133	-3.23619	1	1
Solyc01g009280	SL3.0ch01	3253968	3255968	-	876	8593	746	8230	9.251	8.311	-0.940189	0.0130855	0.0558237	5.55819	0.862974	1
Solyc01g009480	SL3.0ch01	3640739	3642739	-	2903	8930	2596	9365	24.533	21.704	-2.82921	2.42398e-07	0	-3.86959	1	1
Solyc01g009550	SL3.0ch01	3741980	3743980	+	7607	7873	6720	7980	49.141	45.714	-3.42654	3.39441e-09	0	-3.91086	1	1
Solyc01g009610	SL3.0ch01	3780779	3782779	-	3672	9207	2968	8228	28.512	26.509	-2.00206	0.000371863	0.0340493	4.24826	0.92284	1
Solyc01g009630	SL3.0ch01	3797042	3799042	+	2241	5898	2454	7139	27.534	25.581	-1.95294	0.00209453	-0.381643	4.96516	0.156298	1
Solyc01g009680	SL3.0ch01	3899628	3901628	+	1623	3507	1901	4568	31.637	29.386	-2.25112	0.0051798	0.832226	1.63251	0.233962	1
Solyc01g009770	SL3.0ch01	4093600	4095600	-	2756	7436	2397	6984	27.041	25.552	-1.48917	0.00980955	-0.186862	2.9834	0.720988	1
Solyc01g010050	SL3.0ch01	4617914	4619914	+	645	4594	514	4579	12.312	10.092	-2.21923	0.000260535	-0.425003	5.1104	0.171821	1
Solyc01g010150	SL3.0ch01	4872999	4874999	+	2474	1244	2201	1217	66.541	64.394	-2.14677	0.0281115	1.22357	3.21887	0.0215328	0.693925
Solyc01g010220	SL3.0ch01	4937360	4939360	+	867	4026	711	4022	17.719	15.022	-2.69701	0.00026315	-0.0403201	4.32899	0.917636	1
Solyc01g010390	SL3.0ch01	5197219	5199219	+	3320	7906	3191	8366	29.574	27.611	-1.96323	0.000695554	-0.148714	2.58213	0.762938	1
Solyc01g010470	SL3.0ch01	5304791	5306791	+	1279	4790	974	4111	21.074	19.154	-1.91994	0.00662973	0.0953373	-1.65173	0.966138	1
Solyc01g010508	SL3.0ch01	5448977	5450977	+	687	3230	754	4153	17.539	15.366	-2.17313	0.00369618	-0.155784	-3.17088	1	1
Solyc01g010525	SL3.0ch01	5482425	5484425	+	284	2411	149	3429	10.538	4.164	-6.3737	4.348e-22	-1.47047	-3.38419	0.486991	1
Solyc01g010720	SL3.0ch01	5702925	5704925	-	3782	7220	3251	7716	34.376	29.643	-4.73209	1.22437e-13	-2.12743	0.45585	0.0041963	0.283195
Solyc01g010850	SL3.0ch01	6235529	6237529	-	1776	6897	1437	6577	20.477	17.931	-2.54622	2.47127e-05	0	-3.91086	1	1
Solyc01g010990	SL3.0ch01	6792770	6794770	+	3157	7632	2030	5467	29.261	27.077	-2.18379	0.000823704	0.206406	4.10251	0.549764	1
Solyc01g012710	SL3.0ch01	9836182	9838182	+	988	4970	734	4118	16.583	15.128	-1.45496	0.0208118	0	-3.91086	1	1
Solyc01g012730	SL3.0ch01	9918301	9920301	-	511	1901	336	1457	21.186	18.74	-2.4462	0.0253563	0	-3.91086	1	1
Solyc01g014060	SL3.0ch01	11083011	11085011	-	470	6046	303	5448	7.213	5.269	-1.94437	7.80394e-06	0	-3.91086	1	1
Solyc01g014370	SL3.0ch01	12495362	12497362	-	797	4481	529	4037	15.1	11.586	-3.51478	3.4788e-07	0	-3.91086	1	1
Solyc01g014725	SL3.0ch01	14609128	14611128	+	269	2701	236	3076	9.057	7.126	-1.93164	0.00307129	0	-3.91086	1	1
Solyc01g016360	SL3.0ch01	19004683	19006683	-	33	816	26	1042	3.887	2.434	-1.45247	0.0387356	0.443795	-1.84977	0.816411	1
Solyc01g016450	SL3.0ch01	19725215	19727215	-	1658	9101	1353	8250	15.41	14.089	-1.32101	0.00454837	-3.61683	-3.75958	0.44069	1
Solyc01g016550	SL3.0ch01	20424155	20426155	-	1143	7559	350	5063	13.135	6.466	-6.669	5.1533e-37	1.95247	-3.74789	1	1
Solyc01g016740	SL3.0ch01	21885371	21887371	-	1598	6604	1421	6381	19.483	18.213	-1.26977	0.0205009	0	-3.91086	1	1
Solyc01g017530	SL3.0ch01	23884431	23886431	-	842	3458	238	1174	19.581	16.856	-2.72587	0.0120571	2.70364	-2.1897	0.100486	1
Solyc01g017630	SL3.0ch01	24486176	24488176	+	346	4216	241	3752	7.584	6.036	-1.54883	0.00274243	0	-3.91086	1	1
Solyc01g017650	SL3.0ch01	24628936	24630936	+	843	4067	821	4527	17.169	15.352	-1.81751	0.00692742	0	-3.91086	1	1
Solyc01g017690	SL3.0ch01	24774561	24776561	+	1092	5412	847	4660	16.79	15.38	-1.40924	0.0183826	0	-3.91086	1	1
Solyc01g017700	SL3.0ch01	24775077	24777077	+	1036	4861	785	4169	17.568	15.846	-1.72247	0.00940103	0	-3.91086	1	1
Solyc01g017860	SL3.0ch01	25697710	25699710	+	1224	4938	1160	5146	19.864	18.395	-1.4685	0.0191268	-0.0425136	3.74751	0.905906	1
Solyc01g018070	SL3.0ch01	27300754	27302754	-	714	4588	631	4529	13.467	12.229	-1.23793	0.0295791	0	-3.91086	1	1
Solyc01g020360	SL3.0ch01	29342396	29344396	-	1149	7440	525	5375	13.378	8.898	-4.47927	1.39672e-16	0	-3.91086	1	1
Solyc01g020378	SL3.0ch01	29896586	29898586	-	1188	8079	699	6065	12.82	10.334	-2.48556	1.21943e-06	-2.56979	-1.23714	0.0902319	1
Solyc01g020400	SL3.0ch01	29896467	29898467	+	1189	8193	700	6273	12.673	10.039	-2.63448	1.82883e-07	0	-3.91086	1	1
Solyc01g021600	SL3.0ch01	31990638	31992638	+	2472	8606	1896	7445	22.314	20.298	-2.01688	0.000324452	-1.53447	-2.21633	0.471945	1
Solyc01g021740	SL3.0ch01	32690643	32692643	+	691	6834	603	6576	9.183	8.399	-0.783226	0.0446858	-1.88152	-2.79849	0.100771	1
Solyc01g033990	SL3.0ch01	35316300	35318300	+	2569	7830	2152	7686	24.704	21.874	-2.82993	1.82744e-06	0	-3.91086	1	1
Solyc01g034150	SL3.0ch01	36285927	36287927	-	60	3403	15	1815	1.733	0.82	-0.91293	0.00394562	0.456291	3.26695	0.256549	1
Solyc01g028860	SL3.0ch01	40989054	40991054	+	4156	10542	4206	11307	28.276	27.113	-1.16321	0.0126531	0.13947	9.02023	0.6261	1
Solyc01g028805	SL3.0ch01	42409185	42411185	+	2362	10168	1660	7617	18.851	17.894	-0.957043	0.0340102	0.474638	3.22533	0.436062	1
Solyc01g044520	SL3.0ch01	44092014	44094014	+	1127	2989	890	2761	27.381	24.377	-3.00407	0.00161113	0.45631	0.481281	0.716831	1
Solyc01g049840	SL3.0ch01	46574317	46576317	-	2440	6262	1761	5656	28.04	23.743	-4.29678	7.95857e-10	-1.8313	-2.13752	0.418097	1
Solyc01g049960	SL3.0ch01	47627525	47629525	-	3237	9431	2110	7784	25.553	21.326	-4.22652	2.34037e-13	-0.114768	5.45723	0.663992	1
Solyc01g056250	SL3.0ch01	52679581	52681581	-	512	6826	360	6728	6.977	5.079	-1.89837	1.78856e-06	0	-3.91086	1	1
Solyc01g056625	SL3.0ch01	55017417	55019417	+	26	676	1	241	3.704	0.413	-3.29048	0.00341399	0.137213	3.55728	0.668356	1
Solyc01g056660	SL3.0ch01	55521664	55523664	-	2401	8510	2179	8156	22.005	21.084	-0.92162	0.0481988	0	-3.91086	1	1
Solyc01g056850	SL3.0ch01	56987295	56989295	-	2001	11838	1342	9934	14.459	11.901	-2.55775	3.56975e-09	-0.997032	4.8358	0.185268	1
Solyc01g056880	SL3.0ch01	57370151	57372151	+	2551	8687	1980	7646	22.7	20.569	-2.13048	0.000142439	0	-3.91086	1	1
Solyc01g057260	SL3.0ch01	60236776	60238776	+	2290	6881	1613	5310	24.97	23.299	-1.67087	0.00807003	0.800647	-0.431702	0.422885	1
Solyc01g057275	SL3.0ch01	60278850	60280850	+	12	314	6	516	3.681	1.149	-2.53156	0.0126783	-0.995836	-2.42445	0.437665	1
Solyc01g057330	SL3.0ch01	60490094	60492094	+	552	6653	344	6990	7.661	4.69	-2.97086	1.88805e-13	-0.573199	-3.21283	1	1
Solyc01g057340	SL3.0ch01	60508172	60510172	-	860	3354	1039	4746	20.408	17.96	-2.44792	0.00131779	-0.11646	3.33378	0.741655	1
Solyc01g057490	SL3.0ch01	61051966	61053966	+	573	1679	520	2528	25.444	17.06	-8.38368	2.6156e-13	0.732103	1.36957	0.175101	1
Solyc01g057610	SL3.0ch01	62839878	62841878	+	1435	6811	1047	5959	17.402	14.944	-2.45804	3.30876e-05	0	-3.91086	1	1
Solyc01g057640	SL3.0ch01	63038158	63040158	+	2131	8585	1137	7388	19.886	13.337	-6.54891	8.87201e-33	0	-3.91086	1	1
Solyc01g057680	SL3.0ch01	63458067	63460067	+	1502	5357	1074	4717	21.898	18.546	-3.35222	2.91629e-06	2.4696	0.441378	0.0404619	0.927837
Solyc01g057740	SL3.0ch01	63547059	63549059	-	3853	7146	2838	5895	35.03	32.497	-2.53303	0.000141225	-1.93934	-3.87098	1	1
Solyc01g057773	SL3.0ch01	63676142	63678142	+	301	3279	287	3857	8.408	6.926	-1.48215	0.00854964	0	-3.91086	1	1
Solyc01g057910	SL3.0ch01	64316122	64318122	+	1430	8431	1003	6525	14.502	13.324	-1.17798	0.0140777	0.55194	2.9657	0.155569	1
Solyc01g057920	SL3.0ch01	64503173	64505173	-	343	9834	267	9246	3.37	2.807	-0.563659	0.0122676	0	-3.91086	1	1
Solyc01g058040	SL3.0ch01	64965082	64967082	-	595	9161	422	7501	6.099	5.326	-0.772546	0.0150912	0	-3.91086	1	1
Solyc01g058080	SL3.0ch01	65008956	65010956	-	198	1321	136	1369	13.035	9.037	-3.99835	0.000332959	0	-3.91086	1	1
Solyc01g058170	SL3.0ch01	65491261	65493261	+	20	1193	2	497	1.649	0.401	-1.248	0.0176373	-0.626477	2.0902	0.223474	1
Solyc01g058210	SL3.0ch01	65559641	65561641	-	1238	5995	1042	5726	17.116	15.396	-1.72002	0.00346037	-7.1456	-1.41099	1.30757e-06	0.000543829
Solyc01g058260	SL3.0ch01	65871282	65873282	-	6695	9646	6322	9457	40.971	40.066	-0.904654	0.0456487	-0.13695	7.40688	0.667702	1
Solyc01g058323	SL3.0ch01	66066309	66068309	+	3660	8360	2995	7493	30.449	28.556	-1.89281	0.00119291	0	-3.91086	1	1
Solyc01g058360	SL3.0ch01	66327542	66329542	+	9099	20302	3212	10220	30.948	23.913	-7.03488	5.93055e-50	0	-3.34951	1	1
Solyc01g058400	SL3.0ch01	66357491	66359491	+	2218	9151	1798	8781	19.509	16.996	-2.51326	1.44977e-06	0	-3.91086	1	1
Solyc01g058500	SL3.0ch01	66782775	66784775	-	415321	268929	111201	77445	60.697	58.947	-1.75034	1.01757e-41	1.56908	6.20693	0.00940956	0.463583
Solyc01g059780	SL3.0ch01	68349812	68351812	-	479	3041	427	3124	13.608	12.025	-1.58317	0.0246223	0	-3.91086	1	1
Solyc01g059886	SL3.0ch01	69039130	69041130	+	1369	8411	884	5967	13.998	12.903	-1.09473	0.0212254	0	-3.91086	1	1
Solyc01g059920	SL3.0ch01	69263635	69265635	+	1547	4148	1270	3861	27.164	24.752	-2.41267	0.0025682	-0.299405	2.5463	0.507313	1
Solyc01g059930	SL3.0ch01	69278761	69280761	+	4235	9718	3460	9008	30.352	27.751	-2.60085	3.13754e-06	0.188766	6.81254	0.610757	1
Solyc01g060080	SL3.0ch01	69524484	69526484	-	2408	5893	2009	5801	29.009	25.723	-3.28512	2.78053e-06	0.275657	5.32462	0.361443	1
Solyc01g060140	SL3.0ch01	69620226	69622226	-	32	820	16	944	3.756	1.667	-2.0892	0.00437509	-0.138687	6.37171	0.606376	1
Solyc01g060240	SL3.0ch01	69849246	69851246	+	3083	6076	2418	5605	33.661	30.138	-3.52253	7.80615e-07	-0.896873	4.19646	0.0683229	1
Solyc01g060340	SL3.0ch01	70216873	70218873	-	58	489	35	659	10.603	5.043	-5.56006	0.000210449	0	-3.91086	1	1
Solyc01g060355	SL3.0ch01	70522630	70524630	-	125	557	99	671	18.328	12.857	-5.4713	0.00263935	0	-3.91086	1	1
Solyc01g060370	SL3.0ch01	70734391	70736391	-	126	588	81	604	17.647	11.825	-5.82224	0.00155328	0	-3.91086	1	1
Solyc01g060380	SL3.0ch01	70808739	70810739	-	926	5153	247	2992	15.233	7.626	-7.60696	7.26758e-27	2.62629	-3.75877	0.605764	1
Solyc01g060390	SL3.0ch01	70809201	70811201	-	643	4520	157	2291	12.454	6.413	-6.0406	2.77611e-16	-3.0415	-3.76582	0.487984	1
Solyc01g060400	SL3.0ch01	70809838	70811838	-	252	3888	45	2078	6.087	2.12	-3.96731	2.73949e-13	0	-3.91086	1	1
Solyc01g060420	SL3.0ch01	70834023	70836023	-	1404	7269	1116	6246	16.188	15.159	-1.02925	0.0366175	0	-3.91086	1	1
Solyc01g065495	SL3.0ch01	71547608	71549608	+	716	3225	591	3520	18.168	14.376	-3.79191	3.77592e-06	0.364282	3.83573	0.305226	1
Solyc01g065970	SL3.0ch01	72540623	72542623	-	1033	5299	766	5036	16.314	13.202	-3.11162	1.41252e-06	0	-3.91086	1	1
Solyc01g066207	SL3.0ch01	73489420	73491420	-	997	4542	882	4475	18	16.464	-1.5352	0.0177689	0	-3.91086	1	1
Solyc01g066270	SL3.0ch01	73602163	73604163	-	1438	5204	1323	5332	21.65	19.88	-1.77032	0.00677055	1.78082	-2.5485	0.348337	1
Solyc01g066340	SL3.0ch01	73944125	73946125	-	373	2762	148	1476	11.898	9.113	-2.78463	0.00199101	0.371836	2.46789	0.406616	1
Solyc01g066380	SL3.0ch01	74055611	74057611	+	1443	7370	983	6607	16.374	12.951	-3.42229	9.85582e-10	0	-3.91086	1	1
Solyc01g066410	SL3.0ch01	74097035	74099035	-	1900	6487	1791	6686	22.654	21.128	-1.52635	0.00914286	0	-3.91086	1	1
Solyc01g066490	SL3.0ch01	74299443	74301443	+	1100	4916	903	4840	18.285	15.723	-2.56109	0.000165268	-1.37711	-2.89078	0.533278	1
Solyc01g066560	SL3.0ch01	74422357	74424357	+	213	3379	106	2585	5.93	3.939	-1.99079	0.000265084	-0.641096	-0.652705	0.469924	1
Solyc01g066760	SL3.0ch01	74757675	74759675	-	5724	7946	4393	6711	41.873	39.562	-2.31039	0.000167765	-0.390226	0.0275624	0.806418	1
Solyc01g066940	SL3.0ch01	75024149	75026149	+	4299	7328	4293	8191	36.974	34.388	-2.58627	2.28669e-05	0.189936	5.00617	0.558593	1
Solyc01g067030	SL3.0ch01	75184001	75186001	-	453	6752	387	6537	6.287	5.589	-0.698046	0.038083	-0.0163156	1.85884	0.985209	1
Solyc01g067230	SL3.0ch01	75443219	75445219	+	121	5630	55	4058	2.104	1.337	-0.766758	0.00253618	-0.0285338	-1.85681	1	1
Solyc01g067390	SL3.0ch01	75677303	75679303	+	1411	4942	706	4642	22.21	13.201	-9.00878	4.54692e-36	0.218992	7.03044	0.443153	1
Solyc01g067420	SL3.0ch01	75810336	75812336	-	562	2781	349	2049	16.811	14.554	-2.25745	0.0110732	0	-3.91086	1	1
Solyc01g067620	SL3.0ch01	76261582	76263582	+	30	758	9	618	3.807	1.435	-2.3717	0.00460024	0.789837	2.8009	0.202129	1
Solyc01g067630	SL3.0ch01	76287228	76289228	-	4393	8488	3977	8094	34.104	32.947	-1.15776	0.025987	-0.657932	3.91239	0.0683685	1
Solyc01g067690	SL3.0ch01	76392645	76394645	-	23	1130	1	291	1.995	0.342	-1.65233	0.0322121	-0.205014	2.24018	0.645573	1
Solyc01g067750	SL3.0ch01	76500105	76502105	+	1307	6326	1591	8386	17.123	15.947	-1.17634	0.0191828	-0.202686	5.55665	0.457653	1
Solyc01g067780	SL3.0ch01	76568296	76570296	+	247	3120	177	2649	7.336	6.263	-1.07264	0.0483933	-1.01523	-2.86068	0.437631	1
Solyc01g067880	SL3.0ch01	76673122	76675122	+	2955	5891	2863	6302	33.405	31.238	-2.16652	0.00117825	0	-3.91086	1	1
Solyc01g067930	SL3.0ch01	76750473	76752473	+	2108	10055	1662	8884	17.331	15.76	-1.57172	0.000980736	0.122473	4.99104	0.794621	1
Solyc01g067990	SL3.0ch01	76846920	76848920	+	4970	6464	4436	6395	43.467	40.957	-2.51034	0.000111689	0	-3.91086	1	1
Solyc01g068100	SL3.0ch01	77013470	77015470	-	1283	9005	1151	9011	12.471	11.327	-1.14433	0.00634	0.216408	8.06111	0.498284	1
Solyc01g068120	SL3.0ch01	77041874	77043874	+	2047	5424	1724	5640	27.399	23.411	-3.98809	3.00111e-08	-2.43873	-3.62421	0.451487	1
Solyc01g068240	SL3.0ch01	77162156	77164156	+	3403	7078	2880	6329	32.468	31.274	-1.19452	0.034583	-0.0598666	5.23056	0.824784	1
Solyc01g068270	SL3.0ch01	77217325	77219325	+	4075	9892	2901	7603	29.176	27.618	-1.55786	0.00441294	0.00611905	5.41957	0.987402	1
Solyc01g068430	SL3.0ch01	77487725	77489725	+	1270	8506	1114	8648	12.991	11.412	-1.5794	0.000503669	1.1076	-1.84881	0.516787	1
Solyc01g068460	SL3.0ch01	77514073	77516073	-	3132	7912	2995	8952	28.359	25.069	-3.29024	2.11622e-08	0	-3.91086	1	1
Solyc01g079180	SL3.0ch01	78135368	78137368	+	2406	6340	2101	5907	27.51	26.236	-1.27345	0.0308804	0	-3.91086	1	1
Solyc01g079200	SL3.0ch01	78146506	78148506	-	2549	8068	2115	7272	24.009	22.531	-1.47751	0.00748406	1.19662	1.57614	0.35032	1
Solyc01g079235	SL3.0ch01	78180880	78182880	+	674	7007	493	5853	8.775	7.769	-1.00623	0.0172068	-0.0293675	6.11158	0.913451	1
Solyc01g079270	SL3.0ch01	78220427	78222427	-	4574	7022	3847	6623	39.445	36.743	-2.70156	2.97222e-05	0	-3.91086	1	1
Solyc01g079290	SL3.0ch01	78233616	78235616	-	1104	6725	872	6852	14.101	11.289	-2.81193	1.56891e-07	1.30213	-0.241144	0.102516	1
Solyc01g079425	SL3.0ch01	78358129	78360129	+	20	923	2	367	2.121	0.542	-1.57889	0.0261792	0.517236	0.278693	0.340517	1
Solyc01g079460	SL3.0ch01	78375458	78377458	-	3895	5884	3133	5343	39.83	36.963	-2.86706	5.58898e-05	-1.01596	-3.1107	0.737592	1
Solyc01g079550	SL3.0ch01	78476109	78478109	+	25	748	15	984	3.234	1.502	-1.73265	0.0118868	0.976526	-1.31736	0.383225	1
Solyc01g079590	SL3.0ch01	78552806	78554806	+	3688	2065	2980	1796	64.106	62.395	-1.71037	0.033559	0.0245396	7.21153	0.935232	1
Solyc01g079670	SL3.0ch01	78651137	78653137	-	1456	7057	1178	6245	17.103	15.87	-1.23366	0.0190784	0.888957	2.76999	0.312924	1
Solyc01g079850	SL3.0ch01	78840518	78842518	-	2418	7943	2115	7645	23.338	21.67	-1.66743	0.00281814	-1.10086	-1.13696	0.333075	1
Solyc01g079865	SL3.0ch01	78863234	78865234	-	21	1002	3	401	2.053	0.743	-1.31021	0.0494332	0.0954083	3.15631	0.806494	1
Solyc01g079870	SL3.0ch01	78866653	78868653	-	2256	10753	1815	9290	17.342	16.344	-0.997851	0.0200145	0.241199	7.12117	0.362062	1
Solyc01g079880	SL3.0ch01	78887702	78889702	-	1900	8394	1247	6583	18.457	15.926	-2.53143	7.17015e-06	-0.384445	9.58865	0.206437	1
Solyc01g079990	SL3.0ch01	78981895	78983895	-	2206	9181	2027	8945	19.373	18.474	-0.898671	0.0407934	0	-3.91086	1	1
Solyc01g080070	SL3.0ch01	79079067	79081067	-	2749	11017	2207	9679	19.969	18.568	-1.40143	0.00279174	0.387152	4.26229	0.303462	1
Solyc01g080130	SL3.0ch01	79140332	79142332	-	4943	7105	4936	7531	41.028	39.593	-1.43503	0.011838	-0.266662	4.30854	0.44994	1
Solyc01g080210	SL3.0ch01	79283483	79285483	-	1644	11203	1391	11097	12.797	11.139	-1.65807	3.75439e-05	-0.141926	4.33187	0.735291	1
Solyc01g080220	SL3.0ch01	79285546	79287546	+	4459	5247	3721	4835	45.941	43.49	-2.45071	0.000609339	0.733334	4.09671	0.343695	1
Solyc01g080240	SL3.0ch01	79313065	79315065	+	1033	7010	910	7912	12.843	10.315	-2.52835	3.05547e-07	-0.200291	6.1448	0.444779	1
Solyc01g080520	SL3.0ch01	79616012	79618012	+	71	1761	56	2150	3.876	2.539	-1.33701	0.00969201	-1.9143	-3.87151	1	1
Solyc01g080760	SL3.0ch01	79841973	79843973	-	5667	6724	4693	6053	45.735	43.672	-2.06274	0.00105864	0.0629357	3.6354	0.852878	1
Solyc01g080787	SL3.0ch01	79907762	79909762	+	1608	4313	940	3759	27.158	20.004	-7.15332	2.04395e-17	0	-3.91086	1	1
Solyc01g080860	SL3.0ch01	80039227	80041227	-	122	1554	38	749	7.279	4.828	-2.45077	0.0117401	-0.0126487	6.26989	0.962466	1
Solyc01g080890	SL3.0ch01	80068458	80070458	+	15	1407	0	574	1.055	0	-1.05485	0.00479628	-0.194875	6.34294	0.551331	1
Solyc01g080910	SL3.0ch01	80101754	80103754	+	5375	8220	4613	8601	39.537	34.91	-4.62665	1.06262e-14	0.404891	7.21979	0.209385	1
Solyc01g080950	SL3.0ch01	80137334	80139334	+	1016	6166	1032	7023	14.146	12.812	-1.33456	0.0087163	0	-3.91086	1	1
Solyc01g081010	SL3.0ch01	80177540	80179540	-	1078	3547	965	3868	23.308	19.967	-3.34121	6.53834e-05	0.189955	9.5228	0.478331	1
Solyc01g081020	SL3.0ch01	80181397	80183397	-	480	1817	400	2113	20.897	15.917	-4.97959	7.44014e-06	0.614071	-2.11208	0.61134	1
Solyc01g081030	SL3.0ch01	80193532	80195532	-	3403	8573	2802	8169	28.415	25.54	-2.8751	9.40851e-07	0.000890227	5.90758	0.998234	1
Solyc01g081060	SL3.0ch01	80240849	80242849	+	2490	9113	2070	8130	21.46	20.294	-1.16585	0.017875	0.79332	9.20955	0.0879532	1
Solyc01g081080	SL3.0ch01	80281965	80283965	-	1961	7834	1532	7018	20.02	17.918	-2.10229	0.000207809	0	-3.91086	1	1
Solyc01g081170	SL3.0ch01	80325980	80327980	-	2258	4480	1896	4022	33.511	32.038	-1.47358	0.0379437	-0.321493	-0.929787	0.804858	1
Solyc01g081177	SL3.0ch01	80333680	80335680	+	388	7917	296	8412	4.672	3.399	-1.27271	1.96156e-05	0.565521	0.971707	0.302963	1
Solyc01g081297	SL3.0ch01	80385214	80387214	-	5399	9132	4389	7735	37.155	36.201	-0.954124	0.049253	0.147173	4.75428	0.681615	1
Solyc01g081360	SL3.0ch01	80441511	80443511	+	2315	9084	1654	7420	20.309	18.228	-2.0809	0.000134522	0	-3.91086	1	1
Solyc01g081440	SL3.0ch01	80505752	80507752	-	7139	6895	6435	6942	50.869	48.105	-2.76436	4.33227e-06	0.411927	3.9242	0.2577	1
Solyc01g081520	SL3.0ch01	80577140	80579140	-	2147	7260	847	3381	22.823	20.033	-2.79032	0.000188234	-0.0532933	5.94881	0.837807	1
Solyc01g081590	SL3.0ch01	80645927	80647927	-	232	4622	120	3806	4.78	3.057	-1.72302	3.05943e-05	0	-3.91086	1	1
Solyc01g081610	SL3.0ch01	80660571	80662571	-	2824	7978	2125	6458	26.143	24.758	-1.38506	0.0146583	-0.246655	6.14998	0.459433	1
Solyc01g081630	SL3.0ch01	80678640	80680640	+	207	7387	120	6849	2.726	1.722	-1.00392	3.26698e-05	0	-3.86962	1	1
Solyc01g081640	SL3.0ch01	80690362	80692362	-	2032	7732	1311	7192	20.811	15.418	-5.39306	1.53621e-20	-0.335504	-2.20332	0.772834	1
Solyc01g073700	SL3.0ch01	80956511	80958511	-	518	7356	384	6594	6.579	5.503	-1.0756	0.00374392	0	-3.91086	1	1
Solyc01g073740	SL3.0ch01	80989755	80991755	+	2000	10421	1365	9294	16.102	12.806	-3.29568	2.5917e-12	0.0500682	6.98425	0.87772	1
Solyc01g073780	SL3.0ch01	81038206	81040206	-	136	3106	85	2490	4.195	3.301	-0.893971	0.0392868	0	-3.69406	1	1
Solyc01g073910	SL3.0ch01	81129116	81131116	+	1516	8297	1183	8538	15.449	12.17	-3.27936	4.83228e-11	0.962239	1.51095	0.356953	1
Solyc01g074010	SL3.0ch01	81222780	81224780	-	371	7868	301	8468	4.503	3.433	-1.07043	0.000267488	0.149947	5.6552	0.594739	1
Solyc01g074020	SL3.0ch01	81222222	81224222	+	385	7922	299	8299	4.635	3.478	-1.15709	0.000109371	0.679824	3.32389	0.0561232	1
Solyc01g086710	SL3.0ch01	81532499	81534499	+	1328	2847	1332	3125	31.808	29.886	-1.92281	0.0270531	0.555011	4.97889	0.0841405	1
Solyc01g086957	SL3.0ch01	81736859	81738859	+	176	3095	90	2337	5.381	3.708	-1.67234	0.00205311	0.0056373	4.2907	0.987204	1
Solyc01g086960	SL3.0ch01	81750914	81752914	-	3025	6931	2594	6632	30.384	28.116	-2.26749	0.000385011	0.44319	8.87499	0.192154	1
Solyc01g087030	SL3.0ch01	81830031	81832031	-	5545	7958	4790	7414	41.065	39.249	-1.81552	0.00189114	0.61903	5.80658	0.0640894	1
Solyc01g087035	SL3.0ch01	81830256	81832256	-	5822	7840	4958	7250	42.615	40.613	-2.00184	0.000723871	0.544244	0.150506	0.47496	1
Solyc01g087260	SL3.0ch01	82083087	82085087	-	8977	8436	7321	7391	51.553	49.762	-1.79134	0.000899214	0.253684	8.39692	0.395988	1
Solyc01g087280	SL3.0ch01	82089600	82091600	+	604	9491	433	7725	5.983	5.308	-0.675487	0.0260931	0	-3.91086	1	1
Solyc01g087340	SL3.0ch01	82180221	82182221	-	913	5450	516	4178	14.349	10.993	-3.35582	1.82334e-07	0.432865	1.30541	0.333889	1
Solyc01g087338	SL3.0ch01	82183803	82185803	+	7636	7383	6520	6642	50.842	49.537	-1.30572	0.0147897	-2.36206	-3.6267	0.379242	1
Solyc01g087380	SL3.0ch01	82190435	82192435	-	710	6956	183	3283	9.262	5.28	-3.98181	3.01068e-13	0.0363484	3.81304	0.916321	1
Solyc01g087415	SL3.0ch01	82241086	82243086	-	108	3062	55	2195	3.407	2.444	-0.962496	0.0215622	0	-3.91086	1	1
Solyc01g087430	SL3.0ch01	82279647	82281647	-	1733	10986	1384	9668	13.625	12.523	-1.10266	0.00672389	0.0162857	4.78414	0.960723	1
Solyc01g087460	SL3.0ch01	82298979	82300979	+	70	2985	42	2619	2.291	1.578	-0.712972	0.0270576	-4.02177	-3.69902	0.161415	1
Solyc01g087690	SL3.0ch01	82493437	82495437	-	6960	4518	5149	3734	60.638	57.965	-2.67309	9.01874e-05	1.78816	-3.87428	1	1
Solyc01g087700	SL3.0ch01	82492962	82494962	+	7277	5477	5370	4335	57.057	55.332	-1.72431	0.00549584	-2.79109	-3.19418	0.19492	1
Solyc01g087840	SL3.0ch01	82587626	82589626	+	15	1143	0	260	1.295	0	-1.29534	0.0410048	-0.146487	1.83407	0.822464	1
Solyc01g087850	SL3.0ch01	82592920	82594920	+	237	5215	144	3827	4.347	3.626	-0.720738	0.0378559	-1.10713	4.52347	0.153269	1
Solyc01g088050	SL3.0ch01	82772932	82774932	+	3394	9426	2347	7279	26.474	24.382	-2.09238	0.000261771	0.154869	1.34201	0.809172	1
Solyc01g088280	SL3.0ch01	82950766	82952766	-	2709	4819	1870	3840	35.986	32.75	-3.23609	7.99297e-05	0	-3.91086	1	1
Solyc01g088640	SL3.0ch01	83282940	83284940	-	4968	6290	4488	6891	44.129	39.441	-4.68754	1.63461e-12	0.338451	4.46869	0.283726	1
Solyc01g088650	SL3.0ch01	83289591	83291591	-	905	5198	808	5214	14.829	13.417	-1.4113	0.0137433	-0.0144347	4.31288	0.964382	1
Solyc01g088730	SL3.0ch01	83373965	83375965	-	210	3762	168	4196	5.287	3.85	-1.43733	0.00115305	0.150741	5.55801	0.597975	1
Solyc01g089880	SL3.0ch01	83475141	83477141	-	592	2790	368	1964	17.504	15.78	-1.72399	0.0420543	0.397508	2.85906	0.684056	1
Solyc01g090000	SL3.0ch01	83588119	83590119	-	1089	4558	714	3404	19.285	17.339	-1.94606	0.00814213	0	-3.91086	1	1
Solyc01g090170	SL3.0ch01	83663698	83665698	+	376	7286	249	6056	4.907	3.949	-0.958088	0.00379386	0.0017236	6.18382	0.99572	1
Solyc01g090180	SL3.0ch01	83682483	83684483	-	42	1029	12	514	3.922	2.281	-1.6402	0.0479506	-1.46324	0.334483	0.0685822	1
Solyc01g090280	SL3.0ch01	83827184	83829184	-	1298	4192	1146	4188	23.643	21.485	-2.15817	0.00433261	-0.0354173	5.77417	0.89136	1
Solyc01g090300	SL3.0ch01	83837126	83839126	+	2338	8031	1861	7114	22.548	20.735	-1.8126	0.00144399	-1.52471	-2.0277	0.392896	1
Solyc01g090380	SL3.0ch01	83953986	83955986	+	3455	8353	3060	8214	29.26	27.142	-2.11773	0.000248788	0.0908272	4.10823	0.768993	1
Solyc01g090480	SL3.0ch01	84041717	84043717	-	276	4240	194	3792	6.112	4.867	-1.24457	0.00725828	0.0629057	5.08197	0.845181	1
Solyc01g090500	SL3.0ch01	84040408	84042408	+	281	4366	193	3927	6.047	4.684	-1.36245	0.00303609	0.242801	5.06921	0.42339	1
Solyc01g090840	SL3.0ch01	84416643	84418643	+	1745	8960	1528	8993	16.301	14.523	-1.77746	0.000244518	0.369404	1.83736	0.646238	1
Solyc01g090980	SL3.0ch01	84551406	84553406	+	2372	2552	1925	2774	48.172	40.966	-7.20605	2.22173e-12	2.84861	-3.4033	0.257926	1
Solyc01g090990	SL3.0ch01	84563336	84565336	-	2009	6835	1645	6449	22.716	20.324	-2.39227	0.000115707	-0.0997618	4.38712	0.734932	1
Solyc01g091050	SL3.0ch01	84645695	84647695	-	2012	6170	1680	6361	24.591	20.893	-3.69764	2.46054e-08	0	-3.87283	1	1
Solyc01g091200	SL3.0ch01	84760335	84762335	+	1181	9871	899	8622	10.686	9.442	-1.24356	0.00194458	-0.174472	2.17199	0.779859	1
Solyc01g091270	SL3.0ch01	84804327	84806327	-	33	1052	5	360	3.041	1.37	-1.67161	0.0418847	0.371829	7.1163	0.333489	1
Solyc01g091400	SL3.0ch01	84912068	84914068	-	792	5081	709	5574	13.485	11.284	-2.20102	0.000172263	0	-3.78486	1	1
Solyc01g091410	SL3.0ch01	84914774	84916774	-	1672	6976	1326	5979	19.334	18.152	-1.182	0.0282711	0	-3.91086	1	1
Solyc01g091490	SL3.0ch01	84996727	84998727	-	3355	7492	2559	7011	30.93	26.74	-4.1904	6.83455e-11	0.0987184	-2.35514	1	1
Solyc01g091585	SL3.0ch01	85049491	85051491	-	43	984	14	815	4.187	1.689	-2.49817	0.00109534	-2.31064	-2.79998	0.113669	1
Solyc01g091705	SL3.0ch01	85174986	85176986	+	70	1229	78	2302	5.389	3.277	-2.11145	0.00165605	0.51501	3.13027	0.227211	1
Solyc01g091760	SL3.0ch01	85217581	85219581	-	3134	6156	3224	7082	33.735	31.283	-2.45245	0.000184298	0	-3.7043	1	1
Solyc01g091780	SL3.0ch01	85226438	85228438	+	218	2977	200	3516	6.823	5.382	-1.44103	0.00714052	-0.651966	3.77673	0.0918496	1
Solyc01g091810	SL3.0ch01	85243113	85245113	-	331	3407	216	2837	8.855	7.075	-1.77999	0.00458801	0	-3.6626	1	1
Solyc01g092950	SL3.0ch01	85369033	85371033	+	1129	6322	925	5671	15.152	14.024	-1.12868	0.0297947	-3.02978	-3.42139	0.252708	1
Solyc01g093970	SL3.0ch01	85420538	85422538	+	5749	9788	4640	9135	37.002	33.684	-3.31778	4.02035e-09	0.0880188	5.20481	0.783704	1
Solyc01g094000	SL3.0ch01	85456728	85458728	-	2343	7686	2333	8536	23.362	21.465	-1.89753	0.000690478	-0.0268273	6.0979	0.92188	1
Solyc01g094020	SL3.0ch01	85468008	85470008	-	4152	7807	3292	6613	34.719	33.236	-1.48288	0.0114263	-0.373161	3.39839	0.46106	1
Solyc01g094090	SL3.0ch01	85546030	85548030	+	9852	8273	6322	6439	54.356	49.542	-4.81429	2.09572e-16	0	-3.91086	1	1
Solyc01g094100	SL3.0ch01	85558171	85560171	-	90	1439	5	277	5.886	1.773	-4.11315	0.00192799	-4.9367	-3.00262	0.027696	0.784969
Solyc01g094160	SL3.0ch01	85590783	85592783	-	1870	7824	1843	8582	19.29	17.679	-1.61163	0.00204747	0	-3.54109	1	1
Solyc01g094830	SL3.0ch01	86117901	86119901	-	107	3235	91	3729	3.202	2.382	-0.819477	0.0182216	-0.227732	2.53464	0.604331	1
Solyc01g094945	SL3.0ch01	86219647	86221647	+	75	1641	40	1497	4.371	2.602	-1.76816	0.0042668	1.67815	-2.79286	0.283663	1
Solyc01g094960	SL3.0ch01	86230631	86232631	+	1974	6130	1838	6111	24.358	23.122	-1.23594	0.0316679	0.138621	3.95048	0.709678	1
Solyc01g094990	SL3.0ch01	86245547	86247547	+	4087	8440	3689	8468	32.626	30.345	-2.28087	8.74757e-05	-0.825737	-2.78942	0.727509	1
Solyc01g095050	SL3.0ch01	86296781	86298781	-	1352	6406	1104	5716	17.427	16.188	-1.23949	0.0237652	0.0608891	9.13684	0.842205	1
Solyc01g095080	SL3.0ch01	86331529	86333529	-	1372	6808	1037	5919	16.773	14.908	-1.86462	0.00112808	3.93952	8.53518	4.85826e-06	0.00163934
Solyc01g095170	SL3.0ch01	86403418	86405418	+	203	2229	130	2141	8.347	5.724	-2.62269	0.000344046	-0.0453489	1.02091	0.95161	1
Solyc01g095190	SL3.0ch01	86415801	86417801	+	503	5172	429	5363	8.863	7.407	-1.45667	0.00267516	-0.49086	-2.10672	0.777768	1
Solyc01g095310	SL3.0ch01	86499966	86501966	+	81	2870	45	2376	2.745	1.859	-0.886096	0.0185111	2.05768	-2.0303	0.106918	1
Solyc01g095305	SL3.0ch01	86501727	86503727	+	474	3238	336	3064	12.769	9.882	-2.88704	0.000100323	0.499413	5.13401	0.621838	1
Solyc01g095320	SL3.0ch01	86502562	86504562	+	474	3282	348	3754	12.62	8.484	-4.13614	3.27298e-09	0.263733	10.921	0.734104	1
Solyc01g095380	SL3.0ch01	86529643	86531643	-	5126	6330	4524	6084	44.745	42.647	-2.09805	0.00107239	0	-3.72533	1	1
Solyc01g095410	SL3.0ch01	86547715	86549715	+	186	976	113	960	16.007	10.531	-5.47566	0.000106352	0.166185	7.16462	0.614578	1
Solyc01g095490	SL3.0ch01	86605517	86607517	+	2178	9144	1789	8292	19.237	17.746	-1.49063	0.00296853	0.227658	5.4237	0.431339	1
Solyc01g095570	SL3.0ch01	86656019	86658019	-	745	9171	573	7750	7.513	6.885	-0.628573	0.0492313	0	-3.91086	1	1
Solyc01g095580	SL3.0ch01	86666328	86668328	+	5853	9677	4193	8046	37.688	34.259	-3.42901	4.57053e-09	-0.0623911	6.68358	0.838338	1
Solyc01g095600	SL3.0ch01	86687845	86689845	+	169	4516	57	3272	3.607	1.712	-1.89503	2.37959e-07	0.242157	1.77063	0.681619	1
Solyc01g095610	SL3.0ch01	86694292	86696292	+	5902	8721	4775	7991	40.361	37.404	-2.95703	5.50149e-07	-0.0312501	2.76586	0.964653	1
Solyc01g095690	SL3.0ch01	86752465	86754465	+	1863	3404	1453	2938	35.371	33.09	-2.28077	0.0100596	-1.30756	1.43785	0.126618	1
Solyc01g095850	SL3.0ch01	86877247	86879247	-	14	530	11	816	2.574	1.33	-1.24342	0.0466021	0	-3.91086	1	1
Solyc01g095930	SL3.0ch01	86940743	86942743	+	338	2961	101	3294	10.246	2.975	-7.27057	1.36487e-33	-0.440399	5.62942	0.311138	1
Solyc01g095950	SL3.0ch01	86944858	86946858	+	5447	8793	5036	8476	38.251	37.271	-0.98083	0.0426607	1.81067	-3.56171	1	1
Solyc01g096090	SL3.0ch01	87078039	87080039	-	4139	8735	3034	6885	32.15	30.588	-1.56231	0.00649802	-0.2056	7.77241	0.511816	1
Solyc01g096130	SL3.0ch01	87119354	87121354	-	2056	9080	1618	8730	18.463	15.636	-2.82677	4.3462e-08	0.148518	5.41583	0.616493	1
Solyc01g096205	SL3.0ch01	87180375	87182375	-	69	2397	25	1406	2.798	1.747	-1.05102	0.0198815	-0.943022	0.0874219	0.142422	1
Solyc01g096290	SL3.0ch01	87253245	87255245	+	405	6600	333	6674	5.782	4.752	-1.02919	0.003713	0.204266	7.59965	0.541328	1
Solyc01g096530	SL3.0ch01	87479061	87481061	+	113	3382	77	3023	3.233	2.484	-0.749319	0.0360973	0.312976	5.31161	0.246546	1
Solyc01g096560	SL3.0ch01	87511231	87513231	+	2670	4586	2446	4898	36.797	33.306	-3.49103	8.86596e-06	-0.922348	-0.27858	0.277587	1
Solyc01g096600	SL3.0ch01	87554867	87556867	-	6191	9236	5198	8093	40.131	39.109	-1.02177	0.0373027	0.203609	5.64893	0.449718	1
Solyc01g096690	SL3.0ch01	87593075	87595075	-	1514	6061	936	6300	19.987	12.935	-7.05148	3.94375e-30	1.78455	-3.73058	1	1
Solyc01g096800	SL3.0ch01	87669226	87671226	+	5451	8296	4829	8333	39.652	36.689	-2.96333	5.76533e-07	0.0666019	4.58467	0.846594	1
Solyc01g096900	SL3.0ch01	87760101	87762101	+	2791	5515	2337	5246	33.602	30.819	-2.78328	0.000134507	-0.256883	4.53025	0.473317	1
Solyc01g096940	SL3.0ch01	87819539	87821539	-	1125	7378	947	8233	13.231	10.316	-2.91472	2.28225e-09	-0.802873	1.61755	0.317312	1
Solyc01g096980	SL3.0ch01	87846986	87848986	-	1225	1088	1006	1431	52.962	41.28	-11.6813	1.80253e-15	-0.796939	-3.1045	0.847013	1
Solyc01g097310	SL3.0ch01	88079051	88081051	+	18	711	11	1070	2.469	1.018	-1.45156	0.0109968	-0.240372	5.93324	0.415235	1
Solyc01g097330	SL3.0ch01	88102591	88104591	+	7881	9049	4908	7490	46.551	39.587	-6.96347	1.20345e-31	-0.107658	3.88269	0.765998	1
Solyc01g097470	SL3.0ch01	88192998	88194998	-	811	5007	673	5643	13.939	10.655	-3.28402	4.31603e-08	1.24405	2.26913	0.327639	1
Solyc01g097480	SL3.0ch01	88193362	88195362	+	795	5209	676	6295	13.241	9.697	-3.54386	3.82489e-10	1.79156	-3.75331	1	1
Solyc01g097490	SL3.0ch01	88194044	88196044	+	578	4817	527	5107	10.714	9.354	-1.3597	0.00999379	-1.62754	-3.45452	0.560327	1
Solyc01g097500	SL3.0ch01	88208717	88210717	-	3217	8632	2664	7626	27.15	25.889	-1.26076	0.017771	-0.00533349	6.11362	0.986459	1
Solyc01g097530	SL3.0ch01	88221311	88223311	+	25	978	3	530	2.493	0.563	-1.92967	0.00443437	0.56012	-2.21978	0.617301	1
Solyc01g097620	SL3.0ch01	88271940	88273940	+	93	3014	72	3253	2.993	2.165	-0.827828	0.0199467	1.80839	-2.98189	1	1
Solyc01g097700	SL3.0ch01	88315518	88317518	+	4775	5372	4322	5099	47.058	45.876	-1.18201	0.0455548	-1.94065	-3.72817	1	1
Solyc01g097790	SL3.0ch01	88378123	88380123	-	6273	10244	5100	9209	37.979	35.642	-2.33715	1.83968e-05	0.128457	4.74114	0.634935	1
Solyc01g097810	SL3.0ch01	88398744	88400744	-	1267	6595	1058	6763	16.115	13.528	-2.58781	4.87732e-06	-0.271169	6.78529	0.374645	1
Solyc01g097930	SL3.0ch01	88479333	88481333	+	2384	7611	2156	7550	23.852	22.213	-1.63886	0.00370354	-3.46634	-3.41812	0.317875	1
Solyc01g097950	SL3.0ch01	88485563	88487563	+	1359	6944	937	6045	16.368	13.42	-2.94735	3.55255e-07	-1.05591	1.82786	0.172845	1
Solyc01g098040	SL3.0ch01	88526341	88528341	-	690	7661	490	6205	8.262	7.319	-0.943589	0.0165837	-0.464474	-1.5455	0.679607	1
Solyc01g098270	SL3.0ch01	88725757	88727757	+	535	6388	334	6160	7.728	5.143	-2.58465	1.49877e-09	0	-3.91086	1	1
Solyc01g098280	SL3.0ch01	88731412	88733412	+	5941	9092	5337	9541	39.52	35.872	-3.64797	1.17037e-10	-3.3349	-3.33211	0.267539	1
Solyc01g098300	SL3.0ch01	88744687	88746687	+	912	6322	777	6784	12.607	10.276	-2.33071	7.32381e-06	0	-3.91086	1	1
Solyc01g098450	SL3.0ch01	88843989	88845989	+	2193	6888	1687	6807	24.149	19.861	-4.28824	1.24604e-11	0.164363	3.18526	0.753649	1
Solyc01g098460	SL3.0ch01	88850383	88852383	+	49	2407	23	2206	1.995	1.032	-0.963261	0.00479251	0.0888541	4.38248	0.781062	1
Solyc01g098770	SL3.0ch01	89085285	89087285	-	56	1345	5	507	3.997	0.977	-3.02058	0.000247055	3.64823	-2.45012	0.0999375	1
Solyc01g098817	SL3.0ch01	89106703	89108703	-	1460	1887	1272	1795	43.621	41.474	-2.1474	0.0399006	-1.92544	-3.73043	1	1
Solyc01g098860	SL3.0ch01	89121268	89123268	+	22	677	10	574	3.147	1.712	-1.43502	0.0495598	-1.19057	0.0513126	0.199321	1
Solyc01g098880	SL3.0ch01	89134050	89136050	+	27	706	4	645	3.683	0.616	-3.06716	5.84314e-05	0.188397	6.58772	0.477614	1
Solyc01g098890	SL3.0ch01	89143367	89145367	-	458	5642	409	6136	7.508	6.249	-1.25915	0.00313608	1.1066	-0.43884	0.354382	1
Solyc01g098910	SL3.0ch01	89157371	89159371	-	3832	9936	3566	9697	27.833	26.887	-0.945827	0.0388337	-0.0792124	7.15678	0.87164	1
Solyc01g098980	SL3.0ch01	89213435	89215435	-	36	835	3	193	4.133	1.531	-2.60257	0.042521	0.476983	-0.605461	0.63389	1
Solyc01g099010	SL3.0ch01	89233154	89235154	-	5479	8054	4160	6580	40.486	38.734	-1.75251	0.00334655	0	-3.91086	1	1
Solyc01g099030	SL3.0ch01	89278818	89280818	-	27	942	4	367	2.786	1.078	-1.70821	0.0325744	-0.358506	-1.47297	0.782126	1
Solyc01g099090	SL3.0ch01	89288229	89290229	-	3403	11318	2121	9884	23.117	17.668	-5.449	3.17827e-27	-0.304621	6.92324	0.30656	1
Solyc01g099120	SL3.0ch01	89317316	89319316	+	1343	3485	1389	4021	27.817	25.675	-2.14222	0.00794322	0.185035	3.8981	0.615664	1
Solyc01g099160	SL3.0ch01	89351122	89353122	+	6236	8686	5425	8384	41.791	39.286	-2.50467	1.31218e-05	0.742198	4.16949	0.110607	1
Solyc01g099180	SL3.0ch01	89362504	89364504	+	1039	4394	766	4377	19.124	14.894	-4.22984	9.50367e-09	1.39019	4.24504	0.111954	1
Solyc01g099440	SL3.0ch01	89569900	89571900	+	82	3019	43	2529	2.644	1.672	-0.972458	0.00758345	0.904855	0.448033	0.259795	1
Solyc01g099450	SL3.0ch01	89570009	89572009	+	82	2956	43	2529	2.699	1.672	-1.02729	0.00595676	-0.820808	0.263951	0.218074	1
Solyc01g099483	SL3.0ch01	89604325	89606325	+	18	802	4	502	2.195	0.791	-1.40461	0.0350738	0.534777	-2.2693	0.698836	1
Solyc01g099540	SL3.0ch01	89630484	89632484	+	1755	2428	1956	3063	41.956	38.972	-2.98363	0.00221453	0	-3.86778	1	1
Solyc01g099745	SL3.0ch01	89776226	89778226	+	11	227	18	823	4.622	2.14	-2.48154	0.0312673	-0.0502967	6.09418	0.895925	1
Solyc01g099790	SL3.0ch01	89809377	89811377	+	3637	9619	2957	8660	27.437	25.454	-1.98256	0.000288817	0.0338565	6.92068	0.894321	1
Solyc01g099850	SL3.0ch01	89863994	89865994	+	897	7035	574	5025	11.309	10.252	-1.05679	0.0258322	3.74393	-1.49145	0.000217746	0.0345051
Solyc01g099925	SL3.0ch01	89920626	89922626	+	637	4373	415	4437	12.715	8.553	-4.1614	3.18326e-11	-0.207296	0.434476	0.773453	1
Solyc01g100000	SL3.0ch01	89964112	89966112	-	281	6697	153	5566	4.027	2.675	-1.35165	2.30353e-05	-1.03716	5.86395	0.000535628	0.0662919
Solyc01g100020	SL3.0ch01	89972450	89974450	+	2807	6750	2390	6372	29.371	27.277	-2.09426	0.00108474	-1.31677	1.2886	0.0162568	0.614017
Solyc01g100040	SL3.0ch01	89992150	89994150	-	1003	3927	921	4061	20.345	18.487	-1.85828	0.0102942	-0.247251	4.18457	0.644039	1
Solyc01g100060	SL3.0ch01	90036337	90038337	+	70	3562	30	2509	1.927	1.182	-0.745745	0.0124648	0.114961	5.2648	0.711938	1
Solyc01g100070	SL3.0ch01	90043529	90045529	-	98	1109	14	808	8.119	1.703	-6.41614	5.53797e-11	-1.72116	-1.24784	0.39469	1
Solyc01g100080	SL3.0ch01	90042186	90044186	+	126	2359	43	1973	5.07	2.133	-2.93749	1.52692e-07	0.0963496	3.91589	0.792635	1
Solyc01g100440	SL3.0ch01	90340729	90342729	-	3467	9328	2595	7759	27.097	25.063	-2.03374	0.000331766	0.292081	-3.40668	1	1
Solyc01g100455	SL3.0ch01	90352503	90354503	+	193	1409	142	1582	12.047	8.237	-3.81078	0.000194483	-0.32055	0.2815	0.683995	1
Solyc01g100630	SL3.0ch01	90479529	90481529	+	698	2945	471	2383	19.16	16.503	-2.65688	0.00329438	0.346283	3.57972	0.506381	1
Solyc01g100650	SL3.0ch01	90493588	90495588	+	767	5230	472	4519	12.79	9.457	-3.33271	3.83456e-08	-0.387626	5.99085	0.179072	1
Solyc01g100800	SL3.0ch01	90614869	90616869	-	52	1283	13	544	3.895	2.334	-1.5612	0.0448088	0.235637	1.6391	0.622718	1
Solyc01g100810	SL3.0ch01	90620881	90622881	-	1009	7915	601	6340	11.307	8.659	-2.64789	4.44416e-08	-0.848719	4.76816	0.0123749	0.537166
Solyc01g101050	SL3.0ch01	90784800	90786800	+	3592	7983	3315	7882	31.032	29.606	-1.42625	0.0103064	0	-2.41046	1	1
Solyc01g101100	SL3.0ch01	90829283	90831283	-	1520	7757	1097	6272	16.385	14.887	-1.49792	0.00471258	-0.344957	4.88191	0.305409	1
Solyc01g101140	SL3.0ch01	90863084	90865084	+	1057	7521	838	7355	12.322	10.228	-2.09398	1.58537e-05	0.0249526	7.0594	0.937156	1
Solyc01g101240	SL3.0ch01	90932540	90934540	+	6233	9385	5645	8956	39.909	38.662	-1.24734	0.0137781	0.135359	7.73702	0.714456	1
Solyc01g102260	SL3.0ch01	90968683	90970683	-	431	4030	155	3215	9.662	4.599	-5.0621	1.93801e-17	-0.102986	0.751029	0.911226	1
Solyc01g102270	SL3.0ch01	90968846	90970846	+	423	3761	150	2781	10.11	5.118	-4.99224	1.85842e-14	-1.11333	3.3205	0.0138025	0.570738
Solyc01g102265	SL3.0ch01	90969001	90971001	+	417	3469	140	2360	10.731	5.6	-5.13083	6.85272e-13	0.0282598	-2.79043	1	1
Solyc01g102300	SL3.0ch01	90997673	90999673	+	3772	7944	3536	8435	32.195	29.538	-2.65724	8.44931e-06	0.450071	6.05171	0.241196	1
Solyc01g102340	SL3.0ch01	91039662	91041662	+	426	6981	343	6417	5.751	5.074	-0.677352	0.0379634	-0.409045	4.67368	0.361149	1
Solyc01g102380	SL3.0ch01	91087753	91089753	+	2052	5166	1513	4475	28.429	25.267	-3.16173	3.57862e-05	0	-3.91086	1	1
Solyc01g102480	SL3.0ch01	91151930	91153930	-	3033	7981	3102	8798	27.538	26.067	-1.47045	0.00665446	-0.0261121	5.55531	0.919486	1
Solyc01g102637	SL3.0ch01	91265729	91267729	-	4906	7574	4540	7643	39.311	37.265	-2.04586	0.000628123	0	-3.91086	1	1
Solyc01g102670	SL3.0ch01	91290059	91292059	-	4409	6959	3817	6661	38.784	36.429	-2.3556	0.000241026	0.43551	3.17593	0.244197	1
Solyc01g102675	SL3.0ch01	91289976	91291976	+	4412	6807	3809	6333	39.326	37.557	-1.76945	0.00457975	0	-3.58636	1	1
Solyc01g102685	SL3.0ch01	91297665	91299665	+	43	1961	21	1505	2.146	1.376	-0.769562	0.0452631	2.55294	-2.77168	0.611666	1
Solyc01g102890	SL3.0ch01	91444225	91446225	-	669	9184	444	6882	6.79	6.061	-0.729204	0.0271174	0	-3.91086	1	1
Solyc01g102990	SL3.0ch01	91518876	91520876	+	2286	8101	1873	7749	22.008	19.466	-2.54247	8.04027e-06	-0.0104454	5.12531	0.969741	1
Solyc01g103000	SL3.0ch01	91534989	91536989	+	34	1999	13	1390	1.672	0.927	-0.745819	0.0345433	-0.0240635	-3.5559	1	1
Solyc01g103190	SL3.0ch01	91728058	91730058	+	25	1376	7	1216	1.784	0.572	-1.21208	0.00375125	0.0842317	0.528281	0.903961	1
Solyc01g103185	SL3.0ch01	91729510	91731510	+	88	3086	50	3085	2.773	1.595	-1.17763	0.000894915	0.270642	3.91505	0.383325	1
Solyc01g103370	SL3.0ch01	91866909	91868909	+	2376	10365	1743	8405	18.648	17.176	-1.47266	0.00239898	0.0623945	6.32545	0.830203	1
Solyc01g103420	SL3.0ch01	91902558	91904558	+	3751	11112	2936	9885	25.237	22.9	-2.33724	5.36495e-06	0.13862	6.38133	0.621997	1
Solyc01g103457	SL3.0ch01	91945789	91947789	-	710	5309	476	4417	11.796	9.728	-2.0678	0.000399742	-0.45385	-1.36738	0.769619	1
Solyc01g103460	SL3.0ch01	91944980	91946980	+	643	4599	435	3773	12.266	10.337	-1.92886	0.00203474	-0.107907	3.4553	0.781735	1
Solyc01g103500	SL3.0ch01	91973854	91975854	-	1967	6287	1751	5974	23.831	22.667	-1.1642	0.0395439	0.373609	1.04185	0.712806	1
Solyc01g103720	SL3.0ch01	92156303	92158303	-	128	1806	48	1473	6.618	3.156	-3.46259	3.14915e-06	0.205185	7.02856	0.454581	1
Solyc01g104090	SL3.0ch01	92455179	92457179	-	98	885	27	440	9.969	5.782	-4.1879	0.00501372	-0.305498	0.065107	0.685495	1
Solyc01g104150	SL3.0ch01	92515634	92517634	-	6283	10049	4863	8203	38.47	37.219	-1.25175	0.0146405	2.10859	-3.07488	0.261975	1
Solyc01g104270	SL3.0ch01	92591552	92593552	+	4055	4899	3428	4537	45.287	43.038	-2.24873	0.00203249	-0.123826	6.38824	0.703427	1
Solyc01g104540	SL3.0ch01	92891584	92893584	+	2495	11473	1879	10094	17.862	15.694	-2.16861	3.0992e-06	0.284325	5.52726	0.315297	1
Solyc01g104590	SL3.0ch01	92939455	92941455	-	4778	7897	3960	7391	37.696	34.887	-2.80946	5.534e-06	0.00709829	9.57732	0.980747	1
Solyc01g104600	SL3.0ch01	92940772	92942772	+	4237	8640	3317	7764	32.904	29.934	-2.96951	8.22121e-07	0.245175	4.64918	0.424917	1
Solyc01g104610	SL3.0ch01	92950574	92952574	-	404	4372	316	4052	8.459	7.234	-1.22453	0.0164707	1.94273	-3.69262	1	1
Solyc01g104650	SL3.0ch01	92972817	92974817	+	5182	3457	5159	4226	59.984	54.971	-5.0131	1.69948e-11	1.5371	6.31769	0.00559431	0.339148
Solyc01g104710	SL3.0ch01	93011257	93013257	-	2756	7888	1883	6288	25.893	23.045	-2.84761	6.17863e-06	-0.168893	4.72936	0.728724	1
Solyc01g104775	SL3.0ch01	93034082	93036082	-	2173	8340	1732	7773	20.67	18.222	-2.44766	1.09435e-05	0.151018	7.91048	0.563203	1
Solyc01g104780	SL3.0ch01	93042867	93044867	-	1840	7527	1463	6534	19.643	18.294	-1.34907	0.0126898	0.792447	1.03176	0.275549	1
Solyc01g104790	SL3.0ch01	93047856	93049856	+	3709	6554	3171	5951	36.14	34.762	-1.37742	0.0224591	0.101346	3.54583	0.75899	1
Solyc01g104940	SL3.0ch01	93154592	93156592	+	160	1829	20	1232	8.044	1.597	-6.4468	1.41419e-16	1.78817	-3.87428	1	1
Solyc01g104980	SL3.0ch01	93195152	93197152	-	1186	5908	948	5389	16.718	14.96	-1.75859	0.00328591	0.652053	0.901788	0.247553	1
Solyc01g105250	SL3.0ch01	93380157	93382157	-	2149	3467	1865	3210	38.266	36.749	-1.5169	0.0499342	0	-3.91086	1	1
Solyc01g105260	SL3.0ch01	93388013	93390013	-	133	3100	86	3288	4.114	2.549	-1.56492	0.000297882	0	-3.91086	1	1
Solyc01g105410	SL3.0ch01	93480094	93482094	+	1944	6216	1604	6169	23.824	20.636	-3.188	1.34738e-06	0.199034	7.95823	0.697923	1
Solyc01g105450	SL3.0ch01	93514791	93516791	-	1292	9713	1033	8703	11.74	10.61	-1.13001	0.0058237	1.85244	-1.94652	0.24469	1
Solyc01g105495	SL3.0ch01	93538394	93540394	-	43	1818	33	2338	2.311	1.392	-0.918768	0.0138808	0.0614483	2.43838	0.890741	1
Solyc01g105570	SL3.0ch01	93603832	93605832	-	3447	6555	2552	5331	34.463	32.373	-2.08965	0.00200863	0.152422	4.5393	0.603959	1
Solyc01g105600	SL3.0ch01	93621197	93623197	-	41	1542	33	1963	2.59	1.653	-0.936712	0.0281003	1.17031	-0.20496	0.366988	1
Solyc01g105630	SL3.0ch01	93628448	93630448	+	2832	8876	2247	7498	24.189	23.058	-1.13061	0.0257881	1.28275	2.08236	0.231942	1
Solyc01g105720	SL3.0ch01	93679395	93681395	+	1839	10780	1397	9326	14.573	13.028	-1.54519	0.000446672	-0.507304	6.37247	0.136407	1
Solyc01g105750	SL3.0ch01	93701532	93703532	-	119	1080	34	480	9.925	6.615	-3.31015	0.0137954	0	-3.91086	1	1
Solyc01g105760	SL3.0ch01	93701842	93703842	-	147	1182	34	470	11.061	6.746	-4.31492	0.00291565	0	-3.91086	1	1
Solyc01g105850	SL3.0ch01	93770705	93772705	+	4246	7633	3721	7090	35.744	34.419	-1.3251	0.0184478	0	-3.91086	1	1
Solyc01g105880	SL3.0ch01	93788611	93790611	+	5659	7636	4912	7088	42.565	40.933	-1.63154	0.00497074	0.249065	0.386607	0.859279	1
Solyc01g105940	SL3.0ch01	93857173	93859173	+	984	3060	354	2146	24.332	14.16	-10.1723	3.35059e-23	3.48887	-1.69313	0.041785	0.935274
Solyc01g106390	SL3.0ch01	94201939	94203939	-	3778	4294	3312	4017	46.804	45.19	-1.61343	0.022895	0.0441829	6.58918	0.94098	1
Solyc01g106400	SL3.0ch01	94201549	94203549	+	3788	4612	3319	4306	45.095	43.528	-1.56737	0.0229427	-2.18125	-0.268878	0.0146685	0.585563
Solyc01g106590	SL3.0ch01	94304611	94306611	+	36	863	10	460	4.004	2.128	-1.87679	0.0382104	0.109664	3.14228	0.765624	1
Solyc01g106600	SL3.0ch01	94310836	94312836	+	1123	3594	992	3541	23.808	21.884	-1.92354	0.0149824	0	1.64845	1	1
Solyc01g106635	SL3.0ch01	94326948	94328948	-	667	5407	403	4741	10.981	7.834	-3.14686	1.82785e-08	0	-3.91086	1	1
Solyc01g106860	SL3.0ch01	94479454	94481454	+	1202	2382	1070	2380	33.538	31.014	-2.52345	0.012864	0.577997	-2.87868	0.770937	1
Solyc01g106850	SL3.0ch01	94482398	94484398	-	107	743	106	1381	12.588	7.128	-5.45979	1.50119e-05	0	-3.91086	1	1
Solyc01g106870	SL3.0ch01	94482350	94484350	+	107	578	105	1210	15.62	7.985	-7.63565	3.46316e-07	-0.124528	5.04319	0.653107	1
Solyc01g106910	SL3.0ch01	94516451	94518451	-	3131	3416	2343	2984	47.823	43.983	-3.83995	2.48582e-05	-2.00959	-0.888403	0.0275139	0.783115
Solyc01g106940	SL3.0ch01	94527408	94529408	+	683	5274	513	4391	11.466	10.461	-1.00465	0.0444562	0.19461	4.57539	0.549044	1
Solyc01g106980	SL3.0ch01	94577515	94579515	-	1336	8517	501	6644	13.559	7.012	-6.54743	1.90632e-42	-3.92714	-3.66542	0.358036	1
Solyc01g107030	SL3.0ch01	94596564	94598564	+	136	1713	94	1686	7.355	5.281	-2.07443	0.00636398	0	-3.91086	1	1
Solyc01g107130	SL3.0ch01	94638511	94640511	+	3868	4213	3481	4370	47.865	44.338	-3.52706	7.2992e-06	0.135897	7.57145	0.634568	1
Solyc01g107160	SL3.0ch01	94666393	94668393	+	4896	5243	5282	5923	48.289	47.14	-1.14912	0.043504	0.125712	4.86013	0.689008	1
Solyc01g107190	SL3.0ch01	94710829	94712829	+	1288	6277	989	5243	17.026	15.87	-1.15607	0.0327318	0.69327	3.87198	0.107655	1
Solyc01g107215	SL3.0ch01	94745394	94747394	+	34	1350	25	1630	2.457	1.511	-0.946073	0.0310995	0.20606	1.17122	0.679385	1
Solyc01g107220	SL3.0ch01	94751992	94753992	-	56	2195	24	1774	2.488	1.335	-1.15297	0.00495188	0	-3.91086	1	1
Solyc01g107250	SL3.0ch01	94760550	94762550	-	368	5759	300	5451	6.006	5.216	-0.789718	0.0318482	-0.396466	4.47952	0.355772	1
Solyc01g107277	SL3.0ch01	94771890	94773890	-	1856	7567	1559	7495	19.696	17.219	-2.47758	1.27343e-05	4.82521	-2.10723	0.0025505	0.206863
Solyc01g107395	SL3.0ch01	94858169	94860169	+	144	2926	67	2125	4.691	3.057	-1.63398	0.00166905	1.90134	-3.87171	1	1
Solyc01g107430	SL3.0ch01	94891112	94893112	-	55	1282	33	1211	4.114	2.653	-1.46095	0.0245727	0	-3.91086	1	1
Solyc01g107440	SL3.0ch01	94891924	94893924	-	1515	4447	1251	4704	25.411	21.008	-4.40338	1.52674e-08	0	-3.91086	1	1
Solyc01g107590	SL3.0ch01	94983425	94985425	+	5363	8693	4464	8372	38.155	34.777	-3.37734	1.1193e-08	-0.552469	3.90774	0.225519	1
Solyc01g107610	SL3.0ch01	94998539	95000539	+	1213	6371	751	5942	15.994	11.221	-4.77352	2.8333e-16	0.355285	4.34859	0.262825	1
Solyc01g107910	SL3.0ch01	95192129	95194129	-	5164	7353	4476	6945	41.256	39.191	-2.06493	0.000755584	-1.47831	3.98318	0.00959976	0.468437
Solyc01g107961	SL3.0ch01	95235266	95237266	+	2723	9478	2358	9253	22.318	20.308	-2.00951	0.000113854	0	-3.91086	1	1
Solyc01g107990	SL3.0ch01	95274402	95276402	-	6626	7987	4838	7838	45.343	38.167	-7.17657	4.00688e-32	0.0894179	4.06996	0.816369	1
Solyc01g108043	SL3.0ch01	95313394	95315394	+	147	2528	63	2410	5.495	2.548	-2.94781	7.1156e-08	0.403479	-1.63074	0.672353	1
Solyc01g108047	SL3.0ch01	95314040	95316040	+	70	1330	35	1272	5	2.678	-2.32211	0.0011956	0.149178	3.20861	0.768483	1
Solyc01g108060	SL3.0ch01	95328112	95330112	-	1073	2166	1198	2807	33.128	29.913	-3.2149	0.00204524	-0.00319115	0.516332	1	1
Solyc01g108070	SL3.0ch01	95327060	95329060	+	1076	2198	1199	2674	32.865	30.958	-1.90708	0.0407925	-0.382912	2.71472	0.35171	1
Solyc01g108120	SL3.0ch01	95370068	95372068	+	5010	12374	3793	10674	28.82	26.218	-2.60131	2.38415e-07	0.1348	4.22134	0.684059	1
Solyc01g108170	SL3.0ch01	95439252	95441252	-	2069	4044	1273	4342	33.846	22.671	-11.1745	5.23375e-40	-2.055	-2.07715	0.388896	1
Solyc01g108260	SL3.0ch01	95522468	95524468	-	2191	4305	1898	4564	33.728	29.372	-4.35674	1.04311e-07	-0.183243	5.93696	0.556836	1
Solyc01g108390	SL3.0ch01	95600581	95602581	-	2532	5956	1973	5867	29.83	25.166	-4.66453	4.23711e-11	-0.801773	0.246137	0.376685	1
Solyc01g108500	SL3.0ch01	95704702	95706702	-	987	6678	719	5454	12.877	11.647	-1.22922	0.0148049	0.0183025	9.23764	0.948882	1
Solyc01g108510	SL3.0ch01	95714052	95716052	-	7012	24152	5545	21437	22.5	20.551	-1.94958	1.42801e-08	0.260752	6.06112	0.448178	1
Solyc01g108540	SL3.0ch01	95723302	95725302	+	24	896	9	705	2.609	1.261	-1.34819	0.0353128	0.331781	3.55285	0.398032	1
Solyc01g109020	SL3.0ch01	96020568	96022568	-	1840	3421	1180	2841	34.974	29.346	-5.62841	1.09657e-08	1.79879	-3.83693	1	1
Solyc01g109030	SL3.0ch01	96019694	96021694	+	1988	4694	1297	3485	29.752	27.123	-2.62903	0.00137529	0	-3.91086	1	1
Solyc01g109100	SL3.0ch01	96055868	96057868	+	763	11200	516	8853	6.378	5.508	-0.870474	0.00460712	1.47819	-3.05345	0.38643	1
Solyc01g109140	SL3.0ch01	96104945	96106945	+	1691	7526	1459	7334	18.347	16.593	-1.75379	0.0012821	6.69438	3.05954	0.0149794	0.590529
Solyc01g109150	SL3.0ch01	96116671	96118671	+	3429	6091	2519	6387	36.019	28.284	-7.7346	1.93947e-28	0	-2.53314	1	1
Solyc01g109200	SL3.0ch01	96145857	96147857	-	274	2602	58	777	9.527	6.946	-2.58101	0.0119235	0	-3.91086	1	1
Solyc01g109230	SL3.0ch01	96152977	96154977	+	1115	7377	812	6381	13.13	11.289	-1.84125	0.00032787	0.231601	1.25868	0.764746	1
Solyc01g109320	SL3.0ch01	96213628	96215628	-	840	6345	687	6192	11.691	9.987	-1.70411	0.000801032	1.83465	-0.840941	1	1
Solyc01g109370	SL3.0ch01	96258663	96260663	+	5839	9568	4542	8101	37.898	35.925	-1.97334	0.000442419	-0.165138	2.02108	0.786822	1
Solyc01g109390	SL3.0ch01	96274379	96276379	+	3852	5687	4519	7008	40.382	39.204	-1.17798	0.0393868	3.08983	-3.31111	0.456537	1
Solyc01g109440	SL3.0ch01	96303301	96305301	+	1088	9774	695	8191	10.017	7.821	-2.19528	8.51248e-08	0	-3.65395	1	1
Solyc01g109540	SL3.0ch01	96365630	96367630	+	144	2941	113	3148	4.668	3.465	-1.20255	0.00833951	-0.118833	7.6487	0.680835	1
Solyc01g109530	SL3.0ch01	96366154	96368154	+	172	4131	118	3831	3.997	2.988	-1.00911	0.00761355	0	-3.91086	1	1
Solyc01g109600	SL3.0ch01	96410244	96412244	+	4497	8235	3808	8180	35.32	31.765	-3.55535	4.17995e-09	-0.278403	5.91631	0.422198	1
Solyc01g109810	SL3.0ch01	96581392	96583392	+	663	6202	536	5666	9.658	8.642	-1.01531	0.0223301	-0.125753	3.51209	0.844019	1
Solyc01g109930	SL3.0ch01	96674085	96676085	+	234	2218	75	1636	9.543	4.383	-5.15983	2.69614e-10	-0.110699	4.46661	0.720523	1
Solyc01g110000	SL3.0ch01	96738691	96740691	+	1782	7342	1229	6740	19.531	15.422	-4.10865	3.1446e-12	-0.287148	6.11979	0.552068	1
Solyc01g110130	SL3.0ch01	96824652	96826652	-	477	4557	293	3239	9.476	8.296	-1.17998	0.0290092	0.0619116	4.83611	0.887791	1
Solyc01g110150	SL3.0ch01	96844200	96846200	-	132	3701	64	2809	3.444	2.228	-1.21614	0.00201245	0.203553	4.28709	0.57896	1
Solyc01g110190	SL3.0ch01	96874998	96876998	-	1025	7827	624	5464	11.579	10.25	-1.32963	0.00594769	-1.40208	-1.26164	0.321311	1
Solyc01g110240	SL3.0ch01	96894998	96896998	+	213	4204	150	3954	4.822	3.655	-1.16731	0.00475242	0	-3.91086	1	1
Solyc01g110365	SL3.0ch01	97000309	97002309	-	58	866	1	164	6.277	0.606	-5.671	0.0007213	-3.03486	-3.80323	0.522422	1
Solyc01g110510	SL3.0ch01	97103834	97105834	+	72	916	13	723	7.287	1.766	-5.52115	6.18593e-08	0.601223	-0.0298139	0.433537	1
Solyc01g110570	SL3.0ch01	97139713	97141713	-	8253	6777	7425	7729	54.91	48.997	-5.91322	4.44078e-24	-0.429982	-3.20909	1	1
Solyc01g110600	SL3.0ch01	97163884	97165884	+	4555	10220	3385	8873	30.829	27.615	-3.21448	9.00094e-09	1.13878	-1.66518	0.413433	1
Solyc01g110785	SL3.0ch01	97261107	97263107	-	25	848	11	875	2.864	1.242	-1.62215	0.00961273	4.35513	-3.65713	0.29491	1
Solyc01g110790	SL3.0ch01	97261449	97263449	-	22	694	8	807	3.073	0.982	-2.09103	0.00277502	3.59757	-3.45197	0.467607	1
Solyc01g110840	SL3.0ch01	97278407	97280407	+	2477	9223	2176	8780	21.171	19.861	-1.30968	0.00802897	0.302125	-1.84144	0.815617	1
Solyc01g110843	SL3.0ch01	97280817	97282817	-	1607	4224	1682	4872	27.56	25.664	-1.89588	0.00959169	0.168749	-0.674645	0.887761	1
Solyc01g110990	SL3.0ch01	97326483	97328483	+	992	2110	1021	2529	31.979	28.761	-3.2188	0.00269028	0.476149	5.026	0.126766	1
Solyc01g111020	SL3.0ch01	97354556	97356556	-	6587	16283	5755	15239	28.802	27.413	-1.38933	0.000792212	-0.697476	5.81617	0.0208408	0.682632
Solyc01g111110	SL3.0ch01	97402047	97404047	+	4330	5849	3908	5620	42.539	41.016	-1.52261	0.0159219	0.414625	3.70986	0.464908	1
Solyc01g111190	SL3.0ch01	97442867	97444867	+	5466	8752	4622	7889	38.444	36.943	-1.50074	0.00651401	-0.116754	3.10559	0.768255	1
Solyc01g111210	SL3.0ch01	97453622	97455622	+	511	5315	304	4940	8.771	5.797	-2.97392	2.62133e-09	-1.70204	2.31792	0.00774456	0.418724
Solyc01g111230	SL3.0ch01	97464217	97466217	+	4414	7407	3731	7168	37.34	34.232	-3.10783	1.04086e-06	0.0282057	5.87202	0.963973	1
Solyc01g111270	SL3.0ch01	97492717	97494717	+	3155	3800	2473	3470	45.363	41.612	-3.75107	1.5672e-05	0.89068	5.43347	0.0384749	0.910767
Solyc01g111360	SL3.0ch01	97548054	97550054	+	975	8952	616	7068	9.822	8.017	-1.80504	2.78476e-05	-0.0226673	5.04912	0.945453	1
Solyc01g111430	SL3.0ch01	97594119	97596119	-	413	1863	94	805	18.146	10.456	-7.68981	5.41836e-08	-0.198134	0.74134	0.777375	1
Solyc01g111455	SL3.0ch01	97605299	97607299	-	23	904	2	494	2.481	0.403	-2.0779	0.00168165	0.189638	1.58275	0.689564	1
Solyc01g111460	SL3.0ch01	97606609	97608609	-	24	920	9	947	2.542	0.941	-1.60095	0.0045766	0.207185	0.971435	0.69392	1
Solyc01g111610	SL3.0ch01	97744325	97746325	+	366	5620	241	4740	6.114	4.838	-1.27588	0.00225461	0.181577	0.13287	0.826523	1
Solyc01g111680	SL3.0ch01	97791756	97793756	-	83	2678	59	2786	3.006	2.074	-0.932343	0.0139862	0.131351	4.93483	0.658077	1
Solyc01g111690	SL3.0ch01	97793493	97795493	+	474	9440	286	9802	4.781	2.835	-1.94607	1.02197e-12	-0.0966175	3.44155	0.772685	1
Solyc01g111820	SL3.0ch01	97893374	97895374	+	547	8119	325	7809	6.312	3.996	-2.31645	1.97947e-11	0	-3.7556	1	1
Solyc01g111870	SL3.0ch01	97953052	97955052	-	3235	8391	2829	8298	27.826	25.425	-2.40092	3.31566e-05	-0.259218	1.52571	0.619813	1
Solyc01g111890	SL3.0ch01	97977788	97979788	-	1404	6775	1092	5842	17.166	15.748	-1.41743	0.0104469	0.0507797	5.39439	0.861156	1
Solyc01g111920	SL3.0ch01	97995256	97997256	+	2594	3346	1864	2756	43.67	40.346	-3.32371	0.00042595	0.00230457	5.54365	0.994402	1
Solyc01g112070	SL3.0ch01	98097506	98099506	-	1132	5748	886	5263	16.453	14.409	-2.04464	0.000869772	0.895109	1.01274	0.375733	1
Solyc01g112150	SL3.0ch01	98144638	98146638	-	277	3684	175	2966	6.993	5.571	-1.42171	0.00878352	0.0412396	5.77666	0.875373	1
Solyc01g112230	SL3.0ch01	98190390	98192390	-	2307	3113	2237	3605	42.565	38.292	-4.27289	3.52771e-06	-0.470601	1.0446	0.614321	1
Solyc01g112240	SL3.0ch01	98192204	98194204	-	106	1981	52	1589	5.079	3.169	-1.91026	0.00242426	0.0644189	3.75565	0.838753	1
Solyc01g112270	SL3.0ch01	98256766	98258766	-	4	220	1	477	1.786	0.209	-1.57651	0.0190584	0.00535953	-2.35083	1	1
Solyc01g112320	SL3.0ch01	98326133	98328133	-	3078	5600	1949	3829	35.469	33.731	-1.73761	0.0164428	-0.0042987	5.10986	0.98999	1
Solyc02g044045	SL3.0ch02	152496	154496	+	975	4276	728	3660	18.568	16.591	-1.97719	0.00643461	0	-3.91086	1	1
Solyc02g043990	SL3.0ch02	235829	237829	+	265	7860	165	6734	3.262	2.392	-0.869887	0.00089528	0	-3.91086	1	1
Solyc02g043940	SL3.0ch02	647993	649993	-	1196	6816	1088	7120	14.928	13.255	-1.67225	0.00141962	0	-3.7647	1	1
Solyc02g055565	SL3.0ch02	2234518	2236518	+	10332	8614	9164	8095	54.534	53.097	-1.437	0.00360855	0.271959	3.64097	0.422605	1
Solyc02g055390	SL3.0ch02	3133003	3135003	+	2519	6102	1876	4829	29.219	27.979	-1.24023	0.043487	1.27253	-3.31633	0.647654	1
Solyc02g050205	SL3.0ch02	4550667	4552667	+	5597	9485	4686	8453	37.11	35.665	-1.44565	0.00650405	0.354488	3.78592	0.379608	1
Solyc02g050290	SL3.0ch02	4966375	4968375	-	1376	8885	1053	8226	13.41	11.348	-2.06179	1.06414e-05	0	-3.91086	1	1
Solyc02g005200	SL3.0ch02	7479846	7481846	-	4596	8726	4249	8502	34.499	33.323	-1.17645	0.022357	-0.643555	6.61051	0.0696869	1
Solyc02g005410	SL3.0ch02	8621839	8623839	-	1869	7947	1014	7542	19.04	11.851	-7.18901	3.7626e-40	0	-3.91086	1	1
Solyc02g005430	SL3.0ch02	9018072	9020072	+	2040	7311	1432	5848	21.816	19.67	-2.14552	0.000505456	0	-3.91086	1	1
Solyc02g005490	SL3.0ch02	9306619	9308619	-	743	8586	653	8348	7.964	7.255	-0.709663	0.0334083	0	-1.17389	1	1
Solyc02g014150	SL3.0ch02	15676471	15678471	+	1664	6496	1379	5910	20.392	18.919	-1.47324	0.0115406	-0.415498	5.40183	0.172135	1
Solyc02g014405	SL3.0ch02	16725896	16727896	+	1666	5273	1317	4491	24.009	22.676	-1.3336	0.0365775	0	-3.91086	1	1
Solyc02g014830	SL3.0ch02	19115380	19117380	-	1037	3850	864	3715	21.22	18.869	-2.35081	0.00258576	-0.772464	-3.56723	1	1
Solyc02g014840	SL3.0ch02	19143831	19145831	+	538	2525	155	1494	17.564	9.4	-8.16484	1.86655e-14	0.125616	3.1475	0.813096	1
Solyc02g014843	SL3.0ch02	19186284	19188284	+	5517	10835	3441	10383	33.739	24.891	-8.8475	7.50486e-62	-5.96705	-3.04292	0.00237281	0.196006
Solyc02g020890	SL3.0ch02	20763292	20765292	+	2474	3602	2381	3767	40.718	38.728	-1.98954	0.0130967	-0.231732	5.31437	0.703667	1
Solyc02g021050	SL3.0ch02	21880615	21882615	-	423	7448	219	6060	5.374	3.488	-1.88634	7.93177e-08	-0.0994027	4.74956	0.769507	1
Solyc02g021410	SL3.0ch02	23096183	23098183	+	40	1086	14	853	3.552	1.615	-1.93763	0.0045517	-0.399992	-3.02546	0.920478	1
Solyc02g021450	SL3.0ch02	23239759	23241759	+	2150	8370	1146	8722	20.437	11.613	-8.82397	7.91888e-65	0	-3.91086	1	1
Solyc02g021630	SL3.0ch02	23802646	23804646	+	2509	4895	1546	5193	33.887	22.941	-10.946	7.92255e-46	-1.761	-1.96348	0.269057	1
Solyc02g021650	SL3.0ch02	23867231	23869231	-	5802	7480	4762	6475	43.683	42.378	-1.30532	0.0203503	0.0169287	6.59258	0.953546	1
Solyc02g021670	SL3.0ch02	23972136	23974136	+	416	2542	179	1488	14.064	10.738	-3.3257	0.000744383	1.23788	-2.64753	0.400167	1
Solyc02g022890	SL3.0ch02	24859150	24861150	+	2178	7590	1265	5063	22.297	19.991	-2.30678	0.000337438	3.77868	-0.0202057	0.00328893	0.243056
Solyc02g022910	SL3.0ch02	24879081	24881081	+	558	4867	498	5141	10.286	8.831	-1.45436	0.00535679	0	-3.91086	1	1
Solyc02g023940	SL3.0ch02	25026697	25028697	-	1086	9701	923	9665	10.068	8.717	-1.35026	0.000487809	0	-3.91086	1	1
Solyc02g023990	SL3.0ch02	25170245	25172245	+	6648	5944	5657	6054	52.795	48.305	-4.49041	4.8686e-12	-0.441354	0.875364	0.607686	1
Solyc02g030180	SL3.0ch02	25742641	25744641	+	1629	6722	1360	6103	19.507	18.223	-1.28341	0.0199172	0	-3.91086	1	1
Solyc02g030215	SL3.0ch02	25804382	25806382	+	966	2909	959	3357	24.929	22.22	-2.70938	0.00242732	-0.264881	-1.9138	0.933116	1
Solyc02g030360	SL3.0ch02	26015699	26017699	+	1286	4575	1095	4279	21.942	20.376	-1.56576	0.0219398	-0.422849	-0.507351	0.504252	1
Solyc02g030470	SL3.0ch02	26471944	26473944	+	561	2466	496	2659	18.533	15.721	-2.81212	0.00217997	0	-3.91086	1	1
Solyc02g030510	SL3.0ch02	26761625	26763625	+	2496	4523	2113	4123	35.561	33.884	-1.67672	0.0219729	-4.12052	-3.56247	0.148689	1
Solyc02g030505	SL3.0ch02	26761658	26763658	+	2474	4395	2063	3961	36.017	34.246	-1.77054	0.0184478	0.24708	-2.31629	0.88303	1
Solyc02g030650	SL3.0ch02	27095192	27097192	+	1027	8328	734	7099	10.978	9.371	-1.60748	0.000365136	0	-3.91086	1	1
Solyc02g031680	SL3.0ch02	27207105	27209105	-	78	2938	50	2811	2.586	1.748	-0.838566	0.0160629	0	-3.91086	1	1
Solyc02g031820	SL3.0ch02	27493717	27495717	-	2348	7333	1846	6304	24.254	22.65	-1.60339	0.00681499	0	-3.91086	1	1
Solyc02g032080	SL3.0ch02	27925744	27927744	+	2003	4232	1486	4099	32.125	26.607	-5.51812	7.78881e-11	-0.919551	-3.66338	1	1
Solyc02g032090	SL3.0ch02	27937575	27939575	-	895	1492	918	2259	37.495	28.895	-8.59958	2.52445e-11	0	-3.91086	1	1
Solyc02g032250	SL3.0ch02	28537743	28539743	-	921	9916	542	6759	8.499	7.424	-1.07502	0.00540285	0	-3.91086	1	1
Solyc02g032290	SL3.0ch02	28584250	28586250	+	6957	11097	3870	7058	38.534	35.414	-3.12078	1.08265e-07	0	-3.91086	1	1
Solyc02g032333	SL3.0ch02	28722619	28724619	+	42	2187	10	1066	1.884	0.929	-0.954885	0.0188303	0	-3.91086	1	1
Solyc02g032360	SL3.0ch02	28840102	28842102	-	504	4067	298	2931	11.026	9.229	-1.79717	0.00558957	0.223182	-2.08878	0.87332	1
Solyc02g032410	SL3.0ch02	28930560	28932560	-	2410	8679	1421	6394	21.733	18.183	-3.55027	2.66796e-09	0.460535	-2.6647	0.759509	1
Solyc02g032460	SL3.0ch02	28986711	28988711	-	47	1681	26	2125	2.72	1.209	-1.51117	0.000506389	0.585291	1.69982	0.36265	1
Solyc02g032670	SL3.0ch02	29441374	29443374	-	1210	7354	1058	7647	14.129	12.154	-1.97498	9.42289e-05	0	-3.91086	1	1
Solyc02g032810	SL3.0ch02	29842011	29844011	-	2050	8455	1614	7357	19.515	17.991	-1.52321	0.00391625	0	-3.83477	1	1
Solyc02g032830	SL3.0ch02	29862836	29864836	-	3593	8217	3376	8264	30.423	29.003	-1.41993	0.0094153	2.62984	-3.83616	0.5864	1
Solyc02g032840	SL3.0ch02	29879984	29881984	-	5597	9433	3921	7494	37.239	34.35	-2.88932	1.16831e-06	-1.75006	-1.00448	0.174286	1
Solyc02g033020	SL3.0ch02	30102326	30104326	+	1549	10248	1134	8561	13.13	11.697	-1.43371	0.00102125	0	-3.91086	1	1
Solyc02g033040	SL3.0ch02	30182330	30184330	+	4419	6542	3516	5823	40.316	37.649	-2.66709	7.76286e-05	0.851454	-0.576916	0.280668	1
Solyc02g036170	SL3.0ch02	30675635	30677635	-	450	3437	427	3687	11.577	10.379	-1.19786	0.042786	0	-3.91086	1	1
Solyc02g036160	SL3.0ch02	30670037	30672037	+	1236	4382	913	3645	22.001	20.031	-1.97	0.00839986	0	-3.91086	1	1
Solyc02g036280	SL3.0ch02	30960192	30962192	+	181	1708	80	1136	9.582	6.579	-3.00284	0.00209148	0.240332	-0.0953474	0.697034	1
Solyc02g038650	SL3.0ch02	31714698	31716698	+	1865	5160	1448	4425	26.548	24.655	-1.89284	0.00776675	0	-3.91086	1	1
Solyc02g038720	SL3.0ch02	31917144	31919144	-	1445	6030	1195	5470	19.331	17.929	-1.40162	0.0172461	0	-3.91086	1	1
Solyc00g007450	SL3.0ch02	32299960	32301960	+	1799	11147	1374	9369	13.896	12.79	-1.10646	0.00730863	0	-3.91086	1	1
Solyc00g007010	SL3.0ch02	32820702	32822702	+	4692	9997	3386	8468	31.942	28.564	-3.37807	3.5141e-09	-0.270765	4.40867	0.355114	1
Solyc02g060590	SL3.0ch02	33596779	33598779	-	472	6612	348	5907	6.663	5.564	-1.09935	0.00470952	0	-3.91086	1	1
Solyc02g060600	SL3.0ch02	33617910	33619910	-	501	7544	367	6695	6.227	5.197	-1.03064	0.00396948	0	-3.91086	1	1
Solyc02g061660	SL3.0ch02	33709435	33711435	-	376	2664	211	2334	12.368	8.291	-4.07765	6.78199e-07	0	-3.91086	1	1
Solyc02g061820	SL3.0ch02	33893258	33895258	-	558	1250	299	1007	30.863	22.894	-7.9685	8.16671e-07	-0.237676	4.59001	0.431809	1
Solyc02g061940	SL3.0ch02	34036306	34038306	-	324	1887	266	2424	14.654	9.888	-4.76553	3.73327e-07	0.189148	2.42851	0.656529	1
Solyc02g061955	SL3.0ch02	34035700	34037700	+	336	2519	289	2682	11.769	9.727	-2.04146	0.00681607	0	-3.79772	1	1
Solyc02g061980	SL3.0ch02	34061227	34063227	+	3291	8936	2658	8673	26.916	23.458	-3.45807	1.45181e-09	0.18706	6.40189	0.485712	1
Solyc02g062070	SL3.0ch02	34192800	34194800	+	2952	6232	2713	6316	32.143	30.048	-2.09523	0.00144929	0	-3.91086	1	1
Solyc02g062140	SL3.0ch02	34253891	34255891	-	2564	10488	2232	9670	19.644	18.753	-0.891348	0.0362156	-0.255287	5.68631	0.330247	1
Solyc02g062250	SL3.0ch02	34393472	34395472	+	83	2338	37	1725	3.428	2.1	-1.32845	0.00618114	0.0758319	5.21884	0.795467	1
Solyc02g062560	SL3.0ch02	34831522	34833522	-	6718	9746	5008	8157	40.804	38.04	-2.76392	1.28816e-06	-1.84909	1.15717	0.00772246	0.41851
Solyc02g062590	SL3.0ch02	34857393	34859393	-	1941	9672	1597	9053	16.714	14.995	-1.71872	0.000312796	-2.65321	-3.3412	0.188877	1
Solyc02g062610	SL3.0ch02	34876894	34878894	-	2699	8673	2262	8475	23.734	21.067	-2.66639	1.94756e-06	-0.899805	2.32769	0.0297764	0.807559
Solyc02g094755	SL3.0ch02	35014112	35016112	+	2987	5900	2473	5267	33.611	31.951	-1.65999	0.0121613	3.49313	-3.08582	0.323593	1
Solyc02g062800	SL3.0ch02	35127081	35129081	-	289	5185	204	5112	5.28	3.837	-1.44203	0.000260299	0.430209	4.16484	0.351397	1
Solyc02g062830	SL3.0ch02	35208234	35210234	+	951	4566	510	3166	17.238	13.874	-3.36385	1.18425e-05	0	-3.6388	1	1
Solyc02g062860	SL3.0ch02	35342164	35344164	-	2069	7856	1692	8179	20.846	17.141	-3.70523	5.01402e-11	0	-3.91086	1	1
Solyc02g063100	SL3.0ch02	35711354	35713354	-	461	753	1	268	37.974	0.372	-37.6019	2.60195e-46	0	-3.83186	1	1
Solyc02g063110	SL3.0ch02	35711930	35713930	-	20	616	2	386	3.145	0.515	-2.62919	0.00208027	0	-3.91086	1	1
Solyc02g063125	SL3.0ch02	35711806	35713806	+	163	694	2	386	19.02	0.515	-18.5044	2.68929e-25	0	-3.76338	1	1
Solyc02g063210	SL3.0ch02	35813730	35815730	-	764	4434	456	3491	14.698	11.553	-3.14488	9.90449e-06	-3.61567	-3.72598	0.414927	1
Solyc02g063500	SL3.0ch02	36130354	36132354	+	2211	6826	1780	6119	24.466	22.534	-1.93159	0.00197786	0	-3.91086	1	1
Solyc02g064550	SL3.0ch02	36242720	36244720	-	1155	3983	994	4402	22.48	18.421	-4.05851	2.60129e-07	-0.260773	4.75416	0.355341	1
Solyc02g064570	SL3.0ch02	36248298	36250298	-	2219	9479	2029	9665	18.969	17.351	-1.61828	0.000860461	0	-3.8303	1	1
Solyc02g064765	SL3.0ch02	36425635	36427635	+	3119	5518	2976	5554	36.112	34.889	-1.22345	0.0434578	0	-3.91086	1	1
Solyc02g064770	SL3.0ch02	36446337	36448337	+	3223	9131	2614	8220	26.089	24.128	-1.96097	0.000409819	-2.32432	-0.204043	0.0532089	1
Solyc02g064790	SL3.0ch02	36467735	36469735	-	3678	10051	3032	8791	26.79	25.645	-1.14508	0.0193567	0	-3.91086	1	1
Solyc02g064850	SL3.0ch02	36542771	36544771	-	2296	8262	1851	7438	21.747	19.927	-1.81975	0.00109006	0	-3.91086	1	1
Solyc02g064910	SL3.0ch02	36577004	36579004	+	5556	7493	4330	7854	42.578	35.538	-7.03956	1.7474e-29	0	-3.91086	1	1
Solyc02g064920	SL3.0ch02	36585452	36587452	-	3505	5114	3196	5075	40.666	38.641	-2.02494	0.00424833	0	-3.91086	1	1
Solyc02g064955	SL3.0ch02	36616977	36618977	-	2854	6260	2281	5776	31.314	28.311	-3.00368	1.45658e-05	0	-3.91086	1	1
Solyc02g064990	SL3.0ch02	36690113	36692113	-	3836	8073	3198	7747	32.211	29.219	-2.99211	9.5598e-07	0.245586	3.65387	0.49228	1
Solyc02g065210	SL3.0ch02	36954260	36956260	-	2008	3200	1901	3287	38.556	36.642	-1.91382	0.0222219	0	-3.91086	1	1
Solyc02g065270	SL3.0ch02	37007482	37009482	+	1459	2791	955	2204	34.329	30.231	-4.09833	0.000148876	0	-2.39494	1	1
Solyc02g065290	SL3.0ch02	37017875	37019875	-	928	7101	711	6025	11.558	10.555	-1.00288	0.0266455	-0.414581	-0.471652	0.640325	1
Solyc02g065320	SL3.0ch02	37060876	37062876	+	202	710	103	999	22.149	9.347	-12.8025	3.90701e-15	-3.12474	-2.76245	0.140764	1
Solyc02g094758	SL3.0ch02	37061935	37063935	+	225	1301	109	1117	14.744	8.891	-5.85373	2.25088e-06	-3.68916	-2.83909	0.405623	1
Solyc02g065490	SL3.0ch02	37218716	37220716	-	1973	6740	1614	5865	22.644	21.58	-1.0639	0.0487169	-5.07249	-2.01211	0.0260792	0.766807
Solyc02g065560	SL3.0ch02	37285760	37287760	+	2969	8902	2100	6878	25.011	23.391	-1.62002	0.00406909	0.627299	2.67908	0.178164	1
Solyc02g065600	SL3.0ch02	37333459	37335459	-	1522	8280	1234	8037	15.527	13.31	-2.21712	1.14358e-05	-1.53933	-2.02729	0.1259	1
Solyc02g065640	SL3.0ch02	37364776	37366776	+	3167	8664	2781	8102	26.769	25.554	-1.21504	0.0192563	0	-3.91086	1	1
Solyc02g065680	SL3.0ch02	37407371	37409371	+	7289	9823	6485	9401	42.596	40.822	-1.77373	0.000716168	-0.52795	7.06401	0.104683	1
Solyc02g065730	SL3.0ch02	37453984	37455984	-	4854	8863	3820	7848	35.387	32.739	-2.64763	7.84603e-06	0	-3.91086	1	1
Solyc02g065740	SL3.0ch02	37461021	37463021	-	1778	7227	1772	7695	19.745	18.718	-1.02694	0.0371635	1.90131	-3.87171	1	1
Solyc02g066830	SL3.0ch02	37545133	37547133	+	1048	5233	834	4868	16.685	14.626	-2.05879	0.00123825	0.113853	3.9194	0.77778	1
Solyc02g066960	SL3.0ch02	37778692	37780692	+	765	2976	624	2816	20.449	18.14	-2.30954	0.00768183	-3.00007	-3.21994	0.328783	1
Solyc02g067030	SL3.0ch02	37841247	37843247	-	2034	9851	1629	9305	17.114	14.898	-2.21553	4.70444e-06	0.15013	5.07319	0.631121	1
Solyc02g067180	SL3.0ch02	37936940	37938940	-	6001	6905	5756	7192	46.498	44.455	-2.04301	0.00063633	-0.155006	8.57466	0.625709	1
Solyc02g067320	SL3.0ch02	38095466	38097466	-	1473	5109	1505	5617	22.379	21.132	-1.24751	0.0367381	-0.92864	1.06711	0.287985	1
Solyc02g067330	SL3.0ch02	38095466	38097466	-	1473	5109	1505	5617	22.379	21.132	-1.24751	0.0367381	0	-3.91086	1	1
Solyc02g067380	SL3.0ch02	38148388	38150388	+	2269	5586	1618	5705	28.886	22.095	-6.79129	3.42882e-21	-1.42537	-1.75279	0.178042	1
Solyc02g067420	SL3.0ch02	38177052	38179052	-	4490	10166	3767	9110	30.636	29.254	-1.38221	0.00695501	0.0998818	5.27385	0.72478	1
Solyc02g067510	SL3.0ch02	38252770	38254770	+	3571	8314	3484	8695	30.046	28.607	-1.43966	0.00773189	1.76389	-1.14196	0.14683	1
Solyc02g067620	SL3.0ch02	38321925	38323925	-	1180	6416	831	6029	15.534	12.114	-3.42079	3.43267e-09	0.662756	4.40241	0.0480568	0.994919
Solyc02g067630	SL3.0ch02	38329775	38331775	+	3351	3982	2954	3864	45.698	43.326	-2.37104	0.00276369	0	-3.91086	1	1
Solyc02g067640	SL3.0ch02	38335383	38337383	+	596	1539	379	1677	27.916	18.434	-9.48184	7.28816e-13	0	-3.60824	1	1
Solyc02g067670	SL3.0ch02	38368483	38370483	+	274	1968	11	525	12.221	2.052	-10.169	3.68541e-15	0.0432396	5.85401	0.883037	1
Solyc02g067810	SL3.0ch02	38490263	38492263	+	1033	9155	775	8256	10.139	8.582	-1.55783	0.000160595	0.775509	0.00787978	0.491555	1
Solyc02g067890	SL3.0ch02	38551720	38553720	-	2533	8348	2068	7814	23.279	20.927	-2.35217	3.72604e-05	0.00971685	5.38087	0.974824	1
Solyc02g068160	SL3.0ch02	38762290	38764290	-	3190	6485	2378	6088	32.972	28.089	-4.88275	1.97e-12	-0.453876	-1.96967	0.691358	1
Solyc02g068370	SL3.0ch02	38890071	38892071	+	2924	3759	2899	4295	43.753	40.297	-3.45534	3.05943e-05	0.34004	4.62995	0.306603	1
Solyc02g068470	SL3.0ch02	38980727	38982727	-	3397	8119	2739	8438	29.498	24.506	-4.99241	6.99507e-17	5.07566	-0.291293	0.0141481	0.57825
Solyc02g068680	SL3.0ch02	39190314	39192314	+	3344	8285	2368	6206	28.756	27.618	-1.13732	0.0361505	0.627936	5.02217	0.483478	1
Solyc02g069070	SL3.0ch02	39611427	39613427	-	1039	3388	1040	4125	23.47	20.136	-3.33409	6.45947e-05	0.173919	2.18578	0.736598	1
Solyc02g069240	SL3.0ch02	39751780	39753780	-	305	10298	218	9398	2.877	2.267	-0.609489	0.00387275	-0.746827	4.30647	0.0496144	1
Solyc02g069400	SL3.0ch02	39869785	39871785	+	6946	8721	6255	8246	44.335	43.135	-1.20027	0.0183587	0.150845	3.82633	0.66553	1
Solyc02g069470	SL3.0ch02	39914856	39916856	-	3391	9578	3292	9745	26.147	25.251	-0.895758	0.045821	0.194427	4.95653	0.552402	1
Solyc02g069490	SL3.0ch02	39928562	39930562	-	571	8052	458	7853	6.622	5.511	-1.11106	0.00152729	-0.975389	-0.32853	0.453085	1
Solyc02g069600	SL3.0ch02	40013734	40015734	-	4025	9049	2763	6647	30.786	29.362	-1.42391	0.0117499	-0.814216	-1.55705	0.556775	1
Solyc02g069740	SL3.0ch02	40114886	40116886	+	919	11216	669	9434	7.573	6.622	-0.95134	0.00348556	-0.536766	-2.75961	0.809099	1
Solyc02g069950	SL3.0ch02	40295935	40297935	+	4878	11303	3237	9405	30.146	25.605	-4.54134	4.60624e-17	0.0550682	7.20474	0.823282	1
Solyc02g070180	SL3.0ch02	40533267	40535267	-	6487	8679	5000	7473	42.773	40.087	-2.68672	5.84258e-06	2.25796	-0.567037	0.185663	1
Solyc02g070190	SL3.0ch02	40535963	40537963	-	1055	3101	840	3229	25.385	20.644	-4.74109	3.71009e-07	0	-3.91086	1	1
Solyc02g070310	SL3.0ch02	40662617	40664617	-	2623	7858	1331	5100	25.026	20.697	-4.32961	1.36804e-10	0.0786002	9.35392	0.794033	1
Solyc02g070420	SL3.0ch02	40711836	40713836	-	603	8501	491	8084	6.623	5.726	-0.897515	0.00739241	0.0277281	-0.261442	0.981247	1
Solyc02g070480	SL3.0ch02	40787291	40789291	+	5383	7437	4343	7148	41.989	37.795	-4.19428	4.23613e-11	0.150003	3.84979	0.706777	1
Solyc02g070483	SL3.0ch02	40788231	40790231	+	4751	4828	3822	4172	49.598	47.811	-1.78722	0.00997321	-0.011428	3.57696	0.976218	1
Solyc02g070520	SL3.0ch02	40818103	40820103	+	5528	6258	4901	6112	46.903	44.502	-2.40115	0.000198586	0.322136	4.85629	0.325883	1
Solyc02g070570	SL3.0ch02	40869633	40871633	+	210	1702	163	2221	10.983	6.837	-4.14602	1.79885e-06	0.206528	8.66759	0.495539	1
Solyc02g070650	SL3.0ch02	40900084	40902084	+	607	1637	525	2303	27.05	18.564	-8.48555	1.28906e-12	0.163748	7.19389	0.629062	1
Solyc02g070660	SL3.0ch02	40902635	40904635	+	4	117	8	1115	3.306	0.712	-2.59341	0.0118769	-1.89335	-2.94012	0.41833	1
Solyc02g070760	SL3.0ch02	40949794	40951794	-	599	4131	449	3927	12.664	10.261	-2.40334	0.000235835	-0.908082	2.07981	0.0485476	0.997644
Solyc02g070800	SL3.0ch02	40975015	40977015	-	244	1134	97	609	17.707	13.739	-3.96744	0.0108775	-0.877661	-0.0859586	0.201297	1
Solyc02g070850	SL3.0ch02	41001625	41003625	+	1673	4760	1181	4270	26.007	21.666	-4.34078	3.85018e-08	0.236254	0.311273	0.690259	1
Solyc02g070920	SL3.0ch02	41070017	41072017	-	596	1044	717	1633	36.341	30.511	-5.83083	9.26831e-05	-0.179091	-1.18514	0.898822	1
Solyc02g070890	SL3.0ch02	41054265	41056265	+	1456	5702	1165	5020	20.341	18.836	-1.50498	0.0155628	0.606118	4.9474	0.275368	1
Solyc02g070980	SL3.0ch02	41080810	41082810	+	78	1679	6	270	4.439	2.174	-2.26547	0.0465682	-3.87142	0.301856	0.000881248	0.0978897
Solyc02g071000	SL3.0ch02	41085549	41087549	+	158	2536	42	1412	5.865	2.889	-2.9763	1.08163e-05	-4.81553	-0.910736	0.00147445	0.1437
Solyc02g071060	SL3.0ch02	41119078	41121078	-	1988	7811	1668	7550	20.288	18.095	-2.19275	9.47486e-05	-0.0607063	0.997371	0.946055	1
Solyc02g071080	SL3.0ch02	41142703	41144703	-	1931	8978	1709	8626	17.701	16.536	-1.16494	0.0129796	0.977229	6.64659	0.089207	1
Solyc02g071100	SL3.0ch02	41152758	41154758	-	3732	8864	3297	8865	29.628	27.109	-2.51943	9.76833e-06	-0.142655	3.20226	0.812223	1
Solyc02g071130	SL3.0ch02	41180342	41182342	-	1306	8690	962	7534	13.065	11.323	-1.74225	0.000223095	3.12234	0.58249	0.0664308	1
Solyc02g071270	SL3.0ch02	41328603	41330603	-	2075	6323	2088	6847	24.708	23.369	-1.33949	0.0203043	0.0566538	5.56115	0.864089	1
Solyc02g071285	SL3.0ch02	41347199	41349199	+	5039	8607	3424	6440	36.927	34.712	-2.21449	0.000337496	-0.179047	4.42385	0.653254	1
Solyc02g071587	SL3.0ch02	41554898	41556898	-	22	1033	5	549	2.085	0.903	-1.18278	0.0464999	-1.06055	-3.12449	0.648514	1
Solyc02g071595	SL3.0ch02	41567203	41569203	-	455	3535	212	3083	11.404	6.434	-4.96952	2.92762e-13	1.78822	-3.87428	1	1
Solyc02g071690	SL3.0ch02	41622175	41624175	+	676	4299	526	4296	13.588	10.908	-2.6796	4.18854e-05	-3.92584	-3.59898	0.370951	1
Solyc02g071810	SL3.0ch02	41731887	41733887	-	36	1288	0	204	2.719	0	-2.71903	0.00586893	-1.48261	1.10037	0.115494	1
Solyc02g071850	SL3.0ch02	41773962	41775962	-	36	485	2	120	6.91	1.639	-5.27044	0.0154396	0	-3.91086	1	1
Solyc02g072010	SL3.0ch02	41894205	41896205	+	36	2057	17	1952	1.72	0.863	-0.856637	0.00969009	-0.0528574	-0.0727698	0.940724	1
Solyc02g072140	SL3.0ch02	41992790	41994790	+	901	9006	755	8563	9.095	8.103	-0.991982	0.00786399	-1.04548	-0.0637429	0.172818	1
Solyc02g072170	SL3.0ch02	42059490	42061490	-	2077	7547	1608	6705	21.581	19.343	-2.23827	0.000161407	-0.114439	1.6577	0.850244	1
Solyc02g072305	SL3.0ch02	42157758	42159758	+	14	910	7	1086	1.515	0.64	-0.874712	0.0359037	-0.0313244	4.80314	0.913165	1
Solyc02g072490	SL3.0ch02	42243957	42245957	+	794	982	143	235	44.707	37.831	-6.87652	0.00875095	0	-3.91086	1	1
Solyc02g076695	SL3.0ch02	42406225	42408225	-	6	198	2	275	2.941	0.722	-2.21915	0.0360279	0.0700533	-1.16079	0.933958	1
Solyc02g076750	SL3.0ch02	42428238	42430238	-	5881	7964	4725	7140	42.477	39.823	-2.65442	1.36312e-05	-0.0233234	0.712215	0.992111	1
Solyc02g076820	SL3.0ch02	42507194	42509194	+	2228	9029	1871	8474	19.792	18.086	-1.7061	0.000889011	0.417332	7.60837	0.170974	1
Solyc02g076900	SL3.0ch02	42582188	42584188	-	130	5009	103	5058	2.53	1.996	-0.533938	0.0347818	0.269711	2.13614	0.566214	1
Solyc02g076980	SL3.0ch02	42631971	42633971	+	1862	8865	1471	7698	17.358	16.043	-1.31488	0.00724006	0.526455	0.2802	0.636725	1
Solyc02g077030	SL3.0ch02	42671786	42673786	+	549	2119	223	1088	20.577	17.01	-3.5673	0.00411673	-1.72854	-2.77402	0.243214	1
Solyc02g077130	SL3.0ch02	42748543	42750543	-	4676	8980	4165	8356	34.241	33.264	-0.977243	0.0445521	-0.36084	-2.59595	0.879172	1
Solyc02g077190	SL3.0ch02	42748300	42750300	+	4620	8067	4138	8036	36.415	33.99	-2.42476	4.9086e-05	-0.0162804	0.89277	0.986077	1
Solyc02g077150	SL3.0ch02	42753814	42755814	-	381	7848	290	8073	4.63	3.468	-1.16231	0.000111099	0	-3.91086	1	1
Solyc02g077220	SL3.0ch02	42789589	42791589	-	3675	7430	3272	7228	33.093	31.162	-1.9313	0.00149749	-1.4394	1.72668	0.0286013	0.794866
Solyc02g077230	SL3.0ch02	42789542	42791542	+	3672	7486	3256	7330	32.909	30.758	-2.15152	0.000461169	-0.527278	0.495622	0.475237	1
Solyc02g077290	SL3.0ch02	42837051	42839051	+	443	3289	414	3614	11.87	10.278	-1.59226	0.0139064	2.88747	-0.811309	0.134737	1
Solyc02g077340	SL3.0ch02	42876922	42878922	-	3413	6841	2411	5091	33.285	32.138	-1.14648	0.0497509	0	-3.91086	1	1
Solyc02g077360	SL3.0ch02	42883145	42885145	+	293	7931	178	6454	3.563	2.684	-0.878787	0.00155856	0	-3.68051	1	1
Solyc02g077420	SL3.0ch02	42929949	42931949	-	90	1513	30	1115	5.614	2.62	-2.99439	9.88215e-05	-0.92501	-3.76322	1	1
Solyc02g077500	SL3.0ch02	42978099	42980099	-	32	1339	15	1161	2.334	1.276	-1.05855	0.026555	3.01098	-3.80407	0.520617	1
Solyc02g077520	SL3.0ch02	42983527	42985527	+	2296	6236	1718	5741	26.91	23.033	-3.87788	2.08286e-08	6.25926	0.479907	0.00498185	0.316502
Solyc02g077560	SL3.0ch02	43026002	43028002	+	331	5697	244	5741	5.491	4.077	-1.41418	0.000226085	0.127841	6.55171	0.641865	1
Solyc02g077620	SL3.0ch02	43072561	43074561	-	1309	7090	835	5627	15.585	12.922	-2.66349	3.86208e-06	0.592288	1.28243	0.308182	1
Solyc02g077860	SL3.0ch02	43267938	43269938	+	1069	5996	872	6289	15.131	12.177	-2.95386	2.90912e-07	0.0907506	-1.96994	0.957539	1
Solyc02g078080	SL3.0ch02	43438808	43440808	-	430	3216	355	3524	11.794	9.152	-2.6419	0.000134264	0	-3.91086	1	1
Solyc02g078090	SL3.0ch02	43448618	43450618	-	822	5660	562	4699	12.681	10.682	-1.99889	0.000552951	0	-3.91086	1	1
Solyc02g078100	SL3.0ch02	43451944	43453944	-	3016	7712	2174	6185	28.113	26.008	-2.10545	0.000794447	7.23926	-2.60765	0.0215828	0.693925
Solyc02g078300	SL3.0ch02	43614913	43616913	-	2761	9543	2031	8763	22.44	18.816	-3.62385	1.88469e-11	0.169135	3.18192	0.673297	1
Solyc02g078320	SL3.0ch02	43615373	43617373	+	3289	10823	2696	9451	23.306	22.195	-1.11163	0.0164485	0.163842	4.09831	0.699141	1
Solyc02g078530	SL3.0ch02	43763189	43765189	+	2473	9820	1685	7114	20.117	19.15	-0.967236	0.0385147	0.232025	1.91863	0.77624	1
Solyc02g078540	SL3.0ch02	43774469	43776469	-	4246	6790	3531	6074	38.474	36.762	-1.71198	0.00645178	0.114433	7.53331	0.720744	1
Solyc02g078650	SL3.0ch02	43883830	43885830	+	1430	9352	1080	7699	13.263	12.302	-0.960761	0.022521	1.89756	1.80159	1	1
Solyc02g078660	SL3.0ch02	43894728	43896728	-	153	7323	96	5721	2.047	1.65	-0.396214	0.0487525	0.06885	2.30232	0.932396	1
Solyc02g078670	SL3.0ch02	43903546	43905546	-	2532	9480	2089	8468	21.079	19.788	-1.2911	0.0088497	-0.222397	6.43832	0.500427	1
Solyc02g078690	SL3.0ch02	43929001	43931001	-	1344	4549	1078	5344	22.807	16.786	-6.02067	1.34167e-16	-0.0200981	-1.47694	1	1
Solyc02g078720	SL3.0ch02	43952523	43954523	+	393	5994	327	6381	6.153	4.875	-1.27835	0.000917639	-0.19168	0.491471	0.77653	1
Solyc02g078890	SL3.0ch02	44081891	44083891	+	4789	10176	3921	8740	32.001	30.969	-1.03222	0.0319324	-0.0915585	3.3233	0.925485	1
Solyc02g078910	SL3.0ch02	44096006	44098006	-	180	3413	129	2989	5.01	4.137	-0.872474	0.0420517	0.565106	0.548225	0.406464	1
Solyc02g079095	SL3.0ch02	44267619	44269619	+	16	632	1	247	2.469	0.403	-2.06591	0.0255524	0.0155889	1.33557	1	1
Solyc02g079277	SL3.0ch02	44432786	44434786	+	28	1214	14	1176	2.254	1.176	-1.07796	0.0216476	-0.243738	-1.23292	0.799391	1
Solyc02g079300	SL3.0ch02	44473014	44475014	-	1683	5101	1040	4299	24.808	19.479	-5.32907	4.46103e-12	-0.112546	4.0533	0.727459	1
Solyc02g079330	SL3.0ch02	44488594	44490594	-	2273	9406	1954	8807	19.462	18.158	-1.30412	0.00689331	-0.015483	0.0280576	0.994406	1
Solyc02g079370	SL3.0ch02	44514665	44516665	+	1654	4949	1189	4063	25.049	22.639	-2.41023	0.00139977	0	-3.91086	1	1
Solyc02g079430	SL3.0ch02	44552714	44554714	-	2994	5518	2663	5500	35.174	32.623	-2.55106	0.000355283	-0.31976	1.14002	0.619218	1
Solyc02g079740	SL3.0ch02	44739284	44741284	+	2719	4271	2426	4694	38.898	34.073	-4.82539	3.44258e-09	0.302725	4.1422	0.378622	1
Solyc02g079790	SL3.0ch02	44789846	44791846	+	4633	6338	4669	7342	42.23	38.873	-3.35681	2.45044e-07	-0.161737	4.71128	0.793235	1
Solyc02g079860	SL3.0ch02	44828400	44830400	-	199	4020	121	3431	4.717	3.407	-1.31023	0.00243771	-0.923243	-1.06697	0.341396	1
Solyc02g079870	SL3.0ch02	44828129	44830129	+	199	4258	129	3786	4.465	3.295	-1.16987	0.00381267	-1.08697	0.583352	0.138387	1
Solyc02g079980	SL3.0ch02	44904074	44906074	-	1766	6667	1541	6820	20.942	18.431	-2.51073	3.57218e-05	0.69667	-0.280561	0.516577	1
Solyc02g080300	SL3.0ch02	45111798	45113798	+	33	1433	9	775	2.251	1.148	-1.10306	0.0343632	-0.287057	2.83265	0.583727	1
Solyc02g080330	SL3.0ch02	45131348	45133348	+	355	5832	224	4968	5.738	4.314	-1.42351	0.000405631	-1.93933	-3.87098	1	1
Solyc02g080710	SL3.0ch02	45422857	45424857	+	3464	8035	3135	8416	30.124	27.141	-2.98385	5.66007e-07	-3.66702	-3.75752	0.44125	1
Solyc02g080755	SL3.0ch02	45449005	45451005	+	1763	8838	1264	7437	16.631	14.527	-2.10344	4.87898e-05	0	-3.91086	1	1
Solyc02g080790	SL3.0ch02	45473114	45475114	-	2184	8809	1727	7645	19.867	18.427	-1.43996	0.00537967	0.188982	-1.64262	0.874491	1
Solyc02g080870	SL3.0ch02	45526402	45528402	+	3805	6600	3727	7275	36.569	33.876	-2.6933	2.94497e-05	0.504152	-2.95755	1	1
Solyc02g080890	SL3.0ch02	45549047	45551047	-	845	8195	645	7750	9.347	7.683	-1.6642	6.37363e-05	0.331511	4.85464	0.61167	1
Solyc02g080900	SL3.0ch02	45561165	45563165	+	2668	5016	2144	4384	34.721	32.843	-1.87836	0.010003	-0.416358	1.37111	0.52409	1
Solyc02g080960	SL3.0ch02	45589775	45591775	+	248	2019	200	2158	10.94	8.482	-2.4578	0.0030958	-0.221766	0.61578	0.689987	1
Solyc02g081180	SL3.0ch02	45793401	45795401	+	3620	7512	2754	6904	32.519	28.515	-4.00364	5.87601e-10	-3.61682	-3.75958	0.440506	1
Solyc02g081430	SL3.0ch02	45958176	45960176	+	2847	10292	2151	9129	21.668	19.069	-2.59917	5.30203e-07	-0.283625	1.99042	0.617059	1
Solyc02g081440	SL3.0ch02	45958176	45960176	+	2847	10292	2151	9129	21.668	19.069	-2.59917	5.30203e-07	-3.57861	-1.93845	0.0117194	0.518146
Solyc02g081470	SL3.0ch02	45983154	45985154	-	1223	6845	693	5243	15.159	11.675	-3.48412	3.35564e-09	0	-3.76702	1	1
Solyc02g081550	SL3.0ch02	46016163	46018163	+	185	1802	163	2132	9.311	7.102	-2.20812	0.00546039	0.108499	4.40884	0.813849	1
Solyc02g081570	SL3.0ch02	46027384	46029384	-	2695	5903	2521	6381	31.344	28.319	-3.02502	1.06789e-05	-1.71153	-3.44746	0.608262	1
Solyc02g081650	SL3.0ch02	46073974	46075974	+	170	5197	106	3999	3.168	2.582	-0.585288	0.0443997	-0.060863	4.381	0.846741	1
Solyc02g081700	SL3.0ch02	46110366	46112366	+	37	2095	3	527	1.735	0.566	-1.16942	0.0228428	0.012364	7.61772	0.969542	1
Solyc02g082040	SL3.0ch02	46335344	46337344	+	769	8091	534	6784	8.679	7.297	-1.38238	0.000815483	-4.61559	-3.20875	0.200561	1
Solyc02g082050	SL3.0ch02	46343352	46345352	+	3076	9983	2778	9917	23.555	21.883	-1.67201	0.000884546	-1.08245	-0.463869	0.185397	1
Solyc02g082250	SL3.0ch02	46496834	46498834	+	1518	6480	958	5385	18.98	15.103	-3.87648	1.2406e-09	0.171191	0.492702	0.794091	1
Solyc02g082300	SL3.0ch02	46563892	46565892	+	170	1978	11	1182	7.914	0.922	-6.99229	3.63266e-21	-0.0694396	1.39064	0.894101	1
Solyc02g082315	SL3.0ch02	46570069	46572069	+	30	752	11	980	3.836	1.11	-2.72633	0.000132031	1.31136	-2.18809	0.501985	1
Solyc02g082320	SL3.0ch02	46583018	46585018	+	247	785	143	633	23.934	18.428	-5.50627	0.00320664	3.28643	-3.41907	0.455308	1
Solyc02g082330	SL3.0ch02	46584214	46586214	+	252	1357	144	1070	15.662	11.862	-3.80029	0.00258574	1.73319	-0.291374	0.0572232	1
Solyc02g082440	SL3.0ch02	46694693	46696693	-	5946	9156	5240	8568	39.372	37.949	-1.42325	0.00719441	-0.535015	1.96125	0.326896	1
Solyc02g082880	SL3.0ch02	47080753	47082753	+	1267	7762	1116	7683	14.033	12.683	-1.3493	0.00465004	2.53593	-3.02603	0.64947	1
Solyc02g082960	SL3.0ch02	47117362	47119362	+	235	441	527	1669	34.763	23.998	-10.7651	5.82141e-08	0.701315	-3.40041	0.794008	1
Solyc02g083000	SL3.0ch02	47139946	47141946	+	184	7134	81	4893	2.514	1.628	-0.88588	0.000630507	-1.58613	-2.56339	0.300942	1
Solyc02g083050	SL3.0ch02	47168655	47170655	+	157	419	131	595	27.257	18.044	-9.21287	6.97373e-05	0.236097	-2.61272	0.891393	1
Solyc02g083260	SL3.0ch02	47271756	47273756	-	214	2250	181	2353	8.685	7.143	-1.54221	0.0227903	-0.0187988	4.67544	0.947194	1
Solyc02g083280	SL3.0ch02	47281088	47283088	+	607	8610	305	5026	6.586	5.721	-0.864404	0.0197299	-0.505763	7.72773	0.173513	1
Solyc02g083440	SL3.0ch02	47401009	47403009	+	752	3482	494	2966	17.761	14.277	-3.48353	3.1269e-05	-3.91762	-3.68723	0.227759	1
Solyc02g083500	SL3.0ch02	47428311	47430311	+	5192	7648	4661	7928	40.436	37.024	-3.41175	2.84945e-08	-0.446177	2.63437	0.305645	1
Solyc02g083520	SL3.0ch02	47441139	47443139	+	2897	7227	2194	6191	28.615	26.166	-2.4494	0.000152232	0.835218	-2.8956	0.641529	1
Solyc02g083560	SL3.0ch02	47473673	47475673	+	1503	8734	1078	7982	14.682	11.898	-2.78358	1.5791e-08	0.0676483	4.56843	0.821238	1
Solyc02g083610	SL3.0ch02	47514187	47516187	-	651	9231	328	7571	6.588	4.152	-2.43531	1.68891e-12	-0.603197	-0.404113	0.43263	1
Solyc02g083640	SL3.0ch02	47528426	47530426	-	114	3729	103	4279	2.966	2.351	-0.615908	0.0396198	-1.61848	-3.03807	0.426513	1
Solyc02g083670	SL3.0ch02	47542759	47544759	-	2229	5995	2032	5847	27.104	25.79	-1.31352	0.0291953	0.517789	3.92441	0.228032	1
Solyc02g083690	SL3.0ch02	47553804	47555804	-	3	7	20	764	30	2.551	-27.449	0.00138203	-1.37596	-2.44727	0.379994	1
Solyc02g083700	SL3.0ch02	47562625	47564625	-	2609	6063	1809	5401	30.085	25.09	-4.99518	4.63788e-12	-0.375073	6.48279	0.294477	1
Solyc02g083740	SL3.0ch02	47583301	47585301	+	2369	6263	2268	6569	27.444	25.665	-1.77957	0.0044681	-1.32129	2.11849	0.00895408	0.453753
Solyc02g083790	SL3.0ch02	47618411	47620411	-	92	2557	50	2150	3.473	2.273	-1.20028	0.00874348	0.903766	1.79811	0.0902893	1
Solyc02g083840	SL3.0ch02	47659364	47661364	+	137	2695	98	2421	4.838	3.89	-0.947138	0.0438709	-0.40581	-2.72434	0.917785	1
Solyc02g083890	SL3.0ch02	47693325	47695325	+	892	8374	610	7055	9.627	7.958	-1.66834	0.00010501	-1.10904	-0.229121	0.20312	1
Solyc02g084117	SL3.0ch02	47879052	47881052	-	1293	5703	147	3442	18.482	4.096	-14.3861	2.25935e-107	2.64661	0.81211	0.0539986	1
Solyc02g084180	SL3.0ch02	47923147	47925147	-	89	4077	52	3325	2.136	1.54	-0.596514	0.0289784	4.17744	-3.52886	0.215687	1
Solyc02g084220	SL3.0ch02	47944563	47946563	-	13	806	3	721	1.587	0.414	-1.17294	0.0126752	0.871458	3.15771	0.0334285	0.857035
Solyc02g084285	SL3.0ch02	47987429	47989429	+	190	2003	103	1533	8.664	6.296	-2.36809	0.00388153	-0.603348	1.14302	0.46652	1
Solyc02g084350	SL3.0ch02	48021709	48023709	-	2445	5586	1890	5347	30.445	26.116	-4.32873	4.17286e-09	0	-3.91086	1	1
Solyc02g084450	SL3.0ch02	48092231	48094231	+	6476	7747	5242	6551	45.532	44.45	-1.08179	0.0383466	-0.66614	2.98219	0.142308	1
Solyc02g084500	SL3.0ch02	48232881	48234881	-	351	135	4063	6845	72.222	37.248	-34.9743	2.99172e-51	0.215644	4.72219	0.468648	1
Solyc02g084530	SL3.0ch02	48250719	48252719	+	363	619	631	1315	36.965	32.425	-4.53989	0.00797497	-3.41918	-1.67711	0.0541753	1
Solyc02g084570	SL3.0ch02	48288482	48290482	-	939	4081	983	5240	18.705	15.796	-2.90894	3.84803e-05	-1.82921	-0.702257	0.095289	1
Solyc02g084620	SL3.0ch02	48348714	48350714	-	3330	5214	3361	6619	38.975	33.677	-5.29736	1.57314e-13	-0.436378	4.1958	0.176846	1
Solyc02g084680	SL3.0ch02	48413576	48415576	+	1404	6547	988	6769	17.658	12.737	-4.92127	2.50477e-17	0.52551	-0.744216	0.610216	1
Solyc02g084720	SL3.0ch02	48462070	48464070	-	745	6082	591	6334	10.913	8.534	-2.37826	2.39614e-06	-1.08698	5.83633	0.0144705	0.582053
Solyc02g084840	SL3.0ch02	48559074	48561074	-	1446	5364	1594	7050	21.233	18.441	-2.79294	1.28272e-05	-0.375049	0.428217	0.818617	1
Solyc02g084890	SL3.0ch02	48590733	48592733	-	1663	2375	3164	5507	41.184	36.489	-4.69431	4.48419e-07	4.16529	6.12622	1.3483e-10	1.30341e-07
Solyc02g084920	SL3.0ch02	48616195	48618195	-	13	399	14	900	3.155	1.532	-1.62361	0.0288811	0.224374	8.9142	0.397169	1
Solyc02g084960	SL3.0ch02	48632554	48634554	-	241	5346	225	7731	4.314	2.828	-1.48553	3.55782e-06	-0.281914	1.42305	0.640748	1
Solyc02g085000	SL3.0ch02	48675124	48677124	-	5151	4882	6311	8607	51.341	42.305	-9.03598	1.67938e-43	0.299241	5.98245	0.285624	1
Solyc02g085070	SL3.0ch02	48718759	48720759	+	40	1692	22	1867	2.309	1.165	-1.14483	0.00548003	3.01099	-3.80407	0.520586	1
Solyc02g085090	SL3.0ch02	48725737	48727737	+	326	2875	191	3998	10.184	4.56	-5.62476	4.26301e-20	2.70188	-2.51954	0.168785	1
Solyc02g085100	SL3.0ch02	48733232	48735232	-	34	1792	8	1205	1.862	0.66	-1.20247	0.00361398	-0.664626	4.25811	0.0909367	1
Solyc02g085120	SL3.0ch02	48741413	48743413	-	427	6884	330	6497	5.841	4.834	-1.00677	0.00449071	0.762808	-2.21454	0.636348	1
Solyc02g085250	SL3.0ch02	48858501	48860501	-	3787	8038	3925	9822	32.025	28.552	-3.47369	2.171e-09	0.539953	4.26641	0.0842104	1
Solyc02g085290	SL3.0ch02	48874960	48876960	-	840	1992	670	2212	29.661	23.248	-6.41327	4.40176e-08	1.88102	2.33383	0.0021428	0.182877
Solyc02g085410	SL3.0ch02	48959442	48961442	+	339	1338	309	1731	20.215	15.147	-5.06761	4.81888e-05	0	-3.87229	1	1
Solyc02g085535	SL3.0ch02	49022316	49024316	-	776	3846	410	2887	16.789	12.436	-4.35372	8.36981e-08	0	-3.86883	1	1
Solyc02g085550	SL3.0ch02	49023141	49025141	-	769	3902	420	3440	16.463	10.881	-5.58246	1.71398e-13	1.89435	-3.59657	1	1
Solyc02g085560	SL3.0ch02	49022124	49024124	+	779	4020	422	3100	16.233	11.982	-4.25072	5.02484e-08	0.189036	4.29054	0.634805	1
Solyc02g085590	SL3.0ch02	49058482	49060482	-	1611	4934	1674	6198	24.614	21.265	-3.34897	1.74232e-06	-0.660844	0.494518	0.519783	1
Solyc02g085710	SL3.0ch02	49159046	49161046	+	658	2999	536	3290	17.993	14.009	-3.98348	2.62671e-06	0.606099	2.38194	0.201242	1
Solyc02g085780	SL3.0ch02	49199954	49201954	-	2354	5210	2396	6922	31.121	25.714	-5.40743	2.03094e-14	0.223909	5.76981	0.406566	1
Solyc02g085790	SL3.0ch02	49200112	49202112	+	2342	5159	2383	6502	31.223	26.82	-4.40202	8.65475e-10	-0.0468551	6.57168	0.866379	1
Solyc02g085850	SL3.0ch02	49271588	49273588	+	211	266	3057	8115	44.235	27.363	-16.8718	3.26682e-14	0.622685	1.18536	0.227817	1
Solyc02g085940	SL3.0ch02	49353695	49355695	-	105	1392	62	1736	7.014	3.448	-3.56575	3.96758e-06	0	-3.91086	1	1
Solyc02g086200	SL3.0ch02	49571307	49573307	+	2862	5658	2459	5255	33.592	31.877	-1.71444	0.0109744	1.89816	-3.83241	1	1
Solyc02g086240	SL3.0ch02	49596959	49598959	+	3134	6842	2787	6709	31.415	29.349	-2.0662	0.00108985	0.126715	7.35097	0.669865	1
Solyc02g086270	SL3.0ch02	49620515	49622515	-	306	7688	189	6788	3.828	2.709	-1.11897	0.000102068	0.381706	4.43425	0.622741	1
Solyc02g086370	SL3.0ch02	49666519	49668519	+	5281	8356	4572	8249	38.726	35.66	-3.06528	2.62062e-07	-0.577737	3.2747	0.13853	1
Solyc02g086445	SL3.0ch02	49745021	49747021	+	73	1424	8	651	4.876	1.214	-3.66246	9.53588e-06	0	-3.91086	1	1
Solyc02g086460	SL3.0ch02	49759703	49761703	+	692	4382	419	4398	13.638	8.698	-4.9398	1.38228e-14	-0.371253	6.55821	0.29966	1
Solyc02g086590	SL3.0ch02	49887257	49889257	-	5412	9130	4831	8842	37.216	35.332	-1.88393	0.00066922	0.179082	3.57684	0.723198	1
Solyc02g086630	SL3.0ch02	49931205	49933205	-	7747	5270	6676	4992	59.514	57.216	-2.29816	0.000187309	-0.906229	-0.289437	0.294598	1
Solyc02g086640	SL3.0ch02	49930793	49932793	+	8538	7504	7381	6893	53.223	51.709	-1.51339	0.0048379	1.13146	-0.810741	0.173444	1
Solyc02g086700	SL3.0ch02	49986805	49988805	-	5790	7746	5154	7367	42.775	41.163	-1.61198	0.004858	8.22559	-1.49699	0.00907212	0.456387
Solyc02g086750	SL3.0ch02	50001734	50003734	+	133	1949	71	2165	6.388	3.175	-3.21278	6.04905e-07	0.126022	5.79802	0.694778	1
Solyc02g086800	SL3.0ch02	50049991	50051991	+	6087	9879	5034	8813	38.125	36.354	-1.77032	0.00104387	0.2738	4.09283	0.391912	1
Solyc02g086840	SL3.0ch02	50086030	50088030	-	3916	7576	3293	7355	34.076	30.926	-3.14988	5.76507e-07	-0.269054	-3.44027	1	1
Solyc02g086850	SL3.0ch02	50093905	50095905	+	4252	8110	3485	6967	34.396	33.343	-1.05283	0.0438416	0	-3.91086	1	1
Solyc02g086870	SL3.0ch02	50116657	50118657	-	6359	9600	5244	8510	39.846	38.127	-1.71876	0.00156419	0.373299	4.76327	0.188812	1
Solyc02g086880	SL3.0ch02	50120390	50122390	+	4529	10676	3771	9996	29.786	27.392	-2.39467	5.82115e-06	-0.281879	8.99482	0.428055	1
Solyc02g087300	SL3.0ch02	50382989	50384989	+	29	1822	5	779	1.567	0.638	-0.928966	0.0284197	0.23505	6.69946	0.375227	1
Solyc02g087410	SL3.0ch02	50497951	50499951	-	1422	6787	1398	7232	17.322	16.199	-1.12315	0.0255071	-0.368564	0.367508	0.609383	1
Solyc02g087480	SL3.0ch02	50549900	50551900	+	443	8150	313	8316	5.155	3.627	-1.52806	9.96237e-07	-0.215554	6.4524	0.58535	1
Solyc02g087600	SL3.0ch02	50611574	50613574	+	76	2242	49	2019	3.279	2.369	-0.909249	0.0391108	0.27692	2.25019	0.613735	1
Solyc02g087640	SL3.0ch02	50649655	50651655	-	1753	7652	1439	7975	18.639	15.286	-3.35328	1.23175e-09	0.289412	4.03589	0.336308	1
Solyc02g087710	SL3.0ch02	50673482	50675482	-	23	1025	2	436	2.195	0.457	-1.73804	0.00786399	-0.0130364	6.87383	0.972433	1
Solyc02g087820	SL3.0ch02	50725107	50727107	+	32	2360	7	1332	1.338	0.523	-0.815014	0.00980573	0	-3.91086	1	1
Solyc02g087850	SL3.0ch02	50750677	50752677	+	1163	7125	694	5297	14.032	11.584	-2.44829	1.48103e-05	-0.0582308	5.9424	0.892127	1
Solyc02g087870	SL3.0ch02	50782613	50784613	-	3392	7429	2740	6518	31.346	29.596	-1.75043	0.00424964	-0.272222	4.57462	0.514362	1
Solyc02g088115	SL3.0ch02	50942641	50944641	-	811	8206	626	7065	8.994	8.139	-0.854739	0.0256586	0.253441	2.81101	0.5156	1
Solyc02g088117	SL3.0ch02	50941928	50943928	+	791	7831	593	7058	9.174	7.751	-1.42358	0.00077216	0.788722	-1.00525	0.484228	1
Solyc02g088180	SL3.0ch02	50971104	50973104	+	1444	7838	1274	7424	15.557	14.647	-0.909947	0.0424257	-0.287078	-0.707243	0.805189	1
Solyc02g088510	SL3.0ch02	51218920	51220920	+	2049	6883	1569	6066	22.94	20.55	-2.38989	0.000155825	0.706135	2.78933	0.131684	1
Solyc02g088517	SL3.0ch02	51228634	51230634	-	2836	3174	1585	2217	47.188	41.689	-5.49944	1.04098e-07	-0.698435	1.40846	0.156108	1
Solyc02g088530	SL3.0ch02	51228408	51230408	-	2841	3449	1596	2610	45.167	37.946	-7.22114	4.04441e-13	-0.288351	-0.765151	0.772474	1
Solyc02g088540	SL3.0ch02	51227817	51229817	+	2822	3363	1608	3169	45.627	33.661	-11.9652	7.06998e-36	0.112851	3.73082	0.764313	1
Solyc02g088620	SL3.0ch02	51292469	51294469	-	1586	5392	1443	5344	22.729	21.261	-1.46734	0.0197795	0.532124	6.29658	0.0720831	1
Solyc02g088710	SL3.0ch02	51331431	51333431	+	33	1477	11	974	2.185	1.117	-1.06868	0.0292315	0	-3.72891	1	1
Solyc02g088750	SL3.0ch02	51366280	51368280	-	229	2113	109	1404	9.778	7.204	-2.57374	0.00350433	0	-3.28326	1	1
Solyc02g088780	SL3.0ch02	51388690	51390690	-	3595	7872	3195	7781	31.351	29.109	-2.24187	0.000186662	0.188031	6.51543	0.468127	1
Solyc02g088940	SL3.0ch02	51492304	51494304	+	91	3088	34	2507	2.863	1.338	-1.52448	6.00358e-05	0.204396	5.6008	0.557487	1
Solyc02g088980	SL3.0ch02	51535908	51537908	+	34	1626	14	1247	2.048	1.11	-0.937963	0.0270237	0.659964	-0.950158	0.60659	1
Solyc02g089010	SL3.0ch02	51546666	51548666	+	122	3771	76	3222	3.134	2.304	-0.829403	0.0179998	0.314347	3.23727	0.478519	1
Solyc02g089040	SL3.0ch02	51570229	51572229	+	1839	9914	1347	10382	15.647	11.484	-4.16271	4.42541e-20	-0.426698	-0.845553	0.745095	1
Solyc02g089130	SL3.0ch02	51651059	51653059	-	2260	4534	1937	5902	33.265	24.71	-8.55486	3.2631e-29	0.142629	2.23909	0.778111	1
Solyc02g089140	SL3.0ch02	51652470	51654470	+	5183	7808	4187	7233	39.897	36.664	-3.2331	2.24905e-07	3.95085	-0.754858	0.15126	1
Solyc02g089175	SL3.0ch02	51698496	51700496	-	2617	11836	2296	11278	18.107	16.915	-1.19228	0.00507393	0.20259	5.70085	0.483545	1
Solyc02g089200	SL3.0ch02	51710262	51712262	+	8267	10770	6257	8854	43.426	41.407	-2.01904	0.000129994	0.112685	8.60893	0.680645	1
Solyc02g089300	SL3.0ch02	51802589	51804589	-	6430	7403	5735	7325	46.483	43.913	-2.57034	1.90432e-05	0	-3.91086	1	1
Solyc02g089500	SL3.0ch02	51945731	51947731	-	13	137	4	370	8.667	1.07	-7.59715	3.48783e-05	0.699025	-0.291243	0.494	1
Solyc02g089690	SL3.0ch02	52073973	52075973	+	38	1309	6	750	2.821	0.794	-2.02743	0.000825148	-0.858656	2.14173	0.161823	1
Solyc02g089700	SL3.0ch02	52079199	52081199	+	495	5384	245	3760	8.42	6.117	-2.30245	1.4773e-05	-4.50795	-3.45142	0.177527	1
Solyc02g089710	SL3.0ch02	52090043	52092043	+	2962	7771	2477	7027	27.597	26.063	-1.53442	0.00779847	0	-3.91086	1	1
Solyc02g089800	SL3.0ch02	52141765	52143765	-	244	2845	146	2663	7.899	5.198	-2.70142	2.57498e-05	0.0251273	5.5872	0.93452	1
Solyc02g089820	SL3.0ch02	52151386	52153386	-	5987	7839	4533	6413	43.302	41.412	-1.89009	0.00177049	0.0927717	7.05136	0.777161	1
Solyc02g089850	SL3.0ch02	52187975	52189975	+	349	3553	227	3123	8.944	6.776	-2.16801	0.000449462	-0.499046	3.6015	0.161844	1
Solyc02g089860	SL3.0ch02	52200211	52202211	-	2022	7374	1573	7351	21.52	17.627	-3.89317	5.2214e-11	-0.915989	-0.677355	0.459306	1
Solyc02g089870	SL3.0ch02	52200144	52202144	+	2008	7382	1551	7282	21.384	17.559	-3.8253	1.12286e-10	0.154019	4.90539	0.610205	1
Solyc02g089980	SL3.0ch02	52302519	52304519	+	4833	7559	4704	8244	39.001	36.33	-2.67103	9.80404e-06	-0.28657	4.9219	0.374175	1
Solyc02g090043	SL3.0ch02	52340830	52342830	+	49	2382	17	1673	2.016	1.006	-1.00971	0.00625111	-0.860088	0.437735	0.207168	1
Solyc02g090080	SL3.0ch02	52357200	52359200	-	8	204	0	120	3.774	0	-3.77358	0.0265376	0	-3.91086	1	1
Solyc02g090290	SL3.0ch02	52514020	52516020	+	5285	7887	4747	7849	40.123	37.687	-2.43642	4.85352e-05	2.08451	-2.63012	0.252813	1
Solyc02g090380	SL3.0ch02	52568425	52570425	+	652	916	542	929	41.582	36.846	-4.73595	0.0046805	-0.382767	5.87844	0.471642	1
Solyc02g090505	SL3.0ch02	52675925	52677925	+	139	3791	48	2426	3.537	1.94	-1.59672	0.000127799	-0.161119	-1.7165	0.910153	1
Solyc02g090515	SL3.0ch02	52691153	52693153	+	7	402	0	207	1.711	0	-1.71149	0.0466887	0	-3.91086	1	1
Solyc02g090520	SL3.0ch02	52699708	52701708	-	14	389	1	165	3.474	0.602	-2.87154	0.0372921	0	-3.5743	1	1
Solyc02g090770	SL3.0ch02	52918630	52920630	-	2124	7191	1898	8008	22.802	19.16	-3.64183	7.97304e-10	-0.231449	1.28792	0.82055	1
Solyc02g090790	SL3.0ch02	52931317	52933317	-	3041	7063	2329	5818	30.097	28.587	-1.50978	0.0135665	-0.00717641	-3.19468	1	1
Solyc02g090830	SL3.0ch02	52946971	52948971	+	633	5702	602	5978	9.992	9.149	-0.843171	0.0484639	-0.0288202	-3.48879	1	1
Solyc02g090870	SL3.0ch02	52993222	52995222	+	1231	8716	1067	8616	12.376	11.019	-1.35628	0.00190248	0.316341	4.23858	0.445373	1
Solyc02g090930	SL3.0ch02	53040250	53042250	-	283	2347	234	2305	10.76	9.216	-1.54423	0.0334728	0.258387	4.25818	0.69355	1
Solyc02g091000	SL3.0ch02	53086975	53088975	-	980	4842	760	4242	16.833	15.194	-1.63878	0.0110011	0.481644	4.62058	0.249345	1
Solyc02g091280	SL3.0ch02	53263872	53265872	-	125	6157	79	5576	1.99	1.397	-0.592818	0.00720227	-0.326959	6.89043	0.237716	1
Solyc02g091290	SL3.0ch02	53262359	53264359	+	483	8676	150	6522	5.274	2.248	-3.0253	2.00817e-22	-0.805175	2.66472	0.0696412	1
Solyc02g091390	SL3.0ch02	53326575	53328575	-	34	882	12	615	3.712	1.914	-1.79791	0.0232083	0.858418	4.56907	0.189263	1
Solyc02g091440	SL3.0ch02	53373401	53375401	-	4116	11006	2953	9532	27.219	23.652	-3.56624	2.17957e-11	1.90131	-3.87171	1	1
Solyc02g091490	SL3.0ch02	53408566	53410566	-	7327	6407	6840	6298	53.349	52.063	-1.28663	0.0178918	-0.604598	6.69681	0.0527273	1
Solyc02g091650	SL3.0ch02	53528955	53530955	+	1702	2726	1466	3166	38.437	31.649	-6.78782	2.09036e-11	1.43806	2.91256	0.0788306	1
Solyc02g091660	SL3.0ch02	53543594	53545594	-	75	2301	47	2148	3.157	2.141	-1.01534	0.0175335	0.00134598	3.74863	0.998612	1
Solyc02g091700	SL3.0ch02	53576603	53578603	-	249	3899	176	3465	6.003	4.834	-1.16906	0.0126832	0.612641	6.43651	0.118595	1
Solyc02g091740	SL3.0ch02	53634183	53636183	+	115	3390	40	1821	3.281	2.149	-1.13165	0.0107805	-0.461113	1.79094	0.36709	1
Solyc02g091920	SL3.0ch02	53769081	53771081	+	892	5787	443	4204	13.355	9.533	-3.82226	5.33373e-10	-0.428532	4.70357	0.662226	1
Solyc02g091940	SL3.0ch02	53801146	53803146	-	197	1886	1	200	9.458	0.498	-8.96	2.42531e-07	-0.424807	0.488313	0.478496	1
Solyc02g091950	SL3.0ch02	53797985	53799985	+	45	1752	7	797	2.504	0.871	-1.63353	0.00332991	-0.482013	3.60705	0.243415	1
Solyc02g092040	SL3.0ch02	53887914	53889914	-	368	6533	161	4940	5.333	3.156	-2.17632	6.99181e-09	0.0442509	2.29191	0.947087	1
Solyc02g092050	SL3.0ch02	53902352	53904352	-	3975	6699	3034	5544	37.24	35.37	-1.87047	0.00433462	-0.174549	-0.0864888	0.871413	1
Solyc02g092080	SL3.0ch02	53926661	53928661	+	2006	5910	1406	4720	25.341	22.951	-2.38973	0.000689403	-0.104317	4.36199	0.729745	1
Solyc02g092090	SL3.0ch02	53937284	53939284	-	136	2698	74	2364	4.799	3.035	-1.7636	0.000726755	0	-3.91086	1	1
Solyc02g092110	SL3.0ch02	53958692	53960692	+	4670	6494	4006	5974	41.831	40.14	-1.6906	0.00693211	0.0887726	3.70945	0.942786	1
Solyc02g092120	SL3.0ch02	53961295	53963295	+	3302	6158	3009	5996	34.905	33.415	-1.49009	0.0169402	-1.93427	3.02719	0.0829418	1
Solyc02g092130	SL3.0ch02	53963652	53965652	+	33	1278	14	1553	2.517	0.893	-1.62374	0.000616144	0.0984525	4.18936	0.770532	1
Solyc02g092190	SL3.0ch02	53992432	53994432	+	666	6217	522	6090	9.676	7.895	-1.78128	0.000186942	-3.08469	-3.13472	0.140837	1
Solyc02g092200	SL3.0ch02	53996626	53998626	+	4567	6499	3978	6031	41.271	39.744	-1.52633	0.0127628	0.396512	1.62196	0.437475	1
Solyc02g092350	SL3.0ch02	54077149	54079149	+	4164	6421	3048	6008	39.339	33.657	-5.68144	4.30535e-16	-0.566246	-0.152335	0.613064	1
Solyc02g092517	SL3.0ch02	54223589	54225589	+	36	1375	26	1706	2.551	1.501	-1.05023	0.0195238	0.0763854	-0.531156	0.928593	1
Solyc02g092523	SL3.0ch02	54225884	54227884	+	74	2715	67	3596	2.653	1.829	-0.824179	0.0132557	-0.49535	0.296026	0.521598	1
Solyc02g092527	SL3.0ch02	54228779	54230779	+	17	428	13	1005	3.82	1.277	-2.54321	0.00235347	-1.09872	0.185559	0.103702	1
Solyc02g092560	SL3.0ch02	54254265	54256265	-	6553	8063	4763	6495	44.834	42.308	-2.52674	3.85722e-05	-0.189699	5.36728	0.52957	1
Solyc02g092650	SL3.0ch02	54306115	54308115	-	3372	4175	2125	3412	44.68	38.378	-6.30182	1.03991e-12	0.0639716	3.48998	0.903089	1
Solyc02g092660	SL3.0ch02	54305330	54307330	+	3382	4968	2132	3511	40.503	37.781	-2.72167	0.000802144	-0.47213	3.86576	0.203462	1
Solyc02g092840	SL3.0ch02	54451193	54453193	+	1650	8692	1498	8475	15.954	15.021	-0.933805	0.0325413	-0.406678	5.20798	0.304507	1
Solyc02g092960	SL3.0ch02	54555169	54557169	+	13	809	1	333	1.582	0.299	-1.28211	0.0374988	-1.91429	-3.87151	1	1
Solyc02g093130	SL3.0ch02	54688671	54690671	+	1252	5281	993	5064	19.164	16.394	-2.76999	3.89297e-05	0.0557312	4.16383	0.859628	1
Solyc02g093170	SL3.0ch02	54748074	54750074	-	1112	7869	1026	7955	12.382	11.424	-0.957577	0.0245533	-0.509462	2.74089	0.212225	1
Solyc02g093410	SL3.0ch02	54921706	54923706	+	747	10613	335	8321	6.576	3.87	-2.70556	5.37239e-17	0.541076	4.38689	0.173617	1
Solyc02g093420	SL3.0ch02	54934663	54936663	+	32	920	4	357	3.361	1.108	-2.25331	0.0121003	-0.597945	-1.32744	0.559076	1
Solyc02g093443	SL3.0ch02	54954997	54956997	+	55	1717	15	1152	3.104	1.285	-1.81849	0.000793066	-2.13304	-3.4385	0.426492	1
Solyc02g093550	SL3.0ch02	55017901	55019901	+	5077	6649	4795	6833	43.297	41.237	-2.06028	0.000936726	-0.350879	3.76904	0.352646	1
Solyc02g093600	SL3.0ch02	55037737	55039737	+	137	3619	80	3521	3.647	2.222	-1.42589	0.000224633	0.529121	4.30516	0.222717	1
Solyc02g093820	SL3.0ch02	55163728	55165728	+	3726	8633	2813	7510	30.148	27.25	-2.89824	1.49761e-06	-0.0673288	6.20104	0.802646	1
Solyc02g093890	SL3.0ch02	55234173	55236173	-	164	3859	77	2606	4.077	2.87	-1.20664	0.0050434	1.12312	-0.657906	0.737668	1
Solyc02g093990	SL3.0ch02	55301648	55303648	-	1676	4578	2016	5873	26.799	25.555	-1.24428	0.044864	1.89863	-3.83531	1	1
Solyc02g094150	SL3.0ch02	55411263	55413263	+	183	2740	81	1889	6.261	4.112	-2.14902	0.000644375	-0.0908082	4.15707	0.785937	1
Solyc02g094240	SL3.0ch02	55473386	55475386	-	236	4199	165	3899	5.321	4.06	-1.26127	0.00378045	0.573244	-0.979772	0.684816	1
Solyc02g094500	SL3.0ch02	55656306	55658306	-	29	790	28	1495	3.541	1.838	-1.70243	0.00858507	-0.027411	5.31653	0.915954	1
Solyc02g094630	SL3.0ch02	55856606	55858606	-	3664	11023	2911	9892	24.947	22.737	-2.21037	1.52873e-05	0.402183	1.47316	0.502518	1
Solyc03g005260	SL3.0ch03	153939	155939	-	1527	5632	1173	5199	21.33	18.409	-2.92113	1.77471e-05	0.139746	5.2107	0.669466	1
Solyc03g005470	SL3.0ch03	363957	365957	+	2804	8458	2349	8051	24.898	22.587	-2.31135	5.00542e-05	0.189981	6.87399	0.66408	1
Solyc03g005480	SL3.0ch03	371572	373572	+	3010	8056	2874	8275	27.2	25.778	-1.42234	0.00906831	0.0866183	2.52149	0.883891	1
Solyc03g005533	SL3.0ch03	409087	411087	-	1470	7405	1213	6960	16.563	14.842	-1.72183	0.0013118	0	-3.91086	1	1
Solyc03g005570	SL3.0ch03	417010	419010	+	1684	9270	1530	9025	15.373	14.495	-0.87788	0.0342022	0.0433496	2.7412	0.963314	1
Solyc03g005650	SL3.0ch03	467978	469978	-	5964	10255	4943	8937	36.772	35.612	-1.1593	0.0187729	0	-3.66258	1	1
Solyc03g005700	SL3.0ch03	500525	502525	-	2018	8957	1564	7885	18.387	16.552	-1.83523	0.000402573	0.570894	-0.026666	0.309362	1
Solyc03g005760	SL3.0ch03	539003	541003	-	685	5441	525	5444	11.182	8.795	-2.3864	1.0519e-05	-3.07864	8.15367	6.83995e-07	0.000313655
Solyc03g005770	SL3.0ch03	538878	540878	+	689	5505	519	5159	11.124	9.141	-1.98313	0.000259724	-3.20441	4.08491	2.77784e-05	0.0072524
Solyc03g005800	SL3.0ch03	546095	548095	+	3785	3984	3526	4024	48.719	46.702	-2.01728	0.00695076	-0.078142	4.02858	0.8114	1
Solyc03g005810	SL3.0ch03	552971	554971	-	479	3925	244	2418	10.876	9.166	-1.71044	0.0121172	0.210939	-0.957576	0.877514	1
Solyc03g005820	SL3.0ch03	558030	560030	-	1918	8158	1816	8768	19.035	17.158	-1.87736	0.000328193	-1.94111	-0.573193	0.123626	1
Solyc03g005880	SL3.0ch03	595848	597848	-	1187	7204	1008	7058	14.146	12.497	-1.64921	0.00122012	-1.41969	-0.862392	0.0874194	1
Solyc03g005900	SL3.0ch03	607498	609498	+	1107	9047	924	8209	10.902	10.117	-0.78495	0.0367381	-6.52001	-1.28744	0.000325152	0.046151
Solyc03g005910	SL3.0ch03	612426	614426	+	2110	8379	1576	7094	20.116	18.178	-1.93869	0.000468682	0	-3.63426	1	1
Solyc03g005940	SL3.0ch03	635547	637547	-	979	4618	723	4324	17.492	14.325	-3.16617	7.29954e-06	-0.839282	0.871795	0.53002	1
Solyc03g005970	SL3.0ch03	658879	660879	-	1041	4630	877	4363	18.357	16.737	-1.61991	0.0137947	0.201105	1.06458	0.733672	1
Solyc03g006110	SL3.0ch03	777112	779112	-	2229	8423	2028	8407	20.926	19.435	-1.49105	0.00402949	-4.72264	-0.203654	4.78534e-05	0.0111144
Solyc03g006240	SL3.0ch03	863701	865701	-	393	6414	234	5732	5.773	3.922	-1.85124	1.15086e-06	-1.42945	-0.595009	0.0699374	1
Solyc03g006250	SL3.0ch03	868790	870790	-	555	6695	484	6814	7.655	6.632	-1.02322	0.00916933	-0.594083	3.25169	0.306963	1
Solyc03g006420	SL3.0ch03	1022898	1024898	-	1819	8001	1526	7449	18.523	17.003	-1.52064	0.00383928	-0.147906	4.1116	0.659349	1
Solyc03g006590	SL3.0ch03	1172475	1174475	+	4262	7577	4346	8967	36	32.645	-3.35488	2.59499e-08	-3.16759	-2.75562	0.0258046	0.762793
Solyc03g006750	SL3.0ch03	1289039	1291039	+	24	754	0	106	3.085	0	-3.08483	0.0466021	-0.69777	-3.59163	0.902633	1
Solyc03g006760	SL3.0ch03	1289039	1291039	+	24	754	0	106	3.085	0	-3.08483	0.0466021	-0.482767	0.45	0.410108	1
Solyc03g006810	SL3.0ch03	1318323	1320323	+	998	5700	797	6047	14.9	11.645	-3.25473	2.75827e-08	0.388767	0.354733	0.511186	1
Solyc03g007080	SL3.0ch03	1639532	1641532	-	2368	7381	1515	6051	24.29	20.024	-4.26588	3.53289e-11	0.5628	-3.62666	1	1
Solyc03g007150	SL3.0ch03	1733323	1735323	+	111	4977	54	3266	2.182	1.627	-0.555098	0.0362518	0.0164913	2.04805	0.990361	1
Solyc03g007160	SL3.0ch03	1742599	1744599	-	1422	4667	1187	4503	23.354	20.861	-2.49243	0.000764164	0	-3.91086	1	1
Solyc03g007280	SL3.0ch03	1842699	1844699	+	21	829	6	896	2.471	0.665	-1.8054	0.00175403	0.0722768	3.95326	0.815583	1
Solyc03g007360	SL3.0ch03	1912328	1914328	-	364	3999	356	4810	8.343	6.891	-1.45167	0.00458801	-1.2883	1.79611	0.103201	1
Solyc03g007460	SL3.0ch03	2016211	2018211	-	503	8052	320	6833	5.88	4.474	-1.40596	6.5746e-05	0.552083	2.84573	0.219878	1
Solyc03g007670	SL3.0ch03	2198942	2200942	+	2519	10174	1904	8469	19.846	18.355	-1.49024	0.00252279	-0.0636261	6.86939	0.805305	1
Solyc03g007730	SL3.0ch03	2257423	2259423	+	1521	9761	1124	8179	13.482	12.082	-1.39953	0.00179591	0	-3.86962	1	1
Solyc03g007760	SL3.0ch03	2288205	2290205	-	4805	6998	4222	7727	40.71	35.334	-5.37649	4.0299e-17	-0.144346	5.12798	0.738076	1
Solyc03g007770	SL3.0ch03	2315034	2317034	+	601	6269	472	5726	8.748	7.615	-1.13282	0.0104533	0.209306	6.45849	0.611023	1
Solyc03g007820	SL3.0ch03	2375470	2377470	+	7630	9338	6704	8791	44.967	43.266	-1.70143	0.00129867	-0.548496	-1.03282	0.52477	1
Solyc03g007910	SL3.0ch03	2422899	2424899	+	2940	4548	2675	4921	39.263	35.216	-4.04692	2.8291e-07	4.63761	-3.61738	0.244994	1
Solyc03g007960	SL3.0ch03	2445877	2447877	+	587	10815	513	10761	5.148	4.55	-0.597927	0.019172	0.605679	5.03362	0.139766	1
Solyc03g007980	SL3.0ch03	2466106	2468106	-	4103	7463	3612	7017	35.475	33.983	-1.49217	0.0105078	-0.169278	5.24898	0.584366	1
Solyc03g025100	SL3.0ch03	2601801	2603801	-	29	695	7	421	4.006	1.636	-2.37001	0.017157	-5.1398	-3.31471	0.0437691	0.958098
Solyc03g025200	SL3.0ch03	2691681	2693681	+	1225	5705	1008	5635	17.677	15.174	-2.5029	6.81011e-05	0.0992951	3.78707	0.830581	1
Solyc03g025280	SL3.0ch03	2739026	2741026	+	2728	5832	1927	6233	31.869	23.615	-8.25396	7.85853e-32	-0.105132	5.5674	0.711113	1
Solyc03g025410	SL3.0ch03	2859634	2861634	-	4190	7173	3507	7346	36.874	32.314	-4.56042	1.70634e-12	-1.3529	2.399	0.0527012	1
Solyc03g025420	SL3.0ch03	2864573	2866573	+	3861	8390	3112	7523	31.516	29.262	-2.25392	0.000162677	0.247239	5.04633	0.36384	1
Solyc03g025460	SL3.0ch03	2898298	2900298	+	2628	8740	2192	7898	23.118	21.724	-1.39304	0.00823345	0	-3.86689	1	1
Solyc03g025540	SL3.0ch03	2967332	2969332	-	3654	5523	3651	6120	39.817	37.366	-2.45126	0.000378863	0.288867	4.93464	0.270867	1
Solyc03g025600	SL3.0ch03	3019910	3021910	+	612	2544	387	2684	19.392	12.602	-6.78988	5.15275e-13	-0.09641	5.67794	0.731591	1
Solyc03g025640	SL3.0ch03	3066682	3068682	-	944	9894	656	8303	8.71	7.322	-1.38785	0.000253711	0.0209664	-0.726475	1	1
Solyc03g025750	SL3.0ch03	3174379	3176379	+	509	3259	398	3277	13.508	10.83	-2.67856	0.000306288	0	-3.91086	1	1
Solyc03g025770	SL3.0ch03	3192046	3194046	-	1189	10154	915	9827	10.482	8.518	-1.96427	6.97323e-07	0	-3.91086	1	1
Solyc03g025800	SL3.0ch03	3224622	3226622	+	2376	7661	1907	7073	23.672	21.236	-2.43633	4.54661e-05	0.417547	1.77187	0.549287	1
Solyc03g025840	SL3.0ch03	3262615	3264615	+	2067	11002	1430	9187	15.816	13.469	-2.34709	4.04736e-07	-0.0552608	6.81549	0.852712	1
Solyc03g025900	SL3.0ch03	3346276	3348276	-	2874	5197	2474	5049	35.609	32.886	-2.72315	0.000240514	-0.217434	2.92616	0.601139	1
Solyc03g025950	SL3.0ch03	3407926	3409926	+	3125	8804	2211	8292	26.197	21.051	-5.14554	5.10354e-19	0.202189	7.84878	0.466192	1
Solyc03g025960	SL3.0ch03	3411580	3413580	+	99	256	90	319	27.887	22.005	-5.88243	0.0309302	0.463671	1.40334	0.543917	1
Solyc03g026120	SL3.0ch03	3558951	3560951	-	4019	7293	3397	7247	35.529	31.915	-3.61395	1.84214e-08	-0.67203	-1.55224	0.524904	1
Solyc03g031490	SL3.0ch03	4041431	4043431	-	4327	6522	4677	7622	39.884	38.027	-1.85638	0.00238188	0	-3.91086	1	1
Solyc03g031520	SL3.0ch03	4057237	4059237	-	2049	6989	1371	6563	22.671	17.28	-5.39088	6.14603e-18	0	-3.91086	1	1
Solyc03g031680	SL3.0ch03	4158552	4160552	+	2921	8286	2472	7850	26.064	23.949	-2.11522	0.000244748	-0.50918	2.07176	0.275849	1
Solyc03g031740	SL3.0ch03	4226541	4228541	-	7984	6925	7264	6595	53.552	52.414	-1.13795	0.0262566	-2.50742	-2.9236	0.166347	1
Solyc03g031810	SL3.0ch03	4315749	4317749	-	1243	2233	1106	2457	35.759	31.041	-4.71824	2.18171e-05	0	-3.91086	1	1
Solyc03g031960	SL3.0ch03	4480467	4482467	-	4285	9641	3773	8955	30.77	29.643	-1.12648	0.0229725	0	-3.91086	1	1
Solyc03g031980	SL3.0ch03	4497034	4499034	-	1553	9069	1263	7911	14.621	13.767	-0.853431	0.0403072	1.49676	-0.0858635	0.200982	1
Solyc03g032025	SL3.0ch03	4542316	4544316	+	155	1878	103	1594	7.624	6.07	-1.55467	0.0330476	0	-3.91086	1	1
Solyc03g032190	SL3.0ch03	4714714	4716714	+	2677	10329	2209	9188	20.583	19.382	-1.20051	0.0105874	-0.405112	-0.31375	0.786368	1
Solyc03g033270	SL3.0ch03	4866839	4868839	+	45	1522	8	792	2.872	1	-1.87173	0.00181714	0.0865511	0.978542	0.886389	1
Solyc03g033350	SL3.0ch03	4950707	4952707	+	2296	5031	2208	5752	31.336	27.739	-3.59746	1.08061e-06	0.11369	0.453277	0.885292	1
Solyc03g033420	SL3.0ch03	5011090	5013090	-	2998	7960	2381	6930	27.359	25.572	-1.7871	0.00252692	0.186129	5.35856	0.504673	1
Solyc03g033510	SL3.0ch03	5075300	5077300	-	5421	7147	4900	6852	43.133	41.695	-1.43832	0.0124264	-0.071215	3.63872	0.86726	1
Solyc03g033550	SL3.0ch03	5126137	5128137	+	5358	7603	5671	8393	41.339	40.323	-1.01659	0.04164	1.80319	-2.33019	1	1
Solyc03g033650	SL3.0ch03	5261898	5263898	+	844	1729	949	2578	32.802	26.907	-5.89546	7.04418e-07	0.227031	4.74705	0.41767	1
Solyc03g033760	SL3.0ch03	5414446	5416446	-	1321	8036	1040	7565	14.118	12.086	-2.03178	4.41708e-05	0	-3.91086	1	1
Solyc03g033800	SL3.0ch03	5441802	5443802	-	3976	4566	2648	3290	46.546	44.594	-1.95234	0.011082	0	-3.68901	1	1
Solyc03g034060	SL3.0ch03	5801905	5803905	-	1571	5001	1113	5288	23.904	17.388	-6.51653	1.7473e-19	0.526842	-3.11978	0.8356	1
Solyc03g034263	SL3.0ch03	6021605	6023605	+	331	3410	245	3351	8.848	6.813	-2.03478	0.000831773	0	-3.91086	1	1
Solyc03g034267	SL3.0ch03	6035121	6037121	+	560	8169	450	7343	6.415	5.774	-0.640984	0.0420797	0	-3.91086	1	1
Solyc03g034320	SL3.0ch03	6102855	6104855	-	7245	8811	6028	7714	45.123	43.866	-1.2578	0.0151572	-0.680651	2.97051	0.191899	1
Solyc03g034395	SL3.0ch03	6330680	6332680	-	2533	4597	1932	4111	35.526	31.971	-3.55507	1.49652e-05	-1.28587	0.768499	0.0490958	0.99772
Solyc03g034413	SL3.0ch03	6405148	6407148	-	109	1598	48	1389	6.385	3.34	-3.04518	7.53817e-05	0	-3.91086	1	1
Solyc03g034420	SL3.0ch03	6419356	6421356	+	1774	3794	931	2300	31.861	28.815	-3.04602	0.00179557	0	-3.91086	1	1
Solyc03g043573	SL3.0ch03	7008765	7010765	+	48	388	16	367	11.009	4.178	-6.83163	0.000167796	0	-3.91086	1	1
Solyc03g043740	SL3.0ch03	7287372	7289372	-	2306	11097	1670	9464	17.205	14.999	-2.206	2.79456e-06	-0.61069	2.53484	0.320361	1
Solyc03g043840	SL3.0ch03	7533946	7535946	-	1032	2436	978	2972	29.758	24.759	-4.99829	1.35885e-06	0	-3.91086	1	1
Solyc03g043940	SL3.0ch03	7694288	7696288	-	2594	5980	2468	6447	30.254	27.684	-2.57058	0.000135143	-0.201638	3.29898	0.680148	1
Solyc03g044080	SL3.0ch03	7960244	7962244	-	3073	7572	2332	6748	28.868	25.683	-3.18519	5.69958e-07	0.266531	3.79305	0.46207	1
Solyc03g044085	SL3.0ch03	7937609	7939609	+	2452	8358	1907	7977	22.683	19.294	-3.38889	2.95087e-09	-0.364849	-1.17813	0.786672	1
Solyc03g044150	SL3.0ch03	8242972	8244972	-	5231	9648	4888	9800	35.157	33.279	-1.87807	0.000456748	0.0219457	6.14638	0.950818	1
Solyc03g044385	SL3.0ch03	9042296	9044296	-	557	2634	542	3004	17.455	15.285	-2.17052	0.00927906	0	-3.91086	1	1
Solyc03g044460	SL3.0ch03	9309336	9311336	+	1333	6614	1209	6531	16.774	15.62	-1.15347	0.0250013	0	-2.33817	1	1
Solyc03g044560	SL3.0ch03	10149291	10151291	-	2221	7305	1967	7200	23.315	21.457	-1.85774	0.00147675	0	-3.60842	1	1
Solyc03g044590	SL3.0ch03	10198246	10200246	-	681	3315	362	2165	17.042	14.325	-2.71676	0.00214026	1.19292	-2.02128	0.598015	1
Solyc03g044660	SL3.0ch03	10321696	10323696	-	4043	8056	3316	7742	33.416	29.987	-3.42865	2.54662e-08	-0.32693	4.6313	0.362173	1
Solyc03g044990	SL3.0ch03	11265853	11267853	-	5512	6892	4400	5766	44.437	43.282	-1.15575	0.0384171	0	-3.91086	1	1
Solyc03g045000	SL3.0ch03	11304704	11306704	-	4442	5526	4608	6197	44.563	42.647	-1.91568	0.00322717	3.29831	-3.71413	0.522476	1
Solyc03g045080	SL3.0ch03	11508500	11510500	-	40	1864	10	883	2.101	1.12	-0.98102	0.0421323	-3.03487	-3.80323	0.522373	1
Solyc03g045085	SL3.0ch03	11513443	11515443	-	873	5979	293	4354	12.741	6.305	-6.43566	8.53995e-30	0	-3.91086	1	1
Solyc03g046330	SL3.0ch03	12307940	12309940	+	155	513	144	622	23.204	18.799	-4.40464	0.0215047	0	-3.91086	1	1
Solyc03g046380	SL3.0ch03	12425686	12427686	+	2961	9575	2597	8848	23.62	22.691	-0.928843	0.0413739	0.692763	3.03615	0.385922	1
Solyc03g046493	SL3.0ch03	13031613	13033613	+	1475	7232	1225	6831	16.94	15.206	-1.73434	0.00141614	0	-3.91086	1	1
Solyc03g046570	SL3.0ch03	13192243	13194243	+	318	4736	170	3243	6.292	4.981	-1.31109	0.00643102	0.0971614	4.77991	0.735082	1
Solyc03g070390	SL3.0ch03	18345243	18347243	+	4156	7397	3632	6835	35.973	34.7	-1.27381	0.0244019	0.125034	1.13911	0.878617	1
Solyc03g070460	SL3.0ch03	18472420	18474420	-	231	323	502	1221	41.697	29.135	-12.5615	7.24099e-08	0	-3.91086	1	1
Solyc03g070480	SL3.0ch03	18510220	18512220	-	604	4887	517	5178	11	9.078	-1.92168	0.000495926	0	-3.91086	1	1
Solyc03g071520	SL3.0ch03	19793178	19795178	+	271	4813	183	3944	5.33	4.434	-0.896235	0.0257202	0.493483	-3.41345	0.874354	1
Solyc03g071730	SL3.0ch03	20620095	20622095	-	1254	4549	1133	4750	21.61	19.259	-2.35063	0.00105017	-1.94415	-3.63177	1	1
Solyc03g071760	SL3.0ch03	20805872	20807872	-	1453	6455	1087	5568	18.374	16.334	-2.04021	0.000813706	0	-3.91086	1	1
Solyc03g053100	SL3.0ch03	24197567	24199567	+	104	4850	59	3735	2.099	1.555	-0.544227	0.0317536	-0.121788	5.06497	0.654502	1
Solyc03g058350	SL3.0ch03	26173939	26175939	+	1617	7656	1009	6262	17.438	13.877	-3.56068	5.97214e-10	-0.00163178	5.89027	0.99561	1
Solyc03g058370	SL3.0ch03	26264161	26266161	+	288	6502	155	6269	4.242	2.413	-1.8287	5.17419e-09	-1.13068	-1.93522	0.432615	1
Solyc03g058430	SL3.0ch03	26703466	26705466	-	3430	4512	3171	4444	43.188	41.641	-1.54662	0.0251678	-1.4857	-0.48523	0.157182	1
Solyc03g058910	SL3.0ch03	28823337	28825337	+	1349	8883	640	5851	13.184	9.86	-3.32432	9.98615e-11	-0.293625	-2.09797	0.871749	1
Solyc03g059035	SL3.0ch03	29691131	29693131	-	1802	4891	914	4324	26.924	17.449	-9.47424	4.79063e-34	-1.91427	-3.87151	1	1
Solyc03g059260	SL3.0ch03	30412018	30414018	-	4160	9353	3884	9297	30.785	29.467	-1.31851	0.0103319	-0.718945	6.6525	0.131288	1
Solyc03g059430	SL3.0ch03	31918021	31920021	-	101	2876	51	2565	3.393	1.95	-1.44314	0.000612174	-0.944671	-3.61642	1	1
Solyc03g062750	SL3.0ch03	34286084	34288084	-	3908	10729	2917	8837	26.699	24.817	-1.88238	0.000359339	0	-3.91086	1	1
Solyc03g062820	SL3.0ch03	34536848	34538848	+	509	1464	538	2179	25.798	19.801	-5.99703	1.25749e-06	0	-3.91086	1	1
Solyc03g062830	SL3.0ch03	34556879	34558879	-	2097	6183	1715	5530	25.326	23.671	-1.65459	0.00937965	-0.168303	4.83379	0.564558	1
Solyc03g062950	SL3.0ch03	34748383	34750383	+	65	3590	23	2191	1.778	1.039	-0.739542	0.0135536	0.0191651	-1.84483	1	1
Solyc03g063110	SL3.0ch03	35467869	35469869	-	1594	6449	1236	6008	19.818	17.062	-2.75608	9.96506e-06	-0.109877	5.25667	0.695254	1
Solyc03g063370	SL3.0ch03	36742077	36744077	-	44	2402	10	1081	1.799	0.917	-0.882265	0.0258822	-1.52067	0.0335274	0.021033	0.686413
Solyc03g063560	SL3.0ch03	37173519	37175519	-	4356	8245	3032	6047	34.569	33.396	-1.17294	0.0350082	-0.331155	7.10903	0.338956	1
Solyc03g013225	SL3.0ch03	48241686	48243686	-	715	2243	722	2505	24.172	22.374	-1.79802	0.0448804	0	-3.91086	1	1
Solyc03g013060	SL3.0ch03	49083234	49085234	+	631	8124	383	5795	7.207	6.199	-1.00789	0.00854746	0	-3.91086	1	1
Solyc03g013020	SL3.0ch03	49265270	49267270	-	279	2346	111	1235	10.629	8.247	-2.38191	0.0095187	0	-3.91086	1	1
Solyc03g077950	SL3.0ch03	50061144	50063144	-	151	4709	71	3614	3.107	1.927	-1.18027	0.000486681	-0.0250435	1.17359	0.97771	1
Solyc03g077990	SL3.0ch03	50255705	50257705	-	1716	5681	1256	5327	23.199	19.079	-4.11915	3.48768e-09	0	-3.82867	1	1
Solyc03g078025	SL3.0ch03	50386844	50388844	+	214	1436	43	666	12.97	6.065	-6.90482	3.67282e-07	0.253801	3.3003	0.450262	1
Solyc03g078075	SL3.0ch03	51426867	51428867	+	612	1532	591	1888	28.545	23.84	-4.70452	0.000199745	0	-3.91086	1	1
Solyc03g078120	SL3.0ch03	51519753	51521753	-	3698	5737	3350	5669	39.194	37.144	-2.05068	0.00247656	0.381955	5.21085	0.187681	1
Solyc03g078170	SL3.0ch03	51575871	51577871	-	1492	4563	1375	4644	24.641	22.844	-1.79647	0.0109876	0	-3.91086	1	1
Solyc03g078175	SL3.0ch03	51580051	51582051	-	946	2425	725	2354	28.063	23.547	-4.51628	2.90845e-05	0	-3.91086	1	1
Solyc03g078370	SL3.0ch03	52148742	52150742	+	152	1526	123	2680	9.058	4.388	-4.67025	9.18077e-10	-0.164851	4.15462	0.748269	1
Solyc03g078405	SL3.0ch03	52286927	52288927	+	1804	6249	1284	4899	22.402	20.767	-1.63497	0.0102336	0	-3.91086	1	1
Solyc03g078420	SL3.0ch03	52316807	52318807	+	1225	5358	1057	5111	18.609	17.137	-1.4717	0.0160438	0	-3.91086	1	1
Solyc03g078535	SL3.0ch03	52556638	52558638	+	4271	10237	2585	7577	29.439	25.438	-4.00102	7.68964e-12	0	-3.91086	1	1
Solyc03g078540	SL3.0ch03	52556675	52558675	+	3989	10224	2472	7538	28.066	24.695	-3.37055	6.31883e-09	0	-3.91086	1	1
Solyc03g078710	SL3.0ch03	52801452	52803452	+	2251	1930	2396	2264	53.839	51.416	-2.42249	0.0123585	0.540679	-2.96574	0.881183	1
Solyc03g078830	SL3.0ch03	52963672	52965672	-	754	4938	435	4212	13.247	9.361	-3.88578	8.75193e-10	-0.971092	-1.54147	0.411628	1
Solyc03g079850	SL3.0ch03	53097195	53099195	-	1312	9170	901	8456	12.517	9.629	-2.88754	1.47052e-10	0.433969	4.48188	0.175905	1
Solyc03g079930	SL3.0ch03	53281240	53283240	-	79	2104	27	1464	3.619	1.811	-1.80801	0.000792189	-0.392769	-3.05538	0.871767	1
Solyc03g080075	SL3.0ch03	53387819	53389819	+	733	6043	534	6444	10.818	7.653	-3.16497	2.07459e-10	-1.64337	-2.02986	0.208133	1
Solyc03g081190	SL3.0ch03	53538896	53540896	-	130	1191	123	2251	9.841	5.181	-4.6599	1.46814e-07	-0.243628	0.410082	0.670002	1
Solyc03g081335	SL3.0ch03	53680047	53682047	+	2043	7586	1868	7479	21.217	19.985	-1.23213	0.0187155	0.19597	-2.39546	0.932789	1
Solyc03g082660	SL3.0ch03	53994996	53996996	+	1904	8843	1552	7835	17.717	16.534	-1.18307	0.0139338	0.185944	7.60901	0.635227	1
Solyc03g082725	SL3.0ch03	54060215	54062215	-	100	3062	45	2414	3.163	1.83	-1.33254	0.00104611	0.0986578	1.16311	0.86578	1
Solyc03g082730	SL3.0ch03	54061325	54063325	-	138	4979	69	3762	2.697	1.801	-0.895796	0.00319179	0.843209	-0.247746	0.426824	1
Solyc03g082740	SL3.0ch03	54059679	54061679	+	190	3012	69	2416	5.934	2.777	-3.15713	1.01924e-08	0.0416762	4.05268	0.908069	1
Solyc03g082760	SL3.0ch03	54067975	54069975	-	4525	6035	4544	6374	42.85	41.619	-1.23103	0.0324903	0	-3.91086	1	1
Solyc03g082880	SL3.0ch03	54208736	54210736	-	23	970	2	322	2.316	0.617	-1.69893	0.0286343	0	-3.91086	1	1
Solyc03g082950	SL3.0ch03	54239361	54241361	+	1272	8022	857	6357	13.686	11.88	-1.80657	0.000390335	-0.537102	-3.31484	0.846192	1
Solyc03g083110	SL3.0ch03	54353294	54355294	+	2079	7540	1592	6350	21.613	20.045	-1.56814	0.00618681	0	-3.91086	1	1
Solyc03g083120	SL3.0ch03	54359876	54361876	+	7025	8475	5965	7805	45.323	43.319	-2.00377	0.000390335	1.68007	-3.21506	0.198486	1
Solyc03g083250	SL3.0ch03	54525140	54527140	+	226	2406	224	2911	8.587	7.145	-1.44149	0.0214777	0.191725	6.5369	0.580711	1
Solyc03g083385	SL3.0ch03	54658908	54660908	+	2581	5804	1989	4951	30.781	28.66	-2.12121	0.00253918	0	-3.91086	1	1
Solyc03g083410	SL3.0ch03	54704789	54706789	+	274	5396	212	4998	4.832	4.069	-0.763354	0.0275061	0.189029	3.98845	0.559936	1
Solyc03g083420	SL3.0ch03	54716522	54718522	+	208	3851	95	2998	5.124	3.071	-2.05296	1.5024e-05	0.198137	6.52342	0.4915	1
Solyc03g083430	SL3.0ch03	54734540	54736540	-	1889	4625	1679	4404	28.999	27.602	-1.39757	0.0397002	0.168761	6.86394	0.579689	1
Solyc03g083550	SL3.0ch03	54919187	54921187	-	1544	5947	933	5178	20.611	15.268	-5.34385	1.67831e-15	-0.218386	1.20442	0.647702	1
Solyc03g083615	SL3.0ch03	55005996	55007996	+	2740	6075	2713	6858	31.083	28.346	-2.73734	3.87397e-05	0.310945	6.80714	0.433197	1
Solyc03g083730	SL3.0ch03	55096268	55098268	+	921	6731	856	6905	12.036	11.03	-1.00656	0.0254257	-0.642254	3.6795	0.530419	1
Solyc03g083770	SL3.0ch03	55131320	55133320	+	3341	6279	2623	5924	34.73	30.689	-4.0406	9.15547e-09	-2.50129	1.96268	0.000136982	0.0239004
Solyc03g083810	SL3.0ch03	55146051	55148051	-	894	3327	802	3540	21.18	18.471	-2.70906	0.00113458	1.79591	-3.45541	1	1
Solyc03g083890	SL3.0ch03	55247231	55249231	-	1605	7934	1429	7864	16.826	15.377	-1.4485	0.00400108	0	-3.91086	1	1
Solyc03g093040	SL3.0ch03	55626126	55628126	+	990	8341	614	6755	10.61	8.332	-2.27759	6.33948e-07	0	-3.91086	1	1
Solyc03g093110	SL3.0ch03	55713947	55715947	-	3894	6424	3436	5947	37.74	36.619	-1.12045	0.0478418	0.110833	7.0054	0.869777	1
Solyc03g093210	SL3.0ch03	55826556	55828556	+	1880	4948	1324	4535	27.534	22.598	-4.93597	2.57625e-10	0.374333	2.90686	0.422895	1
Solyc03g093240	SL3.0ch03	55853890	55855890	+	612	5365	419	4970	10.239	7.775	-2.46415	4.65698e-06	-0.620258	4.2031	0.0642297	1
Solyc03g093260	SL3.0ch03	55869105	55871105	+	203	2395	124	2202	7.814	5.331	-2.48266	0.000317557	-0.105743	3.27161	0.85429	1
Solyc03g093270	SL3.0ch03	55879490	55881490	+	1817	8452	1133	6754	17.694	14.365	-3.32862	2.11149e-09	0	-3.91086	1	1
Solyc03g093280	SL3.0ch03	55885910	55887910	+	1270	8082	1098	7588	13.58	12.641	-0.938951	0.0305826	0	-3.91086	1	1
Solyc03g093290	SL3.0ch03	55894270	55896270	+	3005	8101	2522	7705	27.057	24.66	-2.39723	5.0878e-05	0	-3.91086	1	1
Solyc03g094160	SL3.0ch03	57487367	57489367	+	6977	8221	6091	7476	45.907	44.896	-1.01165	0.0398302	0.0635175	6.35412	0.89316	1
Solyc03g095180	SL3.0ch03	57574042	57576042	+	795	261	565	225	75.284	71.519	-3.7651	0.0331429	-0.134308	0.314683	0.841883	1
Solyc03g095290	SL3.0ch03	57741006	57743006	+	3524	5005	3434	5337	41.318	39.152	-2.16611	0.00222767	0.0853292	4.77971	0.782823	1
Solyc03g095460	SL3.0ch03	58011058	58013058	-	123	3467	54	2466	3.426	2.143	-1.28333	0.0019166	0	-3.91086	1	1
Solyc03g095500	SL3.0ch03	58046723	58048723	+	3089	7459	2738	7008	29.285	28.094	-1.1916	0.0299708	0	-3.91086	1	1
Solyc03g095600	SL3.0ch03	58203375	58205375	+	94	4429	40	3343	2.078	1.182	-0.895884	0.00160458	-0.0198435	3.50516	0.971668	1
Solyc03g095615	SL3.0ch03	58220279	58222279	-	170	1254	109	993	11.938	9.891	-2.0471	0.049966	0	-3.91086	1	1
Solyc03g095650	SL3.0ch03	58268741	58270741	-	3894	6345	2953	5200	38.031	36.22	-1.81126	0.00648616	0.152271	-0.976522	0.934167	1
Solyc03g095900	SL3.0ch03	59007170	59009170	+	5332	5916	4049	6056	47.404	40.069	-7.33471	2.33944e-26	4.96553	10.4677	2.61618e-14	3.46576e-11
Solyc03g096197	SL3.0ch03	59557756	59559756	+	1847	5641	1550	5369	24.666	22.402	-2.26405	0.000927256	0	-3.91086	1	1
Solyc03g096220	SL3.0ch03	59584471	59586471	+	1429	5164	1175	4725	21.675	19.915	-1.75925	0.00867445	0.309552	3.8793	0.465105	1
Solyc03g096540	SL3.0ch03	60136060	60138060	-	436	1723	592	3134	20.195	15.888	-4.30618	2.80057e-05	1.81336	0.452355	1	1
Solyc03g096550	SL3.0ch03	60134896	60136896	+	1459	4084	1236	3807	26.321	24.509	-1.81227	0.0171094	0.629197	3.30201	0.733762	1
Solyc03g096630	SL3.0ch03	60279184	60281184	+	5278	9745	4072	8295	35.133	32.926	-2.20646	9.52892e-05	-1.27644	-3.01988	0.546465	1
Solyc03g096710	SL3.0ch03	60454823	60456823	-	172	3026	41	1396	5.378	2.853	-2.5252	7.5622e-05	-2.65989	-3.83515	0.586673	1
Solyc03g096720	SL3.0ch03	60491902	60493902	-	1530	3539	1543	3969	30.183	27.993	-2.19	0.00743699	-3.61574	-3.72541	0.416361	1
Solyc03g096770	SL3.0ch03	60549794	60551794	-	1208	6508	814	5360	15.656	13.184	-2.47146	3.33333e-05	-0.342561	1.58464	0.771745	1
Solyc03g096790	SL3.0ch03	60563158	60565158	+	5874	8543	4769	8181	40.744	36.826	-3.91731	5.12242e-11	0.176318	4.59444	0.533774	1
Solyc03g096840	SL3.0ch03	60646573	60648573	-	4067	7125	2994	6494	36.338	31.556	-4.78281	9.1631e-13	-0.229728	8.38513	0.545413	1
Solyc03g096870	SL3.0ch03	60675637	60677637	-	1086	4770	244	3998	18.545	5.752	-12.7931	1.08058e-83	-1.75027	-0.451433	0.0954491	1
Solyc03g097110	SL3.0ch03	60885757	60887757	-	1592	8591	1294	7771	15.634	14.275	-1.35922	0.0048053	0.220643	6.30061	0.439772	1
Solyc03g097220	SL3.0ch03	60966874	60968874	-	1758	6722	2528	10510	20.731	19.389	-1.34166	0.00893787	0	-3.91086	1	1
Solyc03g097240	SL3.0ch03	60982249	60984249	-	40	677	7	256	5.579	2.662	-2.9172	0.0304947	-1.02631	3.70374	0.00820714	0.433609
Solyc03g097280	SL3.0ch03	61025614	61027614	+	507	2033	500	2679	19.961	15.728	-4.23241	2.54102e-05	0.239567	5.03509	0.481717	1
Solyc03g097300	SL3.0ch03	61066304	61068304	-	773	7367	607	7143	9.496	7.832	-1.66406	0.000142896	0.100401	4.4942	0.744444	1
Solyc03g097400	SL3.0ch03	61162433	61164433	+	2033	6649	1922	7771	23.416	19.829	-3.58752	4.59551e-09	-0.266912	2.26148	0.572343	1
Solyc03g097440	SL3.0ch03	61195480	61197480	+	3186	10306	2931	10106	23.614	22.482	-1.13183	0.0147296	-1.35624	7.2976	0.00494135	0.314488
Solyc03g097470	SL3.0ch03	61248899	61250899	-	7846	9571	6430	8672	45.048	42.577	-2.4708	6.705e-06	-0.23784	8.20466	0.588895	1
Solyc03g097560	SL3.0ch03	61329307	61331307	-	2128	6136	1901	6190	25.75	23.495	-2.255	0.000551809	-1.97838	3.89661	0.0184548	0.651986
Solyc03g097570	SL3.0ch03	61337974	61339974	-	4439	6903	3674	6086	39.138	37.643	-1.49428	0.0138308	-0.918731	-3.08511	0.90833	1
Solyc03g097670	SL3.0ch03	61433676	61435676	-	6267	19190	5263	17188	24.618	23.442	-1.17582	0.00165698	0.318734	8.22637	0.527871	1
Solyc03g097930	SL3.0ch03	61756187	61758187	-	289	2236	307	2892	11.446	9.597	-1.8488	0.0122259	-0.81456	-0.806368	0.340302	1
Solyc03g097980	SL3.0ch03	61783853	61785853	-	1694	4769	1102	3677	26.211	23.059	-3.15152	9.89176e-05	-0.326837	2.76836	0.48288	1
Solyc03g098090	SL3.0ch03	61873524	61875524	-	4118	7124	2910	5920	36.63	32.956	-3.67466	6.84649e-08	1.35549	-1.5411	0.271329	1
Solyc03g098100	SL3.0ch03	61873697	61875697	+	4133	8052	2915	6206	33.919	31.959	-1.95954	0.00164042	0.842812	4.09709	0.035943	0.884188
Solyc03g098210	SL3.0ch03	62008212	62010212	-	1091	7334	700	6567	12.95	9.633	-3.31697	9.87576e-11	0.304357	5.26879	0.384334	1
Solyc03g098240	SL3.0ch03	62029069	62031069	+	2169	2765	2308	3136	43.96	42.395	-1.56498	0.0492897	0.734769	9.55283	0.132005	1
Solyc03g098310	SL3.0ch03	62093216	62095216	+	6154	8696	5271	8180	41.441	39.187	-2.2544	8.52557e-05	-6.62744	-2.8499	0.00325951	0.242383
Solyc03g098470	SL3.0ch03	62193910	62195910	-	463	4565	331	4092	9.208	7.484	-1.72482	0.00159423	-0.128378	5.60022	0.694361	1
Solyc03g098520	SL3.0ch03	62243155	62245155	+	685	7472	458	6016	8.398	7.074	-1.32324	0.00193406	0	-3.91086	1	1
Solyc03g098540	SL3.0ch03	62277473	62279473	+	3146	9328	2170	8097	25.22	21.136	-4.08478	8.05208e-13	0	-3.25478	1	1
Solyc03g098610	SL3.0ch03	62350853	62352853	-	2851	7052	1921	5216	28.789	26.916	-1.87318	0.00418414	-0.423621	3.6151	0.23335	1
Solyc03g098660	SL3.0ch03	62392291	62394291	+	154	1809	83	1663	7.845	4.754	-3.09141	8.90982e-05	-0.577824	4.64516	0.479458	1
Solyc03g098700	SL3.0ch03	62415895	62417895	-	1097	3730	601	2804	22.726	17.651	-5.07582	2.23231e-08	-1.82853	-3.65794	0.645872	1
Solyc03g098710	SL3.0ch03	62424081	62426081	-	1352	5365	958	4108	20.128	18.91	-1.21765	0.0463285	0	-3.74492	1	1
Solyc03g098750	SL3.0ch03	62465229	62467229	-	597	8462	432	8520	6.59	4.826	-1.76439	3.74561e-07	0.513224	5.32084	0.204445	1
Solyc03g019870	SL3.0ch03	62785877	62787877	+	2225	10381	1355	8823	17.65	13.313	-4.3373	8.57987e-19	3.84985	-3.36138	0.257679	1
Solyc03g019860	SL3.0ch03	62790995	62792995	+	291	5753	170	5301	4.815	3.107	-1.7074	2.62248e-06	1.72134	-2.20874	0.233463	1
Solyc03g019800	SL3.0ch03	62825196	62827196	+	5947	10792	4847	9477	35.528	33.838	-1.6895	0.00117794	0.270598	4.05488	0.397246	1
Solyc03g019790	SL3.0ch03	62833528	62835528	+	1538	5833	1312	5345	20.866	19.709	-1.15698	0.0429332	-0.352204	3.79389	0.568833	1
Solyc03g019670	SL3.0ch03	62927085	62929085	+	771	4846	683	5180	13.726	11.649	-2.07686	0.000549801	-0.363358	4.68628	0.435494	1
Solyc03g019650	SL3.0ch03	62942213	62944213	+	721	8164	583	9129	8.115	6.003	-2.11192	2.29037e-08	-0.551798	6.72372	0.101507	1
Solyc03g111030	SL3.0ch03	63194368	63196368	+	39	824	13	515	4.519	2.462	-2.057	0.0279511	0.42305	0.603193	0.61113	1
Solyc03g111090	SL3.0ch03	63237887	63239887	-	1026	7322	758	8010	12.29	8.645	-3.6453	1.38752e-14	0.370202	-1.19338	0.674695	1
Solyc03g111070	SL3.0ch03	63227162	63229162	+	2	9	2	155	18.182	1.274	-16.9079	0.011448	0	-3.91086	1	1
Solyc03g111280	SL3.0ch03	63386108	63388108	-	914	5360	827	5270	14.568	13.564	-1.00401	0.0496713	0.845789	1.46154	0.543578	1
Solyc03g111320	SL3.0ch03	63415083	63417083	+	3232	6856	2548	5885	32.038	30.215	-1.82343	0.00443161	0.106286	7.89272	0.776879	1
Solyc03g111690	SL3.0ch03	63825403	63827403	+	2088	2909	1977	3067	41.785	39.195	-2.58999	0.00463425	2.66327	10.2999	5.06836e-06	0.00169425
Solyc03g111750	SL3.0ch03	63876193	63878193	-	1332	7368	1086	7241	15.31	13.042	-2.26843	1.82128e-05	-0.498704	-1.12554	0.641677	1
Solyc03g111790	SL3.0ch03	63905109	63907109	+	26	1098	22	1508	2.313	1.438	-0.875259	0.0481988	0.122618	-0.672726	0.896503	1
Solyc03g111880	SL3.0ch03	63966641	63968641	-	4216	6851	4189	7568	38.095	35.63	-2.4654	8.509e-05	-2.65983	-3.7952	0.587736	1
Solyc03g111970	SL3.0ch03	64027682	64029682	-	44	1548	9	770	2.764	1.155	-1.60849	0.00642524	0	-3.91086	1	1
Solyc03g111975	SL3.0ch03	64028256	64030256	-	44	1547	9	863	2.766	1.032	-1.73345	0.00213667	0	-3.91086	1	1
Solyc03g112040	SL3.0ch03	64064347	64066347	+	2106	4582	1669	4070	31.489	29.082	-2.40751	0.00225592	4.61892	3.02846	0.0239055	0.731475
Solyc03g112140	SL3.0ch03	64119151	64121151	+	1533	7467	1241	7568	17.033	14.088	-2.94547	6.64413e-08	-0.269011	3.50607	0.414989	1
Solyc03g112190	SL3.0ch03	64161112	64163112	+	4473	11897	979	4047	27.324	19.479	-7.84566	3.66671e-29	0.354322	1.97035	0.46516	1
Solyc03g112320	SL3.0ch03	64243128	64245128	-	346	2417	204	2218	12.523	8.423	-4.09983	1.4837e-06	0.432883	0.838581	0.5118	1
Solyc03g112330	SL3.0ch03	64241644	64243644	+	301	1804	155	2705	14.299	5.42	-8.87971	1.23537e-25	0.893412	2.45821	0.280707	1
Solyc03g112335	SL3.0ch03	64242002	64244002	+	330	2103	169	2719	13.564	5.852	-7.7117	2.95417e-21	-3.39662	-3.69538	0.433545	1
Solyc03g112350	SL3.0ch03	64256762	64258762	+	1474	7973	1051	6676	15.603	13.602	-2.00118	0.000164859	0.764919	3.33402	0.146073	1
Solyc03g112353	SL3.0ch03	64259243	64261243	+	34	1527	4	476	2.178	0.833	-1.34476	0.0373052	0.201157	2.74295	0.665299	1
Solyc03g112450	SL3.0ch03	64338946	64340946	-	1135	6482	853	6204	14.901	12.087	-2.81359	6.34053e-07	0.187067	6.02892	0.461496	1
Solyc03g112510	SL3.0ch03	64383461	64385461	+	31	1591	2	386	1.911	0.515	-1.39576	0.0337703	0.992278	0.873529	0.080119	1
Solyc03g112560	SL3.0ch03	64427804	64429804	+	1261	8833	912	7882	12.493	10.371	-2.12186	4.66651e-06	0.100808	3.37589	0.784747	1
Solyc03g112580	SL3.0ch03	64449256	64451256	+	566	5692	356	4931	9.044	6.733	-2.31093	4.59315e-06	-0.114657	2.4105	0.875233	1
Solyc03g112800	SL3.0ch03	64607525	64609525	+	130	974	4	194	11.775	2.02	-9.75516	2.66211e-06	0	-3.87283	1	1
Solyc03g112980	SL3.0ch03	64776752	64778752	-	34	1112	16	981	2.967	1.605	-1.36203	0.0217711	0.854909	1.18286	0.16455	1
Solyc03g112990	SL3.0ch03	64775737	64777737	+	71	1286	55	1740	5.232	3.064	-2.16806	0.00146471	-0.173139	4.34609	0.592341	1
Solyc03g113010	SL3.0ch03	64799830	64801830	-	1871	5531	2068	6689	25.277	23.615	-1.66156	0.00782141	0.242922	5.61255	0.445098	1
Solyc03g113080	SL3.0ch03	64854191	64856191	+	28	1360	4	682	2.017	0.583	-1.4342	0.00693994	0.0280933	2.67933	0.964371	1
Solyc03g113190	SL3.0ch03	64908283	64910283	+	5188	9130	3952	7754	36.234	33.76	-2.47365	2.63244e-05	0.0264977	2.75765	0.955702	1
Solyc03g113210	SL3.0ch03	64913852	64915852	+	814	6225	648	5601	11.564	10.37	-1.19448	0.0144925	-3.03188	-2.31155	0.099784	1
Solyc03g113360	SL3.0ch03	64994772	64996772	-	759	8562	569	7996	8.143	6.643	-1.49959	9.59826e-05	0	-3.91086	1	1
Solyc03g113390	SL3.0ch03	65022153	65024153	+	1061	6641	501	4937	13.776	9.213	-4.5627	2.16807e-15	0.743814	6.92844	0.047328	0.988801
Solyc03g113410	SL3.0ch03	65045861	65047861	+	255	2829	174	2422	8.268	6.703	-1.56586	0.0137204	0.468701	-2.47789	0.778657	1
Solyc03g113460	SL3.0ch03	65084410	65086410	+	6861	6912	5911	6842	49.815	46.35	-3.46498	2.07513e-08	-0.739563	2.6005	0.218205	1
Solyc03g113490	SL3.0ch03	65097991	65099991	+	2925	7987	2245	6475	26.805	25.745	-1.05994	0.0443997	1.08913	-0.679738	0.392098	1
Solyc03g113615	SL3.0ch03	65163470	65165470	-	7	570	2	662	1.213	0.301	-0.911967	0.0419861	0	-3.91086	1	1
Solyc03g113630	SL3.0ch03	65195310	65197310	-	1520	3992	1307	3705	27.576	26.077	-1.49878	0.0400098	-0.0708583	4.81043	0.84228	1
Solyc03g113720	SL3.0ch03	65269444	65271444	-	1601	6541	1278	6559	19.663	16.307	-3.35621	3.83244e-08	0.243746	1.19859	0.764718	1
Solyc03g113790	SL3.0ch03	65324683	65326683	-	106	4086	74	3686	2.529	1.968	-0.560541	0.0447014	-0.346933	5.36425	0.223745	1
Solyc03g113810	SL3.0ch03	65341589	65343589	-	403	7870	286	6756	4.871	4.061	-0.809922	0.00907819	0	-3.91086	1	1
Solyc03g113840	SL3.0ch03	65369145	65371145	-	46	1516	13	1097	2.945	1.171	-1.77377	0.00120813	0	-3.59608	1	1
Solyc03g113930	SL3.0ch03	65460735	65462735	+	1192	6927	948	6063	14.682	13.522	-1.16	0.0207922	0.237166	6.7052	0.735231	1
Solyc03g113970	SL3.0ch03	65508145	65510145	+	4151	9592	3294	8572	30.204	27.76	-2.44448	1.45839e-05	0.00773688	0.459695	1	1
Solyc03g114030	SL3.0ch03	65560964	65562964	-	735	8312	640	8636	8.124	6.9	-1.22471	0.00105853	-0.412158	6.44176	0.335004	1
Solyc03g114080	SL3.0ch03	65608881	65610881	+	1199	4245	740	3908	22.024	15.921	-6.10342	1.46166e-14	-4.61781	-3.61882	0.244648	1
Solyc03g114140	SL3.0ch03	65642409	65644409	-	4631	9974	4349	9772	31.708	30.798	-0.910217	0.0450915	0.203296	6.01008	0.496319	1
Solyc03g114165	SL3.0ch03	65664505	65666505	+	2650	5000	2286	4664	34.641	32.892	-1.74844	0.0134871	0.0837385	-1.59096	0.968402	1
Solyc03g114170	SL3.0ch03	65664505	65666505	+	2650	5000	2286	4664	34.641	32.892	-1.74844	0.0134871	0	-3.91086	1	1
Solyc03g114390	SL3.0ch03	65875457	65877457	-	47	1295	34	1473	3.502	2.256	-1.2461	0.026451	-0.472328	1.39975	0.439774	1
Solyc03g114460	SL3.0ch03	65935048	65937048	+	440	4093	168	2510	9.707	6.273	-3.43326	2.72464e-07	-0.166486	5.71836	0.525674	1
Solyc03g114550	SL3.0ch03	65996133	65998133	-	1619	3258	851	1897	33.197	30.968	-2.22866	0.0230484	-1.25518	-3.3398	0.68865	1
Solyc03g114580	SL3.0ch03	66017625	66019625	-	6316	7783	5332	7344	44.798	42.064	-2.73376	6.03415e-06	-0.138149	5.19163	0.700555	1
Solyc03g114590	SL3.0ch03	66017604	66019604	+	6254	7757	5281	7355	44.636	41.793	-2.84307	2.75316e-06	0.400396	1.09362	0.446175	1
Solyc03g114593	SL3.0ch03	66017628	66019628	+	6314	7799	5328	7350	44.739	42.026	-2.71334	6.75933e-06	0	-3.91086	1	1
Solyc03g114640	SL3.0ch03	66040726	66042726	+	2371	6559	2133	6400	26.551	24.997	-1.55388	0.0103028	-0.55181	3.92159	0.149798	1
Solyc03g114650	SL3.0ch03	66055944	66057944	+	3781	4159	3001	3646	47.62	45.148	-2.47146	0.00182483	-0.756034	-1.6531	0.589856	1
Solyc03g114705	SL3.0ch03	66085017	66087017	+	226	2153	81	1872	9.5	4.147	-5.35232	5.32554e-12	-0.376469	-1.81175	0.907059	1
Solyc03g114750	SL3.0ch03	66141613	66143613	-	1136	2755	1211	3194	29.196	27.491	-1.70409	0.0406278	0.381555	5.30262	0.573649	1
Solyc03g114790	SL3.0ch03	66164585	66166585	+	40	1170	9	683	3.306	1.301	-2.00521	0.00384058	0.106356	4.41956	0.744668	1
Solyc03g114800	SL3.0ch03	66172231	66174231	-	1973	1485	1957	2627	57.056	42.692	-14.3641	2.7379e-36	-0.751811	0.683933	0.424591	1
Solyc03g114860	SL3.0ch03	66235616	66237616	-	203	6370	131	5257	3.088	2.431	-0.657063	0.017144	0.0212039	3.12254	0.981974	1
Solyc03g114875	SL3.0ch03	66241713	66243713	+	26	977	8	607	2.592	1.301	-1.29141	0.04871	0	-3.91086	1	1
Solyc03g114880	SL3.0ch03	66242325	66244325	+	26	765	7	461	3.287	1.496	-1.79125	0.0319749	2.55921	-3.69243	0.600018	1
Solyc03g114920	SL3.0ch03	66268016	66270016	-	153	3257	66	2063	4.487	3.1	-1.38676	0.00586097	0.213558	5.18572	0.429297	1
Solyc03g114930	SL3.0ch03	66266915	66268915	+	128	2420	50	1560	5.024	3.106	-1.91796	0.00167818	-1.08781	2.72802	0.0748288	1
Solyc03g114970	SL3.0ch03	66320228	66322228	-	7994	5956	7587	6611	57.305	53.437	-3.86756	1.02892e-10	0.228321	6.74945	0.596002	1
Solyc03g114980	SL3.0ch03	66319826	66321826	+	7974	5956	7566	6126	57.243	55.259	-1.98481	0.000582911	0.0276039	4.45523	0.929713	1
Solyc03g115005	SL3.0ch03	66340732	66342732	+	1171	2175	1139	2356	34.997	32.589	-2.4076	0.0181094	-0.979645	-2.29124	0.499127	1
Solyc03g115025	SL3.0ch03	66362232	66364232	+	370	3109	281	2853	10.635	8.966	-1.66906	0.0120167	2.66119	-3.00222	0.191177	1
Solyc03g115030	SL3.0ch03	66362232	66364232	+	370	3109	281	2853	10.635	8.966	-1.66906	0.0120167	-0.432338	2.00091	0.448218	1
Solyc03g115160	SL3.0ch03	66446164	66448164	-	536	7141	317	6298	6.982	4.792	-2.18975	3.51355e-08	-0.894478	0.78395	0.182143	1
Solyc03g115167	SL3.0ch03	66459651	66461651	-	72	2359	30	1784	2.962	1.654	-1.30794	0.00349946	-0.0700555	1.91082	0.895272	1
Solyc03g115180	SL3.0ch03	66465348	66467348	+	436	9574	311	9243	4.356	3.255	-1.10046	4.87883e-05	-0.107341	3.11945	0.799829	1
Solyc03g115250	SL3.0ch03	66526054	66528054	+	122	3357	54	2560	3.507	2.066	-1.44096	0.000561523	0.114377	5.14605	0.735029	1
Solyc03g115340	SL3.0ch03	66567292	66569292	-	244	315	254	713	43.649	26.267	-17.3826	9.3865e-12	-0.608552	-3.50977	0.84436	1
Solyc03g115390	SL3.0ch03	66608247	66610247	-	20	684	6	878	2.841	0.679	-2.16218	0.000668876	0.019566	4.82874	0.948941	1
Solyc03g115470	SL3.0ch03	66646460	66648460	+	226	3436	154	3212	6.171	4.575	-1.59633	0.00187838	-0.205881	4.76287	0.485259	1
Solyc03g115480	SL3.0ch03	66654821	66656821	-	904	2614	702	2595	25.696	21.292	-4.40433	1.50486e-05	0	-3.91086	1	1
Solyc03g115490	SL3.0ch03	66655481	66657481	-	904	2592	700	2659	25.858	20.84	-5.01859	8.77226e-07	0.310384	4.21835	0.378611	1
Solyc03g115530	SL3.0ch03	66690660	66692660	-	4504	5126	4132	5480	46.771	42.988	-3.78258	1.50123e-07	0.24189	3.61474	0.553601	1
Solyc03g115540	SL3.0ch03	66694168	66696168	+	2381	5886	1815	4968	28.801	26.758	-2.04319	0.00319284	0.727094	-3.39576	0.738523	1
Solyc03g115580	SL3.0ch03	66723531	66725531	-	137	2773	86	2427	4.708	3.422	-1.2857	0.010332	0.148993	1.83698	0.785025	1
Solyc03g115690	SL3.0ch03	66815202	66817202	-	486	1615	262	1388	23.132	15.879	-7.25305	3.67043e-08	-0.470649	0.275471	0.628304	1
Solyc03g115720	SL3.0ch03	66842367	66844367	-	3982	6731	3516	6250	37.17	36.002	-1.16734	0.0391978	0.0587873	4.93685	0.831295	1
Solyc03g115730	SL3.0ch03	66845004	66847004	+	4555	4053	3952	4255	52.916	48.154	-4.76188	9.11149e-10	-0.167045	3.16021	0.681938	1
Solyc03g115780	SL3.0ch03	66876301	66878301	-	414	756	414	1437	35.385	22.366	-13.0183	2.3064e-14	0.430605	0.838805	0.626562	1
Solyc03g115800	SL3.0ch03	66876667	66878667	+	174	1070	198	1501	13.987	11.654	-2.33322	0.0306087	0.430994	-0.2896	0.602699	1
Solyc03g115843	SL3.0ch03	66912431	66914431	-	76	3924	30	2715	1.9	1.093	-0.807104	0.00521068	-1.00692	0.148628	0.112406	1
Solyc03g115870	SL3.0ch03	66951811	66953811	+	366	2285	164	1796	13.806	8.367	-5.43876	9.73443e-09	-1.75565	4.35115	0.000103836	0.019445
Solyc03g115890	SL3.0ch03	66969755	66971755	+	1115	1191	886	1473	48.352	37.558	-10.7938	2.10459e-13	0.222326	0.618751	0.805196	1
Solyc03g116030	SL3.0ch03	67037479	67039479	+	946	4669	886	5141	16.848	14.701	-2.14721	0.00100047	0.28846	3.23264	0.57024	1
Solyc03g116140	SL3.0ch03	67117607	67119607	+	1396	2031	1345	2140	40.735	38.594	-2.14136	0.0327898	0.315799	4.44422	0.283186	1
Solyc03g116170	SL3.0ch03	67138251	67140251	+	2503	3692	2413	4013	40.404	37.551	-2.85298	0.000701177	-0.0268324	5.50954	0.94718	1
Solyc03g116190	SL3.0ch03	67176432	67178432	-	2486	3887	1885	3562	39.008	34.606	-4.40211	7.86822e-07	3.26225	1.28101	0.00503262	0.316913
Solyc03g116225	SL3.0ch03	67200554	67202554	+	678	6725	406	5037	9.158	7.459	-1.69933	0.000439415	-0.217869	9.57061	0.652396	1
Solyc03g116290	SL3.0ch03	67251085	67253085	+	91	826	58	722	9.924	7.436	-2.48777	0.0395971	0.0814166	-3.79985	1	1
Solyc03g116340	SL3.0ch03	67303882	67305882	+	38	1830	13	1593	2.034	0.809	-1.2248	0.00167439	-0.350147	7.73225	0.407814	1
Solyc03g116390	SL3.0ch03	67342705	67344705	-	154	3282	132	3563	4.482	3.572	-0.909561	0.0259357	0.291887	2.84207	0.610063	1
Solyc03g116440	SL3.0ch03	67357030	67359030	+	1730	3302	1638	3713	34.38	30.611	-3.76887	3.37225e-05	0	-3.83701	1	1
Solyc03g116470	SL3.0ch03	67369256	67371256	-	5961	6575	5355	6407	47.551	45.528	-2.02308	0.0010213	-1.12534	-0.734558	0.201867	1
Solyc03g116530	SL3.0ch03	67398567	67400567	-	508	4220	432	4501	10.745	8.757	-1.98715	0.000710554	-0.423206	4.65671	0.194784	1
Solyc03g116580	SL3.0ch03	67424207	67426207	-	96	1633	13	548	5.552	2.317	-3.23505	0.000814494	-0.525131	-2.43586	1	1
Solyc03g116590	SL3.0ch03	67424207	67426207	-	96	1633	13	548	5.552	2.317	-3.23505	0.000814494	-0.262088	2.12704	0.592422	1
Solyc03g116630	SL3.0ch03	67447922	67449922	+	871	4262	719	4073	16.969	15.004	-1.96446	0.00446464	0.0178839	5.489	0.970795	1
Solyc03g116650	SL3.0ch03	67458238	67460238	+	549	1975	340	1459	21.751	18.899	-2.8518	0.0126063	0	-3.91086	1	1
Solyc03g116750	SL3.0ch03	67525804	67527804	-	2697	2607	2174	2439	50.848	47.128	-3.72073	0.000163231	0.256766	7.40213	0.373091	1
Solyc03g116770	SL3.0ch03	67537443	67539443	+	1982	6588	1586	6000	23.127	20.907	-2.22025	0.000477081	-0.116769	2.11825	0.849446	1
Solyc03g116860	SL3.0ch03	67604681	67606681	-	863	6542	594	5291	11.654	10.093	-1.56083	0.00256999	0	-3.31757	1	1
Solyc03g116890	SL3.0ch03	67626540	67628540	-	1660	4432	1130	4028	27.249	21.908	-5.34113	9.66159e-11	0.148797	6.96075	0.841665	1
Solyc03g116975	SL3.0ch03	67735083	67737083	-	3361	7542	507	2024	30.826	20.032	-10.7948	8.38269e-28	3.49844	-3.72725	0.268257	1
Solyc03g117020	SL3.0ch03	67769911	67771911	+	4638	7751	2215	4634	37.436	32.34	-5.09595	2.59646e-12	0.388578	6.22148	0.138977	1
Solyc03g117050	SL3.0ch03	67797259	67799259	+	4044	3085	2473	3317	56.726	42.712	-14.0145	3.90323e-55	-0.194633	-0.857109	0.89542	1
Solyc03g117070	SL3.0ch03	67816940	67818940	+	2426	8480	1454	6110	22.245	19.223	-3.022	6.83477e-07	-1.69159	-2.01911	0.348721	1
Solyc03g117150	SL3.0ch03	67865391	67867391	+	2249	3229	626	1086	41.055	36.565	-4.48971	0.000615732	-1.91483	-1.56323	0.107139	1
Solyc03g117200	SL3.0ch03	67886276	67888276	+	8101	9389	2925	4700	46.318	38.361	-7.95724	8.35798e-31	-0.207379	4.36355	0.498535	1
Solyc03g117220	SL3.0ch03	67904217	67906217	-	4554	8407	1297	5222	35.136	19.896	-15.2405	9.92779e-109	0	-3.82946	1	1
Solyc03g117250	SL3.0ch03	67923442	67925442	-	1482	4095	736	3174	26.573	18.824	-7.7499	3.02221e-18	0	-3.91086	1	1
Solyc03g117280	SL3.0ch03	67941004	67943004	+	793	8296	236	4586	8.725	4.894	-3.8306	7.8054e-17	-0.411796	6.84415	0.328007	1
Solyc03g117310	SL3.0ch03	67963706	67965706	-	197	1449	69	1113	11.968	5.838	-6.13084	2.55103e-08	1.99514	2.67573	0.0192217	0.661164
Solyc03g117390	SL3.0ch03	68028399	68030399	+	154	4146	93	3192	3.581	2.831	-0.750345	0.0366072	-0.011569	-0.383705	1	1
Solyc03g117420	SL3.0ch03	68053906	68055906	-	877	1926	7	872	31.288	0.796	-30.4915	1.44469e-106	0.710424	9.17553	0.0885325	1
Solyc03g117480	SL3.0ch03	68113304	68115304	-	6116	7282	5244	6984	45.649	42.885	-2.76342	7.53373e-06	0.00265984	7.91002	0.993792	1
Solyc03g117500	SL3.0ch03	68127642	68129642	+	6147	6227	5266	5570	49.677	48.597	-1.07947	0.0470948	0.902889	2.85965	0.0800481	1
Solyc03g117600	SL3.0ch03	68197926	68199926	+	1097	8392	490	5414	11.561	8.299	-3.2613	1.00969e-10	-0.428913	2.96895	0.384441	1
Solyc03g117640	SL3.0ch03	68215185	68217185	-	6448	8181	2304	4895	44.077	32.004	-12.0724	6.6985e-65	0.325491	2.00228	0.570603	1
Solyc03g117650	SL3.0ch03	68216613	68218613	+	8620	7889	2164	2363	52.214	47.802	-4.41187	1.56252e-07	0.0658689	3.92019	0.834772	1
Solyc03g117670	SL3.0ch03	68232190	68234190	+	189	2749	17	1145	6.433	1.463	-4.96995	9.25727e-13	-0.270416	3.0027	0.524631	1
Solyc03g117675	SL3.0ch03	68238896	68240896	-	381	7032	196	5993	5.14	3.167	-1.97271	1.3829e-08	-1.63722	5.90329	0.000159219	0.0264881
Solyc03g117700	SL3.0ch03	68251652	68253652	-	276	3890	157	3557	6.625	4.227	-2.39781	2.72623e-06	2.48764	-2.01637	0.0898122	1
Solyc03g117720	SL3.0ch03	68257121	68259121	+	2477	11376	822	5409	17.881	13.192	-4.6885	1.08483e-16	1.00154	0.257604	0.197428	1
Solyc03g117740	SL3.0ch03	68268994	68270994	+	908	1411	2973	5683	39.155	34.346	-4.80869	1.52975e-05	-0.691537	4.43746	0.0254594	0.756396
Solyc03g117780	SL3.0ch03	68295793	68297793	-	3463	4506	2660	4729	43.456	35.999	-7.45643	1.66886e-20	-0.0311778	6.11009	0.910882	1
Solyc03g117870	SL3.0ch03	68368800	68370800	-	408	7616	278	6320	5.085	4.213	-0.871348	0.00723203	-0.677784	7.74603	0.0652711	1
Solyc03g118000	SL3.0ch03	68472635	68474635	-	130	3117	35	2512	4.004	1.374	-2.62953	1.0225e-09	0.331761	2.02569	0.697557	1
Solyc03g118030	SL3.0ch03	68508190	68510190	-	301	2123	267	2273	12.417	10.512	-1.90568	0.0181406	0.124988	5.93008	0.618919	1
Solyc03g118090	SL3.0ch03	68549895	68551895	-	2267	8899	1883	8199	20.303	18.677	-1.62585	0.00175071	0.415265	6.01926	0.401232	1
Solyc03g118450	SL3.0ch03	68809196	68811196	-	830	5369	368	4932	13.389	6.943	-6.44586	1.99221e-29	-0.410901	2.54199	0.697413	1
Solyc03g118455	SL3.0ch03	68808506	68810506	+	809	4417	357	4247	15.48	7.754	-7.72616	4.44553e-32	-1.90337	-3.76085	1	1
Solyc03g118470	SL3.0ch03	68812950	68814950	+	5945	9039	4605	7363	39.676	38.478	-1.19805	0.0226015	-0.32159	7.63966	0.571396	1
Solyc03g118490	SL3.0ch03	68821455	68823455	+	612	1722	335	1540	26.221	17.867	-8.35441	1.39745e-10	-0.791979	-0.123812	0.455133	1
Solyc03g118560	SL3.0ch03	68922018	68924018	+	22	832	10	732	2.576	1.348	-1.2284	0.0484635	0	-3.91086	1	1
Solyc03g118650	SL3.0ch03	69004284	69006284	+	61	1779	19	1041	3.315	1.792	-1.52276	0.00957324	0.0343519	5.88842	0.912377	1
Solyc03g118960	SL3.0ch03	69195029	69197029	-	3906	4400	3796	4923	47.026	43.537	-3.48914	4.49959e-06	1.1102	-1.78992	0.315516	1
Solyc03g119060	SL3.0ch03	69254601	69256601	+	2495	7698	1660	6840	24.478	19.529	-4.94817	1.20159e-15	-0.487093	6.23284	0.131913	1
Solyc03g119305	SL3.0ch03	69430801	69432801	+	1165	5536	752	3918	17.385	16.103	-1.28268	0.0353022	-0.392475	2.28563	0.410895	1
Solyc03g119380	SL3.0ch03	69494199	69496199	-	7272	9148	5526	7340	44.287	42.95	-1.33704	0.0118451	-0.0277159	5.52875	0.919883	1
Solyc03g119580	SL3.0ch03	69622625	69624625	-	954	7238	846	7091	11.646	10.659	-0.986569	0.0236536	0	-3.91086	1	1
Solyc03g119625	SL3.0ch03	69672959	69674959	+	60	1512	36	2091	3.817	1.693	-2.12427	6.73617e-05	0	-3.91086	1	1
Solyc03g119690	SL3.0ch03	69725947	69727947	-	2107	9119	1863	8532	18.769	17.922	-0.846851	0.0499584	0	-3.91086	1	1
Solyc03g119800	SL3.0ch03	69856044	69858044	-	1088	4375	1023	4648	19.916	18.039	-1.87665	0.00653596	2.52921	-3.8387	0.667547	1
Solyc03g119810	SL3.0ch03	69870213	69872213	+	544	8121	419	6997	6.278	5.65	-0.628184	0.0441394	0.26988	-0.237285	0.750416	1
Solyc03g119950	SL3.0ch03	69962112	69964112	-	133	2845	57	1890	4.466	2.928	-1.5385	0.00364553	0	-3.91086	1	1
Solyc03g120070	SL3.0ch03	70048740	70050740	+	47	150	5	100	23.858	4.762	-19.096	8.80975e-06	0.262335	0.889233	0.677176	1
Solyc03g120100	SL3.0ch03	70074749	70076749	-	20	954	10	980	2.053	1.01	-1.04329	0.0318249	1.58018	-0.473372	0.100251	1
Solyc03g120210	SL3.0ch03	70159832	70161832	+	1469	10350	1068	8095	12.429	11.656	-0.773568	0.0424872	0	-3.91086	1	1
Solyc03g120240	SL3.0ch03	70176137	70178137	+	137	4616	103	4632	2.882	2.175	-0.7071	0.0157004	-0.0838777	5.28404	0.745012	1
Solyc03g120420	SL3.0ch03	70304126	70306126	+	463	1744	330	2013	20.979	14.085	-6.8942	1.29365e-09	1.0227	0.555925	0.210695	1
Solyc03g120475	SL3.0ch03	70344306	70346306	-	2980	8400	2706	8077	26.186	25.095	-1.09123	0.0310173	-0.759257	1.90134	0.396834	1
Solyc03g120590	SL3.0ch03	70432001	70434001	+	168	4985	33	1569	3.26	2.06	-1.20031	0.0077548	1.00493	-1.234	0.35662	1
Solyc03g120885	SL3.0ch03	70598505	70600505	-	2994	8149	2641	7855	26.869	25.162	-1.70692	0.0025682	0	-3.91086	1	1
Solyc03g120890	SL3.0ch03	70608822	70610822	-	2496	8345	665	8304	23.024	7.414	-15.6093	3.59651e-206	0.184303	2.43611	0.726541	1
Solyc03g120990	SL3.0ch03	70697307	70699307	+	805	5212	711	5076	13.379	12.286	-1.0926	0.0368026	0.399568	4.91306	0.497667	1
Solyc03g121090	SL3.0ch03	70798539	70800539	-	1867	11120	1512	9649	14.376	13.547	-0.828741	0.0313224	0	-3.91086	1	1
Solyc03g121120	SL3.0ch03	70826693	70828693	-	4991	7557	4676	7858	39.775	37.307	-2.46874	4.68356e-05	-0.124075	4.19312	0.68652	1
Solyc03g121200	SL3.0ch03	70855736	70857736	-	105	1896	64	1905	5.247	3.25	-1.997	0.00129905	0	-3.72582	1	1
Solyc03g121220	SL3.0ch03	70859592	70861592	+	67	2933	41	2837	2.233	1.425	-0.808733	0.0129808	0	-3.91086	1	1
Solyc03g121240	SL3.0ch03	70890865	70892865	-	1138	7470	931	7797	13.22	10.667	-2.55344	2.27333e-07	2.62318	-3.47572	0.348378	1
Solyc03g121400	SL3.0ch03	70990994	70992994	-	1152	8872	900	8130	11.492	9.967	-1.52564	0.000459616	0.59623	5.06992	0.166133	1
Solyc03g121430	SL3.0ch03	71022218	71024218	+	2183	7217	1867	6671	23.223	21.867	-1.35646	0.0155575	0.879381	-3.44383	0.77991	1
Solyc03g121510	SL3.0ch03	71086480	71088480	-	3983	4809	3271	4657	45.303	41.259	-4.04372	1.46941e-07	0	-3.91086	1	1
Solyc03g121630	SL3.0ch03	71214933	71216933	-	1883	10083	1564	9245	15.736	14.469	-1.26683	0.00457287	-0.152741	4.41803	0.616142	1
Solyc03g121670	SL3.0ch03	71258412	71260412	-	911	8733	671	7022	9.446	8.722	-0.724073	0.0481765	0.34024	3.44871	0.314505	1
Solyc03g121680	SL3.0ch03	71258694	71260694	+	1570	9807	1103	7893	13.8	12.261	-1.53877	0.000825024	1.22164	-2.66194	0.755634	1
Solyc03g121780	SL3.0ch03	71323486	71325486	+	3677	6924	3207	6832	34.685	31.945	-2.73999	2.48087e-05	-0.58189	-1.33138	0.535942	1
Solyc03g121930	SL3.0ch03	71422478	71424478	-	682	1643	681	2176	29.333	23.836	-5.49714	7.54117e-06	0.325376	1.27091	0.599059	1
Solyc03g121960	SL3.0ch03	71446985	71448985	-	808	6830	599	6064	10.579	8.99	-1.58874	0.000932553	0.339558	6.27546	0.236164	1
Solyc03g122080	SL3.0ch03	71532637	71534637	+	145	803	7	183	15.295	3.684	-11.6111	1.96832e-06	0.869139	-1.12672	0.499893	1
Solyc03g122270	SL3.0ch03	71634508	71636508	-	1479	10149	1219	9016	12.719	11.91	-0.809186	0.0331955	-0.229344	7.55524	0.47473	1
Solyc03g122300	SL3.0ch03	71654059	71656059	+	1943	9889	1533	9174	16.422	14.318	-2.10383	1.09112e-05	0.184053	5.70983	0.622557	1
Solyc03g122320	SL3.0ch03	71670620	71672620	+	903	4717	661	5663	16.068	10.452	-5.61537	3.79442e-19	0	-3.91086	1	1
Solyc03g123420	SL3.0ch03	71777082	71779082	-	4957	4596	4266	4181	51.889	50.503	-1.38632	0.0306356	0.141825	3.94335	0.668911	1
Solyc03g123490	SL3.0ch03	71819299	71821299	+	1401	10116	1174	9226	12.165	11.288	-0.876165	0.0226622	0.238574	6.47037	0.463319	1
Solyc03g123540	SL3.0ch03	71869785	71871785	-	449	2939	242	2146	13.253	10.134	-3.11865	0.000234465	0.283681	3.67705	0.689767	1
Solyc03g123760	SL3.0ch03	72000770	72002770	+	1193	1543	1096	1698	43.604	39.227	-4.37689	0.000624231	-0.44339	7.43979	0.205477	1
Solyc03g123860	SL3.0ch03	72051784	72053784	+	296	3065	113	1780	8.807	5.969	-2.83754	0.000149625	0.18006	-0.170197	0.853445	1
Solyc04g005100	SL3.0ch04	78669	80669	+	1677	7540	1459	7199	18.195	16.851	-1.34317	0.0101586	0.164131	7.67931	0.587629	1
Solyc04g005120	SL3.0ch04	83163	85163	+	1006	5812	528	4054	14.755	11.523	-3.23171	6.03263e-07	0.0411453	3.53068	0.908494	1
Solyc04g005230	SL3.0ch04	181894	183894	-	700	6380	528	5426	9.887	8.868	-1.01902	0.0246599	0	-3.91086	1	1
Solyc04g005240	SL3.0ch04	184521	186521	-	374	2999	196	1961	11.088	9.087	-2.00136	0.0097265	0	-3.91086	1	1
Solyc04g005380	SL3.0ch04	268776	270776	+	841	4098	554	3335	17.028	14.245	-2.78243	0.000259957	0.683958	1.56754	0.338073	1
Solyc04g005410	SL3.0ch04	289540	291540	-	1142	4565	1225	5295	20.011	18.788	-1.22217	0.0416043	3.4613	-3.40904	0.339413	1
Solyc04g005500	SL3.0ch04	338889	340889	-	2622	9256	2254	8419	22.074	21.119	-0.955713	0.038802	0.028009	5.04032	0.933176	1
Solyc04g005510	SL3.0ch04	340522	342522	+	2893	8719	2680	8502	24.914	23.967	-0.946792	0.0455548	-0.0720157	5.84733	0.837178	1
Solyc04g005520	SL3.0ch04	351027	353027	-	532	1607	524	1946	24.871	21.215	-3.65686	0.00211301	-0.395004	1.23048	0.606189	1
Solyc04g005570	SL3.0ch04	382941	384941	-	5499	6242	4937	6087	46.836	44.784	-2.05177	0.00120395	-0.208282	0.28652	0.759508	1
Solyc04g005620	SL3.0ch04	409722	411722	-	823	2652	218	1576	23.683	12.152	-11.5318	5.81697e-24	0.804496	-1.81985	0.498649	1
Solyc04g005670	SL3.0ch04	441972	443972	+	4930	9661	3854	9000	33.788	29.983	-3.80507	2.46905e-11	0.158836	7.72927	0.717231	1
Solyc04g005820	SL3.0ch04	528642	530642	-	224	2279	124	1740	8.949	6.652	-2.2969	0.00325867	-0.239822	3.58299	0.468017	1
Solyc04g006960	SL3.0ch04	653345	655345	-	1599	10693	1352	9692	13.008	12.242	-0.766519	0.0372073	0.150803	2.25275	0.761363	1
Solyc04g007020	SL3.0ch04	741769	743769	-	326	1377	174	1136	19.143	13.282	-5.86025	1.38974e-05	0.283115	7.57469	0.31919	1
Solyc04g007040	SL3.0ch04	762335	764335	-	5645	9739	4968	9074	36.694	35.38	-1.31439	0.0103632	0	-3.91086	1	1
Solyc04g007050	SL3.0ch04	761875	763875	+	3763	10415	3103	9198	26.541	25.226	-1.31553	0.00809524	1.78829	-3.87428	1	1
Solyc04g007090	SL3.0ch04	804562	806562	-	8	79	2	91	9.195	2.151	-7.04486	0.0251821	-2.17246	-3.49025	0.526208	1
Solyc04g007170	SL3.0ch04	871573	873573	+	2313	5079	1799	4226	31.291	29.859	-1.43166	0.0348861	-0.369752	3.53737	0.307731	1
Solyc04g007270	SL3.0ch04	981125	983125	+	2888	3976	2777	4056	42.075	40.641	-1.43359	0.0413885	-0.0237939	5.80864	0.9403	1
Solyc04g007330	SL3.0ch04	1046598	1048598	-	2739	9563	2161	9108	22.265	19.177	-3.08817	6.6605e-09	0.301704	2.31166	0.542564	1
Solyc04g007430	SL3.0ch04	1100881	1102881	+	3320	10978	2613	9176	23.22	22.165	-1.0553	0.0215684	0	-3.91086	1	1
Solyc04g007480	SL3.0ch04	1155483	1157483	+	3786	10165	2754	8016	27.138	25.571	-1.56681	0.00332139	0.207924	-1.67999	0.925593	1
Solyc04g007560	SL3.0ch04	1240315	1242315	+	89	2760	65	2763	3.124	2.298	-0.825459	0.0289942	0.232377	6.65325	0.453302	1
Solyc04g007760	SL3.0ch04	1434135	1436135	+	2008	6531	1657	5732	23.516	22.425	-1.09041	0.0478365	-3.92623	-3.07903	0.367073	1
Solyc04g007767	SL3.0ch04	1452650	1454650	+	1762	7324	1438	6410	19.392	18.323	-1.06933	0.036077	0.76516	2.38198	0.151745	1
Solyc04g007795	SL3.0ch04	1486468	1488468	+	273	1809	246	2023	13.112	10.842	-2.27061	0.0114198	-0.115576	-3.83596	1	1
Solyc04g007810	SL3.0ch04	1495142	1497142	-	454	6476	243	5367	6.551	4.332	-2.21968	6.39645e-08	0	-3.87283	1	1
Solyc04g007870	SL3.0ch04	1542709	1544709	+	4405	9409	3929	8757	31.888	30.971	-0.91679	0.0497149	0.0470023	6.93687	0.87955	1
Solyc04g007950	SL3.0ch04	1599669	1601669	-	1319	8511	1306	9087	13.418	12.566	-0.851958	0.0340804	-1.44232	3.40691	0.0134301	0.559869
Solyc04g008100	SL3.0ch04	1759176	1761176	-	656	8520	606	9230	7.149	6.161	-0.988043	0.00382994	0.513597	5.96419	0.507607	1
Solyc04g008160	SL3.0ch04	1837644	1839644	+	99	2013	35	1400	4.688	2.439	-2.24848	0.000403522	2.19345	-3.05164	0.338417	1
Solyc04g008230	SL3.0ch04	1904871	1906871	-	4602	8731	3615	8218	34.516	30.55	-3.96571	3.41966e-11	-0.221353	0.0187394	0.724543	1
Solyc04g008360	SL3.0ch04	2003578	2005578	+	1710	2077	1630	2450	45.154	39.951	-5.2035	2.8892e-06	0.844041	-2.41083	0.649579	1
Solyc04g008460	SL3.0ch04	2075862	2077862	+	3234	7256	2635	6805	30.829	27.913	-2.91623	5.91663e-06	0.535749	7.65405	0.103907	1
Solyc04g008510	SL3.0ch04	2131690	2133690	+	3068	4095	2751	5342	42.831	33.992	-8.83888	2.43649e-28	0.173454	5.43064	0.525988	1
Solyc04g008530	SL3.0ch04	2152258	2154258	+	4785	9123	3619	8072	34.405	30.955	-3.44922	6.00058e-09	0	-3.91086	1	1
Solyc04g008590	SL3.0ch04	2194101	2196101	+	4952	7927	4422	7411	38.45	37.37	-1.08012	0.0379533	-0.326061	5.43153	0.321228	1
Solyc04g008625	SL3.0ch04	2250235	2252235	-	1539	3531	1571	3892	30.355	28.757	-1.59794	0.0343965	-2.58011	-3.34127	0.596343	1
Solyc04g008650	SL3.0ch04	2278048	2280048	+	1313	8126	934	7214	13.91	11.463	-2.44744	1.17095e-06	-0.614072	3.43063	0.324395	1
Solyc04g008780	SL3.0ch04	2418847	2420847	+	155	1541	31	1298	9.139	2.333	-6.80657	1.71226e-15	0.226459	1.4253	0.63304	1
Solyc04g009100	SL3.0ch04	2630984	2632984	+	1346	4637	552	2384	22.497	18.801	-3.69599	4.47172e-05	0	-3.87229	1	1
Solyc04g009120	SL3.0ch04	2640056	2642056	+	1199	4103	1176	4633	22.614	20.244	-2.36966	0.0014799	1.79548	-3.50801	1	1
Solyc04g009190	SL3.0ch04	2690619	2692619	+	7644	5820	7163	5991	56.774	54.455	-2.3187	0.000106089	0.227351	4.9325	0.517088	1
Solyc04g009220	SL3.0ch04	2708338	2710338	-	712	2815	690	3400	20.187	16.87	-3.31671	0.000150236	0.54563	1.05844	0.324761	1
Solyc04g009230	SL3.0ch04	2711899	2713899	-	2685	8263	2443	7931	24.525	23.549	-0.97577	0.0454166	0.30095	6.16268	0.301277	1
Solyc04g009260	SL3.0ch04	2711622	2713622	+	2690	9172	2389	8876	22.677	21.207	-1.47018	0.00412112	-0.500103	-0.427891	0.559532	1
Solyc04g009280	SL3.0ch04	2735017	2737017	-	33	938	44	2056	3.399	2.095	-1.30332	0.0176743	-1.15148	-0.586594	0.109195	1
Solyc04g009465	SL3.0ch04	2864547	2866547	+	3723	5982	3295	5593	38.362	37.072	-1.28921	0.0339303	0.267508	-1.9635	0.91181	1
Solyc04g009580	SL3.0ch04	2973791	2975791	+	3840	6016	3828	6417	38.961	37.365	-1.59647	0.0106156	-0.142028	4.63533	0.660414	1
Solyc04g009730	SL3.0ch04	3050245	3052245	+	2101	3711	1483	3160	36.149	31.941	-4.20879	5.86226e-06	-0.22828	2.42389	0.687386	1
Solyc04g009790	SL3.0ch04	3094277	3096277	-	1075	5872	688	4494	15.474	13.277	-2.19758	0.000471185	0.599125	-1.49743	0.582462	1
Solyc04g009840	SL3.0ch04	3162060	3164060	+	1459	3164	1442	3568	31.56	28.782	-2.77716	0.00188314	-0.513219	2.03199	0.412096	1
Solyc04g010250	SL3.0ch04	3575748	3577748	+	1408	10401	1136	9701	11.923	10.483	-1.4405	0.000430208	-0.627109	6.69806	0.477478	1
Solyc04g010333	SL3.0ch04	3687098	3689098	+	72	200	55	218	26.471	20.147	-6.32407	0.0399059	0	-3.91086	1	1
Solyc04g011385	SL3.0ch04	3863262	3865262	-	8974	7467	7560	7064	54.583	51.696	-2.88721	3.76836e-07	0.276525	2.0929	0.651111	1
Solyc04g011420	SL3.0ch04	3883763	3885763	-	4453	6338	3715	5905	41.266	38.617	-2.64841	8.79028e-05	-0.0696115	4.88413	0.846877	1
Solyc04g011600	SL3.0ch04	4026643	4028643	+	2491	6246	2315	6149	28.511	27.351	-1.1598	0.04281	0	-3.91086	1	1
Solyc04g011750	SL3.0ch04	4200801	4202801	+	1590	6090	1325	5889	20.703	18.367	-2.33606	0.00024322	0	-0.045506	1	1
Solyc04g011830	SL3.0ch04	4252072	4254072	-	1150	6037	905	5506	16.001	14.116	-1.88475	0.00142779	0	-3.91086	1	1
Solyc04g012000	SL3.0ch04	4345639	4347639	+	24	560	15	862	4.11	1.71	-2.39921	0.00418698	0	-3.79026	1	1
Solyc04g012070	SL3.0ch04	4392592	4394592	+	2283	5693	1826	5053	28.623	26.545	-2.07881	0.0028634	-1.80416	-3.87399	1	1
Solyc04g012100	SL3.0ch04	4410416	4412416	+	63	2321	43	2355	2.643	1.793	-0.849456	0.0242697	1.7883	-3.87428	1	1
Solyc04g012140	SL3.0ch04	4439009	4441009	-	1649	2598	1709	3946	38.827	30.221	-8.60636	1.36491e-18	0	-3.91086	1	1
Solyc04g014210	SL3.0ch04	4507403	4509403	+	308	3483	328	4454	8.125	6.859	-1.26545	0.0143063	0.117499	5.98902	0.731357	1
Solyc04g014520	SL3.0ch04	4793239	4795239	+	3541	10464	2723	8584	25.284	24.082	-1.2014	0.0143718	-3.66701	-3.75752	0.44114	1
Solyc04g014540	SL3.0ch04	4810327	4812327	+	1182	6492	945	6477	15.403	12.732	-2.67024	2.31458e-06	0.203875	4.67169	0.459702	1
Solyc04g014680	SL3.0ch04	4943199	4945199	-	1415	846	1174	802	62.583	59.413	-3.16997	0.0186049	-0.354405	5.66482	0.326799	1
Solyc04g014775	SL3.0ch04	5025778	5027778	+	3374	4768	2693	4455	41.439	37.675	-3.76458	1.9868e-06	0	-3.91086	1	1
Solyc04g014830	SL3.0ch04	5070491	5072491	-	412	4886	335	5115	7.777	6.147	-1.62973	0.000624647	-0.595617	4.21871	0.230195	1
Solyc04g015200	SL3.0ch04	5384502	5386502	-	2104	10219	1527	8294	17.074	15.548	-1.52545	0.00148945	0.312527	4.3332	0.391634	1
Solyc04g015500	SL3.0ch04	5713811	5715811	+	2459	2080	2147	2043	54.175	51.241	-2.93388	0.0036932	0.141766	3.96396	0.706867	1
Solyc04g015560	SL3.0ch04	5816406	5818406	+	7157	7758	6051	7231	47.985	45.558	-2.42735	3.5678e-05	-0.306733	6.04063	0.339877	1
Solyc04g015570	SL3.0ch04	5859254	5861254	+	5680	6463	4627	5592	46.776	45.278	-1.49752	0.0131457	-0.125229	2.68536	0.810191	1
Solyc04g015710	SL3.0ch04	6013435	6015435	-	808	4586	836	5211	14.98	13.825	-1.15457	0.0386509	0.320459	-0.198475	0.692459	1
Solyc04g015950	SL3.0ch04	6486016	6488016	+	264	2961	255	3382	8.186	7.011	-1.17477	0.032155	-0.360414	3.57567	0.301229	1
Solyc04g015970	SL3.0ch04	6511720	6513720	+	3771	9489	2811	7887	28.439	26.276	-2.16297	0.000139929	0.0418643	5.42562	0.894021	1
Solyc04g016040	SL3.0ch04	6706555	6708555	+	2172	7333	1599	6100	22.851	20.769	-2.0822	0.000674042	1.90128	-3.87171	1	1
Solyc04g016060	SL3.0ch04	6735871	6737871	-	639	5623	498	5400	10.204	8.444	-1.76087	0.000560645	-0.147399	-2.50916	0.981822	1
Solyc04g016120	SL3.0ch04	6845496	6847496	+	2869	7396	1921	5894	27.949	24.581	-3.36841	3.65049e-07	0	-3.91086	1	1
Solyc04g016150	SL3.0ch04	6893419	6895419	-	196	3324	40	1582	5.568	2.466	-3.10209	2.82766e-07	2.77306	-3.83179	0.672991	1
Solyc04g016370	SL3.0ch04	7185205	7187205	-	3553	3543	2850	3112	50.07	47.803	-2.26771	0.00571146	0.116063	4.70559	0.70232	1
Solyc04g016490	SL3.0ch04	7315850	7317850	-	3005	8060	2389	6999	27.158	25.447	-1.71032	0.00339994	-0.815966	-0.290228	0.458852	1
Solyc04g016530	SL3.0ch04	7364173	7366173	-	287	4787	231	4506	5.656	4.877	-0.779783	0.0401117	-0.245696	3.84388	0.464761	1
Solyc04g016550	SL3.0ch04	7387756	7389756	-	4163	6502	3474	5711	39.034	37.823	-1.21169	0.0382572	-0.62619	2.83819	0.128865	1
Solyc04g016560	SL3.0ch04	7387756	7389756	-	4163	6502	3474	5711	39.034	37.823	-1.21169	0.0382572	1.74798	-3.45909	0.548668	1
Solyc04g017750	SL3.0ch04	7968266	7970266	-	3243	8092	3018	8094	28.61	27.16	-1.45067	0.00853609	-0.0365418	4.53006	0.902077	1
Solyc04g018020	SL3.0ch04	8996972	8998972	+	821	4664	528	3317	14.968	13.732	-1.23598	0.0459319	0	-3.91086	1	1
Solyc04g018130	SL3.0ch04	9610481	9612481	-	999	4393	617	3593	18.527	14.656	-3.87187	4.75162e-07	0.572851	0.507165	0.415292	1
Solyc04g019310	SL3.0ch04	11573326	11575326	+	1577	6978	1329	6691	18.434	16.571	-1.86259	0.00103741	-0.803284	-2.06077	0.569684	1
Solyc04g040180	SL3.0ch04	11957992	11959992	+	5630	11509	4908	10443	32.849	31.972	-0.877199	0.0425796	1.23398	7.87727	0.0197608	0.66869
Solyc04g040000	SL3.0ch04	12310880	12312880	+	3305	4776	3088	5166	40.898	37.412	-3.48624	4.61989e-06	-0.264528	2.02357	0.593716	1
Solyc04g039940	SL3.0ch04	12369355	12371355	+	19	834	7	717	2.227	0.967	-1.26058	0.0342155	-0.0156438	3.26272	0.967649	1
Solyc04g039920	SL3.0ch04	12383000	12385000	+	4457	8315	3308	7734	34.897	29.958	-4.93831	1.23577e-15	3.21765	-3.52188	0.50972	1
Solyc04g028380	SL3.0ch04	16269546	16271546	-	943	6861	815	6954	12.084	10.49	-1.59314	0.00106287	0	-3.91086	1	1
Solyc04g026100	SL3.0ch04	18865255	18867255	-	57	297	22	249	16.102	8.118	-7.98361	0.00202754	-0.0912944	7.26947	0.802306	1
Solyc04g026055	SL3.0ch04	19115089	19117089	-	2268	4992	1979	4748	31.24	29.419	-1.82091	0.0102756	0	-3.91086	1	1
Solyc04g026020	SL3.0ch04	19750215	19752215	-	709	6072	552	5493	10.456	9.132	-1.32417	0.00687252	-1.23344	1.58812	0.116489	1
Solyc04g025993	SL3.0ch04	20041888	20043888	-	1687	8255	1497	8081	16.968	15.63	-1.33885	0.00646493	2.52924	-3.8387	0.667464	1
Solyc04g025740	SL3.0ch04	21172662	21174662	+	3108	3548	3042	3979	46.695	43.327	-3.36755	5.82309e-05	0	-3.91086	1	1
Solyc04g025730	SL3.0ch04	21201693	21203693	-	519	6288	401	5505	7.625	6.79	-0.834799	0.0351121	0.626245	-1.77424	0.691118	1
Solyc04g025473	SL3.0ch04	22793968	22795968	-	1057	7290	672	5113	12.663	11.616	-1.04698	0.0305789	0.646369	1.45551	0.235324	1
Solyc04g025475	SL3.0ch04	22794954	22796954	-	487	5089	282	3721	8.734	7.045	-1.68914	0.00177634	0.297645	1.19314	0.55252	1
Solyc04g025130	SL3.0ch04	25383697	25385697	-	45	2352	22	2017	1.877	1.079	-0.798386	0.017727	1.90127	-3.87171	1	1
Solyc04g025070	SL3.0ch04	25858134	25860134	+	469	6558	408	6736	6.674	5.711	-0.96317	0.00944093	0	-3.91086	1	1
Solyc04g024990	SL3.0ch04	26729160	26731160	-	265	6132	206	6181	4.143	3.225	-0.917265	0.00368852	0	-3.91086	1	1
Solyc04g024960	SL3.0ch04	27280703	27282703	+	2702	7279	2790	7907	27.071	26.082	-0.989357	0.0493013	0.254378	1.69083	0.698125	1
Solyc04g024880	SL3.0ch04	27803109	27805109	+	82	288	31	192	22.162	13.901	-8.26082	0.00717209	0	-3.91086	1	1
Solyc04g024520	SL3.0ch04	30310671	30312671	-	3950	10448	3542	9848	27.434	26.453	-0.981789	0.0314493	0.269882	2.86345	0.520312	1
Solyc04g047723	SL3.0ch04	35898266	35900266	-	42	1330	12	1003	3.061	1.182	-1.87896	0.00126126	0.553978	-3.31391	1	1
Solyc04g048980	SL3.0ch04	38711121	38713121	-	1473	11379	1067	9599	11.461	10.004	-1.4575	0.00023278	0	-3.91086	1	1
Solyc04g049270	SL3.0ch04	41266551	41268551	-	1233	6705	801	6209	15.533	11.427	-4.10635	4.55859e-13	0	-3.91086	1	1
Solyc04g049330	SL3.0ch04	41435746	41437746	+	3111	8871	3198	9560	25.964	25.067	-0.897321	0.0494455	-0.00532051	7.47656	0.986086	1
Solyc04g049400	SL3.0ch04	41768085	41770085	-	2690	8993	1963	7151	23.025	21.538	-1.48662	0.00597437	0	-3.91086	1	1
Solyc04g049440	SL3.0ch04	41836404	41838404	-	1187	8525	1090	8492	12.222	11.375	-0.846498	0.0335547	0	-3.87342	1	1
Solyc04g049650	SL3.0ch04	42700720	42702720	-	84	837	31	843	9.121	3.547	-5.57361	1.02665e-06	-0.114495	-0.430787	0.893478	1
Solyc04g049803	SL3.0ch04	43525169	43527169	-	1225	6235	980	5852	16.421	14.344	-2.07665	0.000404481	0	-3.91086	1	1
Solyc04g049920	SL3.0ch04	44732032	44734032	+	1193	4209	820	3150	22.084	20.655	-1.4295	0.0451429	-1.59511	0.862682	0.205139	1
Solyc04g050040	SL3.0ch04	45201173	45203173	-	2079	8783	1612	7831	19.14	17.071	-2.06928	0.000101041	-0.114854	4.3174	0.745796	1
Solyc04g050110	SL3.0ch04	45519069	45521069	-	1866	4545	1793	5426	29.106	24.837	-4.26899	2.51261e-08	0	-3.91086	1	1
Solyc04g050140	SL3.0ch04	45587734	45589734	+	2619	5372	2540	5689	32.774	30.866	-1.90792	0.00525112	0.0823862	3.14506	0.864409	1
Solyc04g050410	SL3.0ch04	46951465	46953465	-	716	4615	425	3170	13.431	11.822	-1.6089	0.0133226	1.78829	-3.87428	1	1
Solyc04g050620	SL3.0ch04	47629754	47631754	-	5174	6144	4555	5836	45.715	43.836	-1.87878	0.00322604	-1.21322	4.8055	0.202409	1
Solyc04g050680	SL3.0ch04	47954119	47956119	-	55	3057	25	2178	1.767	1.135	-0.632536	0.0321513	0	-3.91086	1	1
Solyc04g050720	SL3.0ch04	47982259	47984259	+	51	1507	18	1048	3.273	1.689	-1.58487	0.00698859	0.102959	1.7608	0.8338	1
Solyc04g050750	SL3.0ch04	48127337	48129337	-	1366	7743	1029	6433	14.996	13.79	-1.20629	0.01436	-2.58587	-2.9761	0.0484466	0.997603
Solyc04g051103	SL3.0ch04	49596546	49598546	-	1234	4401	1069	4379	21.899	19.622	-2.27697	0.00191799	0.268231	0.461172	0.625014	1
Solyc04g051287	SL3.0ch04	50229880	50231880	+	316	1790	468	3026	15.005	13.394	-1.61036	0.0438956	-1.17357	-2.30444	0.468054	1
Solyc04g051330	SL3.0ch04	50289247	50291247	+	3100	6261	2363	5628	33.116	29.571	-3.54535	5.57815e-07	0	-3.91086	1	1
Solyc04g051370	SL3.0ch04	50385824	50387824	-	1895	6854	1349	5252	21.66	20.436	-1.22332	0.0316323	0.17151	7.4278	0.504112	1
Solyc04g051390	SL3.0ch04	50421399	50423399	-	3083	7126	2623	6578	30.199	28.508	-1.69107	0.00561726	1.44659	-1.04679	0.0255036	0.756396
Solyc04g051427	SL3.0ch04	50492382	50494382	-	6468	9039	5210	8235	41.71	38.75	-2.95973	3.14435e-07	2.69995	-3.6208	0.63121	1
Solyc04g051460	SL3.0ch04	50506540	50508540	+	2039	9827	1728	8934	17.184	16.207	-0.976459	0.0250647	-0.134316	0.106923	0.894831	1
Solyc04g051510	SL3.0ch04	50657798	50659798	+	3618	6677	3182	6191	35.143	33.949	-1.1947	0.0371635	-0.0618674	5.67165	0.896604	1
Solyc04g051660	SL3.0ch04	50889714	50891714	-	3541	9930	3348	9844	26.286	25.379	-0.907078	0.0430971	-0.272366	3.34296	0.481157	1
Solyc04g053020	SL3.0ch04	51247564	51249564	-	28	445	18	872	5.92	2.022	-3.89719	0.000172317	-0.0337305	-3.79748	1	1
Solyc04g053098	SL3.0ch04	51536252	51538252	+	2344	5325	1894	5737	30.565	24.82	-5.7448	4.85653e-15	0	-3.86778	1	1
Solyc04g053130	SL3.0ch04	51664415	51666415	-	8327	7405	7735	7477	52.93	50.848	-2.08232	0.000176293	0.196202	7.8832	0.535387	1
Solyc04g053145	SL3.0ch04	51698042	51700042	+	4346	10395	3763	9489	29.482	28.396	-1.08668	0.022816	-0.0204785	1.50016	0.982233	1
Solyc04g054225	SL3.0ch04	52059216	52061216	+	1095	3042	618	1978	26.468	23.806	-2.6626	0.00787406	-1.93529	-3.82866	1	1
Solyc04g054310	SL3.0ch04	52227586	52229586	+	1283	9991	1085	9616	11.38	10.139	-1.24093	0.00186291	0.0494475	7.6738	0.890585	1
Solyc04g054410	SL3.0ch04	52422434	52424434	-	3162	7211	2808	6957	30.483	28.756	-1.72722	0.00429225	0.666791	3.419	0.086812	1
Solyc04g054830	SL3.0ch04	53236753	53238753	+	1701	10092	1085	7713	14.424	12.332	-2.09146	1.15312e-05	-1.91132	-0.378351	1	1
Solyc04g054850	SL3.0ch04	53254940	53256940	+	925	4656	715	3978	16.574	15.235	-1.33863	0.0315254	0	-3.91086	1	1
Solyc04g055060	SL3.0ch04	53567655	53569655	+	2692	7731	2017	6971	25.827	22.441	-3.38646	4.45339e-08	-0.695936	-1.04813	0.361875	1
Solyc04g055190	SL3.0ch04	53737186	53739186	+	1856	5078	1282	3951	26.767	24.498	-2.26828	0.00277114	-0.138757	4.8659	0.616369	1
Solyc04g055230	SL3.0ch04	53800145	53802145	+	2399	4795	1382	3671	33.347	27.35	-5.99714	2.29036e-12	1.94385	-0.299145	0.00988946	0.475438
Solyc04g056280	SL3.0ch04	53903766	53905766	+	7259	8407	5923	7386	46.336	44.504	-1.8323	0.00115763	0.105019	5.40577	0.70321	1
Solyc04g056440	SL3.0ch04	54148801	54150801	+	710	8422	662	9136	7.775	6.756	-1.01838	0.00403517	-0.459194	-2.48055	0.886869	1
Solyc04g083140	SL3.0ch04	54590890	54592890	+	1335	5658	1339	6604	19.091	16.858	-2.23291	0.000286584	4.77786	4.44412	0.014317	0.581259
Solyc04g056740	SL3.0ch04	54750555	54752555	-	1657	8992	1187	7471	15.56	13.71	-1.85028	0.000227445	0	-3.91086	1	1
Solyc04g056742	SL3.0ch04	54785698	54787698	-	806	5517	524	4194	12.747	11.106	-1.64071	0.00518679	0	-3.83515	1	1
Solyc04g057850	SL3.0ch04	54883436	54885436	-	197	2866	33	2045	6.432	1.588	-4.84354	6.21748e-18	-0.901443	-3.30478	0.827326	1
Solyc04g057900	SL3.0ch04	54959471	54961471	+	3576	6376	3734	7066	35.932	34.574	-1.3584	0.0207382	0	-3.91086	1	1
Solyc04g057910	SL3.0ch04	54962283	54964283	+	2709	2894	2388	2731	48.349	46.65	-1.69936	0.0381642	1.10006	-2.45666	0.452357	1
Solyc04g057930	SL3.0ch04	54984194	54986194	+	6645	6094	6041	6864	52.163	46.811	-5.35134	2.91897e-17	0.498975	5.69225	0.140743	1
Solyc04g057940	SL3.0ch04	54991732	54993732	+	2653	8826	1823	7498	23.112	19.558	-3.55378	7.19403e-10	-0.356733	2.38418	0.656266	1
Solyc04g057950	SL3.0ch04	55001210	55003210	+	900	5841	653	4687	13.351	12.228	-1.12267	0.0336346	-1.91658	-2.2539	0.236184	1
Solyc04g057980	SL3.0ch04	55040592	55042592	-	87	1407	19	1323	5.823	1.416	-4.4075	3.31871e-10	-1.30965	2.03843	0.0240458	0.734476
Solyc04g058000	SL3.0ch04	55083491	55085491	+	71	979	10	455	6.762	2.151	-4.61137	7.83721e-05	-1.6247	-2.12009	0.356294	1
Solyc04g058140	SL3.0ch04	55177113	55179113	+	979	2663	858	2661	26.881	24.382	-2.49891	0.00858942	0.10886	4.34168	0.740823	1
Solyc04g058170	SL3.0ch04	55198297	55200297	+	1536	7996	936	5423	16.114	14.719	-1.39485	0.00950747	0.662834	3.15755	0.363611	1
Solyc04g058200	SL3.0ch04	55242118	55244118	-	1572	7397	1231	6628	17.527	15.664	-1.86347	0.000781913	-0.0947215	0.808137	0.885469	1
Solyc04g063220	SL3.0ch04	55378857	55380857	-	2136	8334	1549	6893	20.401	18.349	-2.05241	0.00027088	0	-3.91086	1	1
Solyc04g063340	SL3.0ch04	55455728	55457728	+	1765	4847	1013	3422	26.694	22.841	-3.85285	3.98802e-06	0.0699668	1.00357	0.91787	1
Solyc04g064700	SL3.0ch04	55848833	55850833	+	4912	9932	4570	9844	33.091	31.705	-1.38552	0.00638742	0.337934	6.31289	0.25291	1
Solyc04g064710	SL3.0ch04	55866981	55868981	+	4910	9782	4194	8795	33.42	32.289	-1.13069	0.023094	-1.24121	-0.800617	0.311458	1
Solyc04g064760	SL3.0ch04	55915874	55917874	-	1820	8641	1331	7373	17.398	15.292	-2.10613	6.8105e-05	-1.25804	-0.884411	0.206748	1
Solyc04g064890	SL3.0ch04	56054403	56056403	-	41	1226	11	817	3.236	1.329	-1.90749	0.00345813	-0.0482	1.72794	0.935298	1
Solyc04g070985	SL3.0ch04	57926124	57928124	-	19	842	15	1384	2.207	1.072	-1.13454	0.0238122	-0.349593	-1.50241	0.777163	1
Solyc04g071020	SL3.0ch04	57965008	57967008	-	1265	6851	1044	6774	15.586	13.354	-2.2327	5.1459e-05	0	-3.91086	1	1
Solyc04g071120	SL3.0ch04	58124781	58126781	-	838	8429	679	8932	9.043	7.065	-1.97802	6.03461e-07	-0.362668	3.75835	0.440794	1
Solyc04g071203	SL3.0ch04	58221373	58223373	+	5055	6950	4595	6731	42.107	40.57	-1.53709	0.00922194	0	-3.91086	1	1
Solyc04g071220	SL3.0ch04	58250114	58252114	-	2572	6646	1973	5508	27.902	26.373	-1.52845	0.0141969	0	-3.91086	1	1
Solyc04g071207	SL3.0ch04	58250960	58252960	-	2102	6754	1763	6261	23.735	21.972	-1.76374	0.00380167	0	-3.91086	1	1
Solyc04g071290	SL3.0ch04	58305225	58307225	+	15	1087	4	865	1.361	0.46	-0.900862	0.0292238	-0.646472	0.746836	0.369956	1
Solyc04g071350	SL3.0ch04	58356255	58358255	+	1756	5998	1543	5870	22.646	20.815	-1.83159	0.0037763	-0.121228	6.66931	0.648588	1
Solyc04g071440	SL3.0ch04	58504203	58506203	+	3409	8200	2975	8055	29.365	26.972	-2.39325	5.06482e-05	-0.0198755	4.99589	0.950956	1
Solyc04g071480	SL3.0ch04	58552628	58554628	+	2878	9294	2447	9057	23.644	21.271	-2.37357	1.0838e-05	-0.129137	8.759	0.804219	1
Solyc04g071610	SL3.0ch04	58662497	58664497	+	4667	6826	4162	6646	40.607	38.509	-2.09881	0.000898826	0.542499	14.1972	0.0738293	1
Solyc04g071650	SL3.0ch04	58714235	58716235	+	1120	5449	845	5894	17.05	12.539	-4.51083	4.78336e-13	-0.678427	6.91635	0.266928	1
Solyc04g071680	SL3.0ch04	58752937	58754937	-	704	4574	668	4920	13.338	11.954	-1.3842	0.0154357	-0.640364	0.242776	0.466768	1
Solyc04g071715	SL3.0ch04	58776816	58778816	+	6716	8467	5157	6821	44.234	43.054	-1.17975	0.0258618	-0.312383	-0.494068	0.707408	1
Solyc04g071800	SL3.0ch04	58887885	58889885	+	2982	6001	2176	5107	33.196	29.878	-3.31824	5.28114e-06	-2.60389	6.0232	0.000513524	0.0642517
Solyc04g072060	SL3.0ch04	59217195	59219195	-	3966	6414	3740	6602	38.208	36.163	-2.04487	0.00148855	-0.284664	4.73646	0.388677	1
Solyc04g072230	SL3.0ch04	59311475	59313475	-	21	904	7	715	2.27	0.97	-1.30074	0.0260789	-0.322432	3.43036	0.420775	1
Solyc04g072300	SL3.0ch04	59421955	59423955	+	60	2368	21	1287	2.471	1.606	-0.865665	0.0454097	0	-3.91086	1	1
Solyc04g072310	SL3.0ch04	59429895	59431895	-	1062	4926	870	4923	17.735	15.018	-2.71735	5.21103e-05	-1.20395	0.0258748	0.119224	1
Solyc04g072347	SL3.0ch04	59456366	59458366	+	71	2298	51	2359	2.997	2.116	-0.880863	0.026526	0	-3.91086	1	1
Solyc04g072375	SL3.0ch04	59481093	59483093	-	1644	9771	1264	8354	14.402	13.142	-1.26008	0.0048379	0.266736	2.50943	0.802998	1
Solyc04g072410	SL3.0ch04	59517716	59519716	-	5066	8732	4395	7920	36.715	35.688	-1.02728	0.0401801	0.377473	2.49981	0.368483	1
Solyc04g072450	SL3.0ch04	59546641	59548641	-	4860	9291	4152	8930	34.344	31.738	-2.6056	4.43772e-06	0.323767	5.68749	0.333453	1
Solyc04g072470	SL3.0ch04	59573698	59575698	-	4646	8693	3397	6817	34.83	33.258	-1.57192	0.00663578	0.228503	0.48965	0.884266	1
Solyc04g072530	SL3.0ch04	59606512	59608512	+	2105	5367	1878	5358	28.172	25.954	-2.21828	0.00152637	-0.0116076	1.79809	0.985377	1
Solyc04g072580	SL3.0ch04	59641613	59643613	+	7619	6797	6082	5731	52.851	51.486	-1.36535	0.0143238	3.59583	-3.46084	0.416229	1
Solyc04g072700	SL3.0ch04	59743135	59745135	+	2192	8069	1952	8553	21.362	18.582	-2.78081	5.56242e-07	-0.406642	-2.78892	0.86811	1
Solyc04g074070	SL3.0ch04	60163462	60165462	+	3161	4056	2966	4199	43.799	41.396	-2.40369	0.00222242	0	-3.7988	1	1
Solyc04g074120	SL3.0ch04	60217426	60219426	-	1641	5003	1222	4329	24.699	22.014	-2.68492	0.000346589	-0.232702	1.61305	0.641921	1
Solyc04g074130	SL3.0ch04	60216403	60218403	+	2295	6447	1649	5908	26.253	21.821	-4.43175	6.86614e-11	-0.592925	2.58245	0.204385	1
Solyc04g074170	SL3.0ch04	60245904	60247904	+	4479	8981	3889	8975	33.276	30.232	-3.04472	1.25407e-07	0	-3.86883	1	1
Solyc04g074290	SL3.0ch04	60369310	60371310	-	5512	8601	4539	7974	39.056	36.274	-2.78191	2.68097e-06	-0.116712	6.20866	0.790492	1
Solyc04g074390	SL3.0ch04	60461707	60463707	-	596	6227	438	5150	8.735	7.838	-0.896936	0.0344173	2.15105	-2.33862	0.468463	1
Solyc04g074410	SL3.0ch04	60505540	60507540	+	457	2958	393	3191	13.382	10.965	-2.41674	0.00130135	0.176111	8.67487	0.741749	1
Solyc04g074420	SL3.0ch04	60517631	60519631	-	245	2173	86	1469	10.132	5.531	-4.60179	2.0163e-07	-0.423058	5.32553	0.413545	1
Solyc04g074430	SL3.0ch04	60518247	60520247	-	240	1753	86	1134	12.042	7.049	-4.99297	3.83281e-06	-0.0612311	6.72953	0.907612	1
Solyc04g074450	SL3.0ch04	60524782	60526782	-	3566	7136	3087	6534	33.321	32.086	-1.23481	0.0294954	0.0117539	9.21013	0.982185	1
Solyc04g074510	SL3.0ch04	60584548	60586548	+	2379	5113	1930	4585	31.754	29.624	-2.12993	0.00378343	0.0409875	6.70276	0.904437	1
Solyc04g074520	SL3.0ch04	60593397	60595397	-	2369	5395	2004	5427	30.513	26.968	-3.54452	1.33843e-06	-0.0327398	4.00324	0.922011	1
Solyc04g074540	SL3.0ch04	60608727	60610727	+	1323	6235	1040	5766	17.505	15.281	-2.224	0.000235654	0.125326	-1.53409	0.955792	1
Solyc04g074660	SL3.0ch04	60658461	60660461	+	50	2192	19	1495	2.23	1.255	-0.975198	0.0174432	-0.0157175	-3.34226	1	1
Solyc04g074670	SL3.0ch04	60674625	60676625	-	553	5585	459	5327	9.009	7.933	-1.07651	0.0178316	-0.0894347	4.62005	0.742472	1
Solyc04g074680	SL3.0ch04	60686808	60688808	-	936	4488	909	4736	17.257	16.103	-1.15389	0.0492884	0.25155	4.82094	0.757271	1
Solyc04g074820	SL3.0ch04	60827909	60829909	+	316	3715	211	3071	7.839	6.429	-1.41024	0.0107693	-0.400139	-0.780505	0.68342	1
Solyc04g074880	SL3.0ch04	60895359	60897359	+	1078	3856	878	4343	21.848	16.817	-5.0317	1.91575e-10	-1.49333	-2.34707	0.306393	1
Solyc04g074990	SL3.0ch04	60968792	60970792	+	1843	5564	1526	5349	24.882	22.196	-2.6855	0.00012007	-2.47019	-0.260729	0.0190301	0.659563
Solyc04g075010	SL3.0ch04	60992378	60994378	+	685	9065	373	7101	7.026	4.991	-2.03501	3.27493e-08	0	-3.86959	1	1
Solyc04g076010	SL3.0ch04	61029375	61031375	-	3441	8285	2297	6679	29.345	25.59	-3.75458	2.76117e-09	0.0406886	7.45949	0.911216	1
Solyc04g076050	SL3.0ch04	61107611	61109611	+	1760	5085	1308	4725	25.712	21.681	-4.03144	9.48347e-08	-0.00570178	5.04394	0.986377	1
Solyc04g076080	SL3.0ch04	61124536	61126536	-	5854	6112	5513	6088	48.922	47.522	-1.40018	0.0164768	-0.0886663	4.02557	0.812857	1
Solyc04g076150	SL3.0ch04	61183447	61185447	+	278	4517	227	4444	5.798	4.86	-0.937933	0.0218297	0.215097	-2.87035	0.869874	1
Solyc04g076260	SL3.0ch04	61276199	61278199	+	300	3466	264	3572	7.966	6.882	-1.08384	0.0344982	-0.44353	1.63212	0.421878	1
Solyc04g076440	SL3.0ch04	61417613	61419613	-	537	2171	481	2437	19.83	16.484	-3.34624	0.000808224	7.5108	-2.11882	0.00109526	0.115221
Solyc04g076590	SL3.0ch04	61580982	61582982	-	1016	3349	633	2883	23.276	18.003	-5.27265	1.30066e-08	0	-3.91086	1	1
Solyc04g076600	SL3.0ch04	61579743	61581743	+	954	1602	578	1577	37.324	26.821	-10.5026	3.18037e-14	-0.746397	-0.75074	0.388892	1
Solyc04g076650	SL3.0ch04	61635705	61637705	-	107	1786	32	756	5.652	4.061	-1.59149	0.0474979	-2.09003	-0.977302	0.224944	1
Solyc04g076690	SL3.0ch04	61676094	61678094	-	21	449	9	519	4.468	1.705	-2.76354	0.00788185	-0.546204	0.581721	0.33572	1
Solyc04g076695	SL3.0ch04	61680218	61682218	-	27	1542	10	1258	1.721	0.789	-0.932198	0.0157163	1.88996	-3.64649	1	1
Solyc04g076715	SL3.0ch04	61707362	61709362	-	60	2230	10	1329	2.62	0.747	-1.87326	3.47233e-05	-0.175118	-1.65582	0.899403	1
Solyc04g076820	SL3.0ch04	61783646	61785646	-	650	6114	478	5905	9.61	7.489	-2.12106	1.21519e-05	0.476943	6.89364	0.083289	1
Solyc04g076850	SL3.0ch04	61843928	61845928	+	1282	7063	1018	7395	15.362	12.1	-3.26217	1.14932e-09	0.265153	8.66491	0.369902	1
Solyc04g076950	SL3.0ch04	61980247	61982247	-	232	2881	161	2635	7.453	5.758	-1.69439	0.00572663	-0.613363	0.338087	0.596834	1
Solyc04g076990	SL3.0ch04	62031062	62033062	+	543	1885	538	2166	22.364	19.896	-2.46764	0.0157011	-0.0294781	6.36849	0.938393	1
Solyc04g077100	SL3.0ch04	62140226	62142226	+	2263	6125	1481	4696	26.979	23.976	-3.00298	3.41915e-05	0.155216	0.69118	0.822402	1
Solyc04g077140	SL3.0ch04	62165128	62167128	+	687	4852	667	5715	12.403	10.451	-1.95169	0.000571535	0.412806	2.4365	0.654812	1
Solyc04g077240	SL3.0ch04	62272103	62274103	+	4591	7520	3702	6658	37.908	35.734	-2.1741	0.00052219	4.53881	-3.55997	0.23275	1
Solyc04g077410	SL3.0ch04	62404003	62406003	-	301	5320	209	4940	5.355	4.059	-1.29588	0.00107199	1.7883	-3.87428	1	1
Solyc04g077450	SL3.0ch04	62449179	62451179	+	2839	8214	2529	8127	25.685	23.733	-1.95223	0.000589228	-0.217765	3.2293	0.595383	1
Solyc04g077510	SL3.0ch04	62553769	62555769	+	5011	8228	4047	7812	37.85	34.126	-3.72431	1.14462e-09	0.292736	1.38581	0.734286	1
Solyc04g077610	SL3.0ch04	62652749	62654749	-	1155	8384	992	8052	12.108	10.969	-1.13959	0.00854507	-0.159877	4.21912	0.637001	1
Solyc04g077770	SL3.0ch04	62764849	62766849	-	110	1011	74	1024	9.813	6.74	-3.07314	0.00496732	0	-3.91086	1	1
Solyc04g077910	SL3.0ch04	62862505	62864505	-	1044	7570	762	6077	12.12	11.142	-0.977825	0.0298479	0	-3.75208	1	1
Solyc04g077940	SL3.0ch04	62903706	62905706	-	5936	7303	4635	6938	44.837	40.05	-4.78711	5.91979e-14	0.0520297	4.82471	0.869181	1
Solyc04g077950	SL3.0ch04	62903880	62905880	-	6002	8381	4672	7636	41.73	37.959	-3.77077	5.11434e-10	1.2181	-1.82929	0.317484	1
Solyc04g078020	SL3.0ch04	62968394	62970394	+	5609	10480	4808	9852	34.862	32.797	-2.0656	0.000101444	0	-3.91086	1	1
Solyc04g078200	SL3.0ch04	63088857	63090857	+	3296	8676	2636	8131	27.531	24.482	-3.04869	1.87663e-07	-0.813196	-1.65397	0.300152	1
Solyc04g078195	SL3.0ch04	63088983	63090983	+	3273	8062	2611	7285	28.875	26.384	-2.49077	4.1002e-05	0	-3.91086	1	1
Solyc04g078220	SL3.0ch04	63107174	63109174	-	43	318	35	686	11.911	4.854	-7.05699	3.91992e-05	0	-3.86745	1	1
Solyc04g078230	SL3.0ch04	63107810	63109810	-	43	328	37	727	11.59	4.843	-6.74736	4.69155e-05	0	-3.91086	1	1
Solyc04g078270	SL3.0ch04	63129419	63131419	-	4174	7461	3561	7123	35.875	33.33	-2.5443	5.16997e-05	3.88951	-3.35675	0.169049	1
Solyc04g078390	SL3.0ch04	63215022	63217022	+	3338	8353	2722	7350	28.552	27.025	-1.52646	0.00676226	0.45597	6.10156	0.217375	1
Solyc04g078440	SL3.0ch04	63253839	63255839	+	876	5195	646	5251	14.429	10.955	-3.47453	1.52865e-08	0	-0.468375	1	1
Solyc04g078510	SL3.0ch04	63315271	63317271	+	182	1287	88	1023	12.389	7.921	-4.46859	0.000186691	-0.181237	6.57096	0.503452	1
Solyc04g078560	SL3.0ch04	63348749	63350749	+	1701	6695	1443	6636	20.26	17.861	-2.39853	7.02125e-05	-6.49706	-2.71589	0.00164771	0.153078
Solyc04g078660	SL3.0ch04	63443460	63445460	+	3288	7068	2592	6081	31.75	29.886	-1.86386	0.0032368	0.683302	1.07462	0.368562	1
Solyc04g078680	SL3.0ch04	63461418	63463418	+	528	9646	447	9958	5.19	4.296	-0.893688	0.00171059	0.232946	5.98113	0.506838	1
Solyc04g078710	SL3.0ch04	63480435	63482435	+	928	2822	1062	4492	24.747	19.121	-5.62531	1.6371e-10	4.64828	-3.12831	0.16443	1
Solyc04g078740	SL3.0ch04	63491103	63493103	+	1045	5549	883	5298	15.848	14.286	-1.56203	0.00776226	-1.27304	-2.98244	0.397476	1
Solyc04g078760	SL3.0ch04	63502642	63504642	+	951	6649	594	5111	12.513	10.412	-2.10124	0.000129686	0.0875017	5.09662	0.75694	1
Solyc04g078780	SL3.0ch04	63532402	63534402	+	1486	5660	1038	4376	20.795	19.173	-1.62233	0.0127548	0.0765408	2.83237	0.85454	1
Solyc04g079050	SL3.0ch04	63715545	63717545	+	21	1312	8	1415	1.575	0.562	-1.0132	0.00746096	0	-3.91086	1	1
Solyc04g079043	SL3.0ch04	63729334	63731334	-	96	3546	64	3377	2.636	1.86	-0.77599	0.0156047	0	-3.91086	1	1
Solyc04g079080	SL3.0ch04	63755068	63757068	+	2913	7054	2307	6166	29.226	27.228	-1.99878	0.00164283	-0.877339	-2.56394	0.638481	1
Solyc04g079140	SL3.0ch04	63810201	63812201	-	2447	9807	2122	9625	19.969	18.064	-1.9048	0.000128238	0.539655	3.72176	0.146587	1
Solyc04g079190	SL3.0ch04	63828479	63830479	+	643	4261	508	4846	13.112	9.488	-3.62351	8.00944e-09	1.10341	3.60952	0.0399602	0.922721
Solyc04g079210	SL3.0ch04	63839934	63841934	-	1389	6659	1116	6713	17.259	14.255	-3.00425	2.22869e-07	0	-3.91086	1	1
Solyc04g079230	SL3.0ch04	63840772	63842772	-	1921	8566	1498	7788	18.318	16.132	-2.18611	3.94953e-05	0	-3.91086	1	1
Solyc04g079250	SL3.0ch04	63857002	63859002	-	50	260	21	255	16.129	7.609	-8.52034	0.00133816	1.03948	1.95338	0.395491	1
Solyc04g079360	SL3.0ch04	63972715	63974715	+	7425	6582	6560	6094	53.009	51.841	-1.16789	0.0275917	-0.0808333	4.5691	0.896329	1
Solyc04g079400	SL3.0ch04	64001331	64003331	-	5524	9610	4723	8936	36.501	34.578	-1.92266	0.000447252	0.690083	3.81504	0.37885	1
Solyc04g079505	SL3.0ch04	64041240	64043240	-	2669	5695	2202	5046	31.911	30.381	-1.52977	0.0204024	0	-3.91086	1	1
Solyc04g079520	SL3.0ch04	64045035	64047035	+	648	3860	618	4374	14.374	12.38	-1.99464	0.00264185	0.339417	-1.08791	0.715372	1
Solyc04g079550	SL3.0ch04	64062138	64064138	-	1504	10601	1088	8766	12.425	11.041	-1.38342	0.00101527	-0.11188	6.41408	0.716732	1
Solyc04g079600	SL3.0ch04	64104421	64106421	+	1563	9464	1056	7431	14.174	12.443	-1.73174	0.000300034	-2.1863	-2	0.118795	1
Solyc04g079690	SL3.0ch04	64139949	64141949	+	2478	7440	1920	7356	24.985	20.699	-4.2863	2.8053e-12	-0.0956984	1.26867	0.911227	1
Solyc04g079860	SL3.0ch04	64269606	64271606	-	4483	8457	3926	7936	34.645	33.097	-1.54723	0.0057292	0.865197	2.97473	0.201309	1
Solyc04g079900	SL3.0ch04	64301200	64303200	-	1251	9741	984	8901	11.381	9.954	-1.42653	0.000592706	0.188583	6.49443	0.572679	1
Solyc04g080050	SL3.0ch04	64438185	64440185	-	6554	9463	5341	8246	40.919	39.31	-1.60939	0.00292093	0.0530237	5.09117	0.84065	1
Solyc04g080390	SL3.0ch04	64673237	64675237	-	3814	2709	4085	3223	58.47	55.898	-2.57238	0.00143005	-0.310189	5.52733	0.379663	1
Solyc04g080480	SL3.0ch04	64731269	64733269	+	155	1158	57	1098	11.805	4.935	-6.86996	8.57415e-10	1.77874	-3.58878	1	1
Solyc04g080490	SL3.0ch04	64739066	64741066	-	2680	8592	2298	8009	23.776	22.296	-1.4802	0.00561302	-0.882167	-3.207	0.697707	1
Solyc04g080600	SL3.0ch04	64797379	64799379	+	4206	7958	3944	8360	34.577	32.055	-2.52283	2.35169e-05	-0.0413315	1.94292	0.933734	1
Solyc04g080670	SL3.0ch04	64863341	64865341	+	567	7247	372	6552	7.256	5.373	-1.88359	2.72548e-06	0.00843142	5.07482	0.977158	1
Solyc04g080685	SL3.0ch04	64874453	64876453	-	94	1191	97	2151	7.315	4.315	-3.00023	0.000141028	0.503135	-1.58034	0.809469	1
Solyc04g080690	SL3.0ch04	64875489	64877489	-	94	1191	97	2010	7.315	4.604	-2.71147	0.000777021	0	-3.67476	1	1
Solyc04g080750	SL3.0ch04	64935498	64937498	+	2595	6755	2619	7324	27.754	26.34	-1.41387	0.0140913	-0.711889	-3.33346	0.756566	1
Solyc04g080770	SL3.0ch04	64952519	64954519	-	100	1764	24	926	5.365	2.526	-2.83849	0.00029342	-0.213596	5.04688	0.501374	1
Solyc04g080890	SL3.0ch04	65026371	65028371	-	2732	6535	2543	6954	29.481	26.777	-2.70408	3.12107e-05	-0.976705	-2.71057	0.632867	1
Solyc04g080900	SL3.0ch04	65026789	65028789	+	2886	7637	2718	7699	27.426	26.092	-1.33367	0.0153292	-0.250696	4.49137	0.371377	1
Solyc04g080920	SL3.0ch04	65060455	65062455	-	130	1682	56	1847	7.174	2.943	-4.23167	3.48067e-09	-1.14369	-3.19195	0.789561	1
Solyc04g080930	SL3.0ch04	65068094	65070094	-	2992	3749	2815	4245	44.385	39.873	-4.51258	8.78924e-08	0.250211	4.35091	0.393355	1
Solyc04g080955	SL3.0ch04	65099254	65101254	-	2141	11058	1686	9267	16.221	15.393	-0.827883	0.0374535	-2.72174	-3.83322	0.672066	1
Solyc04g080970	SL3.0ch04	65114982	65116982	-	382	7498	268	6734	4.848	3.827	-1.02024	0.00156767	-0.0328827	-3.59564	1	1
Solyc04g081010	SL3.0ch04	65152055	65154055	+	732	7893	467	6833	8.487	6.397	-2.0897	6.22305e-07	0	-3.91086	1	1
Solyc04g081050	SL3.0ch04	65188246	65190246	-	1016	7018	629	6407	12.646	8.94	-3.70651	5.72142e-13	0	-3.91086	1	1
Solyc04g081060	SL3.0ch04	65193701	65195701	+	4197	4617	3782	4725	47.617	44.458	-3.15992	2.50969e-05	-0.635451	0.584374	0.332077	1
Solyc04g081150	SL3.0ch04	65261499	65263499	-	1905	3691	1782	3868	34.042	31.54	-2.50235	0.00287757	-0.0531516	4.70346	0.890652	1
Solyc04g081220	SL3.0ch04	65300374	65302374	+	271	2626	242	3531	9.355	6.414	-2.94051	8.55198e-06	0.0755114	3.85623	0.84774	1
Solyc04g081235	SL3.0ch04	65318008	65320008	-	2484	8838	2023	8157	21.94	19.872	-2.06729	0.000149595	0.811241	4.83967	0.0704444	1
Solyc04g081270	SL3.0ch04	65383307	65385307	-	3767	9316	3446	9782	28.793	26.051	-2.74229	6.32958e-07	2.19017	-0.254267	0.00762271	0.415624
Solyc04g081290	SL3.0ch04	65415826	65417826	+	762	9357	641	8668	7.53	6.886	-0.644579	0.0398134	0.28888	4.0676	0.58495	1
Solyc04g081320	SL3.0ch04	65442003	65444003	-	967	9950	775	9001	8.858	7.928	-0.930167	0.00917497	-0.951636	4.38084	0.0121007	0.528473
Solyc04g081330	SL3.0ch04	65440821	65442821	-	6678	7539	5845	7043	46.972	45.352	-1.61967	0.0044305	-0.414928	4.7662	0.201844	1
Solyc04g081350	SL3.0ch04	65454975	65456975	-	1567	5235	1717	6466	23.037	20.983	-2.05482	0.00157463	-0.189066	1.8103	0.779616	1
Solyc04g081520	SL3.0ch04	65553812	65555812	+	260	1668	167	1483	13.485	10.121	-3.36427	0.00138717	0	-3.82996	1	1
Solyc04g081530	SL3.0ch04	65560981	65562981	+	2325	8090	1665	7005	22.324	19.204	-3.11942	1.40132e-07	-0.442359	4.17403	0.4981	1
Solyc04g081620	SL3.0ch04	65674326	65676326	+	36	898	14	629	3.854	2.177	-1.6771	0.0368537	0	-3.91086	1	1
Solyc04g081655	SL3.0ch04	65695417	65697417	-	891	4948	519	5408	15.259	8.757	-6.50292	7.07974e-27	1.74136	0.894808	0.00489123	0.314092
Solyc04g081660	SL3.0ch04	65696027	65698027	-	888	5223	515	5338	14.531	8.799	-5.73227	5.32876e-22	1.29445	1.55091	0.0258624	0.76324
Solyc04g081810	SL3.0ch04	65792910	65794910	-	1452	6351	1254	5979	18.608	17.337	-1.27102	0.0215676	0.14459	-2.14328	0.921247	1
Solyc04g081870	SL3.0ch04	65824366	65826366	-	2413	8673	2253	8924	21.766	20.157	-1.60873	0.0019342	-0.949329	0.811304	0.496932	1
Solyc04g082020	SL3.0ch04	65916292	65918292	-	646	4596	438	3635	12.324	10.754	-1.5698	0.010083	-0.215258	6.31363	0.487581	1
Solyc04g082030	SL3.0ch04	65921829	65923829	-	843	8802	621	8304	8.74	6.958	-1.7823	5.86386e-06	-0.239661	3.79904	0.802739	1
Solyc04g082050	SL3.0ch04	65937866	65939866	+	2597	5773	1860	4553	31.027	29.004	-2.02389	0.00444788	0.459841	-2.19416	0.744986	1
Solyc04g082080	SL3.0ch04	65950005	65952005	-	1487	7159	1095	5916	17.199	15.618	-1.58039	0.00464239	0	-3.86883	1	1
Solyc04g082190	SL3.0ch04	66042297	66044297	-	735	4747	583	5210	13.408	10.064	-3.34365	3.84556e-08	-3.65852	-3.51369	0.356669	1
Solyc04g082230	SL3.0ch04	66056464	66058464	+	660	5853	479	5101	10.134	8.584	-1.54935	0.00219642	0	-3.86962	1	1
Solyc04g082250	SL3.0ch04	66064670	66066670	+	53	1082	3	289	4.67	1.027	-3.64221	0.00131749	-0.737006	5.56505	0.0883645	1
Solyc04g082260	SL3.0ch04	66075874	66077874	-	2225	6624	1881	6925	25.144	21.36	-3.78365	3.37508e-09	-0.864792	-1.34627	0.321666	1
Solyc04g082270	SL3.0ch04	66081829	66083829	-	2083	6826	1220	5414	23.381	18.39	-4.99074	8.48026e-14	0.231039	2.86712	0.74096	1
Solyc04g082300	SL3.0ch04	66106888	66108888	-	471	2374	323	2425	16.555	11.754	-4.80136	2.75394e-07	-0.304231	4.66353	0.287354	1
Solyc04g082310	SL3.0ch04	66105672	66107672	+	514	3875	351	3734	11.711	8.592	-3.11868	1.92342e-06	-0.524281	5.0331	0.0815045	1
Solyc04g082420	SL3.0ch04	66171371	66173371	-	11	369	8	620	2.895	1.274	-1.62085	0.0426931	-1.01216	7.50611	0.0149868	0.590529
Solyc04g082450	SL3.0ch04	66181161	66183161	+	6315	6235	6741	7043	50.319	48.905	-1.4142	0.0117401	-0.365548	2.48966	0.4197	1
Solyc04g082460	SL3.0ch04	66181161	66183161	+	6315	6235	6741	7043	50.319	48.905	-1.4142	0.0117401	0.231022	5.3693	0.519542	1
Solyc04g082500	SL3.0ch04	66242941	66244941	-	111	4788	87	5078	2.266	1.684	-0.581354	0.0187274	-0.335392	2.46779	0.77322	1
Solyc04g082565	SL3.0ch04	66290970	66292970	+	52	1817	29	1598	2.782	1.782	-0.999815	0.0268255	-0.0431338	0.786538	0.940414	1
Solyc04g082670	SL3.0ch04	66352310	66354310	+	35	1533	15	1268	2.232	1.169	-1.06301	0.0162616	0.108958	6.64762	0.681117	1
Solyc04g082780	SL3.0ch04	66418817	66420817	-	934	6536	850	7013	12.503	10.81	-1.69322	0.000741729	-0.244196	7.29037	0.35178	1
Solyc04g082830	SL3.0ch04	66448775	66450775	+	6434	8164	5379	7172	44.075	42.857	-1.21739	0.0218014	0.112536	5.79259	0.698017	1
Solyc05g005020	SL3.0ch05	50843	52843	-	772	6682	649	6388	10.357	9.223	-1.13418	0.0114957	0.101174	7.84403	0.723975	1
Solyc05g005080	SL3.0ch05	79285	81285	+	475	6694	346	7624	6.626	4.341	-2.28447	9.45555e-10	-0.41394	8.70174	0.284818	1
Solyc05g005120	SL3.0ch05	116777	118777	-	143	4656	87	4084	2.98	2.086	-0.893957	0.00496979	0.185491	3.41009	0.619743	1
Solyc05g005130	SL3.0ch05	122898	124898	-	24	647	4	477	3.577	0.832	-2.74515	0.00177363	0.7932	3.04589	0.086761	1
Solyc05g005200	SL3.0ch05	177351	179351	-	738	6806	412	5607	9.783	6.845	-2.93762	1.21327e-09	0.396908	6.56684	0.152154	1
Solyc05g005300	SL3.0ch05	242752	244752	-	1743	8567	1387	7818	16.906	15.068	-1.83802	0.000343029	0.193708	-0.480169	0.835052	1
Solyc05g005380	SL3.0ch05	296371	298371	+	425	4084	206	2479	9.426	7.672	-1.75334	0.00607307	-6.75264	-2.84698	0.00196286	0.173352
Solyc05g005390	SL3.0ch05	309387	311387	+	824	4575	2	39	15.262	4.878	-10.384	0.0365946	-4.13146	-3.67219	0.326505	1
Solyc05g005410	SL3.0ch05	324336	326336	-	752	2000	742	2549	27.326	22.546	-4.77924	1.51977e-05	1.78829	-3.87428	1	1
Solyc05g005520	SL3.0ch05	369722	371722	+	126	2915	73	2509	4.143	2.827	-1.31611	0.00502452	0	-3.64468	1	1
Solyc05g005650	SL3.0ch05	489449	491449	-	3036	9678	2451	9244	23.879	20.958	-2.92151	5.16655e-08	1.2013	1.348	0.198566	1
Solyc05g005790	SL3.0ch05	614020	616020	-	156	1670	165	2157	8.543	7.106	-1.43732	0.04164	0.363147	3.65987	0.33488	1
Solyc05g005850	SL3.0ch05	660003	662003	+	1238	6917	872	5910	15.181	12.858	-2.32331	3.82829e-05	0	-3.91086	1	1
Solyc05g005900	SL3.0ch05	692342	694342	-	2213	1429	1330	962	60.763	58.028	-2.73539	0.0194169	-0.0534357	2.24139	0.90685	1
Solyc05g005920	SL3.0ch05	710571	712571	-	765	3501	567	2865	17.932	16.521	-1.41151	0.0493471	-0.506497	4.23237	0.305807	1
Solyc05g005935	SL3.0ch05	709833	711833	+	801	4938	589	4233	13.957	12.215	-1.74229	0.00480225	-4.54015	-3.31496	0.103349	1
Solyc05g006000	SL3.0ch05	740226	742226	+	5932	8562	5162	7971	40.927	39.306	-1.62171	0.00354028	-0.580286	1.28251	0.321168	1
Solyc05g006040	SL3.0ch05	777583	779583	-	1463	6021	1616	7904	19.548	16.975	-2.57358	1.32795e-05	0.215252	0.301085	0.759339	1
Solyc05g006120	SL3.0ch05	837618	839618	-	1953	6327	1850	6942	23.587	21.042	-2.5451	5.35748e-05	0.223795	3.43957	0.72273	1
Solyc05g006130	SL3.0ch05	837020	839020	+	1977	8325	1879	8644	19.19	17.856	-1.33432	0.00749115	0.0310336	3.83989	0.934911	1
Solyc05g006190	SL3.0ch05	864728	866728	+	933	11800	682	10418	7.327	6.144	-1.18327	0.00020829	0	-3.91086	1	1
Solyc05g006370	SL3.0ch05	1020479	1022479	-	1825	5261	1712	5346	25.755	24.256	-1.49885	0.0206188	-1.90783	-3.16839	0.624074	1
Solyc05g006510	SL3.0ch05	1128447	1130447	-	430	7324	237	7200	5.546	3.187	-2.35876	1.82022e-12	0.385764	2.284	0.484577	1
Solyc05g006540	SL3.0ch05	1165565	1167565	-	1749	11360	1332	9445	13.342	12.36	-0.982324	0.0126902	0.646088	-1.60422	0.652239	1
Solyc05g006620	SL3.0ch05	1277598	1279598	-	4720	6329	4763	7209	42.719	39.784	-2.9343	5.45649e-06	0.078631	5.33792	0.806594	1
Solyc05g006750	SL3.0ch05	1379167	1381167	+	120	1215	24	392	8.989	5.769	-3.21953	0.0201947	0	-3.91086	1	1
Solyc05g006850	SL3.0ch05	1478559	1480559	-	1881	7696	1365	6816	19.641	16.685	-2.9558	3.6868e-07	-1.02517	3.66529	0.104817	1
Solyc05g006870	SL3.0ch05	1486311	1488311	-	5428	8537	4808	7979	38.869	37.601	-1.26791	0.0168735	1.12498	5.08637	0.0187599	0.657847
Solyc05g006940	SL3.0ch05	1542163	1544163	-	702	3930	500	3239	15.155	13.373	-1.78288	0.0115634	-0.0250657	4.81456	0.931638	1
Solyc05g006950	SL3.0ch05	1540826	1542826	+	771	5172	624	5973	12.973	9.459	-3.5144	6.10586e-10	0.00726244	6.10277	0.978457	1
Solyc05g007040	SL3.0ch05	1629849	1631849	-	2853	6711	2852	7263	29.831	28.196	-1.63487	0.00653738	-2.86107	0.0133847	0.0378491	0.904612
Solyc05g007050	SL3.0ch05	1635300	1637300	+	2743	10423	2181	9093	20.834	19.345	-1.48857	0.00236697	0.234878	4.64712	0.430275	1
Solyc05g007140	SL3.0ch05	1737686	1739686	-	1652	9300	1388	8365	15.084	14.232	-0.852484	0.040484	0.204403	6.5523	0.651551	1
Solyc05g007230	SL3.0ch05	1870861	1872861	-	4106	7798	3512	8621	34.493	28.946	-5.54676	8.98879e-20	-3.10577	-3.13767	0.209503	1
Solyc05g007240	SL3.0ch05	1894487	1896487	+	1646	10089	1435	10053	14.026	12.491	-1.53512	0.000386774	0.163272	6.651	0.670359	1
Solyc05g007300	SL3.0ch05	1954905	1956905	-	2929	5939	2599	5673	33.029	31.419	-1.60962	0.0129923	-1.45013	-0.960614	0.232054	1
Solyc05g007630	SL3.0ch05	2149502	2151502	-	931	1596	681	1628	36.842	29.493	-7.34882	6.96926e-08	-1.34907	-3.16357	0.477653	1
Solyc05g007820	SL3.0ch05	2254546	2256546	+	4398	6378	3821	6152	40.813	38.313	-2.49947	0.000175669	-0.0567331	4.87414	0.839667	1
Solyc05g007840	SL3.0ch05	2286449	2288449	+	1426	7817	1005	6931	15.428	12.664	-2.76408	2.23862e-07	-0.0461763	2.47726	0.923602	1
Solyc05g007870	SL3.0ch05	2310349	2312349	+	1896	6525	1193	5962	22.515	16.674	-5.84149	2.02782e-19	1.78829	-3.87428	1	1
Solyc05g008000	SL3.0ch05	2427190	2429190	+	2210	10156	1363	9128	17.872	12.992	-4.87949	1.45316e-23	-0.862775	0.48997	0.332347	1
Solyc05g008015	SL3.0ch05	2432054	2434054	+	17	512	0	176	3.214	0	-3.21361	0.00546482	-3.4044	-3.26411	0.381153	1
Solyc05g008170	SL3.0ch05	2569595	2571595	-	934	8705	767	8130	9.69	8.621	-1.06892	0.00687252	1.79846	-3.45068	1	1
Solyc05g008300	SL3.0ch05	2676162	2678162	-	1816	9943	1145	7778	15.443	12.832	-2.61148	1.14183e-07	-1.15246	-0.202653	0.250857	1
Solyc05g008340	SL3.0ch05	2703384	2705384	-	1764	8363	1182	7662	17.419	13.365	-4.05379	2.8336e-14	-0.0941317	3.34401	0.786405	1
Solyc05g008350	SL3.0ch05	2705664	2707664	+	8427	6447	7724	6297	56.656	55.089	-1.56711	0.00419744	-0.487865	5.23441	0.104406	1
Solyc05g008370	SL3.0ch05	2730667	2732667	+	1601	9878	1337	8823	13.947	13.159	-0.787759	0.0438293	0.0269849	5.4172	0.952021	1
Solyc05g008390	SL3.0ch05	2760306	2762306	-	1521	9405	990	8595	13.921	10.329	-3.59228	9.6156e-15	0.0252779	4.58689	0.962415	1
Solyc05g008480	SL3.0ch05	2825857	2827857	+	5983	7970	5298	8030	42.88	39.751	-3.12877	1.68991e-07	-0.0385703	1.5787	0.958863	1
Solyc05g008570	SL3.0ch05	2886711	2888711	+	1908	7404	1681	7069	20.49	19.211	-1.27826	0.0162054	0	-3.91086	1	1
Solyc05g008640	SL3.0ch05	2947983	2949983	+	1927	9008	1599	8478	17.622	15.868	-1.7545	0.000450198	0.912827	2.21643	0.229197	1
Solyc05g008770	SL3.0ch05	3001770	3003770	-	1886	5189	1816	5483	26.657	24.88	-1.77712	0.00828759	0.0742176	4.37218	0.826435	1
Solyc05g008880	SL3.0ch05	3100997	3102997	-	1477	5556	1228	5602	21.001	17.98	-3.02149	6.38387e-06	4.14343	-3.65336	0.318378	1
Solyc05g008920	SL3.0ch05	3131132	3133132	-	2586	10449	1866	8532	19.839	17.946	-1.89314	0.000172263	0.60447	6.57936	0.0978839	1
Solyc05g008940	SL3.0ch05	3147135	3149135	+	73	1625	13	635	4.299	2.006	-2.293	0.00386509	0.20752	1.81295	0.82644	1
Solyc05g008970	SL3.0ch05	3168337	3170337	+	1133	2731	811	2521	29.322	24.34	-4.98221	1.96518e-06	0.0521894	-3.50361	1	1
Solyc05g009070	SL3.0ch05	3214916	3216916	+	3776	6257	3292	5829	37.636	36.093	-1.54327	0.0141596	-0.0702636	5.94443	0.839669	1
Solyc05g009200	SL3.0ch05	3344032	3346032	+	3755	6075	2919	5498	38.199	34.68	-3.51957	8.40667e-07	-5.50874	2.40191	4.51445e-10	3.75518e-07
Solyc05g009270	SL3.0ch05	3416750	3418750	-	1667	6832	1443	6688	19.614	17.747	-1.86718	0.00127211	-4.47784	0.0801147	0.00174682	0.159796
Solyc05g009300	SL3.0ch05	3434838	3436838	+	3364	7560	2779	7216	30.795	27.804	-2.99068	1.95556e-06	-0.281628	5.29369	0.454268	1
Solyc05g009360	SL3.0ch05	3505491	3507491	-	6121	8818	4891	7336	40.973	40.002	-0.971656	0.0485954	0.406941	5.94797	0.222792	1
Solyc05g009520	SL3.0ch05	3720391	3722391	-	4447	8077	3658	7816	35.508	31.881	-3.62705	3.81801e-09	0.804599	5.56445	0.0573757	1
Solyc05g009580	SL3.0ch05	3771319	3773319	+	2315	8648	2093	8863	21.116	19.104	-2.0128	0.000150001	0	-3.91086	1	1
Solyc05g009590	SL3.0ch05	3792933	3794933	+	1308	4684	1101	4353	21.829	20.187	-1.64209	0.0166035	0	-3.91086	1	1
Solyc05g009640	SL3.0ch05	3845239	3847239	+	3042	5076	2503	4683	37.472	34.832	-2.64067	0.000470801	0	-3.86883	1	1
Solyc05g009690	SL3.0ch05	3883637	3885637	+	2719	8628	2067	8149	23.962	20.233	-3.72931	7.02356e-11	0.273492	6.35865	0.316716	1
Solyc05g009800	SL3.0ch05	4023354	4025354	-	4048	8008	3036	6903	33.577	30.546	-3.03031	1.60033e-06	-0.279697	5.31531	0.386433	1
Solyc05g009900	SL3.0ch05	4123320	4125320	+	813	4345	571	3690	15.762	13.401	-2.36131	0.000829604	0	-3.91086	1	1
Solyc05g009920	SL3.0ch05	4144338	4146338	+	5120	9054	4273	8347	36.122	33.859	-2.26352	8.01723e-05	-0.516282	1.72527	0.448261	1
Solyc05g009940	SL3.0ch05	4164089	4166089	-	1529	2812	1249	2528	35.222	33.069	-2.15373	0.020579	-0.232072	4.82939	0.448711	1
Solyc05g009950	SL3.0ch05	4168252	4170252	-	1105	7541	646	6405	12.78	9.162	-3.61866	1.10415e-12	-0.102002	3.24354	0.882337	1
Solyc05g009980	SL3.0ch05	4183351	4185351	-	2106	7353	1763	6610	22.265	21.056	-1.20874	0.0251331	0.334185	8.07554	0.258893	1
Solyc05g009960	SL3.0ch05	4168574	4170574	+	1022	7770	633	7229	11.624	8.051	-3.57282	2.46548e-14	0	-3.91086	1	1
Solyc05g010000	SL3.0ch05	4198133	4200133	+	1762	4834	1257	4689	26.713	21.14	-5.5729	6.10215e-13	3.73906	-1.99606	0.257633	1
Solyc05g010080	SL3.0ch05	4279684	4281684	-	545	3727	171	2115	12.757	7.48	-5.27718	3.83947e-11	-0.766175	0.073901	0.383992	1
Solyc05g010090	SL3.0ch05	4278323	4280323	+	456	2316	77	1139	16.45	6.332	-10.118	2.83597e-19	0	-3.91086	1	1
Solyc05g010140	SL3.0ch05	4317488	4319488	-	3748	8073	2901	6794	31.706	29.923	-1.78364	0.00284095	0.333578	4.52695	0.267322	1
Solyc05g010210	SL3.0ch05	4403065	4405065	+	3519	10901	2332	9390	24.404	19.894	-4.50939	8.38182e-18	0	-3.82867	1	1
Solyc05g010300	SL3.0ch05	4453133	4455133	+	1254	2458	1325	3235	33.782	29.057	-4.72531	3.64872e-06	0.0607247	5.31879	0.838321	1
Solyc05g010370	SL3.0ch05	4515353	4517353	+	26	367	11	396	6.616	2.703	-3.91307	0.00595816	0	-3.91086	1	1
Solyc05g010380	SL3.0ch05	4524123	4526123	-	2253	5340	1714	4453	29.672	27.793	-1.87897	0.00870687	-0.470151	-0.356132	0.621957	1
Solyc05g010390	SL3.0ch05	4524783	4526783	+	3971	6971	3148	6154	36.291	33.842	-2.44917	0.000197408	0	-3.91086	1	1
Solyc05g010450	SL3.0ch05	4696978	4698978	+	2290	8023	1855	7995	22.205	18.832	-3.3725	4.2552e-09	0.00452173	5.38972	0.989813	1
Solyc05g010470	SL3.0ch05	4711829	4713829	-	2131	4739	1893	4682	31.019	28.791	-2.22805	0.0029241	0.195893	4.54778	0.536797	1
Solyc05g010550	SL3.0ch05	4760635	4762635	-	3154	4918	2787	4882	39.073	36.341	-2.73223	0.000296389	5.52809	-2.97336	0.0111276	0.503174
Solyc05g010583	SL3.0ch05	4801489	4803489	+	1714	8294	1603	8737	17.126	15.503	-1.6234	0.00109024	-1.91424	-3.87151	1	1
Solyc05g010630	SL3.0ch05	4858236	4860236	-	299	1920	131	1242	13.475	9.541	-3.93339	0.000268577	0.287621	-3.38648	0.930245	1
Solyc05g010730	SL3.0ch05	4926754	4928754	-	56	2296	28	1865	2.381	1.479	-0.901819	0.0223819	-0.586353	-3.30552	1	1
Solyc05g010750	SL3.0ch05	4948395	4950395	-	1688	3899	1271	3177	30.213	28.575	-1.63835	0.035126	0.532996	-0.657634	0.625227	1
Solyc05g010775	SL3.0ch05	4972951	4974951	+	153	857	60	1006	15.149	5.629	-9.52	1.08158e-12	-0.0795222	1.35782	0.914709	1
Solyc05g011840	SL3.0ch05	5072910	5074910	+	3159	7870	2538	6962	28.643	26.716	-1.92688	0.00135283	0	-3.41497	1	1
Solyc05g056620	SL3.0ch05	5222608	5224608	-	732	8794	594	8300	7.684	6.679	-1.00557	0.00486436	0.156712	4.84273	0.751593	1
Solyc05g012090	SL3.0ch05	5311714	5313714	-	96	3615	42	2188	2.587	1.883	-0.703496	0.0421323	3.68674	-3.56696	0.471186	1
Solyc05g012130	SL3.0ch05	5343849	5345849	-	5892	8976	4418	7547	39.629	36.924	-2.70437	5.37358e-06	0.290423	5.56324	0.312642	1
Solyc05g012176	SL3.0ch05	5401062	5403062	+	2497	5231	1884	4759	32.311	28.361	-3.9504	3.00522e-07	0	-3.91086	1	1
Solyc05g012257	SL3.0ch05	5546613	5548613	-	795	1195	718	1270	39.95	36.117	-3.83305	0.00712798	-0.269406	1.12817	0.629307	1
Solyc05g012780	SL3.0ch05	5942872	5944872	-	2819	10218	2625	9996	21.623	20.799	-0.824404	0.049601	-0.342628	-0.790326	0.700556	1
Solyc05g012870	SL3.0ch05	6016916	6018916	+	3082	9155	2487	8306	25.186	23.043	-2.1432	0.000115381	0.530417	-2.23269	0.765358	1
Solyc05g013060	SL3.0ch05	6158918	6160918	+	852	2301	641	2141	27.022	23.041	-3.98091	0.000309159	0.379908	4.26337	0.322189	1
Solyc05g013200	SL3.0ch05	6271232	6273232	+	45	1179	24	1031	3.676	2.275	-1.40159	0.0311861	-0.152151	1.84578	0.775647	1
Solyc05g013230	SL3.0ch05	6298175	6300175	-	4105	5991	3208	5157	40.66	38.35	-2.3094	0.000907203	0	-3.87342	1	1
Solyc05g013340	SL3.0ch05	6438049	6440049	-	2088	6678	1852	6874	23.819	21.224	-2.59537	3.35729e-05	0.0169982	6.92642	0.944655	1
Solyc05g013345	SL3.0ch05	6446468	6448468	-	386	7709	267	6581	4.768	3.899	-0.869427	0.00562048	-1.25948	-3.66009	0.794899	1
Solyc05g013370	SL3.0ch05	6445493	6447493	+	336	6124	252	6132	5.201	3.947	-1.25387	0.000479256	-0.345177	1.36867	0.626143	1
Solyc05g013610	SL3.0ch05	6910191	6912191	-	1898	2184	1588	2252	46.497	41.354	-5.14265	3.79089e-06	0	-3.91086	1	1
Solyc05g013790	SL3.0ch05	7118520	7120520	-	9258	6319	7710	5922	59.434	56.558	-2.87568	6.58606e-07	0.112976	4.74647	0.677688	1
Solyc05g013795	SL3.0ch05	7118238	7120238	-	9010	5690	7469	5507	61.293	57.56	-3.73241	3.97641e-10	-0.396402	-1.55427	0.750932	1
Solyc05g013810	SL3.0ch05	7118613	7120613	+	8920	6352	7437	6025	58.408	55.244	-3.16315	7.43602e-08	-1.03774	2.10102	0.0997714	1
Solyc05g013990	SL3.0ch05	7490623	7492623	+	5755	6840	4810	6238	45.693	43.537	-2.15544	0.000595941	-0.056337	7.64621	0.844551	1
Solyc05g014030	SL3.0ch05	7536540	7538540	-	1545	7219	1253	6403	17.629	16.366	-1.26269	0.0163108	0.023286	6.89536	0.934341	1
Solyc05g014100	SL3.0ch05	7794377	7796377	+	24	1018	7	730	2.303	0.95	-1.35347	0.0206188	0.451526	2.95429	0.333876	1
Solyc05g014160	SL3.0ch05	7901964	7903964	-	838	7030	193	3930	10.651	4.681	-5.96968	4.61931e-30	-0.669143	2.01074	0.12381	1
Solyc05g014190	SL3.0ch05	7960143	7962143	+	1126	10772	745	8965	9.464	7.673	-1.79127	2.7137e-06	-0.955155	-1.27151	0.333573	1
Solyc05g014260	SL3.0ch05	8042514	8044514	+	3583	5696	3184	5378	38.614	37.188	-1.4265	0.0244335	0.308015	4.25052	0.510041	1
Solyc05g014580	SL3.0ch05	8444290	8446290	+	5172	5918	3254	4950	46.637	39.664	-6.97303	1.76869e-21	-6.14298	-1.64726	6.42335e-05	0.0139048
Solyc05g014633	SL3.0ch05	8621569	8623569	-	86	2623	23	2127	3.175	1.07	-2.10484	4.24578e-07	0.974326	-1.94955	0.458712	1
Solyc05g014652	SL3.0ch05	8647851	8649851	+	3580	7239	2678	5894	33.09	31.241	-1.84868	0.00372744	-0.237936	4.23692	0.504486	1
Solyc05g014900	SL3.0ch05	9115163	9117163	-	825	7028	561	5320	10.506	9.539	-0.966345	0.0301638	0	-3.91086	1	1
Solyc05g014910	SL3.0ch05	9115547	9117547	-	1169	8730	672	6337	11.809	9.588	-2.2216	3.96022e-06	0	-3.91086	1	1
Solyc05g014920	SL3.0ch05	9115851	9117851	-	1068	9097	758	7757	10.507	8.902	-1.6047	0.000177451	0	-3.91086	1	1
Solyc05g014980	SL3.0ch05	9194046	9196046	-	7157	8398	5971	7510	46.011	44.292	-1.71896	0.00202672	0.115691	4.6303	0.797828	1
Solyc05g015070	SL3.0ch05	9781159	9783159	-	858	8879	667	8655	8.812	7.155	-1.65663	2.18582e-05	1.60642	-2.48199	0.41363	1
Solyc05g015410	SL3.0ch05	10461373	10463373	+	1942	11174	1190	8404	14.806	12.404	-2.40276	2.02856e-07	0.263285	3.02548	0.527174	1
Solyc05g015680	SL3.0ch05	11672843	11674843	+	4318	3889	3626	3632	52.614	49.959	-2.65496	0.000655797	0	-3.91086	1	1
Solyc05g015658	SL3.0ch05	11672866	11674866	+	4264	3848	3583	3594	52.564	49.923	-2.64074	0.000724793	0	-3.91086	1	1
Solyc05g015690	SL3.0ch05	11735592	11737592	+	785	2871	492	2450	21.472	16.723	-4.74824	1.10227e-06	0	-3.91086	1	1
Solyc05g015725	SL3.0ch05	11838668	11840668	+	1000	6278	774	5302	13.74	12.739	-1.00139	0.0422489	0.249449	0.262616	0.676062	1
Solyc05g015950	SL3.0ch05	13091537	13093537	-	2639	7976	2301	7703	24.861	23.001	-1.86025	0.00113999	0.340195	4.8953	0.269287	1
Solyc05g016160	SL3.0ch05	14630539	14632539	+	2718	4801	1847	6108	36.148	23.218	-12.9303	4.7133e-68	0	-3.91086	1	1
Solyc05g016230	SL3.0ch05	15167436	15169436	+	5849	7753	5652	8104	43.001	41.088	-1.9135	0.000885376	0.204828	5.38697	0.455893	1
Solyc05g016470	SL3.0ch05	17093791	17095791	+	69	641	92	1153	9.718	7.39	-2.32875	0.034583	0	-3.87229	1	1
Solyc05g016622	SL3.0ch05	17708046	17710046	+	2502	6197	1930	5215	28.762	27.012	-1.75003	0.00800183	0	-3.91086	1	1
Solyc05g017897	SL3.0ch05	19220783	19222783	+	4252	9474	3588	10090	30.978	26.232	-4.7458	1.04921e-17	0	-3.91086	1	1
Solyc05g017970	SL3.0ch05	19342362	19344362	-	343	4265	217	3189	7.444	6.371	-1.07247	0.0301555	-0.377744	-1.50509	0.748498	1
Solyc05g018150	SL3.0ch05	20090378	20092378	+	2037	7600	1488	6810	21.137	17.932	-3.20525	7.64011e-08	0.299853	5.52537	0.29211	1
Solyc05g018235	SL3.0ch05	20276073	20278073	-	45	1377	29	1406	3.165	2.021	-1.14365	0.0287258	0	-3.91086	1	1
Solyc05g018310	SL3.0ch05	20443276	20445276	-	573	3507	357	2539	14.044	12.327	-1.71677	0.0191227	0	-3.83477	1	1
Solyc05g018438	SL3.0ch05	21492762	21494762	+	1539	5947	1478	6273	20.558	19.069	-1.48987	0.0113206	0	-3.91086	1	1
Solyc05g018770	SL3.0ch05	23628732	23630732	-	2882	5362	2505	4990	34.959	33.422	-1.53648	0.0215622	-4.89719	-2.45747	0.0314045	0.825939
Solyc05g018920	SL3.0ch05	24601085	24603085	-	1883	5665	1346	4563	24.947	22.779	-2.16819	0.0021704	0	-3.91086	1	1
Solyc05g020005	SL3.0ch05	25631791	25633791	+	428	5130	288	4179	7.701	6.447	-1.25333	0.00837355	0	-3.91086	1	1
Solyc05g020040	SL3.0ch05	25930821	25932821	+	1397	3860	1005	3109	26.574	24.429	-2.14531	0.00970609	0	-3.91086	1	1
Solyc05g021070	SL3.0ch05	26173200	26175200	+	391	7114	313	6552	5.21	4.559	-0.650501	0.0354644	0	-3.91086	1	1
Solyc05g021090	SL3.0ch05	26350207	26352207	+	1342	7117	1251	7114	15.865	14.955	-0.909589	0.0478676	2.52924	-3.8387	0.667445	1
Solyc05g021163	SL3.0ch05	26617138	26619138	-	80	1376	64	1456	5.495	4.211	-1.28398	0.048102	0	-3.91086	1	1
Solyc05g021480	SL3.0ch05	27704056	27706056	-	83	1948	39	1720	4.087	2.217	-1.86949	0.000757353	0	-3.91086	1	1
Solyc05g021485	SL3.0ch05	27943134	27945134	+	455	4107	232	2632	9.974	8.101	-1.87314	0.00379057	0	-3.91086	1	1
Solyc05g021555	SL3.0ch05	28076701	28078701	-	37	1597	10	815	2.264	1.212	-1.05226	0.0398972	1.06772	-1.93441	0.34682	1
Solyc05g021580	SL3.0ch05	28081497	28083497	-	213	3467	119	3177	5.788	3.61	-2.17761	1.81106e-05	0.503586	-2.86987	0.805586	1
Solyc05g023735	SL3.0ch05	29146390	29148390	+	3222	5085	2409	4344	38.787	35.673	-3.11353	6.46583e-05	-1.25926	-3.35056	0.790551	1
Solyc05g023857	SL3.0ch05	29632129	29634129	+	1173	8734	776	7744	11.84	9.108	-2.73213	2.36033e-09	3.59888	-3.76017	0.304074	1
Solyc05g024130	SL3.0ch05	30477568	30479568	-	800	2425	595	2075	24.806	22.285	-2.52156	0.0127726	0	-3.91086	1	1
Solyc05g024180	SL3.0ch05	30607362	30609362	-	188	2831	88	2201	6.227	3.844	-2.38275	7.71052e-05	0	-3.87342	1	1
Solyc05g024173	SL3.0ch05	30607855	30609855	-	237	3619	115	2607	6.146	4.225	-1.92143	0.000449207	0	-3.91086	1	1
Solyc05g024177	SL3.0ch05	30606637	30608637	+	92	1589	43	1419	5.473	2.941	-2.53176	0.000364878	0	-3.91086	1	1
Solyc05g024200	SL3.0ch05	30762141	30764141	+	145	1666	73	1395	8.007	4.973	-3.03387	0.000360364	-0.702676	-1.58886	0.631022	1
Solyc05g024340	SL3.0ch05	31201028	31203028	+	2018	6014	1473	5302	25.125	21.742	-3.3828	1.34887e-06	0	-3.91086	1	1
Solyc05g024420	SL3.0ch05	31711889	31713889	-	2237	7795	1475	5682	22.299	20.609	-1.68945	0.00453218	0	-3.91086	1	1
Solyc05g025640	SL3.0ch05	35398236	35400236	-	2638	7585	1898	8033	25.805	19.112	-6.69269	3.61851e-29	0	-3.91086	1	1
Solyc05g025670	SL3.0ch05	35769451	35771451	-	6923	8433	4390	6467	45.083	40.435	-4.64861	1.47474e-13	0.804754	-0.180774	0.653626	1
Solyc05g025710	SL3.0ch05	36046011	36048011	+	1208	5787	956	5525	17.269	14.751	-2.51867	5.48715e-05	0	-3.91086	1	1
Solyc05g025790	SL3.0ch05	36743185	36745185	-	3166	8159	2474	6943	27.956	26.272	-1.68421	0.00383736	0.0593712	0.152136	0.932067	1
Solyc05g026157	SL3.0ch05	39946206	39948206	+	1264	6165	537	4663	17.014	10.327	-6.68748	4.73717e-26	0	-3.91086	1	1
Solyc05g026223	SL3.0ch05	40178662	40180662	-	57	1934	56	2665	2.863	2.058	-0.804816	0.0386366	0.533915	1.46748	0.265227	1
Solyc05g026360	SL3.0ch05	40928554	40930554	+	3013	8567	2343	7673	26.019	23.393	-2.62643	7.14803e-06	-0.246482	-0.392339	0.819108	1
Solyc05g026380	SL3.0ch05	41084876	41086876	-	78	3472	20	1718	2.197	1.151	-1.04644	0.00493144	0.179501	2.94364	0.666142	1
Solyc05g026500	SL3.0ch05	41619271	41621271	+	3323	6205	2274	4715	34.876	32.537	-2.33931	0.00110433	0.55403	0.852656	0.33834	1
Solyc05g032710	SL3.0ch05	45954350	45956350	+	2952	8708	1726	6631	25.317	20.653	-4.66398	2.70984e-14	0.310698	-0.122183	0.708106	1
Solyc05g041117	SL3.0ch05	50435497	50437497	+	1471	7180	985	6042	17.004	14.017	-2.98645	2.97786e-07	0	-3.91086	1	1
Solyc05g041140	SL3.0ch05	50435497	50437497	+	1471	7180	985	6042	17.004	14.017	-2.98645	2.97786e-07	3.93328	-3.72245	0.207892	1
Solyc05g041170	SL3.0ch05	50850692	50852692	-	1423	7793	1068	7617	15.441	12.297	-3.14347	1.62426e-09	0	-3.91086	1	1
Solyc05g041220	SL3.0ch05	51393991	51395991	+	1234	6263	1123	7932	16.46	12.402	-4.05793	2.56864e-13	0	-3.91086	1	1
Solyc05g041310	SL3.0ch05	52050322	52052322	+	1434	9742	1134	8436	12.831	11.85	-0.981537	0.0165824	0	-3.91086	1	1
Solyc05g041340	SL3.0ch05	52084373	52086373	+	800	5498	607	5080	12.702	10.673	-2.02898	0.000392963	0	-3.83582	1	1
Solyc05g041390	SL3.0ch05	52250275	52252275	-	838	2186	617	1956	27.712	23.98	-3.73185	0.00102934	0.130873	-0.488113	0.928329	1
Solyc05g041420	SL3.0ch05	52526116	52528116	+	2883	6652	2565	6293	30.236	28.957	-1.2791	0.0283169	0.441083	3.65146	0.237303	1
Solyc05g041570	SL3.0ch05	53156539	53158539	+	3425	9334	2405	8403	26.844	22.252	-4.59176	8.77456e-16	-3.3072	-3.43047	0.0671556	1
Solyc05g041870	SL3.0ch05	54644396	54646396	-	2976	7141	2356	7001	29.416	25.179	-4.23682	5.25664e-11	0	-3.91086	1	1
Solyc05g041995	SL3.0ch05	55303674	55305674	-	313	2283	119	1676	12.057	6.63	-5.42748	2.36033e-09	0	-3.75218	1	1
Solyc05g042050	SL3.0ch05	55395001	55397001	-	414	1175	326	1412	26.054	18.757	-7.29693	5.19726e-07	-0.14834	2.26311	0.7498	1
Solyc05g043320	SL3.0ch05	56778248	56780248	+	1846	5246	1400	4962	26.029	22.006	-4.02367	5.57258e-08	0	-3.91086	1	1
Solyc05g043410	SL3.0ch05	57157436	57159436	-	2454	9823	2204	9711	19.989	18.498	-1.4909	0.00200462	-5.73719	-2.96225	0.0306808	0.815371
Solyc05g043430	SL3.0ch05	57230318	57232318	-	6216	5464	5334	5415	53.219	49.623	-3.59596	8.26439e-08	0.395363	6.67872	0.145518	1
Solyc05g044470	SL3.0ch05	57413993	57415993	-	93	2067	20	1254	4.306	1.57	-2.7357	5.61706e-06	0.22138	2.21937	0.63582	1
Solyc05g045650	SL3.0ch05	58233405	58235405	+	642	4916	470	4513	11.551	9.432	-2.11885	0.000289502	-1.47127	0.67219	0.189348	1
Solyc05g045670	SL3.0ch05	58267731	58269731	+	1853	8366	1339	8067	18.133	14.236	-3.8973	2.63367e-13	-4.7131	1.384	0.00338567	0.246899
Solyc05g046040	SL3.0ch05	59019505	59021505	+	2818	7798	2510	7356	26.545	25.441	-1.10393	0.0350889	0	-3.91086	1	1
Solyc05g046140	SL3.0ch05	59172894	59174894	-	794	1446	644	1845	35.446	25.874	-9.57258	1.77845e-12	0	-3.4854	1	1
Solyc05g046180	SL3.0ch05	59210174	59212174	-	1323	5626	1051	5939	19.039	15.036	-4.00295	5.02742e-10	0	-3.91086	1	1
Solyc05g046200	SL3.0ch05	59223217	59225217	-	1578	2809	932	1830	35.97	33.744	-2.22625	0.0272984	0	-3.70051	1	1
Solyc05g046210	SL3.0ch05	59243635	59245635	-	1897	5139	1370	4321	26.961	24.073	-2.88824	0.000157782	0	-3.91086	1	1
Solyc05g047460	SL3.0ch05	59761857	59763857	-	1755	8446	1641	8724	17.204	15.832	-1.37207	0.00456834	-0.0286908	4.19735	0.950319	1
Solyc05g047490	SL3.0ch05	59811787	59813787	-	2747	7577	2277	6654	26.608	25.495	-1.11244	0.0380291	-4.61781	-3.61882	0.244603	1
Solyc05g047700	SL3.0ch05	60032511	60034511	+	5738	7949	4257	6838	41.923	38.369	-3.55436	1.73749e-08	-1.21936	-0.821953	0.308934	1
Solyc05g048740	SL3.0ch05	60154544	60156544	+	4024	8510	3121	7252	32.105	30.088	-2.01695	0.000673463	0	-3.91086	1	1
Solyc05g050140	SL3.0ch05	60975305	60977305	-	960	3088	753	2752	23.715	21.484	-2.23182	0.01162	0	-3.91086	1	1
Solyc05g050220	SL3.0ch05	61117024	61119024	+	1258	3876	919	3435	24.503	21.107	-3.39628	6.66745e-05	-0.241013	4.4494	0.675371	1
Solyc05g050230	SL3.0ch05	61128350	61130350	+	2066	5736	1486	5215	26.48	22.176	-4.30459	2.45406e-09	-0.0432185	8.14304	0.881157	1
Solyc05g050280	SL3.0ch05	61193020	61195020	+	1925	8729	1275	6896	18.068	15.604	-2.46437	6.88092e-06	-1.80823	3.2921	0.00366172	0.258254
Solyc05g050290	SL3.0ch05	61219636	61221636	+	1239	5764	967	4936	17.692	16.382	-1.31092	0.0251096	-2.58861	-3.28188	0.581412	1
Solyc05g050340	SL3.0ch05	61301459	61303459	+	17	567	2	272	2.911	0.73	-2.18103	0.0229931	0.751006	2.79924	0.181007	1
Solyc05g050408	SL3.0ch05	61422128	61424128	+	4386	7594	2545	6918	36.611	26.894	-9.7168	1.6075e-50	0	-3.91086	1	1
Solyc05g050530	SL3.0ch05	61514907	61516907	+	3730	6201	3262	5711	37.559	36.354	-1.20565	0.0410174	-0.378505	-0.825476	0.644126	1
Solyc05g050540	SL3.0ch05	61524473	61526473	-	963	4076	572	3353	19.111	14.573	-4.53769	1.55548e-08	-2.09598	-0.525422	0.085355	1
Solyc05g050560	SL3.0ch05	61558624	61560624	+	559	7755	257	6257	6.724	3.945	-2.77825	2.02356e-13	-0.0669378	3.10963	0.900595	1
Solyc05g050750	SL3.0ch05	61733506	61735506	-	85	1568	55	1560	5.142	3.406	-1.73659	0.00830663	0	-3.91086	1	1
Solyc05g050800	SL3.0ch05	61839718	61841718	-	2490	7639	2010	6754	24.583	22.935	-1.64815	0.00470182	0.0369946	7.00078	0.952754	1
Solyc05g050920	SL3.0ch05	61989664	61991664	-	2724	6237	2041	5734	30.398	26.251	-4.14759	3.9117e-09	-0.0564147	3.37763	0.873089	1
Solyc05g051010	SL3.0ch05	62063212	62065212	+	823	1425	848	2185	36.61	27.959	-8.6512	4.56554e-11	-0.455237	1.13738	0.475952	1
Solyc05g051060	SL3.0ch05	62098865	62100865	-	3713	10755	3435	10504	25.664	24.643	-1.02045	0.0239983	0.741248	3.37778	0.0508063	1
Solyc05g051080	SL3.0ch05	62135819	62137819	-	796	3965	784	4841	16.719	13.938	-2.7814	6.62977e-05	0	-3.91086	1	1
Solyc05g051210	SL3.0ch05	62320594	62322594	+	3985	8669	3901	9041	31.492	30.142	-1.34985	0.0104823	4.14449	-3.32282	0.367432	1
Solyc05g051270	SL3.0ch05	62393314	62395314	+	129	3197	104	3475	3.879	2.906	-0.972693	0.0141995	1.25282	1.31526	0.0730169	1
Solyc05g051280	SL3.0ch05	62418557	62420557	+	7346	8289	6716	7961	46.984	45.759	-1.22566	0.0167254	-0.303285	3.648	0.381865	1
Solyc05g051530	SL3.0ch05	62744114	62746114	-	237	1006	161	968	19.067	14.26	-4.80637	0.00126786	0.534482	2.10511	0.652507	1
Solyc05g051570	SL3.0ch05	62792592	62794592	-	7009	9330	5648	8655	42.897	39.488	-3.40914	1.93051e-09	0.766614	6.95316	0.0234059	0.72309
Solyc05g051590	SL3.0ch05	62811711	62813711	-	5221	6126	4881	5998	46.012	44.866	-1.14591	0.0404899	0.341152	4.95793	0.260662	1
Solyc05g051770	SL3.0ch05	62998868	63000868	-	2210	6314	1619	5316	25.927	23.345	-2.58145	0.000160029	-0.2763	3.74417	0.431837	1
Solyc05g051996	SL3.0ch05	63197543	63199543	-	4265	9221	3633	8376	31.625	30.252	-1.37308	0.00968245	1.82255	-1.85145	1	1
Solyc05g052110	SL3.0ch05	63282866	63284866	-	369	9914	241	7984	3.588	2.93	-0.658356	0.00704056	0	-3.91086	1	1
Solyc05g052120	SL3.0ch05	63281383	63283383	+	712	9061	474	7951	7.285	5.626	-1.65927	5.31829e-06	0	-3.91086	1	1
Solyc05g052245	SL3.0ch05	63365670	63367670	+	1297	9305	941	8035	12.234	10.484	-1.75003	9.37171e-05	0	-3.91086	1	1
Solyc05g052250	SL3.0ch05	63365670	63367670	+	1297	9305	941	8035	12.234	10.484	-1.75003	9.37171e-05	0	-3.91086	1	1
Solyc05g052560	SL3.0ch05	63629216	63631216	+	1412	5116	1203	4733	21.63	20.266	-1.36373	0.0307823	0.0938853	7.19867	0.83784	1
Solyc05g052590	SL3.0ch05	63650039	63652039	+	1531	9019	1234	7885	14.512	13.532	-0.979663	0.0247918	-0.102796	0.840658	0.873905	1
Solyc05g052715	SL3.0ch05	63772990	63774990	-	4466	9257	3583	8948	32.544	28.593	-3.95082	7.13368e-12	-0.339455	5.10699	0.293038	1
Solyc05g052760	SL3.0ch05	63802570	63804570	+	5163	5569	4377	5004	48.108	46.658	-1.45032	0.0200191	0.180523	7.74414	0.52178	1
Solyc05g053060	SL3.0ch05	64055987	64057987	+	1746	4252	1612	4306	29.11	27.239	-1.87077	0.012381	0	-3.91086	1	1
Solyc05g053150	SL3.0ch05	64134445	64136445	-	1174	4326	676	3512	21.345	16.141	-5.2041	1.37324e-10	-1.91423	-3.87151	1	1
Solyc05g053170	SL3.0ch05	64146493	64148493	+	2707	9279	2723	10012	22.585	21.382	-1.20266	0.0119594	0	-3.91086	1	1
Solyc05g053290	SL3.0ch05	64268871	64270871	+	3790	10592	3177	9442	26.352	25.176	-1.17606	0.01421	0.130375	6.49081	0.689287	1
Solyc05g053330	SL3.0ch05	64295250	64297250	+	3341	9982	2972	10226	25.077	22.519	-2.55837	9.71361e-07	0	-1.40016	1	1
Solyc05g053340	SL3.0ch05	64320718	64322718	-	2517	7344	2189	6753	25.525	24.48	-1.04481	0.046799	-5.97016	-3.14774	0.0215906	0.693925
Solyc05g053460	SL3.0ch05	64376740	64378740	-	1583	7531	1172	6626	17.369	15.029	-2.33939	3.30679e-05	0	-3.91086	1	1
Solyc05g053530	SL3.0ch05	64460957	64462957	-	2178	10107	1774	9427	17.729	15.838	-1.89107	8.45745e-05	0	-3.91086	1	1
Solyc05g053580	SL3.0ch05	64505583	64507583	-	54	2999	27	2313	1.769	1.154	-0.614906	0.0336773	0	-3.87249	1	1
Solyc05g053620	SL3.0ch05	64539893	64541893	+	4246	10744	3994	10561	28.326	27.441	-0.884808	0.0424725	1.12341	7.59644	0.0611917	1
Solyc05g053640	SL3.0ch05	64549710	64551710	+	2338	6199	1868	5652	27.387	24.84	-2.54624	0.000184734	-2.47954	-1.8469	0.00488218	0.314075
Solyc05g053680	SL3.0ch05	64578773	64580773	+	2928	8146	2352	7357	26.44	24.225	-2.21536	0.000180807	4.14082	-3.58364	0.236855	1
Solyc05g053770	SL3.0ch05	64654693	64656693	-	3188	9947	2444	8063	24.271	23.261	-1.01035	0.0342438	0.252118	4.88927	0.390287	1
Solyc05g053860	SL3.0ch05	64742282	64744282	+	6293	7854	5558	7235	44.483	43.446	-1.03729	0.0407239	0.728356	7.00883	0.193589	1
Solyc05g053870	SL3.0ch05	64758672	64760672	-	2350	9284	1833	8522	20.199	17.702	-2.49782	2.37332e-06	-0.300697	3.51177	0.466297	1
Solyc05g053880	SL3.0ch05	64758656	64760656	+	2326	9388	1819	8643	19.857	17.387	-2.46985	2.25618e-06	0.09207	3.30358	0.826447	1
Solyc05g053930	SL3.0ch05	64800340	64802340	+	1966	8074	1604	7665	19.582	17.305	-2.27668	3.75685e-05	-0.471629	4.27729	0.382994	1
Solyc05g054110	SL3.0ch05	64926106	64928106	+	5000	6029	5459	6888	45.335	44.213	-1.12186	0.0403636	-0.871197	0.349414	0.315596	1
Solyc05g054140	SL3.0ch05	64943159	64945159	+	989	5302	774	4729	15.721	14.065	-1.65582	0.00661314	-0.0442568	4.77852	0.891828	1
Solyc05g054420	SL3.0ch05	65207599	65209599	-	811	8145	723	8033	9.055	8.257	-0.798187	0.0295429	0.0631801	3.5912	0.86387	1
Solyc05g054480	SL3.0ch05	65254589	65256589	-	1905	6688	1531	6009	22.169	20.305	-1.86417	0.00242247	-0.463296	1.32693	0.386298	1
Solyc05g054530	SL3.0ch05	65282701	65284701	-	1538	9894	1036	9115	13.453	10.206	-3.24757	3.25496e-13	-1.38691	0.195059	0.0269454	0.7785
Solyc05g054790	SL3.0ch05	65466691	65468691	+	7	107	5	322	6.14	1.529	-4.6113	0.00852366	0	-3.78955	1	1
Solyc05g054850	SL3.0ch05	65504684	65506684	-	1114	7116	1088	7675	13.536	12.416	-1.12001	0.0152925	-0.235828	-1.8205	0.865967	1
Solyc05g054900	SL3.0ch05	65543993	65545993	+	1421	6396	1054	5404	18.178	16.321	-1.85749	0.00216253	0	-3.91086	1	1
Solyc05g055160	SL3.0ch05	65775046	65777046	-	122	3944	72	3139	3	2.242	-0.7582	0.023551	0.546384	11.2699	0.0643715	1
Solyc05g055185	SL3.0ch05	65787018	65789018	-	3027	6843	2414	5997	30.669	28.701	-1.96818	0.00230219	-5.62937	-3.33986	0.0376229	0.903152
Solyc05g055290	SL3.0ch05	65839166	65841166	-	2674	8923	2301	8251	23.058	21.806	-1.25139	0.0134871	0.404559	-1.63616	0.798149	1
Solyc05g055320	SL3.0ch05	65846845	65848845	+	306	2212	259	2453	12.153	9.55	-2.60235	0.0017035	0	-3.87049	1	1
Solyc05g055350	SL3.0ch05	65887023	65889023	-	1530	3753	1096	3124	28.961	25.972	-2.98925	0.000789278	-0.517403	4.8425	0.120544	1
Solyc05g055490	SL3.0ch05	65965470	65967470	+	852	6079	716	5847	12.293	10.91	-1.38295	0.00681193	0	-3.91086	1	1
Solyc05g055560	SL3.0ch05	65997880	65999880	+	428	2881	167	3182	12.934	4.987	-7.94786	8.18233e-30	0	-3.91086	1	1
Solyc05g055620	SL3.0ch05	66040447	66042447	+	1962	9671	1632	9270	16.866	14.97	-1.89608	7.86631e-05	0	-3.91086	1	1
Solyc05g055700	SL3.0ch05	66098208	66100208	-	5007	7367	4115	6353	40.464	39.31	-1.1536	0.0367038	-1.39611	0.520847	0.106538	1
Solyc05g055720	SL3.0ch05	66099266	66101266	+	143	3274	102	2950	4.185	3.342	-0.842887	0.0368624	0	-3.91086	1	1
Solyc05g055730	SL3.0ch05	66108639	66110639	-	1821	9184	1461	7897	16.547	15.612	-0.934714	0.0342438	-1.27567	-1.73928	0.330422	1
Solyc05g055845	SL3.0ch05	66174746	66176746	-	1670	8005	1131	6898	17.261	14.086	-3.17455	9.37582e-09	-1.09893	1.10889	0.186811	1
Solyc05g055860	SL3.0ch05	66184337	66186337	-	1746	4948	1251	4180	26.083	23.034	-3.04863	8.0003e-05	-0.0535233	-2.74941	1	1
Solyc05g055930	SL3.0ch05	66219592	66221592	-	1466	9053	1207	8609	13.937	12.296	-1.64043	0.000381193	0	-3.91086	1	1
Solyc05g055950	SL3.0ch05	66228260	66230260	-	664	3004	609	3175	18.103	16.094	-2.00843	0.0118552	-1.28468	-3.36439	0.487523	1
Solyc05g056000	SL3.0ch05	66243109	66245109	+	1634	6565	1338	5931	19.929	18.407	-1.52233	0.00895536	0.261906	6.819	0.393999	1
Solyc05g056030	SL3.0ch05	66258627	66260627	+	1592	7114	1320	6414	18.286	17.067	-1.21875	0.0211978	0.4869	7.02734	0.1442	1
Solyc05g056130	SL3.0ch05	66380469	66382469	-	456	3556	303	3737	11.366	7.5	-3.8659	3.83871e-09	0.261895	6.29345	0.369171	1
Solyc05g056140	SL3.0ch05	66388128	66390128	-	1589	7298	1341	7335	17.88	15.456	-2.42362	1.45278e-05	-0.4618	2.04407	0.441256	1
Solyc05g056340	SL3.0ch05	66536140	66538140	-	6443	8968	5268	7896	41.808	40.018	-1.78957	0.00134914	0.288446	6.2035	0.291984	1
Solyc05g056350	SL3.0ch05	66536272	66538272	+	6515	9339	5276	7939	41.094	39.924	-1.1694	0.021712	0.218446	6.64971	0.368206	1
Solyc05g056380	SL3.0ch05	66557035	66559035	+	427	8144	254	5600	4.982	4.339	-0.643002	0.036923	1.95643	0.304292	0.174541	1
Solyc05g056420	SL3.0ch05	66575987	66577987	-	2417	9635	2014	8746	20.055	18.717	-1.33729	0.00598764	0	-3.91086	1	1
Solyc05g056490	SL3.0ch05	66615021	66617021	-	960	6589	626	6055	12.717	9.37	-3.34706	3.35073e-10	0.308623	0.119502	0.670479	1
Solyc05g056500	SL3.0ch05	66616304	66618304	+	404	6553	303	7526	5.807	3.87	-1.93687	4.32509e-08	1.19699	0.297943	0.382452	1
Solyc06g005010	SL3.0ch06	7147	9147	+	292	3931	213	3610	6.915	5.572	-1.34298	0.00791024	0	-3.91086	1	1
Solyc06g005020	SL3.0ch06	7147	9147	+	292	3931	213	3610	6.915	5.572	-1.34298	0.00791024	0	-3.91086	1	1
Solyc06g005070	SL3.0ch06	52143	54143	+	8379	8276	6823	7058	50.309	49.154	-1.1557	0.0224564	-1.48725	-3.21569	0.388522	1
Solyc06g005160	SL3.0ch06	179783	181783	+	213	1071	170	1185	16.589	12.546	-4.04266	0.00202891	0.0163705	8.67647	0.959054	1
Solyc06g005270	SL3.0ch06	278552	280552	-	2825	4470	2077	3615	38.725	36.49	-2.23534	0.00534212	0.772554	-0.715136	0.434731	1
Solyc06g005280	SL3.0ch06	287810	289810	+	2043	8765	1599	7566	18.903	17.447	-1.45586	0.00456938	-1.31674	0.860802	0.61178	1
Solyc06g005310	SL3.0ch06	332006	334006	-	672	4595	563	4426	12.759	11.285	-1.47386	0.0119029	-0.981067	-3.40372	0.656269	1
Solyc06g005575	SL3.0ch06	621963	623963	-	2493	9808	1647	8615	20.267	16.05	-4.21714	7.40172e-16	0	-3.91086	1	1
Solyc06g005610	SL3.0ch06	669395	671395	+	1831	10320	1608	10378	15.069	13.416	-1.65307	0.000175569	-0.0205157	-2.38046	1	1
Solyc06g005630	SL3.0ch06	694520	696520	-	58	2550	39	2626	2.224	1.463	-0.760512	0.020326	-0.00898165	1.90338	0.993145	1
Solyc06g005670	SL3.0ch06	732690	734690	+	4886	9631	4538	9475	33.657	32.384	-1.27288	0.011846	0.287384	7.03321	0.308095	1
Solyc06g005755	SL3.0ch06	783853	785853	+	971	5961	833	6026	14.008	12.145	-1.86287	0.000785912	-3.8344	-2.71749	0.0901433	1
Solyc06g005860	SL3.0ch06	877731	879731	-	649	7389	323	5651	8.074	5.407	-2.66739	7.63064e-10	0.235136	3.73644	0.510668	1
Solyc06g005865	SL3.0ch06	876727	878727	+	612	5550	290	4282	9.932	6.343	-3.58888	3.20164e-11	0.025067	4.16462	0.944966	1
Solyc06g005920	SL3.0ch06	904762	906762	+	47	577	34	627	7.532	5.144	-2.38833	0.0397723	0	-3.91086	1	1
Solyc06g005930	SL3.0ch06	914370	916370	+	335	1581	371	2080	17.484	15.137	-2.34766	0.0191936	3.21859	-3.79652	0.527913	1
Solyc06g007170	SL3.0ch06	1228004	1230004	+	3572	10423	2504	8938	25.523	21.884	-3.63912	2.0463e-11	-1.08366	-0.512909	0.159102	1
Solyc06g007330	SL3.0ch06	1355469	1357469	-	482	5407	440	5736	8.185	7.124	-1.0604	0.0156698	-0.00434683	3.72157	0.995608	1
Solyc06g007500	SL3.0ch06	1497354	1499354	-	2536	6793	1835	6364	27.184	22.381	-4.80327	4.26847e-13	3.5967	-3.76036	0.440323	1
Solyc06g007515	SL3.0ch06	1505021	1507021	-	4402	10150	3725	8976	30.25	29.328	-0.921738	0.0447564	0.788907	3.80858	0.0739147	1
Solyc06g007640	SL3.0ch06	1651100	1653100	-	3968	8665	2937	6820	31.41	30.101	-1.30833	0.017932	-0.0915704	6.08267	0.748206	1
Solyc06g007770	SL3.0ch06	1719173	1721173	+	4268	9032	3855	9740	32.09	28.356	-3.73421	4.04854e-11	-0.074093	0.896789	0.920601	1
Solyc06g007910	SL3.0ch06	1792509	1794509	+	3883	10324	3060	8908	27.332	25.568	-1.76342	0.000826116	-0.183667	-1.0877	0.916469	1
Solyc06g008065	SL3.0ch06	1956644	1958644	-	1643	4693	1135	3881	25.931	22.628	-3.3036	3.70941e-05	-6.81992	-2.54261	0.000836978	0.0944385
Solyc06g008130	SL3.0ch06	2008300	2010300	+	23	752	16	1172	2.968	1.347	-1.62094	0.0102007	0.0789118	5.7135	0.789974	1
Solyc06g008250	SL3.0ch06	2129401	2131401	-	2853	9171	2086	8029	23.728	20.623	-3.10471	3.68258e-08	0.053242	5.35213	0.875837	1
Solyc06g008295	SL3.0ch06	2159994	2161994	-	24	846	4	745	2.759	0.534	-2.22458	0.000302257	0.641093	-0.364839	0.674355	1
Solyc06g008320	SL3.0ch06	2200128	2202128	-	4698	10186	4195	9977	31.564	29.601	-1.96347	0.000200295	0.0945401	6.13528	0.72207	1
Solyc06g008550	SL3.0ch06	2443130	2445130	+	4504	6610	4444	7254	40.525	37.989	-2.53606	6.67295e-05	0	-2.82881	1	1
Solyc06g008590	SL3.0ch06	2494978	2496978	+	5600	10455	4514	8944	34.88	33.541	-1.33871	0.00849497	-0.498768	3.16215	0.631739	1
Solyc06g008640	SL3.0ch06	2525876	2527876	-	1293	3556	1181	3730	26.665	24.048	-2.61724	0.00188752	0	-3.91086	1	1
Solyc06g008660	SL3.0ch06	2549128	2551128	-	2137	7040	1737	6468	23.286	21.17	-2.11646	0.000549648	0	-3.91086	1	1
Solyc06g008750	SL3.0ch06	2665703	2667703	+	2743	8677	1855	8301	24.019	18.265	-5.7542	2.91904e-24	2.41363	-2.11402	0.136033	1
Solyc06g008880	SL3.0ch06	2819456	2821456	+	1314	5975	1254	6508	18.027	16.156	-1.87153	0.00147675	-0.130524	6.2009	0.652124	1
Solyc06g008890	SL3.0ch06	2830071	2832071	+	2303	6211	1996	5902	27.05	25.272	-1.77734	0.00554979	-4.93745	-2.11951	0.0367327	0.890786
Solyc06g009060	SL3.0ch06	2988752	2990752	-	3506	7217	2577	7069	32.696	26.716	-5.98034	4.54818e-20	0.103952	5.57356	0.746083	1
Solyc06g009130	SL3.0ch06	3075753	3077753	+	21	919	2	342	2.234	0.581	-1.65265	0.0270655	-0.377675	4.97729	0.273772	1
Solyc06g009250	SL3.0ch06	3209005	3211005	-	1006	6319	769	5831	13.734	11.652	-2.08227	0.000175366	1.78822	-3.87428	1	1
Solyc06g009290	SL3.0ch06	3256358	3258358	-	3925	8305	3581	8270	32.093	30.217	-1.87635	0.00109379	3.852	4.66726	0.00373502	0.261949
Solyc06g009370	SL3.0ch06	3293601	3295601	-	5680	3209	5963	3600	63.899	62.355	-1.54429	0.0154014	0	-3.91086	1	1
Solyc06g009375	SL3.0ch06	3293601	3295601	-	5680	3209	5963	3600	63.899	62.355	-1.54429	0.0154014	0	-3.91086	1	1
Solyc06g009380	SL3.0ch06	3298081	3300081	-	5274	8274	3998	6592	38.928	37.753	-1.17566	0.0305789	-0.157045	7.14557	0.588863	1
Solyc06g009640	SL3.0ch06	3586420	3588420	-	3056	5985	2186	5467	33.802	28.564	-5.23761	6.98172e-13	0.115159	5.92346	0.755197	1
Solyc06g009650	SL3.0ch06	3584921	3586921	+	2863	6562	1994	4968	30.377	28.641	-1.73546	0.00867115	-0.274464	5.81201	0.272505	1
Solyc06g009795	SL3.0ch06	3812777	3814777	-	3212	8179	2918	7924	28.198	26.914	-1.28385	0.0167255	0.265841	1.86183	0.653429	1
[truncated: 2,078 more rows]

## Sheet: PHYA_vs_WT_IG_hypermethylated
Supplementary Table 16. Total differentially methylated promoters (DMPs) in CHH context
ID	chr	from	to	strand	met_WT	unmet_WT	met_PHYA	unmet_PHYA	X.met_WT	X.met_PHYA	X.diff_PHYA.ctrl	FDR_diff_PHYA.WT	logFC_PHYA	logCPM_PHYA	PValue_PHYA	padj_PHYA
Solyc00g005000	SL3.0ch00	14479	16479	+	1184	8858	1170	7044	11.79	14.244	2.45349	8.86255e-07	0	-2.90244	1	1
Solyc00g005040	SL3.0ch00	546343	548343	+	3357	7750	3640	6977	30.224	34.285	4.06045	2.35659e-10	0.479201	1.90935	0.294354	1
Solyc00g005050	SL3.0ch00	575385	577385	-	2233	8002	2494	8117	21.817	23.504	1.68662	0.00225783	0.0432539	6.2588	0.870668	1
Solyc00g005060	SL3.0ch00	724013	726013	-	368	1660	356	1103	18.146	24.4	6.25432	7.35152e-06	0	-3.91086	1	1
Solyc00g005080	SL3.0ch00	791775	793775	-	571	2688	758	2605	17.521	22.539	5.01869	3.46438e-07	0	-3.47704	1	1
Solyc00g005084	SL3.0ch00	807592	809592	+	1168	6183	1057	4391	15.889	19.402	3.51262	2.4346e-07	0	-3.91086	1	1
Solyc00g005092	SL3.0ch00	1125793	1127793	+	720	7498	679	5710	8.761	10.628	1.86639	0.000118349	0.611399	-1.17336	0.607018	1
Solyc00g005096	SL3.0ch00	1732561	1734561	+	1023	8286	1279	7608	10.989	14.392	3.40244	8.66784e-12	0	-3.91086	1	1
Solyc00g005280	SL3.0ch00	2188964	2190964	+	733	1486	1268	1870	33.033	40.408	7.37501	4.12127e-08	0	-3.91086	1	1
Solyc00g005283	SL3.0ch00	2354618	2356618	-	711	4687	862	4447	13.172	16.237	3.06503	6.44642e-06	3.15587	-3.22629	0.109235	1
Solyc00g005440	SL3.0ch00	2365409	2367409	-	928	5231	1189	5794	15.067	17.027	1.95968	0.00144009	0	-3.91086	1	1
Solyc00g005445	SL3.0ch00	2377779	2379779	-	645	2388	617	1987	21.266	23.694	2.42824	0.0150181	0	-3.91086	1	1
Solyc00g005450	SL3.0ch00	2464349	2466349	+	615	6108	825	7265	9.148	10.198	1.05007	0.0162396	0	-3.91086	1	1
Solyc00g005460	SL3.0ch00	2490753	2492753	-	1202	5030	1604	5530	19.288	22.484	3.19633	5.50308e-06	0	-3.91086	1	1
Solyc00g005470	SL3.0ch00	2491481	2493481	-	999	4091	1483	5093	19.627	22.552	2.92498	9.39094e-05	0	-3.91086	1	1
Solyc00g005480	SL3.0ch00	2610590	2612590	+	430	2929	549	2300	12.801	19.27	6.46849	6.7219e-12	0	-3.91086	1	1
Solyc00g005840	SL3.0ch00	3431254	3433254	-	1907	8887	1584	6698	17.667	19.126	1.45859	0.00565578	-0.752869	3.84267	0.0702629	1
Solyc00g005850	SL3.0ch00	3432603	3434603	-	2680	11475	1941	7586	18.933	20.374	1.44044	0.00368956	0	-3.91086	1	1
Solyc00g005890	SL3.0ch00	3566909	3568909	-	2087	6435	1960	4443	24.49	30.611	6.12109	2.66715e-16	-2.5502	-3.83813	0.668902	1
Solyc00g005900	SL3.0ch00	3739496	3741496	-	895	4029	731	2660	18.176	21.557	3.38078	0.000106569	0	-3.91086	1	1
Solyc00g006020	SL3.0ch00	3943107	3945107	+	753	3745	561	2376	16.741	19.101	2.36035	0.00546867	0	-3.91086	1	1
Solyc00g005903	SL3.0ch00	4162096	4164096	+	7580	13854	9466	15437	35.364	38.011	2.64711	4.74189e-09	0	-3.91086	1	1
Solyc00g005907	SL3.0ch00	4172134	4174134	+	9775	17244	11699	17583	36.178	39.953	3.77463	1.09919e-19	0	-3.91086	1	1
Solyc00g006483	SL3.0ch00	4286251	4288251	-	1316	4818	1685	5124	21.454	24.747	3.29247	8.26054e-06	0	-3.91086	1	1
Solyc00g006487	SL3.0ch00	4287311	4289311	-	1344	5937	1779	6370	18.459	21.831	3.3719	2.06605e-07	0	-3.91086	1	1
Solyc00g006490	SL3.0ch00	4295107	4297107	+	5319	9337	5739	8484	36.292	40.35	4.05783	2.48091e-12	0.160908	5.20433	0.553218	1
Solyc00g006510	SL3.0ch00	4370359	4372359	+	105	692	214	876	13.174	19.633	6.45862	0.000168224	0	-3.91086	1	1
Solyc00g006540	SL3.0ch00	4386391	4388391	-	921	5097	1261	5881	15.304	17.656	2.35203	0.000222221	0	-3.91086	1	1
Solyc00g006560	SL3.0ch00	4583304	4585304	-	364	2335	302	1640	13.486	15.551	2.0645	0.0248802	0	-3.91086	1	1
Solyc00g006650	SL3.0ch00	5617777	5619777	-	1198	2793	2168	4082	30.018	34.688	4.67046	8.4138e-07	0	-3.91086	1	1
Solyc00g006655	SL3.0ch00	5619735	5621735	-	733	1578	896	1704	31.718	34.462	2.74367	0.0208559	0	-3.91086	1	1
Solyc00g006660	SL3.0ch00	5628502	5630502	+	459	829	1139	1437	35.637	44.216	8.57919	3.46284e-07	0	-3.91086	1	1
Solyc00g006680	SL3.0ch00	5629656	5631656	+	20301	54647	6270	16377	27.087	27.686	0.599006	0.0360383	0.0840125	-3.31508	1	1
Solyc00g006800	SL3.0ch00	5775062	5777062	+	4762	4938	5784	4617	49.093	55.61	6.51725	8.35452e-20	-0.0164747	5.65501	0.956628	1
Solyc00g006810	SL3.0ch00	5784771	5786771	+	3143	6522	2618	4664	32.519	35.952	3.43226	2.95065e-06	-0.359426	5.40262	0.257491	1
Solyc00g006850	SL3.0ch00	6240615	6242615	-	1312	7232	1245	6395	15.356	16.296	0.940006	0.0481988	0	-3.91086	1	1
Solyc00g006860	SL3.0ch00	6280339	6282339	-	509	4100	565	3702	11.044	13.241	2.19754	0.000995784	0	-3.91086	1	1
Solyc00g006867	SL3.0ch00	6390079	6392079	+	161	8805	233	7236	1.796	3.12	1.32389	4.12127e-08	-0.716583	-0.558252	0.4393	1
Solyc00g006880	SL3.0ch00	6433744	6435744	+	826	4605	905	3488	15.209	20.601	5.39197	6.85895e-12	0	-3.91086	1	1
Solyc00g006890	SL3.0ch00	6446980	6448980	+	1645	5126	1581	4382	24.295	26.513	2.21871	0.00251743	0	-3.91086	1	1
Solyc00g006900	SL3.0ch00	6518309	6520309	+	645	3561	490	2113	15.335	18.824	3.4892	0.000145537	1.26002	-3.66196	0.710031	1
Solyc00g007560	SL3.0ch00	6672572	6674572	+	2918	8009	2762	6721	26.704	29.126	2.42131	9.2401e-05	0	-3.91086	1	1
Solyc00g007555	SL3.0ch00	6673303	6675303	+	1838	6942	1673	5854	20.934	22.227	1.29271	0.0230657	0	-3.91086	1	1
Solyc00g007570	SL3.0ch00	6677501	6679501	-	1541	5385	1655	4883	22.249	25.314	3.06406	2.38643e-05	0	-3.91086	1	1
Solyc00g007600	SL3.0ch00	6693238	6695238	-	2587	6683	2543	5296	27.907	32.44	4.53313	1.83212e-10	-0.882423	-3.21208	0.846173	1
Solyc00g007920	SL3.0ch00	6890411	6892411	-	724	1721	1087	1935	29.611	35.97	6.3581	6.47418e-07	0	-3.91086	1	1
Solyc00g007930	SL3.0ch00	6919608	6921608	-	1381	4302	2399	5560	24.301	30.142	5.84143	1.01681e-13	0	-3.91086	1	1
Solyc00g007950	SL3.0ch00	6926603	6928603	-	288	870	451	1015	24.87	30.764	5.89352	0.000584794	0	-3.91086	1	1
Solyc00g007960	SL3.0ch00	6934602	6936602	-	561	2684	826	2533	17.288	24.591	7.30252	5.68564e-13	0	-3.91086	1	1
Solyc00g007980	SL3.0ch00	6942523	6944523	-	314	870	653	1435	26.52	31.274	4.75368	0.00243916	0	-3.91086	1	1
Solyc00g007990	SL3.0ch00	6954197	6956197	+	240	558	30	20	30.075	60	29.9248	2.28845e-05	0	-3.91086	1	1
Solyc00g008000	SL3.0ch00	6974073	6976073	-	511	2076	886	2530	19.753	25.937	6.18416	2.23621e-08	0	-3.91086	1	1
Solyc00g008010	SL3.0ch00	6985748	6987748	-	371	832	314	557	30.84	36.051	5.21095	0.00753538	0	-3.91086	1	1
Solyc00g008020	SL3.0ch00	6991194	6993194	-	88	231	534	776	27.586	40.763	13.1772	9.91298e-06	0	-3.91086	1	1
Solyc00g008030	SL3.0ch00	6993244	6995244	-	771	3271	878	3064	19.075	22.273	3.19824	0.000304619	0	-3.91086	1	1
Solyc00g008040	SL3.0ch00	7005181	7007181	-	859	3505	1027	3309	19.684	23.685	4.00165	5.1749e-06	0	-3.91086	1	1
Solyc00g008050	SL3.0ch00	7055063	7057063	-	376	1036	254	520	26.629	32.817	6.18764	0.00158152	0	-3.91086	1	1
Solyc00g008055	SL3.0ch00	7069205	7071205	-	221	542	377	483	28.965	43.837	14.8726	7.7366e-10	0	-3.91086	1	1
Solyc00g008060	SL3.0ch00	7070304	7072304	-	579	2673	982	3163	17.804	23.691	5.88677	8.769e-10	0	-3.91086	1	1
Solyc00g008070	SL3.0ch00	7078627	7080627	+	500	1009	752	1267	33.135	37.246	4.11164	0.00638286	0	-3.91086	1	1
Solyc00g008090	SL3.0ch00	7086900	7088900	-	298	1216	394	1256	19.683	23.879	4.19583	0.0026469	0	-3.91086	1	1
Solyc00g008100	SL3.0ch00	7087321	7089321	-	609	2631	703	2718	18.796	20.55	1.75325	0.0349271	0	-3.91086	1	1
Solyc00g008140	SL3.0ch00	7121907	7123907	-	70	223	270	642	23.891	29.605	5.71448	0.0298991	0	-3.91086	1	1
Solyc00g008150	SL3.0ch00	7145063	7147063	-	150	578	501	748	20.604	40.112	19.5077	5.30592e-19	0	-3.91086	1	1
Solyc00g008160	SL3.0ch00	7159867	7161867	-	523	1429	856	1789	26.793	32.363	5.56992	3.64677e-05	0	-3.91086	1	1
Solyc00g008165	SL3.0ch00	7190282	7192282	+	494	1160	535	999	29.867	34.876	5.00915	0.00167168	0	-3.91086	1	1
Solyc00g008260	SL3.0ch00	7277831	7279831	+	2704	4800	3776	5773	36.034	39.543	3.50929	2.50899e-06	0	-3.91086	1	1
Solyc00g008265	SL3.0ch00	7289600	7291600	+	2001	3312	2620	3532	37.662	42.588	4.92544	9.63501e-08	0	-3.91086	1	1
Solyc00g008570	SL3.0ch00	7584122	7586122	-	488795	497461	137533	132431	49.561	50.945	1.38428	3.88551e-36	1.73308	4.32545	0.00294513	0.228012
Solyc00g008580	SL3.0ch00	7582182	7584182	+	222005	462543	63900	124465	32.431	33.923	1.49261	3.09331e-33	1.77258	5.85972	0.0067089	0.37969
Solyc00g008800	SL3.0ch00	7659775	7661775	-	674	2435	1146	3205	21.679	26.339	4.65978	3.37853e-06	0	-3.91086	1	1
Solyc00g008910	SL3.0ch00	7693875	7695875	+	3485	5056	4551	5608	40.803	44.798	3.99453	4.56734e-08	0	-3.91086	1	1
Solyc00g008915	SL3.0ch00	7737914	7739914	-	560	523	357	274	51.708	56.577	4.86864	0.0273123	0	-3.91086	1	1
Solyc00g009020	SL3.0ch00	7793998	7795998	+	1523	5928	1622	5277	20.44	23.511	3.07044	8.22108e-06	-0.124234	7.62401	0.62832	1
Solyc00g009030	SL3.0ch00	7802222	7804222	-	2880	5693	2904	5004	33.594	36.722	3.12847	2.16411e-05	-2.543	-2.21618	0.123703	1
Solyc00g009060	SL3.0ch00	7824190	7826190	+	7977	11387	6385	8672	41.195	42.406	1.21052	0.012435	0.201566	4.70454	0.489456	1
Solyc00g009090	SL3.0ch00	7841622	7843622	-	1970	9750	2035	9320	16.809	17.922	1.11275	0.0134673	1.94531	-3.59636	0.614062	1
Solyc00g009100	SL3.0ch00	7854022	7856022	-	4129	4179	4032	3414	49.699	54.15	4.45079	2.86065e-08	-0.476587	4.21373	0.130773	1
Solyc00g009110	SL3.0ch00	7871111	7873111	+	414	8311	425	6945	4.745	5.767	1.02164	0.0023355	0.220086	3.27196	0.728102	1
Solyc00g009140	SL3.0ch00	7885380	7887380	+	1186	3994	1231	3244	22.896	27.508	4.61263	1.98633e-07	-1.06502	3.36058	0.0187793	0.657884
Solyc00g009141	SL3.0ch00	7897016	7899016	-	6534	5350	7768	5250	54.981	59.671	4.68974	1.63469e-13	-0.0625573	4.45932	0.834802	1
Solyc00g009142	SL3.0ch00	8038913	8040913	+	3203	4400	4475	5245	42.128	46.039	3.91099	2.90958e-07	0	-3.91086	1	1
Solyc00g009143	SL3.0ch00	8048016	8050016	+	2790	5497	3130	5466	33.667	36.412	2.7451	0.000139975	0	-3.91086	1	1
Solyc00g009144	SL3.0ch00	8087349	8089349	+	302	697	241	335	30.23	41.84	11.61	3.28553e-06	0	-3.91086	1	1
Solyc00g009540	SL3.0ch00	8210678	8212678	-	905	5945	857	4427	13.212	16.219	3.00709	3.28792e-06	0	-3.91086	1	1
Solyc00g009148	SL3.0ch00	8298357	8300357	+	2043	4143	3203	4998	33.026	39.056	6.03002	2.03397e-13	0	-3.91086	1	1
Solyc00g009650	SL3.0ch00	8316387	8318387	-	921	1592	1114	1453	36.649	43.397	6.74754	9.28577e-07	0	-3.91086	1	1
Solyc00g009760	SL3.0ch00	8404083	8406083	+	9421	21403	4011	7391	30.564	35.178	4.61419	8.60452e-19	1.41753	4.48675	0.0172519	0.632363
Solyc00g009765	SL3.0ch00	8624891	8626891	+	890	2207	1392	2585	28.737	35.001	6.26377	2.60814e-08	0	-3.91086	1	1
Solyc00g010420	SL3.0ch00	8820426	8822426	+	144	318	65	101	31.169	39.157	7.9878	0.0324794	0	-3.91086	1	1
Solyc06g024330	SL3.0ch00	8833977	8835977	+	3211	6064	4242	6614	34.62	39.075	4.45522	1.07127e-10	0	-3.91086	1	1
Solyc00g010520	SL3.0ch00	8837560	8839560	-	1635	2677	1786	2383	37.917	42.84	4.92257	3.65524e-06	0	-3.91086	1	1
Solyc00g010530	SL3.0ch00	8854847	8856847	-	48131	92325	16306	29029	34.268	35.968	1.70012	6.30411e-11	1.02225	-2.83969	0.517543	1
Solyc00g010750	SL3.0ch00	8954513	8956513	-	817	5568	986	4600	12.796	17.651	4.85566	2.89503e-13	-7.08728	-2.19298	6.96632e-05	0.0145714
Solyc00g010760	SL3.0ch00	8955572	8957572	-	920	4824	986	4375	16.017	18.392	2.37538	0.00063113	0	-3.91086	1	1
Solyc00g010755	SL3.0ch00	8974152	8976152	-	829	5565	1083	6468	12.965	14.342	1.37719	0.0100174	-4.45443	-2.03165	0.00077025	0.0883022
Solyc00g010780	SL3.0ch00	8974782	8976782	-	562	4044	687	4445	12.201	13.387	1.18512	0.03905	0	-3.91086	1	1
Solyc00g010930	SL3.0ch00	9019959	9021959	+	3492	6958	4311	5955	33.416	41.993	8.57672	3.9574e-36	0	-3.91086	1	1
Solyc00g011150	SL3.0ch00	9131088	9133088	-	89518	287576	27020	84447	23.739	24.24	0.50145	0.000381538	1.56956	4.0957	0.00726466	0.402232
Solyc00g011170	SL3.0ch00	9132267	9134267	-	2203	8694	638	1994	20.217	24.24	4.02355	6.34838e-06	1.51801	-2.15704	0.432216	1
Solyc00g011175	SL3.0ch00	9159658	9161658	+	1400	2022	1589	2047	40.912	43.702	2.79012	0.00965552	0	-3.91086	1	1
Solyc03g043580	SL3.0ch00	9309777	9311777	+	289	2461	218	1248	10.509	14.87	4.3613	3.4646e-05	0	-3.91086	1	1
Solyc00g011673	SL3.0ch00	9365433	9367433	+	641	1410	1014	1822	31.253	35.755	4.50154	0.000681441	0	-3.91086	1	1
Solyc00g011870	SL3.0ch00	9381599	9383599	-	1763	9106	1990	8289	16.22	19.36	3.13942	3.16541e-09	0	-3.91086	1	1
Solyc00g011880	SL3.0ch00	9382471	9384471	+	3941	9858	4660	9103	28.56	33.859	5.29886	8.63086e-21	-0.215141	3.70834	0.569852	1
Solyc00g011890	SL3.0ch00	9403098	9405098	-	3763	8792	4455	8330	29.972	34.846	4.8734	3.11464e-16	0.378163	7.3653	0.251953	1
Solyc00g011895	SL3.0ch00	9476079	9478079	+	1666	3773	2232	3912	30.631	36.328	5.69749	1.32698e-10	0	-3.91086	1	1
Solyc00g012430	SL3.0ch00	9551103	9553103	+	101617	221826	28849	59090	31.417	32.806	1.38841	1.13592e-14	2.22073	0.150227	0.0387279	0.91239
Solyc00g012435	SL3.0ch00	9556796	9558796	-	269	573	289	518	31.948	35.812	3.8639	0.0486594	0	-3.91086	1	1
Solyc00g012440	SL3.0ch00	9563323	9565323	+	3197	7455	1529	3263	30.013	31.907	1.8942	0.00972495	1.61738	2.48019	0.0155672	0.600009
Solyc00g012700	SL3.0ch00	9627415	9629415	-	1750	3142	1847	2801	35.773	39.738	3.96483	5.40154e-05	0	-3.91086	1	1
Solyc00g012704	SL3.0ch00	9696804	9698804	-	8520	18872	9746	18303	31.104	34.746	3.64236	2.56761e-19	0	-3.86689	1	1
Solyc00g012706	SL3.0ch00	9705530	9707530	-	3229	6731	3345	5998	32.42	35.802	3.38253	7.05261e-07	0	-3.91086	1	1
Solyc00g012708	SL3.0ch00	9708087	9710087	-	3508	7855	4167	8073	30.872	34.044	3.17199	2.20343e-07	0	-3.91086	1	1
Solyc00g013110	SL3.0ch00	9719089	9721089	-	525	10245	369	6316	4.875	5.52	0.645169	0.0294743	0	-3.91086	1	1
Solyc00g013120	SL3.0ch00	9726388	9728388	-	639	8222	568	4748	7.211	10.685	3.47335	2.61409e-12	-2.56745	-3.0418	0.622599	1
Solyc00g013130	SL3.0ch00	9727452	9729452	-	1226	22082	1019	12962	5.26	7.288	2.02847	7.14198e-15	4.3203	-3.50607	0.210152	1
Solyc00g013133	SL3.0ch00	9727784	9729784	-	1354	24962	1155	15044	5.145	7.13	1.98491	1.87842e-16	1.79071	-3.38388	1	1
Solyc00g013137	SL3.0ch00	9730078	9732078	-	978	8322	1049	5782	10.516	15.356	4.84033	2.82759e-19	1.78517	-3.78951	1	1
Solyc00g013140	SL3.0ch00	9737602	9739602	-	2570	76671	2060	52657	3.243	3.765	0.521556	3.19071e-07	-1.42289	-1.03249	0.143394	1
Solyc00g013150	SL3.0ch00	9736648	9738648	+	3404	117947	3309	81193	2.805	3.916	1.1108	2.09177e-42	1.9493	-2.82133	0.252768	1
Solyc00g013155	SL3.0ch00	9739388	9741388	-	1466	40911	1160	25476	3.459	4.355	0.895585	3.77403e-09	1.65604	-3.15174	0.621835	1
Solyc00g013160	SL3.0ch00	9741809	9743809	-	2401	73261	1946	43450	3.173	4.287	1.1134	9.12011e-23	-0.436295	-1.09184	0.683674	1
Solyc00g013170	SL3.0ch00	9740381	9742381	+	2374	59808	1992	35642	3.818	5.293	1.47526	5.32446e-27	1.38394	-1.39935	0.287353	1
Solyc00g013180	SL3.0ch00	9744467	9746467	-	2025	53079	1701	29958	3.675	5.373	1.69801	9.82137e-31	2.99835	-2.83542	0.040301	0.92581
Solyc00g013183	SL3.0ch00	9797940	9799940	-	1652	3450	2023	3373	32.379	37.491	5.11127	4.57253e-08	0	-3.91086	1	1
Solyc00g013184	SL3.0ch00	9893538	9895538	+	541	1112	651	1086	32.728	37.478	4.75004	0.00237203	0	-3.91086	1	1
Solyc00g013185	SL3.0ch00	9897786	9899786	+	2425	4531	3051	4763	34.862	39.045	4.18331	1.54756e-07	0	-3.91086	1	1
Solyc00g013186	SL3.0ch00	9906680	9908680	+	1920	3635	2359	3717	34.563	38.825	4.26143	1.84041e-06	0	-3.91086	1	1
Solyc00g013188	SL3.0ch00	9963268	9965268	+	1510	4094	2081	4836	26.945	30.085	3.14026	8.59725e-05	0	-3.91086	1	1
Solyc00g014170	SL3.0ch00	9966728	9968728	+	2442	8531	3029	7781	22.255	28.02	5.76573	4.66441e-22	0	-3.91086	1	1
Solyc00g014180	SL3.0ch00	9969604	9971604	+	2631	4716	3074	4632	35.811	39.891	4.08046	2.75052e-07	0	-3.91086	1	1
Solyc00g014190	SL3.0ch00	9985583	9987583	+	937	3334	1604	3817	21.939	29.589	7.64998	4.25271e-17	0	-3.91086	1	1
Solyc00g014290	SL3.0ch00	10010691	10012691	-	2066	4709	2806	5210	30.494	35.005	4.51053	7.5193e-09	0	-3.91086	1	1
Solyc00g014395	SL3.0ch00	10046778	10048778	+	3564	7167	3776	6582	33.212	36.455	3.24273	7.90743e-07	0	-3.91086	1	1
Solyc00g014810	SL3.0ch00	10115885	10117885	-	1187	59965	881	40210	1.941	2.144	0.202957	0.0128939	0	-3.76263	1	1
Solyc00g014830	SL3.0ch00	10125614	10127614	-	1226	63213	819	39129	1.903	2.05	0.147591	0.0451423	-0.568626	-1.51508	0.672211	1
Solyc00g015000	SL3.0ch00	10152463	10154463	-	165	2298	171	1797	6.699	8.689	1.98988	0.00759307	0	-3.91086	1	1
Solyc00g015600	SL3.0ch00	10265463	10267463	-	1346	4305	1121	2894	23.819	27.92	4.10151	4.79168e-06	2.76626	-3.79351	0.650016	1
Solyc00g015735	SL3.0ch00	10338021	10340021	+	925	5554	976	4809	14.277	16.871	2.59432	5.93426e-05	0	-3.91086	1	1
Solyc00g015737	SL3.0ch00	10361092	10363092	-	3287	6579	4043	6369	33.316	38.83	5.51376	8.21081e-16	0	-3.91086	1	1
Solyc00g016790	SL3.0ch00	10444493	10446493	+	4560	7648	5420	6995	37.353	43.657	6.30431	3.31467e-23	0	-3.91086	1	1
Solyc00g017235	SL3.0ch00	10541075	10543075	+	693	929	1411	1342	42.725	51.253	8.52815	5.50433e-08	0	-3.91086	1	1
Solyc00g017540	SL3.0ch00	10558570	10560570	+	365	2446	705	3414	12.985	17.116	4.1311	2.63265e-06	0	-3.91086	1	1
Solyc00g017550	SL3.0ch00	10562435	10564435	+	1813	6233	1674	5183	22.533	24.413	1.88007	0.00398014	0	-3.91086	1	1
Solyc00g017760	SL3.0ch00	10585381	10587381	-	8327	19497	9421	18533	29.927	33.702	3.7744	4.44284e-21	0	-3.91086	1	1
Solyc00g017860	SL3.0ch00	10592794	10594794	+	3584	9385	3687	7382	27.635	33.309	5.67411	6.32805e-21	0	-3.91086	1	1
Solyc00g017933	SL3.0ch00	10619380	10621380	+	537	1004	1112	1483	34.848	42.852	8.00414	3.55355e-07	0	-3.91086	1	1
Solyc00g017937	SL3.0ch00	10634988	10636988	+	4323	9019	3797	5822	32.401	39.474	7.07252	1.78685e-27	0	-3.91086	1	1
Solyc00g018770	SL3.0ch00	10718418	10720418	-	1219	2942	1341	2668	29.296	33.45	4.1539	4.26317e-05	0	-3.91086	1	1
Solyc00g018970	SL3.0ch00	10735340	10737340	+	2797	6602	2606	5228	29.758	33.265	3.50677	7.91427e-07	-1.80898	-3.83197	1	1
Solyc00g019620	SL3.0ch00	10819131	10821131	-	1657	47281	1545	35960	3.386	4.119	0.733534	2.03761e-08	0	-3.91086	1	1
Solyc00g019630	SL3.0ch00	10819968	10821968	-	4363	142929	3080	87975	2.962	3.383	0.420428	1.44224e-08	0	-3.91086	1	1
Solyc00g019730	SL3.0ch00	10829313	10831313	-	3249	97280	2924	74330	3.232	3.785	0.553014	4.49204e-10	0.391827	-2.0331	0.799516	1
Solyc00g019740	SL3.0ch00	10830415	10832415	-	3776	114118	4074	94266	3.203	4.143	0.939893	3.07192e-30	1.16189	-1.30025	0.455904	1
Solyc00g019750	SL3.0ch00	10831749	10833749	-	1250	25712	1323	19612	4.636	6.32	1.68341	1.79515e-15	4.76093	-3.27884	0.1375	1
Solyc00g019980	SL3.0ch00	10847637	10849637	+	1325	81801	899	51510	1.594	1.715	0.121388	0.040418	-0.695275	-2.62185	0.657194	1
Solyc00g020010	SL3.0ch00	10853344	10855344	-	3452	93689	2920	55196	3.554	5.024	1.47084	4.63787e-43	3.15341	-3.39345	0.432078	1
Solyc00g020030	SL3.0ch00	10854853	10856853	-	4141	97756	3472	63986	4.064	5.147	1.083	7.36913e-25	0	-3.91086	1	1
Solyc00g020040	SL3.0ch00	10854013	10856013	+	4197	98151	3543	61005	4.101	5.489	1.38822	1.3383e-37	4.13842	-2.8213	0.189607	1
Solyc00g020540	SL3.0ch00	10903182	10905182	+	2295	12858	2722	11951	15.146	18.551	3.40556	9.06561e-15	0	-3.91086	1	1
Solyc00g020940	SL3.0ch00	10946755	10948755	+	15513	84402	7561	36762	15.526	17.059	1.53267	5.98875e-13	0	-3.91086	1	1
Solyc00g021630	SL3.0ch00	11015632	11017632	-	2060	102721	1675	78602	1.966	2.087	0.12052	0.0328742	1.8535	-1.98897	0.281754	1
Solyc00g021655	SL3.0ch00	11037440	11039440	+	1137	2131	1481	2153	34.792	40.754	5.96207	3.53002e-07	0	-3.91086	1	1
Solyc00g022070	SL3.0ch00	11051610	11053610	+	2747	62099	2056	39721	4.236	4.921	0.685178	1.72476e-07	0	-3.87283	1	1
Solyc00g022920	SL3.0ch00	11136177	11138177	+	959	2012	1329	2043	32.279	39.413	7.13412	4.61115e-09	0	-3.91086	1	1
Solyc00g023050	SL3.0ch00	11146810	11148810	-	8186	23235	7703	20265	26.053	27.542	1.48955	3.43576e-05	0	-3.91086	1	1
Solyc00g023470	SL3.0ch00	11174287	11176287	+	3089	17863	3071	16614	14.743	15.601	0.857489	0.00860475	0	-3.91086	1	1
Solyc00g023600	SL3.0ch00	11189350	11191350	+	1532	79117	1236	57445	1.9	2.106	0.206714	0.00372549	0	-3.91086	1	1
Solyc00g023710	SL3.0ch00	11199671	11201671	-	1279	29788	1347	20307	4.117	6.221	2.10365	1.67099e-26	1.78813	-3.87428	1	1
Solyc00g024040	SL3.0ch00	11224494	11226494	-	3550	2317	4000	1657	60.508	70.709	10.2009	7.91425e-30	0	-3.91086	1	1
Solyc00g024150	SL3.0ch00	11224558	11226558	+	3564	2863	4021	1999	55.454	66.794	11.3405	2.12905e-37	-0.60403	5.42107	0.070017	1
Solyc00g024160	SL3.0ch00	11230391	11232391	-	1355	15645	1492	15318	7.971	8.876	0.905081	0.00176665	-3.61121	-3.38126	0.340695	1
Solyc00g024570	SL3.0ch00	11259566	11261566	+	7594	40970	8001	38951	15.637	17.041	1.40371	5.5308e-09	-3.61683	-3.75958	0.440724	1
Solyc00g025290	SL3.0ch00	11313892	11315892	+	1877	50253	1807	31773	3.601	5.381	1.78057	2.42617e-34	1.69592	-1.17448	0.360159	1
Solyc00g025300	SL3.0ch00	11317263	11319263	-	2864	64966	2566	40522	4.222	5.955	1.73293	5.11575e-37	3.37047	-3.77034	0.530747	1
Solyc00g026160	SL3.0ch00	11372264	11374264	+	7509	22083	6666	14379	25.375	31.675	6.29988	9.11149e-53	-3.34154	-2.69198	0.107973	1
Solyc00g026165	SL3.0ch00	11408797	11410797	+	833	1662	729	1150	33.387	38.797	5.41046	0.000174651	0	-3.87283	1	1
Solyc00g026905	SL3.0ch00	11436456	11438456	-	2021	6888	1732	5097	22.685	25.362	2.6775	7.56692e-05	0	-3.91086	1	1
Solyc00g027640	SL3.0ch00	11467152	11469152	+	2161	7053	1622	4832	23.453	25.132	1.67826	0.00859483	0	-3.91086	1	1
Solyc00g027770	SL3.0ch00	11475330	11477330	+	2525	3470	2764	3111	42.118	47.047	4.92838	7.53867e-08	0.00907482	6.00804	0.973841	1
Solyc00g027970	SL3.0ch00	11488487	11490487	+	923	6925	1091	5853	11.761	15.711	3.95045	5.21895e-12	0	-3.91086	1	1
Solyc00g029090	SL3.0ch00	11565899	11567899	-	3031	6388	2381	3966	32.18	37.514	5.33415	9.02081e-12	0	-3.91086	1	1
Solyc00g029500	SL3.0ch00	11590266	11592266	-	1727	6539	1401	4645	20.893	23.172	2.27953	0.000780291	0	-3.91086	1	1
Solyc00g030000	SL3.0ch00	11624489	11626489	-	3211	8788	4834	10288	26.761	31.967	5.20611	3.78214e-20	0	-3.47695	1	1
Solyc00g030100	SL3.0ch00	11623845	11625845	+	6378	13546	10141	18179	32.012	35.809	3.79697	1.32968e-17	3.84966	-3.62704	0.240531	1
Solyc00g030520	SL3.0ch00	11657277	11659277	-	979	5670	1044	4771	14.724	17.954	3.22955	1.05508e-06	-0.278295	3.52117	0.47747	1
Solyc00g030820	SL3.0ch00	11677156	11679156	-	2822	9076	3203	7905	23.718	28.835	5.1168	3.7405e-18	1.20181	-2.52453	0.384985	1
Solyc00g031050	SL3.0ch00	11688656	11690656	-	1443	3067	1260	2101	31.996	37.489	5.49328	4.09381e-07	0	-3.91086	1	1
Solyc00g031500	SL3.0ch00	11714108	11716108	-	833	2036	632	1258	29.035	33.439	4.40465	0.000851349	0	-3.91086	1	1
Solyc00g031700	SL3.0ch00	11718760	11720760	+	808	3210	940	2845	20.11	24.835	4.72537	5.62194e-07	0	-3.91086	1	1
Solyc00g032030	SL3.0ch00	11739712	11741712	-	1898	6709	1978	6450	22.052	23.469	1.41757	0.0145074	0	-3.91086	1	1
Solyc00g032035	SL3.0ch00	11769366	11771366	-	3556	5675	2882	4352	38.522	39.84	1.31728	0.0409462	0	-3.91086	1	1
Solyc00g032940	SL3.0ch00	11793751	11795751	+	1848	5416	1696	4135	25.441	29.086	3.64539	2.96667e-06	0	-3.91086	1	1
Solyc00g032943	SL3.0ch00	11803226	11805226	+	5515	12039	6613	11612	31.417	36.285	4.86798	1.02427e-21	0	-3.91086	1	1
Solyc00g032947	SL3.0ch00	11830799	11832799	-	35	417	109	562	7.743	16.244	8.50105	1.99638e-05	0	-3.57533	1	1
Solyc00g036320	SL3.0ch00	11989966	11991966	+	9954	31569	9625	28028	23.972	25.562	1.59012	2.38829e-07	0.482571	-2.0378	0.803164	1
Solyc00g036520	SL3.0ch00	11998809	12000809	+	1774	43748	1754	31460	3.897	5.281	1.38389	1.16289e-19	0	-3.91086	1	1
Solyc00g036530	SL3.0ch00	12003685	12005685	-	2383	124981	1846	84583	1.871	2.136	0.264842	1.46907e-05	0	-3.91086	1	1
Solyc00g036960	SL3.0ch00	12027754	12029754	-	926	5181	1179	4466	15.163	20.886	5.72281	1.6055e-15	0	-3.91086	1	1
Solyc00g036962	SL3.0ch00	12097734	12099734	-	2440	4638	2748	4574	34.473	37.531	3.05771	9.85828e-05	0	-3.91086	1	1
Solyc00g036964	SL3.0ch00	12099416	12101416	-	1228	2572	1589	2627	32.316	37.69	5.37396	5.22365e-07	0	-3.87049	1	1
Solyc00g036968	SL3.0ch00	12148869	12150869	+	720	4267	799	4067	14.438	16.42	1.98252	0.00388211	0	-3.91086	1	1
Solyc00g039990	SL3.0ch00	12187866	12189866	-	546	3991	584	2580	12.034	18.458	6.42326	1.61034e-14	0.173119	-1.9307	1	1
Solyc00g040290	SL3.0ch00	12203879	12205879	-	809	3827	1042	3150	17.45	24.857	7.40648	4.2535e-17	0	-3.91086	1	1
Solyc00g040390	SL3.0ch00	12201979	12203979	+	1115	3882	1086	2902	22.313	27.232	4.91831	8.97613e-08	0	-3.91086	1	1
Solyc00g040490	SL3.0ch00	12208736	12210736	+	793	2270	627	1324	25.89	32.137	6.24771	1.79615e-06	0	-3.91086	1	1
Solyc00g041090	SL3.0ch00	12240773	12242773	+	737	3715	441	1773	16.554	19.919	3.36434	0.000545794	0	-3.91086	1	1
Solyc00g042640	SL3.0ch00	12320155	12322155	+	182	720	666	2095	20.177	24.122	3.94431	0.00854424	3.90163	-3.67051	0.341599	1
Solyc00g042840	SL3.0ch00	12334757	12336757	-	1755	5679	1576	4253	23.608	27.037	3.42948	5.88601e-06	0.308229	0.778337	0.6881	1
Solyc00g042850	SL3.0ch00	12333955	12335955	+	1604	4543	1442	3062	26.094	32.016	5.92196	4.69499e-11	-1.91433	-3.87151	1	1
Solyc00g042854	SL3.0ch00	12376717	12378717	+	2651	7895	2801	6454	25.137	30.265	5.12723	2.16147e-15	0	-3.91086	1	1
Solyc00g042858	SL3.0ch00	12406911	12408911	-	1817	10413	2220	10270	14.857	17.774	2.91731	7.79807e-10	0	-3.91086	1	1
Solyc00g044350	SL3.0ch00	12409306	12411306	+	1210	7921	1646	9165	13.252	15.225	1.97367	5.7645e-05	-3.15666	-0.571401	0.0162257	0.613497
Solyc00g044550	SL3.0ch00	12421120	12423120	+	782	20871	664	12997	3.612	4.861	1.24904	1.30707e-08	0	-3.91086	1	1
Solyc00g044755	SL3.0ch00	12523754	12525754	-	3002	5906	2698	4358	33.7	38.237	4.53692	4.00451e-09	0	-3.91086	1	1
Solyc00g046580	SL3.0ch00	12523754	12525754	-	3002	5906	2698	4358	33.7	38.237	4.53692	4.00451e-09	0	-3.91086	1	1
Solyc00g047180	SL3.0ch00	12551302	12553302	-	1006	59585	836	41449	1.66	1.977	0.316748	0.000127022	0	-3.91086	1	1
Solyc00g047190	SL3.0ch00	12550418	12552418	+	1336	72475	1008	47912	1.81	2.061	0.250479	0.00116739	0	-3.91086	1	1
Solyc00g047200	SL3.0ch00	12554728	12556728	-	1418	10126	1690	9947	12.283	14.523	2.23921	5.77167e-07	3.00982	-3.522	0.526619	1
Solyc00g048515	SL3.0ch00	12620943	12622943	+	273	853	267	581	24.245	31.486	7.24073	0.000294067	0	-3.91086	1	1
Solyc00g049210	SL3.0ch00	12653666	12655666	-	552	17649	454	12175	3.033	3.595	0.5621	0.00388838	1.8679	-3.03956	0.437052	1
Solyc00g050430	SL3.0ch00	12707266	12709266	+	3548	6901	3703	6775	33.955	35.341	1.38531	0.0183022	-0.965256	1.55574	0.35827	1
Solyc00g052430	SL3.0ch00	12801179	12803179	+	1877	11367	1374	7655	14.172	15.218	1.04518	0.0155135	1.88316	-3.40262	1	1
Solyc00g052540	SL3.0ch00	12815691	12817691	-	3897	7756	4233	7137	33.442	37.23	3.78752	2.54574e-09	0	-3.91086	1	1
Solyc00g052940	SL3.0ch00	12833740	12835740	-	447	4411	432	3699	9.201	10.458	1.2562	0.0227198	-4.9224	-3.26041	0.165618	1
Solyc00g055950	SL3.0ch00	12971421	12973421	+	531	1585	661	1597	25.095	29.274	4.17918	0.00123736	0	-3.91086	1	1
Solyc00g055960	SL3.0ch00	12972185	12974185	+	95	306	153	257	23.691	37.317	13.6263	2.1668e-05	0	-3.91086	1	1
Solyc00g056180	SL3.0ch00	12985694	12987694	-	363	2614	455	2552	12.193	15.131	2.93788	0.00068271	0	-3.91086	1	1
Solyc00g056680	SL3.0ch00	13006301	13008301	+	2933	9602	3205	8520	23.398	27.335	3.93627	3.43883e-12	-0.548281	1.13422	0.376594	1
Solyc00g057880	SL3.0ch00	13059178	13061178	+	3053	11054	4962	12932	21.642	27.73	6.08823	5.93022e-35	0.168909	2.53643	0.722844	1
Solyc00g059500	SL3.0ch00	13133839	13135839	+	1305	7539	1325	6826	14.756	16.256	1.49991	0.00400353	0.433903	1.15726	0.47525	1
Solyc07g021600	SL3.0ch00	13287270	13289270	+	1201	4256	1326	3883	22.008	25.456	3.44751	2.43475e-05	0	-3.91086	1	1
Solyc00g063110	SL3.0ch00	13302234	13304234	-	2733	20088	2904	18010	11.976	13.885	1.90962	3.51966e-09	0	-3.91086	1	1
Solyc00g065510	SL3.0ch00	13406910	13408910	+	751	2081	1044	2502	26.518	29.442	2.92326	0.0055296	0	-3.91086	1	1
Solyc00g066350	SL3.0ch00	13437927	13439927	+	3088	9582	2353	6406	24.373	26.864	2.49126	3.20075e-05	0	-3.91086	1	1
Solyc00g066155	SL3.0ch00	13437927	13439927	+	3088	9582	2353	6406	24.373	26.864	2.49126	3.20075e-05	0	-3.91086	1	1
Solyc00g068970	SL3.0ch00	13555018	13557018	-	5998	18949	2542	6859	24.043	27.04	2.99671	1.54546e-08	1.52842	4.99672	0.0102499	0.483968
Solyc00g068980	SL3.0ch00	13553285	13555285	+	130414	191143	40065	57810	40.557	40.935	0.377826	0.0178398	1.97808	2.42878	0.00689965	0.38864
Solyc00g068985	SL3.0ch00	13563019	13565019	-	791	8705	1052	9203	8.33	10.258	1.92859	2.92541e-06	0	-3.91086	1	1
Solyc00g069680	SL3.0ch00	13584480	13586480	-	69	797	37	264	7.968	12.292	4.32469	0.0140083	0	-3.8303	1	1
Solyc01g058600	SL3.0ch00	13582322	13584322	+	1302	3780	1634	3245	25.62	33.49	7.87063	2.19985e-17	0	-3.91086	1	1
Solyc00g069880	SL3.0ch00	13590952	13592952	+	1733	37953	2101	26097	4.367	7.451	3.0841	3.429e-63	0	-3.91086	1	1
Solyc00g069883	SL3.0ch00	13619826	13621826	+	347	644	785	1014	35.015	43.635	8.62022	7.87231e-06	0	-3.91086	1	1
Solyc00g069887	SL3.0ch00	13629190	13631190	+	4261	8690	4855	6626	32.901	42.287	9.38632	2.51443e-50	0	-3.91086	1	1
Solyc00g071590	SL3.0ch00	13668690	13670690	-	535	4761	482	3811	10.102	11.228	1.12562	0.0363453	0	-3.91086	1	1
Solyc00g072100	SL3.0ch00	13690746	13692746	-	4633	17829	4311	14854	20.626	22.494	1.86818	3.40534e-06	-0.0788468	4.73822	0.813097	1
Solyc00g072405	SL3.0ch00	13709986	13711986	+	661	1657	714	1537	28.516	31.719	3.20327	0.0098359	0	-3.91086	1	1
Solyc00g072800	SL3.0ch00	13717078	13719078	+	1450	80445	1077	54173	1.771	1.949	0.178761	0.00888426	0	-3.91086	1	1
Solyc00g073900	SL3.0ch00	13761621	13763621	+	1577	10981	1133	7267	12.558	13.488	0.930363	0.0248251	0	-3.91086	1	1
Solyc00g074210	SL3.0ch00	13775616	13777616	+	2817	8640	2146	6207	24.588	25.691	1.10378	0.0368822	0	-3.91086	1	1
Solyc00g074830	SL3.0ch00	13805809	13807809	-	1070	1783	1058	1504	37.504	41.296	3.79148	0.00264182	0	-3.91086	1	1
Solyc00g075030	SL3.0ch00	13808149	13810149	+	1209	5106	1263	4627	19.145	21.443	2.29823	0.00101339	0	-3.91086	1	1
Solyc00g075035	SL3.0ch00	13829621	13831621	-	1306	6396	1411	5298	16.957	21.031	4.07482	6.94405e-10	0	-3.91086	1	1
Solyc06g050455	SL3.0ch00	14042395	14044395	-	2754	6543	3687	6625	29.622	35.754	6.132	2.14747e-19	0	-3.91086	1	1
Solyc00g084650	SL3.0ch00	14212157	14214157	-	819	2927	906	2713	21.863	25.035	3.17122	0.000896672	-0.0683794	-1.40439	1	1
Solyc00g084750	SL3.0ch00	14210498	14212498	-	3056	11560	3275	10839	20.909	23.204	2.29532	2.55229e-06	0	-3.91086	1	1
Solyc00g084760	SL3.0ch00	14211628	14213628	-	1854	5950	1809	5256	23.757	25.605	1.84805	0.00505867	-1.62709	-2.89452	0.419076	1
Solyc00g085070	SL3.0ch00	14224801	14226801	-	1823	8622	1803	6932	17.453	20.641	3.18777	2.56344e-08	0	-3.91086	1	1
Solyc06g024210	SL3.0ch00	14392228	14394228	-	1178	3450	1222	3206	25.454	27.597	2.14335	0.011629	1.59637	5.08388	0.00874085	0.449845
Solyc00g090430	SL3.0ch00	14430232	14432232	+	4446	18414	10354	25725	19.449	28.698	9.24932	2.61827e-141	-3.17311	-3.76012	0.389779	1
Solyc00g090650	SL3.0ch00	14441347	14443347	-	954	2369	958	1988	28.709	32.519	3.80967	0.000760068	0	-3.91086	1	1
Solyc00g090660	SL3.0ch00	14441661	14443661	-	954	2369	1001	2104	28.709	32.238	3.52933	0.00134613	0	-3.91086	1	1
Solyc00g090870	SL3.0ch00	14449470	14451470	-	1759	4474	1667	3767	28.221	30.677	2.45646	0.00226968	0.352889	2.38534	0.386879	1
Solyc00g091170	SL3.0ch00	14456134	14458134	+	1834	4176	2309	4165	30.516	35.666	5.14993	1.3508e-09	-0.373793	3.0487	0.361877	1
Solyc00g092870	SL3.0ch00	14521606	14523606	+	6230	11506	8029	11786	35.126	40.52	5.39351	3.20798e-26	0	-3.91086	1	1
Solyc00g094020	SL3.0ch00	14571243	14573243	-	1437	5787	1561	5091	19.892	23.467	3.5746	3.40258e-07	0	-3.91086	1	1
Solyc00g094540	SL3.0ch00	14584899	14586899	+	2781	77506	2290	49181	3.464	4.449	0.985284	7.82907e-19	1.3738	-3.06611	0.566386	1
Solyc00g094550	SL3.0ch00	14588391	14590391	-	1535	22528	1555	16112	6.379	8.802	2.42263	6.68122e-20	0	-3.91086	1	1
Solyc00g095465	SL3.0ch00	14631843	14633843	+	253	538	319	464	31.985	40.741	8.75591	0.000251355	0	-3.91086	1	1
Solyc00g095860	SL3.0ch00	14638287	14640287	-	220	1464	336	1502	13.064	18.281	5.21661	1.99946e-05	0	-3.87203	1	1
Solyc00g096060	SL3.0ch00	14645519	14647519	-	2316	9636	1801	6544	19.378	21.582	2.20428	9.4075e-05	0	-3.91086	1	1
Solyc00g097960	SL3.0ch00	14713567	14715567	+	898	3947	869	2576	18.535	25.225	6.69039	6.4536e-13	-0.331989	0.756639	0.627113	1
Solyc00g098560	SL3.0ch00	14735327	14737327	+	1772	3317	1709	2624	34.82	39.441	4.6213	3.33059e-06	-0.172049	4.3014	0.602103	1
Solyc00g099160	SL3.0ch00	14760965	14762965	-	456	5572	472	2969	7.565	13.717	6.15224	7.22389e-21	0	-3.91086	1	1
Solyc00g100880	SL3.0ch00	14821531	14823531	+	2751	11343	2711	10507	19.519	20.51	0.990966	0.0204224	1.89688	-3.62658	1	1
Solyc00g102400	SL3.0ch00	14873561	14875561	+	5260	6874	4419	5144	43.349	46.209	2.86008	2.18935e-05	0	-3.91086	1	1
Solyc00g104200	SL3.0ch00	14939878	14941878	+	516	1324	572	1134	28.043	33.529	5.48524	0.000281814	0	-3.91086	1	1
Solyc00g104330	SL3.0ch00	14948892	14950892	-	2137	16383	2443	15825	11.539	13.373	1.83423	1.08696e-07	0	-3.91086	1	1
Solyc00g104337	SL3.0ch00	14954722	14956722	+	64	153	191	327	29.493	36.873	7.3795	0.029633	0	-3.91086	1	1
Solyc00g104940	SL3.0ch00	14969207	14971207	-	3795	12615	4913	12205	23.126	28.701	5.57464	1.99071e-30	0.715306	0.894013	0.307548	1
Solyc00g107050	SL3.0ch00	15044886	15046886	-	15863	65691	16211	60070	19.451	21.252	1.80077	2.05302e-18	0	-3.91086	1	1
Solyc00g107055	SL3.0ch00	15073353	15075353	-	1211	2603	2274	3912	31.751	36.76	5.00898	3.41997e-07	-0.00512072	4.62613	0.988934	1
Solyc00g110370	SL3.0ch00	15166354	15168354	-	843	10286	875	8802	7.575	9.042	1.46725	0.000100313	1.78551	-3.80122	1	1
Solyc00g110870	SL3.0ch00	15184121	15186121	-	2003	7601	818	1729	20.856	32.116	11.2603	2.0223e-30	-0.891235	-0.077562	0.442095	1
Solyc00g111170	SL3.0ch00	15191789	15193789	+	580	2988	678	2936	16.256	18.76	2.50477	0.00331071	0	-3.91086	1	1
Solyc00g111770	SL3.0ch00	15211281	15213281	+	3302	8171	3417	7929	28.781	30.116	1.33573	0.014027	0	-3.91086	1	1
Solyc00g112490	SL3.0ch00	15235729	15237729	+	2667	12659	2111	9285	17.402	18.524	1.12224	0.00978246	0	-3.91086	1	1
Solyc00g112505	SL3.0ch00	15242310	15244310	-	8557	33650	8271	27744	20.274	22.965	2.69154	2.66645e-19	0	-3.91086	1	1
Solyc00g112600	SL3.0ch00	15244053	15246053	-	2352	7568	2461	7207	23.71	25.455	1.74543	0.00279858	0	-3.91086	1	1
Solyc00g112700	SL3.0ch00	15242886	15244886	+	7768	31980	7910	27275	19.543	22.481	2.93805	2.84266e-22	0	-3.91086	1	1
Solyc00g112930	SL3.0ch00	15254586	15256586	-	5700	23290	6682	20638	19.662	24.458	4.79632	1.10583e-41	0.572143	1.28323	0.442571	1
Solyc00g117650	SL3.0ch00	15419851	15421851	-	814	2074	627	1268	28.186	33.087	4.90148	0.000241361	0	-3.91086	1	1
Solyc00g120820	SL3.0ch00	15507960	15509960	+	1990	3260	1749	2567	37.905	40.524	2.61887	0.00505915	0	-3.91086	1	1
Solyc00g121235	SL3.0ch00	15566460	15568460	+	369	1644	383	1178	18.331	24.536	6.2047	6.59119e-06	0	-3.91086	1	1
Solyc00g123030	SL3.0ch00	15583143	15585143	+	1040	9627	998	7304	9.75	12.021	2.2715	5.92215e-07	0	-3.91086	1	1
Solyc00g123240	SL3.0ch00	15592269	15594269	+	527	2986	770	3563	15.001	17.771	2.76917	0.000694362	0	-3.91086	1	1
Solyc00g126000	SL3.0ch00	15683423	15685423	+	2334	79469	1659	52185	2.853	3.081	0.227927	0.00848923	-0.149921	-2.24814	1	1
Solyc00g126010	SL3.0ch00	15683740	15685740	+	1935	74319	1425	48899	2.538	2.832	0.294079	0.000988235	-0.322317	-1.72909	0.865637	1
Solyc00g126430	SL3.0ch00	15691542	15693542	+	1483	4301	1677	3884	25.64	30.156	4.51675	8.81947e-08	0	-3.91086	1	1
Solyc00g128870	SL3.0ch00	15771534	15773534	+	782	1420	1012	1534	35.513	39.749	4.23546	0.0016468	0.257484	3.49961	0.500331	1
Solyc00g130810	SL3.0ch00	15839293	15841293	-	368	1072	505	959	25.556	34.495	8.93898	1.79189e-07	0	-3.91086	1	1
Solyc00g131610	SL3.0ch00	15863687	15865687	-	2170	7976	2423	7120	21.388	25.39	4.0026	5.23706e-11	0	-3.91086	1	1
Solyc00g133720	SL3.0ch00	15934609	15936609	-	901	2731	1129	2562	24.807	30.588	5.78065	3.99237e-08	0	-3.91086	1	1
Solyc00g134620	SL3.0ch00	15963948	15965948	-	1684	7144	1672	6387	19.076	20.747	1.67132	0.0039265	-2.96613	-3.5284	0.344241	1
Solyc00g136260	SL3.0ch00	16015399	16017399	-	329	3825	395	3657	7.92	9.748	1.8282	0.00234625	0.0786932	4.73268	0.869079	1
Solyc00g136560	SL3.0ch00	16023309	16025309	-	3946	10572	4241	8372	27.18	33.624	6.44399	8.35162e-30	0.219121	1.67393	0.766404	1
Solyc00g136565	SL3.0ch00	16068947	16070947	+	1018	2792	726	1493	26.719	32.717	5.99828	8.31364e-07	5.32175	-3.44203	0.155422	1
Solyc00g139760	SL3.0ch00	16128726	16130726	-	4440	5800	4966	5076	43.359	49.452	6.09293	1.05672e-17	0	-3.91086	1	1
Solyc00g141360	SL3.0ch00	16179624	16181624	-	113	398	1156	3374	22.114	25.519	3.40526	0.044171	0	-3.91086	1	1
Solyc00g141560	SL3.0ch00	16184920	16186920	-	2169	5801	2838	5833	27.215	32.73	5.51523	1.98463e-14	0	-3.91086	1	1
Solyc00g142170	SL3.0ch00	16203631	16205631	-	1892	64550	1724	42384	2.848	3.909	1.06099	2.69514e-21	0	-3.69284	1	1
Solyc00g142160	SL3.0ch00	16203089	16205089	-	2490	85572	2148	56773	2.828	3.646	0.818006	8.3159e-18	0	-3.86883	1	1
Solyc00g143770	SL3.0ch00	16255415	16257415	-	641	2974	855	3432	17.732	19.944	2.21234	0.00717602	-0.0517825	1.54555	0.936301	1
Solyc00g144470	SL3.0ch00	16272991	16274991	+	2580	6041	2669	4724	29.927	36.102	6.1748	3.24824e-16	0	-3.76263	1	1
Solyc00g143777	SL3.0ch00	16273654	16275654	+	3485	7217	3960	5618	32.564	41.345	8.78074	3.4139e-37	0	-3.91086	1	1
Solyc00g145170	SL3.0ch00	16295400	16297400	+	1370	6805	1444	5654	16.758	20.344	3.58535	1.6481e-08	-3.23325	-3.72617	0.466929	1
Solyc00g147570	SL3.0ch00	16374656	16376656	-	1352	2846	1408	2574	32.206	35.359	3.1533	0.0016763	-2.44316	-3.65539	0.470804	1
Solyc00g147577	SL3.0ch00	16449035	16451035	-	1162	2231	1177	1658	34.247	41.517	7.26978	4.90328e-09	0	-3.91086	1	1
Solyc00g153680	SL3.0ch00	16562300	16564300	-	2435	8572	2248	6645	22.122	25.278	3.15602	1.95532e-07	1.26983	-0.661091	0.231835	1
Solyc00g153980	SL3.0ch00	16568348	16570348	+	1480	47435	1204	32009	3.026	3.625	0.59943	2.15584e-06	0	-3.86959	1	1
Solyc00g154480	SL3.0ch00	16585756	16587756	+	4227	4274	3990	3633	49.724	52.342	2.61804	0.000603236	0	-3.91086	1	1
Solyc00g154980	SL3.0ch00	16597742	16599742	+	1558	4549	1853	4266	25.512	30.283	4.77102	5.41271e-09	0	-3.91086	1	1
Solyc00g156980	SL3.0ch00	16661243	16663243	-	2994	8410	3145	7801	26.254	28.732	2.47801	2.78211e-05	-0.390434	-2.50176	0.843472	1
Solyc00g157080	SL3.0ch00	16661033	16663033	+	2922	9649	3015	8889	23.244	25.328	2.08365	0.000110557	0	-3.91086	1	1
Solyc00g157083	SL3.0ch00	16661383	16663383	+	2882	8301	2968	7637	25.771	27.987	2.21554	0.000163011	0	-3.91086	1	1
Solyc00g160780	SL3.0ch00	16772423	16774423	+	2040	2902	2083	2462	41.279	45.831	4.55175	7.09142e-06	-1.42829	-1.51988	0.315238	1
Solyc00g160785	SL3.0ch00	16794746	16796746	-	812	2149	732	1575	27.423	31.73	4.30635	0.000470539	0	-3.91086	1	1
Solyc09g056230	SL3.0ch00	16856029	16858029	+	2514	3643	3075	3311	40.832	48.152	7.32063	4.07537e-16	0	-3.91086	1	1
Solyc00g164580	SL3.0ch00	16884713	16886713	+	3997	10205	3992	8780	28.144	31.256	3.11195	2.72326e-08	1.81213	-3.69127	1	1
Solyc00g164680	SL3.0ch00	16887526	16889526	+	2412	91831	2135	63623	2.559	3.247	0.687412	1.55373e-15	0.234465	3.66247	0.598658	1
Solyc00g165195	SL3.0ch00	16940390	16942390	+	1033	2789	1036	2312	27.028	30.944	3.91611	0.000198322	0	-3.91086	1	1
Solyc00g167290	SL3.0ch00	16963803	16965803	+	879	1929	915	1658	31.303	35.562	4.25818	0.000630918	0	-3.91086	1	1
Solyc00g170510	SL3.0ch00	17061068	17063068	-	2296	2478	2549	1790	48.094	58.746	10.6524	1.18624e-23	0	-3.91086	1	1
Solyc00g171810	SL3.0ch00	17098009	17100009	-	657	31476	825	23464	2.045	3.397	1.35197	2.71303e-22	0.937362	1.65316	0.119718	1
Solyc00g172410	SL3.0ch00	17116659	17118659	-	4258	7301	4086	6322	36.837	39.258	2.42117	0.000160969	0	-3.91086	1	1
Solyc00g173430	SL3.0ch00	17139051	17141051	+	715	3306	1089	4395	17.782	19.858	2.07612	0.00609009	1.90137	-3.87171	1	1
Solyc00g174330	SL3.0ch00	17167463	17169463	-	2012	10037	2247	9221	16.698	19.594	2.89517	1.01199e-08	2.16107	2.19195	0.0966035	1
Solyc00g174340	SL3.0ch00	17168117	17170117	-	231	4558	263	4210	4.824	5.88	1.05617	0.0135557	3.2206	9.35151	0.0148847	0.589704
Solyc00g179240	SL3.0ch00	17306300	17308300	-	9380	34239	9760	30853	21.504	24.032	2.52732	6.99196e-18	-1.43489	-3.76124	0.731927	1
Solyc00g180840	SL3.0ch00	17349035	17351035	+	743	1672	807	1628	30.766	33.142	2.37564	0.0372136	-8.19983	-1.86649	0.000356582	0.0488667
Solyc00g181240	SL3.0ch00	17363185	17365185	-	2120	82431	1656	56334	2.507	2.856	0.348302	4.92091e-05	0	-3.6317	1	1
Solyc00g183050	SL3.0ch00	17411773	17413773	+	477	2303	545	2259	17.158	19.437	2.27825	0.0149422	0.47964	-2.04406	0.745094	1
Solyc00g183055	SL3.0ch00	17425033	17427033	+	970	1756	719	1110	35.583	39.311	3.72783	0.00620502	0	-3.91086	1	1
Solyc00g183555	SL3.0ch00	17426037	17428037	+	742	1298	704	1075	36.373	39.573	3.20024	0.0221272	0	-3.91086	1	1
Solyc00g185750	SL3.0ch00	17490434	17492434	-	858	4591	1086	4552	15.746	19.262	3.51614	1.17379e-06	0	-3.91086	1	1
Solyc00g185850	SL3.0ch00	17489695	17491695	+	211	1983	305	1940	9.617	13.586	3.96861	2.91408e-05	0	-3.91086	1	1
Solyc00g187050	SL3.0ch00	17527227	17529227	-	345	1168	305	697	22.802	30.439	7.63674	1.83017e-05	0	-3.91086	1	1
Solyc00g188850	SL3.0ch00	17577134	17579134	-	3093	6718	2784	5053	31.526	35.524	3.99796	2.56443e-08	0	-3.91086	1	1
Solyc00g188853	SL3.0ch00	17577252	17579252	-	3110	6391	2805	4857	32.733	36.609	3.87584	1.23415e-07	0	-3.91086	1	1
Solyc00g195350	SL3.0ch00	17751071	17753071	+	612	3539	911	3068	14.743	22.895	8.15176	1.82086e-20	0	-3.91086	1	1
Solyc00g188855	SL3.0ch00	17751239	17753239	+	709	4497	1032	3924	13.619	20.823	7.20434	2.19529e-21	0	-3.91086	1	1
Solyc00g195360	SL3.0ch00	17751902	17753902	+	1511	6180	1904	5434	19.646	25.947	6.30078	1.22713e-19	0	-3.8258	1	1
Solyc00g198360	SL3.0ch00	17836080	17838080	-	2097	7231	2295	6649	22.481	25.66	3.17896	5.02884e-07	0	-3.91086	1	1
Solyc00g201060	SL3.0ch00	17906065	17908065	+	2409	11770	2541	10596	16.99	19.342	2.3524	4.81793e-07	0	-3.91086	1	1
Solyc00g201160	SL3.0ch00	17912082	17914082	-	1298	7720	1174	6324	14.393	15.658	1.26407	0.0125018	0.697487	2.6089	0.192111	1
Solyc00g201165	SL3.0ch00	17919894	17921894	-	806	2353	650	1510	25.514	30.093	4.57819	0.000176681	0	-3.91086	1	1
Solyc00g202560	SL3.0ch00	17945080	17947080	+	2410	7376	2400	6663	24.627	26.481	1.85428	0.00216551	0	-3.91086	1	1
Solyc00g203660	SL3.0ch00	17977333	17979333	-	722	7720	741	6259	8.552	10.586	2.03324	1.52904e-05	0.721862	-0.371376	0.505969	1
Solyc00g209460	SL3.0ch00	18132723	18134723	-	2111	6846	2429	6899	23.568	26.04	2.47172	8.6787e-05	-1.00958	-0.319692	0.171191	1
Solyc00g212260	SL3.0ch00	18204316	18206316	+	2143	5306	2421	4989	28.769	32.672	3.9031	2.7897e-07	-3.76016	-3.73318	0.223839	1
Solyc00g212265	SL3.0ch00	18208150	18210150	+	1008	5151	1194	4189	16.366	22.181	5.81465	5.58048e-15	0	-3.91086	1	1
Solyc00g213960	SL3.0ch00	18249762	18251762	-	433	738	344	391	36.977	46.803	9.82578	2.00083e-05	0	-3.91086	1	1
Solyc00g217560	SL3.0ch00	18339728	18341728	+	795	4605	1326	6442	14.722	17.07	2.34781	0.000229002	0	-3.91086	1	1
Solyc00g217960	SL3.0ch00	18350138	18352138	+	1068	3102	861	1817	25.612	32.151	6.53935	6.45979e-09	-0.410296	4.61513	0.285253	1
Solyc00g218560	SL3.0ch00	18367559	18369559	-	11074	25232	13590	26101	30.502	34.24	3.73765	2.50201e-27	0	-3.82402	1	1
Solyc00g222060	SL3.0ch00	18456008	18458008	+	2846	6539	3737	7182	30.325	34.225	3.89976	4.28908e-09	0	-3.91086	1	1
Solyc00g222063	SL3.0ch00	18461232	18463232	+	2547	6747	2790	6253	27.405	30.853	3.44782	2.8248e-07	0	-3.91086	1	1
Solyc00g227960	SL3.0ch00	18606154	18608154	+	7	301	237	770	2.273	23.535	21.2625	1.74917e-21	0	-3.91086	1	1
Solyc00g230060	SL3.0ch00	18657729	18659729	+	1055	4574	1450	5037	18.742	22.352	3.61017	9.99107e-07	-0.907075	-3.59771	0.783536	1
Solyc00g230070	SL3.0ch00	18661095	18663095	-	3804	118525	3142	75388	3.11	4.001	0.891372	1.92771e-25	-3.96417	-2.95418	0.172683	1
Solyc00g230080	SL3.0ch00	18661507	18663507	-	2094	37649	1652	25081	5.269	6.18	0.910776	6.88266e-07	0.517107	-2.12624	0.75581	1
Solyc00g231680	SL3.0ch00	18701854	18703854	-	1987	16247	1947	11795	10.897	14.168	3.27102	4.96211e-18	-4.16386	-3.62281	0.295476	1
Solyc00g237680	SL3.0ch00	18847433	18849433	+	963	2436	789	1620	28.332	32.752	4.42032	0.000223953	0	-3.91086	1	1
Solyc00g244290	SL3.0ch00	19010831	19012831	+	1510	56117	1102	36924	2.62	2.898	0.277718	0.00557867	-0.405757	-1.54516	0.802014	1
Solyc00g245200	SL3.0ch00	19032539	19034539	+	4040	16396	3418	11337	19.769	23.165	3.39599	3.69666e-14	0	-3.91086	1	1
Solyc00g249200	SL3.0ch00	19132495	19134495	-	1223	1775	1354	1808	40.794	42.821	2.02714	0.0497485	0	-3.91086	1	1
Solyc00g249205	SL3.0ch00	19132495	19134495	-	1223	1775	1354	1808	40.794	42.821	2.02714	0.0497485	0	-3.91086	1	1
Solyc00g249910	SL3.0ch00	19146953	19148953	+	1	19	1422	4224	5	25.186	20.186	0.0188909	1.17502	-3.19092	0.61525	1
Solyc00g256710	SL3.0ch00	19310166	19312166	-	1663	8460	1584	7414	16.428	17.604	1.17598	0.0156503	0.092336	2.04425	0.865836	1
Solyc00g265510	SL3.0ch00	19517239	19519239	-	5825	33539	5620	30585	14.798	15.523	0.724933	0.00322878	-2.26804	4.97836	0.00464193	0.303148
Solyc00g266110	SL3.0ch00	19532224	19534224	-	767	3868	468	1091	16.548	30.019	13.4712	6.44374e-28	1.78814	-3.87428	1	1
Solyc00g268310	SL3.0ch00	19584429	19586429	-	2518	7338	3032	6922	25.548	30.46	4.91223	3.09222e-14	0	-3.91086	1	1
Solyc00g269810	SL3.0ch00	19619201	19621201	-	959	6692	1053	6745	12.534	13.503	0.969153	0.036217	0	-3.91086	1	1
Solyc00g272810	SL3.0ch00	19688234	19690234	-	691	3315	752	2690	17.249	21.848	4.59864	6.41032e-07	-1.6662	-1.04024	0.175489	1
Solyc00g275310	SL3.0ch00	19745967	19747967	-	1290	3130	888	1973	29.186	31.038	1.85258	0.0432649	0	-3.91086	1	1
Solyc00g278110	SL3.0ch00	19810480	19812480	-	1047	2029	964	1681	34.038	36.446	2.40841	0.0284599	-4.88371	-0.872646	0.0618814	1
Solyc00g280110	SL3.0ch00	19855053	19857053	-	1532	3140	1550	2910	32.791	34.753	1.96227	0.0239512	3.03458	-2.64721	0.0974665	1
Solyc03g033920	SL3.0ch00	19875093	19877093	-	286	13096	410	11154	2.137	3.545	1.40829	3.24709e-11	0	-3.91086	1	1
Solyc00g281110	SL3.0ch00	19877327	19879327	-	421	24104	352	16203	1.717	2.126	0.40963	0.00184384	0	-3.67847	1	1
Solyc00g282510	SL3.0ch00	19908568	19910568	+	970	6706	1164	6063	12.637	16.106	3.46948	1.99673e-09	0	-3.91086	1	1
Solyc00g286020	SL3.0ch00	19985686	19987686	+	974	1837	503	821	34.65	37.991	3.34135	0.0185422	0	-3.91086	1	1
Solyc00g286030	SL3.0ch00	19986777	19988777	+	160	356	250	427	31.008	36.928	5.91987	0.0182934	0	-3.91086	1	1
Solyc00g294233	SL3.0ch00	20221505	20223505	-	5101	27875	5628	28105	15.469	16.684	1.21513	1.60662e-05	0	-3.87283	1	1
Solyc00g300730	SL3.0ch00	20315297	20317297	-	347	1438	362	1275	19.44	22.114	2.67385	0.0277772	0	-3.91086	1	1
Solyc00g304030	SL3.0ch00	20386217	20388217	+	4329	7241	4219	6042	37.416	41.117	3.70112	2.69616e-08	0	-3.91086	1	1
Solyc00g304035	SL3.0ch00	20425529	20427529	-	1148	4087	878	2507	21.929	25.938	4.00864	1.62337e-05	0	-3.91086	1	1
Solyc00g306830	SL3.0ch00	20445077	20447077	+	1177	4169	1110	3482	22.016	24.172	2.15601	0.00622001	0	-3.91086	1	1
Solyc00g308930	SL3.0ch00	20493455	20495455	-	2013	8157	1989	6716	19.794	22.849	3.05543	3.25882e-07	0	-3.91086	1	1
Solyc00g309530	SL3.0ch00	20503857	20505857	+	1163	13941	1424	12937	7.7	9.916	2.2158	3.28706e-11	0	-3.91086	1	1
Solyc00g316530	SL3.0ch00	20653674	20655674	+	4225	11660	1053	1996	26.597	34.536	7.93849	4.44432e-18	-2.80434	-3.05152	0.257525	1
Solyc00g320430	SL3.0ch00	20737048	20739048	+	1295	19092	1500	15881	6.352	8.63	2.27803	1.23575e-16	3.5963	-3.27111	0.428771	1
Solyc00g322630	SL3.0ch00	20783970	20785970	+	1486	8304	1512	7208	15.179	17.339	2.1607	5.31858e-05	0	-3.91086	1	1
Solyc00g322635	SL3.0ch00	20793648	20795648	+	2707	5856	3380	6051	31.613	35.839	4.2265	2.8618e-09	-1.91433	-3.87151	1	1
Solyc01g005000	SL3.0ch01	10922	12922	+	3845	8908	3350	7208	30.15	31.729	1.57973	0.00531916	-1.50025	5.49685	0.00226091	0.189387
Solyc01g005050	SL3.0ch01	55348	57348	+	1508	8801	1443	7444	14.628	16.237	1.60921	0.00132548	0	-3.91086	1	1
Solyc01g005070	SL3.0ch01	63646	65646	+	1342	6499	1354	6034	17.115	18.327	1.21185	0.0248056	0	-3.87249	1	1
Solyc01g005080	SL3.0ch01	73169	75169	-	797	7963	1101	7530	9.098	12.756	3.65817	2.41848e-14	-0.0882511	3.48798	0.87775	1
Solyc01g005160	SL3.0ch01	135970	137970	+	2509	8299	2062	6358	23.214	24.489	1.27503	0.0201652	1.31514	4.03479	0.289776	1
Solyc01g005170	SL3.0ch01	139245	141245	+	1466	8540	1499	6829	14.651	18	3.34831	1.34507e-09	0.355803	-2.12472	0.845799	1
Solyc01g005220	SL3.0ch01	171566	173566	+	1328	9819	1528	9118	11.914	14.353	2.43929	1.0866e-07	0.618825	5.40873	0.108146	1
Solyc01g005240	SL3.0ch01	183554	185554	+	3867	9697	3489	7959	28.509	30.477	1.96765	0.000452499	-0.174694	6.14433	0.537738	1
Solyc01g005260	SL3.0ch01	193625	195625	+	2060	2104	1800	1603	49.472	52.895	3.42284	0.00187259	0.203031	2.64239	0.69028	1
Solyc01g005280	SL3.0ch01	207266	209266	-	2079	7424	1865	5985	21.877	23.758	1.88066	0.0020368	-0.582619	-0.274105	0.561313	1
Solyc01g005290	SL3.0ch01	209394	211394	-	1251	5172	1107	4041	19.477	21.503	2.02662	0.00429286	-1.21967	3.2152	0.0698162	1
Solyc01g005295	SL3.0ch01	211044	213044	-	3929	9106	3390	7405	30.142	31.403	1.2615	0.0184794	-2.42895	1.99562	0.00572462	0.345292
Solyc01g005300	SL3.0ch01	214876	216876	+	2436	7316	2917	6890	24.979	29.744	4.76457	1.72286e-13	-0.479732	6.0498	0.116115	1
Solyc01g005305	SL3.0ch01	220138	222138	-	634	3689	634	1949	14.666	24.545	9.87936	1.9205e-23	0	-3.91086	1	1
Solyc01g005310	SL3.0ch01	225919	227919	-	1763	5915	1545	4473	22.962	25.673	2.71127	0.000178182	-2.18664	-2.32456	0.275997	1
Solyc01g005390	SL3.0ch01	274027	276027	+	2631	9888	2853	8921	21.016	24.231	3.2153	2.95368e-09	-0.633464	2.53992	0.433362	1
Solyc01g005410	SL3.0ch01	284692	286692	+	1280	12128	1080	9295	9.547	10.41	0.863099	0.0147183	-0.979519	2.41792	0.288252	1
Solyc01g005460	SL3.0ch01	321092	323092	-	2695	8865	2789	8636	23.313	24.411	1.09823	0.0250176	-0.51569	-0.216058	0.52656	1
Solyc01g005480	SL3.0ch01	330990	332990	+	6985	8732	7271	8666	44.442	45.623	1.18107	0.0179234	-0.0430485	2.97566	0.917575	1
Solyc01g005490	SL3.0ch01	340634	342634	-	4627	9137	3906	7326	33.617	34.776	1.15896	0.0267847	0.0332456	5.10328	0.907555	1
Solyc01g005500	SL3.0ch01	342743	344743	+	936	8684	984	7885	9.73	11.095	1.36509	0.00156453	5.62587	1.75513	0.034102	0.862308
Solyc01g005530	SL3.0ch01	356524	358524	-	4409	7776	4857	5837	36.184	45.418	9.23416	1.91591e-44	0.0845143	3.28064	0.817982	1
Solyc01g005540	SL3.0ch01	370504	372504	-	2680	7528	3573	6970	26.254	33.89	7.63587	3.41232e-32	-0.195523	3.68431	0.554585	1
Solyc01g005550	SL3.0ch01	380342	382342	+	4661	9650	4632	7683	32.569	37.613	5.04332	2.23141e-17	0.305464	5.38073	0.319757	1
Solyc01g005575	SL3.0ch01	409305	411305	-	561	7261	714	5872	7.172	10.841	3.6691	2.79552e-14	0.138377	5.66697	0.623109	1
Solyc01g005590	SL3.0ch01	414886	416886	+	4668	9826	5079	8935	32.206	36.242	4.0359	1.25911e-12	-0.547271	3.87187	0.459755	1
Solyc01g005600	SL3.0ch01	426353	428353	-	3577	9647	4027	9218	27.049	30.404	3.35462	2.27758e-09	-0.200655	6.32429	0.468718	1
Solyc01g005610	SL3.0ch01	425654	427654	+	2889	7801	3328	8331	27.025	28.544	1.51921	0.00636055	1.94277	-3.34553	1	1
Solyc01g005620	SL3.0ch01	435080	437080	-	2908	9331	3304	7635	23.76	30.204	6.44375	1.51325e-27	-0.296969	8.05028	0.268018	1
Solyc01g005670	SL3.0ch01	464434	466434	+	1033	6073	1336	5556	14.537	19.385	4.84778	4.22146e-14	0.502684	2.15066	0.273788	1
Solyc01g005680	SL3.0ch01	470528	472528	+	2951	10478	3555	8386	21.975	29.771	7.79655	2.4298e-44	0	-3.62026	1	1
Solyc01g005690	SL3.0ch01	480426	482426	-	144	1556	241	1981	8.471	10.846	2.3755	0.00795327	-0.349297	5.53446	0.231754	1
Solyc01g005705	SL3.0ch01	493420	495420	-	784	3075	821	2617	20.316	23.88	3.56402	0.000183588	0	-3.79024	1	1
Solyc01g005740	SL3.0ch01	494469	496469	-	1485	5728	2208	4786	20.588	31.57	10.9821	4.25982e-49	0	-3.91086	1	1
Solyc01g005750	SL3.0ch01	493110	495110	+	579	2155	614	1513	21.178	28.867	7.68919	1.0112e-09	0	-3.75846	1	1
Solyc01g005755	SL3.0ch01	494500	496500	+	1487	5696	2208	4667	20.702	32.116	11.4147	5.011e-52	-1.40319	-3.64192	0.772236	1
Solyc01g005760	SL3.0ch01	494506	496506	+	1487	5720	2208	4667	20.633	32.116	11.4836	9.03083e-53	0.746646	4.73237	0.234936	1
Solyc01g005795	SL3.0ch01	508898	510898	-	3120	9265	2663	7272	25.192	26.804	1.61246	0.00374093	1.04421	-3.00548	0.665712	1
Solyc01g005800	SL3.0ch01	515973	517973	-	2712	7503	2866	6832	26.549	29.552	3.00329	2.31801e-06	1.27982	2.02874	0.148929	1
Solyc01g005810	SL3.0ch01	528366	530366	+	1172	9356	1170	7336	11.132	13.755	2.62278	5.22318e-08	0.508555	6.59137	0.0726017	1
Solyc01g005825	SL3.0ch01	556798	558798	+	1853	6800	1773	5560	21.415	24.178	2.76383	2.63292e-05	0	-3.82867	1	1
Solyc01g005840	SL3.0ch01	569880	571880	+	2076	6374	2187	5370	24.568	28.94	4.37201	6.23176e-10	-0.394509	3.80079	0.312377	1
Solyc01g005865	SL3.0ch01	583904	585904	-	185	2516	147	1583	6.849	8.497	1.64779	0.0229586	-0.775392	-2.68956	0.584902	1
Solyc01g005870	SL3.0ch01	584027	586027	-	184	2344	146	1435	7.278	9.235	1.95618	0.014802	-0.931456	0.55953	0.247588	1
Solyc01g005880	SL3.0ch01	583370	585370	+	195	2659	166	1631	6.833	9.238	2.4051	0.00203326	0	-3.91086	1	1
Solyc01g005890	SL3.0ch01	585983	587983	+	2380	7104	2803	6028	25.095	31.74	6.64556	9.2549e-23	0	-3.87203	1	1
Solyc01g005895	SL3.0ch01	591791	593791	-	73	2068	141	2204	3.41	6.013	2.60317	3.41632e-05	0	-3.91086	1	1
Solyc01g005910	SL3.0ch01	588593	590593	+	1809	9712	1808	8731	15.702	17.155	1.45357	0.00226225	-0.0735646	4.94696	0.793025	1
Solyc01g005920	SL3.0ch01	602186	604186	-	1482	10957	1544	9303	11.914	14.234	2.32021	1.69898e-07	-1.3534	1.46283	0.0220738	0.701811
Solyc01g005980	SL3.0ch01	652114	654114	-	2305	10763	2419	8593	17.639	21.967	4.32844	1.09422e-16	-0.070219	2.94093	0.869672	1
Solyc01g006000	SL3.0ch01	659939	661939	+	5361	8846	6000	7481	37.735	44.507	6.77216	1.88299e-29	-0.108068	4.46659	0.712202	1
Solyc01g006010	SL3.0ch01	668647	670647	+	4077	5532	4097	3682	42.429	52.667	10.2385	5.21255e-40	0.125371	4.21254	0.754069	1
Solyc01g006020	SL3.0ch01	681793	683793	-	4799	8134	5489	6774	37.107	44.761	7.65404	4.74016e-34	-1.00986	5.27614	0.0134763	0.561141
Solyc01g006050	SL3.0ch01	730061	732061	-	807	4922	728	3451	14.086	17.42	3.33421	5.84546e-06	0	-2.42497	1	1
Solyc01g006060	SL3.0ch01	735073	737073	+	714	7008	928	6378	9.246	12.702	3.45558	1.86502e-11	-1.82447	-3.51211	0.634397	1
Solyc01g006070	SL3.0ch01	740351	742351	-	608	4410	823	4037	12.116	16.934	4.81778	1.82523e-11	0	-3.91086	1	1
Solyc01g006080	SL3.0ch01	749861	751861	-	1347	9178	1637	7975	12.798	17.031	4.2327	9.2773e-17	-0.941241	-3.3552	0.659548	1
Solyc01g006100	SL3.0ch01	764489	766489	-	2363	5885	2306	3465	28.649	39.958	11.309	7.04775e-43	-0.481633	1.47575	0.594016	1
Solyc01g006110	SL3.0ch01	771927	773927	-	7491	8983	6636	6958	45.472	48.816	3.344	9.00094e-09	0.0959296	6.23848	0.709767	1
Solyc01g006130	SL3.0ch01	783062	785062	+	843	3079	1064	3403	21.494	23.819	2.32498	0.00624493	-0.334386	5.53023	0.32307	1
Solyc01g006140	SL3.0ch01	793463	795463	-	2019	9438	2443	8153	17.622	23.056	5.43346	5.43617e-23	-0.0813298	-0.480778	0.93532	1
Solyc01g006150	SL3.0ch01	801691	803691	-	3136	10069	3086	8770	23.749	26.029	2.28043	2.54442e-05	-0.606379	4.56318	0.118592	1
Solyc01g006160	SL3.0ch01	807962	809962	-	415	5884	576	5272	6.588	9.85	3.26117	8.53462e-11	0.306121	7.82334	0.327291	1
Solyc01g006200	SL3.0ch01	827575	829575	+	3099	10941	3135	8801	22.073	26.265	4.19243	7.79209e-15	-0.0380838	3.11725	0.9308	1
Solyc01g006210	SL3.0ch01	836543	838543	-	441	6155	484	5873	6.686	7.614	0.927784	0.0202451	-0.280964	1.43521	0.684979	1
Solyc01g006220	SL3.0ch01	851308	853308	-	1973	6494	2373	4871	23.302	32.758	9.45591	1.37354e-38	-0.619535	1.81497	0.178591	1
Solyc01g006230	SL3.0ch01	850613	852613	+	2276	8827	2799	7697	20.499	26.667	6.16834	6.7606e-26	0.111339	6.32078	0.689447	1
Solyc01g006240	SL3.0ch01	860918	862918	-	227	2768	215	2175	7.579	8.996	1.41652	0.0308483	-0.708012	0.646158	0.45865	1
Solyc01g006250	SL3.0ch01	864064	866064	-	7053	6428	7128	5636	52.318	55.845	3.52649	1.23936e-08	0.150848	1.7532	0.758058	1
Solyc01g006260	SL3.0ch01	864281	866281	+	7332	5837	7275	4969	55.676	59.417	3.74065	2.27396e-09	-0.103943	2.11748	0.862005	1
Solyc01g006270	SL3.0ch01	874392	876392	-	17	510	16	223	3.226	6.695	3.46875	0.0174693	0	-3.91086	1	1
Solyc01g006280	SL3.0ch01	871778	873778	+	2926	9740	2859	8796	23.101	24.53	1.42903	0.00509601	-0.34669	7.70616	0.274347	1
Solyc01g006320	SL3.0ch01	901445	903445	+	2258	9657	1946	7817	18.951	19.932	0.981496	0.0332213	-0.108615	1.34695	0.920229	1
Solyc01g006330	SL3.0ch01	907105	909105	+	2961	8114	2864	6796	26.736	29.648	2.91214	3.02915e-06	-1.53466	-0.571372	0.159865	1
Solyc01g006340	SL3.0ch01	912902	914902	+	4817	6764	4197	5223	41.594	44.554	2.96015	1.3897e-05	-0.0998144	3.00127	0.803711	1
Solyc01g006430	SL3.0ch01	1038597	1040597	-	1605	10611	1869	9391	13.139	16.599	3.46007	2.01999e-13	0.956368	8.24085	0.0510562	1
Solyc01g006440	SL3.0ch01	1053164	1055164	-	137	3583	134	2855	3.683	4.483	0.800309	0.0479327	-0.665274	-3.03957	0.789814	1
Solyc01g006450	SL3.0ch01	1055679	1057679	+	1302	6929	1213	4728	15.818	20.417	4.59919	3.68988e-12	-0.720681	5.61403	0.0488048	0.99772
Solyc01g006460	SL3.0ch01	1067132	1069132	-	1210	7161	1543	7790	14.455	16.533	2.07807	0.000105383	-5.38321	-1.07086	0.0119775	0.524372
Solyc01g006470	SL3.0ch01	1072811	1074811	-	1538	5991	1815	6374	20.428	22.164	1.7362	0.00453951	0	-3.91086	1	1
Solyc01g006490	SL3.0ch01	1086682	1088682	-	4036	8973	4053	8371	31.025	32.622	1.59767	0.00360482	0.461596	4.64758	0.131856	1
Solyc01g006500	SL3.0ch01	1092709	1094709	-	2881	6931	3317	6853	29.362	32.616	3.25353	6.47409e-07	-0.261579	3.0242	0.565275	1
Solyc01g006510	SL3.0ch01	1091446	1093446	+	2811	3867	3233	3456	42.093	48.333	6.23964	7.88682e-13	0.125774	6.26423	0.643629	1
Solyc01g006530	SL3.0ch01	1102222	1104222	+	2233	7192	2318	5984	23.692	27.921	4.22868	2.0785e-10	0	-3.87049	1	1
Solyc01g006540	SL3.0ch01	1111464	1113464	+	3621	10296	3534	8551	26.019	29.243	3.22432	8.45246e-09	2.07905	7.83987	0.0281906	0.792453
Solyc01g006560	SL3.0ch01	1132896	1134896	-	1934	5280	1652	3827	26.809	30.151	3.3425	2.98192e-05	-1.47297	-0.819997	0.1075	1
Solyc01g006570	SL3.0ch01	1145087	1147087	-	2235	5184	1928	3954	30.125	32.778	2.65261	0.000727451	0	-3.91086	1	1
Solyc01g006580	SL3.0ch01	1185045	1187045	-	1722	9122	1755	7776	15.88	18.414	2.53385	1.6443e-06	1.91685	-3.09303	0.411578	1
Solyc01g006600	SL3.0ch01	1207284	1209284	-	3867	8743	3783	7858	30.666	32.497	1.83107	0.00138365	-1.87595	-2.97816	0.409009	1
Solyc01g006610	SL3.0ch01	1212551	1214551	-	1390	9556	2201	9550	12.699	18.73	6.03162	1.00416e-34	0.643393	-0.452196	0.653632	1
Solyc01g006630	SL3.0ch01	1230306	1232306	-	5833	10265	5601	8774	36.234	38.963	2.72916	8.91088e-07	-0.338672	3.97664	0.361141	1
Solyc01g006640	SL3.0ch01	1233321	1235321	+	2653	8614	2774	7811	23.547	26.207	2.66026	4.83948e-06	0	-3.87049	1	1
Solyc01g006650	SL3.0ch01	1242768	1244768	+	644	4134	615	2658	13.478	18.79	5.31166	2.46955e-10	-1.2558	-0.877915	0.378114	1
Solyc01g006660	SL3.0ch01	1255271	1257271	-	5402	9120	5567	8308	37.199	40.123	2.92379	4.44437e-07	-0.04431	-2.81204	1	1
Solyc01g006680	SL3.0ch01	1264318	1266318	-	5026	11119	5153	9653	31.13	34.803	3.67308	1.0809e-11	-0.317801	5.90429	0.260955	1
Solyc01g006690	SL3.0ch01	1270429	1272429	-	4612	10446	4141	8911	30.628	31.727	1.0987	0.0236589	0.20179	1.93278	0.721633	1
Solyc01g006730	SL3.0ch01	1332072	1334072	-	1556	6839	1315	5374	18.535	19.659	1.1243	0.0388457	-5.53726	-2.43504	0.0160728	0.610936
Solyc01g006740	SL3.0ch01	1340485	1342485	-	5740	3770	5857	2729	60.358	68.216	7.85818	2.25394e-27	-0.206356	2.94886	0.588803	1
Solyc01g006750	SL3.0ch01	1341810	1343810	+	4230	18190	5044	12839	18.867	28.206	9.33848	7.1132e-106	0	-3.91086	1	1
Solyc01g006755	SL3.0ch01	1344209	1346209	-	2089	9868	2122	8518	17.471	19.944	2.47267	1.80956e-06	0	-3.91086	1	1
Solyc01g006780	SL3.0ch01	1360056	1362056	-	3344	6237	3547	4468	34.902	44.255	9.35211	1.27503e-35	-0.525192	-1.86124	0.751351	1
Solyc01g006790	SL3.0ch01	1358218	1360218	+	1769	6235	1744	5292	22.101	24.787	2.68536	8.33886e-05	-1.23585	-0.794035	0.164585	1
Solyc01g006800	SL3.0ch01	1362187	1364187	+	3461	9034	4529	8773	27.699	34.048	6.34843	1.84554e-27	0.15495	6.54677	0.56242	1
Solyc01g006810	SL3.0ch01	1370832	1372832	+	4501	7097	4439	6419	38.808	40.882	2.07388	0.000982373	-0.449469	4.12271	0.186386	1
Solyc01g006825	SL3.0ch01	1388400	1390400	+	6880	9124	6111	6107	42.989	50.016	7.02712	7.33474e-31	-0.329702	6.51249	0.458873	1
Solyc01g006840	SL3.0ch01	1415474	1417474	-	2089	6055	2183	5174	25.651	29.672	4.02163	2.74509e-08	4.14377	-3.69072	0.332837	1
Solyc01g006870	SL3.0ch01	1438520	1440520	-	4223	10505	4075	9390	28.673	30.264	1.59037	0.00211504	0.211902	4.3424	0.472526	1
Solyc01g006880	SL3.0ch01	1439706	1441706	+	4937	8705	5214	7534	36.19	40.901	4.71083	9.32827e-15	0.427651	5.05327	0.194442	1
Solyc01g006920	SL3.0ch01	1485514	1487514	+	4095	9225	3875	7784	30.743	33.236	2.49288	2.11166e-05	0.362218	0.315771	0.552946	1
Solyc01g006930	SL3.0ch01	1501974	1503974	+	3394	9701	3095	8293	25.918	27.178	1.25944	0.0135975	-1.19902	4.44443	0.00517614	0.320661
Solyc01g006950	SL3.0ch01	1517487	1519487	-	661	5328	747	5126	11.037	12.719	1.68232	0.00288641	1.23299	4.78704	0.277995	1
Solyc01g006960	SL3.0ch01	1539151	1541151	-	8247	7291	7788	5197	53.076	59.977	6.90057	1.04143e-30	0.151261	5.44206	0.574469	1
Solyc01g006970	SL3.0ch01	1539025	1541025	+	8279	7848	7872	5835	51.336	57.431	6.09424	3.46921e-25	0.574819	5.18677	0.0844491	1
Solyc01g006980	SL3.0ch01	1549134	1551134	+	1132	3772	1122	3234	23.083	25.758	2.67438	0.0017318	-0.394276	5.25067	0.162192	1
Solyc01g006990	SL3.0ch01	1557716	1559716	-	1206	4241	1584	5183	22.141	23.408	1.26709	0.0456926	0.40998	4.96938	0.163735	1
Solyc01g007025	SL3.0ch01	1577730	1579730	-	2125	7990	2098	7303	21.008	22.317	1.30837	0.0139756	1.27632	-1.43355	0.432813	1
Solyc01g007030	SL3.0ch01	1582763	1584763	-	1732	5982	1762	5082	22.453	25.745	3.29249	3.29542e-06	0.0918527	4.20892	0.933512	1
Solyc01g007040	SL3.0ch01	1583263	1585263	-	2583	8451	2500	6868	23.409	26.687	3.27713	8.21237e-08	0.0770549	3.13121	0.940726	1
Solyc01g007050	SL3.0ch01	1591140	1593140	-	1866	10084	1871	9025	15.615	17.171	1.55638	0.0009669	-0.776452	-3.22548	0.773726	1
Solyc01g007060	SL3.0ch01	1592423	1594423	+	5319	9959	4986	7993	34.815	38.416	3.60114	5.25594e-10	-0.0685504	4.0243	0.820633	1
Solyc01g007070	SL3.0ch01	1605813	1607813	-	2841	7354	3285	6798	27.867	32.58	4.71299	5.54542e-13	-0.032186	7.62231	0.907037	1
Solyc01g007080	SL3.0ch01	1632919	1634919	-	10	879	19	455	1.125	4.008	2.88358	0.000728327	0	-3.87229	1	1
Solyc01g007090	SL3.0ch01	1646002	1648002	+	4337	9230	4448	8387	31.967	34.655	2.68797	3.3304e-06	0	-3.87203	1	1
Solyc01g007100	SL3.0ch01	1657440	1659440	-	3931	5215	3655	4508	42.981	44.775	1.79467	0.00962563	-1.37237	3.82582	0.000499077	0.0628556
Solyc01g007110	SL3.0ch01	1656814	1658814	+	3932	4380	3628	3195	47.305	53.173	5.86799	1.33065e-12	0.204194	2.03106	0.724719	1
Solyc01g007120	SL3.0ch01	1667482	1669482	-	2740	8442	2857	7603	24.504	27.314	2.80991	2.29611e-06	-0.352973	2.93801	0.554269	1
Solyc01g007130	SL3.0ch01	1673642	1675642	+	2991	9217	3335	8684	24.5	27.748	3.24741	1.07755e-08	-0.311907	3.88865	0.425875	1
Solyc01g007140	SL3.0ch01	1680724	1682724	+	2748	7660	3481	7066	26.403	33.005	6.60188	7.67533e-25	0.386466	3.1621	0.33505	1
Solyc01g007150	SL3.0ch01	1720369	1722369	-	4554	10610	4229	8882	30.032	32.255	2.2237	4.47354e-05	0.0396043	6.72651	0.888644	1
Solyc01g007180	SL3.0ch01	1744700	1746700	-	4149	8994	4223	7825	31.568	35.051	3.48333	6.03065e-09	0.313107	2.91454	0.444961	1
Solyc01g007190	SL3.0ch01	1767139	1769139	+	1017	5743	968	3901	15.044	19.881	4.8365	1.66746e-11	-0.00355111	3.6497	0.996752	1
Solyc01g007200	SL3.0ch01	1771389	1773389	+	2970	7787	3533	6738	27.61	34.398	6.78789	1.17663e-25	-0.588106	-0.127686	0.443693	1
Solyc01g007210	SL3.0ch01	1776170	1778170	+	2596	6177	2146	4600	29.591	31.811	2.22065	0.00180386	0	-3.44584	1	1
Solyc01g007220	SL3.0ch01	1797708	1799708	+	992	8050	945	6480	10.971	12.727	1.75625	0.000375038	0.234232	8.61303	0.444817	1
Solyc01g007230	SL3.0ch01	1805192	1807192	-	6775	8378	5679	6550	44.711	46.439	1.72817	0.00262605	0.245127	3.90105	0.479387	1
Solyc01g007250	SL3.0ch01	1812614	1814614	-	1318	5972	1608	6816	18.08	19.088	1.00876	0.0496755	0.167342	4.54561	0.582562	1
Solyc01g007265	SL3.0ch01	1835604	1837604	+	2020	10289	1630	7646	16.411	17.572	1.16147	0.0130688	-0.539905	2.53707	0.216709	1
Solyc01g007740	SL3.0ch01	1843784	1845784	-	2984	6562	3906	6606	31.259	37.158	5.89837	4.6753e-18	-0.0400524	5.05926	0.893783	1
Solyc01g007750	SL3.0ch01	1844890	1846890	+	4472	6323	4684	6281	41.427	42.718	1.29115	0.0265033	-0.630348	3.16344	0.15111	1
Solyc01g007760	SL3.0ch01	1849708	1851708	+	1882	7651	2023	6334	19.742	24.207	4.4653	1.06734e-12	0.0137962	5.0054	0.964599	1
Solyc01g007770	SL3.0ch01	1860634	1862634	+	7158	10067	7134	9001	41.556	44.214	2.65856	9.49375e-07	0	-3.91086	1	1
Solyc01g007790	SL3.0ch01	1872921	1874921	+	4525	9336	4880	7908	32.646	38.161	5.51522	1.91398e-20	0.101834	4.89638	0.731309	1
Solyc01g007810	SL3.0ch01	1907472	1909472	-	4869	8503	5378	7446	36.412	41.937	5.52509	1.81763e-19	-4.7301	-3.57274	0.0893122	1
Solyc01g007840	SL3.0ch01	1943272	1945272	-	3612	6790	4179	6339	34.724	39.732	5.0078	1.48358e-13	0.057045	4.41427	0.865784	1
Solyc01g007850	SL3.0ch01	1944753	1946753	+	4765	7886	4794	5905	37.665	44.808	7.14292	1.43722e-27	0.0592595	2.93566	0.903665	1
Solyc01g007855	SL3.0ch01	1947915	1949915	+	8	324	23	206	2.41	10.044	7.63403	9.43446e-05	0.133749	2.36161	0.772147	1
Solyc01g007860	SL3.0ch01	1957531	1959531	-	2139	8583	2079	7727	19.95	21.201	1.25167	0.0138493	0.305098	6.0934	0.287592	1
Solyc01g007870	SL3.0ch01	1968452	1970452	-	1992	8116	2227	7844	19.707	22.113	2.40584	2.23661e-05	3.19528	1.92196	0.0518115	1
Solyc01g007900	SL3.0ch01	2038291	2040291	-	5932	7645	6598	7120	43.692	48.097	4.40585	5.42247e-13	0.157161	5.09404	0.565706	1
Solyc01g007910	SL3.0ch01	2038540	2040540	+	6455	7577	7172	7086	46.002	50.302	4.29959	8.62787e-13	0.303126	6.28127	0.325206	1
Solyc01g007930	SL3.0ch01	2056135	2058135	-	4980	8562	4614	7336	36.774	38.611	1.8364	0.0015589	0.557099	4.44775	0.116301	1
Solyc01g007940	SL3.0ch01	2064704	2066704	-	3986	6362	5287	6379	38.52	45.32	6.80021	9.32988e-24	-2.1335	-1.44042	0.0648188	1
Solyc01g007950	SL3.0ch01	2072713	2074713	-	608	2725	1000	3435	18.242	22.548	4.30609	3.09123e-06	0	-3.91086	1	1
Solyc01g007955	SL3.0ch01	2078656	2080656	-	7907	7799	7698	6585	50.344	53.896	3.55242	1.07399e-09	0.833225	2.15338	0.101593	1
Solyc01g007980	SL3.0ch01	2095068	2097068	+	4916	8119	5315	7451	37.714	41.634	3.92018	1.8748e-10	-0.00779477	4.50865	0.98797	1
Solyc01g008000	SL3.0ch01	2108530	2110530	+	7346	5618	6860	4363	56.665	61.124	4.45987	3.83657e-12	0.430297	9.82419	0.121203	1
Solyc01g008030	SL3.0ch01	2127601	2129601	+	1380	10365	1897	9757	11.75	16.278	4.52799	8.23542e-23	1.07461	-3.69242	0.820614	1
Solyc01g008070	SL3.0ch01	2145601	2147601	+	2023	5462	2684	5002	27.027	34.921	7.89325	4.40141e-25	0.167849	5.52435	0.637808	1
Solyc01g008090	SL3.0ch01	2163677	2165677	-	5893	7436	5538	6589	44.212	45.667	1.45483	0.0106815	0.140259	7.32873	0.687439	1
Solyc01g008115	SL3.0ch01	2178244	2180244	-	2920	6300	2457	3932	31.67	38.457	6.78644	6.92561e-18	0	-3.91086	1	1
Solyc01g008120	SL3.0ch01	2198645	2200645	-	1864	7356	1823	6184	20.217	22.768	2.55066	3.81089e-05	0.320393	5.72842	0.288654	1
Solyc01g008130	SL3.0ch01	2206896	2208896	+	2238	9730	2793	9644	18.7	22.457	3.75732	7.66384e-13	0.285368	3.82397	0.476048	1
Solyc01g008140	SL3.0ch01	2225510	2227510	-	3026	10646	2525	8346	22.133	23.227	1.09411	0.0211445	-0.255474	4.60611	0.390407	1
Solyc01g008160	SL3.0ch01	2239912	2241912	-	4265	6147	5588	6236	40.962	47.26	6.29746	1.53192e-20	-0.302097	4.02135	0.439689	1
Solyc01g008170	SL3.0ch01	2241234	2243234	+	7695	7106	8191	6179	51.99	57.001	5.01097	2.5679e-17	0.0579928	5.29851	0.828769	1
Solyc01g008220	SL3.0ch01	2289692	2291692	-	5611	8467	5746	7940	39.857	41.985	2.128	0.00022151	-0.266614	2.42571	0.669749	1
Solyc01g008230	SL3.0ch01	2295195	2297195	-	1884	9473	2096	8355	16.589	20.055	3.46661	6.23882e-11	0.410441	6.05417	0.11907	1
Solyc01g008240	SL3.0ch01	2312454	2314454	-	4119	8937	4562	8584	31.549	34.703	3.15386	6.50246e-08	-1.8041	-3.87399	1	1
Solyc01g008250	SL3.0ch01	2312454	2314454	-	4119	8937	4562	8584	31.549	34.703	3.15386	6.50246e-08	-0.533398	1.17188	0.327629	1
Solyc01g008260	SL3.0ch01	2313051	2315051	+	4268	9279	4849	9129	31.505	34.69	3.1851	2.34309e-08	0.564277	3.71261	0.123876	1
Solyc01g008270	SL3.0ch01	2318489	2320489	+	2862	6562	2654	5461	30.369	32.705	2.3356	0.000608484	0.438373	4.81923	0.161288	1
Solyc01g008280	SL3.0ch01	2324182	2326182	+	1309	5772	1740	5583	18.486	23.761	5.27466	2.17276e-14	0.187362	5.36967	0.520047	1
Solyc01g008290	SL3.0ch01	2329217	2331217	+	1989	7260	1924	6537	21.505	22.74	1.2346	0.0236508	0.186707	3.61434	0.619175	1
Solyc01g008300	SL3.0ch01	2342094	2344094	-	4462	9377	4069	7554	32.242	35.008	2.76596	2.96116e-06	-0.557957	1.93262	0.275778	1
Solyc01g008320	SL3.0ch01	2359806	2361806	+	5202	8760	6088	8165	37.258	42.714	5.45554	3.28694e-20	0.532498	6.13021	0.0670438	1
Solyc01g008330	SL3.0ch01	2381098	2383098	+	4537	6352	5601	5859	41.666	48.874	7.20844	1.61708e-26	-0.451405	5.78318	0.220474	1
Solyc01g008340	SL3.0ch01	2395668	2397668	+	579	3936	1455	6523	12.824	18.238	5.41373	3.99381e-15	0.347032	4.74233	0.241659	1
Solyc01g008350	SL3.0ch01	2405142	2407142	+	1120	3926	1939	3243	22.196	37.418	15.2222	2.89262e-62	-0.671692	-0.149113	0.374928	1
Solyc01g008360	SL3.0ch01	2407027	2409027	+	802	4794	821	4356	14.332	15.859	1.52694	0.0139528	0.223455	5.99301	0.439313	1
Solyc01g008370	SL3.0ch01	2417918	2419918	-	5129	6910	6131	5686	42.603	51.883	9.27967	2.06819e-45	0.0143885	7.74719	0.957724	1
Solyc01g008400	SL3.0ch01	2417400	2419400	+	4980	5900	6038	5363	45.772	52.96	7.18821	4.482e-26	0.0877045	0.0844616	0.888577	1
Solyc01g008405	SL3.0ch01	2417727	2419727	+	5126	7167	6145	6075	41.699	50.286	8.58789	2.77971e-40	1.9444	-3.87079	1	1
Solyc01g008410	SL3.0ch01	2430124	2432124	-	4411	8600	3719	6398	33.902	36.76	2.85783	5.57493e-06	0	-3.91086	1	1
Solyc01g008430	SL3.0ch01	2451862	2453862	-	1715	5928	3641	8640	22.439	29.647	7.20859	1.89688e-28	0	-3.91086	1	1
Solyc01g008440	SL3.0ch01	2455095	2457095	+	1641	10211	1469	7705	13.846	16.013	2.16688	1.04592e-05	-0.162688	4.55181	0.670353	1
Solyc01g008450	SL3.0ch01	2472937	2474937	-	3922	9584	3765	8654	29.039	30.316	1.2775	0.0128227	1.46632	-2.62191	0.521711	1
Solyc01g008460	SL3.0ch01	2481622	2483622	-	4499	6189	4492	5410	42.094	45.365	3.27064	2.11538e-06	0.366894	4.23323	0.247911	1
Solyc01g008470	SL3.0ch01	2480815	2482815	+	4507	6611	4455	5574	40.538	44.421	3.88331	1.42668e-08	-0.134634	3.45162	0.715542	1
Solyc01g008472	SL3.0ch01	2491378	2493378	+	889	3431	1617	5324	20.579	23.296	2.71765	0.000485028	0	-3.91086	1	1
Solyc01g008476	SL3.0ch01	2496059	2498059	+	501	1967	968	2750	20.3	26.036	5.73567	1.86754e-07	0	-3.86883	1	1
Solyc01g008478	SL3.0ch01	2498578	2500578	+	557	1717	1119	2738	24.494	29.012	4.5179	9.546e-05	0	-3.91086	1	1
Solyc01g008480	SL3.0ch01	2500548	2502548	+	2375	6893	4038	8795	25.626	31.466	5.83994	1.1033e-20	0.12575	3.67507	0.782813	1
Solyc01g008493	SL3.0ch01	2517795	2519795	-	1644	7029	2472	9576	18.955	20.518	1.56255	0.00324436	0.140825	2.67988	0.764664	1
Solyc01g008497	SL3.0ch01	2548843	2550843	-	6393	8621	5936	7686	42.58	43.577	0.996309	0.0416623	3.64896	-0.116818	0.0546759	1
Solyc01g008520	SL3.0ch01	2553044	2555044	+	5317	7435	5783	7352	41.695	44.027	2.33199	0.000114312	-0.107913	1.49906	0.834822	1
Solyc01g008530	SL3.0ch01	2571653	2573653	-	2053	5915	2797	6120	25.766	31.367	5.60149	2.36741e-15	0.808573	1.66212	0.143662	1
Solyc01g008540	SL3.0ch01	2578563	2580563	-	6580	6741	6442	6206	49.396	50.933	1.53726	0.00733093	0.380454	4.5196	0.662191	1
Solyc01g008550	SL3.0ch01	2584641	2586641	-	3436	9600	4115	8786	26.358	31.897	5.53897	4.05954e-22	-0.149187	5.03723	0.828873	1
Solyc01g008560	SL3.0ch01	2598580	2600580	-	2747	10546	2732	9733	20.665	21.917	1.25236	0.00768081	0.0620637	5.44718	0.900437	1
Solyc01g008570	SL3.0ch01	2605315	2607315	-	5248	8177	5541	7872	39.091	41.311	2.21942	0.000155839	0	-3.91086	1	1
Solyc01g008580	SL3.0ch01	2607960	2609960	-	6917	8180	6447	6560	45.817	49.566	3.74857	5.17897e-10	0	-3.91086	1	1
Solyc01g008590	SL3.0ch01	2608664	2610664	+	6806	9707	6248	7376	41.216	45.86	4.64423	1.40571e-15	0	-3.91086	1	1
Solyc01g008600	SL3.0ch01	2615089	2617089	+	6246	10333	5501	8408	37.674	39.55	1.87577	0.000544941	-0.225763	4.09473	0.502089	1
Solyc01g008610	SL3.0ch01	2631211	2633211	-	6485	10321	5458	7711	38.587	41.446	2.85841	5.51098e-07	0	-3.62675	1	1
Solyc01g008620	SL3.0ch01	2633020	2635020	+	2242	9487	1959	7367	19.115	21.006	1.89078	0.000446272	8.31419	-1.16532	0.00530598	0.32553
Solyc01g008640	SL3.0ch01	2639327	2641327	+	2177	9390	2633	8929	18.821	22.773	3.95209	2.52925e-13	0	-3.86959	1	1
Solyc01g008650	SL3.0ch01	2648933	2650933	-	2412	9790	2988	9593	19.767	23.75	3.98285	6.62224e-14	0	-3.91086	1	1
Solyc01g008660	SL3.0ch01	2657841	2659841	-	3636	7366	3116	5638	33.049	35.595	2.54662	0.000130976	0.313634	3.06001	0.399665	1
Solyc01g008670	SL3.0ch01	2667796	2669796	-	2974	8533	3335	7832	25.845	29.865	4.01964	2.43353e-11	1.68893	-1.96782	0.436642	1
Solyc01g008690	SL3.0ch01	2679325	2681325	-	1130	6422	1459	6567	14.963	18.178	3.2155	7.83085e-08	1.7017	-2.04915	0.315995	1
Solyc01g008710	SL3.0ch01	2687380	2689380	+	2871	10352	3091	9482	21.712	24.584	2.87226	5.07822e-08	-4.27517	10.1427	0.00184752	0.165205
Solyc01g008730	SL3.0ch01	2709114	2711114	-	3589	8352	3431	6678	30.056	33.94	3.88394	1.02882e-09	0.304686	4.93619	0.241674	1
Solyc01g008740	SL3.0ch01	2707811	2709811	+	2780	5035	2836	4776	35.573	37.257	1.68435	0.0157163	0	-3.91086	1	1
Solyc01g008760	SL3.0ch01	2722192	2724192	+	4754	5017	4684	4113	48.654	53.245	4.59124	5.75186e-10	0.221637	3.24266	0.581631	1
Solyc01g008770	SL3.0ch01	2728760	2730760	+	6886	9359	6022	7330	42.388	45.102	2.71343	2.6506e-06	-0.052643	5.22956	0.85554	1
Solyc01g008780	SL3.0ch01	2750196	2752196	+	6140	8508	5996	7889	41.917	43.183	1.26631	0.0158129	-0.0912577	5.57392	0.744956	1
Solyc01g008790	SL3.0ch01	2758220	2760220	+	3057	9407	2886	7422	24.527	27.998	3.47103	3.87638e-09	-0.520357	4.20207	0.252964	1
Solyc01g008800	SL3.0ch01	2774775	2776775	-	4811	7819	4582	6228	38.092	42.387	4.29483	3.62241e-11	0.54084	-1.01086	0.597212	1
Solyc01g008810	SL3.0ch01	2774775	2776775	-	4811	7819	4582	6228	38.092	42.387	4.29483	3.62241e-11	0.933805	1.43634	0.0829546	1
Solyc01g008830	SL3.0ch01	2786576	2788576	+	4187	8527	4121	7919	32.932	34.228	1.29537	0.0158801	-1.11973	0.328201	0.141673	1
Solyc01g008840	SL3.0ch01	2796561	2798561	+	4844	8570	5002	6280	36.112	44.336	8.22459	2.46197e-38	0.429384	6.46595	0.101799	1
Solyc01g008850	SL3.0ch01	2810081	2812081	+	6955	10434	6768	8839	39.997	43.365	3.36861	7.83008e-10	0.239329	8.03442	0.419187	1
Solyc01g008890	SL3.0ch01	2852040	2854040	-	8534	9167	7474	7575	48.212	49.664	1.45246	0.00496486	0.180062	3.79302	0.578853	1
Solyc01g008900	SL3.0ch01	2853138	2855138	+	9597	8068	9724	6718	54.328	59.141	4.81346	1.08169e-18	0.551987	2.41205	0.188889	1
Solyc01g008910	SL3.0ch01	2868028	2870028	+	6231	8732	6338	7779	41.643	44.896	3.25351	2.61915e-08	0.916585	3.49617	0.039579	0.918664
Solyc01g008920	SL3.0ch01	2873873	2875873	+	6288	7122	5637	5831	46.89	49.154	2.26379	0.000264827	-0.753617	0.30827	0.377941	1
Solyc01g008925	SL3.0ch01	2875840	2877840	+	1002	2512	1365	2276	28.515	37.49	8.97519	1.65446e-15	-0.941952	1.82319	0.0944241	1
Solyc01g008930	SL3.0ch01	2890200	2892200	-	897	2038	990	1824	30.562	35.181	4.61906	0.000149223	-0.463912	3.20711	0.244949	1
Solyc01g008950	SL3.0ch01	2897502	2899502	-	4439	10467	4561	9173	29.78	33.21	3.4296	5.92003e-10	0.160173	7.79507	0.554567	1
Solyc01g008970	SL3.0ch01	2924248	2926248	-	3546	8807	3306	7252	28.706	31.313	2.60717	1.50119e-05	-0.0279667	8.04409	0.916431	1
Solyc01g009010	SL3.0ch01	2946699	2948699	+	147	4062	189	3636	3.493	4.941	1.44866	0.000913212	0.0669678	5.99752	0.84704	1
Solyc01g009030	SL3.0ch01	2958105	2960105	+	4727	7475	5043	6586	38.74	43.366	4.62617	7.9206e-13	0.140533	5.17021	0.595156	1
Solyc01g009040	SL3.0ch01	2974050	2976050	+	2915	9144	3013	8301	24.173	26.631	2.45791	1.39316e-05	-1.80615	-0.560492	0.0966431	1
Solyc01g009050	SL3.0ch01	2998631	3000631	-	5590	10299	5603	7990	35.182	41.22	6.03817	1.18802e-25	0.21365	5.57146	0.433927	1
Solyc01g009060	SL3.0ch01	2999584	3001584	+	8082	9021	8348	7305	47.255	53.332	6.07676	2.84153e-27	-0.0264417	5.41274	0.919014	1
Solyc01g009070	SL3.0ch01	3014833	3016833	-	1486	6785	1555	6397	17.966	19.555	1.58844	0.00555518	-0.16413	4.08488	0.636826	1
Solyc01g009080	SL3.0ch01	3022792	3024792	+	7931	8561	8319	7248	48.09	53.44	5.34999	4.31037e-21	-1.15254	2.75123	0.0526534	1
Solyc01g009090	SL3.0ch01	3042442	3044442	-	3767	7401	4254	7772	33.73	35.373	1.64306	0.00486524	0.252881	6.29009	0.3764	1
Solyc01g009100	SL3.0ch01	3044067	3046067	+	5790	9948	5702	8145	36.79	41.179	4.38866	2.46348e-14	0.0182148	7.06217	0.961933	1
Solyc01g009140	SL3.0ch01	3096447	3098447	+	575	2198	579	1958	20.736	22.822	2.08657	0.031974	0	-3.79747	1	1
Solyc01g009150	SL3.0ch01	3098610	3100610	+	3086	6680	2470	5030	31.599	32.933	1.33391	0.030369	0.137214	3.52943	0.694677	1
Solyc01g009160	SL3.0ch01	3107370	3109370	-	1336	8465	1443	7679	13.631	15.819	2.18764	1.85564e-05	0.488033	6.50042	0.405626	1
Solyc01g009180	SL3.0ch01	3160891	3162891	+	2951	7788	3009	7136	27.479	29.66	2.18065	0.000341379	0.186038	5.66637	0.498768	1
Solyc01g009200	SL3.0ch01	3175775	3177775	-	605	4742	578	3020	11.315	16.064	4.74972	1.71471e-10	-0.965351	-2.97724	0.647355	1
Solyc01g009240	SL3.0ch01	3200574	3202574	+	3839	7764	3814	6113	33.086	38.42	5.3342	9.5783e-16	0	-3.69544	1	1
Solyc01g009245	SL3.0ch01	3211020	3213020	-	2410	8496	1773	5563	22.098	24.168	2.07056	0.000742297	-1.4319	1.75047	0.0434455	0.95675
Solyc01g009250	SL3.0ch01	3213221	3215221	-	2982	7942	2994	7380	27.298	28.861	1.56292	0.00623735	0.0238964	0.191455	0.983916	1
Solyc01g009270	SL3.0ch01	3227063	3229063	-	1653	8460	2063	9655	16.345	17.605	1.2601	0.00761246	0.63186	-2.76527	1	1
Solyc01g009290	SL3.0ch01	3269975	3271975	-	3518	7052	3425	5972	33.283	36.448	3.16493	2.66799e-06	0.149565	4.4222	0.627034	1
Solyc01g009300	SL3.0ch01	3279040	3281040	-	4534	9179	4714	7693	33.064	37.995	4.93116	2.32112e-16	0.126879	5.273	0.69818	1
Solyc01g009307	SL3.0ch01	3358218	3360218	-	276	1221	437	1552	18.437	21.971	3.53397	0.00602803	0	-3.91086	1	1
Solyc01g009310	SL3.0ch01	3417720	3419720	+	6477	6811	5273	4869	48.743	51.992	3.24849	8.39486e-07	-0.0741274	7.6812	0.814147	1
Solyc01g009320	SL3.0ch01	3437210	3439210	-	1399	9461	1572	8141	12.882	16.184	3.30236	2.89524e-11	0	-3.86959	1	1
Solyc01g009330	SL3.0ch01	3450289	3452289	-	646	9543	717	8906	6.34	7.451	1.11073	0.00135916	3.59672	-3.76036	0.440871	1
Solyc01g009335	SL3.0ch01	3463891	3465891	+	1850	5382	1907	4650	25.581	29.083	3.50267	3.79852e-06	-4.36186	-3.53624	0.178607	1
Solyc01g009340	SL3.0ch01	3470634	3472634	+	1815	7237	1993	6274	20.051	24.108	4.05708	1.84187e-10	-0.523623	-0.296373	0.609468	1
Solyc01g009350	SL3.0ch01	3476831	3478831	-	1919	7896	1877	6570	19.552	22.221	2.6692	8.13967e-06	0	-3.91086	1	1
Solyc01g009360	SL3.0ch01	3482210	3484210	-	1948	9162	2136	9085	17.534	19.036	1.50198	0.00228535	0	-3.91086	1	1
Solyc01g009370	SL3.0ch01	3498232	3500232	-	4981	8452	4726	7553	37.08	38.488	1.40815	0.0107667	0	-3.35572	1	1
Solyc01g009380	SL3.0ch01	3504027	3506027	+	9485	6952	9509	5536	57.705	63.204	5.49854	9.74055e-23	0.0153318	4.62822	0.958666	1
Solyc01g009390	SL3.0ch01	3535062	3537062	-	2916	6012	2673	4562	32.661	36.945	4.28411	1.52488e-08	0.192858	4.40821	0.572981	1
Solyc01g009400	SL3.0ch01	3538576	3540576	+	485	6391	646	5646	7.054	10.267	3.21349	8.44748e-11	-1.8041	-3.87399	1	1
Solyc01g009410	SL3.0ch01	3543927	3545927	+	3258	9328	3483	7822	25.886	30.809	4.92347	9.63059e-17	0	-3.87342	1	1
Solyc01g009430	SL3.0ch01	3570152	3572152	-	4909	9054	4408	7455	35.157	37.158	2.00035	0.000573311	0.151635	7.86031	0.738082	1
Solyc01g009420	SL3.0ch01	3553649	3555649	+	6235	7887	6603	7546	44.151	46.668	2.51664	1.81079e-05	0.235643	8.58766	0.389934	1
Solyc01g009450	SL3.0ch01	3615767	3617767	-	5263	9190	5426	8097	36.415	40.124	3.70965	2.57069e-10	-0.020885	7.02751	0.938034	1
Solyc01g009490	SL3.0ch01	3659537	3661537	-	2519	8785	2555	7745	22.284	24.806	2.52168	1.1128e-05	0	-3.91086	1	1
Solyc01g009510	SL3.0ch01	3704286	3706286	+	1717	4833	1266	3085	26.214	29.097	2.88302	0.000650981	-5.90034	-3.21707	0.0287252	0.794866
Solyc01g009520	SL3.0ch01	3712707	3714707	+	3247	9794	2695	7363	24.898	26.795	1.89619	0.00071196	0.361385	7.84449	0.203591	1
Solyc01g009540	SL3.0ch01	3717705	3719705	+	547	4711	578	4136	10.403	12.261	1.85815	0.00211621	0	-3.91086	1	1
Solyc01g009560	SL3.0ch01	3748390	3750390	-	1680	8276	1953	7188	16.874	21.365	4.49103	7.0696e-15	0	-3.91086	1	1
Solyc01g009565	SL3.0ch01	3753514	3755514	+	1923	4823	2514	4772	28.506	34.505	5.99875	4.78956e-14	-1.77063	-3.46136	0.555515	1
Solyc01g009570	SL3.0ch01	3754018	3756018	+	1836	3830	2444	3862	32.404	38.757	6.35293	8.30536e-13	0.786773	-3.72822	1	1
Solyc01g009590	SL3.0ch01	3766335	3768335	-	4626	9234	4810	7882	33.377	37.898	4.52127	3.47865e-14	0	-3.91086	1	1
Solyc01g009600	SL3.0ch01	3771753	3773753	-	3289	6094	3267	4841	35.053	40.294	5.24078	1.82764e-12	0	-3.91086	1	1
Solyc01g009620	SL3.0ch01	3784756	3786756	+	698	6352	799	6609	9.901	10.786	0.884928	0.0397794	-0.0782816	4.46808	0.789762	1
Solyc01g009635	SL3.0ch01	3815307	3817307	-	1704	7606	1893	6627	18.303	22.218	3.91541	1.16566e-10	0	-3.91086	1	1
Solyc01g009640	SL3.0ch01	3816190	3818190	-	863	4716	1116	4350	15.469	20.417	4.9484	1.92079e-11	0	-3.91086	1	1
Solyc01g009650	SL3.0ch01	3819523	3821523	+	1262	5308	1112	4127	19.209	21.225	2.0169	0.00391496	0	-3.87229	1	1
Solyc01g009645	SL3.0ch01	3819590	3821590	+	1205	5775	1111	4643	17.264	19.308	2.0447	0.001892	0	-3.91086	1	1
Solyc01g009660	SL3.0ch01	3833739	3835739	-	1319	8447	1292	7062	13.506	15.466	1.9596	0.000135643	-0.504133	-1.41509	0.760358	1
Solyc01g009695	SL3.0ch01	3908955	3910955	+	273	1293	364	919	17.433	28.371	10.9381	6.67831e-12	-1.93935	-3.87098	1	1
Solyc01g009700	SL3.0ch01	3910981	3912981	+	307	3170	418	3271	8.829	11.331	2.50153	0.000328034	0.655274	1.62173	0.445506	1
Solyc01g009710	SL3.0ch01	3919295	3921295	+	2134	4355	1538	2936	32.886	34.376	1.48997	0.0494026	0.806184	-2.09358	0.45132	1
Solyc01g009730	SL3.0ch01	3982582	3984582	-	2045	6965	1969	6036	22.697	24.597	1.90012	0.00214768	0	-3.91086	1	1
Solyc01g009740	SL3.0ch01	4038809	4040809	-	234	5295	285	4795	4.232	5.61	1.37801	0.000749099	0	-3.91086	1	1
Solyc01g009760	SL3.0ch01	4070550	4072550	+	6156	8849	5974	8095	41.026	42.462	1.43583	0.00724458	-0.0720625	2.49585	0.904902	1
Solyc01g009780	SL3.0ch01	4137249	4139249	+	4446	9674	4402	8142	31.487	35.092	3.60522	6.46322e-10	0.319509	6.75372	0.382244	1
Solyc01g009790	SL3.0ch01	4173224	4175224	+	2057	3311	2748	3395	38.32	44.734	6.41417	6.00206e-12	0	-3.91086	1	1
Solyc01g009810	SL3.0ch01	4183116	4185116	+	1767	8289	1561	6851	17.572	18.557	0.985225	0.0390609	10.4758	0.898053	9.10703e-05	0.0179733
Solyc01g009830	SL3.0ch01	4257069	4259069	+	4519	7801	5422	7040	36.68	43.508	6.82807	3.42446e-27	0.313544	3.68651	0.635815	1
Solyc01g009860	SL3.0ch01	4318203	4320203	-	3592	10057	4079	8180	26.317	33.274	6.95657	1.97411e-33	0.866762	5.19781	0.0348784	0.873237
Solyc01g009870	SL3.0ch01	4342363	4344363	-	3645	7568	3276	5785	32.507	36.155	3.64804	5.96494e-08	-0.275932	5.90475	0.703147	1
Solyc01g009880	SL3.0ch01	4344966	4346966	+	1651	6846	1716	6151	19.43	21.813	2.38225	0.000125944	0	-3.91086	1	1
Solyc01g009900	SL3.0ch01	4393714	4395714	+	3553	9751	3545	8169	26.706	30.263	3.55668	7.11852e-10	0	-3.91086	1	1
Solyc01g009910	SL3.0ch01	4411264	4413264	+	2154	6681	2161	5924	24.38	26.729	2.3482	0.000323001	0	-3.91086	1	1
Solyc01g009920	SL3.0ch01	4428529	4430529	-	917	7705	1129	6780	10.636	14.275	3.63929	2.56267e-12	0	-3.51775	1	1
Solyc01g009930	SL3.0ch01	4459316	4461316	-	3054	6489	2858	5008	32.003	36.334	4.33107	2.56842e-09	2.25614	-1.95204	0.160703	1
Solyc01g009940	SL3.0ch01	4475860	4477860	+	4334	8044	3943	6613	35.014	37.353	2.33943	0.000173166	0	-3.91086	1	1
Solyc01g009960	SL3.0ch01	4490190	4492190	-	4082	7318	4020	6255	35.807	39.124	3.31707	4.77453e-07	0	-3.86883	1	1
Solyc01g009980	SL3.0ch01	4518809	4520809	+	3168	8524	2278	5449	27.095	29.481	2.38559	0.000217305	0	-3.91086	1	1
Solyc01g010000	SL3.0ch01	4551904	4553904	-	2749	7357	2773	6125	27.202	31.164	3.96264	2.71084e-09	0.777646	3.62062	0.0186372	0.655473
Solyc01g010030	SL3.0ch01	4607332	4609332	-	3697	7729	3703	7122	32.356	34.208	1.85182	0.00210915	-0.565153	2.9052	0.156662	1
Solyc01g010035	SL3.0ch01	4595475	4597475	+	174	1096	237	1217	13.701	16.3	2.59908	0.0291466	-5.03621	-3.08346	0.153187	1
Solyc01g010060	SL3.0ch01	4624224	4626224	-	5454	8733	5581	7564	38.444	42.457	4.01356	2.37272e-11	0.573434	5.49708	0.230225	1
Solyc01g010080	SL3.0ch01	4734564	4736564	+	1516	7638	2004	6613	16.561	23.256	6.69529	3.22509e-28	1.95427	-2.88745	0.400356	1
Solyc01g010090	SL3.0ch01	4768431	4770431	+	11691	10577	10650	7773	52.501	57.808	5.30683	5.31295e-26	0	-3.91086	1	1
Solyc01g010085	SL3.0ch01	4768542	4770542	+	11133	10374	9996	7601	51.765	56.805	5.0406	1.19293e-22	0	-3.91086	1	1
Solyc01g010087	SL3.0ch01	4771475	4773475	+	1542	5268	1600	4911	22.643	24.574	1.93063	0.00502296	0	-3.91086	1	1
Solyc01g010130	SL3.0ch01	4802976	4804976	+	4818	9811	4393	8335	32.935	34.514	1.57987	0.00337497	0	-3.91086	1	1
Solyc01g010135	SL3.0ch01	4803180	4805180	+	4734	10132	4301	8576	31.844	33.401	1.55616	0.00345623	-0.409166	3.00808	0.336081	1
Solyc01g010140	SL3.0ch01	4819924	4821924	-	518	6048	823	6872	7.889	10.695	2.80613	1.16274e-08	-1.91432	-3.87151	1	1
Solyc01g010160	SL3.0ch01	4885380	4887380	-	3790	6859	3169	5396	35.59	36.999	1.40922	0.0220461	0	1.27981	1	1
Solyc01g010170	SL3.0ch01	4903656	4905656	-	3996	11669	4748	10003	25.509	32.188	6.67855	8.90464e-37	0	0.795032	1	1
Solyc01g010180	SL3.0ch01	4909658	4911658	+	4600	7360	4258	6119	38.462	41.033	2.57152	6.99582e-05	-0.381873	4.75462	0.720351	1
Solyc01g010190	SL3.0ch01	4918301	4920301	+	7142	8569	6990	7425	45.459	48.491	3.03256	1.53137e-07	0.368951	5.22372	0.303624	1
Solyc01g010210	SL3.0ch01	4926330	4928330	+	1611	41472	1258	30060	3.739	4.017	0.277565	0.0261728	0	-3.91086	1	1
Solyc01g010230	SL3.0ch01	4944699	4946699	-	1196	6477	1384	6290	15.587	18.035	2.4478	4.17319e-05	0.216328	6.51727	0.585928	1
Solyc01g010240	SL3.0ch01	4962722	4964722	+	2768	7320	2608	6108	27.439	29.922	2.48344	0.000126174	0	-3.91086	1	1
Solyc01g010260	SL3.0ch01	4996180	4998180	+	2836	10916	2490	9112	20.622	21.462	0.839362	0.0476989	0	-3.91086	1	1
Solyc01g010270	SL3.0ch01	5003409	5005409	-	2798	11594	2699	8731	19.441	23.613	4.17194	1.19149e-15	-0.017111	6.90059	0.964447	1
Solyc01g010280	SL3.0ch01	5017979	5019979	-	985	5321	1033	3597	15.62	22.311	6.69097	2.70188e-18	0	-3.91086	1	1
Solyc01g010295	SL3.0ch01	5029668	5031668	-	1604	9084	1946	8908	15.007	17.929	2.92139	9.60518e-09	-0.763307	1.18397	0.122875	1
Solyc01g010300	SL3.0ch01	5055360	5057360	-	1570	6039	1730	5563	20.633	23.721	3.08792	5.36662e-06	-1.81	-3.2448	0.516982	1
Solyc01g010310	SL3.0ch01	5077993	5079993	-	3280	8226	3734	8099	28.507	31.556	3.04895	3.98301e-07	-0.578465	3.2554	0.268338	1
Solyc01g010350	SL3.0ch01	5097729	5099729	-	4453	7782	4728	6070	36.396	43.786	7.3903	2.29372e-29	0	-3.47068	1	1
Solyc01g010360	SL3.0ch01	5114498	5116498	-	1196	6208	561	2356	16.153	19.232	3.07866	0.000157079	-1.52767	-0.330225	0.154686	1
Solyc01g010370	SL3.0ch01	5140792	5142792	-	1826	9525	1992	8156	16.087	19.629	3.5428	1.96267e-11	-0.431373	1.90014	0.358725	1
Solyc01g010393	SL3.0ch01	5204802	5206802	+	438	2813	337	1359	13.473	19.87	6.39751	8.87045e-09	0	-3.91086	1	1
Solyc01g010397	SL3.0ch01	5215115	5217115	+	1914	7831	1762	6553	19.641	21.191	1.54978	0.00553995	0	-3.91086	1	1
Solyc01g010400	SL3.0ch01	5246952	5248952	-	1799	5162	1682	4518	25.844	27.129	1.28504	0.0444397	0	-3.91086	1	1
Solyc01g010410	SL3.0ch01	5253863	5255863	+	2499	2765	2926	2323	47.473	55.744	8.27055	6.44169e-17	0.44844	2.64989	0.356393	1
Solyc01g010430	SL3.0ch01	5281639	5283639	+	2863	8290	3414	7552	25.67	31.133	5.46237	7.45189e-19	0.321014	6.79427	0.569116	1
Solyc01g010440	SL3.0ch01	5292953	5294953	-	3263	7058	3083	5930	31.615	34.206	2.59099	9.741e-05	0.545138	6.10506	0.0973408	1
Solyc01g010460	SL3.0ch01	5298821	5300821	+	4511	10311	4254	7823	30.434	35.224	4.78949	2.2995e-16	-0.00444387	1.60746	1	1
Solyc01g010490	SL3.0ch01	5320344	5322344	-	5718	6790	5502	5708	45.715	49.081	3.36643	2.24008e-07	0.910757	5.11959	0.148213	1
Solyc01g010497	SL3.0ch01	5370286	5372286	-	2427	5896	2408	5074	29.16	32.184	3.02375	3.05686e-05	0	-3.91086	1	1
Solyc01g010500	SL3.0ch01	5395204	5397204	-	5159	11019	4405	8550	31.889	34.002	2.11333	0.000104553	-4.18955	-3.66935	0.193951	1
Solyc01g010502	SL3.0ch01	5411620	5413620	+	678	7811	848	7606	7.987	10.031	2.04395	3.04251e-06	0	-3.91086	1	1
Solyc01g010504	SL3.0ch01	5419795	5421795	+	2755	5445	2847	4877	33.598	36.859	3.26158	1.40592e-05	0	-3.91086	1	1
Solyc01g010506	SL3.0ch01	5441999	5443999	+	2640	9458	3050	8149	21.822	27.235	5.41279	3.48508e-21	0	-3.91086	1	1
Solyc01g010510	SL3.0ch01	5455874	5457874	-	7490	8564	6685	6598	46.655	50.327	3.67245	5.47557e-10	-0.334803	0.539897	0.534255	1
Solyc01g010520	SL3.0ch01	5479930	5481930	+	5922	9327	6031	8849	38.835	40.531	1.69558	0.00163306	-0.600301	2.07913	0.216104	1
Solyc01g010540	SL3.0ch01	5495776	5497776	+	1319	4652	1453	4244	22.09	25.505	3.41455	1.23703e-05	0.202065	6.43986	0.490576	1
Solyc01g010550	SL3.0ch01	5502932	5504932	-	1758	6009	1457	4372	22.634	24.996	2.36149	0.00087214	0	-3.91086	1	1
Solyc01g010580	SL3.0ch01	5532841	5534841	+	4089	6567	4645	5582	38.373	45.419	7.04624	3.01986e-24	0.169436	8.11103	0.56151	1
Solyc01g010590	SL3.0ch01	5537228	5539228	+	3568	6934	3931	6574	33.974	37.42	3.4458	2.07091e-07	0.0166857	4.55317	0.955683	1
Solyc01g010600	SL3.0ch01	5554065	5556065	-	3482	8312	3364	7075	29.523	32.225	2.70182	1.12582e-05	0	-3.91086	1	1
Solyc01g010640	SL3.0ch01	5587678	5589678	+	1904	9427	2296	8656	16.803	20.964	4.16075	4.79085e-15	-0.461015	4.51371	0.198454	1
Solyc01g010650	SL3.0ch01	5604422	5606422	-	6257	9706	6328	8923	39.197	41.492	2.29547	2.84498e-05	0.478325	5.48461	0.0900089	1
Solyc01g010660	SL3.0ch01	5615545	5617545	+	5225	9720	5849	7889	34.962	42.575	7.61381	8.5901e-39	0.0754237	5.97609	0.879009	1
Solyc01g010670	SL3.0ch01	5633585	5635585	+	1593	7180	1310	5331	18.158	19.726	1.56796	0.00764026	0	-3.91086	1	1
Solyc01g010690	SL3.0ch01	5646186	5648186	+	1974	9393	2139	8349	17.366	20.395	3.02868	1.29192e-08	3.59677	-3.69398	0.442195	1
Solyc01g010700	SL3.0ch01	5674443	5676443	-	5521	8492	5807	8370	39.399	40.961	1.56158	0.00427023	-0.105184	5.0912	0.700912	1
Solyc01g010710	SL3.0ch01	5684412	5686412	-	6656	9233	7122	7051	41.891	50.25	8.35986	1.8671e-46	-1.5345	-0.629913	0.11271	1
Solyc01g010740	SL3.0ch01	5725249	5727249	-	1299	5413	1175	4394	19.353	21.099	1.74554	0.00888686	0	-3.91086	1	1
Solyc01g010750	SL3.0ch01	5731640	5733640	-	6953	11043	6506	8899	38.636	42.233	3.59668	4.01549e-11	-0.202395	8.73572	0.475629	1
Solyc01g010760	SL3.0ch01	5762954	5764954	+	5965	10474	5416	9028	36.286	37.497	1.21088	0.0143309	-0.0652107	3.07676	0.879811	1
Solyc01g010770	SL3.0ch01	5772212	5774212	-	8625	7926	7441	5951	52.112	55.563	3.45137	3.30175e-09	1.40084	2.347	0.0279941	0.790911
Solyc01g010780	SL3.0ch01	5781530	5783530	-	5814	7524	5001	5835	43.59	46.152	2.56197	5.27107e-05	-0.0136329	5.67425	0.960808	1
Solyc01g010810	SL3.0ch01	6156685	6158685	-	4110	8491	4325	8285	32.616	34.298	1.68172	0.00284346	-0.0280182	4.23894	0.932867	1
Solyc01g010820	SL3.0ch01	6160833	6162833	+	8548	8162	9221	7360	51.155	55.612	4.45685	9.62244e-16	0.159702	5.09144	0.564234	1
Solyc01g010835	SL3.0ch01	6180410	6182410	-	2908	5975	3100	5957	32.737	34.228	1.49098	0.0178137	-0.471315	2.02268	0.354659	1
Solyc01g010840	SL3.0ch01	6220360	6222360	+	1299	7654	1310	5851	14.509	18.294	3.78443	1.52934e-10	0	-3.91086	1	1
Solyc01g010860	SL3.0ch01	6241926	6243926	+	7287	8502	6993	6929	46.152	50.23	4.07747	3.93346e-12	-0.167461	4.6961	0.599145	1
Solyc01g010890	SL3.0ch01	6282902	6284902	+	3412	10106	3177	7856	25.24	28.795	3.55501	5.9931e-10	0	-3.91086	1	1
Solyc01g010900	SL3.0ch01	6301352	6303352	-	4165	8968	4035	7858	31.714	33.928	2.21352	0.00014255	0	-3.91086	1	1
Solyc01g010910	SL3.0ch01	6374750	6376750	+	3263	8572	3381	7535	27.571	30.973	3.40212	2.06603e-08	0	-3.69517	1	1
Solyc01g010920	SL3.0ch01	6384358	6386358	-	1247	4007	1101	3002	23.734	26.834	3.09973	0.000431043	-0.184651	0.697166	0.742317	1
Solyc01g010933	SL3.0ch01	6387420	6389420	+	1230	7902	1567	6839	13.469	18.641	5.17233	3.98273e-20	1.60039	-3.32954	0.651621	1
Solyc01g010937	SL3.0ch01	6414523	6416523	+	1381	5232	1383	4208	20.883	24.736	3.85307	4.21178e-07	0.0882802	-3.20061	1	1
Solyc01g010950	SL3.0ch01	6457538	6459538	-	4527	9813	5208	8235	31.569	38.741	7.17231	6.71831e-35	0.103547	4.75747	0.717742	1
Solyc01g010960	SL3.0ch01	6544663	6546663	+	1585	5252	1781	5234	23.183	25.388	2.20577	0.00158936	-0.701167	-3.6613	1	1
Solyc01g010980	SL3.0ch01	6606352	6608352	+	985	4208	1123	4200	18.968	21.097	2.12928	0.00390966	0	-3.91086	1	1
Solyc01g011000	SL3.0ch01	6805801	6807801	-	6017	9301	5911	8034	39.281	42.388	3.10737	7.4589e-08	0.259625	8.05796	0.380819	1
Solyc01g011020	SL3.0ch01	6898990	6900990	-	1644	4052	1653	3611	28.862	31.402	2.53962	0.00238605	0	-3.74906	1	1
Solyc01g011025	SL3.0ch01	6948339	6950339	+	990	3603	1287	4075	21.555	24.002	2.4477	0.00225337	0.87889	0.98208	0.0909107	1
Solyc01g011030	SL3.0ch01	6950015	6952015	+	3	327	8	224	0.909	3.448	2.53918	0.0281707	0.527956	4.49528	0.101986	1
Solyc01g011050	SL3.0ch01	6968179	6970179	+	3651	9544	3475	8109	27.67	29.998	2.3287	4.19171e-05	0	-3.91086	1	1
Solyc01g011060	SL3.0ch01	6986946	6988946	-	1048	3120	1233	3195	25.144	27.846	2.70157	0.00269885	0	-3.91086	1	1
Solyc01g011070	SL3.0ch01	7101206	7103206	-	1361	6705	1564	6879	16.873	18.524	1.65093	0.00322685	0	-3.91086	1	1
Solyc01g011080	SL3.0ch01	7532128	7534128	-	163	7866	183	6905	2.03	2.582	0.551688	0.0131379	0.509813	2.13616	0.228683	1
Solyc01g011090	SL3.0ch01	7547993	7549993	+	6989	9268	7332	8347	42.991	46.763	3.77247	1.99981e-11	0	-3.91086	1	1
Solyc01g011091	SL3.0ch01	7547993	7549993	+	6989	9268	7332	8347	42.991	46.763	3.77247	1.99981e-11	0.444077	-1.75331	0.631016	1
Solyc01g011095	SL3.0ch01	7604209	7606209	+	1433	8328	1334	6148	14.681	17.829	3.14858	3.24245e-08	-0.619467	-0.474966	0.517251	1
Solyc01g011110	SL3.0ch01	7607035	7609035	+	243	5156	253	4512	4.501	5.31	0.808715	0.0310498	0	-3.91086	1	1
Solyc01g011096	SL3.0ch01	7801032	7803032	-	614	3588	570	2869	14.612	16.575	1.9625	0.00991827	0	-3.91086	1	1
Solyc01g011170	SL3.0ch01	7956575	7958575	-	464	7269	383	5219	6	6.837	0.836585	0.0254217	0	-3.91086	1	1
Solyc01g011175	SL3.0ch01	8010230	8012230	-	642	6012	892	6559	9.648	11.972	2.32322	8.41821e-06	0	-3.91086	1	1
Solyc01g011180	SL3.0ch01	8013330	8015330	-	780	2544	611	1717	23.466	26.246	2.78	0.0091516	4.81017	-3.17512	0.142993	1
Solyc01g011190	SL3.0ch01	8019475	8021475	-	549	5692	803	7357	8.797	9.841	1.04402	0.0177874	4.96751	-3.03977	0.0325369	0.844912
Solyc01g011225	SL3.0ch01	8087887	8089887	-	52	4218	50	2080	1.218	2.347	1.12962	0.0006252	0.752913	-2.39074	0.583863	1
Solyc01g011237	SL3.0ch01	8131924	8133924	-	797	5045	966	4726	13.643	16.971	3.3286	7.31533e-07	0	-3.91086	1	1
Solyc01g011260	SL3.0ch01	8174971	8176971	-	112	876	111	665	11.336	14.304	2.96809	0.0337164	0	-3.91086	1	1
Solyc01g011310	SL3.0ch01	8517272	8519272	-	662	4529	1315	5875	12.753	18.289	5.53645	1.52616e-16	0	-3.86883	1	1
Solyc01g011320	SL3.0ch01	8584199	8586199	-	1132	5006	1135	3944	18.442	22.347	3.90443	3.34767e-07	0	-3.91086	1	1
Solyc01g011330	SL3.0ch01	8602063	8604063	-	1421	7291	1338	6339	16.311	17.429	1.11785	0.0275831	0	-3.82996	1	1
Solyc01g011333	SL3.0ch01	8615534	8617534	-	2089	5848	1637	4209	26.32	28.002	1.68228	0.0145358	0	-3.87203	1	1
Solyc01g011335	SL3.0ch01	8618732	8620732	-	1600	5434	1911	5204	22.747	26.859	4.11209	1.91807e-08	0	-3.91086	1	1
Solyc01g011340	SL3.0ch01	8628052	8630052	+	6664	10188	5411	7275	39.544	42.653	3.10905	8.60502e-08	-0.214771	5.16121	0.427499	1
Solyc01g011350	SL3.0ch01	8648355	8650355	-	7334	8812	6919	7488	45.423	48.025	2.60225	4.72532e-06	-0.672258	6.56598	0.0203999	0.676165
Solyc01g011370	SL3.0ch01	8689408	8691408	+	4308	8454	4306	6854	33.756	38.584	4.82776	1.999e-14	0	-3.91086	1	1
Solyc01g011390	SL3.0ch01	8706149	8708149	-	725	6853	1317	7441	9.567	15.038	5.47051	1.42499e-25	-4.19186	-3.50037	0.199346	1
Solyc01g011393	SL3.0ch01	8731034	8733034	-	809	5699	1009	5238	12.431	16.152	3.7209	2.40828e-09	0	-3.91086	1	1
Solyc01g011397	SL3.0ch01	8853338	8855338	+	671	4642	946	4880	12.629	16.238	3.60816	7.64448e-08	0	-3.91086	1	1
Solyc01g011430	SL3.0ch01	9168578	9170578	-	7480	8557	7264	7980	46.642	47.652	1.00939	0.0355307	-2.41107	-2.63435	0.174212	1
Solyc01g011460	SL3.0ch01	9256936	9258936	-	3225	6993	3180	5149	31.562	38.18	6.6179	1.82086e-20	-0.515274	-2.75631	0.760428	1
Solyc01g011470	SL3.0ch01	9287912	9289912	-	852	2661	875	2366	24.253	26.998	2.74506	0.00566794	0	-3.91086	1	1
Solyc01g011480	SL3.0ch01	9329458	9331458	-	1237	5171	1502	4896	19.304	23.476	4.17209	1.03583e-08	0	-3.91086	1	1
Solyc01g011497	SL3.0ch01	9372169	9374169	-	1965	7756	2094	7120	20.214	22.726	2.51232	2.15477e-05	0	-3.69581	1	1
Solyc01g011530	SL3.0ch01	9504318	9506318	+	264	1459	533	2381	15.322	18.291	2.9689	0.00551775	0	-3.91086	1	1
Solyc01g012540	SL3.0ch01	9577178	9579178	-	712	4360	885	3876	14.038	18.589	4.55068	1.34722e-09	0	-3.91086	1	1
Solyc01g012560	SL3.0ch01	9609113	9611113	+	308	1676	254	952	15.524	21.061	5.53717	6.31229e-05	0	-3.91086	1	1
Solyc01g012580	SL3.0ch01	9651554	9653554	-	347	3058	401	2947	10.191	11.977	1.7864	0.0105378	0	-3.91086	1	1
Solyc01g012630	SL3.0ch01	9744890	9746890	-	389	1842	583	2417	17.436	19.433	1.99721	0.0319324	0	-3.91086	1	1
Solyc01g012640	SL3.0ch01	9745798	9747798	-	494	2901	649	2728	14.551	19.218	4.66743	2.94082e-07	0	-3.91086	1	1
Solyc01g012670	SL3.0ch01	9780148	9782148	-	420	2136	537	1813	16.432	22.851	6.41914	2.04191e-08	0	-3.91086	1	1
Solyc01g012680	SL3.0ch01	9778486	9780486	+	268	1624	446	2275	14.165	16.391	2.22613	0.0211104	0	-3.91086	1	1
Solyc01g012690	SL3.0ch01	9814096	9816096	-	2021	8557	2272	7359	19.106	23.59	4.4848	1.72076e-14	0	-3.91086	1	1
Solyc01g012750	SL3.0ch01	10010522	10012522	+	1645	6589	1574	5295	19.978	22.915	2.9364	1.03884e-05	0	-3.63748	1	1
Solyc01g013770	SL3.0ch01	10088680	10090680	-	590	5137	474	3665	10.302	11.452	1.14996	0.033498	0	-3.91086	1	1
Solyc01g013780	SL3.0ch01	10089410	10091410	-	577	5294	515	3614	9.828	12.473	2.64479	2.76481e-05	0	-3.91086	1	1
Solyc01g013790	SL3.0ch01	10088656	10090656	+	589	5143	470	3658	10.276	11.386	1.11001	0.0378316	0	-3.91086	1	1
Solyc01g013820	SL3.0ch01	10136325	10138325	+	663	2720	777	2623	19.598	22.853	3.25495	0.000704664	0	-3.91086	1	1
Solyc01g013830	SL3.0ch01	10147802	10149802	-	405	1732	554	1983	18.952	21.837	2.88501	0.00877752	0	-3.91086	1	1
Solyc01g013860	SL3.0ch01	10189659	10191659	+	407	2142	638	2797	15.967	18.574	2.60646	0.00496948	0	-3.91086	1	1
Solyc01g013870	SL3.0ch01	10223696	10225696	-	1655	5708	1979	5705	22.477	25.755	3.27756	2.51112e-06	0	-3.91086	1	1
Solyc01g013880	SL3.0ch01	10224574	10226574	-	1889	7349	2115	7077	20.448	23.009	2.56099	2.15998e-05	4.14377	-3.69072	0.33275	1
Solyc01g013890	SL3.0ch01	10283861	10285861	+	1928	6857	2196	6537	21.946	25.146	3.1995	5.98712e-07	-1.05259	-2.71284	0.475697	1
Solyc01g013895	SL3.0ch01	10294884	10296884	+	936	1874	1425	2221	33.31	39.084	5.77432	1.70952e-06	-0.112877	-3.20964	1	1
Solyc01g013910	SL3.0ch01	10320146	10322146	-	404	2848	400	2486	12.423	13.86	1.43689	0.0472453	0	-3.91086	1	1
Solyc01g013915	SL3.0ch01	10356480	10358480	+	344	2634	593	3022	11.551	16.404	4.8525	1.9551e-08	-0.0648369	-3.22081	1	1
Solyc01g013920	SL3.0ch01	10367693	10369693	-	662	5500	599	4223	10.743	12.422	1.67897	0.00379822	0	-3.91086	1	1
Solyc01g013930	SL3.0ch01	10366956	10368956	+	627	5352	606	4448	10.487	11.991	1.5038	0.00703462	0	-3.91086	1	1
Solyc01g013960	SL3.0ch01	10503204	10505204	-	402	3782	494	3503	9.608	12.359	2.75124	5.48633e-05	0	-3.91086	1	1
Solyc01g013980	SL3.0ch01	10650390	10652390	+	1149	5635	1459	6098	16.937	19.307	2.36969	0.000175849	0	-3.91086	1	1
Solyc01g013995	SL3.0ch01	10737461	10739461	+	899	7677	1297	6819	10.483	15.981	5.49804	4.61975e-25	0	-3.87203	1	1
Solyc01g014020	SL3.0ch01	10992293	10994293	-	1423	6762	1401	6085	17.385	18.715	1.32947	0.0162995	0	-3.91086	1	1
Solyc01g014050	SL3.0ch01	11040787	11042787	-	781	3894	1026	3859	16.706	21.003	4.29719	8.97019e-08	0	-3.91086	1	1
Solyc01g014090	SL3.0ch01	11213848	11215848	+	581	4506	472	3218	11.421	12.791	1.37006	0.0260789	0	-3.91086	1	1
Solyc01g014095	SL3.0ch01	11397087	11399087	+	864	3622	962	3201	19.26	23.108	3.84842	1.00659e-05	0	-3.91086	1	1
Solyc01g014100	SL3.0ch01	11512844	11514844	+	3313	7428	3734	6573	30.844	36.228	5.38338	3.42185e-16	-1.20864	-0.916662	0.384284	1
Solyc01g014130	SL3.0ch01	11609250	11611250	+	2360	6115	2204	5210	27.847	29.728	1.88093	0.00519356	0	-3.86883	1	1
Solyc01g014140	SL3.0ch01	11627709	11629709	+	2292	8119	2253	7495	22.015	23.112	1.09726	0.0304825	3.21703	-2.27959	0.325119	1
Solyc01g014143	SL3.0ch01	11645826	11647826	+	1405	4143	1770	4538	25.324	28.06	2.73517	0.000539359	1.90136	-3.87171	1	1
Solyc01g014150	SL3.0ch01	11649377	11651377	+	1434	5767	1688	5420	19.914	23.748	3.83399	3.28248e-08	0	-3.91086	1	1
Solyc01g014147	SL3.0ch01	11677273	11679273	+	1370	6169	1658	6136	18.172	21.273	3.1006	1.41566e-06	0	-3.91086	1	1
Solyc01g014180	SL3.0ch01	11697872	11699872	-	2678	6689	3326	6169	28.59	35.029	6.43923	8.64312e-21	0.319609	9.18962	0.279766	1
Solyc01g014210	SL3.0ch01	11779788	11781788	+	1002	3775	1073	3127	20.976	25.548	4.57211	3.0965e-07	0	-3.91086	1	1
Solyc01g014230	SL3.0ch01	11831053	11833053	-	4696	9463	5593	8350	33.166	40.113	6.94713	1.25323e-32	0.071547	4.42869	0.816831	1
Solyc01g014245	SL3.0ch01	11864759	11866759	+	1211	3959	1783	4629	23.424	27.807	4.38364	8.9866e-08	0.926578	3.24822	0.0438167	0.958553
Solyc01g014250	SL3.0ch01	11865561	11867561	+	655	4846	701	4603	11.907	13.216	1.30951	0.0208645	0.786689	4.16717	0.148422	1
Solyc01g014260	SL3.0ch01	11871960	11873960	+	1755	6773	1778	5385	20.579	24.822	4.24273	3.792e-10	0	-3.91086	1	1
Solyc01g014270	SL3.0ch01	11888252	11890252	+	5000	6075	5589	5671	45.147	49.636	4.48915	2.98652e-11	0.0413609	4.38718	0.893598	1
Solyc01g014310	SL3.0ch01	11962727	11964727	-	2781	7984	3287	7075	25.834	31.722	5.88795	1.29148e-20	0	-3.91086	1	1
Solyc01g014320	SL3.0ch01	11978676	11980676	+	1436	4359	1829	4404	24.78	29.344	4.56383	2.18233e-08	0	-3.87342	1	1
Solyc01g014350	SL3.0ch01	12063533	12065533	+	908	7811	958	6543	10.414	12.772	2.35759	2.75558e-06	0	-3.91086	1	1
Solyc01g014360	SL3.0ch01	12157214	12159214	-	618	6225	743	5997	9.031	11.024	1.99261	8.4529e-05	0	-3.91086	1	1
Solyc01g014390	SL3.0ch01	12867978	12869978	+	3107	7008	3775	6654	30.717	36.197	5.48039	2.45893e-16	5.34939	0.4447	7.84549e-11	7.79493e-08
Solyc01g014393	SL3.0ch01	12961959	12963959	-	1145	5152	961	3933	18.183	19.636	1.45303	0.0250218	0	-3.91086	1	1
Solyc01g014400	SL3.0ch01	13180771	13182771	+	624	4267	799	3944	12.758	16.846	4.08775	2.0377e-08	0	-3.91086	1	1
Solyc01g014410	SL3.0ch01	13447094	13449094	+	992	5822	788	4205	14.558	15.782	1.22383	0.0325824	0	-3.91086	1	1
Solyc01g014420	SL3.0ch01	13465375	13467375	+	545	3044	619	2933	15.185	17.427	2.24151	0.0057573	0	-3.91086	1	1
Solyc01g014450	SL3.0ch01	13581449	13583449	-	506	3234	469	2239	13.529	17.319	3.78964	2.54442e-05	0	-3.91086	1	1
Solyc01g014460	SL3.0ch01	13858627	13860627	-	946	5613	1309	6271	14.423	17.269	2.8462	3.61405e-06	0	-3.91086	1	1
Solyc01g014470	SL3.0ch01	13884187	13886187	-	4716	8746	5196	7851	35.032	39.825	4.79331	1.79808e-15	1.74392	0.465377	0.110433	1
Solyc01g014480	SL3.0ch01	13895626	13897626	-	6399	7045	6054	5554	47.597	52.154	4.55625	1.22679e-12	0.546726	4.30288	0.0644193	1
Solyc01g014495	SL3.0ch01	13925855	13927855	-	3733	3879	4349	3670	49.041	54.234	5.19271	1.30176e-10	-0.109072	2.59064	0.834684	1
Solyc01g014510	SL3.0ch01	13947910	13949910	+	1518	8270	1682	7768	15.509	17.799	2.29016	1.66154e-05	0	-3.91086	1	1
Solyc01g014520	SL3.0ch01	13958600	13960600	+	1240	3626	1183	3090	25.483	27.685	2.20252	0.00935513	0	-3.57627	1	1
Solyc01g014530	SL3.0ch01	13963682	13965682	-	1894	5956	1676	4497	24.127	27.15	3.02311	3.78502e-05	2.24187	-1.72713	0.227505	1
Solyc01g014534	SL3.0ch01	14018917	14020917	+	1137	13123	940	9353	7.973	9.132	1.15907	0.000855033	0	-3.70051	1	1
Solyc01g014537	SL3.0ch01	14096399	14098399	+	445	2689	475	1769	14.199	21.168	6.96845	5.26346e-11	0	-3.91086	1	1
Solyc01g150000	SL3.0ch01	14177441	14179441	+	962	6584	836	4638	12.748	15.272	2.52372	3.333e-05	0	-3.91086	1	1
Solyc01g150007	SL3.0ch01	14259212	14261212	+	4856	4317	3821	2962	52.938	56.332	3.39404	1.78316e-05	0	-3.91086	1	1
Solyc01g014540	SL3.0ch01	14259949	14261949	+	5277	5848	4015	3537	47.434	53.165	5.73102	3.37663e-14	0	-3.91086	1	1
Solyc01g014560	SL3.0ch01	14271435	14273435	-	7470	7525	6876	5882	49.817	53.896	4.07899	2.01797e-11	-0.220446	3.26495	0.850273	1
Solyc01g014561	SL3.0ch01	14317592	14319592	+	936	8655	936	7354	9.759	11.291	1.53156	0.000567835	0	-3.91086	1	1
Solyc01g014562	SL3.0ch01	14321656	14323656	+	248	2108	335	2171	10.526	13.368	2.8416	0.00142163	0	-3.91086	1	1
Solyc01g014564	SL3.0ch01	14356992	14358992	+	844	8786	861	6723	8.764	11.353	2.58857	2.36743e-08	0	-3.91086	1	1
Solyc01g014568	SL3.0ch01	14369494	14371494	+	656	9172	577	6373	6.675	8.302	1.62735	6.23216e-05	0	-3.91086	1	1
Solyc01g014620	SL3.0ch01	14375008	14377008	-	4542	9060	4978	8247	33.392	37.641	4.24868	7.116e-13	0	-3.56808	1	1
Solyc01g014640	SL3.0ch01	14406438	14408438	+	1071	5431	1431	6412	16.472	18.246	1.77371	0.00312025	0	-3.91086	1	1
Solyc01g014643	SL3.0ch01	14406828	14408828	+	1092	5122	1442	6158	17.573	18.974	1.40046	0.0180057	0	-3.91086	1	1
Solyc01g014660	SL3.0ch01	14416763	14418763	-	1770	8752	1938	7614	16.822	20.289	3.46705	4.07559e-10	0	-3.74195	1	1
Solyc01g014680	SL3.0ch01	14455342	14457342	+	3349	6339	3151	5613	34.569	35.954	1.38536	0.0244991	0	-3.79435	1	1
Solyc01g014700	SL3.0ch01	14459666	14461666	-	8870	8074	8358	7047	52.349	54.255	1.9062	0.000412917	1.45801	-0.447603	0.298351	1
Solyc01g014705	SL3.0ch01	14488262	14490262	+	178	1856	123	1038	8.751	10.594	1.84309	0.041486	0	-3.91086	1	1
Solyc01g014710	SL3.0ch01	14495475	14497475	+	677	3284	1105	4264	17.092	20.581	3.48947	1.83045e-05	0.567339	-0.272321	0.399643	1
Solyc01g014715	SL3.0ch01	14521163	14523163	+	648	8157	781	7072	7.359	9.945	2.58579	3.6359e-09	0	-3.91086	1	1
Solyc01g014730	SL3.0ch01	14717876	14719876	-	1866	3417	2723	2599	35.321	51.165	15.8441	1.39465e-59	0	-3.87049	1	1
Solyc01g014740	SL3.0ch01	14727641	14729641	+	1682	8750	1762	7817	16.123	18.394	2.27094	1.83599e-05	-0.636492	-2.81024	0.739682	1
Solyc01g014760	SL3.0ch01	14939495	14941495	-	365	3684	432	3271	9.015	11.666	2.65165	9.76544e-05	0	-3.91086	1	1
Solyc01g014770	SL3.0ch01	14972835	14974835	+	722	6864	1036	8062	9.518	11.387	1.86959	7.18308e-05	0	-3.91086	1	1
Solyc01g014780	SL3.0ch01	15013791	15015791	-	148	1009	407	2018	12.792	16.784	3.9918	0.00116555	0	-3.91086	1	1
Solyc01g014790	SL3.0ch01	15047018	15049018	-	460	2098	756	2929	17.983	20.516	2.5328	0.00734605	0	-3.91086	1	1
Solyc01g014800	SL3.0ch01	15050582	15052582	-	565	2440	1028	3690	18.802	21.789	2.9869	0.00104722	0	-3.91086	1	1
Solyc01g014830	SL3.0ch01	15503442	15505442	-	641	2594	731	2452	19.815	22.966	3.15123	0.00130578	0	-3.91086	1	1
Solyc01g014840	SL3.0ch01	15510115	15512115	-	5315	6307	6863	6458	45.732	51.52	5.78792	2.58878e-19	1.41511	2.97353	0.0862198	1
Solyc01g014860	SL3.0ch01	15523898	15525898	-	4221	9629	3838	7736	30.477	33.161	2.684	4.21007e-06	0.361954	1.53387	0.450228	1
Solyc01g014910	SL3.0ch01	15743030	15745030	+	783	6781	915	6388	10.352	12.529	2.17743	2.59329e-05	0	-3.91086	1	1
Solyc01g014920	SL3.0ch01	15907511	15909511	-	839	8466	1170	8199	9.017	12.488	3.47133	3.80225e-14	0	-3.91086	1	1
Solyc01g014940	SL3.0ch01	15955704	15957704	-	18	916	44	1278	1.927	3.328	1.4011	0.0243751	0	-3.91086	1	1
Solyc01g014960	SL3.0ch01	16130252	16132252	+	654	9845	617	7470	6.229	7.63	1.40036	0.000141013	0	-3.91086	1	1
Solyc01g014990	SL3.0ch01	16487988	16489988	-	738	6830	785	6224	9.752	11.2	1.4483	0.00261338	0	-3.91086	1	1
Solyc01g015000	SL3.0ch01	16517350	16519350	+	1725	8613	2207	6376	16.686	25.714	9.02761	9.63639e-51	-1.39385	-2.37536	0.26144	1
Solyc01g015010	SL3.0ch01	16522203	16524203	+	1189	4314	1234	3938	21.606	23.859	2.25285	0.003218	0	-3.91086	1	1
Solyc01g015020	SL3.0ch01	16534415	16536415	+	5656	9042	5956	8717	38.481	40.592	2.11014	0.000161599	0.240435	6.25397	0.425197	1
Solyc01g015030	SL3.0ch01	16601492	16603492	-	591	10455	615	9243	5.35	6.239	0.888235	0.00360039	0	-3.91086	1	1
Solyc01g015040	SL3.0ch01	16656489	16658489	+	855	6075	867	5169	12.338	14.364	2.02615	0.00049251	0	-3.91086	1	1
Solyc01g015050	SL3.0ch01	16660683	16662683	+	1397	5745	1288	4681	19.56	21.578	2.01781	0.00260825	0	-3.91086	1	1
Solyc01g015070	SL3.0ch01	16667523	16669523	+	1212	6204	1150	4937	16.343	18.893	2.54968	8.10756e-05	0	-3.91086	1	1
Solyc01g015080	SL3.0ch01	16715127	16717127	-	1603	3294	1421	2321	32.734	37.974	5.24002	4.80869e-07	0	-3.91086	1	1
Solyc01g015085	SL3.0ch01	16741535	16743535	+	4442	7744	4100	6625	36.452	38.228	1.77677	0.00329524	0	-3.91086	1	1
Solyc01g015130	SL3.0ch01	16763557	16765557	-	1184	6773	914	4302	14.88	17.523	2.64303	4.50983e-05	0	-3.91086	1	1
Solyc01g015140	SL3.0ch01	16877128	16879128	-	731	5362	646	4297	11.997	13.069	1.07161	0.0430226	0	-3.91086	1	1
Solyc01g015170	SL3.0ch01	17320419	17322419	-	688	7494	684	6129	8.409	10.04	1.63093	0.000389072	0	-3.91086	1	1
Solyc01g015180	SL3.0ch01	17385760	17387760	-	762	5436	729	4666	12.294	13.513	1.21822	0.0251889	0	-3.91086	1	1
Solyc01g015250	SL3.0ch01	18153661	18155661	-	1163	8609	1249	7066	11.901	15.021	3.1197	1.19049e-09	1.90136	-3.87171	1	1
Solyc01g015280	SL3.0ch01	18298120	18300120	+	629	6394	565	4789	8.956	10.553	1.59657	0.00191397	0	-3.91086	1	1
Solyc01g015290	SL3.0ch01	18336641	18338641	+	356	5892	731	6624	5.698	9.939	4.24099	1.41848e-19	0	-3.91086	1	1
Solyc01g015285	SL3.0ch01	18449626	18451626	-	939	5604	858	4394	14.351	16.337	1.98542	0.00183452	0	-3.91086	1	1
Solyc01g016300	SL3.0ch01	18622146	18624146	-	495	3046	696	2882	13.979	19.452	5.47311	9.1438e-10	0	-3.91086	1	1
Solyc01g016350	SL3.0ch01	18965419	18967419	+	843	3651	1098	3844	18.758	22.218	3.45938	2.84014e-05	0	-3.91086	1	1
Solyc01g016380	SL3.0ch01	19403384	19405384	-	1122	5925	952	4550	15.922	17.303	1.38113	0.0197464	0	-3.91086	1	1
Solyc01g016390	SL3.0ch01	19405851	19407851	-	4808	11155	4289	7721	30.12	35.712	5.59226	2.87057e-22	0	-3.91086	1	1
Solyc01g016410	SL3.0ch01	19418172	19420172	-	6303	7485	7391	7163	45.714	50.783	5.06963	4.14834e-17	0.327782	4.66337	0.326454	1
Solyc01g016413	SL3.0ch01	19553248	19555248	+	1236	6482	1105	4984	16.015	18.147	2.13297	0.000652688	1.78814	-3.87428	1	1
Solyc01g016430	SL3.0ch01	19653787	19655787	+	625	4906	867	5892	11.3	12.827	1.5274	0.00547465	1.79968	-3.61577	1	1
Solyc01g016435	SL3.0ch01	19665105	19667105	-	1289	7943	1214	6455	13.962	15.83	1.86766	0.000460012	0	-3.91086	1	1
Solyc01g016455	SL3.0ch01	19933831	19935831	-	656	2854	648	2355	18.689	21.578	2.88896	0.00230083	-4.74253	2.55628	4.6921e-09	3.22744e-06
Solyc01g016460	SL3.0ch01	19931727	19933727	-	63	2186	1494	6496	2.801	18.698	15.8971	1.25659e-98	-5.21158	-0.617724	9.49905e-08	5.22711e-05
Solyc01g016470	SL3.0ch01	20053774	20055774	-	4193	8752	4361	6909	32.391	38.696	6.30477	7.03861e-24	0.104342	5.78609	0.77041	1
Solyc01g016475	SL3.0ch01	20099939	20101939	+	923	11321	1038	9727	7.538	9.642	2.10397	1.55541e-08	0	-3.91086	1	1
Solyc01g016540	SL3.0ch01	20365492	20367492	+	2451	10740	2606	8542	18.581	23.376	4.79554	1.61352e-19	0	-3.91086	1	1
Solyc01g016520	SL3.0ch01	20370859	20372859	-	609	4296	461	2466	12.416	15.75	3.33401	3.01576e-05	0	-3.76263	1	1
Solyc01g016580	SL3.0ch01	20498873	20500873	+	1792	8788	1676	7328	16.938	18.614	1.67633	0.00144409	0	-3.91086	1	1
Solyc01g016590	SL3.0ch01	20524015	20526015	-	1368	6029	1131	4601	18.494	19.731	1.23735	0.0361095	0	-3.91086	1	1
Solyc01g016610	SL3.0ch01	20647551	20649551	+	605	3991	718	3188	13.164	18.382	5.21836	6.87938e-11	0	-3.91086	1	1
Solyc01g016630	SL3.0ch01	20717568	20719568	+	1002	10882	784	7596	8.432	9.356	0.924104	0.0122529	0	-3.91086	1	1
Solyc01g016633	SL3.0ch01	20751233	20753233	-	288	1581	756	3065	15.409	19.785	4.37609	4.57481e-05	0	-3.91086	1	1
Solyc01g016640	SL3.0ch01	20780575	20782575	-	627	3524	505	2500	15.105	16.805	1.70053	0.0257554	0	-3.91086	1	1
Solyc01g016645	SL3.0ch01	20781111	20783111	-	760	4211	635	2931	15.289	17.807	2.51839	0.00125744	0	-3.91086	1	1
Solyc01g016650	SL3.0ch01	20857209	20859209	-	760	7909	920	6676	8.767	12.112	3.34477	4.95563e-12	0	-3.91086	1	1
Solyc01g016660	SL3.0ch01	20895446	20897446	+	1003	5446	1094	4851	15.553	18.402	2.84922	1.96531e-05	0	-3.91086	1	1
Solyc01g016670	SL3.0ch01	20932319	20934319	-	1243	7869	989	5810	13.641	14.546	0.904905	0.0485481	0	-3.91086	1	1
Solyc01g016680	SL3.0ch01	21180565	21182565	+	478	2735	572	2617	14.877	17.937	3.0596	0.000683907	0	-3.91086	1	1
Solyc01g016697	SL3.0ch01	21330141	21332141	-	522	1552	515	993	25.169	34.151	8.98244	6.96551e-09	0	-3.91086	1	1
Solyc01g016700	SL3.0ch01	21323192	21325192	-	628	1999	567	1543	23.906	26.872	2.96644	0.0106569	0	-3.78859	1	1
Solyc01g016720	SL3.0ch01	21668327	21670327	-	644	5781	777	5396	10.023	12.587	2.56373	4.94365e-06	5.88683	-3.11431	0.0104051	0.485901
Solyc01g016730	SL3.0ch01	21840544	21842544	-	1625	7535	1480	5971	17.74	19.863	2.12293	0.000339028	0	-3.91086	1	1
Solyc01g016750	SL3.0ch01	21887084	21889084	-	1397	5894	1240	4713	19.161	20.83	1.66922	0.00914216	0	-3.91086	1	1
Solyc01g016770	SL3.0ch01	21976695	21978695	+	1340	6254	2107	5357	17.646	28.229	10.5833	1.11864e-52	1.94439	-3.87079	1	1
Solyc01g016780	SL3.0ch01	21976998	21978998	+	974	5221	1833	4634	15.722	28.344	12.6215	1.31235e-64	0	-3.91086	1	1
Solyc01g016800	SL3.0ch01	22153123	22155123	-	1329	5567	1123	4329	19.272	20.598	1.3259	0.0329165	-3.03485	-3.80323	0.522497	1
Solyc01g016850	SL3.0ch01	22483220	22485220	-	279	3907	331	3431	6.665	8.799	2.13344	0.000268044	0	-3.91086	1	1
Solyc01g016880	SL3.0ch01	22610247	22612247	+	800	5833	913	5487	12.061	14.266	2.20472	0.000149118	0	-3.91086	1	1
Solyc01g016900	SL3.0ch01	22700036	22702036	+	1408	4933	1652	4339	22.205	27.575	5.37	9.44069e-12	0	-3.91086	1	1
Solyc01g016910	SL3.0ch01	22801939	22803939	+	1319	6842	1274	5469	16.162	18.894	2.73143	1.06773e-05	0	-3.91086	1	1
Solyc01g016940	SL3.0ch01	22900804	22902804	+	513	4857	700	5327	9.553	11.614	2.06133	0.000256238	0	-3.91086	1	1
Solyc01g016960	SL3.0ch01	23096455	23098455	-	868	4512	1149	4742	16.134	19.504	3.3705	2.95987e-06	0	-3.91086	1	1
Solyc01g016970	SL3.0ch01	23127325	23129325	+	5076	10392	4876	9527	32.816	33.854	1.03792	0.0282683	2.33195	1.1362	7.2251e-05	0.0150249
Solyc01g016980	SL3.0ch01	23287111	23289111	-	698	4049	925	4428	14.704	17.28	2.57601	0.000314973	0	-3.91086	1	1
Solyc01g016985	SL3.0ch01	23412280	23414280	+	770	4559	776	3752	14.449	17.138	2.68857	0.000191306	0	-3.91086	1	1
Solyc01g017020	SL3.0ch01	23424085	23426085	-	385	2633	571	2520	12.757	18.473	5.71619	1.09713e-09	0	-3.91086	1	1
Solyc01g017040	SL3.0ch01	23705739	23707739	-	1187	4722	1912	6162	20.088	23.681	3.59295	4.35964e-07	0	-3.91086	1	1
Solyc01g017060	SL3.0ch01	23788565	23790565	-	794	21369	879	13096	3.583	6.29	2.70726	6.17611e-31	0	-3.91086	1	1
Solyc01g017070	SL3.0ch01	23789286	23791286	-	1302	34507	1029	19955	3.636	4.904	1.26778	6.9994e-13	0	-3.91086	1	1
Solyc01g017083	SL3.0ch01	23789404	23791404	+	1271	33454	988	19204	3.66	4.893	1.23284	6.63383e-12	0	-3.91086	1	1
Solyc01g017100	SL3.0ch01	23793706	23795706	+	1743	93847	1611	73461	1.823	2.146	0.322527	1.92296e-06	-4.61555	-3.58185	0.236379	1
Solyc01g017110	SL3.0ch01	23794404	23796404	+	1567	81199	1521	63236	1.893	2.349	0.455491	2.08185e-09	0	-3.63278	1	1
Solyc01g017120	SL3.0ch01	23797034	23799034	+	915	9601	1266	8605	8.701	12.825	4.12442	6.52965e-21	0	-3.91086	1	1
Solyc01g017130	SL3.0ch01	23797396	23799396	+	972	8962	1407	8231	9.785	14.598	4.81389	3.20817e-24	0	-3.87249	1	1
Solyc01g017140	SL3.0ch01	23797946	23799946	+	2098	64513	2456	40929	3.15	5.661	2.51131	1.78879e-88	1.80403	-3.6634	1	1
Solyc01g017150	SL3.0ch01	23800697	23802697	+	857	7306	728	4593	10.499	13.682	3.18305	3.08902e-08	0	-3.91086	1	1
Solyc01g017160	SL3.0ch01	23803934	23805934	-	1681	50051	1722	30879	3.249	5.282	2.03261	9.64244e-46	0	-3.91086	1	1
Solyc01g017170	SL3.0ch01	23805191	23807191	-	1067	6228	1572	7338	14.626	17.643	3.01664	2.31814e-07	1.18361	-2.64802	0.493319	1
Solyc01g017180	SL3.0ch01	23805879	23807879	-	873	5591	1285	6169	13.506	17.239	3.7335	1.53302e-09	0	-3.91086	1	1
Solyc01g017190	SL3.0ch01	23806285	23808285	-	757	10210	1041	7375	6.903	12.369	5.46677	4.20725e-37	0	-3.91086	1	1
Solyc01g017183	SL3.0ch01	23806630	23808630	-	765	15662	990	10429	4.657	8.67	4.01279	7.57285e-40	-0.929644	-1.98926	0.494486	1
Solyc01g017185	SL3.0ch01	23807137	23809137	-	958	39544	913	26539	2.365	3.326	0.96049	1.93028e-13	0	-3.91086	1	1
Solyc01g017187	SL3.0ch01	23807619	23809619	-	1169	48030	1129	33368	2.376	3.273	0.896684	1.99295e-14	0	-3.69406	1	1
Solyc01g017200	SL3.0ch01	23805943	23807943	+	863	5573	1265	6126	13.409	17.115	3.70646	2.13474e-09	0	-3.23557	1	1
Solyc01g017210	SL3.0ch01	23809922	23811922	-	1581	71079	1477	47470	2.176	3.018	0.841662	2.70678e-19	0	-3.8312	1	1
Solyc01g017220	SL3.0ch01	23812705	23814705	-	5534	113473	4668	87834	4.65	5.046	0.396231	2.10767e-05	-1.21908	-0.0215383	0.0523551	1
Solyc01g017230	SL3.0ch01	23810933	23812933	+	2465	177651	2137	119148	1.369	1.762	0.393403	2.94205e-17	0	-3.91086	1	1
Solyc01g017235	SL3.0ch01	23814152	23816152	-	1158	22784	1469	18083	4.837	7.513	2.67661	2.76679e-30	0	-3.91086	1	1
Solyc01g017240	SL3.0ch01	23814578	23816578	-	928	8316	1340	7042	10.039	15.987	5.94769	4.27575e-31	0	-3.91086	1	1
Solyc01g017245	SL3.0ch01	23814842	23816842	-	909	8266	1330	6947	9.907	16.069	6.16127	5.25609e-33	0	-3.91086	1	1
Solyc01g017250	SL3.0ch01	23815856	23817856	-	919	7421	1302	6017	11.019	17.789	6.77013	9.92923e-33	0	-3.91086	1	1
Solyc01g017260	SL3.0ch01	23815770	23817770	+	889	7167	1271	5862	11.035	17.819	6.78334	6.50877e-32	-1.81381	-3.83664	1	1
Solyc01g017270	SL3.0ch01	23819470	23821470	-	827	9055	795	5603	8.369	12.426	4.05701	1.72281e-16	0	-3.91086	1	1
Solyc01g017290	SL3.0ch01	23820696	23822696	-	835	7086	694	5170	10.542	11.835	1.29333	0.00909493	0	-3.91086	1	1
Solyc01g017300	SL3.0ch01	23851359	23853359	+	511	3040	420	2021	14.39	17.206	2.81575	0.00197913	-1.93215	-3.2533	0.448918	1
Solyc01g017330	SL3.0ch01	23851705	23853705	+	524	3027	582	2212	14.756	20.83	6.07394	4.76193e-10	3.89598	-3.72511	0.377719	1
Solyc01g017310	SL3.0ch01	23853119	23855119	+	887	15709	1156	11619	5.345	9.049	3.70426	8.79899e-34	0	-3.91086	1	1
Solyc01g017320	SL3.0ch01	23853532	23855532	+	1018	16975	1309	12431	5.658	9.527	3.86917	1.21422e-37	1.90137	-3.87171	1	1
Solyc01g017333	SL3.0ch01	23854293	23856293	+	1130	31237	1316	20632	3.491	5.996	2.50478	2.9907e-41	-1.93053	-3.83347	1	1
Solyc01g017337	SL3.0ch01	23857137	23859137	-	1646	77630	1617	53793	2.076	2.918	0.841955	4.80424e-22	2.53528	-3.63453	0.65113	1
Solyc01g017360	SL3.0ch01	23857490	23859490	+	1491	62992	1533	45085	2.312	3.288	0.976192	5.11799e-22	0	-3.91086	1	1
Solyc01g017370	SL3.0ch01	23858039	23860039	+	1742	82304	1813	60455	2.073	2.912	0.838933	6.57225e-24	-1.93645	-3.2165	1	1
Solyc01g017380	SL3.0ch01	23859648	23861648	+	1251	48976	1185	36456	2.491	3.148	0.657471	6.43247e-09	0	-3.79469	1	1
Solyc01g017390	SL3.0ch01	23860018	23862018	+	1162	37919	1124	26940	2.973	4.005	1.03182	9.75198e-13	0	-3.86962	1	1
Solyc01g017400	SL3.0ch01	23861079	23863079	+	1036	15190	1285	10570	6.385	10.839	4.45449	4.33516e-39	0.287018	0.22204	0.627214	1
Solyc01g017410	SL3.0ch01	23865798	23867798	-	1721	77921	1971	54612	2.161	3.483	1.32246	2.00638e-47	0	-3.91086	1	1
Solyc01g017420	SL3.0ch01	23864352	23866352	+	1858	23151	2180	17661	7.429	10.987	3.55802	1.15965e-37	0	-3.661	1	1
Solyc01g017460	SL3.0ch01	23864352	23866352	+	1858	23151	2180	17661	7.429	10.987	3.55802	1.15965e-37	-3.6627	-3.62037	0.39338	1
Solyc01g017430	SL3.0ch01	23866598	23868598	+	1339	73944	1537	51044	1.779	2.923	1.14449	5.02955e-40	0	-3.91086	1	1
Solyc01g017440	SL3.0ch01	23870256	23872256	-	1149	28096	1443	18634	3.929	7.187	3.25845	1.75518e-54	-2.25997	-2.85883	0.480046	1
Solyc01g017450	SL3.0ch01	23870776	23872776	-	1096	24329	1493	17278	4.311	7.954	3.64304	4.42185e-56	0	-3.72901	1	1
Solyc01g017470	SL3.0ch01	23869350	23871350	+	1598	43915	1728	30169	3.511	5.417	1.90635	3.20035e-36	1.90257	-3.61296	1	1
Solyc01g017480	SL3.0ch01	23872592	23874592	-	1525	15591	1016	8544	8.91	10.628	1.71782	4.7542e-06	0	-3.91086	1	1
Solyc01g017490	SL3.0ch01	23874323	23876323	-	831	3485	694	1947	19.254	26.278	7.02399	1.50847e-11	1.89891	-3.78842	1	1
Solyc01g017485	SL3.0ch01	23880162	23882162	-	879	7568	795	5097	10.406	13.493	3.08681	2.35046e-08	0	-3.91086	1	1
Solyc01g017500	SL3.0ch01	23875211	23877211	+	949	4137	723	2240	18.659	24.401	5.74188	1.64416e-09	0	-3.79401	1	1
Solyc01g017510	SL3.0ch01	23878625	23880625	+	753	11571	875	6869	6.11	11.299	5.18904	5.62576e-37	0	-3.87049	1	1
Solyc01g017560	SL3.0ch01	24023560	24025560	+	1872	5793	2280	5377	24.423	29.777	5.35397	1.78833e-13	-1.88826	-3.72476	0.677343	1
Solyc01g017563	SL3.0ch01	24034632	24036632	-	1514	6222	1278	4830	19.571	20.923	1.35254	0.0243751	0	-3.91086	1	1
Solyc01g017567	SL3.0ch01	24046204	24048204	+	829	9276	975	7235	8.204	11.876	3.6719	4.12018e-16	0	-3.50434	1	1
Solyc01g017570	SL3.0ch01	24046321	24048321	+	756	8831	860	6792	7.886	11.239	3.35321	1.74084e-13	0	-3.83515	1	1
Solyc01g017600	SL3.0ch01	24249508	24251508	-	626	8286	932	8220	7.024	10.184	3.15933	7.58165e-14	4.6697	-1.78734	0.0429705	0.950623
Solyc01g017610	SL3.0ch01	24346698	24348698	+	5274	9991	5071	8135	34.55	38.399	3.84959	2.84756e-11	0	-3.91086	1	1
Solyc01g017620	SL3.0ch01	24362071	24364071	-	1094	6868	1112	6218	13.74	15.171	1.43027	0.00661054	0	-3.91086	1	1
Solyc01g017640	SL3.0ch01	24559070	24561070	+	869	6199	1083	6673	12.295	13.963	1.66853	0.00169293	0	-3.91086	1	1
Solyc01g017660	SL3.0ch01	24631255	24633255	+	357	2938	383	2639	10.835	12.674	1.83913	0.0132181	0	-3.91086	1	1
Solyc01g017670	SL3.0ch01	24644451	24646451	-	601	5467	669	5222	9.904	11.356	1.45189	0.00589591	0	-3.91086	1	1
Solyc01g017680	SL3.0ch01	24701309	24703309	-	439	4173	781	4671	9.519	14.325	4.80637	2.56476e-13	0	-3.91086	1	1
Solyc01g017720	SL3.0ch01	24827942	24829942	+	985	7855	1156	7090	11.143	14.019	2.87638	1.69288e-08	-0.111911	-1.79897	1	1
Solyc01g017730	SL3.0ch01	24846709	24848709	-	666	3596	926	3451	15.626	21.156	5.52958	5.71114e-11	0.0181972	-3.09097	1	1
Solyc01g017760	SL3.0ch01	25265339	25267339	+	979	6244	1054	5572	13.554	15.907	2.35311	7.37155e-05	1.78814	-3.87428	1	1
Solyc01g017770	SL3.0ch01	25271861	25273861	+	124	1594	292	2963	7.218	8.971	1.75312	0.0179269	0	-3.91086	1	1
Solyc01g017790	SL3.0ch01	25343761	25345761	-	654	3631	788	3348	15.263	19.052	3.78968	3.69441e-06	0	-3.91086	1	1
Solyc01g017793	SL3.0ch01	25444554	25446554	+	345	5435	554	6208	5.969	8.193	2.22398	1.27194e-06	0	-3.91086	1	1
Solyc01g017797	SL3.0ch01	25461329	25463329	+	554	5402	757	6417	9.302	10.552	1.25045	0.00949818	0	-3.91086	1	1
Solyc01g017820	SL3.0ch01	25465407	25467407	+	575	4638	766	4311	11.03	15.088	4.05753	1.3953e-09	0	-3.91086	1	1
Solyc01g017823	SL3.0ch01	25528171	25530171	-	285	2076	346	2129	12.071	13.98	1.90864	0.0243026	0	-3.87283	1	1
Solyc01g017827	SL3.0ch01	25672030	25674030	+	1683	5958	1601	4676	22.026	25.506	3.4799	1.51812e-06	0	-3.91086	1	1
Solyc01g017850	SL3.0ch01	25678136	25680136	+	1048	4000	1636	4951	20.761	24.837	4.0761	2.33912e-07	0	-3.91086	1	1
Solyc01g017870	SL3.0ch01	25742308	25744308	-	774	4437	946	4969	14.853	15.993	1.14004	0.045068	-0.372155	-2.76573	0.904499	1
Solyc01g017970	SL3.0ch01	26504175	26506175	+	1128	5004	1618	5258	18.395	23.531	5.13582	1.33728e-12	0	-3.91086	1	1
Solyc01g018020	SL3.0ch01	26749511	26751511	+	1715	5046	1810	4218	25.366	30.027	4.66047	5.42731e-09	-0.649098	-1.8584	0.690448	1
Solyc01g018025	SL3.0ch01	26774919	26776919	-	790	2346	861	1964	25.191	30.478	5.28655	5.28166e-06	0	-3.91086	1	1
Solyc01g018040	SL3.0ch01	26775779	26777779	+	1521	4217	1528	3751	26.507	28.945	2.43738	0.00269601	0	-3.91086	1	1
Solyc01g018060	SL3.0ch01	27233643	27235643	-	1166	8708	1028	6415	11.809	13.812	2.00284	7.19367e-05	0	-3.86689	1	1
Solyc01g018090	SL3.0ch01	27320445	27322445	+	924	8553	1027	6940	9.75	12.891	3.14075	1.0513e-10	0	-3.83451	1	1
Solyc01g019100	SL3.0ch01	27469556	27471556	-	562	6574	600	4881	7.876	10.947	3.07135	5.11495e-09	0	-3.91086	1	1
Solyc01g020100	SL3.0ch01	27646713	27648713	+	1262	3980	1111	3241	24.075	25.528	1.45371	0.0464051	0	-3.91086	1	1
Solyc01g020120	SL3.0ch01	27713902	27715902	+	1041	8324	990	6862	11.116	12.608	1.4924	0.00158472	-0.292467	-3.62034	1	1
Solyc01g020130	SL3.0ch01	27719500	27721500	+	1063	3472	1142	2901	23.44	28.246	4.80644	3.87135e-07	-0.1507	-0.866684	0.886705	1
Solyc01g020125	SL3.0ch01	27720339	27722339	+	436	1931	343	973	18.42	26.064	7.64389	9.06107e-08	-0.602382	-1.95811	0.555023	1
Solyc01g020155	SL3.0ch01	27726459	27728459	+	546	3869	704	3893	12.367	15.314	2.9474	4.36261e-05	-0.113423	-2.95306	1	1
Solyc01g020160	SL3.0ch01	27726828	27728828	+	705	5260	807	4755	11.819	14.509	2.69023	1.70734e-05	0	-3.87049	1	1
Solyc01g020170	SL3.0ch01	27751035	27753035	+	2054	9123	2124	8589	18.377	19.826	1.44935	0.00376441	0	-3.91086	1	1
Solyc01g020180	SL3.0ch01	27763526	27765526	+	1496	5302	1700	5175	22.006	24.727	2.7208	0.000124213	0	-3.91086	1	1
Solyc01g020190	SL3.0ch01	27775523	27777523	+	579	7457	698	7308	7.205	8.718	1.51338	0.000285031	1.35052	-0.370106	0.0766652	1
Solyc01g020200	SL3.0ch01	27787943	27789943	+	1873	41940	2092	31586	4.275	6.212	1.93678	1.6917e-32	0	-3.65206	1	1
Solyc01g020220	SL3.0ch01	27847588	27849588	+	5602	8514	5701	6940	39.685	45.099	5.41382	1.24862e-18	0.636891	-1.86979	0.522456	1
Solyc01g020230	SL3.0ch01	27847886	27849886	+	5620	8732	5707	7111	39.158	44.523	5.36502	1.14697e-18	0.916153	-0.974255	0.425693	1
Solyc01g020240	SL3.0ch01	27877980	27879980	+	5497	8335	6309	7261	39.741	46.492	6.75108	1.2101e-28	-0.223158	5.00533	0.423633	1
Solyc01g020280	SL3.0ch01	28539655	28541655	+	1471	11410	1567	9901	11.42	13.664	2.24419	1.46002e-07	0	-3.91086	1	1
Solyc01g020290	SL3.0ch01	28846840	28848840	+	1350	8215	1293	6987	14.114	15.616	1.50198	0.00289542	0	-3.91086	1	1
Solyc01g020300	SL3.0ch01	28914610	28916610	+	376	4045	603	3748	8.505	13.859	5.35402	3.78198e-15	0	-3.87283	1	1
Solyc01g020320	SL3.0ch01	29192745	29194745	-	5942	6312	6455	6465	48.49	49.961	1.47101	0.0103738	0.805029	3.02249	0.0648448	1
Solyc01g020371	SL3.0ch01	29355809	29357809	+	2897	10540	2436	7962	21.56	23.428	1.86771	0.000425309	-4.39944	-3.51384	0.11799	1
Solyc01g020374	SL3.0ch01	29463265	29465265	-	538	3820	701	3832	12.345	15.464	3.11926	1.89208e-05	0	-3.91086	1	1
Solyc01g020376	SL3.0ch01	29558526	29560526	-	1565	10146	1523	9262	13.364	14.121	0.757961	0.0456596	0	-3.91086	1	1
Solyc01g020406	SL3.0ch01	30334409	30336409	+	762	5512	1112	5997	12.145	15.642	3.49678	7.16126e-09	0	-3.91086	1	1
Solyc01g020430	SL3.0ch01	30369037	30371037	+	130	3304	111	2229	3.786	4.744	0.957917	0.0380917	0	-3.91086	1	1
Solyc01g020440	SL3.0ch01	30774214	30776214	-	2634	7478	2681	6519	26.048	29.141	3.09304	1.54941e-06	-0.0809199	4.96768	0.818019	1
Solyc01g020445	SL3.0ch01	30776527	30778527	+	1672	5648	1951	4719	22.842	29.25	6.40884	1.83643e-17	0	-3.91086	1	1
Solyc01g020450	SL3.0ch01	30831429	30833429	-	1009	4826	1081	3722	17.292	22.507	5.21456	3.26824e-11	0	-3.91086	1	1
Solyc01g020460	SL3.0ch01	30835288	30837288	-	1971	7272	1866	6474	21.324	22.374	1.04986	0.0428663	0	-3.91086	1	1
Solyc01g020480	SL3.0ch01	30904802	30906802	+	1610	9309	1599	7799	14.745	17.014	2.26932	9.13596e-06	0	-3.91086	1	1
Solyc01g020500	SL3.0ch01	30954014	30956014	+	662	5593	747	4897	10.584	13.235	2.65176	6.91685e-06	0.0936205	0.963626	0.850607	1
Solyc01g020510	SL3.0ch01	31023653	31025653	-	1641	10455	1623	7791	13.566	17.24	3.67381	2.31521e-13	0	-3.91086	1	1
Solyc01g020520	SL3.0ch01	31042626	31044626	+	2949	6463	2875	5556	31.332	34.1	2.768	6.3336e-05	-2.76116	-3.83217	0.673132	1
Solyc01g020525	SL3.0ch01	31042626	31044626	+	2949	6463	2875	5556	31.332	34.1	2.768	6.3336e-05	-0.00946835	1.99668	0.990011	1
Solyc01g020570	SL3.0ch01	31665826	31667826	-	605	4283	618	3086	12.377	16.685	4.30741	2.22805e-08	1.79658	-3.83726	1	1
Solyc01g021610	SL3.0ch01	32000533	32002533	-	1338	6887	1663	7293	16.267	18.569	2.30108	5.63585e-05	0	-3.91086	1	1
Solyc01g021620	SL3.0ch01	32038714	32040714	+	5811	8127	5646	6541	41.692	46.328	4.63628	1.08611e-13	0	-3.91086	1	1
Solyc01g021640	SL3.0ch01	32380796	32382796	+	2399	4334	1869	3144	35.63	37.283	1.65259	0.032535	0.344995	4.09542	0.252439	1
Solyc01g021670	SL3.0ch01	32431633	32433633	+	3192	7247	3193	6408	30.578	33.257	2.67931	3.94277e-05	0.294063	5.97009	0.289788	1
Solyc01g021675	SL3.0ch01	32440879	32442879	+	1181	5065	1278	4913	18.908	20.643	1.73477	0.00857639	0.158331	5.34877	0.625993	1
Solyc01g021700	SL3.0ch01	32513522	32515522	+	961	5105	1309	5612	15.842	18.913	3.07105	3.97626e-06	0	-3.91086	1	1
Solyc01g021730	SL3.0ch01	32669884	32671884	-	2920	10106	3483	8742	22.417	28.491	6.07409	1.02686e-27	1.17376	3.62844	0.01804	0.648498
Solyc01g022740	SL3.0ch01	32752774	32754774	-	4759	6739	5186	6262	41.39	45.3	3.91068	3.05167e-09	0.0130958	2.71506	0.977226	1
Solyc01g022750	SL3.0ch01	32846171	32848171	-	1128	3472	1728	3962	24.522	30.369	5.84733	6.25569e-11	-0.165158	5.92716	0.652785	1
Solyc01g022760	SL3.0ch01	32847802	32849802	-	18658	43208	22580	46397	30.159	32.736	2.57682	5.84539e-23	0	-3.91086	1	1
Solyc01g022780	SL3.0ch01	32866181	32868181	+	1343	3725	1636	3698	26.5	30.671	4.17156	2.51179e-06	0.787169	-3.68751	1	1
Solyc01g034010	SL3.0ch01	35329743	35331743	-	1216	6270	1175	5340	16.244	18.035	1.79165	0.0030533	1.78815	-3.87428	1	1
Solyc01g034020	SL3.0ch01	35378752	35380752	-	3897	7599	3625	6383	33.899	36.221	2.32228	0.000261964	0.0799369	6.56074	0.774613	1
Solyc01g034023	SL3.0ch01	35589799	35591799	+	301	1686	558	2232	15.148	20	4.85153	1.28199e-05	0	-3.91086	1	1
Solyc01g034050	SL3.0ch01	35597311	35599311	-	1037	4354	1283	4965	19.236	20.535	1.29881	0.0379843	-2.55022	-3.83813	0.668845	1
Solyc01g034070	SL3.0ch01	35750090	35752090	+	970	9649	1031	8291	9.135	11.06	1.92529	6.12131e-06	0	-3.91086	1	1
Solyc01g034063	SL3.0ch01	35750149	35752149	+	954	9350	1014	7950	9.259	11.312	2.05337	2.63781e-06	0	-3.91086	1	1
Solyc01g034080	SL3.0ch01	35862228	35864228	+	4289	6573	4155	5187	39.486	44.477	4.99028	1.38721e-12	-2.55946	-2.35015	0.0640792	1
Solyc01g034085	SL3.0ch01	36122752	36124752	-	1189	4474	1455	4643	20.996	23.86	2.86434	0.000146729	0	-3.91086	1	1
Solyc01g034140	SL3.0ch01	36197144	36199144	-	994	5504	804	3886	15.297	17.143	1.84584	0.00508175	0	-3.91086	1	1
Solyc01g034155	SL3.0ch01	36292983	36294983	-	1887	10410	2445	9497	15.345	20.474	5.12875	1.00662e-24	0.388213	0.968554	0.539544	1
Solyc01g034170	SL3.0ch01	36431512	36433512	-	4513	6756	4518	5695	40.048	44.238	4.18982	7.66572e-10	0	-3.91086	1	1
Solyc01g034210	SL3.0ch01	36636436	36638436	-	550	2658	977	3804	17.145	20.435	3.29042	0.00017984	0	-3.91086	1	1
Solyc01g035220	SL3.0ch01	36787828	36789828	+	707	7596	668	6179	8.515	9.756	1.2411	0.0046388	0	-3.91086	1	1
Solyc01g038230	SL3.0ch01	37083214	37085214	+	367	972	40	52	27.409	43.478	16.0697	0.00108097	0	-3.91086	1	1
Solyc01g028980	SL3.0ch01	39013065	39015065	+	891	4416	1339	4334	16.789	23.603	6.81389	1.89247e-18	0	-3.91086	1	1
Solyc01g028987	SL3.0ch01	39618537	39620537	+	1082	6362	1223	5171	14.535	19.127	4.59211	9.92422e-13	0	-3.91086	1	1
Solyc01g028930	SL3.0ch01	39819332	39821332	-	1143	8399	894	5145	11.979	14.804	2.82515	4.33548e-07	0.0721218	5.16803	0.799346	1
Solyc01g028900	SL3.0ch01	40715764	40717764	+	5760	8509	5421	7313	40.367	42.571	2.20384	0.000176952	0.194432	7.43225	0.44903	1
Solyc01g028870	SL3.0ch01	40946144	40948144	-	3093	4358	2709	3365	41.511	44.6	3.08873	0.000224327	-0.330294	5.27985	0.227206	1
Solyc01g028840	SL3.0ch01	41101706	41103706	-	1325	3471	1450	3359	27.627	30.152	2.52461	0.00370755	0	-3.91086	1	1
Solyc01g028830	SL3.0ch01	41108723	41110723	+	9377	8604	9809	7432	52.149	56.893	4.74396	1.27133e-18	-0.0943514	5.63052	0.744244	1
Solyc01g028810	SL3.0ch01	41285356	41287356	+	7103	6591	7998	5574	51.869	58.93	7.06072	7.8532e-31	-0.132332	9.4565	0.664077	1
Solyc01g028800	SL3.0ch01	41387254	41389254	+	435	5078	816	4964	7.89	14.118	6.22721	1.41833e-25	0.0178097	1.41596	0.987358	1
Solyc01g044277	SL3.0ch01	43059802	43061802	-	511	4921	444	3367	9.407	11.65	2.24327	0.00035091	0	-3.91086	1	1
Solyc01g044300	SL3.0ch01	43066367	43068367	+	3455	7197	3472	6639	32.435	34.339	1.90362	0.00222206	0	-3.91086	1	1
Solyc01g044305	SL3.0ch01	43150897	43152897	-	1998	3564	2007	2581	35.922	43.745	7.82222	2.88899e-15	0	-3.91086	1	1
Solyc01g044340	SL3.0ch01	43153083	43155083	+	5222	8457	4702	6936	38.175	40.402	2.22683	0.000219679	-0.776154	-3.75964	1	1
Solyc01g044307	SL3.0ch01	43153227	43155227	+	5216	8666	4634	6814	37.574	40.479	2.90485	2.22989e-06	0.578095	2.21798	0.305997	1
Solyc01g044350	SL3.0ch01	43154499	43156499	+	1127	4615	834	3064	19.627	21.396	1.76828	0.0174485	0.724023	1.05375	0.200042	1
Solyc01g044360	SL3.0ch01	43194404	43196404	+	3924	11289	3979	10222	25.794	28.019	2.22542	1.4617e-05	0.295385	8.00545	0.301726	1
Solyc01g044372	SL3.0ch01	43240464	43242464	-	4968	6912	4610	5269	41.818	46.665	4.84646	1.45907e-12	0.879676	-0.473421	0.237319	1
Solyc01g044373	SL3.0ch01	43791758	43793758	-	1222	4469	1218	3497	21.473	25.832	4.35995	1.97906e-07	0	-3.58993	1	1
Solyc01g044374	SL3.0ch01	43792237	43794237	-	953	3564	1014	2996	21.098	25.287	4.18871	4.48417e-06	0	-3.91086	1	1
Solyc01g044490	SL3.0ch01	44022735	44024735	+	2637	6244	2909	5751	29.693	33.591	3.89862	3.45174e-08	0	-3.91086	1	1
Solyc01g044480	SL3.0ch01	44022735	44024735	+	2637	6244	2909	5751	29.693	33.591	3.89862	3.45174e-08	6.64798	-1.63033	0.00010142	0.0191936
Solyc01g044510	SL3.0ch01	44076938	44078938	-	1029	8150	1060	6801	11.21	13.484	2.27392	5.86369e-06	0	-3.91086	1	1
Solyc01g044540	SL3.0ch01	44229541	44231541	+	5199	4822	5414	4732	51.881	53.361	1.47988	0.0179247	-0.475871	-0.413808	0.515704	1
Solyc01g044543	SL3.0ch01	44389260	44391260	+	1162	4045	1285	3513	22.316	26.782	4.46588	2.39944e-07	0	-3.91086	1	1
Solyc01g044550	SL3.0ch01	44574908	44576908	+	1424	5427	1275	3749	20.785	25.378	4.5929	5.23868e-09	0	-3.91086	1	1
Solyc01g044560	SL3.0ch01	44584758	44586758	+	1565	4055	1722	4044	27.847	29.865	2.01775	0.00974644	0	-3.91086	1	1
Solyc01g044565	SL3.0ch01	44585999	44587999	+	859	4517	1154	4766	15.978	19.493	3.51482	1.03117e-06	-2.13727	-3.65733	0.454059	1
Solyc01g047580	SL3.0ch01	44777994	44779994	-	2309	10434	2190	8989	18.12	19.59	1.47055	0.0022154	0	-3.91086	1	1
Solyc01g047590	SL3.0ch01	44888424	44890424	-	3992	16329	4536	15127	19.645	23.069	3.42401	1.72341e-16	0.777306	-3.19005	0.849946	1
Solyc01g047593	SL3.0ch01	44890108	44892108	-	1782	10668	1578	7983	14.313	16.505	2.1913	6.92185e-06	-1.91136	-3.83511	1	1
Solyc01g048590	SL3.0ch01	44910788	44912788	+	983	4710	900	3580	17.267	20.089	2.82247	0.000202497	0.285508	0.31431	0.789565	1
Solyc01g049640	SL3.0ch01	45559933	45561933	+	1682	4896	1603	3549	25.57	31.114	5.54405	5.8078e-11	0	-3.91086	1	1
Solyc01g049650	SL3.0ch01	45562645	45564645	+	2820	3415	3145	3392	45.229	48.111	2.88221	0.000752343	0.10904	6.38813	0.697809	1
Solyc01g049660	SL3.0ch01	45735107	45737107	-	1072	6343	1386	6154	14.457	18.382	3.92478	1.43154e-10	0	-3.91086	1	1
Solyc01g049685	SL3.0ch01	45792778	45794778	-	1808	7440	2518	8300	19.55	23.276	3.72585	2.12805e-10	0	-3.82789	1	1
Solyc01g049690	SL3.0ch01	45793026	45795026	-	2154	8488	2802	8599	20.241	24.577	4.33624	2.81884e-14	0.194011	3.20886	0.607047	1
Solyc01g049720	SL3.0ch01	46034061	46036061	-	1485	7132	1158	5106	17.233	18.487	1.25321	0.0247373	0	-3.91086	1	1
Solyc01g049740	SL3.0ch01	46184034	46186034	-	1116	5075	1258	4313	18.026	22.581	4.55506	1.21685e-09	0	-3.91086	1	1
Solyc01g049743	SL3.0ch01	46270223	46272223	-	1191	8711	1351	7699	12.028	14.928	2.9003	6.83361e-09	0	-3.91086	1	1
Solyc01g049750	SL3.0ch01	46267424	46269424	+	1230	6814	1117	5199	15.291	17.685	2.39434	9.03011e-05	0	-3.91086	1	1
Solyc01g049745	SL3.0ch01	46267557	46269557	+	1234	6177	1149	4900	16.651	18.995	2.34395	0.000297464	0	-3.91086	1	1
Solyc01g049747	SL3.0ch01	46268063	46270063	+	1347	5101	1193	4177	20.89	22.216	1.32582	0.0389254	0	-3.91086	1	1
Solyc01g049760	SL3.0ch01	46268728	46270728	+	1100	4331	1221	4285	20.254	22.176	1.92171	0.00762573	0	-3.91086	1	1
Solyc01g049765	SL3.0ch01	46270317	46272317	+	1225	8835	1320	7725	12.177	14.594	2.41676	9.86177e-07	0	-3.91086	1	1
Solyc01g049770	SL3.0ch01	46288758	46290758	+	75	3812	90	3310	1.93	2.647	0.71755	0.0201652	-0.048544	1.7791	0.932279	1
Solyc01g049775	SL3.0ch01	46460325	46462325	-	522	7449	616	6666	6.549	8.459	1.91048	6.50841e-06	0	-3.91086	1	1
Solyc01g049790	SL3.0ch01	46460634	46462634	-	560	8499	654	7868	6.182	7.674	1.49256	8.05698e-05	0	-3.91086	1	1
Solyc01g049810	SL3.0ch01	46560189	46562189	+	2496	7645	2390	5775	24.613	29.271	4.65832	2.87513e-12	-0.324332	-0.407219	0.647027	1
Solyc01g049820	SL3.0ch01	46571924	46573924	-	164	684	401	1123	19.34	26.312	6.97271	9.60028e-05	-1.60952	-2.0279	0.302613	1
Solyc01g049895	SL3.0ch01	46780721	46782721	-	1378	4035	1569	3857	25.457	28.916	3.4591	4.17573e-05	0	-3.91086	1	1
Solyc01g049910	SL3.0ch01	47073063	47075063	-	4487	7430	4311	5823	37.652	42.54	4.88787	3.01851e-13	0.0966276	2.47958	0.83755	1
Solyc01g049912	SL3.0ch01	47060474	47062474	-	271	2336	241	1436	10.395	14.371	3.97581	8.24715e-05	1.29268	-1.94008	0.443285	1
Solyc01g049914	SL3.0ch01	47073063	47075063	-	4487	7430	4311	5823	37.652	42.54	4.88787	3.01851e-13	0	-3.91086	1	1
Solyc01g049920	SL3.0ch01	47262157	47264157	+	2294	9119	2122	6161	20.1	25.619	5.51885	2.37262e-19	-0.247153	0.0650672	0.826905	1
Solyc01g049975	SL3.0ch01	47691030	47693030	+	6445	6022	6580	5068	51.696	56.49	4.79391	1.72525e-13	0.403419	1.8142	0.446956	1
Solyc01g050010	SL3.0ch01	47692652	47694652	+	1900	3708	2030	2770	33.88	42.292	8.4115	3.87914e-18	0.0628102	3.0274	0.87556	1
Solyc01g050020	SL3.0ch01	47952218	47954218	+	525	5846	798	4775	8.24	14.319	6.07857	2.87744e-25	-3.98213	-3.70139	0.236684	1
Solyc01g050070	SL3.0ch01	48300595	48302595	-	3163	7088	2939	5799	30.856	33.635	2.77917	3.45321e-05	-0.0271019	3.33252	0.940235	1
Solyc01g055200	SL3.0ch01	51678423	51680423	-	736	8159	893	7742	8.274	10.342	2.06732	2.24564e-06	0	-3.91086	1	1
Solyc01g056200	SL3.0ch01	52411753	52413753	-	590	3224	1093	3976	15.469	21.562	6.09311	5.96693e-13	0	-3.91086	1	1
Solyc01g056220	SL3.0ch01	52555722	52557722	-	1892	7872	2080	6682	19.377	23.739	4.36157	1.02128e-12	0	-3.91086	1	1
Solyc01g056230	SL3.0ch01	52597915	52599915	-	1088	4579	1241	4327	19.199	22.288	3.0892	4.34744e-05	0	-3.91086	1	1
Solyc01g056240	SL3.0ch01	52610547	52612547	+	1122	8856	1329	7836	11.245	14.501	3.25608	2.89907e-11	0	-3.91086	1	1
Solyc01g056260	SL3.0ch01	52751132	52753132	-	2659	5123	3316	4886	34.169	40.429	6.26057	7.13693e-16	-2.75897	-1.88015	0.0479966	0.994919
Solyc01g056270	SL3.0ch01	52752386	52754386	-	4173	5188	4879	4550	44.579	51.745	7.16605	3.66538e-22	-1.37479	-1.81131	0.113515	1
Solyc01g056280	SL3.0ch01	52759274	52761274	-	1016	10234	1182	7302	9.031	13.932	4.901	3.30284e-26	0	-3.91086	1	1
Solyc01g056320	SL3.0ch01	53341107	53343107	+	1737	6616	2080	7297	20.795	22.182	1.38701	0.0132181	0.855714	-1.12148	0.307741	1
Solyc01g056340	SL3.0ch01	53583870	53585870	+	3430	7447	3353	6656	31.534	33.5	1.96542	0.00156338	0.0207653	3.81561	0.950929	1
Solyc01g056360	SL3.0ch01	53726213	53728213	+	744	5020	724	3875	12.908	15.743	2.83485	3.44367e-05	0	-3.91086	1	1
Solyc01g056370	SL3.0ch01	53873236	53875236	-	653	5672	853	5618	10.324	13.182	2.85778	5.67226e-07	0	-3.91086	1	1
Solyc01g056375	SL3.0ch01	53873195	53875195	-	631	5581	813	5537	10.158	12.803	2.64539	3.02743e-06	0	-3.91086	1	1
Solyc01g056380	SL3.0ch01	54068733	54070733	+	696	5215	890	4968	11.775	15.193	3.41824	6.19111e-08	0	-3.91086	1	1
Solyc01g056390	SL3.0ch01	54078030	54080030	+	1047	4488	999	3948	18.916	20.194	1.27807	0.0473144	0	-3.91086	1	1
Solyc01g056410	SL3.0ch01	54085683	54087683	+	579	2471	416	1291	18.984	24.37	5.38663	1.13663e-05	0	-3.91086	1	1
Solyc01g056420	SL3.0ch01	54106337	54108337	-	433	2727	791	4249	13.703	15.694	1.99191	0.00769318	0	-3.91086	1	1
Solyc01g056430	SL3.0ch01	54141193	54143193	+	1008	6966	1156	7394	12.641	13.52	0.879384	0.0445521	0	-3.91086	1	1
Solyc01g056440	SL3.0ch01	54149310	54151310	+	817	3640	1061	3381	18.331	23.886	5.55492	1.94235e-10	0	-3.91086	1	1
Solyc01g056455	SL3.0ch01	54290285	54292285	-	840	3032	1028	3267	21.694	23.935	2.24059	0.00876601	0	-3.91086	1	1
Solyc01g056460	SL3.0ch01	54300339	54302339	+	924	2668	885	1900	25.724	31.777	6.05355	1.25676e-07	0	-3.91086	1	1
Solyc01g056470	SL3.0ch01	54305231	54307231	+	610	3452	1129	4593	15.017	19.731	4.71363	1.96697e-09	1.78818	-3.87428	1	1
Solyc01g056480	SL3.0ch01	54395531	54397531	-	4590	7759	4334	6392	37.169	40.406	3.23749	4.90199e-07	0.693323	0.564825	0.279844	1
Solyc01g056485	SL3.0ch01	54496164	54498164	+	2007	8703	1945	7014	18.739	21.71	2.97052	2.47002e-07	-1.91431	-3.87151	1	1
Solyc01g056520	SL3.0ch01	54572457	54574457	-	3112	10597	3192	8589	22.7	27.094	4.39406	1.36826e-15	0.31905	5.27248	0.224207	1
Solyc01g056580	SL3.0ch01	54883560	54885560	+	3413	9206	3223	7821	27.047	29.183	2.13675	0.000192027	1.88181	-2.65052	0.0819952	1
Solyc01g056620	SL3.0ch01	54995541	54997541	+	3745	5757	5038	5986	39.413	45.7	6.28754	3.50061e-19	0.646111	1.18992	0.259436	1
Solyc01g056640	SL3.0ch01	55134034	55136034	+	569	4324	704	3214	11.629	17.968	6.33949	1.41105e-16	0	-3.91086	1	1
Solyc01g056650	SL3.0ch01	55344776	55346776	+	952	5242	1254	5617	15.37	18.251	2.88091	1.0186e-05	0	-3.91086	1	1
Solyc01g056690	SL3.0ch01	55929996	55931996	-	4263	7430	4973	7874	36.458	38.709	2.25172	0.000201324	-0.0286112	4.36998	0.922076	1
Solyc01g056720	SL3.0ch01	56283964	56285964	-	6450	10080	6749	7888	39.02	46.109	7.08921	1.43472e-35	0.0738072	4.2251	0.819841	1
Solyc01g056725	SL3.0ch01	56287682	56289682	-	812	3579	941	3207	18.492	22.686	4.19326	1.68213e-06	-0.167855	-0.840698	0.877763	1
Solyc01g056730	SL3.0ch01	56437897	56439897	+	2326	5968	2639	5467	28.044	32.556	4.51176	4.90281e-10	0.149172	0.397572	0.813231	1
Solyc01g056750	SL3.0ch01	56454340	56456340	+	770	4586	934	5108	14.376	15.458	1.08206	0.049456	1.37005	-2.78697	0.43387	1
Solyc01g056760	SL3.0ch01	56462246	56464246	+	450	4001	531	3569	10.11	12.951	2.84113	3.08788e-05	-2.95618	-2.73817	0.205303	1
Solyc01g056780	SL3.0ch01	56534091	56536091	+	1070	2523	1445	2588	29.78	35.829	6.04928	2.31194e-08	-0.396932	3.92494	0.279298	1
Solyc01g056790	SL3.0ch01	56536714	56538714	+	2319	4499	1759	2789	34.013	38.676	4.66343	3.97876e-07	-0.226384	0.438207	0.821134	1
Solyc01g056810	SL3.0ch01	56761982	56763982	-	4939	9811	4545	8161	33.485	35.771	2.28576	5.7384e-05	-0.128023	3.3289	0.725417	1
Solyc01g056830	SL3.0ch01	56762394	56764394	-	5305	8958	4886	7655	37.194	38.96	1.76607	0.0018452	0.474464	-2.43764	0.774649	1
Solyc01g056840	SL3.0ch01	56853487	56855487	+	893	3688	803	2527	19.494	24.114	4.62055	8.57537e-07	0	-3.91086	1	1
Solyc01g056870	SL3.0ch01	57345894	57347894	-	597	3525	605	2466	14.483	19.7	5.21716	7.06813e-09	0	-3.91086	1	1
Solyc01g056875	SL3.0ch01	57379524	57381524	-	1020	4715	1063	3575	17.786	22.919	5.13383	1.49662e-10	-3.99108	-3.70088	0.186714	1
Solyc01g056885	SL3.0ch01	57389304	57391304	-	1168	4524	1138	3980	20.52	22.235	1.71522	0.0155643	0	-3.91086	1	1
Solyc01g056887	SL3.0ch01	57391115	57393115	-	1044	3364	1204	3373	23.684	26.305	2.62123	0.00257506	0	-3.91086	1	1
Solyc01g056890	SL3.0ch01	57389083	57391083	+	1174	4882	1281	4471	19.386	22.271	2.88478	8.54593e-05	-1.37653	-3.40786	0.718823	1
Solyc01g056900	SL3.0ch01	57395445	57397445	+	958	3915	1209	3948	19.659	23.444	3.78452	3.93236e-06	2.70463	-3.83362	0.671745	1
Solyc01g056910	SL3.0ch01	57395771	57397771	+	947	3597	1258	3930	20.841	24.248	3.4076	4.75952e-05	1.81767	-3.55801	1	1
Solyc01g056930	SL3.0ch01	57484268	57486268	+	928	6232	1099	5755	12.961	16.034	3.07354	2.43543e-07	0	-3.91086	1	1
Solyc01g056940	SL3.0ch01	57594504	57596504	+	1333	2941	1230	2415	31.189	33.745	2.55627	0.00857217	-0.0339592	8.45293	0.925319	1
Solyc01g056950	SL3.0ch01	57635808	57637808	-	1156	7515	1005	5332	13.332	15.859	2.52744	1.22411e-05	0	-3.91086	1	1
Solyc01g056970	SL3.0ch01	57848317	57850317	-	2352	7350	2794	6812	24.242	29.086	4.84356	5.95187e-14	0	-3.91086	1	1
Solyc01g056990	SL3.0ch01	57858291	57860291	+	5923	7771	5732	6892	43.253	45.406	2.15306	0.000315333	-0.207518	0.11936	0.804997	1
Solyc01g057000	SL3.0ch01	57888469	57890469	+	7029	7829	6512	6430	47.308	50.317	3.00895	5.52462e-07	0.401814	9.64771	0.287787	1
Solyc01g057020	SL3.0ch01	57938980	57940980	+	5584	10207	5524	8879	35.362	38.353	2.99121	8.24577e-08	-0.0578364	2.68944	0.896912	1
Solyc01g057030	SL3.0ch01	57950214	57952214	-	1230	5607	1322	4942	17.99	21.105	3.11438	6.30001e-06	-2.99884	-2.71197	0.354116	1
Solyc01g057040	SL3.0ch01	57950179	57952179	+	1230	5607	1334	4929	17.99	21.3	3.30935	1.7737e-06	-0.474759	3.94012	0.128838	1
Solyc01g057060	SL3.0ch01	58086261	58088261	+	712	3599	833	3466	16.516	19.377	2.86071	0.000372275	0	-3.91086	1	1
Solyc01g057070	SL3.0ch01	58091619	58093619	+	1753	7339	1403	5208	19.281	21.222	1.94152	0.0017262	0	-3.91086	1	1
Solyc01g057080	SL3.0ch01	58284435	58286435	-	2523	8674	2770	7954	22.533	25.83	3.29709	1.42678e-08	0.0074754	-2.43168	1	1
Solyc01g057090	SL3.0ch01	58361564	58363564	-	5764	8759	6291	8203	39.689	43.404	3.7154	1.95859e-10	0.109521	4.99989	0.695706	1
Solyc01g057100	SL3.0ch01	58370192	58372192	-	1991	13007	1889	10103	13.275	15.752	2.47706	1.09799e-08	0	-3.91086	1	1
Solyc01g057140	SL3.0ch01	59294384	59296384	+	662	3331	840	3708	16.579	18.47	1.89064	0.0118471	0	-3.91086	1	1
Solyc01g057150	SL3.0ch01	59347713	59349713	-	652	6091	814	5449	9.669	12.997	3.32768	2.95307e-09	-4.87167	-3.47195	0.189015	1
Solyc01g057170	SL3.0ch01	59420332	59422332	+	6330	12092	5137	8491	34.361	37.694	3.33336	1.10042e-09	0.238913	-0.931163	0.803092	1
Solyc01g057175	SL3.0ch01	59422250	59424250	+	44	3508	88	3267	1.239	2.623	1.38421	2.41048e-05	0	-3.87342	1	1
Solyc01g057180	SL3.0ch01	59436074	59438074	-	954	5866	1003	5446	13.988	15.553	1.56453	0.00639622	0	-3.91086	1	1
Solyc01g057200	SL3.0ch01	59695973	59697973	-	4181	9925	4094	8927	29.64	31.442	1.80165	0.00085625	-0.282236	3.21284	0.457912	1
Solyc01g057210	SL3.0ch01	59816210	59818210	+	5549	6860	5490	6095	44.718	47.389	2.67132	2.67072e-05	-0.191293	5.45282	0.484759	1
Solyc01g057270	SL3.0ch01	60269134	60271134	+	4945	5319	5686	4894	48.178	53.743	5.56481	2.42257e-15	-0.479199	-1.59774	0.740824	1
Solyc01g057280	SL3.0ch01	60315327	60317327	-	902	3530	1124	3566	20.352	23.966	3.6139	2.8168e-05	1.01228	-0.140308	0.234505	1
Solyc01g057300	SL3.0ch01	60437667	60439667	-	1813	9170	2126	8436	16.507	20.129	3.62143	1.11885e-11	0.319914	-2.69959	0.8871	1
Solyc01g057310	SL3.0ch01	60470836	60472836	-	544	6376	585	5334	7.861	9.883	2.02215	4.76611e-05	-0.436381	1.37615	0.546481	1
Solyc01g057360	SL3.0ch01	60763174	60765174	-	1219	12198	1191	10198	9.085	10.457	1.37197	0.000210853	0	-3.91086	1	1
Solyc01g057355	SL3.0ch01	60763174	60765174	-	1219	12198	1191	10198	9.085	10.457	1.37197	0.000210853	0	-3.91086	1	1
Solyc01g057370	SL3.0ch01	60767831	60769831	-	1348	6470	1386	5875	17.242	19.088	1.84602	0.00210191	0	-3.91086	1	1
Solyc01g057380	SL3.0ch01	60805231	60807231	-	195	973	222	888	16.695	20	3.30479	0.0221669	0	-3.87049	1	1
Solyc01g057390	SL3.0ch01	60813726	60815726	-	1031	9100	1014	7641	10.177	11.716	1.53909	0.000513222	0	-3.91086	1	1
Solyc01g057410	SL3.0ch01	60857504	60859504	-	187	6163	322	5232	2.945	5.798	2.85274	4.27224e-14	0	-3.91086	1	1
Solyc01g057420	SL3.0ch01	60874629	60876629	-	2045	9331	2171	8228	17.976	20.877	2.90057	7.56886e-08	0	-3.91086	1	1
Solyc01g057430	SL3.0ch01	60891338	60893338	-	7305	6363	7033	4804	53.446	59.415	5.96939	3.81249e-21	-0.184035	0.734778	0.778758	1
Solyc01g057440	SL3.0ch01	60917137	60919137	-	6610	10361	6095	8033	38.949	43.141	4.19248	1.45417e-13	0.503926	1.34169	0.386438	1
Solyc01g057460	SL3.0ch01	60979001	60981001	+	2855	7828	2807	6328	26.725	30.728	4.00327	7.67372e-10	0.666054	4.86431	0.0481493	0.994919
Solyc01g057465	SL3.0ch01	61007314	61009314	+	1444	6223	1806	5272	18.834	25.516	6.68172	6.1085e-22	1.78818	-3.87428	1	1
Solyc01g057510	SL3.0ch01	61227445	61229445	+	6281	8893	6893	7825	41.393	46.834	5.44064	1.14561e-20	0	-3.87049	1	1
Solyc01g057520	SL3.0ch01	61249164	61251164	+	4414	7932	4472	6795	35.752	39.691	3.93866	6.53384e-10	-0.134073	4.9295	0.699803	1
Solyc01g057525	SL3.0ch01	61323327	61325327	-	416	5066	441	4046	7.588	9.828	2.23992	5.86134e-05	0	-3.91086	1	1
Solyc01g057530	SL3.0ch01	61414708	61416708	-	754	6909	956	7282	9.839	11.605	1.76527	0.000233169	0	-3.91086	1	1
Solyc01g057535	SL3.0ch01	61444089	61446089	+	1508	6852	1716	6867	18.038	19.993	1.95473	0.000794235	0	-3.91086	1	1
Solyc01g057560	SL3.0ch01	61689831	61691831	-	371	1990	650	1933	15.714	25.165	9.45086	5.04828e-16	0	-3.82946	1	1
Solyc01g057570	SL3.0ch01	61873480	61875480	+	481	1718	774	2010	21.874	27.802	5.92815	1.48873e-06	-0.316629	4.38508	0.264758	1
Solyc01g057580	SL3.0ch01	61939014	61941014	+	583	2413	969	3541	19.459	21.486	2.02631	0.017048	3.21886	-3.49907	0.533551	1
Solyc01g057660	SL3.0ch01	63387451	63389451	+	814	2909	924	2835	21.864	24.581	2.71692	0.00329547	0	-3.91086	1	1
Solyc01g057670	SL3.0ch01	63387834	63389834	+	1105	3831	1231	3559	22.387	25.699	3.31283	9.75641e-05	0	-3.91086	1	1
Solyc01g057685	SL3.0ch01	63470124	63472124	-	1020	4562	1023	3976	18.273	20.464	2.19107	0.00268048	1.83916	-2.36124	1	1
Solyc01g057700	SL3.0ch01	63475636	63477636	-	1527	5065	1477	4486	23.164	24.769	1.60497	0.0181993	0	-3.75208	1	1
Solyc01g057710	SL3.0ch01	63478723	63480723	-	1105	4536	1134	3924	19.589	22.42	2.8312	0.000247038	0	-3.91086	1	1
Solyc01g057720	SL3.0ch01	63482322	63484322	-	995	4480	888	3513	18.174	20.177	2.00372	0.00680081	0	-3.34949	1	1
Solyc01g057743	SL3.0ch01	63555356	63557356	-	1797	6052	1801	5271	22.895	25.467	2.57199	0.000178543	0	-3.91086	1	1
Solyc01g057747	SL3.0ch01	63557203	63559203	-	2307	7511	2389	7368	23.498	24.485	0.987328	0.0493084	0	-3.91086	1	1
Solyc01g057750	SL3.0ch01	63581600	63583600	+	891	4020	1030	3976	18.143	20.575	2.43237	0.00141289	0	-3.91086	1	1
Solyc01g057780	SL3.0ch01	63864896	63866896	-	3692	9747	3776	8901	27.472	29.786	2.31394	2.9374e-05	-0.127291	4.71809	0.702934	1
Solyc01g057800	SL3.0ch01	63899935	63901935	-	957	5141	1634	4662	15.694	25.953	10.2593	6.62871e-44	0	-3.91086	1	1
Solyc01g057805	SL3.0ch01	63914931	63916931	-	411	4846	438	4468	7.818	8.928	1.1097	0.0220228	-1.79494	-3.7339	1	1
Solyc01g057820	SL3.0ch01	63977636	63979636	-	1208	6078	1248	5383	16.58	18.821	2.24095	0.000377276	0	-3.91086	1	1
Solyc01g057830	SL3.0ch01	64028386	64030386	+	1846	5122	1878	4698	26.493	28.558	2.06586	0.00422637	-0.654175	6.48182	0.0817338	1
Solyc01g057840	SL3.0ch01	64051434	64053434	-	749	2908	395	1207	20.481	24.657	4.17541	0.000547303	-0.0981885	1.04498	0.860064	1
Solyc01g057850	SL3.0ch01	64079413	64081413	-	4239	9770	4213	8407	30.259	33.384	3.1244	5.32216e-08	0.630416	3.09001	0.359468	1
Solyc01g057852	SL3.0ch01	64081774	64083774	+	4117	8092	3623	6492	33.721	35.818	2.09707	0.00071327	0	-3.91086	1	1
Solyc01g057854	SL3.0ch01	64112931	64114931	+	1904	9312	1802	7573	16.976	19.221	2.24558	2.42069e-05	0	-3.91086	1	1
Solyc01g057900	SL3.0ch01	64174320	64176320	-	3705	9750	3575	8096	27.536	30.631	3.09525	7.98349e-08	0.137138	5.91088	0.622168	1
Solyc01g057990	SL3.0ch01	64658825	64660825	+	935	10154	960	9478	8.432	9.197	0.765385	0.0237802	0	-3.91086	1	1
Solyc01g058010	SL3.0ch01	64951101	64953101	+	3166	7256	2984	5519	30.378	35.093	4.71545	9.83495e-12	-0.0437007	3.25861	0.914721	1
Solyc01g058050	SL3.0ch01	64988291	64990291	-	673	3005	896	3405	18.298	20.832	2.53438	0.00276866	0	-3.91086	1	1
Solyc01g058070	SL3.0ch01	65002104	65004104	-	7290	9899	6355	8133	42.411	43.864	1.45304	0.0052551	0.746699	-3.57665	1	1
Solyc01g058100	SL3.0ch01	65142388	65144388	-	1079	9164	1453	8054	10.534	15.283	4.74945	9.30645e-23	0.318272	-3.08316	0.9296	1
Solyc01g058120	SL3.0ch01	65192846	65194846	-	752	2940	988	2555	20.368	27.886	7.51761	1.64224e-13	0	-3.91086	1	1
Solyc01g058160	SL3.0ch01	65488723	65490723	+	2497	9176	3158	8042	21.391	28.196	6.80518	7.71476e-32	-0.248394	1.49162	0.656145	1
Solyc01g058200	SL3.0ch01	65539397	65541397	-	65	2752	97	2496	2.307	3.741	1.43342	0.00143482	0.0199258	2.02657	0.979321	1
Solyc01g058220	SL3.0ch01	65597632	65599632	-	245	2599	702	3295	8.615	17.563	8.94855	1.91671e-26	0.615882	-3.42015	1	1
Solyc01g058230	SL3.0ch01	65702559	65704559	-	4730	5545	4844	4105	46.034	54.129	8.09489	2.90814e-28	4.30201	-0.553606	0.0513597	1
[truncated: 20,304 more rows]

## Sheet: PHYA_vs_WT_BK_hypomethylated
Supplementary Table 16. Total differentially methylated promoters (DMPs) in CHH context
[truncated: 7,280 more rows]

[truncated: 5 more sheets: PHYA_vs_WT_BK_hypermethylated, PHYB1B2_vs_WT_IG_hypomethylated, PHYB1B2_vs_WT_IG_hypermethylate, PHYB1B2_vs_WT_BK_hypomethylated, PHYB1B2_vs_WT_BK_hypermethylate]
