# Supplementary material for: Phytochrome-Mediated Light Perception Affects Fruit Development and Ripening Through Epigenetic Mechanisms
Source: Front Plant Sci. 2022 Apr 28;13:870974. doi: 10.3389/fpls.2022.870974 (PMC9096621; doi:10.3389/fpls.2022.870974)
Supplement: Supplementary file 14 [file Data_Sheet_14.XLSX]

## Sheet: PHYA_DMP_DE_IG_All
Supplementary Table 17. DMPs in all mC contexts associated with DEGs
Gene_ID	chr	from	to	strand	met_WT	unmet_WT	met_PHYA	unmet_PHYA	X.met_WT	X.met_PHYA	X.diff_PHYA.WT	FDR_diff_PHYA.WT	logFC_PHYA	logCPM_PHYA	PValue_PHYA	padj_PHYA	sRNA_clusters	Correlation	Description	GO_Term	GO_name	NCBI	A._thaliana_ortholog
Solyc00g010750	SL3.0ch00	8954513	8956513	-	2339	5812	2282	4793	28.696	32.254	3.55855	1.80953e-06	-7.08728	-2.19298	6.96632e-05	0.0145714		meth_hyper_RNA_down	Guanylate-binding family protein	GO:0003924|GO:0005525	GTPase activity | GTP binding	XP_025884064.1	AT5G46070.1
Solyc01g016455	SL3.0ch01	19933831	19935831	-	1035	2904	1067	2427	26.276	30.538	4.26236	3.8327e-05	-4.74253	2.55628	4.6921e-09	3.22744e-06		meth_hyper_RNA_down	Ubiquitin carboxyl-terminal hydrolase-related protein	0	0	XP_010318961.1	0
Solyc01g016460	SL3.0ch01	19931727	19933727	-	101	2632	3236	6827	3.696	32.157	28.4618	3.75516e-256	-5.21158	-0.617724	9.49905e-08	5.22711e-05		meth_hyper_RNA_down	Phototropic-responsive NPH3 family protein	0	0	0	0
Solyc01g066613	SL3.0ch01	74534052	74536052	+	10985	19140	8828	14151	36.465	38.418	1.95296	3.67914e-06	-5.44082	2.2714	4.85567e-19	1.02163e-15		meth_hyper_RNA_down	Guanylate-binding family protein	GO:0003924|GO:0005525	GTPase activity | GTP binding	XP_025886291.1	0
Solyc01g080020	SL3.0ch01	79002938	79004938	-	6462	10432	6544	8661	38.25	43.038	4.78821	7.66546e-18	-2.04508	5.74884	4.42576e-06	0.00152212		meth_hyper_RNA_down	Eukaryotic aspartyl protease family protein, putative	GO:0004190|GO:0006508	aspartic-type endopeptidase activity | proteolysis	XP_004229435.1	AT1G03230.1
Solyc01g096670	SL3.0ch01	87574614	87576614	+	735	2966	939	3032	19.859	23.646	3.78694	4.50857e-05	-3.81489	0.130527	2.0079e-06	0.000789217		meth_hyper_RNA_down	Cytochrome P450, putative	GO:0016705|GO:0055114	oxidoreductase activity, acting on paired donors, with incorporation or reduction of molecular oxygen | oxidation-reduction process	XP_004230046.1	AT2G40890.1
Solyc01g100750	SL3.0ch01	90584534	90586534	+	2621	7386	2439	5973	26.192	28.994	2.80263	1.87928e-05	-4.44115	0.3169	0.00023043	0.036098		meth_hyper_RNA_down	LOW QUALITY:plant/protein (Protein of unknown function, DUF538)	0	0	XP_004230325.1	AT1G56580.1
Solyc02g014430	SL3.0ch02	17039008	17041008	-	4716	9534	4174	7713	33.095	35.114	2.01925	0.000402093	-4.02011	2.27961	0.000102686	0.0193309		meth_hyper_RNA_down	Equilibrative nucleoside transporter	GO:0005337|GO:0006810|GO:0016021	nucleoside transmembrane transporter activity | transport | integral component of membrane	XP_004231487.1	AT4G05120.1
Solyc02g070940	SL3.0ch02	41068955	41070955	+	776	2783	938	3036	21.804	23.603	1.79954	0.0298192	-2.88606	4.26419	1.96994e-05	0.00537869		meth_hyper_RNA_down	Chlorophyll a-b binding protein, chloroplastic	GO:0009765|GO:0016020	photosynthesis, light harvesting | membrane	NP_001333218.1	AT1G29930.1
Solyc02g073571	SL3.0ch02	42319336	42321336	-	11699	14741	5383	6479	44.247	45.38	1.13285	0.0190176	-4.66596	0.835815	2.3621e-10	2.16635e-07	Yes	meth_hyper_RNA_down	UPF0183 protein family	0	0	XP_019067938.2	0
Solyc02g076640	SL3.0ch02	42365656	42367656	+	532	2015	1474	2669	20.887	35.578	14.6908	3.70573e-37	-2.99291	-0.743085	0.000298831	0.0432385		meth_hyper_RNA_down	LOW QUALITY:transcription factor-like protein	GO:0006351|GO:0043565	transcription, DNA-templated | sequence-specific DNA binding	XP_010316825.1	AT4G18650.1
Solyc02g086970	SL3.0ch02	50178076	50180076	-	3278	4434	3358	3421	42.505	49.535	7.03014	6.21246e-17	-2.60619	7.45274	8.95838e-09	5.93377e-06	Yes	meth_hyper_RNA_down	Aldehyde dehydrogenase	GO:0008152|GO:0016491|GO:0055114	metabolic process | oxidoreductase activity | oxidation-reduction process	XP_010316283.1	AT1G23800.1
Solyc03g005780	SL3.0ch03	541038	543038	+	269	1035	1942	3879	20.629	33.362	12.7331	7.77637e-20	-3.83716	2.52088	0.000132713	0.0234993		meth_hyper_RNA_down	chlorophyll a/b-binding protein Cab-3C	GO:0009765|GO:0016020	photosynthesis, light harvesting | membrane	NP_001316912.1	AT1G29930.1
Solyc03g006100	SL3.0ch03	762579	764579	+	196	1630	205	676	10.734	23.269	12.5352	1.60894e-16	-4.57114	3.66929	7.65543e-07	0.000346607	Yes	meth_hyper_RNA_down	Receptor-kinase, putative	GO:0005524	ATP binding	XP_004234250.3	AT3G47570.1
Solyc03g006410	SL3.0ch03	1007223	1009223	+	5344	9690	4825	7515	35.546	39.1	3.55439	1.90691e-09	-4.64896	-1.24249	0.000352944	0.0488255		meth_hyper_RNA_down	DUF506 family protein	0	0	XP_004234117.1	AT4G32480.1
Solyc03g006540	SL3.0ch03	1112459	1114459	-	6343	7140	5335	5741	47.044	48.167	1.12278	0.0362357	-6.42356	-1.87923	8.94363e-06	0.00273415		meth_hyper_RNA_down	NADH-ubiquinone oxidoreductase 75 kDa subunit, mitochondrial	0	0	XP_004234127.1	AT2G01755.1
Solyc03g081240	SL3.0ch03	53571611	53573611	-	4183	9962	4399	7510	29.572	36.938	7.36616	2.43907e-35	-1.48817	4.40796	7.44164e-05	0.0153857		meth_hyper_RNA_down	Two-component response regulator-like protein	GO:0005515	protein binding	XP_004235024.1	AT5G24470.1
Solyc04g064763	SL3.0ch04	55925367	55927367	-	2545	7251	2849	6630	25.98	30.056	4.07592	4.31589e-10	-4.29018	4.91636	1.74346e-22	4.79693e-19		meth_hyper_RNA_down	Zinc finger CCCH domain-containing protein 38	GO:0046872	metal ion binding	XP_004237735.1	0
Solyc04g064765	SL3.0ch04	55926123	55928123	-	4666	8703	4214	7083	34.902	37.302	2.4003	6.96472e-05	-5.27136	1.5348	6.11557e-07	0.000291656		meth_hyper_RNA_down	exostosin family protein	0	0	XP_004237735.1	0
Solyc05g007790	SL3.0ch05	2239329	2241329	-	3924	8833	3570	7445	30.76	32.41	1.65077	0.00349778	-5.3988	-2.53535	0.000101295	0.0191936	Yes	meth_hyper_RNA_down	CASP-like protein	0	0	XP_004238811.1	AT5G15290.1
Solyc05g010580	SL3.0ch05	4785433	4787433	+	3730	10192	3611	8945	26.792	28.759	1.96703	0.000247471	-6.86214	-2.80828	4.18187e-05	0.0100387		meth_hyper_RNA_down	Nodule Cysteine-Rich (NCR) secreted peptide	0	0	XP_025886757.1	0
Solyc05g024230	SL3.0ch05	30897748	30899748	-	1391	5950	1809	5735	18.948	23.979	5.03095	1.55444e-13	-3.01228	2.79756	0.00014161	0.0241371		meth_hyper_RNA_down	ATP-dependent 6-phosphofructokinase	0	0	XP_004245542.1	0
Solyc05g055990	SL3.0ch05	66239864	66241864	+	5136	10297	4415	8085	33.279	35.32	2.04066	0.000244271	-4.92136	-0.563438	0.000195117	0.0315232	Yes	meth_hyper_RNA_down	plasma membrane intrinsic protein 2.12	GO:0005215|GO:0006810|GO:0016020	transporter activity | transport | membrane	XP_004239679.1	AT3G53420.1
Solyc06g063370	SL3.0ch06	40166148	40168148	-	12898	9564	13281	7425	57.421	64.141	6.71941	4.00409e-45	-1.88332	7.14593	0.000250914	0.0376259		meth_hyper_RNA_down	Type I (26 kD) CP29 polypeptide	GO:0009765|GO:0016020	photosynthesis, light harvesting | membrane	NP_001317571.1	AT4G10340.1
Solyc06g066280	SL3.0ch06	41701067	41703067	-	318	8670	240	5446	3.538	4.221	0.682843	0.017942	-4.68152	-1.24059	5.12965e-05	0.0118372		meth_hyper_RNA_down	Cytochrome P450, putative	GO:0016705|GO:0055114	oxidoreductase activity, acting on paired donors, with incorporation or reduction of molecular oxygen | oxidation-reduction process	XP_019069749.1	AT2G45550.1
Solyc06g068670	SL3.0ch06	42688296	42690296	-	8145	7196	10163	7640	53.093	57.086	3.99287	6.1199e-13	-1.22797	6.03224	0.00017907	0.0291135		meth_hyper_RNA_down	ACT domain-containing protein	GO:0008152|GO:0016597	metabolic process | amino acid binding	NP_001295110.1	AT1G16880.1
Solyc06g073300	SL3.0ch06	45301929	45303929	-	7241	6669	7490	5962	52.056	55.679	3.62338	2.44696e-09	-1.55171	8.56217	9.38772e-06	0.00282168		meth_hyper_RNA_down	60S ribosomal protein L27	GO:0003735|GO:0005622|GO:0005840|GO:0006412	structural constituent of ribosome | intracellular | ribosome | translation	XP_004241408.1	AT4G15000.1
Solyc07g007250	SL3.0ch07	1986956	1988956	+	7341	7286	8134	6948	50.188	53.932	3.74383	1.64629e-10	-2.33178	5.25423	6.45324e-05	0.0139048		meth_hyper_RNA_down	Metallocarboxypeptidase inhibitor	GO:0004866	endopeptidase inhibitor activity	NP_001233934.1	0
Solyc07g051845	SL3.0ch07	60505100	60507100	+	3720	6793	4451	5936	35.385	42.852	7.46688	1.0808e-27	-6.60654	-2.78194	5.97724e-05	0.0133621	Yes	meth_hyper_RNA_down	Disease resistance protein (TIR-NBS-LRR class) family	0	0	XP_010325813.1	0
Solyc08g079370	SL3.0ch08	63051024	63053024	+	927	4773	1278	4563	16.263	21.88	5.61666	3.22012e-14	-6.78443	-2.81311	0.000250655	0.0376259		meth_hyper_RNA_down	Cytochrome P450 family protein	GO:0016705|GO:0055114	oxidoreductase activity, acting on paired donors, with incorporation or reduction of molecular oxygen | oxidation-reduction process	XP_004246143.1	AT4G12300.1
Solyc08g082990	SL3.0ch08	65729354	65731354	+	592	4949	907	5762	10.684	13.6	2.91625	8.83113e-07	-3.02924	5.51454	4.77356e-11	4.87831e-08		meth_hyper_RNA_down	Oligopeptide transporter, putative	GO:0055085	transmembrane transport	XP_004245468.1	AT4G10770.1
Solyc09g005765	SL3.0ch09	533830	535830	+	2490	3625	2518	2673	40.72	48.507	7.78749	2.47451e-16	-7.36319	-2.52665	1.70375e-05	0.00468767	Yes	meth_hyper_RNA_down	T-complex protein 1 subunit zeta 1	0	0	XP_004246931.1	0
Solyc09g009530	SL3.0ch09	2939581	2941581	-	3785	7012	4026	6997	35.056	36.524	1.4676	0.0119025	-1.28106	6.4502	8.32549e-06	0.00258944	Yes	meth_hyper_RNA_down	alpha/beta-Hydrolases superfamily protein	0	0	NP_001311389.1	AT2G36290.1
Solyc09g014310	SL3.0ch09	5819915	5821915	+	5305	7134	5032	5835	42.648	46.305	3.65721	2.39906e-08	-4.80692	0.358446	0.000115563	0.0213064		meth_hyper_RNA_down	Desiccation-related PCC13-62	0	0	XP_004246335.2	AT3G62730.1
Solyc09g015380	SL3.0ch09	8711571	8713571	-	29	2105	2846	8820	1.359	24.396	23.0367	8.59674e-185	-6.02643	0.891972	0.000354463	0.0488255	Yes	meth_hyper_RNA_down	Abscisic acid receptor	0	0	XP_004246292.1	AT2G40330.1
Solyc09g042670	SL3.0ch09	24986929	24988929	+	1087	3157	3826	7609	25.613	33.459	7.84605	6.94423e-21	-3.8892	2.20506	4.29712e-12	4.52057e-09		meth_hyper_RNA_down	Methyltransferase MT-A70 family protein isoform 1	0	0	XP_004246979.1	0
Solyc09g055660	SL3.0ch09	43749647	43751647	+	719	1528	2406	4520	31.998	34.739	2.74045	0.00881358	-6.19571	-0.456335	6.14075e-08	3.53866e-05		meth_hyper_RNA_down	Bromodomain	GO:0005515	protein binding	XP_019071059.1	AT1G20670.1
Solyc09g057660	SL3.0ch09	50351307	50353307	-	107	269	6709	8002	28.457	45.605	17.1479	2.83785e-11	-1.03625	6.73475	0.00032202	0.0458885		meth_hyper_RNA_down	Peptidyl-prolyl cis-trans isomerase	GO:0005515	protein binding	XP_004247044.1	AT3G25230.2
Solyc09g058980	SL3.0ch09	52937820	52939820	+	658	2292	3687	10078	22.305	26.785	4.48024	3.54032e-07	-3.23289	0.554061	5.64831e-05	0.0127866		meth_hyper_RNA_down	long-chain acyl-CoA synthetase 7	0	0	XP_004243697.1	0
Solyc09g059020	SL3.0ch09	53237570	53239570	-	563	3314	2784	7739	14.522	26.456	11.9348	2.54641e-53	-4.7845	4.88472	4.66904e-28	1.85558e-24		meth_hyper_RNA_down	Quinone-oxidoreductase QR1	GO:0016491	oxidoreductase activity	XP_010326282.1	AT4G13010.1
Solyc09g059125	SL3.0ch09	53649753	53651753	+	18	1460	128	2777	1.218	4.406	3.18833	4.25514e-09	-7.52551	-2.15175	3.55982e-07	0.000179335		meth_hyper_RNA_down	CW14 protein (DUF1336)	0	0	XP_004236975.1	0
Solyc09g059130	SL3.0ch09	53654259	53656259	+	429	971	4029	7587	30.643	34.685	4.04206	0.00152541	-8.12072	-0.713136	3.99624e-07	0.000198524		meth_hyper_RNA_down	LOW QUALITY:RING/U-box superfamily protein	GO:0005515|GO:0008270	protein binding | zinc ion binding	XP_004247279.1	AT3G19950.1
Solyc09g059170	SL3.0ch09	53806970	53808970	-	192	731	3393	6367	20.802	34.764	13.9626	1.91848e-18	-3.5765	3.70126	6.75075e-06	0.00221524		meth_hyper_RNA_down	Glycosyltransferase	GO:0008152|GO:0016758	metabolic process | transferase activity, transferring hexosyl groups	XP_004247056.1	AT5G54010.1
Solyc09g059477	SL3.0ch09	54796992	54798992	-	833	2541	6193	13088	24.689	32.12	7.43091	6.12506e-18	-6.75198	-1.45943	7.77345e-05	0.0157085		meth_hyper_RNA_down	Transducin/WD40 repeat-like superfamily protein	0	0	XP_025888768.1	0
Solyc09g063040	SL3.0ch09	61283122	61285122	-	1271	1655	6752	6829	43.438	49.717	6.27837	9.58101e-10	-8.39893	-1.79177	5.20592e-07	0.000251629		meth_hyper_RNA_down	LOW QUALITY:NBS-LRR resistance protein-like protein	GO:0043531	ADP binding	XP_019069506.1	0
Solyc09g074380	SL3.0ch09	66601065	66603065	-	8192	9798	7654	7843	45.536	49.39	3.8538	3.34522e-12	-3.49855	2.86638	6.23803e-07	0.000293581	Yes	meth_hyper_RNA_down	DCD (Development and Cell Death) domain protein	0	0	XP_010326613.1	AT2G32910.1
Solyc10g005030	SL3.0ch10	39073	41073	+	6661	9558	5905	7262	41.069	44.847	3.77785	1.19417e-10	-1.61051	2.9527	0.000245646	0.0376076	Yes	meth_hyper_RNA_down	Pseudo-response regulator 9	GO:0005515	protein binding	XP_010327246.1	AT5G24470.1
Solyc06g034310	SL3.0ch10	8931370	8933370	-	3687	4696	2841	3299	43.982	46.27	2.28849	0.00344283	-4.98102	0.259469	4.7966e-06	0.00163395		meth_hyper_RNA_down	Myb/SANT-like DNA-binding domain protein	0	0	XP_025883703.1	AT5G35695.1
Solyc10g054900	SL3.0ch10	56003542	56005542	+	3589	9422	3833	8444	27.584	31.221	3.63663	3.16908e-10	-3.65713	3.55907	7.46445e-09	5.03752e-06		meth_hyper_RNA_down	Proline-rich protein	0	0	XP_004248679.1	AT4G38770.1
Solyc10g078610	SL3.0ch10	60505014	60507014	-	781	4801	1025	4636	13.991	18.106	4.11494	3.58102e-09	-7.07749	-0.387019	4.22833e-06	0.00146834	Yes	meth_hyper_RNA_down	Ethylene-responsive transcription factor	GO:0003700|GO:0006355	DNA-binding transcription factor activity | regulation of transcription, DNA-templated	XP_004249156.1	AT5G19790.1
Solyc10g085850	SL3.0ch10	65025134	65027134	+	5087	10365	5175	8553	32.921	37.697	4.77537	4.46033e-17	-1.74151	4.07653	0.000340192	0.0473463	Yes	meth_hyper_RNA_down	LOW QUALITY:S-locus lectin protein kinase family protein	0	0	XP_010316864.1	0
Solyc10g086620	SL3.0ch10	65511525	65513525	+	3192	8134	3254	6112	28.183	34.743	6.55974	1.80682e-23	-2.5121	4.21801	7.07893e-06	0.00228119		meth_hyper_RNA_down	NAD(P)-binding Rossmann-fold superfamily protein	GO:0016491	oxidoreductase activity	XP_004249635.1	AT5G06060.1
Solyc12g011040	SL3.0ch12	3904375	3906375	-	7619	10278	6985	8624	42.571	44.75	2.17844	4.55862e-05	-3.97645	0.109427	9.05079e-05	0.0179733	Yes	meth_hyper_RNA_down	Lipoxygenase	GO:0016702|GO:0046872|GO:0055114	oxidoreductase activity, acting on single donors with incorporation of molecular oxygen, incorporation of two atoms of oxygen | metal ion binding | oxidation-reduction process	XP_004251816.1	AT3G45140.1
Solyc12g036870	SL3.0ch12	48501578	48503578	+	2827	5122	2566	4364	35.564	37.027	1.4632	0.0297022	-8.79634	-0.399952	1.16996e-09	8.90366e-07		meth_hyper_RNA_down	Myb/SANT-like DNA-binding domain protein	0	0	XP_019067004.1	AT4G02550.3
Solyc12g038805	SL3.0ch12	51895705	51897705	+	2046	6280	2474	6296	24.574	28.21	3.63618	8.02311e-08	-3.65229	-0.0447673	3.72091e-05	0.00911571		meth_hyper_RNA_down	Serine/threonine-protein kinase	0	0	XP_010321858.1	0
Solyc01g009810	SL3.0ch01	4183116	4185116	+	4553	8599	3928	7068	34.618	35.722	1.10377	0.0334904	10.4758	0.898053	9.10703e-05	0.0179733		meth_hyper_RNA_up	Leucine-rich repeat receptor-like kinase protein	GO:0005515	protein binding	XP_004228437.1	AT5G21090.1
Solyc01g014390	SL3.0ch01	12867978	12869978	+	4839	7132	5530	6810	40.423	44.814	4.39093	7.72115e-12	5.34939	0.4447	7.84549e-11	7.79493e-08		meth_hyper_RNA_up	DNA-directed RNA polymerase subunit beta''	0	0	XP_004238280.1	0
Solyc01g016970	SL3.0ch01	23127325	23129325	+	7726	10997	7356	10027	41.265	42.317	1.05245	0.0206624	2.33195	1.1362	7.2251e-05	0.0150249		meth_hyper_RNA_up	LOW QUALITY:Autophagy protein 5	0	0	0	0
Solyc01g044480	SL3.0ch01	44022735	44024735	+	4763	6366	4964	5845	42.798	45.925	3.1266	2.94615e-06	6.64798	-1.63033	0.00010142	0.0191936		meth_hyper_RNA_up	Elongation factor P	GO:0003746|GO:0006414	translation elongation factor activity | translational elongation	XP_004228965.1	AT4G26310.2
Solyc01g087950	SL3.0ch01	82673040	82675040	-	5409	10200	4670	7788	34.653	37.486	2.83287	8.6763e-07	4.12945	6.00203	1.06005e-07	5.7448e-05		meth_hyper_RNA_up	Carboxypeptidase	GO:0004185|GO:0006508	serine-type carboxypeptidase activity | proteolysis	XP_004229672.1	AT3G63470.1
Solyc01g098490	SL3.0ch01	88863660	88865660	+	10433	12251	9596	9991	45.993	48.992	2.99891	1.00541e-09	1.92849	3.53737	0.000299797	0.0432385		meth_hyper_RNA_up	Sugar facilitator protein 1	GO:0016021|GO:0022857|GO:0055085	integral component of membrane | transmembrane transporter activity | transmembrane transport	XP_010312431.1	AT1G54730.2
Solyc01g104130	SL3.0ch01	92490454	92492454	+	10929	11428	10622	9060	48.884	53.968	5.08407	1.07363e-24	1.53754	6.90557	0.00021802	0.0345051		meth_hyper_RNA_up	2-oxoglutarate (2OG) and Fe(II)-dependent oxygenase-like protein	GO:0016491|GO:0055114	oxidoreductase activity | oxidation-reduction process	XP_004230493.1	AT2G17970.1
Solyc01g107830	SL3.0ch01	95141744	95143744	-	3606	6597	3798	5367	35.343	41.44	6.09772	8.49606e-18	1.89818	7.7244	3.45129e-05	0.00863257		meth_hyper_RNA_up	Glycosyltransferase	GO:0008152|GO:0016758	metabolic process | transferase activity, transferring hexosyl groups	XP_004230760.1	AT4G34131.1
Solyc01g107857	SL3.0ch01	95141768	95143768	+	3627	6525	3796	5282	35.727	41.815	6.08843	1.39117e-17	2.32915	4.23231	2.85722e-05	0.00740559		meth_hyper_RNA_up	Glycosyltransferase	GO:0008152|GO:0016758	metabolic process | transferase activity, transferring hexosyl groups	NP_001315561.1	0
Solyc01g108975	SL3.0ch01	96002607	96004607	+	6171	6380	6280	5078	49.167	55.291	6.12403	1.02814e-20	7.65084	-1.53468	0.000132071	0.0234993		meth_hyper_RNA_up	Germacrene A oxidase	0	0	XP_025884759.1	0
Solyc01g109010	SL3.0ch01	96017540	96019540	-	6948	9892	6437	7677	41.259	45.607	4.34829	3.18131e-14	8.62249	-0.834748	0.000239267	0.0370481		meth_hyper_RNA_up	Sorting nexin-16	0	0	XP_025884400.1	AT2G15900.1
Solyc02g031960	SL3.0ch02	27705206	27707206	+	3389	8761	3733	7824	27.893	32.301	4.40777	2.84658e-13	3.88804	2.50803	5.29135e-05	0.0121321		meth_hyper_RNA_up	Pectate lyase	GO:0030570	pectate lyase activity	XP_004231596.1	AT2G02720.1
Solyc02g032170	SL3.0ch02	28271413	28273413	-	2965	5736	3380	5349	34.077	38.722	4.64496	2.81599e-10	2.09851	1.49548	0.000354916	0.0488255	Yes	meth_hyper_RNA_up	Alpha/beta-hydrolase	0	0	XP_025888029.1	0
Solyc02g062390	SL3.0ch02	34529755	34531755	+	3255	5569	3735	5017	36.888	42.676	5.78793	1.0341e-14	2.4069	6.3406	4.63637e-05	0.0108388		meth_hyper_RNA_up	Dehydrin	GO:0006950|GO:0009415	response to stress | response to water	XP_004233545.1	0
Solyc02g067790	SL3.0ch02	38465948	38467948	+	4479	9691	5182	9949	31.609	34.248	2.63854	1.46104e-06	3.83682	1.80274	0.000247418	0.0376076	Yes	meth_hyper_RNA_up	High affinity nitrate transporter	GO:0016021|GO:0055085	integral component of membrane | transmembrane transport	XP_004233327.2	AT5G14570.1
Solyc02g070110	SL3.0ch02	40513280	40515280	-	3085	7843	2867	6807	28.23	29.636	1.4059	0.0131625	10.5271	0.897886	0.000118742	0.0216693		meth_hyper_RNA_up	FAD-binding Berberine family protein	GO:0050660	flavin adenine dinucleotide binding	XP_004233882.2	AT5G44440.1
Solyc02g070280	SL3.0ch02	40628208	40630208	-	10818	10061	10659	8444	51.813	55.798	3.98469	3.22202e-15	3.13265	2.11074	6.55554e-05	0.0139571	Yes	meth_hyper_RNA_up	Cationic amino acid transporter, putative	GO:0003333|GO:0015171|GO:0016020	amino acid transmembrane transport | amino acid transmembrane transporter activity | membrane	XP_019067803.1	AT4G21120.1
Solyc02g084037	SL3.0ch02	47815863	47817863	-	1300	5205	4215	6050	19.985	41.062	21.0772	2.27249e-181	4.75541	-0.286793	3.45079e-05	0.00863257		meth_hyper_RNA_up	stress response NST1-like protein	0	0	XP_025885257.1	0
Solyc02g085600	SL3.0ch02	49065312	49067312	+	1223	5319	1615	5551	18.695	22.537	3.84239	3.18465e-08	1.91125	6.14515	6.23282e-08	3.53866e-05	Yes	meth_hyper_RNA_up	Transcription factor GRAS	0	0	XP_004232383.1	AT4G36710.1
Solyc03g006030	SL3.0ch03	716984	718984	-	7420	8739	7136	6107	45.919	53.885	7.96639	5.21674e-41	3.53964	2.05945	1.61897e-05	0.00452402	Yes	meth_hyper_RNA_up	LRR receptor-like kinase	GO:0005524	ATP binding	XP_019068299.1	AT4G20140.1
Solyc03g034140	SL3.0ch03	5863986	5865986	+	6878	9576	6870	8782	41.801	43.892	2.09077	0.000110823	2.22555	3.46511	9.24888e-05	0.017979		meth_hyper_RNA_up	Quinone reductase family protein	GO:0016491	oxidoreductase activity	XP_004234563.1	AT4G36750.1
Solyc03g045140	SL3.0ch03	11652595	11654595	-	2937	10888	2890	10036	21.244	22.358	1.11392	0.0139266	4.42797	2.15272	1.42646e-09	1.04126e-06		meth_hyper_RNA_up	Cyclopropane-fatty-acyl-phospholipid synthase	GO:0016491|GO:0055114	oxidoreductase activity | oxidation-reduction process	XP_004234691.1	AT3G23530.1
Solyc03g059435	SL3.0ch03	31928715	31930715	-	5420	6705	9324	6679	44.701	58.264	13.563	4.91001e-111	7.21903	-2.07436	0.000196535	0.0315232		meth_hyper_RNA_up	Serine/threonine protein phosphatase 7 long form isogeny	0	0	XP_019069006.1	0
Solyc03g059460	SL3.0ch03	31929361	31931361	-	4165	5908	7981	6211	41.348	56.236	14.8877	3.55028e-114	6.66021	-2.08385	5.81878e-05	0.0130897		meth_hyper_RNA_up	Serine/threonine protein phosphatase 7 long form isogeny	0	0	XP_025887697.1	AT1G48120.1
Solyc03g078490	SL3.0ch03	52438728	52440728	+	5903	13854	6091	10508	29.878	36.695	6.81696	6.55908e-42	7.74127	-0.0552641	0.000174111	0.0284365		meth_hyper_RNA_up	Glycosyltransferase	GO:0008152|GO:0016758	metabolic process | transferase activity, transferring hexosyl groups	XP_004235065.1	AT1G22340.1
Solyc03g096670	SL3.0ch03	60421936	60423936	+	1767	9927	2127	10140	15.11	17.339	2.22889	2.78961e-06	1.49931	5.96689	0.000139064	0.0241268		meth_hyper_RNA_up	Protein phosphatase 2C	GO:0043169	cation binding	NP_001234692.2	AT3G11410.1
Solyc03g097580	SL3.0ch03	61344106	61346106	-	1436	8190	1260	6280	14.918	16.711	1.79294	0.00086398	2.62212	5.25906	1.26615e-05	0.003623		meth_hyper_RNA_up	Bidirectional sugar transporter SWEET	GO:0016021	integral component of membrane	XP_019068532.1	AT5G50790.1
Solyc03g097700	SL3.0ch03	61465504	61467504	-	2919	12265	3021	11675	19.224	20.557	1.33243	0.0023308	1.71066	7.24532	6.20981e-05	0.0137958		meth_hyper_RNA_up	O-methyltransferase	GO:0046983	protein dimerization activity	XP_004235335.1	AT4G35160.1
Solyc03g122130	SL3.0ch03	71560816	71562816	+	3201	7039	3505	7020	31.26	33.302	2.0419	0.00104746	6.71228	1.24728	3.518e-06	0.00125832		meth_hyper_RNA_up	Peroxisomal (S)-2-hydroxy-acid oxidase	GO:0016491|GO:0055114	oxidoreductase activity | oxidation-reduction process	XP_004235561.1	AT3G14130.1
Solyc04g008500	SL3.0ch04	2121343	2123343	+	4633	7422	5289	6869	38.432	43.502	5.07003	2.54568e-15	1.94982	3.25557	1.24326e-06	0.000523163		meth_hyper_RNA_up	Zinc finger protein, putative	GO:0046872	metal ion binding	XP_004236896.1	AT2G02080.1
Solyc04g010155	SL3.0ch04	3476912	3478912	+	256	1186	700	1949	17.753	26.425	8.67195	3.6774e-10	4.39656	0.10771	0.000152054	0.0254144		meth_hyper_RNA_up	Pax6	0	0	XP_019068839.1	0
Solyc04g011540	SL3.0ch04	3969962	3971962	+	11746	9420	12770	9355	55.495	57.718	2.22285	2.84607e-06	2.36947	3.88939	7.54117e-05	0.0155019		meth_hyper_RNA_up	Calcium-dependent lipid-binding (CaLB domain) family protein	GO:0005515	protein binding	XP_010319255.1	AT3G55470.1
Solyc04g016470	SL3.0ch04	7301619	7303619	+	5268	7469	4747	6019	41.36	44.093	2.7327	2.01129e-05	3.75339	6.56721	0.000247059	0.0376076		meth_hyper_RNA_up	LEQA L.esculentum TomQ'a beta(1,3)glucanase	GO:0005975	carbohydrate metabolic process	NP_001234155.2	AT3G57260.1
Solyc04g071770	SL3.0ch04	58829265	58831265	+	270	7889	416	7754	3.309	5.092	1.78257	1.61413e-08	2.06949	3.8491	0.000317436	0.0454162		meth_hyper_RNA_up	Ethylene-responsive transcription factor	GO:0003700|GO:0006355	DNA-binding transcription factor activity | regulation of transcription, DNA-templated	XP_004237817.1	AT5G50080.1
Solyc05g010517	SL3.0ch05	4725243	4727243	-	4481	9171	4500	7724	32.823	36.813	3.9898	2.75468e-11	3.35557	0.850733	1.16845e-06	0.000499513	Yes	meth_hyper_RNA_up	BZip transcription factor	GO:0003700|GO:0006355|GO:0043565	DNA-binding transcription factor activity | regulation of transcription, DNA-templated | sequence-specific DNA binding	XP_004239003.1	0
Solyc05g023990	SL3.0ch05	30172672	30174672	-	5523	5856	5060	4338	48.537	53.841	5.30446	5.38206e-14	7.07138	-1.96632	3.8575e-05	0.00938606	Yes	meth_hyper_RNA_up	LOW QUALITY:Leucine-rich receptor-like protein kinase family protein	0	0	XP_004238042.1	0
Solyc05g024260	SL3.0ch05	30967404	30969404	+	3529	9865	3309	8589	26.348	27.811	1.46378	0.00487419	2.59479	6.7693	7.69739e-05	0.0156432		meth_hyper_RNA_up	Bidirectional sugar transporter SWEET	GO:0016021	integral component of membrane	XP_004239304.1	AT5G13170.1
Solyc05g025683	SL3.0ch05	35776404	35778404	-	6088	8440	5083	6281	41.905	44.729	2.82368	4.83806e-06	2.51695	2.23712	9.74735e-05	0.0188456		meth_hyper_RNA_up	Respiratory burst oxidase, putative	0	0	XP_004239582.1	0
Solyc06g005960	SL3.0ch06	939678	941678	+	6892	11399	6766	9113	37.68	42.61	4.93	6.17526e-20	2.37477	5.35016	5.25683e-08	3.0824e-05		meth_hyper_RNA_up	dentin sialophosphoprotein	0	0	XP_010321911.1	AT5G17910.1
Solyc06g024380	SL3.0ch06	11247033	11249033	+	2730	1672	2753	1286	62.017	68.16	6.14317	4.64569e-09	2.79522	1.97949	0.000272777	0.0399864		meth_hyper_RNA_up	DNA polymerase epsilon catalytic subunit	0	0	XP_025884342.1	0
Solyc06g051800	SL3.0ch06	35570316	35572316	-	4696	10296	5051	9981	31.323	33.602	2.27828	1.96449e-05	2.30045	6.79947	3.00342e-05	0.00761889		meth_hyper_RNA_up	expansin 1	GO:0009664	plant-type cell wall organization	NP_001233958.1	AT2G39700.1
Solyc06g059720	SL3.0ch06	37699853	37701853	-	8112	7890	10876	8186	50.694	57.056	6.36226	8.1441e-32	4.86168	3.69572	9.14544e-05	0.0179733		meth_hyper_RNA_up	Acyl-[acyl-carrier-protein] desaturase	GO:0016491|GO:0055114	oxidoreductase activity | oxidation-reduction process	XP_004242060.1	AT1G43800.1
Solyc06g071580	SL3.0ch06	44205172	44207172	+	1582	5179	2171	5808	23.399	27.209	3.81002	1.2504e-07	2.74568	2.91116	2.03225e-06	0.000790104		meth_hyper_RNA_up	MORC family CW-type zinc finger protein 4	0	0	XP_010322545.1	AT1G19100.1
Solyc07g006600	SL3.0ch07	1446389	1448389	+	1920	7758	1562	5675	19.839	21.584	1.74472	0.0031409	2.40998	4.75156	2.10678e-05	0.00565112		meth_hyper_RNA_up	glutamine dumper 3	0	0	XP_004242668.1	AT5G57685.1
Solyc07g026710	SL3.0ch07	30487940	30489940	+	2972	6667	2866	4501	30.833	38.903	8.07014	3.26041e-27	9.64444	0.806031	4.56901e-17	8.17121e-14		meth_hyper_RNA_up	Transposon protein, putative, Mutator sub-class	0	0	XP_025886080.1	0
Solyc07g039440	SL3.0ch07	47589327	47591327	-	2778	6458	4693	6130	30.078	43.361	13.2834	8.65513e-83	7.55634	-0.516583	2.4308e-06	0.000905674		meth_hyper_RNA_up	LOW QUALITY:Disease resistance protein	GO:0043531	ADP binding	XP_010319324.1	AT3G46530.1
Solyc07g045090	SL3.0ch07	58331758	58333758	+	7991	8516	8118	7698	48.41	51.328	2.918	1.64935e-07	3.78911	5.67495	3.12498e-06	0.00112903	Yes	meth_hyper_RNA_up	NADP-dependent alkenal double bond reductase P1	GO:0055114	oxidation-reduction process	NP_001309000.1	AT5G16970.1
Solyc07g049550	SL3.0ch07	59972706	59974706	+	4469	9034	4378	7756	33.096	36.08	2.98409	5.21463e-07	2.5173	7.16291	0.000108817	0.0202717	Yes	meth_hyper_RNA_up	1-aminocyclopropane-1-carboxylate oxidase 1	GO:0016491|GO:0055114	oxidoreductase activity | oxidation-reduction process	NP_001233928.1	AT1G05010.1
Solyc07g052040	SL3.0ch07	60701968	60703968	+	1436	2569	2526	4108	35.855	38.077	2.22139	0.0114152	7.03727	-1.79634	0.000169487	0.0278083		meth_hyper_RNA_up	Tubulin beta chain	GO:0005874|GO:0007017	microtubule | microtubule-based process	XP_004249594.1	AT1G75780.1
Solyc07g052100	SL3.0ch07	60766872	60768872	+	4590	4352	7742	6873	51.331	52.973	1.64217	0.00748937	7.02717	0.171064	1.04246e-06	0.000460228		meth_hyper_RNA_up	SNF2 domain-containing protein	GO:0046872	metal ion binding	XP_010323837.1	AT1G05120.1
Solyc07g056040	SL3.0ch07	64070753	64072753	-	3571	8023	3771	6978	30.8	35.082	4.28192	1.65695e-11	2.13525	4.38894	4.99886e-08	2.97999e-05		meth_hyper_RNA_up	CASP-like protein	0	0	XP_004243226.1	AT1G17200.1
Solyc07g056170	SL3.0ch07	64187148	64189148	-	7479	10781	6659	8898	40.958	42.804	1.8455	0.000392925	3.76266	4.42995	3.70516e-05	0.00911571		meth_hyper_RNA_up	Subtilisin-like protease family protein	GO:0004252|GO:0006508	serine-type endopeptidase activity | proteolysis	XP_004243217.1	AT2G04160.1
Solyc08g005630	SL3.0ch08	495728	497728	-	7459	6953	6739	5632	51.755	54.474	2.71869	7.71334e-06	6.39472	8.80712	1.29312e-13	1.5949e-10	Yes	meth_hyper_RNA_up	Long-chain-alcohol oxidase	GO:0046577|GO:0055114	long-chain-alcohol oxidase activity | oxidation-reduction process	NP_001317921.1	AT4G19380.1
Solyc08g005770	SL3.0ch08	600357	602357	+	4197	11167	3973	10034	27.317	28.364	1.04728	0.0217519	3.59116	9.13936	2.13924e-06	0.000822757	Yes	meth_hyper_RNA_up	alcohol acyl transferase	GO:0016747	transferase activity, transferring acyl groups other than amino-acyl groups	NP_001234496.1	AT5G17540.1
Solyc08g008550	SL3.0ch08	2938184	2940184	-	6245	7298	5807	6231	46.112	48.239	2.12653	0.000433077	1.40212	5.40847	1.79412e-06	0.000713022		meth_hyper_RNA_up	Kinase	GO:0005524	ATP binding	XP_004244653.1	AT4G10730.1
Solyc08g062220	SL3.0ch08	50830314	50832314	-	4771	10972	4835	10346	30.306	31.849	1.54349	0.00197891	5.94255	3.1338	1.27567e-08	8.29606e-06		meth_hyper_RNA_up	Glycosyltransferase	GO:0008152|GO:0016758	metabolic process | transferase activity, transferring hexosyl groups	XP_004245060.1	AT2G43820.1
Solyc08g074940	SL3.0ch08	59193141	59195141	-	1287	8359	1747	7904	13.342	18.102	4.75943	3.06787e-19	2.62002	4.38827	0.000251414	0.0376259		meth_hyper_RNA_up	Eukaryotic aspartyl protease family protein	GO:0004190|GO:0006508	aspartic-type endopeptidase activity | proteolysis	XP_004246049.1	AT1G64830.1
Solyc08g078450	SL3.0ch08	62377262	62379262	-	5913	10081	5988	8765	36.97	40.588	3.61824	1.14507e-10	6.85939	1.35045	6.44911e-05	0.0139048	Yes	meth_hyper_RNA_up	Exostosin family protein	0	0	XP_025888194.1	AT4G16745.2
Solyc08g081350	SL3.0ch08	64541882	64543882	-	7350	8607	7341	6641	46.061	52.503	6.44193	5.45741e-28	7.5526	-0.792094	1.11473e-05	0.00325273		meth_hyper_RNA_up	LOW QUALITY:Zinc finger protein CONSTANS-LIKE 3	GO:0005515	protein binding	XP_004245581.1	AT1G63820.1
Solyc09g014740	SL3.0ch09	6817140	6819140	-	1859	2430	4632	4750	43.343	49.371	6.0277	8.34593e-11	6.10227	-0.99517	4.98488e-08	2.97999e-05		meth_hyper_RNA_up	Kinase, putative	GO:0030247	polysaccharide binding	XP_010325784.1	AT1G21270.1
Solyc09g014860	SL3.0ch09	7065069	7067069	-	305	736	4277	5436	29.299	44.034	14.735	5.36119e-20	6.61722	-0.180923	3.77272e-06	0.00132297		meth_hyper_RNA_up	LURP-one-like protein	0	0	XP_004246313.1	AT5G01750.2
Solyc09g015490	SL3.0ch09	9227504	9229504	-	20	211	5813	8102	8.658	41.775	33.1171	7.09298e-28	4.0689	2.93404	4.21859e-16	6.85866e-13		meth_hyper_RNA_up	Phosphoenolpyruvate carboxylase	GO:0006099|GO:0008964|GO:0015977	tricarboxylic acid cycle | phosphoenolpyruvate carboxylase activity | carbon fixation	XP_004236950.1	AT1G68750.1
Solyc09g018170	SL3.0ch09	13397645	13399645	+	38	2078	3057	6545	1.796	31.837	30.0413	1.30627e-245	3.04884	0.995068	0.0001408	0.0241371		meth_hyper_RNA_up	MAP kinase kinase kinase 70	GO:0004672|GO:0006468	protein kinase activity | protein phosphorylation	XP_004246271.1	AT3G51630.1
Solyc09g018550	SL3.0ch09	15239697	15241697	-	542	1049	3700	5615	34.067	39.721	5.65426	1.44794e-05	2.79486	0.344163	9.87402e-05	0.0189878		meth_hyper_RNA_up	LOW QUALITY:RNA-binding (RRM/RBD/RNP motifs) family protein	0	0	XP_025886939.1	0
Solyc09g018840	SL3.0ch09	17576801	17578801	+	2344	862	4874	1377	73.113	77.972	4.85861	1.87513e-07	10.3444	1.78803	9.34278e-21	2.22782e-17		meth_hyper_RNA_up	MLO-like protein	GO:0006952|GO:0016021	defense response | integral component of membrane	NP_001335375.1	AT4G02600.1
Solyc09g018955	SL3.0ch09	17764283	17766283	-	1178	2163	5036	8628	35.259	36.856	1.59707	0.0393668	8.019	4.92	6.23603e-52	1.11525e-47		meth_hyper_RNA_up	DnaJ domain protein	0	0	XP_010325724.1	0
Solyc09g018960	SL3.0ch09	17768013	17770013	-	690	1749	4367	7435	28.29	37.002	8.71192	2.83813e-16	10.7122	1.7666	1.92792e-12	2.08964e-09		meth_hyper_RNA_up	Chaperone DnaJ-domain superfamily protein	0	0	XP_010325724.1	AT4G12780.1
Solyc09g042230	SL3.0ch09	22852822	22854822	+	562	1732	4970	9305	24.499	34.816	10.3174	1.25518e-22	7.19669	-0.042995	1.09777e-05	0.00324505		meth_hyper_RNA_up	LOW QUALITY:AIG2-like (avirulence induced gene) family protein	0	0	XP_004245532.1	0
Solyc09g042785	SL3.0ch09	25830809	25832809	+	547	1345	4310	4331	28.911	49.878	20.9673	4.32501e-62	10.7874	2.57793	1.57082e-29	7.02312e-26		meth_hyper_RNA_up	DNA gyrase subunit A, chloroplastic/mitochondrial	0	0	XP_004232503.1	0
Solyc09g031875	SL3.0ch09	27875992	27877992	+	920	2678	5920	7094	25.57	45.489	19.9197	4.27496e-105	7.11887	-1.43917	0.000335189	0.0470158		meth_hyper_RNA_up	Cytochrome P450	GO:0005506|GO:0016705|GO:0020037|GO:0055114	iron ion binding | oxidoreductase activity, acting on paired donors, with incorporation or reduction of molecular oxygen | heme binding | oxidation-reduction process	XP_004242874.1	0
Solyc09g031520	SL3.0ch09	30765978	30767978	-	17	148	1654	4868	10.303	25.36	15.0573	2.28288e-06	6.0135	-1.80566	0.000195901	0.0315232		meth_hyper_RNA_up	LOW QUALITY:Phosphoglycerate mutase family protein	0	0	0	0
Solyc09g031523	SL3.0ch09	30817862	30819862	-	27	410	1890	3833	6.178	33.025	26.8461	1.34601e-38	7.20046	-0.44284	9.25697e-08	5.17349e-05		meth_hyper_RNA_up	P-loop containing nucleoside triphosphate hydrolases superfamily protein	0	0	XP_010320708.1	0
Solyc09g047930	SL3.0ch09	33949710	33951710	+	334	1847	3263	8035	15.314	28.881	13.5671	1.02062e-41	2.20941	2.27222	0.00011414	0.0211532		meth_hyper_RNA_up	maternal effect embryo arrest protein	0	0	XP_019071347.1	AT3G07510.1
Solyc09g056270	SL3.0ch09	48759430	48761430	+	169	155	8445	5705	52.16	59.682	7.52148	0.00387772	7.02937	2.37857	1.42085e-27	4.6201e-24		meth_hyper_RNA_up	Chlorophyllide a oxygenase, chloroplastic	0	0	XP_004250311.1	0
Solyc09g057875	SL3.0ch09	51795712	51797712	-	366	4250	2185	8757	7.929	19.969	12.04	7.58357e-84	1.42242	2.59856	0.000333436	0.0469542		meth_hyper_RNA_up	Far-red impaired responsive (FAR1) family protein	GO:0006355	regulation of transcription, DNA-templated	XP_004247048.1	0
Solyc09g059280	SL3.0ch09	54394896	54396896	+	18	713	2032	2635	2.462	43.54	41.0774	1.43227e-131	3.51264	0.768287	1.11275e-07	5.9404e-05		meth_hyper_RNA_up	Histone H3	GO:0046982	protein heterodimerization activity	XP_010324306.1	AT5G65360.1
Solyc09g059400	SL3.0ch09	54617240	54619240	+	706	1063	5209	5438	39.91	48.925	9.01503	2.97971e-12	5.97037	1.6217	3.45145e-15	4.93807e-12		meth_hyper_RNA_up	CCCH-type zinc fingerfamily protein with RNA-binding domain-containing protein	0	0	XP_019071232.1	0
Solyc09g059650	SL3.0ch09	55245581	55247581	-	183	669	4942	9015	21.479	35.409	13.9299	2.39754e-17	4.46808	3.75064	8.12736e-14	1.03821e-10	Yes	meth_hyper_RNA_up	Vacuolar iron transporter family protein	0	0	XP_004230639.1	0
Solyc09g060070	SL3.0ch09	57742246	57744246	+	180	440	1903	2731	29.032	41.066	12.0338	6.63386e-09	7.44402	-1.26283	8.31335e-06	0.00258944		meth_hyper_RNA_up	RAP release 2, galactose-binding-like domain protein, putative (DUF1997)	0	0	XP_004252515.1	0
Solyc09g082460	SL3.0ch09	68604207	68606207	-	3888	10126	4356	8857	27.744	32.968	5.22385	2.40138e-20	3.31039	6.78241	1.25156e-05	0.00361014	Yes	meth_hyper_RNA_up	Homocysteine S-methyltransferase	0	0	XP_019070998.1	AT3G22740.1
Solyc09g082810	SL3.0ch09	68901773	68903773	+	3264	6979	3132	5736	31.866	35.318	3.45233	4.52848e-07	1.94786	3.90633	9.2297e-05	0.017979		meth_hyper_RNA_up	Glycine-rich protein	0	0	NP_001292912.1	0
Solyc09g092310	SL3.0ch09	71922792	71924792	-	664	1526	4191	7971	30.32	34.46	4.14016	0.000110979	3.07606	2.72451	1.0551e-06	0.000460228		meth_hyper_RNA_up	Ph-3 resistance protein	GO:0043531	ADP binding	XP_004247881.1	AT3G46530.1
Solyc09g092500	SL3.0ch09	72042886	72044886	+	3472	12353	3627	10980	21.94	24.831	2.89059	3.4996e-09	1.53662	8.80938	8.16067e-05	0.0163067		meth_hyper_RNA_up	Glycosyltransferase	GO:0008152|GO:0016758	metabolic process | transferase activity, transferring hexosyl groups	NP_001348274.1	AT4G14090.1
Solyc09g098080	SL3.0ch09	72481606	72483606	+	4805	8565	4905	7530	35.939	39.445	3.50645	7.97703e-09	9.84282	0.717231	0.000235581	0.0366359	Yes	meth_hyper_RNA_up	Glycosyltransferase	GO:0008152|GO:0016758	metabolic process | transferase activity, transferring hexosyl groups	XP_004248013.1	AT3G21760.1
Solyc10g048060	SL3.0ch10	43821170	43823170	-	8398	150627	8547	96148	5.281	8.164	2.88278	1.06113e-185	4.01986	3.08234	5.50956e-05	0.012552	Yes	meth_hyper_RNA_up	myosin XI D	0	0	XP_004242175.1	ATMG00030.1
Solyc10g075150	SL3.0ch10	58933070	58935070	-	3407	7451	2451	4978	31.378	32.992	1.61454	0.0110267	8.15981	6.62904	1.17309e-06	0.000499513		meth_hyper_RNA_up	Non-specific lipid-transfer protein	GO:0006869|GO:0008289	lipid transport | lipid binding	XP_004249051.1	AT3G51590.1
Solyc10g079570	SL3.0ch10	61209616	61211616	+	9701	8179	8658	5879	54.256	59.558	5.30222	3.49417e-21	8.71878	4.38628	4.22549e-10	3.59851e-07		meth_hyper_RNA_up	HXXXD-type acyl-transferase family protein	GO:0016747	transferase activity, transferring acyl groups other than amino-acyl groups	XP_025883713.1	AT3G26040.1
Solyc10g079860	SL3.0ch10	61459707	61461707	-	2413	5961	2047	4347	28.815	32.014	3.19901	2.29318e-05	7.86659	4.87018	2.9095e-06	0.00106191	Yes	meth_hyper_RNA_up	LEQB L.esculentum TomQ'b beta(1,3)glucanase	GO:0005975	carbohydrate metabolic process	NP_001234158.2	AT3G57270.1
Solyc10g083580	SL3.0ch10	63488601	63490601	+	3313	10256	3203	9063	24.416	26.113	1.69688	0.00106348	1.60186	7.70155	2.71429e-06	0.00100087	Yes	meth_hyper_RNA_up	Phytosulfokine 3, putative	GO:0005576|GO:0008083|GO:0008283	extracellular region | growth factor activity | cell population proliferation	NP_001333918.1	AT3G44735.1
Solyc10g084880	SL3.0ch10	64381421	64383421	-	5729	8486	6127	6555	40.302	48.313	8.01007	8.57881e-39	2.34255	6.92558	2.46522e-05	0.00648352		meth_hyper_RNA_up	LOW QUALITY:Avr9/Cf-9 rapidly elicited protein 137	0	0	NP_001234706.2	AT3G23160.1
Solyc11g017373	SL3.0ch11	8279971	8281971	-	3042	7311	3296	5669	29.383	36.765	7.38241	7.20313e-27	9.62293	-0.153897	5.87287e-15	8.07927e-12		meth_hyper_RNA_up	Serine/threonine protein phosphatase 7 long form isogeny	0	0	XP_025887697.1	0
Solyc11g045150	SL3.0ch11	31816915	31818915	-	1737	21931	1635	14098	7.339	10.392	3.05315	3.26329e-25	4.14852	2.00598	4.07385e-05	0.0098455	Yes	meth_hyper_RNA_up	myosin XI D	0	0	XP_004242175.1	ATMG00030.1
Solyc12g017250	SL3.0ch12	6435381	6437381	+	7638	5682	7769	5088	57.342	60.426	3.08388	4.06882e-07	2.12102	7.73502	0.000135196	0.0237043		meth_hyper_RNA_up	Photosystem II 10 kDa polypeptide family protein	GO:0009523|GO:0009654|GO:0015979|GO:0042651	photosystem II | photosystem II oxygen evolving complex | photosynthesis | thylakoid membrane	XP_004251952.1	AT1G79040.1
Solyc12g035223	SL3.0ch12	39424798	39426798	+	2545	5672	4163	5521	30.972	42.988	12.0161	1.60494e-60	10.5541	0.668115	1.15602e-18	2.29714e-15		meth_hyper_RNA_up	Cytochrome b561 and DOMON domain-containing protein At5g35735	0	0	XP_004237881.1	0
Solyc12g088680	SL3.0ch12	64942191	64944191	+	4227	7699	4730	8073	35.444	36.944	1.5009	0.00743122	1.69844	3.27476	0.000117085	0.0214763		meth_hyper_RNA_up	Ubiquitin-conjugating enzyme	0	0	XP_004252754.1	AT3G57870.1
Solyc01g008940	SL3.0ch01	2890927	2892927	+	1124	3914	688	3394	22.31	16.854	-5.45596	1.17726e-10	-5.26675	-2.67371	0.000290427	0.0422275		meth_hypo_RNA_down	LOW QUALITY:ATPase E1-E2 type family protein / haloacid dehalogenase-like hydrolase family protein	0	0	XP_010326006.2	0
Solyc01g058210	SL3.0ch01	65559641	65561641	-	2198	6158	1956	5850	26.304	25.058	-1.2468	0.032538	-7.1456	-1.41099	1.30757e-06	0.000543829		meth_hypo_RNA_down	HCO3- transporter family	0	0	XP_004245187.1	AT3G57410.1
Solyc01g080680	SL3.0ch01	79778937	79780937	+	2743	10001	1986	7699	21.524	20.506	-1.01792	0.0294349	-2.85919	4.51473	0.000340084	0.0473463		meth_hypo_RNA_down	Sugar facilitator protein 3	GO:0016021|GO:0022857|GO:0055085	integral component of membrane | transmembrane transporter activity | transmembrane transport	XP_004229493.1	AT5G18840.1
Solyc03g005760	SL3.0ch03	539003	541003	-	1074	6274	841	6293	14.616	11.789	-2.8276	5.31851e-07	-3.07864	8.15367	6.83995e-07	0.000313655		meth_hypo_RNA_down	chlorophyll a/b-binding protein	GO:0009765|GO:0016020	photosynthesis, light harvesting | membrane	XP_010317413.1	AT1G29930.1
Solyc03g005770	SL3.0ch03	538878	540878	+	1078	6351	834	5983	14.511	12.234	-2.27658	5.46398e-05	-3.20441	4.08491	2.77784e-05	0.0072524		meth_hypo_RNA_down	chlorophyll a/b-binding protein	GO:0009765|GO:0016020	photosynthesis, light harvesting | membrane	NP_001316911.1	AT1G29930.1
Solyc03g006110	SL3.0ch03	777112	779112	-	3398	9756	3152	9658	25.832	24.606	-1.22667	0.0115407	-4.72264	-0.203654	4.78534e-05	0.0111144		meth_hypo_RNA_down	Non-specific serine/threonine protein kinase	GO:0007165	signal transduction	XP_004234086.1	AT5G45820.1
Solyc03g083770	SL3.0ch03	55131320	55133320	+	4138	7446	3272	6998	35.722	31.86	-3.8619	2.31436e-09	-2.50129	1.96268	0.000136982	0.0239004		meth_hypo_RNA_down	Plant invertase/pectin methylesterase inhibitor superfamily protein	GO:0004857	enzyme inhibitor activity	XP_004234934.1	AT5G62360.1
Solyc03g115870	SL3.0ch03	66951811	66953811	+	527	2945	238	2263	15.179	9.516	-5.66238	9.40752e-11	-1.75565	4.35115	0.000103836	0.019445		meth_hypo_RNA_down	Thioredoxin	GO:0045454	cell redox homeostasis	XP_004236024.1	AT5G61440.1
Solyc03g117675	SL3.0ch03	68238896	68240896	-	609	9033	381	7813	6.316	4.65	-1.66637	1.08486e-06	-1.63722	5.90329	0.000159219	0.0264881		meth_hypo_RNA_down	ATP-dependent DNA helicase	0	0	XP_004235885.1	0
Solyc05g014580	SL3.0ch05	8444290	8446290	+	6753	6300	4483	5066	51.735	46.947	-4.78791	1.98779e-12	-6.14298	-1.64726	6.42335e-05	0.0139048		meth_hypo_RNA_down	LOW QUALITY:FER-like regulator of iron uptake	0	0	XP_025887554.1	0
Solyc06g009190	SL3.0ch06	3126764	3128764	+	7894	11293	6799	10094	41.142	40.247	-0.895	0.0382887	-3.03831	4.61628	2.3424e-06	0.000881926		meth_hypo_RNA_down	Pectinesterase	GO:0005618|GO:0030599|GO:0042545	cell wall | pectinesterase activity | cell wall modification	XP_010321856.1	AT4G02320.1
Solyc06g009890	SL3.0ch06	4233377	4235377	-	6627	10420	3913	8471	38.875	31.597	-7.27765	5.10823e-37	-5.04189	1.01734	3.98704e-08	2.45877e-05		meth_hypo_RNA_down	PHD finger family protein	0	0	XP_010313748.1	0
Solyc06g068435	SL3.0ch06	42502673	42504673	+	5151	4539	2444	2786	53.158	46.73	-6.42749	1.38007e-13	-2.19454	2.1578	7.36298e-06	0.00235142		meth_hypo_RNA_down	Sister chromatid cohesion protein PDS5 like B-B	0	0	XP_025887402.1	0
Solyc06g074390	SL3.0ch06	46154976	46156976	+	2961	10093	2665	10106	22.683	20.868	-1.81511	0.000277903	-4.48117	-0.018724	4.62833e-05	0.0108388		meth_hypo_RNA_down	Fatty acyl-CoA reductase	GO:0080019	fatty-acyl-CoA reductase (alcohol-forming) activity	XP_004241314.1	AT4G33790.1
Solyc07g063610	SL3.0ch07	66174036	66176036	-	2422	7888	2182	7901	23.492	21.64	-1.85137	0.000989717	-1.78405	4.40603	0.000124552	0.0223868		meth_hypo_RNA_down	Dynein light chain family protein	GO:0007017|GO:0030286	microtubule-based process | dynein complex	XP_004244185.1	AT4G27360.1
Solyc07g064210	SL3.0ch07	66578122	66580122	+	1307	4545	1244	4713	22.334	20.883	-1.45125	0.026555	-3.0361	1.62614	2.01112e-05	0.00544954		meth_hypo_RNA_down	LOW QUALITY:Grain softness protein	0	0	XP_004244148.1	AT4G27170.1
Solyc08g006490	SL3.0ch08	1080344	1082344	+	3840	6690	3304	7213	36.467	31.416	-5.05143	2.20554e-14	-5.03535	-2.66292	0.000267852	0.039589	Yes	meth_hypo_RNA_down	transcriptional factor B3 family protein	GO:0003677	DNA binding	XP_019070638.1	AT4G31690.1
Solyc09g011080	SL3.0ch09	4416638	4418638	-	2259	10003	1367	7365	18.423	15.655	-2.76771	1.62868e-07	-1.45603	3.67615	4.48095e-05	0.0106142		meth_hypo_RNA_down	Ribulose bisphosphate carboxylase/oxygenase activase	GO:0005524	ATP binding	XP_010325843.1	AT2G39730.1
Solyc09g047920	SL3.0ch09	33888353	33890353	+	907	2683	1259	4831	25.265	20.673	-4.59139	2.00177e-07	-5.35483	2.01552	1.41988e-12	1.58707e-09		meth_hypo_RNA_down	Protein kinase	0	0	XP_004252831.1	AT5G66850.1
Solyc09g083100	SL3.0ch09	69206418	69208418	+	2475	8572	2292	8652	22.404	20.943	-1.46129	0.00475196	-2.95396	4.25883	2.58064e-08	1.61938e-05		meth_hypo_RNA_down	Non-specific serine/threonine protein kinase	GO:0007165	signal transduction	XP_004247630.1	AT3G23000.1
Solyc10g012210	SL3.0ch10	4613665	4615665	+	4097	5688	1485	3281	41.87	31.158	-10.712	3.36878e-35	-8.49443	-0.546276	1.91809e-10	1.80543e-07		meth_hypo_RNA_down	AT-rich interactive domain protein	0	0	XP_010326976.1	AT2G46040.1
Solyc12g038810	SL3.0ch12	51891462	51893462	+	5955	8047	3216	6659	42.53	32.567	-9.96255	7.15261e-54	-5.54187	1.28588	1.39243e-05	0.00395274		meth_hypo_RNA_down	Protein kinase	0	0	XP_010312865.1	AT4G38470.1
Solyc01g095080	SL3.0ch01	86331529	86333529	-	2645	7808	2040	6839	25.304	22.976	-2.32818	0.000121144	3.93952	8.53518	4.85826e-06	0.00163934		meth_hypo_RNA_up	1-aminocyclopropane-1-carboxylic acid synthase-2	GO:0009058|GO:0030170	biosynthetic process | pyridoxal phosphate binding	NP_001234178.2	AT1G01480.1
Solyc01g099850	SL3.0ch01	89863994	89865994	+	1219	8830	756	6349	12.131	10.64	-1.49017	0.00152719	3.74393	-1.49145	0.000217746	0.0345051	Yes	meth_hypo_RNA_up	Folate receptor-like protein	0	0	XP_004230254.1	AT5G27830.4
Solyc02g084890	SL3.0ch02	48590733	48592733	-	2373	2594	4256	6799	47.775	38.498	-9.2769	2.4045e-27	4.16529	6.12622	1.3483e-10	1.30341e-07		meth_hypo_RNA_up	NBS-LRR disease resistance protein NBS50	GO:0043531	ADP binding	XP_004232433.1	AT3G50950.2
Solyc02g089150	SL3.0ch02	51656942	51658942	+	3984	7881	3108	6477	33.578	32.426	-1.15208	0.0338873	2.17987	4.1823	3.68766e-06	0.00130594		meth_hypo_RNA_up	PI-PLC X domain-containing protein	GO:0006629|GO:0008081	lipid metabolic process | phosphoric diester hydrolase activity	XP_004232139.1	AT1G13680.1
Solyc03g095900	SL3.0ch03	59007170	59009170	+	6944	6411	5671	6512	51.996	46.548	-5.44704	9.51634e-18	4.96553	10.4677	2.61618e-14	3.46576e-11		meth_hypo_RNA_up	E8 protein homolog	GO:0016491|GO:0055114	oxidoreductase activity | oxidation-reduction process	NP_001233961.2	AT1G06620.1
Solyc03g111690	SL3.0ch03	63825403	63827403	+	2669	3308	2523	3535	44.655	41.647	-3.0071	0.000579538	2.66327	10.2999	5.06836e-06	0.00169425		meth_hypo_RNA_up	Pectate lyase family protein	0	0	NP_001351955.1	AT4G24780.1
Solyc03g118100	SL3.0ch03	68558587	68560587	-	130	2246	44	1152	5.471	3.679	-1.79245	0.0105169	3.12806	5.10339	0.000134663	0.0237043		meth_hypo_RNA_up	()-neomenthol dehydrogenase	0	0	XP_004235853.1	AT5G51030.1
Solyc07g052960	SL3.0ch07	61491971	61493971	+	3610	7355	2960	6946	32.923	29.881	-3.04206	2.16068e-06	1.91158	7.90061	2.91476e-05	0.00750036	Yes	meth_hypo_RNA_up	GRAS family TF	0	0	XP_004243434.1	AT3G49950.1
Solyc07g056700	SL3.0ch07	64634949	64636949	-	3526	4964	2856	4587	41.531	38.372	-3.15959	3.84831e-05	3.79686	4.07555	2.23051e-06	0.000848733		meth_hypo_RNA_up	LOW QUALITY:Armadillo/beta-catenin-like repeat family protein	0	0	XP_004244272.1	0
Solyc08g006470	SL3.0ch08	1064069	1066069	+	2046	6799	1678	6505	23.132	20.506	-2.62579	2.70622e-05	3.79715	3.94479	0.000119715	0.0217359		meth_hypo_RNA_up	Zinc finger protein	GO:0046872	metal ion binding	XP_004244493.1	AT4G31420.2
Solyc08g078460	SL3.0ch08	62380434	62382434	+	4196	11183	3261	9512	27.284	25.53	-1.75354	0.00058547	2.8816	5.99018	0.000145885	0.02473		meth_hypo_RNA_up	Oxidoreductase family protein	GO:0016491	oxidoreductase activity	XP_004245781.1	AT4G17370.1
Solyc09g030360	SL3.0ch09	32354473	32356473	-	69	71	2733	5293	49.286	34.052	-15.2339	0.000199953	11.4659	2.67105	1.29162e-32	7.6998e-29		meth_hypo_RNA_up	LOW QUALITY:Thiamine biosynthetic bifunctional enzyme TH1, chloroplastic	0	0	XP_010326791.1	0
Solyc09g057650	SL3.0ch09	50311890	50313890	-	352	325	6104	7506	51.994	44.849	-7.14472	0.000211069	2.27226	5.37886	1.05556e-09	8.2077e-07		meth_hypo_RNA_up	40S ribosomal protein S8	GO:0003735|GO:0005622|GO:0005840|GO:0006412	structural constituent of ribosome | intracellular | ribosome | translation	XP_004247043.1	AT5G59240.1
Solyc09g092300	SL3.0ch09	71912233	71914233	-	236	104	5732	6344	69.412	47.466	-21.9457	2.03216e-15	5.01339	1.56378	2.06564e-13	2.4628e-10	Yes	meth_hypo_RNA_up	Ph-3 resistance protein	GO:0043531	ADP binding	XP_004247880.1	AT3G46530.1
Solyc10g006880	SL3.0ch10	1301926	1303926	-	3561	12040	2586	9515	22.825	21.37	-1.45533	0.00222611	2.32792	8.00461	1.03848e-05	0.00309535		meth_hypo_RNA_up	Non-ripening (nor) NAC domain protein	GO:0003677|GO:0006355	DNA binding | regulation of transcription, DNA-templated	NP_001234652.1	AT3G15510.1
Solyc10g078600	SL3.0ch10	60502369	60504369	-	992	4188	701	3417	19.151	17.023	-2.12775	0.00467976	4.51436	3.89999	6.51224e-16	1.01274e-12		meth_hypo_RNA_up	Inorganic phosphate transporter 1-1	0	0	XP_010314629.1	AT1G19715.3
Solyc12g035225	SL3.0ch12	39428378	39430378	+	704	2949	522	2446	19.272	17.588	-1.68423	0.0360339	12.3739	2.6285	2.27805e-35	2.03704e-31		meth_hypo_RNA_up	BED zinc finger,hAT family dimerization domain, putative	GO:0046983	protein dimerization activity	XP_010314162.1	0
Solyc12g096310	SL3.0ch12	66266561	66268561	+	4296	12839	3628	11511	25.071	23.965	-1.1069	0.0109587	3.39234	7.34904	3.6158e-09	2.53588e-06		meth_hypo_RNA_up	plant/protein (Protein of unknown function, DUF599)	0	0	XP_004253068.1	AT4G31330.1
Solyc12g100260	SL3.0ch12	68017980	68019980	+	56	1271	40	1461	4.22	2.665	-1.55516	0.0139939	7.74999	3.59491	0.000248138	0.0376076		meth_hypo_RNA_up	Fatty acid desaturase	0	0	XP_019067122.1	AT3G12120.1

## Sheet: PHYA_DMP_DE_BK_All
Supplementary Table 17. DMPs in all mC contexts associated with DEGs
Gene_ID	chr	from	to	strand	met_WT	unmet_WT	met_PHYA	unmet_PHYA	X.met_WT	X.met_PHYA	X.diff_PHYA.WT	FDR_diff_PHYA.WT	logFC_PHYA	logCPM_PHYA	PValue_PHYA	padj_PHYA	sRNA_clusters	Correlation	Description	GO_Term	GO_name	NCBI	A._thaliana_ortholog
Solyc00g010750	SL3.0ch00	8954513	8956513	-	1854	4114	2075	4160	31.066	33.28	2.21419	0.00556994	-6.49581	-2.19298	0.000377759	0.0112316	No	meth_hyper_RNA_down	Guanylate-binding family protein	GO:0003924|GO:0005525	GTPase activity | GTP binding	XP_025884064.1	AT5G46070.1
Solyc00g273110	SL3.0ch00	19695510	19697510	-	2339	5495	3195	6172	29.857	34.109	4.25207	4.76401e-09	-1.20235	3.6641	0.00263425	0.0493051	No	meth_hyper_RNA_down	DNA ligase 4	0	0	XP_019070466.1	0
Solyc01g008350	SL3.0ch01	2405142	2407142	+	2384	3328	3509	4587	41.737	43.342	1.6057	0.0320541	-2.94551	-0.149113	0.000225598	0.00752021	Yes	meth_hyper_RNA_down	LOW QUALITY:DNAJ heat shock N-terminal domain-containing protein	0	0	XP_010312844.1	AT1G65280.1
Solyc01g008420	SL3.0ch01	2437381	2439381	+	4863	11039	6389	12559	30.581	33.719	3.13754	8.91154e-10	-1.79986	2.91831	0.000216457	0.00727654	No	meth_hyper_RNA_down	Protein DETOXIFICATION	GO:0006855|GO:0015238|GO:0015297|GO:0016020|GO:0055085	drug transmembrane transport | antiporter activity | membrane | transmembrane transport	XP_010315164.1	AT1G51340.2
Solyc01g010160	SL3.0ch01	4885380	4887380	-	5283	5023	5422	4719	51.261	53.466	2.20473	0.00117593	-2.36211	1.27981	0.00107087	0.0248237	No	meth_hyper_RNA_down	Beta-glucosidase, putative	GO:0005975	carbohydrate metabolic process	XP_004228406.1	AT1G26560.1
Solyc01g010190	SL3.0ch01	4918301	4920301	+	11095	9903	13276	10476	52.838	55.894	3.05587	1.99554e-10	-1.46156	5.22372	6.16694e-05	0.00275355	Yes	meth_hyper_RNA_down	LOW QUALITY:Retrovirus-related Pol polyprotein from transposon TNT 1-94	0	0	XP_004228418.1	AT5G48050.1
Solyc01g016460	SL3.0ch01	19931727	19933727	-	30	1078	3137	5517	2.708	36.249	33.5416	4.67654e-150	-6.10599	-0.617724	9.78279e-05	0.00387928	No	meth_hyper_RNA_down	Phototropic-responsive NPH3 family protein	0	0	0	0
Solyc01g017600	SL3.0ch01	24249508	24251508	-	857	7010	1289	8485	10.894	13.188	2.29444	4.04429e-06	-7.96826	-1.78734	3.58615e-05	0.00180407	No	meth_hyper_RNA_down	Transmembrane protein 45B	0	0	XP_004228340.1	AT1G55230.1
Solyc01g058210	SL3.0ch01	65559641	65561641	-	1404	4101	1987	5295	25.504	27.286	1.78237	0.0141063	-8.15285	-1.41099	7.90556e-09	1.99131e-06	No	meth_hyper_RNA_down	HCO3- transporter family	0	0	XP_004245187.1	AT3G57410.1
Solyc01g066613	SL3.0ch01	74534052	74536052	+	10353	17576	12054	19269	37.069	38.483	1.41391	0.000323817	-4.7932	2.2714	5.81485e-16	7.99945e-13	No	meth_hyper_RNA_down	Guanylate-binding family protein	GO:0003924|GO:0005525	GTPase activity | GTP binding	XP_025886291.1	0
Solyc01g089950	SL3.0ch01	83523197	83525197	+	7817	8465	10334	10662	48.01	49.219	1.20883	0.0121367	-1.9095	1.97119	0.000421453	0.0122527	Yes	meth_hyper_RNA_down	F-box family protein	GO:0005515	protein binding	XP_004246506.1	0
Solyc01g090890	SL3.0ch01	84468110	84470110	+	2810	7993	2922	7835	26.011	27.164	1.15241	0.0293907	-3.99152	0.894633	0.00021445	0.00721586	No	meth_hyper_RNA_down	SPX domain-containing protein	GO:0016036	cellular response to phosphate starvation	XP_004229786.1	AT2G45130.1
Solyc01g091520	SL3.0ch01	85017468	85019468	+	5795	6102	6693	6319	48.71	51.437	2.72738	1.83103e-05	-1.38505	6.02978	0.000271758	0.00876726	No	meth_hyper_RNA_down	Enoyl-CoA hydratase/isomerase family protein	GO:0003824|GO:0008152	catalytic activity | metabolic process	XP_004229827.1	AT1G65520.1
Solyc01g099580	SL3.0ch01	89654268	89656268	-	1858	3560	2052	3455	34.293	37.262	2.96857	0.000904173	-2.13196	2.10956	1.63276e-05	0.000973344	No	meth_hyper_RNA_down	Cysteine/Histidine-rich C1 domain family protein, putative	0	0	XP_019068348.1	AT1G47980.1
Solyc01g100450	SL3.0ch01	90350683	90352683	+	4020	6909	4891	6703	36.783	42.186	5.40274	4.55917e-16	-1.80514	1.01447	0.00171943	0.0360075	No	meth_hyper_RNA_down	Pentatricopeptide repeat-containing protein	GO:0005515	protein binding	XP_010313517.1	AT1G09820.1
Solyc01g103530	SL3.0ch01	91998444	92000444	+	1960	6885	2035	6399	22.159	24.129	1.96912	0.0016043	-1.9011	2.45623	0.000724881	0.0185462	No	meth_hyper_RNA_down	Non-specific serine/threonine protein kinase	GO:0005515	protein binding	XP_004230451.1	AT4G20270.1
Solyc01g104160	SL3.0ch01	92525678	92527678	-	196	4502	313	4730	4.172	6.207	2.03463	6.75932e-06	-0.821265	6.16204	0.00205503	0.041018	Yes	meth_hyper_RNA_down	arginine/glutamate-rich 1 protein	0	0	XP_025883548.1	AT1G10890.1
Solyc01g105330	SL3.0ch01	93429947	93431947	-	3874	7458	4950	7917	34.186	38.471	4.28413	1.22005e-11	-1.1849	3.75136	0.00256175	0.0481749	No	meth_hyper_RNA_down	Methyl-CpG-binding domain-containing protein 8	GO:0046872	metal ion binding	XP_010315113.1	AT1G22310.2
Solyc01g108720	SL3.0ch01	95849332	95851332	-	21	685	19	358	2.975	5.04	2.06528	0.0461396	-2.71202	0.0689741	0.00235775	0.0451923	No	meth_hyper_RNA_down	methyl esterase 4	0	0	XP_025884376.1	0
Solyc01g108730	SL3.0ch01	95850075	95852075	-	19	677	28	316	2.73	8.14	5.40965	0.000156388	-2.3356	1.46632	0.000444091	0.0127482	No	meth_hyper_RNA_down	methyl esterase 1	0	0	XP_010315273.1	AT2G23620.1
Solyc01g111145	SL3.0ch01	97431462	97433462	+	1535	3629	1478	3215	29.725	31.494	1.76869	0.0311782	-3.45528	6.45411	0.000434056	0.0125103	No	meth_hyper_RNA_down	Proline-rich protein	0	0	XP_004230916.1	0
Solyc01g111270	SL3.0ch01	97492717	97494717	+	3342	3141	4366	3607	51.55	54.76	3.20961	0.000108909	-1.46155	5.43347	0.000872634	0.0212185	Yes	meth_hyper_RNA_down	Armadillo repeat only protein	GO:0005515	protein binding	XP_025884648.1	AT4G34940.1
Solyc02g014847	SL3.0ch02	19206970	19208970	+	2486	5381	2209	4377	31.6	33.541	1.94049	0.00797217	-7.18259	-1.54746	0.00084119	0.0205966	No	meth_hyper_RNA_down	Replication protein A 70 kDa DNA-binding subunit B	0	0	XP_025888385.1	0
Solyc02g023930	SL3.0ch02	25015051	25017051	+	92512	28229	208065	31685	76.62	86.784	10.1639	0	-7.40283	-2.26339	4.72607e-06	0.000359664	No	meth_hyper_RNA_down	LOW QUALITY:Leucine-rich repeat protein kinase family protein	0	0	XP_004244234.1	0
Solyc02g037595	SL3.0ch02	31688981	31690981	+	3388	6428	3808	6085	34.515	38.492	3.97679	1.20021e-08	-6.08648	-2.72281	0.00265714	0.0496815	No	meth_hyper_RNA_down	Guanylate-binding family protein	GO:0003735|GO:0005840|GO:0006412	structural constituent of ribosome | ribosome | translation	XP_025886291.1	0
Solyc02g063180	SL3.0ch02	35791782	35793782	-	1266	4497	1791	4893	21.968	26.795	4.82761	8.2743e-10	-6.00976	-0.611498	0.000145489	0.00533728	No	meth_hyper_RNA_down	UDP-N-acetylenolpyruvoylglucosamine reductase	GO:0050660	flavin adenine dinucleotide binding	XP_004233965.2	0
Solyc02g072370	SL3.0ch02	42178751	42180751	-	0	246	9	131	0	6.429	6.42857	8.25202e-05	-2.73121	1.99568	0.000107941	0.00418196	No	meth_hyper_RNA_down	Subtilisin-like protease	GO:0004252|GO:0006508	serine-type endopeptidase activity | proteolysis	XP_019067824.1	AT1G04110.1
Solyc02g079260	SL3.0ch02	44426676	44428676	-	1009	2408	1464	2703	29.529	35.133	5.60436	3.15349e-07	-1.92774	1.10222	0.00106394	0.0246949	Yes	meth_hyper_RNA_down	Pentatricopeptide repeat-containing protein	GO:0008270	zinc ion binding	XP_025885194.1	AT4G13650.1
Solyc02g079490	SL3.0ch02	44579796	44581796	-	8184	8040	10407	8925	50.444	53.833	3.38924	4.0436e-10	-3.0306	3.63415	4.63834e-07	5.54177e-05	Yes	meth_hyper_RNA_down	HXXXD-type acyl-transferase family protein, putative	GO:0016747	transferase activity, transferring acyl groups other than amino-acyl groups	XP_004232772.1	AT1G32910.1
Solyc02g080510	SL3.0ch02	45272754	45274754	-	3064	9537	3276	9606	24.316	25.431	1.1153	0.0215769	-1.63233	7.18682	0.000344177	0.010477	Yes	meth_hyper_RNA_down	Senescence regulator	0	0	XP_004232713.1	AT1G11700.1
Solyc02g083250	SL3.0ch02	47262971	47264971	-	11423	8217	13838	9473	58.162	59.363	1.20062	0.00736691	-1.81482	6.51757	6.50237e-07	7.29696e-05	No	meth_hyper_RNA_down	Ganglioside-induced differentiation-associated protein 2	0	0	XP_004232536.1	AT4G35750.1
Solyc02g084810	SL3.0ch02	48545156	48547156	-	3224	6825	7425	12351	32.083	37.546	5.46272	5.65064e-20	-1.39838	4.60748	2.28222e-06	0.000199099	No	meth_hyper_RNA_down	AT4G36440-like protein	0	0	XP_010316391.1	AT4G36440.1
Solyc02g086600	SL3.0ch02	49902833	49904833	-	6756	9268	7447	9789	42.162	43.206	1.04432	0.0289316	-1.11909	4.05723	0.00108593	0.0250915	Yes	meth_hyper_RNA_down	polyribonucleotide nucleotidyltransferase	GO:0003723|GO:0004654|GO:0006402	RNA binding | polyribonucleotide nucleotidyltransferase activity | mRNA catabolic process	XP_010316293.1	AT5G14580.1
Solyc02g086970	SL3.0ch02	50178076	50180076	-	2466	2425	2853	2516	50.419	53.138	2.71925	0.00387467	-3.31846	7.45274	1.18359e-12	8.30088e-10	Yes	meth_hyper_RNA_down	Aldehyde dehydrogenase	GO:0008152|GO:0016491|GO:0055114	metabolic process | oxidoreductase activity | oxidation-reduction process	XP_010316283.1	AT1G23800.1
Solyc02g086980	SL3.0ch02	50181341	50183341	+	2207	5812	3732	6727	27.522	35.682	8.16005	4.78763e-31	-3.41207	0.955746	3.01782e-05	0.00158272	No	meth_hyper_RNA_down	LOW QUALITY:Trimeric LpxA-like enzymes superfamily protein	0	0	XP_004228809.1	0
Solyc02g089130	SL3.0ch02	51651059	51653059	-	2433	4734	3117	5048	33.947	38.175	4.22788	8.57903e-08	-1.65339	2.23909	0.00124251	0.0278808	Yes	meth_hyper_RNA_down	COBRA-like protein	GO:0010215|GO:0016049|GO:0031225	cellulose microfibril organization | cell growth | anchored component of membrane	XP_004232142.1	AT5G15630.1
Solyc02g089940	SL3.0ch02	52261143	52263143	+	2102	5045	2293	5089	29.411	31.062	1.6511	0.0176155	-1.97306	3.46418	3.68582e-05	0.00184126	No	meth_hyper_RNA_down	BIPINNATA	GO:0003677|GO:0006355	DNA binding | regulation of transcription, DNA-templated	XP_025885388.1	AT4G36870.1
Solyc03g005640	SL3.0ch03	455649	457649	+	3032	6633	3914	7202	31.371	35.211	3.83958	8.22826e-09	-4.17365	-1.83671	0.00257979	0.048442	No	meth_hyper_RNA_down	LOW QUALITY:transmembrane protein, putative (DUF247)	0	0	XP_010317509.1	AT3G50150.1
Solyc03g006120	SL3.0ch03	781372	783372	-	617	7406	913	8470	7.69	9.73	2.03997	2.63625e-06	-3.69707	-2.5107	0.00221391	0.0432767	No	meth_hyper_RNA_down	transcription factor-like protein	GO:0006351|GO:0043565	transcription, DNA-templated | sequence-specific DNA binding	XP_004234088.1	AT4G18690.1
Solyc03g006640	SL3.0ch03	1216095	1218095	+	2197	10049	2506	10456	17.941	19.333	1.39288	0.00308067	-1.42382	5.24868	0.000247982	0.00813745	No	meth_hyper_RNA_down	F-box family protein	GO:0005515	protein binding	XP_004234134.1	AT4G05010.1
Solyc03g044600	SL3.0ch03	10195581	10197581	+	6676	6816	9361	8440	49.481	52.587	3.10576	8.06102e-08	-1.77672	2.5113	0.00222644	0.0434217	Yes	meth_hyper_RNA_down	multidrug resistance-associated protein 6	0	0	XP_025883816.1	0
Solyc03g083147	SL3.0ch03	54409121	54411121	+	3859	7124	4746	7197	35.136	39.739	4.60264	1.85476e-12	-1.28141	3.10277	0.000386099	0.0114321	Yes	meth_hyper_RNA_down	Defective in meristem silencing 3	0	0	XP_025885714.1	0
Solyc03g083910	SL3.0ch03	55283499	55285499	-	5768	9399	6543	10181	38.03	39.123	1.09348	0.0248426	-2.21414	10.3033	0.000928091	0.0222565	No	meth_hyper_RNA_down	symbol=TIV1	GO:0004564|GO:0004575	beta-fructofuranosidase activity | sucrose alpha-glucosidase activity	NP_001234843.2	AT1G62660.1
Solyc03g093550	SL3.0ch03	56356445	56358445	-	7695	10845	9446	12418	41.505	43.203	1.69859	0.000463945	-1.20405	6.54262	0.00259984	0.0487375	No	meth_hyper_RNA_down	Ethylene-responsive transcription factor	GO:0003700|GO:0006355	DNA-binding transcription factor activity | regulation of transcription, DNA-templated	XP_004235185.1	AT5G51190.1
Solyc03g112170	SL3.0ch03	64151792	64153792	+	237	4461	327	3587	5.045	8.355	3.30992	1.46471e-09	-2.5717	4.07109	4.67188e-05	0.00222213	No	meth_hyper_RNA_down	Invertase/pectin methylesterase inhibitor family protein	GO:0043086|GO:0046910	negative regulation of catalytic activity | pectinesterase inhibitor activity	XP_004236545.1	AT3G17220.1
Solyc03g112565	SL3.0ch03	64433537	64435537	+	122	3009	398	3036	3.897	11.59	7.69346	4.74347e-31	-1.23626	5.08953	8.72885e-06	0.000594693	Yes	meth_hyper_RNA_down	Ribonucleoside-diphosphate reductase subunit beta	0	0	XP_010319002.1	0
Solyc03g115100	SL3.0ch03	66395810	66397810	-	122	3232	123	1194	3.637	9.339	5.70196	2.74482e-13	-0.954301	3.97399	0.00234927	0.0450797	No	meth_hyper_RNA_down	Formate hydrogenlyase subunit 5	0	0	XP_004236048.1	AT5G61040.1
Solyc03g116630	SL3.0ch03	67447922	67449922	+	242	3154	320	2683	7.126	10.656	3.52998	8.63354e-07	-1.46974	5.489	0.00111813	0.0256366	No	meth_hyper_RNA_down	cytochrome P450 family protein	0	0	XP_004235963.1	AT1G52565.1
Solyc03g116770	SL3.0ch03	67537443	67539443	+	2241	7187	2332	6704	23.77	25.808	2.03826	0.000986659	-3.76408	2.11825	6.60266e-05	0.00289772	No	meth_hyper_RNA_down	seed dormancy control protein	GO:0006351|GO:0043565	transcription, DNA-templated | sequence-specific DNA binding	XP_004236461.1	AT1G15320.1
Solyc03g118630	SL3.0ch03	68964890	68966890	-	1986	4806	2086	4521	29.24	31.573	2.33229	0.00230576	-2.1075	2.44185	6.43599e-05	0.00284201	No	meth_hyper_RNA_down	transmembrane protein	0	0	XP_004235828.1	AT3G17950.1
Solyc03g119610	SL3.0ch03	69667805	69669805	+	4043	7016	5558	8919	36.558	38.392	1.83347	0.00195595	-1.79964	6.19045	1.41167e-05	0.00086165	Yes	meth_hyper_RNA_down	LOW QUALITY:ATP synthase subunit alpha, chloroplastic	0	0	XP_004235829.1	AT1G13360.1
Solyc03g119940	SL3.0ch03	69952253	69954253	+	9047	4654	10427	5098	66.032	67.163	1.13096	0.0224863	-3.10374	0.728044	0.000342311	0.010438	No	meth_hyper_RNA_down	MJK13.21 protein	0	0	XP_010318582.1	AT3G15550.1
Solyc03g120690	SL3.0ch03	70476760	70478760	-	4041	7010	5429	7511	36.567	41.955	5.38835	7.61084e-17	-1.4729	2.0543	0.0021854	0.0428784	No	meth_hyper_RNA_down	Dynein light chain family protein	GO:0007017|GO:0030286	microtubule-based process | dynein complex	XP_019068722.1	AT3G16120.1
Solyc04g005540	SL3.0ch04	353237	355237	+	359	3464	362	1987	9.391	15.411	6.02028	4.61989e-12	-2.31727	5.03081	4.51932e-14	4.36884e-11	Yes	meth_hyper_RNA_down	Disease resistance protein (NBS-LRR class) family	GO:0043531	ADP binding	XP_004237217.2	AT4G27190.1
Solyc04g007210	SL3.0ch04	907238	909238	-	8282	8767	8148	8235	48.578	49.734	1.15685	0.0191687	-1.37363	4.08903	0.00119966	0.0271292	No	meth_hyper_RNA_down	CONSTANS-like zinc finger protein	GO:0005622|GO:0008270	intracellular | zinc ion binding	XP_004236986.1	AT1G25440.1
Solyc04g008650	SL3.0ch04	2278048	2280048	+	2030	7670	2332	8239	20.928	22.06	1.13252	0.0271143	-1.94073	3.43063	0.00236603	0.0452649	No	meth_hyper_RNA_down	Receptor-kinase, putative	GO:0004672|GO:0005524|GO:0006468	protein kinase activity | ATP binding | protein phosphorylation	XP_004237180.2	AT1G10850.1
Solyc04g009473	SL3.0ch04	2887099	2889099	+	959	1990	1351	2402	32.519	35.998	3.47837	0.00216409	-1.0697	4.15148	0.00140944	0.0308017	Yes	meth_hyper_RNA_down	mediator of RNA polymerase II transcription subunit	0	0	XP_025886378.1	0
Solyc04g024840	SL3.0ch04	28581625	28583625	+	7628	5764	9709	6765	56.959	58.935	1.97591	0.00046927	-2.33503	0.907346	0.00235893	0.0451923	No	meth_hyper_RNA_down	GDSL lipase-like protein	GO:0016788	hydrolase activity, acting on ester bonds	XP_004237239.1	AT5G40990.1
Solyc04g050760	SL3.0ch04	48180422	48182422	+	9397	10477	12240	10875	47.283	52.953	5.66975	1.29195e-30	-1.24953	4.22446	0.000196109	0.0067188	No	meth_hyper_RNA_down	U11/U12 small nuclear ribonucleoprotein	0	0	XP_010319817.1	AT3G04160.2
Solyc04g064763	SL3.0ch04	55925367	55927367	-	2139	5737	3495	7297	27.158	32.385	5.22664	4.32269e-14	-4.67397	4.91636	1.7392e-23	3.88798e-20	No	meth_hyper_RNA_down	Zinc finger CCCH domain-containing protein 38	GO:0046872	metal ion binding	XP_004237735.1	0
Solyc04g064765	SL3.0ch04	55926123	55928123	-	3841	7280	5566	9049	34.538	38.084	3.5459	8.20608e-09	-5.20099	1.5348	1.11247e-05	0.000711821	No	meth_hyper_RNA_down	exostosin family protein	0	0	XP_004237735.1	0
Solyc04g072260	SL3.0ch04	59349872	59351872	-	143	1789	48	319	7.402	13.079	5.67736	0.000475953	-1.07097	4.44678	0.00203021	0.0406815	No	meth_hyper_RNA_down	Midasin	0	0	XP_010320131.1	AT1G67120.1
Solyc04g079190	SL3.0ch04	63828479	63830479	+	337	5344	524	6226	5.932	7.763	1.83091	5.60626e-05	-2.38134	3.60952	2.06555e-05	0.00116715	No	meth_hyper_RNA_down	alpha/beta-Hydrolases superfamily protein	GO:0008152|GO:0016787	metabolic process | hydrolase activity	XP_004238173.1	AT1G47480.1
Solyc04g080740	SL3.0ch04	64929430	64931430	+	158	6970	443	8301	2.217	5.066	2.84972	7.22391e-21	-1.04133	5.71448	0.00168011	0.0354213	Yes	meth_hyper_RNA_down	BZIP transcription factor family protein	GO:0003700|GO:0006355|GO:0043565	DNA-binding transcription factor activity | regulation of transcription, DNA-templated | sequence-specific DNA binding	XP_004238299.1	AT1G75390.1
Solyc04g081480	SL3.0ch04	65522885	65524885	+	5893	8201	8348	8845	41.812	48.555	6.74253	1.30413e-31	-1.62512	2.35359	0.000568056	0.0155695	No	meth_hyper_RNA_down	Dihydroxy-acid dehydratase 1	0	0	XP_004238362.2	0
Solyc04g082380	SL3.0ch04	66145997	66147997	+	7928	7371	9535	7413	51.82	56.26	4.43995	5.23873e-15	-5.98152	-0.735619	0.000715802	0.0184061	No	meth_hyper_RNA_down	BnaA03g07530D protein	0	0	XP_004238424.1	0
Solyc04g082460	SL3.0ch04	66181161	66183161	+	11942	6838	14186	7428	63.589	65.633	2.04446	1.89747e-05	-1.27436	5.3693	0.000446433	0.0127949	No	meth_hyper_RNA_down	Catalase 3	GO:0020037|GO:0055114	heme binding | oxidation-reduction process	XP_004238430.1	AT4G35090.1
Solyc05g009200	SL3.0ch05	3344032	3346032	+	3560	4306	4761	4711	45.258	50.264	5.00586	1.1369e-10	-11.4335	2.40191	9.35393e-17	1.33829e-13	Yes	meth_hyper_RNA_down	DUF1639 family protein	0	0	XP_004239412.1	AT1G68340.1
Solyc05g014550	SL3.0ch05	8401595	8403595	-	3494	4267	3812	3060	45.02	55.471	10.4515	2.6721e-35	-2.70244	0.933012	0.00175405	0.0365406	No	meth_hyper_RNA_down	LOW QUALITY:TRAM, LAG1 and CLN8 (TLC) lipid-sensing domain containing protein	GO:0016021	integral component of membrane	XP_004233304.1	AT5G14280.1
Solyc05g024230	SL3.0ch05	30897748	30899748	-	1276	5749	1421	5536	18.164	20.425	2.26177	0.000545256	-2.51465	2.79756	0.00127552	0.0284426	No	meth_hyper_RNA_down	ATP-dependent 6-phosphofructokinase	0	0	XP_004245542.1	0
Solyc05g045945	SL3.0ch05	58588475	58590475	+	2313	5317	2378	5156	30.315	31.564	1.24903	0.0488605	-7.44505	-2.3772	3.36197e-05	0.00170097	No	meth_hyper_RNA_down	LOW QUALITY:HAT family dimerisation domain containing protein, expressed	GO:0046983	protein dimerization activity	XP_019068943.1	0
Solyc05g051660	SL3.0ch05	62897478	62899478	+	7711	8548	9863	9347	47.426	51.343	3.91701	5.94764e-13	-1.71399	6.65818	0.00174454	0.0364479	No	meth_hyper_RNA_down	Alpha/beta-Hydrolases superfamily protein	GO:0008152|GO:0016787	metabolic process | hydrolase activity	NP_001316336.1	AT3G48690.1
Solyc05g052270	SL3.0ch05	63386626	63388626	-	8582	11429	9501	11954	42.886	44.283	1.39697	0.00279978	-1.20157	5.3423	0.000692366	0.0180147	No	meth_hyper_RNA_down	Non-specific serine/threonine protein kinase	GO:0007165	signal transduction	XP_010321289.1	AT5G58380.1
Solyc05g055200	SL3.0ch05	65791250	65793250	+	199	1538	352	1541	11.457	18.595	7.13829	3.66826e-09	-4.87468	-0.780459	1.06901e-05	0.00069019	No	meth_hyper_RNA_down	Double Clp-N motif-containing P-loop nucleoside triphosphate hydrolases superfamily protein, putative	GO:0019538	protein metabolic process	XP_010321352.1	AT3G52490.1
Solyc06g008820	SL3.0ch06	2759494	2761494	+	7269	8544	8162	8480	45.969	49.045	3.07608	4.69254e-08	-1.66926	4.80897	9.97314e-05	0.00393343	No	meth_hyper_RNA_down	Na+//0A7//9AL///QC9//0Aw//9AK///QDv//0Av//9AL3//QDC//0Asf/9AO///QC///0Avf/9AML//QC///0A7//9AL///QC9//0Aw//9AK///QDv//0Av//9AL3//QDC//0Av//9AO///QC///0Avf/9AML//QC9 antiporter 1	GO:0006814|GO:0006885|GO:0015385|GO:0016021|GO:0055085	sodium ion transport | regulation of pH | sodium:proton antiporter activity | integral component of membrane | transmembrane transport	XP_025887088.1	AT3G05030.1
Solyc06g084760	SL3.0ch06	35665218	35667218	+	7904	8627	9533	9597	47.813	49.833	2.01952	0.000124701	-1.77996	4.96021	3.16243e-06	0.000259436	No	meth_hyper_RNA_down	Cytochrome P450	GO:0005506|GO:0016705|GO:0020037|GO:0055114	iron ion binding | oxidoreductase activity, acting on paired donors, with incorporation or reduction of molecular oxygen | heme binding | oxidation-reduction process	XP_004244272.1	AT1G17060.1
Solyc06g054640	SL3.0ch06	37507696	37509696	+	6725	8458	8219	8527	44.293	49.08	4.78742	5.018e-17	-3.22709	2.03192	0.00207897	0.0413805	Yes	meth_hyper_RNA_down	DUF506 family protein	0	0	XP_019069776.1	AT2G38820.2
Solyc06g066280	SL3.0ch06	41701067	41703067	-	132	4935	168	3542	2.605	4.528	1.92321	1.56663e-06	-6.38118	-1.24059	2.37405e-07	3.25527e-05	No	meth_hyper_RNA_down	Cytochrome P450, putative	GO:0016705|GO:0055114	oxidoreductase activity, acting on paired donors, with incorporation or reduction of molecular oxygen | oxidation-reduction process	XP_019069749.1	AT2G45550.1
Solyc06g066330	SL3.0ch06	41727365	41729365	+	6625	6996	5132	4484	48.638	53.369	4.73125	3.25641e-12	-1.61252	7.01126	7.19894e-06	0.000496131	No	meth_hyper_RNA_down	Poly [ADP-ribose] polymerase	GO:0003950	NAD ADP-ribosyltransferase activity	XP_025887384.1	AT1G32230.1
Solyc06g068450	SL3.0ch06	42536002	42538002	-	3680	4930	3713	3697	42.741	50.108	7.36696	6.71739e-20	-1.14839	6.43693	0.00119591	0.027073	Yes	meth_hyper_RNA_down	Non-specific serine/threonine protein kinase	GO:0007165	signal transduction	XP_004241680.1	AT5G25110.1
Solyc07g005210	SL3.0ch07	203432	205432	-	109	2742	212	2783	3.823	7.078	3.25524	6.08013e-08	-1.87851	7.14188	0.000105871	0.00412436	No	meth_hyper_RNA_down	Temperature-induced lipocalin	GO:0005215	transporter activity	NP_001234832.1	AT5G58070.1
Solyc07g006370	SL3.0ch07	1196171	1198171	-	3375	9550	3339	8659	26.112	27.83	1.71745	0.00163966	-2.28858	5.77883	1.26775e-08	2.76493e-06	No	meth_hyper_RNA_down	Cation calcium exchanger	GO:0016021|GO:0055085	integral component of membrane | transmembrane transport	XP_010323232.1	AT5G17860.1
Solyc07g038137	SL3.0ch07	45615074	45617074	-	1763	3271	1543	2406	35.022	39.073	4.05133	7.24674e-05	-10.6952	0.470723	2.0057e-14	1.99277e-11	No	meth_hyper_RNA_down	LOW QUALITY:HAT family dimerisation domain containing protein, expressed	GO:0046983	protein dimerization activity	XP_010322081.1	0
Solyc07g039410	SL3.0ch07	47549939	47551939	-	794	3398	2953	6080	18.941	32.691	13.7504	4.30154e-61	-8.05289	-1.83825	6.06277e-05	0.00271746	No	meth_hyper_RNA_down	EDNR2GH3 protein	GO:0043531	ADP binding	XP_004236838.1	AT3G46730.1
Solyc07g044760	SL3.0ch07	57931908	57933908	+	9889	7594	10921	7596	56.564	58.978	2.41472	4.09791e-06	-1.07326	8.12482	8.68282e-05	0.00354125	Yes	meth_hyper_RNA_down	RNA helicase DEAD23	GO:0003676|GO:0005524	nucleic acid binding | ATP binding	XP_010323935.2	AT3G22330.1
Solyc07g044860	SL3.0ch07	58050679	58052679	-	3787	8070	4631	8195	31.939	36.106	4.16741	1.32213e-11	-1.27309	8.42431	0.00136699	0.030052	Yes	meth_hyper_RNA_down	psbXphotosystem II 23 kDa protein	GO:0005509|GO:0009523|GO:0009654|GO:0015979|GO:0019898	calcium ion binding | photosystem II | photosystem II oxygen evolving complex | photosynthesis | extrinsic component of membrane	NP_001234109.2	AT1G06680.1
Solyc07g045170	SL3.0ch07	58388424	58390424	+	3862	3365	5022	3168	53.438	61.319	7.88019	3.8491e-22	-1.3197	3.85842	0.000788331	0.0196769	No	meth_hyper_RNA_down	Cytochrome P450	0	0	XP_004243880.1	AT2G04235.1
Solyc07g047640	SL3.0ch07	59003305	59005305	-	7570	8479	7694	7917	47.168	49.286	2.11771	0.000141612	-3.19126	0.962401	5.86709e-05	0.00264967	No	meth_hyper_RNA_down	LOW QUALITY:F-box protein	0	0	XP_004252041.3	AT3G07870.1
Solyc07g049160	SL3.0ch07	59546381	59548381	-	32	1155	80	1509	2.696	5.035	2.33874	0.00126902	-1.401	7.89939	0.000781905	0.0195634	No	meth_hyper_RNA_down	Ribonuclease 3 family protein	GO:0004525|GO:0006396	ribonuclease III activity | RNA processing	XP_010323858.2	AT4G15417.1
Solyc07g051860	SL3.0ch07	60525159	60527159	-	187	3042	548	3753	5.791	12.741	6.94996	5.50961e-24	-4.19347	2.40419	3.04119e-06	0.000251661	No	meth_hyper_RNA_down	MAP kinase kinase kinase 50	GO:0005524	ATP binding	XP_004243854.1	AT2G32510.1
Solyc07g054070	SL3.0ch07	62591672	62593672	-	5138	8179	5733	8254	38.582	40.988	2.4058	4.68219e-05	-2.32765	3.17064	2.11775e-06	0.000189051	No	meth_hyper_RNA_down	DTW domain-containing family protein	0	0	XP_004243350.2	AT1G03687.1
Solyc07g054760	SL3.0ch07	63106687	63108687	-	10783	5998	14235	6582	64.257	68.382	4.12442	1.69886e-16	-1.21008	7.71983	0.00242524	0.0462892	No	meth_hyper_RNA_down	LOW QUALITY:Wound-responsive family protein	0	0	XP_004243310.1	AT4G10265.1
Solyc07g054850	SL3.0ch07	63157013	63159013	+	9783	10723	10155	9986	47.708	50.42	2.71155	6.82002e-08	-1.49235	3.96642	0.00111183	0.0255386	No	meth_hyper_RNA_down	transmembrane protein	0	0	XP_004243303.1	AT4G28100.1
Solyc07g063450	SL3.0ch07	66059241	66061241	+	5	476	30	490	1.04	5.769	4.72973	3.74134e-05	-1.25481	3.14393	0.000478495	0.0135832	No	meth_hyper_RNA_down	Lysine-specific histone demethylase 1-like protein	GO:0016491|GO:0055114	oxidoreductase activity | oxidation-reduction process	XP_025887935.1	AT3G13682.1
Solyc07g066300	SL3.0ch07	67900508	67902508	+	7199	7487	10136	9387	49.019	51.918	2.89878	1.6472e-07	-1.11282	4.36426	0.00140865	0.0308017	Yes	meth_hyper_RNA_down	DNA gyrase subunit B	0	0	XP_010324220.1	AT1G05950.1
Solyc08g005510	SL3.0ch08	384377	386377	-	563	1960	494	1109	22.315	30.817	8.50251	2.72227e-09	-2.61926	0.898115	0.000201964	0.00686679	Yes	meth_hyper_RNA_down	disease resistance protein (TIR-NBS-LRR class)	GO:0043531	ADP binding	XP_010324492.1	AT5G17680.1
Solyc08g007130	SL3.0ch08	1698733	1700733	+	2253	8173	2928	9627	21.609	23.321	1.71195	0.0014155	-4.70835	1.43822	8.06223e-07	8.71208e-05	No	meth_hyper_RNA_down	Beta-amylase	GO:0005975	carbohydrate metabolic process	XP_004244551.1	AT4G17090.1
Solyc08g007330	SL3.0ch08	1906754	1908754	-	4507	11019	5438	12570	29.029	30.198	1.16896	0.0116432	-2.03726	1.49971	0.000170783	0.00605407	No	meth_hyper_RNA_down	DNA mismatch repair protein mutS	GO:0005524|GO:0006298|GO:0030983	ATP binding | mismatch repair | mismatched DNA binding	XP_010324585.1	AT4G17380.1
Solyc08g007865	SL3.0ch08	2390668	2392668	-	5864	5311	6336	4917	52.474	56.305	3.83071	1.44816e-08	-5.8332	-2.05966	4.52924e-05	0.0021658	No	meth_hyper_RNA_down	Cytochrome P450 family protein	GO:0005506|GO:0016705|GO:0020037|GO:0055114	iron ion binding | oxidoreductase activity, acting on paired donors, with incorporation or reduction of molecular oxygen | heme binding | oxidation-reduction process	XP_019070767.1	0
Solyc08g029050	SL3.0ch08	38362531	38364531	-	4900	9625	6321	9720	33.735	39.405	5.67033	7.54209e-24	-1.16335	4.79186	0.000537384	0.0149455	No	meth_hyper_RNA_down	TOPLESS 6	GO:0005515	protein binding	XP_010324820.1	AT1G80490.2
Solyc08g061180	SL3.0ch08	47256643	47258643	-	239	1109	2902	4842	17.73	37.474	19.7442	1.23928e-47	-8.66594	-0.761416	4.04819e-06	0.000314773	No	meth_hyper_RNA_down	Pentatricopeptide repeat-containing protein, putative	0	0	XP_025888588.1	AT3G53700.1
Solyc08g062510	SL3.0ch08	51248336	51250336	-	2170	7787	2715	9083	21.794	23.012	1.21866	0.0181639	-7.43875	-0.0623405	6.76685e-09	1.76076e-06	No	meth_hyper_RNA_down	Homeobox leucine zipper protein	GO:0008289	lipid binding	XP_019071156.1	AT3G03260.1
Solyc08g062515	SL3.0ch08	51267134	51269134	-	873	2998	765	2246	22.552	25.407	2.85453	0.00398377	-8.54802	-1.50914	2.0651e-06	0.000185589	No	meth_hyper_RNA_down	Homeobox-leucine zipper family protein	GO:0008289	lipid binding	XP_025883818.1	0
Solyc08g065870	SL3.0ch08	54272185	54274185	+	9751	7388	12009	8018	56.894	59.964	3.07041	4.04481e-09	-0.975053	4.72426	0.000786393	0.0196422	Yes	meth_hyper_RNA_down	EARLY FLOWERING 3	0	0	XP_004245125.1	AT2G25930.1
Solyc08g066920	SL3.0ch08	55851083	55853083	+	2837	5819	6315	8491	32.775	42.652	9.87667	1.09274e-49	-3.73152	-1.50828	0.00177139	0.0368366	No	meth_hyper_RNA_down	ATP/ADP transporter	GO:0005471|GO:0005524|GO:0006810|GO:0016021	ATP:ADP antiporter activity | ATP binding | transport | integral component of membrane	XP_010325110.2	AT1G80300.1
Solyc08g067185	SL3.0ch08	56234716	56236716	-	165	1484	114	795	10.006	12.541	2.53519	0.0287164	-2.61845	-0.265534	0.00179826	0.037287	No	meth_hyper_RNA_down	Malate dehydrogenase [NADP], chloroplastic	0	0	XP_025884648.1	0
Solyc09g008830	SL3.0ch09	2254528	2256528	+	154	1132	218	718	11.975	23.291	11.3155	8.57254e-12	-1.856	4.56469	0.00072295	0.0185365	Yes	meth_hyper_RNA_down	Transcription factor, putative	0	0	XP_010325945.1	AT3G10040.1
Solyc09g009120	SL3.0ch09	2452333	2454333	+	16246	8511	17513	8617	65.622	67.023	1.40074	0.000635872	-0.938051	5.0344	0.000552832	0.0152457	No	meth_hyper_RNA_down	Pre-mRNA cleavage complex 2 protein Pcf11	GO:0046872	metal ion binding	XP_004246564.1	AT2G36480.3
Solyc09g010210	SL3.0ch09	3594803	3596803	+	5665	9585	6779	9239	37.148	42.321	5.1736	5.45801e-20	-1.74453	6.80781	0.000700071	0.0181319	No	meth_hyper_RNA_down	endo-1,4-beta-glucanase precursor (Cel2)	GO:0004553|GO:0005975	hydrolase activity, hydrolyzing O-glycosyl compounds | carbohydrate metabolic process	NP_001234867.1	AT1G70710.1
Solyc09g015100	SL3.0ch09	8000153	8002153	+	1467	2150	4555	5187	40.558	46.756	6.19784	3.2029e-10	-6.84821	-0.935373	0.000699339	0.018126	No	meth_hyper_RNA_down	Endoribonuclease Dicer homolog 2	0	0	XP_004247733.1	0
Solyc09g018160	SL3.0ch09	13374258	13376258	+	981	2407	6776	10800	28.955	38.553	9.59744	6.77364e-26	-1.21821	4.31463	0.000150765	0.00545256	No	meth_hyper_RNA_down	Nucleotidyltransferase domain containing protein, expressed	0	0	XP_004246272.1	AT3G51620.2
Solyc09g018750	SL3.0ch09	16859297	16861297	-	63	4577	452	14017	1.358	3.124	1.76616	1.39808e-11	-1.67085	7.59001	1.79054e-08	3.70197e-06	No	meth_hyper_RNA_down	CBS domain-containing protein	0	0	NP_001294933.1	AT5G10860.1
Solyc09g018970	SL3.0ch09	17783940	17785940	+	8	160	2731	4887	4.762	35.849	31.0874	1.00513e-20	-7.49095	-1.98561	1.98404e-05	0.00113227	No	meth_hyper_RNA_down	LOW QUALITY:Kinase interacting (KIP1-like) family protein	0	0	XP_010322512.1	0
Solyc09g042670	SL3.0ch09	24986929	24988929	+	863	2242	4140	8459	27.794	32.86	5.06587	6.92762e-08	-8.84542	2.20506	5.6478e-24	1.44293e-20	No	meth_hyper_RNA_down	Methyltransferase MT-A70 family protein isoform 1	0	0	XP_004246979.1	0
Solyc09g047870	SL3.0ch09	33829616	33831616	-	1290	2050	11851	9801	38.623	54.734	16.1112	5.3906e-66	-2.17932	2.01894	8.40089e-06	0.000575638	No	meth_hyper_RNA_down	Hemolysin A	GO:0008168|GO:0032259	methyltransferase activity | methylation	XP_025888524.1	AT3G25470.1
Solyc09g055760	SL3.0ch09	44659643	44661643	-	1318	1500	10076	9906	46.771	50.425	3.65462	0.000240243	-1.15546	6.09588	1.36962e-05	0.000843177	No	meth_hyper_RNA_down	myosin heavy chain-like protein	0	0	XP_025888496.1	AT5G59210.1
Solyc09g056135	SL3.0ch09	47375658	47377658	-	663	1398	2260	2789	32.169	44.761	12.5925	4.59675e-22	-3.34877	1.034	3.03115e-05	0.00158506	No	meth_hyper_RNA_down	Ribosomal protein L15	GO:0003735|GO:0005840|GO:0006412	structural constituent of ribosome | ribosome | translation	XP_004242022.1	0
Solyc09g057524	SL3.0ch09	49819019	49821019	-	691	2523	2292	7400	21.5	23.648	2.14868	0.00734272	-9.08191	-1.07497	6.25563e-08	1.09682e-05	No	meth_hyper_RNA_down	Homeobox leucine zipper protein	0	0	XP_025888845.1	0
Solyc09g057580	SL3.0ch09	50076345	50078345	-	1935	1644	11506	9047	54.065	55.982	1.91671	0.0190348	-1.77755	4.4842	1.2524e-05	0.000783142	No	meth_hyper_RNA_down	UV-B-induced protein, chloroplastic	0	0	XP_004247039.1	AT3G07310.1
Solyc09g057660	SL3.0ch09	50351307	50353307	-	79	155	8022	8539	33.761	48.439	14.6784	9.48195e-06	-2.39619	6.73475	1.34344e-15	1.77971e-12	No	meth_hyper_RNA_down	Peptidyl-prolyl cis-trans isomerase	GO:0005515	protein binding	XP_004247044.1	AT3G25230.2
Solyc09g058980	SL3.0ch09	52937820	52939820	+	668	2505	5090	14054	21.053	26.588	5.53533	4.5014e-11	-3.86399	0.554061	3.26675e-06	0.000265557	No	meth_hyper_RNA_down	long-chain acyl-CoA synthetase 7	0	0	XP_004243697.1	0
Solyc09g059125	SL3.0ch09	53649753	53651753	+	16	724	191	1542	2.162	11.021	8.85919	2.92048e-15	-5.69294	-2.15175	0.000728893	0.0185847	No	meth_hyper_RNA_down	CW14 protein (DUF1336)	0	0	XP_004236975.1	0
Solyc09g059950	SL3.0ch09	57174419	57176419	+	1031	1485	6955	7385	40.978	48.501	7.52295	7.58266e-12	-2.04141	2.1204	0.000131325	0.00490828	No	meth_hyper_RNA_down	Amino acid--[acyl-carrier-protein] ligase	0	0	XP_004247079.1	AT3G07150.1
Solyc09g060090	SL3.0ch09	57811348	57813348	-	2244	5305	6508	9107	29.726	41.678	11.9521	8.1623e-69	-1.78796	4.35739	1.52511e-07	2.28244e-05	No	meth_hyper_RNA_down	Sec14p-like phosphatidylinositol transfer family protein	GO:0005215|GO:0005622|GO:0006810	transporter activity | intracellular | transport	XP_019071314.1	AT3G24840.1
Solyc09g065540	SL3.0ch09	63891173	63893173	+	9879	4347	18075	7298	69.443	71.237	1.79387	0.000153014	-0.88846	7.05582	0.000835721	0.0205303	No	meth_hyper_RNA_down	biotin-binding protein	GO:0005524|GO:0046872	ATP binding | metal ion binding	NP_001296112.1	AT1G03090.2
Solyc09g074380	SL3.0ch09	66601065	66603065	-	8149	9513	9539	9835	46.139	49.236	3.09749	4.56031e-09	-4.91888	2.86638	9.6993e-11	4.8184e-08	Yes	meth_hyper_RNA_down	DCD (Development and Cell Death) domain protein	0	0	XP_010326613.1	AT2G32910.1
Solyc09g082250	SL3.0ch09	68474896	68476896	+	1548	5248	1808	4545	22.778	28.459	5.68089	2.75636e-13	-1.9903	4.279	0.00134041	0.029522	No	meth_hyper_RNA_down	Acetyltransferase (GNAT) domain protein	GO:0008080	N-acetyltransferase activity	XP_004247574.1	AT2G32030.1
Solyc09g083030	SL3.0ch09	69133263	69135263	-	2375	7267	2971	6388	24.632	31.745	7.11303	1.11206e-26	-1.8513	6.60244	1.72436e-06	0.000162307	No	meth_hyper_RNA_down	LOW QUALITY:Mannose-binding lectin superfamily protein	0	0	XP_010326701.1	AT1G05760.1
Solyc09g090510	SL3.0ch09	70484937	70486937	+	2566	10149	2792	10295	20.181	21.334	1.15326	0.0132563	-3.29204	4.82465	1.26503e-06	0.000125205	No	meth_hyper_RNA_down	Cyclopropane-fatty-acyl-phospholipid synthase	GO:0016491|GO:0055114	oxidoreductase activity | oxidation-reduction process	XP_004247758.1	AT3G23530.1
Solyc10g008230	SL3.0ch10	2327554	2329554	+	129	2806	155	2758	4.395	5.321	0.925745	0.0498448	-1.67359	1.87671	0.000553531	0.0152532	No	meth_hyper_RNA_down	Disease resistance protein	GO:0043531	ADP binding	XP_010327076.1	AT3G46730.1
Solyc10g008420	SL3.0ch10	2532965	2534965	-	6544	9984	7364	10721	39.593	40.719	1.12541	0.0184458	-0.929384	5.18928	0.000608094	0.0163782	Yes	meth_hyper_RNA_down	acyl-UDP-N-acetylglucosamine O-acyltransferase	GO:0046872	metal ion binding	XP_004248159.1	AT4G28260.1
Solyc10g008655	SL3.0ch10	2733901	2735901	+	15220	20875	19409	22505	42.167	46.307	4.14022	4.5551e-30	-1.83095	2.98281	0.000927568	0.0222565	No	meth_hyper_RNA_down	Anthocyanin 5-aromatic acyltransferase	GO:0016747	transferase activity, transferring acyl groups other than amino-acyl groups	XP_025883531.1	0
Solyc06g034310	SL3.0ch10	8931370	8933370	-	2913	3766	4148	4550	43.614	47.689	4.07481	6.94052e-07	-9.88422	0.259469	1.59484e-10	7.24521e-08	No	meth_hyper_RNA_down	Myb/SANT-like DNA-binding domain protein	0	0	XP_025883703.1	AT5G35695.1
Solyc10g044670	SL3.0ch10	27324383	27326383	+	4300	4690	4962	5150	47.831	49.07	1.23949	0.0449169	-1.26185	5.87851	4.6619e-06	0.000356297	No	meth_hyper_RNA_down	phytochrome A	GO:0018298	protein-chromophore linkage	XP_025888908.1	AT1G09570.1
Solyc10g054274	SL3.0ch10	55135461	55137461	+	230	2105	201	579	9.85	25.769	15.9191	4.40078e-25	-6.14193	-2.342	0.0018551	0.0381897	No	meth_hyper_RNA_down	LOW QUALITY:Myb/SANT-like DNA-binding domain protein	0	0	XP_025883703.1	0
Solyc10g076740	SL3.0ch10	59784899	59786899	-	9	88	33	120	9.278	21.569	12.2903	0.00864435	-1.58238	5.24056	1.64582e-05	0.000977869	No	meth_hyper_RNA_down	GDSL esterase/lipase family	GO:0016788	hydrolase activity, acting on ester bonds	XP_010327727.1	AT3G11210.1
Solyc10g078730	SL3.0ch10	60589394	60591394	+	10312	6691	12963	7333	60.648	63.87	3.22161	3.5197e-10	-1.11154	3.18608	0.00207458	0.0413161	Yes	meth_hyper_RNA_down	Non-structural maintenance of chromosome element 4	GO:0005634|GO:0006281|GO:0030915	nucleus | DNA repair | Smc5-Smc6 complex	XP_004249168.1	AT1G51130.1
Solyc10g078940	SL3.0ch10	60709916	60711916	+	6303	10694	8332	11152	37.083	42.763	5.68028	2.45507e-27	-2.8033	0.240553	0.00102869	0.0240014	Yes	meth_hyper_RNA_down	Kinase family protein	GO:0005524	ATP binding	XP_010312070.1	AT2G41970.1
Solyc10g079050	SL3.0ch10	60812704	60814704	-	2165	5518	2978	6939	28.179	30.029	1.85015	0.00476498	-2.14517	2.83996	0.000540823	0.0149838	No	meth_hyper_RNA_down	BHLH transcription factor o95	GO:0046983	protein dimerization activity	XP_004249190.1	AT2G42280.1
Solyc10g079600	SL3.0ch10	61233383	61235383	-	2152	5801	2128	5234	27.059	28.905	1.84622	0.0067912	-2.22251	1.39492	0.00077597	0.0194362	No	meth_hyper_RNA_down	Two-component response regulator	GO:0000160	phosphorelay signal transduction system	XP_004249238.1	AT3G57040.1
Solyc10g081250	SL3.0ch10	62477225	62479225	+	3825	6572	3357	5206	36.789	39.204	2.41409	0.000522049	-1.07712	4.19092	0.00225677	0.043822	No	meth_hyper_RNA_down	DNA polymerase	GO:0008408	3'-5' exonuclease activity	XP_004249349.1	AT5G63960.2
Solyc10g085460	SL3.0ch10	64754219	64756219	-	1406	4761	10521	11065	22.799	48.74	25.9412	4.88305e-302	-1.97372	4.63049	8.98034e-08	1.46004e-05	No	meth_hyper_RNA_down	Nbs-lrr resistance protein, putative	GO:0043531	ADP binding	XP_010312315.1	AT3G14470.1
Solyc10g086660	SL3.0ch10	65566064	65568064	-	267	4300	309	4202	5.846	6.85	1.00363	0.0278176	-0.997986	5.34542	0.000673633	0.0177296	No	meth_hyper_RNA_down	Rop guanine nucleotide exchange factor, putative	GO:0005089	Rho guanyl-nucleotide exchange factor activity	XP_004249581.1	AT5G02010.1
Solyc11g011300	SL3.0ch11	4338491	4340491	+	523	5214	609	4776	9.116	11.309	2.19293	0.000126177	-2.59444	2.95206	0.000174424	0.00616483	No	meth_hyper_RNA_down	Rhamnogalacturonate lyase family protein	GO:0030246	carbohydrate binding	XP_019066804.1	AT2G22620.1
Solyc11g012290	SL3.0ch11	5146485	5148485	+	8523	9334	10209	8926	47.729	53.352	5.62331	3.11918e-26	-1.27421	4.18274	0.000161654	0.00580218	No	meth_hyper_RNA_down	Upstream activation factor subunit spp27	GO:0005515	protein binding	XP_004250267.1	AT4G22360.1
Solyc11g012950	SL3.0ch11	5794166	5796166	+	1927	5334	2619	5989	26.539	30.425	3.88614	1.00595e-07	-4.40915	1.81324	1.04049e-07	1.66061e-05	No	meth_hyper_RNA_down	RING/U-box superfamily protein, putative	GO:0005515|GO:0008270	protein binding | zinc ion binding	XP_004250323.1	AT1G60360.1
Solyc11g068910	SL3.0ch11	53769640	53771640	-	10438	8992	10683	8443	53.721	55.856	2.13485	2.57009e-05	-1.49949	1.9307	0.000725583	0.0185472	Yes	meth_hyper_RNA_down	Methyl-CpG binding domain containing protein, expressed	GO:0003677|GO:0005634	DNA binding | nucleus	XP_004251394.1	AT1G15340.1
Solyc11g068950	SL3.0ch11	53799400	53801400	-	998	6532	1237	6278	13.254	16.46	3.20676	4.93517e-08	-0.937759	8.54609	0.000490953	0.0138708	No	meth_hyper_RNA_down	BEL1-related homeotic protein 11	GO:0003677|GO:0006355	DNA binding | regulation of transcription, DNA-templated	XP_025884077.1	AT2G35940.1
Solyc11g069470	SL3.0ch11	54358712	54360712	+	1641	8513	2142	9954	16.161	17.708	1.54721	0.00162759	-1.38645	5.45654	2.61706e-06	0.000222874	No	meth_hyper_RNA_down	Homeobox leucine-zipper protein	GO:0008289	lipid binding	XP_004251138.1	AT5G60690.1
Solyc11g072080	SL3.0ch11	55651491	55653491	+	4639	8375	5336	8261	35.646	39.244	3.59772	2.58195e-09	-1.9852	1.41536	0.000582993	0.0159077	No	meth_hyper_RNA_down	Kelch repeat-containing F-box family protein	GO:0005515	protein binding	XP_004251236.1	AT5G26960.1
Solyc12g005020	SL3.0ch12	13598	15598	-	819	7475	898	6989	9.875	11.386	1.51122	0.0013136	-6.34271	3.16221	0.000334998	0.0102852	No	meth_hyper_RNA_down	RING/U-box superfamily protein	GO:0005515|GO:0008270	protein binding | zinc ion binding	XP_004251461.1	AT3G20395.1
Solyc12g006260	SL3.0ch12	774946	776946	-	920	8236	1205	8882	10.048	11.946	1.89801	2.71046e-05	-2.55288	5.97469	5.6417e-05	0.00258047	No	meth_hyper_RNA_down	L-fucokinase/GDP-L-fucose pyrophosphorylase	0	0	XP_010327202.1	0
Solyc12g009610	SL3.0ch12	2875553	2877553	-	8448	6857	10727	8345	55.198	56.245	1.04711	0.0280558	-1.50107	8.37691	6.43258e-05	0.00284201	Yes	meth_hyper_RNA_down	RabGAP/TBC domain-containing protein	0	0	XP_004251725.1	AT5G52580.2
Solyc12g013750	SL3.0ch12	4574206	4576206	-	4897	5277	5827	5329	48.132	52.232	4.09949	4.05801e-09	-1.33902	4.61252	0.000336521	0.0103142	No	meth_hyper_RNA_down	Mannan endo-1,4-beta-mannosidase 1	GO:0005975	carbohydrate metabolic process	XP_025884462.1	AT5G66460.1
Solyc12g036860	SL3.0ch12	48500052	48502052	+	3185	6481	4133	7393	32.951	35.858	2.90751	1.02699e-05	-6.93339	-2.37097	6.84351e-06	0.00047346	No	meth_hyper_RNA_down	Retrotransposon protein	0	0	XP_004240177.1	AT5G41980.1
Solyc12g036870	SL3.0ch12	48501578	48503578	+	2835	4756	3469	5119	37.347	40.394	3.04671	6.89597e-05	-9.01892	-0.399952	4.11277e-10	1.56495e-07	No	meth_hyper_RNA_down	Myb/SANT-like DNA-binding domain protein	0	0	XP_019067004.1	AT4G02550.3
Solyc12g038805	SL3.0ch12	51895705	51897705	+	1613	4692	2119	4741	25.583	30.889	5.30634	3.7033e-11	-4.26941	-0.0447673	6.75431e-06	0.000468194	No	meth_hyper_RNA_down	Serine/threonine-protein kinase	0	0	XP_010321858.1	0
Solyc12g044920	SL3.0ch12	61214412	61216412	+	2258	8862	3104	10138	20.306	23.441	3.13481	6.89323e-09	-1.63584	1.5246	0.00251837	0.0475591	No	meth_hyper_RNA_down	Phospholipid-transporting ATPase	GO:0016021	integral component of membrane	XP_019067244.1	AT1G17500.1
Solyc12g096820	SL3.0ch12	66564631	66566631	+	6821	9907	8512	11300	40.776	42.964	2.18792	2.49543e-05	-1.88938	2.58513	0.000851512	0.0208039	Yes	meth_hyper_RNA_down	Glycosyltransferase	GO:0008152|GO:0016758	metabolic process | transferase activity, transferring hexosyl groups	XP_004253028.2	AT1G05680.1
Solyc00g174330	SL3.0ch00	17167463	17169463	-	3169	7302	3478	6320	30.265	35.497	5.2325	8.24219e-15	5.48219	2.19195	0.000282067	0.00897597	Yes	meth_hyper_RNA_up	Pathogenesis-related protein 1	0	0	NP_001234523.1	AT2G14580.1
Solyc00g174340	SL3.0ch00	17168117	17170117	-	244	3261	258	2384	6.961	9.765	2.80385	8.22183e-05	5.26986	9.35151	0.000279924	0.00893956	No	meth_hyper_RNA_up	Pathogenesis-related protein 1	GO:0005576	extracellular region	NP_001234314.1	AT4G33720.1
Solyc01g005470	SL3.0ch01	324960	326960	-	964	10390	1091	10681	8.49	9.268	0.777354	0.0215879	5.02526	2.29653	0.000136486	0.00506942	No	meth_hyper_RNA_up	PLANT CADMIUM RESISTANCE 2	0	0	XP_004228721.1	AT1G14870.1
Solyc01g005830	SL3.0ch01	562881	564881	+	4868	7926	5527	7823	38.049	41.401	3.35166	5.03614e-08	1.43687	3.57868	0.00223972	0.0436327	No	meth_hyper_RNA_up	Glucan endo-1,3-beta-glucosidase, putative	GO:0005975	carbohydrate metabolic process	XP_010316237.1	AT3G13560.1
Solyc01g008550	SL3.0ch01	2584641	2586641	-	7928	10097	8202	9958	43.983	45.165	1.18184	0.0138684	2.57003	5.03723	0.00042881	0.0124032	Yes	meth_hyper_RNA_up	phenylacetaldehyde reductase PAR2	GO:0003824|GO:0050662	catalytic activity | coenzyme binding	NP_001234830.1	AT5G19440.1
Solyc01g008560	SL3.0ch01	2598580	2600580	-	4827	10936	5093	11017	30.622	31.614	0.991561	0.0293905	2.82168	5.44718	8.36488e-08	1.36619e-05	No	meth_hyper_RNA_up	NAD kinase 1	GO:0003951|GO:0008152|GO:0019674	NAD kinase activity | metabolic process | NAD metabolic process	XP_004228514.1	AT3G21070.1
Solyc01g009810	SL3.0ch01	4183116	4185116	+	4140	7392	5098	7944	35.9	39.089	3.18899	3.58102e-07	9.16059	0.898053	0.000480908	0.0136408	No	meth_hyper_RNA_up	Leucine-rich repeat receptor-like kinase protein	GO:0005515	protein binding	XP_004228437.1	AT5G21090.1
Solyc01g009830	SL3.0ch01	4257069	4259069	+	5855	8319	8732	9324	41.308	48.361	7.05263	2.24775e-35	3.31686	3.68651	0.000146797	0.00537977	No	meth_hyper_RNA_up	Nucleotide/sugar transporter family protein	0	0	XP_004228435.1	AT4G32272.2
Solyc01g009870	SL3.0ch01	4342363	4344363	-	4939	6977	6557	8295	41.448	44.149	2.70046	9.79882e-06	3.84486	5.90475	2.17505e-06	0.000192567	Yes	meth_hyper_RNA_up	Glycerophosphodiester phosphodiesterase, putative	GO:0006629|GO:0008081	lipid metabolic process | phosphoric diester hydrolase activity	XP_004228433.1	AT5G43300.1
Solyc01g010660	SL3.0ch01	5615545	5617545	+	11303	9948	13087	10910	53.188	54.536	1.3479	0.00280597	2.70871	5.97609	2.48822e-07	3.35841e-05	No	meth_hyper_RNA_up	Protein kinase	GO:0005524	ATP binding	XP_004228391.1	AT2G02800.1
Solyc01g010880	SL3.0ch01	6263981	6265981	-	1528	1941	1704	1798	44.047	48.658	4.61063	0.00010682	2.48061	4.08155	1.21434e-06	0.000120987	No	meth_hyper_RNA_up	RING/FYVE/PHD zinc finger superfamily protein	GO:0008270	zinc ion binding	XP_025885605.1	AT3G47550.3
Solyc01g014270	SL3.0ch01	11888252	11890252	+	6706	6344	7373	6023	51.387	55.039	3.65184	4.9914e-09	0.944018	4.38718	0.00242715	0.0463009	Yes	meth_hyper_RNA_up	LETM1-like protein	0	0	XP_004243563.1	0
Solyc01g014390	SL3.0ch01	12867978	12869978	+	4466	5581	5578	5531	44.451	50.212	5.76046	2.39331e-16	7.0936	0.4447	5.7563e-08	1.01926e-05	No	meth_hyper_RNA_up	DNA-directed RNA polymerase subunit beta''	0	0	XP_004238280.1	0
Solyc01g014840	SL3.0ch01	15510115	15512115	-	8431	7132	8661	6663	54.173	56.519	2.34583	3.31113e-05	2.93866	2.97353	0.000790705	0.0197175	Yes	meth_hyper_RNA_up	disease resistance protein (TIR-NBS-LRR class)	GO:0043531	ADP binding	XP_004228809.1	AT5G17680.1
Solyc01g058320	SL3.0ch01	66027263	66029263	+	12216	8948	15045	8952	57.721	62.695	4.97468	4.06443e-26	3.08948	6.05597	9.3753e-08	1.51052e-05	No	meth_hyper_RNA_up	transmembrane protein	0	0	XP_004229022.1	AT3G17120.1
Solyc01g058595	SL3.0ch01	67144679	67146679	-	2780	7193	3897	8478	27.875	31.491	3.61565	7.64039e-09	5.49389	-2.40495	0.00190718	0.0390251	No	meth_hyper_RNA_up	LOW QUALITY:Polyprotein, putative	GO:0046983	protein dimerization activity	XP_010318584.1	0
Solyc01g066760	SL3.0ch01	74757675	74759675	-	6316	8547	7816	9603	42.495	44.871	2.37576	1.83103e-05	8.39463	0.0275624	0.000391308	0.0115481	No	meth_hyper_RNA_up	DNA-directed RNA polymerase subunit beta'	0	0	XP_010313840.1	0
Solyc01g066970	SL3.0ch01	75102735	75104735	-	1306	6862	1484	7044	15.989	17.402	1.41227	0.0090581	3.98479	-0.889765	0.00226427	0.0439199	No	meth_hyper_RNA_up	Flowering promoting factor 1	0	0	XP_004229231.1	AT5G24860.1
Solyc01g079080	SL3.0ch01	78014646	78016646	-	7629	8385	8361	7826	47.64	51.653	4.013	1.63335e-12	6.04777	0.0694692	0.000869373	0.0211536	Yes	meth_hyper_RNA_up	asynaptic protein	0	0	XP_004229554.2	AT2G46980.2
Solyc01g079410	SL3.0ch01	78352130	78354130	-	10742	13478	12791	15177	44.352	45.734	1.38264	0.00114971	3.71698	0.726472	0.00106662	0.0247412	No	meth_hyper_RNA_up	Calcium-dependent phosphotriesterase superfamily protein	0	0	XP_004229387.1	AT2G16760.1
Solyc01g079530	SL3.0ch01	78454782	78456782	-	5032	8624	5099	7771	36.848	39.619	2.771	3.97832e-06	2.98053	1.29405	0.00142415	0.0310225	No	meth_hyper_RNA_up	RING/FYVE/PHD zinc finger superfamily protein	GO:0008270	zinc ion binding	XP_004229398.1	AT1G02610.1
Solyc01g079810	SL3.0ch01	78797770	78799770	+	6327	5271	7252	5059	54.553	58.907	4.35416	2.83833e-11	2.69684	4.62046	1.71368e-05	0.0010098	No	meth_hyper_RNA_up	RING/U-box superfamily protein	GO:0008270	zinc ion binding	XP_004229421.1	AT4G14220.1
Solyc01g080280	SL3.0ch01	79381391	79383391	+	3471	12119	3991	13339	22.264	23.029	0.765157	0.0492006	2.3375	3.2066	0.000902443	0.0217657	No	meth_hyper_RNA_up	chloroplast glutamine synthetase	GO:0004356|GO:0006807	glutamate-ammonia ligase activity | nitrogen compound metabolic process	NP_001310599.1	AT5G35630.1
Solyc01g080500	SL3.0ch01	79586939	79588939	-	6450	6112	7566	6587	51.345	53.459	2.1133	0.000441489	1.224	8.59665	0.000251198	0.00821528	No	meth_hyper_RNA_up	LOW QUALITY:Plant/F10N7-170 protein, putative	0	0	XP_004229479.1	0
Solyc01g081450	SL3.0ch01	80516503	80518503	-	15302	5417	21898	6024	73.855	78.426	4.5707	1.34886e-30	1.12526	7.66188	0.00193482	0.0392761	Yes	meth_hyper_RNA_up	Glycine-rich protein A3	0	0	XP_010323401.1	0
Solyc01g081570	SL3.0ch01	80617621	80619621	+	9908	10112	10603	10245	49.491	50.859	1.36809	0.00375078	1.35731	6.16672	3.31614e-05	0.00168722	No	meth_hyper_RNA_up	carboxyl-terminal peptidase (DUF239)	0	0	XP_004229548.1	AT1G55360.1
Solyc01g073880	SL3.0ch01	81097919	81099919	-	3187	7711	2914	6171	29.244	32.075	2.83095	1.60643e-05	7.23773	-0.43865	0.000176213	0.00619754	No	meth_hyper_RNA_up	LOW QUALITY:Cysteine/Histidine-rich C1 domain family protein	0	0	XP_025884736.1	AT2G44380.1
Solyc01g086640	SL3.0ch01	81491849	81493849	+	2080	8812	2732	9813	19.097	21.778	2.68102	5.50567e-07	2.23178	5.93811	0.000628363	0.0167601	No	meth_hyper_RNA_up	LOW QUALITY:O-fucosyltransferase family protein	0	0	XP_004229593.1	AT2G44500.1
Solyc01g086820	SL3.0ch01	81640254	81642254	-	3834	6576	3746	4702	36.83	44.342	7.51188	1.29438e-24	2.28557	3.55612	0.00192872	0.0391969	Yes	meth_hyper_RNA_up	Histone H3	GO:0046982	protein heterodimerization activity	XP_010324306.1	AT5G65360.1
Solyc01g086960	SL3.0ch01	81750914	81752914	-	4071	7125	4251	6522	36.361	39.46	3.09856	2.64238e-06	1.47712	8.87499	1.98483e-05	0.00113227	No	meth_hyper_RNA_up	Zinc finger A20 and AN1 domain-containing stress-associated protein	GO:0008270	zinc ion binding	NP_001307079.1	AT3G12630.1
Solyc01g087020	SL3.0ch01	81815981	81817981	+	7867	9518	8561	9906	45.252	46.358	1.10672	0.0196889	1.65231	6.84875	0.000148746	0.00541645	Yes	meth_hyper_RNA_up	LOW QUALITY:Transmembrane protein, putative	0	0	XP_010314106.1	0
Solyc01g087540	SL3.0ch01	82355180	82357180	+	2313	8814	3058	10570	20.787	22.439	1.65182	0.00125144	2.25886	5.13564	0.000746769	0.01885	No	meth_hyper_RNA_up	imidazolonepropionase (Protein of unknown function, DUF642)	0	0	XP_004229647.2	AT3G08030.1
Solyc01g087580	SL3.0ch01	82404440	82406440	-	5932	7309	6969	7288	44.8	48.881	4.08101	2.98494e-11	1.78122	5.79375	0.000451838	0.0129291	No	meth_hyper_RNA_up	LOW QUALITY:SNF2 domain-containing protein / helicase domain-containing protein / zinc finger protein-like protein	0	0	XP_004242076.1	AT3G57450.1
Solyc01g087590	SL3.0ch01	82417256	82419256	+	7154	6940	8177	7153	50.759	53.34	2.58067	1.06559e-05	6.97977	4.94897	6.07329e-07	6.91814e-05	No	meth_hyper_RNA_up	Polyamine oxidase	GO:0016491|GO:0055114	oxidoreductase activity | oxidation-reduction process	XP_004229651.1	AT5G13700.1
Solyc01g087820	SL3.0ch01	82575801	82577801	+	15629	7903	18401	8901	66.416	67.398	0.982049	0.0111266	2.54331	4.37524	0.000111743	0.00429306	Yes	meth_hyper_RNA_up	subtilisin-like protease 4B	GO:0004252|GO:0006508	serine-type endopeptidase activity | proteolysis	NP_001311371.1	AT5G67090.1
Solyc01g087840	SL3.0ch01	82587626	82589626	+	0	320	2	123	0	1.6	1.6	0.0398105	2.62552	1.83407	0.000719517	0.018475	No	meth_hyper_RNA_up	Subtilisin-like protease	GO:0004252|GO:0006508	serine-type endopeptidase activity | proteolysis	NP_001317298.1	AT5G67090.1
Solyc01g091910	SL3.0ch01	85326930	85328930	-	6001	6827	5939	5752	46.78	50.8	4.01928	6.7183e-10	2.46647	4.77519	1.77071e-05	0.00103488	Yes	meth_hyper_RNA_up	phospholipase PLDb2	GO:0005515	protein binding	NP_001234108.1	AT2G42010.1
Solyc01g095390	SL3.0ch01	86534967	86536967	+	5410	6371	5264	5839	45.921	47.411	1.48921	0.0138435	1.34027	3.85648	0.000999001	0.0235091	Yes	meth_hyper_RNA_up	Intracellular protein transporter USO1-like protein	0	0	XP_004229967.1	AT5G41620.1
Solyc01g095630	SL3.0ch01	86717110	86719110	-	1094	9087	1328	9330	10.746	12.46	1.71462	0.000104327	1.91067	7.91701	0.00131186	0.0289824	No	meth_hyper_RNA_up	WRKY transcription factor 41	GO:0003700|GO:0006355|GO:0043565	DNA-binding transcription factor activity | regulation of transcription, DNA-templated | sequence-specific DNA binding	NP_001234530.1	AT4G11070.1
Solyc01g096200	SL3.0ch01	87176182	87178182	-	879	7064	807	5682	11.066	12.436	1.37008	0.00703768	3.20727	5.93391	4.13357e-05	0.00203369	No	meth_hyper_RNA_up	U-box domain-containing protein 43	GO:0005515	protein binding	XP_010327229.1	AT5G08510.1
Solyc01g096435	SL3.0ch01	87402454	87404454	-	17	1725	32	1849	0.976	1.701	0.725333	0.0323676	1.72391	4.79683	0.00249793	0.047248	No	meth_hyper_RNA_up	NADPH:quinone oxidoreductase	GO:0016491	oxidoreductase activity	XP_019070382.1	0
Solyc01g096680	SL3.0ch01	87588001	87590001	-	7385	9174	9019	10536	44.598	46.121	1.52309	0.0025561	6.62398	-0.015274	0.000405787	0.0119128	No	meth_hyper_RNA_up	Microtubule associated family protein	GO:0000226|GO:0000910|GO:0008017	microtubule cytoskeleton organization | cytokinesis | microtubule binding	XP_010327410.1	AT2G38720.1
Solyc01g097240	SL3.0ch01	88038180	88040180	-	986	5071	1266	5737	16.279	18.078	1.79928	0.00450216	7.03774	7.30032	1.11566e-05	0.000712588	No	meth_hyper_RNA_up	Pathogenesis-related protein PR-4	GO:0042742|GO:0050832	defense response to bacterium | defense response to fungus	NP_001234083.1	AT3G04720.1
Solyc01g097280	SL3.0ch01	88059539	88061539	-	4870	5940	5212	5749	45.051	47.55	2.49953	0.000183914	8.00566	-0.902022	0.000177846	0.0062426	No	meth_hyper_RNA_up	Pathogenesis-related protein PR-4	GO:0042742|GO:0050832	defense response to bacterium | defense response to fungus	XP_004230092.1	AT3G04720.1
Solyc01g097350	SL3.0ch01	88123487	88125487	-	10209	8131	11586	8873	55.665	56.63	0.965121	0.029729	1.14562	6.56507	0.00205142	0.0409916	Yes	meth_hyper_RNA_up	Calcium-binding EF hand family protein	0	0	XP_004230098.1	AT5G28830.1
Solyc01g098680	SL3.0ch01	88982139	88984139	+	6370	9590	8073	11204	39.912	41.879	1.96664	0.000161732	3.20941	-0.542576	0.00125693	0.0281163	Yes	meth_hyper_RNA_up	LOW QUALITY:Leucine-rich-repeat receptor-like protein	GO:0005515	protein binding	XP_004231263.2	AT4G13920.1
Solyc01g098910	SL3.0ch01	89157371	89159371	-	6249	10229	7839	10983	37.923	41.648	3.72478	2.76486e-12	1.6984	7.15678	0.000735103	0.0186476	No	meth_hyper_RNA_up	Peroxisomal carrier protein	0	0	XP_004230187.1	AT3G05290.1
Solyc01g099370	SL3.0ch01	89534646	89536646	+	2825	8758	3650	9908	24.389	26.921	2.53218	5.38442e-06	2.14927	8.79201	8.62336e-05	0.00353311	Yes	meth_hyper_RNA_up	Calcium-dependent lipid-binding (CaLB domain) family protein	GO:0005515	protein binding	XP_004230221.1	AT1G09070.1
Solyc01g099480	SL3.0ch01	89598073	89600073	+	11267	10148	11575	10031	52.613	53.573	0.960427	0.0249543	2.16323	0.392199	0.00181494	0.0375459	No	meth_hyper_RNA_up	RecQ family ATP-dependent DNA helicase	0	0	XP_010312973.1	0
Solyc01g099510	SL3.0ch01	89615883	89617883	+	1239	8894	1735	11324	12.227	13.286	1.05848	0.010302	2.26976	3.92291	0.000118158	0.00449604	No	meth_hyper_RNA_up	Rhamnogalacturonate lyase family protein	0	0	XP_010313820.2	0
Solyc01g099520	SL3.0ch01	89618615	89620615	-	402	7151	617	8427	5.322	6.822	1.49981	5.8911e-05	2.35711	6.63466	7.17851e-08	1.21009e-05	No	meth_hyper_RNA_up	Rapid alkalinization factor	0	0	XP_010313004.1	AT4G15800.1
Solyc01g100030	SL3.0ch01	89984440	89986440	+	2966	3851	3397	4144	43.509	45.047	1.5382	0.0332937	2.06286	3.41254	0.000445236	0.0127708	Yes	meth_hyper_RNA_up	deoxyuridine triphosphatase	GO:0016787|GO:0046080	hydrolase activity | dUTP metabolic process	NP_001233870.1	AT3G46940.1
Solyc01g101090	SL3.0ch01	90814728	90816728	+	13718	7576	17644	8835	64.422	66.634	2.21203	5.77621e-07	1.51795	5.58334	0.000108485	0.00418959	Yes	meth_hyper_RNA_up	putative plant adhesion protein	0	0	XP_025887650.1	AT5G15930.1
Solyc01g102330	SL3.0ch01	91022041	91024041	-	2052	6434	2527	7013	24.181	26.488	2.30747	0.000313301	1.17523	6.30404	0.00245828	0.0467204	No	meth_hyper_RNA_up	Carbohydrate esterase plant-like protein	0	0	XP_004230370.1	AT3G53010.1
Solyc01g103470	SL3.0ch01	91950106	91952106	-	763	3566	1492	5534	17.625	21.235	3.61009	3.03246e-06	4.24483	3.19495	5.10722e-06	0.000381368	No	meth_hyper_RNA_up	Cytosolic Fe-S cluster assembly factor nar-1	0	0	XP_010326167.1	0
Solyc01g103580	SL3.0ch01	92028292	92030292	+	4280	7738	5130	8012	35.613	39.035	3.42191	3.42279e-08	2.66914	4.3182	6.47526e-06	0.000456756	Yes	meth_hyper_RNA_up	transmembrane protein, putative (DUF679)	0	0	XP_010314524.1	AT4G24310.1
Solyc01g104850	SL3.0ch01	93071228	93073228	+	2568	7988	3053	8053	24.327	27.49	3.16225	1.60438e-07	2.6239	5.53758	0.000996332	0.0234916	No	meth_hyper_RNA_up	Carboxypeptidase	GO:0004185|GO:0006508	serine-type carboxypeptidase activity | proteolysis	XP_010315077.1	AT5G42240.1
Solyc01g106390	SL3.0ch01	94201939	94203939	-	5240	5690	5452	4726	47.941	53.567	5.62507	1.30636e-15	2.81107	6.58918	1.00206e-05	0.000658853	No	meth_hyper_RNA_up	Glutamyl-tRNA reductase	GO:0008883|GO:0055114	glutamyl-tRNA reductase activity | oxidation-reduction process	XP_004230651.1	AT1G58290.1
Solyc01g106600	SL3.0ch01	94310836	94312836	+	1209	2915	1624	3389	29.316	32.396	3.07957	0.00114413	11.8817	1.64845	9.61416e-06	0.000640371	No	meth_hyper_RNA_up	Pathogenesis-related protein 1	GO:0005576	extracellular region	XP_004230668.1	AT4G33720.1
Solyc01g106610	SL3.0ch01	94315073	94317073	+	3750	9609	4619	10543	28.071	30.464	2.39336	9.98906e-06	9.90053	-0.063969	1.26718e-06	0.000125205	Yes	meth_hyper_RNA_up	LEPR1A1A	GO:0005576	extracellular region	NP_001234128.2	AT3G19690.1
Solyc01g106690	SL3.0ch01	94358687	94360687	-	4364	7613	4844	7520	36.437	39.178	2.74176	1.12832e-05	1.66114	7.11704	1.85829e-06	0.00017175	No	meth_hyper_RNA_up	DUF1005 family protein	0	0	XP_004230673.1	AT1G10020.1
Solyc01g107290	SL3.0ch01	94774730	94776730	+	4667	4348	5714	4853	51.769	54.074	2.30473	0.000951051	1.68636	6.65883	0.00220452	0.0431826	No	meth_hyper_RNA_up	RING-H2 finger protein	GO:0005515|GO:0008270	protein binding | zinc ion binding	NP_001308386.1	AT1G49850.1
Solyc01g108210	SL3.0ch01	95462622	95464622	+	2043	3135	2967	3974	39.455	42.746	3.29061	0.000229569	3.13205	1.91101	7.04249e-05	0.0030459	Yes	meth_hyper_RNA_up	Cytochrome P450 family ABA 8'-hydroxylase	GO:0016705|GO:0055114	oxidoreductase activity, acting on paired donors, with incorporation or reduction of molecular oxygen | oxidation-reduction process	XP_004230788.1	AT3G19270.1
Solyc01g109110	SL3.0ch01	96063695	96065695	-	6522	10908	7446	9790	37.418	43.2	5.78203	5.06634e-27	2.58676	7.52234	3.10178e-05	0.00161141	No	meth_hyper_RNA_up	Guanine nucleotide-binding protein alpha-2 subunit	GO:0004871|GO:0007165	obsolete signal transducer activity | signal transduction	XP_004230840.1	AT2G23460.1
Solyc01g109920	SL3.0ch01	96672165	96674165	+	840	3664	1078	4189	18.65	20.467	1.81697	0.0140241	1.51375	5.87219	0.0013706	0.0301128	No	meth_hyper_RNA_up	LOW QUALITY:Dehydrin protein	GO:0006950|GO:0009415	response to stress | response to water	XP_004230933.1	AT4G39130.1
Solyc01g111620	SL3.0ch01	97756969	97758969	-	3838	9154	5207	10404	29.541	33.355	3.81343	1.19786e-11	1.17832	4.63306	0.00065004	0.0172168	No	meth_hyper_RNA_up	high-affinity nickel-transport family protein	0	0	XP_004231046.1	AT2G16800.1
Solyc01g112000	SL3.0ch01	98047263	98049263	+	2124	6294	2477	6847	25.232	26.566	1.33421	0.0232162	3.10144	7.17932	9.04621e-09	2.17158e-06	No	meth_hyper_RNA_up	expansin-like protein precursor 1	GO:0005576|GO:0019953	extracellular region | sexual reproduction	NP_001234736.1	AT3G45970.1
Solyc01g112220	SL3.0ch01	98186238	98188238	-	6361	7751	8034	8040	45.075	49.981	4.90622	7.37143e-17	1.54179	4.29869	0.00196249	0.0395906	No	meth_hyper_RNA_up	Kinase family protein	GO:0005524	ATP binding	XP_004231098.1	AT2G17220.1
Solyc02g043810	SL3.0ch02	1679433	1681433	-	71	4067	143	5021	1.716	2.769	1.05337	0.000612679	4.42054	0.469305	5.01783e-08	9.09773e-06	No	meth_hyper_RNA_up	ENTH/ANTH/VHS superfamily protein	GO:0005545|GO:0030136|GO:0030276|GO:0048268	1-phosphatidylinositol binding | clathrin-coated vesicle | clathrin binding | clathrin coat assembly	XP_004231715.1	AT5G57200.1
Solyc02g005110	SL3.0ch02	6642098	6644098	+	7890	6127	10500	7262	56.289	59.115	2.82617	5.56854e-07	3.25343	2.67447	3.97454e-06	0.000310937	No	meth_hyper_RNA_up	Homeobox leucine-zipper protein	0	0	XP_025887600.1	0
Solyc02g022900	SL3.0ch02	24867960	24869960	+	730	1459	860	1544	33.349	35.774	2.42515	0.0439989	6.73734	-0.924666	4.77766e-05	0.0022565	No	meth_hyper_RNA_up	fatty acid hydroxylase 2	0	0	XP_004233153.1	0
Solyc02g031740	SL3.0ch02	27316135	27318135	+	3299	7342	3656	7524	31.003	32.701	1.69853	0.00458068	1.14023	4.59517	0.00228164	0.0440894	No	meth_hyper_RNA_up	Phloem protein 2	0	0	XP_004231580.1	AT1G31200.1
Solyc02g033040	SL3.0ch02	30182330	30184330	+	6852	7858	6619	7072	46.581	48.346	1.76507	0.00203218	5.48231	-0.576916	0.00164449	0.0348667	No	meth_hyper_RNA_up	LOW QUALITY:F-box associated interaction domain-containing protein	0	0	XP_004247844.1	AT3G23880.1
Solyc02g036480	SL3.0ch02	31318592	31320592	-	8083	8532	9187	9233	48.649	49.875	1.22632	0.0126953	5.89756	4.91839	1.47362e-05	0.000894881	No	meth_hyper_RNA_up	LOW QUALITY:Late embryogenesis abundant (LEA) hydroxyproline-rich glycoprotein family	0	0	XP_010315726.1	AT1G65690.1
Solyc02g063030	SL3.0ch02	35597192	35599192	-	1248	5537	1683	6635	18.394	20.233	1.83971	0.00305381	3.46856	2.95171	9.0342e-05	0.0036638	No	meth_hyper_RNA_up	LuxR family transcriptional regulator, putative	0	0	XP_004233503.1	AT3G02500.1
Solyc02g063220	SL3.0ch02	35820017	35822017	-	1771	12181	1998	12771	12.694	13.528	0.834816	0.020524	1.3081	4.39941	0.00191488	0.0391604	No	meth_hyper_RNA_up	Mannose-6-phosphate isomerase	GO:0004476|GO:0009298	mannose-6-phosphate isomerase activity | GDP-mannose biosynthetic process	XP_004233489.1	AT1G67070.1
Solyc02g064720	SL3.0ch02	36397552	36399552	-	4909	7933	5230	7746	38.226	40.305	2.07905	0.00049469	1.73573	3.67268	0.000189382	0.00653471	Yes	meth_hyper_RNA_up	phototropic-responsive NPH3 family protein	GO:0005515	protein binding	NP_001333526.1	AT5G67385.1
Solyc02g064980	SL3.0ch02	36674135	36676135	-	5055	8023	6846	7115	38.653	49.037	10.3839	1.05018e-64	3.58545	5.0124	4.48522e-05	0.00215714	No	meth_hyper_RNA_up	LOW QUALITY:MAP kinase kinase kinase	GO:0005524	ATP binding	XP_004233440.1	AT5G67080.1
Solyc02g065170	SL3.0ch02	36898127	36900127	+	6630	7691	9302	9173	46.296	50.349	4.05347	9.02842e-13	2.80405	4.99731	1.73492e-05	0.00102064	Yes	meth_hyper_RNA_up	L-ascorbate oxidase like	GO:0055114	oxidation-reduction process	XP_004233429.1	AT5G66920.1
Solyc02g065190	SL3.0ch02	36922095	36924095	-	5366	6348	6114	6828	45.808	47.242	1.4331	0.0139698	7.32677	0.465946	7.1594e-05	0.00307416	Yes	meth_hyper_RNA_up	Cytochrome P450	GO:0016705|GO:0055114	oxidoreductase activity, acting on paired donors, with incorporation or reduction of molecular oxygen | oxidation-reduction process	XP_004233427.1	AT2G45550.1
Solyc02g065470	SL3.0ch02	37186604	37188604	+	4916	6758	6285	7214	42.111	46.559	4.44833	3.6735e-12	1.72415	4.79098	0.000302763	0.00946609	Yes	meth_hyper_RNA_up	pathogenesis-related protein-1-like protein	0	0	XP_010317149.1	AT5G66590.1
Solyc02g065540	SL3.0ch02	37266409	37268409	-	4914	8973	5878	9228	35.386	38.912	3.52608	1.08182e-09	0.98312	4.75828	0.00072946	0.0185847	No	meth_hyper_RNA_up	RING/U-box superfamily protein	GO:0005515|GO:0008270	protein binding | zinc ion binding	XP_004233408.1	AT1G19310.1
Solyc02g065550	SL3.0ch02	37276329	37278329	-	166	1971	224	2115	7.768	9.577	1.80884	0.0187242	2.1332	5.12216	2.95788e-07	3.88632e-05	Yes	meth_hyper_RNA_up	ACI19	0	0	NP_001234771.2	AT2G23790.1
Solyc02g065555	SL3.0ch02	37277916	37279916	-	3717	7532	3828	7145	33.043	34.886	1.84269	0.00259203	2.10029	6.01542	4.4432e-09	1.25137e-06	No	meth_hyper_RNA_up	Calcium uniporter, mitochondrial	0	0	NP_001234771.2	0
Solyc02g065780	SL3.0ch02	37491488	37493488	-	814	5995	984	5800	11.955	14.505	2.54995	1.23117e-05	3.28363	5.29896	0.000197293	0.00673306	No	meth_hyper_RNA_up	LOW QUALITY:RALF-LIKE 27 family protein	0	0	XP_010317137.1	0
Solyc02g067600	SL3.0ch02	38310336	38312336	+	2472	31439	3187	35097	7.29	8.325	1.03496	3.30736e-07	8.04687	-0.948569	0.00050195	0.014104	Yes	meth_hyper_RNA_up	Dehydrin family protein	0	0	XP_004229061.1	0
Solyc02g067750	SL3.0ch02	38432844	38434844	-	1972	6526	2181	6773	23.205	24.358	1.15237	0.0384047	1.37702	5.37484	0.00215907	0.0425023	No	meth_hyper_RNA_up	Carbonic anhydrase	GO:0004089|GO:0008270|GO:0015976	carbonate dehydratase activity | zinc ion binding | carbon utilization	NP_001233847.1	AT3G01500.2
Solyc02g068530	SL3.0ch02	39048517	39050517	+	5931	9717	7398	10596	37.903	41.114	3.2111	3.54168e-09	1.15041	6.23386	9.48929e-05	0.00377965	No	meth_hyper_RNA_up	N-acetylglucosamine-1-phosphate uridylyltransferase 1	GO:0008152|GO:0070569	metabolic process | uridylyltransferase activity	XP_004233254.1	AT2G35020.1
Solyc02g068670	SL3.0ch02	39183485	39185485	+	11544	10324	14670	12461	52.789	54.071	1.28152	0.00313879	5.25472	1.2515	0.00038268	0.011366	No	meth_hyper_RNA_up	Ankyrin repeat family protein	GO:0005515	protein binding	XP_010317038.1	AT3G18670.1
Solyc02g070210	SL3.0ch02	40544762	40546762	-	3027	6687	3651	7327	31.161	33.257	2.09621	0.000949828	5.08058	1.08871	0.0012745	0.0284382	No	meth_hyper_RNA_up	Sec14p-like phosphatidylinositol transfer family protein	GO:0006810|GO:0016021	transport | integral component of membrane	XP_004233146.1	AT1G30690.1
Solyc02g070780	SL3.0ch02	40961681	40963681	-	8537	7641	10437	8486	52.769	55.155	2.38591	8.43682e-06	2.16801	4.049	0.000188171	0.00651547	Yes	meth_hyper_RNA_up	DNA helicase	GO:0003677|GO:0005524|GO:0006260	DNA binding | ATP binding | DNA replication	XP_010316921.1	AT5G46280.1
Solyc02g070877	SL3.0ch02	41044207	41046207	+	2157	11267	2607	12275	16.068	17.518	1.44957	0.000868953	1.41223	4.24511	0.000347732	0.0105583	No	meth_hyper_RNA_up	Conserved peptide upstream open reading frame 35	0	0	XP_004251399.2	0
Solyc02g070890	SL3.0ch02	41054265	41056265	+	543	4497	962	3766	10.774	20.347	9.57306	4.03634e-38	1.77533	4.9474	0.000820828	0.0203039	Yes	meth_hyper_RNA_up	Flagellin Sensing 2 FLS2, a member of the leucine-rich repeat receptor serine/threonine kinase (LRR-RLK) gene family, encodes flagellin (flg) receptor in tomato. It has a binding site for the Pseudomonas syringae-derived flg22 and flg15 peptides.	GO:0005515	protein binding	XP_004233092.1	AT5G46330.1
Solyc02g071490	SL3.0ch02	41478605	41480605	-	47	656	30	185	6.686	13.953	7.26786	0.00124046	1.56857	3.18802	0.00201502	0.0404678	No	meth_hyper_RNA_up	2-oxoglutarate (2OG) and Fe(II)-dependent oxygenase superfamily protein	GO:0016491|GO:0055114	oxidoreductase activity | oxidation-reduction process	XP_004233001.1	AT1G17020.1
Solyc02g071740	SL3.0ch02	41683774	41685774	-	1147	7100	1326	6897	13.908	16.126	2.21741	6.53305e-05	1.69261	4.72154	0.000539893	0.0149792	No	meth_hyper_RNA_up	MAP kinase kinase kinase 16	GO:0005515	protein binding	XP_004232979.1	AT4G18950.1
Solyc02g071990	SL3.0ch02	41886707	41888707	-	9438	10944	10656	11374	46.306	48.37	2.06484	2.11217e-05	1.79674	5.5915	1.38526e-05	0.00084917	No	meth_hyper_RNA_up	Brassinazole-resistant 1 protein	GO:0003700|GO:0006351|GO:0009742	DNA-binding transcription factor activity | transcription, DNA-templated | brassinosteroid mediated signaling pathway	XP_010316857.1	AT1G78700.1
Solyc02g072150	SL3.0ch02	42004874	42006874	-	5664	9905	7593	11045	36.38	40.739	4.35936	6.45149e-16	2.76018	6.42742	5.10016e-07	5.9421e-05	Yes	meth_hyper_RNA_up	Trehalose-6-phosphate synthase, putative	GO:0003824|GO:0005992	catalytic activity | trehalose biosynthetic process	XP_010316843.1	AT1G06410.1
Solyc02g072210	SL3.0ch02	42091037	42093037	+	5151	9115	6076	10076	36.107	37.618	1.51081	0.00426174	1.89334	2.41083	0.00128603	0.0285885	No	meth_hyper_RNA_up	LOW QUALITY:DUF1685 family protein	0	0	XP_010317344.1	AT2G42760.1
Solyc02g077470	SL3.0ch02	42973203	42975203	-	7039	10756	5976	8340	39.556	41.744	2.18745	6.92772e-05	3.71752	5.19815	2.7158e-06	0.000229446	No	meth_hyper_RNA_up	Optic atrophy 3 protein (OPA3)	0	0	XP_010316781.1	AT1G28510.1
Solyc02g078380	SL3.0ch02	43653626	43655626	-	116	1216	157	719	8.709	17.922	9.21367	4.82186e-10	2.46673	6.76232	0.00182942	0.0377799	No	meth_hyper_RNA_up	Stem-specific protein TSJT1	0	0	XP_004232863.1	AT4G27450.1
Solyc02g079570	SL3.0ch02	44646155	44648155	+	2670	8250	3151	8074	24.451	28.071	3.62072	1.88554e-09	2.87981	3.3998	0.00205825	0.0410594	No	meth_hyper_RNA_up	Serine/threonine-protein kinase	GO:0048544	recognition of pollen	XP_019067884.2	AT4G21390.1
Solyc02g079750	SL3.0ch02	44750723	44752723	+	1115	7884	1385	7139	12.39	16.248	3.85797	8.66486e-13	1.43555	5.45662	0.000338378	0.0103526	No	meth_hyper_RNA_up	Quinone reductase family protein	GO:0016491	oxidoreductase activity	XP_004248361.1	AT4G27270.1
Solyc02g079920	SL3.0ch02	44869476	44871476	-	57	2584	101	2799	2.158	3.483	1.32449	0.00238572	3.27227	1.09103	0.000189457	0.00653471	No	meth_hyper_RNA_up	C2H2-like zinc finger protein	GO:0046872	metal ion binding	XP_004232757.1	AT4G27240.1
Solyc02g079970	SL3.0ch02	44896291	44898291	+	2166	8640	2823	10111	20.044	21.826	1.78177	0.00063103	1.06863	6.69313	0.000518789	0.014463	No	meth_hyper_RNA_up	bHLH transcription factor 014	GO:0046983	protein dimerization activity	XP_004232754.1	AT5G54680.1
Solyc02g080040	SL3.0ch02	44931707	44933707	-	2677	5235	3373	5688	33.835	37.225	3.39079	4.87326e-06	3.30128	3.78571	0.000256632	0.0083439	Yes	meth_hyper_RNA_up	Receptor-like kinase	GO:0004672|GO:0006468	protein kinase activity | protein phosphorylation	XP_025885209.1	AT4G23180.1
Solyc02g080050	SL3.0ch02	44932215	44934215	-	2677	5235	3367	5560	33.835	37.717	3.88236	2.32202e-07	3.95112	0.760963	0.00147775	0.0319057	Yes	meth_hyper_RNA_up	Cysteine-rich receptor-kinase-like protein	0	0	XP_004232751.1	AT4G38830.1
Solyc02g080160	SL3.0ch02	45018010	45020010	-	7750	7132	9147	7247	52.076	55.795	3.71847	9.80629e-11	3.69131	2.53444	0.00168055	0.0354213	No	meth_hyper_RNA_up	Xyloglucan endotransglucosylase/hydrolase	GO:0010411|GO:0016762|GO:0042546	xyloglucan metabolic process | xyloglucan:xyloglucosyl transferase activity | cell wall biogenesis	XP_019067894.1	AT1G11545.1
Solyc02g081360	SL3.0ch02	45906493	45908493	+	1753	8386	1949	7964	17.29	19.661	2.37138	1.63358e-05	4.56906	1.71057	0.00178615	0.0370789	No	meth_hyper_RNA_up	CoA ligase	GO:0003824|GO:0008152	catalytic activity | metabolic process	XP_004232666.1	AT1G66120.1
Solyc02g082120	SL3.0ch02	46395064	46397064	+	1013	2985	517	1080	25.338	32.373	7.03553	2.0801e-07	1.51673	2.43832	0.00105538	0.0245441	No	meth_hyper_RNA_up	DNA-3-methyladenine glycosylase, putative	GO:0006284|GO:0008725	base-excision repair | DNA-3-methyladenine glycosylase activity	XP_004232605.1	AT5G44680.1
Solyc02g082610	SL3.0ch02	46812148	46814148	+	7779	8813	8588	8138	46.884	51.345	4.46117	1.46149e-15	1.86096	1.71879	0.00139083	0.0305011	No	meth_hyper_RNA_up	Proliferating cell nuclear antigen	0	0	XP_004249034.1	0
Solyc02g083360	SL3.0ch02	47356717	47358717	+	3380	9727	4420	11529	25.788	27.713	1.92559	0.000192372	1.22489	4.67865	0.00105466	0.0245433	No	meth_hyper_RNA_up	methionine-S-oxide reductase	GO:0033743|GO:0055114	peptide-methionine (R)-S-oxide reductase activity | oxidation-reduction process	XP_004232526.1	AT2G17705.1
Solyc02g083850	SL3.0ch02	47673792	47675792	-	1853	9626	2424	11397	16.143	17.539	1.39601	0.00218644	1.61817	4.57868	0.000358759	0.0107833	No	meth_hyper_RNA_up	Calcium-dependent protein kinase	GO:0005524	ATP binding	XP_004232492.1	AT2G17890.1
Solyc02g083860	SL3.0ch02	47679181	47681181	-	6884	7181	7260	6880	48.944	51.344	2.39952	5.28984e-05	2.28271	3.32172	0.000943157	0.0225199	Yes	meth_hyper_RNA_up	flavanone 3-dioxygenase	GO:0016491|GO:0055114	oxidoreductase activity | oxidation-reduction process	NP_001316412.1	AT3G51240.1
Solyc02g084037	SL3.0ch02	47815863	47817863	-	744	2203	5573	6766	25.246	45.166	19.9197	7.12162e-89	6.86103	-0.286793	4.41638e-05	0.00213988	No	meth_hyper_RNA_up	stress response NST1-like protein	0	0	XP_025885257.1	0
Solyc02g084120	SL3.0ch02	47870279	47872279	-	266	2311	2309	4954	10.322	31.791	21.4692	2.11003e-112	4.42864	-2.00441	0.00229047	0.0442124	No	meth_hyper_RNA_up	ATP-dependent Clp protease ATP-binding subunit ClpX	GO:0005524|GO:0006457|GO:0051082	ATP binding | protein folding | unfolded protein binding	XP_010316420.1	AT5G53350.1
Solyc02g084130	SL3.0ch02	47880688	47882688	-	1637	5483	2826	6694	22.992	29.685	6.6933	2.30989e-21	4.1727	0.870087	0.00164825	0.0348857	No	meth_hyper_RNA_up	uridine kinase-like 5	0	0	XP_010316420.1	0
Solyc02g084200	SL3.0ch02	47933849	47935849	-	6760	4340	10960	5744	60.901	65.613	4.71213	4.97065e-15	4.14256	0.204881	3.77427e-06	0.000299331	Yes	meth_hyper_RNA_up	Zinc finger transcription factor 19	GO:0046872	metal ion binding	XP_010316414.1	AT1G19860.1
Solyc02g084210	SL3.0ch02	47933250	47935250	+	6856	7043	11044	8368	49.327	56.893	7.56535	4.37774e-41	6.15345	1.65064	0.000729956	0.0185847	Yes	meth_hyper_RNA_up	GDP-mannose 4,6 dehydratase 1	GO:0008446|GO:0019673	GDP-mannose 4,6-dehydratase activity | GDP-mannose metabolic process	XP_004232477.1	AT5G66280.1
Solyc02g084570	SL3.0ch02	48288482	48290482	-	1373	4514	2537	3419	23.323	42.596	19.2731	2.11016e-109	6.88357	-0.702257	0.000252994	0.00826401	No	meth_hyper_RNA_up	Cytochrome P450 family protein	GO:0016705|GO:0055114	oxidoreductase activity, acting on paired donors, with incorporation or reduction of molecular oxygen | oxidation-reduction process	XP_004232458.1	AT4G36220.1
Solyc02g084850	SL3.0ch02	48564178	48566178	-	1370	3038	3966	5213	31.08	43.207	12.1275	4.1966e-41	5.73538	2.35956	0.000607764	0.0163782	No	meth_hyper_RNA_up	Abscisic acid and environmental stress-inducible protein TAS14	GO:0006950|GO:0009415	response to stress | response to water	NP_001234038.1	0
Solyc02g084900	SL3.0ch02	48595932	48597932	-	561	4385	3060	8085	11.342	27.456	16.1138	8.44404e-122	2.35986	5.15224	2.05678e-08	4.17994e-06	No	meth_hyper_RNA_up	P-loop containing nucleoside triphosphate hydrolases superfamily protein	GO:0005524	ATP binding	XP_004232432.1	AT2G18193.1
Solyc02g085010	SL3.0ch02	48681470	48683470	-	2167	3482	4373	6175	38.361	41.458	3.09732	0.000112164	3.52615	4.94949	2.93324e-06	0.000245705	No	meth_hyper_RNA_up	histone-lysine N-methyltransferase, H3 lysine-9 specific SUVH3-like protein	0	0	XP_004232425.2	AT2G18210.1
Solyc02g085140	SL3.0ch02	48758415	48760415	-	11574	6516	16101	7125	63.98	69.323	5.34307	3.2687e-29	1.48066	5.33492	0.000278145	0.00891461	Yes	meth_hyper_RNA_up	U-box domain-containing family protein	GO:0005488	binding	XP_010316375.1	AT4G36550.1
Solyc02g085660	SL3.0ch02	49129350	49131350	-	3128	7693	5697	10323	28.907	35.562	6.65504	3.63662e-29	2.70599	2.02991	0.00100385	0.023591	No	meth_hyper_RNA_up	Glycosyltransferase	GO:0008152|GO:0016758	metabolic process | transferase activity, transferring hexosyl groups	XP_004233715.1	AT3G50740.1
Solyc02g085730	SL3.0ch02	49167183	49169183	+	4093	6435	7596	9805	38.877	43.653	4.77538	1.44975e-14	1.97786	5.84588	3.30468e-08	6.29367e-06	No	meth_hyper_RNA_up	allene oxide cyclase	GO:0009507|GO:0016853	chloroplast | isomerase activity	NP_001234019.1	AT1G13280.1
Solyc02g086370	SL3.0ch02	49666519	49668519	+	5573	8630	7979	9908	39.238	44.608	5.36963	2.50377e-21	1.62303	3.2747	9.45805e-05	0.00377885	Yes	meth_hyper_RNA_up	Lipid phosphate phosphatase-like protein	0	0	XP_010316313.1	AT3G02600.1
Solyc02g087000	SL3.0ch02	50194534	50196534	+	2808	4637	3728	4707	37.717	44.197	6.48021	5.13885e-16	1.4344	4.56155	0.000120595	0.00456934	No	meth_hyper_RNA_up	Potassium transporter	GO:0015079|GO:0016020|GO:0071805	potassium ion transmembrane transporter activity | membrane | potassium ion transmembrane transport	XP_004232287.1	AT5G14880.1
Solyc02g087720	SL3.0ch02	50676901	50678901	-	7802	7734	10270	8374	50.219	55.085	4.8659	1.53147e-18	1.06698	5.10757	0.000253843	0.0082828	Yes	meth_hyper_RNA_up	LOW QUALITY:transmembrane protein	0	0	XP_010316260.1	AT3G28720.1
Solyc02g087770	SL3.0ch02	50709102	50711102	+	14254	6615	15381	6818	68.302	69.287	0.984638	0.0158312	1.51567	5.20667	0.0014118	0.0308017	Yes	meth_hyper_RNA_up	Aldose 1-epimerase	GO:0016853|GO:0019318	isomerase activity | hexose metabolic process	XP_019067993.1	AT5G15140.1
Solyc02g087870	SL3.0ch02	50782613	50784613	-	2844	6932	3617	8178	29.092	30.666	1.57388	0.00738438	1.59792	4.57462	0.000833413	0.0204876	No	meth_hyper_RNA_up	ABC transporter B family protein	GO:0005524|GO:0016887	ATP binding | ATPase activity	NP_001234209.1	AT3G28860.1
Solyc02g088240	SL3.0ch02	51040775	51042775	-	2950	6011	3419	5110	32.92	40.087	7.16633	4.85103e-22	3.61221	5.5064	0.000113601	0.00434113	No	meth_hyper_RNA_up	Phosphate transporter PHO1-like protein	GO:0016021	integral component of membrane	XP_004232204.1	AT3G29060.1
Solyc02g088690	SL3.0ch02	51319965	51321965	-	5695	10508	6545	10641	35.148	38.083	2.93551	4.23779e-08	2.08398	7.30595	7.2621e-05	0.00310336	No	meth_hyper_RNA_up	UDP-glucose 6-dehydrogenase family protein	GO:0055114	oxidation-reduction process	XP_004232174.1	AT3G29360.1
Solyc02g088740	SL3.0ch02	51359136	51361136	+	4234	6639	4885	6924	38.94	41.367	2.42626	0.000172915	1.87784	2.34052	0.00153087	0.0328471	Yes	meth_hyper_RNA_up	LOW QUALITY:Transcription factor bHLH151, putative	0	0	XP_010323626.1	AT3G29370.1
Solyc02g088900	SL3.0ch02	51466279	51468279	-	7874	7832	10146	8822	50.134	53.49	3.35638	9.74385e-10	5.50383	-0.268562	0.00212175	0.0419517	No	meth_hyper_RNA_up	Nucleotide-sugar transporter family protein	0	0	XP_010316218.1	AT3G17430.1
Solyc02g089065	SL3.0ch02	51605789	51607789	+	3563	5156	5483	7227	40.865	43.139	2.27448	0.000707989	1.13341	8.34395	0.00232508	0.0446984	No	meth_hyper_RNA_up	SPIRAL1-like1	0	0	XP_004232154.1	0
Solyc02g089440	SL3.0ch02	51900315	51902315	+	878	1296	994	1234	40.386	44.614	4.22762	0.00304587	1.44688	6.52736	4.76541e-05	0.0022565	No	meth_hyper_RNA_up	glycosyltransferase family protein	GO:0047262	polygalacturonate 4-alpha-galacturonosyltransferase activity	NP_001316709.1	AT3G02350.1
Solyc02g089480	SL3.0ch02	51932612	51934612	-	679	8461	1146	10099	7.429	10.191	2.76231	1.33204e-11	2.95683	0.982767	7.55599e-05	0.0032031	No	meth_hyper_RNA_up	Glutamine dumper 2, putative	0	0	XP_004233655.1	AT4G25760.1
Solyc02g089490	SL3.0ch02	51938156	51940156	+	12500	8461	15004	8093	59.635	64.961	5.32626	1.14998e-29	1.60079	3.59163	0.00165891	0.0350892	No	meth_hyper_RNA_up	Plant Tudor-like RNA-binding protein	0	0	XP_025888279.1	0
Solyc02g089610	SL3.0ch02	52006969	52008969	-	87	4904	128	5359	1.743	2.333	0.589649	0.0209086	2.38439	8.186	2.39902e-07	3.25527e-05	Yes	meth_hyper_RNA_up	S-adenosylmethionine decarboxylase 2	GO:0004014|GO:0008295	adenosylmethionine decarboxylase activity | spermidine biosynthetic process	XP_019067510.1	AT3G25570.1
Solyc02g089640	SL3.0ch02	52031934	52033934	-	7016	9240	8434	10006	43.159	45.738	2.57808	1.76855e-06	2.73388	8.64334	2.01041e-06	0.000181586	No	meth_hyper_RNA_up	cellulose-synthase-like	0	0	NP_001316710.1	AT3G28180.1
Solyc02g089685	SL3.0ch02	52072614	52074614	+	542	3236	800	2986	14.346	21.13	6.78427	3.69112e-14	1.64635	3.31944	0.00171413	0.0359451	Yes	meth_hyper_RNA_up	Phytochrome	0	0	XP_019070846.1	0
Solyc02g090360	SL3.0ch02	52558328	52560328	-	5955	7061	6734	6473	45.751	50.988	5.23673	9.75118e-17	3.14629	8.6442	3.57886e-06	0.000285733	Yes	meth_hyper_RNA_up	L-ascorbate oxidase like	GO:0055114	oxidation-reduction process	XP_004232058.1	AT5G66920.1
Solyc02g090560	SL3.0ch02	52736988	52738988	-	701	3866	586	2523	15.349	18.849	3.49926	6.15978e-05	2.29025	2.07745	0.00189819	0.0389079	No	meth_hyper_RNA_up	Calcium-transporting ATPase	GO:0000166	nucleotide binding	XP_004233637.1	AT3G63380.1
Solyc02g090970	SL3.0ch02	53059907	53061907	+	1906	4666	2146	4866	29.002	30.605	1.60285	0.0230831	2.93385	4.60778	9.30989e-06	0.000624667	No	meth_hyper_RNA_up	MAP kinase kinase kinase 21	GO:0005524	ATP binding	XP_004232023.1	AT4G36950.1
Solyc02g090980	SL3.0ch02	53068221	53070221	+	3989	5379	3973	5035	42.581	44.105	1.52411	0.0210102	3.13936	1.26795	0.000756738	0.0190747	No	meth_hyper_RNA_up	MAP kinase kinase kinase 22	GO:0005524	ATP binding	XP_004233627.1	AT4G36950.1
Solyc02g091260	SL3.0ch02	53252135	53254135	-	7058	11398	9198	12106	38.242	43.175	4.93268	1.26372e-22	3.09243	-0.280098	0.00258002	0.048442	No	meth_hyper_RNA_up	LOW QUALITY:mediator of RNA polymerase II transcription subunit	0	0	XP_010321160.1	AT2G01300.1
Solyc02g091500	SL3.0ch02	53415351	53417351	+	10326	7198	11476	7259	58.925	61.254	2.32943	6.80604e-06	1.95458	6.44615	2.63491e-05	0.00142802	No	meth_hyper_RNA_up	Calcium binding protein	GO:0005509	calcium ion binding	XP_004231987.1	AT5G37770.1
Solyc02g091730	SL3.0ch02	53608621	53610621	+	12255	8883	16095	10237	57.976	61.123	3.14719	9.83433e-12	2.01361	4.39851	0.00173489	0.0362886	No	meth_hyper_RNA_up	Chromatin SPT2	0	0	XP_025885608.1	AT2G22720.2
Solyc02g092000	SL3.0ch02	53861159	53863159	-	38	2763	64	3054	1.357	2.053	0.695939	0.024272	1.86425	5.78509	1.67261e-05	0.000992137	No	meth_hyper_RNA_up	transmembrane protein	0	0	XP_010316041.1	AT3G49720.1
Solyc02g092450	SL3.0ch02	54134938	54136938	+	8168	6033	7947	4505	57.517	63.821	6.304	7.33407e-25	4.02561	3.26496	5.79242e-06	0.00041603	Yes	meth_hyper_RNA_up	Calcium-transporting ATPase	GO:0016021	integral component of membrane	XP_004231919.1	AT4G37640.1
Solyc02g092800	SL3.0ch02	54405963	54407963	-	570	4699	677	4374	10.818	13.403	2.58529	5.40475e-05	1.21708	4.86331	0.00163336	0.0346718	Yes	meth_hyper_RNA_up	metal transporter AY196092	GO:0005215|GO:0006810|GO:0016020	transporter activity | transport | membrane	NP_001233770.1	AT2G23150.1
Solyc02g092890	SL3.0ch02	54474405	54476405	+	324	5484	900	6657	5.579	11.909	6.33098	1.31946e-36	10.28	1.57434	2.17262e-05	0.00121044	No	meth_hyper_RNA_up	LOW QUALITY:Transmembrane protein, putative	0	0	YP_009430475.1	0
Solyc02g092990	SL3.0ch02	54588989	54590989	+	716	6945	877	6323	9.346	12.181	2.83452	3.79502e-08	1.71894	6.09972	0.000179894	0.00629358	No	meth_hyper_RNA_up	F-box protein	GO:0005515	protein binding	XP_004231878.1	AT1G47056.1
Solyc02g094100	SL3.0ch02	55370618	55372618	+	11063	8167	13376	8794	57.53	60.334	2.80388	1.2299e-08	2.56062	1.51605	0.000929661	0.022272	Yes	meth_hyper_RNA_up	Katanin p60 ATPase-containing subunit A1	GO:0005524	ATP binding	XP_019068110.1	AT3G27120.1
Solyc02g094220	SL3.0ch02	55452738	55454738	+	11094	7036	13977	7768	61.191	64.277	3.08545	4.71131e-10	1.27711	5.14302	0.000914015	0.0220151	No	meth_hyper_RNA_up	transmembrane protein, putative (DUF 3339)	0	0	XP_004231770.1	AT3G27030.1
Solyc03g006500	SL3.0ch03	1077181	1079181	+	3991	5044	5782	5807	44.173	49.892	5.71948	1.34836e-15	1.1221	4.53662	0.00182558	0.0377224	Yes	meth_hyper_RNA_up	Kinase family protein	GO:0005524	ATP binding	XP_025886142.1	AT3G09010.1
Solyc03g006620	SL3.0ch03	1195390	1197390	+	1951	10340	2365	11193	15.873	17.444	1.57017	0.000570687	3.53493	5.34721	1.30407e-09	4.16463e-07	No	meth_hyper_RNA_up	Cotton fiber expressed protein	0	0	XP_004234132.1	AT1G61260.1
Solyc03g006970	SL3.0ch03	1530765	1532765	-	7249	8836	7490	8483	45.067	46.892	1.8248	0.000796681	4.18704	0.893641	1.83581e-05	0.00106769	No	meth_hyper_RNA_up	serine protease SBT2	GO:0004252|GO:0006508	serine-type endopeptidase activity | proteolysis	NP_001234288.1	AT5G51750.1
Solyc03g007210	SL3.0ch03	1776909	1778909	+	7376	5377	9814	5669	57.837	63.386	5.54828	1.28637e-20	1.87989	5.6594	2.87732e-05	0.00152242	Yes	meth_hyper_RNA_up	Receptor-like protein kinase	GO:0005524	ATP binding	XP_004234168.1	AT5G38280.1
Solyc03g007220	SL3.0ch03	1781276	1783276	+	6742	3314	8051	3474	67.045	69.857	2.81228	1.02934e-05	2.4607	3.42901	0.000353073	0.0106558	Yes	meth_hyper_RNA_up	Membrane receptor-like protein 1	0	0	XP_004234949.1	0
Solyc03g007380	SL3.0ch03	1927428	1929428	+	3511	8638	4571	10483	28.899	30.364	1.46452	0.00557603	11.4318	2.5152	6.18759e-10	2.25834e-07	No	meth_hyper_RNA_up	WRKY transcription factor 52	GO:0003700|GO:0006355|GO:0043565	DNA-binding transcription factor activity | regulation of transcription, DNA-templated | sequence-specific DNA binding	XP_004234275.1	AT4G11070.1
Solyc03g007720	SL3.0ch03	2253215	2255215	-	8149	8992	10029	10234	47.541	49.494	1.95317	0.000147037	6.12735	-0.578152	0.000537769	0.0149455	No	meth_hyper_RNA_up	Membrane-associated kinase regulator, putative	0	0	XP_010317497.1	AT1G64080.1
Solyc03g025170	SL3.0ch03	2653523	2655523	-	2462	6910	3035	8020	26.27	27.454	1.1839	0.0301314	1.46887	7.0296	1.64635e-06	0.000155784	No	meth_hyper_RNA_up	gras10	0	0	NP_001234327.1	AT5G52510.1
Solyc03g025230	SL3.0ch03	2710637	2712637	+	12765	8761	16329	9144	59.3	64.103	4.80279	1.28107e-25	1.40386	3.12494	0.000647236	0.0171611	No	meth_hyper_RNA_up	Multidrug resistance protein mdtK	GO:0006855|GO:0015238|GO:0015297|GO:0016020|GO:0055085	drug transmembrane transport | antiporter activity | membrane | transmembrane transport	XP_004234432.1	AT4G25640.2
Solyc03g026210	SL3.0ch03	3637779	3639779	-	1795	7708	1946	6303	18.889	23.591	4.70197	6.69667e-14	1.95432	3.55147	0.000357803	0.0107636	No	meth_hyper_RNA_up	Dihydrodipicolinate reductase-like protein	GO:0008839|GO:0009089|GO:0055114	4-hydroxy-tetrahydrodipicolinate reductase | lysine biosynthetic process via diaminopimelate | oxidation-reduction process	XP_004234357.1	AT5G52100.1
Solyc03g026220	SL3.0ch03	3653792	3655792	+	241	10264	375	9699	2.294	3.722	1.42831	3.55711e-09	1.16536	6.98215	0.00155691	0.033306	No	meth_hyper_RNA_up	BAG family molecular chaperone regulator-like protein	GO:0051087	chaperone binding	XP_004234356.1	AT5G52060.1
Solyc03g026230	SL3.0ch03	3694115	3696115	-	3113	6149	4281	7213	33.61	37.246	3.63507	7.94041e-08	6.61562	3.24025	3.58924e-07	4.60143e-05	No	meth_hyper_RNA_up	Protein DETOXIFICATION	GO:0006855|GO:0015238|GO:0015297|GO:0016020|GO:0055085	drug transmembrane transport | antiporter activity | membrane | transmembrane transport	XP_004234355.1	AT4G23030.1
Solyc03g026280	SL3.0ch03	3738512	3740512	+	781	7093	928	6827	9.919	11.966	2.04775	4.30673e-05	3.01401	7.41287	6.53165e-06	0.000458987	No	meth_hyper_RNA_up	CBF	GO:0003700|GO:0006355	DNA-binding transcription factor activity | regulation of transcription, DNA-templated	NP_001234123.1	AT4G25480.1
Solyc03g033540	SL3.0ch03	5109244	5111244	-	8354	8038	8054	6782	50.964	54.287	3.32298	7.6351e-09	3.05557	7.1897	3.37333e-08	6.38398e-06	No	meth_hyper_RNA_up	calcium-dependent protein kinase2	GO:0005524	ATP binding	NP_001234607.1	AT2G17890.1
Solyc03g034230	SL3.0ch03	5962226	5964226	-	9071	7224	10107	7449	55.667	57.57	1.90268	0.000341759	3.11882	3.15539	3.66013e-07	4.65892e-05	Yes	meth_hyper_RNA_up	translocase subunit seca	0	0	XP_004234569.1	AT3G02555.1
Solyc03g034375	SL3.0ch03	6229037	6231037	-	4482	6893	5665	6738	39.402	45.674	6.27224	1.02049e-21	3.91205	1.40836	0.00129959	0.0288003	No	meth_hyper_RNA_up	Lipid transfer protein	GO:0006869	lipid transport	XP_004234577.1	0
Solyc03g043700	SL3.0ch03	7244083	7246083	-	12758	11101	15221	11528	53.472	56.903	3.43058	3.10895e-14	2.73855	3.26325	0.00115352	0.0262963	Yes	meth_hyper_RNA_up	U-box domain-containing protein	GO:0005515	protein binding	XP_004234710.1	AT3G03440.1
Solyc03g044180	SL3.0ch03	8428699	8430699	+	2011	4445	2883	5522	31.149	34.301	3.15169	4.80506e-05	11.1036	2.08409	1.89607e-05	0.00109382	No	meth_hyper_RNA_up	Transmembrane protein, putative	0	0	XP_019070303.1	AT4G37290.1
Solyc03g051970	SL3.0ch03	23482627	23484627	-	7639	7205	8944	7626	51.462	53.977	2.5152	9.24125e-06	1.02515	5.39267	0.00255788	0.0481273	No	meth_hyper_RNA_up	Dihydrosphingosine 1-phosphate phosphatase	0	0	XP_004234755.1	AT3G58490.1
Solyc03g058430	SL3.0ch03	26703466	26705466	-	6709	5717	6128	4194	53.992	59.368	5.37671	1.50059e-15	8.08181	-0.48523	5.72151e-06	0.000412595	Yes	meth_hyper_RNA_up	Fatty acid desaturase	GO:0016717|GO:0055114	oxidoreductase activity, acting on paired donors, with oxidation of a pair of donors resulting in the reduction of molecular oxygen to two molecules of water | oxidation-reduction process	XP_025885634.1	AT3G12120.1
Solyc03g065340	SL3.0ch03	43656419	43658419	+	13633	7711	18057	7611	63.873	70.348	6.47554	9.69722e-49	1.65208	8.33954	3.94376e-07	4.91499e-05	No	meth_hyper_RNA_up	Alpha-1,4 glucan phosphorylase	GO:0005975|GO:0008184	carbohydrate metabolic process | glycogen phosphorylase activity	XP_004234848.1	AT3G29320.1
Solyc03g078780	SL3.0ch03	52883714	52885714	-	6397	7731	7226	8123	45.279	47.078	1.79911	0.0014357	3.85989	1.50168	0.000681039	0.0178196	Yes	meth_hyper_RNA_up	UDP-glycosyltransferase	GO:0008152|GO:0016758	metabolic process | transferase activity, transferring hexosyl groups	XP_004235054.1	AT3G11340.1
Solyc03g081300	SL3.0ch03	53610908	53612908	-	23	1014	101	393	2.218	20.445	18.2274	5.88102e-31	1.50048	5.54823	0.000342661	0.0104398	No	meth_hyper_RNA_up	Mitochondrial transcription termination factor-related family protein	GO:0003690|GO:0006355	double-stranded DNA binding | regulation of transcription, DNA-templated	XP_004235022.1	AT5G54180.1
Solyc03g082500	SL3.0ch03	53849862	53851862	+	5061	9613	6401	10195	34.49	38.57	4.07996	2.44671e-13	1.31514	5.37575	7.06074e-05	0.00304671	Yes	meth_hyper_RNA_up	serine/threonine protein kinase pk23	GO:0005524	ATP binding	NP_001234146.1	AT5G24430.1
Solyc03g082530	SL3.0ch03	53889538	53891538	-	5774	4314	6268	4410	57.236	58.7	1.46381	0.018663	2.03272	6.0959	0.000885846	0.0214813	Yes	meth_hyper_RNA_up	Small auxin up-regulated RNA37	GO:0009733	response to auxin	XP_004235010.1	AT4G00880.1
Solyc03g082600	SL3.0ch03	53956170	53958170	-	9975	8460	12415	8980	54.109	58.028	3.91854	1.43006e-14	1.03517	6.85132	0.000524244	0.0146037	No	meth_hyper_RNA_up	Cytochrome b5	GO:0020037	heme binding	NP_001295128.1	AT5G53560.1
Solyc03g083010	SL3.0ch03	54276220	54278220	+	2060	3968	2731	4449	34.174	38.036	3.86236	4.82657e-06	2.14695	4.21071	7.70203e-05	0.00324866	No	meth_hyper_RNA_up	Hydrolase, alpha/beta fold family protein	0	0	XP_004234977.1	AT5G53050.2
Solyc03g083470	SL3.0ch03	54788243	54790243	-	5462	7296	5371	6804	42.812	44.115	1.30264	0.020987	6.79094	3.52032	1.4147e-06	0.00013713	No	meth_hyper_RNA_up	Receptor-like kinase	GO:0005524	ATP binding	XP_004235104.1	AT1G66920.2
Solyc03g083680	SL3.0ch03	55069896	55071896	+	5237	8322	6680	9687	38.624	40.814	2.19004	0.000106928	11.5808	2.72505	3.05506e-09	9.10613e-07	No	meth_hyper_RNA_up	LOW QUALITY:P-loop containing nucleoside triphosphate hydrolases superfamily protein	0	0	0	0
Solyc03g083960	SL3.0ch03	55328265	55330265	-	11163	5119	12161	4746	68.56	71.929	3.36841	4.67017e-11	4.52443	3.36509	7.74847e-05	0.00325764	No	meth_hyper_RNA_up	Trehalose 6-phosphate phosphatase	GO:0003824|GO:0005992	catalytic activity | trehalose biosynthetic process	XP_025885725.1	AT5G51460.3
Solyc03g093080	SL3.0ch03	55696772	55698772	-	6652	7964	7695	8353	45.512	47.95	2.43813	1.93873e-05	4.22481	8.26819	1.69613e-08	3.52716e-06	Yes	meth_hyper_RNA_up	Xyloglucan endotransglucosylase/hydrolase	GO:0010411|GO:0016762|GO:0042546	xyloglucan metabolic process | xyloglucan:xyloglucosyl transferase activity | cell wall biogenesis	XP_004235156.1	AT4G25810.1
Solyc03g093110	SL3.0ch03	55713947	55715947	-	6010	6831	7285	7256	46.803	50.1	3.29651	7.87348e-08	4.28288	7.0054	2.93654e-08	5.67752e-06	Yes	meth_hyper_RNA_up	xyloglucan endotransglucosylase-hydrolase	GO:0010411|GO:0016762|GO:0042546	xyloglucan metabolic process | xyloglucan:xyloglucosyl transferase activity | cell wall biogenesis	XP_004235157.1	AT4G25810.1
Solyc03g093360	SL3.0ch03	56058056	56060056	+	5295	10040	6776	12201	34.529	35.706	1.17753	0.0135507	1.86691	7.60638	0.000858451	0.0209448	No	meth_hyper_RNA_up	PLAT domain-containing protein 1	GO:0005515	protein binding	XP_004235174.1	AT4G39730.1
Solyc03g093890	SL3.0ch03	56977668	56979668	-	1264	7131	1381	6964	15.057	16.549	1.49225	0.00539621	3.8908	2.94674	0.000290762	0.00917914	No	meth_hyper_RNA_up	R2R3MYB transcription factor 52	GO:0003677	DNA binding	NP_001333764.1	AT3G23250.1
Solyc03g094120	SL3.0ch03	57303071	57305071	-	8470	7847	10836	8809	51.909	55.159	3.25002	1.47702e-09	8.27678	1.24602	0.000169765	0.00602994	No	meth_hyper_RNA_up	Glycosyltransferase	0	0	XP_010318206.1	AT1G28710.1
Solyc03g094145	SL3.0ch03	57404432	57406432	+	4354	3619	5109	3787	54.609	57.43	2.821	0.000193968	2.15427	2.24028	0.00166823	0.0352655	No	meth_hyper_RNA_up	Lysine--tRNA ligase	0	0	NP_001234285.1	0
Solyc03g094160	SL3.0ch03	57487367	57489367	+	9909	9371	11500	9846	51.395	53.874	2.47903	7.54342e-07	1.84536	6.35412	0.000149666	0.00543479	Yes	meth_hyper_RNA_up	metacaspase 1	0	0	XP_004235205.1	AT1G02170.1
Solyc03g095770	SL3.0ch03	58399677	58401677	+	11606	6555	12659	6612	63.906	65.689	1.78321	0.000255056	1.72638	6.5332	0.000474833	0.0134971	No	meth_hyper_RNA_up	WRKY transcription factor 80	GO:0003700|GO:0006355|GO:0043565	DNA-binding transcription factor activity | regulation of transcription, DNA-templated | sequence-specific DNA binding	XP_004235231.1	AT3G56400.1
Solyc03g096550	SL3.0ch03	60134896	60136896	+	1943	3390	1889	2942	36.434	39.102	2.66811	0.00369604	6.08751	3.30201	6.65634e-05	0.00291056	No	meth_hyper_RNA_up	PLAT domain-containing protein 1	GO:0005515	protein binding	XP_004235262.1	AT4G39730.1
Solyc03g097170	SL3.0ch03	60925604	60927604	+	11754	10728	10746	9028	52.282	54.344	2.06226	2.32071e-05	2.73223	2.38433	0.000838818	0.0205895	Yes	meth_hyper_RNA_up	Cinnamoyl-CoA reductase, putative	GO:0003854|GO:0006694|GO:0016616|GO:0055114	3-beta-hydroxy-delta5-steroid dehydrogenase activity | steroid biosynthetic process | oxidoreductase activity, acting on the CH-OH group of donors, NAD or NADP as acceptor | oxidation-reduction process	XP_004235331.1	AT2G23910.1
Solyc03g097340	SL3.0ch03	61080470	61082470	+	2920	5162	4202	5722	36.13	42.342	6.21213	9.98108e-17	1.12487	5.10803	0.000732173	0.0186129	Yes	meth_hyper_RNA_up	WD40 repeat protein	GO:0005515	protein binding	XP_004235332.1	AT5G24520.1
Solyc03g097380	SL3.0ch03	61150075	61152075	+	2134	8325	2914	9257	20.403	23.942	3.53868	3.74626e-10	3.66883	0.82293	0.00190104	0.0389217	No	meth_hyper_RNA_up	Heavy metal transport/detoxification superfamily protein	GO:0030001|GO:0046872	metal ion transport | metal ion binding	XP_004235318.1	AT5G63530.1
Solyc03g097630	SL3.0ch03	61396100	61398100	+	1573	11490	2288	12835	12.042	15.129	3.08763	1.58007e-13	2.08957	5.90539	2.14816e-06	0.000190658	No	meth_hyper_RNA_up	S-acyltransferase	0	0	XP_004235323.1	AT3G26935.1
Solyc03g098660	SL3.0ch03	62392291	62394291	+	45	1639	84	2062	2.672	3.914	1.24205	0.020676	2.73113	4.64516	0.00176353	0.0366945	No	meth_hyper_RNA_up	GRAM domain protein/ABA-responsive-like protein	0	0	XP_004235408.1	AT5G08350.1
Solyc03g098680	SL3.0ch03	62399657	62401657	-	483	6900	568	6303	6.542	8.267	1.72457	8.10434e-05	9.10894	-0.301463	0.000225826	0.00752082	No	meth_hyper_RNA_up	Kunitz trypsin inhibitor	GO:0004866	endopeptidase inhibitor activity	XP_004235490.1	AT1G73325.1
Solyc03g020010	SL3.0ch03	62687174	62689174	-	70	445	47	153	13.592	23.5	9.90777	0.00156226	9.97094	0.118118	9.89071e-05	0.0039134	No	meth_hyper_RNA_up	miraculin	GO:0004866	endopeptidase inhibitor activity	NP_001307321.1	AT1G17860.1
Solyc03g111300	SL3.0ch03	63398739	63400739	+	3496	8056	3981	7793	30.263	33.812	3.54863	1.13438e-08	7.19004	2.32153	8.32698e-05	0.00343925	No	meth_hyper_RNA_up	Cytochrome P450, putative	GO:0005506|GO:0016705|GO:0020037|GO:0055114	iron ion binding | oxidoreductase activity, acting on paired donors, with incorporation or reduction of molecular oxygen | heme binding | oxidation-reduction process	XP_004236332.1	AT3G48520.1
Solyc03g111640	SL3.0ch03	63759252	63761252	-	6877	7381	5313	5370	48.233	49.733	1.50065	0.0111907	1.70091	7.439	2.12577e-07	2.99349e-05	No	meth_hyper_RNA_up	Programmed cell death 4	GO:0005488	binding	XP_004236308.1	AT5G63190.1
Solyc03g113680	SL3.0ch03	65232834	65234834	-	1650	8085	2277	8866	16.949	20.434	3.4852	2.68912e-10	2.88212	3.28293	0.00116031	0.02642	No	meth_hyper_RNA_up	Microtubule-associated protein TORTIFOLIA1	GO:0005874	microtubule	XP_025885857.1	AT5G62580.1
Solyc03g114510	SL3.0ch03	65979149	65981149	-	11168	8947	12862	9560	55.521	57.363	1.84255	0.00011685	6.31079	-1.67662	0.0001972	0.00673306	Yes	meth_hyper_RNA_up	2-aminoethanethiol dioxygenase	GO:0016702|GO:0055114	oxidoreductase activity, acting on single donors with incorporation of molecular oxygen, incorporation of two atoms of oxygen | oxidation-reduction process	XP_004236092.1	AT1G18490.1
Solyc03g114960	SL3.0ch03	66293927	66295927	+	6559	13492	7725	13303	32.712	36.737	4.02515	4.88302e-17	1.9669	5.22951	4.51986e-05	0.00216421	No	meth_hyper_RNA_up	ABC transporter B family protein	GO:0005524|GO:0016887	ATP binding | ATPase activity	NP_001311224.1	AT1G18610.1
Solyc03g114965	SL3.0ch03	66301233	66303233	+	12584	12976	14276	13684	49.233	51.059	1.82548	2.48086e-05	2.61756	3.73659	1.35744e-08	2.92487e-06	Yes	meth_hyper_RNA_up	Galactose oxidase/kelch repeat superfamily protein	GO:0005515	protein binding	XP_004236063.1	0
Solyc03g115060	SL3.0ch03	66379842	66381842	-	3765	7835	5173	9481	32.457	35.301	2.84405	1.69176e-06	2.71749	1.96888	0.000414774	0.0121152	No	meth_hyper_RNA_up	Assimilatory nitrate reductase catalytic subunit	0	0	XP_010318855.1	AT2G03630.1
Solyc03g115450	SL3.0ch03	66638016	66640016	+	1959	5367	2137	5084	26.74	29.594	2.85386	0.000118423	5.51642	-0.992444	0.000495492	0.0139626	No	meth_hyper_RNA_up	LOW QUALITY:Zinc finger protein 1	GO:0046872	metal ion binding	XP_004236489.1	AT2G45120.1
Solyc03g115740	SL3.0ch03	66852709	66854709	-	154	1579	167	1249	8.886	11.794	2.90746	0.00488421	1.62656	7.04983	5.31594e-05	0.00245977	No	meth_hyper_RNA_up	Xyloglucan alpha-1,6-xylosyltransferase	GO:0016021|GO:0016757	integral component of membrane | transferase activity, transferring glycosyl groups	XP_010318819.1	AT5G07720.1
Solyc03g116225	SL3.0ch03	67200554	67202554	+	591	5897	652	5698	9.109	10.268	1.15859	0.0153663	2.46128	9.57061	1.3797e-06	0.000134101	Yes	meth_hyper_RNA_up	42kDa chitin-binding protein	GO:0008061	chitin binding	XP_010318807.1	0
Solyc03g116700	SL3.0ch03	67475034	67477034	+	768	1407	790	992	35.31	44.332	9.02187	1.39159e-08	7.2254	4.63924	3.28416e-07	4.25608e-05	No	meth_hyper_RNA_up	Blue copper protein	GO:0009055	electron transfer activity	XP_004235961.1	AT5G20230.1
Solyc03g117210	SL3.0ch03	67896486	67898486	-	1443	7585	2244	8706	15.984	20.493	4.50954	9.5211e-16	2.95616	4.7856	1.4039e-05	0.000858373	No	meth_hyper_RNA_up	abscisic acid responsive elements-binding factor 3	0	0	XP_004235918.1	AT1G80610.1
Solyc03g117260	SL3.0ch03	67919595	67921595	+	1333	7604	1206	5996	14.916	16.745	1.82983	0.00116462	4.87065	-0.125598	0.00195256	0.0395242	No	meth_hyper_RNA_up	transmembrane protein, putative (DUF247)	0	0	XP_019068675.1	AT3G02645.1
Solyc03g119210	SL3.0ch03	69353845	69355845	+	3009	8150	2969	6872	26.965	30.17	3.20492	4.11383e-07	3.81449	1.034	0.000261813	0.00849776	No	meth_hyper_RNA_up	Lipid transfer protein	GO:0006869	lipid transport	XP_004235834.1	AT3G18280.1
Solyc03g119590	SL3.0ch03	69637045	69639045	+	7827	6550	9418	7204	54.441	56.66	2.21873	7.98516e-05	5.47315	2.57567	0.00010254	0.00401962	No	meth_hyper_RNA_up	LOW QUALITY:NIMIN2c protein	0	0	XP_004235831.1	0
Solyc03g121340	SL3.0ch03	70946951	70948951	+	78	2301	59	1228	3.279	4.584	1.30562	0.0289468	5.73589	0.708089	6.64052e-05	0.00291056	Yes	meth_hyper_RNA_up	LOW QUALITY:isopentenyltransferase 5	0	0	XP_004239802.1	0
Solyc03g121360	SL3.0ch03	70956394	70958394	+	1921	6642	2349	7170	22.434	24.677	2.24324	0.000319805	1.4174	8.25004	0.000133771	0.0049893	No	meth_hyper_RNA_up	Charged multivesicular body 1	GO:0007034	vacuolar transport	XP_004235617.1	AT1G17730.1
Solyc03g121400	SL3.0ch03	70990994	70992994	-	937	10198	1225	10530	8.415	10.421	2.00619	2.99901e-07	1.33141	5.06992	0.00221274	0.0432767	No	meth_hyper_RNA_up	Dof zinc finger protein14	GO:0003677|GO:0006355	DNA binding | regulation of transcription, DNA-templated	XP_004235615.1	AT1G51700.1
Solyc03g121610	SL3.0ch03	71191215	71193215	-	904	6585	1479	7903	12.071	15.764	3.69319	1.66526e-11	1.3291	3.51492	0.00129912	0.0288003	No	meth_hyper_RNA_up	Protein kinase	GO:0005524	ATP binding	XP_004235597.1	AT5G56890.1
Solyc03g121850	SL3.0ch03	71367805	71369805	+	13611	7390	16742	8600	64.811	66.064	1.25304	0.00320327	1.14397	4.1318	0.000324792	0.0100234	Yes	meth_hyper_RNA_up	DNA gyrase subunit B	0	0	XP_004235580.1	AT1G05950.1
Solyc03g122340	SL3.0ch03	71700433	71702433	+	9601	6947	11363	7763	58.019	59.411	1.39218	0.00489614	4.21527	7.64187	1.16312e-07	1.80881e-05	No	meth_hyper_RNA_up	lipoxygenase D	GO:0016702|GO:0046872|GO:0055114	oxidoreductase activity, acting on single donors with incorporation of molecular oxygen, incorporation of two atoms of oxygen | metal ion binding | oxidation-reduction process	NP_001307221.1	AT1G17420.1
Solyc03g122350	SL3.0ch03	71709524	71711524	+	7175	10234	8361	10478	41.214	44.381	3.16702	2.14884e-09	2.35918	8.07548	0.000370469	0.0110701	No	meth_hyper_RNA_up	Cytochrome P450	GO:0016705|GO:0055114	oxidoreductase activity, acting on paired donors, with incorporation or reduction of molecular oxygen | oxidation-reduction process	XP_004235548.1	AT5G07990.1
Solyc03g123630	SL3.0ch03	71930817	71932817	-	241	5512	275	4700	4.189	5.528	1.33852	0.0009591	2.39813	8.52301	0.00202784	0.0406731	No	meth_hyper_RNA_up	pectin methylesterase	GO:0005618|GO:0030599|GO:0042545	cell wall | pectinesterase activity | cell wall modification	NP_001233857.2	AT3G14310.1
Solyc04g005160	SL3.0ch04	114095	116095	-	6545	6201	7123	5664	51.349	55.705	4.35557	7.59019e-12	1.36714	7.42467	0.000711453	0.0183074	Yes	meth_hyper_RNA_up	6-phosphogluconate dehydrogenase, decarboxylating	GO:0055114	oxidation-reduction process	XP_010319490.1	AT3G02360.2
Solyc04g005480	SL3.0ch04	323831	325831	-	669	3288	764	2642	16.907	22.431	5.52426	5.00529e-09	3.0466	7.53776	4.02914e-07	5.00397e-05	No	meth_hyper_RNA_up	LOW QUALITY:Nodulin-related protein 1, putative	0	0	XP_004237054.1	0
Solyc04g005670	SL3.0ch04	441972	443972	+	2272	9096	2636	8645	19.986	23.367	3.3808	1.36362e-09	1.5419	7.72927	0.000583062	0.0159077	Yes	meth_hyper_RNA_up	Kelch repeat-containing F-box family protein, putative	GO:0005515	protein binding	XP_004237034.1	AT1G14330.1
Solyc04g007320	SL3.0ch04	1033126	1035126	+	9760	7974	12802	9695	55.036	56.905	1.86984	0.000155215	4.58271	1.21249	5.57353e-05	0.00255846	Yes	meth_hyper_RNA_up	Disease resistance protein (TIR-NBS-LRR class), putative	GO:0043531	ADP binding	XP_004237202.1	AT5G17680.1
Solyc04g007580	SL3.0ch04	1260146	1262146	+	11204	7990	12959	8330	58.372	60.872	2.4994	4.21884e-07	3.85011	6.48017	2.39264e-07	3.25527e-05	No	meth_hyper_RNA_up	LOW QUALITY:DUF4228 domain protein	0	0	XP_004237025.1	AT3G03280.1
Solyc04g007620	SL3.0ch04	1299142	1301142	+	1710	10940	2192	12170	13.518	15.262	1.74471	4.63386e-05	2.82689	4.61557	1.8724e-07	2.69727e-05	No	meth_hyper_RNA_up	LOW QUALITY:mediator of RNA polymerase II transcription subunit	0	0	XP_019068905.1	AT2G01300.1
Solyc04g007690	SL3.0ch04	1377528	1379528	-	4454	8651	5485	9738	33.987	36.031	2.04398	0.000276483	7.84616	1.2617	1.73027e-06	0.000162307	No	meth_hyper_RNA_up	SlPIN3	GO:0016021|GO:0055085	integral component of membrane | transmembrane transport	XP_010319114.1	AT1G70940.1
Solyc04g007710	SL3.0ch04	1396547	1398547	-	4748	8369	5106	7997	36.197	38.968	2.77087	4.18531e-06	1.5187	4.24579	7.46629e-05	0.00317544	Yes	meth_hyper_RNA_up	mitogen-activated protein kinase 14	GO:0005524	ATP binding	XP_019068755.1	AT1G73670.1
Solyc04g008240	SL3.0ch04	1916134	1918134	+	6172	10048	7458	11093	38.052	40.203	2.1509	4.01434e-05	1.19811	6.11662	8.38225e-05	0.00345013	No	meth_hyper_RNA_up	Oxidoreductase, 2OG-Fe(II) oxygenase family protein	0	0	XP_004236917.1	AT1G14710.1
Solyc04g008500	SL3.0ch04	2121343	2123343	+	4489	6920	5644	7895	39.346	41.687	2.34085	0.0001574	1.47385	3.25557	0.000214394	0.00721586	No	meth_hyper_RNA_up	Zinc finger protein, putative	GO:0046872	metal ion binding	XP_004236896.1	AT2G02080.1
Solyc04g009180	SL3.0ch04	2684904	2686904	+	7438	8131	9447	9758	47.774	49.19	1.41589	0.00548678	1.45893	2.3658	0.00175409	0.0365406	Yes	meth_hyper_RNA_up	TCP transcription factor 14	0	0	NP_001293140.1	AT5G23280.1
Solyc04g009530	SL3.0ch04	2949217	2951217	-	6462	8000	7561	8782	44.683	46.264	1.58184	0.003616	1.99444	3.29698	4.07018e-05	0.00200526	Yes	meth_hyper_RNA_up	Glutathione S-transferase	GO:0005515	protein binding	XP_004236818.1	AT3G55040.1
Solyc04g009600	SL3.0ch04	2987480	2989480	+	7517	7450	8158	7461	50.224	52.231	2.00743	0.00036851	1.94991	2.16717	0.00016173	0.00580218	No	meth_hyper_RNA_up	TNF receptor-associated factor family protein	GO:0008270	zinc ion binding	XP_019068829.1	AT3G11950.1
Solyc04g011750	SL3.0ch04	4200801	4202801	+	1658	4681	2601	4738	26.156	35.441	9.28525	1.29462e-30	7.3648	-0.045506	0.000299392	0.00938134	Yes	meth_hyper_RNA_up	Protein TIC 214	0	0	XP_004236724.1	0
Solyc04g011767	SL3.0ch04	4218569	4220569	+	1679	6997	1628	5728	19.352	22.132	2.77936	1.54216e-05	4.03798	1.40588	0.000318894	0.00987551	No	meth_hyper_RNA_up	Pentatricopeptide repeat-containing protein At5g14770, mitochondrial	0	0	XP_004236723.1	0
Solyc04g012010	SL3.0ch04	4347338	4349338	+	1276	3144	1562	3453	28.869	31.147	2.27778	0.00955483	2.33405	1.48471	0.00028064	0.00894682	No	meth_hyper_RNA_up	Disease resistance protein (NBS-LRR class) family	GO:0043531	ADP binding	XP_025886396.1	AT3G46730.1
Solyc04g014680	SL3.0ch04	4943199	4945199	-	1749	943	2208	1041	64.97	67.959	2.98909	0.00960758	1.28647	5.66482	0.000492628	0.0139028	No	meth_hyper_RNA_up	Ubiquitin-specific protease family C19-related protein	0	0	XP_004236674.1	AT4G22290.1
Solyc04g015070	SL3.0ch04	5260314	5262314	+	2856	5500	3823	6881	34.179	35.716	1.53659	0.0155691	1.17971	3.43277	0.0024933	0.0472103	No	meth_hyper_RNA_up	Calcium-dependent lipid-binding (CaLB domain) family protein	GO:0005515	protein binding	XP_004236652.1	AT5G47710.1
Solyc04g016220	SL3.0ch04	6985151	6987151	+	8814	5806	12039	6604	60.287	64.577	4.28924	3.87065e-15	1.46527	5.9486	0.000279447	0.00893956	Yes	meth_hyper_RNA_up	Glycosyltransferase	GO:0008152|GO:0016758	metabolic process | transferase activity, transferring hexosyl groups	XP_004236593.1	AT2G15490.1
Solyc04g028460	SL3.0ch04	15728321	15730321	-	3466	9956	4070	9915	25.823	29.103	3.27933	2.27871e-09	6.5995	-1.28149	0.00224336	0.0436327	No	meth_hyper_RNA_up	LOW QUALITY:RNA-binding (RRM/RBD/RNP motifs) family protein	0	0	XP_010319613.1	AT1G70420.1
Solyc04g025650	SL3.0ch04	21288587	21290587	+	9845	10016	12059	11602	49.57	50.966	1.39622	0.00254406	5.4833	3.41926	1.47734e-13	1.35491e-10	No	meth_hyper_RNA_up	FAD/NAD(P)-binding oxidoreductase family protein	GO:0071949	FAD binding	XP_004237255.1	AT4G15760.1
Solyc04g025530	SL3.0ch04	22278471	22280471	+	4061	4905	5337	6135	45.293	46.522	1.22864	0.0413971	9.24375	3.40363	1.41775e-07	2.13068e-05	No	meth_hyper_RNA_up	glutamate decarboxylase	GO:0016831|GO:0019752|GO:0030170	carboxy-lyase activity | carboxylic acid metabolic process | pyridoxal phosphate binding	XP_004237250.1	AT2G02010.1
Solyc04g050140	SL3.0ch04	45587734	45589734	+	4393	6254	5096	6297	41.26	44.729	3.46877	2.92276e-07	2.29404	3.14506	4.80268e-06	0.00036241	No	meth_hyper_RNA_up	vacuolar sorting-associated protein (DUF946)	0	0	XP_004237516.1	AT3G04350.1
Solyc04g051510	SL3.0ch04	50657798	50659798	+	4200	6298	5276	7507	40.008	41.274	1.26595	0.0274684	1.6415	5.67165	0.000832086	0.0204876	No	meth_hyper_RNA_up	curl-3	GO:0005524	ATP binding	NP_001296180.1	AT4G39400.1
Solyc04g051690	SL3.0ch04	50950721	50952721	+	955	9180	1102	8147	9.423	11.915	2.49201	3.20846e-08	2.56449	3.02388	0.00215686	0.0425023	No	meth_hyper_RNA_up	WRKY transcription factor 51	GO:0003700|GO:0006355|GO:0043565	DNA-binding transcription factor activity | regulation of transcription, DNA-templated | sequence-specific DNA binding	XP_004237467.1	AT5G64810.1
Solyc04g051820	SL3.0ch04	51066357	51068357	+	1645	8370	2766	11451	16.425	19.456	3.03022	2.86727e-09	2.48018	6.88386	2.42393e-08	4.81662e-06	No	meth_hyper_RNA_up	RPM1-interacting protein 4 (RIN4) family protein	0	0	XP_004237461.1	AT5G09960.1
Solyc04g054480	SL3.0ch04	52521927	52523927	+	6399	7105	7914	8378	47.386	48.576	1.19003	0.0224992	1.04214	7.81296	0.00139415	0.0305552	No	meth_hyper_RNA_up	U-box domain-containing protein	GO:0005515	protein binding	XP_025886526.1	AT2G22125.1
Solyc04g054660	SL3.0ch04	52910318	52912318	-	1541	1905	1804	2009	44.719	47.312	2.59331	0.0159464	2.66018	0.994113	0.00143851	0.0311646	No	meth_hyper_RNA_up	LOW QUALITY:Ascorbate oxidase	GO:0005507|GO:0016491|GO:0055114	copper ion binding | oxidoreductase activity | oxidation-reduction process	XP_004237606.2	AT4G39830.1
Solyc04g054690	SL3.0ch04	52993750	52995750	-	827	6097	1145	7460	11.944	13.306	1.36225	0.00713872	3.81029	6.109	9.04471e-07	9.51504e-05	No	meth_hyper_RNA_up	ascorbate oxidase	GO:0055114	oxidation-reduction process	NP_001234829.2	AT4G39830.1
Solyc04g054740	SL3.0ch04	53119776	53121776	+	5448	6558	6682	7248	45.377	47.968	2.5911	2.99708e-05	1.72507	3.29335	0.000796206	0.0198044	No	meth_hyper_RNA_up	myo-inositol-1-phosphate synthase	GO:0004512|GO:0006021|GO:0008654	inositol-3-phosphate synthase activity | inositol biosynthetic process | phospholipid biosynthetic process	NP_001333892.1	AT5G10170.1
Solyc04g054950	SL3.0ch04	53424590	53426590	-	8453	5823	9479	5357	59.211	63.892	4.68062	9.5656e-16	7.4051	2.52033	5.756e-05	0.00262603	No	meth_hyper_RNA_up	NAD(P)-binding Rossmann-fold superfamily protein	GO:0016491	oxidoreductase activity	XP_004237405.1	AT5G06060.1
Solyc04g054980	SL3.0ch04	53455373	53457373	+	6112	5760	9127	6584	51.482	58.093	6.61058	8.77436e-27	1.87169	8.38638	1.31527e-08	2.85118e-06	No	meth_hyper_RNA_up	PLAT domain-containing protein 1	GO:0005515	protein binding	XP_004237403.1	AT4G39730.1
Solyc04g055207	SL3.0ch04	53818388	53820388	-	811	2890	665	1592	21.913	29.464	7.55089	1.68525e-10	3.66862	1.62312	0.000147803	0.0054061	No	meth_hyper_RNA_up	Transducin family protein / WD-40 repeat family protein	0	0	XP_010313572.1	0
Solyc04g056380	SL3.0ch04	54098472	54100472	+	12082	9727	16145	11326	55.399	58.771	3.37192	1.82109e-13	2.89808	2.7421	0.000182237	0.00635135	Yes	meth_hyper_RNA_up	Seipin	GO:0019915	lipid storage	XP_004237589.2	AT5G16460.1
Solyc04g083140	SL3.0ch04	54590890	54592890	+	1562	6041	2250	7958	20.545	22.042	1.49701	0.00968215	8.2599	4.44412	0.000196978	0.00673306	No	meth_hyper_RNA_up	Cytochrome P450	GO:0016705|GO:0055114	oxidoreductase activity, acting on paired donors, with incorporation or reduction of molecular oxygen | oxidation-reduction process	XP_004237369.1	AT3G26310.1
Solyc04g063230	SL3.0ch04	55388491	55390491	-	6378	6564	8009	7384	49.281	52.03	2.74873	4.66788e-06	1.15109	7.26951	0.00187119	0.0384427	No	meth_hyper_RNA_up	S-adenosyl-L-methionine-dependent methyltransferases superfamily protein	GO:0008168	methyltransferase activity	XP_004237701.1	AT5G64030.1
Solyc04g071480	SL3.0ch04	58552628	58554628	+	2359	11617	2995	11750	16.879	20.312	3.43303	2.5565e-13	2.1667	8.759	6.65333e-05	0.00291056	Yes	meth_hyper_RNA_up	LOW QUALITY:Plant/F1M20-13 protein	0	0	XP_004237794.1	AT1G18740.1
Solyc04g071900	SL3.0ch04	59003633	59005633	+	3387	7283	4229	7881	31.743	34.922	3.17835	5.30647e-07	3.89454	2.37633	0.000275947	0.00886794	No	meth_hyper_RNA_up	Peroxidase	GO:0004601|GO:0055114	peroxidase activity | oxidation-reduction process	NP_001334412.1	AT1G71695.1
Solyc04g072070	SL3.0ch04	59217429	59219429	-	8325	6324	10282	7395	56.83	58.166	1.33616	0.00927084	7.75811	1.18556	3.64892e-06	0.000290679	No	meth_hyper_RNA_up	WRKY transcription factor 55	GO:0003700|GO:0006355|GO:0043565	DNA-binding transcription factor activity | regulation of transcription, DNA-templated | sequence-specific DNA binding	XP_004237841.1	AT5G64810.1
Solyc04g074410	SL3.0ch04	60505540	60507540	+	217	1991	459	3153	9.828	12.708	2.87974	0.000652598	2.5704	8.67487	5.57328e-06	0.000405998	No	meth_hyper_RNA_up	Phosphate-responsive 1 family protein	0	0	XP_010320182.1	AT4G08950.1
Solyc04g074440	SL3.0ch04	60521233	60523233	-	4142	4280	5488	4443	49.181	55.261	6.08059	8.10644e-16	1.69185	7.77155	0.00064282	0.0170693	No	meth_hyper_RNA_up	Phosphate-responsive 1 family protein	0	0	XP_004237932.1	AT4G08950.1
Solyc04g074450	SL3.0ch04	60524782	60526782	-	4588	7354	5268	7502	38.419	41.253	2.83391	6.28922e-06	2.38468	9.21013	1.59423e-05	0.000961595	No	meth_hyper_RNA_up	Phosphate-responsive 1 family protein	0	0	XP_010320183.1	AT4G08950.1
Solyc04g074470	SL3.0ch04	60537580	60539580	+	2352	3912	3831	4269	37.548	47.296	9.7484	1.30842e-30	7.45754	1.62248	9.20243e-06	0.000619873	No	meth_hyper_RNA_up	Phosphate-induced protein 1	0	0	XP_004237934.1	AT5G64260.1
Solyc04g074710	SL3.0ch04	60724548	60726548	-	4284	6091	5373	6144	41.292	46.653	5.36121	5.43328e-15	5.71833	-0.0719823	0.00125551	0.028102	No	meth_hyper_RNA_up	Queuine tRNA-ribosyltransferase catalytic subunit 1	GO:0008033|GO:0008479	tRNA processing | queuine tRNA-ribosyltransferase activity	XP_004237947.1	0
Solyc04g077120	SL3.0ch04	62154254	62156254	+	892	2766	1367	3590	24.385	27.577	3.19225	0.000679063	1.6047	4.38141	0.0003417	0.0104283	No	meth_hyper_RNA_up	Inositol-tetrakisphosphate 1-kinase	GO:0000287|GO:0005524|GO:0005622|GO:0032957|GO:0047325|GO:0052725|GO:0052726	magnesium ion binding | ATP binding | intracellular | inositol trisphosphate metabolic process | inositol tetrakisphosphate 1-kinase activity | inositol-1,3,4-trisphosphate 6-kinase activity | inositol-1,3,4-trisphosphate 5-kinase activity	XP_004238049.1	AT4G08170.2
Solyc04g077140	SL3.0ch04	62165128	62167128	+	618	4576	678	4447	11.898	13.229	1.33092	0.0233934	3.37659	2.4365	0.00108051	0.0250146	No	meth_hyper_RNA_up	DUF1005 family protein	0	0	XP_004238051.1	AT1G10020.1
Solyc04g077160	SL3.0ch04	62175883	62177883	-	2133	6415	2160	6035	24.953	26.358	1.40433	0.0209419	1.87935	2.79561	0.000150174	0.00544289	No	meth_hyper_RNA_up	myb-like protein X	0	0	XP_010320271.1	0
Solyc04g077230	SL3.0ch04	62257791	62259791	+	386	3619	598	4425	9.638	11.905	2.26728	0.000463507	3.23831	4.36304	0.000464665	0.0132749	No	meth_hyper_RNA_up	Indole-3-acetaldehyde oxidase	0	0	XP_010324198.1	0
Solyc04g077870	SL3.0ch04	62839016	62841016	+	11992	10650	13457	11309	52.964	54.337	1.37307	0.00194618	1.96925	3.81068	2.46319e-06	0.000212297	Yes	meth_hyper_RNA_up	Calcium-transporting ATPase	GO:0016021	integral component of membrane	XP_010320298.1	AT1G27770.1
Solyc04g077980	SL3.0ch04	62933908	62935908	+	3012	8032	3417	8300	27.273	29.163	1.89003	0.00116944	1.4656	8.61156	0.00243531	0.0463824	No	meth_hyper_RNA_up	C2H2-type zinc finger protein	GO:0046872	metal ion binding	NP_001234718.1	AT1G27730.1
Solyc04g078310	SL3.0ch04	63151153	63153153	+	3363	8154	4256	8655	29.2	32.964	3.76383	4.77244e-10	6.42543	-0.229399	9.56902e-05	0.00380717	No	meth_hyper_RNA_up	cyclin A3_1	GO:0005634	nucleus	XP_004238117.1	AT1G47230.2
Solyc04g078750	SL3.0ch04	63498271	63500271	+	5609	8934	6461	9288	38.568	41.025	2.45644	1.36479e-05	2.18578	7.5313	3.23283e-05	0.00165899	No	meth_hyper_RNA_up	Late embryogenesis abundant protein	0	0	XP_004238140.1	AT1G45688.1
Solyc04g078870	SL3.0ch04	63612975	63614975	+	1668	5768	2001	6171	22.431	24.486	2.05464	0.0017436	0.84121	5.16334	0.00195878	0.0395605	No	meth_hyper_RNA_up	Protein kinase family protein	GO:0005524	ATP binding	XP_004238153.1	AT5G09890.2
Solyc04g079120	SL3.0ch04	63796642	63798642	-	3776	11261	4224	10865	25.111	27.994	2.88251	2.38379e-08	2.44408	5.64668	0.000110385	0.00424999	No	meth_hyper_RNA_up	Protein phosphatase 2C family protein	GO:0004722|GO:0006470	protein serine/threonine phosphatase activity | protein dephosphorylation	XP_004238165.1	AT1G47380.1
Solyc04g079400	SL3.0ch04	64001331	64003331	-	6352	11772	6587	11408	35.047	36.605	1.55716	0.00145008	2.94429	3.81504	0.000482246	0.013668	No	meth_hyper_RNA_up	MAP kinase kinase kinase 35	GO:0005524	ATP binding	XP_004238187.1	AT5G66850.1
Solyc04g079730	SL3.0ch04	64181436	64183436	-	4725	9272	5382	9977	33.757	35.041	1.28411	0.012045	3.73761	4.05344	0.000421962	0.0122527	No	meth_hyper_RNA_up	allene oxide synthase	GO:0005506|GO:0016705|GO:0020037|GO:0055114	iron ion binding | oxidoreductase activity, acting on paired donors, with incorporation or reduction of molecular oxygen | heme binding | oxidation-reduction process	NP_001234833.2	AT5G42650.1
Solyc04g079820	SL3.0ch04	64213268	64215268	+	10139	8666	10819	8826	53.917	55.073	1.15603	0.0131865	8.86846	-0.448027	0.00266122	0.0497318	No	meth_hyper_RNA_up	Inositol polyphosphate 5-phosphatase I	GO:0046856	phosphatidylinositol dephosphorylation	XP_004238215.1	AT1G47510.1
Solyc04g080460	SL3.0ch04	64722032	64724032	-	11097	8197	13438	9499	57.515	58.587	1.07127	0.0150648	1.3577	5.09219	1.92948e-06	0.000176056	No	meth_hyper_RNA_up	Sugar facilitator protein 4	GO:0016021|GO:0022857|GO:0055085	integral component of membrane | transmembrane transporter activity | transmembrane transport	NP_001289834.1	AT1G75220.1
Solyc04g080820	SL3.0ch04	64983382	64985382	-	4116	5715	4767	5748	41.868	45.335	3.46767	8.15494e-07	9.35667	-0.58933	0.00185567	0.0381897	No	meth_hyper_RNA_up	cytokinin oxidase4	GO:0050660	flavin adenine dinucleotide binding	NP_001266251.1	AT1G75450.1
Solyc04g080850	SL3.0ch04	65008992	65010992	-	7278	7641	8274	7485	48.783	52.503	3.7199	1.59425e-10	1.23802	7.9703	5.83852e-05	0.00264178	No	meth_hyper_RNA_up	Thioredoxin	GO:0045454	cell redox homeostasis	XP_004238306.1	AT3G51030.1
Solyc04g081400	SL3.0ch04	65476669	65478669	+	9012	9327	11130	10723	49.141	50.931	1.79005	0.00029475	1.44893	4.91494	1.67672e-05	0.000992932	Yes	meth_hyper_RNA_up	Phosphotransferase	GO:0005524|GO:0005975|GO:0016773	ATP binding | carbohydrate metabolic process | phosphotransferase activity, alcohol group as acceptor	NP_001234717.1	AT1G47840.1
Solyc04g081870	SL3.0ch04	65824366	65826366	-	3167	9735	3266	9495	24.547	25.594	1.04702	0.0282702	5.81353	0.811304	0.000593571	0.0160612	No	meth_hyper_RNA_up	Expansin A11	GO:0009664	plant-type cell wall organization	NP_001234017.2	AT1G20190.1
Solyc04g081960	SL3.0ch04	65883331	65885331	-	691	5458	1186	5633	11.238	17.393	6.15498	1.05392e-22	2.59264	2.16276	0.0019558	0.0395449	No	meth_hyper_RNA_up	LOW QUALITY:Syringolide-induced protein 14-1-1	0	0	XP_004238391.1	AT1G76070.1
Solyc05g005160	SL3.0ch05	145033	147033	-	3762	7654	4267	7435	32.954	36.464	3.5101	3.42279e-08	2.86116	6.68107	4.41544e-13	3.67282e-10	No	meth_hyper_RNA_up	ATP-citrate synthase, putative	GO:0005524	ATP binding	XP_004238647.1	AT1G60810.1
Solyc05g006050	SL3.0ch05	789498	791498	-	7406	10148	7982	10029	42.19	44.317	2.12755	4.87901e-05	2.21263	2.86965	0.00168988	0.0355552	No	meth_hyper_RNA_up	cyclinD1_1	GO:0005634	nucleus	XP_004238706.1	AT1G70210.1
Solyc05g007930	SL3.0ch05	2358388	2360388	-	762	10590	1046	12876	6.712	7.513	0.800815	0.00849834	3.16761	2.82661	0.000178941	0.00626872	No	meth_hyper_RNA_up	Beta-1,3-galactosyltransferase-like protein	GO:0030246	carbohydrate binding	XP_010320699.1	AT1G26810.1
Solyc05g008540	SL3.0ch05	2863162	2865162	+	6912	6146	7073	5753	52.933	55.146	2.21273	0.000292875	1.57602	2.58039	0.00252066	0.0475774	Yes	meth_hyper_RNA_up	Origin recognition complex subunit 4	GO:0005524	ATP binding	XP_004238875.1	AT2G01120.2
Solyc05g008815	SL3.0ch05	3049357	3051357	-	1766	9100	2379	10428	16.253	18.576	2.32325	3.23579e-06	2.6175	5.97772	7.08224e-08	1.20056e-05	Yes	meth_hyper_RNA_up	Lipid phosphate phosphatase-like protein	0	0	XP_010320736.1	0
Solyc05g009330	SL3.0ch05	3482510	3484510	-	6098	7118	7075	7633	46.141	48.103	1.96203	0.000783977	2.37667	4.29085	3.35991e-05	0.00170097	Yes	meth_hyper_RNA_up	Fiber protein Fb34	0	0	XP_004238928.1	AT1G13380.1
Solyc05g009520	SL3.0ch05	3720391	3722391	-	4889	8505	4756	7635	36.501	38.383	1.88128	0.00130788	1.61058	5.56445	0.000164186	0.00587504	No	meth_hyper_RNA_up	LOW QUALITY:BnaA06g07410D protein	0	0	XP_004238939.1	AT1G13360.1
Solyc05g009790	SL3.0ch05	3988403	3990403	-	738	5984	884	6460	10.979	12.037	1.05816	0.0268448	2.53251	7.03381	2.41441e-06	0.000209101	No	meth_hyper_RNA_up	AP2/B3 transcription factor family protein	GO:0003700|GO:0006355	DNA-binding transcription factor activity | regulation of transcription, DNA-templated	NP_001307390.1	AT1G13260.1
Solyc05g009890	SL3.0ch05	4113841	4115841	-	2267	8409	2462	8605	21.235	22.246	1.01177	0.0373822	7.8912	0.740123	0.000426436	0.0123604	No	meth_hyper_RNA_up	LOW QUALITY:Eukaryotic aspartyl protease family protein	GO:0004190|GO:0006508	aspartic-type endopeptidase activity | proteolysis	XP_004238970.1	AT3G25700.1
Solyc05g012670	SL3.0ch05	5873618	5875618	+	4667	11196	5985	11888	29.421	33.486	4.0656	3.95348e-15	5.25547	0.408817	7.75065e-05	0.00325764	Yes	meth_hyper_RNA_up	Glycosyltransferase	GO:0008152|GO:0016758	metabolic process | transferase activity, transferring hexosyl groups	XP_004239467.1	AT2G36770.1
Solyc05g012805	SL3.0ch05	5973625	5975625	-	26	874	112	1559	2.889	6.703	3.81368	2.97724e-05	2.73535	4.91545	1.39121e-10	6.63479e-08	No	meth_hyper_RNA_up	transmembrane protein	0	0	XP_004239095.1	0
Solyc05g015980	SL3.0ch05	13146310	13148310	-	3018	9066	4660	11900	24.975	28.14	3.16492	3.92059e-09	1.32732	3.50981	0.00202865	0.0406731	No	meth_hyper_RNA_up	Gap junction beta-4 protein isoform 1	0	0	XP_004239246.1	AT5G13100.1
Solyc05g016060	SL3.0ch05	14391946	14393946	-	4608	6779	4601	6309	40.467	42.172	1.70512	0.00605107	2.37435	7.11871	0.000100829	0.00396749	No	meth_hyper_RNA_up	cysteine-rich/transmembrane domain A-like protein	0	0	XP_004239248.1	0
Solyc05g024410	SL3.0ch05	31639388	31641388	+	6256	5824	6661	5538	51.788	54.603	2.81476	1.20927e-05	8.3143	0.402149	7.13519e-10	2.52685e-07	No	meth_hyper_RNA_up	Na+//0A7//9AL///QC9//0Aw//9AK///QDv//0Av//9AL3//QDC//0Asf/9AO///QC///0Avf/9AML//QC///0A7//9AL///QC9//0Aw//9AK///QDv//0Av//9AL3//QDC//0Av//9AO///QC///0Avf/9AML//QC9 exchanger 8	0	0	XP_004239652.3	AT3G07720.1
Solyc05g041920	SL3.0ch05	55093435	55095435	-	3284	8277	3627	8291	28.406	30.433	2.02711	0.000531315	8.10264	-1.66984	0.0025098	0.0474474	No	meth_hyper_RNA_up	Ribonuclease 3 family protein	GO:0004525|GO:0006396	ribonuclease III activity | RNA processing	XP_004240163.1	AT4G15417.1
Solyc05g050380	SL3.0ch05	61335579	61337579	+	9246	6519	10778	6654	58.649	61.829	3.17991	6.01699e-09	3.01015	4.9202	0.000782144	0.0195634	No	meth_hyper_RNA_up	Cyclic nucleotide-gated channel	GO:0005216|GO:0006811|GO:0016020|GO:0055085	ion channel activity | ion transport | membrane | transmembrane transport	XP_004240079.1	AT4G01010.1
Solyc05g051460	SL3.0ch05	62659740	62661740	+	5206	8960	4999	7521	36.75	39.928	3.17815	1.42816e-07	2.42934	3.31828	7.96786e-05	0.00332552	No	meth_hyper_RNA_up	Homeobox associated leucine zipper protein	GO:0006355|GO:0043565	regulation of transcription, DNA-templated | sequence-specific DNA binding	XP_004240025.1	AT2G22430.1
Solyc05g052780	SL3.0ch05	63811300	63813300	+	3607	7158	5784	7254	33.507	44.363	10.8559	5.91712e-64	1.12332	6.47529	0.000211027	0.00712499	Yes	meth_hyper_RNA_up	Pollen-specific protein SF3, putative	GO:0008270	zinc ion binding	XP_004239928.1	AT2G39900.1
Solyc05g053310	SL3.0ch05	64282829	64284829	-	9354	7923	12000	9807	54.141	55.028	0.886858	0.0414354	2.14886	5.45516	1.26778e-05	0.000788646	No	meth_hyper_RNA_up	Stress responsive A/B barrel domain protein	0	0	XP_004239884.1	AT3G17210.1
Solyc05g053760	SL3.0ch05	64634866	64636866	+	8353	9103	9733	9495	47.852	50.619	2.76715	1.71541e-07	1.31583	4.46577	0.00125024	0.0280366	No	meth_hyper_RNA_up	Chaperone protein DNAj, putative	0	0	XP_004239854.1	AT4G13830.2
Solyc05g054320	SL3.0ch05	65107418	65109418	-	3972	3181	4556	2899	55.529	61.113	5.5842	1.96683e-11	1.73589	3.71459	0.000891445	0.0215878	Yes	meth_hyper_RNA_up	Epoxide hydrolase	GO:0003824	catalytic activity	XP_004239805.1	AT4G02340.1
Solyc05g054610	SL3.0ch05	65332914	65334914	+	7143	6275	8398	6102	53.234	57.917	4.68278	1.30169e-14	3.31922	2.96506	0.00128299	0.0285384	Yes	meth_hyper_RNA_up	histone H4	GO:0046982	protein heterodimerization activity	XP_004251292.1	AT5G59970.1
Solyc05g054680	SL3.0ch05	65392607	65394607	-	3752	5354	4771	5325	41.204	47.256	6.05274	1.54194e-16	2.16456	2.04109	0.000863818	0.0210331	Yes	meth_hyper_RNA_up	protein kinase family protein	GO:0005524	ATP binding	XP_004240198.2	AT5G54380.1
Solyc05g054800	SL3.0ch05	65475019	65477019	-	4599	9325	4949	7670	33.029	39.219	6.18934	9.08089e-25	1.63957	8.06373	1.62496e-05	0.000972487	No	meth_hyper_RNA_up	LEM3 (Ligand-effect modulator 3) family protein	GO:0016020	membrane	XP_004239766.1	AT3G12740.1
Solyc05g056020	SL3.0ch05	66250575	66252575	+	573	8002	703	8510	6.682	7.631	0.948306	0.00873853	1.44709	4.65307	0.000422034	0.0122527	No	meth_hyper_RNA_up	V-type proton ATPase subunit G	GO:0015992|GO:0016471|GO:0016820	vacuolar proton-transporting V-type ATPase complex	XP_004239677.1	AT4G23710.1
Solyc05g056080	SL3.0ch05	66313406	66315406	-	4691	11068	5712	11463	29.767	33.258	3.49052	2.48904e-11	3.91162	0.984257	0.00118566	0.0268921	No	meth_hyper_RNA_up	zinc finger B-box protein	0	0	XP_004239672.1	AT4G25030.1
Solyc05g056120	SL3.0ch05	66362822	66364822	-	198	9189	266	10378	2.109	2.499	0.38976	0.0376093	1.81238	6.78472	0.000495763	0.0139626	No	meth_hyper_RNA_up	GATA transcription factor	GO:0006355|GO:0008270	regulation of transcription, DNA-templated | zinc ion binding	XP_004239665.1	AT3G54810.2
Solyc06g005170	SL3.0ch06	189875	191875	+	9648	7565	10095	7487	56.051	57.417	1.36602	0.00637746	3.64581	8.27964	6.85394e-08	1.16739e-05	No	meth_hyper_RNA_up	mitogen-activated protein kinase 3	GO:0005524	ATP binding	NP_001234360.1	AT3G45640.1
Solyc06g006000	SL3.0ch06	1010286	1012286	-	7933	6743	9550	7021	54.054	57.631	3.57656	4.45681e-10	2.83119	5.14281	1.98086e-05	0.00113227	No	meth_hyper_RNA_up	Maternal effect embryo arrest 59	0	0	XP_004240397.1	AT4G37300.1
Solyc06g007440	SL3.0ch06	1454294	1456294	-	872	9792	1081	10305	8.177	9.494	1.31707	0.000456195	3.10976	1.64871	2.63606e-05	0.00142802	No	meth_hyper_RNA_up	Non-specific serine/threonine protein kinase	GO:0007165	signal transduction	XP_004240424.1	AT2G30360.1
Solyc06g007610	SL3.0ch06	1605238	1607238	-	5770	8998	7468	10384	39.071	41.833	2.76188	5.71764e-07	3.15594	0.158225	0.00226867	0.0439577	Yes	meth_hyper_RNA_up	Lactoylglutathione lyase / glyoxalase I family protein	0	0	XP_004240438.1	AT5G48480.1
Solyc06g008100	SL3.0ch06	1986358	1988358	-	7587	11630	9389	13518	39.481	40.987	1.5068	0.00125088	7.2988	-1.28597	0.000863833	0.0210331	No	meth_hyper_RNA_up	Unknown	0	0	0	AT3G04300.1
Solyc06g008300	SL3.0ch06	2171230	2173230	-	379	3501	509	3692	9.768	12.116	2.34812	0.000619852	3.42924	6.88758	9.6614e-05	0.00383539	No	meth_hyper_RNA_up	Leucine-rich repeat receptor-like protein kinase family protein	GO:0005515	protein binding	XP_010321824.1	AT2G15080.1
Solyc06g008390	SL3.0ch06	2320686	2322686	-	4319	5569	4177	5049	43.679	45.274	1.59502	0.0151865	4.05201	0.734191	8.17145e-05	0.00339068	No	meth_hyper_RNA_up	NBS-LRR resistance protein-like protein	0	0	XP_019069678.1	0
Solyc06g009270	SL3.0ch06	3235341	3237341	-	13155	7522	17099	7563	63.621	69.333	5.71197	1.58306e-36	1.62462	4.91146	0.00200812	0.040352	No	meth_hyper_RNA_up	Diacylglycerol kinase	GO:0016301	kinase activity	XP_004240557.1	AT4G30340.1
Solyc06g009640	SL3.0ch06	3586420	3588420	-	2538	5282	3579	6275	32.455	36.32	3.86503	1.17011e-07	1.31037	5.92346	0.000466642	0.0133101	No	meth_hyper_RNA_up	BZIP transcription factor	GO:0003700|GO:0006355|GO:0043565	DNA-binding transcription factor activity | regulation of transcription, DNA-templated | sequence-specific DNA binding	XP_004240572.1	AT3G62420.1
Solyc06g019200	SL3.0ch06	18186872	18188872	-	9509	6537	11460	6680	59.261	63.175	3.91443	3.65583e-13	1.62324	4.01223	0.00117609	0.0266919	Yes	meth_hyper_RNA_up	Ethylene-dependent gravitropism-deficient and yellow-green-like 2 isoform 2	0	0	XP_010321954.1	AT5G05740.1
Solyc06g030470	SL3.0ch06	18833893	18835893	-	9591	3747	13033	4206	71.907	75.602	3.6945	9.09903e-13	3.10275	7.05275	8.25016e-07	8.83508e-05	No	meth_hyper_RNA_up	Domain of Uncharacterized protein function, putative	0	0	XP_004240776.1	AT2G28150.1
Solyc06g035700	SL3.0ch06	24830206	24832206	-	1821	8057	1824	6095	18.435	23.033	4.59831	1.48589e-13	5.90425	4.44261	1.4623e-09	4.58803e-07	No	meth_hyper_RNA_up	Dehydration responsive element binding transcription factor	GO:0003700|GO:0006355	DNA-binding transcription factor activity | regulation of transcription, DNA-templated	XP_004240742.1	AT5G52020.1
Solyc06g036310	SL3.0ch06	25950960	25952960	+	7246	11395	8742	12634	38.871	40.896	2.02503	3.6007e-05	3.16629	5.87916	9.56397e-13	6.98131e-10	No	meth_hyper_RNA_up	Heavy metal transport/detoxification superfamily protein	GO:0030001|GO:0046872	metal ion transport | metal ion binding	XP_004240715.1	0
Solyc06g048950	SL3.0ch06	32113007	32115007	+	8712	7336	10807	8067	54.287	57.259	2.97152	3.95869e-08	1.78728	2.89927	0.000694218	0.0180456	Yes	meth_hyper_RNA_up	Leucine-rich receptor-like kinase family protein	GO:0005524	ATP binding	XP_004240861.1	AT3G56370.1
Solyc06g049020	SL3.0ch06	32353333	32355333	-	7043	8214	8232	8549	46.162	49.055	2.89306	3.11542e-07	1.73515	7.21098	0.000197843	0.00673306	No	meth_hyper_RNA_up	Sorghum bicolor protein targeted either to mitochondria or chloroplast proteins T50848	0	0	XP_004240863.1	AT3G56360.1
Solyc06g049070	SL3.0ch06	32429533	32431533	+	4912	8066	6131	8979	37.849	40.576	2.72711	3.70209e-06	0.972394	5.8723	0.000749385	0.0189027	No	meth_hyper_RNA_up	Nucleotide/sugar transporter family protein	0	0	XP_004240867.1	AT1G06890.1
Solyc06g050140	SL3.0ch06	32588208	32590208	-	3790	7325	3843	6895	34.098	35.789	1.69072	0.00563968	5.04882	1.37932	0.000195562	0.00671292	No	meth_hyper_RNA_up	LOW QUALITY:Plant regulator RWP-RK family protein	0	0	XP_004241769.1	0
Solyc06g051020	SL3.0ch06	34191048	34193048	+	6301	10156	7934	10895	38.288	42.137	3.84947	5.556e-13	1.20549	5.87887	0.000306528	0.00955875	No	meth_hyper_RNA_up	LOW QUALITY:Peptide-N4-(N-acetyl-beta-glucosaminyl)asparagine amidase A protein	0	0	XP_004240910.1	AT5G05480.1
Solyc06g051030	SL3.0ch06	34212824	34214824	+	9604	9129	12994	11763	51.268	52.486	1.21835	0.00735192	1.98927	5.67945	1.6152e-05	0.000969337	Yes	meth_hyper_RNA_up	Protein kinase family protein, putative, expressed	GO:0004672|GO:0006468	protein kinase activity | protein phosphorylation	XP_004240911.1	AT2G40270.1
Solyc06g051410	SL3.0ch06	34850581	34852581	-	698	2679	198	535	20.669	27.012	6.34305	0.000179331	1.97187	3.90033	7.48835e-05	0.00318104	No	meth_hyper_RNA_up	Phosphoribosylanthranilate isomerase	GO:0004640|GO:0006568	phosphoribosylanthranilate isomerase activity | tryptophan metabolic process	XP_010322189.1	AT1G07780.3
Solyc06g052070	SL3.0ch06	35816722	35818722	-	591	10059	739	9551	5.549	7.182	1.63243	1.71285e-06	1.55654	4.73103	0.000725959	0.0185472	No	meth_hyper_RNA_up	WD-repeat protein, putative	GO:0005515	protein binding	XP_004240961.1	AT5G53500.1
Solyc06g053300	SL3.0ch06	36121175	36123175	-	3930	7502	4642	8101	34.377	36.428	2.05066	0.000668542	1.00305	5.56956	0.000176061	0.00619754	Yes	meth_hyper_RNA_up	RNA-binding protein, putative	GO:0003676	nucleic acid binding	XP_004240980.1	AT4G10610.1
Solyc06g060080	SL3.0ch06	38104828	38106828	+	623	2278	1048	2611	21.475	28.642	7.16635	7.67802e-11	1.22286	6.32388	0.00182489	0.0377224	No	meth_hyper_RNA_up	Mitochondrial ATP synthase 6 kDa subunit	0	0	XP_010322939.1	AT5G59613.1
Solyc06g060090	SL3.0ch06	38110643	38112643	+	23	955	20	243	2.352	7.605	5.25282	0.000146051	1.60366	6.61912	0.000731319	0.0186044	No	meth_hyper_RNA_up	DnaJ domain protein	0	0	XP_004242043.1	AT1G21660.1
Solyc06g063260	SL3.0ch06	40083434	40085434	-	120	2431	264	2671	4.704	8.995	4.29085	8.00533e-10	3.1933	0.287233	0.000405188	0.0119128	No	meth_hyper_RNA_up	alpha-1,2-Mannosidase	GO:0004571|GO:0005509|GO:0016020	mannosyl-oligosaccharide 1,2-alpha-mannosidase activity | calcium ion binding | membrane	XP_004242262.1	AT1G51590.1
Solyc06g063345	SL3.0ch06	40149169	40151169	+	689	2778	833	2242	19.873	27.089	7.21634	1.55866e-11	8.1039	-0.635559	0.000656583	0.0173446	No	meth_hyper_RNA_up	Reticulon family protein	0	0	XP_004241922.1	0
Solyc06g065050	SL3.0ch06	40686592	40688592	-	2067	5277	3581	5209	28.145	40.739	12.5941	1.50104e-61	4.2566	-0.150883	0.00119991	0.0271292	No	meth_hyper_RNA_up	Late embryogenesis abundant protein (LEA) family protein	0	0	XP_010322771.1	AT1G72100.1
Solyc06g065400	SL3.0ch06	40932721	40934721	-	2395	9911	1555	4559	19.462	25.433	5.97138	1.94795e-19	1.70402	4.49385	5.74195e-06	0.000413235	No	meth_hyper_RNA_up	SNARE associated Golgi protein family	0	0	XP_004241822.1	AT4G09580.1
Solyc06g065570	SL3.0ch06	41083096	41085096	-	993	2397	1838	3055	29.292	37.564	8.27183	1.69161e-14	0.908836	6.83226	0.00216224	0.0425338	Yes	meth_hyper_RNA_up	acyl-CoA N-acyltransferases (NAT) superfamily protein	GO:0008080	N-acetyltransferase activity	NP_001333065.1	AT5G11340.1
Solyc06g066360	SL3.0ch06	41789100	41791100	-	367	1769	271	470	17.182	36.572	19.3906	3.91277e-25	9.34669	-0.390669	0.000584219	0.015915	Yes	meth_hyper_RNA_up	RING/FYVE/PHD zinc finger protein, putative	0	0	XP_025885888.1	AT5G16680.1
Solyc06g066380	SL3.0ch06	41790623	41792623	+	1973	2811	2269	2401	41.242	48.587	7.34508	1.91019e-12	1.53548	4.80298	0.000107658	0.00417648	Yes	meth_hyper_RNA_up	LOW QUALITY:Pentatricopeptide repeat-containing protein, putative	0	0	XP_004244339.1	AT5G66520.1
Solyc06g066640	SL3.0ch06	41992717	41994717	+	11055	7719	10207	6016	58.885	62.917	4.03222	4.21223e-14	4.13535	1.65928	0.000724424	0.0185462	No	meth_hyper_RNA_up	Photosystem I reaction center subunit VI	GO:0009522|GO:0009538|GO:0015979	photosystem I | photosystem I reaction center | photosynthesis	XP_004241734.1	AT3G16140.1
Solyc06g067940	SL3.0ch06	42224572	42226572	+	11563	7221	11826	5248	61.558	69.263	7.7055	1.56844e-51	1.11678	6.15927	4.95908e-05	0.00232472	No	meth_hyper_RNA_up	Cytochrome c oxidase subunit 5b	GO:0004129|GO:0005740	cytochrome-c oxidase activity | mitochondrial envelope	XP_004241710.1	AT1G80230.1
Solyc06g068570	SL3.0ch06	42614749	42616749	+	4762	5282	5883	5290	47.411	52.654	5.24233	8.04583e-14	6.54788	0.452042	0.00064407	0.0170898	No	meth_hyper_RNA_up	AP2-like ethylene-responsive transcription factor	GO:0003700|GO:0006355|GO:0007275	DNA-binding transcription factor activity | regulation of transcription, DNA-templated | multicellular organism development	XP_019069709.1	AT1G16060.1
Solyc06g069550	SL3.0ch06	43420096	43422096	+	765	9825	960	10963	7.224	8.052	0.827869	0.0121045	3.78458	1.18523	0.000182365	0.00635135	No	meth_hyper_RNA_up	UDP-glucose 6-dehydrogenase family protein	GO:0055114	oxidation-reduction process	XP_025887433.1	AT3G29360.1
Solyc06g069570	SL3.0ch06	43442640	43444640	+	1844	6723	2581	7722	21.524	25.051	3.5265	1.98083e-08	2.30905	6.81021	2.75467e-05	0.00147058	No	meth_hyper_RNA_up	Soluble N-ethylmaleimide-sensitive factor adaptor protein	GO:0005515	protein binding	XP_010322575.1	AT5G61210.1
Solyc06g069580	SL3.0ch06	43454965	43456965	-	5237	7302	6961	9062	41.766	43.444	1.67811	0.00296302	1.70621	2.95477	0.0020821	0.0414091	No	meth_hyper_RNA_up	Heparanase	GO:0016020|GO:0016798	membrane | hydrolase activity, acting on glycosyl bonds	XP_004241591.1	AT5G61250.2
Solyc06g069740	SL3.0ch06	43551664	43553664	-	2196	5556	2292	5428	28.328	29.689	1.36095	0.0326343	3.07033	1.14381	0.00183764	0.0379058	No	meth_hyper_RNA_up	EF hand calcium-binding family protein	GO:0005509	calcium ion binding	XP_004242172.1	AT3G29000.1
Solyc06g071290	SL3.0ch06	44003462	44005462	-	8760	6571	10892	7343	57.139	59.731	2.59216	1.97131e-06	2.26706	4.58361	0.00010702	0.00415625	Yes	meth_hyper_RNA_up	putative betaine aldehyde dehyrogenase	GO:0008152|GO:0016491|GO:0055114	metabolic process | oxidoreductase activity | oxidation-reduction process	NP_001333606.1	AT3G48170.1
Solyc06g071330	SL3.0ch06	44039505	44041505	-	70	2870	144	2564	2.381	5.318	2.93663	1.21636e-08	6.59781	5.3568	2.1716e-52	7.76738e-48	No	meth_hyper_RNA_up	Nucleobase-ascorbate transporter-like protein	GO:0005215|GO:0006810|GO:0016020|GO:0055085	transporter activity | transport | membrane | transmembrane transport	XP_025887081.1	AT5G62890.1
Solyc06g071390	SL3.0ch06	44065617	44067617	+	406	712	325	361	36.315	47.376	11.0612	4.76599e-06	2.57167	2.16823	8.67115e-05	0.00354125	Yes	meth_hyper_RNA_up	Deleted in split hand/splt foot protein 1	GO:0006406|GO:0008541|GO:0043248	mRNA export from nucleus | proteasome regulatory particle, lid subcomplex | proteasome assembly	XP_004241550.1	0
Solyc06g072240	SL3.0ch06	44650458	44652458	+	1932	4888	2378	5254	28.328	31.158	2.82984	0.000183576	6.02947	0.0607336	0.00191845	0.0391661	Yes	meth_hyper_RNA_up	histone H4	GO:0046982	protein heterodimerization activity	XP_004251292.1	AT5G59970.1
Solyc06g072670	SL3.0ch06	44959350	44961350	-	170	5446	235	5937	3.027	3.808	0.780452	0.0130005	6.6584	1.98021	1.08367e-05	0.000697137	No	meth_hyper_RNA_up	hydroxysteroid dehydrogenase 1	GO:0016491	oxidoreductase activity	XP_004241449.1	AT5G50700.1
Solyc06g072700	SL3.0ch06	44976460	44978460	-	4713	7803	4474	6762	37.656	39.818	2.16264	0.000494502	3.25311	3.51983	5.91698e-06	0.000422432	No	meth_hyper_RNA_up	Heavy metal transport/detoxification superfamily protein	GO:0030001|GO:0046872	metal ion transport | metal ion binding	XP_004241446.1	AT5G50740.3
Solyc06g073240	SL3.0ch06	45274918	45276918	-	5918	11035	7233	10374	34.908	41.08	6.17198	4.08708e-31	0.927375	4.74914	0.0021832	0.0428588	No	meth_hyper_RNA_up	Carbohydrate esterase plant-like protein	0	0	XP_004241415.1	AT4G34215.1
Solyc06g073245	SL3.0ch06	45277784	45279784	-	2782	8043	2797	7278	25.7	27.762	2.06202	0.000588306	1.8976	5.59184	0.00221188	0.0432767	No	meth_hyper_RNA_up	Calcium-binding protein	GO:0005509	calcium ion binding	XP_004241413.1	0
Solyc06g074420	SL3.0ch06	46192905	46194905	+	10411	8681	14009	9414	54.531	59.809	5.27804	7.57009e-27	7.50025	1.15832	3.48323e-06	0.000279346	No	meth_hyper_RNA_up	Cytochrome P450 family protein	GO:0005506|GO:0016705|GO:0020037|GO:0055114	iron ion binding | oxidoreductase activity, acting on paired donors, with incorporation or reduction of molecular oxygen | heme binding | oxidation-reduction process	XP_025887522.1	AT2G27690.1
Solyc06g074550	SL3.0ch06	46271581	46273581	+	2150	6980	1968	5906	23.549	24.994	1.44491	0.0160558	2.77733	2.45238	8.67406e-05	0.00354125	No	meth_hyper_RNA_up	LOW QUALITY:Histone-lysine N-methyltransferase ATX5	0	0	XP_010318013.1	0
Solyc06g074840	SL3.0ch06	46513293	46515293	+	3553	10675	3976	11066	24.972	26.433	1.46077	0.00291687	1.44964	5.64095	2.58084e-05	0.00140291	Yes	meth_hyper_RNA_up	Vacuolar protein sorting-associated protein 24 like 1	GO:0007034	vacuolar transport	XP_004241293.1	AT5G22950.1
Solyc06g075130	SL3.0ch06	46755821	46757821	+	861	5131	1171	5582	14.369	17.34	2.97128	5.69128e-06	4.67102	0.447938	0.000443038	0.0127282	No	meth_hyper_RNA_up	Pleckstrin-like (PH) and lipid-binding START domain protein	GO:0008289	lipid binding	XP_010322400.1	AT2G28320.1
Solyc06g075610	SL3.0ch06	47140632	47142632	-	2522	9316	2925	9727	21.304	23.119	1.8146	0.000498771	2.58033	4.70732	0.000681954	0.0178305	No	meth_hyper_RNA_up	LOW QUALITY:Exocyst subunit exo70 family protein	GO:0000145|GO:0006887	exocyst | exocytosis	XP_004241253.1	AT5G59730.1
Solyc06g076020	SL3.0ch06	47337132	47339132	-	1963	6708	2169	6986	22.639	23.692	1.05329	0.0488737	4.0511	8.85845	1.63941e-08	3.44932e-06	No	meth_hyper_RNA_up	heat shock protein 70 kD	0	0	NP_001234491.2	AT5G02500.1
Solyc06g076080	SL3.0ch06	47379915	47381915	-	1433	3517	2278	4284	28.949	34.715	5.76553	1.1231e-10	4.5505	3.94474	7.84745e-08	1.29948e-05	Yes	meth_hyper_RNA_up	Cell division cycle protein 48-related / CDC48-related isoform 1	0	0	XP_019070660.1	0
Solyc06g076170	SL3.0ch06	47446088	47448088	-	5950	10967	7425	12947	35.172	36.447	1.27536	0.00665903	9.74527	-0.285986	0.000311736	0.00967949	No	meth_hyper_RNA_up	Glucan endo-1,3-beta-glucosidase, putative	GO:0005975	carbohydrate metabolic process	XP_004241225.1	AT5G24318.1
Solyc06g076300	SL3.0ch06	47548798	47550798	-	3299	8256	3663	7035	28.55	34.24	5.68963	3.49389e-19	2.65297	4.19987	0.000492863	0.0139028	No	meth_hyper_RNA_up	Haloacid dehalogenase-like hydrolase	GO:0008152|GO:0016787	metabolic process | hydrolase activity	XP_010322341.1	AT5G59480.1
Solyc06g076310	SL3.0ch06	47551519	47553519	+	5138	9285	5928	9957	35.624	37.318	1.69457	0.00156974	3.55755	-0.0411807	0.000169624	0.00602994	No	meth_hyper_RNA_up	LOW QUALITY:cyclin-dependent kinase inhibitor	0	0	XP_025888670.1	0
Solyc06g076400	SL3.0ch06	47611819	47613819	+	5587	9496	6274	9876	37.042	38.848	1.80659	0.000781715	2.04489	5.09573	6.90103e-05	0.00299907	No	meth_hyper_RNA_up	Protein phosphatase 2C	GO:0043169	cation binding	XP_004241211.1	AT2G29380.1
Solyc06g076640	SL3.0ch06	47738373	47740373	-	9790	7196	12626	8138	57.636	60.807	3.17147	8.8248e-10	1.53289	6.47005	0.000113179	0.00433423	Yes	meth_hyper_RNA_up	Tubulin beta chain	GO:0005874|GO:0007017	microtubule | microtubule-based process	XP_004241186.1	AT5G23860.1
Solyc06g082440	SL3.0ch06	48297855	48299855	-	3359	6246	3382	5830	34.971	36.713	1.74161	0.00796331	3.20769	5.98711	4.05939e-06	0.000314959	No	meth_hyper_RNA_up	Non-specific serine/threonine protein kinase	GO:0007165	signal transduction	NP_001265893.1	AT2G30360.1
Solyc06g082780	SL3.0ch06	48509628	48511628	-	3583	10714	4247	11994	25.061	26.15	1.08867	0.016938	1.73436	4.33051	0.000518583	0.014463	No	meth_hyper_RNA_up	Calcium uniporter, mitochondrial	0	0	XP_004242468.1	AT1G09575.1
Solyc06g083140	SL3.0ch06	48728914	48730914	-	10704	7838	12277	8344	57.728	59.536	1.80799	0.000236324	2.5938	3.24701	0.00152493	0.0327713	No	meth_hyper_RNA_up	Auxin induced-like protein	0	0	XP_004242429.2	AT3G07390.1
Solyc06g083310	SL3.0ch06	48818335	48820335	-	3163	4987	3076	3996	38.81	43.495	4.68566	8.3773e-09	1.58111	7.70853	3.89451e-05	0.00193076	Yes	meth_hyper_RNA_up	Hexosyltransferase	GO:0047262	polygalacturonate 4-alpha-galacturonosyltransferase activity	XP_004242412.1	AT3G25140.1
Solyc06g083370	SL3.0ch06	48833043	48835043	+	30	1393	51	410	2.108	11.063	8.95468	1.78953e-13	8.52859	1.78032	1.00417e-09	3.35675e-07	No	meth_hyper_RNA_up	Trypsin-like cysteine/serine peptidase domain-containing protein	0	0	XP_004242413.1	AT3G07210.1
Solyc06g083390	SL3.0ch06	48848916	48850916	-	4405	8571	5917	7968	33.947	42.614	8.66704	6.18265e-47	1.97444	6.53338	0.000901917	0.0217657	Yes	meth_hyper_RNA_up	RPM1-interacting protein 4	0	0	XP_004242410.1	AT3G25070.1
Solyc06g083440	SL3.0ch06	48887395	48889395	+	1736	3933	1719	2813	30.623	37.93	7.30759	3.49479e-14	1.64708	3.5787	0.000465211	0.0132799	No	meth_hyper_RNA_up	Cytochrome b5	GO:0020037	heme binding	XP_004242405.1	AT2G32720.1
Solyc06g084030	SL3.0ch06	49337639	49339639	-	9093	7686	10829	7791	54.193	58.158	3.96515	1.92669e-13	2.41891	1.9427	0.0019269	0.0391969	Yes	meth_hyper_RNA_up	Methyltransferase-like protein	GO:0008152|GO:0008168	metabolic process | methyltransferase activity	XP_004242352.1	AT1G69523.1
Solyc06g084170	SL3.0ch06	49423122	49425122	+	4685	7816	5129	7213	37.477	41.557	4.08028	1.1195e-10	4.26283	-0.847397	0.000677696	0.0177754	Yes	meth_hyper_RNA_up	low-molecular-weight cysteine-rich 56	0	0	XP_010319434.1	0
Solyc06g084430	SL3.0ch06	49586853	49588853	+	6742	7337	7489	5929	47.887	55.813	7.92616	3.00811e-38	3.07039	4.35551	1.67545e-10	7.39845e-08	Yes	meth_hyper_RNA_up	Cupredoxin superfamily protein	0	0	XP_010327599.1	AT1G08880.1
Solyc07g005330	SL3.0ch07	264497	266497	-	1308	5833	1443	4980	18.317	22.466	4.14937	3.75745e-09	2.0154	6.83604	0.000352646	0.0106558	Yes	meth_hyper_RNA_up	Glucan endo-1,3-beta-glucosidase, putative	GO:0005975	carbohydrate metabolic process	NP_001234416.1	AT3G55430.1
Solyc07g005440	SL3.0ch07	340334	342334	-	240	4494	300	3333	5.07	8.258	3.18793	1.01177e-08	1.44416	6.97604	0.000236586	0.00781224	Yes	meth_hyper_RNA_up	Non-specific serine/threonine protein kinase	GO:0007165	signal transduction	XP_004242581.1	AT4G30960.1
Solyc07g007870	SL3.0ch07	2546742	2548742	+	10800	9028	13813	10286	54.468	57.318	2.8493	4.02717e-09	2.9038	6.37176	6.70228e-08	1.14935e-05	No	meth_hyper_RNA_up	12-oxophytodienoate reductase 3	GO:0010181|GO:0016491|GO:0055114	FMN binding | oxidoreductase activity | oxidation-reduction process	NP_001233873.1	AT2G06050.2
Solyc07g008180	SL3.0ch07	2914899	2916899	+	4978	8494	5351	8441	36.951	38.798	1.84714	0.00123989	1.38935	6.23823	5.12476e-05	0.00239298	Yes	meth_hyper_RNA_up	CRABS CLAW-like protein 5a	GO:0007275	multicellular organism development	XP_004242778.1	AT2G26580.1
Solyc07g008810	SL3.0ch07	3773651	3775651	+	4201	5153	4884	5607	44.911	46.554	1.64292	0.0120399	7.67972	-0.477219	0.000321102	0.00993529	No	meth_hyper_RNA_up	LOW QUALITY:Monovalent Cation:Proton antiporter-2 family	0	0	0	0
Solyc07g009050	SL3.0ch07	4022547	4024547	-	4459	5605	4777	5242	44.306	47.679	3.37297	2.04123e-06	4.90386	0.972926	0.000483042	0.0136797	No	meth_hyper_RNA_up	Defensin-like protein, putative	GO:0006952	defense response	XP_004242838.1	0
Solyc07g017880	SL3.0ch07	8253855	8255855	-	5082	6576	5838	6545	43.592	47.145	3.5529	5.11947e-08	9.03957	0.650105	0.000130749	0.00489186	Yes	meth_hyper_RNA_up	Peroxidase	GO:0004601|GO:0055114	peroxidase activity | oxidation-reduction process	XP_004242911.2	AT2G18980.1
Solyc07g018010	SL3.0ch07	8845587	8847587	-	5000	10963	6355	13410	31.322	32.153	0.830362	0.0473895	4.35304	2.37149	1.95551e-05	0.00112271	No	meth_hyper_RNA_up	bHLH transcription factor139	GO:0046983	protein dimerization activity	XP_004242918.1	AT5G57150.4
Solyc07g019460	SL3.0ch07	11519964	11521964	-	4660	6406	6503	7857	42.111	45.286	3.17454	5.84759e-07	1.2822	7.95003	0.000507941	0.0142271	No	meth_hyper_RNA_up	NADPH--cytochrome P450 reductase	GO:0016491|GO:0055114	oxidoreductase activity | oxidation-reduction process	XP_004242931.1	AT4G30210.1
Solyc07g021710	SL3.0ch07	21216375	21218375	+	9405	4930	12333	4973	65.609	71.264	5.65565	3.92845e-26	2.63011	0.974173	3.25423e-05	0.0016652	Yes	meth_hyper_RNA_up	Inorganic pyrophosphatase 2	GO:0016791	phosphatase activity	NP_001234501.2	AT1G73010.1
Solyc07g026710	SL3.0ch07	30487940	30489940	+	2565	5733	2867	4581	30.911	38.494	7.58249	1.30819e-22	8.51163	0.806031	9.19581e-13	6.85241e-10	No	meth_hyper_RNA_up	Transposon protein, putative, Mutator sub-class	0	0	XP_025886080.1	0
Solyc07g032380	SL3.0ch07	38301892	38303892	-	304	1412	303	1096	17.716	21.658	3.94271	0.00408942	4.59591	0.107481	7.5582e-05	0.0032031	No	meth_hyper_RNA_up	DNA LIGASE 6	0	0	XP_004240702.1	AT5G21222.1
Solyc07g032385	SL3.0ch07	38306048	38308048	-	4415	13828	5374	13910	24.201	27.868	3.6666	2.36761e-15	2.67902	6.25163	2.93287e-08	5.67752e-06	No	meth_hyper_RNA_up	Pentatricopeptide repeat-containing-like protein	GO:0005515	protein binding	XP_004243153.1	0
Solyc07g039440	SL3.0ch07	47589327	47591327	-	2321	4896	5455	6344	32.16	46.233	14.0726	5.09265e-81	4.22644	-0.516583	7.96793e-05	0.00332552	No	meth_hyper_RNA_up	LOW QUALITY:Disease resistance protein	GO:0043531	ADP binding	XP_010319324.1	AT3G46530.1
Solyc07g041735	SL3.0ch07	54194878	54196878	+	8106	7837	10457	9324	50.844	52.864	2.02023	0.000129783	1.77377	4.00595	7.07643e-05	0.00304951	No	meth_hyper_RNA_up	MOB kinase activator-like 1A	0	0	XP_025887771.1	0
Solyc07g041750	SL3.0ch07	54214825	54216825	-	9171	9925	11663	11028	48.026	51.399	3.37347	1.61092e-11	2.9828	6.60189	3.26147e-09	9.56198e-07	No	meth_hyper_RNA_up	O-fucosyltransferase family protein	0	0	XP_004243713.1	AT5G35570.1
Solyc07g043510	SL3.0ch07	57493158	57495158	+	8798	6434	11894	7957	57.76	59.916	2.1564	4.57357e-05	1.89248	6.80852	0.000113379	0.00433725	No	meth_hyper_RNA_up	OTU domain-containing	0	0	XP_004243635.1	AT3G22260.2
Solyc07g045010	SL3.0ch07	58204416	58206416	+	10369	10795	12271	12301	48.994	49.939	0.945381	0.0240778	3.82242	1.5158	0.00114586	0.0261718	No	meth_hyper_RNA_up	Aspartyl/glutamyl-tRNA(Asn/Gln) amidotransferase subunit B, putative isoform 1	0	0	XP_004243611.1	AT1G06660.1
Solyc07g045430	SL3.0ch07	58652883	58654883	+	3022	7971	3254	6852	27.49	32.199	4.70847	2.51484e-13	9.89475	-0.0568612	1.0544e-05	0.000681982	No	meth_hyper_RNA_up	Nudix hydrolase	GO:0016787	hydrolase activity	XP_004243574.1	AT5G47650.1
Solyc07g047940	SL3.0ch07	59271429	59273429	+	1318	8293	1922	7158	13.713	21.167	7.45395	5.34008e-40	5.37602	-0.171037	0.00158477	0.0338211	No	meth_hyper_RNA_up	Zinc finger transcription factor 49	GO:0046872	metal ion binding	XP_004243548.1	AT2G05160.1
Solyc07g048060	SL3.0ch07	59365805	59367805	+	3513	6214	4461	7271	36.116	38.024	1.90824	0.00277882	10.2287	1.38364	1.97484e-07	2.80302e-05	No	meth_hyper_RNA_up	Auxin-induced in root cultures protein 12, putative	0	0	XP_004243867.1	AT3G59070.1
Solyc07g049180	SL3.0ch07	59571966	59573966	-	3840	8817	4424	7804	30.339	36.179	5.84032	9.26536e-22	1.46325	5.15763	0.0012169	0.0273986	No	meth_hyper_RNA_up	LysM receptor-like kinase	GO:0005524	ATP binding	NP_001233773.1	AT3G21630.1
Solyc07g049680	SL3.0ch07	60160145	60162145	+	7391	6421	8785	6705	53.511	56.714	3.20257	5.86811e-08	6.9977	1.05826	6.71589e-08	1.14935e-05	No	meth_hyper_RNA_up	Condensin complex subunit 2	GO:0000796|GO:0007076	condensin complex | mitotic chromosome condensation	XP_004243494.1	AT2G32590.1
Solyc07g051820	SL3.0ch07	60448524	60450524	-	379	4625	1681	9512	7.574	15.018	7.44437	3.03377e-41	4.28377	4.52491	4.49634e-08	8.24745e-06	No	meth_hyper_RNA_up	Cellulose synthase family protein	GO:0016020|GO:0016760|GO:0030244	membrane | cellulose synthase (UDP-forming) activity | cellulose biosynthetic process	XP_004243487.1	AT2G32540.1
Solyc07g052250	SL3.0ch07	60867001	60869001	-	744	6572	4343	10838	10.169	28.608	18.4386	4.09471e-231	6.78168	0.921941	0.00169874	0.0357206	No	meth_hyper_RNA_up	Unknown	0	0	XP_004228601.1	0
Solyc07g052260	SL3.0ch07	60884407	60886407	-	978	8232	1387	10075	10.619	12.101	1.48196	0.000680898	7.22322	0.127139	5.31126e-05	0.00245977	No	meth_hyper_RNA_up	low-molecular-weight cysteine-rich 59	0	0	XP_010319434.1	0
Solyc07g052370	SL3.0ch07	61009321	61011321	+	2231	4877	2643	5202	31.387	33.69	2.30308	0.00194635	13.4486	3.27263	3.27653e-06	0.000265748	No	meth_hyper_RNA_up	Cytochrome P450	GO:0016705|GO:0055114	oxidoreductase activity, acting on paired donors, with incorporation or reduction of molecular oxygen | oxidation-reduction process	XP_004243471.1	AT3G26300.1
Solyc07g052400	SL3.0ch07	61044404	61046404	+	1863	8128	3037	10914	18.647	21.769	3.12227	5.82647e-09	1.71054	3.51293	0.00100484	0.0235989	No	meth_hyper_RNA_up	glutamate receptor-like 3.2	GO:0004970|GO:0016020	ionotropic glutamate receptor activity | membrane	XP_010323821.1	AT1G05200.1
Solyc07g052990	SL3.0ch07	61545292	61547292	+	7308	9115	8669	9527	44.499	47.642	3.14377	8.30501e-09	2.18284	5.68432	2.1633e-07	3.03301e-05	No	meth_hyper_RNA_up	LOW QUALITY:Ypt/Rab-GAP domain of gyp1p superfamily protein	0	0	XP_010314046.1	0
Solyc07g053170	SL3.0ch07	61752933	61754933	-	3724	8939	3708	7984	29.409	31.714	2.30548	8.63948e-05	2.23441	5.18178	5.19722e-05	0.00242365	No	meth_hyper_RNA_up	MAP kinase kinase kinase 56	0	0	XP_010323778.1	AT4G08500.1
Solyc07g053230	SL3.0ch07	61824064	61826064	+	5233	7576	5774	7644	40.854	43.032	2.17766	0.000292986	3.43727	5.35991	1.24811e-08	2.7388e-06	No	meth_hyper_RNA_up	R2R3MYB transcription factor 83	GO:0003677	DNA binding	XP_025887851.1	AT3G23250.1
Solyc07g053740	SL3.0ch07	62292728	62294728	+	7571	6138	9519	7169	55.226	57.041	1.81449	0.00110111	1.72654	8.75709	7.75013e-05	0.00325764	No	meth_hyper_RNA_up	Ethylene Response Factor F.4	GO:0003700|GO:0006355	DNA-binding transcription factor activity | regulation of transcription, DNA-templated	XP_004243371.1	AT5G44210.1
Solyc07g054490	SL3.0ch07	62930239	62932239	-	47	2213	62	2019	2.08	2.979	0.899691	0.033583	1.1682	5.44492	0.00111156	0.0255386	No	meth_hyper_RNA_up	Secretory carrier membrane family protein	GO:0015031|GO:0016021	protein transport | integral component of membrane	XP_004243323.1	AT1G61250.1
Solyc07g054830	SL3.0ch07	63138309	63140309	-	1818	9006	2094	9564	16.796	17.962	1.16591	0.0127304	1.71667	5.56414	0.000184688	0.00641353	No	meth_hyper_RNA_up	diacylglycerol kinase	GO:0016301	kinase activity	XP_025887602.1	AT2G20900.1
Solyc07g055710	SL3.0ch07	63781040	63783040	-	9783	10461	11915	11815	48.325	50.211	1.88527	7.60048e-05	5.27859	2.65907	0.000390196	0.0115248	Yes	meth_hyper_RNA_up	SolycHsfA4b	GO:0003700|GO:0005634|GO:0006355|GO:0043565	DNA-binding transcription factor activity | nucleus | regulation of transcription, DNA-templated | sequence-specific DNA binding	XP_004243245.1	AT5G45710.1
Solyc07g055910	SL3.0ch07	63942524	63944524	+	6825	9994	8297	9746	40.579	45.985	5.40549	1.87207e-23	2.06975	3.25358	0.000578887	0.0158179	No	meth_hyper_RNA_up	Embryonic flower 1	0	0	XP_010323640.1	AT3G58770.1
Solyc07g056000	SL3.0ch07	64030111	64032111	+	3694	6499	4964	7082	36.241	41.209	4.96814	1.20496e-13	3.45589	8.15991	3.57379e-07	4.5981e-05	No	meth_hyper_RNA_up	xyloglycan endo-transglycosylase	GO:0010411|GO:0016762|GO:0042546	xyloglucan metabolic process | xyloglucan:xyloglucosyl transferase activity | cell wall biogenesis	NP_001234207.1	AT4G14130.1
Solyc07g056040	SL3.0ch07	64070753	64072753	-	4006	7808	4292	6156	33.909	41.08	7.17071	2.73205e-27	5.8211	4.38894	1.12266e-35	6.69253e-32	No	meth_hyper_RNA_up	CASP-like protein	0	0	XP_004243226.1	AT1G17200.1
Solyc07g056170	SL3.0ch07	64187148	64189148	-	6327	8758	6998	9163	41.942	43.302	1.35945	0.00909204	5.24006	4.42995	1.61511e-07	2.40705e-05	No	meth_hyper_RNA_up	Subtilisin-like protease family protein	GO:0004252|GO:0006508	serine-type endopeptidase activity | proteolysis	XP_004243217.1	AT2G04160.1
Solyc07g056210	SL3.0ch07	64187148	64189148	-	6327	8758	6998	9163	41.942	43.302	1.35945	0.00909204	8.66733	-0.501415	0.00181256	0.0375183	No	meth_hyper_RNA_up	Heavy metal transport/detoxification superfamily protein, putative	GO:0030001|GO:0046872	metal ion transport | metal ion binding	XP_004243214.1	AT4G05030.1
Solyc07g062100	SL3.0ch07	65046508	65048508	-	3505	5054	4839	6637	40.951	42.166	1.21521	0.0426702	5.13852	0.781291	0.000330861	0.0101756	No	meth_hyper_RNA_up	PHD-zinc-finger-like domain protein	GO:0005515|GO:0008270	protein binding | zinc ion binding	XP_004244303.1	AT3G14740.2
Solyc07g062310	SL3.0ch07	65204398	65206398	+	1054	9421	1834	11938	10.062	13.317	3.25482	2.16851e-14	1.69062	4.22144	0.00126747	0.0283167	No	meth_hyper_RNA_up	UNE1-like protein	0	0	XP_004244284.1	AT1G53380.1
Solyc07g062480	SL3.0ch07	65332830	65334830	-	6446	8742	8203	10452	42.441	43.972	1.53072	0.00314448	10.5682	1.41593	1.57129e-05	0.000950962	No	meth_hyper_RNA_up	Serine/threonine-protein kinase	0	0	XP_004244276.2	AT1G78830.1
Solyc07g062530	SL3.0ch07	65355378	65357378	+	2903	8637	4898	12307	25.156	28.468	3.31249	1.11058e-09	1.08708	10.0699	0.000205417	0.00696433	No	meth_hyper_RNA_up	phosphoenolpyruvate carboxylase 2	GO:0006099|GO:0008964|GO:0015977	tricarboxylic acid cycle | phosphoenolpyruvate carboxylase activity | carbon fixation	XP_019070179.1	AT3G14940.1
Solyc07g062700	SL3.0ch07	65515692	65517692	-	3054	10022	4660	11505	23.356	28.828	5.47195	3.39164e-25	3.33974	8.29806	2.96624e-07	3.88632e-05	No	meth_hyper_RNA_up	sodium/calcium exchanger family protein / calcium-binding EF hand family protein	GO:0016021|GO:0055085	integral component of membrane | transmembrane transport	XP_004244257.1	AT1G53210.1
Solyc07g063240	SL3.0ch07	65895919	65897919	-	9507	9284	11511	10269	50.593	52.851	2.25787	6.38762e-06	2.31094	6.09172	1.0901e-06	0.000109987	No	meth_hyper_RNA_up	Protein silencing defective protein	0	0	XP_025887593.1	AT3G15390.1
Solyc07g063350	SL3.0ch07	65975585	65977585	-	1568	31037	3418	40819	4.809	7.727	2.91749	2.25593e-59	3.64969	5.65222	9.28011e-09	2.19822e-06	Yes	meth_hyper_RNA_up	COP1-interacting protein, putative	0	0	XP_019070534.1	AT4G27430.1
Solyc07g064230	SL3.0ch07	66593394	66595394	-	4894	8461	6028	9650	36.645	38.449	1.80333	0.00114125	3.03656	2.27927	2.38206e-08	4.78659e-06	Yes	meth_hyper_RNA_up	Ypt/Rab-GAP domain of gyp1p superfamily protein	0	0	XP_004244147.1	AT4G27100.1
Solyc07g065090	SL3.0ch07	67130413	67132413	-	6939	4728	6539	4092	59.475	61.509	2.03335	0.00138518	1.62047	5.4539	0.000360844	0.0108277	Yes	meth_hyper_RNA_up	polygalacturonase inhibitor protein	GO:0005515	protein binding	NP_001317655.1	AT5G06860.1
Solyc07g065440	SL3.0ch07	67327551	67329551	-	4550	5974	6307	6863	43.235	47.889	4.65463	2.50588e-12	2.73974	-0.330446	0.00246812	0.0468576	Yes	meth_hyper_RNA_up	Heavy metal transport/detoxification superfamily protein	0	0	XP_025888787.1	AT3G13170.1
Solyc08g006260	SL3.0ch08	942811	944811	+	1946	5166	2290	5661	27.362	28.801	1.4392	0.0265663	2.01045	2.07032	0.00133925	0.029522	No	meth_hyper_RNA_up	Transcriptional factor B3 family protein	GO:0003677	DNA binding	XP_010324528.1	AT4G00260.1
Solyc08g007090	SL3.0ch08	1658587	1660587	-	92	77	106	60	54.438	63.855	9.41755	0.0474735	7.85092	-0.319754	0.000988166	0.0233145	No	meth_hyper_RNA_up	Expansin-like protein	0	0	XP_004245860.1	AT4G38400.1
Solyc08g007805	SL3.0ch08	2323215	2325215	+	1821	3986	1943	3404	31.359	36.338	4.97943	4.32814e-08	3.41994	3.71976	3.04081e-05	0.00158779	Yes	meth_hyper_RNA_up	NADH dehydrogenase 1 alpha subcomplex subunit 8	0	0	XP_004245656.1	0
Solyc08g007830	SL3.0ch08	2339834	2341834	-	4970	10412	6388	12086	32.31	34.578	2.26783	1.17577e-05	5.69733	3.47564	1.88857e-06	0.00017385	No	meth_hyper_RNA_up	C-repeat binding factor	GO:0003700|GO:0006355	DNA-binding transcription factor activity | regulation of transcription, DNA-templated	XP_004244599.1	AT1G12610.1
Solyc08g008280	SL3.0ch08	2702124	2704124	-	4298	7963	5242	8664	35.054	37.696	2.64172	1.01306e-05	5.26168	5.77178	1.24818e-07	1.91609e-05	No	meth_hyper_RNA_up	WRKY transcription factor 53	GO:0003700|GO:0006355|GO:0043565	DNA-binding transcription factor activity | regulation of transcription, DNA-templated | sequence-specific DNA binding	XP_004244630.1	AT4G23810.1
Solyc08g008500	SL3.0ch08	2888333	2890333	+	5427	9798	5764	9469	35.645	37.839	2.19358	6.57298e-05	6.63584	-0.188094	0.000103856	0.00405982	No	meth_hyper_RNA_up	Dof zinc finger protein	GO:0003677|GO:0006355	DNA binding | regulation of transcription, DNA-templated	XP_004244646.1	AT4G24060.1
Solyc08g014570	SL3.0ch08	4789996	4791996	+	5526	8292	6744	9374	39.991	41.841	1.8501	0.000880878	2.88625	3.7467	0.000273761	0.00882152	No	meth_hyper_RNA_up	Ankyrin repeat family protein	GO:0005515	protein binding	XP_004244774.1	AT2G31820.1
Solyc08g036620	SL3.0ch08	10662073	10664073	+	6183	9764	8147	11741	38.772	40.964	2.19222	2.53045e-05	6.93595	1.748	0.000190645	0.00656641	No	meth_hyper_RNA_up	Jasmonate zim-domain protein	0	0	XP_004244919.1	AT1G30135.1
Solyc08g036625	SL3.0ch08	10669484	10671484	+	8481	7675	9400	7564	52.494	55.411	2.91703	1.50394e-07	9.04475	0.707359	0.000140574	0.00519962	Yes	meth_hyper_RNA_up	Jasmonate ZIM-domain protein 12a	0	0	XP_004244920.1	0
Solyc08g041710	SL3.0ch08	26159877	26161877	+	2939	7384	4291	7994	28.47	34.929	6.45837	2.38085e-24	1.37238	5.20512	7.84324e-05	0.00328498	No	meth_hyper_RNA_up	transmembrane protein	0	0	XP_004244937.1	AT2G12400.1
Solyc08g023510	SL3.0ch08	27546301	27548301	-	5986	4461	6982	4863	57.299	58.945	1.64596	0.00801803	6.92638	0.359155	0.00101232	0.0237248	No	meth_hyper_RNA_up	Serine incorporator 4	0	0	XP_004244866.2	0
Solyc08g028780	SL3.0ch08	40095270	40097270	-	3539	4438	4421	4846	44.365	47.707	3.34187	1.23435e-05	3.29649	4.34079	3.75875e-06	0.000298762	No	meth_hyper_RNA_up	LOW QUALITY:DUF868 family protein	0	0	XP_004244888.1	AT5G11000.1
Solyc08g062330	SL3.0ch08	50968518	50970518	+	7548	11319	8753	11892	40.006	42.398	2.39131	1.75607e-06	3.30675	3.6564	4.57476e-05	0.00218174	Yes	meth_hyper_RNA_up	Ankyrin repeat family protein	GO:0005515	protein binding	XP_004245062.1	AT5G51160.1
Solyc08g063090	SL3.0ch08	52732452	52734452	+	7621	8025	10558	9951	48.709	51.48	2.7709	2.56205e-07	3.35614	4.82772	5.84118e-10	2.15389e-07	No	meth_hyper_RNA_up	Sphingolipid delta-8 desaturase	GO:0006629	lipid metabolic process	XP_019070949.1	AT2G46210.1
Solyc08g065970	SL3.0ch08	54431245	54433245	+	3260	6520	4285	7549	33.333	36.209	2.87589	1.06665e-05	1.25196	3.72256	0.000980736	0.0232157	No	meth_hyper_RNA_up	Sigma factor	GO:0003677|GO:0003700|GO:0006352|GO:0006355|GO:0016987	DNA binding | DNA-binding transcription factor activity | DNA-templated transcription, initiation | regulation of transcription, DNA-templated | sigma factor activity	XP_004245130.1	AT3G53920.1
Solyc08g066100	SL3.0ch08	54599045	54601045	-	3710	9532	4365	10580	28.017	29.207	1.19018	0.0155293	2.18818	6.1188	1.5392e-13	1.37635e-10	No	meth_hyper_RNA_up	ATP-dependent 6-phosphofructokinase	GO:0003872|GO:0006096	6-phosphofructokinase activity | glycolytic process	XP_004245136.1	AT4G26270.1
Solyc08g066330	SL3.0ch08	54929413	54931413	+	9104	9146	11306	10463	49.885	51.936	2.05131	4.17736e-05	2.35375	4.94339	4.75742e-06	0.000361281	No	meth_hyper_RNA_up	LEY17225 cyclin-dependent protein kinase A-1	GO:0005524	ATP binding	NP_001234376.2	AT3G48750.1
Solyc08g066440	SL3.0ch08	55136349	55138349	-	5227	11084	6660	11837	32.046	36.006	3.95998	2.60243e-14	2.51251	6.26445	5.66093e-08	1.00736e-05	No	meth_hyper_RNA_up	Alpha/beta-Hydrolases superfamily protein	0	0	XP_004245152.1	AT5G11650.1
Solyc08g067390	SL3.0ch08	56483689	56485689	+	207	840	64	106	19.771	37.647	17.8763	1.02858e-06	4.15348	0.208798	0.000440975	0.0126791	No	meth_hyper_RNA_up	EG45-like domain containing protein	0	0	XP_004245213.1	AT2G18660.1
Solyc08g068600	SL3.0ch08	57796816	57798816	-	6518	8372	7993	9037	43.774	46.935	3.16048	2.47715e-08	3.76614	6.20568	6.82807e-07	7.56119e-05	No	meth_hyper_RNA_up	Aromatic amino acid decarboxylase 1B	GO:0016831|GO:0019752|GO:0030170	carboxy-lyase activity | carboxylic acid metabolic process | pyridoxal phosphate binding	XP_004245279.1	AT1G43710.1
Solyc08g068620	SL3.0ch08	57813097	57815097	-	7162	4305	9249	4577	62.457	66.896	4.43822	5.9012e-13	4.06419	0.46198	0.000310936	0.00967093	No	meth_hyper_RNA_up	Decarboxylase family protein IPR002129 Pyridoxal phosphate-dependent decarboxylase	GO:0016831|GO:0019752|GO:0030170	carboxy-lyase activity | carboxylic acid metabolic process | pyridoxal phosphate binding	XP_004245427.1	AT1G43710.1
Solyc08g068630	SL3.0ch08	57830146	57832146	-	3681	8858	4980	8951	29.356	35.748	6.39121	1.66818e-27	5.27803	0.700255	0.000426127	0.0123604	No	meth_hyper_RNA_up	Decarboxylase family protein IPR002129 Pyridoxal phosphate-dependent decarboxylase	GO:0016831|GO:0019752|GO:0030170	carboxy-lyase activity | carboxylic acid metabolic process | pyridoxal phosphate binding	XP_004245280.2	AT1G43710.1
Solyc08g068690	SL3.0ch08	57884875	57886875	-	5672	9026	6908	10455	38.59	39.786	1.19547	0.0163984	3.03578	8.92252	9.02386e-09	2.17158e-06	No	meth_hyper_RNA_up	Tyramine n-hydroxycinnamoyl transferase	GO:0008080	N-acetyltransferase activity	XP_004245283.1	AT2G39030.1
Solyc08g074480	SL3.0ch08	58700880	58702880	+	3145	8460	3380	8588	27.1	28.242	1.14159	0.0270841	1.92765	10.825	0.00010815	0.00418196	No	meth_hyper_RNA_up	14 kDa proline-rich protein DC2.15	0	0	XP_004246067.1	AT2G45180.1
Solyc08g074705	SL3.0ch08	58980691	58982691	-	485	9014	713	10440	5.106	6.393	1.2871	7.2509e-05	5.92169	3.00514	4.19047e-06	0.000323027	No	meth_hyper_RNA_up	tubulin-tyrosine ligase	0	0	XP_010321626.2	0
Solyc08g076390	SL3.0ch08	60518298	60520298	+	373	5825	560	6699	6.018	7.715	1.69649	0.000103918	3.60552	6.20713	1.04461e-07	1.66061e-05	No	meth_hyper_RNA_up	Lysine-specific demethylase	0	0	XP_010325573.1	AT5G46910.1
Solyc08g077020	SL3.0ch08	61088466	61090466	-	1122	6197	1591	6073	15.33	20.759	5.42943	2.77853e-17	2.48243	5.78636	1.94064e-06	0.000176623	No	meth_hyper_RNA_up	Auxin responsive SAUR protein	GO:0009733	response to auxin	XP_004245888.1	AT2G35290.1
Solyc08g077560	SL3.0ch08	61660068	61662068	+	4779	8025	5317	8261	37.324	39.159	1.83466	0.00158727	2.10313	7.09044	0.000468807	0.0133399	No	meth_hyper_RNA_up	Kinase family protein	GO:0005524	ATP binding	XP_004245841.1	AT5G47070.1
Solyc08g077870	SL3.0ch08	61905688	61907688	-	10266	7179	10542	6933	58.848	60.326	1.47837	0.003236	4.63712	2.21901	9.05755e-05	0.00366897	No	meth_hyper_RNA_up	Pentatricopeptide repeat (PPR) superfamily protein	0	0	XP_004245826.2	0
Solyc08g077900	SL3.0ch08	61923909	61925909	+	5536	9630	5832	9510	36.503	38.013	1.51059	0.00415816	6.5634	-0.223949	0.000326787	0.0100763	Yes	meth_hyper_RNA_up	Expansin-like protein	GO:0005576	extracellular region	XP_004245823.1	AT4G17030.1
Solyc08g079090	SL3.0ch08	62854356	62856356	+	2301	10558	2694	10767	17.894	20.013	2.11929	1.28403e-05	3.85484	7.02573	3.92019e-08	7.22771e-06	No	meth_hyper_RNA_up	Monocopper oxidase-like protein SKU5	GO:0055114	oxidation-reduction process	XP_004245738.1	AT4G12420.1
Solyc08g079140	SL3.0ch08	62908126	62910126	+	4103	6750	4436	6932	37.805	39.022	1.2166	0.0324919	3.60727	0.581684	0.00236481	0.0452649	Yes	meth_hyper_RNA_up	Small auxin up-regulated RNA67	GO:0009733	response to auxin	XP_010325465.1	AT3G60690.1
Solyc08g079310	SL3.0ch08	63019821	63021821	+	7352	8106	8522	8416	47.561	50.313	2.75177	9.84289e-07	5.55719	-0.665894	0.00214811	0.0423558	No	meth_hyper_RNA_up	Cytochrome P450 family protein	GO:0016705|GO:0055114	oxidoreductase activity, acting on paired donors, with incorporation or reduction of molecular oxygen | oxidation-reduction process	XP_010325460.1	AT4G12320.1
Solyc08g079420	SL3.0ch08	63071150	63073150	+	12387	6365	14057	6400	66.057	68.715	2.65791	3.35994e-08	4.66272	1.85199	0.00122763	0.027599	Yes	meth_hyper_RNA_up	Cytochrome P450	GO:0016705|GO:0055114	oxidoreductase activity, acting on paired donors, with incorporation or reduction of molecular oxygen | oxidation-reduction process	XP_004245718.1	AT4G12320.1
Solyc08g079510	SL3.0ch08	63136349	63138349	+	2202	7748	2556	7609	22.131	25.145	3.01445	6.40971e-07	2.50956	4.66985	3.93072e-09	1.12475e-06	No	meth_hyper_RNA_up	cyclin-dependent kinase-like protein	0	0	XP_004245707.1	AT1G12330.1
Solyc08g079590	SL3.0ch08	63214421	63216421	+	7999	10329	9859	11208	43.644	46.798	3.1547	7.16971e-10	2.31518	3.20739	7.76167e-05	0.00325844	Yes	meth_hyper_RNA_up	Pentatricopeptide (PPR) repeat-containing protein-like	0	0	XP_004245701.1	AT4G22758.1
Solyc08g079690	SL3.0ch08	63289928	63291928	-	3247	9548	3366	9437	25.377	26.291	0.913613	0.0484359	2.03119	3.30976	0.000164254	0.00587504	Yes	meth_hyper_RNA_up	Homeobox-leucine zipper protein HOX9, putative	0	0	XP_019066617.1	AT3G60890.2
Solyc08g079900	SL3.0ch08	63446430	63448430	+	4707	6146	5110	5333	43.37	48.932	5.5618	1.64836e-15	7.76221	3.73654	1.18572e-06	0.000118466	No	meth_hyper_RNA_up	subtilisin-like protease	GO:0004252|GO:0006508	serine-type endopeptidase activity | proteolysis	XP_019070934.1	AT5G67360.1
Solyc08g080650	SL3.0ch08	64003153	64005153	+	790	5809	1133	7317	11.972	13.408	1.43677	0.00568313	3.74929	7.82903	0.000346702	0.010536	Yes	meth_hyper_RNA_up	Osmotin-like protein (Fragment) IPR001938 Thaumatin, pathogenesis-related	0	0	NP_001296216.1	AT4G11650.1
Solyc08g080670	SL3.0ch08	64012606	64014606	-	661	4293	1863	5298	13.343	26.016	12.6732	7.06239e-65	5.76937	2.47437	0.000246849	0.00810772	Yes	meth_hyper_RNA_up	Pathogenesis-related 5-like protein	0	0	NP_001234351.2	AT4G11650.1
Solyc08g080940	SL3.0ch08	64203433	64205433	+	924	2557	1377	3255	26.544	29.728	3.18388	0.00123309	1.06643	8.2808	9.4526e-05	0.00377885	Yes	meth_hyper_RNA_up	glutathione peroxidase like encoding 1	GO:0004602|GO:0006979|GO:0055114	glutathione peroxidase activity | response to oxidative stress | oxidation-reduction process	NP_001234567.2	AT4G11600.1
Solyc08g082430	SL3.0ch08	65357103	65359103	+	1340	2344	1620	2448	36.374	39.823	3.4495	0.00132311	1.18571	5.89591	0.000764179	0.0192352	Yes	meth_hyper_RNA_up	Nucleoside diphosphate kinase	GO:0004550|GO:0006165|GO:0006183|GO:0006228|GO:0006241	nucleoside diphosphate kinase activity | nucleoside diphosphate phosphorylation | GTP biosynthetic process | UTP biosynthetic process | CTP biosynthetic process	XP_010325356.1	AT4G23900.1
Solyc08g082610	SL3.0ch08	65452994	65454994	-	534	8771	826	11865	5.739	6.509	0.769699	0.0116993	1.32109	9.2015	0.00224938	0.043726	No	meth_hyper_RNA_up	DCD (Development and Cell Death) domain protein	0	0	XP_004245501.1	AT5G42050.1
Solyc09g007890	SL3.0ch09	1415895	1417895	-	1577	7324	1749	6971	17.717	20.057	2.34023	6.65543e-05	2.42673	3.04338	6.41387e-05	0.00284201	No	meth_hyper_RNA_up	Phenylalanine ammonia-lyase	GO:0016841	ammonia-lyase activity	XP_025888883.1	AT2G37040.1
Solyc09g007920	SL3.0ch09	1433486	1435486	+	3026	6992	3580	7210	30.206	33.179	2.97324	4.95876e-06	2.37034	7.02657	5.51291e-06	0.000403243	Yes	meth_hyper_RNA_up	Phenylalanine ammonia-lyase	GO:0016841	ammonia-lyase activity	XP_004246649.1	AT2G37040.1
Solyc09g007940	SL3.0ch09	1437897	1439897	+	1847	4032	1651	3332	31.417	33.133	1.71574	0.0303656	5.24008	1.25896	0.00146681	0.0317007	Yes	meth_hyper_RNA_up	Adenosine kinase, putative	GO:0016773	phosphotransferase activity, alcohol group as acceptor	XP_004246653.1	AT5G03300.1
Solyc09g008010	SL3.0ch09	1483966	1485966	+	121	6289	200	8100	1.888	2.41	0.521963	0.0193616	1.34321	5.82755	0.00172841	0.0361743	No	meth_hyper_RNA_up	Kinase family protein	GO:0005524	ATP binding	XP_010325980.1	AT3G09830.1
Solyc09g008280	SL3.0ch09	1746209	1748209	+	4148	9808	4820	10884	29.722	30.693	0.970834	0.0360086	3.20704	-1.32051	0.000948676	0.0225757	No	meth_hyper_RNA_up	S-adenosyl-L-methionine synthetase Z24743	GO:0004478|GO:0006556	methionine adenosyltransferase activity | S-adenosylmethionine biosynthetic process	NP_001304005.1	AT2G36880.1
Solyc09g010000	SL3.0ch09	3450286	3452286	-	504	2725	618	2416	15.609	20.369	4.7606	1.28132e-06	2.13273	4.02526	0.0010417	0.0242574	No	meth_hyper_RNA_up	2-oxoglutarate (2OG) and Fe(II)-dependent oxygenase superfamily protein	GO:0016491|GO:0055114	oxidoreductase activity | oxidation-reduction process	XP_004246496.1	AT1G06620.1
Solyc09g010060	SL3.0ch09	3458443	3460443	+	8216	7524	10808	7270	52.198	59.785	7.58715	2.31849e-43	3.85771	1.33294	0.00197658	0.0397852	Yes	meth_hyper_RNA_up	Kinesin-related protein	GO:0003777|GO:0005524|GO:0007018|GO:0008017	microtubule motor activity | ATP binding | microtubule-based movement | microtubule binding	XP_004246491.1	AT2G36200.2
Solyc09g010690	SL3.0ch09	4014164	4016164	+	4633	9216	5928	9971	33.454	37.285	3.83168	1.38691e-11	1.31617	6.08613	0.00133971	0.029522	No	meth_hyper_RNA_up	Ankyrin repeat family protein	GO:0005515|GO:0008270	protein binding | zinc ion binding	NP_001266220.1	AT2G28840.1
Solyc09g010940	SL3.0ch09	4282297	4284297	-	10983	10333	14238	11381	51.525	55.576	4.05126	9.24436e-18	1.33157	6.13933	0.00150262	0.0323541	No	meth_hyper_RNA_up	Haloacid dehalogenase-like hydrolase	GO:0008152|GO:0016787	metabolic process | hydrolase activity	XP_004246419.1	AT5G02230.1
Solyc09g011060	SL3.0ch09	4394099	4396099	-	7882	7053	6975	5360	52.775	56.546	3.77105	9.80226e-10	3.82459	0.367924	0.000697481	0.018091	Yes	meth_hyper_RNA_up	Clade IV lectin receptor kinase	GO:0030246	carbohydrate binding	XP_025888688.1	AT2G37710.1
Solyc09g011690	SL3.0ch09	4950750	4952750	+	2397	7376	3510	7890	24.527	30.789	6.26272	2.44426e-23	1.78824	7.22823	4.84238e-06	0.000364249	No	meth_hyper_RNA_up	WAS/WASL-interacting protein family member 2, putative isoform 1	0	0	XP_004246375.1	AT3G54000.1
Solyc09g011860	SL3.0ch09	5135757	5137757	-	7701	7217	9472	8273	51.622	53.378	1.75622	0.0011452	3.12441	5.09331	0.000102603	0.00401962	Yes	meth_hyper_RNA_up	O-fucosyltransferase family protein	0	0	XP_004246361.1	AT2G37980.1
Solyc09g014610	SL3.0ch09	6261526	6263526	-	12128	8424	14239	9326	59.011	60.424	1.41307	0.00177904	2.44673	2.20186	0.00151135	0.0325062	Yes	meth_hyper_RNA_up	S-type anion channel	GO:0016021|GO:0055085	integral component of membrane | transmembrane transport	XP_004246840.2	AT5G24030.1
Solyc09g014860	SL3.0ch09	7065069	7067069	-	315	569	4140	5857	35.633	41.412	5.77894	0.000605407	8.88368	-0.180923	2.1708e-07	3.03301e-05	No	meth_hyper_RNA_up	LURP-one-like protein	0	0	XP_004246313.1	AT5G01750.2
Solyc09g014990	SL3.0ch09	7393826	7395826	+	38	2221	751	5471	1.682	12.07	10.3879	7.01345e-61	4.96738	5.66022	8.80322e-06	0.000597451	No	meth_hyper_RNA_up	WRKY transcription factor 33	GO:0003700|GO:0006355|GO:0043565	DNA-binding transcription factor activity | regulation of transcription, DNA-templated | sequence-specific DNA binding	XP_004246308.1	AT2G38470.1
Solyc09g015040	SL3.0ch09	7852815	7854815	+	140	2559	4235	13709	5.187	23.601	18.4141	4.91764e-133	1.38799	7.1637	4.70786e-05	0.0022333	Yes	meth_hyper_RNA_up	LOW QUALITY:S-adenosyl-L-methionine-dependent methyltransferases superfamilyprotein	GO:0008152|GO:0008168	metabolic process | methyltransferase activity	XP_004246304.1	AT5G01710.1
Solyc09g015490	SL3.0ch09	9227504	9229504	-	48	133	6801	9263	26.519	42.337	15.8176	1.43226e-05	5.08387	2.93404	1.23321e-20	2.32154e-17	No	meth_hyper_RNA_up	Phosphoenolpyruvate carboxylase	GO:0006099|GO:0008964|GO:0015977	tricarboxylic acid cycle | phosphoenolpyruvate carboxylase activity | carbon fixation	XP_004236950.1	AT1G68750.1
Solyc09g016950	SL3.0ch09	11862214	11864214	+	18	67	186	169	21.176	52.394	31.2179	1.82293e-07	10.0518	4.00641	1.11825e-47	1.33326e-43	No	meth_hyper_RNA_up	Concanavalin A-like lectin protein kinase family protein	0	0	XP_019071253.1	0
Solyc09g018030	SL3.0ch09	12643795	12645795	-	1475	3752	6448	9731	28.219	39.854	11.6353	1.08426e-51	1.81085	2.56084	0.00116731	0.0265263	No	meth_hyper_RNA_up	MACPF domain protein	0	0	XP_010325754.1	AT1G29690.1
Solyc09g018785	SL3.0ch09	17008591	17010591	-	657	440	1777	815	59.891	68.557	8.66649	6.56366e-07	6.9054	-2.32734	3.47703e-05	0.00175411	No	meth_hyper_RNA_up	RNI-like superfamily protein isoform 2	0	0	XP_010325705.1	0
Solyc09g018840	SL3.0ch09	17576801	17578801	+	3008	930	6761	1747	76.384	79.466	3.08243	9.64434e-05	8.31635	1.78803	7.57582e-19	1.29034e-15	No	meth_hyper_RNA_up	MLO-like protein	GO:0006952|GO:0016021	defense response | integral component of membrane	NP_001335375.1	AT4G02600.1
Solyc09g018960	SL3.0ch09	17768013	17770013	-	595	1589	3945	6714	27.244	37.011	9.76739	5.68822e-18	9.47126	1.7666	4.88333e-10	1.8386e-07	No	meth_hyper_RNA_up	Chaperone DnaJ-domain superfamily protein	0	0	XP_010325724.1	AT4G12780.1
Solyc09g042230	SL3.0ch09	22852822	22854822	+	517	1703	6928	11564	23.288	37.465	14.1766	1.83342e-40	8.99957	-0.042995	1.0806e-08	2.47761e-06	No	meth_hyper_RNA_up	LOW QUALITY:AIG2-like (avirulence induced gene) family protein	0	0	XP_004245532.1	0
Solyc09g042260	SL3.0ch09	22919182	22921182	-	504	2760	4033	13252	15.441	23.332	7.89119	5.97e-24	0.909502	4.65101	0.00245105	0.0466326	No	meth_hyper_RNA_up	Protein kinase atsik, putative	GO:0004672|GO:0006468	protein kinase activity | protein phosphorylation	XP_004246978.1	AT3G08760.1
Solyc09g042785	SL3.0ch09	25830809	25832809	+	371	1024	6931	5788	26.595	54.493	27.8983	6.99685e-88	10.6697	2.57793	9.85186e-29	3.20347e-25	No	meth_hyper_RNA_up	DNA gyrase subunit A, chloroplastic/mitochondrial	0	0	XP_004232503.1	0
Solyc09g031920	SL3.0ch09	27806872	27808872	+	295	625	11508	8093	32.065	58.711	26.6461	1.76484e-55	2.68988	5.44084	7.87618e-12	5.12209e-09	No	meth_hyper_RNA_up	LOW QUALITY:Late embryogenesis abundant hydroxyproline-rich glycoprotein	0	0	XP_004246969.1	AT3G54200.1
Solyc09g031610	SL3.0ch09	29329715	29331715	-	2168	1915	9317	5699	53.098	62.047	8.94894	6.24188e-24	1.66831	4.20231	4.57353e-07	5.48947e-05	No	meth_hyper_RNA_up	DAMAGED DNA BINDING PROTEIN1	GO:0005515	protein binding	XP_004246959.1	AT5G58760.1
Solyc09g031520	SL3.0ch09	30765978	30767978	-	5	25	2569	5033	16.667	33.794	17.1271	0.0278942	6.45915	-1.80566	3.75119e-05	0.0018687	No	meth_hyper_RNA_up	LOW QUALITY:Phosphoglycerate mutase family protein	0	0	0	0
Solyc09g031523	SL3.0ch09	30817862	30819862	-	21	496	2549	4960	4.062	33.946	29.884	3.35699e-58	7.31286	-0.44284	4.88075e-08	8.90687e-06	No	meth_hyper_RNA_up	P-loop containing nucleoside triphosphate hydrolases superfamily protein	0	0	XP_010320708.1	0
Solyc09g047930	SL3.0ch09	33949710	33951710	+	185	1914	3170	7897	8.814	28.644	19.83	6.00705e-95	3.8516	2.27222	1.5714e-09	4.88745e-07	No	meth_hyper_RNA_up	maternal effect embryo arrest protein	0	0	XP_019071347.1	AT3G07510.1
Solyc09g056160	SL3.0ch09	47401808	47403808	+	2746	2111	13749	8754	56.537	61.099	4.56156	7.46489e-09	0.868244	6.15918	0.00193919	0.0393426	Yes	meth_hyper_RNA_up	Chaperone surA	0	0	XP_004247029.1	AT5G48470.1
Solyc09g056270	SL3.0ch09	48759430	48761430	+	16	75	11934	6960	17.582	63.163	45.5805	5.4152e-18	10.432	2.37857	4.00684e-28	1.19431e-24	No	meth_hyper_RNA_up	Chlorophyllide a oxygenase, chloroplastic	0	0	XP_004250311.1	0
Solyc09g056340	SL3.0ch09	49010156	49012156	+	777	1433	6307	5574	35.158	53.085	17.9264	4.32473e-53	2.22993	6.19496	1.70039e-07	2.50286e-05	No	meth_hyper_RNA_up	Ras family	GO:0005525|GO:0007264	GTP binding | small GTPase mediated signal transduction	XP_004247033.1	AT3G07410.1
Solyc09g056360	SL3.0ch09	49072610	49074610	+	1850	2133	16057	9426	46.447	63.011	16.5632	2.16123e-84	1.84109	4.59061	6.19737e-06	0.000438078	No	meth_hyper_RNA_up	Auxin induced-like protein	0	0	XP_004247035.1	AT3G25290.1
Solyc09g056385	SL3.0ch09	49158245	49160245	-	570	3141	2560	7667	15.36	25.032	9.67204	2.85055e-34	3.44005	3.34857	4.44659e-07	5.37316e-05	No	meth_hyper_RNA_up	auxin-induced in root cultures-like protein	0	0	XP_004247036.1	0
Solyc09g057650	SL3.0ch09	50311890	50313890	-	126	405	7800	8264	23.729	48.556	24.827	6.82539e-30	2.55482	5.37886	1.48028e-11	8.67981e-09	No	meth_hyper_RNA_up	40S ribosomal protein S8	GO:0003735|GO:0005622|GO:0005840|GO:0006412	structural constituent of ribosome | intracellular | ribosome | translation	XP_004247043.1	AT5G59240.1
Solyc09g059240	SL3.0ch09	54108207	54110207	+	127	497	2826	7723	20.353	26.789	6.43671	0.00025895	8.99609	3.37039	9.29012e-06	0.000624603	No	meth_hyper_RNA_up	Cytochrome P450, putative	GO:0016705|GO:0055114	oxidoreductase activity, acting on paired donors, with incorporation or reduction of molecular oxygen | oxidation-reduction process	XP_004247061.1	AT4G31940.1
Solyc09g059260	SL3.0ch09	54272809	54274809	-	1	153	1773	8317	0.649	17.572	16.9225	2.01548e-11	8.35237	2.64991	2.98932e-26	8.22477e-23	No	meth_hyper_RNA_up	CBL-interacting protein kinase 3	0	0	XP_010318313.1	0
Solyc09g059400	SL3.0ch09	54617240	54619240	+	192	365	6135	6295	34.47	49.356	14.886	1.05777e-11	9.41508	1.6217	2.25629e-17	3.50882e-14	No	meth_hyper_RNA_up	CCCH-type zinc fingerfamily protein with RNA-binding domain-containing protein	0	0	XP_019071232.1	0
Solyc09g059650	SL3.0ch09	55245581	55247581	-	145	571	4850	7944	20.251	37.908	17.657	2.18727e-22	4.4643	3.75064	1.45138e-14	1.52685e-11	Yes	meth_hyper_RNA_up	Vacuolar iron transporter family protein	0	0	XP_004230639.1	0
Solyc09g059675	SL3.0ch09	55303050	55305050	-	172	552	3719	6961	23.757	34.822	11.0652	9.64385e-10	2.61226	1.8709	9.65796e-06	0.000640902	No	meth_hyper_RNA_up	alpha/beta hydrolase family protein	0	0	XP_004247078.1	0
Solyc09g061930	SL3.0ch09	60939017	60941017	-	33	1855	7071	8012	1.748	46.881	45.1327	0	2.5952	2.45159	1.00501e-05	0.00065958	No	meth_hyper_RNA_up	Ovary receptor kinase 7	GO:0005515	protein binding	XP_004247106.2	AT3G24660.1
Solyc09g064480	SL3.0ch09	61986070	61988070	+	419	3665	399	2967	10.26	11.854	1.59428	0.0172028	2.4108	4.39143	0.000254033	0.0082828	No	meth_hyper_RNA_up	Xyloglucan galactosyltransferase KATAMARI1	0	0	XP_004247129.1	AT2G20370.1
Solyc09g064510	SL3.0ch09	62011057	62013057	+	6566	8229	8066	8223	44.38	49.518	5.13822	6.91064e-19	4.60354	5.44929	5.86138e-09	1.57631e-06	No	meth_hyper_RNA_up	heme oxygenase-like, multi-helical	0	0	XP_010326344.1	AT5G32470.1
Solyc09g065240	SL3.0ch09	63532874	63534874	-	6684	9406	7988	9727	41.541	45.092	3.5504	1.10236e-10	2.50255	5.21374	0.000612664	0.0164765	Yes	meth_hyper_RNA_up	Patatin	GO:0008152	metabolic process	XP_019071339.1	AT3G63200.1
Solyc09g075300	SL3.0ch09	67453213	67455213	+	15966	7562	19464	8434	67.86	69.768	1.90887	3.69816e-06	2.11484	4.83842	1.84706e-07	2.67473e-05	No	meth_hyper_RNA_up	Epoxide hydrolase, putative	GO:0003824	catalytic activity	XP_004247402.1	AT4G02340.1
Solyc09g075670	SL3.0ch09	67742455	67744455	-	4440	6916	5143	6410	39.098	44.517	5.4183	3.99868e-16	7.23567	1.24834	5.57928e-05	0.00255846	Yes	meth_hyper_RNA_up	Alpha/beta-Hydrolases superfamily protein	GO:0008152|GO:0016787	metabolic process | hydrolase activity	XP_004247378.1	AT3G48700.1
Solyc09g075680	SL3.0ch09	67744829	67746829	-	763	7006	822	6658	9.821	10.989	1.16822	0.0106727	7.64713	-2.12307	0.00249618	0.0472399	No	meth_hyper_RNA_up	Alpha/beta-Hydrolases superfamily protein	GO:0008152|GO:0016787	metabolic process | hydrolase activity	XP_004247377.1	AT2G03550.1
Solyc09g075730	SL3.0ch09	67772717	67774717	+	1830	1988	2266	2142	47.931	51.407	3.47568	0.00121927	2.92495	3.95555	1.45032e-08	3.10629e-06	No	meth_hyper_RNA_up	Leucine-rich repeat family protein / protein kinase family protein	GO:0005515	protein binding	XP_004247374.1	AT3G05990.1
Solyc09g082060	SL3.0ch09	68323514	68325514	+	2074	9801	2641	11323	17.465	18.913	1.44766	0.00193111	1.42852	7.46384	8.52629e-06	0.000583114	No	meth_hyper_RNA_up	Cysteine synthase	GO:0006535	cysteine biosynthetic process from serine	NP_001308271.1	AT4G14880.1
Solyc09g082230	SL3.0ch09	68470023	68472023	+	7077	8635	9541	9473	45.042	50.179	5.13681	9.47025e-21	2.51859	5.5791	4.42717e-05	0.00213988	No	meth_hyper_RNA_up	LOW QUALITY:N-acetyltransferase, putative	GO:0008080	N-acetyltransferase activity	XP_004247573.1	AT2G32030.1
Solyc09g089670	SL3.0ch09	69909919	69911919	+	8101	8139	8156	6651	49.883	55.082	5.19905	2.80417e-19	1.60143	5.05379	0.000144404	0.00530835	Yes	meth_hyper_RNA_up	HR-like lesion-inducing protein-like protein	0	0	XP_004247711.1	AT4G14420.1
Solyc09g090980	SL3.0ch09	70827652	70829652	-	4975	9134	5875	10121	35.261	36.728	1.46675	0.00530467	6.21395	5.81642	1.16202e-08	2.59769e-06	No	meth_hyper_RNA_up	Major allergen Mal d 1	GO:0006952|GO:0009607	defense response | response to biotic stimulus	NP_001275580.1	AT1G24020.1
Solyc10g005060	SL3.0ch10	56068	58068	-	92	3448	124	3137	2.599	3.803	1.20364	0.00360866	2.72135	1.51333	1.89005e-05	0.00109214	No	meth_hyper_RNA_up	Caffeic acid O-methyltransferase	GO:0046983	protein dimerization activity	NP_001306101.1	AT5G54160.1
Solyc10g007610	SL3.0ch10	1900118	1902118	+	11551	7881	12112	7875	59.443	60.599	1.1562	0.0114071	1.00779	4.84874	0.000675093	0.0177549	No	meth_hyper_RNA_up	Nucleotide/sugar transporter family protein	0	0	XP_004248226.1	AT3G14410.1
Solyc10g008350	SL3.0ch10	2471250	2473250	+	459	6860	668	7464	6.271	8.214	1.94311	4.31124e-06	2.94175	6.03707	0.000255174	0.00831244	No	meth_hyper_RNA_up	50S ribosomal protein L20, chloroplastic	0	0	XP_004248166.1	0
Solyc10g008880	SL3.0ch10	2913777	2915777	-	1377	5513	1151	3645	19.985	23.999	4.01368	3.2914e-07	2.01913	5.80322	5.09385e-07	5.9421e-05	No	meth_hyper_RNA_up	Zinc finger transcription factor 56	0	0	XP_004248127.1	AT1G28520.1
Solyc10g009120	SL3.0ch10	3119954	3121954	-	4704	9297	6979	10350	33.598	40.274	6.67593	6.63559e-33	1.36528	5.31979	0.00216565	0.0425609	Yes	meth_hyper_RNA_up	LOW QUALITY:DNA repair (Rad51) family protein	0	0	XP_004231085.1	0
Solyc10g011740	SL3.0ch10	3974153	3976153	-	3167	3087	4013	3213	50.64	55.536	4.89598	2.19498e-08	1.64282	7.27641	0.000191914	0.00660037	No	meth_hyper_RNA_up	Ubiquitin-conjugating enzyme E2, putative	0	0	XP_004248072.1	AT5G53300.1
Solyc10g011810	SL3.0ch10	4030468	4032468	-	4236	6128	4980	6568	40.872	43.124	2.2521	0.000574573	2.78168	3.76913	5.82327e-05	0.00264178	No	meth_hyper_RNA_up	Fatty acid/sphingolipid desaturase	GO:0006629	lipid metabolic process	XP_004248068.1	AT2G46210.1
Solyc10g011820	SL3.0ch10	4052534	4054534	+	3498	6096	5051	7019	36.46	41.848	5.38727	2.77291e-15	2.87245	2.35053	0.000407222	0.0119389	Yes	meth_hyper_RNA_up	Fatty acid/sphingolipid desaturase	GO:0006629|GO:0016021|GO:0016491	lipid metabolic process | integral component of membrane | oxidoreductase activity	XP_010326991.1	AT2G46210.1
Solyc10g012080	SL3.0ch10	4399512	4401512	-	5219	6326	5538	5368	45.206	50.779	5.57367	2.71157e-16	3.03502	5.7788	8.30631e-09	2.0632e-06	No	meth_hyper_RNA_up	PLAC8 family protein	0	0	XP_004248055.1	AT1G63830.2
Solyc10g017850	SL3.0ch10	6112547	6114547	+	9279	11260	11691	12721	45.177	47.89	2.71291	1.53666e-08	0.979553	5.20494	0.00108514	0.0250894	Yes	meth_hyper_RNA_up	Peroxisomal membrane protein 11-1	GO:0005779|GO:0016559	integral component of peroxisomal membrane | peroxisome fission	NP_001234463.1	AT1G01820.1
Solyc10g018350	SL3.0ch10	7440227	7442227	-	12334	6660	13872	7079	64.936	66.212	1.27534	0.00470195	1.38362	3.84272	0.00029302	0.00923414	Yes	meth_hyper_RNA_up	Vesicle-associated 1-1-like protein	GO:0005789	endoplasmic reticulum membrane	XP_004248557.1	AT2G45140.1
Solyc10g045350	SL3.0ch10	32723337	32725337	-	9622	5733	13135	6583	62.664	66.614	3.95063	5.15887e-14	1.24344	3.74559	0.00164788	0.0348857	No	meth_hyper_RNA_up	ecotropic viral integration site protein	0	0	XP_004248825.1	AT2G44360.1
Solyc10g045420	SL3.0ch10	33320743	33322743	+	7167	8671	9232	8677	45.252	51.55	6.29757	8.87117e-30	2.53753	5.51213	3.04656e-06	0.000251661	No	meth_hyper_RNA_up	O-fucosyltransferase family protein	0	0	XP_004248822.1	AT2G44500.1
Solyc10g045433	SL3.0ch10	33398966	33400966	+	3042	5653	3291	5372	34.986	37.989	3.00353	3.94906e-05	2.51604	2.0725	2.88225e-05	0.00152278	No	meth_hyper_RNA_up	DEAD-box ATP-dependent RNA helicase 32	0	0	XP_010325155.1	0
Solyc10g052880	SL3.0ch10	54036625	54038625	+	8286	5833	12463	8085	58.687	60.653	1.96623	0.000212511	6.30698	4.55287	1.40984e-10	6.63516e-08	Yes	meth_hyper_RNA_up	LOW QUALITY:Leucine-rich repeat receptor-like protein kinase family protein	GO:0005515	protein binding	XP_004248703.1	AT1G33590.1
Solyc10g054440	SL3.0ch10	55368444	55370444	-	2158	10845	2925	11758	16.596	19.921	3.32483	2.45985e-12	3.13624	7.2323	0.000122524	0.00462771	Yes	meth_hyper_RNA_up	arginine decarboxylase 1	GO:0006527|GO:0008295|GO:0008792	arginine catabolic process | spermidine biosynthetic process | arginine decarboxylase activity	NP_001234064.1	AT4G34710.1
Solyc10g054930	SL3.0ch10	56069809	56071809	+	2663	10941	3183	11830	19.575	21.202	1.6265	0.000511031	1.46747	4.76484	4.20137e-05	0.00205574	Yes	meth_hyper_RNA_up	magnesium transporter NIPA (DUF803)	GO:0015095|GO:0015693|GO:0016021	magnesium ion transmembrane transporter activity | magnesium ion transport | integral component of membrane	XP_010327417.1	AT2G21120.1
Solyc10g055200	SL3.0ch10	56429128	56431128	+	2365	8707	2734	9108	21.36	23.087	1.72713	0.00125209	11.9655	4.55926	3.37869e-10	1.35785e-07	No	meth_hyper_RNA_up	Dirigent protein	0	0	XP_004248663.1	AT2G21100.1
Solyc10g076780	SL3.0ch10	59836981	59838981	+	2864	8282	3628	8055	25.695	31.054	5.35835	1.48008e-18	5.96532	-1.04986	0.00221602	0.0432892	Yes	meth_hyper_RNA_up	LOW QUALITY:Alpha 1,4-glycosyltransferase family protein	0	0	XP_004249080.1	AT2G38150.1
Solyc10g078230	SL3.0ch10	60212320	60214320	-	4083	4748	4596	3595	46.235	56.11	9.87551	9.59707e-37	9.01119	-1.05002	0.00098419	0.0232821	No	meth_hyper_RNA_up	Cytochrome P450	GO:0016705|GO:0055114	oxidoreductase activity, acting on paired donors, with incorporation or reduction of molecular oxygen | oxidation-reduction process	XP_004249115.1	AT2G40890.1
Solyc10g078495	SL3.0ch10	60434272	60436272	-	10554	9260	11731	9644	53.265	54.882	1.6165	0.000763781	5.07164	-1.26775	0.000707962	0.0182701	Yes	meth_hyper_RNA_up	Aquaporin SIP1-1	0	0	XP_004249141.1	0
Solyc10g078600	SL3.0ch10	60502369	60504369	-	609	2186	491	999	21.789	32.953	11.1641	1.15141e-14	4.39155	3.89999	3.31387e-15	4.00022e-12	No	meth_hyper_RNA_up	Inorganic phosphate transporter 1-1	0	0	XP_010314629.1	AT1G19715.3
Solyc10g078910	SL3.0ch10	60693741	60695741	-	2324	7433	2900	8129	23.819	26.294	2.47552	3.92342e-05	2.32913	6.35187	1.68218e-08	3.5186e-06	No	meth_hyper_RNA_up	Protein trichome birefringence	0	0	XP_004249181.1	AT5G06700.1
Solyc10g079090	SL3.0ch10	60838292	60840292	+	2380	11524	3109	13889	17.117	18.29	1.17301	0.00471115	2.21482	7.18714	3.13053e-05	0.00162044	No	meth_hyper_RNA_up	Chaperone protein dnaJ, putative	0	0	XP_010312076.2	AT3G12170.1
Solyc10g079380	SL3.0ch10	61056705	61058705	+	2127	6947	3352	8072	23.441	29.342	5.90114	1.17367e-20	10.004	-0.0877645	0.00125152	0.0280479	No	meth_hyper_RNA_up	SolycHsfB3b	GO:0003700|GO:0005634|GO:0006355|GO:0043565	DNA-binding transcription factor activity | nucleus | regulation of transcription, DNA-templated | sequence-specific DNA binding	XP_004249739.1	AT2G41690.1
Solyc10g079390	SL3.0ch10	61062345	61064345	+	4909	7787	6726	9554	38.666	41.314	2.64877	5.56076e-06	7.80888	-0.985745	2.24275e-05	0.0012437	Yes	meth_hyper_RNA_up	LOW QUALITY:transmembrane protein	0	0	XP_010312402.1	AT3G57400.1
Solyc10g079860	SL3.0ch10	61459707	61461707	-	2043	4602	2065	4239	30.745	32.757	2.01206	0.00845841	8.5317	4.87018	1.07593e-06	0.000109329	Yes	meth_hyper_RNA_up	LEQB L.esculentum TomQ'b beta(1,3)glucanase	GO:0005975	carbohydrate metabolic process	NP_001234158.2	AT3G57270.1
Solyc10g080370	SL3.0ch10	61783108	61785108	-	9894	8072	13081	9873	55.071	56.988	1.9172	9.49656e-05	1.85728	5.18943	0.00011712	0.00446128	No	meth_hyper_RNA_up	LOW QUALITY:Transmembrane protein, putative	0	0	XP_025884866.1	0
Solyc10g080980	SL3.0ch10	62285559	62287559	+	6699	4747	8095	5395	58.527	60.007	1.48042	0.0105284	5.58093	1.78888	4.68147e-07	5.54177e-05	No	meth_hyper_RNA_up	WAT1-related protein	GO:0016021|GO:0022857	integral component of membrane | transmembrane transporter activity	XP_004249326.1	AT5G07050.1
Solyc10g081040	SL3.0ch10	62343411	62345411	+	4057	7906	4674	8700	33.913	34.948	1.03551	0.0428836	1.57359	8.23659	1.01332e-05	0.000661391	Yes	meth_hyper_RNA_up	arginine/serine-rich 45	0	0	XP_010326006.2	0
Solyc10g081570	SL3.0ch10	62737651	62739651	-	2857	7708	3272	6912	27.042	32.129	5.08671	3.71927e-15	2.56544	7.8234	5.82989e-05	0.00264178	Yes	meth_hyper_RNA_up	Marmande	0	0	XP_004249379.1	0
Solyc10g081950	SL3.0ch10	63001461	63003461	+	10831	6650	12227	7193	61.959	62.961	1.00217	0.0254258	7.78633	-0.890337	0.0001583	0.00569054	Yes	meth_hyper_RNA_up	Late embryogenesis abundant (LEA) hydroxyproline-rich glycoprotein family	0	0	XP_019071553.1	0
Solyc10g083290	SL3.0ch10	63240193	63242193	-	3512	10476	3227	8773	25.107	26.892	1.78443	0.000815659	10.1617	2.93644	6.59814e-06	0.000461844	Yes	meth_hyper_RNA_up	symbol=Lin6	GO:0004553|GO:0005975	hydrolase activity, hydrolyzing O-glycosyl compounds | carbohydrate metabolic process	NP_001233842.2	AT3G52600.1
Solyc10g083970	SL3.0ch10	63790630	63792630	-	5303	4623	5816	4541	53.425	56.155	2.72991	8.78923e-05	1.45325	7.29805	0.000163382	0.00585554	No	meth_hyper_RNA_up	S-adenosylmethionine synthase	GO:0004478|GO:0006556	methionine adenosyltransferase activity | S-adenosylmethionine biosynthetic process	XP_010312254.1	AT2G36880.1
Solyc10g084280	SL3.0ch10	64020199	64022199	+	4181	7221	4868	7355	36.669	39.827	3.15755	8.02803e-07	1.32944	5.6401	8.24428e-05	0.00341693	Yes	meth_hyper_RNA_up	SUN-like protein 29	GO:0005515	protein binding	XP_025883482.1	AT5G03040.1
Solyc10g084660	SL3.0ch10	64224911	64226911	+	15258	7304	18802	7680	67.627	70.999	3.37219	2.68703e-15	2.77779	3.13942	8.19512e-07	8.8025e-05	Yes	meth_hyper_RNA_up	Actin depolymerizing factor, putative	GO:0015629|GO:0030042	actin cytoskeleton | actin filament depolymerization	XP_004249528.1	AT5G59890.1
Solyc10g085000	SL3.0ch10	64467003	64469003	+	1770	3993	3284	5147	30.713	38.951	8.23832	4.33261e-23	1.49219	5.08361	0.00079988	0.0198544	No	meth_hyper_RNA_up	Kinase family protein	GO:0005515	protein binding	XP_004249553.1	AT5G59010.1
Solyc10g085030	SL3.0ch10	64480903	64482903	+	5472	7561	6735	7893	41.986	46.042	4.05611	2.82268e-11	3.19331	3.28406	3.94846e-05	0.00195337	No	meth_hyper_RNA_up	SOUL heme-binding family protein	0	0	XP_004249669.1	AT2G37970.1
Solyc10g085320	SL3.0ch10	64664665	64666665	+	2742	5849	3292	6353	31.917	34.132	2.21455	0.0011111	1.0126	4.5505	0.000793369	0.01975	No	meth_hyper_RNA_up	Trichome birefringence-like protein	0	0	XP_004249604.1	AT5G01620.3
Solyc10g086650	SL3.0ch10	65554182	65556182	-	7102	7610	7630	7480	48.274	50.496	2.22284	0.00011071	1.93247	3.80026	1.1391e-05	0.00072368	Yes	meth_hyper_RNA_up	LOW QUALITY:glyoxal oxidase-related protein	0	0	XP_004249644.1	AT3G53950.1
Solyc10g086700	SL3.0ch10	65589336	65591336	-	5041	8412	6653	10061	37.471	39.805	2.33376	3.40315e-05	1.43159	3.35805	0.00027656	0.00887176	No	meth_hyper_RNA_up	RING/FYVE/PHD zinc finger superfamily protein	GO:0008270	zinc ion binding	XP_004249673.1	AT5G05830.1
Solyc11g005070	SL3.0ch11	64442	66442	-	3757	12244	4505	13834	23.48	24.565	1.08535	0.0112211	3.92562	-0.735924	0.00141781	0.0309033	No	meth_hyper_RNA_up	amino acid transporter 3	0	0	NP_001233979.1	AT1G77380.1
Solyc11g005150	SL3.0ch11	136522	138522	+	3880	10680	5494	11333	26.648	32.65	6.00156	4.6311e-30	2.28502	6.28298	0.000745537	0.0188322	No	meth_hyper_RNA_up	entensin X55687	GO:0005515	protein binding	XP_004249854.1	AT1G12040.1
Solyc11g005720	SL3.0ch11	573031	575031	-	3070	7234	2887	6186	29.794	31.82	2.02543	0.00164644	1.40659	5.21764	7.90033e-05	0.00330502	No	meth_hyper_RNA_up	LOW QUALITY:VQ motif-containing family protein	0	0	XP_004249890.1	AT3G18690.1
Solyc11g005860	SL3.0ch11	685086	687086	+	8151	10517	9310	11265	43.663	45.249	1.58614	0.00116833	5.49774	1.09171	3.01331e-05	0.00158267	No	meth_hyper_RNA_up	Cysteine desulfurase	GO:0003824	catalytic activity	XP_004250452.1	0
Solyc11g006030	SL3.0ch11	841729	843729	-	10144	9507	12138	10137	51.621	54.492	2.8708	7.32142e-09	9.98405	0.839401	0.00024305	0.00799763	No	meth_hyper_RNA_up	U-box domain-containing family protein	GO:0005488	binding	XP_004250456.2	AT5G37490.1
Solyc11g007660	SL3.0ch11	1880702	1882702	+	5734	6360	6133	6038	47.412	50.39	2.97833	4.04583e-06	1.7547	5.4483	0.000976513	0.0231311	Yes	meth_hyper_RNA_up	type-1 restriction enzyme mjaxp r protein (DUF668)	0	0	XP_019066628.1	AT5G04550.1
Solyc11g007940	SL3.0ch11	2166231	2168231	+	7333	7709	8892	8384	48.75	51.47	2.72008	1.35124e-06	1.86535	3.58342	3.91753e-06	0.000308639	No	meth_hyper_RNA_up	RNA-binding protein Nova-1	GO:0003723	RNA binding	XP_004250025.1	AT5G04430.2
Solyc11g010100	SL3.0ch11	3220418	3222418	+	4732	5809	5266	5860	44.891	47.331	2.4392	0.000261627	1.05537	5.79174	0.000270582	0.00874269	No	meth_hyper_RNA_up	Ras-related protein Rab11D	GO:0005525|GO:0007264	GTP binding | small GTPase mediated signal transduction	XP_004250110.1	AT5G65270.1
Solyc11g010500	SL3.0ch11	3564096	3566096	-	3387	5775	4052	5079	36.968	44.376	7.40839	1.57478e-23	2.48234	8.72581	2.66414e-09	8.00766e-07	Yes	meth_hyper_RNA_up	Mitochondrial carrier protein	GO:0006839|GO:0031966	mitochondrial transport | mitochondrial membrane	XP_004250140.1	AT2G22500.1
Solyc11g012070	SL3.0ch11	5014187	5016187	-	220	3382	355	3291	6.108	9.737	3.62898	1.78077e-08	1.14193	4.18713	0.00193166	0.0392342	No	meth_hyper_RNA_up	Acyl-protein thioesterase, putative	GO:0016787	hydrolase activity	XP_004250250.1	AT4G22300.1
Solyc11g012780	SL3.0ch11	5548952	5550952	+	1789	4785	2544	6301	27.213	28.762	1.54875	0.0196245	1.47247	5.02499	1.38648e-05	0.00084917	No	meth_hyper_RNA_up	Calcium-dependent lipid-binding (CaLB domain) family protein	GO:0005515	protein binding	XP_004250303.1	AT5G47710.1
Solyc11g012910	SL3.0ch11	5697114	5699114	+	2716	9145	2629	8128	22.899	24.44	1.54132	0.0042982	1.10537	5.12595	0.000433858	0.0125103	Yes	meth_hyper_RNA_up	Gamma-glutamylcyclotransferase	GO:0003839|GO:0006751	gamma-glutamylcyclotransferase activity | glutathione catabolic process	XP_004250319.1	AT1G44790.1
Solyc11g016930	SL3.0ch11	7596579	7598579	+	3546	7087	3431	6181	33.349	35.695	2.34596	0.000377078	5.39461	0.63058	0.000526586	0.0146575	No	meth_hyper_RNA_up	Leucine-rich repeat receptor-like protein kinase	GO:0005515	protein binding	XP_004233342.1	AT3G28450.1
Solyc11g017373	SL3.0ch11	8279971	8281971	-	2855	6105	2471	4937	31.864	33.356	1.49199	0.0238744	8.69312	-0.153897	5.42079e-12	3.72867e-09	No	meth_hyper_RNA_up	Serine/threonine protein phosphatase 7 long form isogeny	0	0	XP_025887697.1	0
Solyc11g018775	SL3.0ch11	9472795	9474795	+	6832	6417	9457	7513	51.566	55.728	4.1616	1.65348e-12	8.64725	1.06492	3.5661e-07	4.5981e-05	No	meth_hyper_RNA_up	Peroxidase	GO:0004601|GO:0055114	peroxidase activity | oxidation-reduction process	XP_025884117.1	0
Solyc11g018777	SL3.0ch11	9486878	9488878	+	3191	6326	3057	5607	33.529	35.284	1.75446	0.00783199	10.2786	2.56996	1.62769e-09	5.01891e-07	Yes	meth_hyper_RNA_up	Peroxidase	GO:0004601|GO:0055114	peroxidase activity | oxidation-reduction process	XP_025884099.1	0
Solyc11g044470	SL3.0ch11	32858145	32860145	-	9165	8491	11574	9753	51.909	54.269	2.36054	3.99262e-06	1.93882	5.21799	2.60954e-06	0.000222763	No	meth_hyper_RNA_up	RNA binding protein, putative	GO:0003676	nucleic acid binding	XP_004250742.1	AT1G33470.1
Solyc11g042940	SL3.0ch11	34194449	34196449	-	8968	8022	11583	9544	52.784	54.826	2.04159	6.58009e-05	1.65118	3.8756	0.00094928	0.0225757	No	meth_hyper_RNA_up	Xylulose kinase, putative	GO:0005975|GO:0016773	carbohydrate metabolic process | phosphotransferase activity, alcohol group as acceptor	XP_004250720.1	AT2G21370.1
Solyc11g042560	SL3.0ch11	36291542	36293542	+	4868	7667	6651	8808	38.835	43.023	4.18822	3.66758e-12	3.13068	2.68847	0.00168433	0.0354801	No	meth_hyper_RNA_up	Ethylene-responsive transcription factor ERF021 family	GO:0003700|GO:0006355	DNA-binding transcription factor activity | regulation of transcription, DNA-templated	XP_004250806.1	AT1G33760.1
Solyc11g061720	SL3.0ch11	48552341	48554341	-	1674	7997	2503	10395	17.309	19.406	2.09663	5.43927e-05	3.93413	1.9126	0.00012119	0.00458216	No	meth_hyper_RNA_up	Kinase family protein	GO:0005524	ATP binding	XP_004250864.1	AT1G51170.1
Solyc11g062440	SL3.0ch11	49802478	49804478	-	2038	9827	2745	9410	17.177	22.583	5.40673	7.3847e-25	2.56214	4.80129	0.000168336	0.00599704	No	meth_hyper_RNA_up	L-ascorbate oxidase	GO:0055114	oxidation-reduction process	XP_004250887.1	AT5G21105.1
Solyc11g065760	SL3.0ch11	51657485	51659485	-	4291	8825	4890	9402	32.716	34.215	1.49918	0.00542592	3.35631	2.92103	0.000119484	0.00453683	Yes	meth_hyper_RNA_up	TK1-like deoxyribonucleoside kinase	GO:0004797|GO:0005524	thymidine kinase activity | ATP binding	NP_001234713.1	AT3G07800.1
Solyc11g068440	SL3.0ch11	53462356	53464356	+	6204	9567	7898	10781	39.338	42.283	2.94475	4.84594e-08	1.78935	7.55633	0.000240969	0.00793644	No	meth_hyper_RNA_up	Glucan endo-1,3-beta-glucosidase, putative	GO:0005975	carbohydrate metabolic process	XP_010313365.1	AT2G27500.1
Solyc11g069960	SL3.0ch11	54857717	54859717	-	1126	5454	1424	6016	17.112	19.14	2.02732	0.00140782	8.23667	1.76063	2.0297e-05	0.00115051	No	meth_hyper_RNA_up	RLK-1	GO:0005515	protein binding	XP_004251175.1	AT1G68400.1
Solyc11g070140	SL3.0ch11	54952151	54954151	+	1666	4113	1697	3828	28.829	30.715	1.88642	0.0163713	2.46306	0.962007	0.000284298	0.00903088	No	meth_hyper_RNA_up	Protein kinase	GO:0005524	ATP binding	XP_010313448.1	AT3G48750.1
Solyc11g071750	SL3.0ch11	55434565	55436565	-	544	3558	807	3283	13.262	19.731	6.46923	1.13221e-14	8.2666	0.987776	1.80362e-06	0.000168	No	meth_hyper_RNA_up	Calmodulin-like protein	GO:0005509	calcium ion binding	NP_001234570.1	AT5G42380.1
Solyc11g072040	SL3.0ch11	55623580	55625580	-	1281	3440	1415	3401	27.134	29.381	2.24715	0.00894546	4.45772	3.13198	1.79561e-11	1.03589e-08	No	meth_hyper_RNA_up	GDSL esterase/lipase	GO:0016788	hydrolase activity, acting on ester bonds	XP_004251233.1	AT4G10950.1
Solyc11g072240	SL3.0ch11	55751867	55753867	-	3709	5535	3916	5390	40.123	42.08	1.95706	0.00442184	1.29751	7.24393	0.000220861	0.00739676	Yes	meth_hyper_RNA_up	Calmodulin 4	GO:0005509	calcium ion binding	XP_004251248.1	AT3G43810.1
Solyc12g005340	SL3.0ch12	214276	216276	-	2188	5709	1947	4155	27.707	31.908	4.20085	1.07219e-07	1.70289	8.01829	0.00222361	0.043407	No	meth_hyper_RNA_up	GRAS family transcription factor	0	0	XP_010313625.1	AT5G48150.1
Solyc12g005450	SL3.0ch12	268042	270042	+	3022	10333	2796	8901	22.628	23.904	1.27534	0.0100972	2.63724	2.575	0.000373202	0.0111239	No	meth_hyper_RNA_up	Kinase family protein	GO:0004672|GO:0006468	protein kinase activity | protein phosphorylation	XP_004251495.1	AT4G10390.1
Solyc12g005910	SL3.0ch12	539680	541680	+	2718	7405	3232	8012	26.85	28.744	1.89447	0.00150123	1.62163	5.52747	0.000593628	0.0160612	No	meth_hyper_RNA_up	B-cell receptor-associated 31-like protein	GO:0005783|GO:0006886|GO:0016021	endoplasmic reticulum | intracellular protein transport | integral component of membrane	XP_004251523.1	AT5G42570.1
Solyc12g005920	SL3.0ch12	545671	547671	+	181	2846	309	3561	5.98	7.984	2.00498	0.000960004	7.32841	-2.15009	0.000678356	0.0177754	No	meth_hyper_RNA_up	Fimbrin-like family protein	GO:0005515	protein binding	XP_004251524.1	AT5G35700.1
Solyc12g006470	SL3.0ch12	954591	956591	+	6719	11200	8239	12936	37.497	38.909	1.41258	0.00281975	4.57614	4.26807	0.000403115	0.0118672	No	meth_hyper_RNA_up	viroid RNA-binding protein	GO:0008483|GO:0030170	transaminase activity | pyridoxal phosphate binding	NP_001234340.2	AT3G22200.2
Solyc12g007110	SL3.0ch12	1547548	1549548	+	4983	10778	5743	11359	31.616	33.581	1.96485	0.000130044	1.59143	5.88181	1.34984e-06	0.000131915	No	meth_hyper_RNA_up	Receptor-like kinase	GO:0005524	ATP binding	XP_004251608.1	AT3G24550.1
Solyc12g008980	SL3.0ch12	2283176	2285176	+	6460	11345	7775	12640	36.282	38.085	1.8028	0.000236688	5.28012	2.285	3.1999e-05	0.00164682	Yes	meth_hyper_RNA_up	B-LYC2	GO:0016491|GO:0055114	oxidoreductase activity | oxidation-reduction process	NP_001234337.2	AT5G57030.1
Solyc12g009060	SL3.0ch12	2348231	2350231	+	7084	9566	10625	11558	42.547	47.897	5.35049	8.91252e-25	1.11603	7.45156	0.00164149	0.0348236	No	meth_hyper_RNA_up	SNF7 family protein	GO:0007034	vacuolar transport	NP_001334249.1	AT2G06530.1
Solyc12g010430	SL3.0ch12	3464457	3466457	-	8764	5593	9671	5369	61.043	64.302	3.25847	1.32992e-08	1.10181	4.49949	0.00117295	0.0266375	No	meth_hyper_RNA_up	LOW QUALITY:NHL domain protein	0	0	XP_010313842.1	0
Solyc12g010980	SL3.0ch12	3843916	3845916	-	2201	9265	2732	10761	19.196	20.248	1.05165	0.0208613	7.63225	1.20968	2.643e-05	0.00142802	No	meth_hyper_RNA_up	HXXXD-type acyl-transferase family protein	GO:0016747	transferase activity, transferring acyl groups other than amino-acyl groups	XP_004251812.1	AT3G26040.1
Solyc12g013580	SL3.0ch12	4415441	4417441	+	8940	6893	12963	8163	56.464	61.36	4.89606	1.67423e-20	1.9218	5.96191	1.60986e-06	0.00015355	Yes	meth_hyper_RNA_up	Peptidyl-prolyl cis-trans isomerase, putative	GO:0003755|GO:0006457	peptidyl-prolyl cis-trans isomerase activity | protein folding	XP_004251848.1	AT3G15520.1
Solyc12g014010	SL3.0ch12	4842610	4844610	+	4648	7057	6032	7587	39.71	44.291	4.58154	5.14306e-13	3.5736	1.03302	0.00265274	0.0496252	Yes	meth_hyper_RNA_up	Glycosyltransferase	GO:0008152|GO:0016758	metabolic process | transferase activity, transferring hexosyl groups	XP_004251871.1	AT3G21750.1
Solyc12g014490	SL3.0ch12	5457769	5459769	+	2522	9122	3122	10595	21.659	22.76	1.10086	0.0200987	1.35029	4.60928	0.000351493	0.0106454	No	meth_hyper_RNA_up	Microtubule associated family protein	GO:0000226|GO:0000910|GO:0008017	microtubule cytoskeleton organization | cytokinesis | microtubule binding	XP_025884396.1	AT5G55230.2
Solyc12g015690	SL3.0ch12	5669176	5671176	+	8567	8231	10302	9017	51	53.326	2.32562	1.11968e-05	2.46464	5.02725	2.23962e-05	0.0012437	Yes	meth_hyper_RNA_up	Fasciclin-like arabinogalactan protein	0	0	XP_004244059.1	AT5G55730.1
Solyc12g015850	SL3.0ch12	5827804	5829804	+	5173	5892	5109	4877	46.751	51.162	4.41061	3.37339e-10	3.85019	2.62709	8.91367e-07	9.40484e-05	Yes	meth_hyper_RNA_up	LOW QUALITY:Nucleotide/sugar transporter family protein	0	0	XP_004251941.1	AT5G55950.1
Solyc12g019700	SL3.0ch12	11159367	11161367	-	3548	3564	4585	3213	49.888	58.797	8.90961	1.05167e-26	3.72616	5.21261	1.81284e-09	5.54201e-07	Yes	meth_hyper_RNA_up	Protein Ycf2	0	0	XP_010324366.1	0
Solyc12g035223	SL3.0ch12	39424798	39426798	+	2364	4970	5306	6994	32.233	43.138	10.9048	6.0623e-51	9.46702	0.668115	6.90852e-15	7.72199e-12	No	meth_hyper_RNA_up	Cytochrome b561 and DOMON domain-containing protein At5g35735	0	0	XP_004237881.1	0
Solyc12g035225	SL3.0ch12	39428378	39430378	+	388	1848	443	1609	17.352	21.589	4.23628	0.000393278	11.7326	2.6285	9.26912e-32	4.14423e-28	No	meth_hyper_RNA_up	BED zinc finger,hAT family dimerization domain, putative	GO:0046983	protein dimerization activity	XP_010314162.1	0
Solyc12g036650	SL3.0ch12	47300520	47302520	+	7722	7992	10394	9268	49.141	52.863	3.7225	8.67104e-12	1.24827	3.84154	0.00153422	0.0328992	No	meth_hyper_RNA_up	translocase subunit seca	0	0	XP_004252237.1	AT1G68490.1
Solyc12g036820	SL3.0ch12	48401016	48403016	-	6408	6424	6905	6252	49.938	52.482	2.54391	4.01434e-05	4.51485	-0.748693	0.000554076	0.0152565	No	meth_hyper_RNA_up	LOW QUALITY:transmembrane protein	0	0	XP_004236120.1	0
Solyc12g038510	SL3.0ch12	51396464	51398464	-	2137	6608	2554	6913	24.437	26.978	2.5411	8.06244e-05	2.17144	2.35436	0.00263367	0.0493051	No	meth_hyper_RNA_up	MADS-box transcription factor	GO:0003700|GO:0005634|GO:0006355	DNA-binding transcription factor activity | nucleus | regulation of transcription, DNA-templated	NP_001275579.1	AT2G03710.1
Solyc12g044410	SL3.0ch12	60283517	60285517	+	6955	9141	9110	11025	43.209	45.245	2.03511	9.53199e-05	1.62124	5.08592	0.000680548	0.0178196	No	meth_hyper_RNA_up	Homeobox leucine-zipper protein	GO:0008289	lipid binding	XP_004252354.1	AT1G52150.2
Solyc12g044950	SL3.0ch12	61237892	61239892	-	4556	9376	4738	9185	32.702	34.03	1.32833	0.0109686	5.66445	1.31429	0.000438091	0.0126063	No	meth_hyper_RNA_up	lipid desaturase	GO:0016717|GO:0055114	oxidoreductase activity, acting on paired donors, with oxidation of a pair of donors resulting in the reduction of molecular oxygen to two molecules of water | oxidation-reduction process	NP_001292750.1	AT3G12120.1
Solyc12g049420	SL3.0ch12	61938248	61940248	-	1936	2783	2856	3395	41.026	45.689	4.66305	1.43527e-06	1.62984	5.13261	4.69323e-05	0.00222931	No	meth_hyper_RNA_up	25. vesicle transport protein	GO:0016021|GO:0016192	integral component of membrane | vesicle-mediated transport	XP_010314329.1	AT1G11890.1
Solyc12g055830	SL3.0ch12	62781668	62783668	-	8967	8925	10054	9192	50.117	52.239	2.12206	4.22834e-05	0.894827	7.76679	0.00162047	0.034504	Yes	meth_hyper_RNA_up	Soluble inorganic pyrophosphatase	GO:0000287|GO:0004427|GO:0005737|GO:0006796	magnesium ion binding | inorganic diphosphatase activity | cytoplasm | phosphate-containing compound metabolic process	XP_004252616.1	AT1G01050.1
Solyc12g055930	SL3.0ch12	62874997	62876997	-	11793	6755	14546	7611	63.581	65.65	2.0687	1.45681e-05	1.43465	5.35808	0.000382911	0.011366	Yes	meth_hyper_RNA_up	UDP-glucose 4-epimerase	GO:0003978|GO:0006012	UDP-glucose 4-epimerase activity | galactose metabolic process	XP_004252613.1	AT4G10960.1
Solyc12g056110	SL3.0ch12	63025628	63027628	+	5530	8043	6280	7737	40.743	44.803	4.06009	2.42739e-11	1.0329	5.67176	0.000930872	0.0222861	Yes	meth_hyper_RNA_up	V-type proton ATPase subunit E	GO:0015991|GO:0033178|GO:0046961	proton-transporting two-sector ATPase complex, catalytic domain | proton-transporting ATPase activity, rotational mechanism	XP_004252601.1	AT4G11150.1
Solyc12g056360	SL3.0ch12	63260564	63262564	+	2931	5605	3731	5148	34.337	42.02	7.68357	1.58669e-24	4.21478	2.65067	0.00174188	0.0364136	Yes	meth_hyper_RNA_up	Thaumatin-like protein	0	0	XP_010314488.1	AT4G11650.1
Solyc12g057060	SL3.0ch12	64078103	64080103	-	1057	9090	1056	8200	10.417	11.409	0.991944	0.0151642	2.3001	2.97144	0.000175894	0.00619754	No	meth_hyper_RNA_up	Glycosyltransferase	GO:0008152|GO:0016758	metabolic process | transferase activity, transferring hexosyl groups	XP_004252533.1	AT1G22360.1
Solyc12g057150	SL3.0ch12	64172442	64174442	-	1916	8024	2067	7881	19.276	20.778	1.50239	0.00521836	3.39986	7.45833	1.24429e-07	1.91609e-05	Yes	meth_hyper_RNA_up	transmembrane protein	0	0	0	0
Solyc12g057160	SL3.0ch12	64172013	64174013	+	1935	9961	2084	9762	16.266	17.592	1.32646	0.0042292	3.26016	7.20078	7.2349e-10	2.53287e-07	Yes	meth_hyper_RNA_up	Arabinogalactan protein	0	0	XP_004252525.1	0
Solyc12g087790	SL3.0ch12	64276372	64278372	-	2889	7537	3336	7390	27.71	31.102	3.39242	9.58012e-08	2.61981	7.83319	6.5505e-08	1.13188e-05	Yes	meth_hyper_RNA_up	arginine/serine-rich zinc knuckle-containing protein 33	0	0	XP_004250523.1	0
Solyc12g088360	SL3.0ch12	64751569	64753569	+	3997	5257	5190	6376	43.192	44.873	1.68077	0.00934058	3.1623	6.12552	1.64531e-05	0.000977869	No	meth_hyper_RNA_up	U-box domain-containing protein	GO:0005515	protein binding	XP_004252739.1	AT3G01400.1
Solyc12g094500	SL3.0ch12	65705882	65707882	+	7738	6845	8363	6263	53.062	57.179	4.11721	4.00576e-12	1.70533	4.1285	4.29343e-06	0.000329544	Yes	meth_hyper_RNA_up	Alcohol dehydrogenase, putative	GO:0055114	oxidation-reduction process	XP_004253128.1	AT5G42250.1
Solyc12g096710	SL3.0ch12	66497420	66499420	+	4838	6375	5956	7348	43.146	44.768	1.62214	0.00674209	2.50031	4.82509	0.00132735	0.0292885	Yes	meth_hyper_RNA_up	Receptor-like kinase	GO:0005515	protein binding	XP_025884309.1	AT5G48380.1
Solyc12g098440	SL3.0ch12	66918688	66920688	+	715	3681	940	4195	16.265	18.306	2.04096	0.00574591	0.90902	5.45579	0.00164831	0.0348857	No	meth_hyper_RNA_up	RPM1-interacting protein 4	0	0	XP_004252989.1	AT3G25070.1
Solyc12g098640	SL3.0ch12	67067163	67069163	-	3839	10040	4894	10985	27.66	30.821	3.16009	4.17942e-09	1.19944	5.8248	0.001437	0.0311543	No	meth_hyper_RNA_up	Cycloeucalenol cycloisomerase	0	0	XP_025884240.1	AT5G50375.2
Solyc12g098660	SL3.0ch12	67066499	67068499	+	2972	9644	4041	11430	23.557	26.12	2.56245	1.01424e-06	1.7869	1.66687	0.000293996	0.00924858	No	meth_hyper_RNA_up	alpha/beta-Hydrolases superfamily protein	GO:0005094|GO:0005737	Rho GDP-dissociation inhibitor activity | cytoplasm	XP_004252974.1	AT5G19850.1
Solyc12g099160	SL3.0ch12	67389883	67391883	+	8070	6251	9518	6713	56.351	58.641	2.29006	5.06753e-05	1.81842	5.24012	2.10732e-05	0.001187	No	meth_hyper_RNA_up	serine carboxypeptidase family protein	GO:0004185|GO:0006508	serine-type carboxypeptidase activity | proteolysis	NP_001334360.1	AT3G17180.1
Solyc12g099430	SL3.0ch12	67562885	67564885	+	1061	5328	1416	6183	16.607	18.634	2.02736	0.00132294	1.05622	7.70953	0.00203329	0.0407205	No	meth_hyper_RNA_up	Epoxide hydrolase	GO:0003824	catalytic activity	XP_004252913.1	AT4G02340.1
Solyc01g005400	SL3.0ch01	277103	279103	+	2181	6986	1875	6422	23.792	22.599	-1.19333	0.0334321	-2.79044	2.05404	0.00142876	0.0310636	Yes	meth_hypo_RNA_down	Caleosin-related family protein	0	0	XP_004228703.1	AT1G70670.1
Solyc01g006460	SL3.0ch01	1067132	1069132	-	4082	10058	3122	10246	28.868	23.354	-5.51418	1.90647e-24	-7.97227	-1.07086	3.99801e-05	0.00197515	No	meth_hypo_RNA_down	Non-structural maintenance of chromosome element 4	GO:0005634|GO:0006281|GO:0030915	nucleus | DNA repair | Smc5-Smc6 complex	XP_025885012.1	AT1G51130.1
Solyc01g067570	SL3.0ch01	76190800	76192800	+	2143	6395	2397	8179	25.1	22.665	-2.43503	8.13767e-05	-1.40866	4.47999	3.17334e-05	0.00163786	No	meth_hypo_RNA_down	Adaptin family protein	0	0	XP_010321110.1	0
Solyc01g080030	SL3.0ch01	79011260	79013260	-	1765	5135	1791	5658	25.58	24.043	-1.53621	0.018478	-6.72043	-2.23906	0.000722373	0.018535	No	meth_hypo_RNA_down	NADP-dependent alkenal double bond reductase	0	0	XP_004241896.1	AT5G16990.1
Solyc01g090710	SL3.0ch01	84222861	84224861	+	8199	19321	8380	20932	29.793	28.589	-1.2039	0.00118405	-3.67128	-0.593535	0.000333373	0.0102441	No	meth_hypo_RNA_down	cytosolic malate dehydrogenase	GO:0016616|GO:0055114	oxidoreductase activity, acting on the CH-OH group of donors, NAD or NADP as acceptor | oxidation-reduction process	NP_001234152.1	AT5G43330.1
Solyc01g091100	SL3.0ch01	84691079	84693079	-	2295	9963	2529	11806	18.722	17.642	-1.08033	0.0134159	-5.05285	-2.16539	0.000168541	0.00599838	No	meth_hypo_RNA_down	LOW QUALITY:Plant invertase/pectin methylesterase inhibitor	GO:0004857	enzyme inhibitor activity	XP_004231160.1	AT4G25260.1
Solyc01g095690	SL3.0ch01	86752465	86754465	+	1240	2087	660	1571	37.271	29.583	-7.68767	4.90122e-09	-2.98457	1.43785	0.00259753	0.0487196	No	meth_hypo_RNA_down	Pentatricopeptide repeat-containing protein, putative	GO:0008270	zinc ion binding	XP_004231209.1	AT4G01030.1
Solyc01g095930	SL3.0ch01	86940743	86942743	+	261	3132	118	4548	7.692	2.529	-5.16337	5.45561e-26	-1.83841	5.62942	3.6507e-05	0.00182882	No	meth_hypo_RNA_down	O-acyltransferase WSD1-like protein	GO:0004144|GO:0045017	diacylglycerol O-acyltransferase activity | glycerolipid biosynthetic process	XP_025887948.1	AT5G53390.1
Solyc01g098400	SL3.0ch01	88799257	88801257	-	7669	8128	9229	10320	48.547	47.21	-1.33762	0.00763958	-2.49931	4.29378	6.08786e-05	0.00272529	Yes	meth_hypo_RNA_down	Histidine-containing phosphotransfer protein, putative	GO:0000160|GO:0004871	phosphorelay signal transduction system | obsolete signal transducer activity	XP_004230155.1	AT3G21510.1
Solyc01g100690	SL3.0ch01	90536324	90538324	+	2881	8946	2626	8837	24.36	22.908	-1.45103	0.00594634	-1.49662	5.67272	0.000545808	0.0150986	No	meth_hypo_RNA_down	Transmembrane protein, putative	0	0	XP_010313636.1	0
Solyc01g107800	SL3.0ch01	95113206	95115206	-	1415	7381	1488	9089	16.087	14.068	-2.0186	8.54365e-05	-1.2359	4.29875	0.00095215	0.0225989	No	meth_hypo_RNA_down	glucuronoxylan 4-O-methyltransferase-like protein (DUF579)	GO:0045492	xylan biosynthetic process	XP_004230754.1	AT5G67210.1
Solyc01g109230	SL3.0ch01	96152977	96154977	+	943	5386	815	5549	14.9	12.806	-2.09326	0.000533493	-2.61898	1.25868	0.00144244	0.0312307	No	meth_hypo_RNA_down	Cysteine/Histidine-rich C1 domain family protein	GO:0035556	intracellular signal transduction	XP_004230849.1	AT2G16050.1
Solyc01g109800	SL3.0ch01	96575044	96577044	+	7900	6579	9302	8233	54.562	53.048	-1.51359	0.00440451	-2.32435	3.82225	0.000374002	0.0111348	No	meth_hypo_RNA_down	LOW QUALITY:Transmembrane protein, putative	0	0	XP_010315310.1	AT2G21560.1
Solyc02g036370	SL3.0ch02	31085374	31087374	-	2586	10604	2730	12402	19.606	18.041	-1.56452	0.000604686	-1.06853	4.70401	0.00145691	0.0315059	No	meth_hypo_RNA_down	Myb family transcription factor	GO:0003677	DNA binding	XP_004231624.1	AT5G17300.1
Solyc02g069810	SL3.0ch02	40212323	40214323	-	16	165	0	90	8.84	0	-8.83978	0.00127137	-2.01003	2.63556	0.000839861	0.0205895	Yes	meth_hypo_RNA_down	Bromo-adjacent-like (BAH) domain protein	GO:0003682	chromatin binding	XP_010316964.1	AT3G15605.4
Solyc02g069935	SL3.0ch02	40281942	40283942	-	281	3080	219	3287	8.361	6.246	-2.11417	0.000619523	-2.21534	1.04376	5.22507e-05	0.00242715	No	meth_hypo_RNA_down	RING/U-box superfamily protein	0	0	XP_025884810.1	0
Solyc02g072340	SL3.0ch02	42173195	42175195	-	1290	3581	649	2223	26.483	22.597	-3.88578	0.000124701	-5.77149	-2.18759	0.000151788	0.00548398	No	meth_hypo_RNA_down	Subtilisin-like protease	0	0	XP_019067824.1	AT5G67360.1
Solyc02g072350	SL3.0ch02	42174619	42176619	-	2278	5204	1469	5012	30.446	22.666	-7.78015	2.67192e-24	-5.38275	-2.46404	6.1245e-05	0.00273826	No	meth_hypo_RNA_down	Subtilisin-like protease	GO:0004252|GO:0006508	serine-type endopeptidase activity | proteolysis	XP_019070598.1	AT1G04110.1
Solyc02g075610	SL3.0ch02	42336124	42338124	+	5208	7836	3506	5615	39.926	38.439	-1.48764	0.014921	-1.18655	6.40498	5.98914e-06	0.000426732	No	meth_hypo_RNA_down	Golgin candidate 6	GO:0000139|GO:0005737|GO:0006886|GO:0048280	Golgi membrane | cytoplasm | intracellular protein transport | vesicle fusion with Golgi apparatus	XP_010316823.1	AT3G27530.1
Solyc02g075615	SL3.0ch02	42340043	42342043	+	501	5264	424	5108	8.69	7.664	-1.02588	0.0267564	-1.19298	4.60628	0.000147818	0.0054061	Yes	meth_hypo_RNA_down	LOW QUALITY:Golgin candidate 6	GO:0005737|GO:0006886|GO:0008565|GO:0016020	cytoplasm | intracellular protein transport | obsolete protein transporter activity | membrane	XP_010316822.1	0
Solyc02g076680	SL3.0ch02	42395710	42397710	-	1152	5213	1113	5812	18.099	16.072	-2.02678	0.00140318	-1.90586	3.60372	4.782e-05	0.0022565	No	meth_hypo_RNA_down	DUF688 family protein	0	0	XP_025885154.1	AT2G30990.1
Solyc02g081300	SL3.0ch02	45875277	45877277	-	2160	3352	1736	3121	39.187	35.742	-3.445	0.000263658	-1.56816	3.12197	8.27045e-05	0.00342381	Yes	meth_hypo_RNA_down	Sucrose synthase	GO:0005985|GO:0016157	sucrose metabolic process | sucrose synthase activity	XP_004232672.1	AT1G73370.1
Solyc02g085240	SL3.0ch02	48843359	48845359	+	1419	2837	1365	3536	33.341	27.851	-5.48971	2.24366e-08	-2.17123	2.16466	8.35785e-07	8.92369e-05	Yes	meth_hypo_RNA_down	AP-1 complex subunit sigma-like protein	GO:0008565|GO:0030123	obsolete protein transporter activity | AP-3 adaptor complex	XP_004232409.1	AT3G50860.1
Solyc02g085245	SL3.0ch02	48845657	48847657	+	41	592	5	489	6.477	1.012	-5.46495	1.42575e-06	-3.36098	-0.674496	0.00183727	0.0379058	No	meth_hypo_RNA_down	Histone deacetylase	0	0	XP_010326927.1	0
Solyc02g085315	SL3.0ch02	48884432	48886432	-	1337	1122	1264	1201	54.372	51.278	-3.09381	0.0168445	-1.23059	5.40971	0.00110017	0.0253648	Yes	meth_hypo_RNA_down	Sec14p-like phosphatidylinositol transfer family protein	0	0	XP_025885305.1	0
Solyc02g086990	SL3.0ch02	50187796	50189796	-	4708	5474	5019	6368	46.238	44.077	-2.16188	0.00107245	-2.26083	3.85458	7.12087e-07	7.8369e-05	No	meth_hypo_RNA_down	Cyclic nucleotide-gated channel	GO:0005249|GO:0006813|GO:0016020	voltage-gated potassium channel activity | potassium ion transport | membrane	XP_004232288.1	AT5G14870.1
Solyc02g091710	SL3.0ch02	53592772	53594772	+	795	6243	623	6006	11.296	9.398	-1.89772	0.000240823	-2.2413	0.663697	0.000805063	0.0199553	No	meth_hypo_RNA_down	Zinc finger (C3HC4-type RING finger) family protein	GO:0005515|GO:0008270	protein binding | zinc ion binding	XP_004231968.1	AT2G22680.1
Solyc03g044910	SL3.0ch03	10918413	10920413	+	4028	8926	4646	11017	31.095	29.662	-1.43238	0.00547241	-2.45119	7.03058	2.86299e-05	0.00151709	Yes	meth_hypo_RNA_down	GNS1/SUR4 membrane protein family	GO:0016021	integral component of membrane	XP_004234683.1	AT4G36830.1
Solyc03g093140	SL3.0ch03	55749439	55751439	-	936	961	1190	1501	49.341	44.221	-5.11959	0.000525668	-1.84335	6.89109	5.38765e-07	6.19631e-05	No	meth_hypo_RNA_down	Glycerol-3-phosphate transporter, putative	GO:0016021|GO:0055085	integral component of membrane | transmembrane transport	XP_004235159.1	AT3G47420.1
Solyc03g114240	SL3.0ch03	65761558	65763558	-	2459	5376	2626	6563	31.385	28.578	-2.80716	6.27453e-05	-5.83852	-0.0244139	0.000739592	0.0187349	Yes	meth_hypo_RNA_down	Polygalacturonase non-catalytic protein	0	0	XP_004236111.1	AT1G70370.1
Solyc03g117010	SL3.0ch03	67767402	67769402	-	10169	8950	7189	7207	53.188	49.937	-3.25045	6.85689e-09	-1.16949	4.67167	7.13013e-05	0.00306527	No	meth_hypo_RNA_down	Sister chromatid cohesion protein PDS5 like B-B	0	0	XP_004236455.1	AT1G80810.2
Solyc03g117190	SL3.0ch03	67882308	67884308	+	63	3409	15	1579	1.815	0.941	-0.873487	0.0112024	-1.66754	1.96856	0.000365163	0.0109207	No	meth_hypo_RNA_down	LOW QUALITY:Vegetative cell wall protein gp1, putative	0	0	XP_019068238.1	0
Solyc03g119390	SL3.0ch03	69496904	69498904	+	896	7928	747	7557	10.154	8.996	-1.15846	0.0062933	-6.02074	-0.775538	7.80497e-05	0.00327278	No	meth_hypo_RNA_down	bHLH transcription factor 026	GO:0046983	protein dimerization activity	XP_004235809.1	AT1G73830.1
Solyc04g007020	SL3.0ch04	741769	743769	-	1159	2188	286	767	34.628	27.16	-7.46753	6.78015e-06	-0.926717	7.57469	0.00120762	0.0272517	No	meth_hypo_RNA_down	BRO1 domain-containing protein	0	0	XP_004236981.1	AT1G13310.1
Solyc04g014500	SL3.0ch04	4733455	4735455	-	2886	9527	2893	10309	23.25	21.913	-1.33647	0.00676258	-1.00439	6.84013	0.002084	0.0414091	No	meth_hypo_RNA_down	Nudix hydrolase-like protein	GO:0016787	hydrolase activity	XP_004236687.1	AT1G14860.1
Solyc04g054700	SL3.0ch04	53017008	53019008	-	4271	6909	4783	8389	38.202	36.312	-1.89027	0.0016911	-1.03611	5.49837	0.000135516	0.0050386	Yes	meth_hypo_RNA_down	GTF2H2	GO:0046872	metal ion binding	XP_025886529.1	AT1G05055.1
Solyc04g071000	SL3.0ch04	57951066	57953066	-	7176	4995	9205	6734	58.96	57.751	-1.2084	0.0230983	-3.6703	-0.479275	3.05495e-05	0.00159285	No	meth_hypo_RNA_down	clade XIII lectin receptor kinase	GO:0030246	carbohydrate binding	NP_001307546.1	AT5G42120.1
Solyc04g076630	SL3.0ch04	61621074	61623074	-	6625	5123	7692	6869	56.393	52.826	-3.56654	1.34687e-08	-3.30289	1.12419	0.000182926	0.00636469	No	meth_hypo_RNA_down	Rhamnogalacturonate lyase family protein	GO:0030246	carbohydrate binding	XP_004238020.1	AT1G09890.1
Solyc05g005460	SL3.0ch05	336006	338006	+	399	3847	312	3464	9.397	8.263	-1.13437	0.0389855	-2.20757	7.02449	2.1559e-05	0.00120676	No	meth_hypo_RNA_down	Cysteine/Histidine-rich C1 domain family protein	GO:0045454	cell redox homeostasis	XP_004238662.1	AT1G60420.1
Solyc05g006960	SL3.0ch05	1553463	1555463	-	295	284	12	31	50.95	27.907	-23.0429	0.00274454	-1.19432	3.83849	0.0023517	0.0451021	Yes	meth_hypo_RNA_down	Homeobox transcription factor	GO:0003676	nucleic acid binding	XP_010320657.2	AT1G27050.1
Solyc05g009350	SL3.0ch05	3487500	3489500	+	8130	7435	8213	8056	52.233	50.483	-1.75006	0.00130263	-1.26631	4.82706	0.000301275	0.00942783	No	meth_hypo_RNA_down	Zinc finger transcription factor 37	GO:0046872	metal ion binding	XP_004238929.1	AT5G56930.1
Solyc05g010620	SL3.0ch05	4851856	4853856	+	6757	4821	7398	5964	58.361	55.366	-2.99472	2.36153e-06	-2.47533	0.500882	0.00198827	0.0399939	Yes	meth_hypo_RNA_down	Pentatricopeptide repeat-containing family protein	GO:0008270	zinc ion binding	XP_010320817.1	AT1G68930.1
Solyc05g014280	SL3.0ch05	8092607	8094607	-	1784	6432	1057	5170	21.714	16.974	-4.73926	2.7049e-12	-1.80401	8.38296	0.00141229	0.0308017	No	meth_hypo_RNA_down	small heat shock protein 1	0	0	XP_010320556.1	AT4G27670.1
Solyc05g014580	SL3.0ch05	8444290	8446290	+	5985	5776	5096	5876	50.889	46.445	-4.44303	5.02864e-11	-5.38991	-1.64726	0.0014864	0.0320466	No	meth_hypo_RNA_down	LOW QUALITY:FER-like regulator of iron uptake	0	0	XP_025887554.1	0
Solyc05g043390	SL3.0ch05	57134271	57136271	-	3037	6480	2152	6139	31.911	25.956	-5.95546	1.14567e-17	-4.87933	0.0744233	0.000150194	0.00544289	No	meth_hypo_RNA_down	Pseudouridine-5'-phosphate glycosidase	0	0	XP_004248187.1	0
Solyc06g008130	SL3.0ch06	2008300	2010300	+	74	483	102	1315	13.285	7.198	-6.08715	4.45307e-05	-1.12086	5.7135	0.000143117	0.0052674	No	meth_hypo_RNA_down	Histone-lysine N-methyltransferase	GO:0018024	histone-lysine N-methyltransferase activity	XP_025887188.1	AT5G43990.2
Solyc06g008610	SL3.0ch06	2509399	2511399	+	1168	10559	1141	11238	9.96	9.217	-0.742699	0.0272122	-1.19962	5.52867	0.000108036	0.00418196	No	meth_hypo_RNA_down	WRKY transcription factor 21	GO:0003700|GO:0006355|GO:0043565	DNA-binding transcription factor activity | regulation of transcription, DNA-templated | sequence-specific DNA binding	NP_001315198.1	AT2G30590.1
Solyc06g009890	SL3.0ch06	4233377	4235377	-	6564	9120	4077	9709	41.852	29.573	-12.2781	4.60735e-105	-8.96776	1.01734	6.40054e-10	2.31247e-07	No	meth_hypo_RNA_down	PHD finger family protein	0	0	XP_010313748.1	0
Solyc06g062540	SL3.0ch06	39579632	39581632	+	3243	8079	3334	9506	28.643	25.966	-2.67762	3.57381e-06	-2.19176	2.6802	0.00186806	0.0384005	No	meth_hypo_RNA_down	putative acid phosphatase	GO:0016791	phosphatase activity	NP_001266264.1	AT1G73010.1
Solyc06g062550	SL3.0ch06	39584610	39586610	+	933	5341	1114	7297	14.871	13.245	-1.62634	0.00341946	-4.17982	0.02991	0.000167603	0.00597688	No	meth_hypo_RNA_down	LES459817 putative phosphatase 14A	GO:0016791	phosphatase activity	NP_001234501.2	AT1G17710.1
Solyc06g065690	SL3.0ch06	41233402	41235402	-	7158	4888	5454	3966	59.422	57.898	-1.52413	0.0139954	-4.18804	3.06566	8.91356e-09	2.16885e-06	No	meth_hypo_RNA_down	Serine/threonine protein phosphatase 2A regulatory subunit B	GO:0005488	binding	NP_001296947.1	AT5G25510.1
Solyc06g066270	SL3.0ch06	41698279	41700279	-	1173	6622	9	631	15.048	1.406	-13.6419	2.87057e-30	-7.18324	-2.42082	0.00012454	0.00468898	No	meth_hypo_RNA_down	Cytochrome P450, putative	GO:0016705|GO:0055114	oxidoreductase activity, acting on paired donors, with incorporation or reduction of molecular oxygen | oxidation-reduction process	XP_019069883.1	AT2G45550.1
Solyc06g068160	SL3.0ch06	42358264	42360264	-	287	2748	76	2932	9.456	2.527	-6.92975	2.95378e-30	-3.22594	2.30809	6.14542e-07	6.95599e-05	No	meth_hypo_RNA_down	SNF4	0	0	NP_001233959.1	AT1G15330.1
Solyc06g068200	SL3.0ch06	42370594	42372594	-	2038	3446	348	3038	37.163	10.278	-26.885	1.8253e-184	-4.28885	-1.87209	0.000356049	0.0107289	Yes	meth_hypo_RNA_down	Far1-related sequence 6	GO:0008270	zinc ion binding	XP_019069862.1	AT1G52520.1
Solyc06g068435	SL3.0ch06	42502673	42504673	+	5435	2655	2851	1591	67.182	64.183	-2.99891	0.000569706	-3.76255	2.1578	9.11232e-13	6.85241e-10	No	meth_hypo_RNA_down	Sister chromatid cohesion protein PDS5 like B-B	0	0	XP_025887402.1	0
Solyc06g074730	SL3.0ch06	46410698	46412698	+	5393	11868	6061	13975	31.244	30.251	-0.993295	0.0209492	-2.32825	2.79581	0.00174927	0.0365254	Yes	meth_hypo_RNA_down	Argonaute 5	GO:0005515	protein binding	NP_001265878.1	AT2G27880.1
Solyc07g005030	SL3.0ch07	86591	88591	-	1106	3795	1055	4221	22.567	19.996	-2.57061	0.00116465	-1.39533	5.17988	6.64031e-06	0.000463888	No	meth_hypo_RNA_down	Dicer-like 4	GO:0016891	endoribonuclease activity, producing 5'-phosphomonoesters	NP_001266210.2	AT5G20320.1
Solyc07g006140	SL3.0ch07	984796	986796	-	740	2551	696	2921	22.486	19.242	-3.2431	0.000737461	-2.41727	2.3222	0.00177676	0.0369268	Yes	meth_hypo_RNA_down	Eukaryotic peptide chain release factor subunit 1-1	0	0	XP_025884941.1	AT3G14690.1
Solyc07g006145	SL3.0ch07	988421	990421	-	2209	7516	2241	8975	22.715	19.98	-2.73427	1.81839e-06	-2.67771	6.0426	0.000232666	0.00769841	No	meth_hypo_RNA_down	Cytochrome P450	GO:0016705|GO:0055114	oxidoreductase activity, acting on paired donors, with incorporation or reduction of molecular oxygen | oxidation-reduction process	XP_004242635.1	0
Solyc07g007620	SL3.0ch07	2273927	2275927	+	4963	10584	4844	10794	31.923	30.976	-0.946729	0.0373329	-2.52282	0.356378	0.00191623	0.0391656	Yes	meth_hypo_RNA_down	Monogalactosyldiacylglycerol synthase	GO:0016758	transferase activity, transferring hexosyl groups	XP_004242736.1	AT5G20410.1
Solyc07g017420	SL3.0ch07	6902504	6904504	+	211	2034	212	2893	9.399	6.828	-2.57097	0.000532817	-4.56833	-2.41999	0.00156264	0.0334085	No	meth_hypo_RNA_down	LOW QUALITY:Transducin/WD40 repeat-like superfamily protein	0	0	XP_010327693.1	0
Solyc07g018070	SL3.0ch07	8986010	8988010	-	4364	7070	4838	8357	38.167	36.665	-1.50147	0.00931726	-2.03366	2.78645	0.00028611	0.00907232	No	meth_hypo_RNA_down	Double Clp-N motif-containing P-loop nucleoside triphosphate hydrolases superfamily protein, putative	GO:0019538	protein metabolic process	XP_004242919.1	AT4G29920.1
Solyc07g052480	SL3.0ch07	61100978	61102978	-	7846	8403	7767	11577	48.286	40.152	-8.13406	4.94995e-52	-2.80724	0.188606	0.000607532	0.0163782	Yes	meth_hypo_RNA_down	isocitrate lyase LEU18678	GO:0004451|GO:0019752	isocitrate lyase activity | carboxylic acid metabolic process	NP_001233878.2	AT3G21720.1
Solyc07g052960	SL3.0ch07	61491971	61493971	+	1452	4591	1449	5542	24.028	20.727	-3.30115	7.41571e-06	-1.52101	7.90061	0.000339969	0.0103843	Yes	meth_hypo_RNA_down	GRAS family TF	0	0	XP_004243434.1	AT3G49950.1
Solyc07g054630	SL3.0ch07	63028543	63030543	-	6957	7896	6044	9362	46.839	39.231	-7.60755	1.87313e-39	-2.34276	1.13343	0.00225225	0.0437579	No	meth_hypo_RNA_down	B3 domain-containing transcription factor VRN1	GO:0003677	DNA binding	XP_010323710.1	AT3G18990.1
Solyc08g007770	SL3.0ch08	2285275	2287275	+	5103	9745	5330	10647	34.368	33.36	-1.00781	0.0321971	-2.18014	6.0129	3.89002e-07	4.86961e-05	No	meth_hypo_RNA_down	Expansin-like protein	GO:0009664	plant-type cell wall organization	XP_004244596.1	AT4G22890.1
Solyc08g060920	SL3.0ch08	45844502	45846502	+	4686	8550	4772	10158	35.403	31.962	-3.44095	2.06757e-09	-1.41927	6.87201	5.78021e-05	0.00263036	No	meth_hypo_RNA_down	IDS4-like	0	0	NP_001234034.2	AT5G20150.1
Solyc08g061160	SL3.0ch08	47024083	47026083	-	2734	50329	3767	75973	5.152	4.724	-0.428263	0.000331904	-4.7554	0.288115	0.000516097	0.0144104	Yes	meth_hypo_RNA_down	LOW QUALITY:BnaC09g16480D protein	0	0	XP_019069085.1	0
Solyc08g065940	SL3.0ch08	54360489	54362489	-	528	6387	465	8430	7.636	5.228	-2.40792	1.39338e-09	-1.32609	6.14795	0.00238557	0.0456051	No	meth_hypo_RNA_down	Zinc finger CCCH domain-containing protein	GO:0046872	metal ion binding	XP_004245129.1	AT2G19810.1
Solyc08g066940	SL3.0ch08	55877651	55879651	-	5430	8902	5668	10934	37.887	34.14	-3.74678	1.81356e-11	-1.08513	4.08728	0.00125322	0.0280683	No	meth_hypo_RNA_down	Major facilitator superfamily protein	GO:0005215|GO:0006810|GO:0016020	transporter activity | transport | membrane	XP_004245185.1	AT3G16180.1
Solyc08g067190	SL3.0ch08	56258171	56260171	-	8759	11866	9980	13983	42.468	41.648	-0.820339	0.0412385	-1.88118	1.95008	0.00113784	0.026022	Yes	meth_hypo_RNA_down	Anaphase-promoting complex subunit 5	GO:0005515	protein binding	XP_019070931.1	AT1G06590.1
Solyc08g078610	SL3.0ch08	62506468	62508468	-	7089	6664	7352	8696	51.545	45.813	-5.73256	3.7331e-22	-0.831285	5.57643	0.00150337	0.0323541	No	meth_hypo_RNA_down	Zinc knuckle family protein	GO:0003676|GO:0008270	nucleic acid binding | zinc ion binding	XP_010325481.1	AT3G62330.1
Solyc08g079890	SL3.0ch08	63438580	63440580	+	2194	6016	1955	6210	26.724	23.944	-2.77985	4.28617e-05	-3.6952	1.51261	2.79145e-05	0.00148543	No	meth_hypo_RNA_down	P69e protein	GO:0004252|GO:0006508	serine-type endopeptidase activity | proteolysis	XP_019070935.1	AT1G04110.1
Solyc08g080400	SL3.0ch08	63807108	63809108	-	2186	5504	1992	6151	28.427	24.463	-3.9638	2.58587e-08	-1.56438	1.32013	0.0024556	0.0466943	No	meth_hypo_RNA_down	GRAS family transcription factor	0	0	XP_004245645.1	AT1G63100.1
Solyc08g082180	SL3.0ch08	65160955	65162955	-	5112	9461	6020	12009	35.079	33.391	-1.68792	0.00106074	-2.47972	4.16893	2.06771e-07	2.92323e-05	No	meth_hypo_RNA_down	Abscisic acid receptor PYL9-like protein	0	0	XP_004245523.1	AT1G01360.1
Solyc09g008640	SL3.0ch09	2102908	2104908	-	432	1881	246	1436	18.677	14.625	-4.0516	0.000570844	-3.8057	1.01733	2.68839e-05	0.00144702	No	meth_hypo_RNA_down	Kinase family protein	GO:0030247	polysaccharide binding	XP_019071269.1	AT5G02070.1
Solyc09g009100	SL3.0ch09	2448447	2450447	-	6337	6158	6904	7360	50.716	48.402	-2.31472	0.000138594	-1.214	6.74257	0.000388348	0.0114892	Yes	meth_hypo_RNA_down	SolycHsfA3	GO:0003700|GO:0005634|GO:0006355|GO:0043565	DNA-binding transcription factor activity | nucleus | regulation of transcription, DNA-templated | sequence-specific DNA binding	XP_019070985.1	AT5G03720.1
Solyc09g014210	SL3.0ch09	5703400	5705400	+	5445	6552	7131	8943	45.386	44.364	-1.02278	0.0447908	-2.26026	0.875365	0.00228537	0.0441377	No	meth_hypo_RNA_down	Pentatricopeptide repeat-containing family protein	GO:0005515	protein binding	XP_004246847.1	AT3G09060.1
Solyc09g018220	SL3.0ch09	13621615	13623615	-	318	184	4344	5086	63.347	46.066	-17.2809	1.40644e-13	-1.65383	3.22905	0.00228054	0.0440894	No	meth_hypo_RNA_down	Tobacco mosaic virus resistance-2	GO:0043531	ADP binding	NP_001318061.1	AT3G46530.1
Solyc09g018780	SL3.0ch09	16996971	16998971	+	176	316	826	2146	35.772	27.793	-7.97963	0.000313882	-1.90041	2.54252	1.17855e-05	0.000744777	No	meth_hypo_RNA_down	Oligoribonuclease	GO:0003676	nucleic acid binding	XP_004246252.1	AT2G26970.1
Solyc09g042710	SL3.0ch09	25252759	25254759	-	1259	2697	3992	11610	31.825	25.586	-6.23861	2.06281e-14	-1.60017	3.38989	5.25446e-05	0.00243763	No	meth_hypo_RNA_down	weak chloroplast movement under blue light protein (DUF827)	0	0	XP_004246982.1	AT2G38370.1
Solyc09g055910	SL3.0ch09	46309757	46311757	-	1077	2150	5996	13077	33.375	31.437	-1.93754	0.0168897	-0.938853	4.90004	0.000546776	0.015102	No	meth_hypo_RNA_down	FAD-dependent oxidoreductase family protein	GO:0016491|GO:0055114	oxidoreductase activity | oxidation-reduction process	XP_004247025.1	AT5G48440.1
Solyc09g055920	SL3.0ch09	46409182	46411182	-	824	866	9477	10924	48.757	46.454	-2.30379	0.0366929	-1.17524	3.36266	0.000877114	0.0213129	No	meth_hypo_RNA_down	Poly(A)-specific ribonuclease PARN-like protein	GO:0003676	nucleic acid binding	XP_004247263.1	AT3G25430.1
Solyc09g059020	SL3.0ch09	53237570	53239570	-	595	1125	3425	7767	34.593	30.602	-3.99081	0.000725719	-6.01153	4.88472	9.52214e-38	8.5147e-34	No	meth_hypo_RNA_down	Quinone-oxidoreductase QR1	GO:0016491	oxidoreductase activity	XP_010326282.1	AT4G13010.1
Solyc09g059130	SL3.0ch09	53654259	53656259	+	497	642	5277	7815	43.635	40.307	-3.32771	0.0167739	-8.90404	-0.713136	2.02855e-08	4.14613e-06	No	meth_hypo_RNA_down	LOW QUALITY:RING/U-box superfamily protein	GO:0005515|GO:0008270	protein binding | zinc ion binding	XP_004247279.1	AT3G19950.1
Solyc09g059270	SL3.0ch09	54389835	54391835	+	1466	582	5186	6070	71.582	46.073	-25.5088	8.20886e-101	-1.92672	7.59191	5.88437e-11	3.00674e-08	No	meth_hypo_RNA_down	ER lumen retaining receptor family-like protein	GO:0006621|GO:0016021|GO:0046923	protein retention in ER lumen | integral component of membrane | ER retention sequence binding	XP_004247062.1	AT3G25160.1
Solyc09g060130	SL3.0ch09	58035269	58037269	-	142	402	749	3029	26.103	19.825	-6.27764	0.00074373	-6.58379	-2.91018	0.000502361	0.014104	No	meth_hypo_RNA_down	LOW QUALITY:Homeobox-leucine zipper family protein	GO:0008289	lipid binding	XP_025888845.1	AT3G03260.1
Solyc09g072660	SL3.0ch09	65699608	65701608	-	3772	2949	2738	2509	56.123	52.182	-3.9404	1.80987e-05	-4.64323	0.857333	3.87732e-06	0.000306823	Yes	meth_hypo_RNA_down	FAD-binding Berberine family protein	GO:0050660	flavin adenine dinucleotide binding	XP_004247512.1	AT1G30760.1
Solyc09g089730	SL3.0ch09	69926507	69928507	+	1294	2229	867	1792	36.73	32.606	-4.12382	0.000583107	-2.37352	1.95514	0.000688677	0.0179669	No	meth_hypo_RNA_down	2-oxoglutarate (2OG) and Fe(II)-dependent oxygenase superfamily protein	GO:0016491|GO:0055114	oxidoreductase activity | oxidation-reduction process	XP_004247706.1	AT1G06620.1
Solyc10g008240	SL3.0ch10	2334196	2336196	+	389	3529	313	3426	9.929	8.371	-1.55731	0.0113065	-1.5331	3.21211	0.000211152	0.00712499	No	meth_hypo_RNA_down	Disease resistance protein	GO:0043531	ADP binding	XP_019071640.1	AT3G46730.1
Solyc10g012210	SL3.0ch10	4613665	4615665	+	3836	4154	1329	3154	48.01	29.645	-18.3647	9.10545e-89	-8.95383	-0.546276	1.19075e-11	7.2188e-09	No	meth_hypo_RNA_down	AT-rich interactive domain protein	0	0	XP_010326976.1	AT2G46040.1
Solyc10g081300	SL3.0ch10	62530988	62532988	-	3479	4183	3435	5505	45.406	38.423	-6.98308	5.48946e-19	-3.08722	1.02565	0.000999044	0.0235091	Yes	meth_hypo_RNA_down	Metacaspase 9	0	0	XP_004249355.1	AT5G04200.1
Solyc11g005760	SL3.0ch11	600686	602686	-	2777	7224	2696	8323	27.767	24.467	-3.30039	8.29133e-08	-3.13372	1.20803	0.000454007	0.0129808	Yes	meth_hypo_RNA_down	Hexosyltransferase	GO:0016757	transferase activity, transferring glycosyl groups	XP_010312475.1	AT3G18660.2
Solyc11g005990	SL3.0ch11	799767	801767	-	2993	4812	4106	7772	38.347	34.568	-3.7791	1.04244e-07	-5.63673	-3.09862	0.00227568	0.0440458	No	meth_hypo_RNA_down	Transcriptional corepressor SEUSS-like protein	0	0	XP_010312489.1	AT1G43850.1
Solyc11g010710	SL3.0ch11	3756221	3758221	+	1912	9051	1927	10223	17.44	15.86	-1.5804	0.000940039	-1.55634	2.89731	0.000506507	0.0142043	No	meth_hypo_RNA_down	AP2-like ethylene-responsive transcription factor	GO:0003700|GO:0006355|GO:0007275	DNA-binding transcription factor activity | regulation of transcription, DNA-templated | multicellular organism development	XP_004250153.2	AT5G10510.3
Solyc11g071500	SL3.0ch11	55242836	55244836	+	3462	5497	3084	5300	38.643	36.784	-1.85835	0.0073918	-1.25569	2.52876	0.00261579	0.0490108	No	meth_hypo_RNA_down	Myb family transcription factor family protein	GO:0003677	DNA binding	XP_004251428.1	AT5G08520.1
Solyc11g071690	SL3.0ch11	55391960	55393960	-	6354	8238	6428	8711	43.544	42.46	-1.08454	0.0309437	-1.22757	5.24414	0.000907605	0.0218755	No	meth_hypo_RNA_down	Zinc knuckle family protein, putative	GO:0003676|GO:0008270	nucleic acid binding | zinc ion binding	XP_004251209.1	AT3G43590.1
Solyc11g072400	SL3.0ch11	55867513	55869513	+	1594	3480	1143	3589	31.415	24.155	-7.26037	4.30645e-15	-2.06511	1.24078	0.00258969	0.0485982	No	meth_hypo_RNA_down	Defects in morphology protein 1	GO:0045145	single-stranded DNA 5'-3' exodeoxyribonuclease activity	XP_004251259.1	AT5G60370.1
Solyc12g006225	SL3.0ch12	742078	744078	+	3034	9747	3203	12750	23.738	20.078	-3.66063	2.5565e-13	-2.62188	2.92439	9.92951e-05	0.00392441	Yes	meth_hypo_RNA_down	serine-rich protein-like protein	0	0	XP_025886885.1	0
Solyc12g006230	SL3.0ch12	747708	749708	-	1911	9693	1654	9910	16.468	14.303	-2.16545	5.84664e-06	-1.70446	4.52166	0.000624442	0.016673	No	meth_hypo_RNA_down	RING/U-box superfamily protein, putative	GO:0005515|GO:0008270	protein binding | zinc ion binding	XP_004243593.1	AT2G04240.1
Solyc12g008900	SL3.0ch12	2213195	2215195	-	1073	5465	987	5574	16.412	15.043	-1.36831	0.0181639	-4.7411	2.67705	0.000624632	0.016673	No	meth_hypo_RNA_down	cytokinin oxidase6	GO:0050660	flavin adenine dinucleotide binding	XP_004251670.1	AT5G56970.1
Solyc12g009480	SL3.0ch12	2737850	2739850	-	5441	9336	4953	9404	36.821	34.499	-2.32188	3.43525e-05	-1.37617	4.11742	0.00247154	0.0468977	No	meth_hypo_RNA_down	SPX domain-containing family protein	GO:0016036	cellular response to phosphate starvation	XP_004251718.1	AT2G26660.1
Solyc12g010200	SL3.0ch12	3312374	3314374	+	9994	9220	11241	11610	52.014	49.193	-2.82156	1.34328e-08	-1.87454	2.67641	0.000588014	0.0159697	Yes	meth_hypo_RNA_down	Hexosyltransferase	GO:0047262	polygalacturonate 4-alpha-galacturonosyltransferase activity	XP_010313831.1	AT1G06780.2
Solyc12g014420	SL3.0ch12	5388270	5390270	+	1113	8363	848	8085	11.745	9.493	-2.25257	9.35652e-07	-3.87239	-0.105469	0.00242112	0.0462353	No	meth_hypo_RNA_down	Glucan endo-1,3-beta-glucosidase, putative	GO:0005975	carbohydrate metabolic process	XP_004251911.1	AT5G55180.2
Solyc12g017230	SL3.0ch12	6420132	6422132	+	8920	11728	10636	14564	43.2	42.206	-0.993961	0.018199	-1.43086	5.24649	0.000125986	0.0047372	No	meth_hypo_RNA_down	modifier of snc1	0	0	XP_004251949.1	AT4G26450.1
Solyc12g068070	SL3.0ch12	29130753	29132753	-	40	1169	28	1335	3.309	2.054	-1.25423	0.0263895	-1.24298	6.21559	0.000112859	0.00432662	No	meth_hypo_RNA_down	Filament-like plant protein	0	0	XP_010314562.1	AT3G05270.1
Solyc12g038810	SL3.0ch12	51891462	51893462	+	5776	6940	2840	5439	45.423	34.304	-11.1194	1.36605e-56	-6.34829	1.28588	4.12597e-06	0.000318743	No	meth_hypo_RNA_down	Protein kinase	0	0	XP_010312865.1	AT4G38470.1
Solyc12g094490	SL3.0ch12	65682151	65684151	+	322	3944	366	5190	7.548	6.587	-0.960581	0.0343553	-1.05906	5.22981	0.00170655	0.0358637	No	meth_hypo_RNA_down	Pre-mRNA cleavage complex 2 Pcf11	GO:0046872	metal ion binding	XP_004253131.1	AT4G04885.1
Solyc12g098600	SL3.0ch12	67028423	67030423	+	3014	5880	2406	5223	33.888	31.538	-2.35046	0.000982151	-3.73298	4.06796	0.000307779	0.0095894	Yes	meth_hypo_RNA_down	Glycosyltransferase	GO:0008152|GO:0016758	metabolic process | transferase activity, transferring hexosyl groups	XP_004252977.1	AT4G14090.1
Solyc12g099900	SL3.0ch12	67825277	67827277	+	568	8183	429	7491	6.491	5.417	-1.07402	0.00243805	-1.66705	4.02006	0.000567338	0.0155695	No	meth_hypo_RNA_down	SCL3 (scarecrow-like 3)	GO:0000989|GO:0005634	obsolete transcription factor activity, transcription factor binding | nucleus	XP_004252879.1	AT1G50420.1
Solyc00g048510	SL3.0ch00	12614041	12616041	+	9412	13668	12010	19413	40.78	38.22	-2.55948	2.90383e-09	3.35303	2.93276	6.4258e-05	0.00284201	No	meth_hypo_RNA_up	Phloem protein 2	0	0	XP_004253374.1	AT1G31200.1
Solyc00g050130	SL3.0ch00	12693606	12695606	+	3878	4503	4699	6203	46.271	43.102	-3.16914	1.21491e-05	2.59423	3.58135	8.58791e-05	0.00352262	No	meth_hypo_RNA_up	Glycosyltransferase	GO:0008152|GO:0016758	metabolic process | transferase activity, transferring hexosyl groups	XP_004253377.1	AT4G34138.1
Solyc01g005420	SL3.0ch01	294380	296380	-	3098	4623	2625	4305	40.124	37.879	-2.24555	0.00354819	6.84936	3.03024	1.1376e-07	1.77685e-05	No	meth_hypo_RNA_up	LOW QUALITY:Calcium-dependent lipid-binding (CaLB domain) family protein	GO:0005515	protein binding	XP_004250568.1	0
Solyc01g005500	SL3.0ch01	342743	344743	+	1324	6870	1166	7469	16.158	13.503	-2.65498	1.54859e-06	9.94414	1.75513	4.94371e-05	0.00232056	No	meth_hypo_RNA_up	NAD(P)-binding Rossmann-fold superfamily protein	0	0	XP_004228706.1	AT1G52340.1
Solyc01g005560	SL3.0ch01	392352	394352	+	615	7411	495	7155	7.663	6.471	-1.19201	0.00253812	1.20796	8.1311	6.91745e-05	0.00299907	No	meth_hypo_RNA_up	Isocitrate dehydrogenase [NADP]	GO:0016616|GO:0055114	oxidoreductase activity, acting on the CH-OH group of donors, NAD or NADP as acceptor | oxidation-reduction process	XP_004228607.1	AT1G65930.1
Solyc01g006290	SL3.0ch01	882366	884366	+	3166	7976	2535	7048	28.415	26.453	-1.96191	0.00117404	11.009	2.82469	9.32502e-08	1.50922e-05	No	meth_hypo_RNA_up	Peroxidase	GO:0004601|GO:0055114	peroxidase activity | oxidation-reduction process	XP_004228671.1	AT5G06720.1
Solyc01g006300	SL3.0ch01	891334	893334	-	11289	7957	10968	9004	58.656	54.917	-3.73946	2.35814e-13	10.3524	4.22039	1.64703e-07	2.44445e-05	Yes	meth_hypo_RNA_up	LECEVI1A	GO:0004601|GO:0055114	peroxidase activity | oxidation-reduction process	NP_001234132.2	AT5G06720.1
Solyc01g006400	SL3.0ch01	1022356	1024356	-	5234	7759	4905	7993	40.283	38.029	-2.25408	0.000178416	12.9405	3.30892	1.93989e-08	3.9877e-06	No	meth_hypo_RNA_up	Extensin-like protein	0	0	NP_001265976.1	0
Solyc01g007000	SL3.0ch01	1565382	1567382	+	2450	8022	2330	8498	23.396	21.518	-1.87744	0.000805203	7.65418	3.34072	9.76697e-06	0.000646935	No	meth_hypo_RNA_up	U-box domain-containing family protein	GO:0005488	binding	XP_004228696.1	AT2G35930.1
Solyc01g007010	SL3.0ch01	1568975	1570975	+	2319	5039	2249	5933	31.517	27.487	-4.02955	5.65861e-08	11.2846	2.58387	4.37876e-07	5.30913e-05	No	meth_hypo_RNA_up	U-box domain-containing family protein	GO:0005488	binding	XP_004228691.1	AT2G35930.1
Solyc01g007030	SL3.0ch01	1582763	1584763	-	3759	6384	2345	6032	37.06	27.993	-9.06673	6.15208e-38	7.77257	4.20892	1.71204e-07	2.50968e-05	Yes	meth_hypo_RNA_up	U-box domain-containing family protein	GO:0005488	binding	XP_010315681.1	AT2G35930.1
Solyc01g007040	SL3.0ch01	1583263	1585263	-	5270	9344	3562	8244	36.061	30.171	-5.89021	3.8803e-23	11.534	3.13121	3.80488e-10	1.47927e-07	Yes	meth_hypo_RNA_up	U-box domain-containing family protein	GO:0005488	binding	XP_010315681.1	AT3G52450.1
Solyc01g008050	SL3.0ch01	2132652	2134652	+	778	5513	630	5744	12.367	9.884	-2.48297	9.5481e-06	8.14645	-1.17019	0.000638511	0.0169801	Yes	meth_hypo_RNA_up	Trichome birefringence-like 27	GO:0005794|GO:0010411|GO:0016413	Golgi apparatus | xyloglucan metabolic process | O-acetyltransferase activity	XP_004228546.1	AT1G70230.1
Solyc01g008540	SL3.0ch01	2578563	2580563	-	9915	6779	9796	7349	59.393	57.136	-2.2564	2.62654e-05	8.08193	4.5196	7.0417e-13	5.59706e-10	Yes	meth_hypo_RNA_up	Cinnamoyl CoA reductase-like protein	GO:0003824|GO:0050662	catalytic activity | coenzyme binding	XP_019069502.1	AT5G19440.1
Solyc01g008850	SL3.0ch01	2810081	2812081	+	9722	11118	8410	10021	46.651	45.63	-1.02103	0.0235056	1.20338	8.03442	6.06176e-05	0.00271746	No	meth_hypo_RNA_up	Non-specific serine/threonine protein kinase	GO:0007165	signal transduction	XP_025885359.1	AT2G26980.4
Solyc01g009780	SL3.0ch01	4137249	4139249	+	5958	9035	6793	10716	39.739	38.797	-0.941355	0.042012	1.79127	6.75372	1.89073e-06	0.00017385	Yes	meth_hypo_RNA_up	LITAF-domain-containing protein	0	0	XP_004228438.1	AT5G13190.1
Solyc01g056850	SL3.0ch01	56987295	56989295	-	2481	14812	2438	16463	14.347	12.899	-1.44806	5.66252e-05	2.75663	4.8358	0.000600143	0.0162007	Yes	meth_hypo_RNA_up	CTP synthase	GO:0003883|GO:0006241	CTP synthase activity | CTP biosynthetic process	XP_004229051.1	AT1G30820.1
Solyc01g067480	SL3.0ch01	75987587	75989587	+	2549	7348	2668	8496	25.755	23.898	-1.85704	0.00136795	1.43701	3.55928	0.000399313	0.0117649	No	meth_hypo_RNA_up	Acyl-CoA-binding domain-containing protein 4	GO:0005515	protein binding	XP_010321165.1	AT5G18590.1
Solyc01g079200	SL3.0ch01	78146506	78148506	-	4405	7311	3537	6471	37.598	35.342	-2.25643	0.000463966	8.04569	1.57614	9.64674e-06	0.000640902	No	meth_hypo_RNA_up	gibberellin 2-oxidase 3	GO:0016491|GO:0055114	oxidoreductase activity | oxidation-reduction process	NP_001234747.2	AT1G02400.1
Solyc01g079470	SL3.0ch01	78375113	78377113	+	4414	5662	4019	5811	43.807	40.885	-2.92202	3.09142e-05	4.41695	3.28484	1.08876e-07	1.72312e-05	No	meth_hypo_RNA_up	CP12	0	0	XP_004229393.1	AT3G62410.1
Solyc01g079580	SL3.0ch01	78533392	78535392	+	2523	8643	2777	10673	22.595	20.647	-1.94854	0.000187765	3.60223	4.39668	2.77465e-07	3.67569e-05	No	meth_hypo_RNA_up	DNAJ heat shock N-terminal domain-containing family protein	GO:0005515	protein binding	XP_004229402.1	AT2G47440.1
Solyc01g079670	SL3.0ch01	78651137	78653137	-	2011	6860	1966	7371	22.669	21.056	-1.61336	0.00551426	4.52665	2.76999	6.89283e-06	0.000475951	No	meth_hypo_RNA_up	LOW QUALITY:cotton fiber protein	0	0	XP_004229560.2	AT5G38700.1
Solyc01g079940	SL3.0ch01	78952701	78954701	-	6133	5593	7127	7596	52.303	48.407	-3.89532	6.41749e-10	3.90927	1.52521	0.00143717	0.0311543	No	meth_hypo_RNA_up	Eukaryotic aspartyl protease family protein	GO:0004190|GO:0006508	aspartic-type endopeptidase activity | proteolysis	XP_004229430.1	AT1G03220.1
Solyc01g080570	SL3.0ch01	79669163	79671163	-	2764	8522	2475	8805	24.491	21.941	-2.54903	6.59233e-06	10.1371	0.22227	0.000591801	0.016036	No	meth_hypo_RNA_up	inosine-uridine preferring nucleoside hydrolase family protein	0	0	XP_004229485.1	AT5G18860.1
Solyc01g080600	SL3.0ch01	79691478	79693478	+	1799	5105	1817	6814	26.057	21.052	-5.00534	7.9323e-13	2.96009	2.78218	0.00037419	0.0111348	No	meth_hypo_RNA_up	Histone H3	GO:0046982	protein heterodimerization activity	XP_010324306.1	AT5G65360.1
Solyc01g081310	SL3.0ch01	80394371	80396371	+	283	791	130	510	26.35	20.313	-6.03759	0.0033193	2.81702	2.61312	2.7199e-06	0.000229446	No	meth_hypo_RNA_up	glutathione S-transferase T3	GO:0005515	protein binding	NP_001234088.1	AT2G29420.1
Solyc01g073640	SL3.0ch01	80896020	80898020	+	4135	6512	5039	8615	38.837	36.905	-1.93229	0.00146461	5.06901	5.36925	5.14696e-06	0.000383534	No	meth_hypo_RNA_up	alcohol dehydrogenase-3,Pfam:PF13561	0	0	NP_001233856.1	AT2G47140.1
Solyc01g073820	SL3.0ch01	81058530	81060530	-	7597	9249	8295	10728	45.097	43.605	-1.49165	0.00306299	7.56478	1.13884	2.71865e-05	0.00145788	No	meth_hypo_RNA_up	LOW QUALITY:Cysteine/Histidine-rich C1 domain family protein	0	0	XP_019068254.1	AT2G44380.1
Solyc01g073890	SL3.0ch01	81094087	81096087	+	5303	9330	5809	11203	36.24	34.146	-2.09352	9.11099e-05	6.51274	3.1285	8.91587e-10	3.02856e-07	Yes	meth_hypo_RNA_up	Cysteine/Histidine-rich C1 domain family protein	0	0	XP_004229346.1	AT2G27660.1
Solyc01g088560	SL3.0ch01	83213794	83215794	-	6072	8935	5543	9861	40.461	35.984	-4.47696	3.61012e-15	1.32837	6.58984	7.99506e-05	0.00333295	Yes	meth_hypo_RNA_up	Rab family GTPase	GO:0005525|GO:0007264	GTP binding | small GTPase mediated signal transduction	XP_004229706.1	AT2G44610.1
Solyc01g090310	SL3.0ch01	83845468	83847468	+	2691	9852	2612	10405	21.454	20.066	-1.38813	0.00407555	7.74674	0.731142	5.64526e-06	0.000408744	No	meth_hypo_RNA_up	Ethylene-responsive transcription factor, putative	GO:0003700|GO:0006355	DNA-binding transcription factor activity | regulation of transcription, DNA-templated	XP_010325364.1	AT2G44840.1
Solyc01g091030	SL3.0ch01	84620756	84622756	+	3373	9513	2764	9103	26.176	23.291	-2.88421	2.16289e-07	4.10892	0.341311	0.000561254	0.0154304	No	meth_hypo_RNA_up	Small auxin up-regulated RNA1	GO:0009733	response to auxin	XP_004229795.1	AT3G60690.1
Solyc01g095140	SL3.0ch01	86395517	86397517	+	2991	6516	3132	7854	31.461	28.509	-2.95202	4.95306e-06	6.5603	6.16243	3.18531e-13	2.71267e-10	No	meth_hypo_RNA_up	Late embryogenesis abundant protein	GO:0009269	response to desiccation	NP_001233938.1	AT1G01470.1
Solyc01g095990	SL3.0ch01	86974470	86976470	+	4426	6795	4219	8432	39.444	33.349	-6.09476	9.86433e-22	1.07625	7.01534	0.00118835	0.026936	No	meth_hypo_RNA_up	Phosphatidylinositol 3-and 4-kinase family protein	GO:0016301	kinase activity	XP_004229985.1	AT2G46500.1
Solyc01g096360	SL3.0ch01	87313355	87315355	+	5180	7469	5652	8628	40.952	39.58	-1.37202	0.012668	7.02145	2.55265	4.95186e-09	1.35205e-06	No	meth_hypo_RNA_up	Rho GTPase activating protein 2	GO:0007165	signal transduction	NP_001316464.1	AT2G46710.1
Solyc01g096420	SL3.0ch01	87396320	87398320	+	5336	3516	5464	4484	60.28	54.926	-5.35455	3.84079e-13	4.51634	3.99097	0.000589649	0.0159898	Yes	meth_hypo_RNA_up	NADPH:quinone oxidoreductase	GO:0016491	oxidoreductase activity	NP_001316466.1	AT3G27890.1
Solyc01g097270	SL3.0ch01	88056392	88058392	-	5190	9507	5241	10942	35.313	32.386	-2.92749	8.6953e-08	6.10614	4.73264	3.83944e-08	7.13324e-06	No	meth_hypo_RNA_up	pathogen-induced protein	GO:0042742|GO:0050832	defense response to bacterium | defense response to fungus	NP_001315589.1	AT3G04720.1
Solyc01g098760	SL3.0ch01	89057097	89059097	+	6638	2732	6954	3030	70.843	69.651	-1.19167	0.0361768	1.39969	6.33998	1.04081e-05	0.000675638	No	meth_hypo_RNA_up	RING/U-box superfamily protein	GO:0030001|GO:0046872	metal ion transport | metal ion binding	XP_004230176.1	AT3G06130.1
Solyc01g100010	SL3.0ch01	89968203	89970203	-	4056	7162	3687	8418	36.156	30.458	-5.69769	1.49913e-19	2.49521	5.17101	7.82421e-08	1.29948e-05	No	meth_hypo_RNA_up	F-box protein	GO:0005515	protein binding	XP_004230267.1	AT1G09155.1
Solyc01g101100	SL3.0ch01	90829283	90831283	-	2090	6924	1112	5650	23.186	16.445	-6.74132	9.05691e-25	1.05108	4.88191	0.00206414	0.0411311	No	meth_hypo_RNA_up	Kinase family protein	GO:0005524	ATP binding	XP_025888756.1	AT1G56720.1
Solyc01g101170	SL3.0ch01	90887986	90889986	-	4510	8950	4869	10566	33.507	31.545	-1.9615	0.000323333	12.4749	2.29738	2.01576e-06	0.000181611	No	meth_hypo_RNA_up	Viridiflorene synthase	GO:0008152|GO:0010333|GO:0016829	metabolic process | terpene synthase activity | lyase activity	NP_001239040.1	AT5G23960.1
Solyc01g102390	SL3.0ch01	91091598	91093598	+	3012	6455	2766	6618	31.816	29.476	-2.34008	0.000402625	2.72014	3.20024	0.00131124	0.0289824	No	meth_hypo_RNA_up	Germin-like protein (AHRD V1 ***- O65358_SOLTU)%3B contains Interpro domain(s) IPR014710	GO:0045735	nutrient reservoir activity	XP_004230374.2	AT1G09560.1
Solyc01g102700	SL3.0ch01	91307947	91309947	+	10679	6470	13784	8870	62.272	60.846	-1.42609	0.00258686	2.93201	2.53962	1.84658e-05	0.00107222	No	meth_hypo_RNA_up	Protein kinase-like protein	GO:0005524	ATP binding	XP_004230391.1	AT5G49760.1
Solyc01g102840	SL3.0ch01	91406050	91408050	+	140	1184	45	990	10.574	4.348	-6.22619	1.96008e-08	2.01159	6.72908	0.00109796	0.0253367	No	meth_hypo_RNA_up	TIR-NBS-LRR class disease resistance protein	GO:0043531	ADP binding	XP_025884749.1	AT5G36930.2
Solyc01g103200	SL3.0ch01	91735184	91737184	+	2830	6339	2821	7749	30.865	26.689	-4.17613	2.23554e-10	1.25707	6.00581	5.88622e-05	0.00265496	Yes	meth_hypo_RNA_up	plasminogen activator inhibitor	0	0	XP_019067332.1	AT1G57680.1
Solyc01g103650	SL3.0ch01	92074382	92076382	+	183	5263	145	5237	3.36	2.694	-0.666099	0.0235483	3.76919	4.46544	0.00162981	0.034617	No	meth_hypo_RNA_up	Embryogenesis-associated EMB8	0	0	XP_004230460.1	AT1G34340.1
Solyc01g105410	SL3.0ch01	93480094	93482094	+	2752	5358	1827	4813	33.933	27.515	-6.41836	1.97545e-16	3.31224	7.95823	3.43218e-09	9.98066e-07	No	meth_hypo_RNA_up	Phosphate-induced protein 1	0	0	XP_004230631.1	AT5G64260.1
Solyc01g105630	SL3.0ch01	93628448	93630448	+	3830	8423	3077	8696	31.258	26.136	-5.12158	8.24843e-18	10.8495	2.08236	6.79334e-09	1.76076e-06	Yes	meth_hypo_RNA_up	Calmodulin, putative	GO:0005509	calcium ion binding	XP_004230637.1	AT3G43810.1
Solyc01g106290	SL3.0ch01	94120325	94122325	+	766	1864	628	2329	29.125	21.238	-7.88773	2.63905e-11	2.60155	5.94597	4.73936e-09	1.32435e-06	No	meth_hypo_RNA_up	LOW QUALITY:Lipid binding protein	0	0	XP_010321626.2	0
Solyc01g106830	SL3.0ch01	94469477	94471477	+	2544	8458	2993	10874	23.123	21.584	-1.53945	0.00263153	10.4857	0.873079	2.37435e-07	3.25527e-05	No	meth_hypo_RNA_up	Phytosulfokines 3	GO:0005576|GO:0008083|GO:0008283	extracellular region | growth factor activity | cell population proliferation	NP_001293111.1	AT5G65870.1
Solyc01g107100	SL3.0ch01	94625062	94627062	+	2920	4543	2627	4465	39.126	37.042	-2.08462	0.00615809	3.15067	3.89275	8.37708e-05	0.00345013	Yes	meth_hypo_RNA_up	LOW QUALITY:beta-1,4-xylosidase	0	0	XP_010315179.1	AT3G19615.1
Solyc01g107400	SL3.0ch01	94864795	94866795	-	6286	7834	6041	8006	44.518	43.006	-1.51279	0.00649081	1.92569	8.68083	0.000180972	0.00631512	No	meth_hypo_RNA_up	IAA-amido synthetase	0	0	NP_001308616.1	AT2G14960.1
Solyc01g109340	SL3.0ch01	96227100	96229100	-	1262	1734	945	1628	42.123	36.728	-5.39528	4.03095e-05	2.21268	3.62291	0.000114659	0.00437685	No	meth_hypo_RNA_up	RING/U-box superfamily protein	GO:0005515|GO:0008270	protein binding | zinc ion binding	XP_019067463.1	AT2G23780.1
Solyc01g109570	SL3.0ch01	96396548	96398548	-	2517	7425	2187	6999	25.317	23.808	-1.50887	0.00925262	1.2096	5.94569	0.000895178	0.0216363	No	meth_hypo_RNA_up	Beta-1,3-glucanase 12	GO:0005975	carbohydrate metabolic process	XP_004230886.1	AT4G34480.1
Solyc01g109590	SL3.0ch01	96408787	96410787	-	4790	9565	5222	11863	33.368	30.565	-2.80334	1.54723e-07	1.24536	5.48195	0.000689482	0.0179748	No	meth_hypo_RNA_up	Kinase family protein	GO:0005524	ATP binding	XP_004230898.1	AT4G34500.1
Solyc01g109700	SL3.0ch01	96507268	96509268	+	760	3794	392	4671	16.689	7.742	-8.94618	1.88066e-40	1.62989	4.39206	0.00101285	0.0237248	No	meth_hypo_RNA_up	bHLH transcription factor 010	GO:0046983	protein dimerization activity	NP_001335303.1	AT4G34530.1
Solyc01g109890	SL3.0ch01	96647708	96649708	+	3670	4312	4388	5635	45.978	43.779	-2.19914	0.00223016	1.36793	6.33175	0.000256316	0.00834204	No	meth_hypo_RNA_up	DNAJ heat shock N-terminal domain-containing protein	0	0	XP_010315316.1	AT4G39150.1
Solyc01g110130	SL3.0ch01	96824652	96826652	-	465	3248	393	3186	12.524	10.981	-1.54284	0.0226356	1.36929	4.83611	0.00208469	0.0414091	No	meth_hypo_RNA_up	DNA helicase	GO:0003677|GO:0005524|GO:0006260	DNA binding | ATP binding | DNA replication	XP_004230864.1	AT2G16440.1
Solyc01g110370	SL3.0ch01	97006412	97008412	-	4246	5862	4522	6609	42.006	40.625	-1.38105	0.0225509	1.65641	4.32743	4.79369e-05	0.00225785	No	meth_hypo_RNA_up	Zinc finger, B-box	GO:0005622|GO:0008270	intracellular | zinc ion binding	XP_010315332.1	AT2G21320.1
Solyc01g110480	SL3.0ch01	97091043	97093043	+	2260	9173	2040	10303	19.767	16.528	-3.23975	1.98061e-10	1.21754	6.753	0.00112318	0.0257361	No	meth_hypo_RNA_up	BZIP transcription factor	GO:0003700|GO:0006355|GO:0043565	DNA-binding transcription factor activity | regulation of transcription, DNA-templated | sequence-specific DNA binding	XP_004230901.1	AT4G38900.1
Solyc01g111970	SL3.0ch01	98025336	98027336	-	445	7513	403	7748	5.592	4.944	-0.647679	0.0343553	2.16427	5.67059	0.000797766	0.0198294	No	meth_hypo_RNA_up	L-ascorbate oxidase-like protein	GO:0055114	oxidation-reduction process	XP_004231076.1	AT1G76160.1
Solyc02g020890	SL3.0ch02	20763292	20765292	+	5656	3615	6507	4647	61.007	58.338	-2.66963	9.80657e-05	3.44822	5.31437	2.35322e-07	3.25527e-05	Yes	meth_hypo_RNA_up	Leucine-rich repeat receptor-like protein kinase family	0	0	XP_004231521.1	AT3G19970.1
Solyc02g022890	SL3.0ch02	24859150	24861150	+	3421	6468	3251	6680	34.594	32.736	-1.85812	0.00370245	6.81604	-0.0202057	0.000576146	0.0157671	No	meth_hypo_RNA_up	Fatty acid 2-hydroxylase	0	0	XP_004233153.1	AT2G34770.1
Solyc02g036350	SL3.0ch02	31050613	31052613	+	1044	11317	791	12210	8.446	6.084	-2.36177	1.24085e-12	3.1998	10.0062	5.79835e-05	0.00263527	No	meth_hypo_RNA_up	1-aminocyclopropane-1-carboxylate oxidase EF501822	GO:0016491|GO:0055114	oxidoreductase activity | oxidation-reduction process	NP_001234638.1	AT1G05010.1
Solyc02g062550	SL3.0ch02	34822701	34824701	-	97	1656	66	1588	5.533	3.99	-1.54304	0.0202206	4.87623	3.75631	4.10414e-06	0.000317742	No	meth_hypo_RNA_up	P-loop containing nucleoside triphosphate hydrolases superfamily protein	GO:0005524	ATP binding	XP_004233533.1	AT3G50930.1
Solyc02g063350	SL3.0ch02	35958083	35960083	+	4297	5179	4605	5820	45.346	44.173	-1.17348	0.0485086	2.36667	2.5875	6.16804e-06	0.000436868	No	meth_hypo_RNA_up	Calcium binding protein	GO:0005509	calcium ion binding	XP_004233476.1	AT1G66400.1
Solyc02g063430	SL3.0ch02	36068580	36070580	-	1272	8706	1029	8135	12.748	11.229	-1.51932	0.000924669	4.55609	1.31676	2.50516e-05	0.00136934	No	meth_hypo_RNA_up	bHLH transcription factor 078	GO:0046983	protein dimerization activity	XP_004233470.1	AT5G65640.1
Solyc02g064830	SL3.0ch02	36526903	36528903	-	4086	7772	4391	9930	34.458	30.661	-3.79648	1.43944e-10	5.22383	2.77962	9.07726e-05	0.0036728	No	meth_hypo_RNA_up	Indole-3-acetic acid-amido synthetas 3-3	0	0	XP_004233446.1	AT2G14960.1
Solyc02g067610	SL3.0ch02	38314482	38316482	+	4027	7305	3682	7282	35.537	33.583	-1.9539	0.00157775	7.68018	1.50276	4.03356e-10	1.55132e-07	Yes	meth_hypo_RNA_up	LOW QUALITY:DNA helicase INO80-like protein	0	0	XP_025888665.1	0
Solyc02g067690	SL3.0ch02	38386602	38388602	-	2729	7378	1340	7563	27.001	15.051	-11.95	2.89573e-89	1.32873	6.19005	0.0001487	0.00541645	No	meth_hypo_RNA_up	Glycosyltransferase	GO:0008152|GO:0016758	metabolic process | transferase activity, transferring hexosyl groups	XP_004233334.1	AT2G16890.2
Solyc02g068680	SL3.0ch02	39190314	39192314	+	4075	8134	4621	10055	33.377	31.487	-1.89024	0.000760978	5.71481	5.02217	1.93785e-07	2.76975e-05	No	meth_hypo_RNA_up	LOW QUALITY:Cysteine/Histidine-rich C1 domain family protein	GO:0035556	intracellular signal transduction	XP_025884889.1	AT2G44380.1
Solyc02g070040	SL3.0ch02	40399824	40401824	-	111	615	47	580	15.289	7.496	-7.79324	9.25967e-06	2.4352	5.56717	6.78838e-07	7.54058e-05	No	meth_hypo_RNA_up	LOW QUALITY:Ethylene-responsive nuclear protein	0	0	XP_004233154.1	AT4G20880.1
Solyc02g070800	SL3.0ch02	40975015	40977015	-	140	278	278	737	33.493	27.389	-6.10366	0.0124289	2.60544	-0.0859586	0.000709733	0.0182763	No	meth_hypo_RNA_up	Thiamine monophosphate synthase	GO:0003824	catalytic activity	XP_004233104.1	0
Solyc02g071475	SL3.0ch02	41468731	41470731	-	808	1541	878	2277	34.398	27.829	-6.56877	2.65283e-07	5.0551	0.130541	0.00204641	0.0409144	No	meth_hypo_RNA_up	2-oxoglutarate (2OG) and Fe(II)-dependent oxygenase superfamily protein	GO:0016491|GO:0055114	oxidoreductase activity | oxidation-reduction process	XP_019067813.1	0
Solyc02g071620	SL3.0ch02	41582587	41584587	+	2468	4136	2295	4284	37.371	34.884	-2.48757	0.00213955	3.51163	3.60595	1.12527e-05	0.000716169	No	meth_hypo_RNA_up	GDSL-motif lipase/hydrolase family protein 1	GO:0016788	hydrolase activity, acting on ester bonds	XP_004233002.1	AT1G29670.1
Solyc02g072220	SL3.0ch02	42095833	42097833	+	1053	4485	991	5899	19.014	14.383	-4.63092	1.30059e-11	5.70069	1.1805	2.03166e-05	0.00115051	No	meth_hypo_RNA_up	LOW QUALITY:DUF1685 family protein	0	0	XP_010317343.1	AT2G42760.1
Solyc02g079220	SL3.0ch02	44384816	44386816	+	1447	5697	1183	5400	20.255	17.971	-2.28423	0.000545228	2.61928	3.97819	8.36808e-05	0.00345013	No	meth_hypo_RNA_up	Sugar transporter protein 1	GO:0016021|GO:0022857|GO:0055085	integral component of membrane | transmembrane transporter activity | transmembrane transport	NP_001234849.1	AT1G11260.1
Solyc02g079510	SL3.0ch02	44602184	44604184	-	880	7321	810	8348	10.73	8.845	-1.88567	3.13672e-05	2.93184	4.11047	0.00192698	0.0391969	No	meth_hypo_RNA_up	Peroxidase (AHRD V1 **** Q50LG4_TOBAC)%3B contains Interpro domain(s) IPR019793 Peroxidases heam-ligand binding site IPR019794 Peroxidase%2C active site	GO:0004601|GO:0055114	peroxidase activity | oxidation-reduction process	NP_001295320.1	AT5G05340.1
Solyc02g080010	SL3.0ch02	44919872	44921872	-	500	720	532	1212	40.984	30.505	-10.479	8.60195e-09	6.20519	3.88373	4.08914e-07	5.04346e-05	Yes	meth_hypo_RNA_up	Receptor-like protein kinase	GO:0004672|GO:0006468	protein kinase activity | protein phosphorylation	XP_010316619.1	AT4G05200.1
Solyc02g080020	SL3.0ch02	44921483	44923483	-	498	319	526	508	60.955	50.87	-10.0843	1.52693e-05	6.3506	-1.18058	7.38462e-05	0.00314819	Yes	meth_hypo_RNA_up	Receptor-like kinase	GO:0004672|GO:0006468	protein kinase activity | protein phosphorylation	XP_025885208.1	AT4G23270.1
Solyc02g080620	SL3.0ch02	45359170	45361170	+	6620	7933	7616	9550	45.489	44.367	-1.12213	0.0247706	5.0953	0.847284	8.57039e-05	0.00351947	Yes	meth_hypo_RNA_up	Arogenate dehydratase	GO:0008152|GO:0016597	metabolic process | amino acid binding	XP_004232706.1	AT1G11790.1
Solyc02g080830	SL3.0ch02	45504902	45506902	+	7415	6406	7772	7189	53.65	51.948	-1.70184	0.00264586	5.93336	2.27107	0.000361277	0.0108317	Yes	meth_hypo_RNA_up	F-box plant-like protein, putative	0	0	XP_004233789.1	AT4G04480.1
Solyc02g081030	SL3.0ch02	45651748	45653748	-	2684	7296	2690	7993	26.894	25.18	-1.71359	0.00343088	1.40641	6.36022	0.000132934	0.00496324	No	meth_hypo_RNA_up	ERD (early-responsive to dehydration stress) family protein	GO:0016020	membrane	XP_010316570.1	AT4G22120.1
Solyc02g082350	SL3.0ch02	46600115	46602115	+	1693	6553	1870	8237	20.531	18.502	-2.02914	0.00043702	1.35236	5.60411	1.58919e-05	0.000960172	No	meth_hypo_RNA_up	Leucine-rich repeat-containing protein, putative	GO:0005515	protein binding	XP_010316492.1	AT4G35470.1
Solyc02g082690	SL3.0ch02	46891147	46893147	+	3511	7528	3358	8324	31.805	28.745	-3.06034	6.84511e-07	1.47355	6.33639	0.00247882	0.046961	No	meth_hypo_RNA_up	Transducin/WD40 repeat protein	GO:0005515	protein binding	XP_004232566.1	AT4G35560.2
Solyc02g084117	SL3.0ch02	47879052	47881052	-	2651	4730	633	3617	35.917	14.894	-21.0224	1.62982e-136	6.28558	0.81211	6.87576e-05	0.00299187	No	meth_hypo_RNA_up	Cytochrome b561/ferric reductase transmembrane protein family	0	0	XP_004245857.2	0
Solyc02g084167	SL3.0ch02	47923766	47925766	-	453	3269	444	4357	12.171	9.248	-2.9228	1.44343e-05	4.38222	0.707905	6.58543e-05	0.00289577	No	meth_hypo_RNA_up	DNA mismatch repair protein mutL	0	0	XP_010316420.1	0
Solyc02g084330	SL3.0ch02	48003922	48005922	+	97	652	40	393	12.951	9.238	-3.71273	0.0309727	2.24724	2.28197	0.0002251	0.00751061	No	meth_hypo_RNA_up	decapping 5-like protein	0	0	XP_010322058.1	0
Solyc02g084890	SL3.0ch02	48590733	48592733	-	3265	2219	5257	5941	59.537	46.946	-12.591	1.84311e-51	9.87335	6.12622	2.38401e-29	8.52712e-26	No	meth_hypo_RNA_up	NBS-LRR disease resistance protein NBS50	GO:0043531	ADP binding	XP_004232433.1	AT3G50950.2
Solyc02g085290	SL3.0ch02	48874960	48876960	-	675	1722	207	794	28.16	20.679	-7.48088	5.76687e-06	2.50124	2.33383	0.000140784	0.00519982	No	meth_hypo_RNA_up	Maf protein, putative	GO:0047429	nucleoside-triphosphate diphosphatase activity	XP_004232406.1	AT5G66550.1
Solyc02g085390	SL3.0ch02	48955689	48957689	-	1272	2352	1434	3497	35.099	29.081	-6.01802	6.90431e-09	3.17901	1.68935	0.000108582	0.00418959	Yes	meth_hypo_RNA_up	chromatin remodeling 1	GO:0005524	ATP binding	XP_004232396.1	AT5G66750.1
Solyc02g085590	SL3.0ch02	49058482	49060482	-	2467	5869	2736	7533	29.595	26.643	-2.95123	9.13355e-06	6.89486	0.494518	5.36868e-06	0.000397228	No	meth_hypo_RNA_up	BAC19.13	GO:0045735	nutrient reservoir activity	XP_004233717.1	AT2G18540.1
Solyc02g085600	SL3.0ch02	49065312	49067312	+	1052	2642	1221	4462	28.479	21.485	-6.99348	5.20763e-14	1.86544	6.14515	1.21816e-07	1.88619e-05	Yes	meth_hypo_RNA_up	Transcription factor GRAS	0	0	XP_004232383.1	AT4G36710.1
Solyc02g086300	SL3.0ch02	49634492	49636492	-	4775	4765	4119	4743	50.052	46.479	-3.57306	1.56923e-06	2.35535	7.86608	0.000208299	0.00704867	No	meth_hypo_RNA_up	Class I glutamine amidotransferase-like superfamily protein	GO:0006541|GO:0016787	glutamine metabolic process | hydrolase activity	XP_004232334.1	AT5G38200.1
Solyc02g086770	SL3.0ch02	50023849	50025849	-	10197	7531	10319	7973	57.519	56.413	-1.10654	0.0189172	3.95661	0.893896	0.00147807	0.0319057	Yes	meth_hypo_RNA_up	Cinnamoyl-CoA reductase	GO:0003854|GO:0006694|GO:0016616|GO:0055114	3-beta-hydroxy-delta5-steroid dehydrogenase activity | steroid biosynthetic process | oxidoreductase activity, acting on the CH-OH group of donors, NAD or NADP as acceptor | oxidation-reduction process	XP_004232300.1	AT5G14700.1
Solyc02g087540	SL3.0ch02	50584938	50586938	-	2799	6233	2155	5647	30.99	27.621	-3.36869	2.07285e-06	2.75213	7.63563	5.22144e-05	0.00242715	No	meth_hypo_RNA_up	P-loop containing nucleoside triphosphate hydrolases superfamily protein	GO:0005524	ATP binding	XP_004233689.1	AT3G28510.1
Solyc02g087710	SL3.0ch02	50673482	50675482	-	14	445	1	387	3.05	0.258	-2.79238	0.00177042	1.39112	6.87383	0.000276193	0.00886794	Yes	meth_hypo_RNA_up	FACT complex subunit SSRP1	GO:0003677|GO:0005634	DNA binding | nucleus	XP_004232241.1	AT3G28730.1
Solyc02g087840	SL3.0ch02	50737235	50739235	-	2031	6255	1981	8621	24.511	18.685	-5.82607	2.49559e-21	2.5809	5.74442	1.07467e-05	0.000692589	No	meth_hypo_RNA_up	Homeobox associated leucine zipper protein	GO:0006355|GO:0043565	regulation of transcription, DNA-templated | sequence-specific DNA binding	XP_004232228.2	AT1G69780.1
Solyc02g088100	SL3.0ch02	50928715	50930715	-	5230	5403	5046	5549	49.186	47.626	-1.56026	0.0134343	2.45556	7.19672	3.94267e-06	0.000309369	No	meth_hypo_RNA_up	expansin precursor 5	GO:0009664	plant-type cell wall organization	NP_001234085.1	AT2G03090.1
Solyc02g088380	SL3.0ch02	51120148	51122148	-	913	5836	867	6877	13.528	11.196	-2.33217	2.23975e-05	2.0071	5.80474	2.78221e-05	0.00148307	No	meth_hypo_RNA_up	Early nodulin-like protein	GO:0009055	electron transfer activity	XP_004232194.1	AT2G27035.1
Solyc02g089680	SL3.0ch02	52069656	52071656	+	6063	8925	6872	10558	40.452	39.426	-1.02609	0.0315557	1.4489	6.37355	0.00192255	0.0391969	No	meth_hypo_RNA_up	Trichome birefringence-like 19	0	0	XP_004232107.1	AT5G15900.1
Solyc02g089900	SL3.0ch02	52219758	52221758	+	517	3750	419	4209	12.116	9.054	-3.06265	3.38471e-06	2.67378	6.34498	3.29715e-06	0.000266213	No	meth_hypo_RNA_up	Kinase family protein	GO:0004672|GO:0005524|GO:0006468	protein kinase activity | ATP binding | protein phosphorylation	XP_004232089.1	AT2G23770.1
Solyc02g089990	SL3.0ch02	52315398	52317398	-	1715	5740	1826	6947	23.005	20.814	-2.19083	0.000603705	1.4415	5.08522	0.00189973	0.0389172	No	meth_hypo_RNA_up	HTH-type transcriptional regulator	0	0	XP_004232083.1	AT2G23690.1
Solyc02g090400	SL3.0ch02	52599856	52601856	+	4751	8396	5153	10250	36.138	33.455	-2.683	2.52296e-06	3.3809	3.02589	3.37437e-06	0.000271835	No	meth_hypo_RNA_up	Two-component response regulator	GO:0003677	DNA binding	XP_004233639.1	AT4G37180.2
Solyc02g090430	SL3.0ch02	52625877	52627877	+	3857	8025	3712	8922	32.461	29.381	-3.07983	2.52909e-07	5.80998	1.3315	2.09881e-06	0.000188146	No	meth_hypo_RNA_up	MAP kinase kinase kinase 20	GO:0005524	ATP binding	XP_010316155.1	AT5G66850.1
Solyc02g091250	SL3.0ch02	53248544	53250544	-	8814	8323	10307	10297	51.433	50.024	-1.40831	0.00420494	1.73029	4.90896	0.000346327	0.0105335	Yes	meth_hypo_RNA_up	LOW QUALITY:mediator of RNA polymerase II transcription subunit	0	0	XP_010317275.1	AT2G01300.1
Solyc02g091990	SL3.0ch02	53847973	53849973	-	64	849	45	1329	7.01	3.275	-3.73475	5.01133e-05	5.1814	2.25261	0.00058877	0.0159781	No	meth_hypo_RNA_up	1-aminocyclopropane-1-carboxylate synthase 3	GO:0009058|GO:0030170	biosynthetic process | pyridoxal phosphate binding	NP_001234026.2	AT4G37770.1
Solyc02g092220	SL3.0ch02	54007251	54009251	+	290	1958	267	2384	12.9	10.072	-2.82868	0.00149403	2.46974	1.67241	0.00205948	0.041061	No	meth_hypo_RNA_up	Flavin-binding monooxygenase family protein	0	0	XP_019066879.2	0
Solyc02g092580	SL3.0ch02	54266995	54268995	-	7390	7593	7992	8590	49.323	48.197	-1.12573	0.024666	6.43809	3.58398	3.58146e-05	0.00180407	No	meth_hypo_RNA_up	Peroxidase	GO:0004601|GO:0055114	peroxidase activity | oxidation-reduction process	XP_004231908.1	AT4G37530.1
Solyc02g092750	SL3.0ch02	54352117	54354117	+	667	1848	591	2128	26.521	21.736	-4.78494	5.47153e-05	1.84657	5.40427	0.000847209	0.0207271	No	meth_hypo_RNA_up	Protein phosphatase 2C family protein	GO:0043169	cation binding	XP_004231895.1	AT4G33920.1
Solyc02g092790	SL3.0ch02	54397305	54399305	+	2042	3690	2415	5031	35.625	32.434	-3.19104	0.000114198	2.25464	8.65706	2.84923e-05	0.00151204	No	meth_hypo_RNA_up	Arabinogalactan 1	0	0	NP_001234443.1	0
Solyc02g093230	SL3.0ch02	54801957	54803957	-	6978	7015	7382	7961	49.868	48.113	-1.75464	0.00191155	3.36633	3.56847	2.69345e-05	0.00144702	No	meth_hypo_RNA_up	Caffeoyl-CoA O-methyltransferase	GO:0008171	O-methyltransferase activity	XP_004231857.1	AT4G34050.1
Solyc02g093270	SL3.0ch02	54817854	54819854	-	6000	10406	6267	11855	36.572	34.582	-1.98971	0.000103976	3.85132	4.37363	0.00102605	0.023971	No	meth_hypo_RNA_up	caffeoyl-CoA O-methyltransferase	GO:0008171	O-methyltransferase activity	NP_001307032.1	AT4G34050.1
Solyc02g094270	SL3.0ch02	55487767	55489767	-	3805	5088	3916	5812	42.786	40.255	-2.53153	0.000371456	8.91346	0.494776	0.000615201	0.0165323	No	meth_hypo_RNA_up	WRKY transcription factor	GO:0003700|GO:0006355|GO:0043565	DNA-binding transcription factor activity | regulation of transcription, DNA-templated | sequence-specific DNA binding	XP_004233585.1	AT5G13080.1
Solyc03g005227	SL3.0ch03	130196	132196	-	4257	5516	4062	6698	43.559	37.751	-5.80786	1.17559e-16	1.42722	6.08809	2.69435e-05	0.00144702	No	meth_hypo_RNA_up	Histone H2A	GO:0046982	protein heterodimerization activity	XP_004234016.1	0
Solyc03g006700	SL3.0ch03	1262519	1264519	-	5156	4224	5837	5055	54.968	53.59	-1.37823	0.0270841	7.74497	-1.44367	0.00208506	0.0414091	Yes	meth_hypo_RNA_up	Peroxidase	GO:0004601|GO:0055114	peroxidase activity | oxidation-reduction process	XP_004234138.1	AT5G05340.1
Solyc03g007710	SL3.0ch03	2243901	2245901	-	7042	7822	8249	10919	47.376	43.035	-4.34094	5.37617e-15	4.51941	2.63052	1.25391e-06	0.000124583	No	meth_hypo_RNA_up	Membrane-associated kinase regulator, putative	0	0	XP_004234282.1	AT5G52870.1
Solyc03g008010	SL3.0ch03	2478371	2480371	-	1840	6253	1772	6701	22.736	20.913	-1.82221	0.00314431	1.85034	6.08656	4.34154e-05	0.00211853	No	meth_hypo_RNA_up	PPPDE putative thiol peptidase family protein	0	0	XP_004234227.1	AT4G25660.1
Solyc03g025670	SL3.0ch03	3134384	3136384	+	5336	9585	4661	9888	35.762	32.037	-3.72511	3.5846e-11	7.00993	3.18638	0.000156267	0.00562875	Yes	meth_hypo_RNA_up	PAR1 protein	0	0	XP_004234399.1	AT5G52390.1
Solyc03g026270	SL3.0ch03	3735394	3737394	+	6940	7834	8006	9520	46.974	45.681	-1.29371	0.0118559	5.26345	5.3492	2.56913e-11	1.43582e-08	No	meth_hypo_RNA_up	CBF	GO:0003700|GO:0006355	DNA-binding transcription factor activity | regulation of transcription, DNA-templated	XP_019068359.1	AT4G25470.1
Solyc03g033510	SL3.0ch03	5075300	5077300	-	4702	6487	5406	8315	42.023	39.399	-2.62396	2.74563e-05	1.55413	3.63872	0.000515485	0.0144046	Yes	meth_hypo_RNA_up	Armadillo repeat only	GO:0005515	protein binding	XP_004234534.1	AT5G66200.1
Solyc03g034250	SL3.0ch03	5976870	5978870	-	2804	7611	2046	7186	26.923	22.162	-4.76066	3.55237e-14	1.944	4.72737	5.34092e-05	0.00246676	No	meth_hypo_RNA_up	peptidase M50B-like protein	0	0	XP_004234571.1	AT1G67060.1
Solyc03g044220	SL3.0ch03	8502214	8504214	+	223	2058	291	3144	9.776	8.472	-1.3048	0.0487714	2.27877	3.93613	1.18266e-05	0.000746059	No	meth_hypo_RNA_up	F-box protein	GO:0005515	protein binding	XP_004234661.1	AT5G67250.1
Solyc03g045140	SL3.0ch03	11652595	11654595	-	3481	11160	3607	12271	23.776	22.717	-1.05873	0.0162645	5.58833	2.15272	2.59836e-10	1.1064e-07	No	meth_hypo_RNA_up	Cyclopropane-fatty-acyl-phospholipid synthase	GO:0016491|GO:0055114	oxidoreductase activity | oxidation-reduction process	XP_004234691.1	AT3G23530.1
Solyc03g059260	SL3.0ch03	30412018	30414018	-	4518	8221	5298	10101	35.466	34.405	-1.06106	0.0335045	1.48448	6.6525	0.00217046	0.0426321	No	meth_hypo_RNA_up	Carboxyl-terminal-processing protease	GO:0006508|GO:0008236	proteolysis | serine-type peptidase activity	XP_019068415.1	AT3G57680.1
Solyc03g080120	SL3.0ch03	53450566	53452566	+	3314	5920	3386	7102	35.889	32.285	-3.60459	1.48143e-07	3.8314	0.744526	0.00130142	0.0288231	No	meth_hypo_RNA_up	LOW QUALITY:holocarboxylase synthetase 2	0	0	XP_004233447.1	0
Solyc03g081330	SL3.0ch03	53624978	53626978	-	1489	7948	1531	9597	15.778	13.758	-2.02023	4.39835e-05	2.92087	4.88727	2.30224e-06	0.000200356	No	meth_hypo_RNA_up	LOW QUALITY:Avr9/Cf-9 rapidly elicited protein 65	0	0	XP_004235018.1	0
Solyc03g083690	SL3.0ch03	55076029	55078029	+	4534	9420	5007	10923	32.492	31.431	-1.06121	0.0270006	8.9594	-0.425621	0.00011895	0.00452136	No	meth_hypo_RNA_up	LOW QUALITY:RNA-dependent RNA polymerase	0	0	XP_010313217.1	0
Solyc03g083730	SL3.0ch03	55096268	55098268	+	1315	6411	911	6887	17.02	11.682	-5.33797	1.22712e-20	5.94897	3.6795	2.54356e-06	0.000217651	No	meth_hypo_RNA_up	Plant invertase/pectin methylesterase inhibitor superfamily protein	GO:0004857	enzyme inhibitor activity	XP_004234935.1	AT5G62360.1
Solyc03g097100	SL3.0ch03	60876905	60878905	+	6347	6261	7338	8083	50.341	47.584	-2.75659	5.01864e-06	1.7526	3.37504	0.000244238	0.00802932	Yes	meth_hypo_RNA_up	Calmodulin, putative	GO:0005509	calcium ion binding	XP_004235353.1	AT3G03000.1
Solyc03g020050	SL3.0ch03	62636144	62638144	+	501	5272	347	6343	8.678	5.187	-3.49148	4.27304e-14	4.07391	1.3654	0.00252901	0.0477098	No	meth_hypo_RNA_up	VIROID-INDUCIBLE PROTEINASE INHIBITOR II	GO:0004867	serine-type endopeptidase inhibitor activity	NP_001234246.2	0
Solyc03g019760	SL3.0ch03	62862460	62864460	+	1952	10880	1403	11350	15.212	11.001	-4.21064	1.27154e-22	1.60131	5.48347	0.0019229	0.0391969	No	meth_hypo_RNA_up	ABC transporter G family member	GO:0016020	membrane	XP_004234313.1	AT1G17840.1
Solyc03g111280	SL3.0ch03	63386108	63388108	-	1448	4090	1360	5144	26.147	20.91	-5.23641	3.4378e-11	8.43799	1.46154	2.91928e-05	0.00153554	No	meth_hypo_RNA_up	Cytochrome P450, putative	GO:0005506|GO:0016705|GO:0020037|GO:0055114	iron ion binding | oxidoreductase activity, acting on paired donors, with incorporation or reduction of molecular oxygen | heme binding | oxidation-reduction process	XP_004236553.1	AT3G48520.1
Solyc03g111290	SL3.0ch03	63391525	63393525	-	411	4468	212	3633	8.424	5.514	-2.9102	1.73899e-07	11.3	2.31955	1.61234e-05	0.000969249	No	meth_hypo_RNA_up	Cytochrome P450, putative	GO:0005506|GO:0016705|GO:0020037|GO:0055114	iron ion binding | oxidoreductase activity, acting on paired donors, with incorporation or reduction of molecular oxygen | heme binding | oxidation-reduction process	XP_004236333.1	AT3G48520.1
Solyc03g111710	SL3.0ch03	63853416	63855416	+	3999	7060	4203	8907	36.161	32.059	-4.1011	4.92602e-11	2.46481	5.71751	2.50914e-05	0.00136934	No	meth_hypo_RNA_up	BTB/POZ and TAZ domain protein	GO:0005515	protein binding	XP_004236301.1	AT5G63160.1
Solyc03g111770	SL3.0ch03	63888314	63890314	-	8073	8101	8685	9912	49.913	46.701	-3.21236	4.19516e-09	1.24167	4.81981	0.000180231	0.0062954	Yes	meth_hypo_RNA_up	Alpha/beta-Hydrolases superfamily protein	0	0	XP_004236297.1	AT4G24760.1
Solyc03g113060	SL3.0ch03	64844286	64846286	-	4795	7796	4577	8720	38.083	34.421	-3.66146	1.76364e-09	1.36944	5.02279	1.87553e-05	0.0010855	No	meth_hypo_RNA_up	ABC transporter A family protein	GO:0005524|GO:0016887	ATP binding | ATPase activity	XP_004236199.1	AT3G47780.1
Solyc03g114160	SL3.0ch03	65658931	65660931	+	505	4118	425	4864	10.924	8.036	-2.8881	1.14446e-06	1.93089	4.611	0.000571389	0.0156489	No	meth_hypo_RNA_up	U-box domain-containing protein 19, putative	GO:0005515	protein binding	XP_004236118.1	AT1G60190.1
Solyc03g114730	SL3.0ch03	66122133	66124133	-	3774	7772	4745	10690	32.687	30.742	-1.94482	0.000541773	2.0121	5.49253	0.0001447	0.00531379	No	meth_hypo_RNA_up	O-fucosyltransferase family protein	0	0	XP_004236078.1	AT5G15740.1
Solyc03g114970	SL3.0ch03	66320228	66322228	-	11350	7117	12112	7883	61.461	60.575	-0.885841	0.0383832	2.12444	6.74945	2.21532e-06	0.000195135	No	meth_hypo_RNA_up	SPIRAL1-like1	0	0	XP_004236061.1	AT1G26355.1
Solyc03g116890	SL3.0ch03	67626540	67628540	-	1970	4254	1883	4848	31.652	27.975	-3.67663	5.69369e-06	4.71241	6.96075	5.31072e-08	9.54542e-06	No	meth_hypo_RNA_up	WRKY transcription factor 39	GO:0003700|GO:0006355|GO:0043565	DNA-binding transcription factor activity | regulation of transcription, DNA-templated | sequence-specific DNA binding	NP_001303844.1	AT1G80840.1
Solyc03g117980	SL3.0ch03	68454980	68456980	+	4790	9971	4495	10634	32.45	29.711	-2.73923	4.23297e-07	2.9952	7.41714	1.85972e-05	0.0010781	No	meth_hypo_RNA_up	whitefly-induced gp91-phox	GO:0016491|GO:0055114	oxidoreductase activity | oxidation-reduction process	NP_001234271.2	AT5G47910.1
Solyc03g118450	SL3.0ch03	68809196	68811196	-	1141	4138	259	2746	21.614	8.619	-12.995	6.38173e-55	4.54996	2.54199	0.00022867	0.00758726	No	meth_hypo_RNA_up	LOW QUALITY:P-loop containing nucleoside triphosphate hydrolases superfamily protein	0	0	XP_010319387.1	0
Solyc03g118970	SL3.0ch03	69200063	69202063	-	6156	9780	6755	11340	38.63	37.331	-1.29876	0.00830596	2.65949	5.94521	0.000148858	0.00541645	No	meth_hypo_RNA_up	Protein DETOXIFICATION	GO:0006855|GO:0015238|GO:0015297|GO:0016020|GO:0055085	drug transmembrane transport | antiporter activity | membrane | transmembrane transport	XP_004235767.1	AT5G52450.1
Solyc03g119250	SL3.0ch03	69377163	69379163	-	2911	9340	3041	10294	23.761	22.805	-0.956676	0.0363135	2.08618	7.81306	0.000410938	0.012035	No	meth_hypo_RNA_up	Calmodulin binding protein-like, putative	GO:0005516|GO:0006950	calmodulin binding | response to stress	XP_004235786.1	AT1G73805.1
Solyc03g119810	SL3.0ch03	69870213	69872213	+	721	6609	595	7151	9.836	7.681	-2.15491	3.31959e-06	6.31718	-0.237285	6.03833e-09	1.61178e-06	No	meth_hypo_RNA_up	LOW QUALITY:Transmembrane protein, putative	0	0	XP_004235734.1	AT1G49000.1
Solyc03g120890	SL3.0ch03	70608822	70610822	-	3264	11609	981	10560	21.946	8.5	-13.4457	2.29867e-200	1.81107	2.43611	0.00203599	0.0407517	No	meth_hypo_RNA_up	GATA transcription factor	GO:0006355|GO:0008270	regulation of transcription, DNA-templated | zinc ion binding	XP_004235652.1	AT5G25830.1
Solyc03g122190	SL3.0ch03	71589220	71591220	-	6121	5884	7385	8460	50.987	46.608	-4.37933	1.23971e-12	3.27893	6.83823	1.62619e-05	0.000972487	No	meth_hypo_RNA_up	Jasmonate zim-domain protein	0	0	NP_001234223.1	AT1G74950.1
Solyc03g122360	SL3.0ch03	71713726	71715726	+	2261	3168	1965	3595	41.647	35.342	-6.30499	2.70435e-11	2.72578	4.39468	3.09572e-05	0.00161141	Yes	meth_hypo_RNA_up	Cytochrome P450	GO:0016705|GO:0055114	oxidoreductase activity, acting on paired donors, with incorporation or reduction of molecular oxygen | oxidation-reduction process	XP_004235547.1	AT5G07990.1
Solyc03g123620	SL3.0ch03	71925144	71927144	-	3135	7987	3074	8502	28.187	26.555	-1.63244	0.00381175	4.68295	5.60541	9.7894e-07	0.000101787	No	meth_hypo_RNA_up	Pectinesterase	GO:0005618|GO:0030599|GO:0042545	cell wall | pectinesterase activity | cell wall modification	XP_004235526.1	AT1G53840.1
Solyc03g123830	SL3.0ch03	72041254	72043254	+	4318	6993	3877	7408	38.175	34.355	-3.81989	4.36402e-09	2.00637	7.43012	1.42377e-11	8.48755e-09	Yes	meth_hypo_RNA_up	D-3-phosphoglycerate dehydrogenase	GO:0051287|GO:0055114	NAD binding | oxidation-reduction process	NP_001335290.1	AT1G17745.2
Solyc04g005040	SL3.0ch04	42947	44947	+	3906	6468	3140	7132	37.652	30.569	-7.08329	6.33872e-26	5.53116	6.49993	1.66319e-10	7.39845e-08	No	meth_hypo_RNA_up	Matrix metalloproteinase	GO:0008237|GO:0008270	metallopeptidase activity | zinc ion binding	NP_001307786.1	AT1G24140.1
Solyc04g005380	SL3.0ch04	268776	270776	+	2452	3207	1369	2600	43.329	34.492	-8.83689	1.03927e-17	3.67475	1.56754	0.0011662	0.0265179	No	meth_hypo_RNA_up	Ninja-family protein AFP1-like protein	GO:0007165	signal transduction	XP_004237223.1	AT1G69260.1
Solyc04g005770	SL3.0ch04	490121	492121	+	3090	4498	2805	4490	40.722	38.451	-2.2712	0.0032082	5.62782	-0.643331	0.000802388	0.0199028	Yes	meth_hypo_RNA_up	Pentatricopeptide repeat (PPR) superfamily protein, putative	GO:0005515	protein binding	XP_010319443.1	AT2G02750.1
Solyc04g007250	SL3.0ch04	975142	977142	-	583	3462	503	3382	14.413	12.947	-1.46562	0.0304451	2.48081	2.74131	0.00070495	0.0182055	No	meth_hypo_RNA_up	LOW QUALITY:Transmembrane protein, putative	0	0	XP_010319421.1	AT1G25400.1
Solyc04g007530	SL3.0ch04	1224749	1226749	-	4906	9255	5133	10273	34.644	33.318	-1.32626	0.00977854	2.01948	1.75427	8.1565e-05	0.0033884	Yes	meth_hypo_RNA_up	Protein DETOXIFICATION	GO:0006855|GO:0015238|GO:0015297|GO:0016020|GO:0055085	drug transmembrane transport | antiporter activity | membrane | transmembrane transport	XP_004236983.1	AT1G71140.1
Solyc04g007900	SL3.0ch04	1570328	1572328	+	2841	10352	3130	12732	21.534	19.733	-1.80145	0.00013736	2.41453	5.74345	1.51006e-08	3.19597e-06	No	meth_hypo_RNA_up	Plant cadmium resistance 2, putative	0	0	XP_004236941.1	AT1G14870.1
Solyc04g008050	SL3.0ch04	1705795	1707795	+	1384	4442	786	3339	23.756	19.055	-4.70103	3.39493e-08	1.02791	4.61809	0.00127629	0.0284426	No	meth_hypo_RNA_up	Two-component response regulator	GO:0003677	DNA binding	XP_010319384.1	AT3G16857.2
Solyc04g008100	SL3.0ch04	1759176	1761176	-	877	9967	685	9088	8.087	7.009	-1.07831	0.00252059	4.30687	5.96419	1.15693e-06	0.000115914	No	meth_hypo_RNA_up	U-box domain-containing protein	GO:0005488	binding	XP_004236923.1	AT5G37490.1
Solyc04g008210	SL3.0ch04	1892066	1894066	+	9771	10278	10489	11830	48.736	46.996	-1.73976	0.000285223	1.48827	4.08445	0.000308653	0.00960827	No	meth_hypo_RNA_up	ETAG-A3	GO:0010411|GO:0016762|GO:0042546	xyloglucan metabolic process | xyloglucan:xyloglucosyl transferase activity | cell wall biogenesis	NP_001296719.1	AT2G01850.1
Solyc04g008600	SL3.0ch04	2200551	2202551	+	5645	5028	6155	6076	52.89	50.323	-2.56752	9.66855e-05	7.14008	-0.0143923	0.000184883	0.00641407	No	meth_hypo_RNA_up	Zinc knuckle family protein	GO:0005634|GO:0006974|GO:0007049|GO:0048478	nucleus | cellular response to DNA damage stimulus | cell cycle | replication fork protection	XP_004236889.1	AT3G02820.1
Solyc04g008820	SL3.0ch04	2433403	2435403	+	1044	2834	1104	3485	26.921	24.058	-2.86356	0.00182764	3.7175	3.14495	4.79748e-05	0.00225785	No	meth_hypo_RNA_up	High mobility group protein	0	0	XP_004236870.1	AT5G23420.1
Solyc04g009820	SL3.0ch04	3136929	3138929	+	5539	7379	6322	9353	42.878	40.332	-2.54642	1.46112e-05	7.57138	1.42408	7.21512e-09	1.84336e-06	No	meth_hypo_RNA_up	GRF1-interacting factor-like protein	GO:0003713	transcription coactivator activity	XP_004236799.1	AT5G28640.1
Solyc04g010200	SL3.0ch04	3518738	3520738	+	6440	7992	7173	9625	44.623	42.702	-1.92155	0.000502994	3.46448	0.375948	5.9657e-05	0.00268404	No	meth_hypo_RNA_up	ABC transporter G family member	GO:0016020	membrane	XP_004236771.1	AT5G13580.1
Solyc04g010210	SL3.0ch04	3528223	3530223	-	4141	5765	3062	5338	41.803	36.452	-5.35057	4.5861e-13	8.17259	-1.27165	1.47912e-05	0.0008967	Yes	meth_hypo_RNA_up	ABC transporter G family member	GO:0016020	membrane	XP_004236770.1	AT2G39350.1
Solyc04g015360	SL3.0ch04	5566899	5568899	-	4097	10215	3866	11405	28.626	25.316	-3.31037	3.19159e-10	2.42563	7.06019	0.00018842	0.00651781	No	meth_hypo_RNA_up	GATA transcription factor	GO:0006355|GO:0008270	regulation of transcription, DNA-templated | zinc ion binding	XP_004236632.1	AT3G54810.2
Solyc04g040130	SL3.0ch04	12034163	12036163	+	2454	9060	1891	10316	21.313	15.491	-5.82207	5.59433e-30	12.8843	3.69339	1.03783e-07	1.66061e-05	No	meth_hypo_RNA_up	Fatty acid desaturase	GO:0016717|GO:0055114	oxidoreductase activity, acting on paired donors, with oxidation of a pair of donors resulting in the reduction of molecular oxygen to two molecules of water | oxidation-reduction process	XP_025886451.1	AT3G12120.1
Solyc04g045530	SL3.0ch04	33658370	33660370	+	6740	5857	6309	6924	53.505	47.676	-5.82854	4.41325e-20	2.14834	1.77521	0.00210619	0.0417596	No	meth_hypo_RNA_up	DNA primase large subunit	GO:0016779	nucleotidyltransferase activity	XP_004237566.1	AT1G67320.3
Solyc04g045600	SL3.0ch04	34213972	34215972	-	5700	6922	5580	7136	45.159	43.882	-1.27752	0.0226435	3.05903	2.97151	1.33894e-05	0.000827138	Yes	meth_hypo_RNA_up	Protein kinase family protein	GO:0005524	ATP binding	XP_019069077.1	AT4G32000.2
Solyc04g049150	SL3.0ch04	39841280	39843280	+	1681	4753	1230	4599	26.127	21.101	-5.02544	1.43981e-10	2.25119	3.68588	3.02153e-06	0.000250752	No	meth_hypo_RNA_up	Transducin/WD40 repeat-like superfamily protein	0	0	XP_019068448.1	0
Solyc04g051580	SL3.0ch04	50818745	50820745	-	7080	5539	6574	5855	56.106	52.892	-3.21344	4.48794e-07	1.61843	3.41026	3.29863e-05	0.0016831	Yes	meth_hypo_RNA_up	(DB244) meloidogyne-induced giant cell protein	GO:0055085	transmembrane transport	XP_010319792.1	AT4G39460.1
Solyc04g053120	SL3.0ch04	51659834	51661834	-	5324	8229	5959	9607	39.283	38.282	-1.00066	0.0416553	1.09965	5.98056	0.000786141	0.0196422	Yes	meth_hypo_RNA_up	4-alpha-glucanotransferase	GO:0005975	carbohydrate metabolic process	XP_004237445.1	AT5G64860.1
Solyc04g055170	SL3.0ch04	53729476	53731476	-	7495	8881	8730	11304	45.768	43.576	-2.19228	2.78515e-05	1.97877	1.54176	0.000467818	0.013333	No	meth_hypo_RNA_up	annexin p35	GO:0005509|GO:0005544	calcium ion binding | calcium-dependent phospholipid binding	NP_001234101.2	AT5G65020.1
Solyc04g064470	SL3.0ch04	55618649	55620649	-	1643	9380	1407	9430	14.905	12.983	-1.9219	3.94749e-05	2.56013	2.61853	0.000217892	0.00731102	Yes	meth_hypo_RNA_up	Squamosa promoter-binding-like protein	GO:0003677|GO:0005634	DNA binding | nucleus	XP_025887527.1	AT1G75270.1
Solyc04g064620	SL3.0ch04	55807338	55809338	-	10383	8482	12263	10646	55.038	53.529	-1.50925	0.00147328	3.4295	4.3416	0.00039702	0.011707	Yes	meth_hypo_RNA_up	Bidirectional sugar transporter SWEET	GO:0016021	integral component of membrane	XP_004237723.1	AT1G21460.1
Solyc04g064880	SL3.0ch04	56048828	56050828	+	3906	6137	4229	6966	38.893	37.776	-1.11697	0.0474136	5.42043	5.08085	0.00114973	0.0262267	No	meth_hypo_RNA_up	Pathogen-related protein	0	0	XP_004237745.1	AT1G78780.2
Solyc04g071075	SL3.0ch04	58069018	58071018	-	1547	5889	1302	6663	20.804	16.347	-4.45768	3.09651e-12	10.1629	0.531708	2.00195e-05	0.00113841	No	meth_hypo_RNA_up	Auxin efflux carrier family protein	0	0	NP_001305147.1	0
Solyc04g071620	SL3.0ch04	58668998	58670998	+	2200	6343	2803	9120	25.752	23.509	-2.24289	0.000209209	2.58558	2.90584	2.74748e-05	0.00146894	No	meth_hypo_RNA_up	Abscicic acid stress ripening 4	GO:0006950	response to stress	NP_001269248.1	0
Solyc04g071615	SL3.0ch04	58669443	58671443	+	1849	5021	2424	7690	26.914	23.967	-2.94734	1.57043e-05	2.45858	3.97952	6.42468e-05	0.00284201	No	meth_hypo_RNA_up	ASR4	GO:0006950	response to stress	NP_001269248.1	0
Solyc04g071890	SL3.0ch04	58997060	58999060	+	3626	9843	3791	11633	26.921	24.579	-2.3425	6.30797e-06	5.73528	6.17168	1.11626e-07	1.75116e-05	No	meth_hypo_RNA_up	Peroxidase	GO:0004601|GO:0055114	peroxidase activity | oxidation-reduction process	NP_001334411.1	AT1G71695.1
Solyc04g071970	SL3.0ch04	59068731	59070731	-	5992	11319	5662	11931	34.614	32.183	-2.43057	1.80303e-06	1.31961	4.44286	0.000230355	0.0076361	Yes	meth_hypo_RNA_up	NAD(P)-binding Rossmann-fold superfamily protein	0	0	XP_004237829.1	AT1G22790.1
Solyc04g072000	SL3.0ch04	59153998	59155998	-	3173	9448	3207	10233	25.141	23.862	-1.27903	0.00988439	7.19613	0.935755	0.00197021	0.0397016	No	meth_hypo_RNA_up	Chitinase	GO:0008061	chitin binding	XP_004237833.1	AT3G54420.1
Solyc04g072900	SL3.0ch04	59951855	59953855	+	485	10499	332	9612	4.416	3.339	-1.07682	5.67135e-05	1.37158	7.49235	3.87015e-05	0.0019226	Yes	meth_hypo_RNA_up	dehydration-responsive element binding protein 3	GO:0003700|GO:0006355	DNA-binding transcription factor activity | regulation of transcription, DNA-templated	NP_001234707.1	AT1G78080.1
Solyc04g074020	SL3.0ch04	60121462	60123462	-	7521	7351	7057	7297	50.572	49.164	-1.40755	0.0097369	6.68847	1.55259	3.06453e-06	0.000252562	Yes	meth_hypo_RNA_up	Receptor protein kinase, putative	GO:0005515	protein binding	XP_010320167.1	AT4G08850.1
Solyc04g074270	SL3.0ch04	60352392	60354392	+	4536	9844	4918	11685	31.544	29.621	-1.92266	0.000209244	1.31505	6.41172	0.0025179	0.0475591	No	meth_hypo_RNA_up	Leucine-rich repeat-containing protein	GO:0005515	protein binding	XP_004237919.1	AT1G78230.1
Solyc04g074420	SL3.0ch04	60517631	60519631	-	75	1123	6	718	6.26	0.829	-5.4317	5.44375e-10	2.30779	5.32553	2.16601e-05	0.00121044	Yes	meth_hypo_RNA_up	Phosphate-responsive 1 family protein	0	0	XP_004253500.2	AT4G08950.1
Solyc04g074430	SL3.0ch04	60518247	60520247	-	58	691	3	404	7.744	0.737	-7.00656	2.99853e-08	2.19168	6.72953	6.87104e-05	0.00299187	No	meth_hypo_RNA_up	Phosphate-responsive 1 family protein	0	0	XP_004253500.2	AT4G08950.1
Solyc04g074730	SL3.0ch04	60750618	60752618	+	1820	5376	1872	6136	25.292	23.377	-1.91521	0.00390583	1.57924	7.90601	2.91151e-05	0.00153371	No	meth_hypo_RNA_up	Arabinogalactan-protein	0	0	XP_004237948.1	0
Solyc04g074770	SL3.0ch04	60779392	60781392	-	951	4318	868	4808	18.049	15.292	-2.75651	0.000101922	8.68625	0.219431	0.000447796	0.0128237	No	meth_hypo_RNA_up	Phage capsid scaffolding protein (GPO) serine peptidase	0	0	XP_019069179.1	0
Solyc04g076730	SL3.0ch04	61715231	61717231	+	756	3487	677	4463	17.818	13.171	-4.64638	1.05127e-09	11.2926	1.60653	3.21454e-08	6.18159e-06	No	meth_hypo_RNA_up	LOW QUALITY:Transmembrane protein, putative	0	0	XP_010318938.2	0
Solyc04g077270	SL3.0ch04	62332420	62334420	-	6514	9346	7335	11131	41.072	39.722	-1.35023	0.00684443	2.94692	5.20851	0.00136412	0.0300072	No	meth_hypo_RNA_up	Serine/threonine-protein kinase	GO:0048544	recognition of pollen	XP_010320274.1	AT4G27290.1
Solyc04g077460	SL3.0ch04	62453076	62455076	+	46	826	21	667	5.275	3.052	-2.2229	0.0182159	3.02296	3.46093	1.74144e-05	0.00102279	No	meth_hypo_RNA_up	Amino acid transporter	0	0	XP_010320289.1	AT3G30390.1
Solyc04g077920	SL3.0ch04	62861780	62863780	+	1021	9167	570	6964	10.022	7.566	-2.45589	2.30284e-08	1.05003	6.7406	0.000998138	0.0235091	No	meth_hypo_RNA_up	Interferon-related developmental regulator family protein	GO:0005488	binding	XP_004238095.1	AT1G27760.3
Solyc04g078340	SL3.0ch04	63186958	63188958	+	3496	7893	3114	8339	30.696	27.189	-3.5069	8.98182e-09	2.88258	1.29702	0.000654313	0.0173103	No	meth_hypo_RNA_up	Cytochrome P450	GO:0016705|GO:0055114	oxidoreductase activity, acting on paired donors, with incorporation or reduction of molecular oxygen | oxidation-reduction process	XP_019069222.2	AT5G10600.1
Solyc04g079360	SL3.0ch04	63972715	63974715	+	9597	6823	10910	8222	58.447	57.025	-1.42214	0.00440715	2.351	4.5691	0.000288345	0.00912702	No	meth_hypo_RNA_up	R2R3MYB transcription factor 77	GO:0003677	DNA binding	XP_004238184.1	AT3G50060.1
Solyc04g081530	SL3.0ch04	65560981	65562981	+	2492	7986	1802	8401	23.783	17.661	-6.12169	1.60069e-26	6.05605	4.17403	3.06388e-13	2.6729e-10	Yes	meth_hypo_RNA_up	DNAJ-like protein	0	0	NP_001234377.2	AT4G36040.1
Solyc04g081560	SL3.0ch04	65595159	65597159	+	3992	6252	3556	6912	38.969	33.97	-4.99896	2.46261e-13	4.28259	0.667233	0.0019279	0.0391969	Yes	meth_hypo_RNA_up	Pathogenesis-related thaumatin family protein	0	0	XP_004238367.1	AT4G24180.1
Solyc04g082140	SL3.0ch04	66008652	66010652	-	1277	6270	1232	6661	16.921	15.609	-1.31186	0.0155395	2.90222	6.25029	0.000766457	0.0192789	No	meth_hypo_RNA_up	pectinesterase	GO:0055114	oxidation-reduction process	NP_001333832.1	AT1G76160.1
Solyc04g082270	SL3.0ch04	66081829	66083829	-	2422	7076	2406	8132	25.5	22.832	-2.66845	1.13501e-05	2.71973	2.86712	0.000267834	0.00866957	No	meth_hypo_RNA_up	DUF241 domain protein (DUF241)	0	0	XP_004238415.1	AT1G76240.1
Solyc05g005150	SL3.0ch05	136996	138996	-	3000	8348	2889	8532	26.436	25.296	-1.14087	0.0270008	3.46577	4.36266	2.22068e-08	4.48753e-06	No	meth_hypo_RNA_up	Kelch repeat-containing F-box family protein, putative	GO:0005515	protein binding	XP_004238648.1	AT1G23390.1
Solyc05g005570	SL3.0ch05	405880	407880	+	1277	5800	1095	6594	18.044	14.241	-3.80325	7.4394e-10	6.83442	3.4232	8.2652e-08	1.3561e-05	No	meth_hypo_RNA_up	BURP domain-containing protein (Fragment)	0	0	XP_004238669.1	AT1G70370.1
Solyc05g005810	SL3.0ch05	628868	630868	-	2741	9378	2102	9330	22.617	18.387	-4.23039	3.36006e-15	2.86398	1.58241	0.000279394	0.00893956	No	meth_hypo_RNA_up	Serine/threonine-protein kinase WNK-related	0	0	XP_004238686.1	AT1G60060.1
Solyc05g005910	SL3.0ch05	700223	702223	-	27	98	0	20	21.6	0	-21.6	0.0145024	3.94068	-1.02693	0.00195424	0.0395359	No	meth_hypo_RNA_up	Major facilitator superfamily protein	GO:0005215|GO:0006810|GO:0016020	transporter activity | transport | membrane	XP_004239355.3	AT1G52190.1
Solyc05g008770	SL3.0ch05	3001770	3003770	-	2369	4929	1900	4609	32.461	29.19	-3.2706	3.22044e-05	1.40047	4.37218	5.947e-05	0.00267899	No	meth_hypo_RNA_up	Bidirectional amino acid transporter 1	GO:0006865|GO:0016021|GO:0055085	amino acid transport | integral component of membrane | transmembrane transport	XP_004238886.1	AT2G01170.1
Solyc05g010120	SL3.0ch05	4298208	4300208	+	2764	9001	2676	9620	23.493	21.763	-1.73024	0.00098505	1.91882	5.13081	8.10856e-05	0.00337241	No	meth_hypo_RNA_up	Phospholipid-transporting ATPase	GO:0016021	integral component of membrane	XP_004238982.1	AT1G68710.1
Solyc05g015060	SL3.0ch05	9771754	9773754	+	4274	5208	4828	6191	45.075	43.815	-1.25965	0.0364833	1.88556	4.47626	0.000618816	0.0165921	No	meth_hypo_RNA_up	P-loop containing nucleoside triphosphate hydrolases superfamily protein	GO:0005524	ATP binding	XP_004239200.1	AT3G50940.1
Solyc05g015840	SL3.0ch05	12393135	12395135	+	4762	6269	4747	7006	43.169	40.39	-2.77956	2.16025e-05	4.27352	3.00639	1.30814e-05	0.000810909	No	meth_hypo_RNA_up	Squamosa promoter binding protein 13	GO:0003677|GO:0005634	DNA binding | nucleus	XP_010321018.1	AT5G50670.1
Solyc05g018050	SL3.0ch05	19892972	19894972	+	5021	8784	5902	11561	36.371	33.797	-2.57371	2.64e-06	4.94883	1.37177	4.48701e-05	0.00215714	No	meth_hypo_RNA_up	LOW QUALITY:RING/U-box superfamily protein	GO:0005515|GO:0008270	protein binding | zinc ion binding	XP_025884451.1	AT5G59550.1
Solyc05g041910	SL3.0ch05	55032290	55034290	+	5523	7565	5672	8453	42.199	40.156	-2.04321	0.00049559	2.28125	7.41174	4.64526e-06	0.000355785	No	meth_hypo_RNA_up	Auxin induced-like protein	0	0	XP_004240164.1	AT5G47530.1
Solyc05g046340	SL3.0ch05	59475543	59477543	+	8359	8734	7907	9248	48.903	46.092	-2.81154	2.65925e-07	5.16197	0.245421	0.000730023	0.0185847	No	meth_hypo_RNA_up	Phosphomannomutase	GO:0004615|GO:0005737|GO:0009298	phosphomannomutase activity | cytoplasm | GDP-mannose biosynthetic process	XP_004240127.1	AT2G45790.1
Solyc05g050350	SL3.0ch05	61318500	61320500	-	5063	6695	5369	7476	43.06	41.798	-1.26168	0.0250317	8.64707	-1.07553	0.00243203	0.0463692	Yes	meth_hypo_RNA_up	Cyclic nucleotide-gated channel	GO:0005216|GO:0006811|GO:0016020|GO:0055085	ion channel activity | ion transport | membrane | transmembrane transport	XP_010321519.1	AT5G53130.1
Solyc05g051480	SL3.0ch05	62681623	62683623	+	5181	8691	5680	10237	37.349	35.685	-1.6635	0.00205925	3.33718	3.43515	0.000475086	0.0134971	Yes	meth_hypo_RNA_up	DNA-directed RNA polymerase subunit beta	0	0	XP_004236674.1	0
Solyc05g051530	SL3.0ch05	62744114	62746114	-	168	454	170	775	27.01	17.989	-9.02023	2.52231e-05	6.07381	2.10511	4.61276e-05	0.00219693	No	meth_hypo_RNA_up	ABC transporter G family member	GO:0016020	membrane	XP_010321482.1	AT1G17840.1
Solyc05g052100	SL3.0ch05	63277665	63279665	-	4269	6044	4220	6507	41.394	39.34	-2.05437	0.00167898	1.60773	3.87586	0.0020862	0.0414091	Yes	meth_hypo_RNA_up	Glutamate dehydrogenase	GO:0016639|GO:0055114	oxidoreductase activity, acting on the CH-NH2 group of donors, NAD or NADP as acceptor | oxidation-reduction process	NP_001311437.1	AT5G07440.1
Solyc05g052980	SL3.0ch05	64002806	64004806	-	2812	7612	2429	8629	26.976	21.966	-5.01021	5.84266e-17	1.80519	8.58381	1.02149e-05	0.000665511	No	meth_hypo_RNA_up	Protein phosphatase 2C	GO:0043169	cation binding	XP_004239911.1	AT3G11410.1
Solyc05g054170	SL3.0ch05	64969254	64971254	-	1984	9854	1625	9939	16.76	14.052	-2.70736	1.70364e-08	1.97608	5.94738	0.000709579	0.0182763	No	meth_hypo_RNA_up	GRAS family transcription factor	0	0	XP_019069407.1	AT4G17230.1
Solyc05g054750	SL3.0ch05	65450930	65452930	+	6329	6773	6594	7789	48.306	45.846	-2.45981	4.3199e-05	5.82808	2.54745	4.40742e-05	0.002139	Yes	meth_hypo_RNA_up	Plant protein 1589 of unknown function	0	0	XP_010321370.1	AT3G55240.1
Solyc05g056170	SL3.0ch05	66404944	66406944	+	4101	8364	4499	10306	32.9	30.388	-2.51174	9.80794e-06	4.67607	0.783399	0.00186659	0.0383922	Yes	meth_hypo_RNA_up	phenylalanine ammonia-lyase 2	GO:0016841	ammonia-lyase activity	NP_001307530.1	AT3G53260.1
Solyc03g082800	SL3.0ch06	410062	412062	+	738	821	1114	1381	47.338	44.649	-2.68874	0.0487714	3.49427	-0.254735	0.00108218	0.0250372	No	meth_hypo_RNA_up	LOW QUALITY:HEAT/U-box domain-containing protein	0	0	XP_004251482.1	0
Solyc06g006090	SL3.0ch06	1115318	1117318	+	4430	8617	4517	10610	33.954	29.861	-4.09365	5.50101e-13	5.4189	3.05306	1.14374e-09	3.75316e-07	No	meth_hypo_RNA_up	LOW QUALITY:JOSEPHIN-like protein, putative	0	0	XP_010321914.1	AT1G07300.1
Solyc06g007240	SL3.0ch06	1294855	1296855	+	7327	7853	7093	9079	48.267	43.86	-4.4077	1.7418e-14	4.57236	1.05748	0.000176216	0.00619754	No	meth_hypo_RNA_up	BAG family molecular chaperone regulator 2	GO:0005515	protein binding	XP_004240412.1	AT3G51780.1
Solyc06g009020	SL3.0ch06	2962321	2964321	+	3100	8306	3323	11410	27.179	22.555	-4.62387	4.19373e-17	1.37472	6.07116	0.000143142	0.0052674	No	meth_hypo_RNA_up	Glutathione S-transferase	GO:0005515	protein binding	XP_004240536.1	AT2G47730.1
Solyc06g011470	SL3.0ch06	7558759	7560759	-	2632	4450	2420	4466	37.165	35.144	-2.02087	0.00788044	3.4559	2.69646	1.36548e-05	0.000842077	Yes	meth_hypo_RNA_up	LOW QUALITY:beta-amylase 5	0	0	NP_001234779.1	0
Solyc06g016800	SL3.0ch06	13739999	13741999	+	381	394	325	640	49.161	33.679	-15.4825	1.74079e-10	3.48424	1.01507	0.000121053	0.00458182	No	meth_hypo_RNA_up	LOW QUALITY:CTP synthase	GO:0003883|GO:0006221	CTP synthase activity | pyrimidine nucleotide biosynthetic process	XP_025886066.1	AT1G30820.1
Solyc06g034370	SL3.0ch06	24271256	24273256	-	4366	8510	4266	9064	33.908	32.003	-1.90505	0.000794351	4.02082	2.84156	0.000585522	0.0159343	No	meth_hypo_RNA_up	Plant invertase/pectin methylesterase inhibitor superfamily protein	GO:0004857	enzyme inhibitor activity	XP_004240754.1	AT5G62350.1
Solyc06g048700	SL3.0ch06	31573935	31575935	-	6175	8345	6869	9908	42.528	40.943	-1.58459	0.00310605	5.47883	1.76193	2.79494e-05	0.00148543	No	meth_hypo_RNA_up	LOW QUALITY:B-cell lymphoma 6 protein, putative	0	0	NP_001266164.1	0
Solyc06g050630	SL3.0ch06	33452496	33454496	-	7334	7089	8244	8585	50.849	48.987	-1.86247	0.000778914	3.76434	5.89127	5.03621e-08	9.09773e-06	Yes	meth_hypo_RNA_up	arogenate dehydrogenase	GO:0004665|GO:0006571|GO:0008977|GO:0055114	prephenate dehydrogenase (NADP) activity | tyrosine biosynthetic process | prephenate dehydrogenase (NAD) activity | oxidation-reduction process	XP_004240892.1	AT5G34930.1
Solyc06g050950	SL3.0ch06	34018962	34020962	-	5121	9735	4890	11037	34.471	30.703	-3.76834	4.625e-12	7.60776	-0.298683	2.17083e-05	0.00121044	No	meth_hypo_RNA_up	LOB domain-containing protein, putative	0	0	XP_010322163.1	AT2G30130.1
Solyc06g051250	SL3.0ch06	34560022	34562022	+	1766	10569	2041	13641	14.317	13.015	-1.30206	0.00120227	1.89952	2.71731	1.77904e-05	0.00103805	No	meth_hypo_RNA_up	LOW QUALITY:RING/U-box superfamily protein, putative	GO:0005515|GO:0008270	protein binding | zinc ion binding	XP_004243404.1	AT3G11110.1
Solyc06g051970	SL3.0ch06	35736606	35738606	-	2658	11496	2403	12081	18.779	16.591	-2.18842	1.50988e-06	7.25427	-1.32011	0.00167066	0.035296	No	meth_hypo_RNA_up	Calcineurin B-like protein	GO:0005509	calcium ion binding	XP_010322211.1	AT5G24270.1
Solyc06g053640	SL3.0ch06	36570008	36572008	+	4390	8591	4719	9712	33.819	32.7	-1.11822	0.027038	2.79383	2.013	0.00119231	0.0270085	Yes	meth_hypo_RNA_up	RING/U-box superfamily protein	GO:0005515|GO:0008270	protein binding | zinc ion binding	XP_004241012.1	AT5G43420.1
Solyc06g053830	SL3.0ch06	36782928	36784928	-	3123	4430	2829	4496	41.348	38.621	-2.72665	0.000555963	7.37374	2.88347	4.69354e-06	0.00035795	No	meth_hypo_RNA_up	auxin-regulated IAA7	GO:0005634|GO:0006355	nucleus | regulation of transcription, DNA-templated	NP_001266039.1	AT3G04730.1
Solyc06g054020	SL3.0ch06	36981680	36983680	+	5449	8163	5135	8093	40.031	38.819	-1.21168	0.023228	0.946822	6.17769	0.00179646	0.0372714	No	meth_hypo_RNA_up	P-loop containing nucleoside triphosphate hydrolases superfamily protein	0	0	XP_004241042.1	AT1G05460.1
Solyc06g054250	SL3.0ch06	37183001	37185001	+	3012	11898	3007	13746	20.201	17.949	-2.25218	4.65546e-07	0.925803	5.9495	0.0017145	0.0359451	No	meth_hypo_RNA_up	5'-nucleotidase surE	GO:0016787	hydrolase activity	XP_004241053.1	AT4G14930.1
Solyc06g054630	SL3.0ch06	37471693	37473693	+	3131	4739	3360	5437	39.784	38.195	-1.58915	0.0196829	6.66532	0.0239826	0.000709564	0.0182763	Yes	meth_hypo_RNA_up	Ethylene-responsive transcription factor	GO:0003700|GO:0006355	DNA-binding transcription factor activity | regulation of transcription, DNA-templated	XP_004241075.1	AT1G19210.1
Solyc06g061190	SL3.0ch06	39310989	39312989	-	493	8901	430	10125	5.248	4.074	-1.17413	7.97258e-05	1.27863	5.10424	0.00102267	0.0239234	No	meth_hypo_RNA_up	VQ motif-containing protein	0	0	XP_019070125.1	AT2G35230.1
Solyc06g061200	SL3.0ch06	39321006	39323006	-	1541	4756	1670	6314	24.472	20.917	-3.55514	6.41923e-07	2.76134	4.18749	0.00011274	0.00432662	No	meth_hypo_RNA_up	glycine-rich protein 1	0	0	NP_001234810.1	0
Solyc06g062330	SL3.0ch06	39431855	39433855	-	2308	6124	1548	5241	27.372	22.802	-4.57033	2.33291e-10	3.97042	0.879168	0.000226178	0.00752551	Yes	meth_hypo_RNA_up	Glycosyltransferase	GO:0008152|GO:0016758	metabolic process | transferase activity, transferring hexosyl groups	XP_025887516.1	AT3G11340.1
Solyc06g062960	SL3.0ch06	39854740	39856740	-	2051	6882	1865	7007	22.96	21.021	-1.93862	0.00132642	2.17025	2.54627	0.000105306	0.00411198	No	meth_hypo_RNA_up	DUF1677 family protein (DUF1677)	0	0	XP_004241926.1	AT1G72510.1
Solyc06g063300	SL3.0ch06	40123398	40125398	+	160	632	123	674	20.202	15.433	-4.76915	0.00904924	2.88056	3.05993	8.89756e-07	9.40484e-05	No	meth_hypo_RNA_up	Plastid-lipid associated protein PAP / fibrillin family protein	0	0	XP_004241927.1	AT1G51550.1
Solyc06g064500	SL3.0ch06	40278947	40280947	-	4816	11010	5362	12812	30.431	29.504	-0.92725	0.0331826	1.64829	4.34021	0.000798562	0.0198354	No	meth_hypo_RNA_up	O-methyltransferase	GO:0046983	protein dimerization activity	XP_004241912.1	AT5G54160.1
Solyc06g065060	SL3.0ch06	40692517	40694517	-	3182	4086	530	1457	43.781	26.673	-17.1076	1.72441e-43	9.1364	-0.954783	0.00105751	0.0245776	No	meth_hypo_RNA_up	FAD-binding Berberine family protein	GO:0050660	flavin adenine dinucleotide binding	XP_004242239.1	AT5G44440.1
Solyc06g065550	SL3.0ch06	41055434	41057434	+	4646	8181	2273	6134	36.22	27.037	-9.18348	1.81071e-43	5.39233	0.318088	9.85178e-07	0.000102139	No	meth_hypo_RNA_up	Cysteine/Histidine-rich C1 domain family protein	0	0	XP_025884280.1	0
Solyc06g065630	SL3.0ch06	41128111	41130111	+	3643	10075	2996	9721	26.556	23.559	-2.99733	3.22288e-08	8.84998	-0.186659	2.41492e-08	4.81662e-06	No	meth_hypo_RNA_up	flavin monooxygenase	GO:0016491|GO:0055114	oxidoreductase activity | oxidation-reduction process	NP_001234343.1	AT5G11320.1
Solyc06g066310	SL3.0ch06	41715676	41717676	-	3865	3856	416	2339	50.058	15.1	-34.9585	7.58753e-245	2.15106	4.22928	2.13407e-06	0.000189879	No	meth_hypo_RNA_up	Phosphomevalonate kinase	GO:0005524	ATP binding	XP_025887383.1	AT1G31910.1
Solyc06g066590	SL3.0ch06	41957295	41959295	-	726	2212	9	400	24.711	2.2	-22.5102	3.49882e-33	9.3547	-0.0569486	2.64193e-05	0.00142802	No	meth_hypo_RNA_up	Plant cadmium resistance 2	0	0	XP_010322692.1	AT1G52200.1
Solyc06g066740	SL3.0ch06	42047674	42049674	+	56	1020	10	362	5.204	2.688	-2.51629	0.0237951	1.65126	5.13211	1.89907e-05	0.00109382	No	meth_hypo_RNA_up	Ran-binding protein 1 domain-containing	GO:0046907	intracellular transport	XP_004241727.1	AT1G52380.1
Solyc06g068240	SL3.0ch06	42412541	42414541	+	7309	7648	5603	7386	48.867	43.137	-5.73025	6.17793e-21	3.95745	3.64812	6.17847e-18	1.00451e-14	Yes	meth_hypo_RNA_up	Pyrophosphate-energized vacuolar membrane proton pump	GO:0004427|GO:0009678|GO:0015992|GO:0016020	inorganic diphosphatase activity | pyrophosphate hydrolysis-driven proton transmembrane transporter activity | membrane	XP_004241690.1	AT1G15690.1
Solyc06g068460	SL3.0ch06	42548569	42550569	+	3111	9099	1747	6834	25.479	20.359	-5.12018	2.7925e-17	1.74165	8.34008	3.45878e-06	0.000278008	No	meth_hypo_RNA_up	WRKY transcription factor 40	GO:0003700|GO:0006355|GO:0043565	DNA-binding transcription factor activity | regulation of transcription, DNA-templated | sequence-specific DNA binding	NP_001234301.2	AT1G80840.1
Solyc06g068680	SL3.0ch06	42692189	42694189	+	5789	10567	6382	12213	35.394	34.321	-1.07269	0.0199999	4.05879	1.48498	9.47671e-05	0.00377885	No	meth_hypo_RNA_up	Respiratory burst oxidase homolog	GO:0016491|GO:0055114	oxidoreductase activity | oxidation-reduction process	XP_004241641.1	AT5G47910.1
Solyc06g071780	SL3.0ch06	44345933	44347933	+	5038	5815	4488	5808	46.42	43.59	-2.8306	3.44089e-05	2.52417	5.59089	3.62503e-10	1.42484e-07	No	meth_hypo_RNA_up	Dehydration-induced 19-like protein	0	0	XP_010322537.1	AT3G05700.1
Solyc06g071810	SL3.0ch06	44373480	44375480	+	8053	5729	8219	6446	58.431	56.045	-2.38628	4.54431e-05	2.44679	6.51354	6.18961e-05	0.00275361	Yes	meth_hypo_RNA_up	Leucine-rich repeat receptor-like kinase	GO:0004672|GO:0006468	protein kinase activity | protein phosphorylation	NP_001302425.1	AT2G31880.1
Solyc06g073990	SL3.0ch06	45875266	45877266	+	2699	8804	3082	10997	23.463	21.891	-1.57269	0.00193031	5.85597	-0.076844	0.00059911	0.016185	No	meth_hypo_RNA_up	Gb:AAF02129.1, putative	0	0	XP_019067411.1	AT3G11600.1
Solyc06g074140	SL3.0ch06	45996881	45998881	+	4530	5786	4510	6298	43.912	41.728	-2.18402	0.0010075	9.76476	0.786129	8.97236e-06	0.000605516	No	meth_hypo_RNA_up	LOW QUALITY:U-box domain-containing family protein	GO:0005488	binding	XP_004241334.1	AT3G11840.1
Solyc06g074530	SL3.0ch06	46252456	46254456	+	2029	5681	2186	7661	26.316	22.2	-4.11682	5.23164e-10	3.65116	6.64406	3.61967e-09	1.0441e-06	Yes	meth_hypo_RNA_up	Arogenate dehydratase	GO:0008152|GO:0016597	metabolic process | amino acid binding	XP_004241304.1	AT1G08250.1
Solyc06g075010	SL3.0ch06	46684047	46686047	-	147	3253	55	2464	4.324	2.183	-2.14012	6.66991e-06	2.27911	2.93454	4.34753e-05	0.00211856	No	meth_hypo_RNA_up	Chaperonin 60 alpha subunit	GO:0005737|GO:0042026	cytoplasm | protein refolding	XP_004241283.1	AT2G28000.1
Solyc06g075190	SL3.0ch06	46806493	46808493	+	1396	4622	1418	5491	23.197	20.524	-2.67312	0.000214995	2.17392	5.87429	2.853e-06	0.000239545	No	meth_hypo_RNA_up	LOW QUALITY:Methyltransferase-related protein	0	0	XP_004241273.1	AT5G18150.1
Solyc06g076040	SL3.0ch06	47356685	47358685	-	592	7337	368	6149	7.466	5.647	-1.81949	1.29898e-05	1.94656	7.22692	0.000150568	0.00545094	No	meth_hypo_RNA_up	U-box domain-containing protein	GO:0005515	protein binding	XP_004241233.1	AT3G46510.1
Solyc06g076050	SL3.0ch06	47363009	47365009	+	186	3285	119	3376	5.359	3.405	-1.95382	6.05945e-05	2.15287	7.69723	2.63515e-06	0.000223882	No	meth_hypo_RNA_up	Ankyrin repeat family protein	GO:0005515|GO:0008270	protein binding | zinc ion binding	NP_001265951.1	AT2G28840.1
Solyc06g076100	SL3.0ch06	47389495	47391495	-	2169	10185	2008	11422	17.557	14.952	-2.60547	2.3027e-08	1.57308	5.26253	0.000338641	0.0103526	No	meth_hypo_RNA_up	Phosphatase 2C family protein	GO:0004722|GO:0006470	protein serine/threonine phosphatase activity | protein dephosphorylation	NP_001266229.2	AT5G02400.1
Solyc06g076220	SL3.0ch06	47504119	47506119	-	3626	9854	3483	11371	26.899	23.448	-3.45088	5.33822e-11	3.85891	2.55451	0.000129606	0.00485417	No	meth_hypo_RNA_up	expansin18	GO:0009664	plant-type cell wall organization	NP_001234761.2	AT2G39700.1
Solyc06g082590	SL3.0ch06	48409221	48411221	-	403	3267	145	2319	10.981	5.885	-5.09619	7.26135e-12	1.77982	5.13198	0.000584039	0.015915	No	meth_hypo_RNA_up	DNA-binding protein Pti6	GO:0003700|GO:0006355	DNA-binding transcription factor activity | regulation of transcription, DNA-templated	NP_001233991.1	AT4G27950.1
Solyc06g083470	SL3.0ch06	48925659	48927659	-	3927	3267	4356	3881	54.587	52.883	-1.70382	0.0195234	3.59777	0.105218	0.00011585	0.00441761	No	meth_hypo_RNA_up	NAD(P)-binding Rossmann-fold superfamily protein	GO:0016491	oxidoreductase activity	XP_004242401.1	AT5G06060.1
Solyc07g005180	SL3.0ch07	181976	183976	-	1623	8384	1576	9519	16.219	14.205	-2.01405	4.6756e-05	2.28623	4.15633	1.53405e-06	0.000146711	No	meth_hypo_RNA_up	ubiquitin-associated protein (DUF1068)	0	0	XP_004242566.1	AT2G24290.1
Solyc07g005380	SL3.0ch07	288985	290985	+	3906	7818	3296	7630	33.316	30.167	-3.1497	4.90429e-07	13.0668	2.89149	7.30756e-05	0.00311905	No	meth_hypo_RNA_up	Pathogenesis-related (PR)-10-related norcoclaurine synthase-like protein	GO:0006952|GO:0009607	defense response | response to biotic stimulus	XP_004242575.1	0
Solyc07g005390	SL3.0ch07	294385	296385	+	1725	3899	978	4363	30.672	18.311	-12.3609	5.12239e-50	2.83339	4.55973	1.60023e-10	7.24521e-08	Yes	meth_hypo_RNA_up	aldehyde dehydrogenase 11A3	GO:0008152|GO:0016491|GO:0055114	metabolic process | oxidoreductase activity | oxidation-reduction process	XP_010323179.1	AT2G24270.4
Solyc07g005770	SL3.0ch07	628796	630796	-	2857	8013	2814	9307	26.283	23.216	-3.06744	1.08658e-07	2.31175	1.48504	0.000279715	0.00893956	No	meth_hypo_RNA_up	LOW QUALITY:Disease resistance protein	GO:0043531	ADP binding	XP_019070216.1	AT1G53350.1
Solyc07g006220	SL3.0ch07	1041437	1043437	-	3261	9405	3233	11382	25.746	22.121	-3.62498	6.49561e-12	3.06601	8.72072	1.92914e-10	8.31343e-08	No	meth_hypo_RNA_up	UDP-glucuronate 4-epimerase 4	GO:0005975|GO:0016857	carbohydrate metabolic process | racemase and epimerase activity, acting on carbohydrates and derivatives	XP_010323223.1	AT4G30440.1
Solyc07g006480	SL3.0ch07	1261329	1263329	-	2803	8777	2544	8889	24.206	22.251	-1.95415	0.000374388	10.1111	3.94274	3.30801e-08	6.29367e-06	No	meth_hypo_RNA_up	Receptor-like kinase	GO:0004672|GO:0006468	protein kinase activity | protein phosphorylation	XP_025887641.1	AT5G48380.1
Solyc07g007430	SL3.0ch07	2153632	2155632	-	4462	8196	4460	9496	35.25	31.958	-3.29285	2.3027e-08	1.86171	6.45854	4.23968e-06	0.000326118	Yes	meth_hypo_RNA_up	S-acyltransferase	GO:0005515	protein binding	XP_004242727.1	AT5G20350.1
Solyc07g008140	SL3.0ch07	2849703	2851703	-	825	4188	440	3440	16.457	11.34	-5.11701	1.26982e-11	3.41149	2.83191	0.00111727	0.0256335	No	meth_hypo_RNA_up	Blue copper protein	GO:0009055	electron transfer activity	XP_010323300.1	AT5G20230.1
Solyc07g025380	SL3.0ch07	27596236	27598236	-	466	9834	301	9840	4.524	2.968	-1.55612	7.53765e-09	2.95602	3.13176	0.000353279	0.0106558	No	meth_hypo_RNA_up	DNA ligase-like protein	0	0	XP_004242963.1	AT1G75150.1
Solyc07g041900	SL3.0ch07	54628551	54630551	-	4457	9113	4228	9426	32.845	30.965	-1.87923	0.000690057	0.96631	9.76877	0.000429299	0.0124032	No	meth_hypo_RNA_up	cysteine proteinase	GO:0008234	cysteine-type peptidase activity	NP_001296313.1	AT3G45310.1
Solyc07g042390	SL3.0ch07	55649603	55651603	-	4306	5780	3974	6085	42.693	39.507	-3.18593	5.13792e-06	2.55688	4.09413	6.66791e-06	0.000464908	No	meth_hypo_RNA_up	Plant invertase/pectin methylesterase inhibitor superfamily protein	GO:0004857	enzyme inhibitor activity	NP_001333811.1	AT5G20740.1
Solyc07g042540	SL3.0ch07	56017674	56019674	-	1037	3107	1057	3527	25.024	23.058	-1.96567	0.0182749	2.2509	2.99317	0.000544277	0.0150679	No	meth_hypo_RNA_up	LOW QUALITY:DNA mismatch repair protein MutS, type 2	0	0	XP_004236313.1	0
Solyc07g042593	SL3.0ch07	56181598	56183598	-	3467	5307	3277	5672	39.514	36.619	-2.89586	6.79553e-05	2.40729	3.65235	1.61229e-05	0.000969249	No	meth_hypo_RNA_up	Protein kinase superfamily protein	GO:0005524	ATP binding	XP_004243677.1	0
Solyc07g045350	SL3.0ch07	58583088	58585088	-	8355	9940	9364	12283	45.668	43.258	-2.41049	1.72985e-06	2.61921	5.33086	0.000105575	0.00411801	No	meth_hypo_RNA_up	Acetoacetyl-CoA thiolase	GO:0008152|GO:0016747	metabolic process | transferase activity, transferring acyl groups other than amino-acyl groups	XP_010323908.1	AT5G48230.2
Solyc07g048070	SL3.0ch07	59378164	59380164	+	3512	8943	3161	9234	28.198	25.502	-2.69529	2.08511e-06	7.60246	0.998672	0.00035748	0.0107629	Yes	meth_hypo_RNA_up	Auxin induced-like protein	0	0	XP_004243538.1	AT5G47530.1
Solyc07g049630	SL3.0ch07	60086541	60088541	+	2174	3127	5662	8964	41.011	38.712	-2.29925	0.00237054	1.38506	5.11189	0.000178322	0.00625315	No	meth_hypo_RNA_up	LOW QUALITY:Pectinesterase	0	0	XP_004243497.1	0
Solyc07g049670	SL3.0ch07	60151645	60153645	+	411	2114	499	4059	16.277	10.948	-5.32944	5.28999e-10	5.10565	3.68175	9.26081e-09	2.19822e-06	No	meth_hypo_RNA_up	Benzyl alcohol O-benzoyltransferase	GO:0016747	transferase activity, transferring acyl groups other than amino-acyl groups	XP_004243495.1	AT5G17540.1
Solyc07g049730	SL3.0ch07	60206215	60208215	-	2379	5789	3527	10382	29.126	25.358	-3.76817	2.23824e-09	0.895984	6.36898	0.0014813	0.031956	No	meth_hypo_RNA_up	transmembrane protein, putative (DUF1068)	0	0	XP_004243490.1	AT1G05070.1
Solyc07g053910	SL3.0ch07	62449159	62451159	-	1473	8130	1633	9873	15.339	14.193	-1.14636	0.0117563	1.71604	5.81459	1.44846e-06	0.000139778	No	meth_hypo_RNA_up	Protein kinase superfamily protein	GO:0005524	ATP binding	XP_004243358.1	AT1G53050.1
Solyc07g054670	SL3.0ch07	63044544	63046544	+	9703	6435	4283	4551	60.125	48.483	-11.642	2.1399e-68	4.46303	2.88475	3.35514e-15	4.00022e-12	No	meth_hypo_RNA_up	External alternative NAD(P)H-ubiquinone oxidoreductase B2, mitochondrial	GO:0016491|GO:0055114	oxidoreductase activity | oxidation-reduction process	XP_004243314.1	AT4G21490.1
Solyc07g055630	SL3.0ch07	63724731	63726731	-	24	271	2	129	8.136	1.527	-6.60888	0.00473074	8.4989	0.484705	9.31379e-05	0.0037389	No	meth_hypo_RNA_up	Serine/threonine-protein kinase	GO:0004672|GO:0006468	protein kinase activity | protein phosphorylation	XP_004243251.1	AT4G32300.1
Solyc07g056190	SL3.0ch07	64175077	64177077	-	6673	10837	6020	11186	38.11	34.988	-3.12186	2.99238e-09	4.82305	1.5	6.55659e-06	0.000459835	No	meth_hypo_RNA_up	Heavy metal transport/detoxification superfamily protein, putative	0	0	XP_004243216.1	AT3G07600.1
Solyc07g062490	SL3.0ch07	65337013	65339013	+	609	8878	455	8031	6.419	5.362	-1.05754	0.00200491	6.87588	3.0644	1.6399e-06	0.000155586	No	meth_hypo_RNA_up	Serine/threonine-protein kinase	0	0	XP_004244275.2	AT1G78830.1
Solyc07g063200	SL3.0ch07	65865606	65867606	+	962	9502	813	9782	9.193	7.673	-1.51999	6.56879e-05	1.23636	5.0258	0.0011066	0.025463	No	meth_hypo_RNA_up	RING/U-box superfamily protein	GO:0046872	metal ion binding	XP_025887926.1	AT4G27470.1
Solyc07g063460	SL3.0ch07	66072176	66074176	-	2647	7733	2467	8732	25.501	22.029	-3.47221	4.05859e-09	1.16921	4.87027	7.17551e-05	0.00307738	No	meth_hypo_RNA_up	S-adenosyl-L-methionine-dependent methyltransferases superfamily protein	GO:0008152|GO:0008168	metabolic process | methyltransferase activity	XP_004244199.1	AT5G54400.1
Solyc07g064610	SL3.0ch07	66808803	66810803	+	4165	9034	3387	11450	31.555	22.828	-8.72736	4.35988e-59	1.606	5.66002	5.48026e-05	0.00252275	Yes	meth_hypo_RNA_up	alcium-dependent protein kinase 1	GO:0005524	ATP binding	NP_001234582.2	AT3G20410.1
Solyc07g064820	SL3.0ch07	66937913	66939913	-	2012	8307	1475	7089	19.498	17.223	-2.27475	5.5612e-05	2.75839	4.97086	3.1808e-07	4.15223e-05	No	meth_hypo_RNA_up	LOW QUALITY:MAP kinase kinase kinase 59	GO:0005524	ATP binding	XP_004244346.1	AT5G55090.1
Solyc07g065060	SL3.0ch07	67114083	67116083	-	2366	6399	2148	6200	26.994	25.731	-1.26301	0.0317459	3.23032	1.8345	8.81945e-06	0.000597451	No	meth_hypo_RNA_up	MBOAT (Membrane bound O-acyl transferase) family protein, putative	GO:0008374	O-acyltransferase activity	XP_025887953.1	AT5G55360.1
Solyc08g005405	SL3.0ch08	298864	300864	+	29	388	2	104	6.954	1.887	-5.06764	0.0323715	2.02518	2.21977	0.00113021	0.0258698	No	meth_hypo_RNA_up	Cytosine-specific methyltransferase	GO:0008168	methyltransferase activity	XP_010324482.1	0
Solyc08g006740	SL3.0ch08	1298383	1300383	-	1024	2250	1067	2613	31.277	28.995	-2.28216	0.0210427	9.3141	1.23966	2.12994e-05	0.00119785	No	meth_hypo_RNA_up	aromatic amino acid decarboxylase 2	GO:0016831|GO:0019752|GO:0030170	carboxy-lyase activity | carboxylic acid metabolic process | pyridoxal phosphate binding	NP_001233859.1	AT1G43710.1
Solyc08g007350	SL3.0ch08	1918516	1920516	-	1168	2984	850	2912	28.131	22.594	-5.53666	2.80041e-08	4.20553	-0.76077	3.01863e-06	0.000250752	No	meth_hypo_RNA_up	LOW QUALITY:Werner Syndrome-like exonuclease	GO:0003676|GO:0006139|GO:0008408	nucleic acid binding | nucleobase-containing compound metabolic process | 3'-5' exonuclease activity	XP_004244710.1	AT3G12410.1
Solyc08g007820	SL3.0ch08	2327666	2329666	-	6936	7476	7507	8482	48.127	46.951	-1.17553	0.0220769	2.7415	5.65023	0.001107	0.025463	No	meth_hypo_RNA_up	C-repeat binding factor	GO:0003700|GO:0006355	DNA-binding transcription factor activity | regulation of transcription, DNA-templated	XP_010324621.1	AT5G51990.1
Solyc08g008150	SL3.0ch08	2617621	2619621	+	8321	9679	8379	11195	46.228	42.807	-3.42099	6.14905e-11	5.21093	1.96341	0.000621872	0.016647	Yes	meth_hypo_RNA_up	LOW QUALITY:Late embryogenesis abundant hydroxyproline-rich glycoprotein	0	0	XP_010324637.1	AT2G46150.1
Solyc08g008370	SL3.0ch08	2793594	2795594	-	4311	7628	4346	8338	36.109	34.264	-1.84491	0.00177236	1.67274	9.4259	0.000549444	0.015164	No	meth_hypo_RNA_up	DCD (Development and cell death) domain protein	0	0	XP_004244639.1	AT5G42050.1
Solyc08g016150	SL3.0ch08	6948286	6950286	+	3591	8582	3442	9313	29.5	26.985	-2.51422	1.10739e-05	3.55153	4.94551	3.84902e-08	7.13324e-06	Yes	meth_hypo_RNA_up	LOW QUALITY:Avr9/Cf-9 rapidly elicited protein 180	0	0	XP_010316919.1	0
Solyc08g016310	SL3.0ch08	7199917	7201917	-	1566	4700	1141	4141	24.992	21.602	-3.39035	1.90265e-05	3.20813	4.23288	0.000204247	0.00693606	No	meth_hypo_RNA_up	Leucine-rich receptor-like kinase family protein, putative	GO:0005515	protein binding	XP_025888169.1	AT1G74170.1
Solyc08g036640	SL3.0ch08	10545250	10547250	+	4901	7783	4822	9648	38.639	33.324	-5.31511	4.32712e-19	8.94644	4.16936	6.37414e-09	1.6764e-06	No	meth_hypo_RNA_up	Jasmonate zim-domain protein	0	0	XP_004244920.1	AT1G30135.1
Solyc08g029000	SL3.0ch08	38973709	38975709	-	5503	6309	5971	7231	46.588	45.228	-1.36022	0.0176892	12.7321	2.69375	9.99097e-06	0.000658116	No	meth_hypo_RNA_up	Lipoxygenase	GO:0016702|GO:0046872|GO:0055114	oxidoreductase activity, acting on single donors with incorporation of molecular oxygen, incorporation of two atoms of oxygen | metal ion binding | oxidation-reduction process	XP_004244890.1	AT1G55020.1
Solyc08g059710	SL3.0ch08	44856641	44858641	-	1528	8457	1398	8496	15.303	14.13	-1.17318	0.0117399	2.86664	2.85488	0.000986439	0.0232891	No	meth_hypo_RNA_up	EEIG1/EHBP1 N-terminal domain-containing protein	0	0	XP_004245019.1	AT3G11760.1
Solyc08g068610	SL3.0ch08	57805942	57807942	-	3818	5989	3618	5986	38.931	37.672	-1.25957	0.0367046	4.38423	4.36422	2.66285e-07	3.55391e-05	No	meth_hypo_RNA_up	Decarboxylase family protein IPR002129 Pyridoxal phosphate-dependent decarboxylase	GO:0016831|GO:0019752|GO:0030170	carboxy-lyase activity | carboxylic acid metabolic process | pyridoxal phosphate binding	NP_001233852.2	AT1G43710.1
Solyc08g068660	SL3.0ch08	57848857	57850857	-	985	1985	894	2318	33.165	27.833	-5.33186	6.20405e-06	2.1583	1.02253	0.00198919	0.0399939	No	meth_hypo_RNA_up	Histidine decarboxylase	0	0	NP_001233852.2	AT1G43710.1
Solyc08g068680	SL3.0ch08	57878575	57880575	-	2606	6017	2401	6372	30.222	27.368	-2.85344	3.17855e-05	4.94619	5.48618	1.03896e-08	2.41309e-06	No	meth_hypo_RNA_up	aromatic amino acid decarboxylase 1A	GO:0016831|GO:0019752|GO:0030170	carboxy-lyase activity | carboxylic acid metabolic process | pyridoxal phosphate binding	NP_001233845.1	AT1G43710.1
Solyc08g068710	SL3.0ch08	57906318	57908318	-	1089	3651	583	2635	22.975	18.117	-4.85784	2.16289e-07	3.95352	1.77296	1.41794e-05	0.000864001	No	meth_hypo_RNA_up	Tyramine n-hydroxycinnamoyl transferase	GO:0008080	N-acetyltransferase activity	XP_004245284.1	AT2G39030.1
Solyc08g068730	SL3.0ch08	57934073	57936073	-	6824	7056	7827	8470	49.164	48.027	-1.13702	0.0263324	4.09409	2.63611	1.90731e-06	0.000174925	Yes	meth_hypo_RNA_up	Tyramine n-hydroxycinnamoyl transferase	GO:0008080	N-acetyltransferase activity	NP_001234877.1	AT2G39030.1
Solyc08g068770	SL3.0ch08	57963926	57965926	-	3719	6226	3400	7429	37.396	31.397	-5.9985	5.16382e-19	3.36493	3.09444	2.73615e-05	0.00146507	No	meth_hypo_RNA_up	N-hydroxycinnamoyl-CoA:tyramine N-hydroxycinnamoyl transferase	GO:0008080	N-acetyltransferase activity	NP_001316134.1	AT2G39030.1
Solyc08g074682	SL3.0ch08	58958432	58960432	-	713	5162	821	7396	12.136	9.991	-2.14469	5.68948e-05	12.5912	2.39522	1.38004e-07	2.08276e-05	No	meth_hypo_RNA_up	polyphenol oxidase precursor	GO:0008152|GO:0016491	metabolic process | oxidoreductase activity	NP_001334885.1	0
Solyc08g074683	SL3.0ch08	58963074	58965074	-	6686	9025	6220	8757	42.556	41.53	-1.02582	0.0356559	8.8952	-1.00026	0.000187895	0.00651224	No	meth_hypo_RNA_up	polyphenol oxidase precursor	GO:0008152|GO:0016491	metabolic process | oxidoreductase activity	NP_001296326.1	0
Solyc08g075150	SL3.0ch08	59424699	59426699	-	2557	4038	3390	6391	38.772	34.659	-4.11276	1.25324e-07	3.99145	3.14537	1.09509e-12	7.8338e-10	No	meth_hypo_RNA_up	Coiled-coil domain-containing 73	0	0	XP_019070587.1	AT5G45310.1
Solyc08g076520	SL3.0ch08	60625436	60627436	+	1616	6461	1767	8426	20.007	17.335	-2.672	4.68319e-06	2.51319	4.13637	0.000170762	0.00605407	No	meth_hypo_RNA_up	Transmembrane protein, putative	0	0	XP_004245981.1	AT2G35470.1
Solyc08g077760	SL3.0ch08	61780783	61782783	-	2859	6079	3114	7134	31.987	30.386	-1.6006	0.010312	2.50756	3.89097	4.50596e-05	0.00216044	No	meth_hypo_RNA_up	Disease resistance protein (TIR-NBS-LRR class) family	0	0	XP_019067370.1	0
Solyc08g078090	SL3.0ch08	62050700	62052700	-	2573	6576	2645	7615	28.123	25.78	-2.34357	0.000206471	3.12523	5.48497	6.39322e-05	0.00284065	No	meth_hypo_RNA_up	Alpha/beta-Hydrolases superfamily protein	GO:0006629	lipid metabolic process	XP_004245812.1	AT4G16820.1
Solyc08g078840	SL3.0ch08	62659468	62661468	+	3736	4959	3319	5081	42.967	39.512	-3.45532	5.11324e-06	5.29192	-0.247931	0.000420748	0.0122452	Yes	meth_hypo_RNA_up	root meristem growth factor	0	0	XP_004245755.1	0
Solyc08g079080	SL3.0ch08	62841258	62843258	+	646	5784	466	5240	10.047	8.167	-1.87981	0.00029571	5.11762	-0.105254	0.00127296	0.0284214	No	meth_hypo_RNA_up	symbol=lin9	GO:0004564|GO:0004575	beta-fructofuranosidase activity | sucrose alpha-glucosidase activity	NP_001234069.1	AT1G12240.1
Solyc08g079100	SL3.0ch08	62866700	62868700	-	6792	8684	6495	8861	43.887	42.296	-1.59114	0.003197	1.73417	2.01755	0.000925972	0.0222432	Yes	meth_hypo_RNA_up	CRABS CLAW 1b	GO:0007275	multicellular organism development	XP_004245737.1	AT4G00180.1
Solyc08g079680	SL3.0ch08	63279845	63281845	+	7711	6444	8350	7270	54.475	53.457	-1.01834	0.0399605	3.01271	1.24167	0.000363949	0.0108935	No	meth_hypo_RNA_up	YCF49-like protein	0	0	XP_004245694.1	AT4G22830.2
Solyc08g079700	SL3.0ch08	63294813	63296813	+	9115	9661	10434	11840	48.546	46.844	-1.70216	0.000467424	1.2253	8.20983	0.000134637	0.00501112	No	meth_hypo_RNA_up	Zinc finger A20 and AN1 domain-containing stress-associated protein	GO:0008270	zinc ion binding	XP_010325448.1	AT4G12040.1
Solyc08g080170	SL3.0ch08	63615641	63617641	-	9343	11642	10148	13505	44.522	42.904	-1.61863	0.000466933	1.90968	5.22433	2.28555e-05	0.00126157	No	meth_hypo_RNA_up	Hydroxymethylglutaryl-CoA synthase, putative	GO:0004421|GO:0008299	hydroxymethylglutaryl-CoA synthase activity | isoprenoid biosynthetic process	XP_004245661.1	AT4G11820.2
Solyc08g080290	SL3.0ch08	63729634	63731634	-	896	8177	579	7045	9.875	7.594	-2.28102	3.02771e-07	8.47624	0.650126	1.26905e-09	4.12648e-07	No	meth_hypo_RNA_up	Dehydration responsive element binding transcription factor	GO:0003700|GO:0006355	DNA-binding transcription factor activity | regulation of transcription, DNA-templated	XP_004245652.1	AT5G52020.1
Solyc08g081610	SL3.0ch08	64726676	64728676	+	1135	6708	754	6297	14.472	10.694	-3.77798	9.89259e-12	8.53784	-0.446432	9.14773e-05	0.00369296	No	meth_hypo_RNA_up	WRKY family transcription factor, putative	GO:0003700|GO:0006355|GO:0043565	DNA-binding transcription factor activity | regulation of transcription, DNA-templated | sequence-specific DNA binding	XP_004245564.1	AT4G23550.1
Solyc08g082090	SL3.0ch08	65106826	65108826	+	8346	10289	7893	10375	44.787	43.207	-1.57999	0.00159877	2.26225	7.77192	8.65169e-06	0.00059056	Yes	meth_hypo_RNA_up	LOW QUALITY:Avr9/Cf-9 rapidly elicited protein	0	0	XP_004245532.1	AT5G41810.1
Solyc08g082370	SL3.0ch08	65316403	65318403	+	6010	7700	6236	8902	43.837	41.194	-2.64227	6.41682e-06	5.52689	2.30932	3.58191e-10	1.42353e-07	No	meth_hypo_RNA_up	LOW QUALITY:calpain-type cysteine protease family	0	0	XP_004246518.1	0
Solyc08g082620	SL3.0ch08	65456829	65458829	+	1566	7251	1483	7557	17.761	16.405	-1.35628	0.00955574	6.89791	2.28752	0.000207609	0.00703197	No	meth_hypo_RNA_up	3-oxoacyl-[acyl-carrier-protein] synthase	GO:0006633|GO:0016747	fatty acid biosynthetic process | transferase activity, transferring acyl groups other than amino-acyl groups	XP_004245499.1	AT5G46290.3
Solyc08g082670	SL3.0ch08	65489366	65491366	+	5927	7492	6022	9023	44.169	40.027	-4.14213	4.257e-12	3.4011	-0.506301	0.00234004	0.0449509	Yes	meth_hypo_RNA_up	Cellulose synthase	GO:0016020|GO:0016760|GO:0030244	membrane | cellulose synthase (UDP-forming) activity | cellulose biosynthetic process	XP_004245498.1	AT4G23990.1
Solyc08g082770	SL3.0ch08	65584659	65586659	-	938	7834	959	9283	10.693	9.363	-1.32971	0.00168504	6.53242	2.10978	4.33741e-05	0.00211853	No	meth_hypo_RNA_up	Bidirectional sugar transporter SWEET	GO:0016021	integral component of membrane	XP_004245483.1	AT4G10850.1
Solyc08g083040	SL3.0ch08	65757714	65759714	-	164	2708	149	3530	5.71	4.05	-1.66029	0.00138898	1.15688	7.40945	0.000103443	0.00404808	No	meth_hypo_RNA_up	Kinase family protein	GO:0005524	ATP binding	XP_010325326.1	AT4G24100.1
Solyc09g005730	SL3.0ch09	501950	503950	+	5309	6210	5395	6792	46.089	44.268	-1.82059	0.00329469	3.0842	4.26728	2.71622e-06	0.000229446	No	meth_hypo_RNA_up	Plant protein 1589 of unknown function	0	0	XP_004246743.1	AT5G02580.1
Solyc09g005830	SL3.0ch09	570686	572686	+	2410	4708	1875	5168	33.858	26.622	-7.23565	4.02916e-20	4.66831	4.30267	5.06451e-05	0.00237104	No	meth_hypo_RNA_up	LOW QUALITY:ACI49	GO:0000145|GO:0006887	exocyst | exocytosis	XP_004246739.1	AT3G09520.1
Solyc09g007520	SL3.0ch09	1099542	1101542	-	2832	11794	3002	13590	19.363	18.093	-1.26972	0.00278065	3.98218	2.35007	0.00101261	0.0237248	No	meth_hypo_RNA_up	Peroxidase	GO:0004601|GO:0042744	peroxidase activity | hydrogen peroxide catabolic process	XP_025888518.1	AT2G37130.1
Solyc09g007900	SL3.0ch09	1422353	1424353	-	320	2811	271	2837	10.22	8.719	-1.50094	0.0249924	4.03808	6.82296	1.15867e-08	2.59769e-06	No	meth_hypo_RNA_up	Phenylalanine ammonia-lyase	GO:0016841	ammonia-lyase activity	XP_004246649.1	AT2G37040.1
Solyc09g008320	SL3.0ch09	1782019	1784019	+	2359	11998	2189	14068	16.431	13.465	-2.96604	1.02793e-12	2.09042	4.17882	9.03453e-05	0.0036638	No	meth_hypo_RNA_up	Xyloglucan endotransglucosylase/hydrolase	GO:0010411|GO:0016762|GO:0042546	xyloglucan metabolic process | xyloglucan:xyloglucosyl transferase activity | cell wall biogenesis	XP_004246615.1	AT2G36870.1
Solyc09g008720	SL3.0ch09	2154110	2156110	+	2568	9808	1878	10112	20.75	15.663	-5.08679	6.63095e-24	12.2694	3.29215	1.41729e-34	7.24193e-31	No	meth_hypo_RNA_up	Exostosin-like protein	0	0	XP_010325948.1	AT5G03795.1
Solyc09g010840	SL3.0ch09	4149776	4151776	-	215	3846	138	3569	5.294	3.723	-1.57158	0.000660791	0.976234	6.36386	0.000839408	0.0205895	No	meth_hypo_RNA_up	phantastica	GO:0005634|GO:0006351|GO:0010338	nucleus | transcription, DNA-templated | leaf formation	XP_025888480.1	AT2G37630.1
Solyc09g010850	SL3.0ch09	4167020	4169020	+	8108	6533	8245	6990	55.379	54.119	-1.25993	0.0162155	3.49893	4.54618	6.17408e-05	0.00275355	Yes	meth_hypo_RNA_up	Protein kinase	GO:0005524	ATP binding	XP_004246420.1	AT5G02290.1
Solyc09g010980	SL3.0ch09	4331412	4333412	+	9646	7761	9945	9043	55.414	52.375	-3.0393	1.05029e-08	5.00924	3.91162	4.09938e-09	1.1637e-06	No	meth_hypo_RNA_up	LOW QUALITY:cyclin-dependent kinase inhibitor	0	0	XP_025888670.1	AT5G02220.1
Solyc09g011140	SL3.0ch09	4498037	4500037	+	3665	10430	2808	8628	26.002	24.554	-1.44809	0.00532606	6.33423	4.11108	2.24784e-05	0.00124459	No	meth_hypo_RNA_up	NAD(P)-binding Rossmann-fold superfamily protein	GO:0016491	oxidoreductase activity	XP_004246428.1	AT5G06060.1
Solyc09g011240	SL3.0ch09	4571064	4573064	+	5241	6318	6694	8619	45.341	43.714	-1.6268	0.00503527	1.36282	3.8686	0.000352678	0.0106558	No	meth_hypo_RNA_up	aldo-keto reductase 4B-like	GO:0016491|GO:0055114	oxidoreductase activity | oxidation-reduction process	NP_001315612.1	AT2G37790.1
Solyc09g011540	SL3.0ch09	4834054	4836054	+	5277	6942	4087	7357	43.187	35.713	-7.4738	8.78568e-31	7.71671	0.4723	0.000353327	0.0106558	Yes	meth_hypo_RNA_up	Glutathione S-transferase	GO:0005515	protein binding	XP_004246385.1	AT3G09270.1
Solyc09g011590	SL3.0ch09	4864429	4866429	+	4546	8509	4798	9754	34.822	32.971	-1.85049	0.000897169	4.34488	4.8038	0.00266635	0.0498017	No	meth_hypo_RNA_up	Glutathione S-transferase-like protein	GO:0005515	protein binding	XP_004246381.1	AT3G09270.1
Solyc09g011660	SL3.0ch09	4910632	4912632	-	1464	4117	1025	4848	26.232	17.453	-8.77911	5.58652e-29	1.25037	6.24481	0.00176224	0.0366891	No	meth_hypo_RNA_up	Adenine nucleotide alpha hydrolases-like superfamily protein	GO:0006950	response to stress	XP_004246377.1	AT3G53990.1
Solyc09g011740	SL3.0ch09	5031830	5033830	+	2331	11122	1950	12432	17.327	13.559	-3.76838	1.4887e-17	1.67363	6.05807	0.000197745	0.00673306	No	meth_hypo_RNA_up	Phosphatidylinositol:ceramide inositolphosphotransferase	0	0	XP_004246371.1	AT2G37940.1
Solyc09g030360	SL3.0ch09	32354473	32356473	-	56	65	5083	8409	46.281	37.674	-8.60681	0.030953	6.86807	2.67105	1.64982e-20	2.95053e-17	No	meth_hypo_RNA_up	LOW QUALITY:Thiamine biosynthetic bifunctional enzyme TH1, chloroplastic	0	0	XP_010326791.1	0
Solyc09g055765	SL3.0ch09	44922877	44924877	+	1515	2337	5690	10099	39.33	36.038	-3.29247	0.000133119	2.12744	3.30961	0.000405885	0.0119128	No	meth_hypo_RNA_up	Transcription factor, putative	GO:0046983	protein dimerization activity	XP_010313623.1	0
Solyc09g056180	SL3.0ch09	47566759	47568759	-	552	769	4450	7977	41.787	35.809	-5.9774	2.18736e-05	5.11919	1.5594	7.69609e-09	1.9523e-06	No	meth_hypo_RNA_up	Dehydroascorbate reductase	0	0	XP_019071004.1	AT1G19570.1
Solyc09g056450	SL3.0ch09	49455316	49457316	-	2201	1855	9753	13082	54.265	42.711	-11.5545	8.23617e-41	2.24587	8.39518	1.87771e-07	2.69727e-05	No	meth_hypo_RNA_up	U-box domain-containing protein 9	GO:0005515	protein binding	XP_004247038.1	AT3G07360.1
Solyc09g059470	SL3.0ch09	54767973	54769973	-	108	107	424	1193	50.233	26.221	-24.0112	7.03398e-12	3.91258	2.43282	3.25298e-06	0.00026504	No	meth_hypo_RNA_up	Trypsin-like cysteine/serine peptidase domain-containing protein	0	0	XP_004247068.1	AT3G07210.1
Solyc09g061710	SL3.0ch09	60437113	60439113	-	11	9	5695	11807	55	32.539	-22.4609	0.0277163	1.3596	4.78432	2.26534e-05	0.00125234	No	meth_hypo_RNA_up	Alba DNA/RNA-binding protein	GO:0003676	nucleic acid binding	XP_004247299.3	AT3G07030.1
Solyc09g061890	SL3.0ch09	60849838	60851838	+	1288	1446	3508	6360	47.11	35.549	-11.5612	1.00827e-26	9.87059	1.33226	1.34215e-07	2.0428e-05	Yes	meth_hypo_RNA_up	Pectate lyase	0	0	XP_004247105.1	AT4G13710.1
Solyc09g065670	SL3.0ch09	64130668	64132668	+	2128	10894	2444	13749	16.342	15.093	-1.24863	0.00240905	1.98484	4.3146	5.77539e-05	0.00263036	No	meth_hypo_RNA_up	Zinc finger family protein	GO:0046872	metal ion binding	XP_004247200.1	AT1G03840.1
Solyc09g065890	SL3.0ch09	64414161	64416161	+	1832	6193	1891	7309	22.829	20.554	-2.27431	0.000260527	2.29805	1.78048	0.000224348	0.00749951	No	meth_hypo_RNA_up	Alpha/beta-Hydrolases superfamily protein	GO:0006629	lipid metabolic process	XP_010326538.2	AT2G30550.2
Solyc09g074300	SL3.0ch09	66511261	66513261	+	7897	9551	8472	11202	45.26	43.062	-2.19829	2.12172e-05	2.6168	2.34806	0.000436651	0.012575	No	meth_hypo_RNA_up	Histone H2A	GO:0046982	protein heterodimerization activity	XP_004247479.1	AT1G08880.1
Solyc09g074430	SL3.0ch09	66660761	66662761	-	9280	11384	10648	13609	44.909	43.897	-1.01241	0.0178541	5.69871	3.50436	0.000771763	0.0193851	No	meth_hypo_RNA_up	Sl Monooxygenase	GO:0016491|GO:0055114	oxidoreductase activity | oxidation-reduction process	NP_001307793.1	AT1G48910.1
Solyc09g074630	SL3.0ch09	66874330	66876330	+	1583	5786	1280	5749	21.482	18.21	-3.27161	1.13685e-06	2.30301	3.12432	0.000280828	0.00894682	No	meth_hypo_RNA_up	Phototropic-responsive NPH3 family protein	GO:0005515	protein binding	XP_010326604.1	AT1G03010.1
Solyc09g074890	SL3.0ch09	67122598	67124598	+	2376	9175	2225	9625	20.57	18.776	-1.79328	0.000457613	2.42589	1.96767	9.83312e-05	0.00389492	No	meth_hypo_RNA_up	Rapid alkalinization factor	0	0	XP_010326583.1	AT4G15800.1
Solyc09g082780	SL3.0ch09	68878017	68880017	+	2711	7138	2497	8272	27.526	23.187	-4.33871	2.19462e-12	1.16797	6.91829	0.000155949	0.00562298	No	meth_hypo_RNA_up	Stem-specific protein TSJT1	0	0	XP_004247611.1	AT3G22850.1
Solyc09g082810	SL3.0ch09	68901773	68903773	+	3117	4075	2820	5288	43.34	34.78	-8.55936	2.42737e-26	2.48742	3.90633	1.8358e-06	0.000170111	No	meth_hypo_RNA_up	Glycine-rich protein	0	0	NP_001292912.1	0
Solyc09g083360	SL3.0ch09	69444700	69446700	+	4376	6999	4643	8387	38.47	35.633	-2.83718	5.37165e-06	4.53665	2.58187	0.000197468	0.00673306	Yes	meth_hypo_RNA_up	Basic helix-loop-helix (BHLH) family transcription factor	GO:0046983	protein dimerization activity	XP_004247648.1	AT5G43650.1
Solyc09g090470	SL3.0ch09	70454846	70456846	+	3352	9024	3160	9385	27.085	25.189	-1.89536	0.000516477	5.65149	0.195474	0.00195125	0.0395225	No	meth_hypo_RNA_up	Peptide transporter	GO:0005215|GO:0006810|GO:0016020	transporter activity | transport | membrane	XP_004247757.1	AT5G46050.1
Solyc09g090970	SL3.0ch09	70832461	70834461	-	5063	9295	5687	11212	35.263	33.653	-1.60969	0.00201919	10.173	2.57323	1.65398e-07	2.44461e-05	No	meth_hypo_RNA_up	Major allergen Pru ar 1	GO:0006952|GO:0009607	defense response | response to biotic stimulus	NP_001234352.2	AT1G24020.1
Solyc09g090990	SL3.0ch09	70832536	70834536	-	5095	9783	5715	11624	34.245	32.96	-1.28482	0.00910216	10.0123	0.212558	0.000942231	0.0225128	No	meth_hypo_RNA_up	PR10 protein	GO:0006952|GO:0009607	defense response | response to biotic stimulus	NP_001234352.2	AT1G24020.1
Solyc09g091030	SL3.0ch09	70855969	70857969	+	9852	10158	9959	11465	49.235	46.485	-2.75013	3.35994e-08	1.22768	7.04619	0.00074477	0.0188261	No	meth_hypo_RNA_up	Beta-amylase 1	GO:0005975	carbohydrate metabolic process	NP_001234556.2	AT3G23920.1
Solyc09g091890	SL3.0ch09	71580093	71582093	+	2201	8812	1876	9192	19.985	16.95	-3.03571	1.0349e-08	4.01515	2.30898	5.37515e-06	0.000397228	No	meth_hypo_RNA_up	Small ubiquitin-related modifier	GO:0005515	protein binding	XP_025888789.1	AT4G26840.1
Solyc09g091970	SL3.0ch09	71644977	71646977	-	689	2264	245	1235	23.332	16.554	-6.77815	1.81929e-07	6.1516	0.860201	0.000895263	0.0216363	No	meth_hypo_RNA_up	NAD(P)-binding Rossmann-fold superfamily protein	GO:0003824|GO:0050662	catalytic activity | coenzyme binding	XP_004247861.1	AT2G21280.1
Solyc09g092300	SL3.0ch09	71912233	71914233	-	298	168	6049	5944	63.948	50.438	-13.5107	1.52952e-08	5.81376	1.56378	5.06248e-13	4.11534e-10	Yes	meth_hypo_RNA_up	Ph-3 resistance protein	GO:0043531	ADP binding	XP_004247880.1	AT3G46530.1
Solyc09g098440	SL3.0ch09	72758848	72760848	+	3497	8159	837	2914	30.002	22.314	-7.68767	1.34029e-19	6.46769	2.60549	1.28896e-09	4.15346e-07	Yes	meth_hypo_RNA_up	ROP-interactive CRIB motif protein	0	0	XP_004247985.1	AT5G55290.1
Solyc10g005120	SL3.0ch10	100973	102973	+	77	651	22	553	10.577	3.826	-6.75084	3.29983e-06	7.32	3.22424	5.09576e-30	2.02517e-26	No	meth_hypo_RNA_up	2-oxoglutarate (2OG) and Fe(II)-dependent oxygenase superfamily protein	GO:0016491|GO:0055114	oxidoreductase activity | oxidation-reduction process	XP_004248411.1	AT4G16330.2
Solyc10g005510	SL3.0ch10	419232	421232	-	13404	9281	14536	10448	59.088	58.181	-0.906267	0.0243539	1.65591	6.26859	4.79355e-06	0.00036241	No	meth_hypo_RNA_up	Glyceraldehyde-3-phosphate dehydrogenase	GO:0016620|GO:0055114	oxidoreductase activity, acting on the aldehyde or oxo group of donors, NAD or NADP as acceptor | oxidation-reduction process	XP_004248314.1	AT1G16300.1
Solyc10g005620	SL3.0ch10	497938	499938	-	2013	10801	1929	11873	15.709	13.976	-1.73315	6.50789e-05	8.46495	0.883374	2.76834e-08	5.41082e-06	No	meth_hypo_RNA_up	FAD/NAD(P)-binding oxidoreductase family protein	GO:0016491|GO:0055114	oxidoreductase activity | oxidation-reduction process	XP_010327223.1	AT1G56000.1
Solyc10g005740	SL3.0ch10	594250	596250	-	6461	10400	7775	13049	38.319	37.337	-0.982471	0.0268517	5.8095	-0.81774	0.00204494	0.0409079	No	meth_hypo_RNA_up	Sec14p-like phosphatidylinositol transfer family protein	0	0	XP_010327217.1	AT1G55690.1
Solyc10g006960	SL3.0ch10	1380192	1382192	-	2550	2983	1953	3072	46.087	38.866	-7.22144	2.0921e-13	3.57632	2.27935	3.26308e-10	1.32629e-07	Yes	meth_hypo_RNA_up	RING/U-box superfamily protein	GO:0046872	metal ion binding	XP_019071624.1	AT4G27470.1
Solyc10g007100	SL3.0ch10	1484215	1486215	-	7383	6879	6657	7019	51.767	48.677	-3.09042	3.3671e-07	1.53899	4.69987	4.93737e-06	0.000369456	No	meth_hypo_RNA_up	Protein DETOXIFICATION	GO:0006855|GO:0015238|GO:0015297|GO:0016020|GO:0055085	drug transmembrane transport | antiporter activity | membrane | transmembrane transport	XP_010327132.1	AT3G23560.1
Solyc10g007280	SL3.0ch10	1675179	1677179	-	1863	4153	2061	5948	30.967	25.734	-5.23387	2.37393e-11	3.59853	4.43841	0.000947839	0.0225757	Yes	meth_hypo_RNA_up	P-loop containing nucleoside triphosphate hydrolases superfamily protein	GO:0005524	ATP binding	XP_004248243.1	AT3G50930.1
Solyc10g007550	SL3.0ch10	1855277	1857277	-	9906	10186	10274	11507	49.303	47.17	-2.13365	1.37518e-05	0.948516	5.30609	0.00130261	0.0288316	Yes	meth_hypo_RNA_up	RNA helicase DEAD31	GO:0003676|GO:0005524	nucleic acid binding | ATP binding	NP_001315127.1	AT5G60990.1
Solyc10g008150	SL3.0ch10	2269126	2271126	+	3866	9115	2714	7657	29.782	26.169	-3.61286	1.92461e-09	8.67367	0.715884	7.5697e-07	8.3053e-05	No	meth_hypo_RNA_up	Glutaredoxin	GO:0009055|GO:0015035|GO:0045454	electron transfer activity | protein disulfide oxidoreductase activity | cell redox homeostasis	XP_004248179.3	AT1G28480.1
Solyc10g008910	SL3.0ch10	2923229	2925229	+	9569	7728	11086	9265	55.322	54.474	-0.84775	0.0497435	2.15935	5.05233	0.00231558	0.0446489	Yes	meth_hypo_RNA_up	Histone H3	GO:0046982	protein heterodimerization activity	XP_010324306.1	AT5G65360.1
Solyc10g011910	SL3.0ch10	4176501	4178501	-	7538	6241	7225	7643	54.706	48.594	-6.11214	3.61366e-24	4.61891	4.03781	2.52323e-05	0.00137368	Yes	meth_hypo_RNA_up	WRKY transcription factor 25	GO:0003700|GO:0006355|GO:0043565	DNA-binding transcription factor activity | regulation of transcription, DNA-templated | sequence-specific DNA binding	XP_004248063.1	AT4G01250.1
Solyc10g018340	SL3.0ch10	7430384	7432384	-	2888	9583	2662	9729	23.158	21.483	-1.67439	0.00111354	9.93324	0.497847	0.00021347	0.00719642	No	meth_hypo_RNA_up	Small auxin up-regulated RNA71	GO:0009733	response to auxin	XP_004229795.1	AT2G45210.1
Solyc10g044470	SL3.0ch10	26442402	26444402	+	10709	18185	11788	21184	37.063	35.752	-1.31151	0.000566217	1.77252	7.56414	1.00882e-05	0.000660867	Yes	meth_hypo_RNA_up	Chloride channel protein	GO:0005247|GO:0006821|GO:0016020|GO:0055085	voltage-gated chloride channel activity | chloride transport | membrane | transmembrane transport	XP_004248849.1	AT5G49890.1
Solyc10g050960	SL3.0ch10	51184703	51186703	-	1305	4031	1171	3987	24.457	22.703	-1.75392	0.0190292	5.75942	2.38038	1.19172e-08	2.64754e-06	No	meth_hypo_RNA_up	Ethylene-responsive transcription factor	GO:0003700|GO:0006355	DNA-binding transcription factor activity | regulation of transcription, DNA-templated	XP_004248735.1	0
Solyc10g050970	SL3.0ch10	51184359	51186359	+	1305	4031	1181	4483	24.457	20.851	-3.60553	6.85651e-06	6.80903	5.92949	2.95873e-10	1.23056e-07	No	meth_hypo_RNA_up	Ethylene Response Factor D.4	GO:0003700|GO:0006355	DNA-binding transcription factor activity | regulation of transcription, DNA-templated	XP_004248735.1	AT4G34410.1
Solyc10g051225	SL3.0ch10	51721406	51723406	+	6756	7100	7283	8175	48.759	47.115	-1.6439	0.00326648	8.33961	-0.0514011	0.00102492	0.0239604	No	meth_hypo_RNA_up	Leucine-rich receptor-like protein kinase family protein	0	0	XP_025884445.1	0
Solyc10g051350	SL3.0ch10	51902197	51904197	-	8713	10933	9677	12813	44.35	43.028	-1.32198	0.00411603	0.897322	6.18406	0.00230299	0.0444301	No	meth_hypo_RNA_up	NAD(P)H-quinone oxidoreductase subunit I, chloroplastic	GO:0016020|GO:0016651|GO:0051539|GO:0055114	membrane | oxidoreductase activity, acting on NAD(P)H | 4 iron, 4 sulfur cluster binding | oxidation-reduction process	XP_004248718.1	AT1G79010.1
Solyc10g055760	SL3.0ch10	57341054	57343054	+	2203	5128	2020	5142	30.05	28.204	-1.84606	0.0089766	1.92076	7.17685	0.000106195	0.00412868	No	meth_hypo_RNA_up	NAC domain protein NAC6	GO:0003677|GO:0006355	DNA binding | regulation of transcription, DNA-templated	XP_004248638.1	AT2G17040.1
Solyc10g074740	SL3.0ch10	58433166	58435166	+	3806	3581	3449	3647	51.523	48.605	-2.9181	0.000361111	1.66201	8.39638	1.78028e-06	0.000166259	Yes	meth_hypo_RNA_up	Calcium-binding protein CAST	GO:0005509	calcium ion binding	XP_004249018.1	AT4G20780.1
Solyc10g075070	SL3.0ch10	58843830	58845830	-	1999	9691	1681	9540	17.1	14.981	-2.11925	1.37224e-05	4.89487	4.28384	8.42058e-12	5.37834e-09	No	meth_hypo_RNA_up	Non-specific lipid-transfer protein	GO:0006869|GO:0008289	lipid transport | lipid binding	NP_001316314.1	AT2G38540.1
Solyc10g075100	SL3.0ch10	58869437	58871437	-	8684	15072	8153	15785	36.555	34.059	-2.49616	1.9248e-08	4.38034	6.00561	1.4686e-08	3.12671e-06	No	meth_hypo_RNA_up	Non-specific lipid-transfer protein	GO:0006869|GO:0008289	lipid transport | lipid binding	NP_001234735.1	AT2G38540.1
Solyc10g076760	SL3.0ch10	59815211	59817211	+	7518	9470	8218	11630	44.255	41.405	-2.85009	5.58928e-08	2.56509	3.52378	1.00484e-06	0.000103576	No	meth_hypo_RNA_up	Kinase family protein	GO:0005524	ATP binding	XP_004249079.1	AT3G09010.1
Solyc10g078740	SL3.0ch10	60601017	60603017	-	14682	7331	12784	8099	66.697	61.217	-5.47969	3.99445e-31	2.9926	4.36255	5.67676e-09	1.53823e-06	Yes	meth_hypo_RNA_up	Enoyl reductase	0	0	XP_004249169.1	AT2G05990.1
Solyc10g079110	SL3.0ch10	60852870	60854870	-	7192	9482	7354	10568	43.133	41.033	-2.09965	7.23707e-05	3.62908	3.10233	2.50364e-06	0.000215265	No	meth_hypo_RNA_up	1-acyl-sn-glycerol-3-phosphate acyltransferase	GO:0008152|GO:0016746	metabolic process | transferase activity, transferring acyl groups	XP_004249199.1	AT3G57650.1
Solyc10g079130	SL3.0ch10	60873811	60875811	-	1681	7122	1318	8621	19.096	13.261	-5.83487	1.68646e-26	1.46818	6.86368	0.00175058	0.0365314	No	meth_hypo_RNA_up	MAP kinase kinase kinase 76	GO:0005524	ATP binding	XP_010312078.1	AT3G57530.1
Solyc10g080010	SL3.0ch10	61557030	61559030	+	5047	11130	4890	11242	31.199	30.312	-0.886193	0.0426585	1.93116	5.40168	0.000928391	0.0222565	Yes	meth_hypo_RNA_up	Glycosyltransferase	GO:0016757	transferase activity, transferring glycosyl groups	XP_004249254.1	AT2G41640.1
Solyc10g081120	SL3.0ch10	62396473	62398473	-	2717	10871	2560	10962	19.996	18.932	-1.06347	0.0153652	1.34763	6.07563	0.00253419	0.0477823	No	meth_hypo_RNA_up	alpha-L-arabinofuranosidase	GO:0046373|GO:0046556	L-arabinose metabolic process | alpha-L-arabinofuranosidase activity	NP_001233925.2	AT3G10740.1
Solyc10g081310	SL3.0ch10	62536141	62538141	-	6536	6280	6258	7295	50.999	46.174	-4.82447	1.67802e-14	1.20527	7.97497	0.00019608	0.0067188	No	meth_hypo_RNA_up	Histidine triad nucleotide binding protein	GO:0003824	catalytic activity	XP_004249357.1	AT3G56490.1
Solyc10g081320	SL3.0ch10	62545902	62547902	+	3081	12460	3215	14376	19.825	18.276	-1.54859	0.000281761	3.34552	1.88257	3.14213e-05	0.0016241	No	meth_hypo_RNA_up	LOW QUALITY:R2R3MYB transcription factor 69	GO:0003677	DNA binding	NP_001335087.1	AT1G69560.1
Solyc10g081420	SL3.0ch10	62614610	62616610	-	7343	10300	8040	12630	41.62	38.897	-2.72295	8.96059e-08	2.90245	2.74924	0.000140077	0.00518714	Yes	meth_hypo_RNA_up	Protein kinase	GO:0005515	protein binding	XP_004249365.1	AT3G03770.1
Solyc10g083650	SL3.0ch10	63563505	63565505	-	5613	3664	6141	4805	60.504	56.103	-4.40179	5.22398e-10	1.35559	7.7769	0.000134448	0.00500932	Yes	meth_hypo_RNA_up	Peroxiredoxin, putative	GO:0045454	cell redox homeostasis	XP_010312248.1	AT3G52960.1
Solyc10g084000	SL3.0ch10	63799321	63801321	+	3574	9502	4144	11527	27.333	26.444	-0.888768	0.0460154	3.05997	4.59722	1.67319e-06	0.000157906	No	meth_hypo_RNA_up	Heavy metal transport/detoxification superfamily protein	GO:0030001|GO:0046872	metal ion transport | metal ion binding	XP_004249483.1	AT5G03380.1
Solyc10g084320	SL3.0ch10	64038421	64040421	+	1066	1729	355	1197	38.14	22.874	-15.2658	1.4703e-24	2.4319	4.94917	6.67869e-07	7.4651e-05	No	meth_hypo_RNA_up	Subtilisin-like protease	GO:0004252|GO:0006508	serine-type endopeptidase activity | proteolysis	XP_004249504.1	AT5G67090.1
Solyc10g084880	SL3.0ch10	64381421	64383421	-	6581	6804	6123	7357	49.167	45.423	-3.74413	1.61093e-09	3.58584	6.92558	8.97527e-10	3.02856e-07	No	meth_hypo_RNA_up	LOW QUALITY:Avr9/Cf-9 rapidly elicited protein 137	0	0	NP_001234706.2	AT3G23160.1
Solyc10g084990	SL3.0ch10	64458492	64460492	+	3715	10747	3432	10853	25.688	24.025	-1.66281	0.000825349	1.36176	2.80022	0.000948876	0.0225757	No	meth_hypo_RNA_up	Phosphatidylinositol:ceramide inositolphosphotransferase	0	0	XP_004249552.1	AT3G54020.1
Solyc10g085590	SL3.0ch10	64833762	64835762	+	358	1409	48	488	20.26	8.955	-11.3051	5.00272e-10	1.56984	8.18185	0.000286434	0.00907455	No	meth_hypo_RNA_up	Ubiquitin-conjugating enzyme/RWD-like protein	GO:0006464|GO:0015031	cellular protein modification process | protein transport	XP_025883620.1	AT3G12400.1
Solyc10g086280	SL3.0ch10	65282752	65284752	-	975	5575	941	6095	14.885	13.374	-1.51142	0.00724065	2.27237	7.58058	0.000180003	0.00629358	No	meth_hypo_RNA_up	Heavy metal transport/detoxification superfamily protein	GO:0030001|GO:0046872	metal ion transport | metal ion binding	XP_004249614.1	AT5G03380.1
Solyc10g086490	SL3.0ch10	65421600	65423600	-	1442	9201	1475	10355	13.549	12.468	-1.08051	0.00959244	3.95471	2.7191	5.34482e-05	0.00246676	No	meth_hypo_RNA_up	Protein phosphatase 2c, putative	GO:0004722|GO:0006470	protein serine/threonine phosphatase activity | protein dephosphorylation	XP_004249837.1	AT1G07630.1
Solyc10g086520	SL3.0ch10	65435216	65437216	-	2123	7056	1747	8850	23.129	16.486	-6.64308	1.24966e-30	1.93171	5.2228	7.0614e-05	0.00304671	No	meth_hypo_RNA_up	expansin 6	GO:0009664	plant-type cell wall organization	NP_001334904.1	AT2G37640.1
Solyc10g086680	SL3.0ch10	65577183	65579183	-	3464	8939	4053	11285	27.929	26.425	-1.50416	0.00337771	3.0747	3.8045	2.20106e-06	0.000194389	No	meth_hypo_RNA_up	Class I heat shock protein	0	0	XP_010312365.1	AT1G07400.1
Solyc11g005380	SL3.0ch11	301995	303995	+	1525	9286	1448	10923	14.106	11.705	-2.40121	7.99815e-08	1.22176	6.98872	0.000416331	0.0121463	No	meth_hypo_RNA_up	Trihelix transcription factor GT-2	0	0	XP_004249868.1	AT1G76880.1
Solyc11g005800	SL3.0ch11	653783	655783	-	293	1063	105	907	21.608	10.375	-11.2322	6.2816e-13	1.79825	2.89634	0.000791061	0.0197175	No	meth_hypo_RNA_up	Transducin/WD40 repeat-like superfamily protein	GO:0005515	protein binding	XP_004249896.1	AT5G64630.2
Solyc11g006040	SL3.0ch11	849528	851528	-	2103	10478	1612	10857	16.716	12.928	-3.78762	1.39466e-16	2.89708	1.26903	0.0021591	0.0425023	No	meth_hypo_RNA_up	Receptor protein kinase, putative	GO:0005524	ATP binding	XP_004249911.1	AT1G66150.1
Solyc11g006540	SL3.0ch11	1195208	1197208	-	4022	1901	5661	3177	67.905	64.053	-3.85182	1.69286e-06	2.65997	4.31975	6.98189e-07	7.70766e-05	No	meth_hypo_RNA_up	FAD-dependent pyridine nucleotide-disulphide oxidoreductase	GO:0016491|GO:0055114	oxidoreductase activity | oxidation-reduction process	XP_004249943.1	AT3G44190.1
Solyc11g007020	SL3.0ch11	1507820	1509820	+	920	8601	905	9578	9.663	8.633	-1.02983	0.00738894	1.38681	5.7352	0.00191737	0.0391661	No	meth_hypo_RNA_up	mevalonate disphosphate decarboxylase	GO:0008299|GO:0016831	isoprenoid biosynthetic process | carboxy-lyase activity	NP_001234815.1	AT3G54250.1
Solyc11g010210	SL3.0ch11	3282048	3284048	-	4589	8492	3863	7971	35.081	32.643	-2.43818	4.62511e-05	7.19584	-1.1984	0.00137392	0.0301671	Yes	meth_hypo_RNA_up	WEB family protein, chloroplastic	0	0	XP_004250513.1	AT4G40020.1
Solyc11g010350	SL3.0ch11	3421469	3423469	+	3505	7226	3045	6708	32.662	31.221	-1.44122	0.0155074	2.0603	2.66157	7.42527e-05	0.00316175	No	meth_hypo_RNA_up	Glucan 1,3-beta-glucosidase	GO:0007015|GO:0051015	actin filament organization | actin filament binding	XP_004250125.1	0
Solyc11g010390	SL3.0ch11	3466807	3468807	-	1687	9036	1303	7867	15.733	14.209	-1.52316	0.00195606	1.60684	5.24275	0.00140016	0.0306681	No	meth_hypo_RNA_up	LOW QUALITY:Arabinogalactan-protein	0	0	XP_010312897.1	0
[truncated: 59 more rows]

## Sheet: PHYB1B2_DMP_DE_IG_All
Supplementary Table 17. DMPs in all mC contexts associated with DEGs
[truncated: 409 more rows]

## Sheet: PHYB1B2_DMP_DE_BK_All
Supplementary Table 17. DMPs in all mC contexts associated with DEGs
[truncated: 1,836 more rows]
