# Supplementary material for: Phytochrome-Mediated Light Perception Affects Fruit Development and Ripening Through Epigenetic Mechanisms
Source: Front Plant Sci. 2022 Apr 28;13:870974. doi: 10.3389/fpls.2022.870974 (PMC9096621; doi:10.3389/fpls.2022.870974)
Supplement: Supplementary file 15 [file Data_Sheet_15.XLSX]

## Sheet: 01_Photosynthesis
Supplementary Table 18. Mapman categories of DMPs with present DEGs between phyA_IG and WT_IG.
BinCode	BinName	id	type	description	PHYA_DMP_DE_IG_All.txt
1.1.1.1.1	Photosynthesis.photophosphorylation.photosystem II.LHC-II complex.component LHCb1/2/3	solyc02g070940	Transcript	component LHCb1/2/3 of LHC-II complex (original description: Chlorophyll a-b binding protein, chloroplastic (AHRD V3.3 *** Q41422_SOLTU)) &	1.79954
1.1.1.1.1	Photosynthesis.photophosphorylation.photosystem II.LHC-II complex.component LHCb1/2/3	solyc03g005760	Transcript	component LHCb1/2/3 of LHC-II complex (original description: chlorophyll a/b-binding protein) &	-2.8276
1.1.1.1.1	Photosynthesis.photophosphorylation.photosystem II.LHC-II complex.component LHCb1/2/3	solyc03g005770	Transcript	component LHCb1/2/3 of LHC-II complex (original description: chlorophyll a/b-binding protein) &	-2.27658
1.1.1.1.1	Photosynthesis.photophosphorylation.photosystem II.LHC-II complex.component LHCb1/2/3	solyc03g005780	Transcript	component LHCb1/2/3 of LHC-II complex (original description: chlorophyll a/b-binding protein Cab-3C) &	12.7331
1.1.1.1.3	Photosynthesis.photophosphorylation.photosystem II.LHC-II complex.component LHCb5	solyc06g063370	Transcript	component LHCb5 of LHC-II complex (original description: Type I (26 kD) CP29 polypeptide) &	6.71941
1.1.1.2.9	Photosynthesis.photophosphorylation.photosystem II.PS-II complex.component PsbR	solyc12g017250	Transcript	component PsbR of PS-II complex (original description: Photosystem II 10 kDa polypeptide family protein (AHRD V3.3 *** A9PH94_POPTR)) &	3.08388
1.2.1.3.2	Photosynthesis.calvin cycle.ribulose-1,5-bisphosphat carboxylase/oxygenase (RuBisCo) activity.RuBisCo regulation.ATP-dependent activase (RCA)	solyc09g011080	Transcript	ATP-dependent activase involved in RuBisCo regulation (original description: Ribulose bisphosphate carboxylase/oxygenase activase (AHRD V3.3 *** V9IMY5_NICAT)) &	-2.76771

## Sheet: 02__Cellular_respiration
Supplementary Table 18. Mapman categories of DMPs with present DEGs between phyA_IG and WT_IG.
BinCode	BinName	id	type	description	PHYA_DMP_DE_IG_All.txt
2.1.1.1.1	Cellular respiration.glycolysis.cytosolic glycolysis.phosphofructokinase activities.ATP-dependent phosphofructokinase	solyc05g024230	Id	no hits & (original description: ATP-dependent 6-phosphofructokinase (AHRD V3.3 *-* A0A0V0IM90_SOLCH))	5.03095
2.4.1	Cellular respiration.oxidative phosphorylation.NADH dehydrogenase complex	solyc12g035223	Id	no hits & (original description: Cytochrome b561 and DOMON domain-containing protein At5g35735 (AHRD V3.3 --* B561P_ARATH))	12.0161
2.4.1.4.1	Cellular respiration.oxidative phosphorylation.NADH dehydrogenase complex.non-core components.alpha subcomplex	solyc03g006540	Id	no hits & (original description: NADH-ubiquinone oxidoreductase 75 kDa subunit, mitochondrial (AHRD V3.3 *-* N1QXW8_AEGTA))	1.12278

## Sheet: 03_Carbohydrate_metabolism
Supplementary Table 18. Mapman categories of DMPs with present DEGs between phyA_IG and WT_IG.
BinCode	BinName	id	type	description	PHYA_DMP_DE_IG_All.txt
3.1.4.1	Carbohydrate metabolism.sucrose metabolism.degradation.invertase activities	solyc03g083770	Id	(original description: Plant invertase/pectin methylesterase inhibitor superfamily protein (AHRD V3.3 *** AT5G62360.1)) & 21 kDa protein OS=Daucus carota (sp|p17407|21kd_dauca : 149.0)	-3.8619

## Sheet: 04_Amino_acid_metabolism
Supplementary Table 18. Mapman categories of DMPs with present DEGs between phyA_IG and WT_IG.
BinCode	BinName	id	type	description	PHYA_DMP_DE_IG_All.txt
4.1.2.2.6.3.1	Amino acid metabolism.biosynthesis.aspartate family.aspartate-derived amino acids.methionine.S-methylmethionine cycle.homocysteine S-methyltransferase	solyc09g082460	Transcript	homocysteine S-methyltransferase (original description: Homocysteine S-methyltransferase (AHRD V3.3 *** M1P405_PRUPE)) &	5.22385

## Sheet: 05_Lipid_metabolism
Supplementary Table 18. Mapman categories of DMPs with present DEGs between phyA_IG and WT_IG.
BinCode	BinName	id	type	description	PHYA_DMP_DE_IG_All.txt
5.1	Lipid metabolism.fatty acid biosynthesis	solyc03g045140	Id	(original description: Cyclopropane-fatty-acyl-phospholipid synthase (AHRD V3.3 *** AT3G23530.1)) & Probable (S)-tetrahydroprotoberberine N-methyltransferase 2 OS=Papaver bracteatum (sp|c3sbu4|tnmt2_papbr : 94.7)	1.11392
5.1.7.1	Lipid metabolism.fatty acid biosynthesis.fatty acid desaturation.stearoyl-ACP desaturase	solyc06g059720	Transcript	stearoyl-ACP desaturase (original description: Acyl-[acyl-carrier-protein] desaturase (AHRD V3.3 *** A0A118HPD5_CYNCS)) &	6.36226
5.1.7.3	Lipid metabolism.fatty acid biosynthesis.fatty acid desaturation.omega-3/omega-6 fatty acid desaturase (FAD2/3/6-8)	solyc12g100260	Transcript	omega-3/omega-6 fatty acid desaturase (original description: Fatty acid desaturase (AHRD V3.3 *-* B3SP99_CAPAN)) &	-1.55516

## Sheet: 06_Nucleotide_metabolism
Supplementary Table 18. Mapman categories of DMPs with present DEGs between phyA_IG and WT_IG.
BinCode	BinName	id	type	description	PHYA_DMP_DE_IG_All.txt

## Sheet: 07_Coenzyme_metabolism
Supplementary Table 18. Mapman categories of DMPs with present DEGs between phyA_IG and WT_IG.
BinCode	BinName	id	type	description	PHYA_DMP_DE_IG_All.txt

## Sheet: 08_Polyamine_metabolism
Supplementary Table 18. Mapman categories of DMPs with present DEGs between phyA_IG and WT_IG.
BinCode	BinName	id	type	description	PHYA_DMP_DE_IG_All.txt

## Sheet: 09_Secondary_metabolism
Supplementary Table 18. Mapman categories of DMPs with present DEGs between phyA_IG and WT_IG.
BinCode	BinName	id	type	description	PHYA_DMP_DE_IG_All.txt
9.2.2.6.1	Secondary metabolism.phenolics.flavonoid biosynthesis.flavonol glycosides.flavonol 3-O-glycosyltransferase	solyc01g107830	Transcript	flavonol 3-O-glycosyltransferase (original description: Glycosyltransferase (AHRD V3.3 *** K4B2Z9_SOLLC)) &	6.09772

## Sheet: 10_Redox_homeostasis
Supplementary Table 18. Mapman categories of DMPs with present DEGs between phyA_IG and WT_IG.
BinCode	BinName	id	type	description	PHYA_DMP_DE_IG_All.txt
10	Redox homeostasis	solyc08g078460	Id	no hits & (original description: Oxidoreductase family protein (AHRD V3.3 *** AT4G17370.1))	-1.75354
10	Redox homeostasis	solyc02g070110	Id	Enzyme classification.EC_1 oxidoreductases.EC_1.1 oxidoreductase acting on CH-OH group of donor(50.1.1 : 518.8) & Berberine bridge enzyme-like 28 OS=Arabidopsis thaliana (sp|q9fi21|bbe28_arath : 496.0) (original description: FAD-binding Berberine family protein (AHRD V3.3 *** A0A061GF79_THECC)) &	1.4059
10.1	Redox homeostasis.reactive oxygen generation	solyc03g034140	Id	(original description: Quinone reductase family protein (AHRD V3.3 *** AT4G36750.1)) & Probable NAD(P)H dehydrogenase (quinone) FQR1-like 2 OS=Arabidopsis thaliana (sp|o23207|fqrl2_arath : 307.0)	2.09077
10.1.1	Redox homeostasis.reactive oxygen generation.NADPH-oxidase (Rboh)	solyc05g025683	Transcript	NADPH-oxidase (Rboh) (original description: Respiratory burst oxidase, putative (AHRD V3.3 *-* B9RR53_RICCO)) &	2.82368
10.5.7	Redox homeostasis.chloroplast redox homeostasis.atypical thioredoxin (ACHT)	solyc03g115870	Transcript	atypical thioredoxin (ACHT) (original description: Thioredoxin (AHRD V3.3 *** A0A072UTZ5_MEDTR)) &	-5.66238

[truncated: 19 more sheets: 11_Phytohormone_action, 12_Chromatin_organisation, 13_Cell_cycle_organisation, 14_DNA_damage_response, 15_RNA_biosynthesis, 16_RNA_processing, 17_Protein_biosynthesis, 18_Protein_modification, 19_Protein_homeostasis, 20_Cytoskeleton_organisation, 21_Cell_wall_organisation, 22_Vesicle_trafficking, 23_Protein_translocation, 24_Solute_transport, 25_Nutrient_uptake, 26_External_stimuli_response, 27_Multi-process_regulation, 35_not_assigned, 50_Enzyme_classification]
