# Supplementary material for: Phytochrome-Mediated Light Perception Affects Fruit Development and Ripening Through Epigenetic Mechanisms
Source: Front Plant Sci. 2022 Apr 28;13:870974. doi: 10.3389/fpls.2022.870974 (PMC9096621; doi:10.3389/fpls.2022.870974)
Supplement: Supplementary file 16 [file Table_1.XLSX]

## Sheet: 01_Photosynthesis
Supplementary Table 19. Mapman categories of DMPs with present DEGs between phyB1B2_IG and WT_IG.
BinCode	BinName	id	type	description	PHYB1B2_DMP_DE_IG_All.txt
1.1.1.1.1	Photosynthesis.photophosphorylation.photosystem II.LHC-II complex.component LHCb1/2/3	solyc03g005780	Transcript	component LHCb1/2/3 of LHC-II complex (original description: chlorophyll a/b-binding protein Cab-3C) &	13.2059
1.1.1.3.12	Photosynthesis.photophosphorylation.photosystem II.assembly and maintenance.assembly factor (Psb32)	solyc01g098640	Transcript	Psb32 protein involved in PS-II assembly (original description: Thylakoid lumen 18.3 kDa protein (AHRD V3.3 *** A0A061F263_THECC)) &	6.686
1.1.1.2.9	Photosynthesis.photophosphorylation.photosystem II.PS-II complex.component PsbR	solyc12g017250	Transcript	component PsbR of PS-II complex (original description: Photosystem II 10 kDa polypeptide family protein (AHRD V3.3 *** A9PH94_POPTR)) &	6.41162
1.3.3.1	Photosynthesis.photorespiration.aminotransferase activities.glutamate-glyoxylate transaminase	solyc01g007940	Transcript	glutamate-glyoxylate transaminase (original description: Alanine aminotransferase 2 (AHRD V3.3 *** A0A151TGW4_CAJCA)) &	5.90832
1.1.8.1.4.2	Photosynthesis.photophosphorylation.chlororespiration.NADH dehydrogenase-like (NDH) complex.lumen subcomplex L.component PnsL2/PQL1	solyc05g007780	Transcript	component PnsL2/PQL1 of NDH lumen subcomplex L (original description: Photosynthetic NDH subcomplex L 2 (AHRD V3.3 *** A0A0F7GYP0_9ROSI)) &	5.61659
1.2.7	Photosynthesis.calvin cycle.transketolase	solyc10g018300	Transcript	transketolase (original description: Transketolase (AHRD V3.3 *** AT3G60750.1)) &	5.48555
1.3.4.4	Photosynthesis.photorespiration.glycine decarboxylase complex.lipoamide-containing component H-protein	solyc08g007040	Transcript	lipoamide-containing component H-protein of glycine cleavage system (original description: Glycine cleavage system h protein (AHRD V3.3 *** A0A0A0LI67_CUCSA)) &	5.09227
1.2.1.3.3	Photosynthesis.calvin cycle.ribulose-1,5-bisphosphat carboxylase/oxygenase (RuBisCo) activity.RuBisCo regulation.xylulose-1,5-bisphosphate phosphatase (CbbY)	solyc03g111610	Transcript	xylulose-1,5-bisphosphate phosphatase (CbbY) (original description: Haloacid dehalogenase-like hydrolase (HAD) superfamily protein (AHRD V3.3 *** AT3G48420.1)) &	4.88019
1.1.1.2	Photosynthesis.photophosphorylation.photosystem II.PS-II complex	solyc04g015140	Transcript	no hits & (original description: Low PSII Accumulation 3 (AHRD V3.3 --* AT1G73060.1))	3.76783
1.1.1.1.1	Photosynthesis.photophosphorylation.photosystem II.LHC-II complex.component LHCb1/2/3	solyc07g063600	Transcript	component LHCb1/2/3 of LHC-II complex (original description: Chlorophyll a-b binding protein, chloroplastic (AHRD V3.3 *** M1BNX7_SOLTU)) &	3.6149
1.1.1.1.1	Photosynthesis.photophosphorylation.photosystem II.LHC-II complex.component LHCb1/2/3	solyc02g070990	Transcript	component LHCb1/2/3 of LHC-II complex (original description: Chlorophyll a-b binding protein, chloroplastic (AHRD V3.3 *** K4B877_SOLLC)) &	3.53448
1.1.1.1.1	Photosynthesis.photophosphorylation.photosystem II.LHC-II complex.component LHCb1/2/3	solyc02g070940	Transcript	component LHCb1/2/3 of LHC-II complex (original description: Chlorophyll a-b binding protein, chloroplastic (AHRD V3.3 *** Q41422_SOLTU)) &	3.48785
1.1.5.2.1	Photosynthesis.photophosphorylation.linear electron flow.ferredoxin-NADP reductase (FNR) activity.ferredoxin-NADP oxidoreductase	solyc02g083810	Transcript	ferredoxin-NADP oxidoreductase (original description: Ferredoxin--NADP reductase (AHRD V3.3 *** A0A0V0I3W8_SOLCH)) &	3.02228
1.1.1.1.1	Photosynthesis.photophosphorylation.photosystem II.LHC-II complex.component LHCb1/2/3	solyc03g005770	Transcript	component LHCb1/2/3 of LHC-II complex (original description: chlorophyll a/b-binding protein) &	2.94235
1.1.1.1.3	Photosynthesis.photophosphorylation.photosystem II.LHC-II complex.component LHCb5	solyc06g063370	Transcript	component LHCb5 of LHC-II complex (original description: Type I (26 kD) CP29 polypeptide) &	2.84811
1.1.5.1	Photosynthesis.photophosphorylation.linear electron flow.ferredoxin electron carrier	solyc11g068430	Transcript	ferredoxin electron carrier (original description: Ferredoxin family protein (AHRD V3.3 *** B9HQ08_POPTR)) &	2.80228
1.1.1.1.1	Photosynthesis.photophosphorylation.photosystem II.LHC-II complex.component LHCb1/2/3	solyc03g005760	Transcript	component LHCb1/2/3 of LHC-II complex (original description: chlorophyll a/b-binding protein) &	2.39751
1.1.1.1.1	Photosynthesis.photophosphorylation.photosystem II.LHC-II complex.component LHCb1/2/3	solyc02g070950	Transcript	component LHCb1/2/3 of LHC-II complex (original description: Chlorophyll a-b binding protein, chloroplastic (AHRD V3.3 *** Q41422_SOLTU)) &	2.3507
1.2.8	Photosynthesis.calvin cycle.sedoheptulose-1,7-bisphosphatase	solyc05g052600	Transcript	sedoheptulose-1,7-bisphosphatase (original description: Sedoheptulose-1,7-bisphosphatase (AHRD V3.3 *** G7JAP0_MEDTR)) &	2.31908
1.1.1.2.2.1	Photosynthesis.photophosphorylation.photosystem II.PS-II complex.oxygen-evolving center (OEC) extrinsic proteins.component OEC33/PsbO	solyc02g065400	Transcript	component PsbO/OEC33 of PS-II oxygen-evolving center (original description: 33kDa precursor protein of oxygen-evolving complex) &	2.00016
1.2	Photosynthesis.calvin cycle	solyc01g079470	Id	(original description: CP12 (AHRD V3.3 *** O24136_TOBAC)) & Calvin cycle protein CP12-1, chloroplastic OS=Arabidopsis thaliana (sp|o22914|cp121_arath : 85.9)	1.51311
1.1.5.2.2.1	Photosynthesis.photophosphorylation.linear electron flow.ferredoxin-NADP reductase (FNR) activity.FNR membrane-tethering.FNR-recruitment protein (TROL)	solyc10g009570	Transcript	TROL protein involved in ferredoxin-NADP oxidoreductase membrane-tethering (original description: thylakoid rhodanese-like protein (AHRD V3.3 *** AT4G01050.1)) &	1.42498
1.3.3.2	Photosynthesis.photorespiration.aminotransferase activities.serine-glyoxylate transaminase	solyc12g099930	Transcript	serine-glyoxylate transaminase (original description: alanine:glyoxylate aminotransferase (AHRD V3.3 *** AT2G13360.3)) &	1.07526
1.1.8.1.3.5	Photosynthesis.photophosphorylation.chlororespiration.NADH dehydrogenase-like (NDH) complex.subcomplex B.component PnsB5/NDH18	solyc09g083190	Transcript	component PnsB5/NDH18 of NDH subcomplex B (original description: NAD(P)H dehydrogenase 18 (AHRD V3.3 *** A0A061ELZ4_THECC)) &	-0.901225
1.1.4.2.8	Photosynthesis.photophosphorylation.photosystem I.PS-I complex.component PsaH	solyc12g044280	Transcript	component PsaH of PS-I complex (original description: Photosystem I reaction center subunit VI (AHRD V3.3 *** B7FN63_MEDTR)) &	-1.14947
1.1.1.1.2	Photosynthesis.photophosphorylation.photosystem II.LHC-II complex.component LHCb4	solyc09g014520	Transcript	component LHCb4 of LHC-II complex (original description: Chlorophyll a-b binding protein, chloroplastic (AHRD V3.3 *** K4CRS9_SOLLC)) &	-1.31563
1.1.1.1.1	Photosynthesis.photophosphorylation.photosystem II.LHC-II complex.component LHCb1/2/3	solyc02g071000	Transcript	component LHCb1/2/3 of LHC-II complex (original description: Chlorophyll a-b binding protein, chloroplastic (AHRD V3.3 *** K4B878_SOLLC)) &	-3.60361
1.1.1.1.1	Photosynthesis.photophosphorylation.photosystem II.LHC-II complex.component LHCb1/2/3	solyc02g070970	Transcript	component LHCb1/2/3 of LHC-II complex (original description: Chlorophyll a-b binding protein, chloroplastic (AHRD V3.3 *** Q41422_SOLTU)) &	-3.96606
1.1.4.1.1	Photosynthesis.photophosphorylation.photosystem I.LHC-I complex.component LHCa1	solyc05g056070	Transcript	component LHCa1 of LHC-I complex (original description: photosystem 1 protein) &	-5.1342
1.1.1.3	Photosynthesis.photophosphorylation.photosystem II.assembly and maintenance	solyc11g008480	Id	(original description: Photosystem II reaction center PsbP family protein (AHRD V3.3 *** AT3G05410.2)) & PsbP domain-containing protein 7, chloroplastic OS=Arabidopsis thaliana (sp|f4j7a7|ppd7_arath : 319.0)	-6.37211
1.12.6.2	Photosynthesis.tetrapyrrol biosynthesis.chlorophyll metabolism.Mg-protoporphyrin IX O-methyltransferase	solyc03g118240	Transcript	Mg-protoporphyrin IX O-methyltransferase (original description: Magnesium-protoporphyrin O-methyltransferase (AHRD V3.3 *** A0A0B0NE87_GOSAR)) &	6.14311
1.12.6.5.1	Photosynthesis.tetrapyrrol biosynthesis.chlorophyll metabolism.protochlorophyllide oxidoreductase (POR) activities.light-dependent POR	solyc12g013710	Transcript	light-dependent protochlorophyllide oxidoreductase (original description: light dependent NADH:protochlorophyllide oxidoreductase 1) &	2.68839

## Sheet: 02_Cellular_respiration
Supplementary Table 19. Mapman categories of DMPs with present DEGs between phyB1B2_IG and WT_IG.
BinCode	BinName	id	type	description	PHYB1B2_DMP_DE_IG_All.txt
2.1.1.1.1	Cellular respiration.glycolysis.cytosolic glycolysis.phosphofructokinase activities.ATP-dependent phosphofructokinase	solyc05g024230	Id	no hits & (original description: ATP-dependent 6-phosphofructokinase (AHRD V3.3 *-* A0A0V0IM90_SOLCH))	13.5742
2.3.6.1.2	Cellular respiration.tricarboxylic acid cycle.succinate dehydrogenase complex.components.iron-sulphur component SDH2	solyc04g055030	Transcript	iron-sulphur component SDH2 of succinate dehydrogenase complex (original description: Succinate dehydrogenase [ubiquinone] iron-sulfur subunit, mitochondrial (AHRD V3.3 *** K4BSQ1_SOLLC)) &	6.37625

## Sheet: 03_Carbohydrate_metabolism
Supplementary Table 19. Mapman categories of DMPs with present DEGs between phyB1B2_IG and WT_IG.
BinCode	BinName	id	type	description	PHYB1B2_DMP_DE_IG_All.txt
3.1	Carbohydrate metabolism.sucrose metabolism	solyc02g063000	Id	Anthocyanidin 3-O-glucosyltransferase 5 OS=Manihot esculenta (sp|q40287|ufog5_manes : 458.0) & Enzyme classification.EC_2 transferases.EC_2.4 glycosyltransferase(50.2.4 : 356.6) (original description: Glycosyltransferase (AHRD V3.3 *** K4B6I8_SOLLC)) &	2.29701
3.1	Carbohydrate metabolism.sucrose metabolism	solyc12g088700	Id	Scopoletin glucosyltransferase OS=Nicotiana tabacum (sp|q9at54|scgt_tobac : 334.0) & Enzyme classification.EC_2 transferases.EC_2.4 glycosyltransferase(50.2.4 : 187.3) (original description: Glycosyltransferase (AHRD V3.3 *** M1B8Y5_SOLTU)) &	1.54638
3.1.2.4	Carbohydrate metabolism.sucrose metabolism.biosynthesis.cytosolic phosphoglucose isomerase	solyc12g098130	Id	no hits & (original description: Glucose-6-phosphate isomerase, cytosolic 1 (AHRD V3.3 --* G6PI1_CLARO))	3.07381
3.1.4.1	Carbohydrate metabolism.sucrose metabolism.degradation.invertase activities	solyc03g083770	Id	(original description: Plant invertase/pectin methylesterase inhibitor superfamily protein (AHRD V3.3 *** AT5G62360.1)) & 21 kDa protein OS=Daucus carota (sp|p17407|21kd_dauca : 149.0)	-1.53741
3.2.3.5.2	Carbohydrate metabolism.starch metabolism.degradation.maltose metabolism.cytosolic alpha-glucan phosphorylase	solyc09g031970	Transcript	cytosolic alpha-glucan phosphorylase (original description: Alpha-1,4 glucan phosphorylase (AHRD V3.3 *** K4CSQ2_SOLLC)) &	3.88253
3.4.2	Carbohydrate metabolism.oligosaccharide metabolism.raffinose synthase	solyc02g086530	Transcript	raffinose synthase (original description: Raffinose synthase family protein (AHRD V3.3 *** AT5G40390.1)) &	5.08234
3.11.1.2	Carbohydrate metabolism.fermentation.alcoholic fermentation.alcohol dehydrogenase	solyc04g064710	Transcript	alcohol dehydrogenase (original description: Alcohol dehydrogenase (AHRD V3.3 *** Q42953_TOBAC)) &	5.3433
3.13.2.1.1	Carbohydrate metabolism.nucleotide sugar biosynthesis.GDP-L-fucose biosynthesis.de novo biosynthesis.GDP-D-mannose 4,6-dehydratase (MUR1)	solyc02g084210	Transcript	GDP-D-mannose 4,6-dehydratase (MUR1) (original description: GDP-mannose 4,6 dehydratase 1 (AHRD V3.3 *** GMD1_ARATH)) &	12.2201

## Sheet: 04_Amino_acid_metabolism
Supplementary Table 19. Mapman categories of DMPs with present DEGs between phyB1B2_IG and WT_IG.
BinCode	BinName	id	type	description	PHYB1B2_DMP_DE_IG_All.txt
4.1.2.1.4	Amino acid metabolism.biosynthesis.aspartate family.asparagine.omega-amidase	solyc07g041280	Transcript	omega-amidase (original description: Nitrilase/cyanide hydratase and apolipoprotein N-acyltransferase family protein (AHRD V3.3 *** AT5G12040.1)) &	5.26602
4.1.2.2.6.3.1	Amino acid metabolism.biosynthesis.aspartate family.aspartate-derived amino acids.methionine.S-methylmethionine cycle.homocysteine S-methyltransferase	solyc09g082460	Transcript	homocysteine S-methyltransferase (original description: Homocysteine S-methyltransferase (AHRD V3.3 *** M1P405_PRUPE)) &	5.85947
4.1.2.2.8.1	Amino acid metabolism.biosynthesis.aspartate family.aspartate-derived amino acids.isoleucine.threonine deaminase	solyc09g008670	Transcript	threonine deaminase (original description: threonine deaminase) &	-4.43104

## Sheet: 05_Lipid_metabolism
Supplementary Table 19. Mapman categories of DMPs with present DEGs between phyB1B2_IG and WT_IG.
BinCode	BinName	id	type	description	PHYB1B2_DMP_DE_IG_All.txt
5.1.2.2.3	Lipid metabolism.fatty acid biosynthesis.acetyl-CoA generation.plastidial pyruvate dehydrogenase complex.dihydrolipoamide dehydrogenase component E3	solyc05g053100	Transcript	dihydrolipoamide dehydrogenase component E3 of plastidial pyruvate dehydrogenase complex (original description: Dihydrolipoyl dehydrogenase (AHRD V3.3 *** W9QVW5_9ROSA)) &	3.24208
5.1.7.1	Lipid metabolism.fatty acid biosynthesis.fatty acid desaturation.stearoyl-ACP desaturase	solyc06g059720	Transcript	stearoyl-ACP desaturase (original description: Acyl-[acyl-carrier-protein] desaturase (AHRD V3.3 *** A0A118HPD5_CYNCS)) &	8.48743
5.3.3	Lipid metabolism.galactolipid and sulfolipid biosynthesis.digalactosyldiacylglycerol synthase (DGD)	solyc01g007100	Transcript	digalactosyldiacylglycerol synthase (original description: Digalactosyldiacylglycerol synthase 1 (AHRD V3.3 *** W8SVK3_TOBAC)) &	3.70627
5.4.10	Lipid metabolism.sphingolipid biosynthesis.sphingolipid fatty acid 2-hydroxylase	solyc02g022890	Transcript	sphingolipid fatty acid 2-hydroxylase (original description: Fatty acid 2-hydroxylase (AHRD V3.3 *** A0A1D1ZHT2_9ARAE)) &	-1.50654
5.5.1.1	Lipid metabolism.phytosterol biosynthesis.campesterol.sterol C-24 methyltransferase	solyc01g111900	Id	Acetylserotonin O-methyltransferase OS=Arabidopsis thaliana (sp|q9t003|asmt_arath : 297.0) & Enzyme classification.EC_2 transferases.EC_2.1 transferase transferring one-carbon group(50.2.1 : 215.9) (original description: O-methyltransferase, putative (AHRD V3.3 *** B9SUX6_RICCO)) &	10.2588
5.5.1.1	Lipid metabolism.phytosterol biosynthesis.campesterol.sterol C-24 methyltransferase	solyc02g077520	Id	Probable O-methyltransferase 3 OS=Humulus lupulus (sp|b0zb57|omt3_humlu : 382.0) & Enzyme classification.EC_2 transferases.EC_2.1 transferase transferring one-carbon group(50.2.1 : 190.6) (original description: O-methyltransferase, putative (AHRD V3.3 *** B9S932_RICCO)) &	4.59915
5.5.1.7	Lipid metabolism.phytosterol biosynthesis.campesterol.sterol delta24 reductase	solyc02g069490	Transcript	sterol delta24 reductase (original description: Sterol reductase (AHRD V3.3 *** E1VD17_SOLTU)) &	-0.78248
5.5.2.1	Lipid metabolism.phytosterol biosynthesis.phytosterol conjugation.methylsterol monooxygenase	solyc01g091320	Transcript	methylsterol monooxygenase (original description: sterol C4-methyl oxidase 1-2 (AHRD V3.3 *** AT4G22756.1)) &	0.770214
5.7.2.1.1	Lipid metabolism.lipid degradation.phospholipase activities.phospholipase A1 activities.phospholipase A1 (PC-PLA1)	solyc11g065530	Transcript	phospholipase A1 (PC-PLA1) (original description: alpha/beta-Hydrolases superfamily protein (AHRD V3.3 *** AT1G51440.1)) &	1.02023
5.7.2.1.1	Lipid metabolism.lipid degradation.phospholipase activities.phospholipase A1 activities.phospholipase A1 (PC-PLA1)	solyc12g010910	Transcript	phospholipase A1 (PC-PLA1) (original description: alpha/beta-Hydrolases superfamily protein (AHRD V3.3 *** AT2G42690.1)) &	3.23911
5.7.3.6.3	Lipid metabolism.lipid degradation.fatty acid degradation.glyoxylate cycle.isocitrate lyase	solyc07g052480	Transcript	isocitrate lyase (original description: isocitrate lyase LEU18678) &	-1.11267
5.8.2.1	Lipid metabolism.lipid trafficking.endoplasmic reticulum-plastid lipid transfer.phospholipid transverse translocation	solyc01g005290	Id	no hits & (original description: Sec14p-like phosphatidylinositol transfer family protein (AHRD V3.3 *-* AT1G14820.3))	-2.65525
5.9.2	Lipid metabolism.lipid bodies-associated activities.oleosin structural protein	solyc06g034040	Transcript	oleosin (original description: Oleosin (AHRD V3.3 *** K4C4M8_SOLLC)) &	4.41674
5.9.2	Lipid metabolism.lipid bodies-associated activities.oleosin structural protein	solyc12g010920	Transcript	oleosin (original description: Oleosin (AHRD V3.3 *** K4DCH8_SOLLC)) &	3.8314
5.9.3	Lipid metabolism.lipid bodies-associated activities.caleosin lipid body surface protein (CLO/PXG)	solyc12g096930	Transcript	caleosin (original description: Caleosin (AHRD V3.3 *** S8C3C9_9LAMI)) &	4.36567

## Sheet: 06_Nucleotide_metabolism
Supplementary Table 19. Mapman categories of DMPs with present DEGs between phyB1B2_IG and WT_IG.
BinCode	BinName	id	type	description	PHYB1B2_DMP_DE_IG_All.txt
6.1.1.1	Nucleotide metabolism.purines.ribonucleotide (RN) anabolism.phosphoribosyldiphosphate 5-amidotransferase	solyc01g110510	Transcript	phosphoribosyldiphosphate 5-amidotransferase (original description: ENTH/VHS family protein (AHRD V3.3 *** A0A061GXX0_THECC)) &	-4.83431

## Sheet: 07_Coenzyme_metabolism
Supplementary Table 19. Mapman categories of DMPs with present DEGs between phyB1B2_IG and WT_IG.
BinCode	BinName	id	type	description	PHYB1B2_DMP_DE_IG_All.txt
7	Coenzyme metabolism	solyc03g025720	Id	(original description: 4-coumarate:CoA ligase-like protein (AHRD V3.3 *** A0A0A1ETC4_ALBBR)) & Oxalate--CoA ligase OS=Arabidopsis thaliana (sp|q9smt7|4clla_arath : 793.0)	5.49721
7.8.1.1	Coenzyme metabolism.prenylquinone biosynthesis.4-hydroxybenzoate biosynthesis.p-coumarate:CoA ligase	solyc06g068650	Transcript	p-coumarate:CoA ligase (original description: 4-coumarate--CoA ligase) &	-1.1276

## Sheet: 08_Polyamine_metabolism
Supplementary Table 19. Mapman categories of DMPs with present DEGs between phyB1B2_IG and WT_IG.
BinCode	BinName	id	type	description	PHYB1B2_DMP_DE_IG_All.txt
8.2.4	Polyamine metabolism.spermidine biosynthesis.thermospermine synthase	solyc08g061970	Transcript	thermospermine synthase (original description: putative spermine synthase) &	4.43769

## Sheet: 09_Secondary_metabolism
Supplementary Table 19. Mapman categories of DMPs with present DEGs between phyB1B2_IG and WT_IG.
BinCode	BinName	id	type	description	PHYB1B2_DMP_DE_IG_All.txt
9.1.6.2.1.3	Secondary metabolism.terpenoids.carotenoid biosynthesis.xanthophylls.carotenoid hydroxylase activities.carotenoid epsilon-ring hydroxylase (LUT1)	solyc10g083795	Transcript	carotenoid epsilon ring hydroxylase (original description: Cytochrome P450, putative (AHRD V3.3 *** B9S0A8_RICCO)) &	6.64217
9.2.1.1.2	Secondary metabolism.phenolics.p-coumaroyl-CoA biosynthesis.phenylalanine ammonia lyase activity.proteolytic phenylalanine ammonia-lyase regulator (KFB-PAL)	solyc06g066770	Transcript	proteolytic phenylalanine ammonia-lyase regulator (KFB-PAL) (original description: Kelch repeat-containing F-box family protein (AHRD V3.3 *** B9GEJ8_POPTR)) &	-5.58299
9.2.2.6.1	Secondary metabolism.phenolics.flavonoid biosynthesis.flavonol glycosides.flavonol 3-O-glycosyltransferase	solyc01g107830	Transcript	flavonol 3-O-glycosyltransferase (original description: Glycosyltransferase (AHRD V3.3 *** K4B2Z9_SOLLC)) &	-1.52606
9.5	Secondary metabolism.glucosinolates	solyc02g084410	Id	no hits & (original description: Lactoylglutathione lyase / glyoxalase I family protein (AHRD V3.3 *** A0A061DGQ7_THECC))	1.26916

## Sheet: 10_Redox_homeostasis
Supplementary Table 19. Mapman categories of DMPs with present DEGs between phyB1B2_IG and WT_IG.
BinCode	BinName	id	type	description	PHYB1B2_DMP_DE_IG_All.txt
10	Redox homeostasis	solyc05g008290	Id	Multicopper oxidase LPR1 OS=Arabidopsis thaliana (sp|f4i4k5|lpr1_arath : 800.0) & Enzyme classification.EC_1 oxidoreductases.EC_1.10 oxidoreductase acting on diphenol or related substance as donor(50.1.10 : 31.2) (original description: Cupredoxin superfamily protein (AHRD V3.3 *** AT1G23010.1)) &	-1.05135
10.1	Redox homeostasis.reactive oxygen generation	solyc03g034140	Id	(original description: Quinone reductase family protein (AHRD V3.3 *** AT4G36750.1)) & Probable NAD(P)H dehydrogenase (quinone) FQR1-like 2 OS=Arabidopsis thaliana (sp|o23207|fqrl2_arath : 307.0)	3.38881
10.3.1	Redox homeostasis.low-molecular-weight scavengers.ascorbate biosynthesis	solyc02g065170	Id	L-ascorbate oxidase homolog OS=Brassica napus (sp|q00624|asol_brana : 595.0) & Enzyme classification.EC_1 oxidoreductases.EC_1.10 oxidoreductase acting on diphenol or related substance as donor(50.1.10 : 124.4) (original description: L-ascorbate oxidase like (AHRD V3.3 *** A0A0B2RUS1_GLYSO)) &	4.47669
10.4.1.1	Redox homeostasis.hydrogen peroxide removal.ascorbate-glutathione cycle.ascorbate peroxidase (APX)	solyc04g074640	Transcript	ascorbate peroxidase (APX) (original description: Ascorbate peroxidase (AHRD V3.3 *** W8E036_JATCU)) &	0.972562
10.4.3.1	Redox homeostasis.hydrogen peroxide removal.peroxiredoxin activities.1-Cys peroxiredoxin (1-CysPrx)	solyc03g096040	Transcript	1-Cys peroxiredoxin (1-CysPrx) (original description: 1-Cys peroxiredoxin (AHRD V3.3 *** REHY_MEDTR)) &	5.2305
10.5.7	Redox homeostasis.chloroplast redox homeostasis.atypical thioredoxin (ACHT)	solyc06g069720	Transcript	atypical thioredoxin (ACHT) (original description: Thioredoxin-like protein (AHRD V3.3 *** T2DNK5_PHAVU)) &	2.13977

[truncated: 19 more sheets: 11_Phytohormone_action, 12_Chromatin_organisation, 13_Cell_cycle_organisation, 14_DNA_damage_response, 15_RNA_biosynthesis, 16_RNA_processing, 17_Protein_biosynthesis, 18_Protein_modification, 19_Protein_homeostasis, 20_Cytoskeleton_organisation, 21_Cell_wall_organisation, 22_Vesicle_trafficking, 23_Protein_translocation, 24_Solute_transport, 25_Nutrient_uptake, 26_External_stimuli_response, 27_Multi-process_regulation, 35_not_assigned, 50_Enzyme_classification]
