# Supplementary material for: Phytochrome-Mediated Light Perception Affects Fruit Development and Ripening Through Epigenetic Mechanisms
Source: Front Plant Sci. 2022 Apr 28;13:870974. doi: 10.3389/fpls.2022.870974 (PMC9096621; doi:10.3389/fpls.2022.870974)
Supplement: Supplementary file 17 [file Table_2.XLSX]

## Sheet: 01_Photosynthesis
Supplementary Table 20. Mapman categories of DMPs with present DEGs between phyA_BK and WT_BK.
BinCode	BinName	id	type	description	PHYA_DMP_DE_BK_All.txt
1.1.1.2.2.2.1	Photosynthesis.photophosphorylation.photosystem II.PS-II complex.oxygen-evolving center (OEC) extrinsic proteins.Viridiplantae-specific components.component OEC23/PsbP	solyc07g044860	Transcript	component PsbP of PS-II oxygen-evolving center (original description: psbXphotosystem II 23 kDa protein) &	4.16741
1.1.4.2.8	Photosynthesis.photophosphorylation.photosystem I.PS-I complex.component PsaH	solyc06g066640	Transcript	component PsaH of PS-I complex (original description: Photosystem I reaction center subunit VI (AHRD V3.3 *** B7FN63_MEDTR)) &	4.03222
1.1.6.1.2	Photosynthesis.photophosphorylation.cyclic electron flow.PGR5/PGRL1 complex.component PGRL1-like	solyc08g007770	Transcript	component PGRL1-like of cyclic electron flow PGR5/PGRL1 complex (original description: Expansin-like protein (AHRD V3.3 *-* Q0WT83_ARATH)) &	-1.00781
1.1.8.1.6.2.1	Photosynthesis.photophosphorylation.chlororespiration.NADH dehydrogenase-like (NDH) complex.assembly and stabilization.Cpn60 chaperonin heterodimer.subunit alpha	solyc06g075010	Transcript	subunit alpha of Cpn60 chaperonin complex (original description: Chaperonin 60 alpha subunit (AHRD V3.3 *** Q9ZTV1_CANLI)) &	-2.14012
1.1.8.1.6.3	Photosynthesis.photophosphorylation.chlororespiration.NADH dehydrogenase-like (NDH) complex.assembly and stabilization.assembly factor (CRR1)	solyc03g026210	Transcript	assembly factor CRR1 involved in NDH complex assembly (original description: Dihydrodipicolinate reductase-like protein (AHRD V3.3 *** A0A0F7GZT6_9ROSI)) &	4.70197
1.2	Photosynthesis.calvin cycle	solyc01g079470	Id	(original description: CP12 (AHRD V3.3 *** O24136_TOBAC)) & Calvin cycle protein CP12-1, chloroplastic OS=Arabidopsis thaliana (sp|o22914|cp121_arath : 85.9)	-2.92202
1.4.1.1	Photosynthesis.CAM/C4 photosynthesis.phosphoenolpyruvate (PEP) carboxylase activity.PEP carboxylase	solyc07g062530	Transcript	PEP carboxylase (original description: phosphoenolpyruvate carboxylase 2) &	3.31249
1.4.2	Photosynthesis.CAM/C4 photosynthesis.NAD-dependent malate dehydrogenase	solyc01g090710	Transcript	NAD-dependent malate dehydrogenase (original description: cytosolic malate dehydrogenase) &	-1.2039

## Sheet: 02_Cellular_respiration
Supplementary Table 20. Mapman categories of DMPs with present DEGs between phyA_BK and WT_BK.
BinCode	BinName	id	type	description	PHYA_DMP_DE_BK_All.txt
2.1.1.1.1	Cellular respiration.glycolysis.cytosolic glycolysis.phosphofructokinase activities.ATP-dependent phosphofructokinase	solyc08g066100	Transcript	ATP-dependent phosphofructokinase (original description: ATP-dependent 6-phosphofructokinase (AHRD V3.3 *** A0A0V0IM90_SOLCH)) &	1.19018
2.1.1.1.1	Cellular respiration.glycolysis.cytosolic glycolysis.phosphofructokinase activities.ATP-dependent phosphofructokinase	solyc05g024230	Id	no hits & (original description: ATP-dependent 6-phosphofructokinase (AHRD V3.3 *-* A0A0V0IM90_SOLCH))	2.26177
2.1.1.4.2	Cellular respiration.glycolysis.cytosolic glycolysis.glyceraldehyde 3-phosphate dehydrogenase activities.NADP-dependent glyceraldehyde 3-phosphate dehydrogenase	solyc07g005390	Transcript	NADP-dependent glyceraldehyde 3-phosphate dehydrogenase (original description: aldehyde dehydrogenase 11A3 (AHRD V3.3 *** AT2G24270.3)) &	-12.3609
2.4.1	Cellular respiration.oxidative phosphorylation.NADH dehydrogenase complex	solyc12g035223	Id	no hits & (original description: Cytochrome b561 and DOMON domain-containing protein At5g35735 (AHRD V3.3 --* B561P_ARATH))	10.9048
2.4.1.2.4	Cellular respiration.oxidative phosphorylation.NADH dehydrogenase complex.module Q (electron output) components.component NQO9/TYKY	solyc10g051350	Transcript	component NQO9/TYKY of NADH dehydrogenase electron output (module Q) (original description: NAD(P)H-quinone oxidoreductase subunit I, chloroplastic (AHRD V3.3 *** NDHI_AETGR)) &	-1.32198
2.4.1.4.1.4	Cellular respiration.oxidative phosphorylation.NADH dehydrogenase complex.non-core components.alpha subcomplex.component NDUFA8	solyc08g007805	Transcript	component NDUFA8 of NADH dehydrogenase alpha subcomplex (original description: NADH dehydrogenase 1 alpha subcomplex subunit 8 (AHRD V3.3 *-* A0A0K9PKB1_ZOSMR)) &	4.97943
2.4.2.1.2	Cellular respiration.oxidative phosphorylation.alternative NAD(P)H dehydrogenase activities.type-II NAD(P)H dehydrogenase activities.NAD(P)H dehydrogenase (NDB)	solyc07g054670	Transcript	NAD(P)H dehydrogenase (NDB) (original description: External alternative NAD(P)H-ubiquinone oxidoreductase B2, mitochondrial (AHRD V3.3 *** NDB2_ARATH)) &	-11.642
2.4.5.1	Cellular respiration.oxidative phosphorylation.cytochrome c oxidase complex.core components	solyc02g065190	Id	Geraniol 8-hydroxylase OS=Catharanthus roseus (sp|q8vwz7|c76b6_catro : 631.0) & Enzyme classification.EC_1 oxidoreductases.EC_1.14 oxidoreductase acting on paired donor with incorporation or reduction of molecular oxygen(50.1.13 : 389.2) (original description: Cytochrome P450 (AHRD V3.3 *** Q8H0I6_PETHY)) &	1.4331
2.4.5.1.4	Cellular respiration.oxidative phosphorylation.cytochrome c oxidase complex.core components.component COX5b	solyc06g067940	Transcript	component COX5b of cytochrome c oxidase complex (original description: Cytochrome c oxidase subunit 5b (AHRD V3.3 *** Q1EMP4_PLAMJ)) &	7.7055
2.4.6.1.7	Cellular respiration.oxidative phosphorylation.ATP synthase complex.membrane MF0 subcomplex.subunit ATP6	solyc06g060080	Transcript	subunit ATP6 of ATP synthase membrane MF0 subcomplex (original description: Mitochondrial ATP synthase 6 kDa subunit (AHRD V3.3 *** A0A0K9PE24_ZOSMR)) &	7.16635

## Sheet: 03_Carbohydrate_metabolism
Supplementary Table 20. Mapman categories of DMPs with present DEGs between phyA_BK and WT_BK.
BinCode	BinName	id	type	description	PHYA_DMP_DE_BK_All.txt
3	Carbohydrate metabolism	solyc02g087770	Id	no hits & (original description: Aldose 1-epimerase (AHRD V3.3 *** K4BBT3_SOLLC))	0.984638
3	Carbohydrate metabolism	solyc02g067690	Id	UDP-glycosyltransferase 90A1 OS=Arabidopsis thaliana (sp|q9zvx4|u90a1_arath : 489.0) & Enzyme classification.EC_2 transferases.EC_2.4 glycosyltransferase(50.2.4 : 175.1) (original description: Glycosyltransferase (AHRD V3.3 *** M1A9P1_SOLTU)) &	-11.95
3	Carbohydrate metabolism	solyc12g014010	Id	UDP-glucose flavonoid 3-O-glucosyltransferase 6 OS=Fragaria ananassa (sp|q2v6k0|ufog6_fraan : 500.0) & Enzyme classification.EC_2 transferases.EC_2.4 glycosyltransferase(50.2.4 : 262.1) (original description: Glycosyltransferase (AHRD V3.3 *** M1B8J3_SOLTU)) &	4.58154
3	Carbohydrate metabolism	solyc12g098600	Id	no description available(sp|k4cws6|u75c1_sollc : 449.0) & Enzyme classification.EC_2 transferases.EC_2.4 glycosyltransferase(50.2.4 : 313.9) (original description: Glycosyltransferase (AHRD V3.3 *** K4DHN3_SOLLC)) &	-2.35046
3	Carbohydrate metabolism	solyc01g005830	Id	Glucan endo-1,3-beta-glucosidase 4 OS=Arabidopsis thaliana (sp|q94cd8|e134_arath : 162.0) & Enzyme classification.EC_3 hydrolases.EC_3.2 glycosylase(50.3.2 : 83.6) (original description: Glucan endo-1,3-beta-glucosidase, putative (AHRD V3.3 *-* B9T1E3_RICCO)) &	3.35166
3	Carbohydrate metabolism	solyc12g014420	Id	Glucan endo-1,3-beta-glucosidase 13 OS=Arabidopsis thaliana (sp|q9fju9|e1313_arath : 382.0) & Enzyme classification.EC_3 hydrolases.EC_3.2 glycosylase(50.3.2 : 330.0) (original description: Glucan endo-1,3-beta-glucosidase, putative (AHRD V3.3 *** B9SU04_RICCO)) &	-2.25257
3.1	Carbohydrate metabolism.sucrose metabolism	solyc02g089440	Id	(original description: glycosyltransferase family protein) & Probable galacturonosyltransferase 9 OS=Arabidopsis thaliana (sp|q9fwa4|gaut9_arath : 814.0)	4.22762
3.1	Carbohydrate metabolism.sucrose metabolism	solyc02g085660	Id	Anthocyanidin 3-O-glucosyltransferase 5 OS=Manihot esculenta (sp|q40287|ufog5_manes : 494.0) & Enzyme classification.EC_2 transferases.EC_2.4 glycosyltransferase(50.2.4 : 347.8) (original description: Glycosyltransferase (AHRD V3.3 *** K4BB77_SOLLC)) &	6.65504
3.1.2	Carbohydrate metabolism.sucrose metabolism.biosynthesis	solyc01g086640	Id	(original description: LOW QUALITY:O-fucosyltransferase family protein (AHRD V3.3 *** AT2G44500.1)) & O-fucosyltransferase 20 OS=Arabidopsis thaliana (sp|o64884|oft20_arath : 663.0)	2.68102
3.1.4.1.1	Carbohydrate metabolism.sucrose metabolism.degradation.invertase activities.acid beta-fructofuranosidase (CWIN)	solyc10g083290	Transcript	acid beta-fructofuranosidase (CWIN) (original description: symbol=Lin6) &	1.78443
3.1.4.1.2	Carbohydrate metabolism.sucrose metabolism.degradation.invertase activities.acid beta-fructofuranosidase (VIN)	solyc03g083910	Transcript	acid beta-fructofuranosidase (VIN) (original description: symbol=TIV1) &	1.09348
3.1.4.1.2	Carbohydrate metabolism.sucrose metabolism.degradation.invertase activities.acid beta-fructofuranosidase (VIN)	solyc08g079080	Transcript	acid beta-fructofuranosidase (VIN) (original description: symbol=lin9) &	-1.87981
3.1.4.2	Carbohydrate metabolism.sucrose metabolism.degradation.sucrose synthase	solyc02g081300	Transcript	sucrose synthase (original description: Sucrose synthase (AHRD V3.3 *** A0A0C5DIW2_CAMSI)) &	-3.445
3.1.4.3	Carbohydrate metabolism.sucrose metabolism.degradation.hexokinase	solyc04g081400	Transcript	hexokinase (original description: Phosphotransferase (AHRD V3.3 *** Q4PS96_SOLLC)) &	1.79005
3.2.3.3.1.2	Carbohydrate metabolism.starch metabolism.degradation.hydrolysis and phosphorolysis.amylase activities.beta amylase	solyc08g007130	Transcript	beta amylase (original description: Beta-amylase (AHRD V3.3 *** K4CIK0_SOLLC)) &	1.71195
3.2.3.3.1.2	Carbohydrate metabolism.starch metabolism.degradation.hydrolysis and phosphorolysis.amylase activities.beta amylase	solyc09g091030	Transcript	beta amylase (original description: Beta-amylase 1) &	-2.75013
3.2.3.3.3	Carbohydrate metabolism.starch metabolism.degradation.hydrolysis and phosphorolysis.plastidial glucanotransferase	solyc04g053120	Transcript	plastidial glucanotransferase (original description: 4-alpha-glucanotransferase (AHRD V3.3 *** K4BSG9_SOLLC)) &	-1.00066
3.2.3.3.4	Carbohydrate metabolism.starch metabolism.degradation.hydrolysis and phosphorolysis.plastidial alpha-glucan phosphorylase	solyc03g065340	Transcript	plastidial alpha-glucan phosphorylase (original description: Alpha-1,4 glucan phosphorylase (AHRD V3.3 *** K4BHG4_SOLLC)) &	6.47554
3.3.2	Carbohydrate metabolism.trehalose metabolism.trehalose-6-phosphate phosphatase	solyc03g083960	Transcript	trehalose-6-phosphate phosphatase (original description: Trehalose 6-phosphate phosphatase (AHRD V3.3 *** K4BIH1_SOLLC)) &	3.36841
3.3.2	Carbohydrate metabolism.trehalose metabolism.trehalose-6-phosphate phosphatase	solyc02g072150	Id	Probable alpha,alpha-trehalose-phosphate synthase [UDP-forming] 7 OS=Arabidopsis thaliana (sp|q9lmi0|tps7_arath : 1330.0) & Enzyme classification.EC_2 transferases.EC_2.4 glycosyltransferase(50.2.4 : 538.3) (original description: Trehalose-6-phosphate synthase, putative (AHRD V3.3 *** B9S8D6_RICCO)) &	4.35936
3.6.1	Carbohydrate metabolism.mannose metabolism.phosphomannose isomerase	solyc02g063220	Transcript	phosphomannose isomerase (original description: Mannose-6-phosphate isomerase (AHRD V3.3 *** K4B6K7_SOLLC)) &	0.834816
3.9.1.3	Carbohydrate metabolism.oxidative pentose phosphate pathway.oxidative phase.6-phosphogluconate dehydrogenase	solyc04g005160	Transcript	6-phosphogluconate dehydrogenase (original description: 6-phosphogluconate dehydrogenase, decarboxylating (AHRD V3.3 *** A0A0K1P904_SOLCH)) &	4.35557
3.12.4	Carbohydrate metabolism.plastidial glycolysis.glyceraldehyde 3-phosphate dehydrogenase	solyc10g005510	Transcript	glyceraldehyde 3-phosphate dehydrogenase (original description: Glyceraldehyde-3-phosphate dehydrogenase (AHRD V3.3 *** K4CX83_SOLLC)) &	-0.906267
3.13.2.1.1	Carbohydrate metabolism.nucleotide sugar biosynthesis.GDP-L-fucose biosynthesis.de novo biosynthesis.GDP-D-mannose 4,6-dehydratase (MUR1)	solyc02g084210	Transcript	GDP-D-mannose 4,6-dehydratase (MUR1) (original description: GDP-mannose 4,6 dehydratase 1 (AHRD V3.3 *** GMD1_ARATH)) &	7.56535
3.13.3.1	Carbohydrate metabolism.nucleotide sugar biosynthesis.UDP-D-glucuronic acid biosynthesis.UDP-D-glucose 6-dehydrogenase	solyc02g088690	Transcript	UDP-D-glucose 6-dehydrogenase (original description: UDP-glucose 6-dehydrogenase family protein (AHRD V3.3 *** AT3G29360.2)) &	2.93551
3.13.3.1	Carbohydrate metabolism.nucleotide sugar biosynthesis.UDP-D-glucuronic acid biosynthesis.UDP-D-glucose 6-dehydrogenase	solyc06g069550	Transcript	UDP-D-glucose 6-dehydrogenase (original description: UDP-glucose 6-dehydrogenase family protein (AHRD V3.3 *** AT3G29360.2)) &	0.827869
3.13.3.2.1	Carbohydrate metabolism.nucleotide sugar biosynthesis.UDP-D-glucuronic acid biosynthesis.myo-inositol oxidation pathway (MIOP).myo-inositol-1-phosphate synthase	solyc04g054740	Transcript	myo-inositol-1-phosphate synthase (original description: myo-inositol-1-phosphate synthase) &	2.5911
3.13.4.1	Carbohydrate metabolism.nucleotide sugar biosynthesis.UDP-D-galacturonic acid biosynthesis.UDP-D-glucuronic acid 4-epimerase	solyc07g006220	Transcript	UDP-D-glucuronic acid 4-epimerase (original description: UDP-glucuronate 4-epimerase 4 (AHRD V3.3 *** GAE4_ARATH)) &	-3.62498
3.13.4.1	Carbohydrate metabolism.nucleotide sugar biosynthesis.UDP-D-galacturonic acid biosynthesis.UDP-D-glucuronic acid 4-epimerase	solyc12g010540	Transcript	UDP-D-glucuronic acid 4-epimerase (original description: UDP-glucuronate 4-epimerase 4 (AHRD V3.3 *** GAE4_ARATH)) &	-1.39335
3.13.8	Carbohydrate metabolism.nucleotide sugar biosynthesis.UDP-D-glucose 4-epimerase	solyc12g055930	Transcript	UDP-D-glucose 4-epimerase (original description: UDP-glucose 4-epimerase (AHRD V3.3 *** Q6XZA0_SOLTU)) &	2.0687
3.13.9.1.4	Carbohydrate metabolism.nucleotide sugar biosynthesis.UDP-N-acetylglucosamine biosynthesis.de novo biosynthesis.UDP-N-acetylglucosamine pyrophosphorylase	solyc02g068530	Transcript	UDP-N-acetylglucosamine pyrophosphorylase (original description: N-acetylglucosamine-1-phosphate uridylyltransferase 1 (AHRD V3.3 *** AT1G31070.2)) &	3.2111

## Sheet: 04_Amino_acid_metabolism
Supplementary Table 20. Mapman categories of DMPs with present DEGs between phyA_BK and WT_BK.
BinCode	BinName	id	type	description	PHYA_DMP_DE_BK_All.txt
4	Amino acid metabolism	solyc08g068620	Id	(original description: Decarboxylase family protein IPR002129 Pyridoxal phosphate-dependent decarboxylase) & Histidine decarboxylase OS=Solanum lycopersicum (sp|p54772|dchs_sollc : 503.0)	4.43822
4	Amino acid metabolism	solyc08g068630	Id	(original description: Decarboxylase family protein IPR002129 Pyridoxal phosphate-dependent decarboxylase) & Histidine decarboxylase OS=Solanum lycopersicum (sp|p54772|dchs_sollc : 585.0)	6.39121
4	Amino acid metabolism	solyc08g068660	Id	(original description: Histidine decarboxylase (AHRD V3.3 *-* W0KR26_TOBAC)) & Histidine decarboxylase OS=Solanum lycopersicum (sp|p54772|dchs_sollc : 115.0)	-5.33186
4	Amino acid metabolism	solyc08g068770	Id	(original description: N-hydroxycinnamoyl-CoA:tyramine N-hydroxycinnamoyl transferase) & Tyramine N-feruloyltransferase 4/11 OS=Nicotiana tabacum (sp|q9smb8|tht11_tobac : 344.0)	-5.9985
4.1	Amino acid metabolism.biosynthesis	solyc02g083360	Id	no hits & (original description: methionine-S-oxide reductase (AHRD V3.3 *** AT2G17705.1))	1.92559
4.1.1	Amino acid metabolism.biosynthesis.glutamate family	solyc08g068690	Id	(original description: Tyramine n-hydroxycinnamoyl transferase (AHRD V3.3 *** Q5D8C0_CAPAN)) & Tyramine N-feruloyltransferase 4/11 OS=Nicotiana tabacum (sp|q9smb8|tht11_tobac : 338.0)	1.19547
4.1.1	Amino acid metabolism.biosynthesis.glutamate family	solyc08g068730	Id	(original description: Tyramine n-hydroxycinnamoyl transferase (AHRD V3.3 *** Q5D8C0_CAPAN)) & Tyramine N-feruloyltransferase 4/11 OS=Nicotiana tabacum (sp|q9smb8|tht11_tobac : 351.0)	-1.13702
4.1.1.1.3.1	Amino acid metabolism.biosynthesis.glutamate family.glutamate-derived amino acids.gamma-aminobutyrate (GABA).glutamate decarboxylase	solyc04g025530	Transcript	glutamate decarboxylase (original description: glutamate decarboxylase (AHRD V3.3 *** AT5G17330.1)) &	1.22864
4.1.4.1.1	Amino acid metabolism.biosynthesis.serine family.non-photorespiratory serine.phosphoglycerate dehydrogenase	solyc03g123830	Transcript	phosphoglycerate dehydrogenase (original description: D-3-phosphoglycerate dehydrogenase (AHRD V3.3 *** K4BN81_SOLLC)) &	-3.81989
4.1.4.2.2	Amino acid metabolism.biosynthesis.serine family.cysteine.O-acetylserine sulfydrylase	solyc09g082060	Transcript	O-acetylserine sulfydrylase (original description: Cysteine synthase (AHRD V3.3 *** CYSK_SOLTU)) &	1.44766
4.1.5.2.3	Amino acid metabolism.biosynthesis.shikimate family.phenylalanine and tyrosine.arogenate dehydrogenase (ADH)	solyc06g050630	Transcript	arogenate dehydrogenase (ADH) (original description: arogenate dehydrogenase (AHRD V3.3 *-* AT5G34930.3)) &	-1.86247
4.1.5.2.4	Amino acid metabolism.biosynthesis.shikimate family.phenylalanine and tyrosine.arogenate dehydratase (ADT)	solyc02g080620	Transcript	arogenate dehydratase (ADT) (original description: Arogenate dehydratase (AHRD V3.3 *** K4B9T3_SOLLC)) &	-1.12213
4.1.5.2.4	Amino acid metabolism.biosynthesis.shikimate family.phenylalanine and tyrosine.arogenate dehydratase (ADT)	solyc06g074530	Transcript	arogenate dehydratase (ADT) (original description: Arogenate dehydratase (AHRD V3.3 *** K4C9H1_SOLLC)) &	-4.11682
4.1.5.3	Amino acid metabolism.biosynthesis.shikimate family.tryptophan	solyc12g096190	Id	(original description: Tryptophan synthase-related (AHRD V3.3 *** A0A0A9M6W8_ARUDO)) & Tryptophan synthase beta chain 2, chloroplastic OS=Arabidopsis thaliana (sp|p25269|trbp2_arath : 120.0)	-5.06974
4.1.5.3.3	Amino acid metabolism.biosynthesis.shikimate family.tryptophan.phosphoribosyanthranilate isomerase	solyc06g051410	Transcript	phosphoribosyanthranilate isomerase (original description: Phosphoribosylanthranilate isomerase (AHRD V3.3 *** F1BPW4_SOLPN)) &	6.34305
4.2	Amino acid metabolism.degradation	solyc08g082370	Id	no hits & (original description: LOW QUALITY:calpain-type cysteine protease family (AHRD V3.3 --* AT1G55350.6))	-2.64227
4.2.2.1	Amino acid metabolism.degradation.gamma-aminobutyrate (GABA).gamma-aminobutyric acid pyruvate transaminase	solyc12g006470	Transcript	GABA pyruvate transaminase (original description: viroid RNA-binding protein) &	1.41258
4.2.7.5.1.1	Amino acid metabolism.degradation.branched-chain amino acid.leucine.methylcrotonoyl-CoA carboxylase heterodimer.subunit alpha	solyc09g065540	Transcript	subunit alpha of methylcrotonoyl-CoA carboxylase complex (original description: biotin-binding protein) &	1.79387
4.2.8	Amino acid metabolism.degradation.aromatic amino acid	solyc08g068600	Id	(original description: Aromatic amino acid decarboxylase 1B (AHRD V3.3 *** Q1KSC5_SOLLC)) & Histidine decarboxylase OS=Solanum lycopersicum (sp|p54772|dchs_sollc : 590.0)	3.16048
4.2.8	Amino acid metabolism.degradation.aromatic amino acid	solyc08g068680	Id	(original description: aromatic amino acid decarboxylase 1A) & Histidine decarboxylase OS=Solanum lycopersicum (sp|p54772|dchs_sollc : 590.0)	-2.85344

## Sheet: 05_Lipid_metabolism
Supplementary Table 20. Mapman categories of DMPs with present DEGs between phyA_BK and WT_BK.
BinCode	BinName	id	type	description	PHYA_DMP_DE_BK_All.txt
5	Lipid metabolism	solyc12g099430	Id	no hits & (original description: Epoxide hydrolase (AHRD V3.3 *** A0A072UTA2_MEDTR))	2.02736
5	Lipid metabolism	solyc08g029000	Id	Probable linoleate 9S-lipoxygenase 5 OS=Solanum tuberosum (sp|q43191|lox15_soltu : 1687.0) & Enzyme classification.EC_1 oxidoreductases.EC_1.13 oxidoreductase acting on single donor with incorporation of molecular oxygen (oxygenase)(50.1.12 : 1452.5) (original description: Lipoxygenase (AHRD V3.3 *** Q43800_TOBAC)) &	-1.36022
5.1	Lipid metabolism.fatty acid biosynthesis	solyc01g009870	Id	(original description: Glycerophosphodiester phosphodiesterase, putative (AHRD V3.3 *** B9RM92_RICCO)) & Glycerophosphodiester phosphodiesterase GDPD3 OS=Arabidopsis thaliana (sp|q680a6|gdpd3_arath : 374.0)	2.70046
5.1	Lipid metabolism.fatty acid biosynthesis	solyc03g045140	Id	(original description: Cyclopropane-fatty-acyl-phospholipid synthase (AHRD V3.3 *** AT3G23530.1)) & Probable (S)-tetrahydroprotoberberine N-methyltransferase 2 OS=Papaver bracteatum (sp|c3sbu4|tnmt2_papbr : 94.7)	-1.05873
5.1.1.2.1	Lipid metabolism.fatty acid biosynthesis.citrate shuttle.ATP-dependent citrate lyase heterodimer.alpha chain	solyc05g005160	Transcript	alpha chain of ATP-dependent citrate lyase complex (original description: ATP-citrate synthase, putative (AHRD V3.3 *** B9SHC9_RICCO)) &	3.5101
5.1.1.2.2	Lipid metabolism.fatty acid biosynthesis.citrate shuttle.ATP-dependent citrate lyase heterodimer.beta chain	solyc12g099260	Transcript	beta chain of ATP-dependent citrate lyase complex (original description: ATP-citrate synthase, putative (AHRD V3.3 *** B9RZR0_RICCO)) &	-3.01369
5.1.4.2.1	Lipid metabolism.fatty acid biosynthesis.plastidial fatty acid synthase (ptFAS) system.ketoacyl-ACP synthase activities.ketoacyl-ACP synthase I	solyc08g082620	Transcript	ketoacyl-ACP synthase I (original description: 3-oxoacyl-[acyl-carrier-protein] synthase (AHRD V3.3 *** O82520_CAPCH)) &	-1.35628
5.1.4.5	Lipid metabolism.fatty acid biosynthesis.plastidial fatty acid synthase (ptFAS) system.enoyl-ACP reductase (MOD1)	solyc10g078740	Transcript	enoyl-ACP reductase (original description: Enoyl reductase (AHRD V3.3 *** P93062_BRANA)) &	-5.47969
5.1.7.3	Lipid metabolism.fatty acid biosynthesis.fatty acid desaturation.omega-3/omega-6 fatty acid desaturase (FAD2/3/6-8)	solyc03g058430	Transcript	omega-3/omega-6 fatty acid desaturase (original description: Fatty acid desaturase (AHRD V3.3 *** M4QSE6_9ERIC)) &	5.37671
5.1.7.3	Lipid metabolism.fatty acid biosynthesis.fatty acid desaturation.omega-3/omega-6 fatty acid desaturase (FAD2/3/6-8)	solyc04g040130	Transcript	omega-3/omega-6 fatty acid desaturase (original description: Fatty acid desaturase (AHRD V3.3 *** I3RV99_9ERIC)) &	-5.82207
5.1.7.3	Lipid metabolism.fatty acid biosynthesis.fatty acid desaturation.omega-3/omega-6 fatty acid desaturase (FAD2/3/6-8)	solyc12g044950	Transcript	omega-3/omega-6 fatty acid desaturase (original description: lipid desaturase) &	1.32833
5.2.1.2.4	Lipid metabolism.glycerolipid biosynthesis.phosphatidate.endoplasmic reticulum phosphatidate biosynthesis.lysophosphatidate acyltransferase (LPAT)	solyc10g079110	Transcript	1-acylglycerol-3-phosphate O-acyltransferase (original description: 1-acyl-sn-glycerol-3-phosphate acyltransferase (AHRD V3.3 *** Q2Z1Y8_PRUMU)) &	-2.09965
5.2.1.4	Lipid metabolism.glycerolipid biosynthesis.phosphatidate.diacylglycerol kinase	solyc06g009270	Transcript	diacylglycerol kinase (original description: Diacylglycerol kinase (AHRD V3.3 *** K4C3V7_SOLLC)) &	5.71197
5.2.1.4	Lipid metabolism.glycerolipid biosynthesis.phosphatidate.diacylglycerol kinase	solyc07g054830	Transcript	diacylglycerol kinase (original description: diacylglycerol kinase) &	1.16591
5.2.2.1	Lipid metabolism.glycerolipid biosynthesis.diacylglycerol.phosphatidate phosphatase (LPP-alpha)	solyc02g086370	Transcript	phosphatidate phosphatase (LPP-alpha) (original description: Lipid phosphate phosphatase-like protein (AHRD V3.3 *** I3SWU2_MEDTR)) &	5.36963
5.2.2.1	Lipid metabolism.glycerolipid biosynthesis.diacylglycerol.phosphatidate phosphatase (LPP-alpha)	solyc05g008815	Transcript	phosphatidate phosphatase (LPP-alpha) (original description: Lipid phosphate phosphatase-like protein (AHRD V3.3 *** A0A072U232_MEDTR)) &	2.32325
5.2.4.5.1	Lipid metabolism.glycerolipid biosynthesis.phosphatidylcholine.choline homeostasis.phosphocholine phosphatase	solyc06g062540	Transcript	phosphocholine phosphatase (original description: putative acid phosphatase) &	-2.67762
5.2.4.5.1	Lipid metabolism.glycerolipid biosynthesis.phosphatidylcholine.choline homeostasis.phosphocholine phosphatase	solyc06g062550	Transcript	phosphocholine phosphatase (original description: LES459817 putative phosphatase 14A) &	-1.62634
5.2.4.5.1	Lipid metabolism.glycerolipid biosynthesis.phosphatidylcholine.choline homeostasis.phosphocholine phosphatase	solyc07g021710	Transcript	phosphocholine phosphatase (original description: Inorganic pyrophosphatase 2 (AHRD V3.3 *** A0A199VVZ6_ANACO)) &	5.65565
5.3.2	Lipid metabolism.galactolipid and sulfolipid biosynthesis.monogalactosyldiacylglycerol synthase (MGD)	solyc07g007620	Transcript	monogalactosyldiacylglycerol synthase (original description: Monogalactosyldiacylglycerol synthase (AHRD V3.3 *** A0A087G8S7_ARAAL)) &	-0.946729
5.4.5	Lipid metabolism.sphingolipid biosynthesis.ceramide synthase	solyc03g113060	Transcript	ceramide synthase (original description: ABC transporter A family protein (AHRD V3.3 *** A0A072UUA7_MEDTR)) &	-3.66146
5.4.8	Lipid metabolism.sphingolipid biosynthesis.sphingoid long-chain base phosphate phosphatase	solyc03g051970	Transcript	sphingoid long-chain base phosphate phosphatase (original description: Dihydrosphingosine 1-phosphate phosphatase (AHRD V3.3 *** W9S3H5_9ROSA)) &	2.5152
5.4.9	Lipid metabolism.sphingolipid biosynthesis.delta-8 sphingolipid desaturase	solyc08g063090	Transcript	delta-8 sphingolipid desaturase (original description: Sphingolipid delta-8 desaturase (AHRD V3.3 *** A4GK73_TOBAC)) &	2.7709
5.4.9	Lipid metabolism.sphingolipid biosynthesis.delta-8 sphingolipid desaturase	solyc10g011810	Transcript	delta-8 sphingolipid desaturase (original description: Fatty acid/sphingolipid desaturase (AHRD V3.3 *-* AT2G46210.1)) &	2.2521
5.4.9	Lipid metabolism.sphingolipid biosynthesis.delta-8 sphingolipid desaturase	solyc10g011820	Transcript	delta-8 sphingolipid desaturase (original description: Fatty acid/sphingolipid desaturase (AHRD V3.3 *** AT2G46210.1)) &	5.38727
5.4.10	Lipid metabolism.sphingolipid biosynthesis.sphingolipid fatty acid 2-hydroxylase	solyc02g022890	Transcript	sphingolipid fatty acid 2-hydroxylase (original description: Fatty acid 2-hydroxylase (AHRD V3.3 *** A0A1D1ZHT2_9ARAE)) &	-1.85812
5.4.13.1	Lipid metabolism.sphingolipid biosynthesis.glycosylinositol phosphorylceramide (GIPC) biosynthesis.inositol phosphorylceramide synthase (IPCS)	solyc09g011740	Transcript	inositol phosphorylceramide synthase (IPCS) (original description: Phosphatidylinositol:ceramide inositolphosphotransferase (AHRD V3.3 *** IPCS_ORYSI)) &	-3.76838
5.4.13.1	Lipid metabolism.sphingolipid biosynthesis.glycosylinositol phosphorylceramide (GIPC) biosynthesis.inositol phosphorylceramide synthase (IPCS)	solyc10g084990	Transcript	inositol phosphorylceramide synthase (IPCS) (original description: Phosphatidylinositol:ceramide inositolphosphotransferase (AHRD V3.3 *** IPCS_ORYSI)) &	-1.66281
5.5	Lipid metabolism.phytosterol biosynthesis	solyc01g079410	Id	no hits & (original description: Calcium-dependent phosphotriesterase superfamily protein (AHRD V3.3 *** A0A061DRE0_THECC))	1.38264
5.5.2.3.2	Lipid metabolism.phytosterol biosynthesis.phytosterol conjugation.phytosterol esterification.acyl-CoA:cholesterol acyltransferase	solyc07g065060	Transcript	acyl-CoA:cholesterol acyltransferase (original description: MBOAT (Membrane bound O-acyl transferase) family protein, putative (AHRD V3.3 *** G7K4B1_MEDTR)) &	-1.26301
5.7.2.1.1	Lipid metabolism.lipid degradation.phospholipase activities.phospholipase A1 activities.phospholipase A1 (PC-PLA1)	solyc08g078090	Transcript	phospholipase A1 (PC-PLA1) (original description: Alpha/beta-Hydrolases superfamily protein (AHRD V3.3 *** A0A061GB30_THECC)) &	-2.34356
5.7.2.1.1	Lipid metabolism.lipid degradation.phospholipase activities.phospholipase A1 activities.phospholipase A1 (PC-PLA1)	solyc09g065890	Transcript	phospholipase A1 (PC-PLA1) (original description: Alpha/beta-Hydrolases superfamily protein (AHRD V3.3 *** A0A061DP20_THECC)) &	-2.27431
5.7.2.2.4	Lipid metabolism.lipid degradation.phospholipase activities.phospholipase A2 activities.phospholipase A2 (pPLA2-III)	solyc09g065240	Transcript	phospholipase A2 (pPLA2-III) (original description: Patatin (AHRD V3.3 *** K4CUF1_SOLLC)) &	3.5504
5.7.2.4.2	Lipid metabolism.lipid degradation.phospholipase activities.phospholipase D activities.phospholipase D (PLD-beta|gamma)	solyc01g091910	Transcript	phospholipase D (PLD-beta|gamma) (original description: phospholipase PLDb2) &	4.01928
5.7.3.5.1	Lipid metabolism.lipid degradation.fatty acid degradation.auxiliary degradation activities.dodecenoyl-CoA isomerase	solyc01g091520	Transcript	dodecenoyl-CoA isomerase (original description: Enoyl-CoA hydratase/isomerase family protein (AHRD V3.3 *** B9HTL0_POPTR)) &	2.72738
5.7.3.6.3	Lipid metabolism.lipid degradation.fatty acid degradation.glyoxylate cycle.isocitrate lyase	solyc07g052480	Transcript	isocitrate lyase (original description: isocitrate lyase LEU18678) &	-8.13406
5.8.2.1	Lipid metabolism.lipid trafficking.endoplasmic reticulum-plastid lipid transfer.phospholipid transverse translocation	solyc02g070210	Id	(original description: Sec14p-like phosphatidylinositol transfer family protein (AHRD V3.3 *** A0A061G966_THECC)) & Patellin-4 OS=Arabidopsis thaliana (sp|q94c59|patl4_arath : 454.0)	2.09621
5.8.2.1.1.1	Lipid metabolism.lipid trafficking.endoplasmic reticulum-plastid lipid transfer.phospholipid transverse translocation.ALA-ALIS flippase complex.active component ALA	solyc05g010120	Transcript	active component ALA of ALA-ALIS flippase complex (original description: Phospholipid-transporting ATPase (AHRD V3.3 *** A0A0V0IZF0_SOLCH)) &	-1.73024
5.8.2.1.1.1	Lipid metabolism.lipid trafficking.endoplasmic reticulum-plastid lipid transfer.phospholipid transverse translocation.ALA-ALIS flippase complex.active component ALA	solyc12g044920	Transcript	active component ALA of ALA-ALIS flippase complex (original description: Phospholipid-transporting ATPase (AHRD V3.3 *** A0A0V0IZF4_SOLCH)) &	3.13481
5.8.2.1.1.2	Lipid metabolism.lipid trafficking.endoplasmic reticulum-plastid lipid transfer.phospholipid transverse translocation.ALA-ALIS flippase complex.regulatory component ALIS	solyc05g054800	Transcript	regulatory component ALIS of ALA-ALIS flippase complex (original description: LEM3 (Ligand-effect modulator 3) family protein (AHRD V3.3 *** D7L0J9_ARALL)) &	6.18934
5.9.1	Lipid metabolism.lipid bodies-associated activities.lipid droplet biogenesis factor (SEIPIN)	solyc04g056380	Transcript	lipid droplet biogenesis factor (SEIPIN) (original description: Seipin (AHRD V3.3 *** A0A0B0N0V2_GOSAR)) &	3.37192
5.9.3	Lipid metabolism.lipid bodies-associated activities.caleosin lipid body surface protein (CLO/PXG)	solyc01g005400	Transcript	caleosin (original description: Caleosin-related family protein (AHRD V3.3 *** AT1G70670.1)) &	-1.19333
5.9.4	Lipid metabolism.lipid bodies-associated activities.steroleosin dehydrogenase (HSD/SLO)	solyc06g072670	Transcript	steroleosin (original description: hydroxysteroid dehydrogenase 1 (AHRD V3.3 *** AT5G50700.1)) &	0.780452

## Sheet: 06_Nucleotide_metabolism
Supplementary Table 20. Mapman categories of DMPs with present DEGs between phyA_BK and WT_BK.
BinCode	BinName	id	type	description	PHYA_DMP_DE_BK_All.txt
6.1	Nucleotide metabolism.purines	solyc05g043390	Id	no hits & (original description: Pseudouridine-5'-phosphate glycosidase (AHRD V3.3 --* M7YM69_TRIUA))	-5.95546
6.1.2.3	Nucleotide metabolism.purines.salvage pathway.adenosine kinase	solyc09g007940	Transcript	adenosine kinase (original description: Adenosine kinase, putative (AHRD V3.3 *** B9T0A9_RICCO)) &	1.71574
6.1.4.4	Nucleotide metabolism.purines.catabolism.nucleoside hydrolase (NSH3)	solyc01g080570	Transcript	nucleoside hydrolase (original description: inosine-uridine preferring nucleoside hydrolase family protein (AHRD V3.3 *** AT5G18860.2)) &	-2.54903
6.2.1	Nucleotide metabolism.pyrimidines.de novo biosynthesis	solyc02g084130	Id	no hits & (original description: uridine kinase-like 5 (AHRD V3.3 --* AT3G27440.3))	6.6933
6.2.1.6	Nucleotide metabolism.pyrimidines.de novo biosynthesis.CTP synthetase	solyc01g056850	Transcript	CTP synthetase (original description: CTP synthase (AHRD V3.3 *** W8SVJ8_TOBAC)) &	-1.44806
6.3.2.1	Nucleotide metabolism.deoxynucleotides.salvage pathway.thymidine kinase (TK1)	solyc11g065760	Transcript	thymidine kinase (TK1) (original description: TK1-like deoxyribonucleoside kinase) &	1.49918
6.3.2.4	Nucleotide metabolism.deoxynucleotides.salvage pathway.nucleoside diphosphate kinase	solyc08g082430	Transcript	nucleoside diphosphate kinase (original description: Nucleoside diphosphate kinase (AHRD V3.3 *** K4CPN9_SOLLC)) &	3.4495
6.3.3.2	Nucleotide metabolism.deoxynucleotides.catabolism.deoxyuridine triphosphatase (DUT)	solyc01g100030	Transcript	deoxyuridine triphosphatase (DUT) (original description: deoxyuridine triphosphatase) &	1.5382

## Sheet: 07_Coenzyme_metabolism
Supplementary Table 20. Mapman categories of DMPs with present DEGs between phyA_BK and WT_BK.
BinCode	BinName	id	type	description	PHYA_DMP_DE_BK_All.txt
7	Coenzyme metabolism	solyc01g008550	Id	(original description: phenylacetaldehyde reductase PAR2) & Cinnamoyl-CoA reductase 1 OS=Arabidopsis thaliana (sp|q9s9n9|ccr1_arath : 300.0)	1.18184
7	Coenzyme metabolism	solyc02g081360	Id	(original description: CoA ligase (AHRD V3.3 *** A0A0K9NMT8_ZOSMR)) & Butyrate--CoA ligase AAE11, peroxisomal OS=Arabidopsis thaliana (sp|q9c8d4|aae11_arath : 660.0)	2.37138
7	Coenzyme metabolism	solyc12g011160	Id	3-hydroxyisobutyryl-CoA hydrolase-like protein 5 OS=Arabidopsis thaliana (sp|q9shj8|hibc8_arath : 518.0) & Enzyme classification.EC_3 hydrolases.EC_3.1 hydrolase acting on ester bond(50.3.1 : 285.9) (original description: 3-hydroxyisobutyryl-CoA hydrolase-like protein (AHRD V3.3 *** A0A072V5U1_MEDTR)) &	-1.34321
7.2.1.3	Coenzyme metabolism.thiamine pyrophosphate biosynthesis.hydroxymethylpyrimidine diphosphate biosynthesis.thiamine monophosphate phosphatase (Th2)	solyc09g064510	Transcript	thiamine monophosphate phosphatase (Th2) (original description: heme oxygenase-like, multi-helical (AHRD V3.3 *** AT5G32470.1)) &	5.13822
7.3.1	Coenzyme metabolism.S-adenosyl methionine (SAM) cycle.S-adenosyl methionine synthetase	solyc09g008280	Transcript	S-adenosyl methionine synthetase (original description: S-adenosyl-L-methionine synthetase Z24743) &	0.970834
7.3.1	Coenzyme metabolism.S-adenosyl methionine (SAM) cycle.S-adenosyl methionine synthetase	solyc10g083970	Transcript	S-adenosyl methionine synthetase (original description: S-adenosylmethionine synthase (AHRD V3.3 *** A0A0V0IPC3_SOLCH)) &	2.72991
7.12.1.2	Coenzyme metabolism.tetrapyrrol biosynthesis.5-aminolevulinic acid formation.glutamyl-tRNA reductase	solyc01g106390	Transcript	glutamyl-tRNA reductase (original description: Glutamyl-tRNA reductase (AHRD V3.3 *** K4B2K7_SOLLC)) &	5.62507
7.12.4.2.1	Coenzyme metabolism.tetrapyrrol biosynthesis.protoporphyrin IX formation.coproporphyrinogen III oxidase activities.oxygen-dependent coproporphyrinogen III oxidase (HemF)	solyc10g005120	Transcript	oxygen-dependent coproporphyrinogen III oxidase (HemF) (original description: 2-oxoglutarate (2OG) and Fe(II)-dependent oxygenase superfamily protein (AHRD V3.3 *** AT4G16330.2)) &	-6.75084

## Sheet: 08_Polyamine_metabolism
Supplementary Table 20. Mapman categories of DMPs with present DEGs between phyA_BK and WT_BK.
BinCode	BinName	id	type	description	PHYA_DMP_DE_BK_All.txt
8.1.1.1	Polyamine metabolism.putrescine biosynthesis.plastidial/nuclear pathway.arginine decarboxylase	solyc10g054440	Transcript	arginine decarboxylase (original description: arginine decarboxylase 1) &	3.32483
8.2.1	Polyamine metabolism.spermidine biosynthesis.S-adenosyl methionine decarboxylase	solyc02g089610	Transcript	S-adenosyl methionine decarboxylase (original description: S-adenosylmethionine decarboxylase 2) &	0.589649
8.5.2.1	Polyamine metabolism.polyamine degradation.FAD-dependent polyamine oxidase activities.cytosolic polyamine oxidase (PAO1)	solyc01g087590	Transcript	cytosolic polyamine oxidase (PAO1) (original description: Polyamine oxidase (AHRD V3.3 *** Q4H439_TOBAC)) &	2.58067

## Sheet: 09_Secondary_metabolism
Supplementary Table 20. Mapman categories of DMPs with present DEGs between phyA_BK and WT_BK.
BinCode	BinName	id	type	description	PHYA_DMP_DE_BK_All.txt
9	Secondary metabolism	solyc02g070800	Id	no hits & (original description: Thiamine monophosphate synthase (AHRD V3.3 *** I3SV46_MEDTR))	-6.10366
9.1.1.1	Secondary metabolism.terpenoids.mevalonate pathway.acetyl-CoA C-acyltransferase	solyc07g045350	Transcript	acetyl-CoA C-acyltransferase (original description: Acetoacetyl-CoA thiolase (AHRD V3.3 *** F5CLC4_CATRO)) &	-2.41049
9.1.1.2	Secondary metabolism.terpenoids.mevalonate pathway.3-hydroxy-3-methylglutaryl-CoA synthase	solyc08g080170	Transcript	3-hydroxy-3-methylglutaryl-CoA synthase (original description: Hydroxymethylglutaryl-CoA synthase, putative (AHRD V3.3 *** B9RC08_RICCO)) &	-1.61863
9.1.1.5	Secondary metabolism.terpenoids.mevalonate pathway.phosphomevalonate kinase	solyc06g066310	Transcript	phosphomevalonate kinase (original description: Phosphomevalonate kinase (AHRD V3.3 *** A0A0X9ZV04_9ROSI)) &	-34.9585
9.1.1.6	Secondary metabolism.terpenoids.mevalonate pathway.mevalonate diphosphate decarboxylase	solyc11g007020	Transcript	mevalonate diphosphate decarboxylase (original description: mevalonate disphosphate decarboxylase) &	-1.02983
9.1.4.2	Secondary metabolism.terpenoids.terpene biosynthesis.mono-/sesquiterpene-/diterpene synthase	solyc01g101170	Transcript	mono-/sesquiterpene-/diterpene synthase (original description: Viridiflorene synthase (AHRD V3.3 *** TPS31_SOLLC)) &	-1.9615
9.1.6.1.5	Secondary metabolism.terpenoids.carotenoid biosynthesis.carotenes.lycopene epsilon cyclase (LCY-e)	solyc12g008980	Transcript	lycopene epsilon cyclase (LCY-e) (original description: Delta) &	1.8028
9.2.1.1.1	Secondary metabolism.phenolics.p-coumaroyl-CoA biosynthesis.phenylalanine ammonia lyase activity.phenylalanine ammonia lyase (PAL)	solyc05g056170	Transcript	phenylalanine ammonia lyase (PAL) (original description: phenylalanine ammonia-lyase 2) &	-2.51174
9.2.1.1.1	Secondary metabolism.phenolics.p-coumaroyl-CoA biosynthesis.phenylalanine ammonia lyase activity.phenylalanine ammonia lyase (PAL)	solyc09g007890	Transcript	phenylalanine ammonia lyase (PAL) (original description: Phenylalanine ammonia-lyase (AHRD V3.3 *** PAL5_SOLLC)) &	2.34023
9.2.1.1.1	Secondary metabolism.phenolics.p-coumaroyl-CoA biosynthesis.phenylalanine ammonia lyase activity.phenylalanine ammonia lyase (PAL)	solyc09g007900	Transcript	phenylalanine ammonia lyase (PAL) (original description: Phenylalanine ammonia-lyase (AHRD V3.3 *** PAL5_SOLLC)) &	-1.50094
9.2.1.1.1	Secondary metabolism.phenolics.p-coumaroyl-CoA biosynthesis.phenylalanine ammonia lyase activity.phenylalanine ammonia lyase (PAL)	solyc09g007920	Transcript	phenylalanine ammonia lyase (PAL) (original description: Phenylalanine ammonia-lyase (AHRD V3.3 *** PAL5_SOLLC)) &	2.97324
9.2.2.1.1.2	Secondary metabolism.phenolics.flavonoid biosynthesis.chalcones.chalcone synthase activity.proteolytic chalcone synthase regulator (KFB-CHS)	solyc05g005150	Transcript	proteolytic chalcone synthase regulator (KFB-CHS) (original description: Kelch repeat-containing F-box family protein, putative (AHRD V3.3 *** A0A061E7C3_THECC)) &	-1.14087
9.2.2.4.3	Secondary metabolism.phenolics.flavonoid biosynthesis.dihydroflavonols.flavanone 3-hydroxylase	solyc02g083860	Transcript	flavanone 3-hydroxylase (original description: flavanone 3-dioxygenase) &	2.39952
9.2.2.7.1	Secondary metabolism.phenolics.flavonoid biosynthesis.aurones.aureusidin synthase	solyc08g074682	Transcript	aureusidin synthase (original description: polyphenol oxidase precursor) &	-2.14469
9.2.2.7.1	Secondary metabolism.phenolics.flavonoid biosynthesis.aurones.aureusidin synthase	solyc08g074683	Transcript	aureusidin synthase (original description: polyphenol oxidase precursor) &	-1.02582
9.2.2.8.2	Secondary metabolism.phenolics.flavonoid biosynthesis.isoflavonoids.2-hydroxyisoflavanone dehydratase	solyc09g075670	Transcript	2-hydroxyisoflavanone dehydratase (original description: Alpha/beta-Hydrolases superfamily protein (AHRD V3.3 *** A0A061EKQ6_THECC)) &	5.4183
9.4.1.2	Secondary metabolism.betaines.glycinebetaine biosynthesis.betaine-aldehyde dehydrogenase	solyc06g071290	Transcript	betaine-aldehyde dehydrogenase (original description: putative betaine aldehyde dehyrogenase) &	2.59216

## Sheet: 10_Redox_homeostasis
Supplementary Table 20. Mapman categories of DMPs with present DEGs between phyA_BK and WT_BK.
BinCode	BinName	id	type	description	PHYA_DMP_DE_BK_All.txt
10	Redox homeostasis	solyc01g073640	Id	(original description: alcohol dehydrogenase-3,Pfam:PF13561) & Short-chain dehydrogenase reductase 3b OS=Arabidopsis thaliana (sp|q94k41|sdr3b_arath : 291.0)	-1.93229
10.1.1	Redox homeostasis.reactive oxygen generation.NADPH-oxidase (Rboh)	solyc03g117980	Transcript	NADPH-oxidase (Rboh) (original description: whitefly-induced gp91-phox) &	-2.73923
10.1.1	Redox homeostasis.reactive oxygen generation.NADPH-oxidase (Rboh)	solyc06g068680	Transcript	NADPH-oxidase (Rboh) (original description: Respiratory burst oxidase homolog (AHRD V3.3 *** Q84KK7_NICBE)) &	-1.07269
10.1.1	Redox homeostasis.reactive oxygen generation.NADPH-oxidase (Rboh)	solyc01g008560	Id	NAD(H) kinase 1 OS=Arabidopsis thaliana (sp|q56yn3|nadk1_arath : 701.0) & Enzyme classification.EC_2 transferases.EC_2.7 transferase transferring phosphorus-containing group(50.2.7 : 376.1) (original description: NAD kinase 1 (AHRD V3.3 *** AT3G21070.2)) &	0.991561
10.2.1	Redox homeostasis.enzymatic reactive oxygen species scavengers.catalase	solyc04g082460	Transcript	catalase (original description: Catalase 3) &	2.04446
10.3.1	Redox homeostasis.low-molecular-weight scavengers.ascorbate biosynthesis	solyc02g065170	Id	L-ascorbate oxidase homolog OS=Brassica napus (sp|q00624|asol_brana : 595.0) & Enzyme classification.EC_1 oxidoreductases.EC_1.10 oxidoreductase acting on diphenol or related substance as donor(50.1.10 : 124.4) (original description: L-ascorbate oxidase like (AHRD V3.3 *** A0A0B2RUS1_GLYSO)) &	4.05347
10.3.1	Redox homeostasis.low-molecular-weight scavengers.ascorbate biosynthesis	solyc02g090360	Id	L-ascorbate oxidase homolog OS=Nicotiana tabacum (sp|p29162|asol_tobac : 592.0) & Enzyme classification.EC_1 oxidoreductases.EC_1.10 oxidoreductase acting on diphenol or related substance as donor(50.1.10 : 125.4) (original description: L-ascorbate oxidase like (AHRD V3.3 *** A0A0B2RUS1_GLYSO)) &	5.23673
10.3.1.2	Redox homeostasis.low-molecular-weight scavengers.ascorbate biosynthesis.phosphomannomutase (PMM)	solyc05g046340	Transcript	phosphomannomutase (PMM) (original description: Phosphomannomutase (AHRD V3.3 *** K4C0W7_SOLLC)) &	-2.81154
10.3.3.2.1	Redox homeostasis.low-molecular-weight scavengers.glutathione metabolism.glutathione degradation.gamma-glutamyl cyclotransferase	solyc11g012910	Transcript	gamma-glutamyl cyclotransferase (original description: Gamma-glutamylcyclotransferase (AHRD V3.3 *** K4D695_SOLLC)) &	1.54132
10.3.3.2.1	Redox homeostasis.low-molecular-weight scavengers.glutathione metabolism.glutathione degradation.gamma-glutamyl cyclotransferase	solyc12g096320	Transcript	gamma-glutamyl cyclotransferase (original description: Gamma-glutamylcyclotransferase (AHRD V3.3 *** K4DHA5_SOLLC)) &	-1.53758
10.4	Redox homeostasis.hydrogen peroxide removal	solyc01g006290	Id	(original description: Peroxidase (AHRD V3.3 *** K4ASJ5_SOLLC)) & Lignin-forming anionic peroxidase OS=Nicotiana tabacum (sp|p11965|perx_tobac : 482.0)	-1.96191
10.4	Redox homeostasis.hydrogen peroxide removal	solyc02g079510	Id	(original description: Peroxidase (AHRD V1 **** Q50LG4_TOBAC)%3B contains Interpro domain(s) IPR019793 Peroxidases heam-ligand binding site IPR019794 Peroxidase%2C active site IPR002016 Haem peroxidase%2C plant/fungal/bacterial) & Suberization-associated anionic peroxidase 2 OS=Solanum lycopersicum (sp|p15004|per2_sollc : 611.0)	-1.88567
10.4.1.3	Redox homeostasis.hydrogen peroxide removal.ascorbate-glutathione cycle.dehydroascorbate reductase (DHAR)	solyc04g064470	Transcript	dehydroascorbate reductase (DHAR) (original description: Squamosa promoter-binding-like protein (AHRD V3.3 *-* A0A072V7X4_MEDTR)) &	-1.9219
10.4.1.3	Redox homeostasis.hydrogen peroxide removal.ascorbate-glutathione cycle.dehydroascorbate reductase (DHAR)	solyc09g056180	Transcript	dehydroascorbate reductase (DHAR) (original description: Dehydroascorbate reductase (AHRD V3.3 *-* Q1G0W3_SOLLC),Pfam:PF13410) &	-5.9774
10.4.2	Redox homeostasis.hydrogen peroxide removal.glutathione peroxidase	solyc08g080940	Transcript	glutathione peroxidase (original description: glutathione peroxidase like encoding 1) &	3.18388
10.4.3.2	Redox homeostasis.hydrogen peroxide removal.peroxiredoxin activities.type-2 peroxiredoxin (PrxII)	solyc10g083650	Transcript	type-2 peroxiredoxin (PrxII) (original description: Peroxiredoxin, putative (AHRD V3.3 *** B9SRG0_RICCO)) &	-4.40179
10.6.1	Redox homeostasis.cytosol/mitochondrion/nucleus redox homeostasis.H-type thioredoxin	solyc04g080850	Transcript	H-type thioredoxin (original description: Thioredoxin (AHRD V3.3 *** Q201Z4_9SOLN)) &	3.7199
10.6.3	Redox homeostasis.cytosol/mitochondrion/nucleus redox homeostasis.nucleoredoxin	solyc05g005460	Transcript	nucleoredoxin (original description: Cysteine/Histidine-rich C1 domain family protein (AHRD V3.3 --* AT2G44370.1)) &	-1.13437

[truncated: 19 more sheets: 11_Phytohormone_action, 12_Chromatin_organisation, 13_Cell_cycle_organisation, 14_DNA_damage_response, 15_RNA_biosynthesis, 16_RNA_processing, 17_Protein_biosynthesis, 18_Protein_modification, 19_Protein_homeostasis, 20_Cytoskeleton_organisation, 21_Cell_wall_organisation, 22_Vesicle_trafficking, 23_Protein_translocation, 24_Solute_transport, 25_Nutrient_uptake, 26_External_stimuli_response, 27_Multi-process_regulation, 35_not_assigned, 50_Enzyme_classification]
