# Supplementary material for: Phytochrome-Mediated Light Perception Affects Fruit Development and Ripening Through Epigenetic Mechanisms
Source: Front Plant Sci. 2022 Apr 28;13:870974. doi: 10.3389/fpls.2022.870974 (PMC9096621; doi:10.3389/fpls.2022.870974)
Supplement: Supplementary file 18 [file Table_3.XLSX]

## Sheet: 01_Photosynthesis
Supplementary Table 21. Mapman categories of DMPs with present DEGs between phyB1B2_BK and WT_BK.
BinCode	BinName	id	type	description	PHYB1B2_DMP_DE_BK_All.txt
1.1.1.1.1	Photosynthesis.photophosphorylation.photosystem II.LHC-II complex.component LHCb1/2/3	solyc12g006140	Transcript	component LHCb1/2/3 of LHC-II complex (original description: Cab-5 gene encoding chlorophyll a/b-binding protein) &	4.66317
1.1.1.1.1	Photosynthesis.photophosphorylation.photosystem II.LHC-II complex.component LHCb1/2/3	solyc12g011450	Transcript	component LHCb1/2/3 of LHC-II complex (original description: Chlorophyll a-b binding protein, chloroplastic (AHRD V3.3 *** M1AG46_SOLTU)) &	4.64179
1.1.1.1.4	Photosynthesis.photophosphorylation.photosystem II.LHC-II complex.component LHCb6	solyc01g105050	Transcript	component LHCb6 of LHC-II complex (original description: Chlorophyll a-b binding protein, chloroplastic (AHRD V3.3 *** M1AY18_SOLTU)) &	2.73707
1.1.1.2.1.1	Photosynthesis.photophosphorylation.photosystem II.PS-II complex.reaction center complex.component D1/PsbA	solyc01g048590	Id	(original description: LOW QUALITY:Photosystem II protein D1 (AHRD V3.3 *-* PSBA_CHLVU)) & Photosystem II protein D1 OS=Petunia hybrida (sp|p04999|psba_pethy : 122.0)	-4.40078
1.1.1.2.2.1	Photosynthesis.photophosphorylation.photosystem II.PS-II complex.oxygen-evolving center (OEC) extrinsic proteins.component OEC33/PsbO	solyc02g065400	Transcript	component PsbO/OEC33 of PS-II oxygen-evolving center (original description: 33kDa precursor protein of oxygen-evolving complex) &	1.76237
1.1.1.2.2.2.1	Photosynthesis.photophosphorylation.photosystem II.PS-II complex.oxygen-evolving center (OEC) extrinsic proteins.Viridiplantae-specific components.component OEC23/PsbP	solyc07g044860	Transcript	component PsbP of PS-II oxygen-evolving center (original description: psbXphotosystem II 23 kDa protein) &	-1.06981
1.1.1.3.22	Photosynthesis.photophosphorylation.photosystem II.assembly and maintenance.assembly factor (HHL1)	solyc05g014310	Transcript	HHL1 protein involved in PS-II assembly (original description: multidrug resistance protein (AHRD V3.3 *** AT1G67700.5)) &	1.01131
1.1.1.5.1.4	Photosynthesis.photophosphorylation.photosystem II.photoprotection.non-photochemical quenching (NPQ).NPQ-regulatory protein (FLAP1)	solyc01g097860	Transcript	FLAP1 non-photochemical quenching regulator protein (original description: Myelin-associated oligodendrocyte basic protein isoform 1 (AHRD V3.3 *** A0A061F284_THECC)) &	4.40256
1.1.1.5.1.6	Photosynthesis.photophosphorylation.photosystem II.photoprotection.non-photochemical quenching (NPQ).NPQ-regulatory protein (SOQ1)	solyc01g100650	Transcript	SOQ1 non-photochemical quenching regulator protein (original description: haloacid dehalogenase-like hydrolase family protein (AHRD V3.3 *** AT1G56500.1)) &	-1.5176
1.1.1.6.1.2	Photosynthesis.photophosphorylation.photosystem II.LHC-related protein groups.two-helix LHC-related protein group.protein (SEP2)	solyc04g053130	Transcript	SEP2 LHC-related protein (original description: Stress enhanced protein 2 (AHRD V3.3 *** K7XKQ9_SOLTU)) &	3.43851
1.1.1.6.1.3	Photosynthesis.photophosphorylation.photosystem II.LHC-related protein groups.two-helix LHC-related protein group.protein (SEP3)	solyc08g077880	Transcript	SEP3 LHC-related protein (original description: High molecular mass early light-inducible HV58, chloroplastic (AHRD V3.3 *** A0A0B0NUU8_GOSAR)) &	0.975117
1.1.2.9.1.3	Photosynthesis.photophosphorylation.cytochrome b6/f complex.assembly.CCB cytochrome b6 maturation system (system IV).assembly factor (CCB3)	solyc02g021000	Transcript	assembly factor CCB3 of CCB cytochrome b6 maturation system (system IV) (original description: YGGT family protein-like (AHRD V3.3 *-* Q5JJV4_ORYSJ)) &	0.979052
1.1.2.9.2.3	Photosynthesis.photophosphorylation.cytochrome b6/f complex.assembly.CCS cytochrome f/c6 maturation system (system II).assembly factor (Ccs5/CcdA)	solyc07g063570	Transcript	assembly factor CcdA of CCS cytochrome f/c6 maturation system (system II) (original description: Cytochrome c-type biogenesis ccda-like chloroplastic protein (AHRD V3.3 *** CCDA_ARATH)) &	2.76225
1.1.2.9.2.3	Photosynthesis.photophosphorylation.cytochrome b6/f complex.assembly.CCS cytochrome f/c6 maturation system (system II).assembly factor (Ccs5/CcdA)	solyc08g060970	Transcript	assembly factor CcdA of CCS cytochrome f/c6 maturation system (system II) (original description: polygalacturonase AF118567) &	4.00215
1.1.4.1.3	Photosynthesis.photophosphorylation.photosystem I.LHC-I complex.component LHCa3	solyc10g007690	Transcript	component LHCa3 of LHC-I complex (original description: Chlorophyll a-b binding protein, chloroplastic (AHRD V3.3 *** K4CXU8_SOLLC)) &	-3.26793
1.1.4.2.8	Photosynthesis.photophosphorylation.photosystem I.PS-I complex.component PsaH	solyc06g066640	Transcript	component PsaH of PS-I complex (original description: Photosystem I reaction center subunit VI (AHRD V3.3 *** B7FN63_MEDTR)) &	3.30168
1.1.4.2.14	Photosynthesis.photophosphorylation.photosystem I.PS-I complex.component PsaN	solyc08g013670	Transcript	component PsaN of PS-I complex (original description: photosystem I reaction center subunit) &	3.29798
1.1.5.1	Photosynthesis.photophosphorylation.linear electron flow.ferredoxin electron carrier	solyc10g075160	Transcript	ferredoxin electron carrier (original description: Ferredoxin (AHRD V3.3 *** A0A0K0PY61_NICBE)) &	4.29197
1.1.5.2.1	Photosynthesis.photophosphorylation.linear electron flow.ferredoxin-NADP reductase (FNR) activity.ferredoxin-NADP oxidoreductase	solyc02g062130	Transcript	ferredoxin-NADP oxidoreductase (original description: Ferredoxin--NADP reductase (AHRD V3.3 *** K4B6A3_SOLLC)) &	3.68555
1.1.5.2.1	Photosynthesis.photophosphorylation.linear electron flow.ferredoxin-NADP reductase (FNR) activity.ferredoxin-NADP oxidoreductase	solyc02g083810	Transcript	ferredoxin-NADP oxidoreductase (original description: Ferredoxin--NADP reductase (AHRD V3.3 *** A0A0V0I3W8_SOLCH)) &	4.58413
1.1.6.1.2	Photosynthesis.photophosphorylation.cyclic electron flow.PGR5/PGRL1 complex.component PGRL1-like	solyc08g007770	Transcript	component PGRL1-like of cyclic electron flow PGR5/PGRL1 complex (original description: Expansin-like protein (AHRD V3.3 *-* Q0WT83_ARATH)) &	2.0813
1.1.8.1.3.1	Photosynthesis.photophosphorylation.chlororespiration.NADH dehydrogenase-like (NDH) complex.subcomplex B.component PnsB1/NDF1	solyc03g116870	Transcript	component PnsB1/NDF1 of NDH subcomplex B (original description: NAD(P)H dehydrogenase subunit 48 (AHRD V3.3 *** A0A0F7GZU3_9ROSI)) &	1.61955
1.1.8.1.4.5	Photosynthesis.photophosphorylation.chlororespiration.NADH dehydrogenase-like (NDH) complex.lumen subcomplex L.component PnsL5	solyc01g009990	Transcript	component PnsL5 of NDH lumen subcomplex L (original description: Peptidyl-prolyl cis-trans isomerase (AHRD V3.3 *** K4ATJ4_SOLLC)) &	-2.78732
1.1.8.1.6.2.1	Photosynthesis.photophosphorylation.chlororespiration.NADH dehydrogenase-like (NDH) complex.assembly and stabilization.Cpn60 chaperonin heterodimer.subunit alpha	solyc06g075010	Transcript	subunit alpha of Cpn60 chaperonin complex (original description: Chaperonin 60 alpha subunit (AHRD V3.3 *** Q9ZTV1_CANLI)) &	-0.993043
1.1.9.1.3	Photosynthesis.photophosphorylation.ATP synthase complex.membrane CF0 subcomplex.subunit b_	solyc06g066000	Transcript	subunit b_ of membrane CF0 subcomplex of ATP synthase complex (original description: ATP synthase subunit b (AHRD V3.3 *** A0A0K9PIX0_ZOSMR)) &	-25.9801
1.1.9.3.2	Photosynthesis.photophosphorylation.ATP synthase complex.assembly.assembly factor (BFA1)	solyc02g088350	Transcript	ATP synthase complex assembly factor (BFA1) (original description: Domain of Uncharacterized protein function isoform 1 (AHRD V3.3 *** A0A061EEX8_THECC)) &	4.17699
1.2.1.1.1	Photosynthesis.calvin cycle.ribulose-1,5-bisphosphat carboxylase/oxygenase (RuBisCo) activity.RuBisCo heterodimer.large subunit	solyc01g060085	Id	(original description: Ribulose bisphosphate carboxylase large chain (AHRD V3.3 *-* RBL_LAVLA)) & Ribulose bisphosphate carboxylase large chain OS=Nicotiana tabacum (sp|p00876|rbl_tobac : 256.0)	-1.92951
1.2.1.1.2	Photosynthesis.calvin cycle.ribulose-1,5-bisphosphat carboxylase/oxygenase (RuBisCo) activity.RuBisCo heterodimer.small subunit	solyc02g063150	Transcript	small subunit of ribulose-1,5-bisphosphat carboxylase/oxygenase heterodimer (original description: RuBP carboxylase small subunit) &	4.27673
1.2.1.2.2	Photosynthesis.calvin cycle.ribulose-1,5-bisphosphat carboxylase/oxygenase (RuBisCo) activity.RuBisCo assembly.auxiliary co-chaperone (CPN20)	solyc07g042250	Transcript	CPN20 auxiliary co-chaperone involved in RuBisCo assembly (original description: chaperonin 21 precursor) &	2.64044
1.2.1.3.2	Photosynthesis.calvin cycle.ribulose-1,5-bisphosphat carboxylase/oxygenase (RuBisCo) activity.RuBisCo regulation.ATP-dependent activase (RCA)	solyc10g086580	Transcript	ATP-dependent activase involved in RuBisCo regulation (original description: Ribulose bisphosphate carboxylase/oxygenase activase (AHRD V3.3 *** V9IMY5_NICAT)) &	-6.84133
1.2.9	Photosynthesis.calvin cycle.phosphopentose isomerase	solyc01g097460	Transcript	phosphopentose isomerase (original description: Ribose 5-phosphate isomerase-related family protein (AHRD V3.3 *** U5GAQ0_POPTR)) &	-5.97701
1.3.2	Photosynthesis.photorespiration.glycolate oxidase	solyc10g007600	Transcript	glycolate oxidase (original description: glycolate oxidase) &	1.69323
1.3.3.1	Photosynthesis.photorespiration.aminotransferase activities.glutamate-glyoxylate transaminase	solyc05g013380	Transcript	glutamate-glyoxylate transaminase (original description: Alanine aminotransferase 2 (AHRD V3.3 *** A0A151TGW4_CAJCA)) &	-0.968557
1.4.1.1	Photosynthesis.CAM/C4 photosynthesis.phosphoenolpyruvate (PEP) carboxylase activity.PEP carboxylase	solyc07g062530	Transcript	PEP carboxylase (original description: phosphoenolpyruvate carboxylase 2) &	10.4282
1.12.6.5.1	Photosynthesis.tetrapyrrol biosynthesis.chlorophyll metabolism.protochlorophyllide oxidoreductase (POR) activities.light-dependent POR	solyc12g013710	Transcript	light-dependent protochlorophyllide oxidoreductase (original description: light dependent NADH:protochlorophyllide oxidoreductase 1) &	5.33075
1.12.6.5.1	Photosynthesis.tetrapyrrol biosynthesis.chlorophyll metabolism.protochlorophyllide oxidoreductase (POR) activities.light-dependent POR	solyc07g054210	Transcript	light-dependent protochlorophyllide oxidoreductase (original description: light dependent NADH:protochlorophyllide oxidoreductase 2) &	6.87367
1.12.6.6.2	Photosynthesis.tetrapyrrol biosynthesis.chlorophyll metabolism.chlorophyll(ide) interconversions.chlorophyll synthase (ChlG)	solyc09g014760	Transcript	chlorophyll synthase (ChlG) (original description: Chlorophyll synthase (AHRD V3.3 *** C3W4Q2_TOBAC)) &	35.0304
1.12.6.6.3	Photosynthesis.tetrapyrrol biosynthesis.chlorophyll metabolism.chlorophyll(ide) interconversions.geranylgeranyl reductase (ChlP)	solyc03g115980	Transcript	geranylgeranyl reductase (ChlP) (original description: Geranylgeranyl reductase (AHRD V3.3 *** A0A097P6G1_SOLHA)) &	1.6721

## Sheet: 02_Cellular_respiration
Supplementary Table 21. Mapman categories of DMPs with present DEGs between phyB1B2_BK and WT_BK.
BinCode	BinName	id	type	description	PHYB1B2_DMP_DE_BK_All.txt
2.1.1.1.1	Cellular respiration.glycolysis.cytosolic glycolysis.phosphofructokinase activities.ATP-dependent phosphofructokinase	solyc08g066100	Transcript	ATP-dependent phosphofructokinase (original description: ATP-dependent 6-phosphofructokinase (AHRD V3.3 *** A0A0V0IM90_SOLCH)) &	4.49743
2.1.1.1.2	Cellular respiration.glycolysis.cytosolic glycolysis.phosphofructokinase activities.pyrophosphate-dependent phosphofructokinase	solyc12g095760	Transcript	pyrophosphate-dependent phosphofructokinase (original description: Pyrophosphate--fructose 6-phosphate 1-phosphotransferase subunit alpha (AHRD V3.3 *** K4DH49_SOLLC)) &	4.84793
2.1.1.4.2	Cellular respiration.glycolysis.cytosolic glycolysis.glyceraldehyde 3-phosphate dehydrogenase activities.NADP-dependent glyceraldehyde 3-phosphate dehydrogenase	solyc07g005390	Transcript	NADP-dependent glyceraldehyde 3-phosphate dehydrogenase (original description: aldehyde dehydrogenase 11A3 (AHRD V3.3 *** AT2G24270.3)) &	6.55786
2.1.1.8	Cellular respiration.glycolysis.cytosolic glycolysis.pyruvate kinase	solyc01g049650	Transcript	pyruvate kinase (original description: Pyruvate kinase (AHRD V3.3 *** K4AVE6_SOLLC)) &	-2.0211
2.1.2.1	Cellular respiration.glycolysis.methylglyoxal degradation.lactoyl-glutathione lyase (GLX1)	solyc12g007310	Transcript	lactoyl-glutathione lyase (GLX1) (original description: Lactoylglutathione lyase (AHRD V3.3 *** A0A059CVI9_EUCGR)) &	2.75933
2.2.1.4.1	Cellular respiration.pyruvate oxidation.mitochondrial pyruvate dehydrogenase complex.regulation.pyruvate dehydrogenase kinase	solyc01g057210	Transcript	pyruvate dehydrogenase kinase (original description: pyruvate dehydrogenase kinase (AHRD V3.3 *** AT3G06483.1)) &	4.64678
2.4	Cellular respiration.oxidative phosphorylation	solyc01g094210	Id	Enzyme classification.EC_1 oxidoreductases.EC_1.1 oxidoreductase acting on CH-OH group of donor(50.1.1 : 422.5) & (+)-neomenthol dehydrogenase OS=Arabidopsis thaliana (sp|q9m2e2|sdr1_arath : 324.0) (original description: NAD(P)-binding Rossmann-fold superfamily protein (AHRD V3.3 *** AT3G61220.1)) &	1.83237
2.4	Cellular respiration.oxidative phosphorylation	solyc01g094250	Id	(+)-neomenthol dehydrogenase OS=Capsicum annuum (sp|b2x050|mnr1_capan : 449.0) & Enzyme classification.EC_1 oxidoreductases.EC_1.1 oxidoreductase acting on CH-OH group of donor(50.1.1 : 384.3) (original description: NAD(P)-binding Rossmann-fold superfamily protein (AHRD V3.3 *** AT3G61220.1)) &	8.84049
2.4.1	Cellular respiration.oxidative phosphorylation.NADH dehydrogenase complex	solyc02g072160	Id	no hits & (original description: NAD(P)-binding Rossmann-fold superfamily protein (AHRD V3.3 *** AT4G18810.1))	5.42524
2.4.2.1.2	Cellular respiration.oxidative phosphorylation.alternative NAD(P)H dehydrogenase activities.type-II NAD(P)H dehydrogenase activities.NAD(P)H dehydrogenase (NDB)	solyc07g054670	Transcript	NAD(P)H dehydrogenase (NDB) (original description: External alternative NAD(P)H-ubiquinone oxidoreductase B2, mitochondrial (AHRD V3.3 *** NDB2_ARATH)) &	-14.1868
2.4.2.1.3	Cellular respiration.oxidative phosphorylation.alternative NAD(P)H dehydrogenase activities.type-II NAD(P)H dehydrogenase activities.NAD(P)H dehydrogenase (NDC)	solyc03g043750	Transcript	NAD(P)H dehydrogenase (NDC) (original description: NAD(P)H dehydrogenase C1 (AHRD V3.3 *** AT5G08740.1)) &	-4.0189
2.4.2.2	Cellular respiration.oxidative phosphorylation.alternative NAD(P)H dehydrogenase activities.alternative oxidase (AOx)	solyc08g075550	Transcript	alternative oxidase (AOx) (original description: alternative oxidase 1au) &	1.56278
2.4.5.1.6	Cellular respiration.oxidative phosphorylation.cytochrome c oxidase complex.core components.component COX6a	solyc03g043850	Transcript	component COX6a of cytochrome c oxidase complex (original description: cytochrome c oxidase-like protein (AHRD V3.3 *** AT4G37830.1)) &	10.9481
2.4.6.2.2	Cellular respiration.oxidative phosphorylation.ATP synthase complex.peripheral MF1 subcomplex.subunit beta	solyc02g091130	Transcript	subunit beta of ATP synthase peripheral MF1 subcomplex (original description: ATP synthase subunit beta (AHRD V3.3 *** A0A0V0IJL8_SOLCH)) &	5.27147

## Sheet: 03_Carbohydrate_metabolism
Supplementary Table 21. Mapman categories of DMPs with present DEGs between phyB1B2_BK and WT_BK.
BinCode	BinName	id	type	description	PHYB1B2_DMP_DE_BK_All.txt
3	Carbohydrate metabolism	solyc01g010310	Id	(original description: Glucan endo-1,3-beta-glucosidase-like protein (AHRD V3.3 *-* A0A0B2R8X2_GLYSO)) & PLASMODESMATA CALLOSE-BINDING PROTEIN 2 OS=Arabidopsis thaliana (sp|q9sd84|pdcb2_arath : 126.0)	1.09503
3	Carbohydrate metabolism	solyc02g087770	Id	no hits & (original description: Aldose 1-epimerase (AHRD V3.3 *** K4BBT3_SOLLC))	2.48049
3	Carbohydrate metabolism	solyc02g081690	Id	UDP-glycosyltransferase 43 OS=Pueraria montana var. lobata (sp|a0a172j2g3|ugt43_pueml : 454.0) & Enzyme classification.EC_2 transferases.EC_2.4 glycosyltransferase(50.2.4 : 275.9) (original description: Glycosyltransferase (AHRD V3.3 *** V4UHR4_9ROSI)) &	3.80147
3	Carbohydrate metabolism	solyc12g096870	Id	Cinnamate beta-D-glucosyltransferase OS=Fragaria ananassa (sp|q66pf4|cgt_fraan : 559.0) & Enzyme classification.EC_2 transferases.EC_2.4 glycosyltransferase(50.2.4 : 322.4) (original description: Glycosyltransferase (AHRD V3.3 *** Q0PI14_VITLA)) &	9.42681
3	Carbohydrate metabolism	solyc01g074030	Id	Furcatin hydrolase OS=Viburnum furcatum (sp|q75w17|furh_vibfr : 572.0) & Enzyme classification.EC_3 hydrolases.EC_3.2 glycosylase(50.3.2 : 417.8) (original description: Beta-glucosidase 01 (AHRD V3.3 *** B5M9E4_SOLLC)) &	1.90513
3.1	Carbohydrate metabolism.sucrose metabolism	solyc02g089440	Id	(original description: glycosyltransferase family protein) & Probable galacturonosyltransferase 9 OS=Arabidopsis thaliana (sp|q9fwa4|gaut9_arath : 814.0)	3.12538
3.1	Carbohydrate metabolism.sucrose metabolism	solyc01g095300	Id	no hits & (original description: glycosyl transferase family 1 protein (AHRD V3.3 *** AT4G01210.1))	-0.902832
3.1	Carbohydrate metabolism.sucrose metabolism	solyc01g095620	Id	Hydroquinone glucosyltransferase OS=Rauvolfia serpentina (sp|q9ar73|hqgt_rause : 653.0) & Enzyme classification.EC_2 transferases.EC_2.4 glycosyltransferase(50.2.4 : 539.4) (original description: Glycosyltransferase (AHRD V3.3 *** D7S016_SOLLC)) &	4.55759
3.1	Carbohydrate metabolism.sucrose metabolism	solyc01g107560	Id	Cinnamate beta-D-glucosyltransferase OS=Fragaria ananassa (sp|q66pf4|cgt_fraan : 604.0) & Enzyme classification.EC_2 transferases.EC_2.4 glycosyltransferase(50.2.4 : 331.1) (original description: Glycosyltransferase (AHRD V3.3 *** K4B2X2_SOLLC)) &	2.48512
3.1.4.1.1	Carbohydrate metabolism.sucrose metabolism.degradation.invertase activities.acid beta-fructofuranosidase (CWIN)	solyc10g083290	Transcript	acid beta-fructofuranosidase (CWIN) (original description: symbol=Lin6) &	3.97681
3.1.4.1.2	Carbohydrate metabolism.sucrose metabolism.degradation.invertase activities.acid beta-fructofuranosidase (VIN)	solyc03g083910	Transcript	acid beta-fructofuranosidase (VIN) (original description: symbol=TIV1) &	-4.38317
3.1.4.1.2	Carbohydrate metabolism.sucrose metabolism.degradation.invertase activities.acid beta-fructofuranosidase (VIN)	solyc08g079080	Transcript	acid beta-fructofuranosidase (VIN) (original description: symbol=lin9) &	1.62995
3.1.4.2	Carbohydrate metabolism.sucrose metabolism.degradation.sucrose synthase	solyc12g009300	Transcript	sucrose synthase (original description: sucrose synthase (SuSy)) &	0.884477
3.1.4.3	Carbohydrate metabolism.sucrose metabolism.degradation.hexokinase	solyc04g081400	Transcript	hexokinase (original description: Phosphotransferase (AHRD V3.3 *** Q4PS96_SOLLC)) &	3.7418
3.2.2.3	Carbohydrate metabolism.starch metabolism.biosynthesis.ADP-glucose pyrophosphorylase	solyc07g056140	Transcript	ADP-glucose pyrophosphorylase (original description: ADP-glucose pyrophosphorylase small subunit) &	1.28628
3.2.2.4	Carbohydrate metabolism.starch metabolism.biosynthesis.starch synthase activities	solyc01g100940	Id	no hits & (original description: LOW QUALITY:starch synthase 2 (AHRD V3.3 --* AT3G01180.1))	2.8327
3.2.2.5	Carbohydrate metabolism.starch metabolism.biosynthesis.starch branching enzyme	solyc04g082400	Transcript	starch branching enzyme (original description: Starch branching enzyme (AHRD V3.3 *** A0A0F7R6Z9_AMAHP)) &	3.45951
3.2.2.6	Carbohydrate metabolism.starch metabolism.biosynthesis.starch debranching enzyme	solyc07g014590	Transcript	starch debranching enzyme (original description: Isoamylase (AHRD V3.3 *** Q1AJM7_IPOBA)) &	2.90846
3.2.3.3.4	Carbohydrate metabolism.starch metabolism.degradation.hydrolysis and phosphorolysis.plastidial alpha-glucan phosphorylase	solyc03g065340	Transcript	plastidial alpha-glucan phosphorylase (original description: Alpha-1,4 glucan phosphorylase (AHRD V3.3 *** K4BHG4_SOLLC)) &	3.22757
3.2.3.3.4	Carbohydrate metabolism.starch metabolism.degradation.hydrolysis and phosphorolysis.plastidial alpha-glucan phosphorylase	solyc05g012510	Transcript	plastidial alpha-glucan phosphorylase (original description: Alpha-1,4 glucan phosphorylase (AHRD V3.3 *** K4BXX3_SOLLC)) &	3.91884
3.4.1	Carbohydrate metabolism.oligosaccharide metabolism.galactinol synthase	solyc01g079170	Transcript	galactinol synthase (original description: Hexosyltransferase (AHRD V3.3 *** K4AXG3_SOLLC)) &	-1.50377
3.10.1	Carbohydrate metabolism.gluconeogenesis.phosphoenolpyruvate carboxykinase	solyc04g076880	Transcript	phosphoenolpyruvate carboxykinase (original description: phosphoenolpyruvate carboxykinase) &	7.17594
3.11.1.2	Carbohydrate metabolism.fermentation.alcoholic fermentation.alcohol dehydrogenase	solyc06g059740	Transcript	alcohol dehydrogenase (original description: Alcohol dehydrogenase (AHRD V3.3 *** ADH_MALDO)) &	3.93948
3.12.4	Carbohydrate metabolism.plastidial glycolysis.glyceraldehyde 3-phosphate dehydrogenase	solyc10g005510	Transcript	glyceraldehyde 3-phosphate dehydrogenase (original description: Glyceraldehyde-3-phosphate dehydrogenase (AHRD V3.3 *** K4CX83_SOLLC)) &	-2.65122
3.13.1.1	Carbohydrate metabolism.nucleotide sugar biosynthesis.GDP-D-mannose biosynthesis.GDP-D-mannose pyrophosphorylase (VTC1)	solyc09g011220	Transcript	GDP-D-mannose pyrophosphorylase (VTC1) (original description: Mannose-1-phosphate guanyltransferase, putative (AHRD V3.3 *** B9SE08_RICCO)) &	1.83574
3.13.1.2	Carbohydrate metabolism.nucleotide sugar biosynthesis.GDP-D-mannose biosynthesis.GDP-D-mannose pyrophosphorylase activator (KONJAC)	solyc03g113790	Transcript	GDP-D-mannose pyrophosphorylase activator (KONJAC) (original description: Mannose-1-phosphate guanyltransferase, putative (AHRD V3.3 *** B9R8Y9_RICCO)) &	0.803355
3.13.2.1.1	Carbohydrate metabolism.nucleotide sugar biosynthesis.GDP-L-fucose biosynthesis.de novo biosynthesis.GDP-D-mannose 4,6-dehydratase (MUR1)	solyc02g084210	Transcript	GDP-D-mannose 4,6-dehydratase (MUR1) (original description: GDP-mannose 4,6 dehydratase 1 (AHRD V3.3 *** GMD1_ARATH)) &	8.91528
3.13.3.2.1	Carbohydrate metabolism.nucleotide sugar biosynthesis.UDP-D-glucuronic acid biosynthesis.myo-inositol oxidation pathway (MIOP).myo-inositol-1-phosphate synthase	solyc05g051850	Transcript	myo-inositol-1-phosphate synthase (original description: putative myo-inositol-1-phosphatase) &	4.1002
3.13.4.1	Carbohydrate metabolism.nucleotide sugar biosynthesis.UDP-D-galacturonic acid biosynthesis.UDP-D-glucuronic acid 4-epimerase	solyc07g006220	Transcript	UDP-D-glucuronic acid 4-epimerase (original description: UDP-glucuronate 4-epimerase 4 (AHRD V3.3 *** GAE4_ARATH)) &	-1.95236
3.13.5.1	Carbohydrate metabolism.nucleotide sugar biosynthesis.UDP-D-xylose biosynthesis.UDP-D-glucuronic acid decarboxylase	solyc05g054590	Transcript	UDP-D-glucuronic acid decarboxylase (original description: UDP-glucuronate decarboxylase 1 (AHRD V3.3 *** Q6IVK5_TOBAC)) &	2.28248
3.13.6.1	Carbohydrate metabolism.nucleotide sugar biosynthesis.UDP-L-rhamnose biosynthesis.UDP-L-rhamnose synthase	solyc08g080140	Transcript	UDP-L-rhamnose synthase (original description: 3,5-epimerase/4-reductase (AHRD V3.3 *** I3SMF8_MEDTR)) &	4.86191
3.13.7.1	Carbohydrate metabolism.nucleotide sugar biosynthesis.UDP-L-arabinose biosynthesis.UDP-D-xylose 4-epimerase	solyc07g043550	Transcript	UDP-D-xylose 4-epimerase (original description: UDP-glucose 4-epimerase, putative (AHRD V3.3 *** B9SV82_RICCO)) &	-1.05677
3.13.7.2.1	Carbohydrate metabolism.nucleotide sugar biosynthesis.UDP-L-arabinose biosynthesis.salvage biosynthesis.L-arabinose kinase	solyc07g016170	Transcript	L-arabinose kinase (original description: L-arabinokinase (AHRD V3.3 *** ARAK_ARATH)) &	4.90411

## Sheet: 04_Amino_acid_metabolism
Supplementary Table 21. Mapman categories of DMPs with present DEGs between phyB1B2_BK and WT_BK.
BinCode	BinName	id	type	description	PHYB1B2_DMP_DE_BK_All.txt
4	Amino acid metabolism	solyc08g068770	Id	(original description: N-hydroxycinnamoyl-CoA:tyramine N-hydroxycinnamoyl transferase) & Tyramine N-feruloyltransferase 4/11 OS=Nicotiana tabacum (sp|q9smb8|tht11_tobac : 344.0)	-1.96022
4	Amino acid metabolism	solyc08g068780	Id	(original description: N-hydroxycinnamoyl-CoA:tyramine N-hydroxycinnamoyl transferase THT7-8) & Tyramine N-feruloyltransferase 4/11 OS=Nicotiana tabacum (sp|q9smb8|tht11_tobac : 339.0)	2.35571
4.1.1	Amino acid metabolism.biosynthesis.glutamate family	solyc08g068700	Id	(original description: Tyramine n-hydroxycinnamoyl transferase (AHRD V3.3 *** Q5D8C0_CAPAN)) & Tyramine N-feruloyltransferase 4/11 OS=Nicotiana tabacum (sp|q9smb8|tht11_tobac : 334.0)	0.989943
4.1.1	Amino acid metabolism.biosynthesis.glutamate family	solyc08g068730	Id	(original description: Tyramine n-hydroxycinnamoyl transferase (AHRD V3.3 *** Q5D8C0_CAPAN)) & Tyramine N-feruloyltransferase 4/11 OS=Nicotiana tabacum (sp|q9smb8|tht11_tobac : 351.0)	1.57977
4.1.1.1.1.2	Amino acid metabolism.biosynthesis.glutamate family.glutamate-derived amino acids.ornithine.N-acetylglutamate kinase	solyc11g005620	Transcript	N-acetylglutamate kinase (original description: acetylglutamate kinase) &	-1.29989
4.1.1.1.1.6	Amino acid metabolism.biosynthesis.glutamate family.glutamate-derived amino acids.ornithine.N2-acetylornithine deacetylase	solyc08g076970	Transcript	N2-acetylornithine deacetylase (original description: Acetylornithine deacetylase (AHRD V3.3 *** ARGE_ARATH)) &	1.45812
4.1.1.1.3.1	Amino acid metabolism.biosynthesis.glutamate family.glutamate-derived amino acids.gamma-aminobutyrate (GABA).glutamate decarboxylase	solyc11g011920	Transcript	glutamate decarboxylase (original description: Glutamate decarboxylase (AHRD V3.3 *** B1Q3F1_SOLLC)) &	1.06248
4.1.2.1.2	Amino acid metabolism.biosynthesis.aspartate family.asparagine.L-asparaginase	solyc04g078460	Transcript	L-asparaginase (original description: L-asparaginase (AHRD V3.3 *** Q84L89_SOYBN)) &	6.06658
4.1.2.2.6.3.2	Amino acid metabolism.biosynthesis.aspartate family.aspartate-derived amino acids.methionine.S-methylmethionine cycle.methionine S-methyltransferase	solyc01g102940	Transcript	methionine S-methyltransferase (original description: methionine S-methyltransferase (AHRD V3.3 *** AT5G49810.1)) &	3.62099
4.1.2.2.7.1	Amino acid metabolism.biosynthesis.aspartate family.aspartate-derived amino acids.threonine.threonine synthase	solyc06g062845	Transcript	threonine synthase (original description: Threonine synthase, putative (AHRD V3.3 *** B9RK44_RICCO)) &	4.8231
4.1.2.2.8.2	Amino acid metabolism.biosynthesis.aspartate family.aspartate-derived amino acids.isoleucine.methionine gamma-lyase	solyc08g083110	Id	(original description: Cystathionine gamma-synthase, putative (AHRD V3.3 *-* B9RYU1_RICCO)) & Methionine gamma-lyase OS=Arabidopsis thaliana (sp|q9sgu9|mgl_arath : 196.0)	-1.87699
4.1.3.2.5.1	Amino acid metabolism.biosynthesis.pyruvate family.pyruvate-derived amino acids.leucine.2-isopropylmalate synthase	solyc08g014130	Transcript	2-isopropylmalate synthase (original description: Isopropylmalate synthase (AHRD V3.3 *** K4CJ46_SOLLC)) &	2.47555
4.1.3.2.5.2.1	Amino acid metabolism.biosynthesis.pyruvate family.pyruvate-derived amino acids.leucine.isopropylmalate isomerase heterodimer.large subunit	solyc09g090900	Transcript	large subunit of isopropylmalate isomerase heterodimer (original description: Aconitate hydratase (AHRD V3.3 *** A0A059LL79_9CHLO)) &	-1.71172
4.1.4.2.2	Amino acid metabolism.biosynthesis.serine family.cysteine.O-acetylserine sulfydrylase	solyc09g082060	Transcript	O-acetylserine sulfydrylase (original description: Cysteine synthase (AHRD V3.3 *** CYSK_SOLTU)) &	1.09499
4.1.5.2.3	Amino acid metabolism.biosynthesis.shikimate family.phenylalanine and tyrosine.arogenate dehydrogenase (ADH)	solyc07g007590	Transcript	arogenate dehydrogenase (ADH) (original description: Arogenate dehydrogenase 1 (AHRD V3.3 *** F1BPV5_SOLPN)) &	6.90419
4.1.5.2.3	Amino acid metabolism.biosynthesis.shikimate family.phenylalanine and tyrosine.arogenate dehydrogenase (ADH)	solyc09g011870	Transcript	arogenate dehydrogenase (ADH) (original description: Arogenate dehydrogenase 2 (AHRD V3.3 *** F1BPV6_SOLPN)) &	-4.32339
4.1.5.2.4	Amino acid metabolism.biosynthesis.shikimate family.phenylalanine and tyrosine.arogenate dehydratase (ADT)	solyc02g080620	Transcript	arogenate dehydratase (ADT) (original description: Arogenate dehydratase (AHRD V3.3 *** K4B9T3_SOLLC)) &	-1.83697
4.1.5.2.4	Amino acid metabolism.biosynthesis.shikimate family.phenylalanine and tyrosine.arogenate dehydratase (ADT)	solyc06g074530	Transcript	arogenate dehydratase (ADT) (original description: Arogenate dehydratase (AHRD V3.3 *** K4C9H1_SOLLC)) &	1.29166
4.1.5.3	Amino acid metabolism.biosynthesis.shikimate family.tryptophan	solyc12g096190	Id	(original description: Tryptophan synthase-related (AHRD V3.3 *** A0A0A9M6W8_ARUDO)) & Tryptophan synthase beta chain 2, chloroplastic OS=Arabidopsis thaliana (sp|p25269|trbp2_arath : 120.0)	-1.95506
4.1.5.3.2	Amino acid metabolism.biosynthesis.shikimate family.tryptophan.anthranilate phosphoribosyltransferase	solyc06g071550	Transcript	anthranilate phosphoribosyltransferase (original description: Anthranilate phosphoribosyltransferase (AHRD V3.3 *** F1BPW3_SOLPN)) &	-6.0429
4.2	Amino acid metabolism.degradation	solyc08g082370	Id	no hits & (original description: LOW QUALITY:calpain-type cysteine protease family (AHRD V3.3 --* AT1G55350.6))	-1.78803
4.2.1.1	Amino acid metabolism.degradation.arginine.arginase	solyc01g091170	Transcript	arginase (original description: arginase 2 ARG2) &	1.37197
4.2.1.3.1	Amino acid metabolism.degradation.arginine.urease accessory protein activities.urease accessory protein (ureD)	solyc02g031980	Transcript	urease accessory protein (ureD) (original description: urease accessory protein D) &	2.11462
4.2.2.3.1	Amino acid metabolism.degradation.gamma-aminobutyrate (GABA).gamma-hydroxybutyrate formation.bifunctional gamma-hydroxybutyrate dehydrogenase and glyoxylate reductase	solyc09g018790	Transcript	bifunctional gamma-hydroxybutyrate dehydrogenase and glyoxylate reductase (original description: Succinic semialdehyde reductase isofom1) &	10.7535
4.2.5.1	Amino acid metabolism.degradation.threonine.threonine aldolase	solyc04g009960	Transcript	threonine aldolase (original description: L-allo-threonine aldolase-related protein (AHRD V3.3 *** Q2XPX1_SOLTU)) &	1.60142
4.2.7.5.1.1	Amino acid metabolism.degradation.branched-chain amino acid.leucine.methylcrotonoyl-CoA carboxylase heterodimer.subunit alpha	solyc09g065540	Transcript	subunit alpha of methylcrotonoyl-CoA carboxylase complex (original description: biotin-binding protein) &	1.52041
4.2.7.5.1.2	Amino acid metabolism.degradation.branched-chain amino acid.leucine.methylcrotonoyl-CoA carboxylase heterodimer.subunit beta	solyc01g108030	Transcript	subunit beta of methylcrotonoyl-CoA carboxylase complex (original description: 3-methylcrotonyl-CoA carboxylase (AHRD V3.3 *** AT4G34030.1)) &	2.99183
4.2.8	Amino acid metabolism.degradation.aromatic amino acid	solyc08g068600	Id	(original description: Aromatic amino acid decarboxylase 1B (AHRD V3.3 *** Q1KSC5_SOLLC)) & Histidine decarboxylase OS=Solanum lycopersicum (sp|p54772|dchs_sollc : 590.0)	2.31549
4.2.8.1	Amino acid metabolism.degradation.aromatic amino acid.aromatic-amino-acid aminotransferase	solyc03g120450	Transcript	aromatic-amino-acid aminotransferase (original description: Aspartate aminotransferase (AHRD V3.3 *** W9S4V9_9ROSA)) &	2.8069

## Sheet: 05_Lipid_metabolism
Supplementary Table 21. Mapman categories of DMPs with present DEGs between phyB1B2_BK and WT_BK.
BinCode	BinName	id	type	description	PHYB1B2_DMP_DE_BK_All.txt
5	Lipid metabolism	solyc01g066453	Id	no hits & (original description: Epoxide hydrolase (AHRD V3.3 *-* S8E221_9LAMI))	3.87412
5	Lipid metabolism	solyc12g099430	Id	no hits & (original description: Epoxide hydrolase (AHRD V3.3 *** A0A072UTA2_MEDTR))	6.55757
5	Lipid metabolism	solyc08g029000	Id	Probable linoleate 9S-lipoxygenase 5 OS=Solanum tuberosum (sp|q43191|lox15_soltu : 1687.0) & Enzyme classification.EC_1 oxidoreductases.EC_1.13 oxidoreductase acting on single donor with incorporation of molecular oxygen (oxygenase)(50.1.12 : 1452.5) (original description: Lipoxygenase (AHRD V3.3 *** Q43800_TOBAC)) &	-2.52576
5.1	Lipid metabolism.fatty acid biosynthesis	solyc03g045140	Id	(original description: Cyclopropane-fatty-acyl-phospholipid synthase (AHRD V3.3 *** AT3G23530.1)) & Probable (S)-tetrahydroprotoberberine N-methyltransferase 2 OS=Papaver bracteatum (sp|c3sbu4|tnmt2_papbr : 94.7)	2.75989
5.1	Lipid metabolism.fatty acid biosynthesis	solyc01g104210	Id	no hits & (original description: GNS1/SUR4 membrane protein family (AHRD V3.3 *** AT3G06470.1))	-2.13786
5.1.1.2.1	Lipid metabolism.fatty acid biosynthesis.citrate shuttle.ATP-dependent citrate lyase heterodimer.alpha chain	solyc05g005160	Transcript	alpha chain of ATP-dependent citrate lyase complex (original description: ATP-citrate synthase, putative (AHRD V3.3 *** B9SHC9_RICCO)) &	1.33765
5.1.1.2.2	Lipid metabolism.fatty acid biosynthesis.citrate shuttle.ATP-dependent citrate lyase heterodimer.beta chain	solyc12g099260	Transcript	beta chain of ATP-dependent citrate lyase complex (original description: ATP-citrate synthase, putative (AHRD V3.3 *** B9RZR0_RICCO)) &	4.68115
5.1.1.4	Lipid metabolism.fatty acid biosynthesis.citrate shuttle.cytosolic NADP-dependent malic enzyme	solyc03g120990	Transcript	cytosolic NADP-dependent malic enzyme (original description: Malic enzyme (AHRD V3.3 *** M0ZRW2_SOLTU)) &	4.16009
5.1.2.2.3	Lipid metabolism.fatty acid biosynthesis.acetyl-CoA generation.plastidial pyruvate dehydrogenase complex.dihydrolipoamide dehydrogenase component E3	solyc05g053100	Transcript	dihydrolipoamide dehydrogenase component E3 of plastidial pyruvate dehydrogenase complex (original description: Dihydrolipoyl dehydrogenase (AHRD V3.3 *** W9QVW5_9ROSA)) &	-1.15025
5.1.4.2.1	Lipid metabolism.fatty acid biosynthesis.plastidial fatty acid synthase (ptFAS) system.ketoacyl-ACP synthase activities.ketoacyl-ACP synthase I	solyc02g070790	Transcript	ketoacyl-ACP synthase I (original description: 3-oxoacyl-[acyl-carrier-protein] synthase (AHRD V3.3 *** A0A0V0IG10_SOLCH)) &	2.37525
5.1.4.5	Lipid metabolism.fatty acid biosynthesis.plastidial fatty acid synthase (ptFAS) system.enoyl-ACP reductase (MOD1)	solyc10g078740	Transcript	enoyl-ACP reductase (original description: Enoyl reductase (AHRD V3.3 *** P93062_BRANA)) &	-4.90585
5.1.6.1.1	Lipid metabolism.fatty acid biosynthesis.endoplasmic reticulum-localized fatty acid elongase (FAE) system.fatty acid elongation complex.3-ketoacyl-CoA synthase (KCS)	solyc02g085870	Transcript	3-ketoacyl-CoA synthase (KCS) (original description: beta-ketoacyl-coenzyme A synthase) &	6.88398
5.1.6.1.1	Lipid metabolism.fatty acid biosynthesis.endoplasmic reticulum-localized fatty acid elongase (FAE) system.fatty acid elongation complex.3-ketoacyl-CoA synthase (KCS)	solyc04g080450	Transcript	3-ketoacyl-CoA synthase (KCS) (original description: 3-ketoacyl-CoA synthase (AHRD V3.3 *** M0ZWA0_SOLTU)) &	-3.52938
5.1.6.1.1	Lipid metabolism.fatty acid biosynthesis.endoplasmic reticulum-localized fatty acid elongase (FAE) system.fatty acid elongation complex.3-ketoacyl-CoA synthase (KCS)	solyc08g067410	Transcript	3-ketoacyl-CoA synthase (KCS) (original description: 3-ketoacyl-CoA synthase (AHRD V3.3 *** A0A023PMK5_TOBAC)) &	4.28043
5.1.6.2.1	Lipid metabolism.fatty acid biosynthesis.endoplasmic reticulum-localized fatty acid elongase (FAE) system.very long chain fatty acid elongation.catalytic protein (CER2)	solyc12g087980	Transcript	catalytic protein (CER2) (original description: HXXXD-type acyl-transferase family protein, putative (AHRD V3.3 *** A0A061FEX2_THECC)) &	1.22737
5.1.7.1	Lipid metabolism.fatty acid biosynthesis.fatty acid desaturation.stearoyl-ACP desaturase	solyc06g053480	Transcript	stearoyl-ACP desaturase (original description: Acyl-[acyl-carrier-protein] desaturase (AHRD V3.3 *** A0A0V0I9I2_SOLCH)) &	1.39731
5.1.7.3	Lipid metabolism.fatty acid biosynthesis.fatty acid desaturation.omega-3/omega-6 fatty acid desaturase (FAD2/3/6-8)	solyc04g040130	Transcript	omega-3/omega-6 fatty acid desaturase (original description: Fatty acid desaturase (AHRD V3.3 *** I3RV99_9ERIC)) &	2.60278
5.1.7.3	Lipid metabolism.fatty acid biosynthesis.fatty acid desaturation.omega-3/omega-6 fatty acid desaturase (FAD2/3/6-8)	solyc12g044950	Transcript	omega-3/omega-6 fatty acid desaturase (original description: lipid desaturase) &	5.35571
5.1.7.3	Lipid metabolism.fatty acid biosynthesis.fatty acid desaturation.omega-3/omega-6 fatty acid desaturase (FAD2/3/6-8)	solyc12g100250	Transcript	omega-3/omega-6 fatty acid desaturase (original description: Fatty acid desaturase (AHRD V3.3 *** E5D7U7_9GENT)) &	2.69545
5.2.1.2.1	Lipid metabolism.glycerolipid biosynthesis.phosphatidate.endoplasmic reticulum phosphatidate biosynthesis.NAD-dependent glycerol-3-phosphate dehydrogenase	solyc04g016330	Transcript	NAD-dependent glycerol-3-phosphate dehydrogenase (original description: Glycerol-3-phosphate dehydrogenase [NAD(+)] (AHRD V3.3 *** K4BQD3_SOLLC)) &	2.78672
5.2.1.2.4	Lipid metabolism.glycerolipid biosynthesis.phosphatidate.endoplasmic reticulum phosphatidate biosynthesis.lysophosphatidate acyltransferase (LPAT)	solyc01g109370	Transcript	1-acylglycerol-3-phosphate O-acyltransferase (original description: 1-acyl-sn-glycerol-3-phosphate acyltransferase (AHRD V3.3 *** B2LWM5_RICCO)) &	1.5428
5.2.1.3.1	Lipid metabolism.glycerolipid biosynthesis.phosphatidate.mitochondrial lysophosphatidate biosynthesis.glycerol-3-phosphate acyltransferase (GPAT1-3)	solyc07g056320	Transcript	glycerol-3-phosphate acyltransferase (GPAT) (original description: Glycerol-3-phosphate acyltransferase (AHRD V3.3 *** G7K3C7_MEDTR)) &	-2.76613
5.2.2.1	Lipid metabolism.glycerolipid biosynthesis.diacylglycerol.phosphatidate phosphatase (LPP-alpha)	solyc02g086370	Transcript	phosphatidate phosphatase (LPP-alpha) (original description: Lipid phosphate phosphatase-like protein (AHRD V3.3 *** I3SWU2_MEDTR)) &	6.13668
5.2.4.1	Lipid metabolism.glycerolipid biosynthesis.phosphatidylcholine.phospho-base N-methyltransferase	solyc06g068950	Transcript	phospho-base N-methyltransferase (original description: Phosphoethanolamine N-methyltransferase (AHRD V3.3 *** PEAMT_SPIOL)) &	-9.36154
5.2.5.1.1	Lipid metabolism.glycerolipid biosynthesis.phosphatidylserine.base-exchange pathway.base-exchange-type phosphatidylserine synthase	solyc05g008580	Transcript	base-exchange-type phosphatidylserine synthase (original description: Phosphatidylserine synthase 2 (AHRD V3.3 *** W8TFN0_TOBAC)) &	3.36101
5.2.6.2	Lipid metabolism.glycerolipid biosynthesis.phosphatidylglycerol.phosphatidylglycerophosphate synthase	solyc02g032840	Id	no hits & (original description: CDP-diacylglycerol--glycerol-3-phosphate 3-phosphatidyltransferase, putative (AHRD V3.3 --* A0A061FTS5_THECC))	-4.11962
5.2.10.1	Lipid metabolism.glycerolipid biosynthesis.triacylglycerols.diacylglycerol O-acyltransferase (DGAT1)	solyc07g040740	Transcript	diacylglycerol O-acyltransferase (DGAT1) (original description: O-acyltransferase (AHRD V3.3 *** K4CDV1_SOLLC)) &	1.74144
5.3.2	Lipid metabolism.galactolipid and sulfolipid biosynthesis.monogalactosyldiacylglycerol synthase (MGD)	solyc12g009820	Transcript	monogalactosyldiacylglycerol synthase (original description: Monogalactosyldiacylglycerol synthase (AHRD V3.3 *** G7JGJ5_MEDTR)) &	1.98523
5.4.9	Lipid metabolism.sphingolipid biosynthesis.delta-8 sphingolipid desaturase	solyc10g011810	Transcript	delta-8 sphingolipid desaturase (original description: Fatty acid/sphingolipid desaturase (AHRD V3.3 *-* AT2G46210.1)) &	2.60263
5.4.10	Lipid metabolism.sphingolipid biosynthesis.sphingolipid fatty acid 2-hydroxylase	solyc02g022890	Transcript	sphingolipid fatty acid 2-hydroxylase (original description: Fatty acid 2-hydroxylase (AHRD V3.3 *** A0A1D1ZHT2_9ARAE)) &	-3.8985
5.4.13.4	Lipid metabolism.sphingolipid biosynthesis.glycosylinositol phosphorylceramide (GIPC) biosynthesis.GIPC N-acetylglucosamine transferase (GINT1)	solyc11g007770	Transcript	GIPC N-acetylglucosamine transferase (GINT1) (original description: Exostosin-2 (AHRD V3.3 *** A0A0B2S0C1_GLYSO)) &	3.89732
5.5	Lipid metabolism.phytosterol biosynthesis	solyc01g079410	Id	no hits & (original description: Calcium-dependent phosphotriesterase superfamily protein (AHRD V3.3 *** A0A061DRE0_THECC))	3.22587
5.5.1.1	Lipid metabolism.phytosterol biosynthesis.campesterol.sterol C-24 methyltransferase	solyc02g077520	Id	Probable O-methyltransferase 3 OS=Humulus lupulus (sp|b0zb57|omt3_humlu : 382.0) & Enzyme classification.EC_2 transferases.EC_2.1 transferase transferring one-carbon group(50.2.1 : 190.6) (original description: O-methyltransferase, putative (AHRD V3.3 *** B9S932_RICCO)) &	-1.69103
5.5.2.3.2	Lipid metabolism.phytosterol biosynthesis.phytosterol conjugation.phytosterol esterification.acyl-CoA:cholesterol acyltransferase	solyc07g065060	Transcript	acyl-CoA:cholesterol acyltransferase (original description: MBOAT (Membrane bound O-acyl transferase) family protein, putative (AHRD V3.3 *** G7K4B1_MEDTR)) &	1.40221
5.7.1	Lipid metabolism.lipid degradation.triacylglycerol lipase activities	solyc01g100930	Id	(original description: GDSL esterase/lipase (AHRD V3.3 *** W9R052_9ROSA)) & GDSL esterase/lipase At1g09390 OS=Arabidopsis thaliana (sp|o80522|gdl2_arath : 494.0)	-1.65962
5.7.1.2.1	Lipid metabolism.lipid degradation.triacylglycerol lipase activities.diacyl-/triacylglycerol lipase activities.lipase (Patatin/SDP)	solyc10g079410	Transcript	Patatin-type lipase (original description: Triacylglycerol lipase SDP1 (AHRD V3.3 *** W9RS42_9ROSA)) &	4.32839
5.7.2.1.1	Lipid metabolism.lipid degradation.phospholipase activities.phospholipase A1 activities.phospholipase A1 (PC-PLA1)	solyc08g078090	Transcript	phospholipase A1 (PC-PLA1) (original description: Alpha/beta-Hydrolases superfamily protein (AHRD V3.3 *** A0A061GB30_THECC)) &	4.63752
5.7.2.1.1	Lipid metabolism.lipid degradation.phospholipase activities.phospholipase A1 activities.phospholipase A1 (PC-PLA1)	solyc11g065530	Transcript	phospholipase A1 (PC-PLA1) (original description: alpha/beta-Hydrolases superfamily protein (AHRD V3.3 *** AT1G51440.1)) &	2.28312
5.7.2.2.4	Lipid metabolism.lipid degradation.phospholipase activities.phospholipase A2 activities.phospholipase A2 (pPLA2-III)	solyc09g065240	Transcript	phospholipase A2 (pPLA2-III) (original description: Patatin (AHRD V3.3 *** K4CUF1_SOLLC)) &	-2.00574
5.7.2.3.1	Lipid metabolism.lipid degradation.phospholipase activities.phospholipase C activities.phospholipase C (nPLC)	solyc03g019670	Transcript	phospholipase C (nPLC) (original description: Non-hemolytic phospholipase C (AHRD V3.3 *** A0A0B2RKR1_GLYSO)) &	6.47796
5.7.2.3.1	Lipid metabolism.lipid degradation.phospholipase activities.phospholipase C activities.phospholipase C (nPLC)	solyc09g020190	Transcript	phospholipase C (nPLC) (original description: non-specific phospholipase C1-like) &	-4.5495
5.7.2.3.2	Lipid metabolism.lipid degradation.phospholipase activities.phospholipase C activities.phospholipase C (PI-PLC)	solyc10g076710	Transcript	phospholipase C (PI-PLC) (original description: Phosphoinositide phospholipase C (AHRD V3.3 *** A0A067L8K5_JATCU)) &	-0.985117
5.7.3.3.2	Lipid metabolism.lipid degradation.fatty acid degradation.alternative beta-oxidation.monofunctionial hydroxyacyl-CoA dehydrogenase	solyc05g054365	Transcript	monofunctionial hydroxyacyl-CoA dehydrogenase (original description: acyl-CoA dehydrogenase-like protein (AHRD V3.3 *** AT3G06810.1)) &	1.63092
5.7.3.6.5	Lipid metabolism.lipid degradation.fatty acid degradation.glyoxylate cycle.peroxisomal NAD-dependent malate dehydrogenase	solyc02g063490	Transcript	peroxisomal NAD-dependent malate dehydrogenase (original description: Malate dehydrogenase (AHRD V3.3 *** K4B6N4_SOLLC)) &	-1.37328
5.7.4.2	Lipid metabolism.lipid degradation.glycerol metabolism.glycerol kinase	solyc03g117490	Transcript	glycerol kinase (original description: Glycerol kinase (AHRD V3.3 *** GLPK_ARATH)) &	5.94533
5.8.2.1	Lipid metabolism.lipid trafficking.endoplasmic reticulum-plastid lipid transfer.phospholipid transverse translocation	solyc02g070210	Id	(original description: Sec14p-like phosphatidylinositol transfer family protein (AHRD V3.3 *** A0A061G966_THECC)) & Patellin-4 OS=Arabidopsis thaliana (sp|q94c59|patl4_arath : 454.0)	2.92354
5.8.2.1	Lipid metabolism.lipid trafficking.endoplasmic reticulum-plastid lipid transfer.phospholipid transverse translocation	solyc01g005290	Id	no hits & (original description: Sec14p-like phosphatidylinositol transfer family protein (AHRD V3.3 *-* AT1G14820.3))	5.03696
5.8.2.1.1.1	Lipid metabolism.lipid trafficking.endoplasmic reticulum-plastid lipid transfer.phospholipid transverse translocation.ALA-ALIS flippase complex.active component ALA	solyc01g096930	Transcript	active component ALA of ALA-ALIS flippase complex (original description: Phospholipid-transporting ATPase (AHRD V3.3 *** B9RL26_RICCO)) &	3.21429
5.8.2.1.1.1	Lipid metabolism.lipid trafficking.endoplasmic reticulum-plastid lipid transfer.phospholipid transverse translocation.ALA-ALIS flippase complex.active component ALA	solyc02g069430	Transcript	active component ALA of ALA-ALIS flippase complex (original description: Phospholipid-transporting ATPase (AHRD V3.3 *** K4B7S5_SOLLC)) &	-4.51128
5.8.3	Lipid metabolism.lipid trafficking.fatty acid export protein (FAX)	solyc04g016440	Transcript	fatty acid export protein (FAX) (original description: Transmembrane proteins 14C (AHRD V3.3 *** AT3G57280.1)) &	4.58833

## Sheet: 06_Nucleotide_metabolism
Supplementary Table 21. Mapman categories of DMPs with present DEGs between phyB1B2_BK and WT_BK.
BinCode	BinName	id	type	description	PHYB1B2_DMP_DE_BK_All.txt
6.1	Nucleotide metabolism.purines	solyc05g043390	Id	no hits & (original description: Pseudouridine-5'-phosphate glycosidase (AHRD V3.3 --* M7YM69_TRIUA))	-9.0085
6.1.1.2	Nucleotide metabolism.purines.ribonucleotide (RN) anabolism.glycinamide RN synthetase (GARS)	solyc01g103440	Transcript	glycinamide RN synthetase (GARS) (original description: Phosphoribosylamine-glycine ligase (AHRD V3.3 *** G7K3Z1_MEDTR)) &	1.40818
6.1.1.4	Nucleotide metabolism.purines.ribonucleotide (RN) anabolism.formylglycinamidine RN synthase	solyc01g107270	Transcript	formylglycinamidine RN synthase (original description: 40S ribosomal protein S24 (AHRD V3.3 *-* A0A0D3F2R2_9ORYZ)) &	2.1866
6.1.1.10	Nucleotide metabolism.purines.ribonucleotide (RN) anabolism.adenylosuccinate synthase	solyc02g085520	Transcript	adenylosuccinate synthase (original description: Adenylosuccinate synthetase, chloroplastic (AHRD V3.3 *** PURA_SOLBU)) &	4.87669
6.1.1.11	Nucleotide metabolism.purines.ribonucleotide (RN) anabolism.GMP synthase	solyc08g081155	Transcript	GMP synthase (original description: GMP synthase (AHRD V3.3 *** W8TFM6_TOBAC)) &	4.20821
6.1.3.1	Nucleotide metabolism.purines.phosphotransfers.adenylate kinase	solyc06g065270	Transcript	adenylate kinase (original description: Adenylate kinase (AHRD V3.3 *** G7JRB1_MEDTR)) &	-5.257
6.1.4	Nucleotide metabolism.purines.catabolism	solyc02g064795	Id	no hits & (original description: Polynucleotidyl transferase, ribonuclease H-like superfamily protein (AHRD V3.3 --* AT3G01410.2))	3.55677
6.2.4.1	Nucleotide metabolism.pyrimidines.catabolism.5'-nucleotidase	solyc11g006420	Transcript	5prime-nucleotidase (original description: Cytosolic 5-nucleotidase (AHRD V3.3 *** A0A059Q189_9POAL)) &	3.64388
6.3.1.1.1	Nucleotide metabolism.deoxynucleotides.biosynthesis.ribonucleoside-diphosphate reductase heterodimer.large subunit	solyc04g012060	Transcript	large subunit of ribonucleoside-diphosphate reductase heterodimer (original description: Ribonucleoside-diphosphate reductase (AHRD V3.3 *** K4BPQ8_SOLLC)) &	9.08982
6.3.1.1.1	Nucleotide metabolism.deoxynucleotides.biosynthesis.ribonucleoside-diphosphate reductase heterodimer.large subunit	solyc04g051350	Transcript	large subunit of ribonucleoside-diphosphate reductase heterodimer (original description: Ribonucleoside-diphosphate reductase (AHRD V3.3 *** K4BS95_SOLLC)) &	1.55177
6.3.2.1	Nucleotide metabolism.deoxynucleotides.salvage pathway.thymidine kinase (TK1)	solyc11g065760	Transcript	thymidine kinase (TK1) (original description: TK1-like deoxyribonucleoside kinase) &	3.57515
6.3.2.4	Nucleotide metabolism.deoxynucleotides.salvage pathway.nucleoside diphosphate kinase	solyc06g071960	Transcript	nucleoside diphosphate kinase (original description: Nucleoside diphosphate kinase (AHRD V3.3 *** K4C8R8_SOLLC)) &	4.00795
6.3.2.4	Nucleotide metabolism.deoxynucleotides.salvage pathway.nucleoside diphosphate kinase	solyc08g082430	Transcript	nucleoside diphosphate kinase (original description: Nucleoside diphosphate kinase (AHRD V3.3 *** K4CPN9_SOLLC)) &	-5.59269

## Sheet: 07_Coenzyme_metabolism
Supplementary Table 21. Mapman categories of DMPs with present DEGs between phyB1B2_BK and WT_BK.
BinCode	BinName	id	type	description	PHYB1B2_DMP_DE_BK_All.txt
7	Coenzyme metabolism	solyc01g008550	Id	(original description: phenylacetaldehyde reductase PAR2) & Cinnamoyl-CoA reductase 1 OS=Arabidopsis thaliana (sp|q9s9n9|ccr1_arath : 300.0)	1.11644
7	Coenzyme metabolism	solyc01g010370	Id	(original description: S-adenosyl-L-methionine-dependent methyltransferases superfamily protein (AHRD V3.3 *** AT1G78240.2)) & Probable methyltransferase PMT5 OS=Arabidopsis thaliana (sp|q3ec77|pmt5_arath : 797.0)	2.05152
7	Coenzyme metabolism	solyc02g081360	Id	(original description: CoA ligase (AHRD V3.3 *** A0A0K9NMT8_ZOSMR)) & Butyrate--CoA ligase AAE11, peroxisomal OS=Arabidopsis thaliana (sp|q9c8d4|aae11_arath : 660.0)	4.65852
7	Coenzyme metabolism	solyc08g005490	Id	(original description: S-adenosyl-L-methionine-dependent methyltransferases superfamily protein (AHRD V3.3 *** AT1G31850.4)) & Probable methyltransferase PMT20 OS=Arabidopsis thaliana (sp|q9c6s7|pmtk_arath : 991.0)	1.03172
7.5.7.1	Coenzyme metabolism.tetrahydrofolate biosynthesis.tetrahydrofolate (THF) interconversions.10-formyl-THF synthetase	solyc01g006280	Transcript	10-formyl-THF synthetase (original description: Formate--tetrahydrofolate ligase (AHRD V3.3 *** FTHS_SPIOL)) &	6.9162
7.5.7.5	Coenzyme metabolism.tetrahydrofolate biosynthesis.tetrahydrofolate (THF) interconversions.5-formyl-THF cycloligase	solyc03g113590	Transcript	5-formyl-THF cycloligase (original description: 5-formyltetrahydrofolate cycloligase) &	2.45158
7.8.1.1	Coenzyme metabolism.prenylquinone biosynthesis.4-hydroxybenzoate biosynthesis.p-coumarate:CoA ligase	solyc12g042460	Transcript	p-coumarate:CoA ligase (original description: 4-coumarate--CoA ligase-like) &	1.25641
7.9.1.2	Coenzyme metabolism.NAD/NADP biosynthesis.de-novo pathway.quinolinate synthase	solyc03g112060	Transcript	quinolinate synthase (original description: Quinolinate synthase A (AHRD V3.3 *** W9RJG8_9ROSA)) &	4.56805
7.10.2	Coenzyme metabolism.FMN/FAD biosynthesis.bifunctional GTP cyclohydrolase II (RibA) and DHBP synthase (RibB)	solyc01g105560	Transcript	bifunctional GTP cyclohydrolase II (RibA) and DHBP synthase (RibB) (original description: GTP cyclohydrolase II/3,4-dihydroxy-2-butanone 4-phosphate synthase) &	2.27908
7.11.1.1.1.2	Coenzyme metabolism.iron-sulfur cluster assembly machinery.plastidial SUF system.assembly phase.SUF-BCD scaffold complex.component SUF-C	solyc06g048540	Transcript	component SUF-C of plastidial SUF system assembly phase (original description: ABC transporter family protein (AHRD V3.3 *** A0A097P9T8_HEVBR)) &	3.00633
7.11.1.1.2.1	Coenzyme metabolism.iron-sulfur cluster assembly machinery.plastidial SUF system.assembly phase.SUF-SE sulfur transfer complex.cysteine desulfurase component NFS2	solyc05g055000	Transcript	cysteine desulfurase component NFS2 of plastidial SUF system assembly phase (original description: Cysteine desulfurase family protein (AHRD V3.3 *** B9HNK4_POPTR)) &	2.67313
7.12.1.1	Coenzyme metabolism.tetrapyrrol biosynthesis.5-aminolevulinic acid formation.glutamyl-tRNA synthetase	solyc01g112290	Transcript	glutamyl-tRNA synthetase (original description: glutamate tRNA synthetase (AHRD V3.3 *-* AT5G64050.1)) &	-1.64155
7.12.1.3.2	Coenzyme metabolism.tetrapyrrol biosynthesis.5-aminolevulinic acid formation.glutamyl-tRNA reductase regulation.regulatory factor (GluTRBP)	solyc03g123880	Transcript	regulatory glutamyl-tRNA reductase-binding protein (original description: Glutamyl-tRNA reductase binding protein (AHRD V3.3 *** E9N732_TOBAC)) &	3.43716
7.12.2.2	Coenzyme metabolism.tetrapyrrol biosynthesis.uroporphyrinogen III formation.porphobilinogen deaminase	solyc07g066470	Transcript	porphobilinogen deaminase (original description: Porphobilinogen deaminase, putative (AHRD V3.3 *** B9S2Z0_RICCO)) &	-4.95743
7.12.4.1	Coenzyme metabolism.tetrapyrrol biosynthesis.protoporphyrin IX formation.uroporphyrinogen III decarboxylase	solyc06g048730	Transcript	uroporphyrinogen III decarboxylase (original description: Uroporphyrinogen decarboxylase (AHRD V3.3 *** K4C5B9_SOLLC)) &	1.06874
7.12.4.2.1	Coenzyme metabolism.tetrapyrrol biosynthesis.protoporphyrin IX formation.coproporphyrinogen III oxidase activities.oxygen-dependent coproporphyrinogen III oxidase (HemF)	solyc10g005110	Transcript	oxygen-dependent coproporphyrinogen III oxidase (HemF) (original description: Coproporphyrinogen III oxidase (AHRD V3.3 *** AT1G03475.1)) &	-34.7915
7.12.6.5.2	Coenzyme metabolism.tetrapyrrol biosynthesis.chlorophyll metabolism.protochlorophyllide oxidoreductase (POR) activities.light-dependent POR chaperone (CPP1)	solyc02g062350	Transcript	light-dependent protochlorophyllide oxidoreductase chaperone (CPP1) (original description: DnaJ, mitochondrial (AHRD V3.3 *** A0A0B0PT99_GOSAR)) &	-3.52875
7.12.6.5.2	Coenzyme metabolism.tetrapyrrol biosynthesis.chlorophyll metabolism.protochlorophyllide oxidoreductase (POR) activities.light-dependent POR chaperone (CPP1)	solyc03g114470	Transcript	light-dependent protochlorophyllide oxidoreductase chaperone (CPP1) (original description: Cell growth defect factor-like (AHRD V3.3 *** Q307Y4_SOLTU)) &	-4.24242
7.13.5	Coenzyme metabolism.phylloquinone biosynthesis.1,4-dihydroxy-2-naphthoyl-CoA thioesterase	solyc03g006450	Transcript	1,4-dihydroxy-2-naphthoyl-CoA thioesterase (original description: Thioesterase family protein (AHRD V3.3 *** D7KCZ7_ARALL)) &	6.22354

## Sheet: 08_Polyamine_metabolism
Supplementary Table 21. Mapman categories of DMPs with present DEGs between phyB1B2_BK and WT_BK.
BinCode	BinName	id	type	description	PHYB1B2_DMP_DE_BK_All.txt
8	Polyamine metabolism	solyc02g083990	Id	no hits & (original description: polyamine-modulated factor 1-binding protein (AHRD V3.3 *** AT2G17990.3))	4.91521
8.1.1.1	Polyamine metabolism.putrescine biosynthesis.plastidial/nuclear pathway.arginine decarboxylase	solyc10g054440	Transcript	arginine decarboxylase (original description: arginine decarboxylase 1) &	6.89022
8.2.4	Polyamine metabolism.spermidine biosynthesis.thermospermine synthase	solyc08g061970	Transcript	thermospermine synthase (original description: putative spermine synthase) &	2.18769

## Sheet: 09_Secondary_metabolism
Supplementary Table 21. Mapman categories of DMPs with present DEGs between phyB1B2_BK and WT_BK.
BinCode	BinName	id	type	description	PHYB1B2_DMP_DE_BK_All.txt
9.1.1.2	Secondary metabolism.terpenoids.mevalonate pathway.3-hydroxy-3-methylglutaryl-CoA synthase	solyc08g080170	Transcript	3-hydroxy-3-methylglutaryl-CoA synthase (original description: Hydroxymethylglutaryl-CoA synthase, putative (AHRD V3.3 *** B9RC08_RICCO)) &	1.21565
9.1.1.5	Secondary metabolism.terpenoids.mevalonate pathway.phosphomevalonate kinase	solyc06g066310	Transcript	phosphomevalonate kinase (original description: Phosphomevalonate kinase (AHRD V3.3 *** A0A0X9ZV04_9ROSI)) &	-23.8904
9.1.1.7	Secondary metabolism.terpenoids.mevalonate pathway.isopentenyl diphosphate isomerase	solyc04g056390	Transcript	isopentenyl diphosphate isomerase (original description: isopentenyl diphosphate isomerase) &	1.55225
9.1.2.1.1	Secondary metabolism.terpenoids.methylerythritol phosphate (MEP) pathway.1-deoxy-d-xylulose 5-phosphate import.D-xylulose kinase	solyc04g077030	Transcript	D-xylulose kinase (original description: Xylulose kinase, putative (AHRD V3.3 *** A0A061FE36_THECC)) &	1.67332
9.1.3.3	Secondary metabolism.terpenoids.isoprenyl diphosphate biosynthesis.isoprenyl diphosphate synthase	solyc11g011250	Transcript	isoprenyl diphosphate synthase (original description: dehydroascorbate reductase 2) &	1.28047
9.1.4.2	Secondary metabolism.terpenoids.terpene biosynthesis.mono-/sesquiterpene-/diterpene synthase	solyc01g101180	Transcript	mono-/sesquiterpene-/diterpene synthase (original description: viridiflorene synthase) &	1.94875
9.1.4.3	Secondary metabolism.terpenoids.terpene biosynthesis.triterpenoid synthase	solyc12g006530	Transcript	triterpenoid synthase (original description: Terpene cyclase/mutase family member (AHRD V3.3 *** M1BMW3_SOLTU)) &	1.36556
9.1.6.1.2	Secondary metabolism.terpenoids.carotenoid biosynthesis.carotenes.phytoene desaturase (PDS)	solyc03g123760	Transcript	phytoene desaturase (PDS) (original description: phytoene desaturase) &	-2.97875
9.1.6.1.3	Secondary metabolism.terpenoids.carotenoid biosynthesis.carotenes.zeta-carotene isomerase (Z-ISO)	solyc12g098710	Transcript	zeta-carotene isomerase (Z-ISO) (original description: 15-cis-zeta-carotene isomerase (AHRD V3.3 *** A0A0A7DVN8_LYCBA)) &	7.18925
9.1.6.1.4	Secondary metabolism.terpenoids.carotenoid biosynthesis.carotenes.zeta-carotene desaturase (ZDS)	solyc01g097810	Transcript	zeta-carotene desaturase (ZDS) (original description: zeta-carotene desaturase) &	3.58101
9.1.6.1.5	Secondary metabolism.terpenoids.carotenoid biosynthesis.carotenes.lycopene epsilon cyclase (LCY-e)	solyc12g008980	Transcript	lycopene epsilon cyclase (LCY-e) (original description: Delta) &	3.49292
9.1.6.2.1.1	Secondary metabolism.terpenoids.carotenoid biosynthesis.xanthophylls.carotenoid hydroxylase activities.carotenoid beta-ring hydroxylase (BCH)	solyc06g036260	Transcript	carotenoid beta ring hydroxylase (original description: beta-carotene hydroxylase-1) &	3.63655
9.2.1.1.1	Secondary metabolism.phenolics.p-coumaroyl-CoA biosynthesis.phenylalanine ammonia lyase activity.phenylalanine ammonia lyase (PAL)	solyc05g056170	Transcript	phenylalanine ammonia lyase (PAL) (original description: phenylalanine ammonia-lyase 2) &	-3.91412
9.2.1.1.1	Secondary metabolism.phenolics.p-coumaroyl-CoA biosynthesis.phenylalanine ammonia lyase activity.phenylalanine ammonia lyase (PAL)	solyc09g007910	Transcript	phenylalanine ammonia lyase (PAL) (original description: Phenylalanine ammonia-lyase (AHRD V3.3 *** PAL5_SOLLC)) &	5.43449
9.2.1.1.1	Secondary metabolism.phenolics.p-coumaroyl-CoA biosynthesis.phenylalanine ammonia lyase activity.phenylalanine ammonia lyase (PAL)	solyc09g007920	Transcript	phenylalanine ammonia lyase (PAL) (original description: Phenylalanine ammonia-lyase (AHRD V3.3 *** PAL5_SOLLC)) &	2.22411
9.2.1.1.2	Secondary metabolism.phenolics.p-coumaroyl-CoA biosynthesis.phenylalanine ammonia lyase activity.proteolytic phenylalanine ammonia-lyase regulator (KFB-PAL)	solyc10g080610	Transcript	proteolytic phenylalanine ammonia-lyase regulator (KFB-PAL) (original description: F-box/kelch-repeat protein (AHRD V3.3 *** A0A172MAC1_VITPS)) &	5.52955
9.2.2.1.1.2	Secondary metabolism.phenolics.flavonoid biosynthesis.chalcones.chalcone synthase activity.proteolytic chalcone synthase regulator (KFB-CHS)	solyc05g005150	Transcript	proteolytic chalcone synthase regulator (KFB-CHS) (original description: Kelch repeat-containing F-box family protein, putative (AHRD V3.3 *** A0A061E7C3_THECC)) &	1.851
9.2.2.2.1	Secondary metabolism.phenolics.flavonoid biosynthesis.flavanones.chalcone isomerase	solyc02g083890	Id	no hits & (original description: Chalcone-flavanone isomerase family protein (AHRD V3.3 *** AT5G66230.1))	1.95057
9.2.2.4.3	Secondary metabolism.phenolics.flavonoid biosynthesis.dihydroflavonols.flavanone 3-hydroxylase	solyc02g083860	Transcript	flavanone 3-hydroxylase (original description: flavanone 3-dioxygenase) &	3.36627
9.2.2.5.1	Secondary metabolism.phenolics.flavonoid biosynthesis.flavonols.flavonol synthase	solyc11g013110	Transcript	flavonol synthase (original description: Flavonol synthase (AHRD V3.3 *** C0LUV3_SOLTU)) &	2.05829
9.2.2.6.1	Secondary metabolism.phenolics.flavonoid biosynthesis.flavonol glycosides.flavonol 3-O-glycosyltransferase	solyc01g107830	Transcript	flavonol 3-O-glycosyltransferase (original description: Glycosyltransferase (AHRD V3.3 *** K4B2Z9_SOLLC)) &	6.19484
9.2.2.7.1	Secondary metabolism.phenolics.flavonoid biosynthesis.aurones.aureusidin synthase	solyc08g074682	Transcript	aureusidin synthase (original description: polyphenol oxidase precursor) &	2.08464
9.3.1.1	Secondary metabolism.alkaloids.indole alkaloid biosynthesis.aromatic L-amino acid decarboxylase	solyc07g054860	Transcript	aromatic L-amino acid decarboxylase (original description: Tyrosine decarboxylase (AHRD V3.3 *** Q000T5_ARICO)) &	2.19919
9.5.1.10.2	Secondary metabolism.glucosinolates.glucosinolate biosynthesis.secondary modifications.glucosinolate 2-oxoglutarate-dependent dioxygenase (AOP)	solyc12g006380	Id	1-aminocyclopropane-1-carboxylate oxidase homolog OS=Solanum lycopersicum (sp|p10967|acch3_sollc : 438.0) & Enzyme classification.EC_1 oxidoreductases.EC_1.14 oxidoreductase acting on paired donor with incorporation or reduction of molecular oxygen(50.1.13 : 152.5) (original description: 2-oxoglutarate-dependent dioxygenase) &	-1.09106

## Sheet: 10_Redox_homeostasis
Supplementary Table 21. Mapman categories of DMPs with present DEGs between phyB1B2_BK and WT_BK.
BinCode	BinName	id	type	description	PHYB1B2_DMP_DE_BK_All.txt
10	Redox homeostasis	solyc02g064950	Id	(original description: CBS domain-containing protein-like (AHRD V3.3 *** B8AP73_ORYSI)) & Protein IRX15-LIKE OS=Arabidopsis thaliana (sp|q9fh92|ix15l_arath : 381.0)	-3.79378
10	Redox homeostasis	solyc02g070770	Id	(original description: NAD(P)-binding Rossmann-fold superfamily protein (AHRD V3.3 *** AT2G34460.1)) & Uncharacterized protein At2g34460, chloroplastic OS=Arabidopsis thaliana (sp|q8h124|y2446_arath : 347.0)	-2.54945
10	Redox homeostasis	solyc01g111110	Id	no hits & (original description: Oxidoreductase/transition metal ion-binding protein (AHRD V3.3 -** A2Q3C9_MEDTR))	4.12697
10	Redox homeostasis	solyc02g070110	Id	Enzyme classification.EC_1 oxidoreductases.EC_1.1 oxidoreductase acting on CH-OH group of donor(50.1.1 : 518.8) & Berberine bridge enzyme-like 28 OS=Arabidopsis thaliana (sp|q9fi21|bbe28_arath : 496.0) (original description: FAD-binding Berberine family protein (AHRD V3.3 *** A0A061GF79_THECC)) &	3.85464
10.1.1	Redox homeostasis.reactive oxygen generation.NADPH-oxidase (Rboh)	solyc03g117980	Transcript	NADPH-oxidase (Rboh) (original description: whitefly-induced gp91-phox) &	-3.0322
10.1.1	Redox homeostasis.reactive oxygen generation.NADPH-oxidase (Rboh)	solyc08g081690	Transcript	NADPH-oxidase (Rboh) (original description: NADPH oxidase) &	2.51048
10.2.1	Redox homeostasis.enzymatic reactive oxygen species scavengers.catalase	solyc04g082460	Transcript	catalase (original description: Catalase 3) &	2.66788
10.2.2.1	Redox homeostasis.enzymatic reactive oxygen species scavengers.superoxide dismutase activities.iron superoxide dismutase	solyc02g021140	Transcript	iron superoxide dismutase (original description: Superoxide dismutase (AHRD V3.3 *** K4B4W4_SOLLC)) &	4.53233
10.2.2.1	Redox homeostasis.enzymatic reactive oxygen species scavengers.superoxide dismutase activities.iron superoxide dismutase	solyc06g048410	Transcript	iron superoxide dismutase (original description: iron superoxide dismutase) &	4.0377
10.2.2.3	Redox homeostasis.enzymatic reactive oxygen species scavengers.superoxide dismutase activities.copper/zinc superoxide dismutase	solyc11g066390	Transcript	copper/zinc superoxide dismutase (original description: superoxide dismutase 3) &	-1.44037
10.3.3.1.1	Redox homeostasis.low-molecular-weight scavengers.glutathione metabolism.glutathione biosynthesis.gamma-glutamyl:cysteine ligase	solyc08g081010	Transcript	gamma-glutamyl:cysteine ligase (original description: gamma-glutamylcysteine synthetase 1) &	1.42563
10.3.3.2.1	Redox homeostasis.low-molecular-weight scavengers.glutathione metabolism.glutathione degradation.gamma-glutamyl cyclotransferase	solyc08g006150	Transcript	gamma-glutamyl cyclotransferase (original description: Gamma-glutamylcyclotransferase (AHRD V3.3 *** K4CIA4_SOLLC)) &	4.94295
10.3.3.2.1	Redox homeostasis.low-molecular-weight scavengers.glutathione metabolism.glutathione degradation.gamma-glutamyl cyclotransferase	solyc12g096320	Transcript	gamma-glutamyl cyclotransferase (original description: Gamma-glutamylcyclotransferase (AHRD V3.3 *** K4DHA5_SOLLC)) &	3.10549
10.4	Redox homeostasis.hydrogen peroxide removal	solyc01g006290	Id	(original description: Peroxidase (AHRD V3.3 *** K4ASJ5_SOLLC)) & Lignin-forming anionic peroxidase OS=Nicotiana tabacum (sp|p11965|perx_tobac : 482.0)	1.89825
10.4	Redox homeostasis.hydrogen peroxide removal	solyc02g079500	Id	(original description: Peroxidase (AHRD V1 **** Q50LG4_TOBAC)%3B contains Interpro domain(s) IPR019793 Peroxidases heam-ligand binding site IPR019794 Peroxidase%2C active site IPR002016 Haem peroxidase%2C plant/fungal/bacterial) & Suberization-associated anionic peroxidase 1 OS=Solanum lycopersicum (sp|p15003|per1_sollc : 649.0)	2.28452
10.4	Redox homeostasis.hydrogen peroxide removal	solyc02g079510	Id	(original description: Peroxidase (AHRD V1 **** Q50LG4_TOBAC)%3B contains Interpro domain(s) IPR019793 Peroxidases heam-ligand binding site IPR019794 Peroxidase%2C active site IPR002016 Haem peroxidase%2C plant/fungal/bacterial) & Suberization-associated anionic peroxidase 2 OS=Solanum lycopersicum (sp|p15004|per2_sollc : 611.0)	5.29934
10.4	Redox homeostasis.hydrogen peroxide removal	solyc02g080530	Id	(original description: Peroxidase (AHRD V3.3 *** K4B9S4_SOLLC)) & Peroxidase 42 OS=Arabidopsis thaliana (sp|q9sb81|per42_arath : 540.0)	1.05793
10.4.1.1	Redox homeostasis.hydrogen peroxide removal.ascorbate-glutathione cycle.ascorbate peroxidase (APX)	solyc06g005160	Transcript	ascorbate peroxidase (APX) (original description: Ascorbate peroxidase (AHRD V3.3 *** Q9SMD3_SOLLC)) &	-2.53097
10.5.1.2	Redox homeostasis.chloroplast redox homeostasis.ferredoxin-dependent thioredoxin reductase (FTR) complex.subunit beta	solyc02g087230	Transcript	subunit beta of ferredoxin-dependent thioredoxin reductase (FTR) complex (original description: Ferredoxin-thioredoxin reductase catalytic chain (AHRD V3.3 *** W9SEM5_9ROSA)) &	-2.03645
10.6.1	Redox homeostasis.cytosol/mitochondrion/nucleus redox homeostasis.H-type thioredoxin	solyc05g006870	Transcript	H-type thioredoxin (original description: Thioredoxin H (AHRD V3.3 *** Q4U0W0_NICAL)) &	2.16358

[truncated: 19 more sheets: 11_Phytohormone_action, 12_Chromatin_organisation, 13_Cell_cycle_organisation, 14_DNA_damage_response, 15_RNA_biosynthesis, 16_RNA_processing, 17_Protein_biosynthesis, 18_Protein_modification, 19_Protein_homeostasis, 20_Cytoskeleton_organisation, 21_Cell_wall_organisation, 22_Vesicle_trafficking, 23_Protein_translocation, 24_Solute_transport, 25_Nutrient_uptake, 26_External_stimuli_response, 27_Multi-process_regulation, 35_not_assigned, 50_Enzyme_classification]
